# Supplementary material for: Coping with living in the soil: the genome of the parthenogenetic springtail Folsomia candida
Source: PubMed Central journal article supplement (PMC5490193; doi:10.1186/s12864-017-3852-x), 2017-06-28
Supplement: 12864_2017_3852_MOESM3_ESM.pdf [file 12864_2017_3852_MOESM3_ESM.pdf]

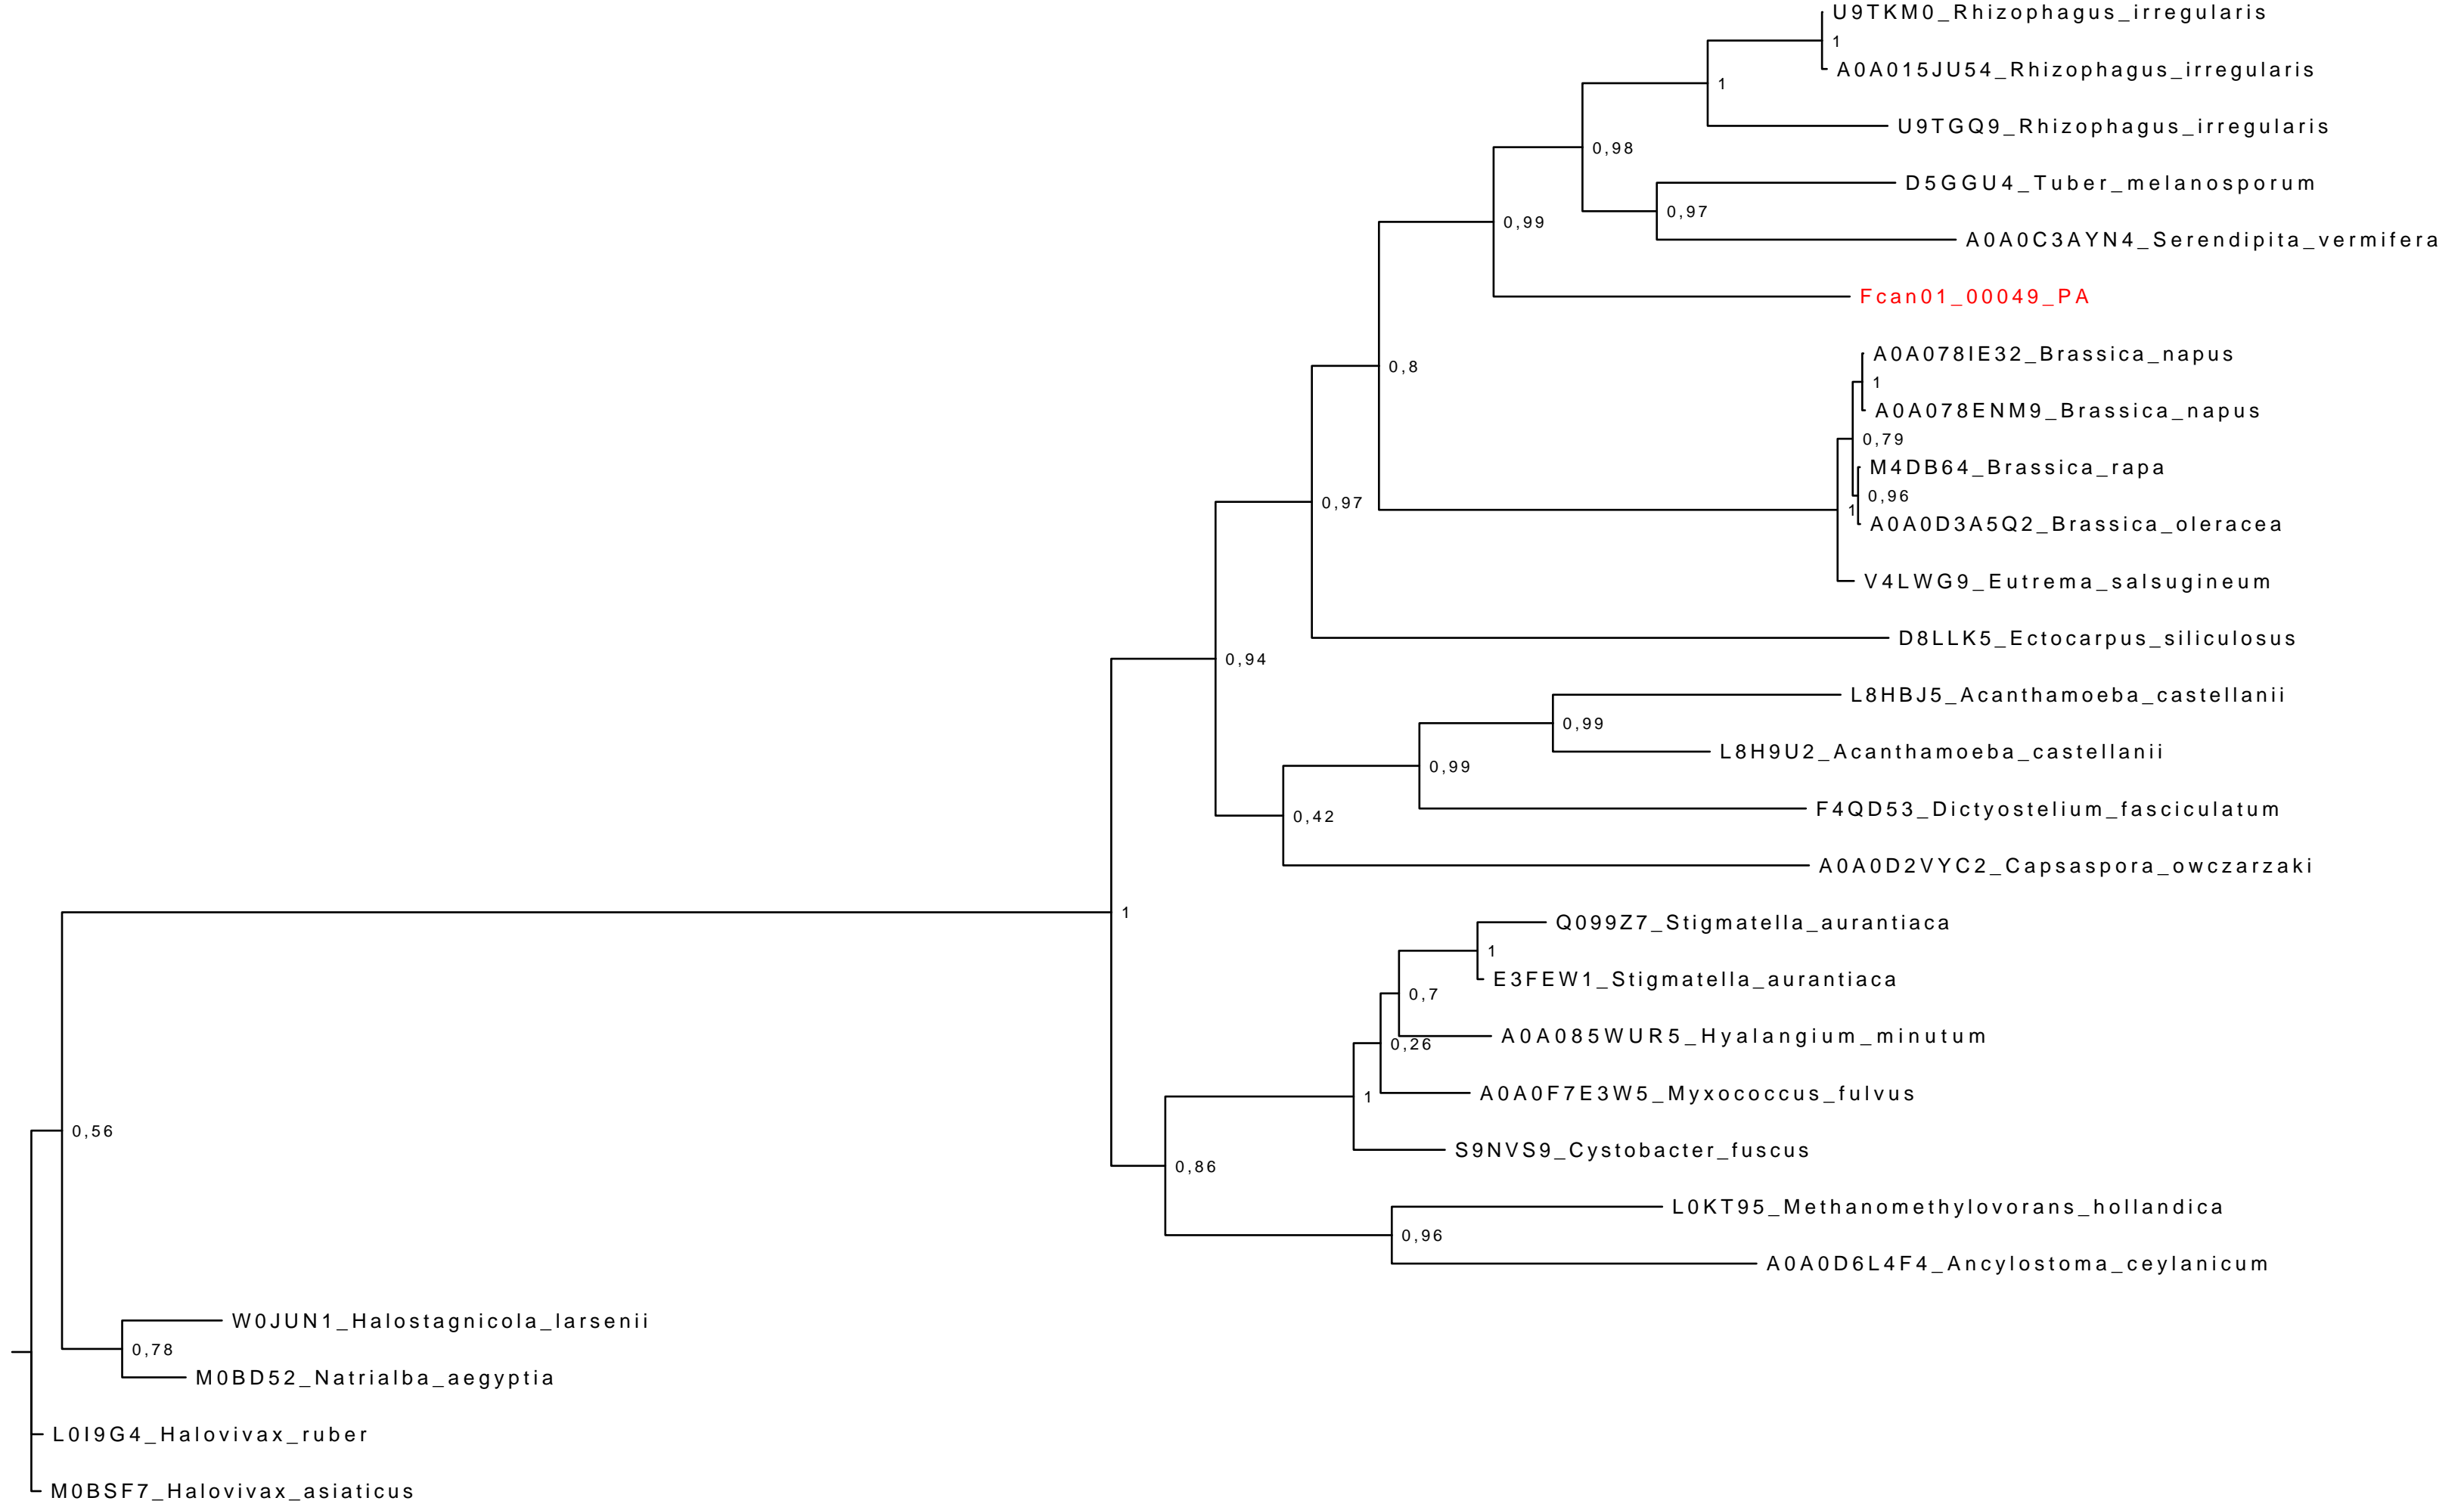

0.4

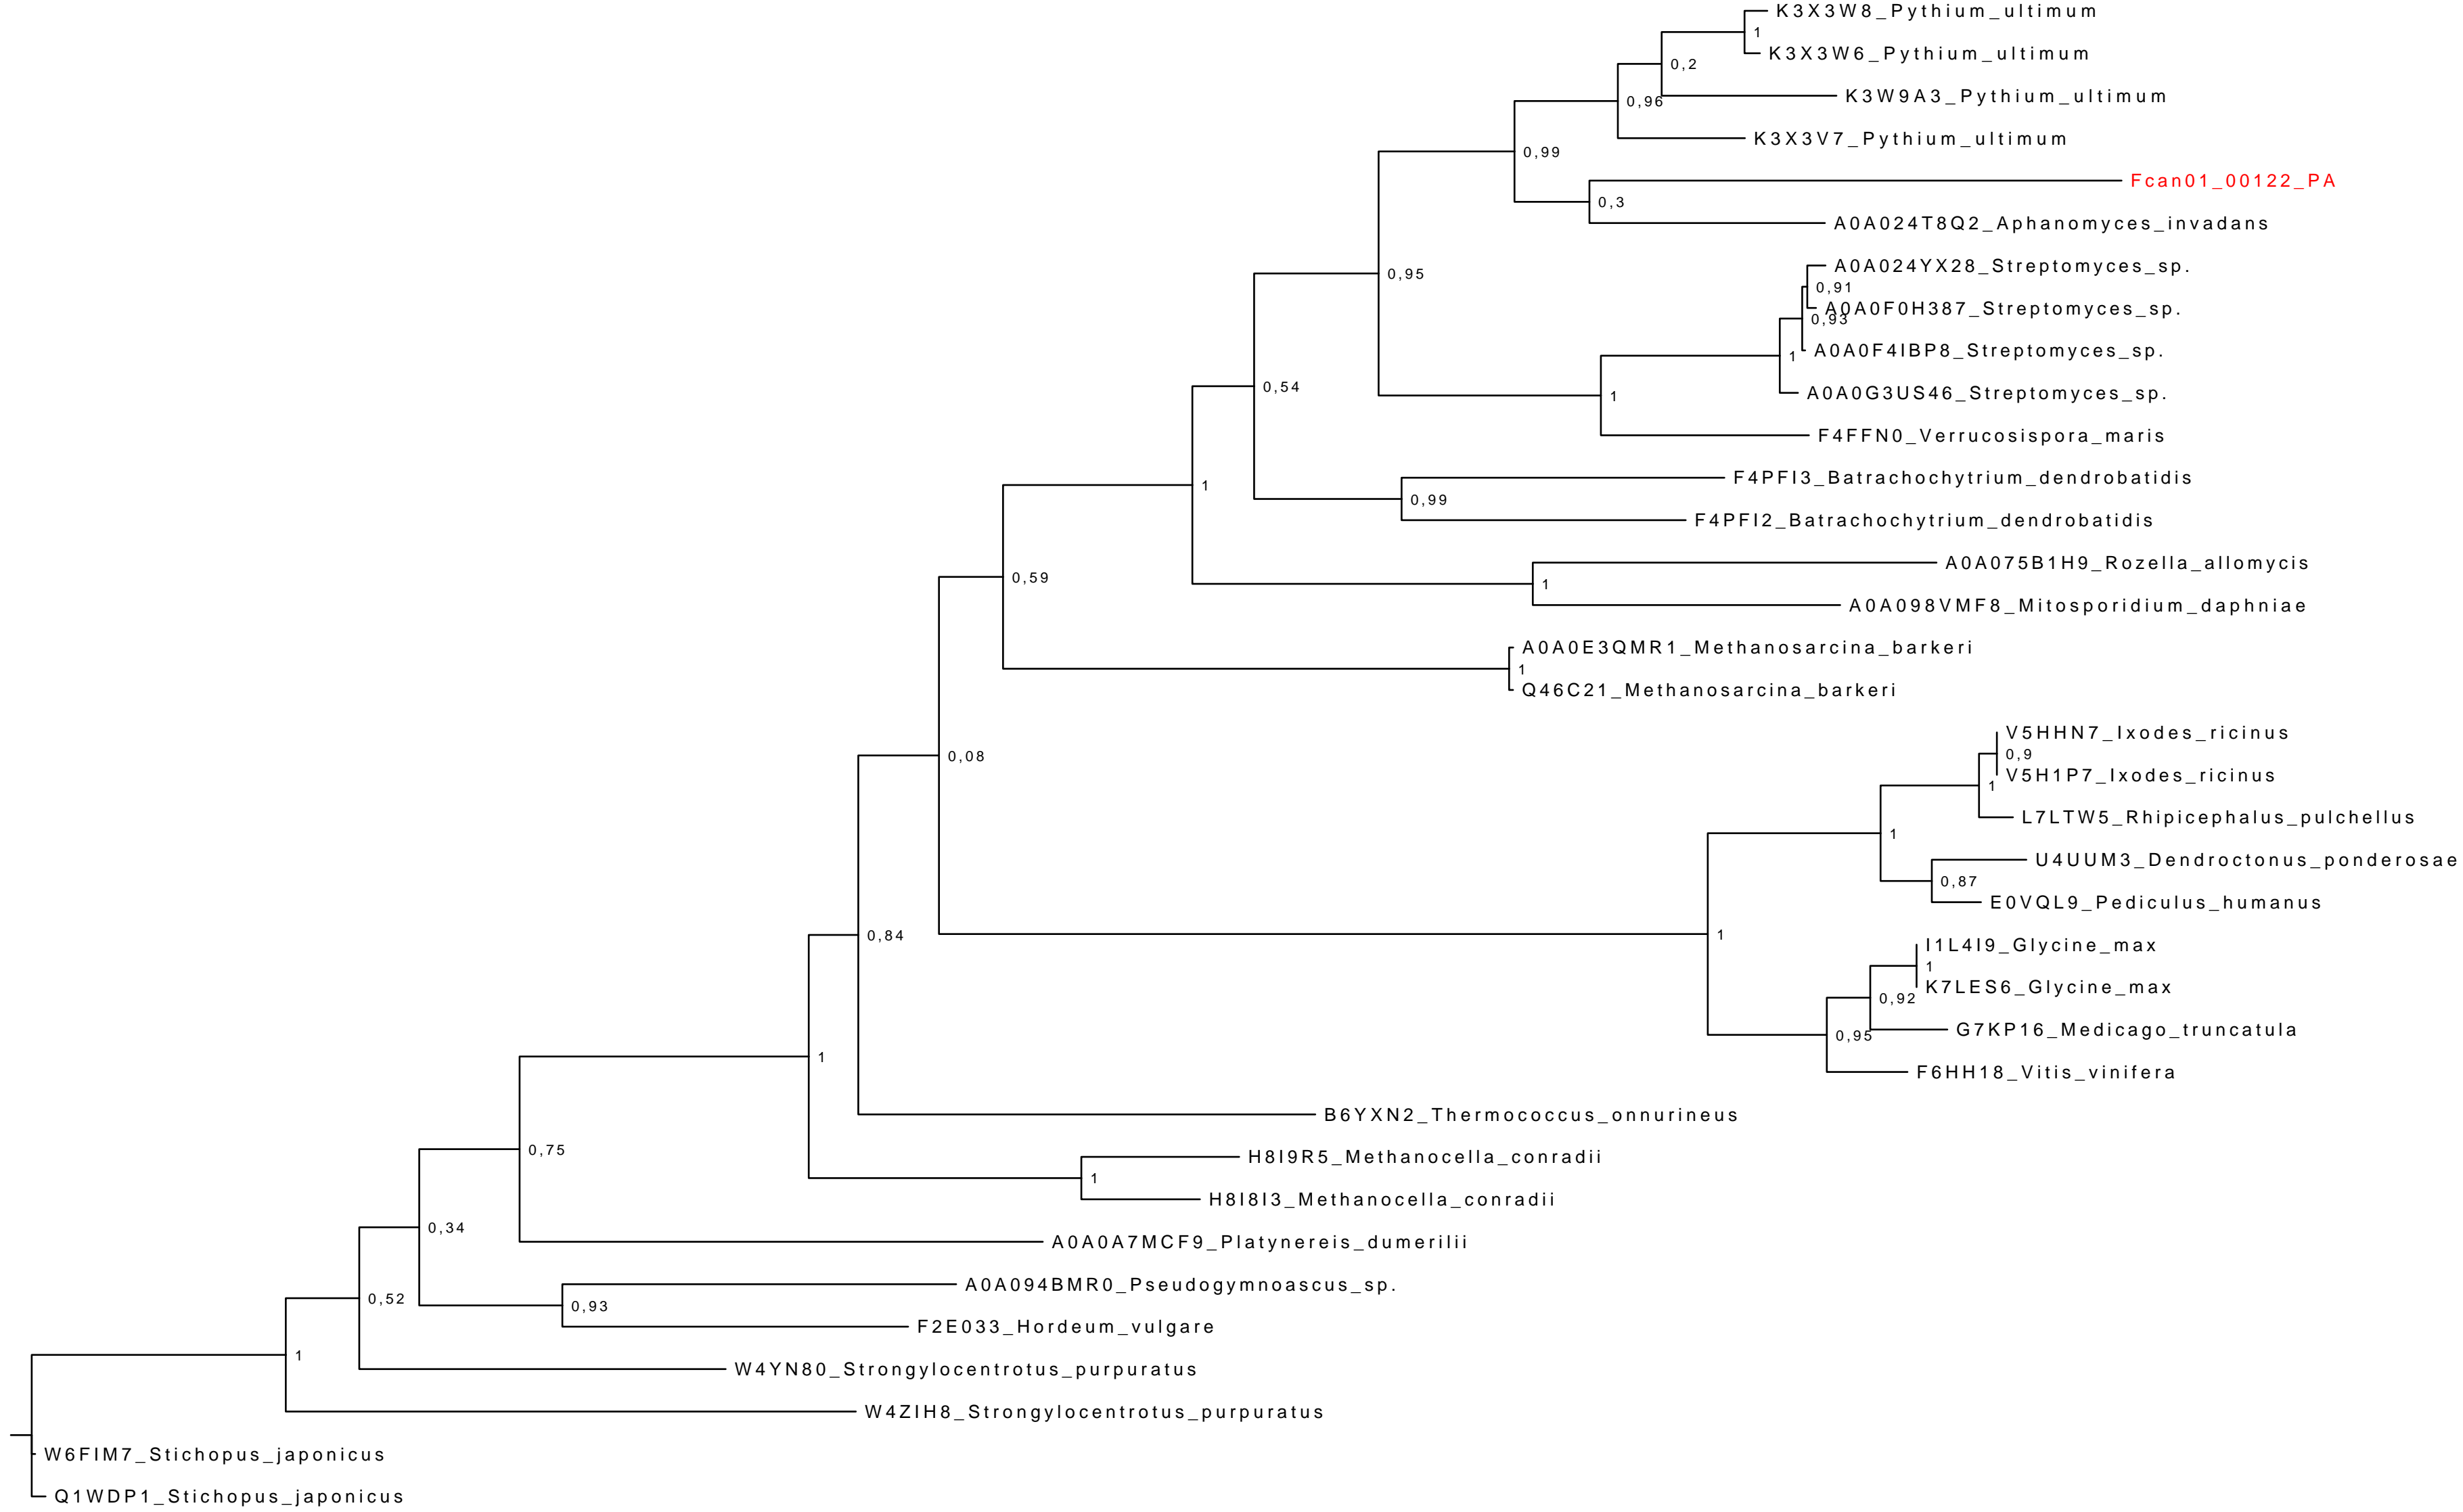

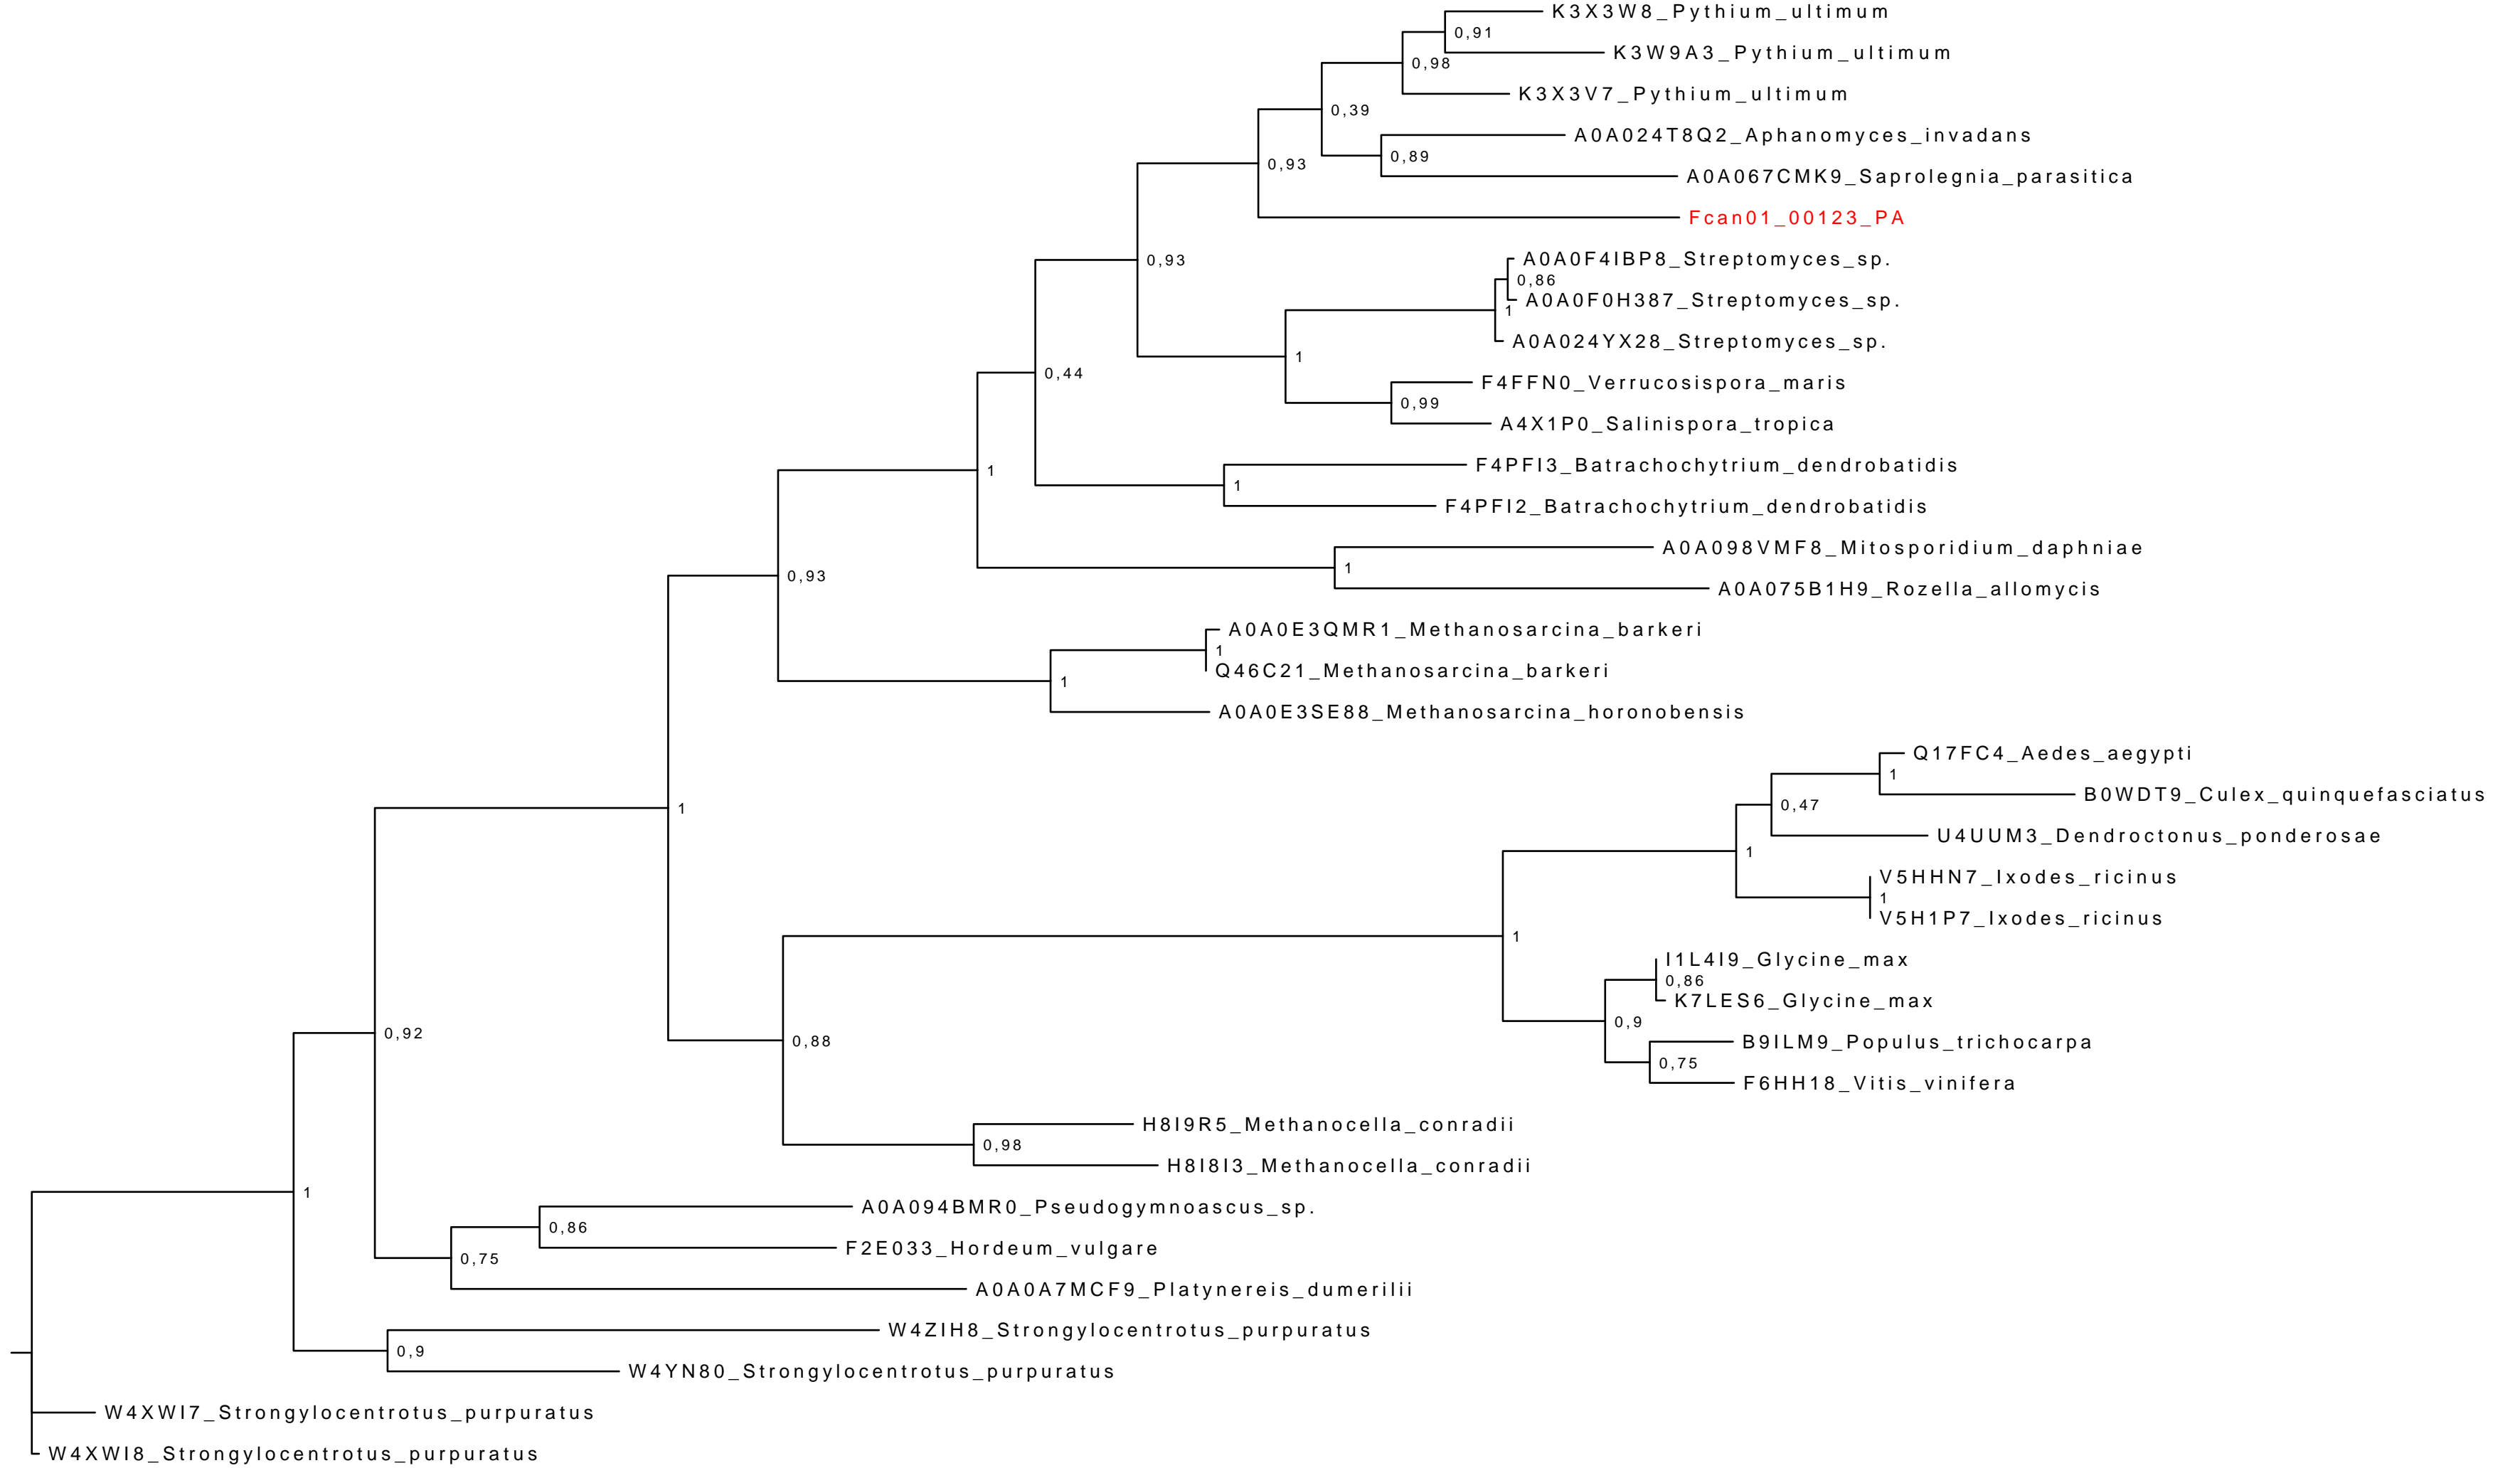

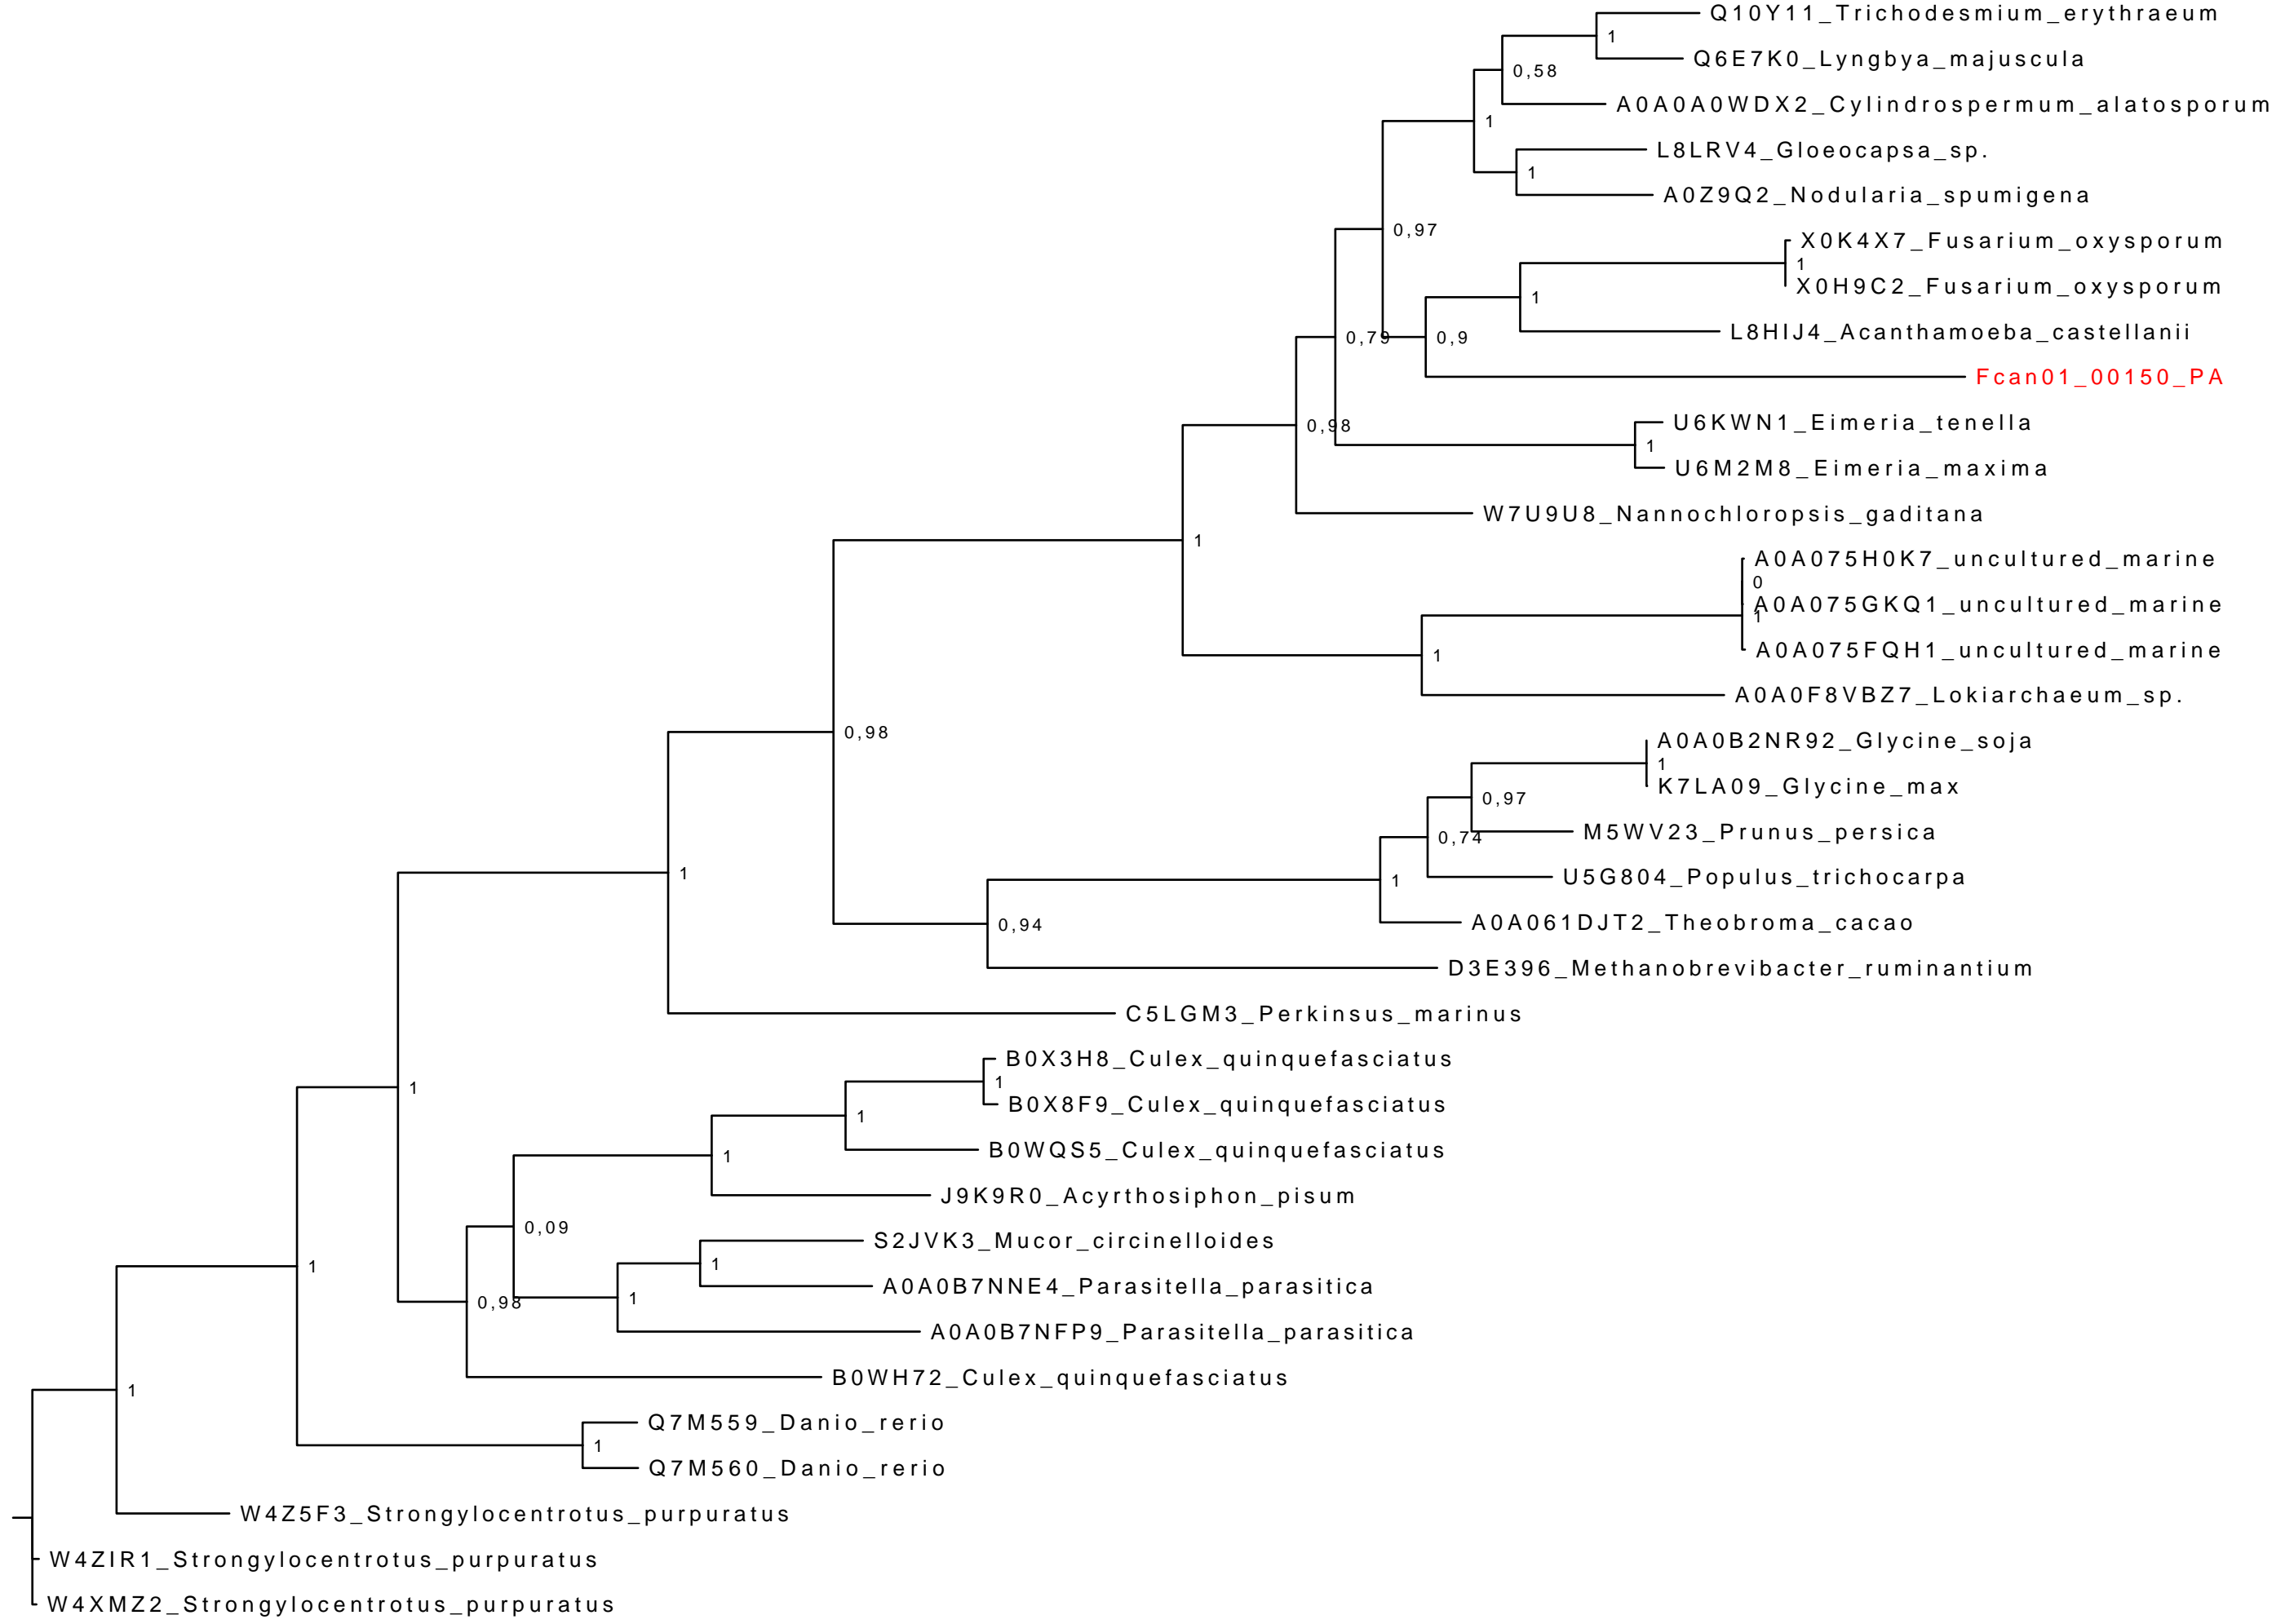

0.7

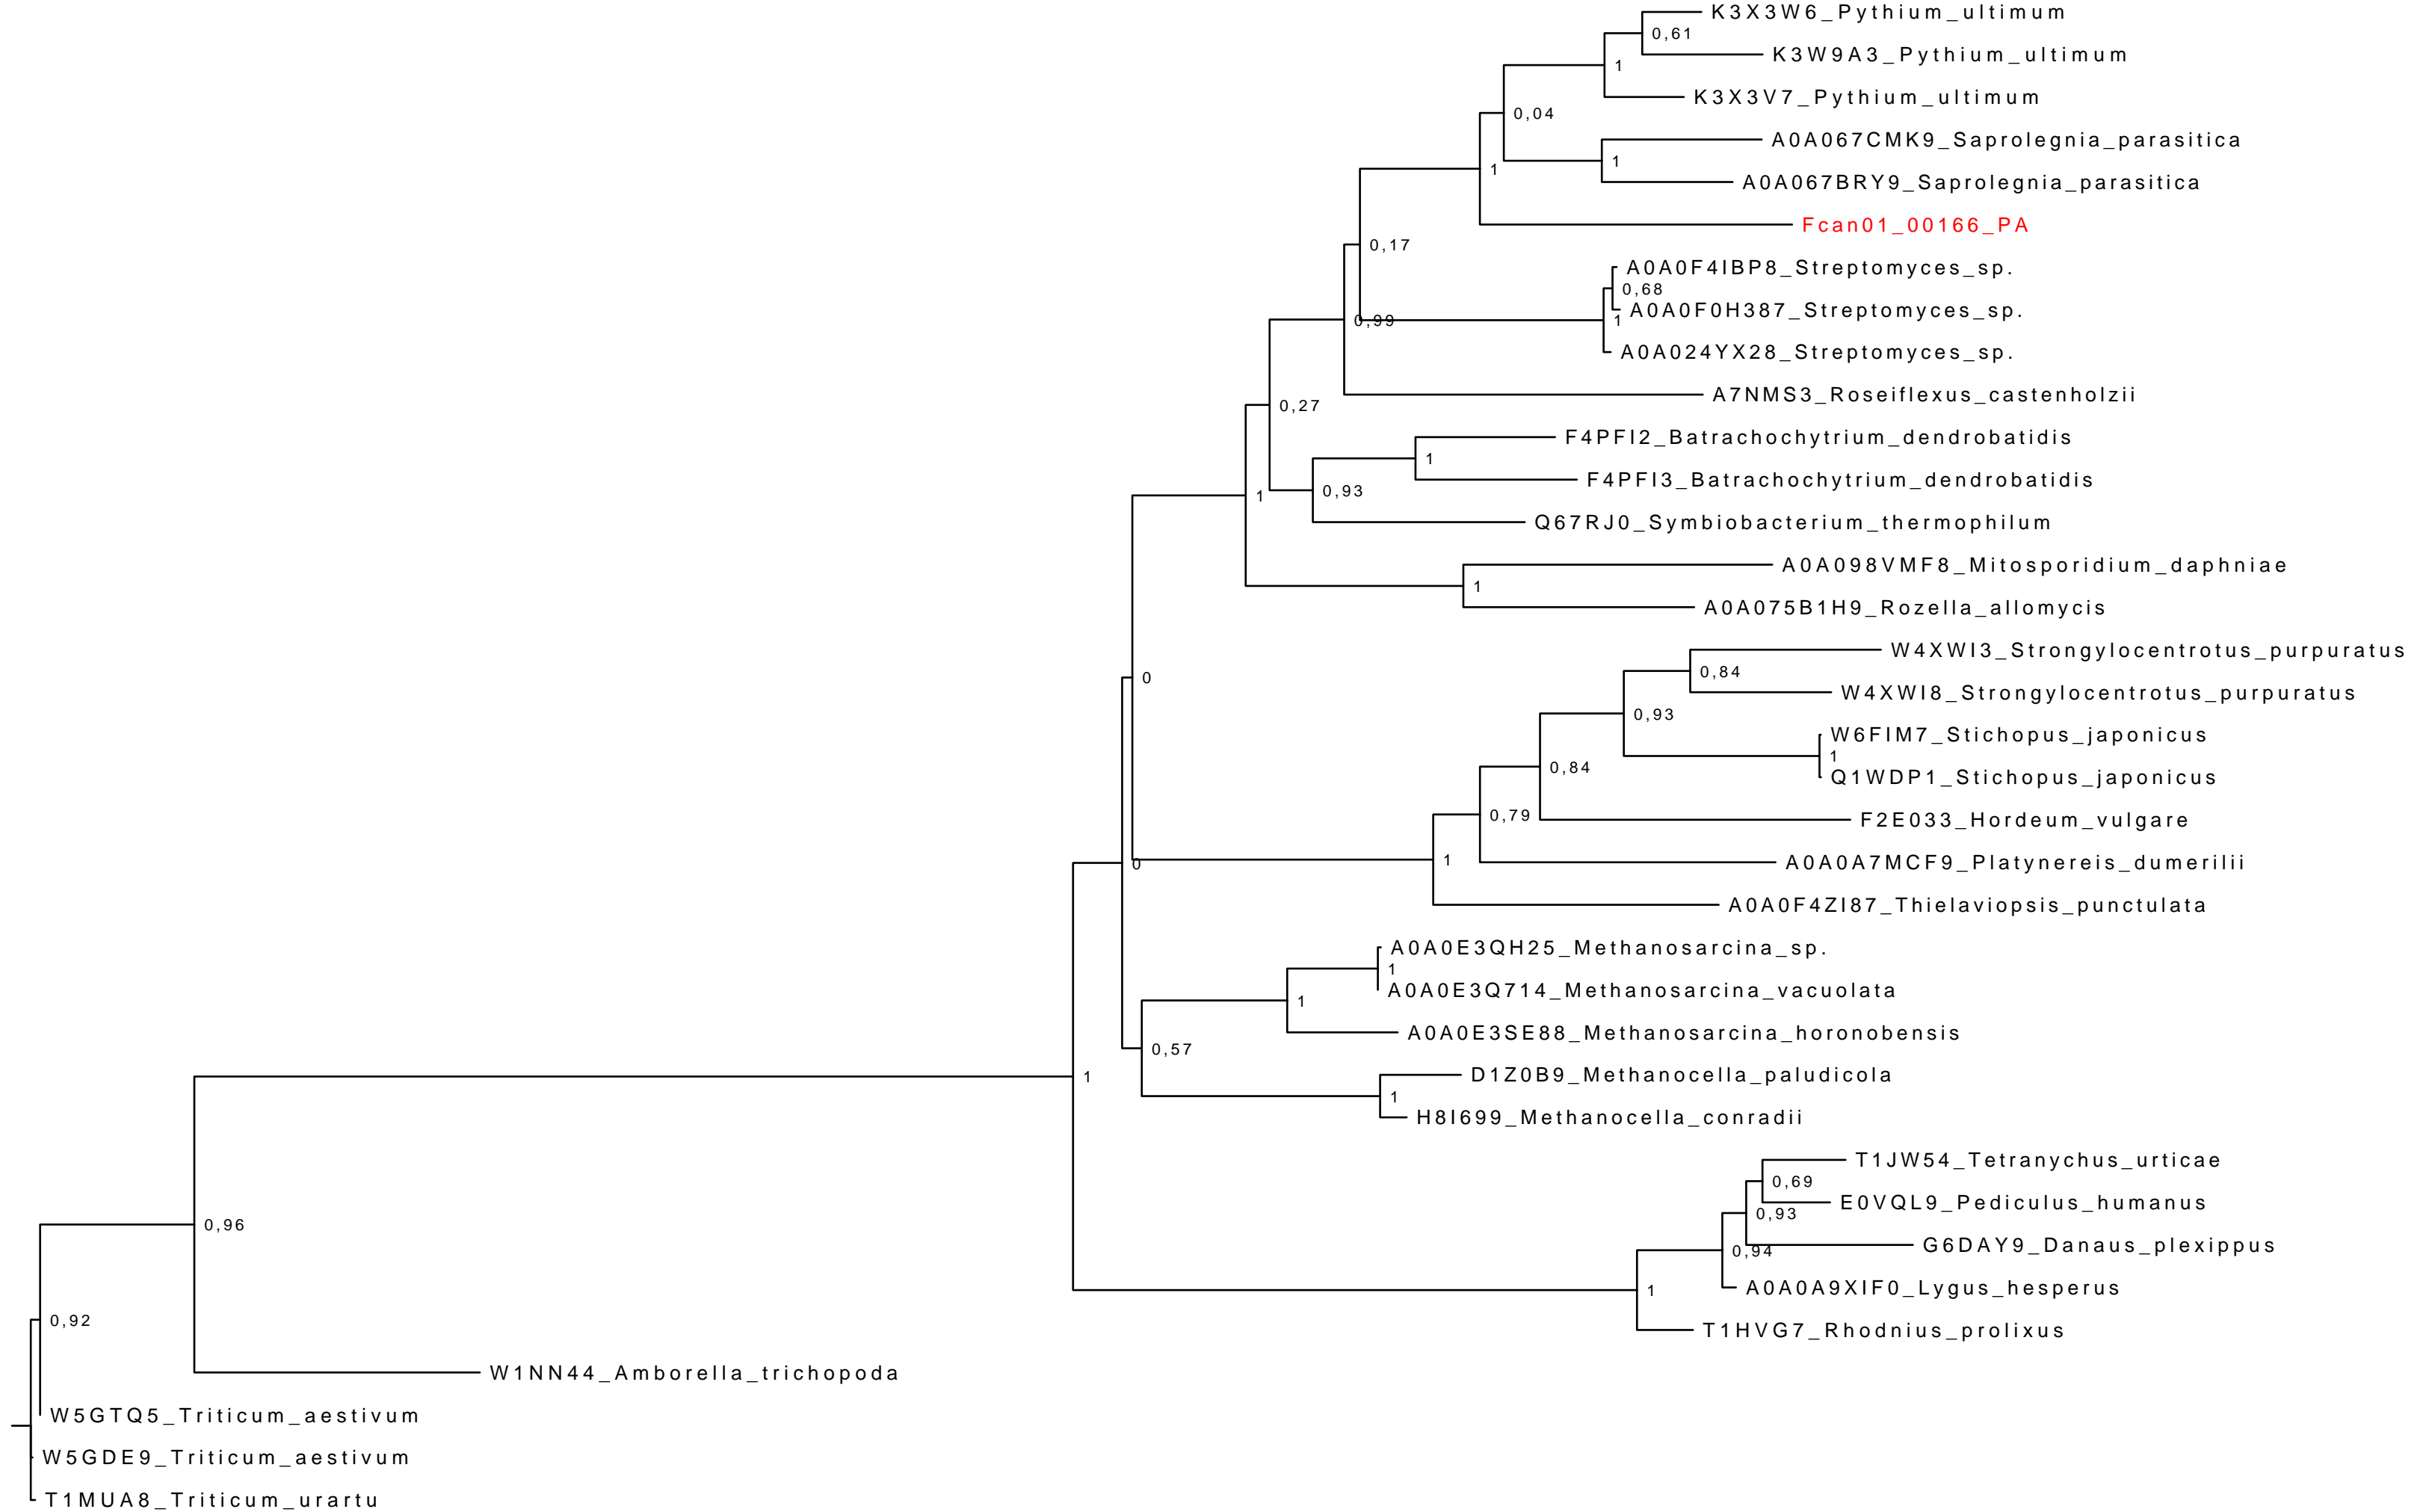

0.7

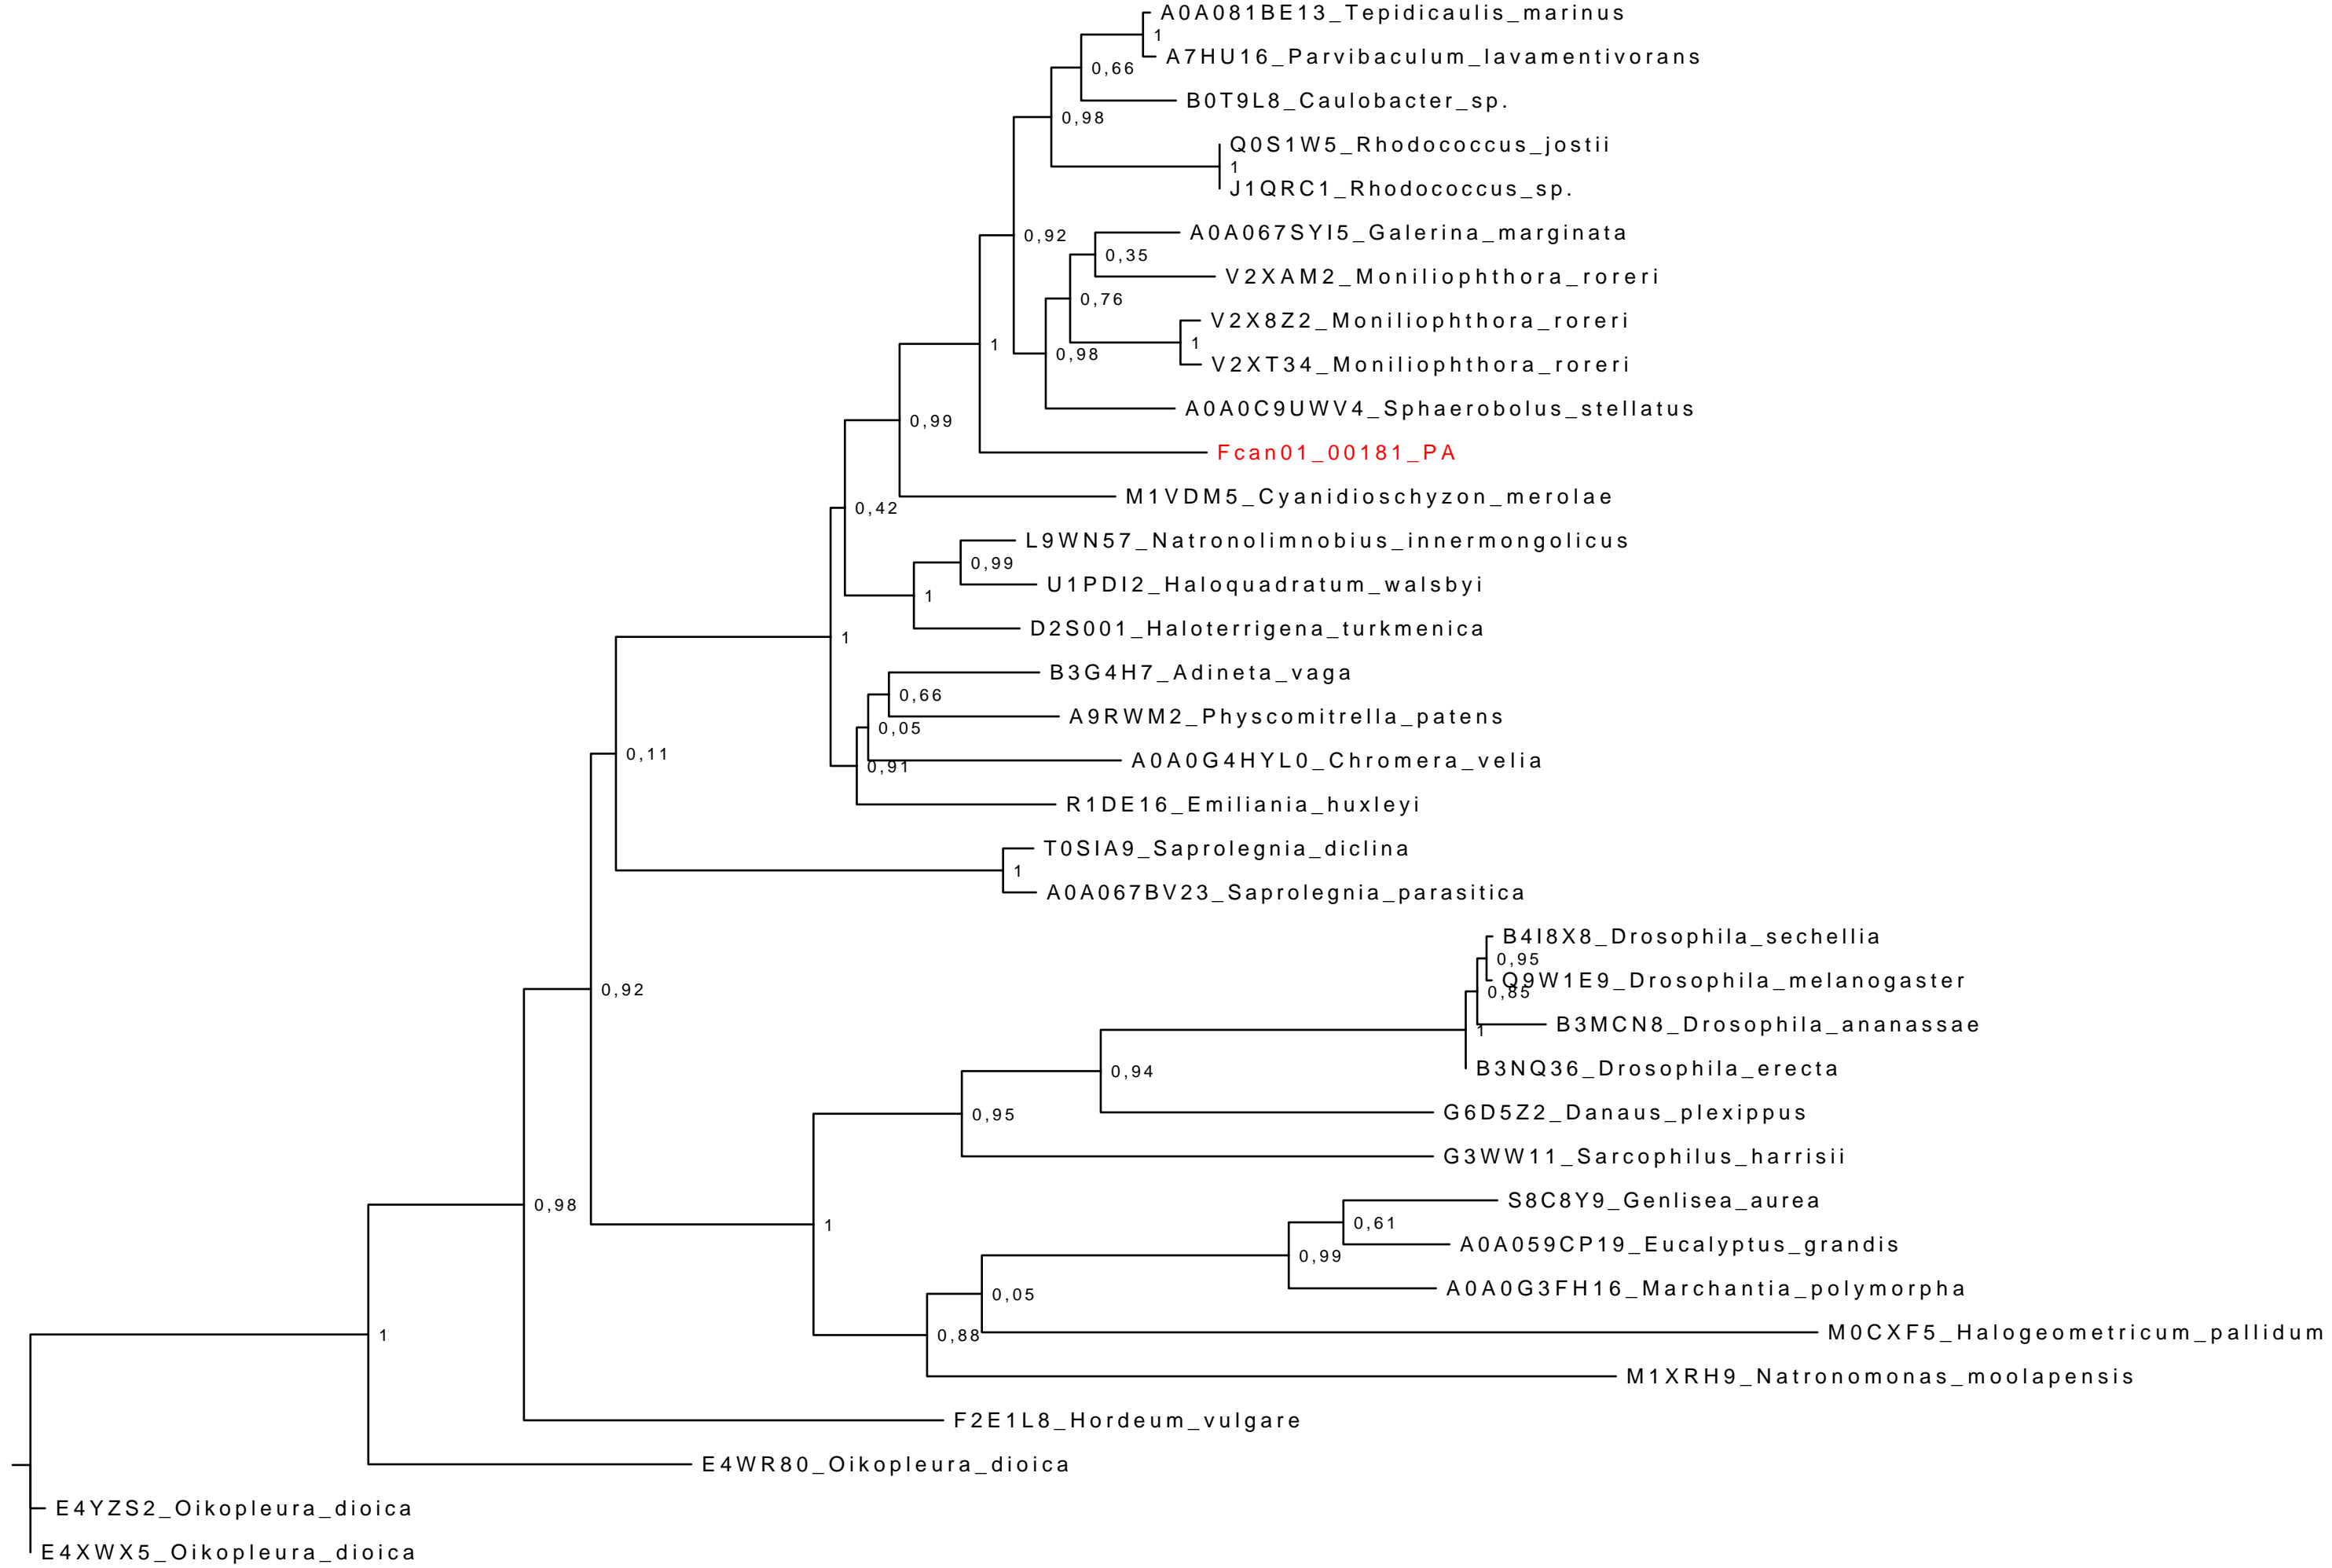

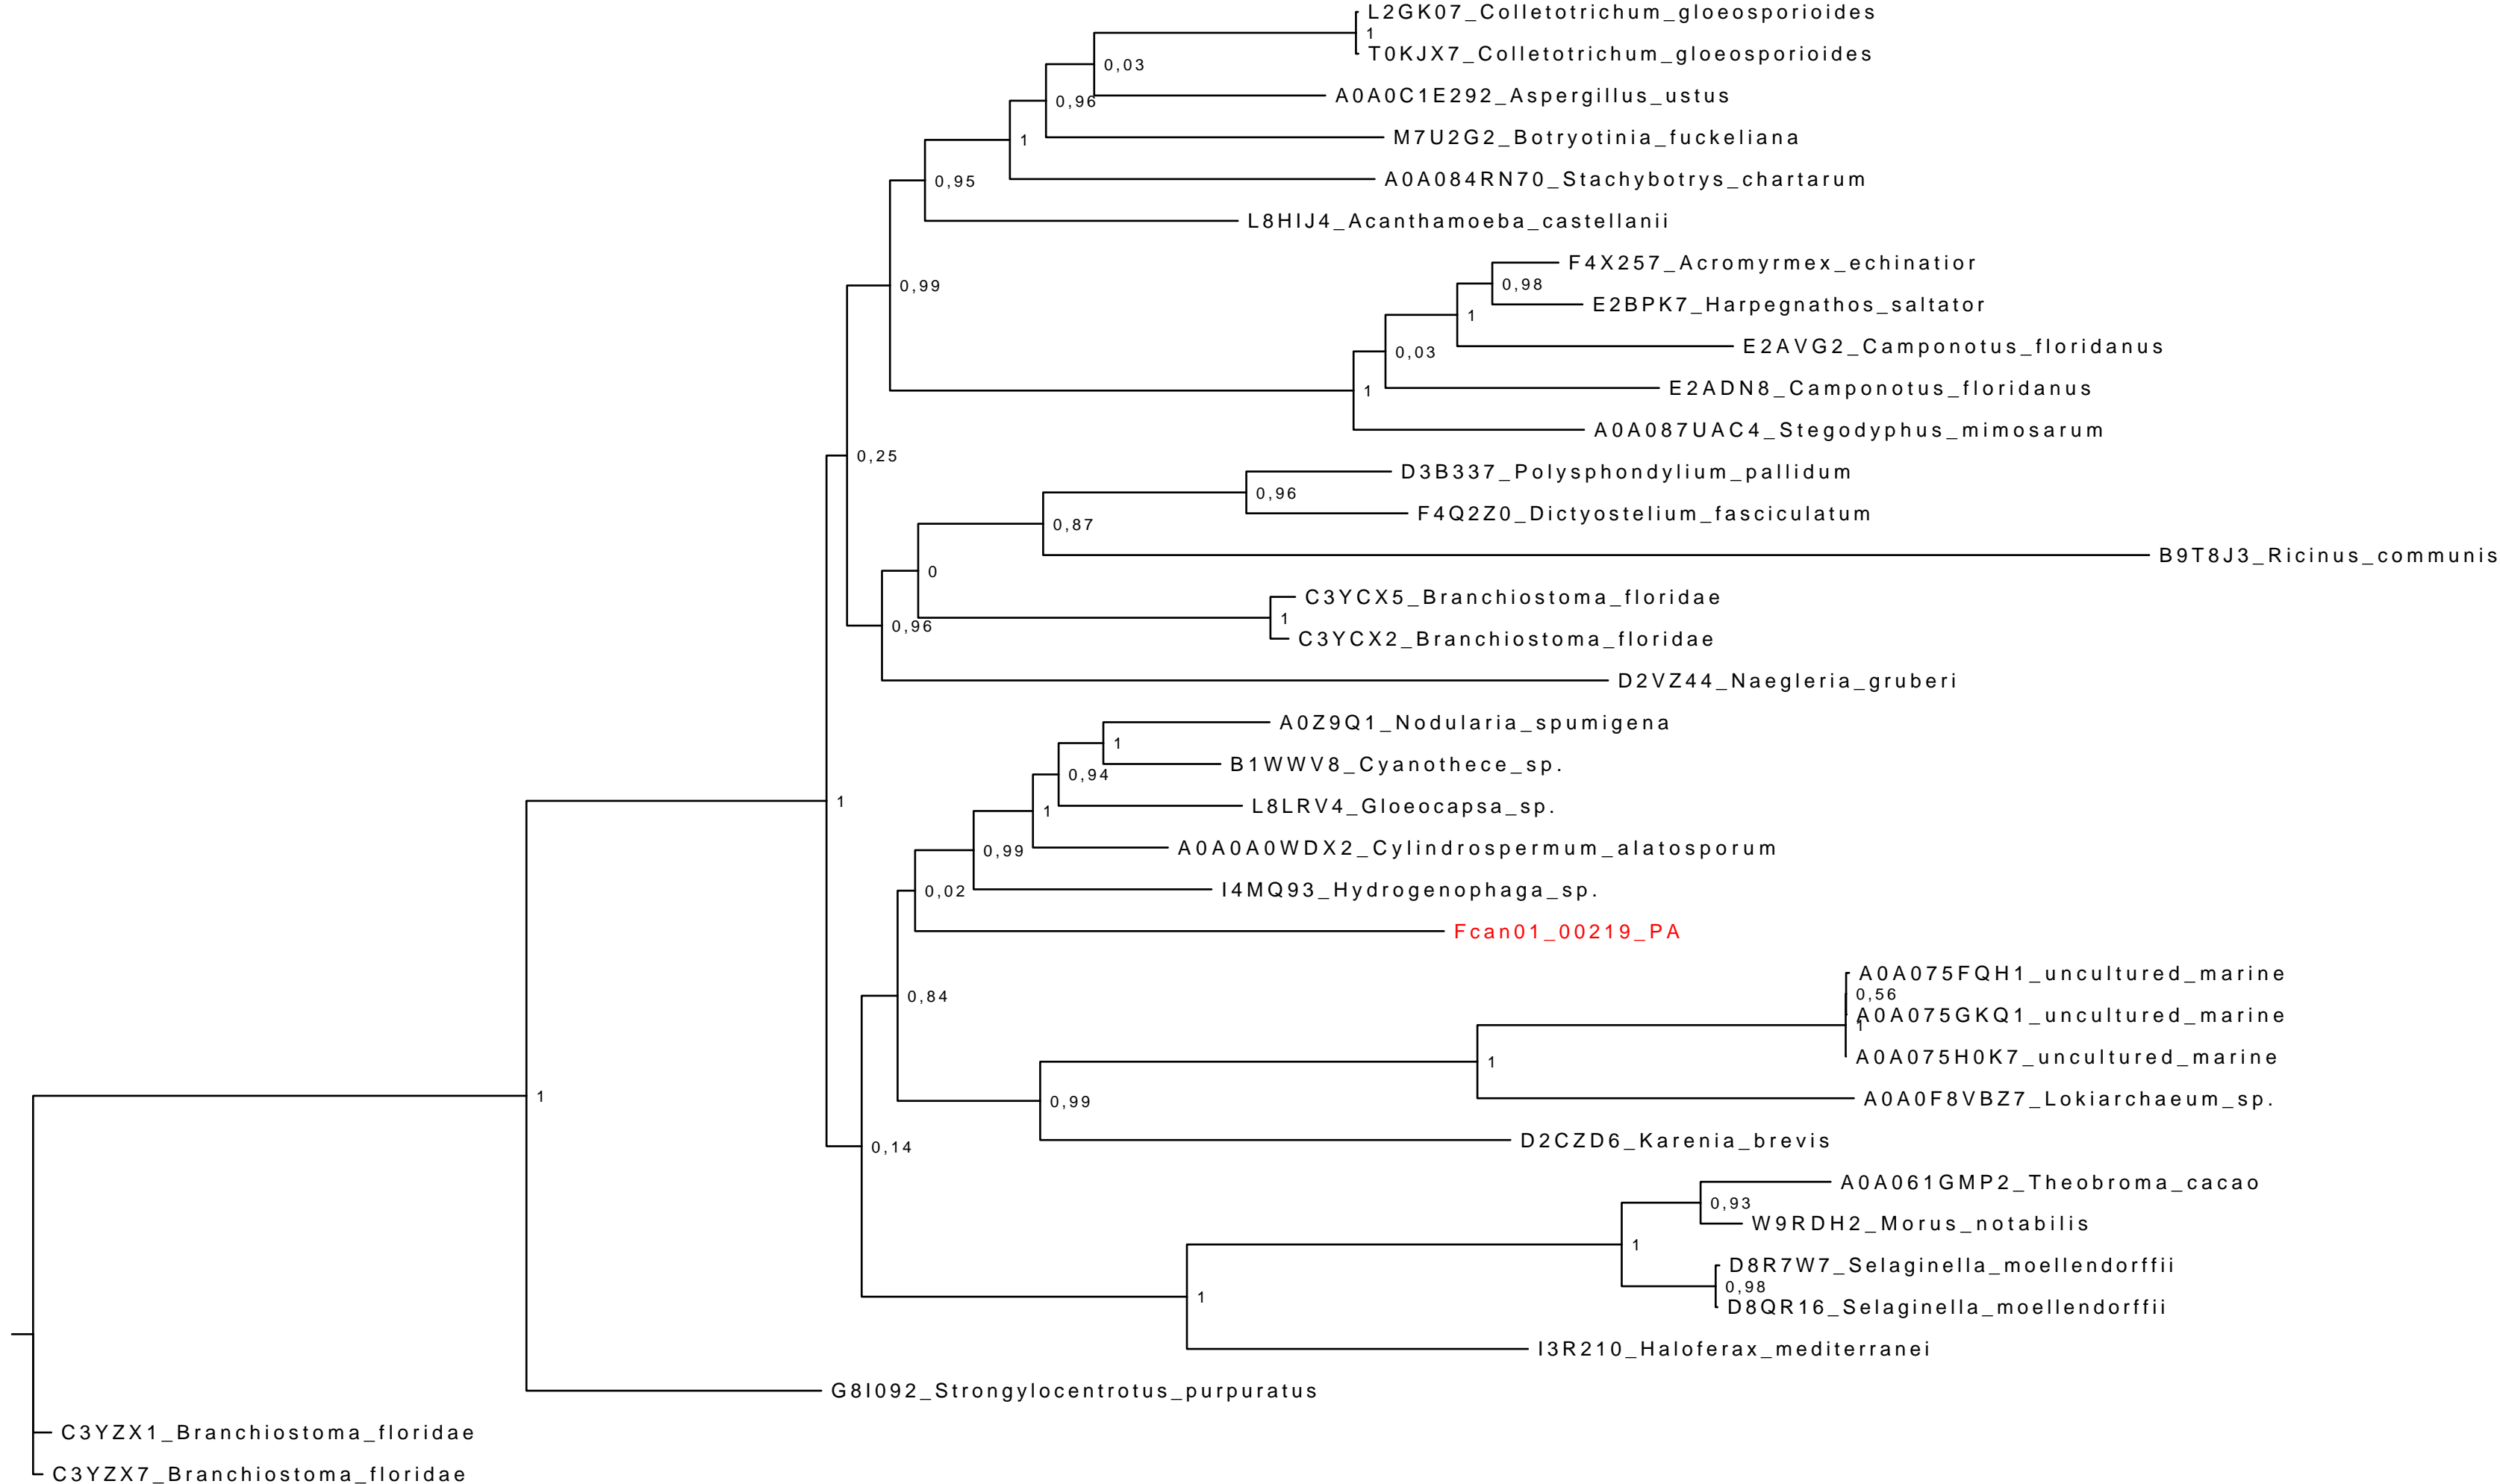

0.6

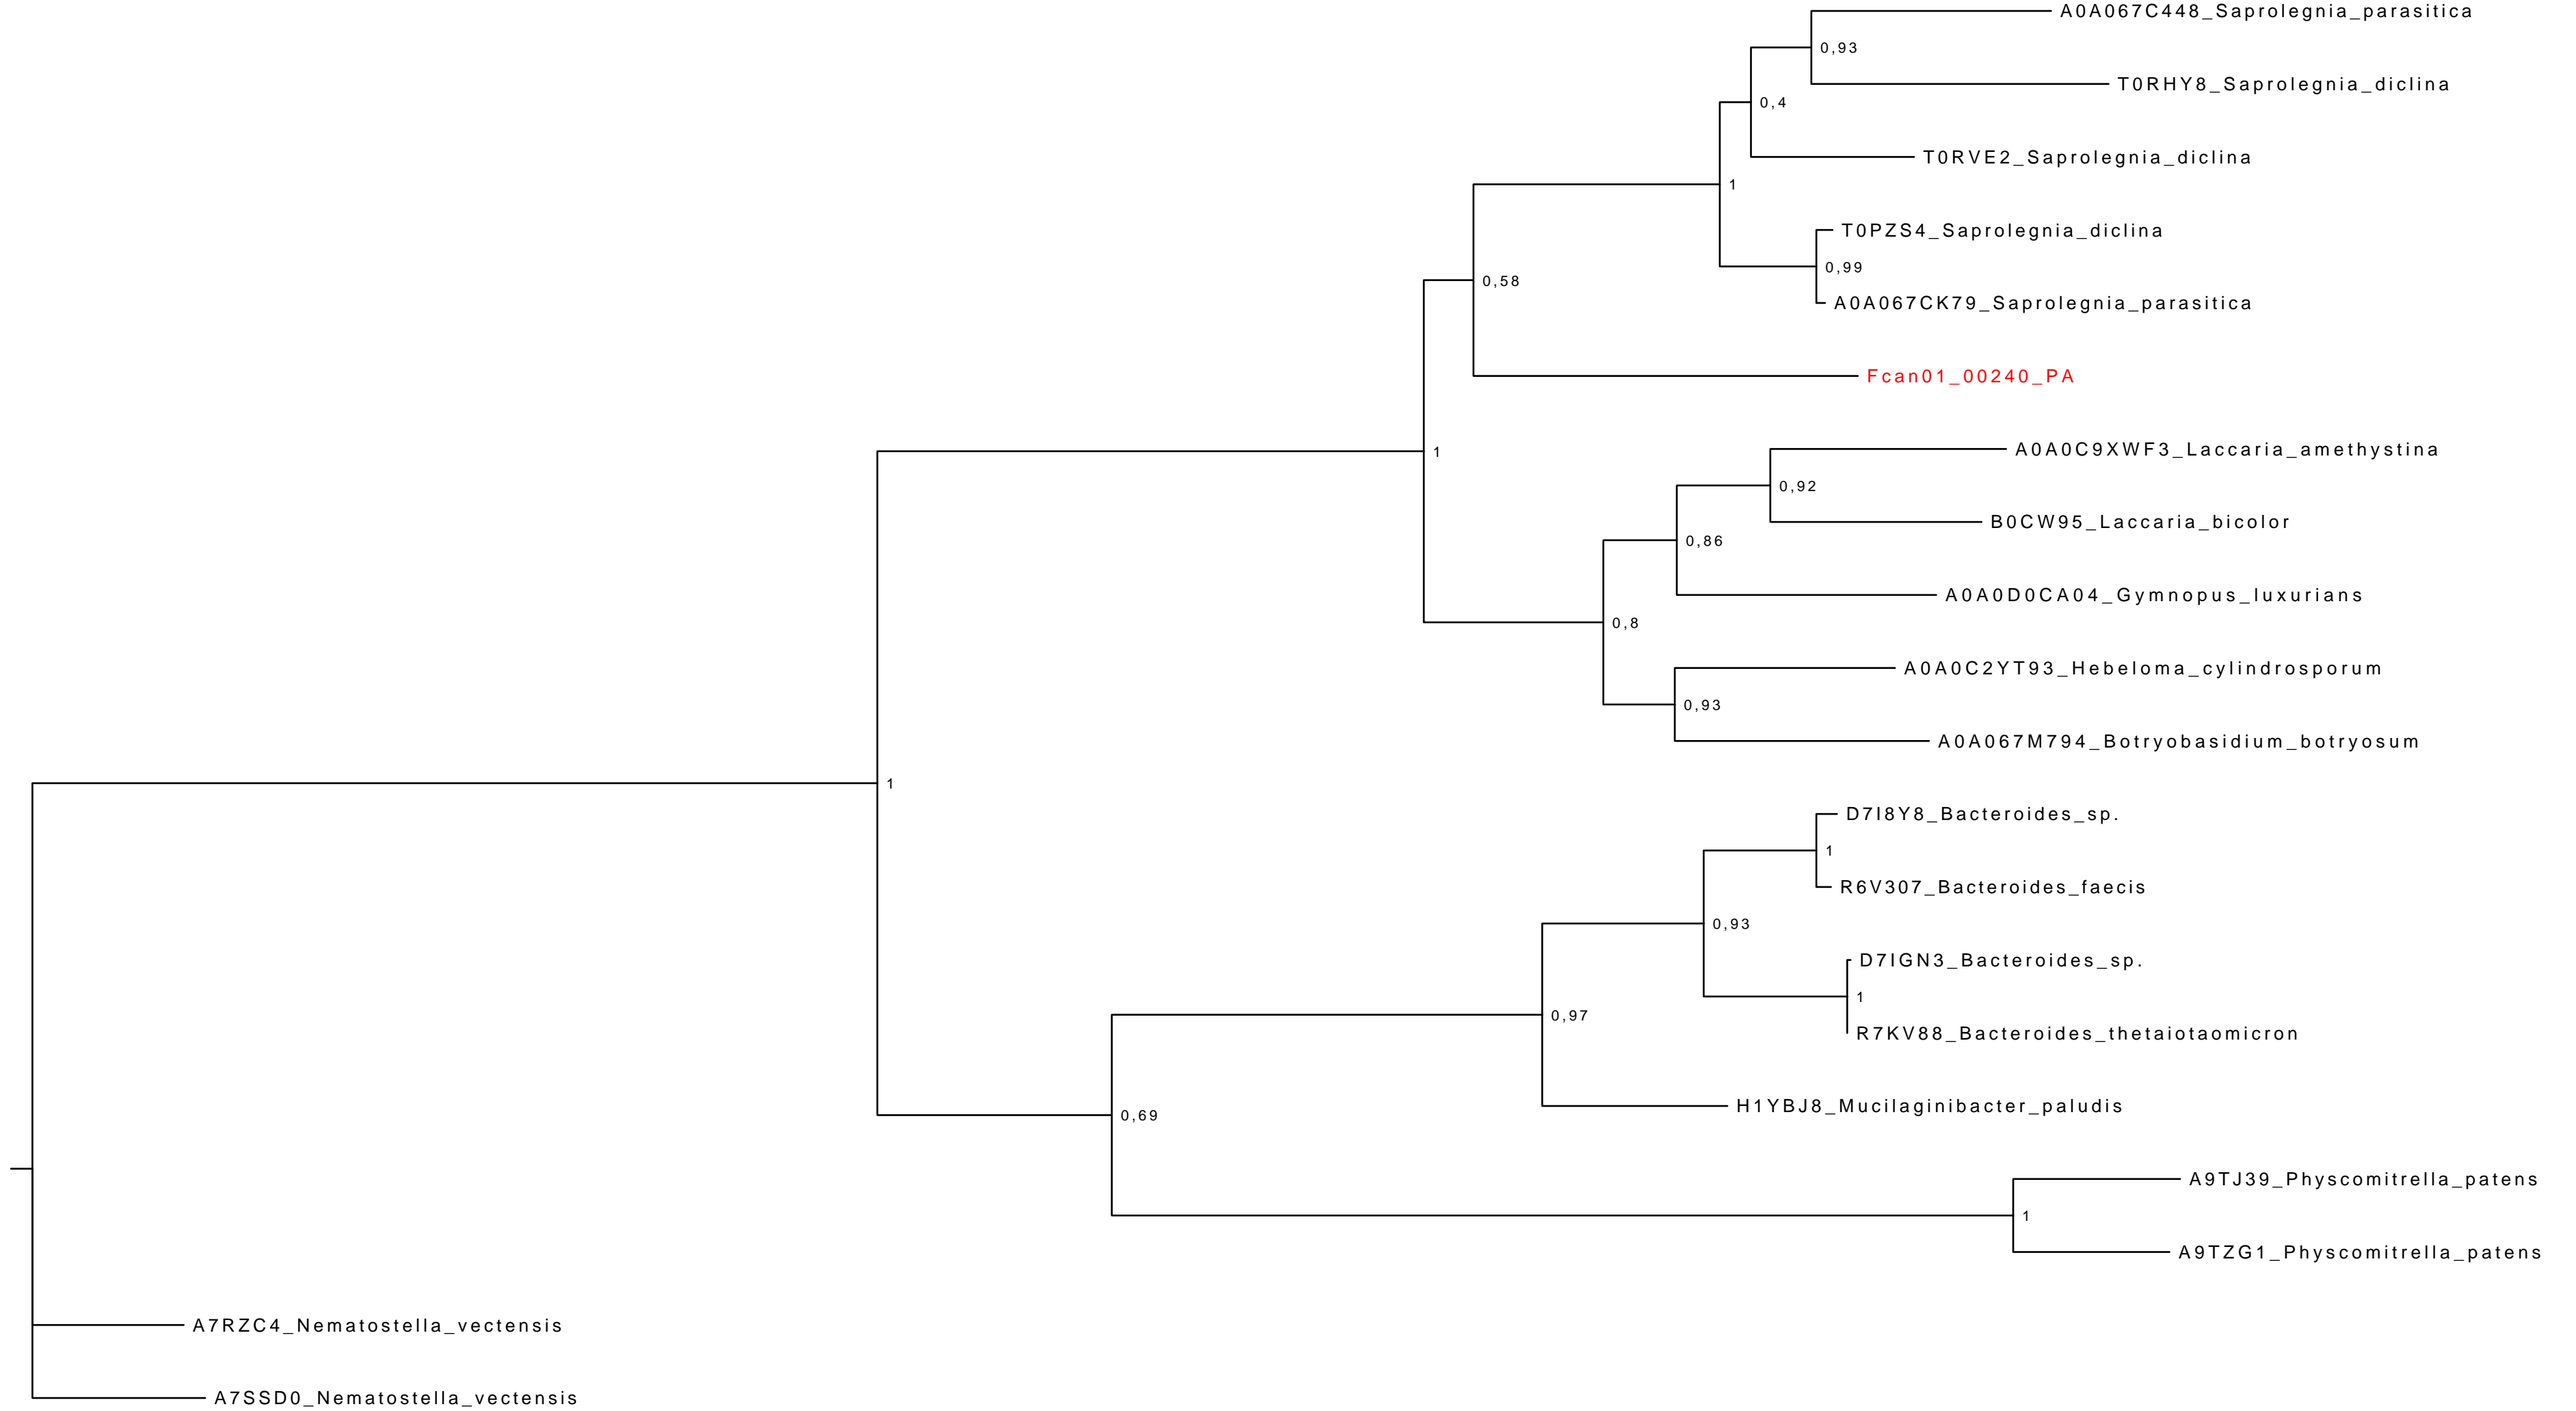

0.4



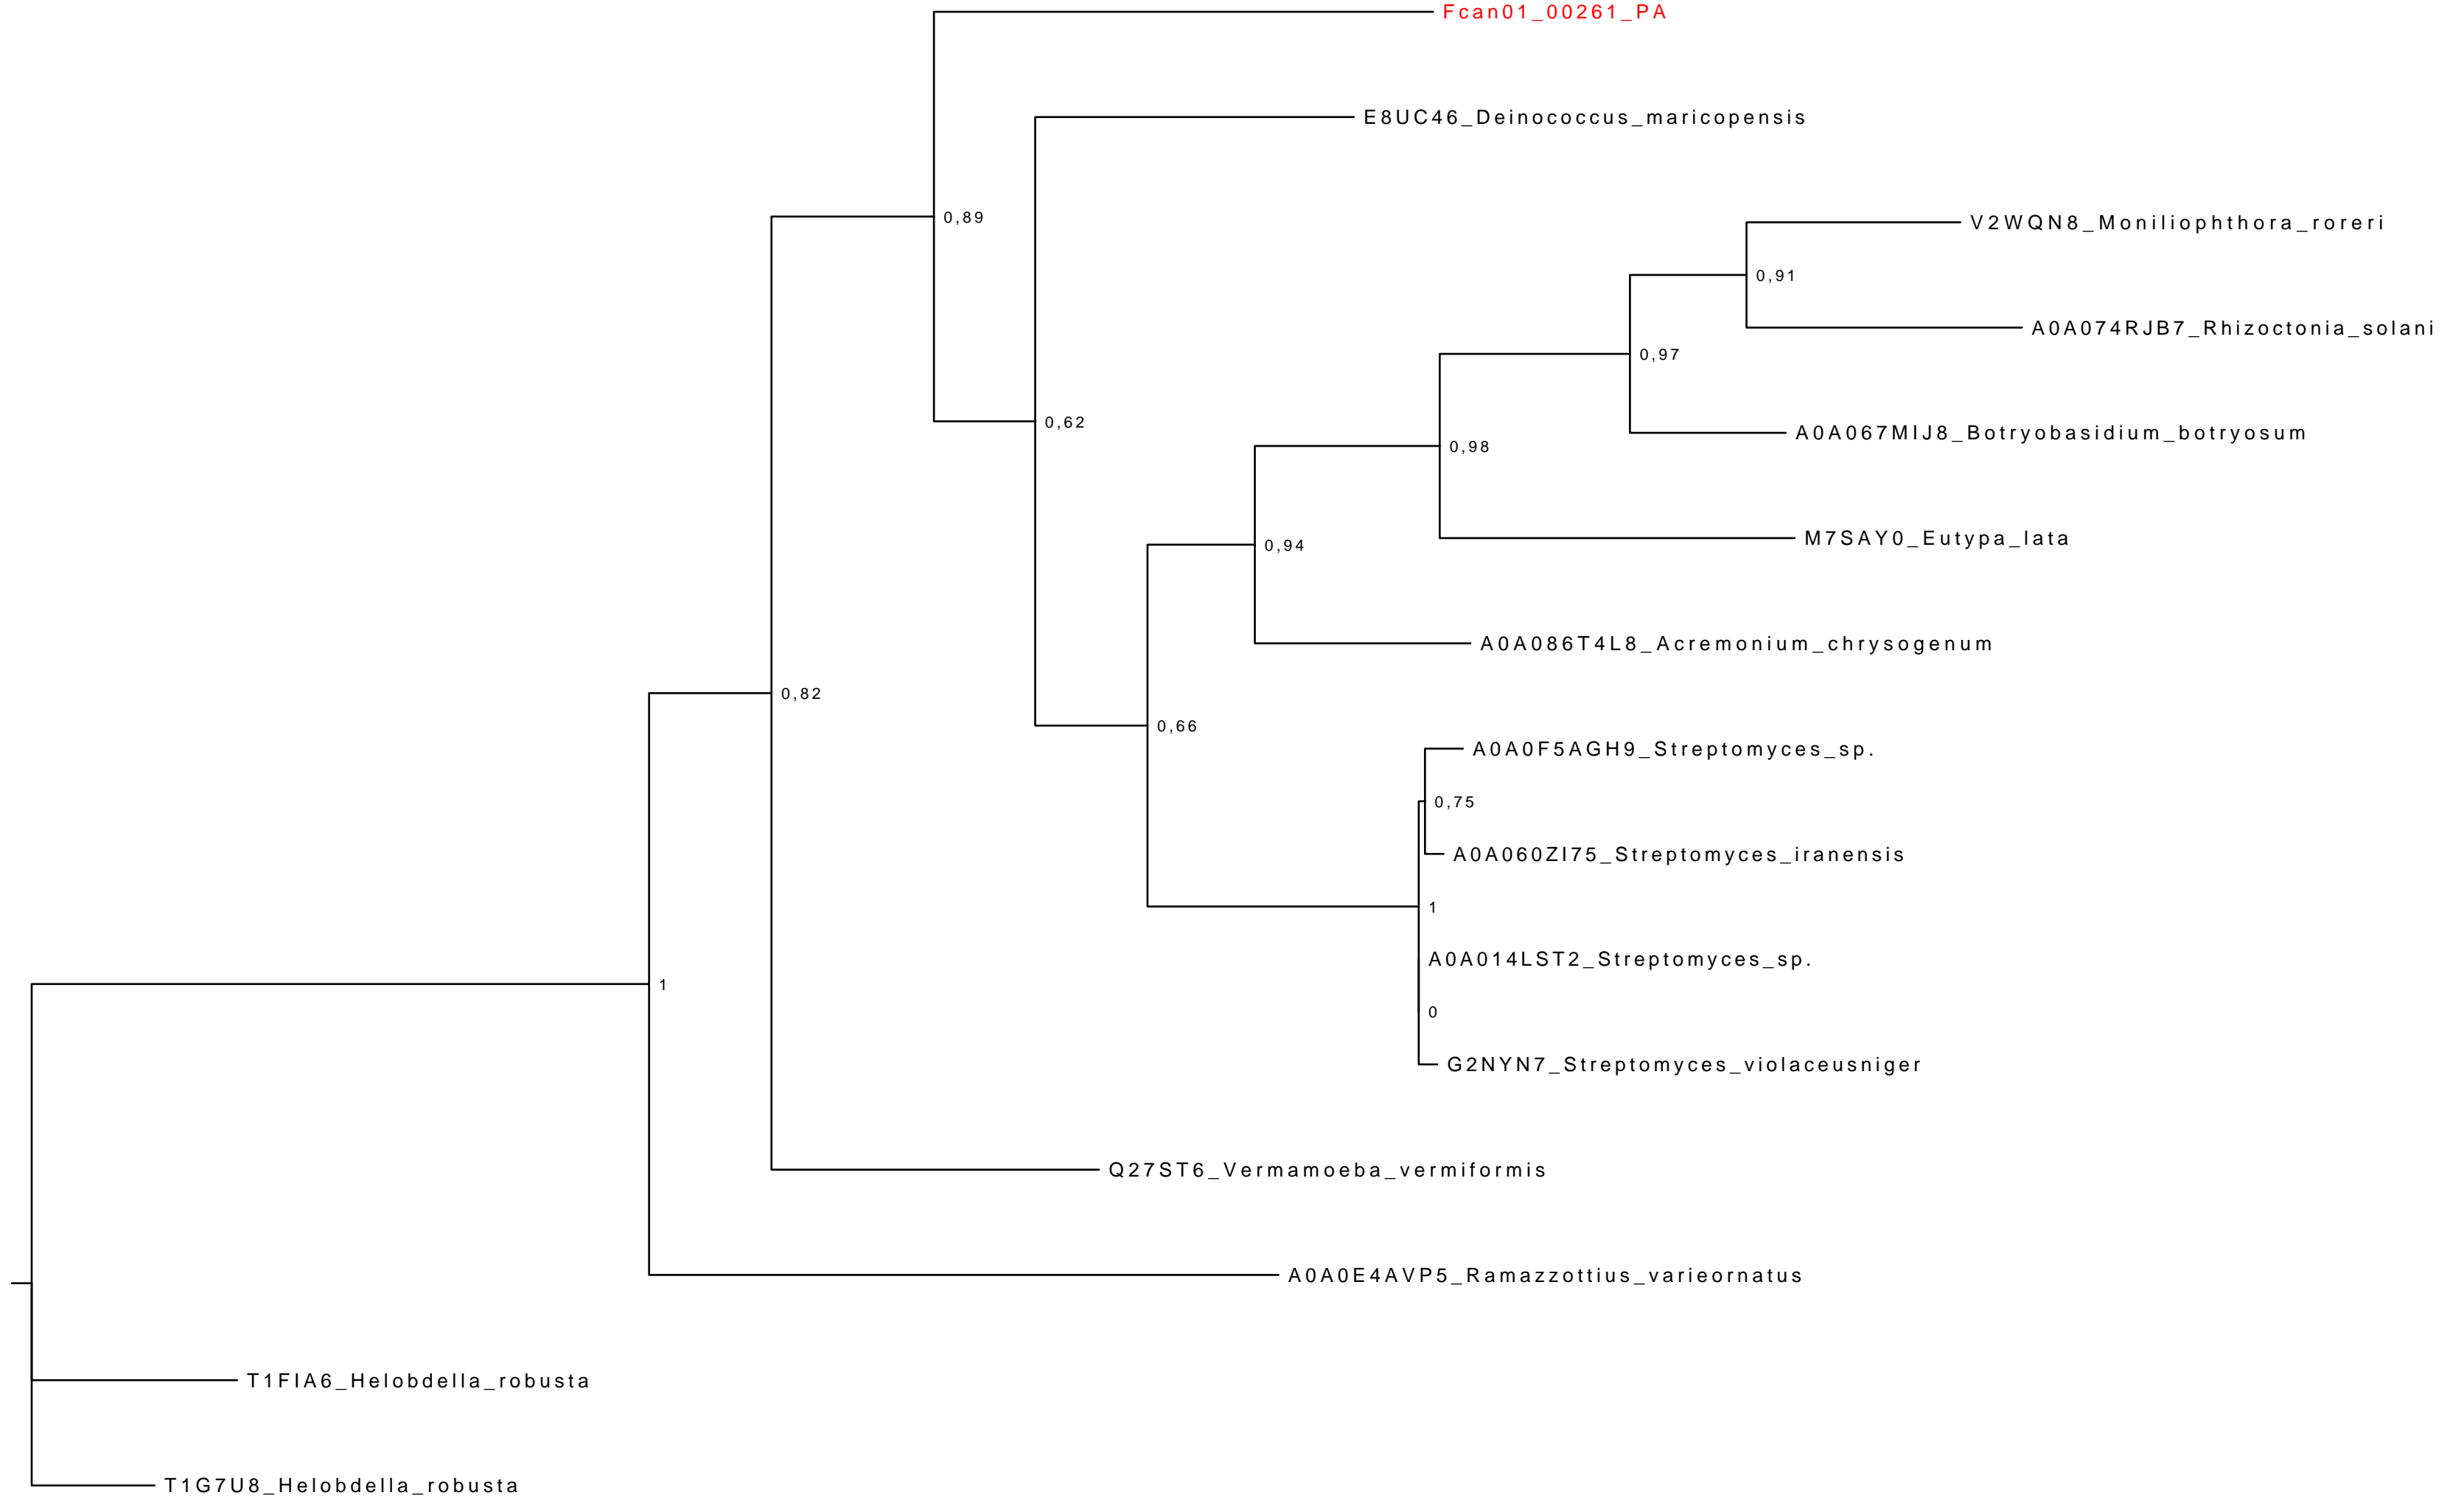

0.2

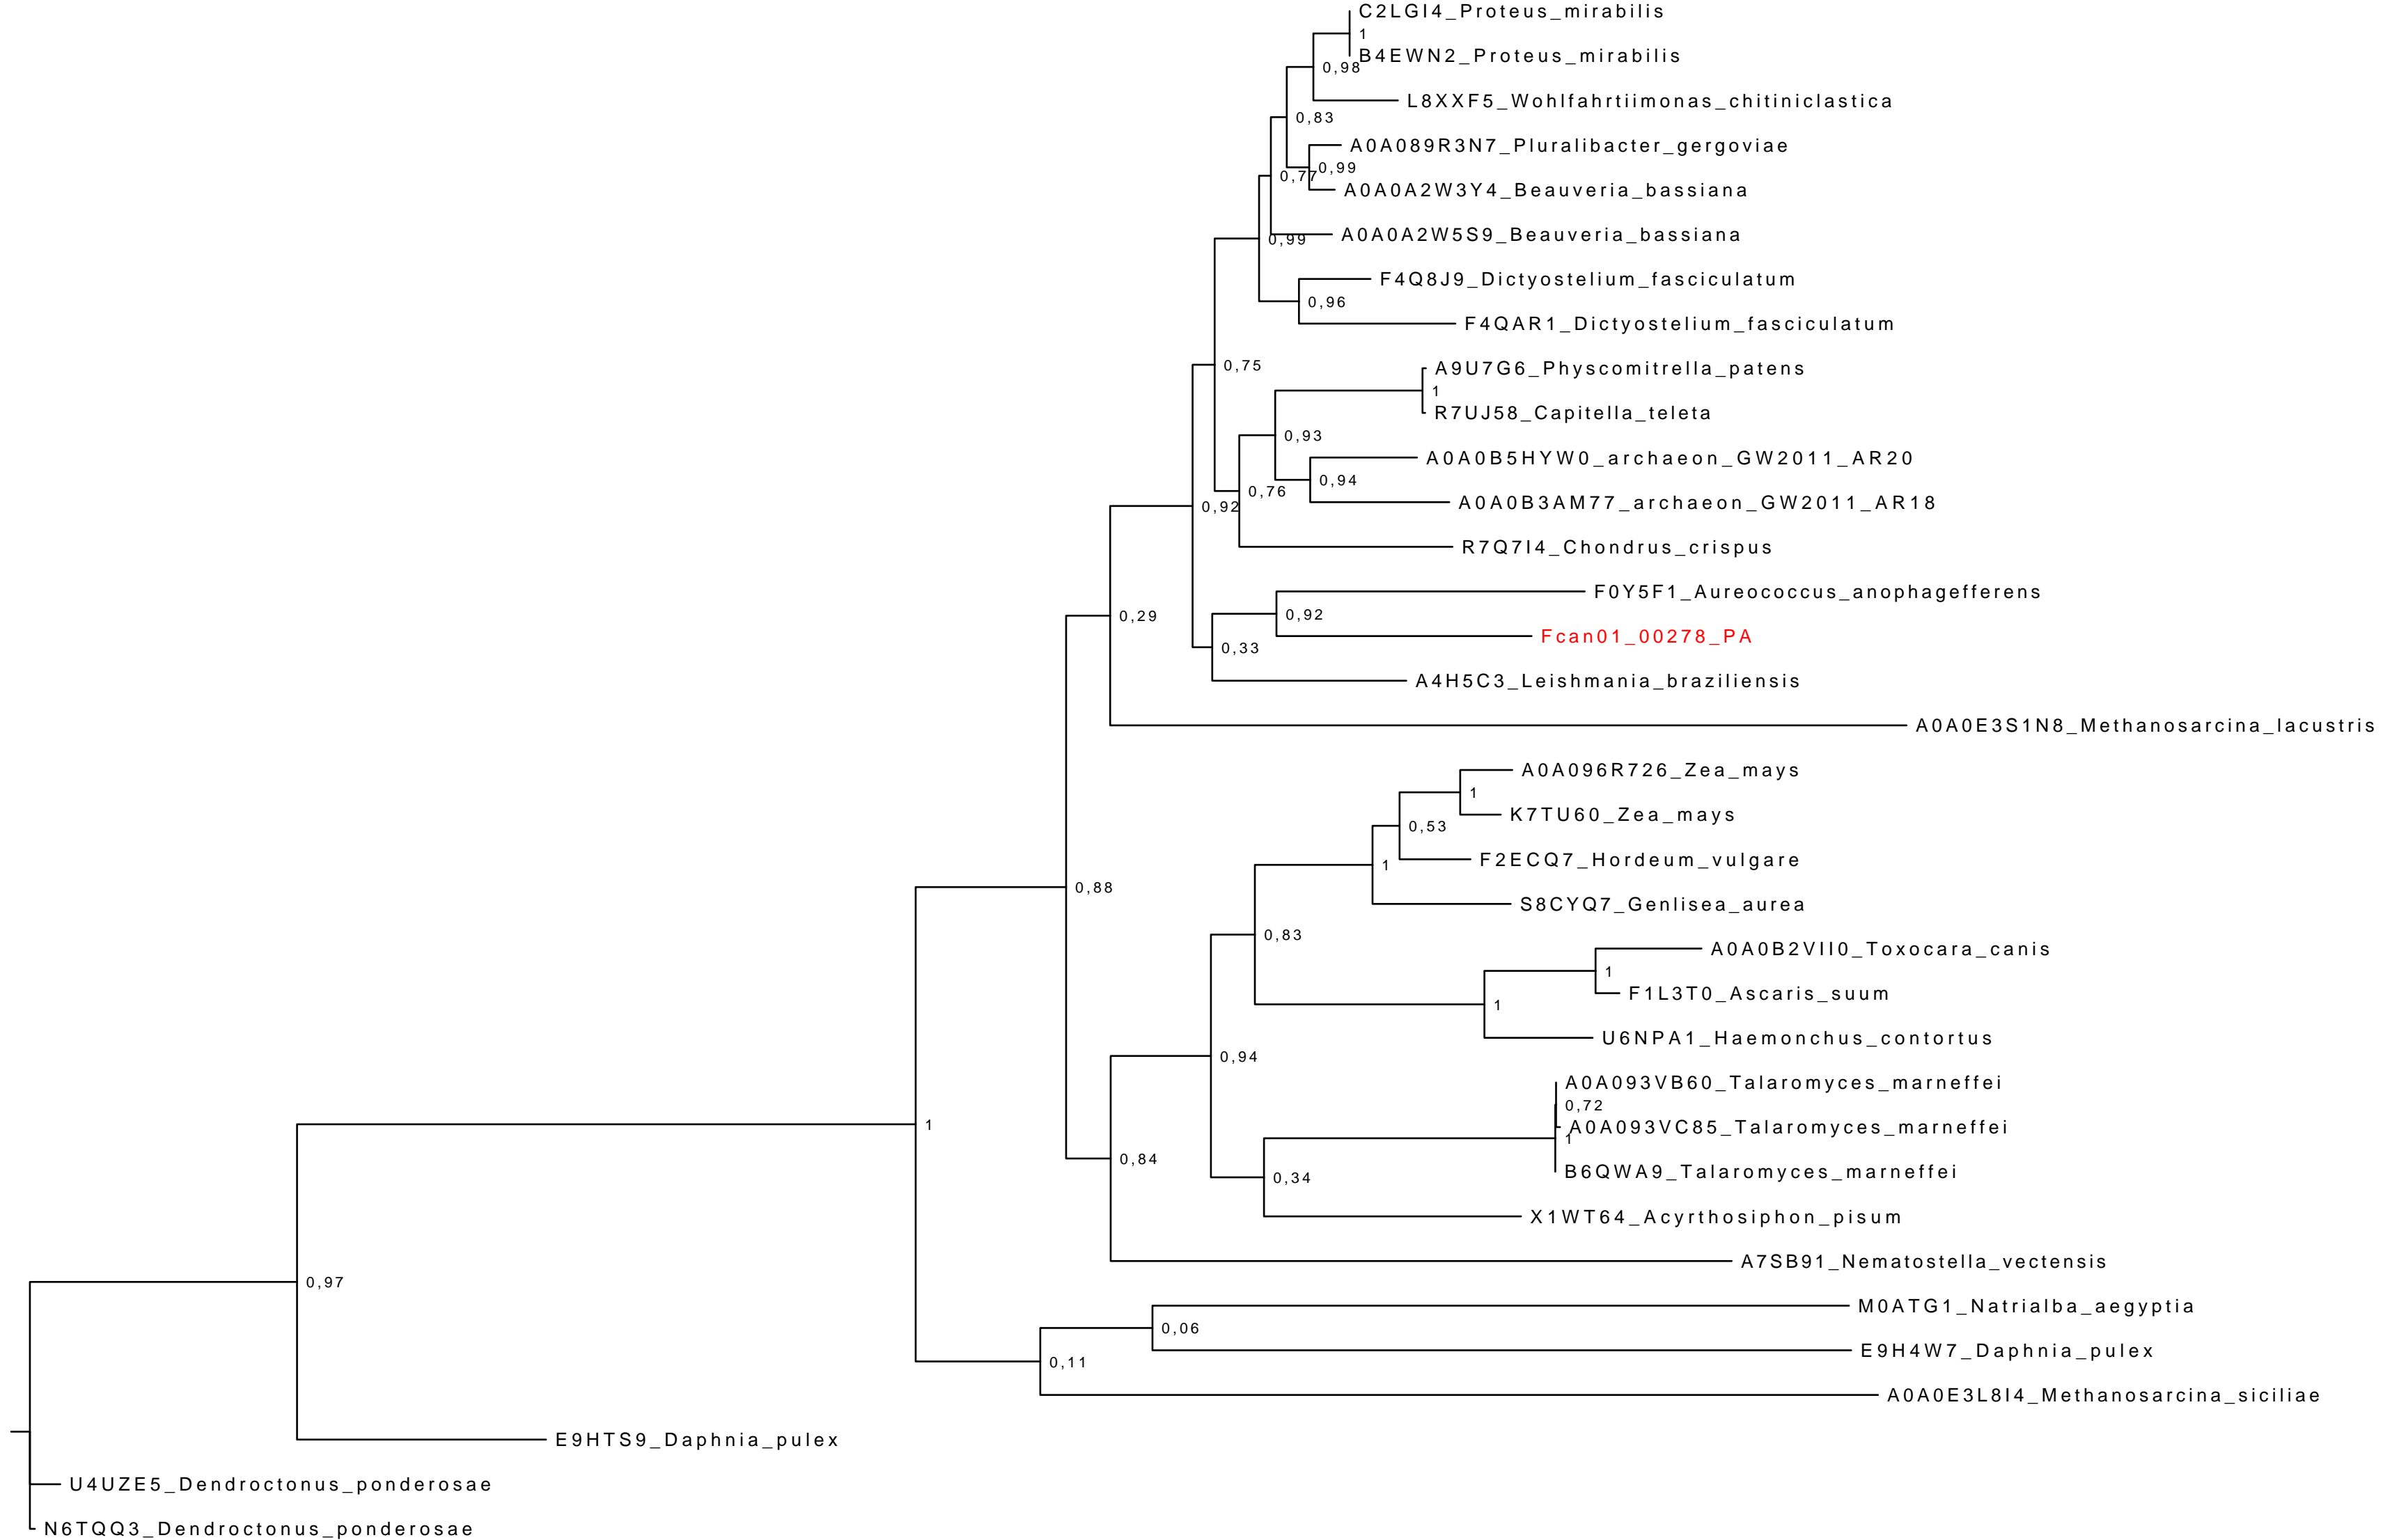

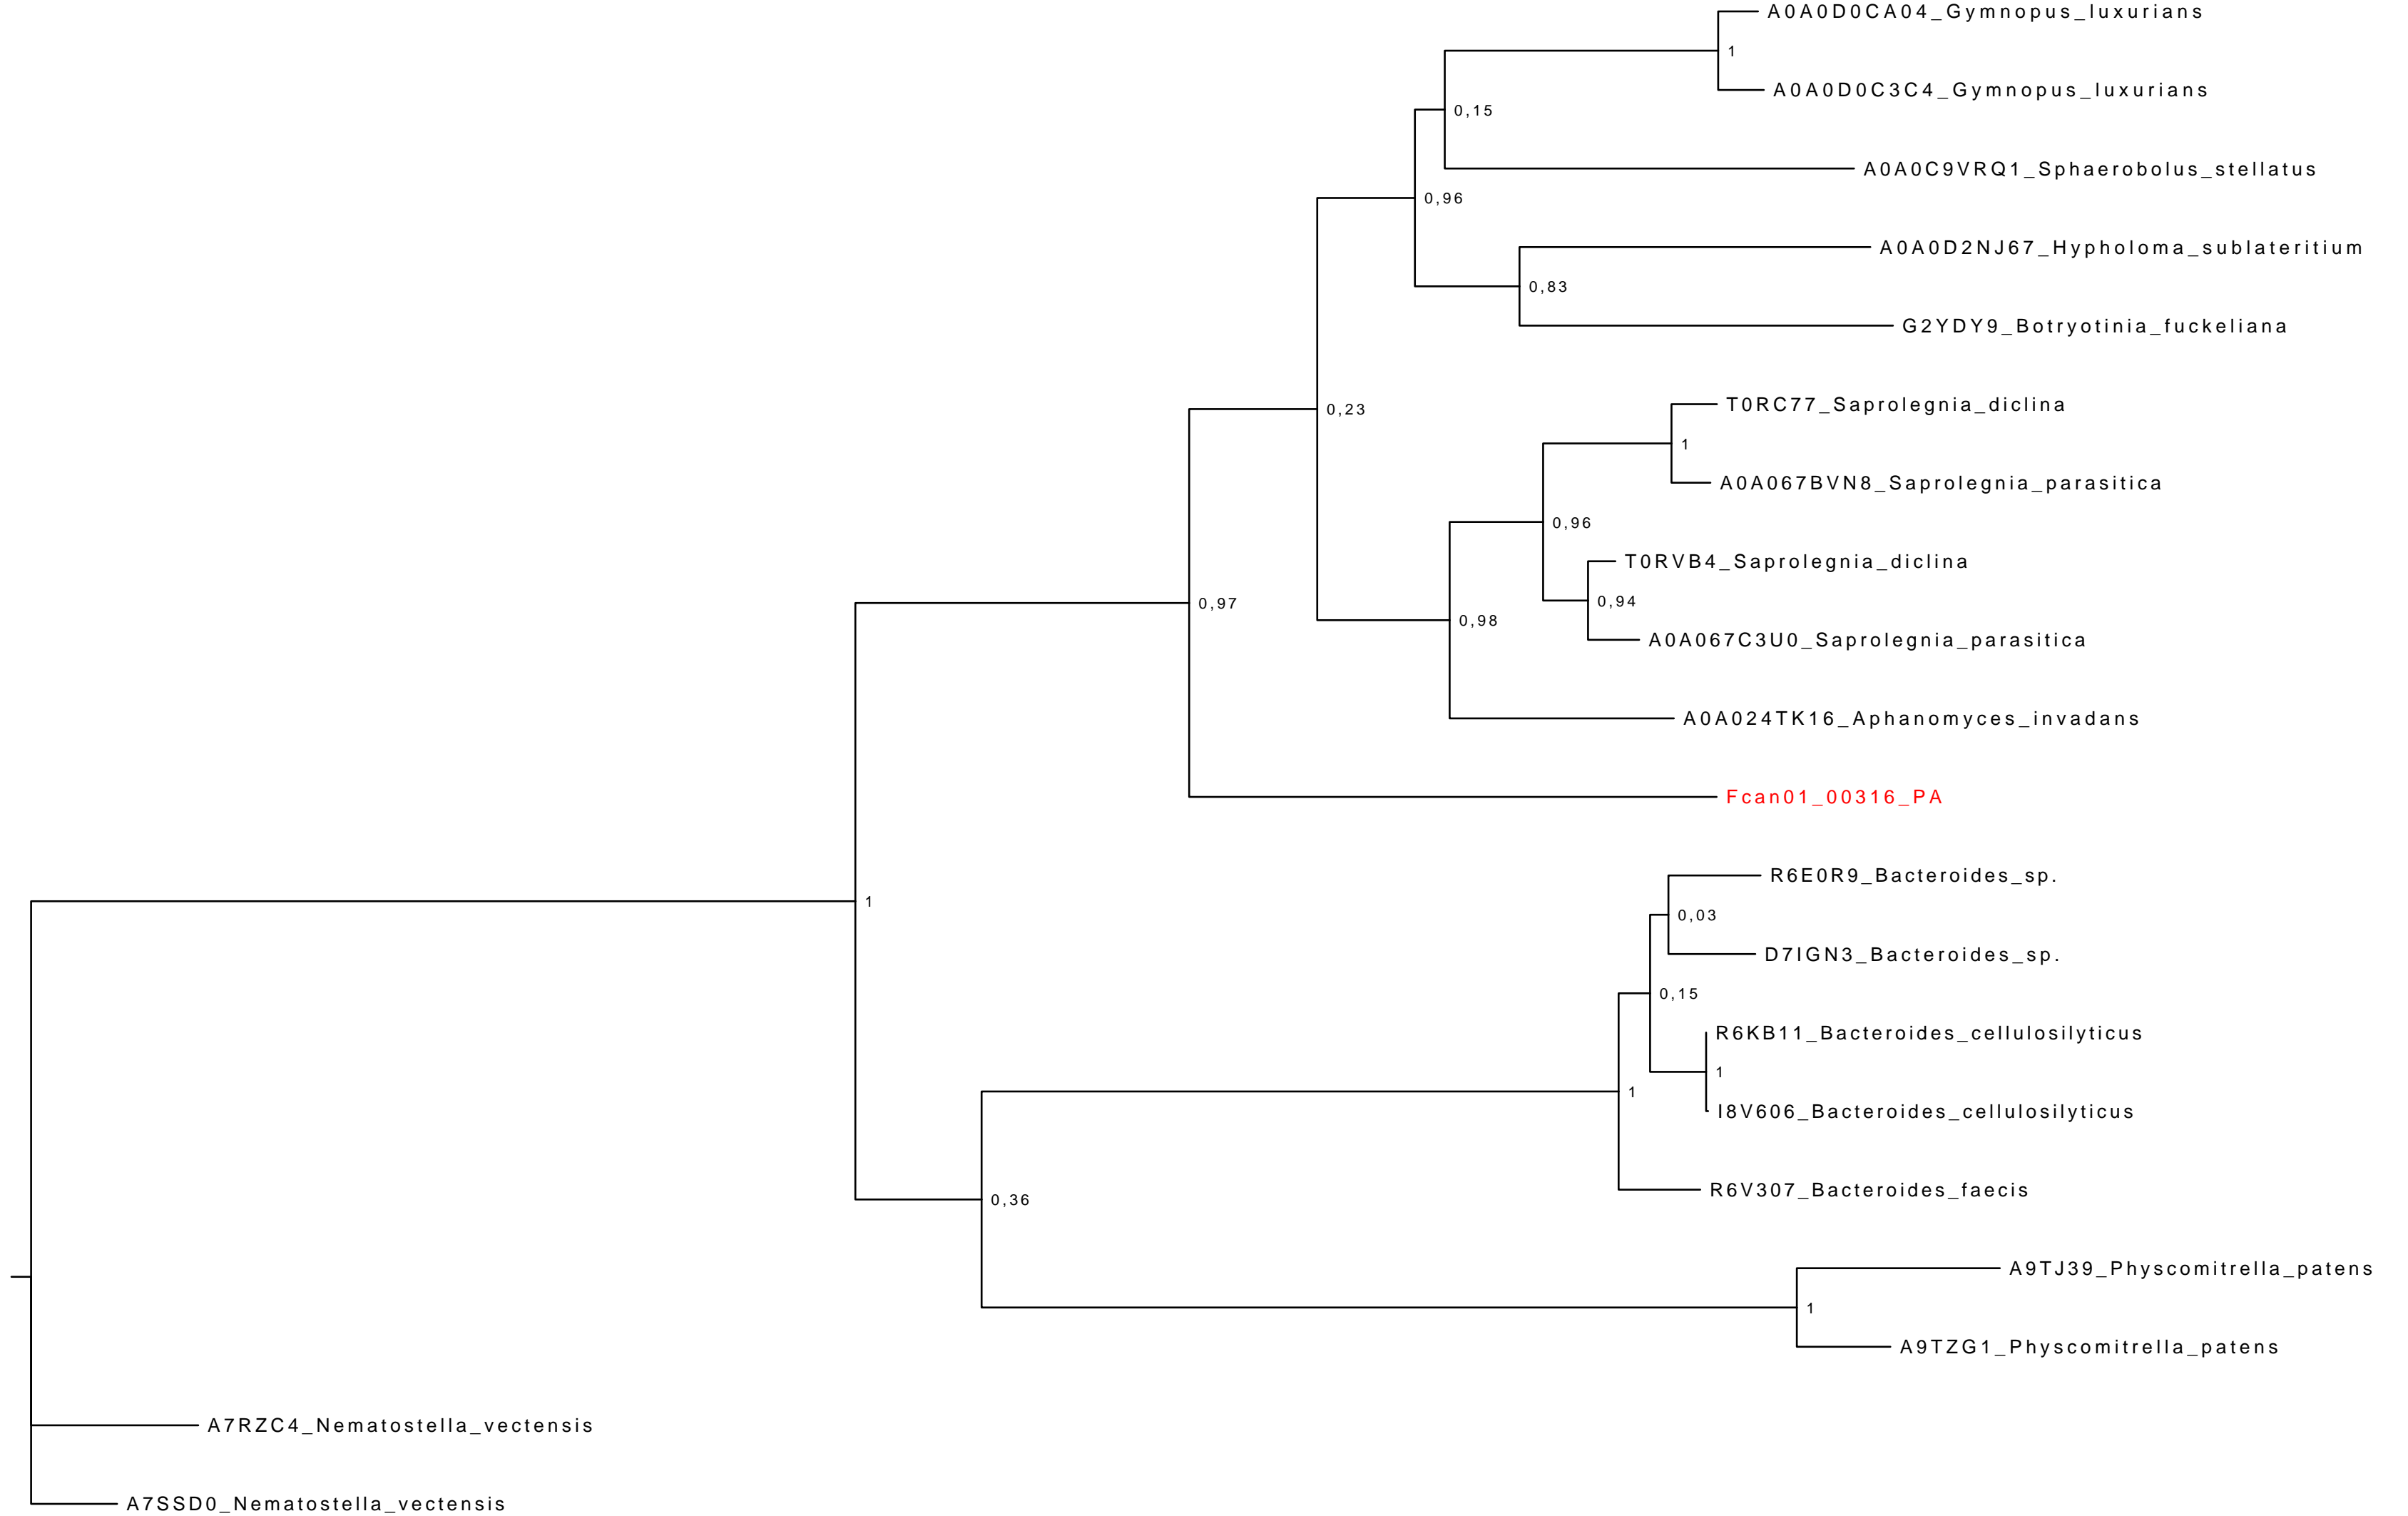

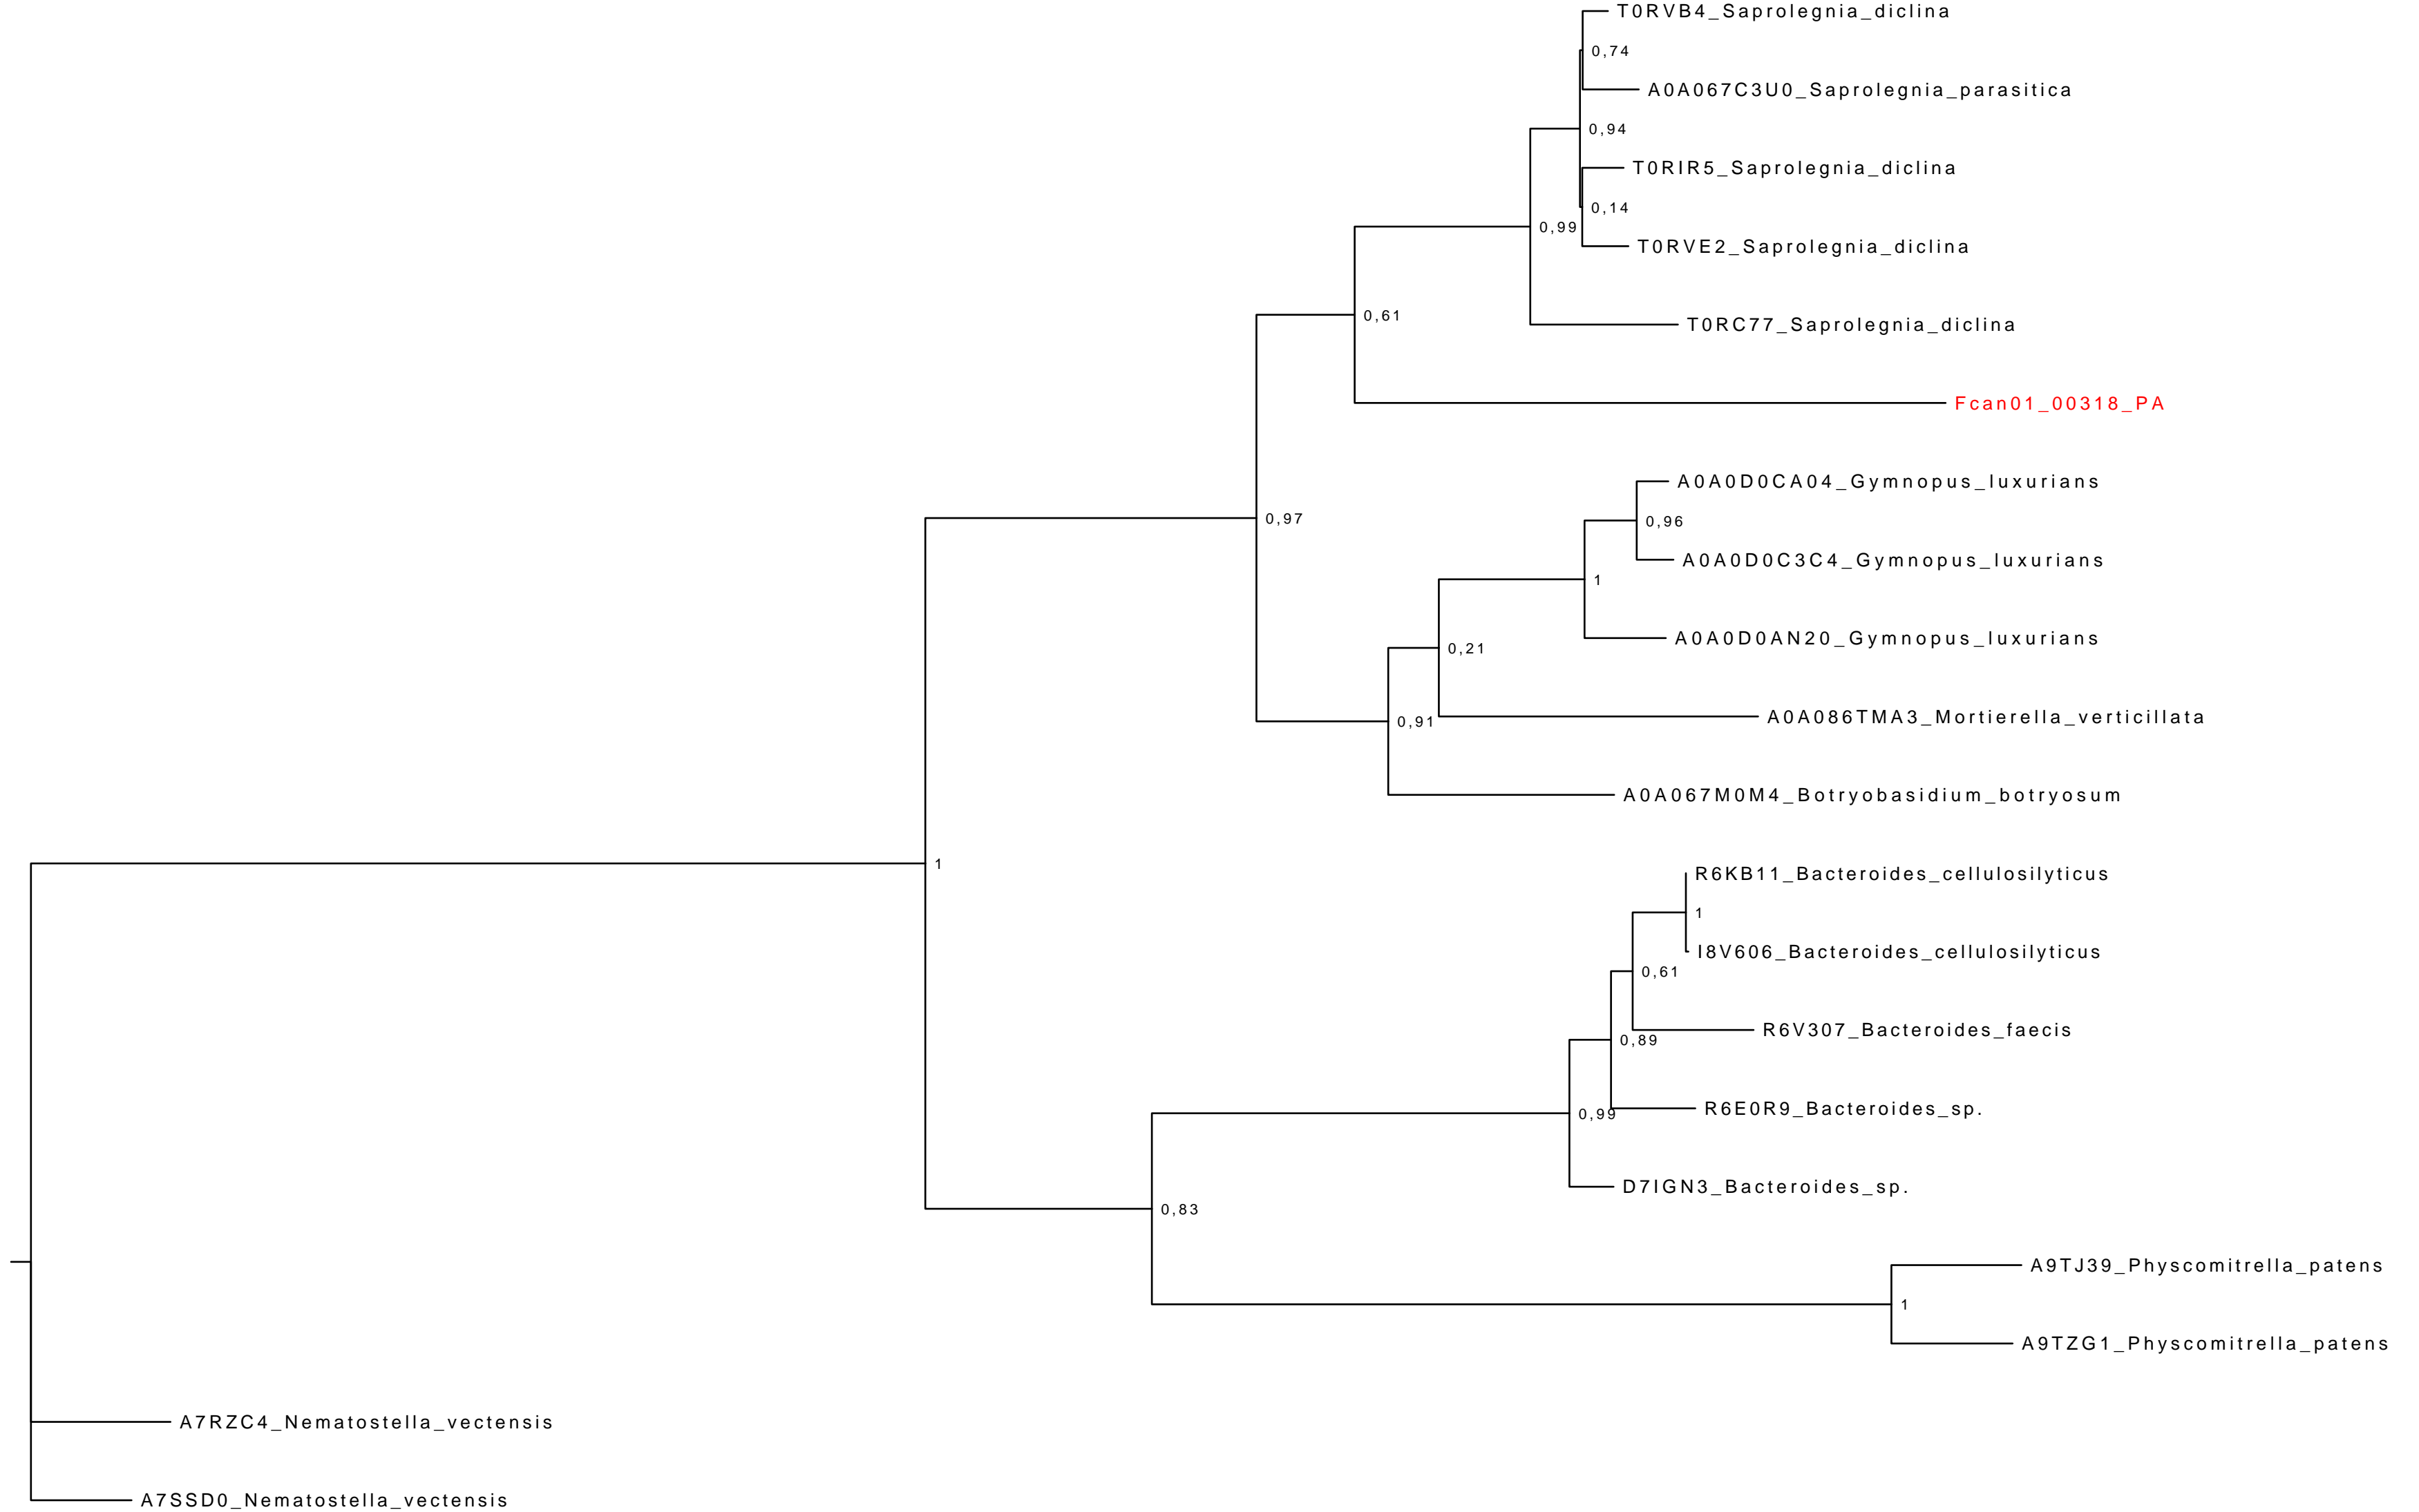

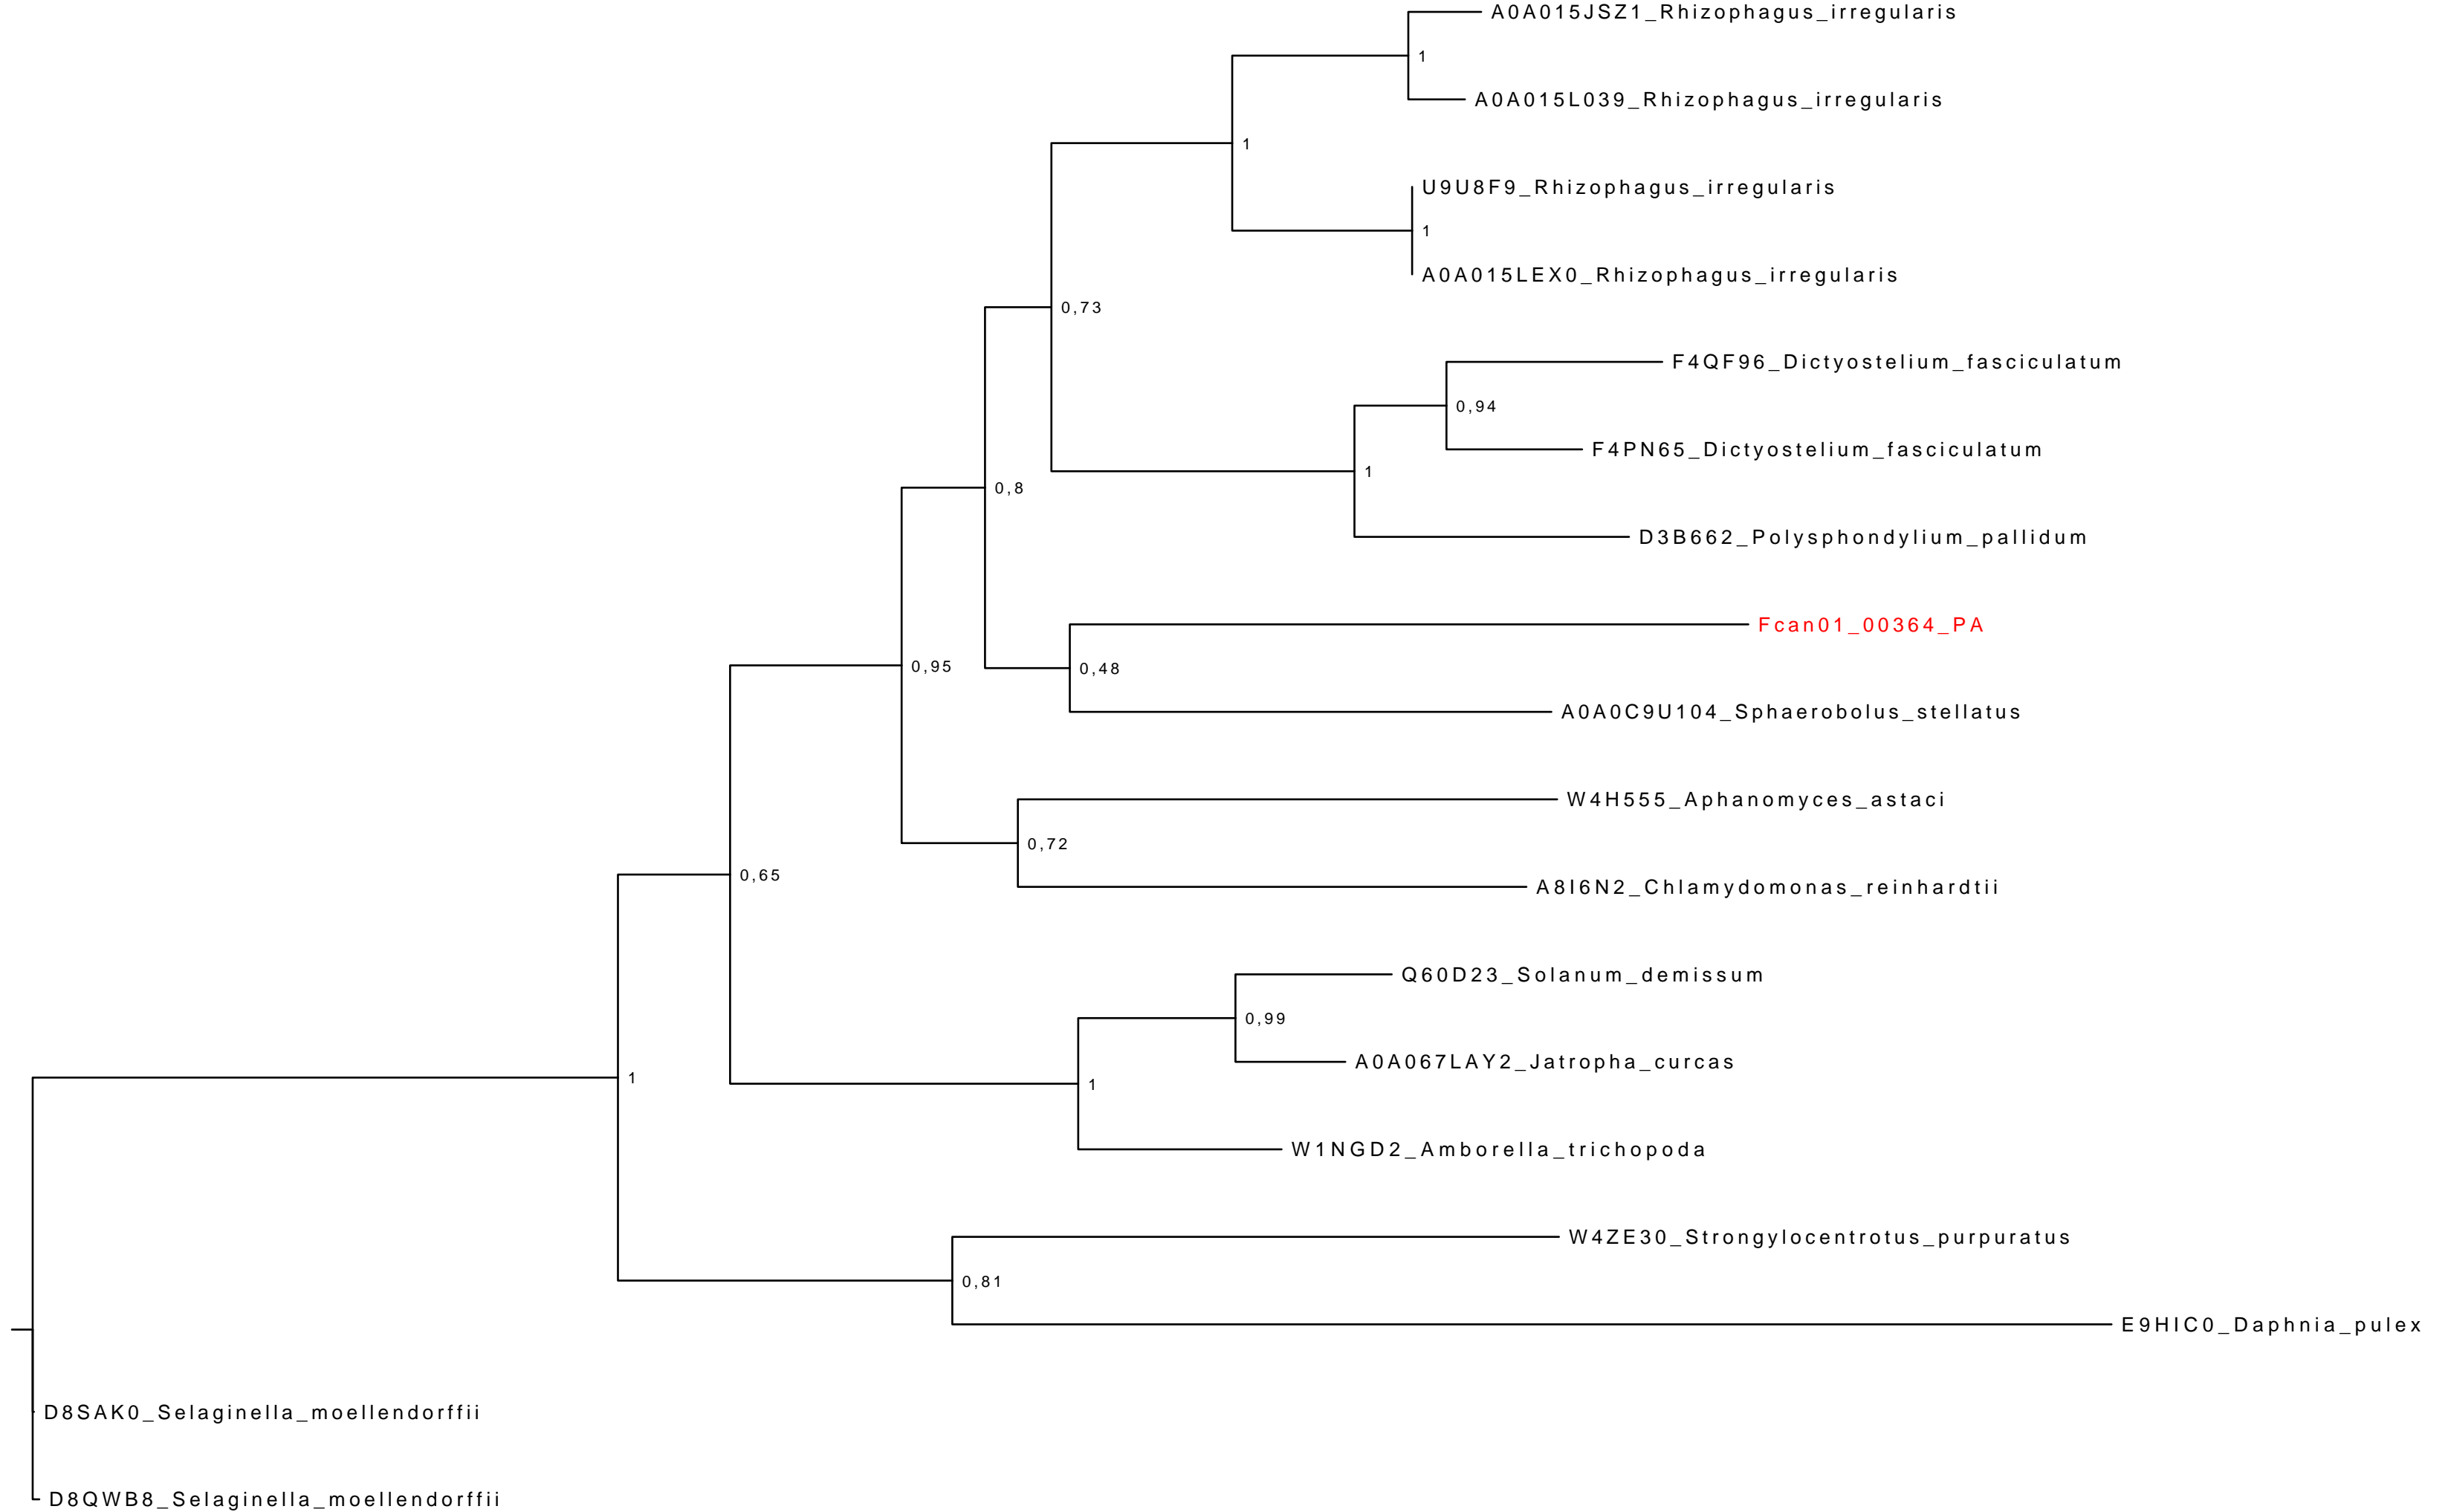

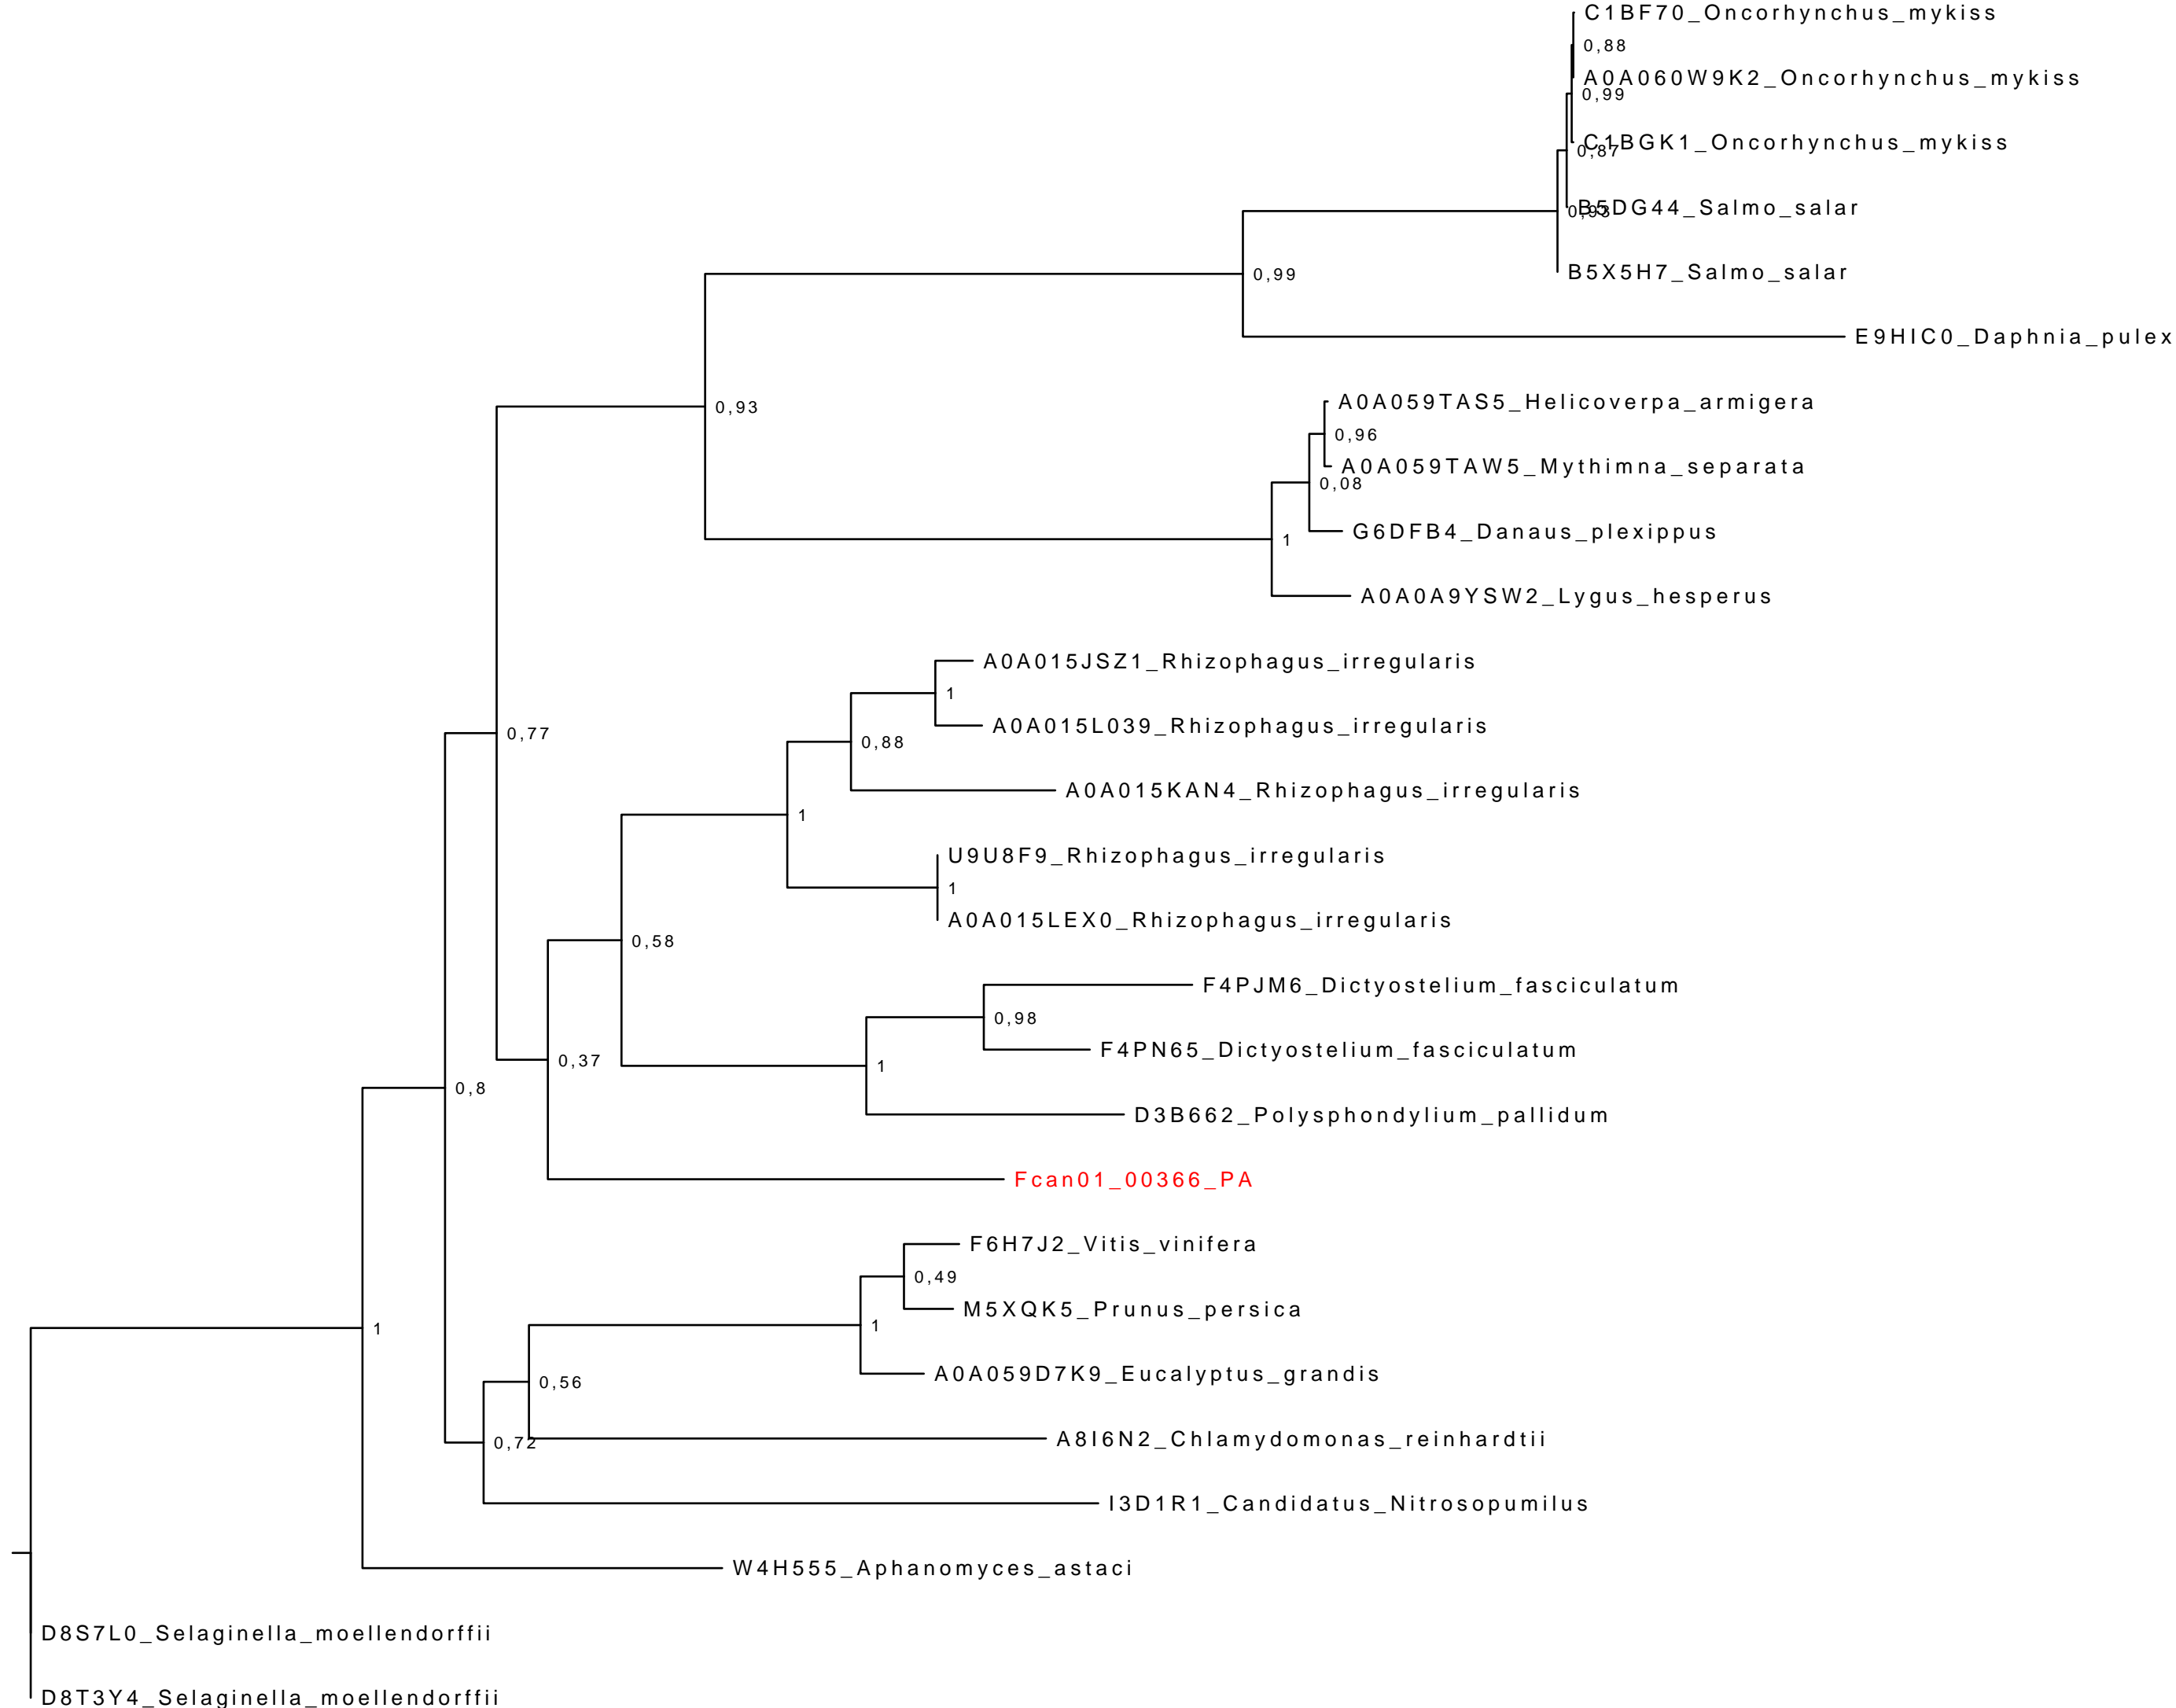

0.7

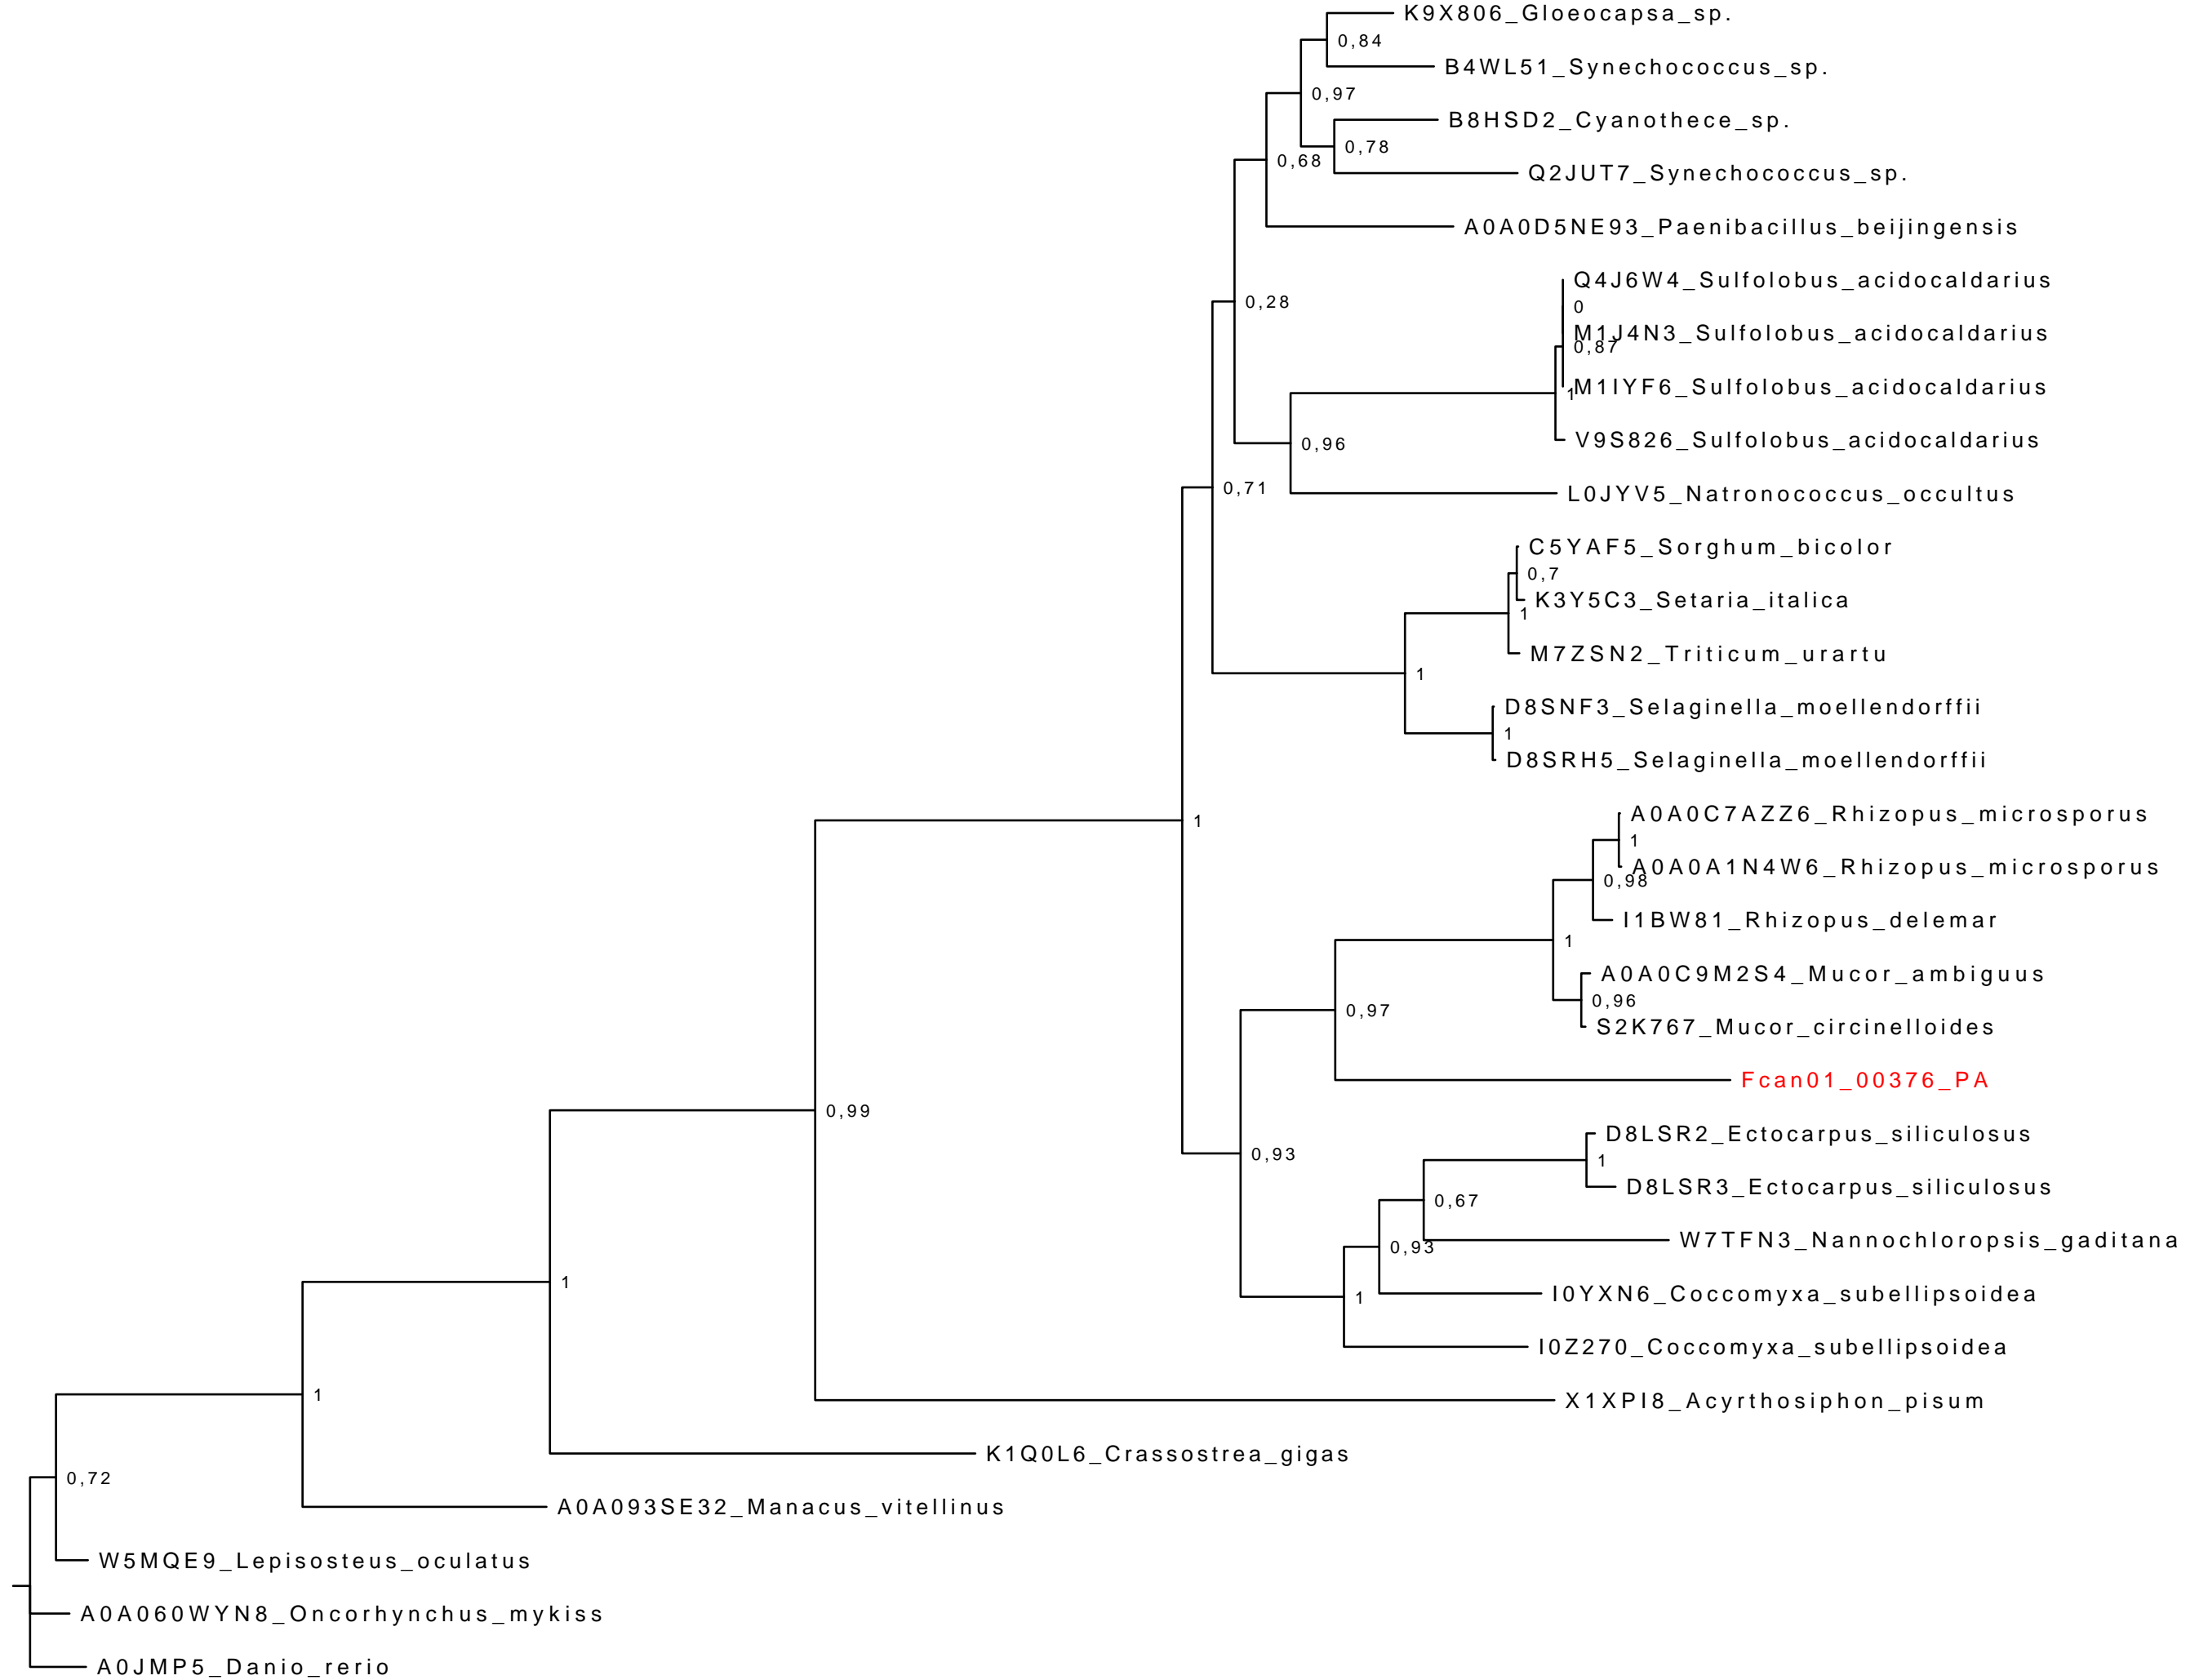

0.5

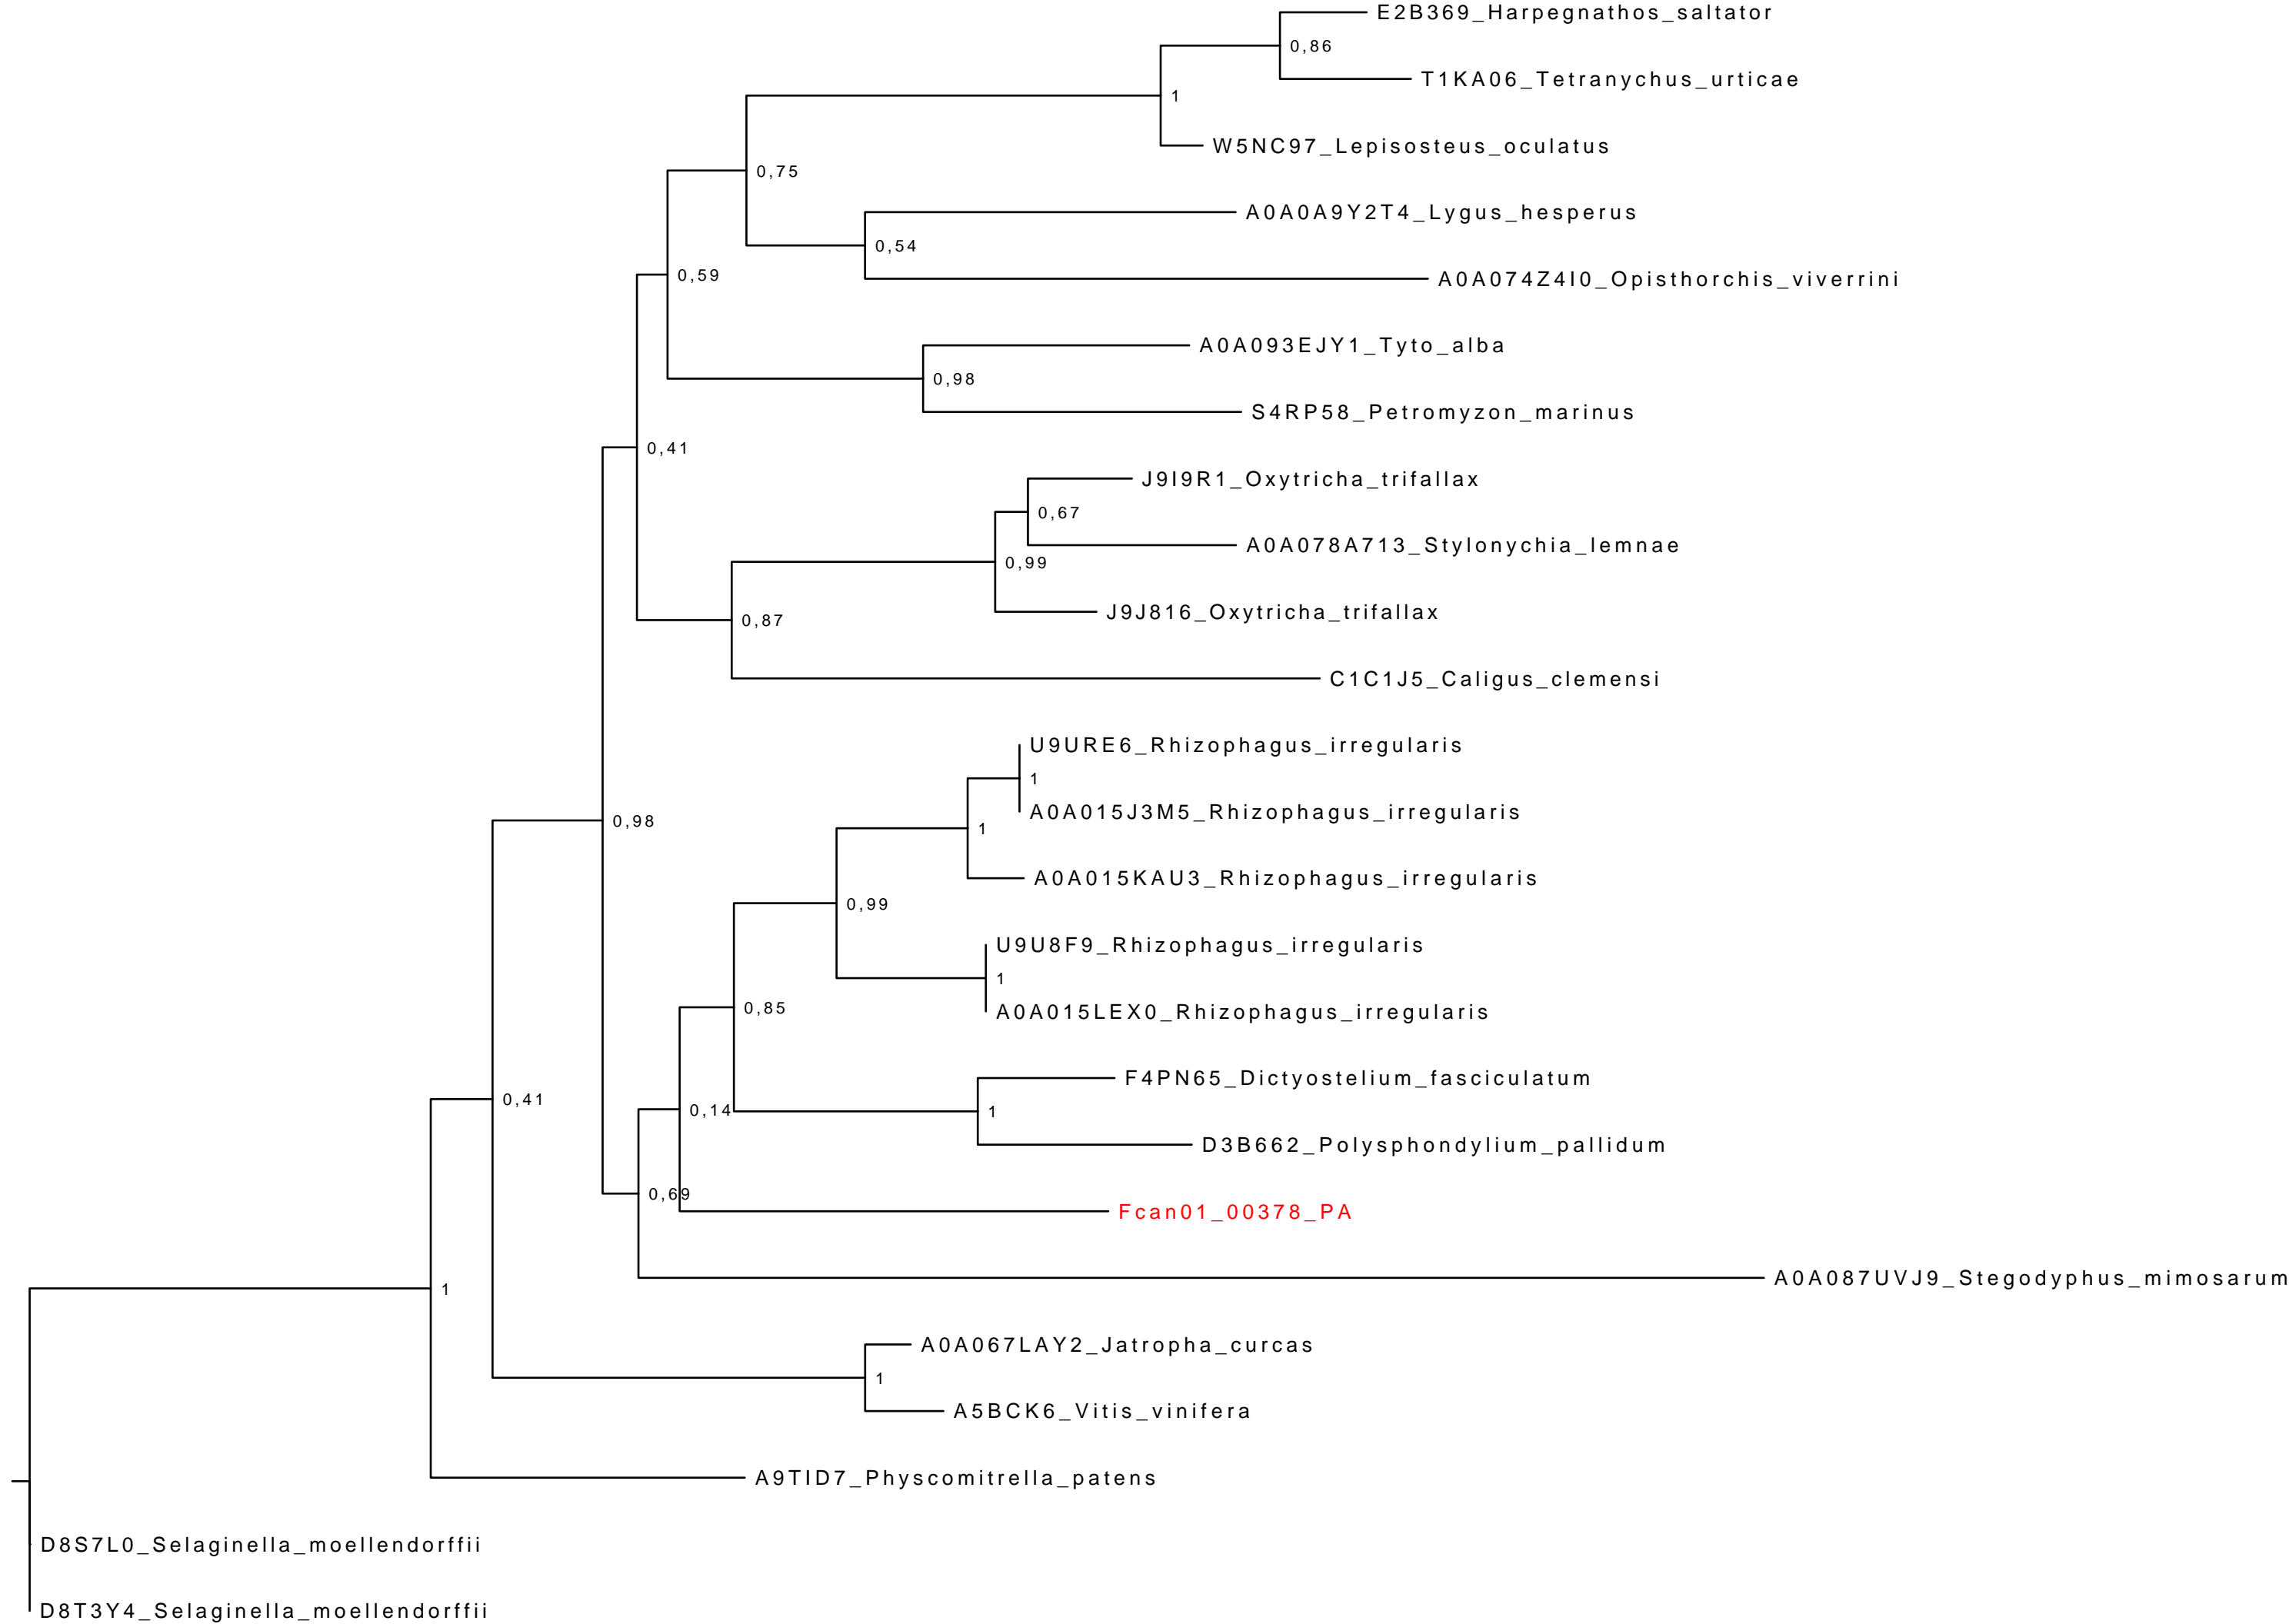

0.7



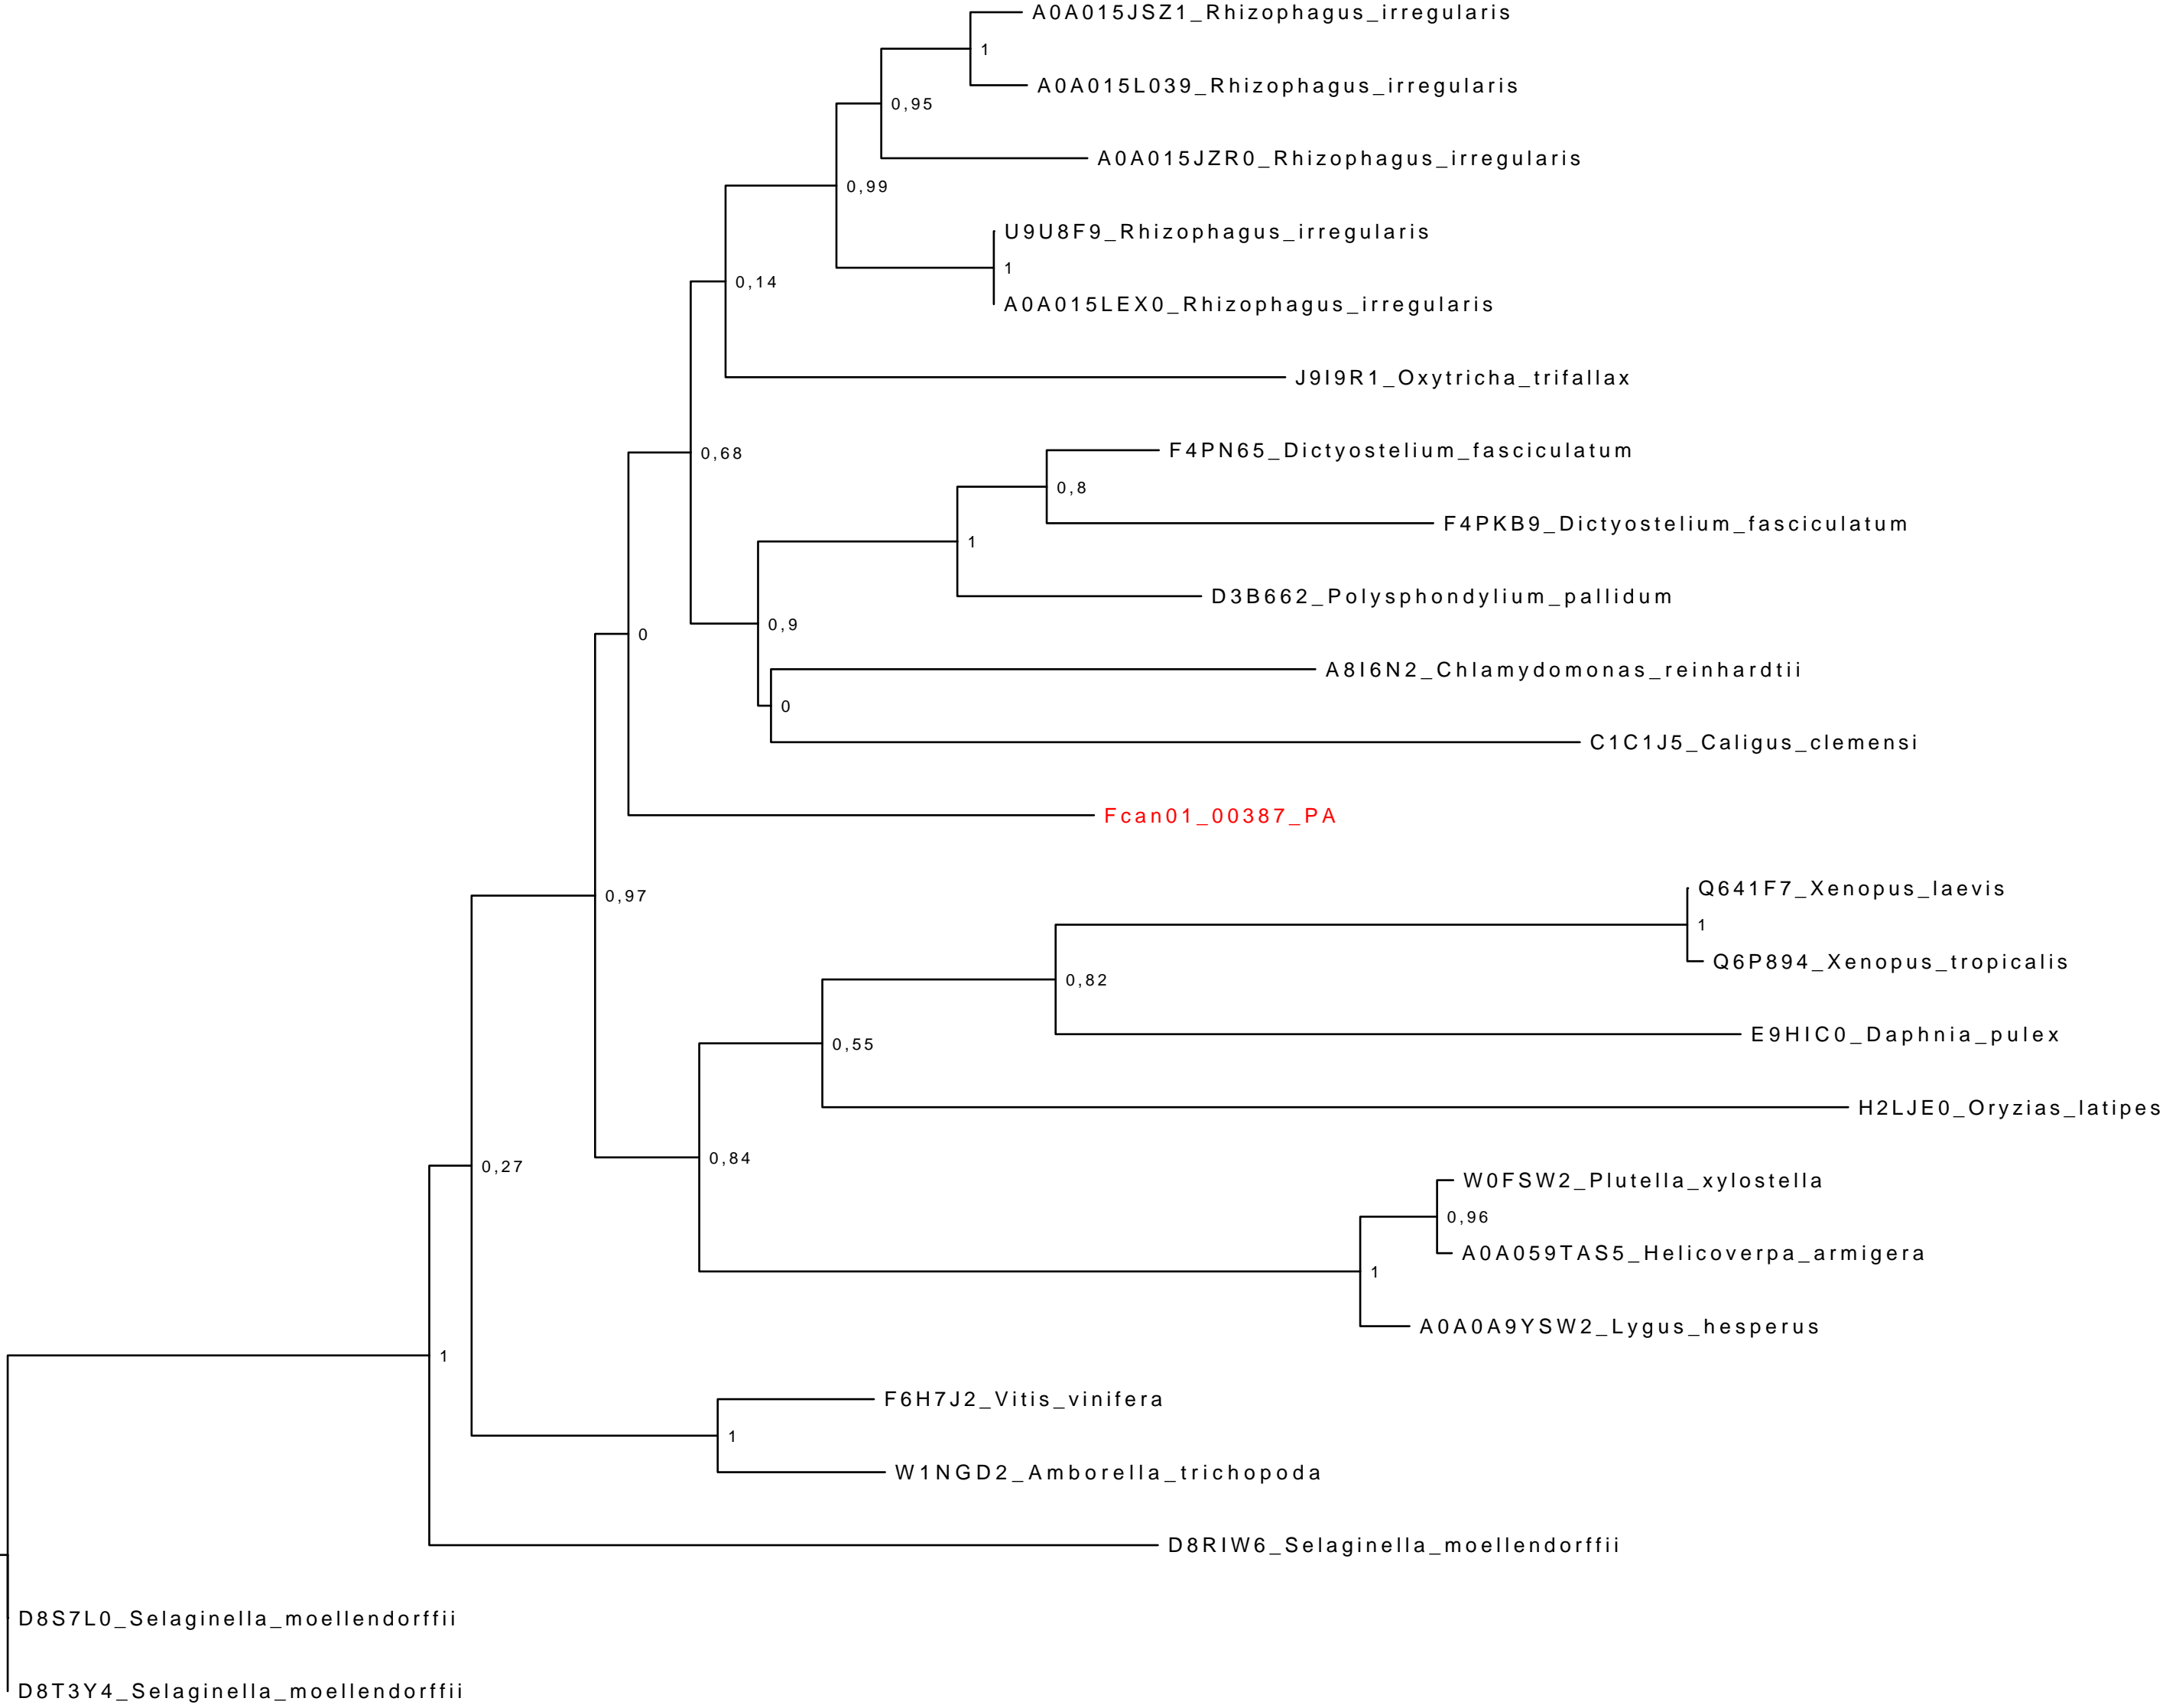

0.6

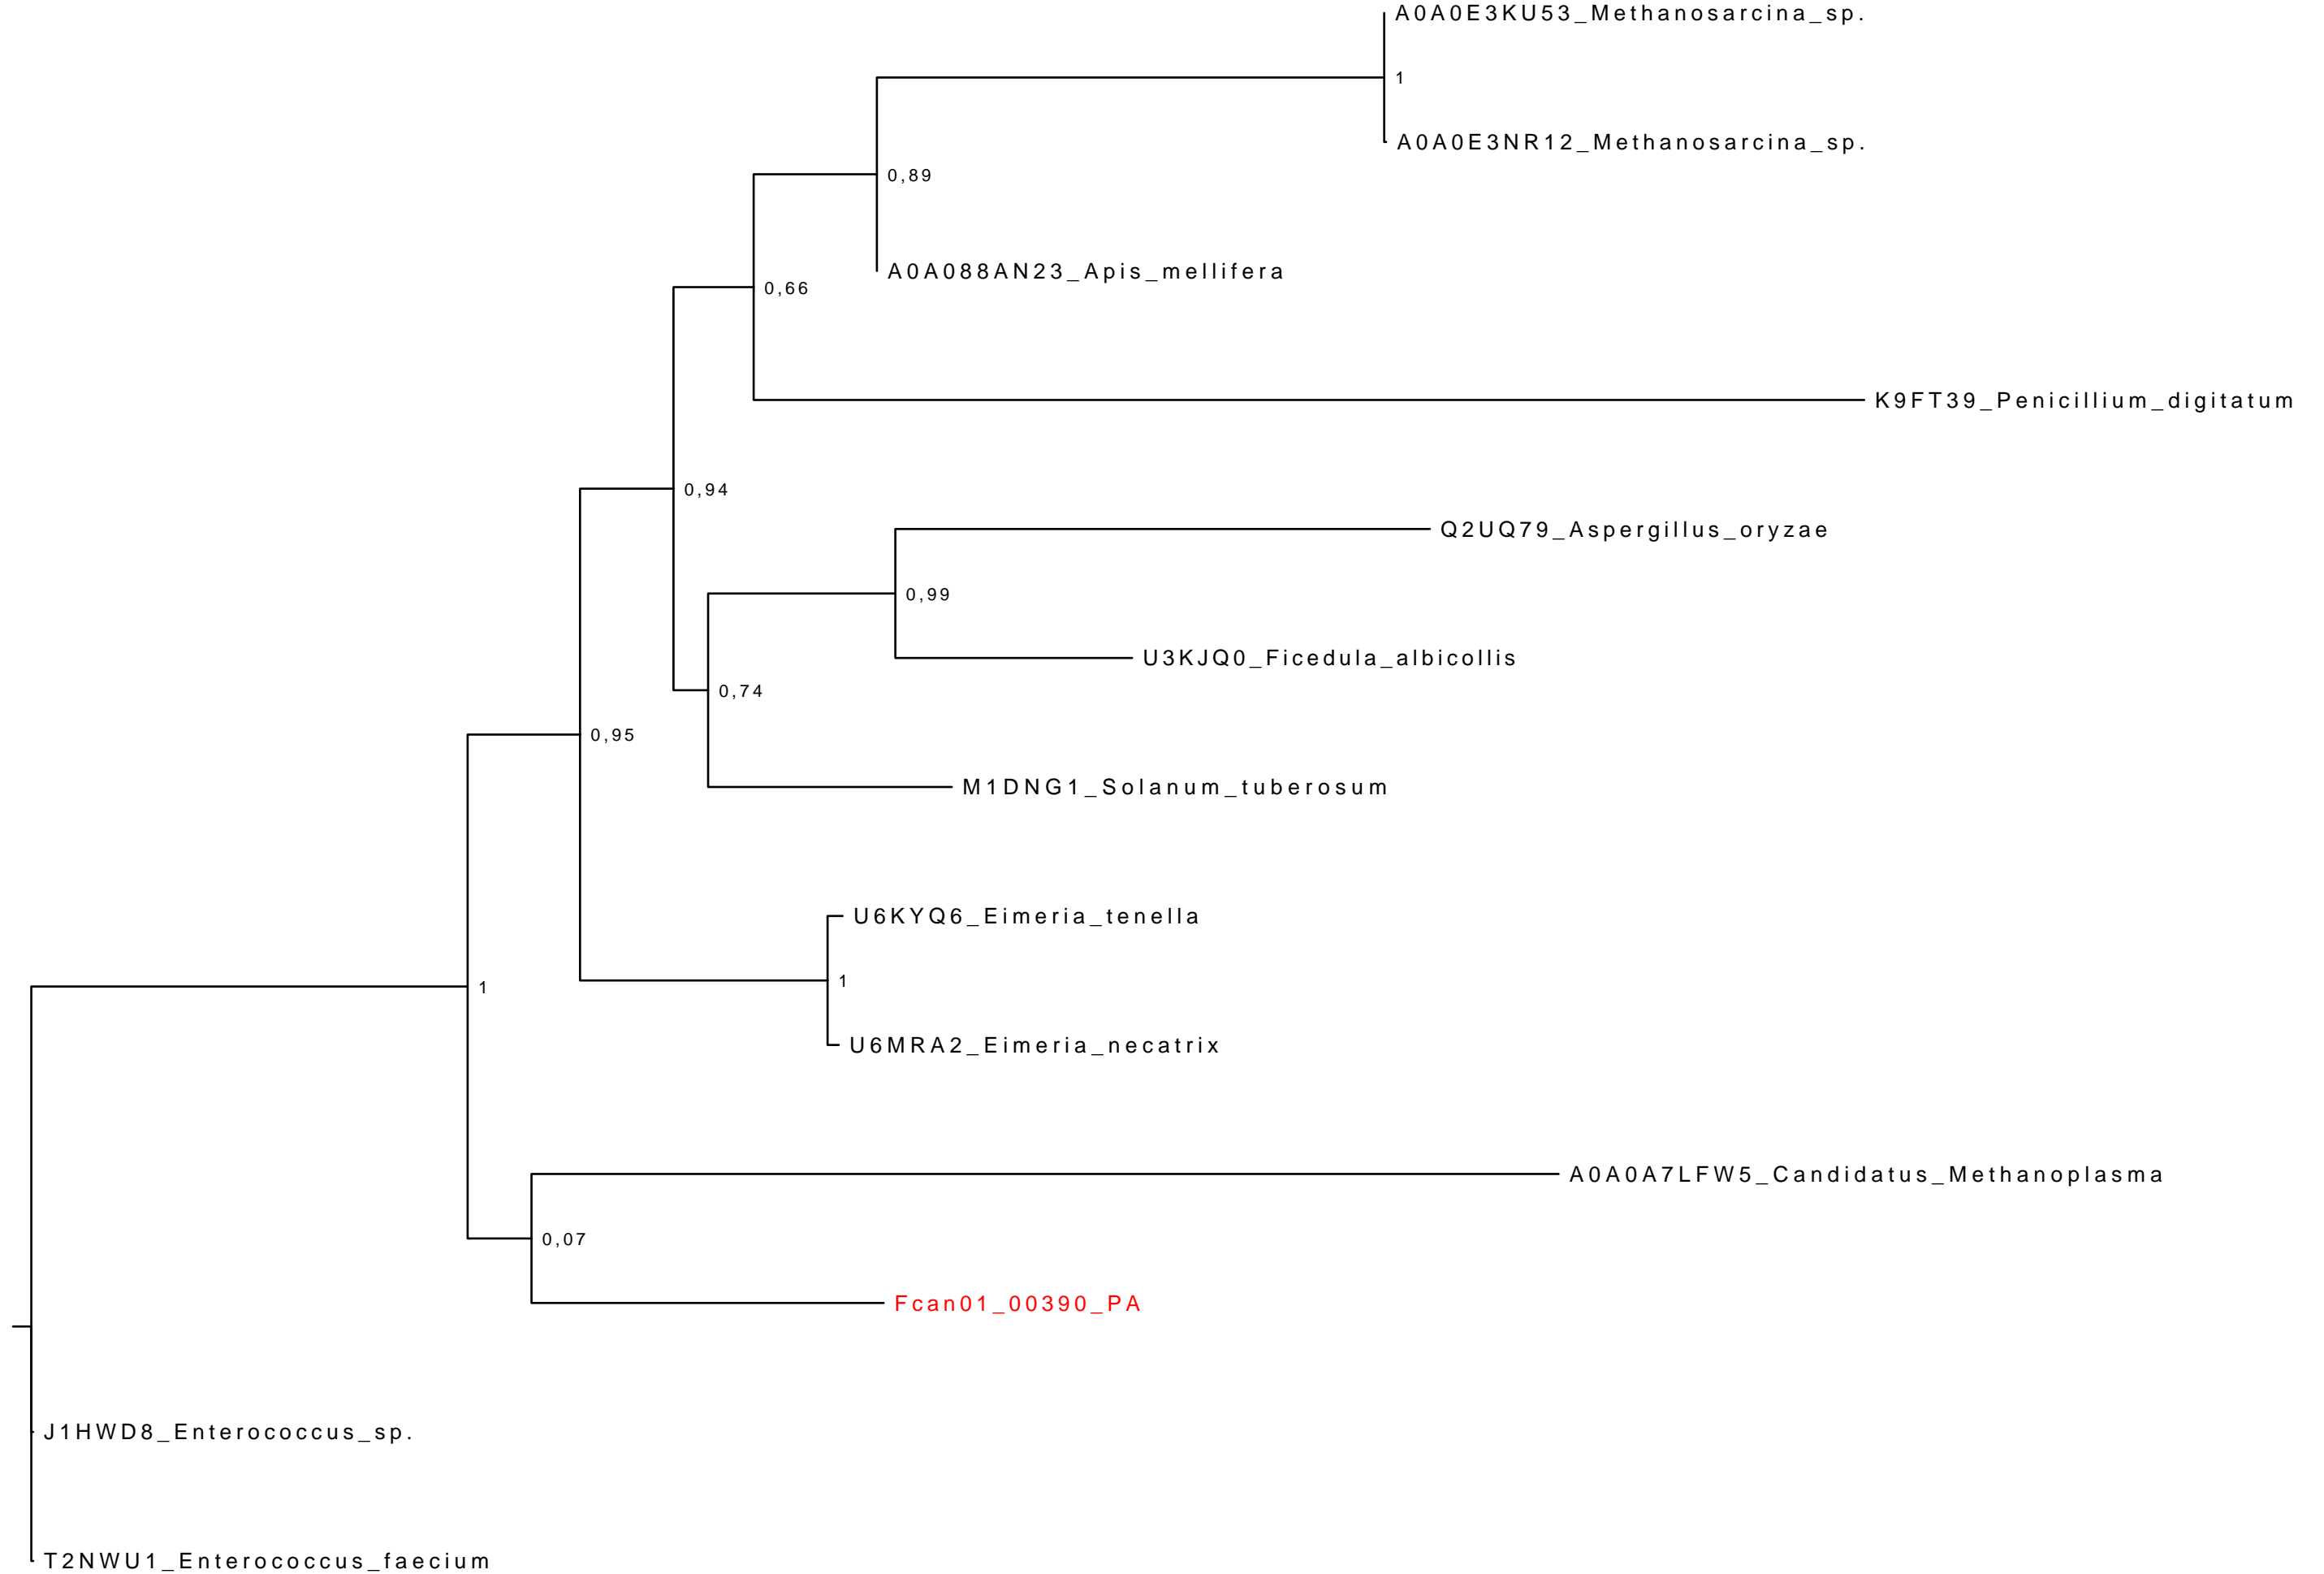

0.5

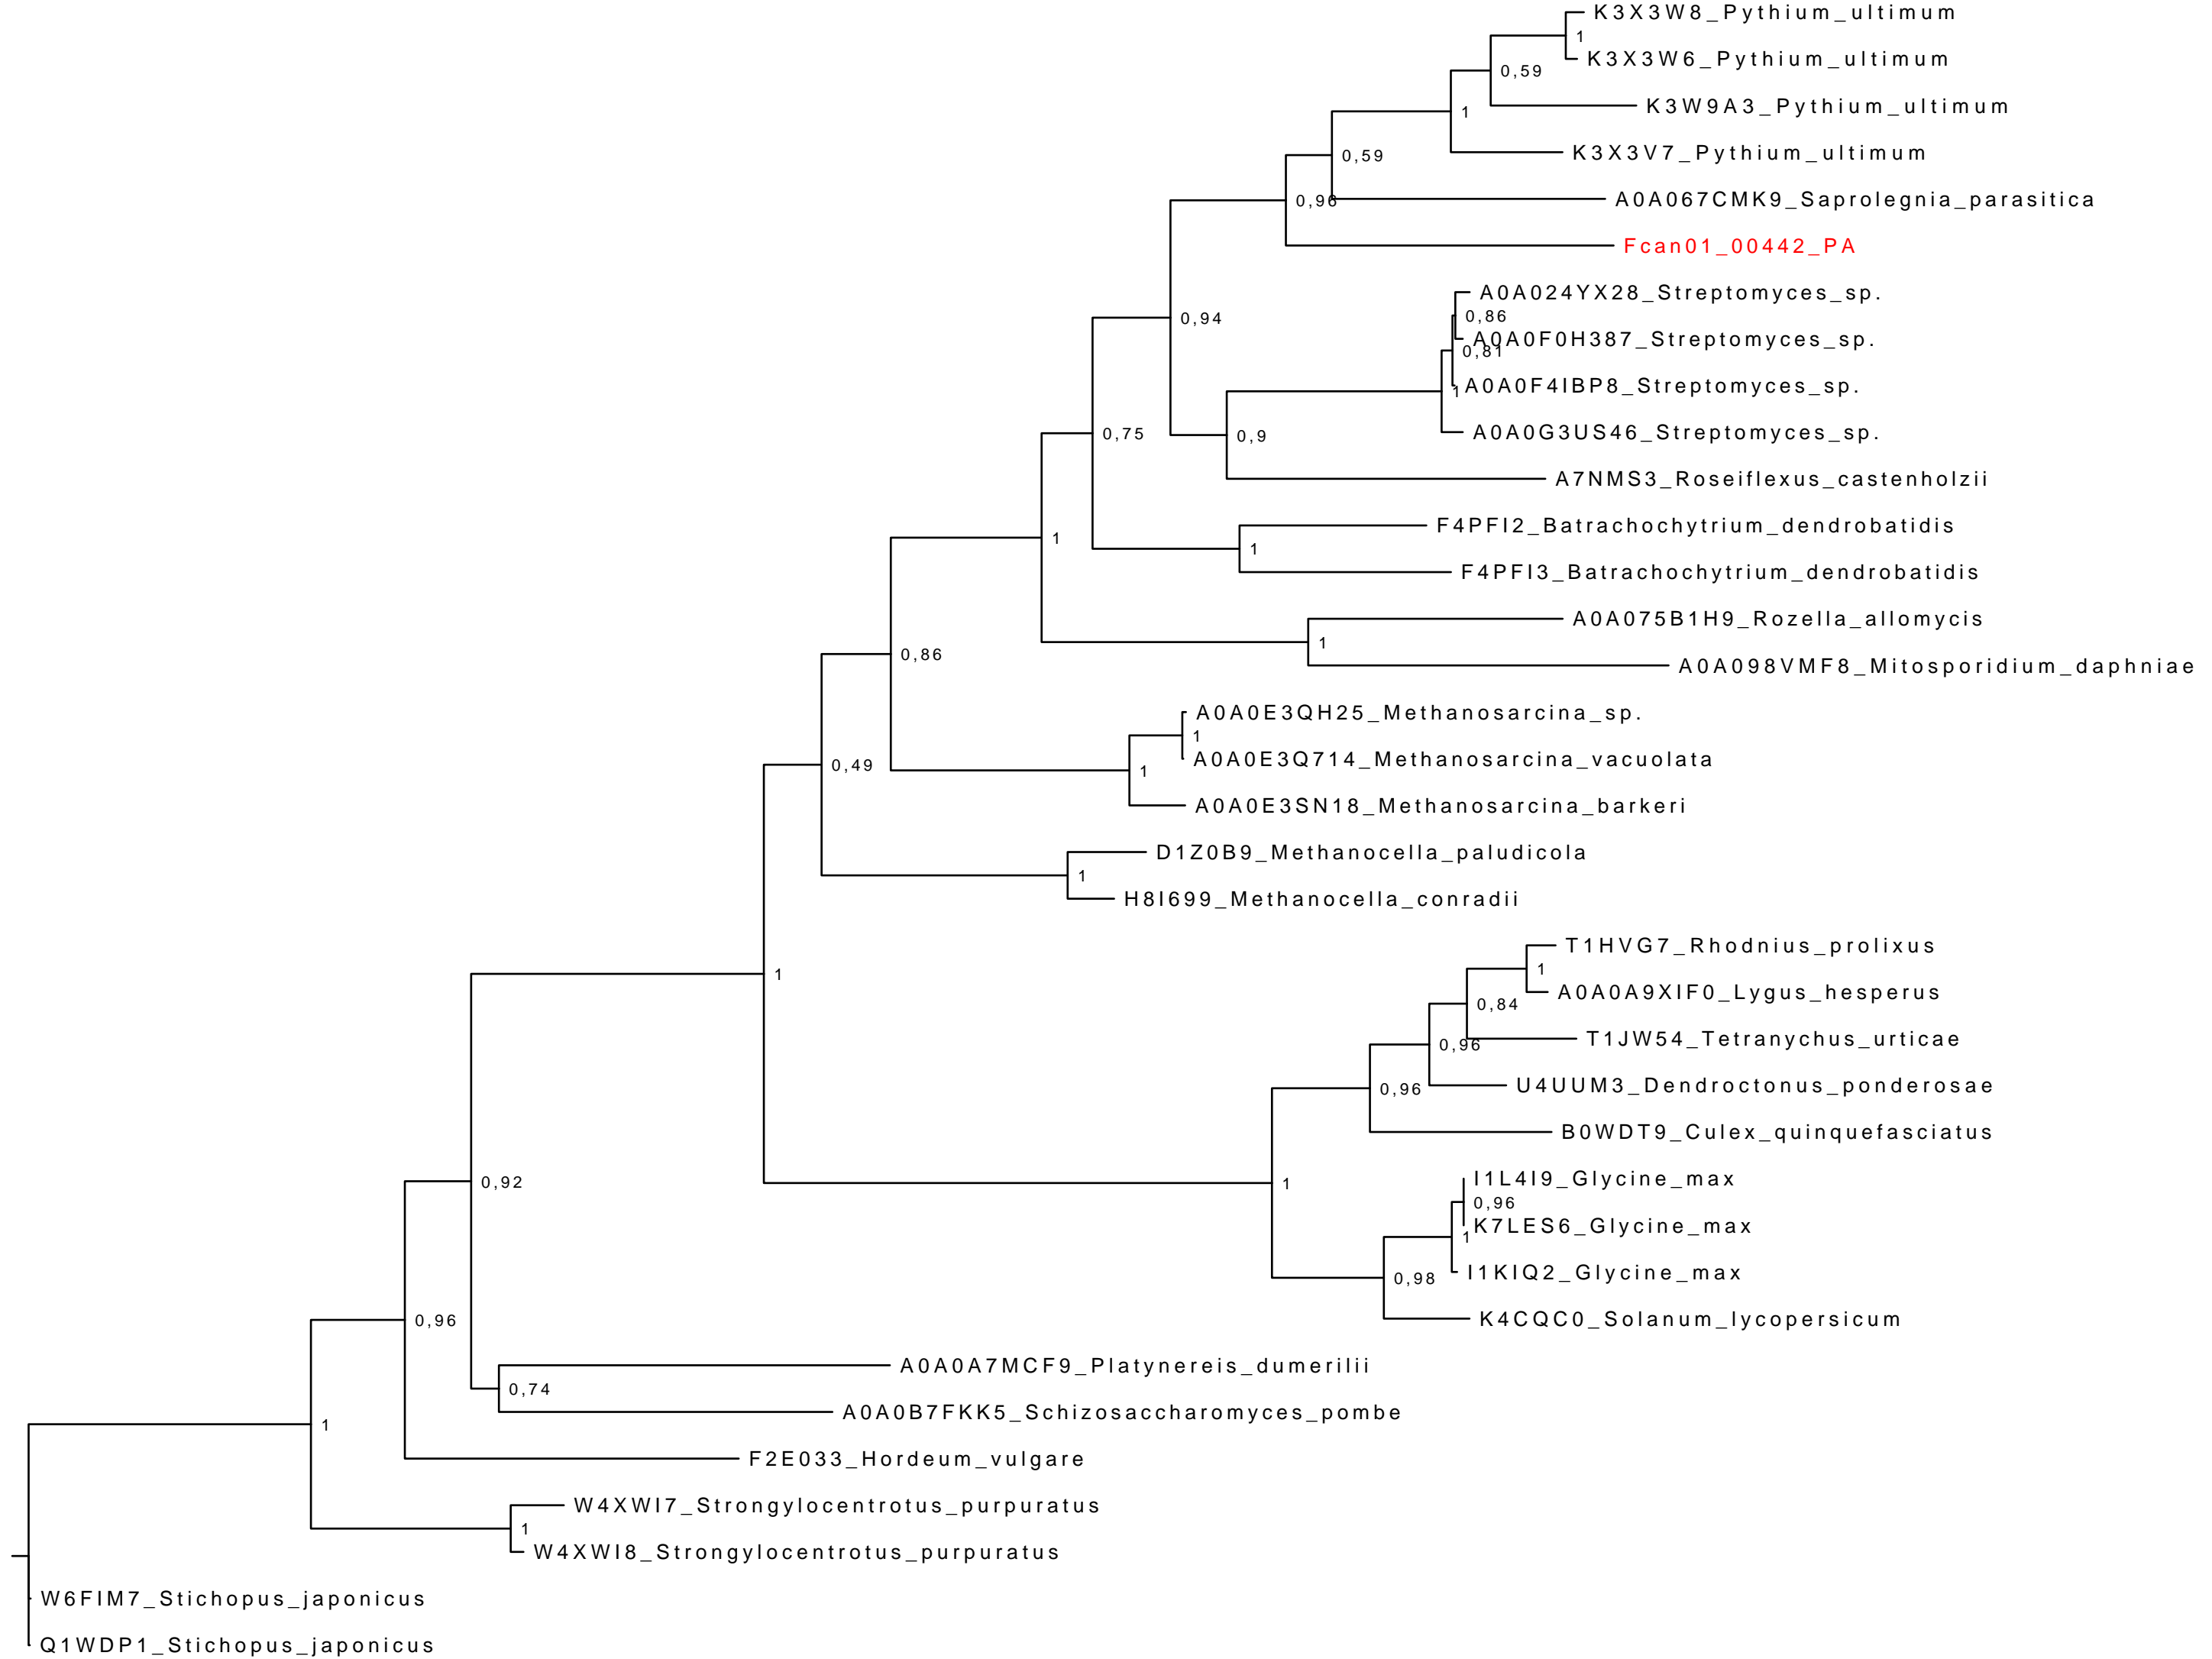

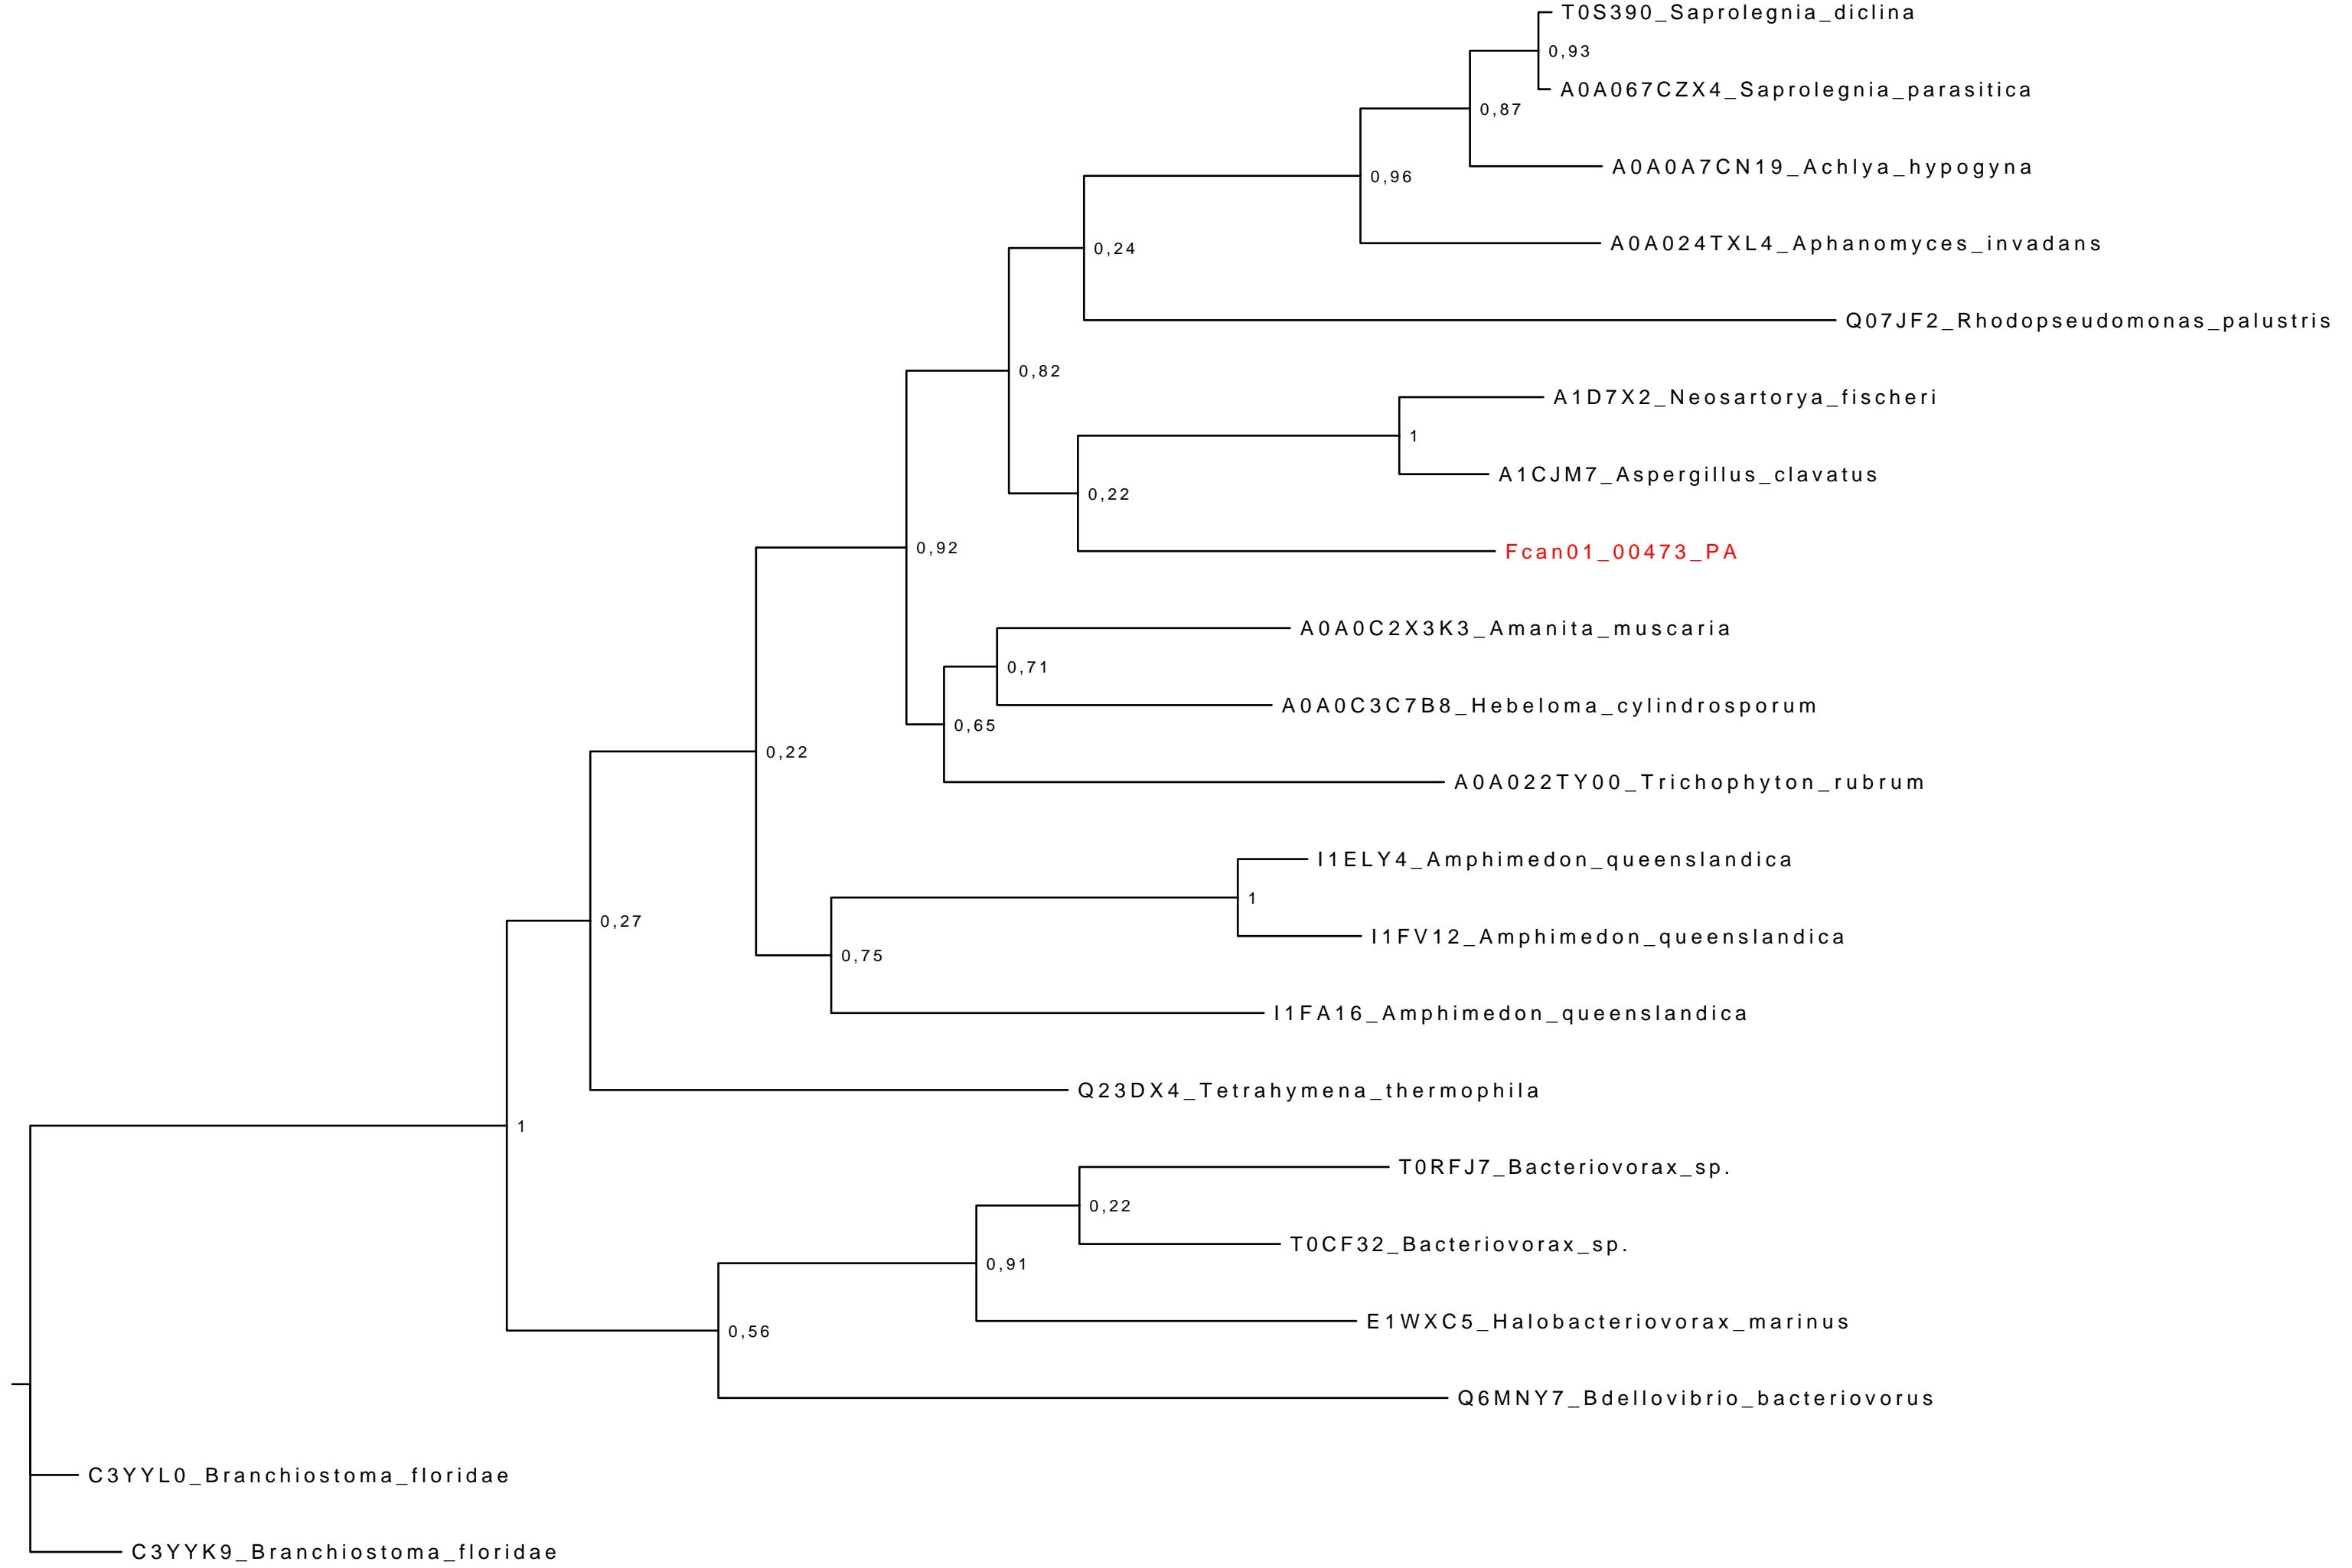

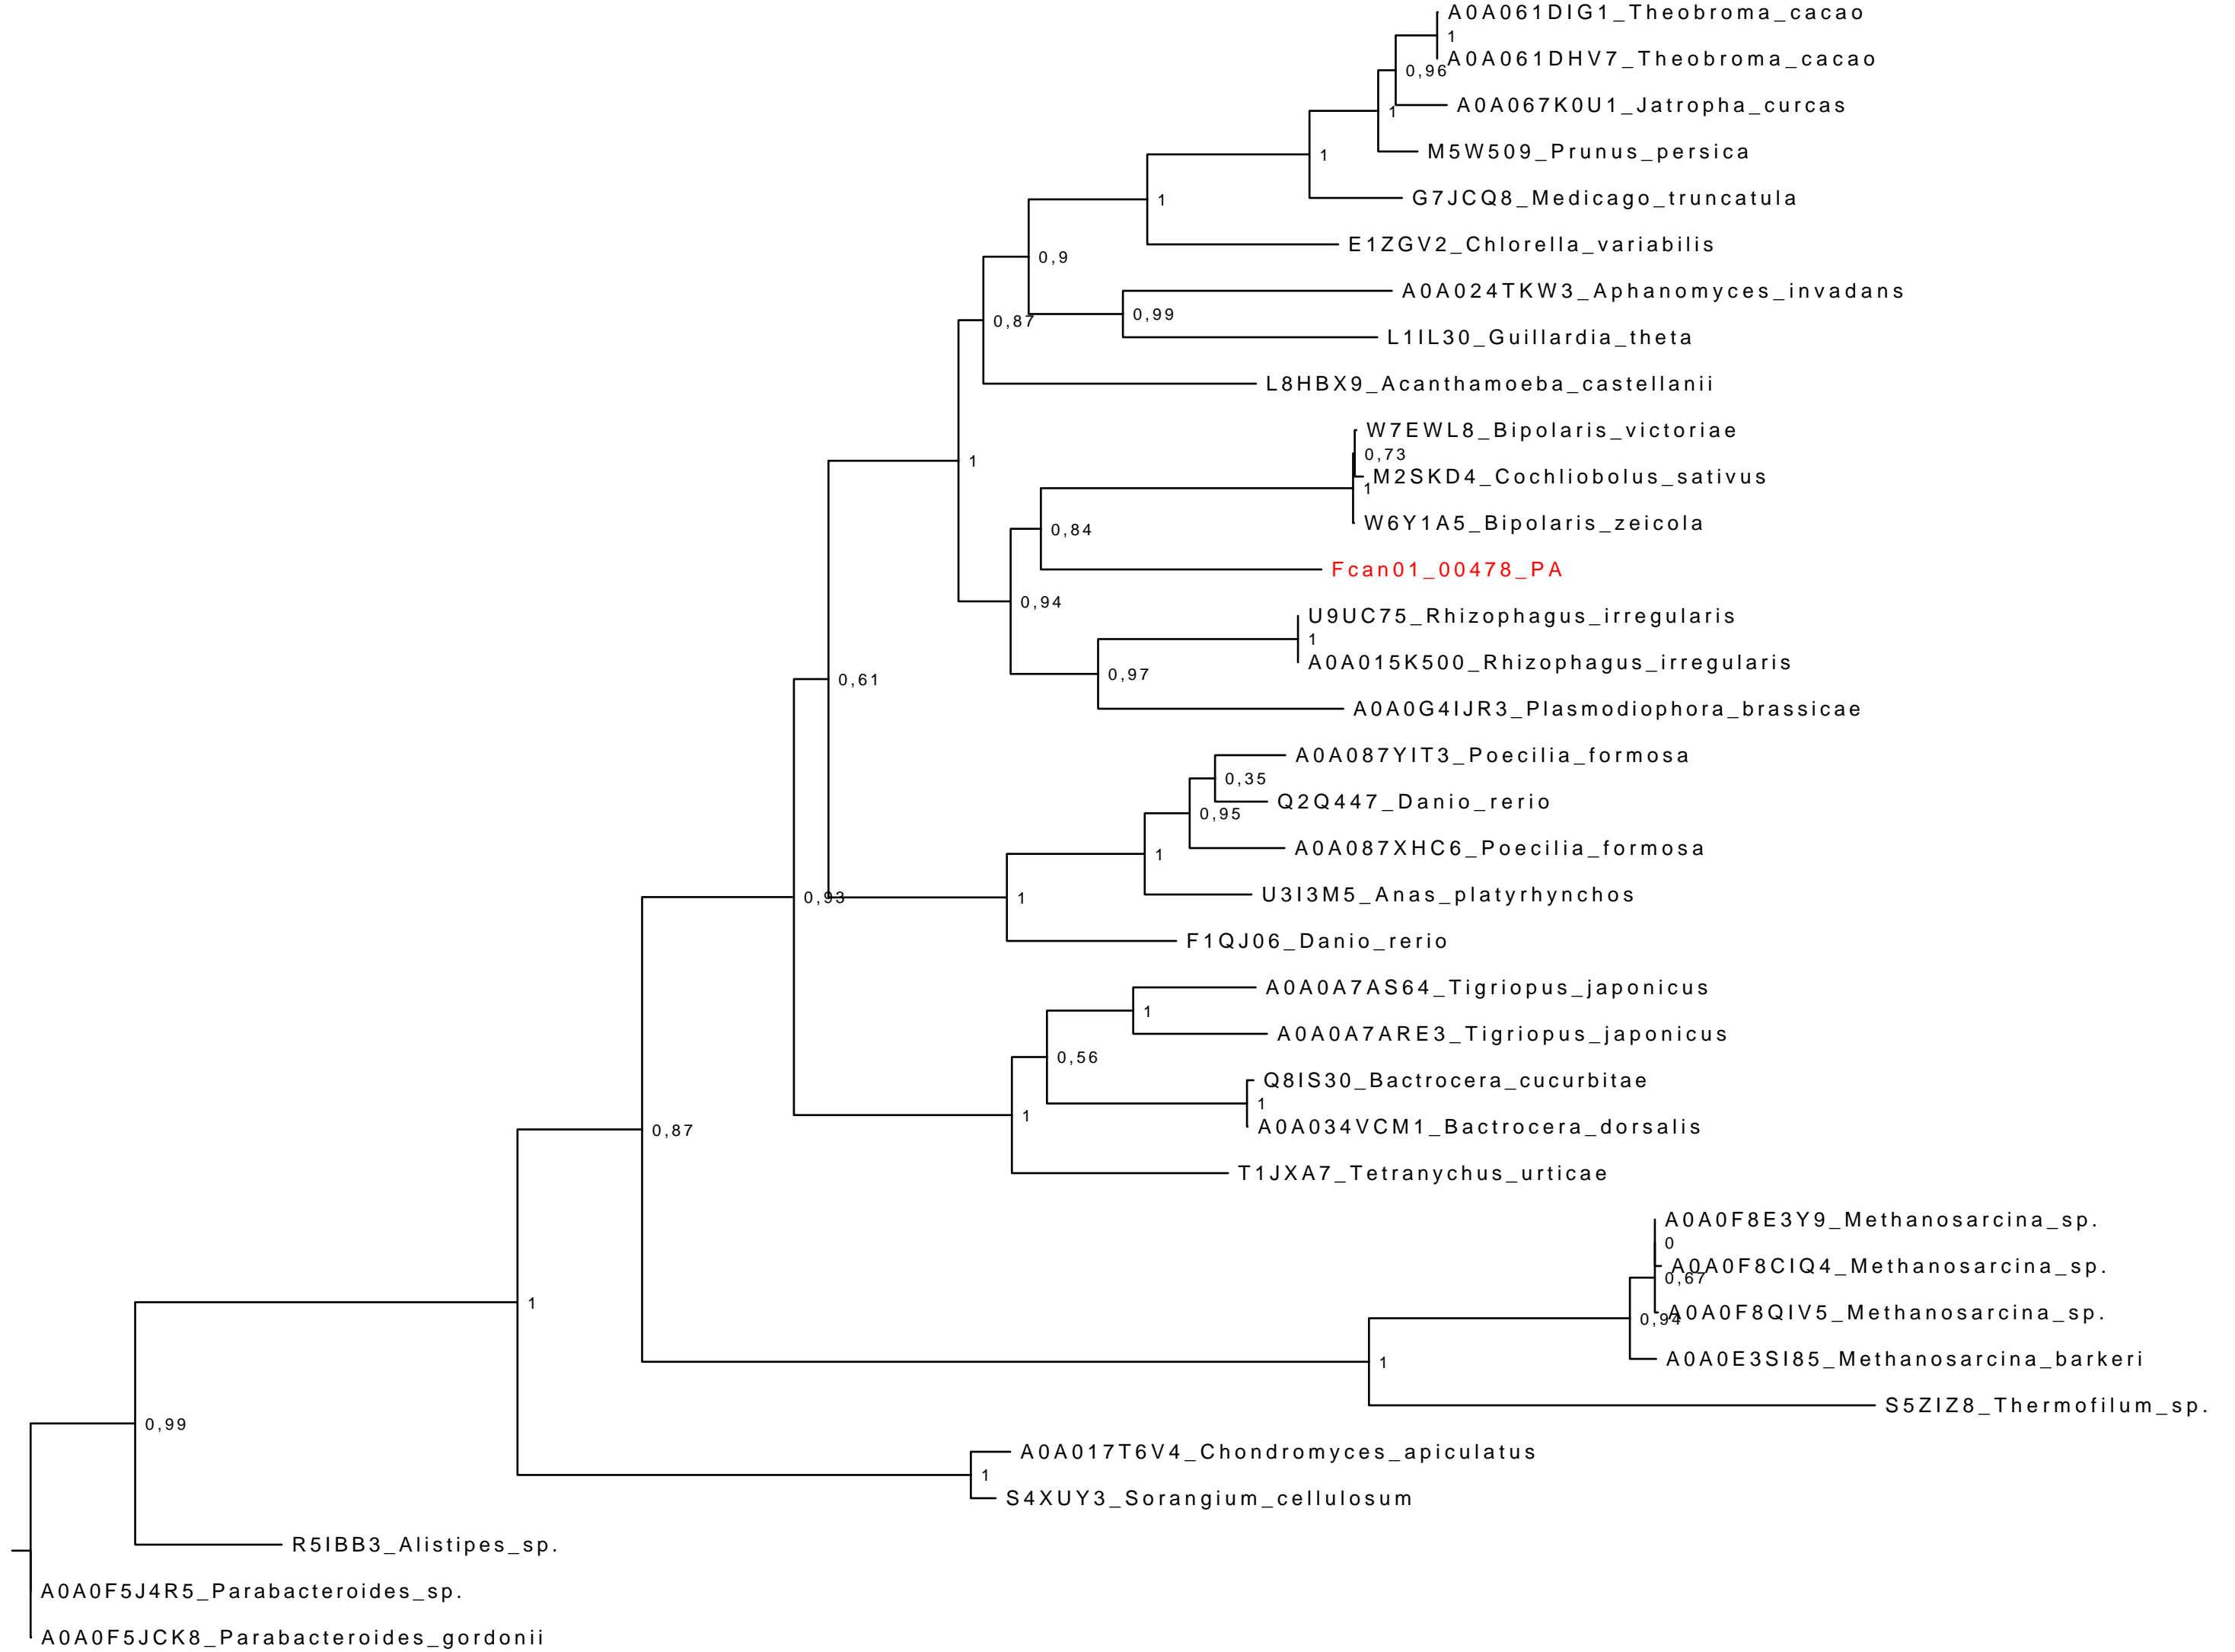

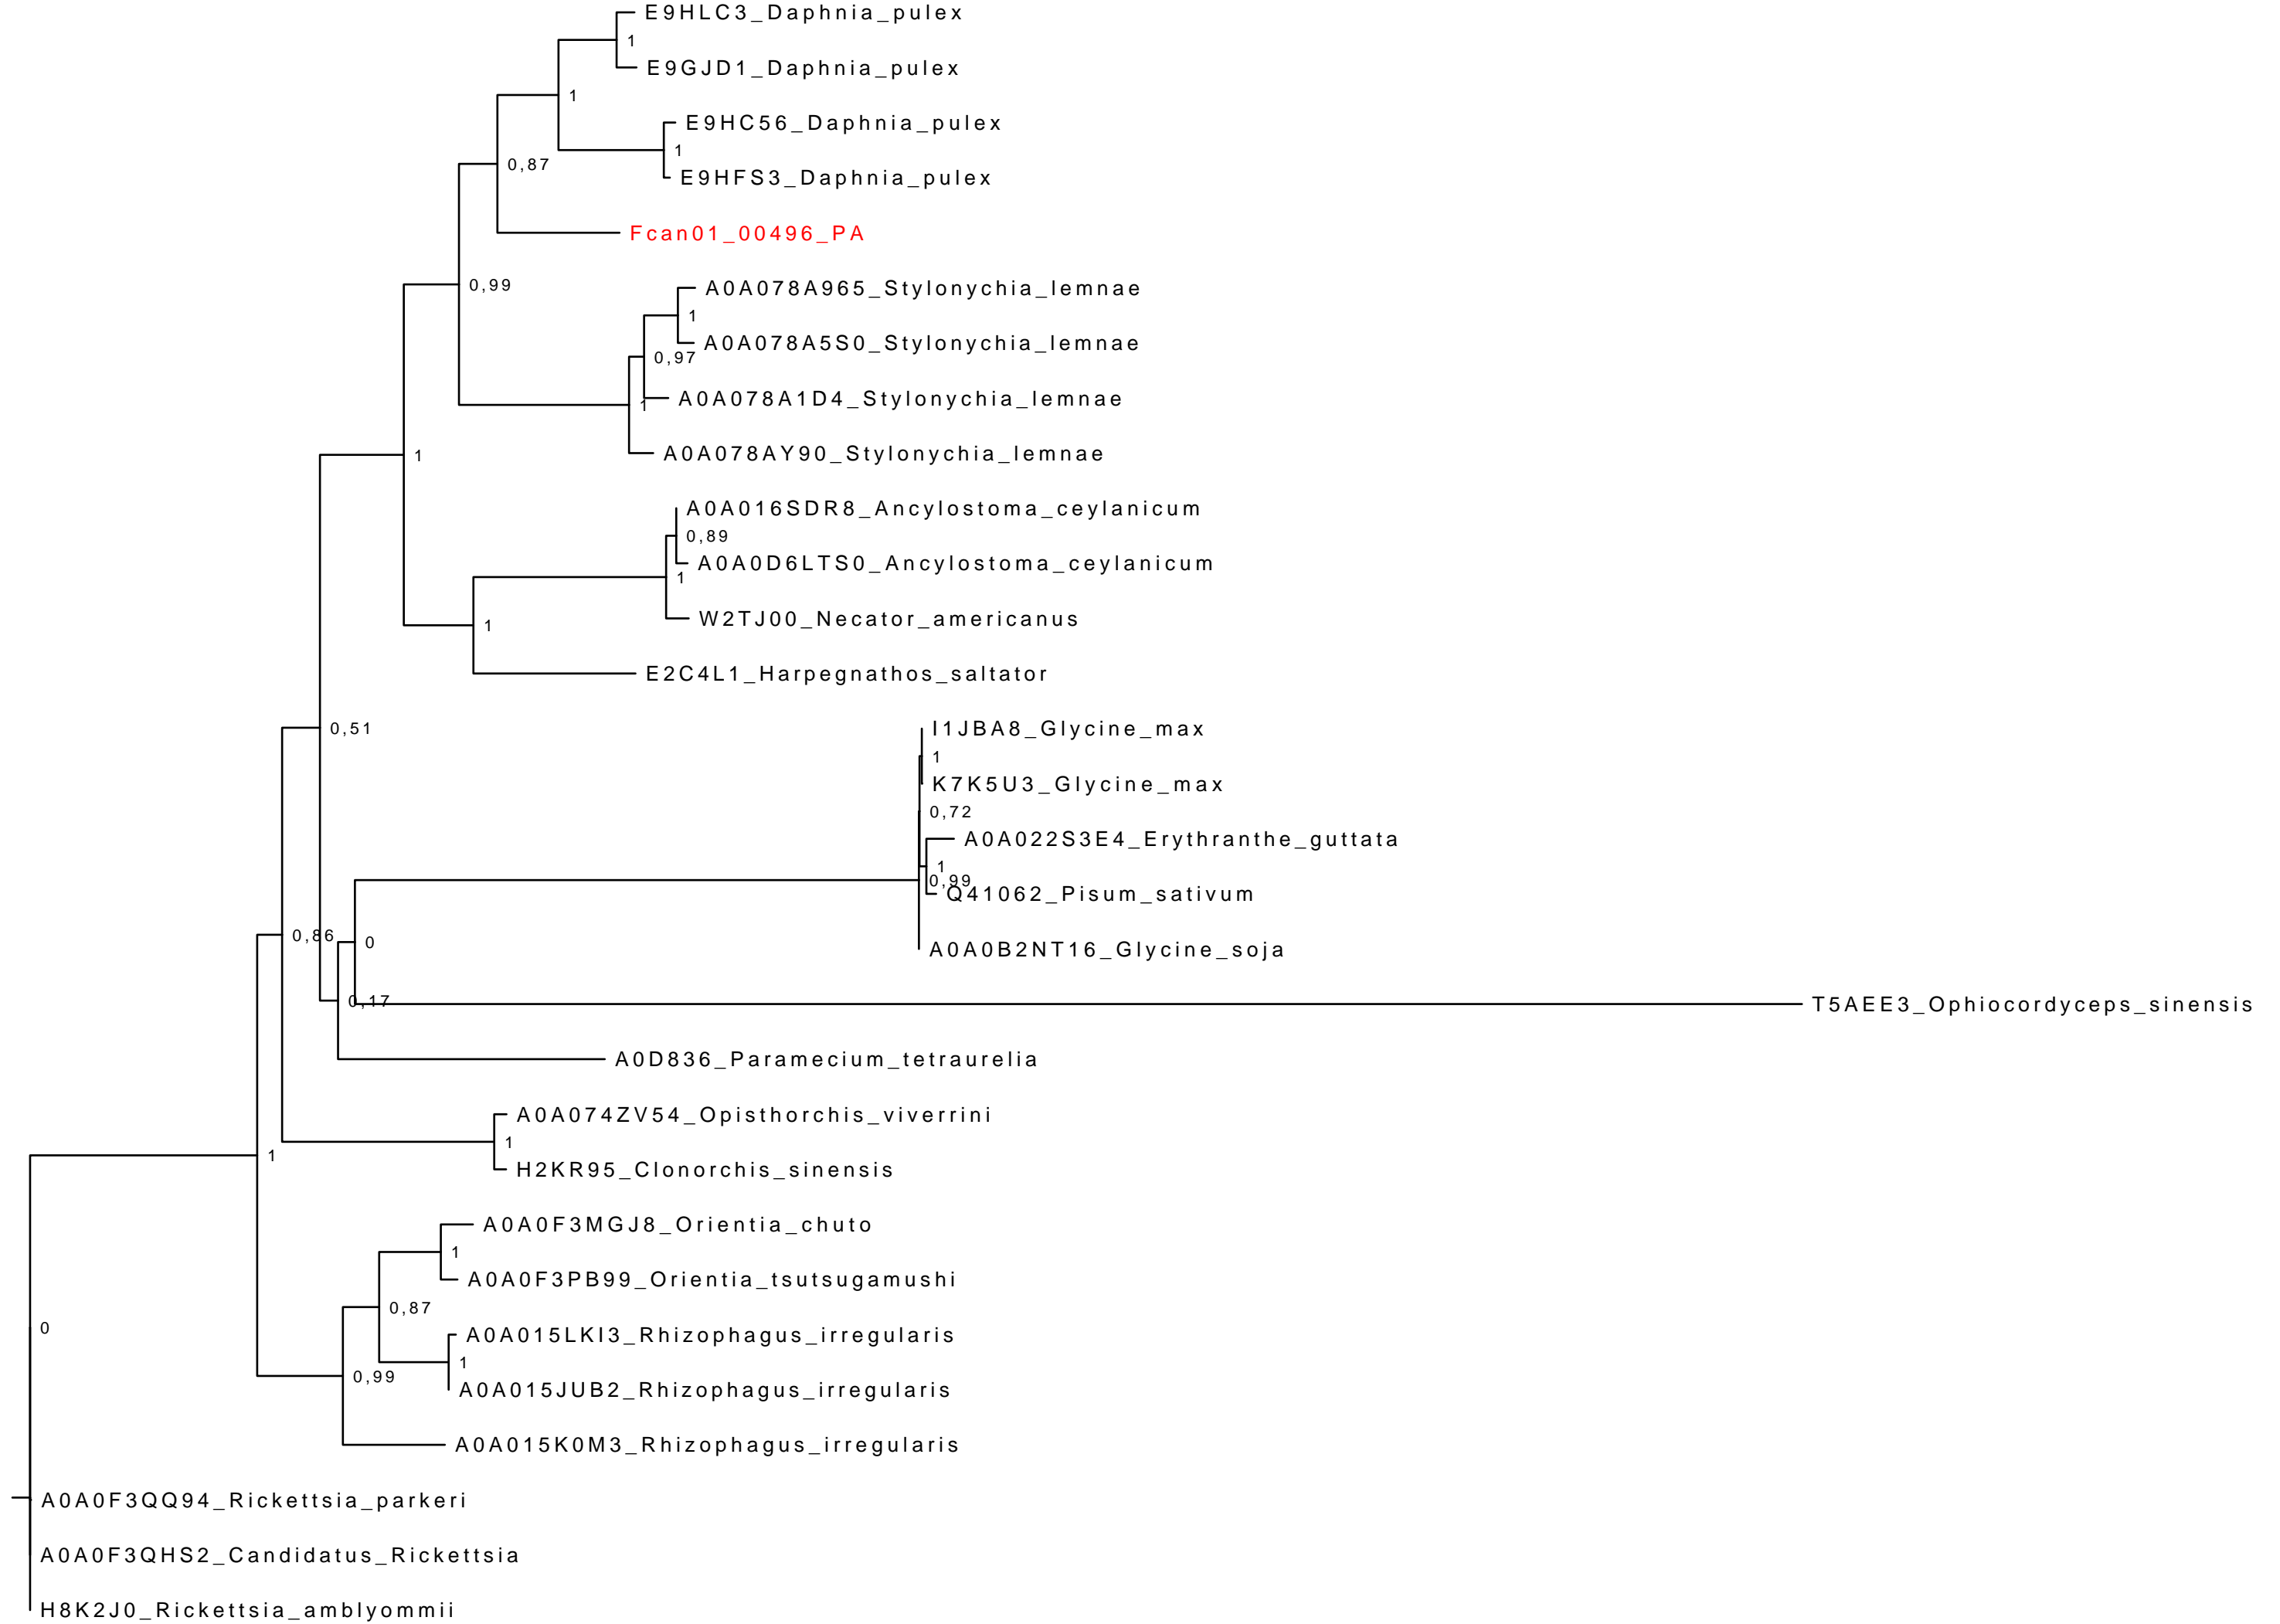

2.0

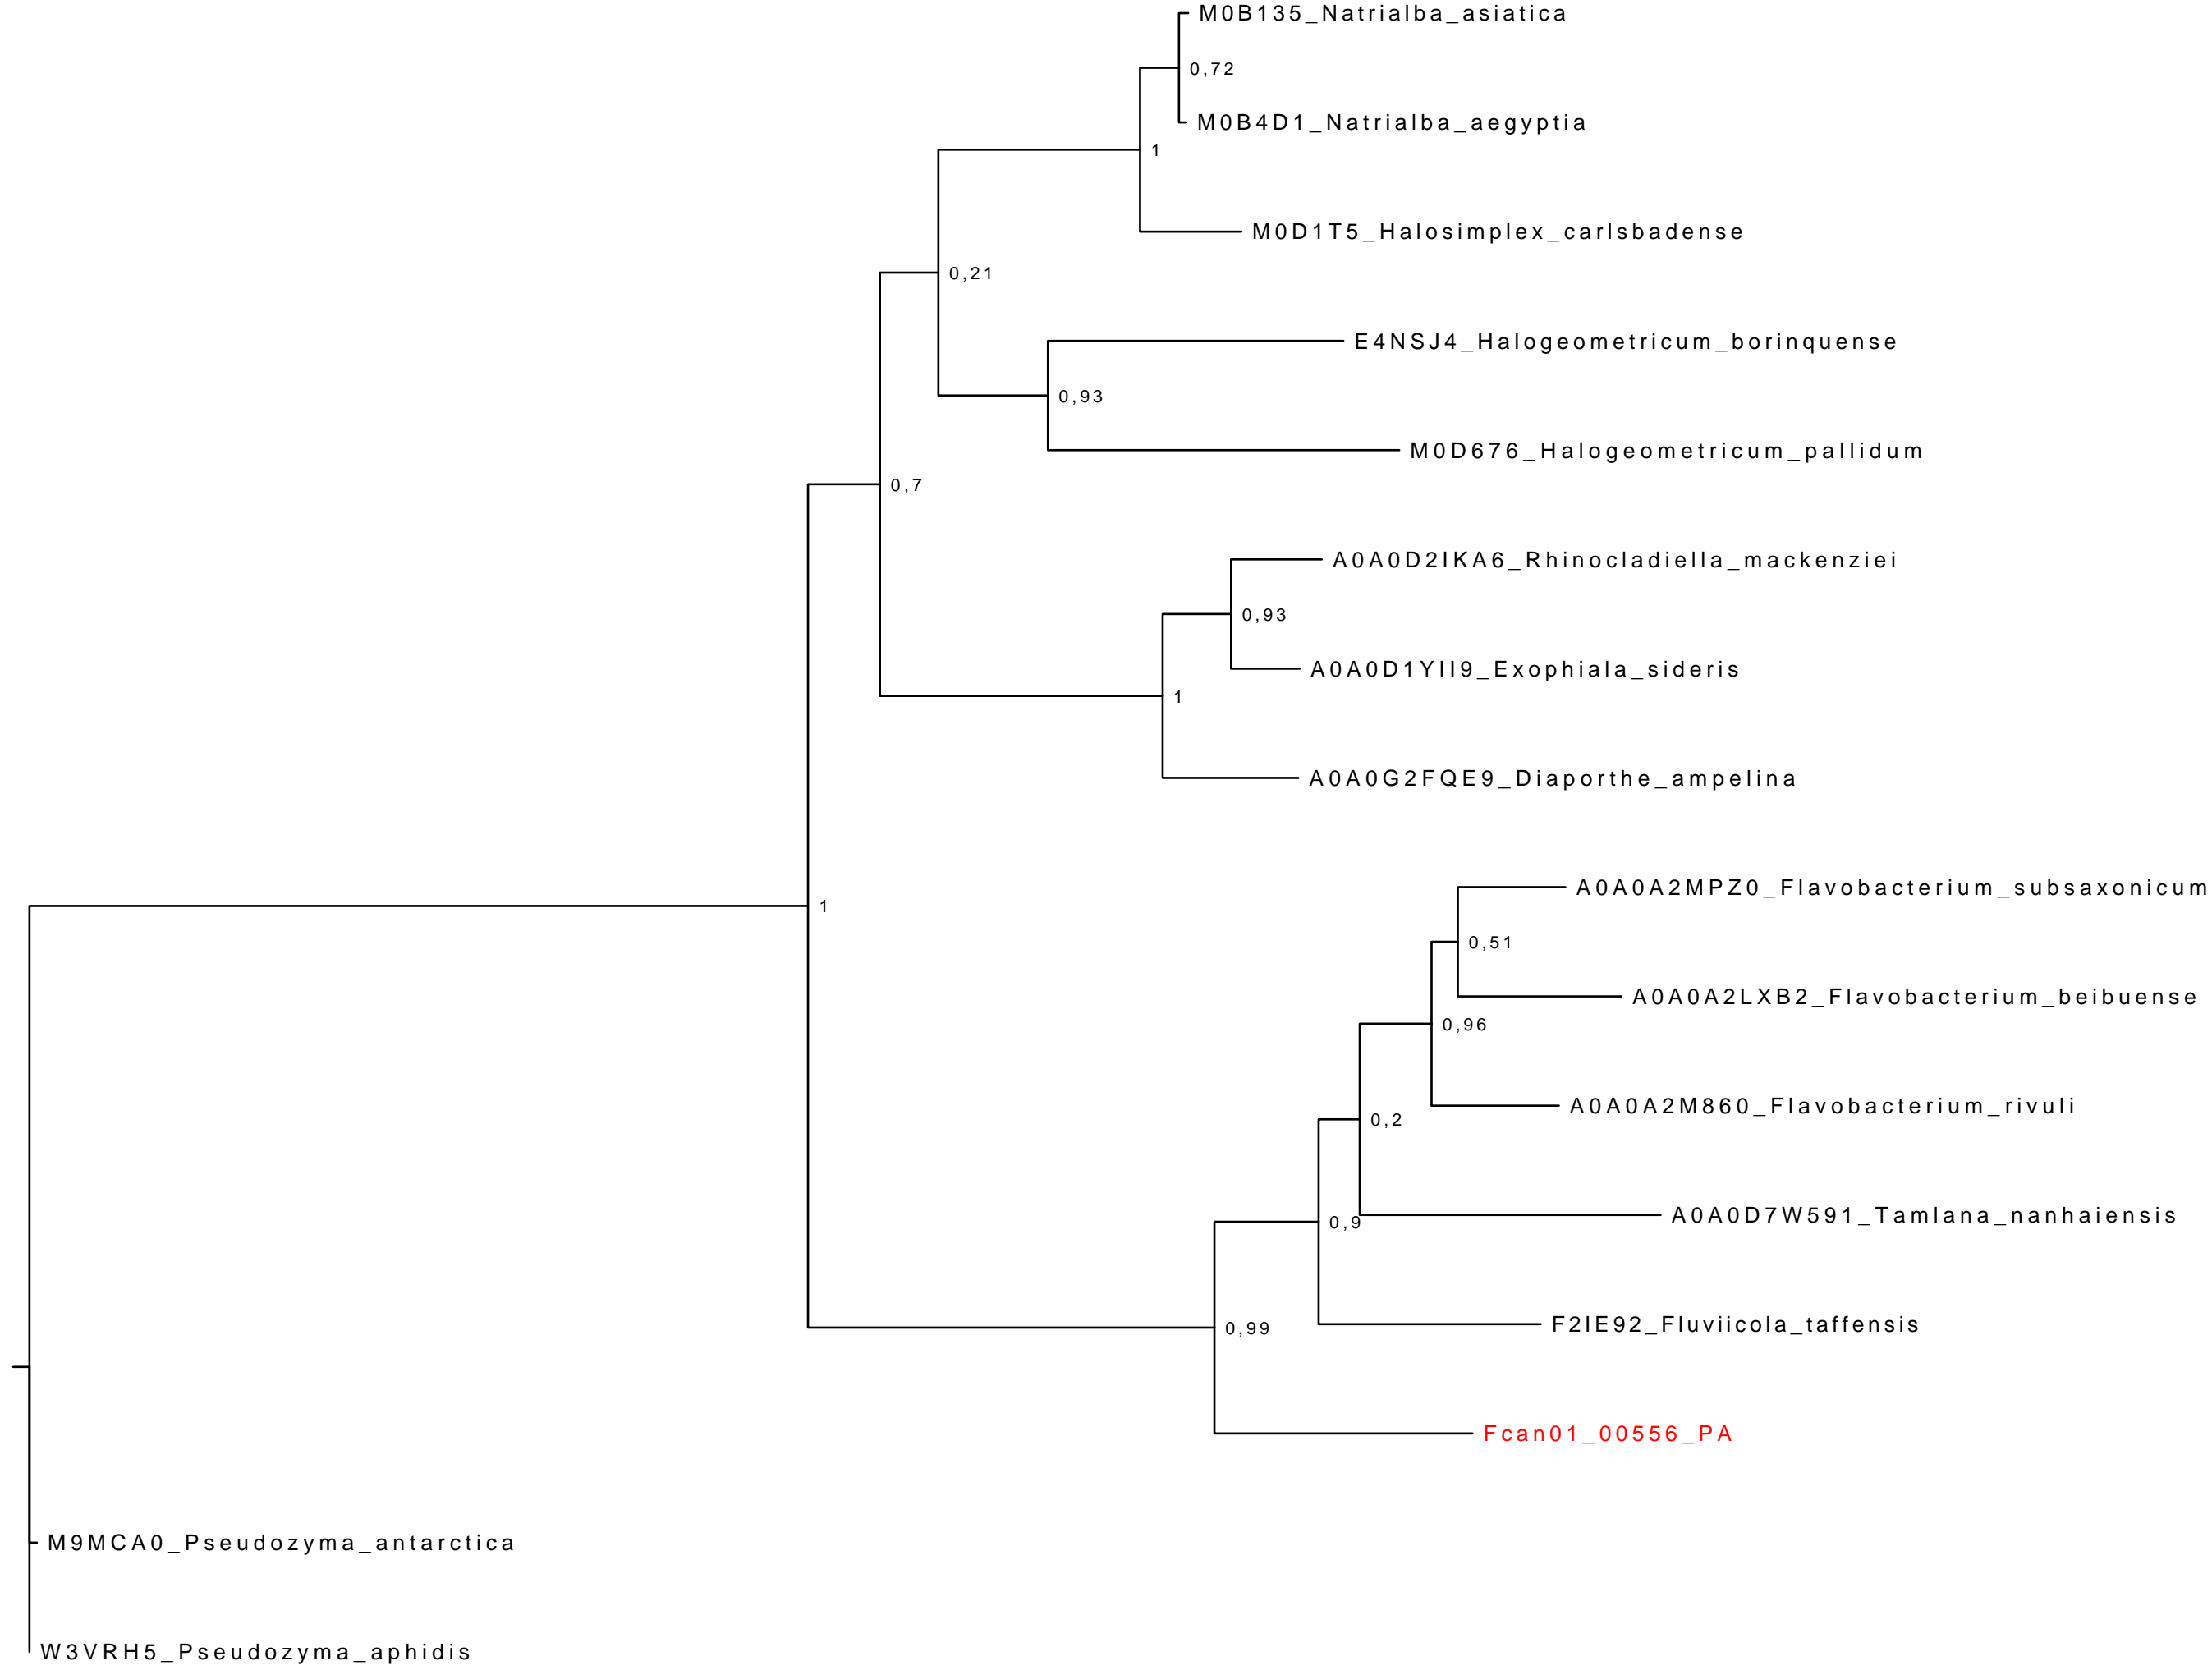

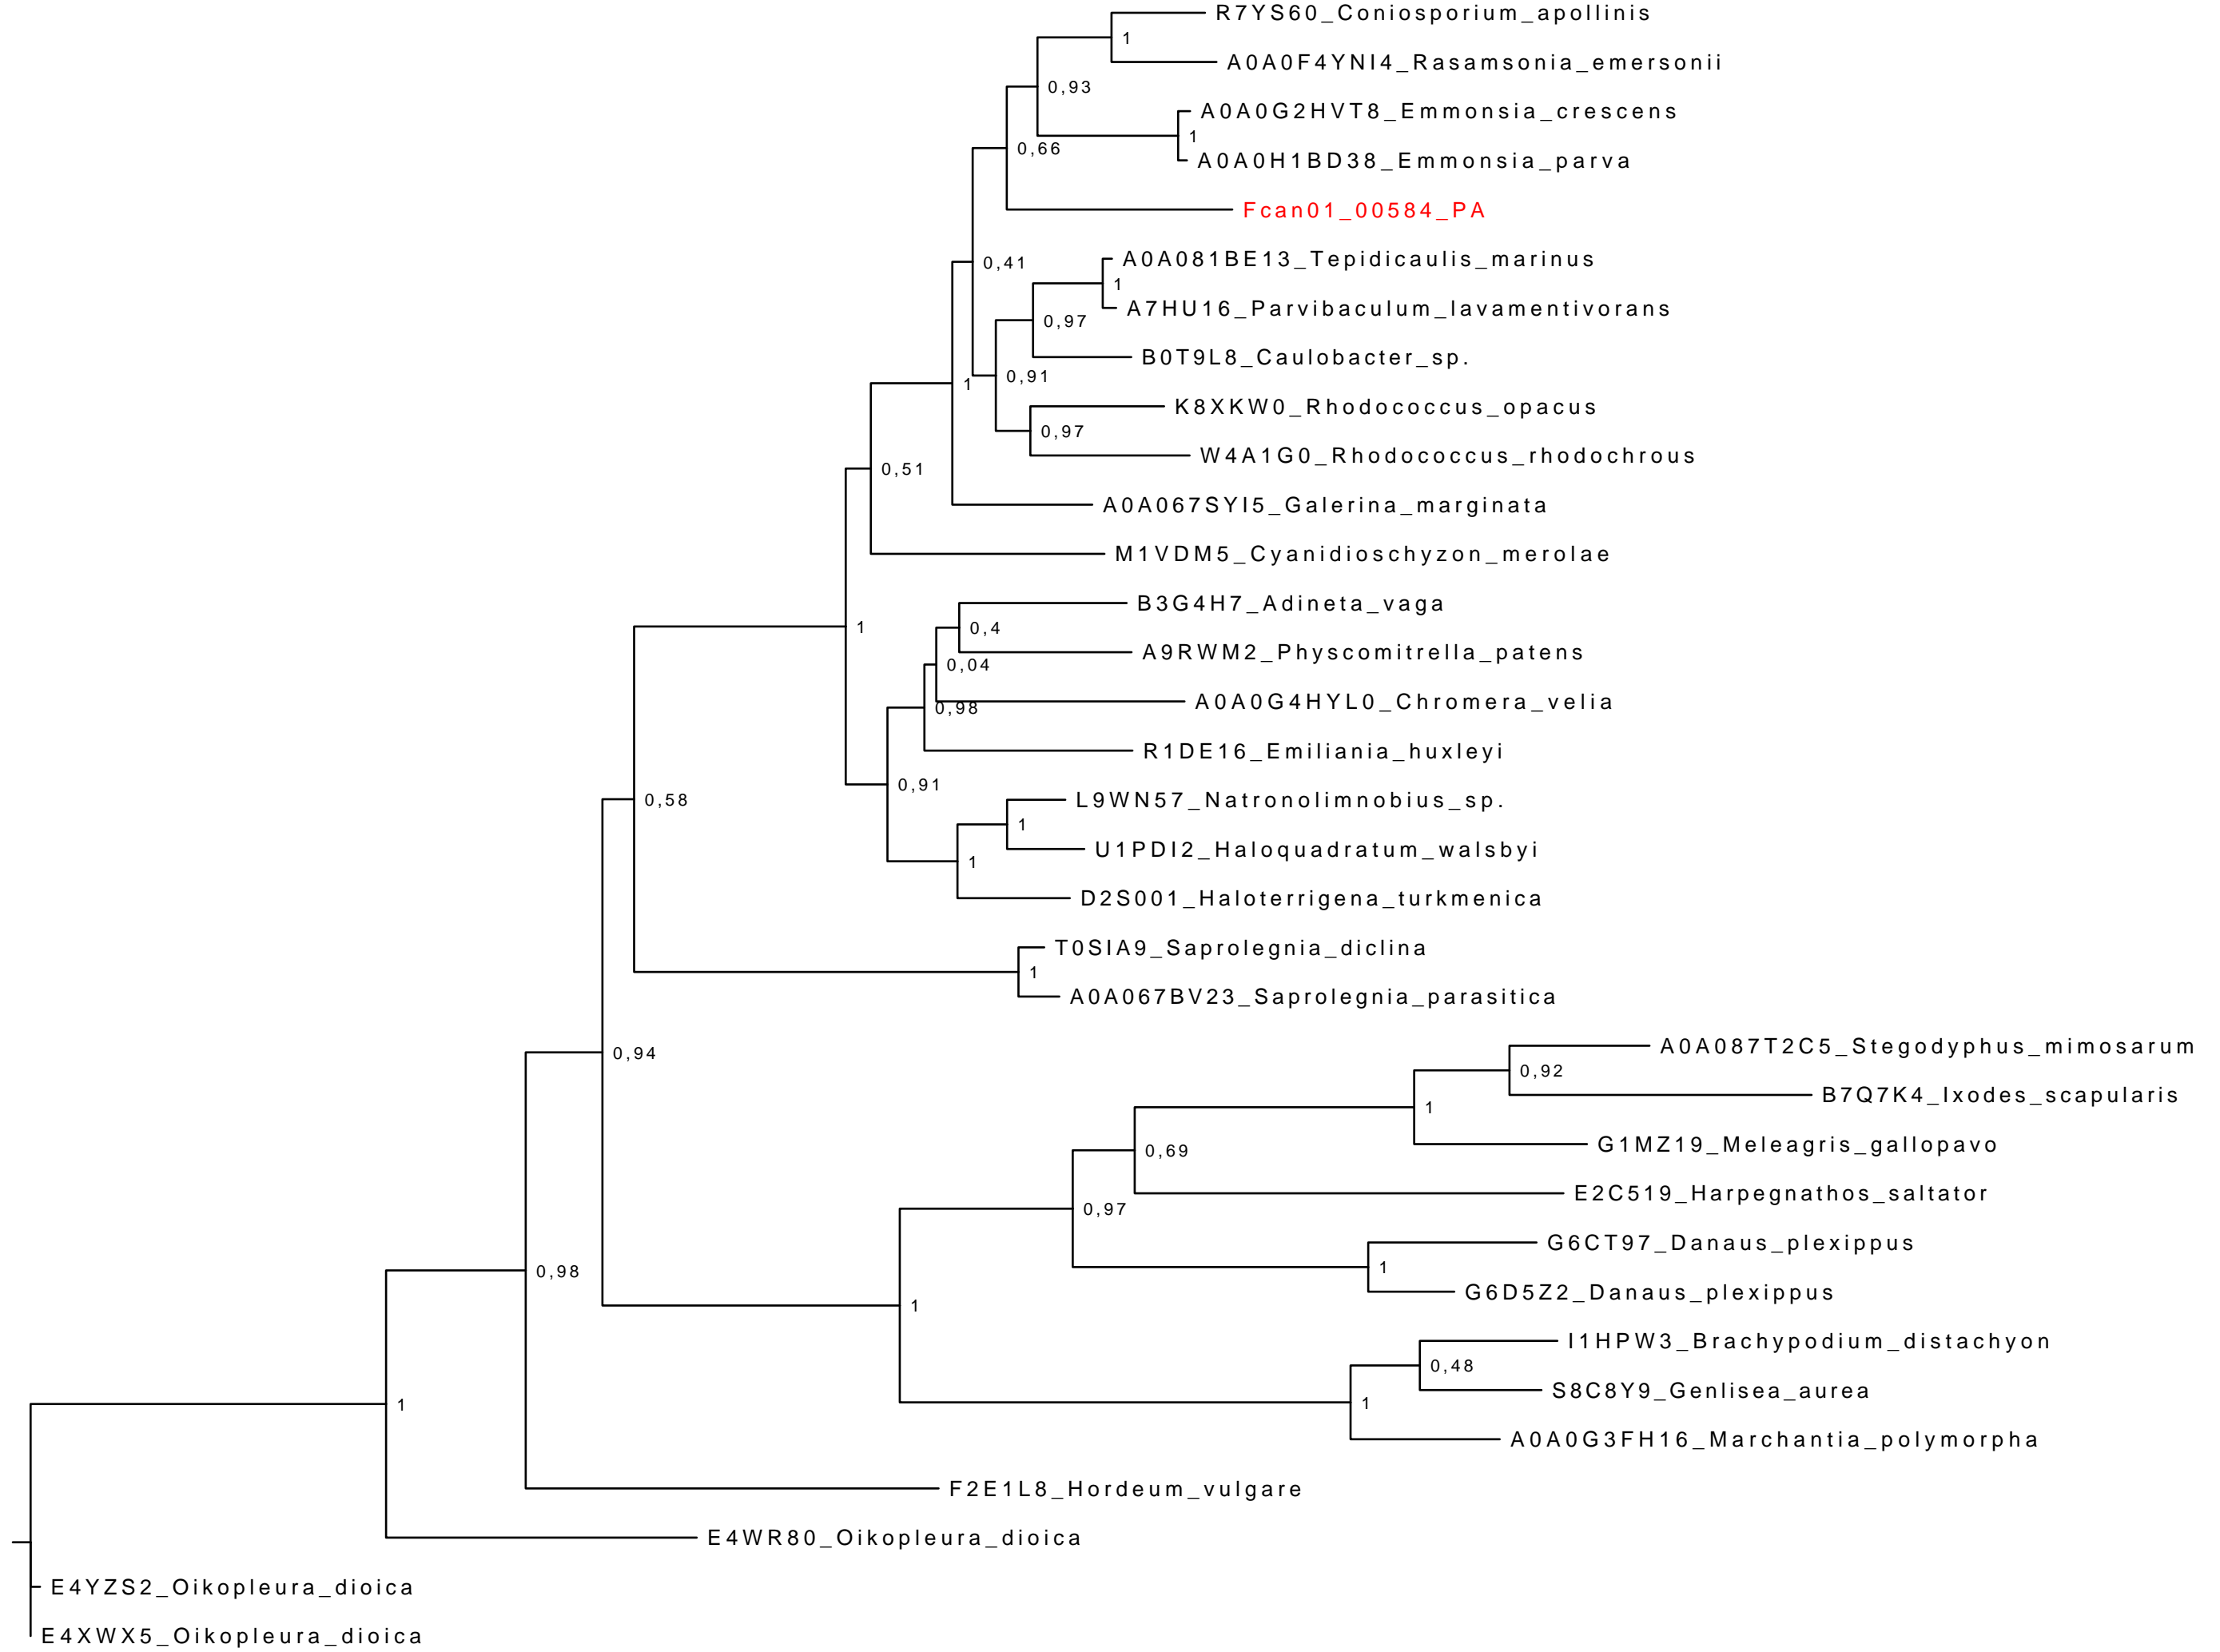



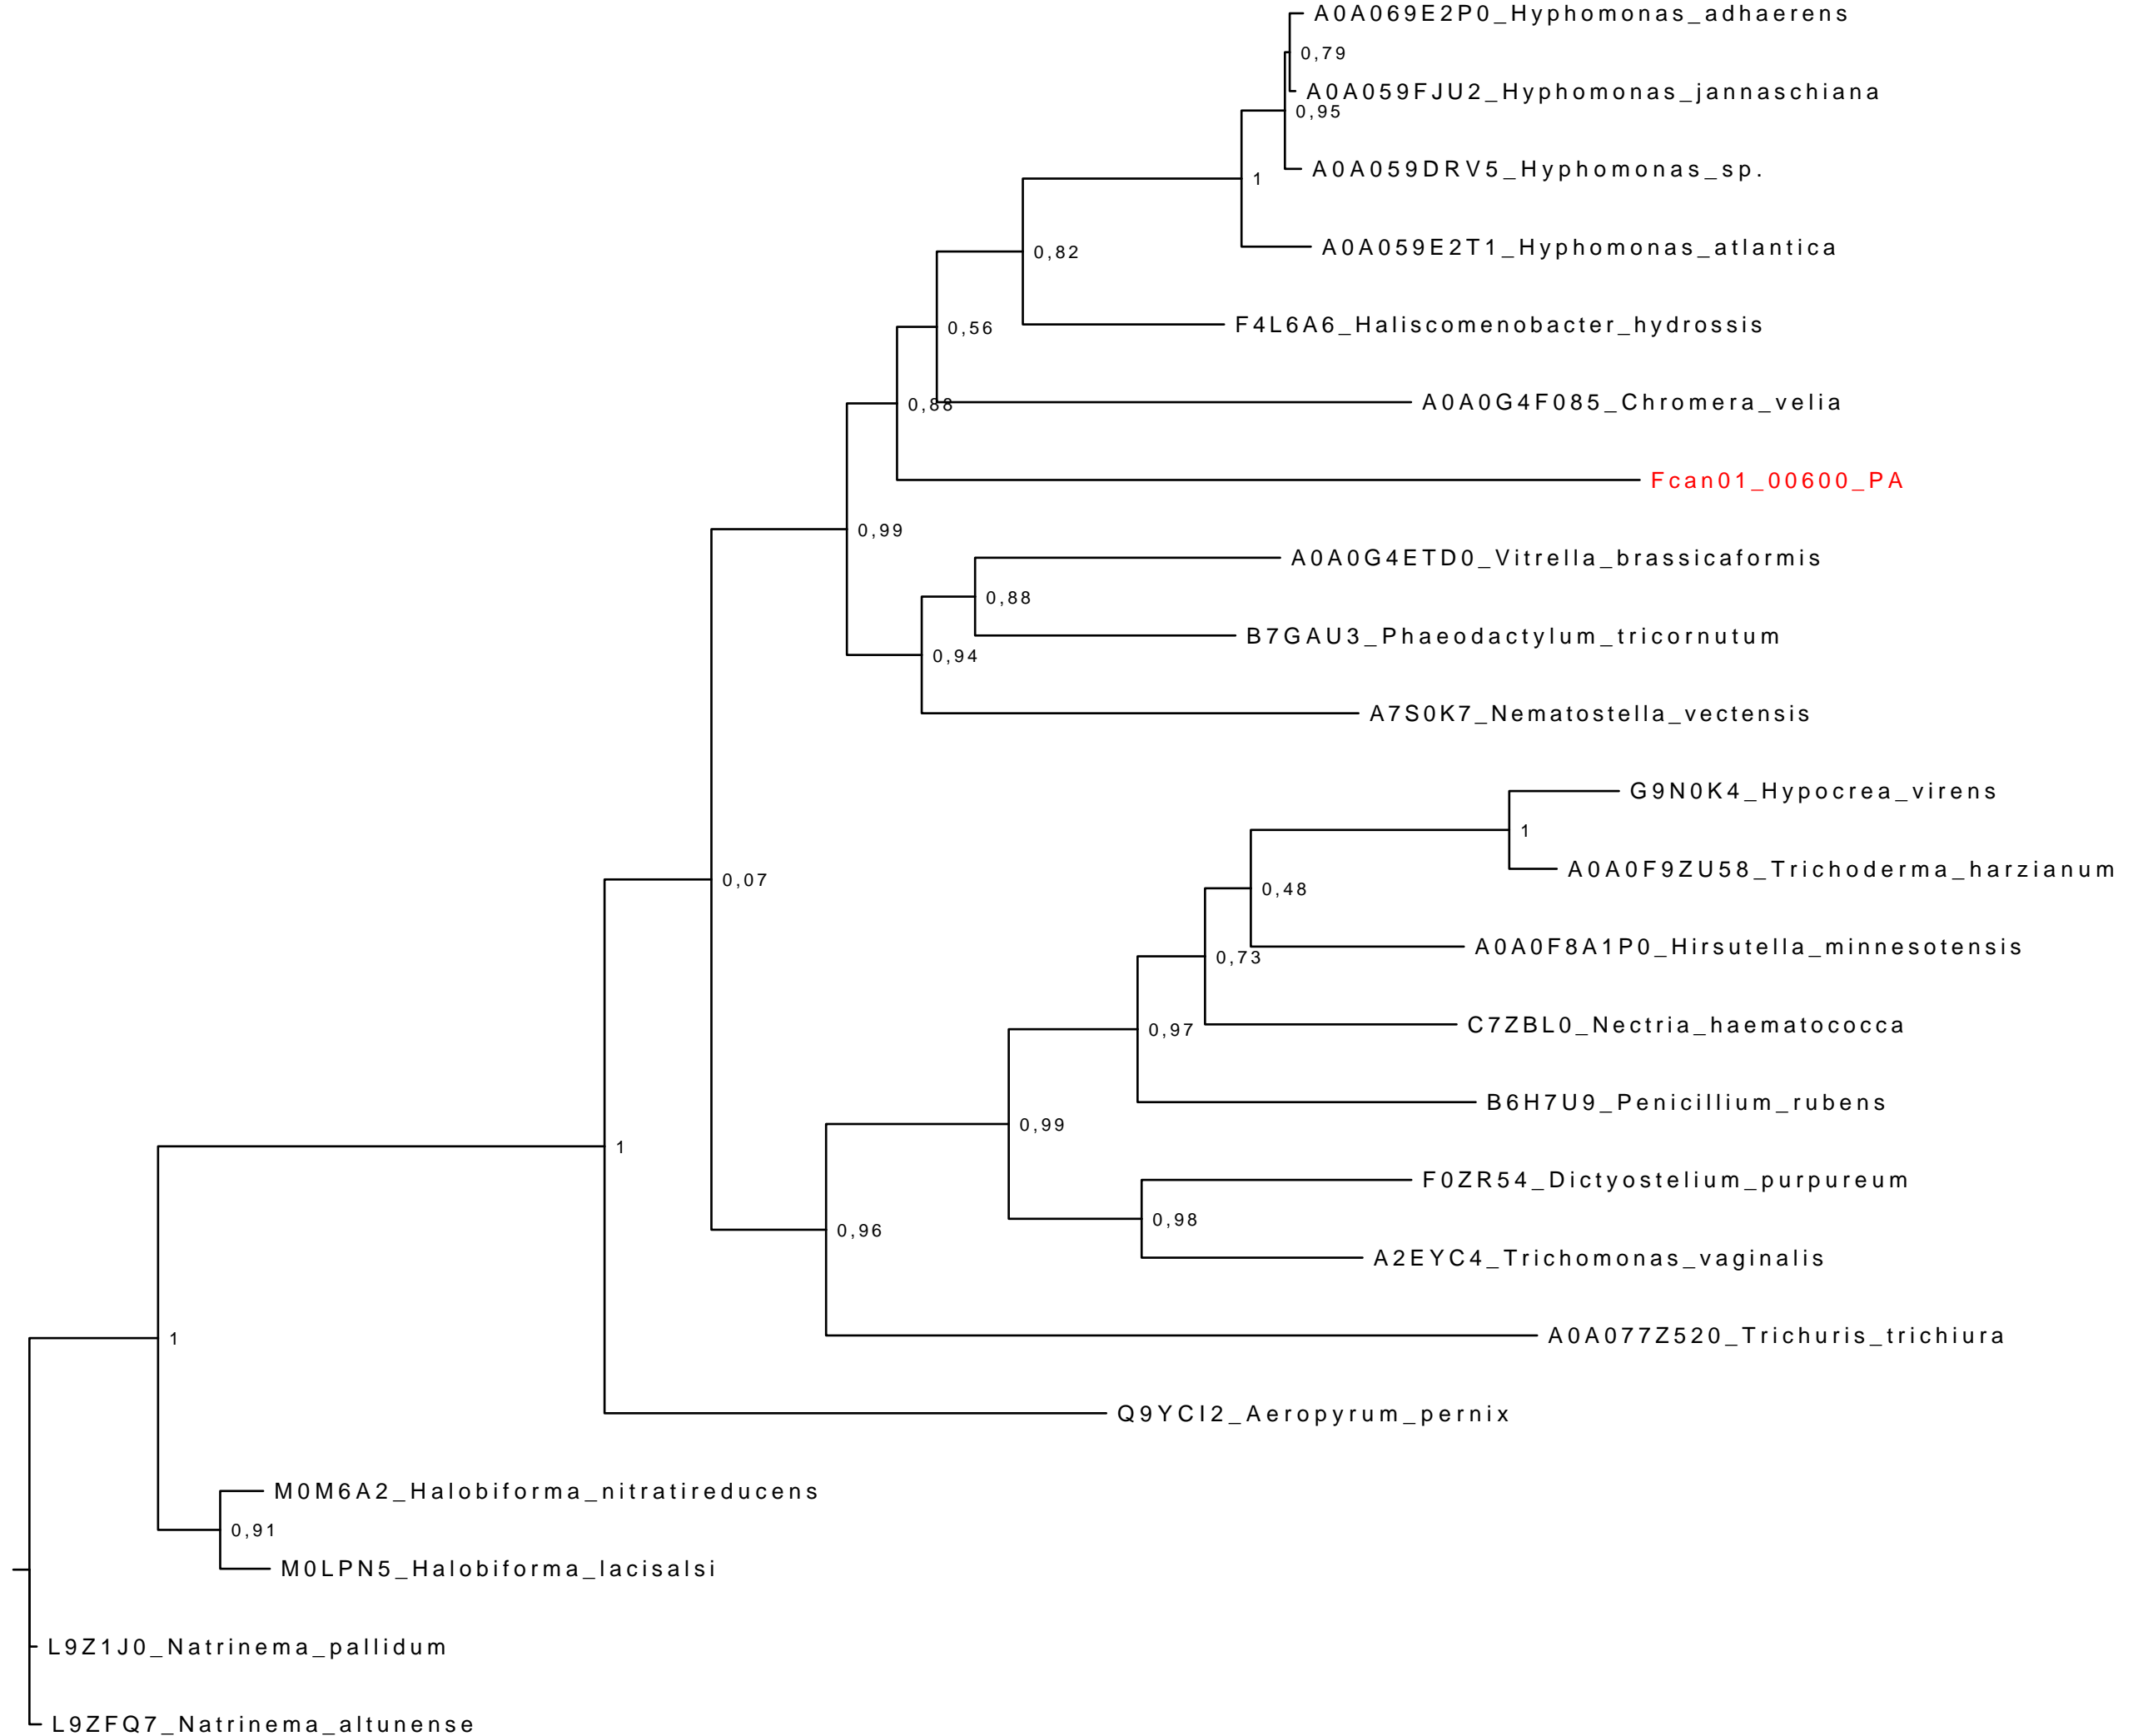

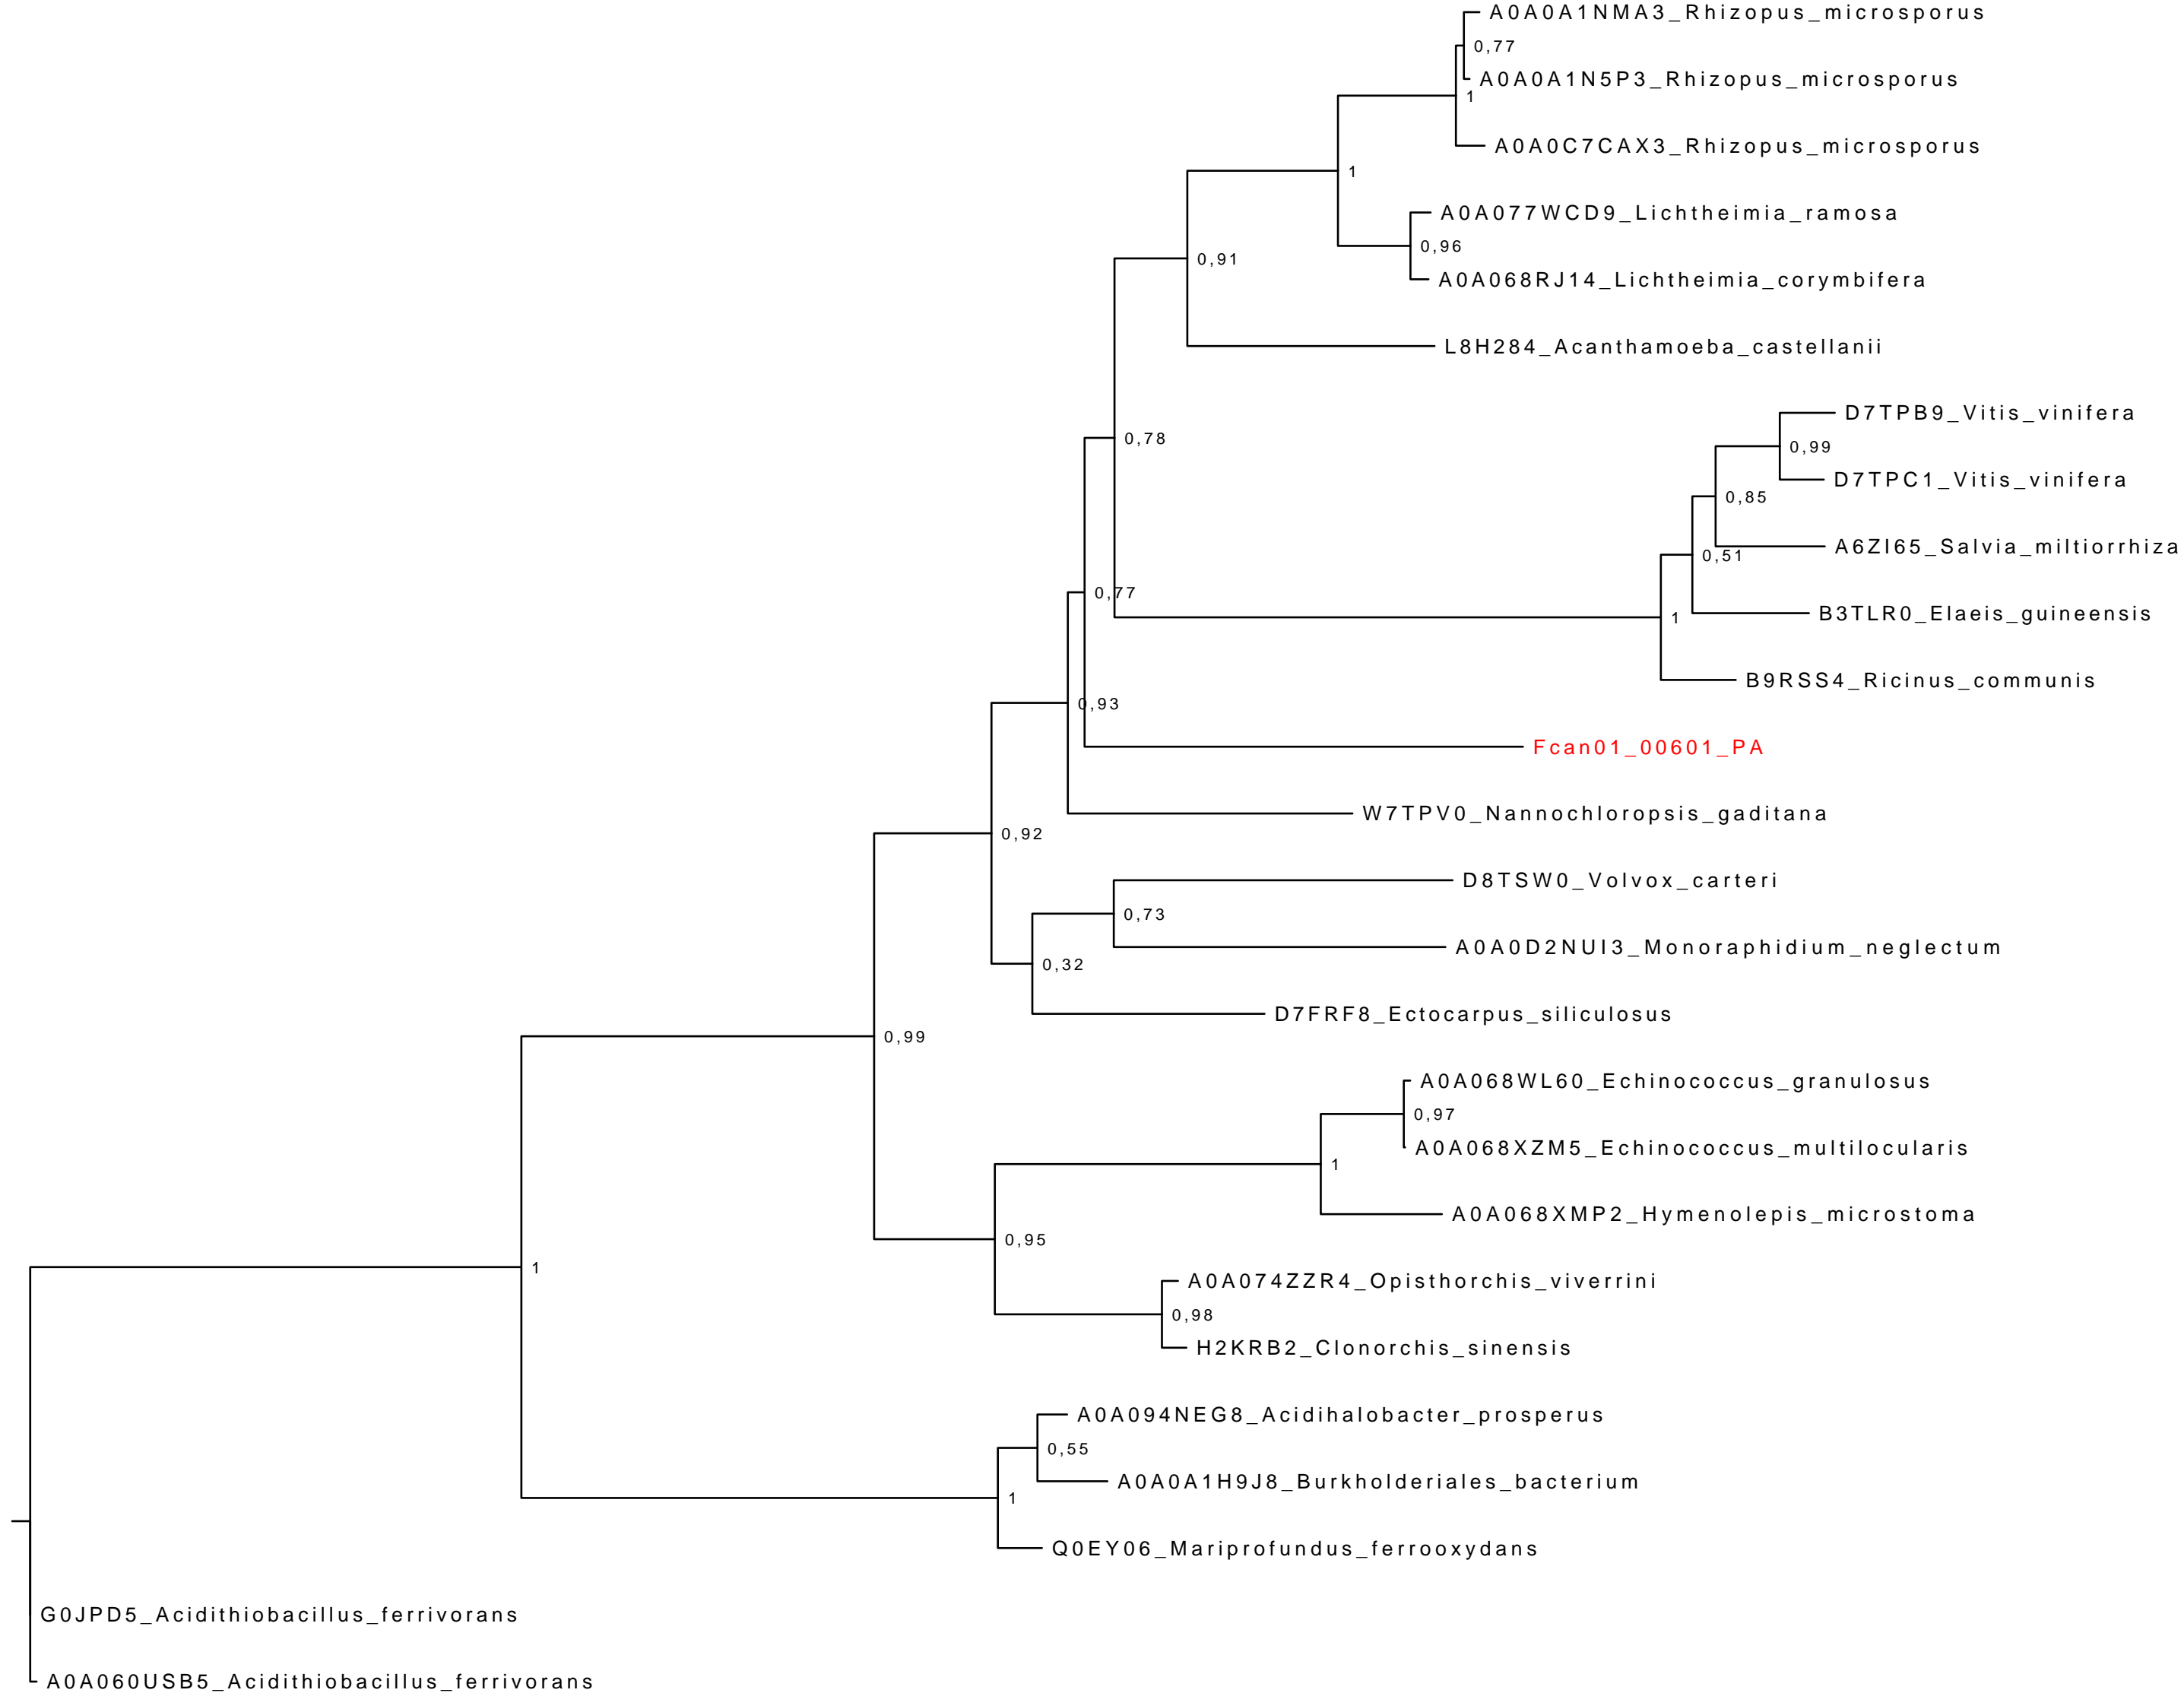

0.4

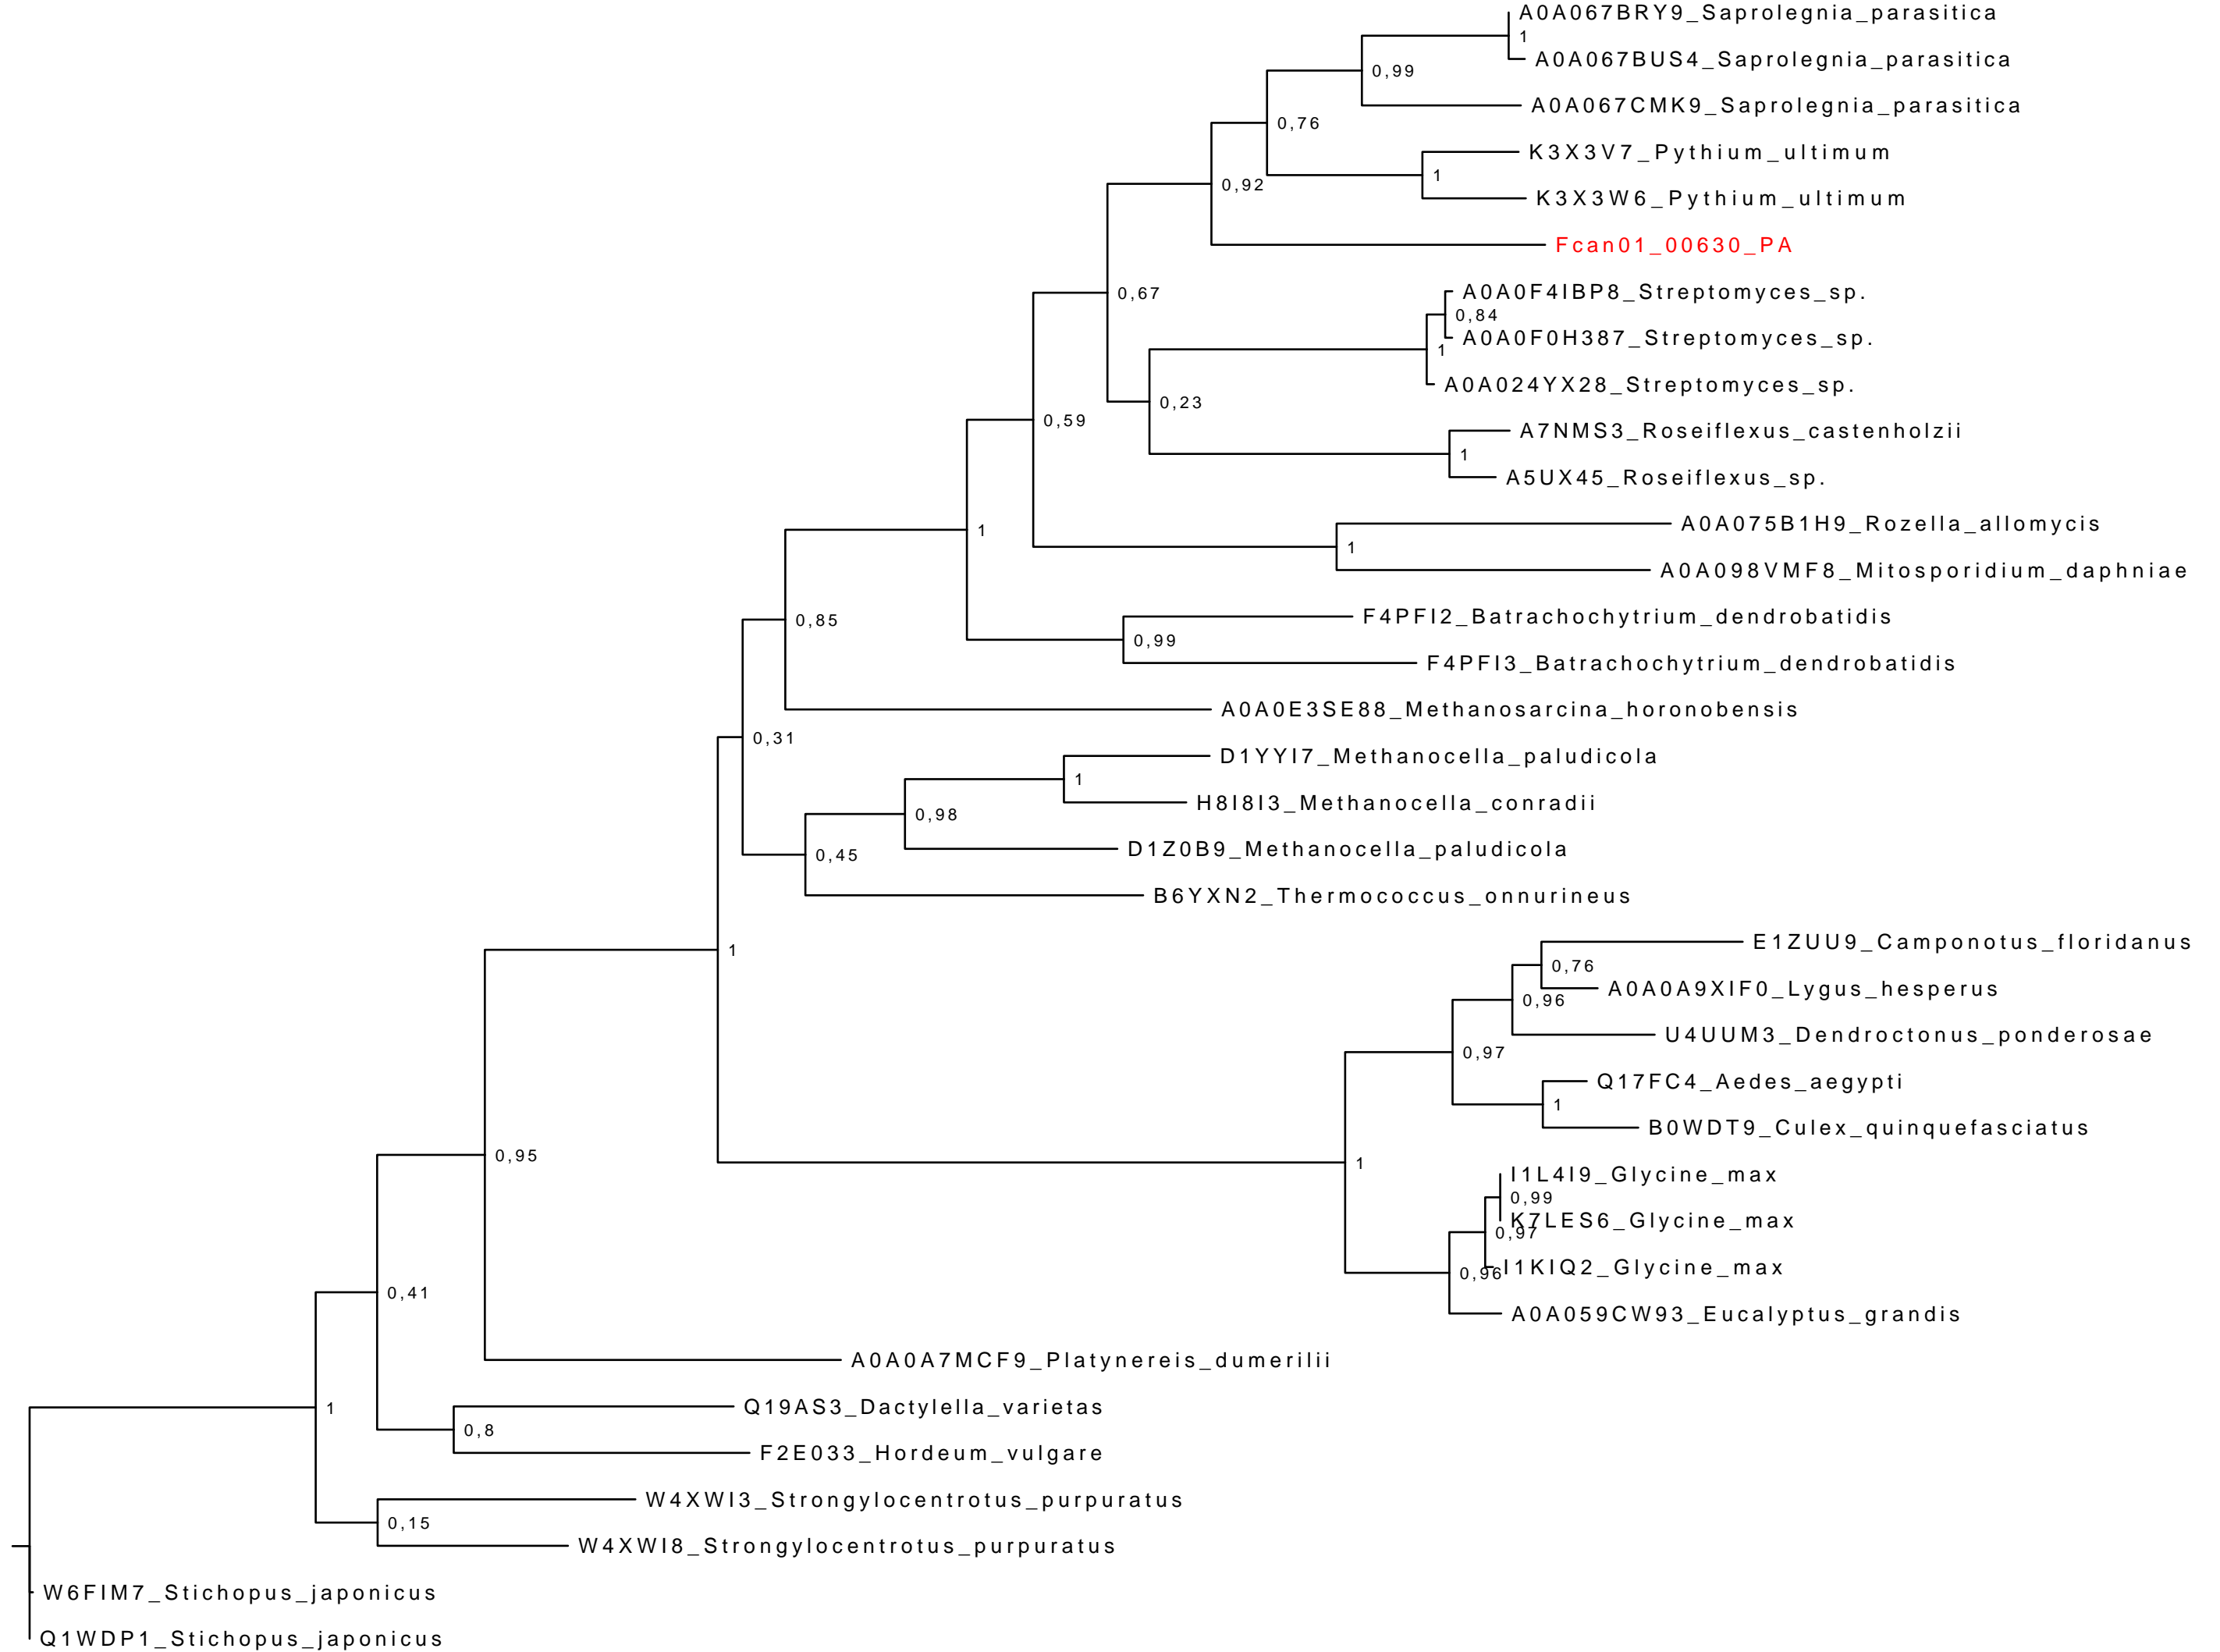

0.5

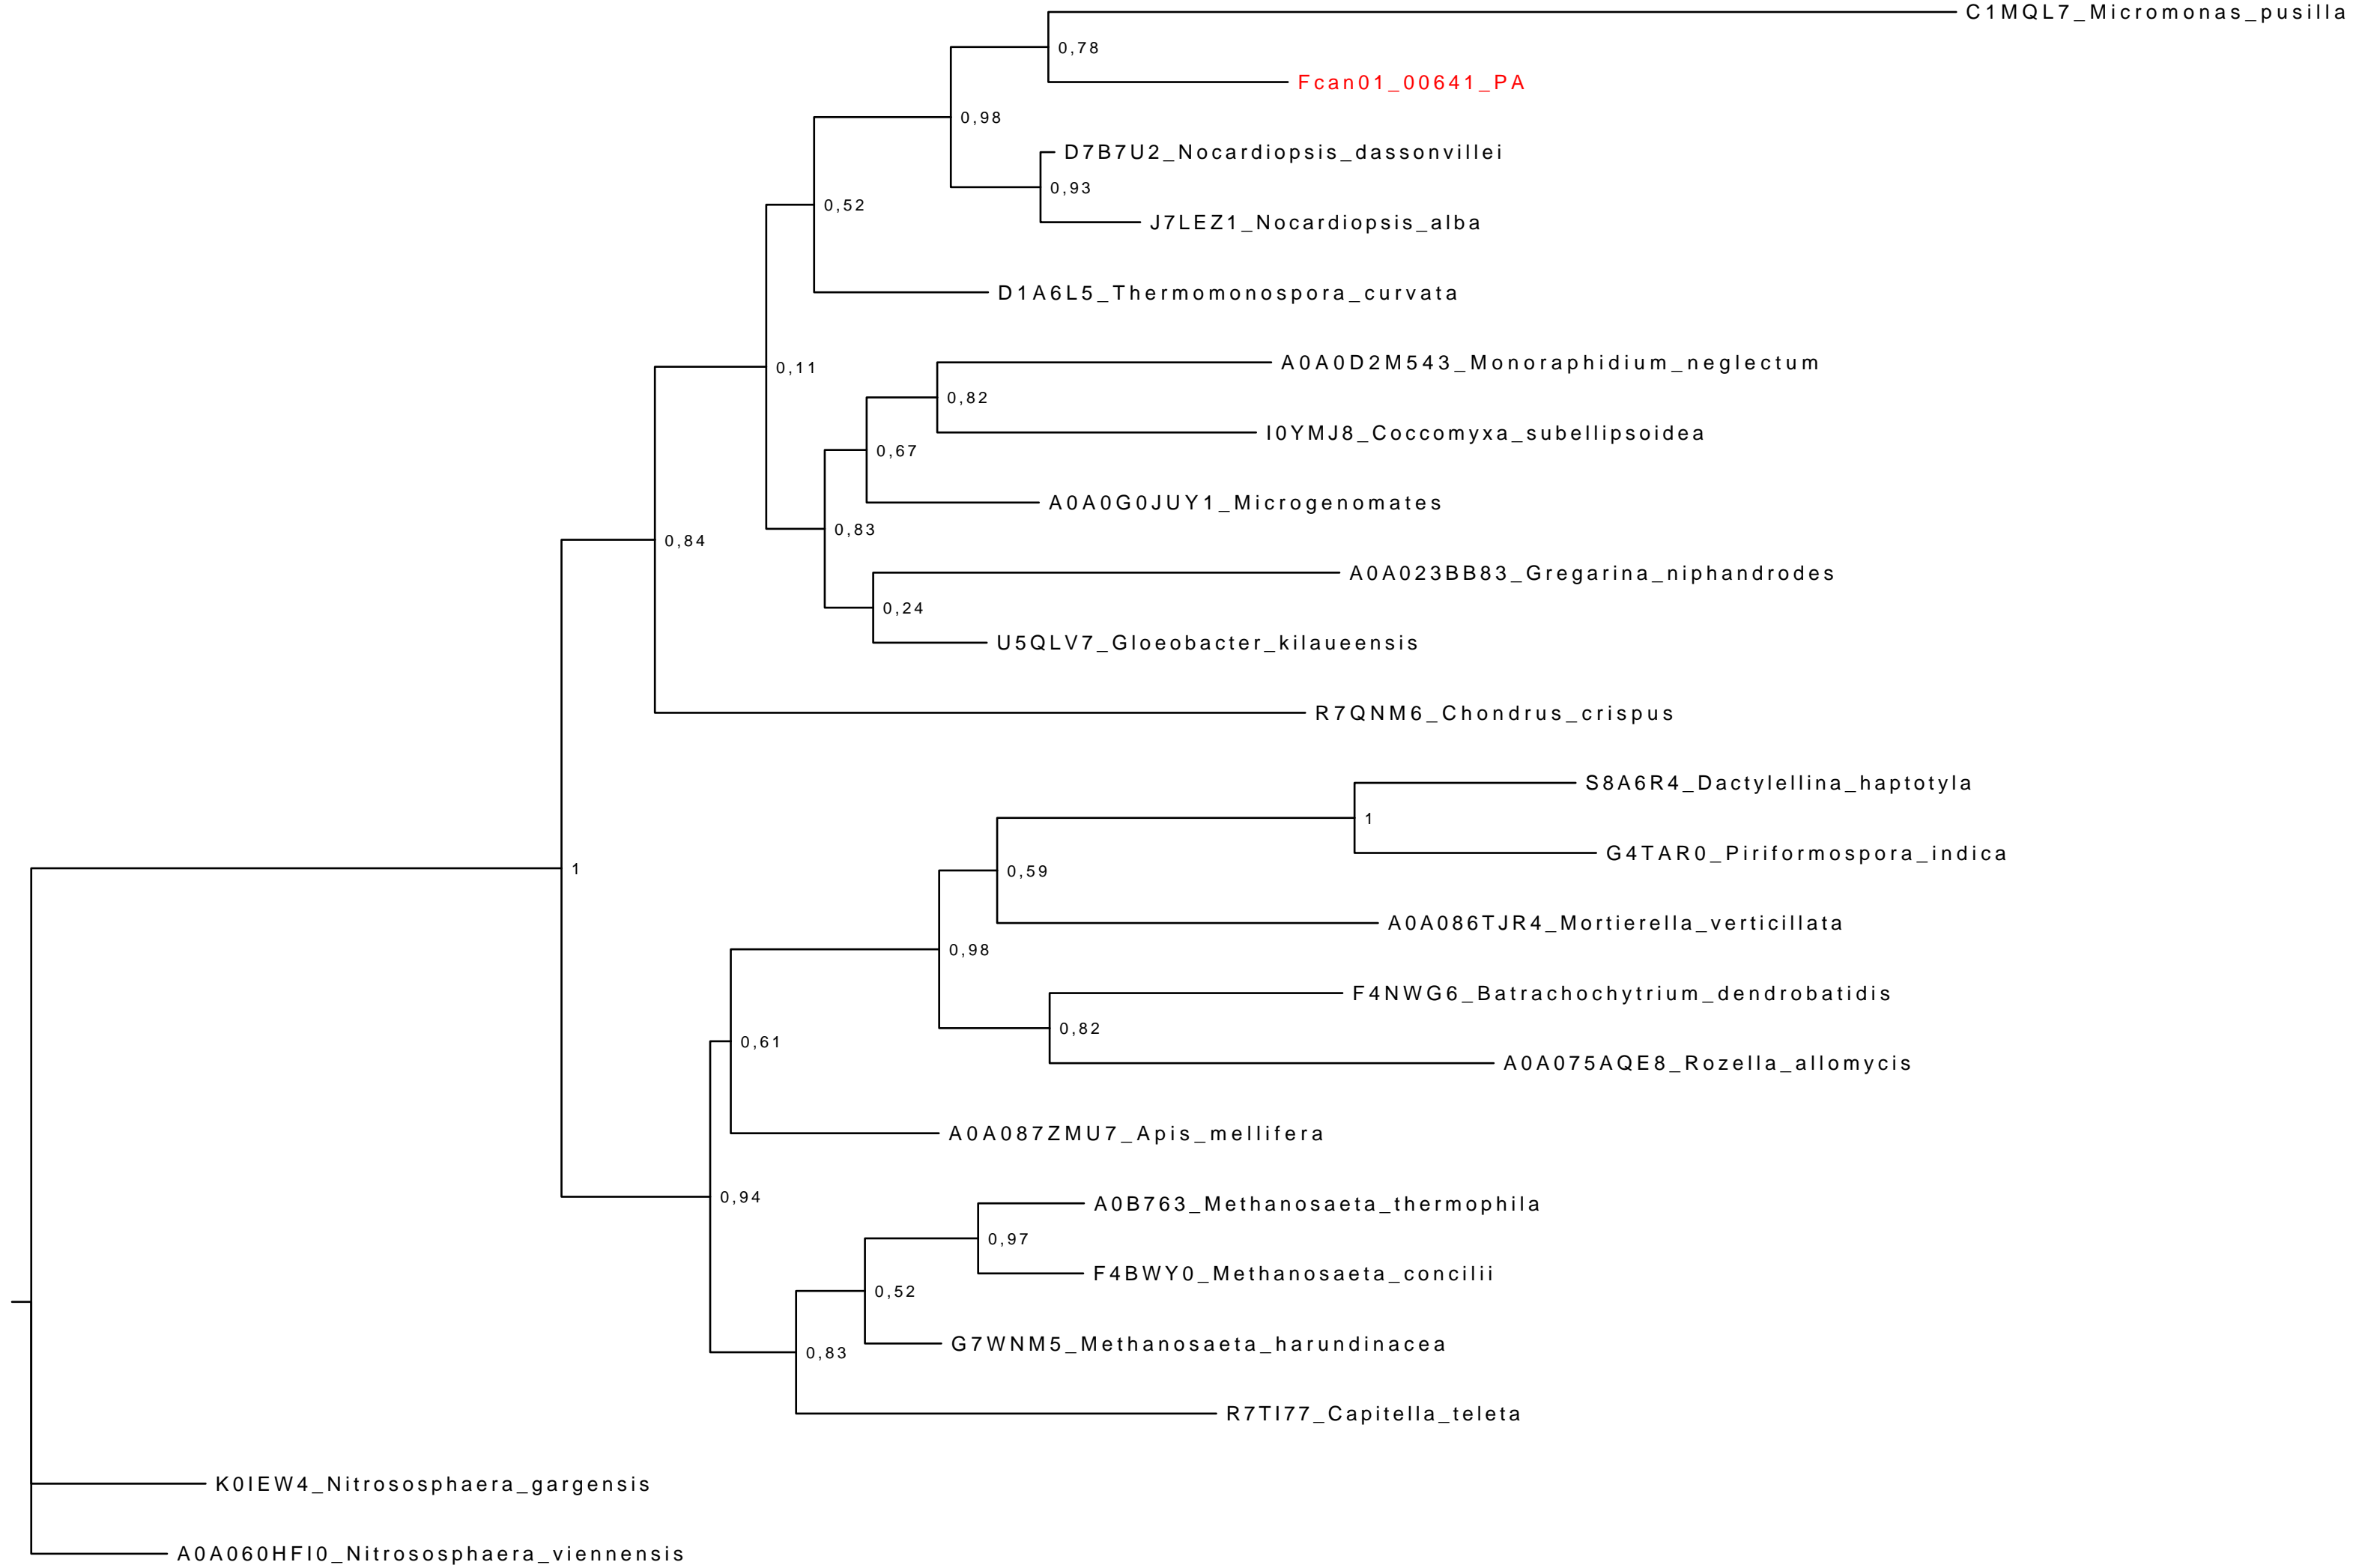

0.4

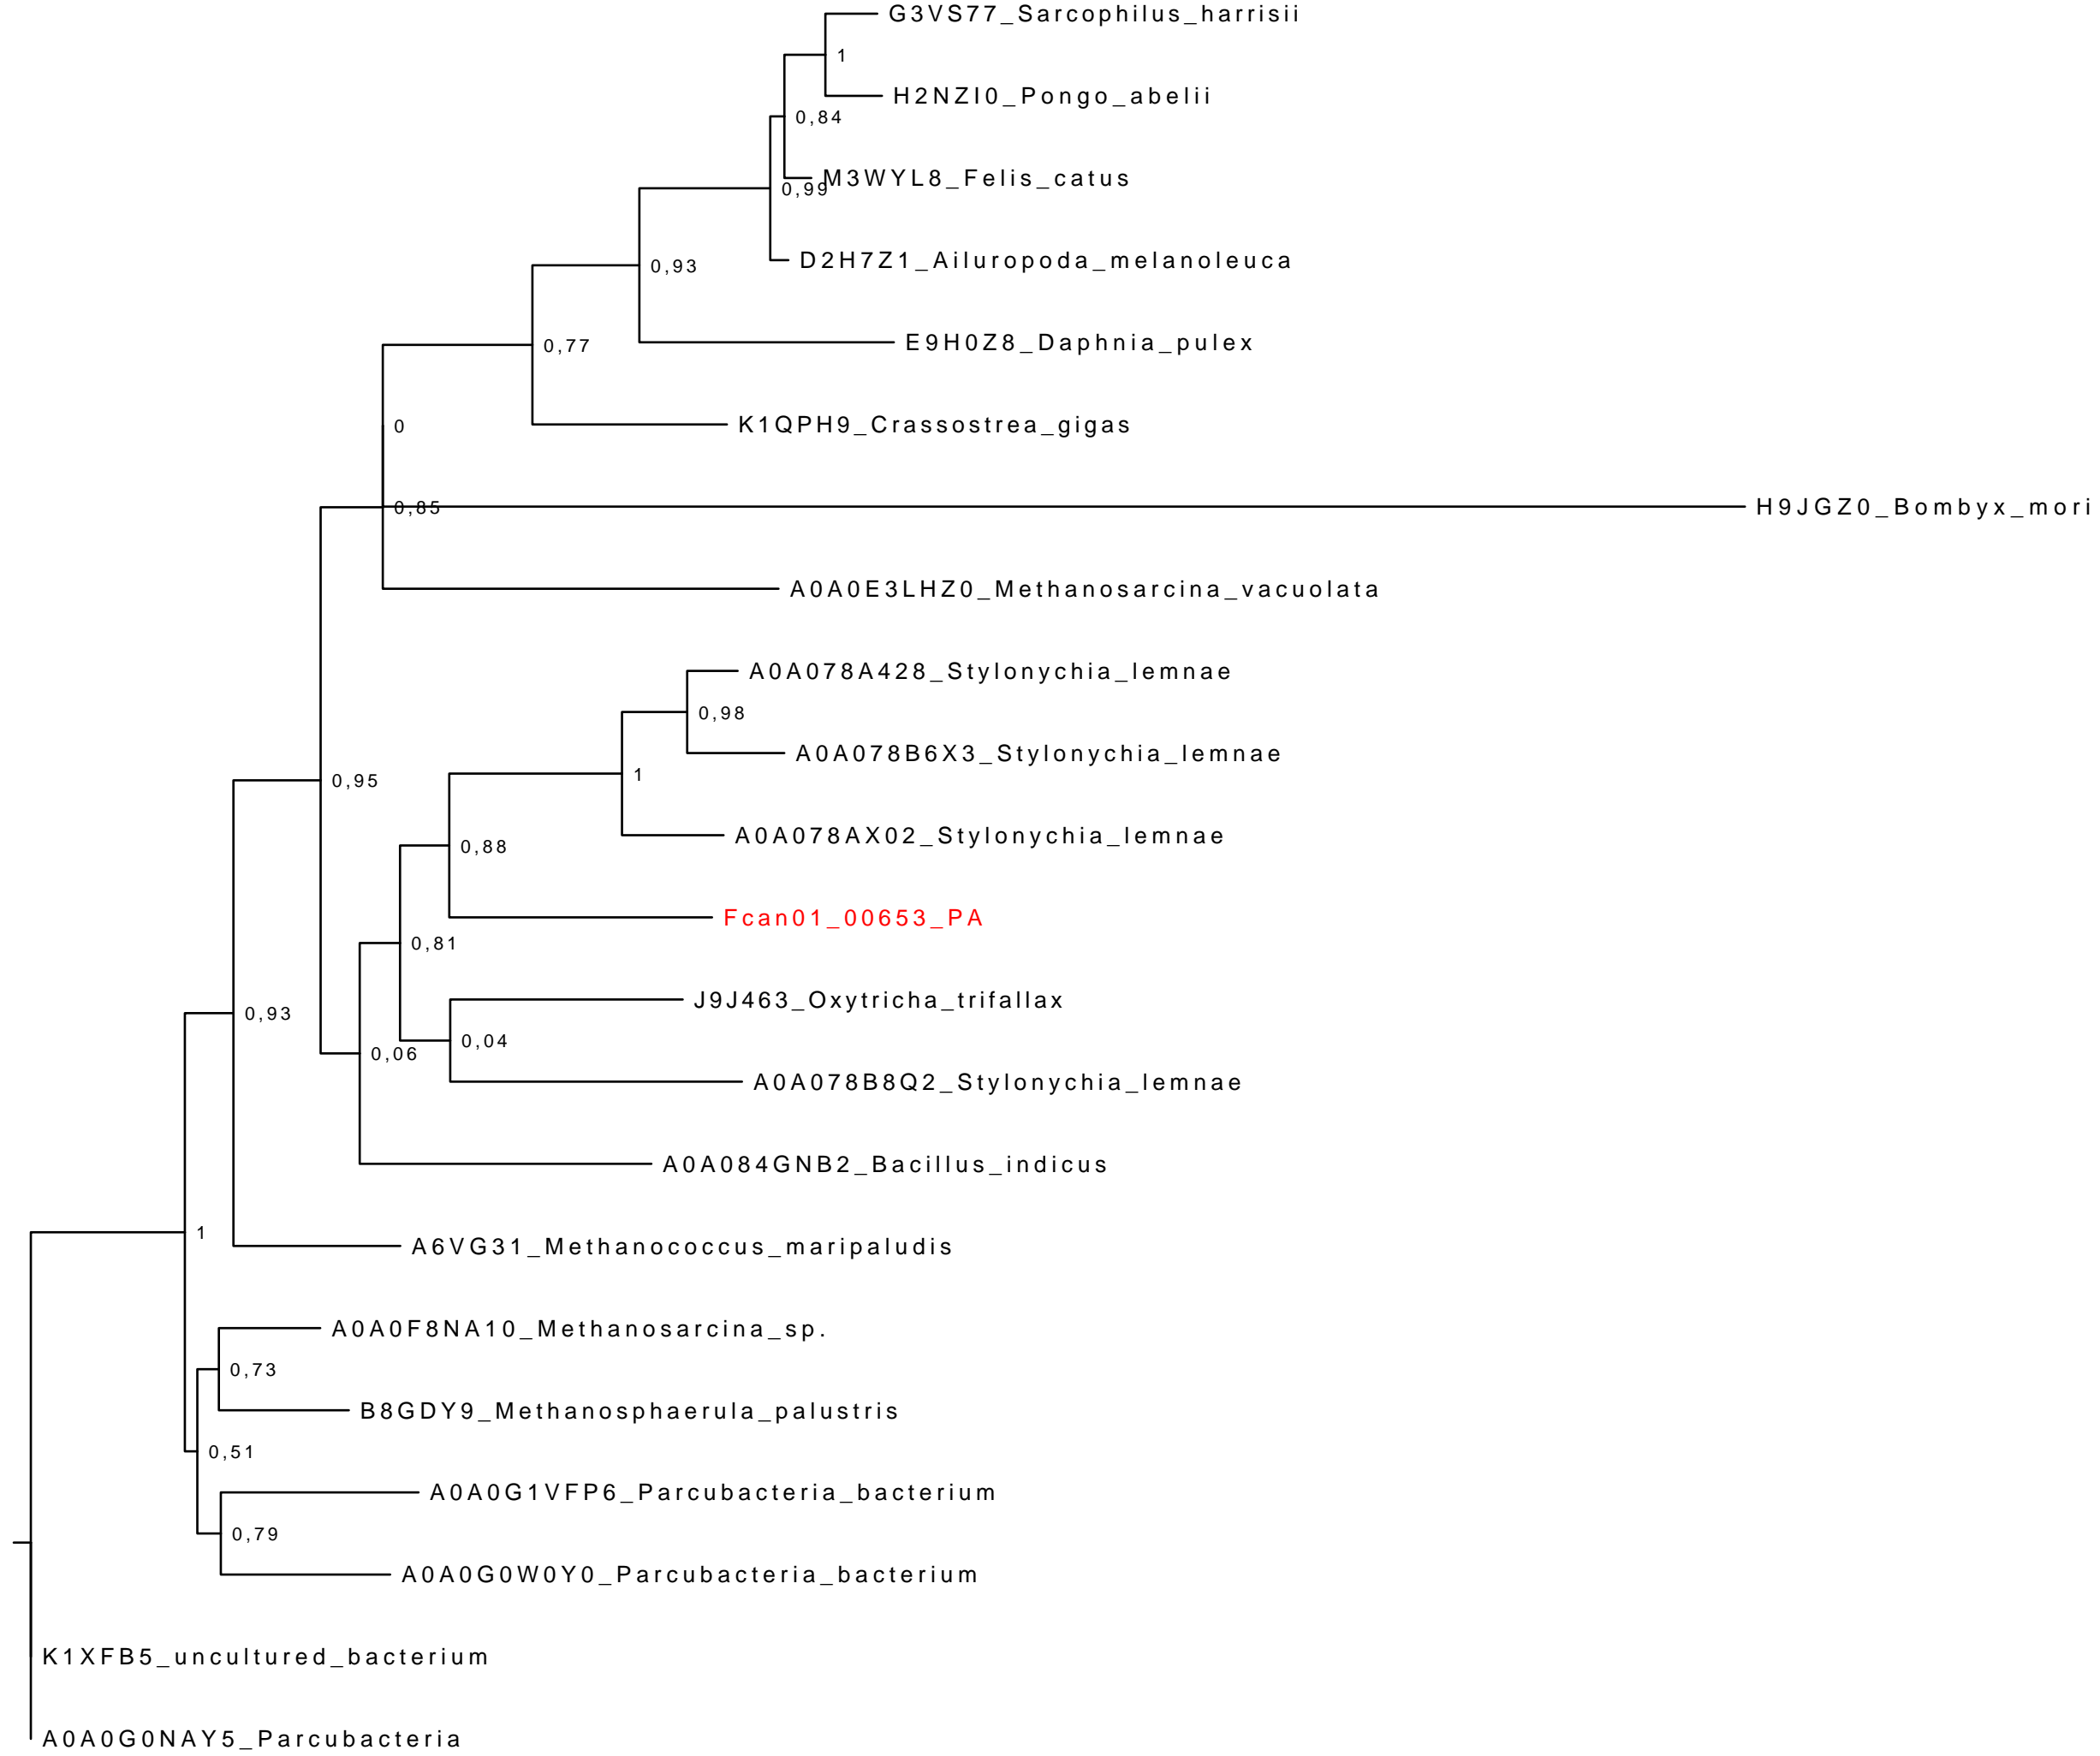

0.8

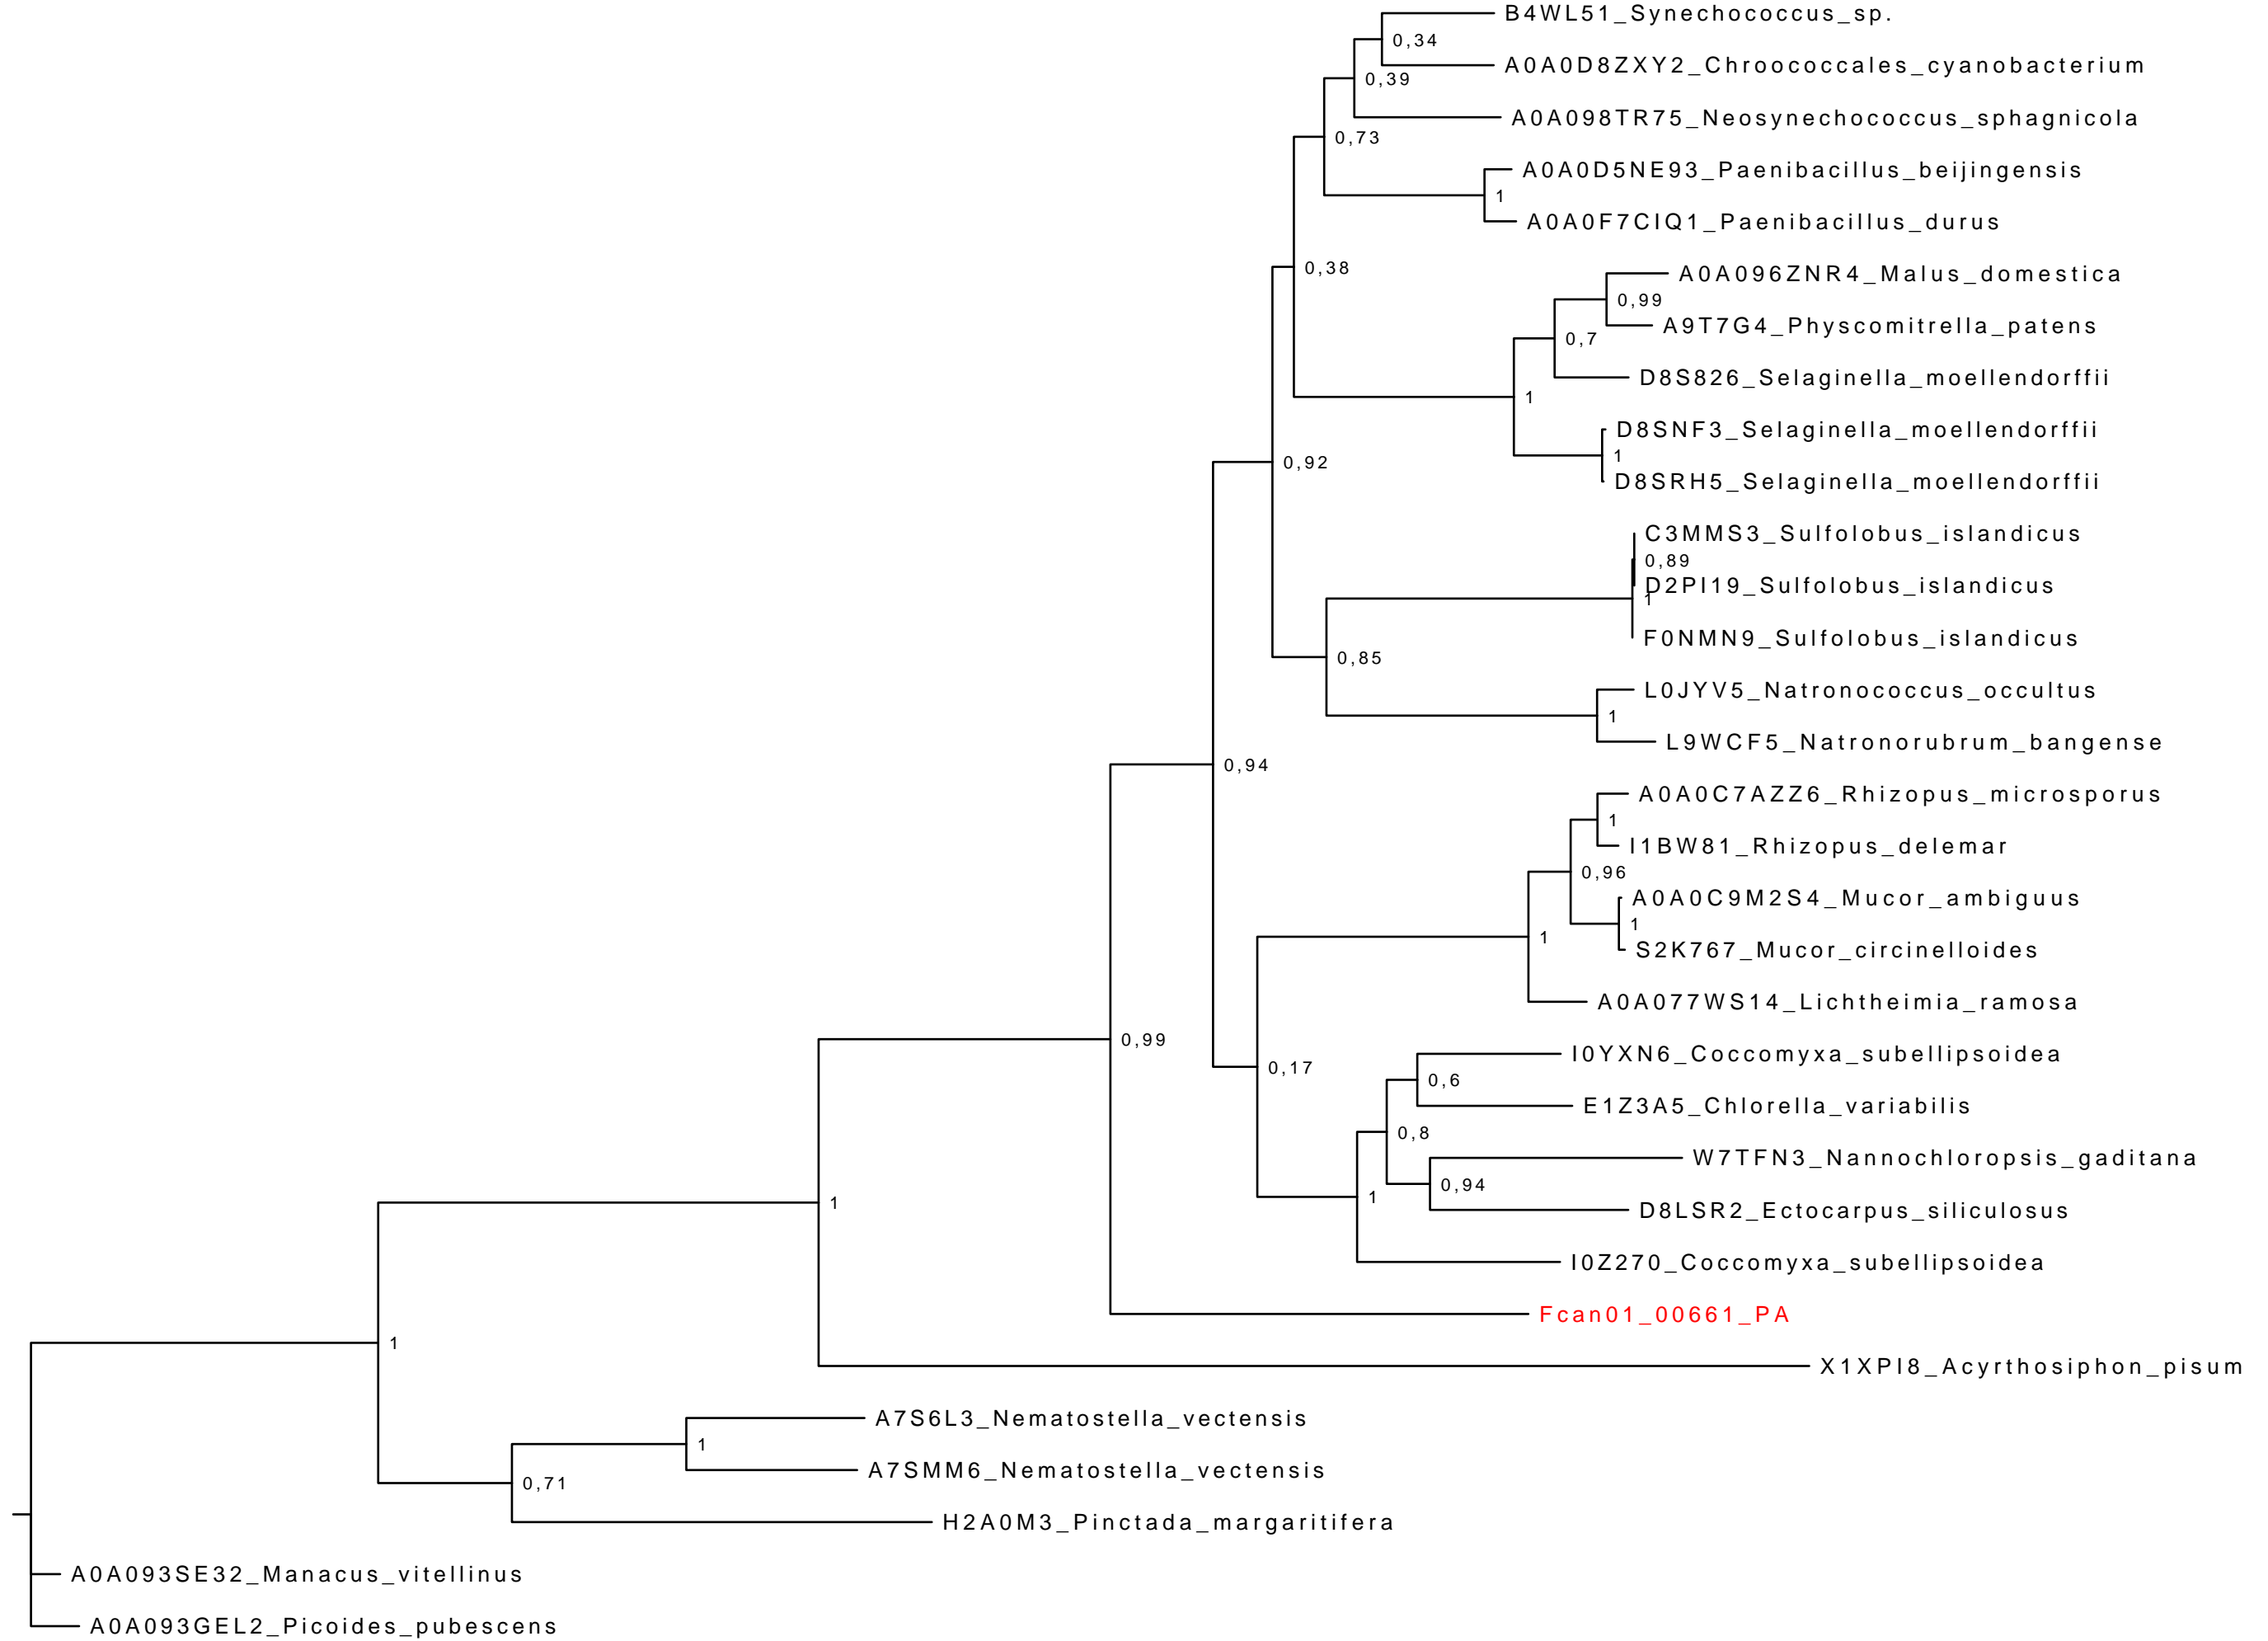

0.5

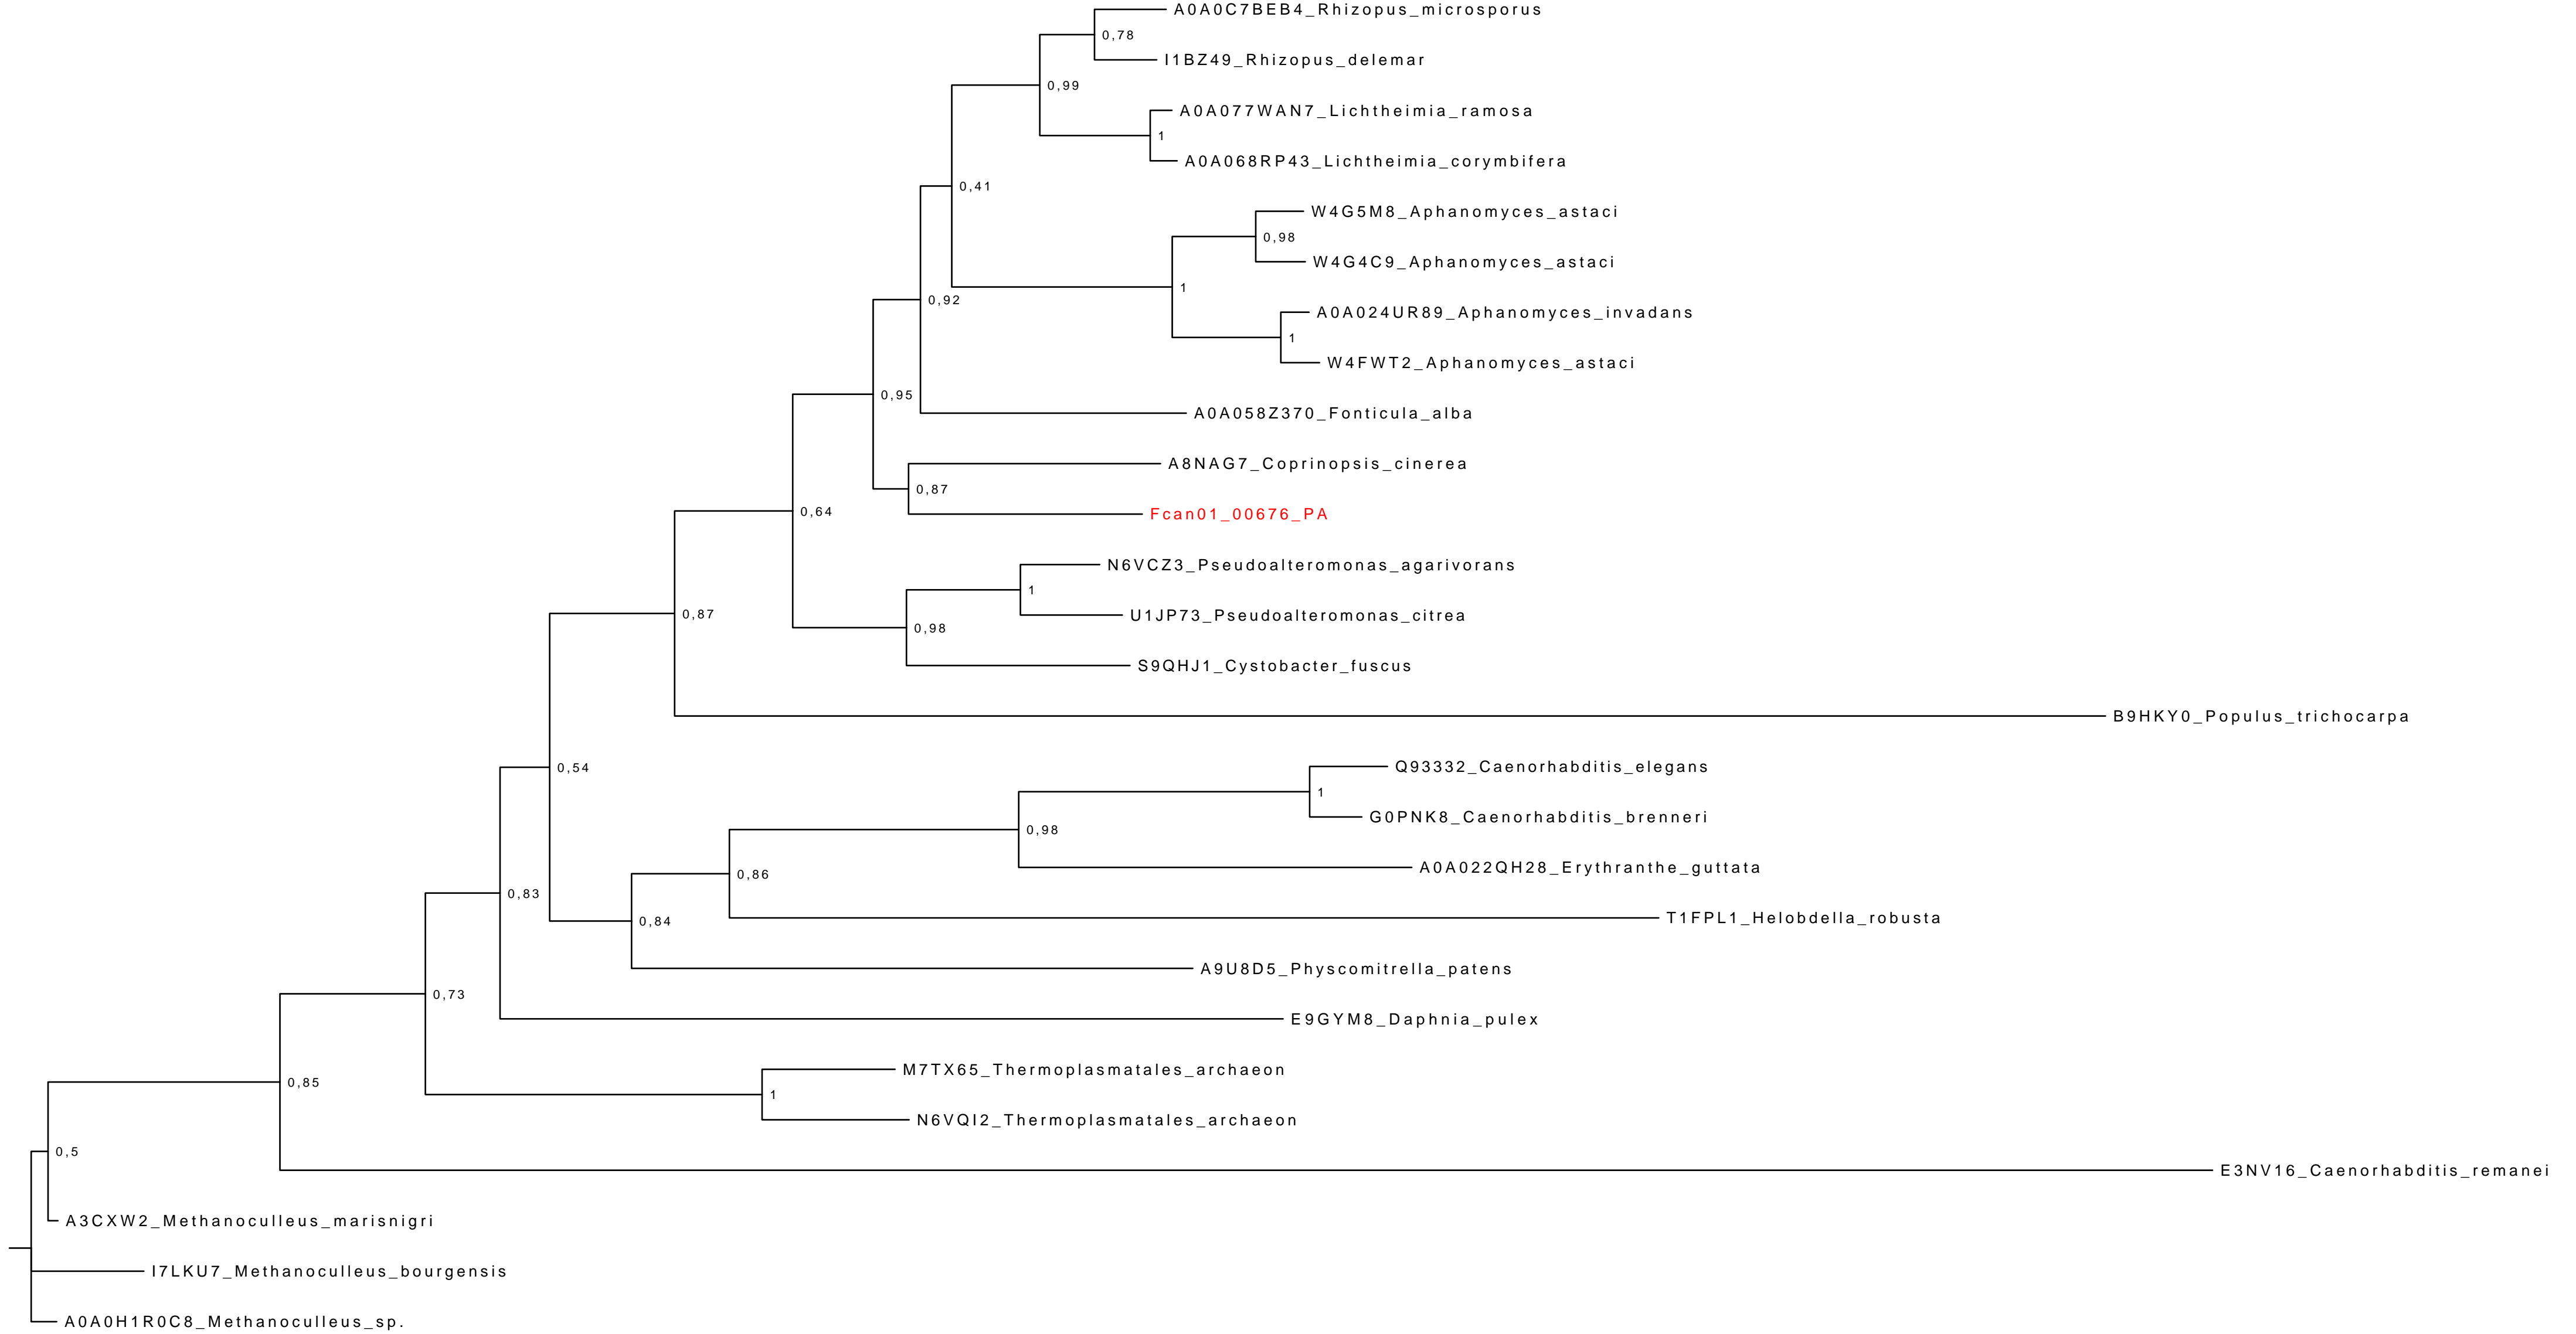

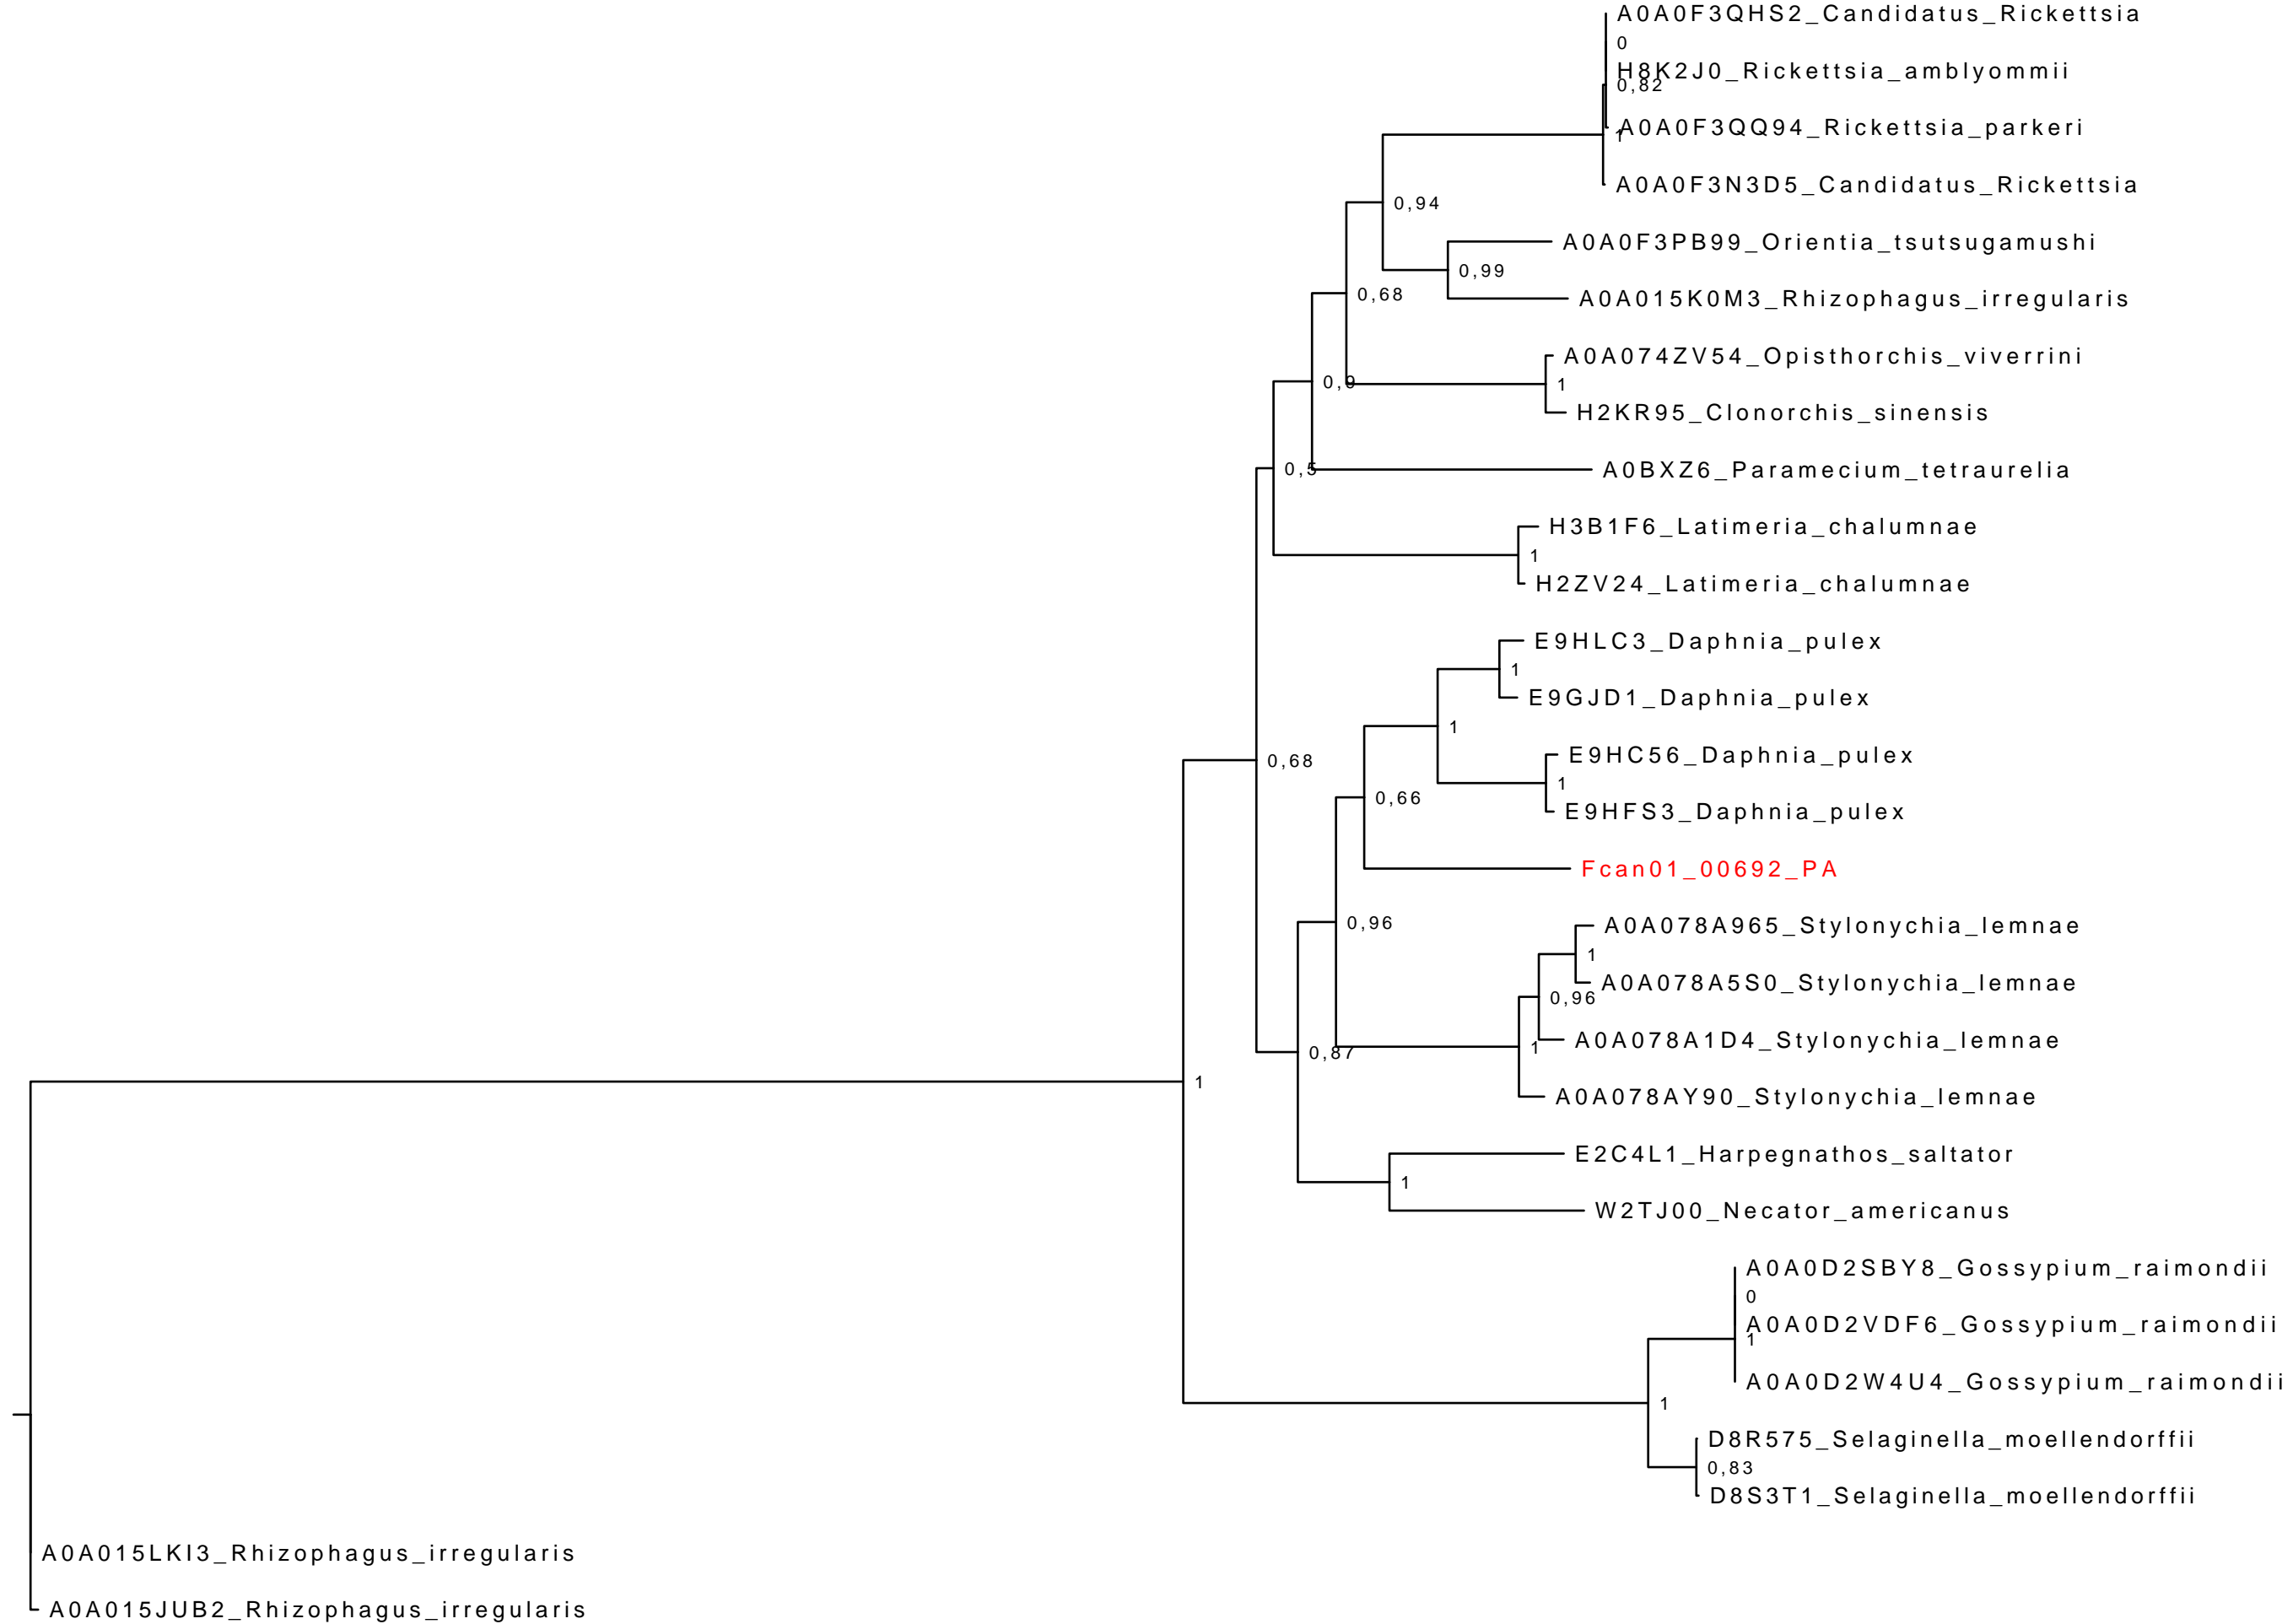

2.0



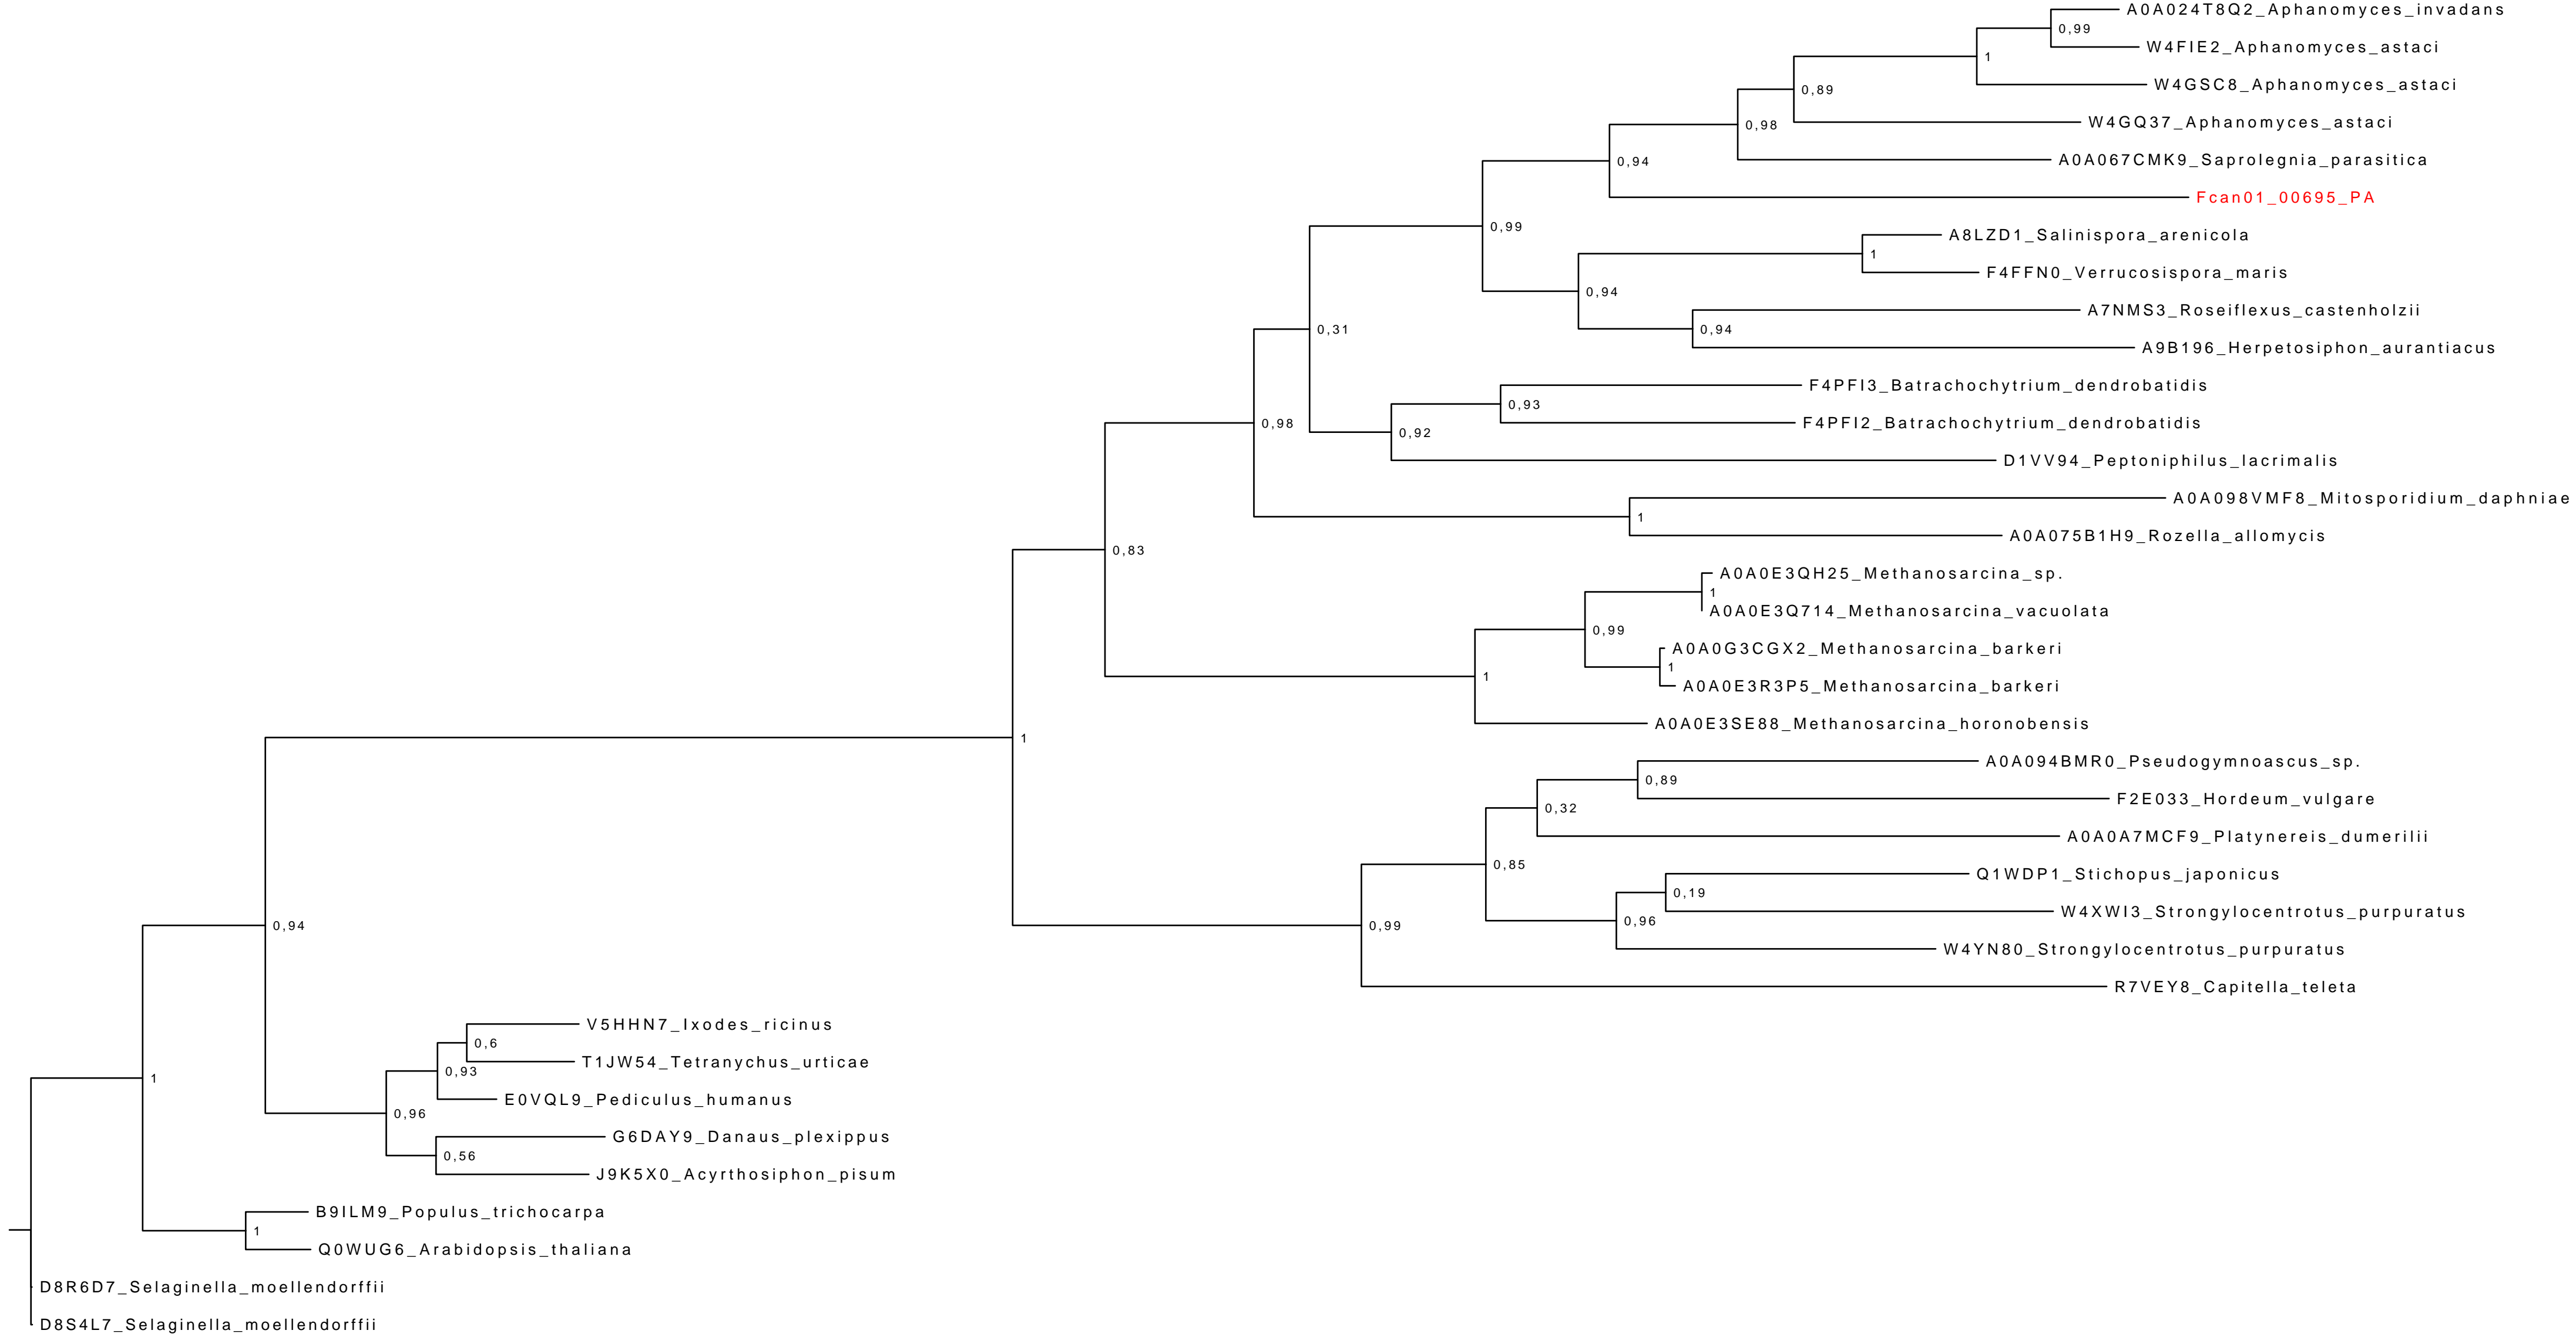

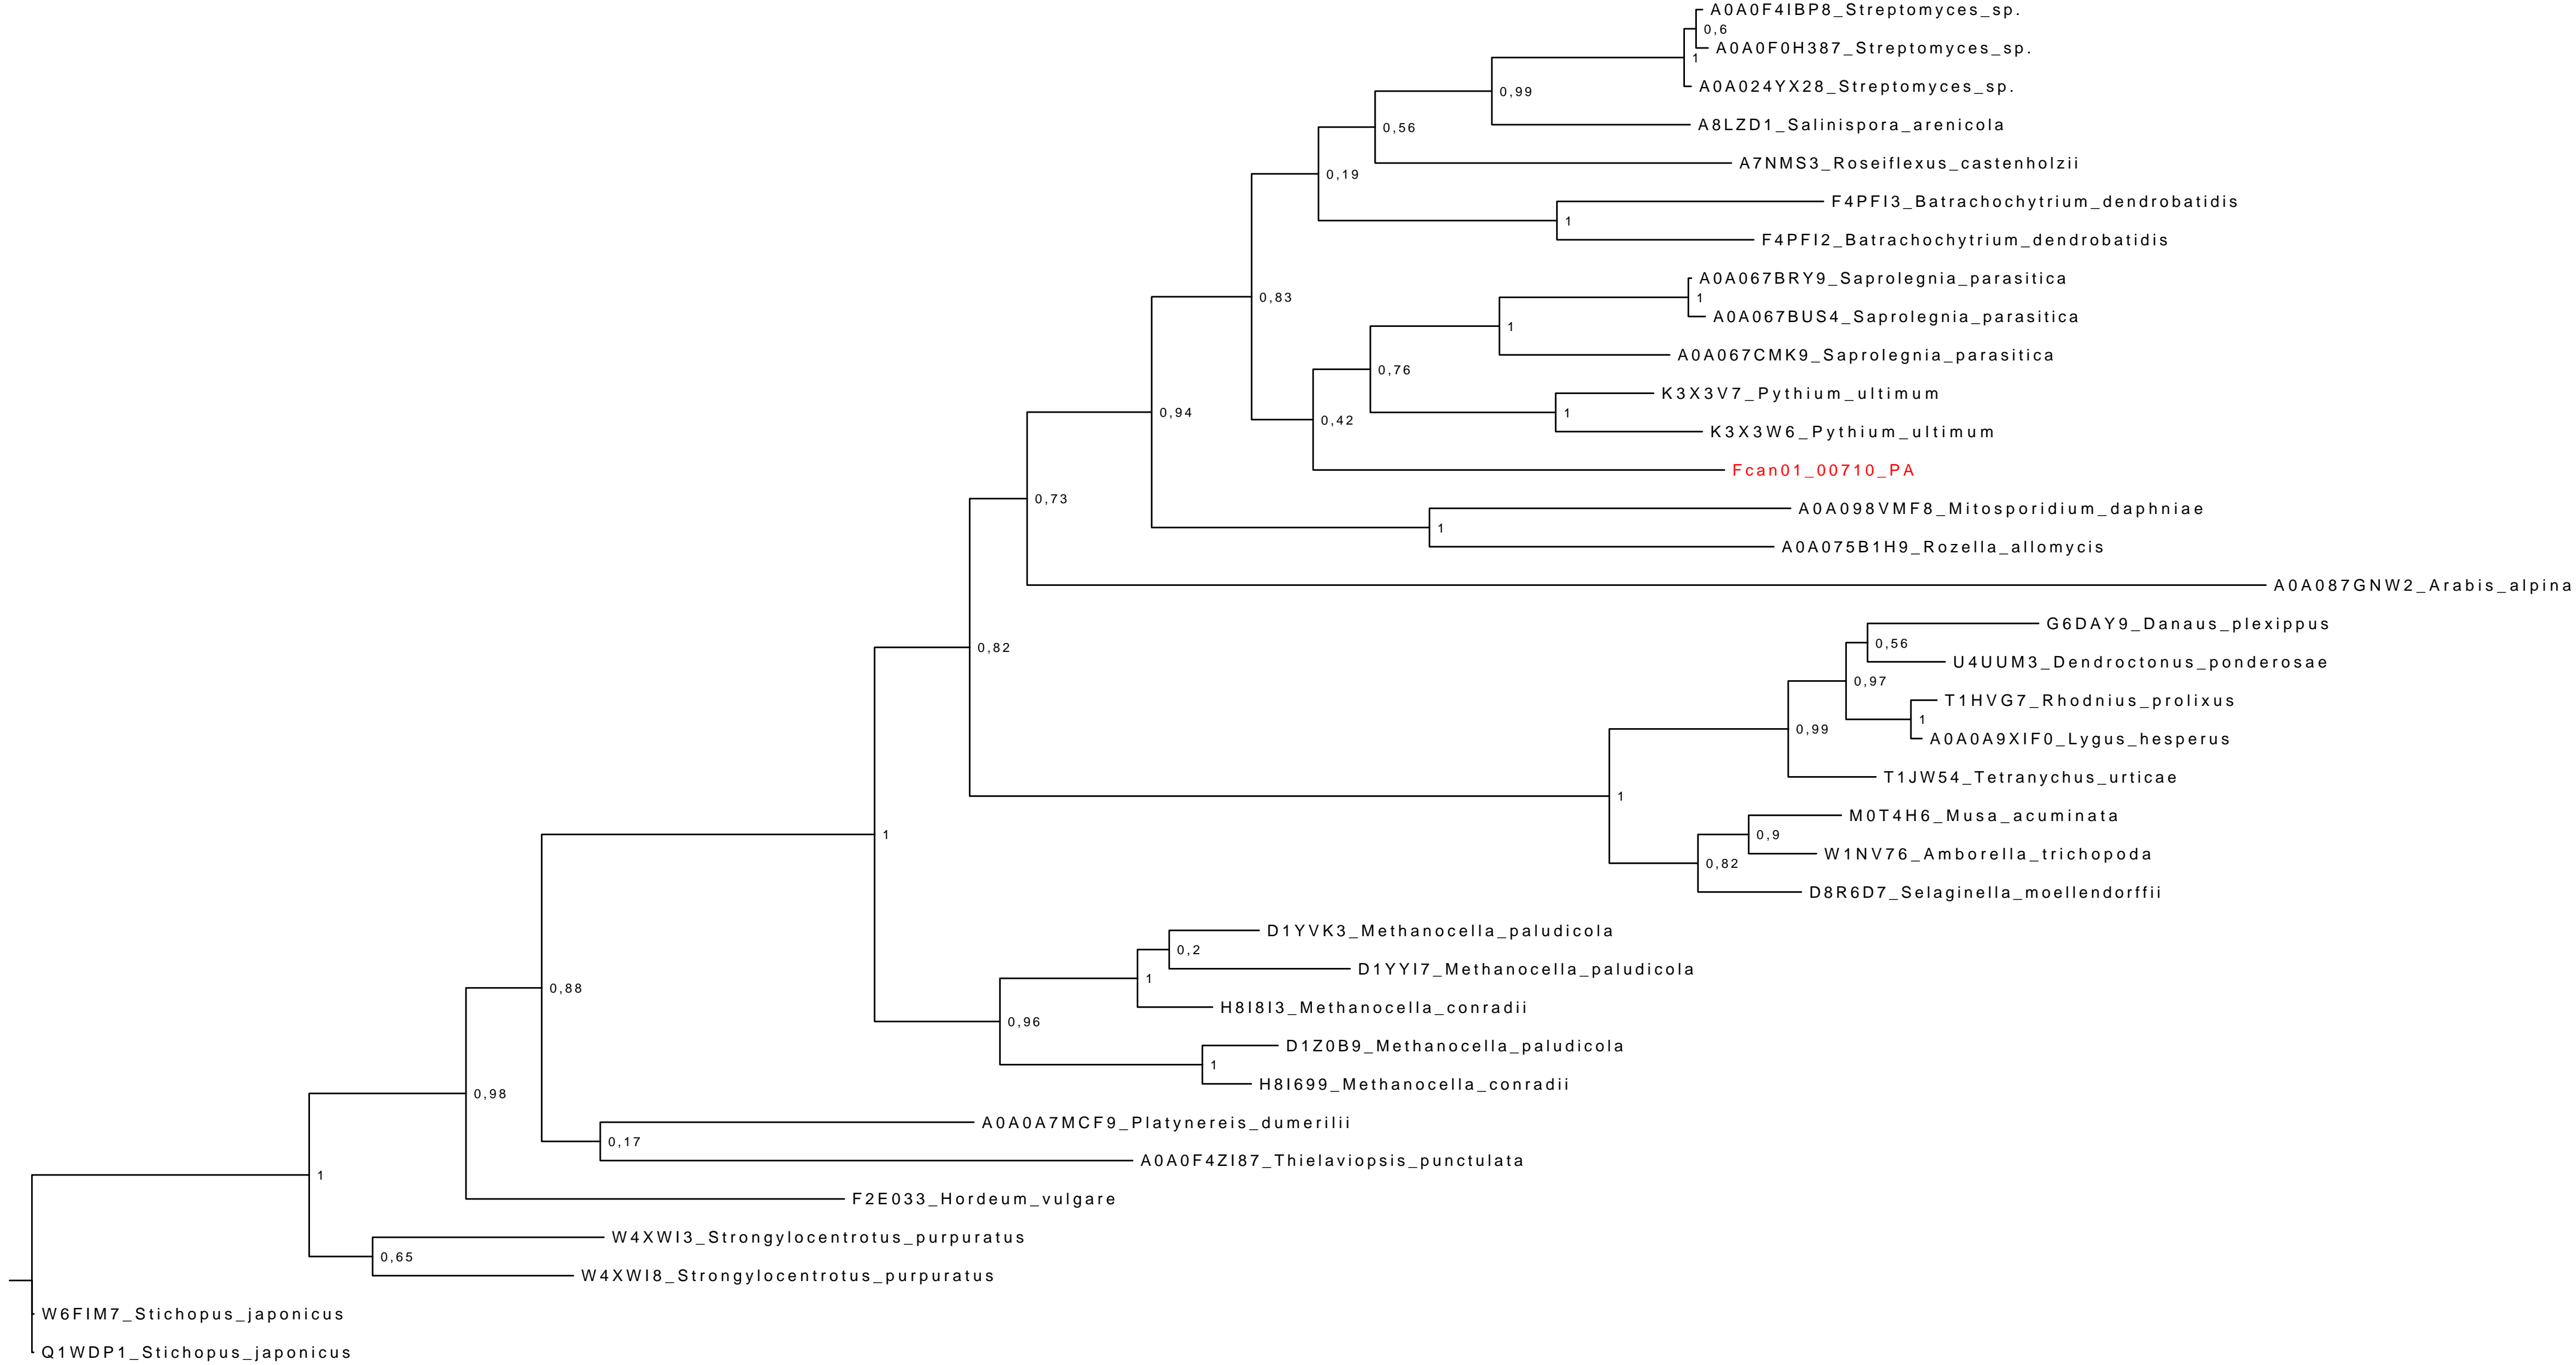

0.6

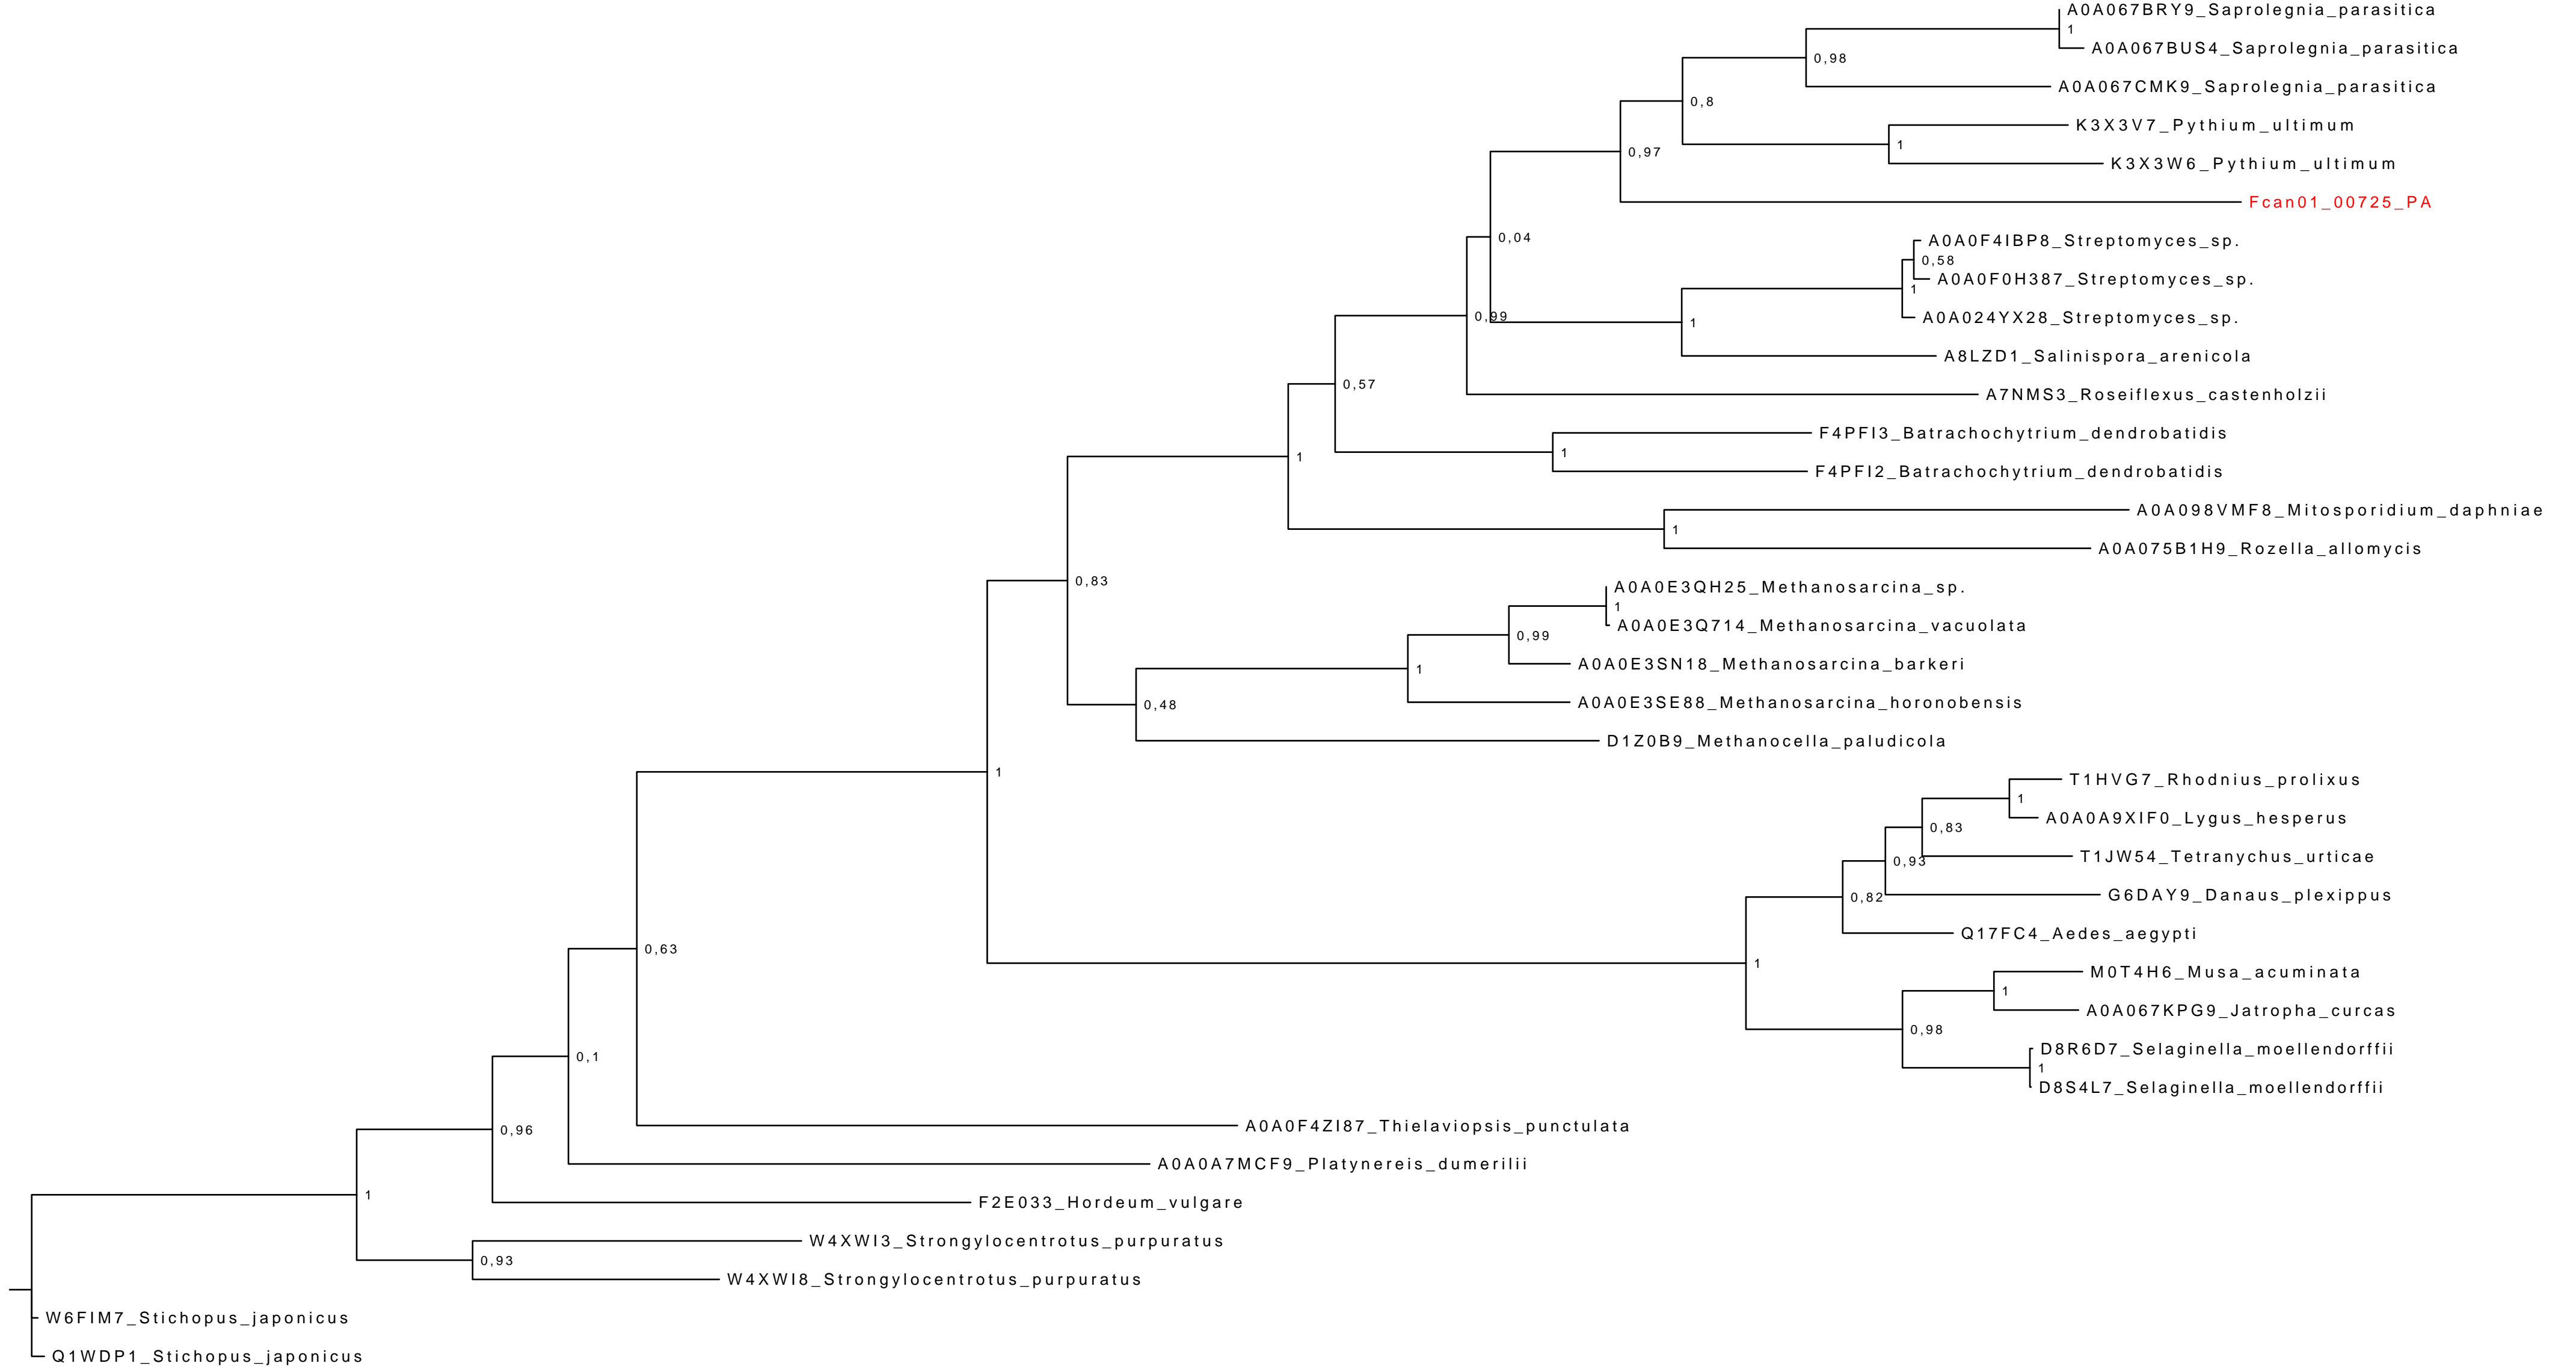

0.5

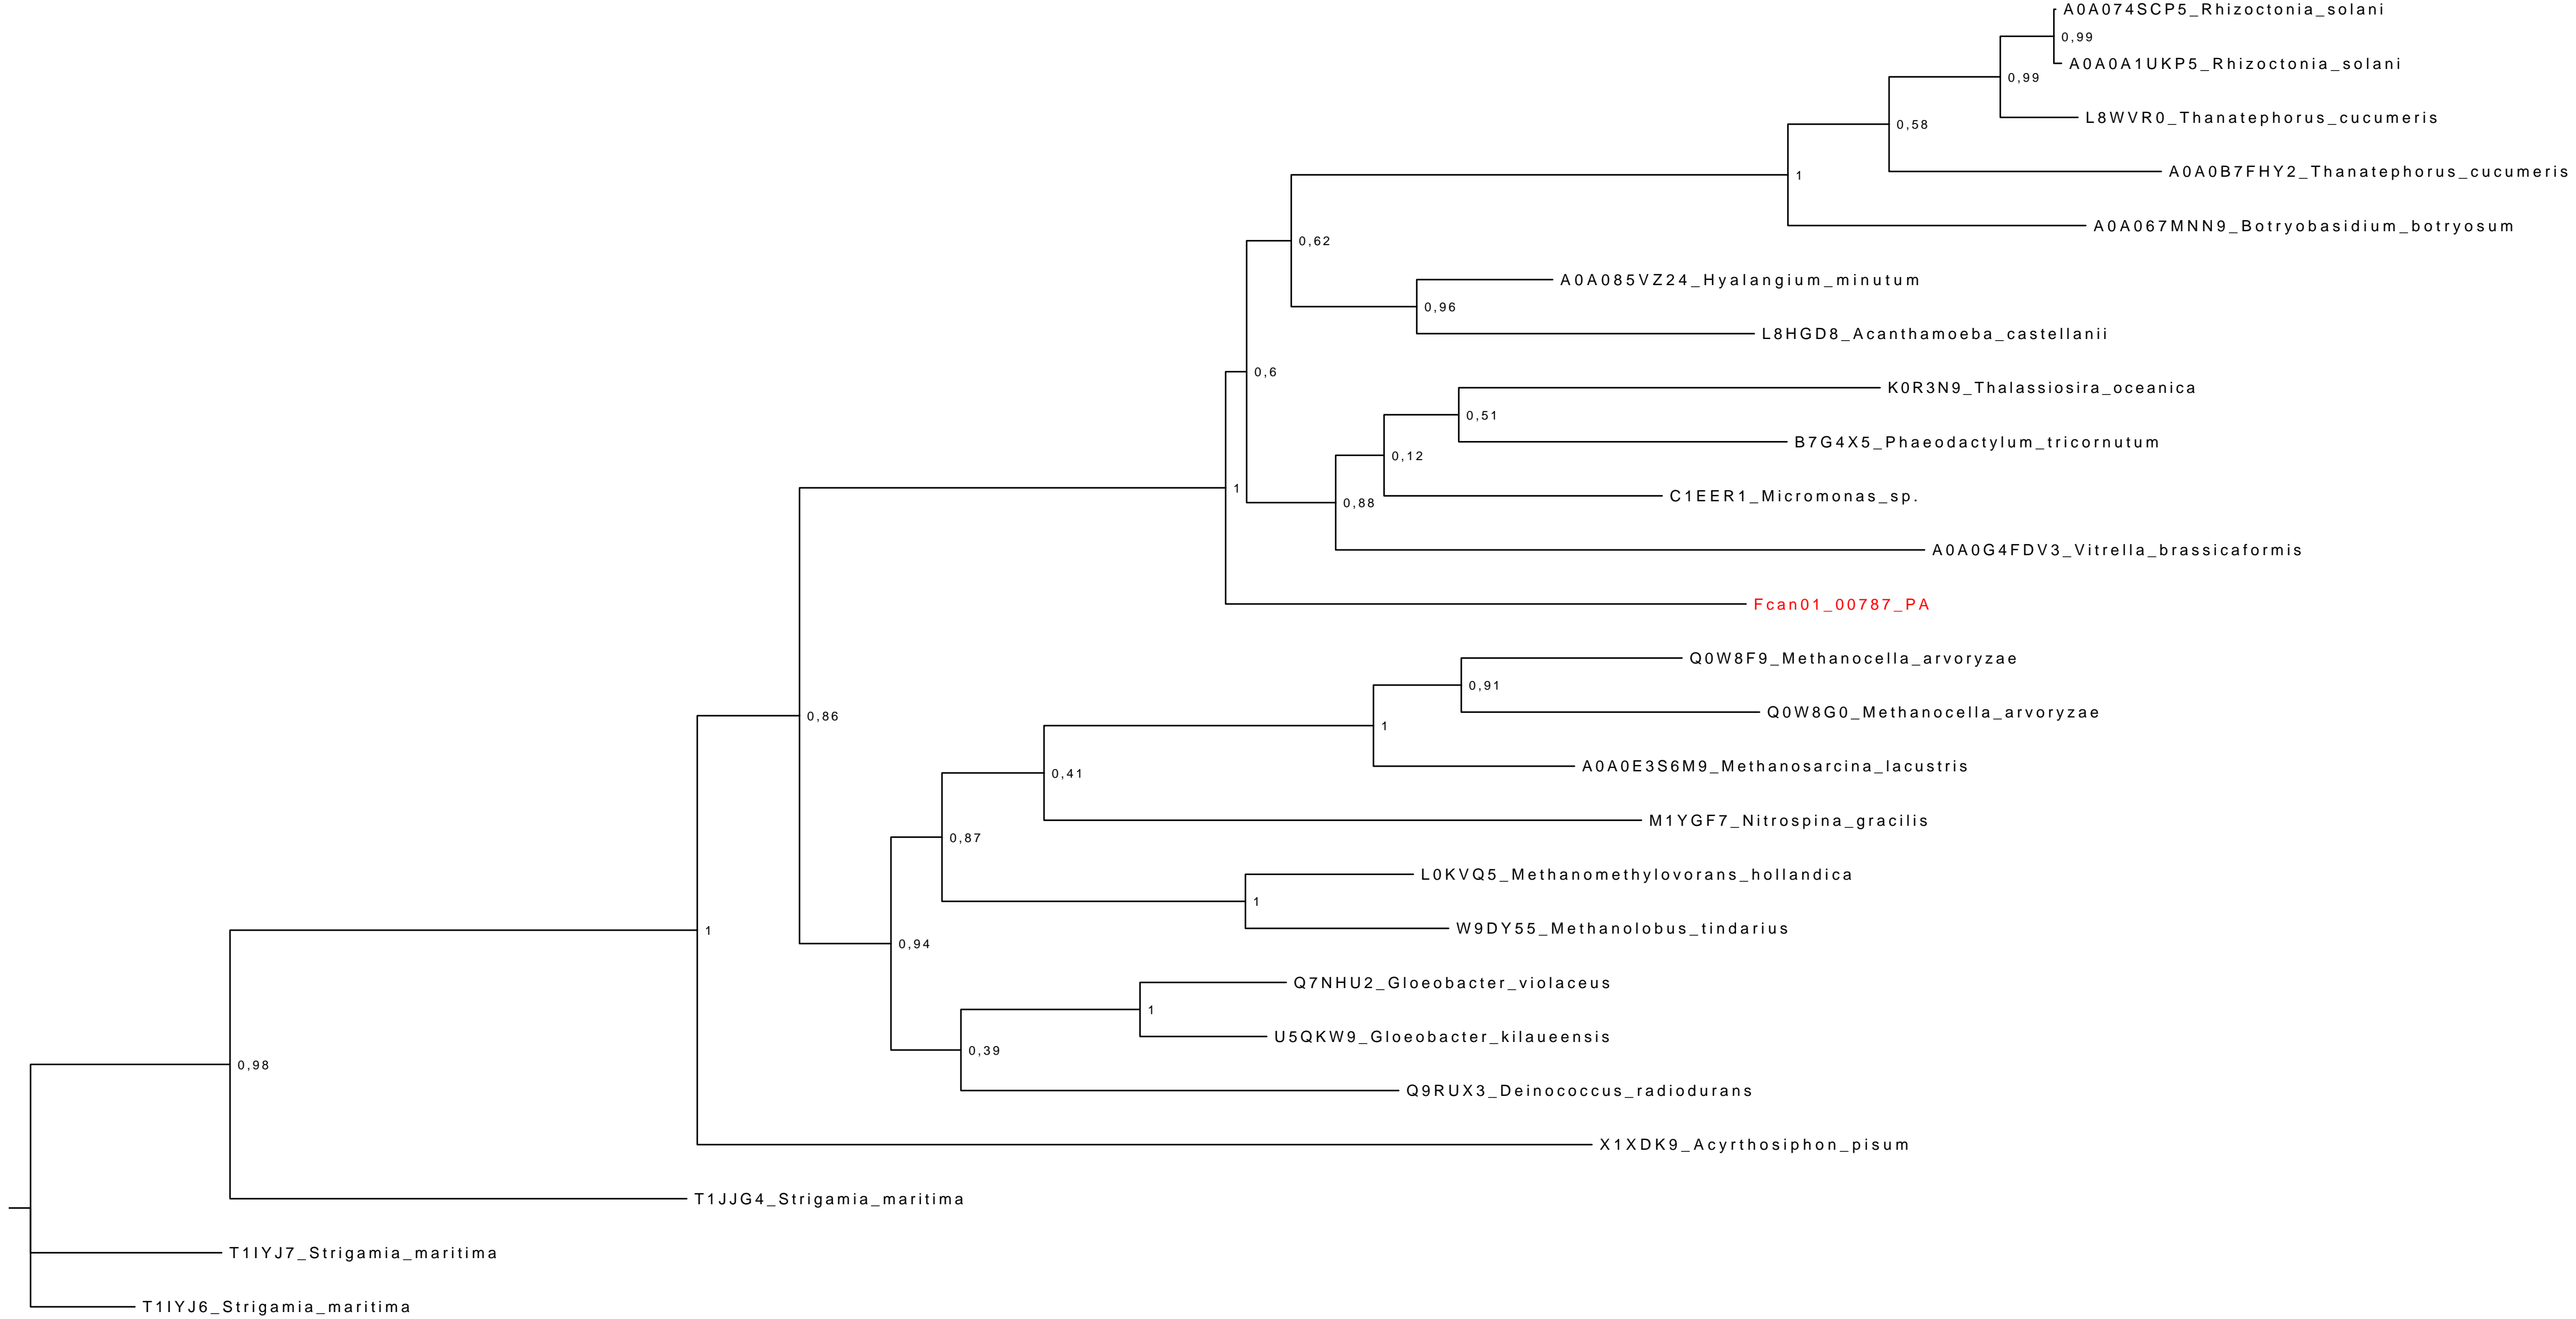

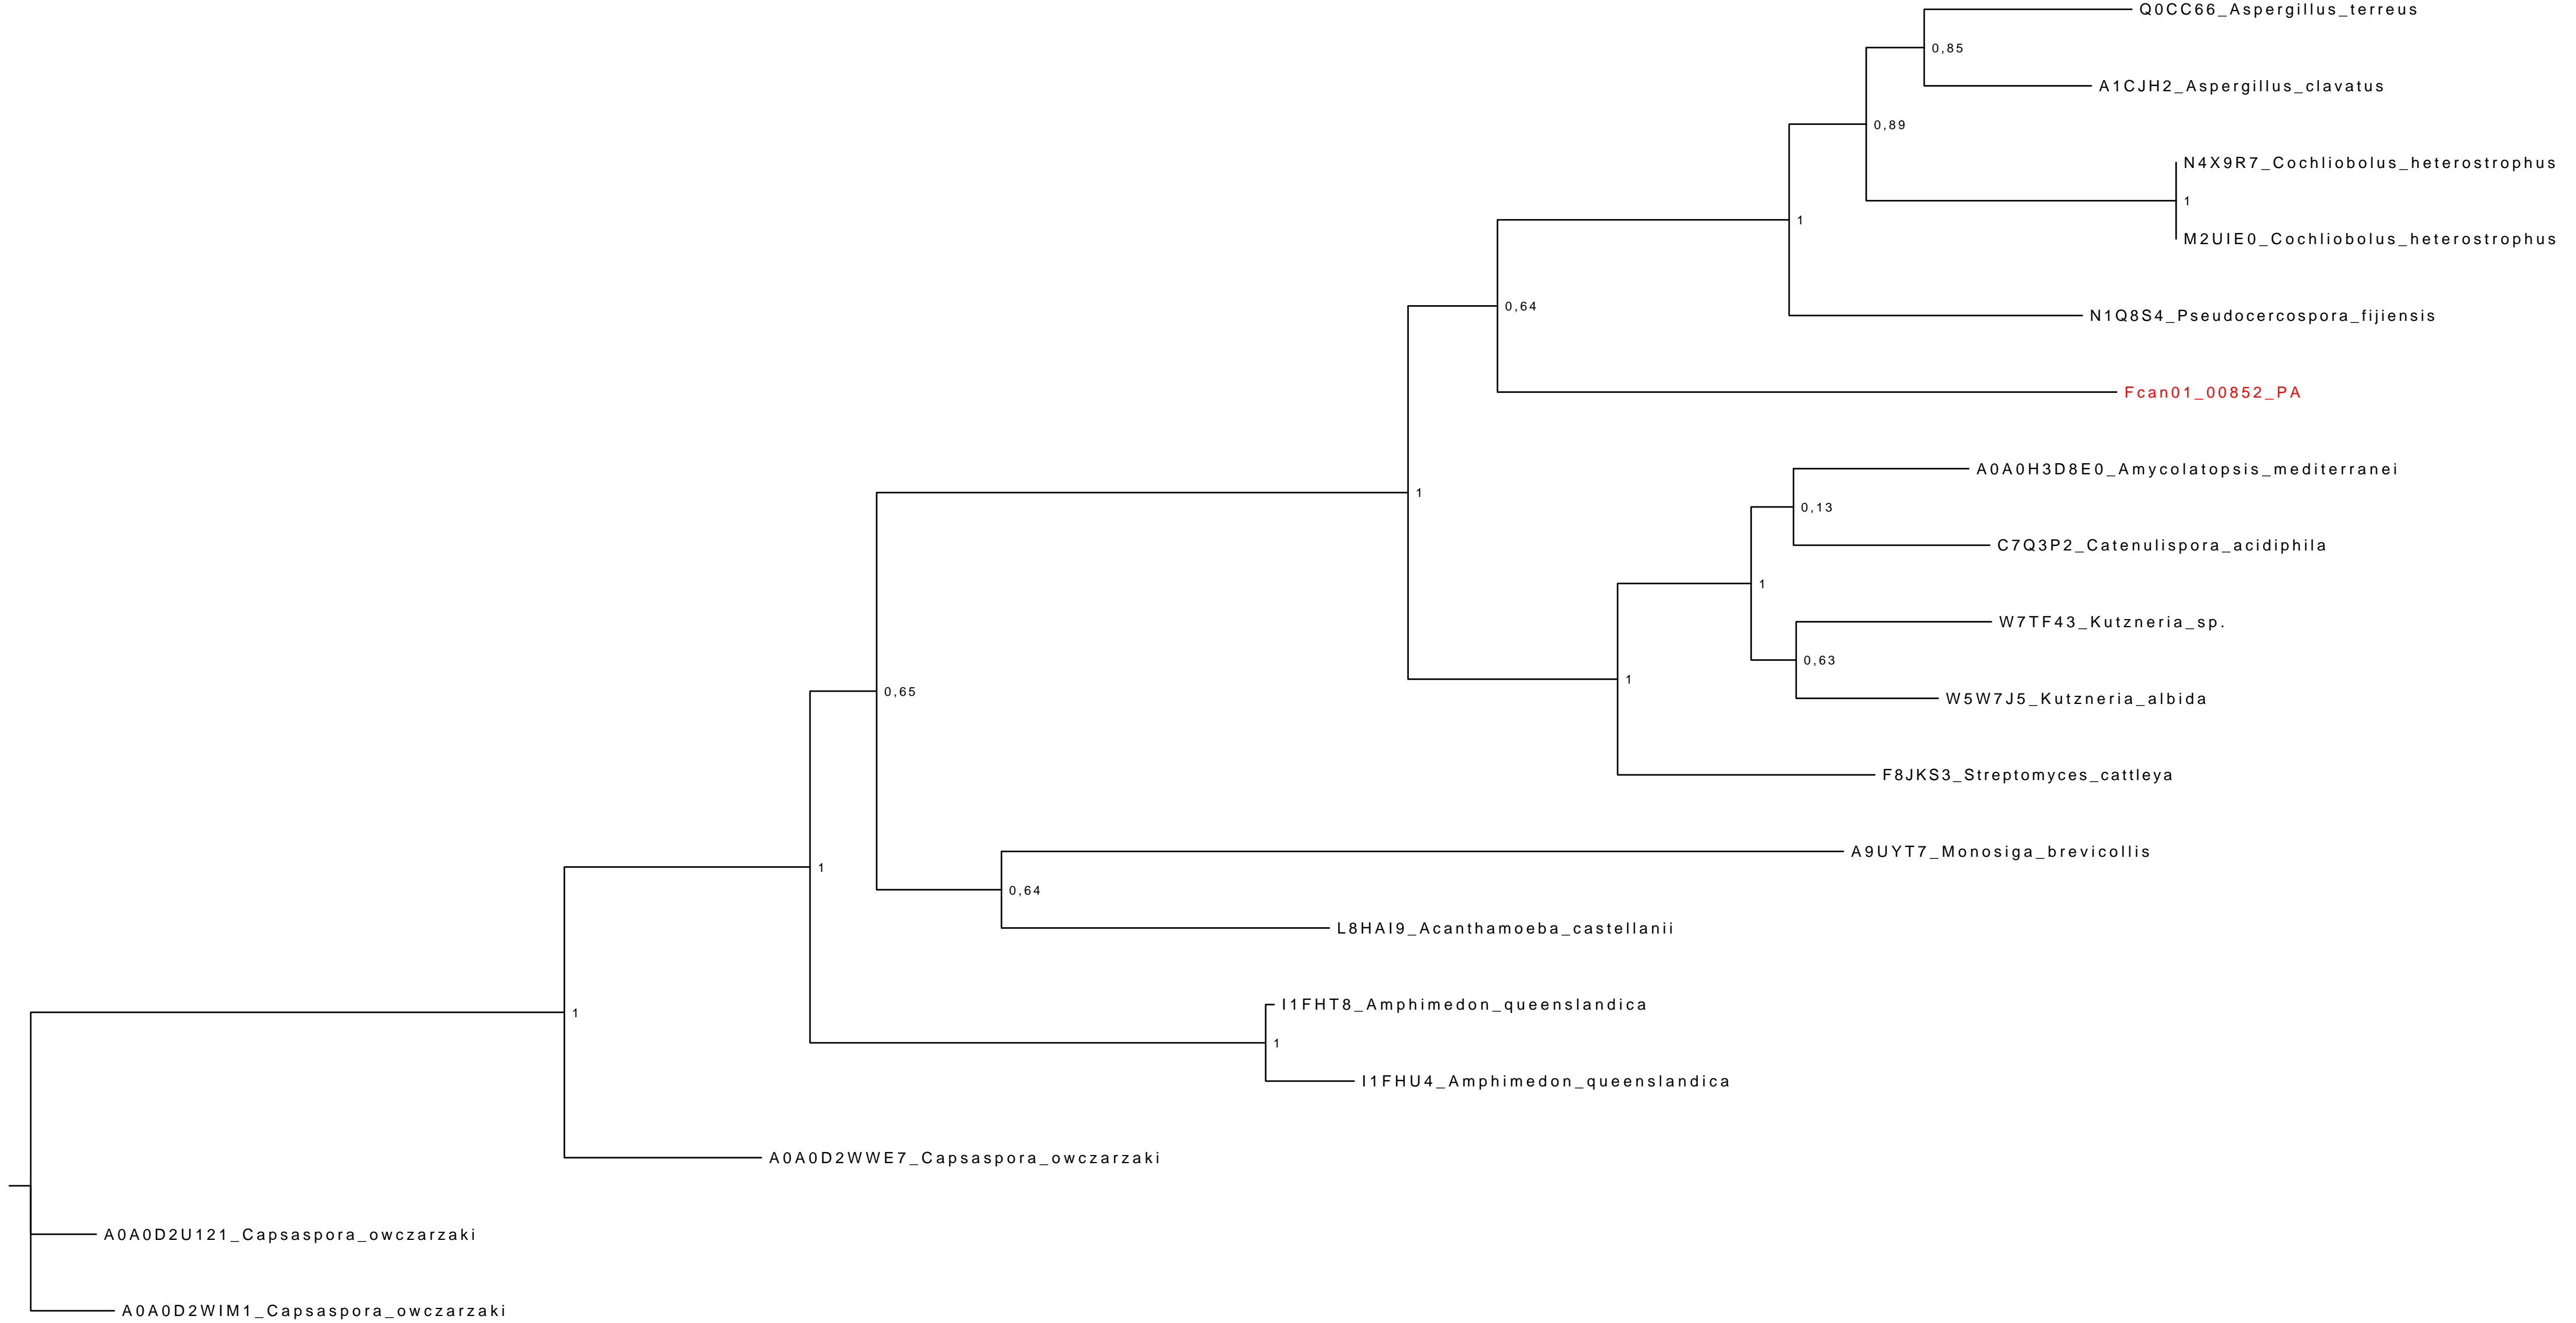

0.3

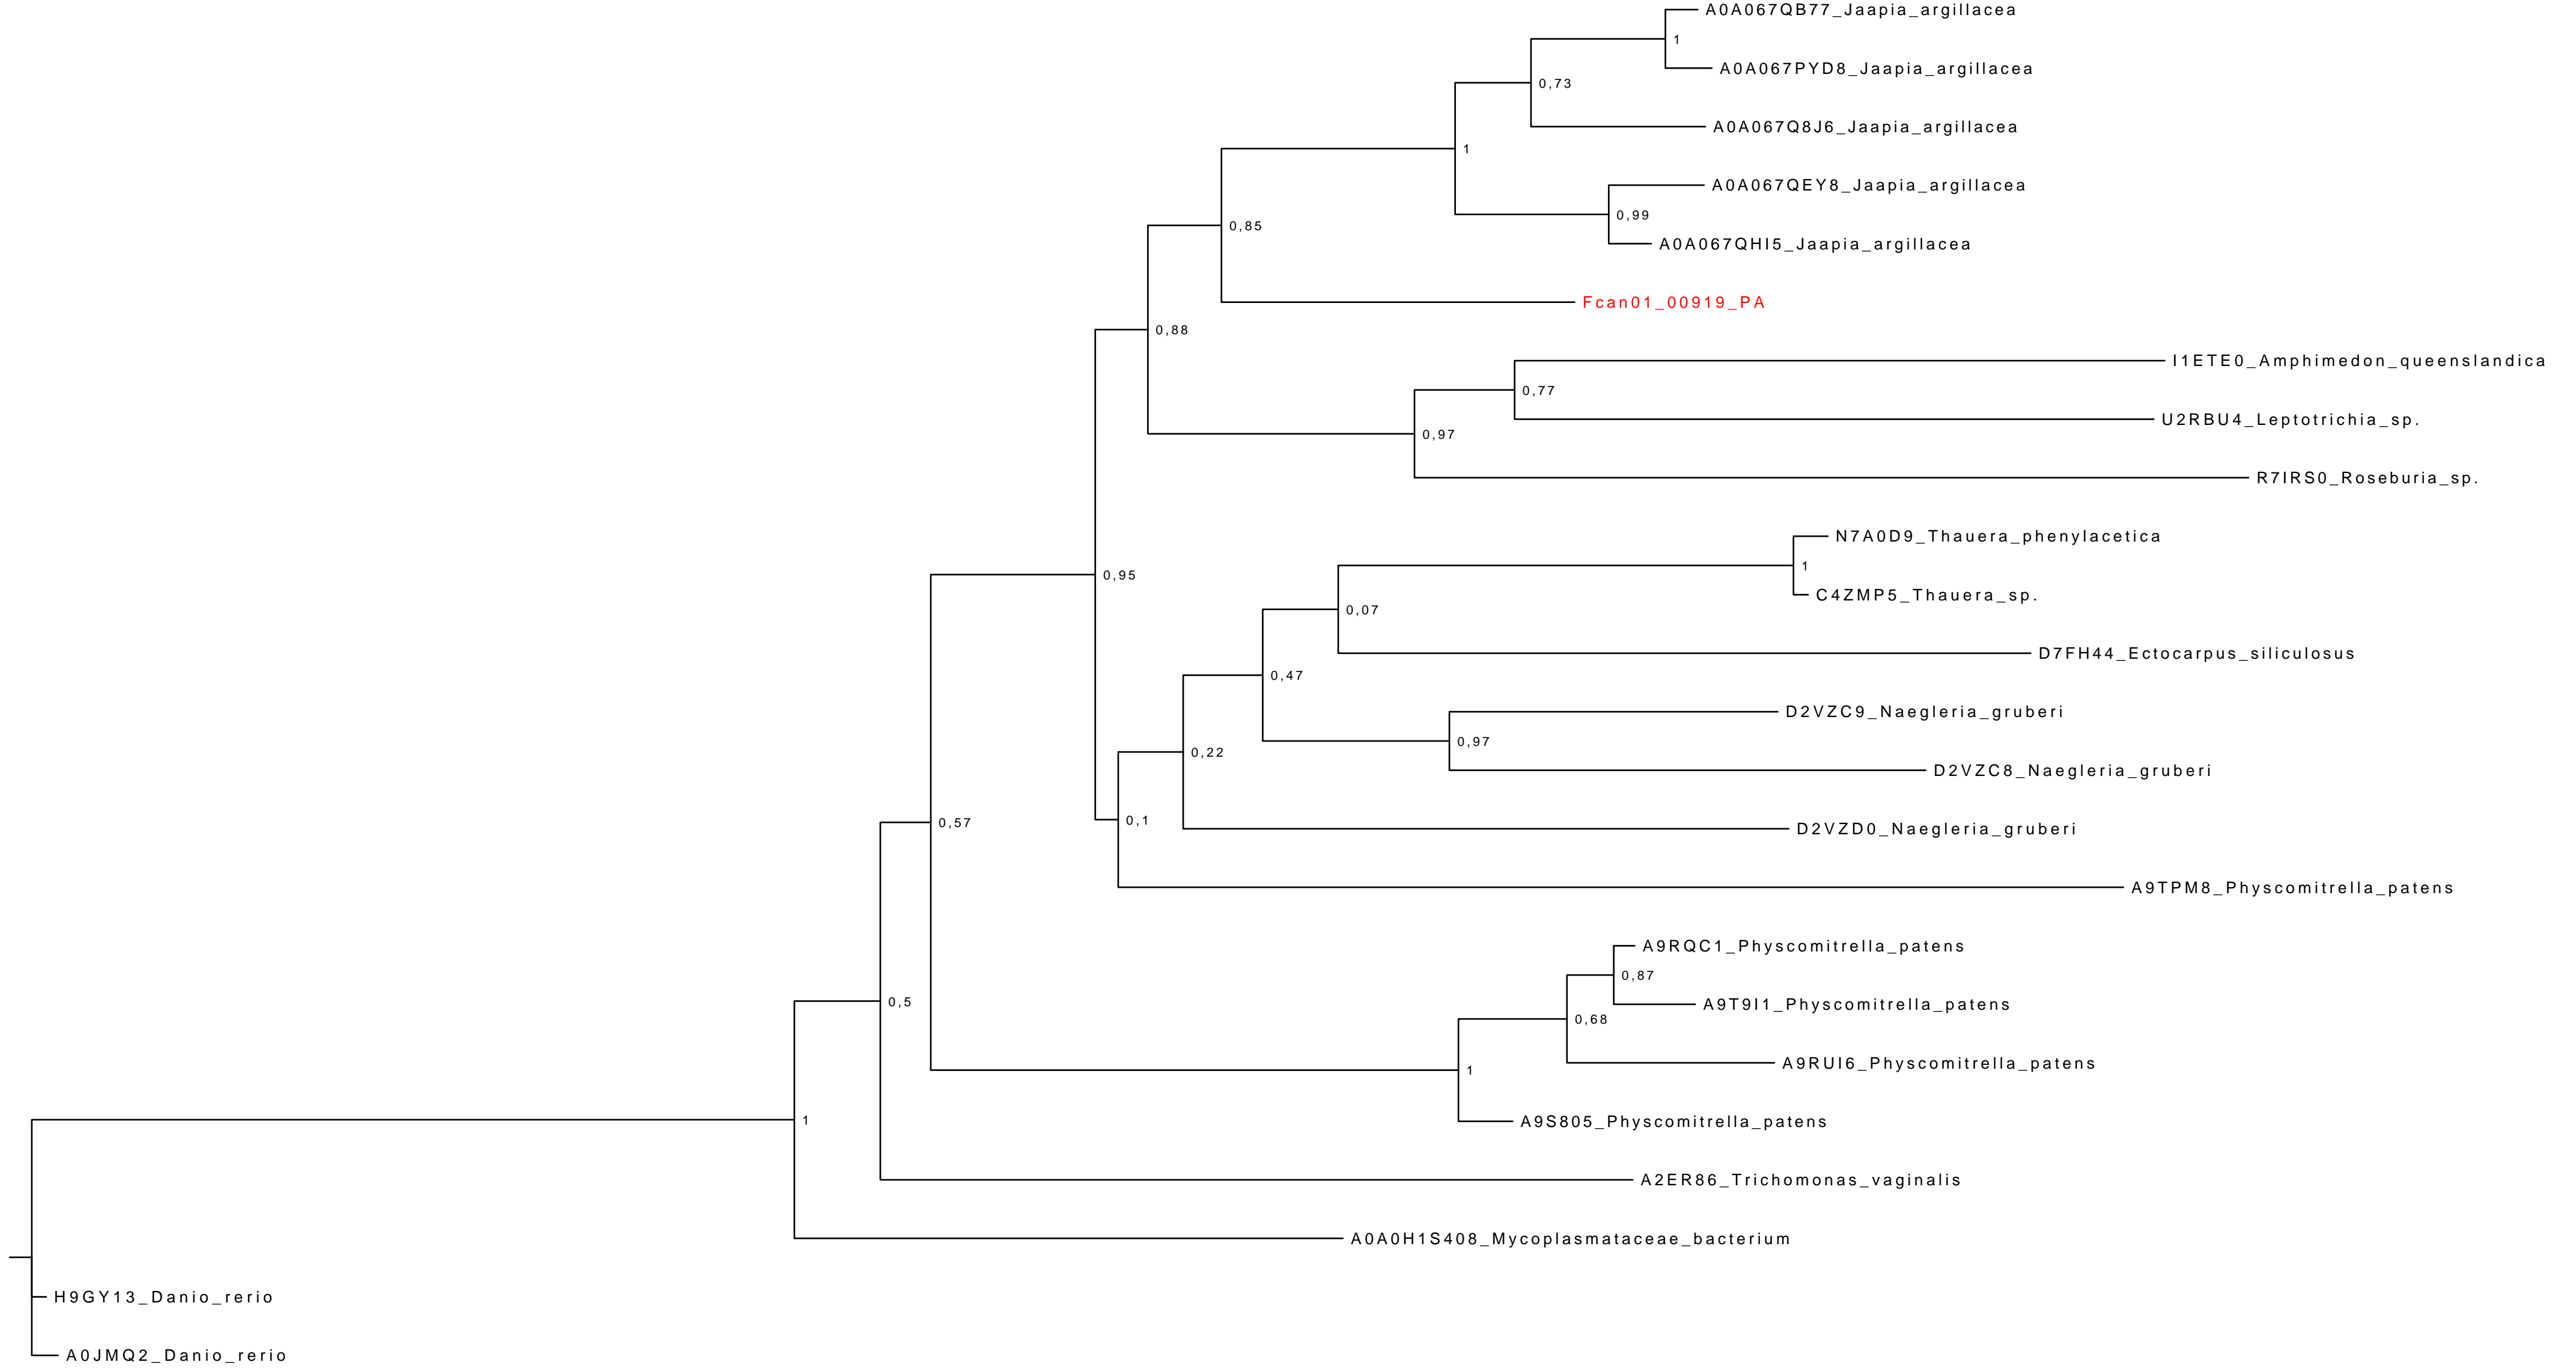

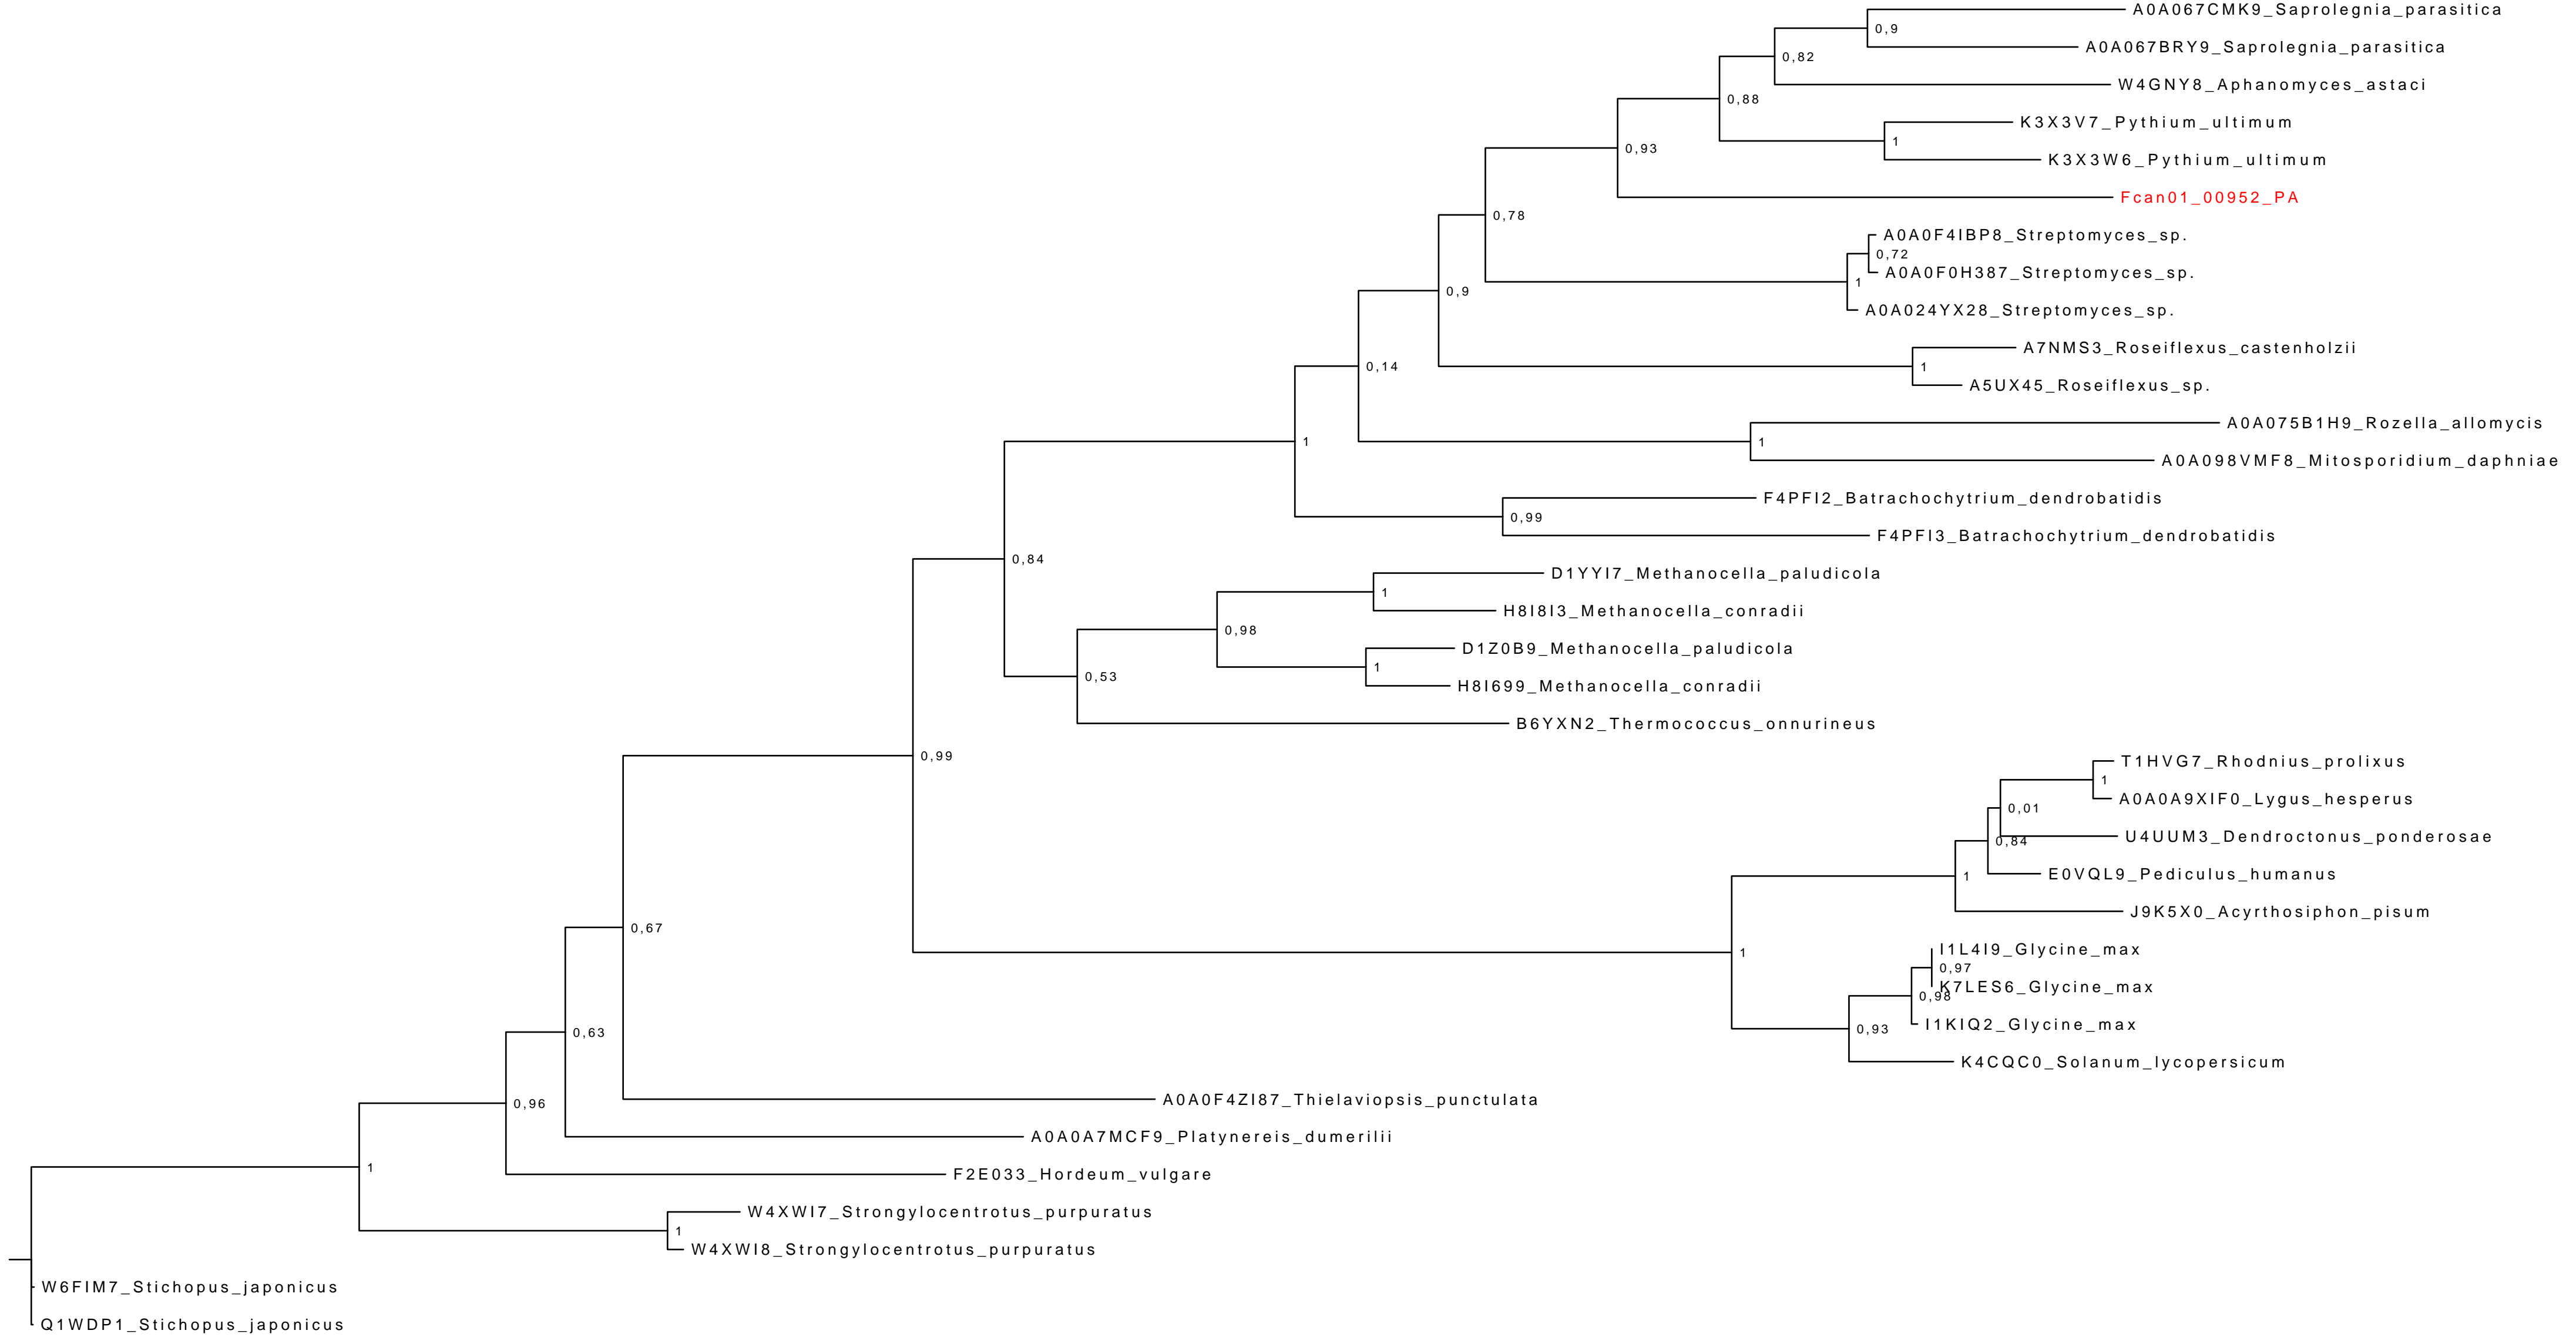

0.4

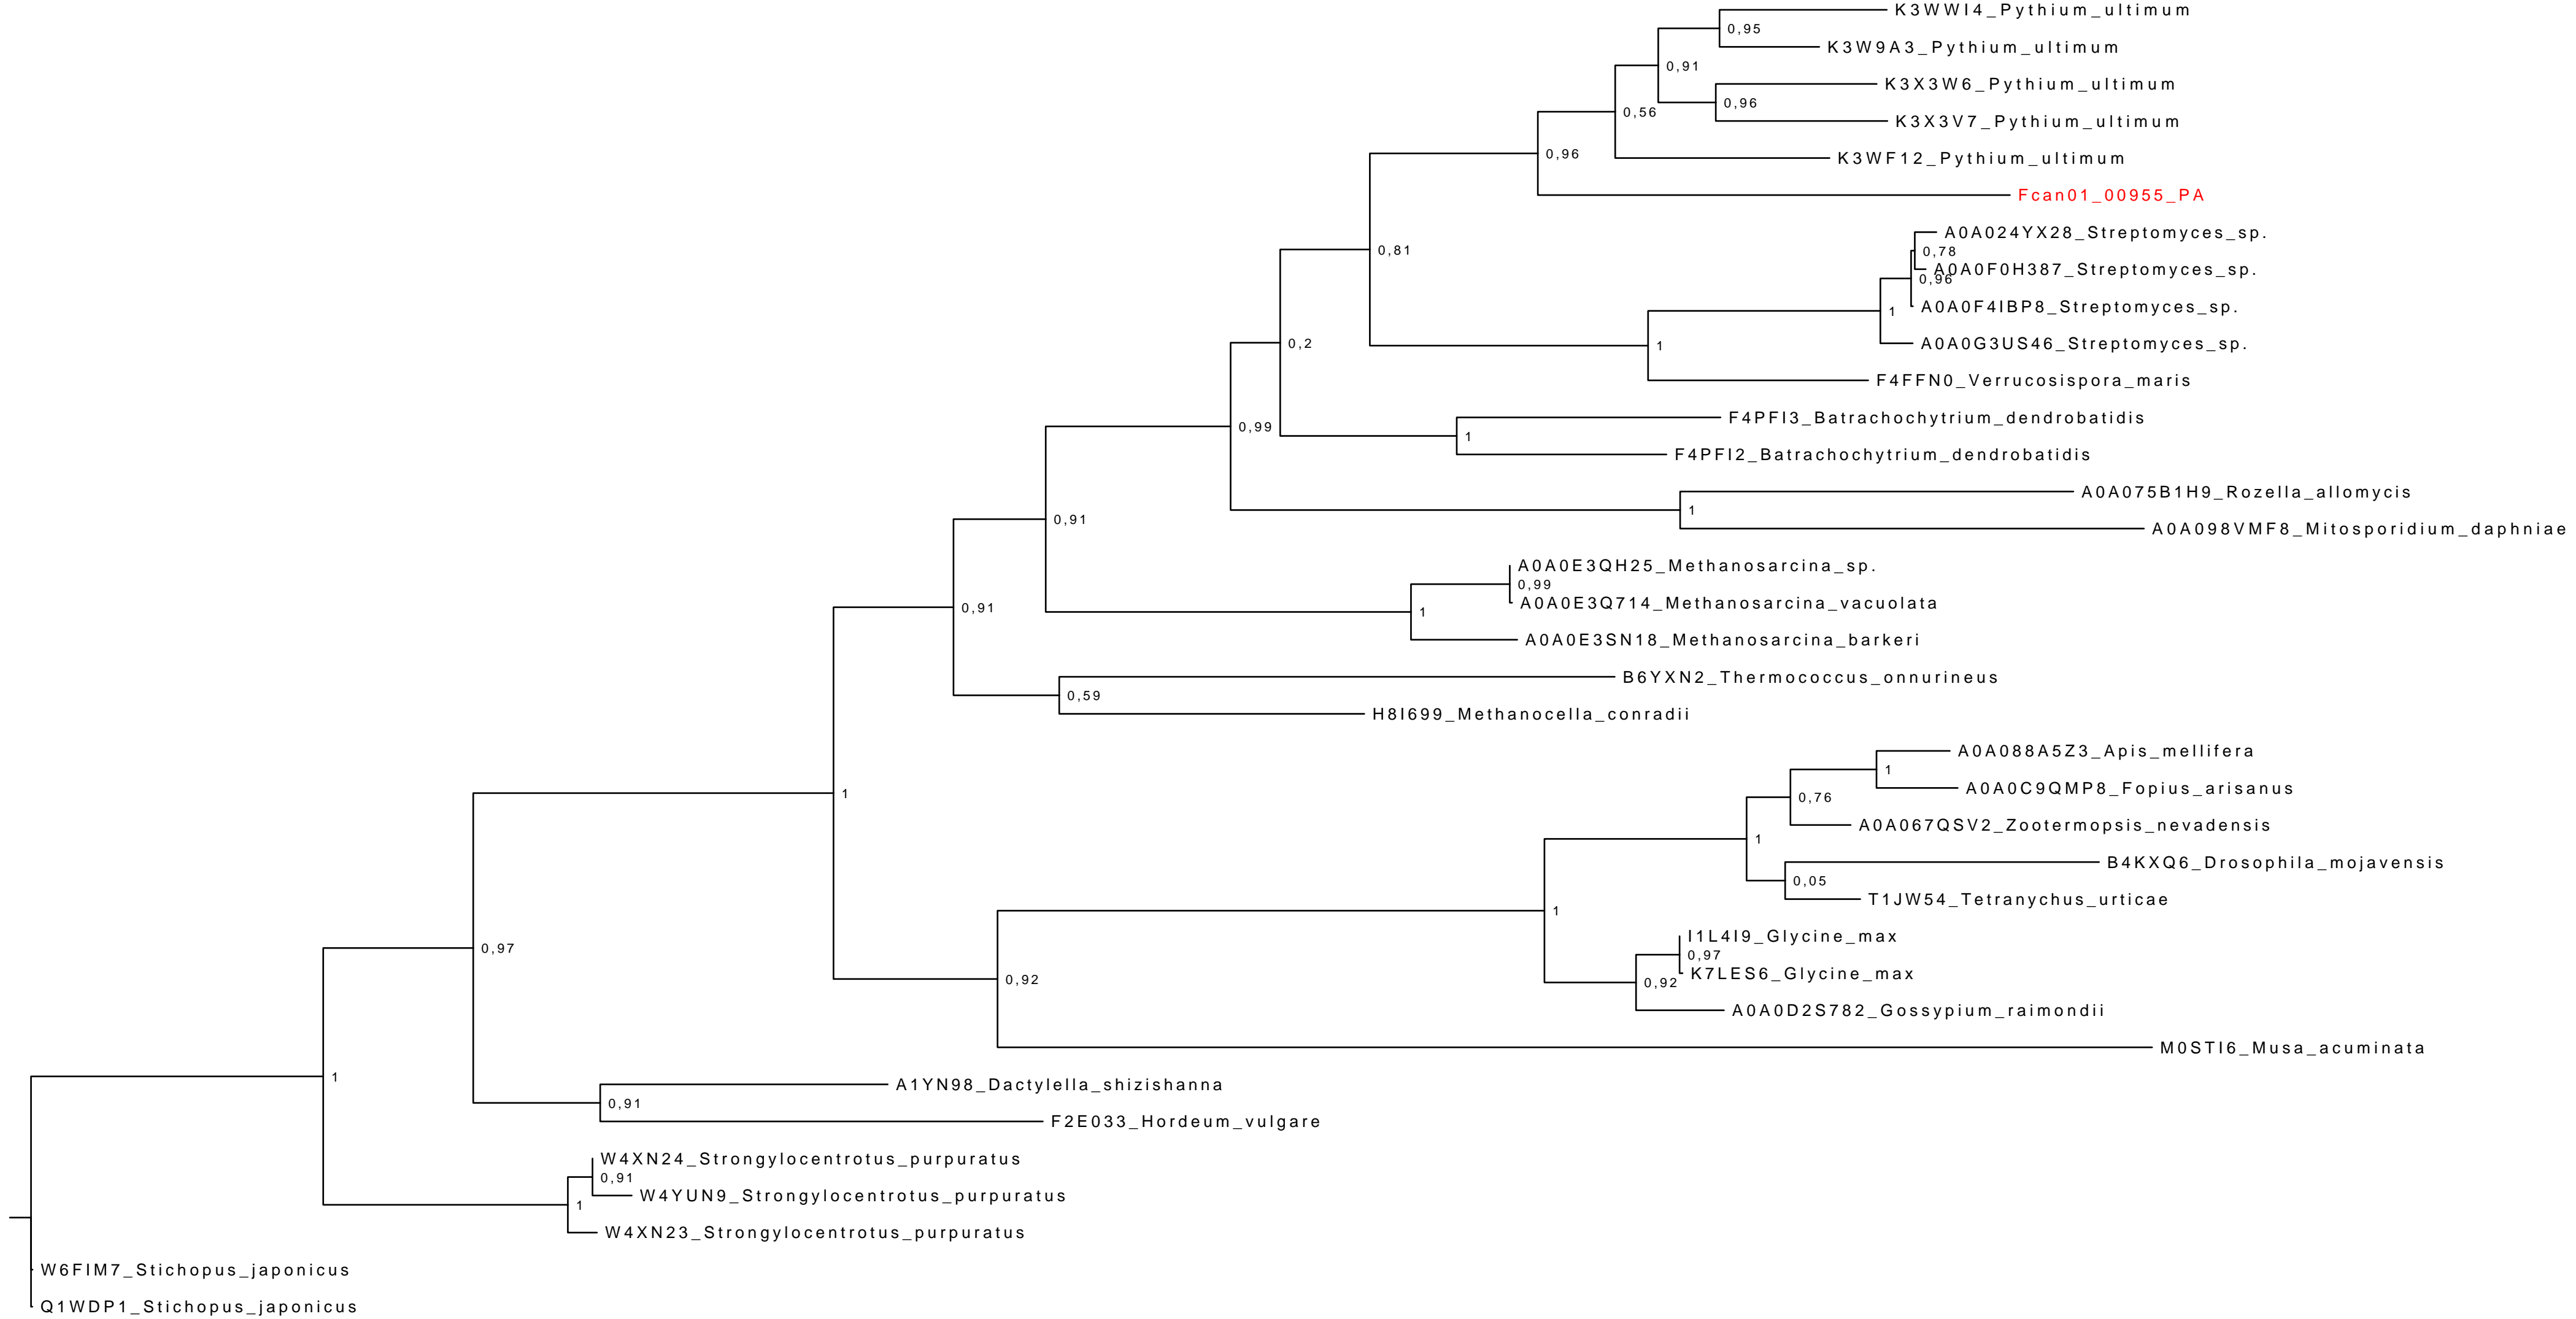



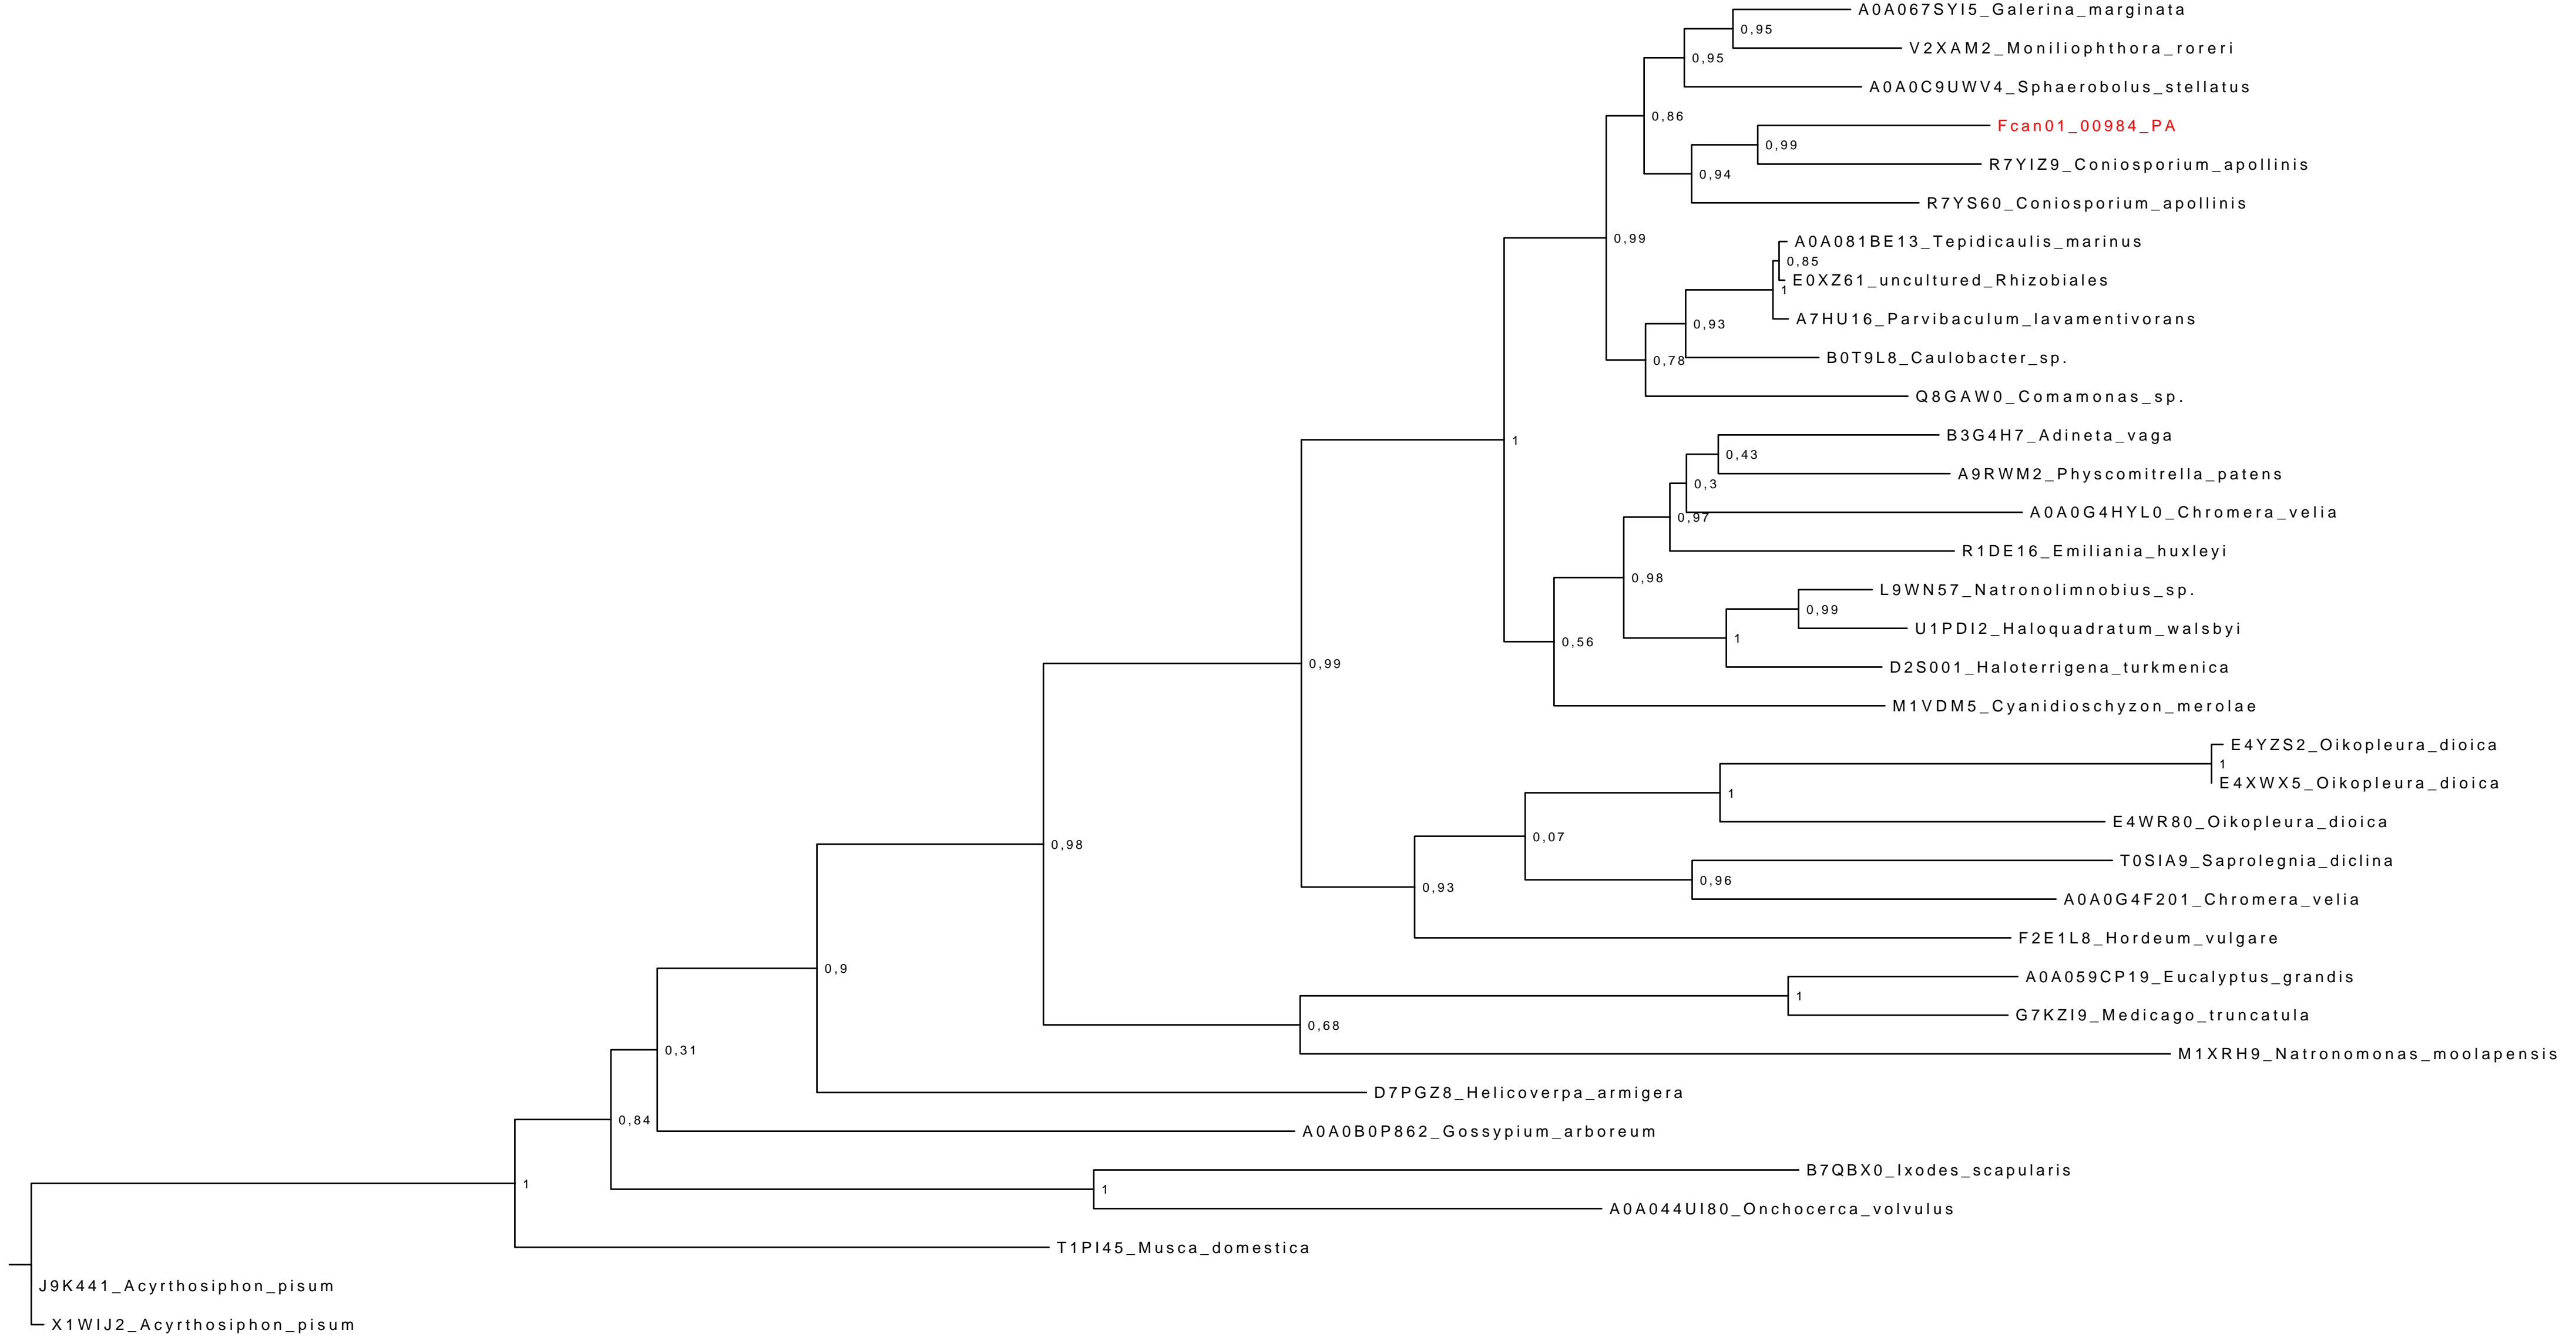

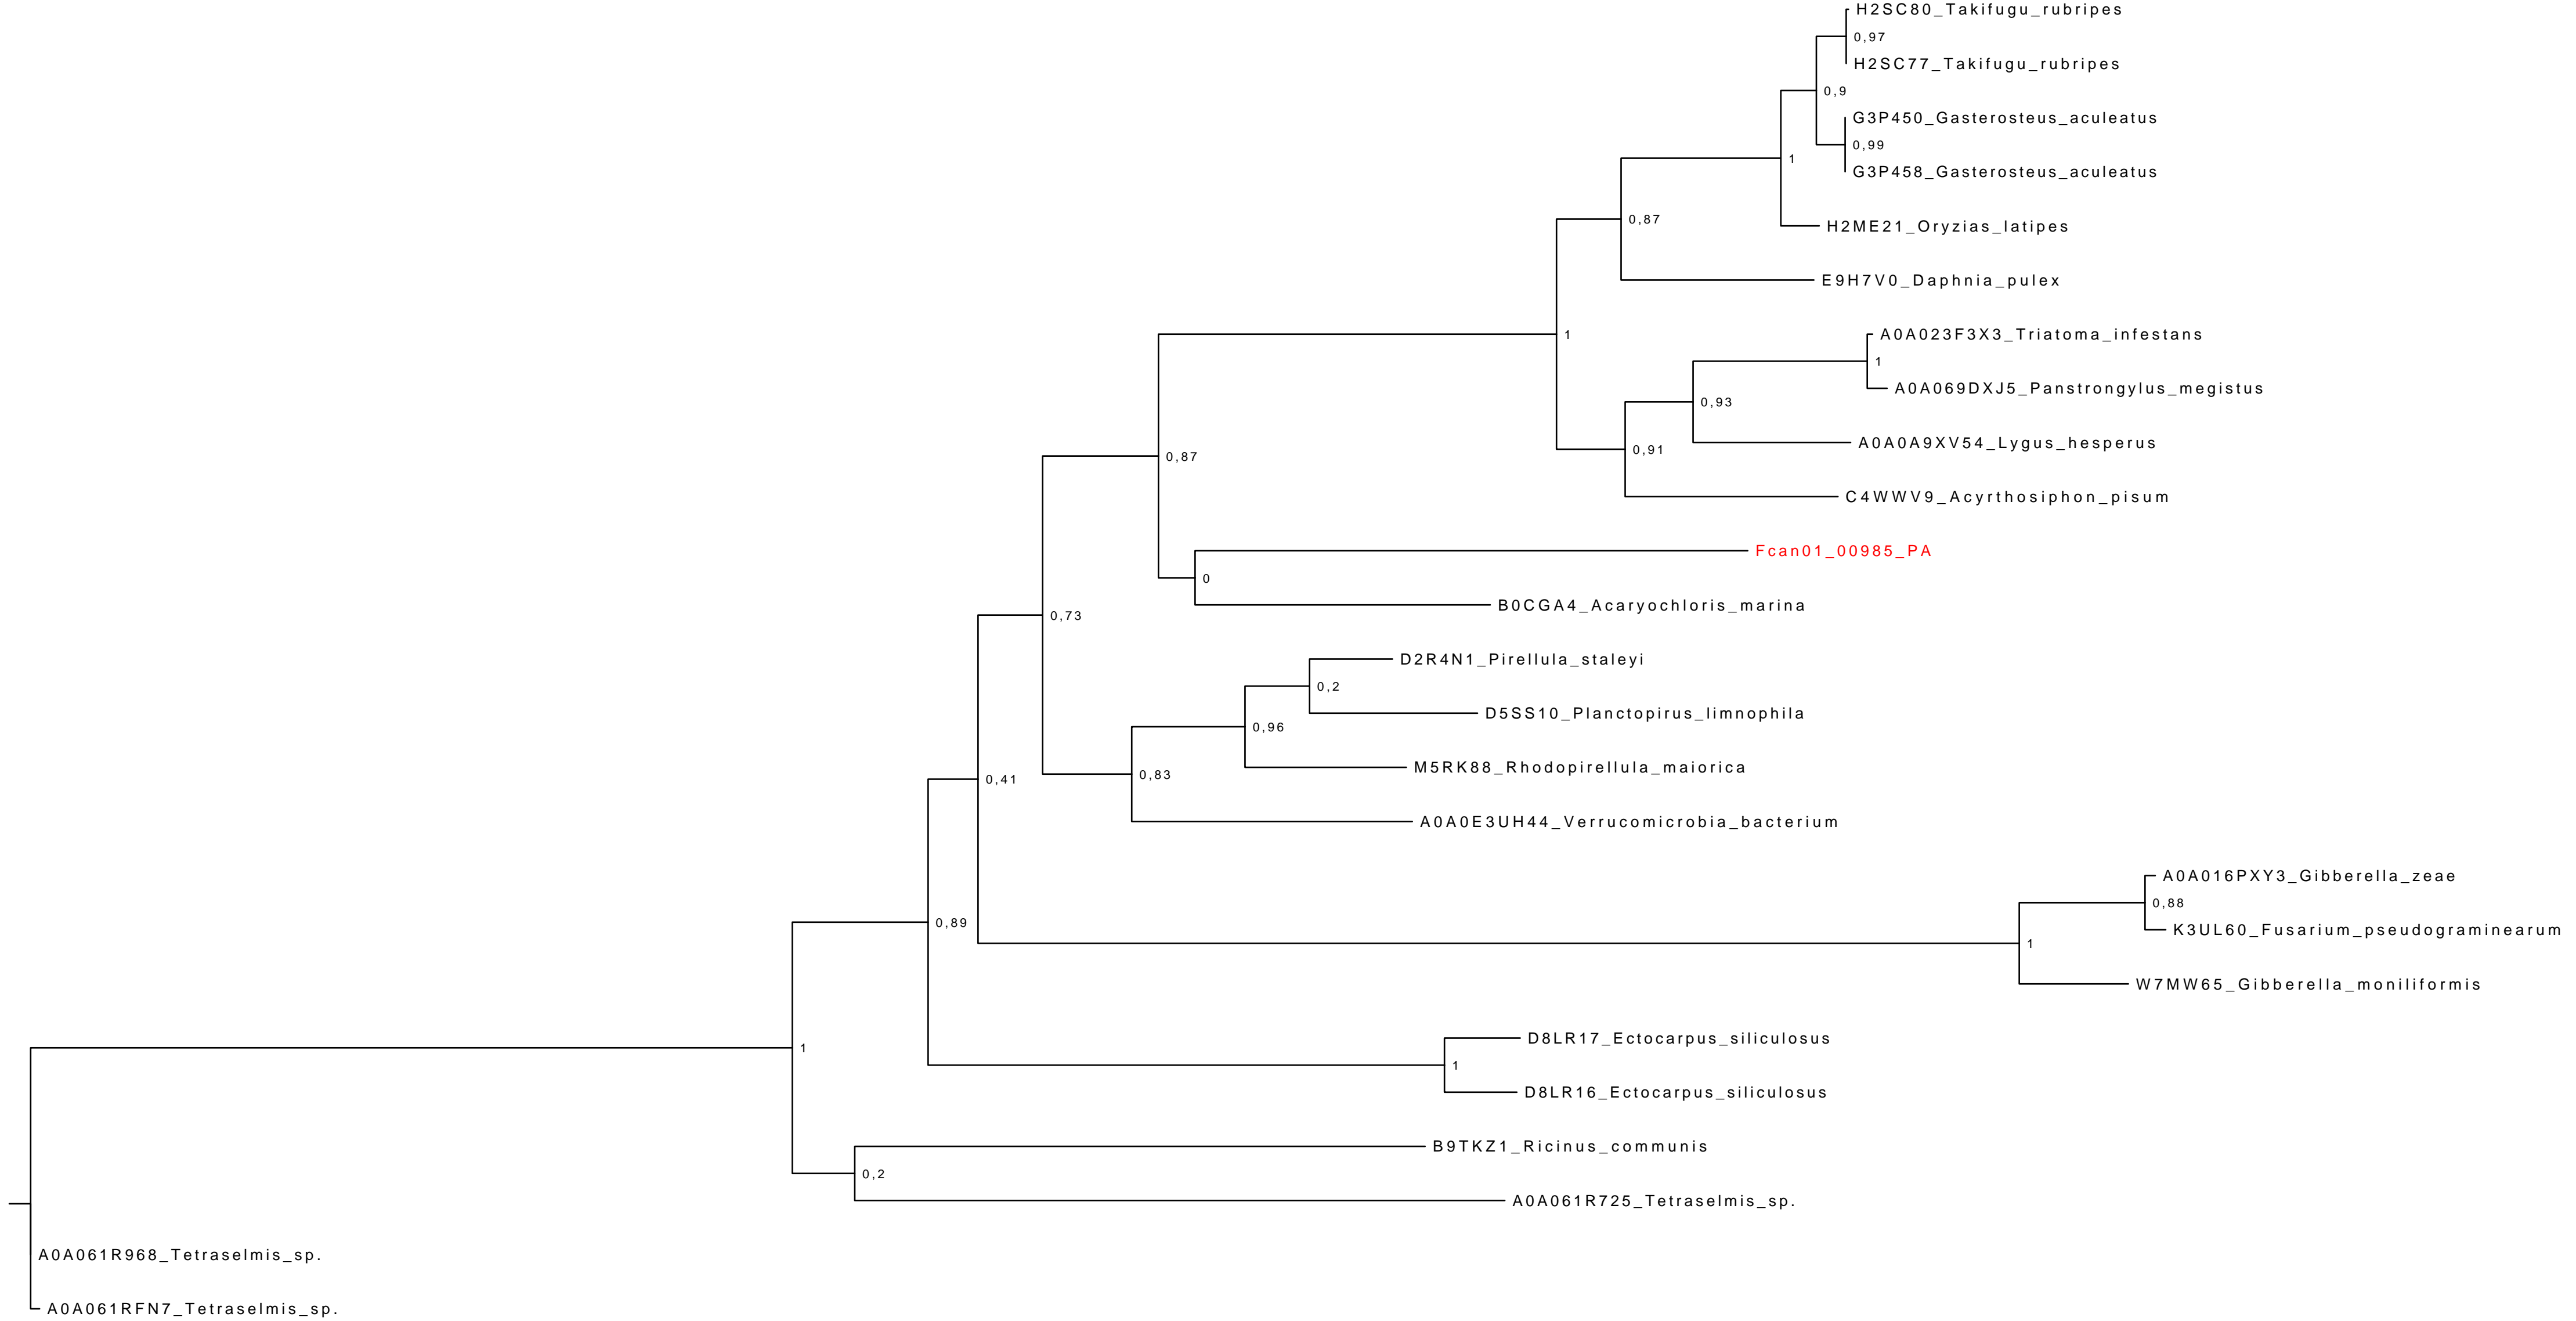

0.4

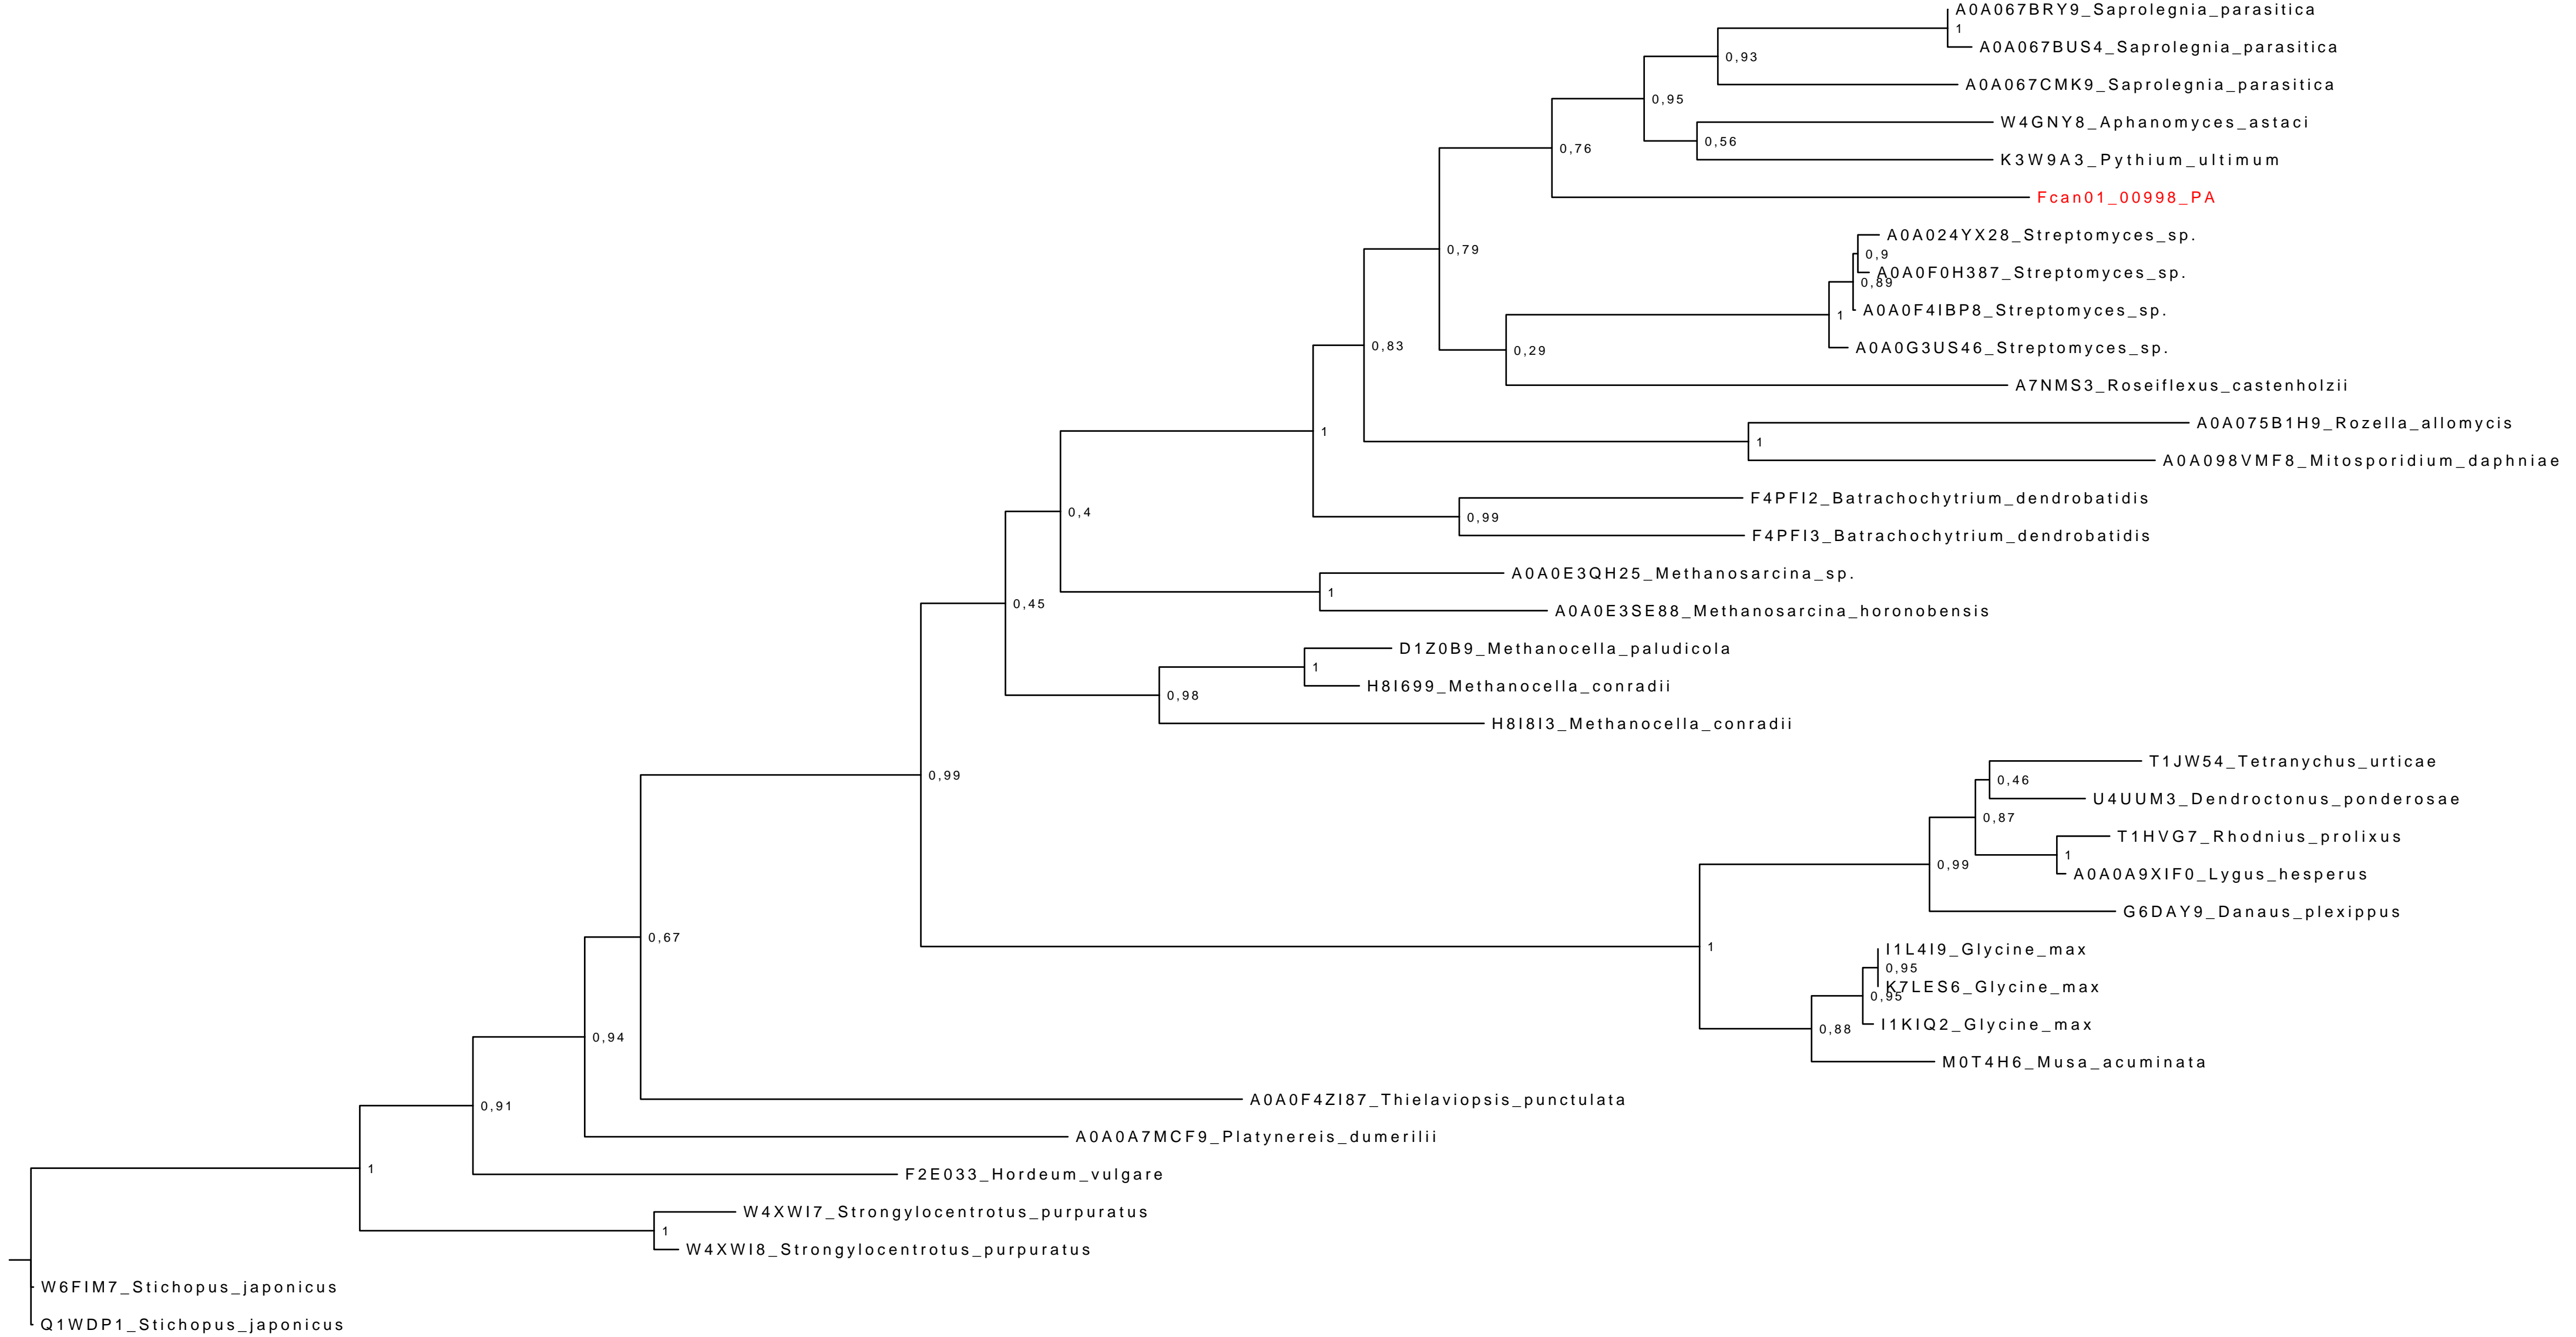

0.5

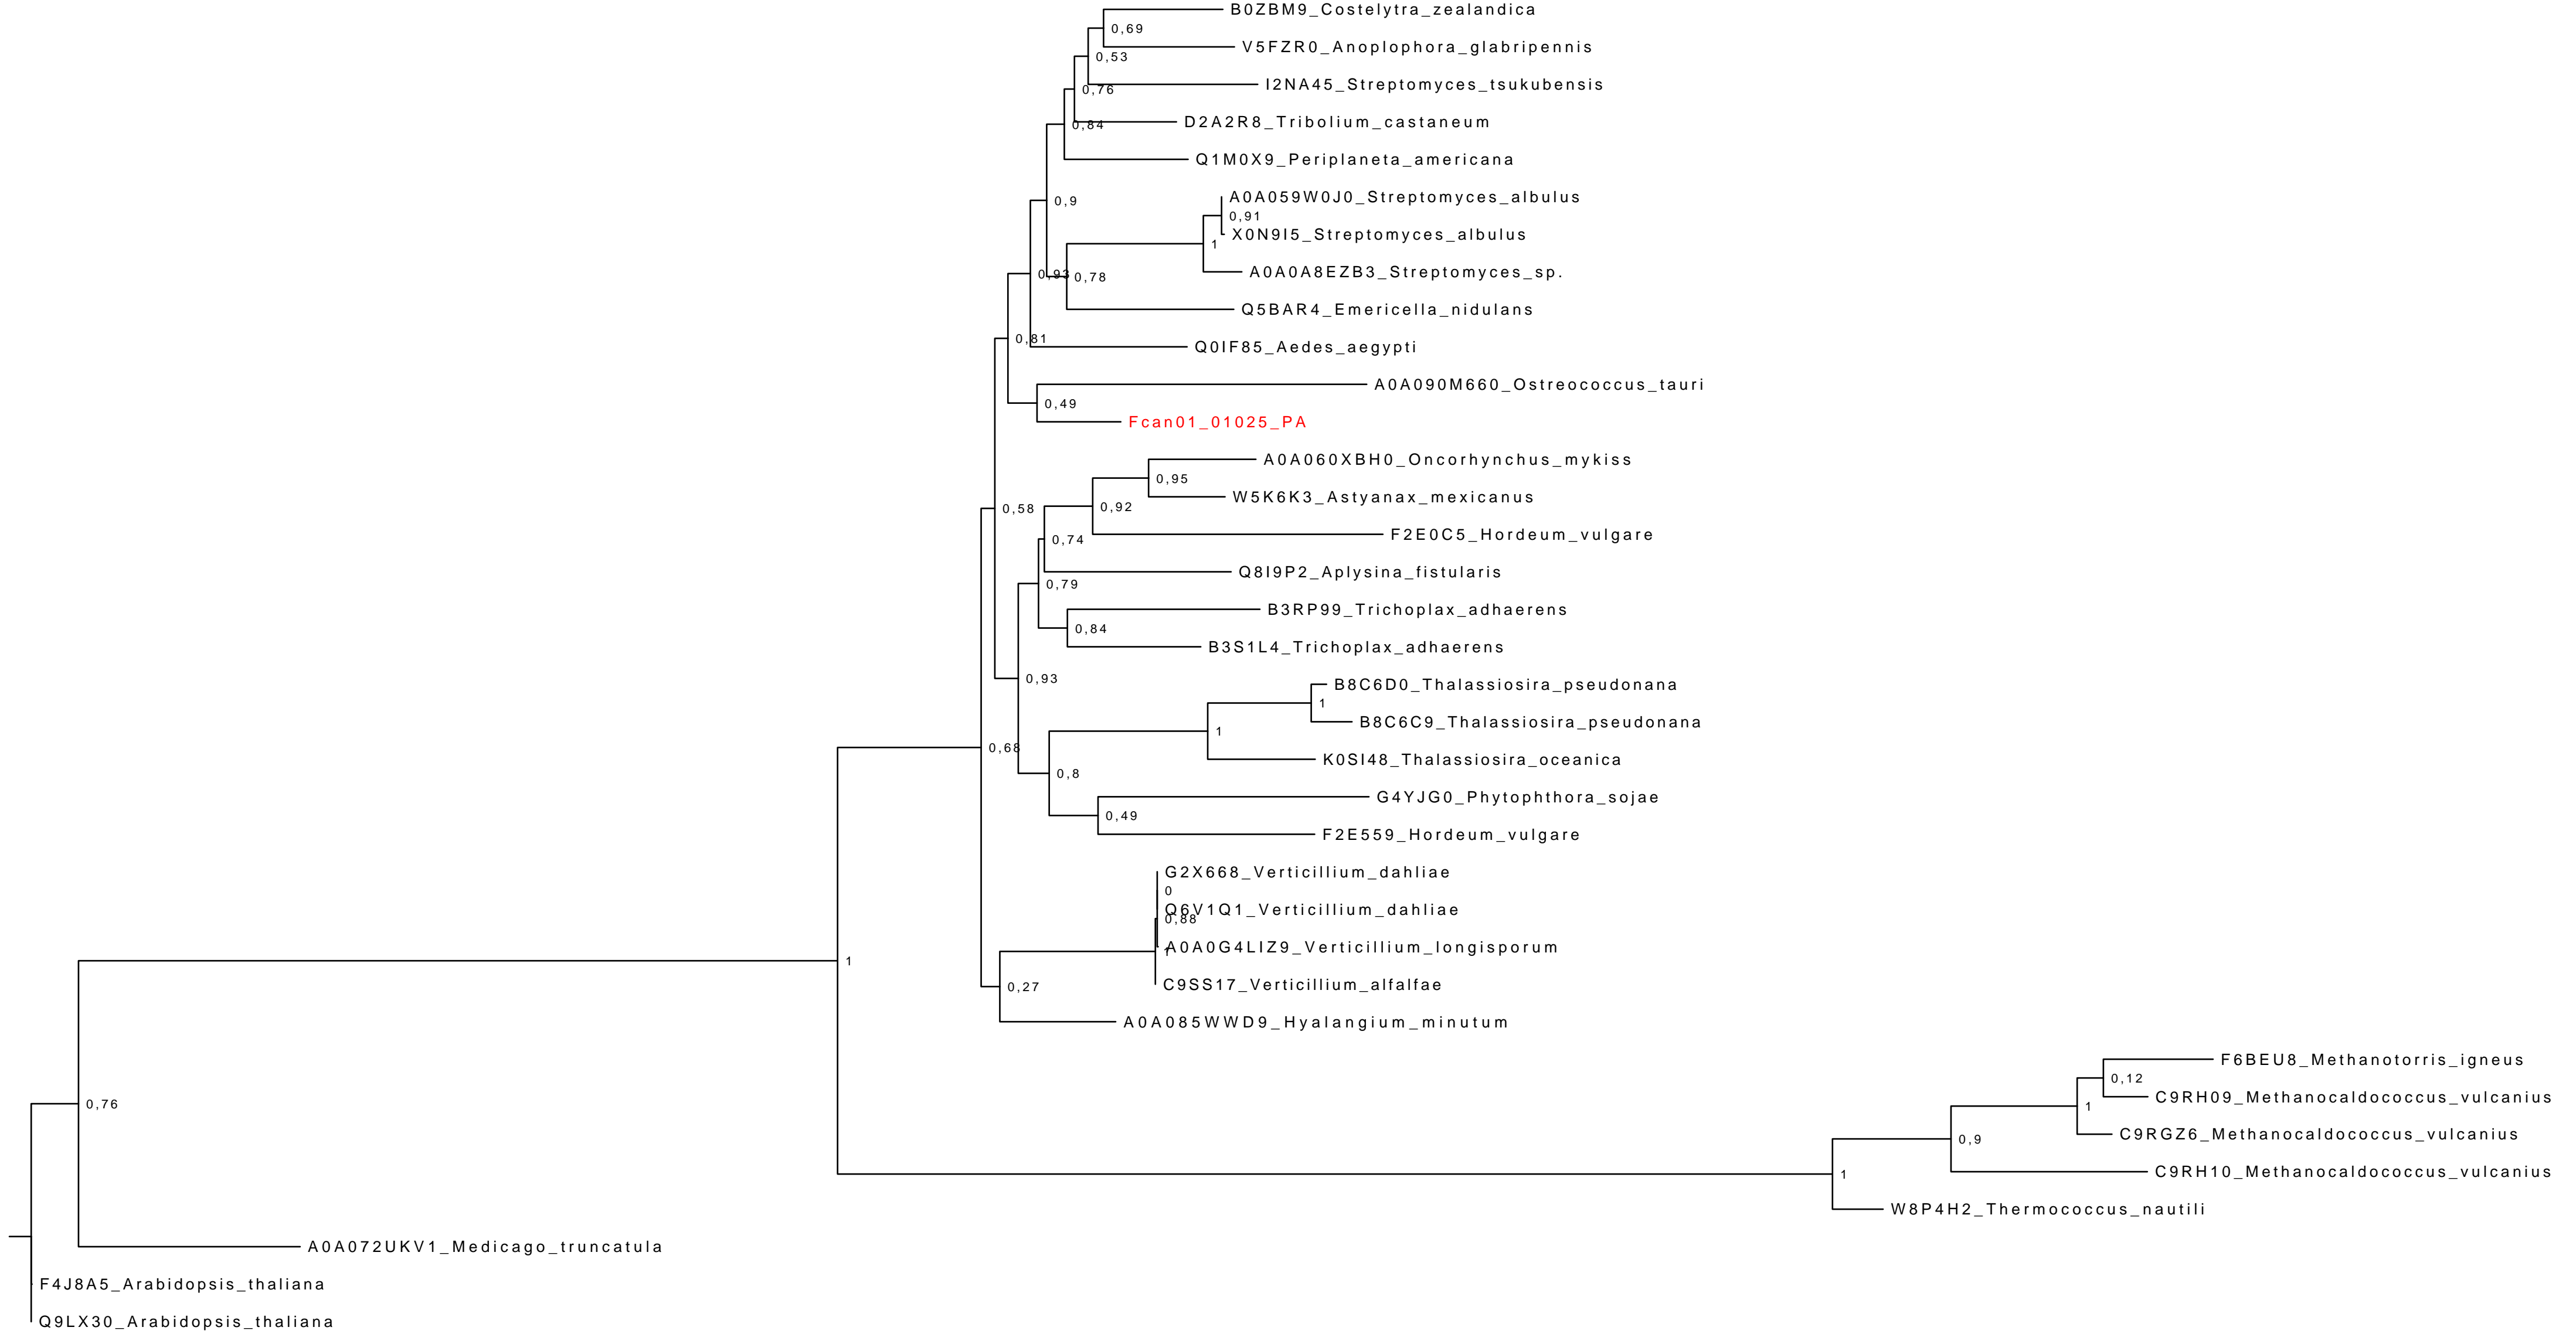

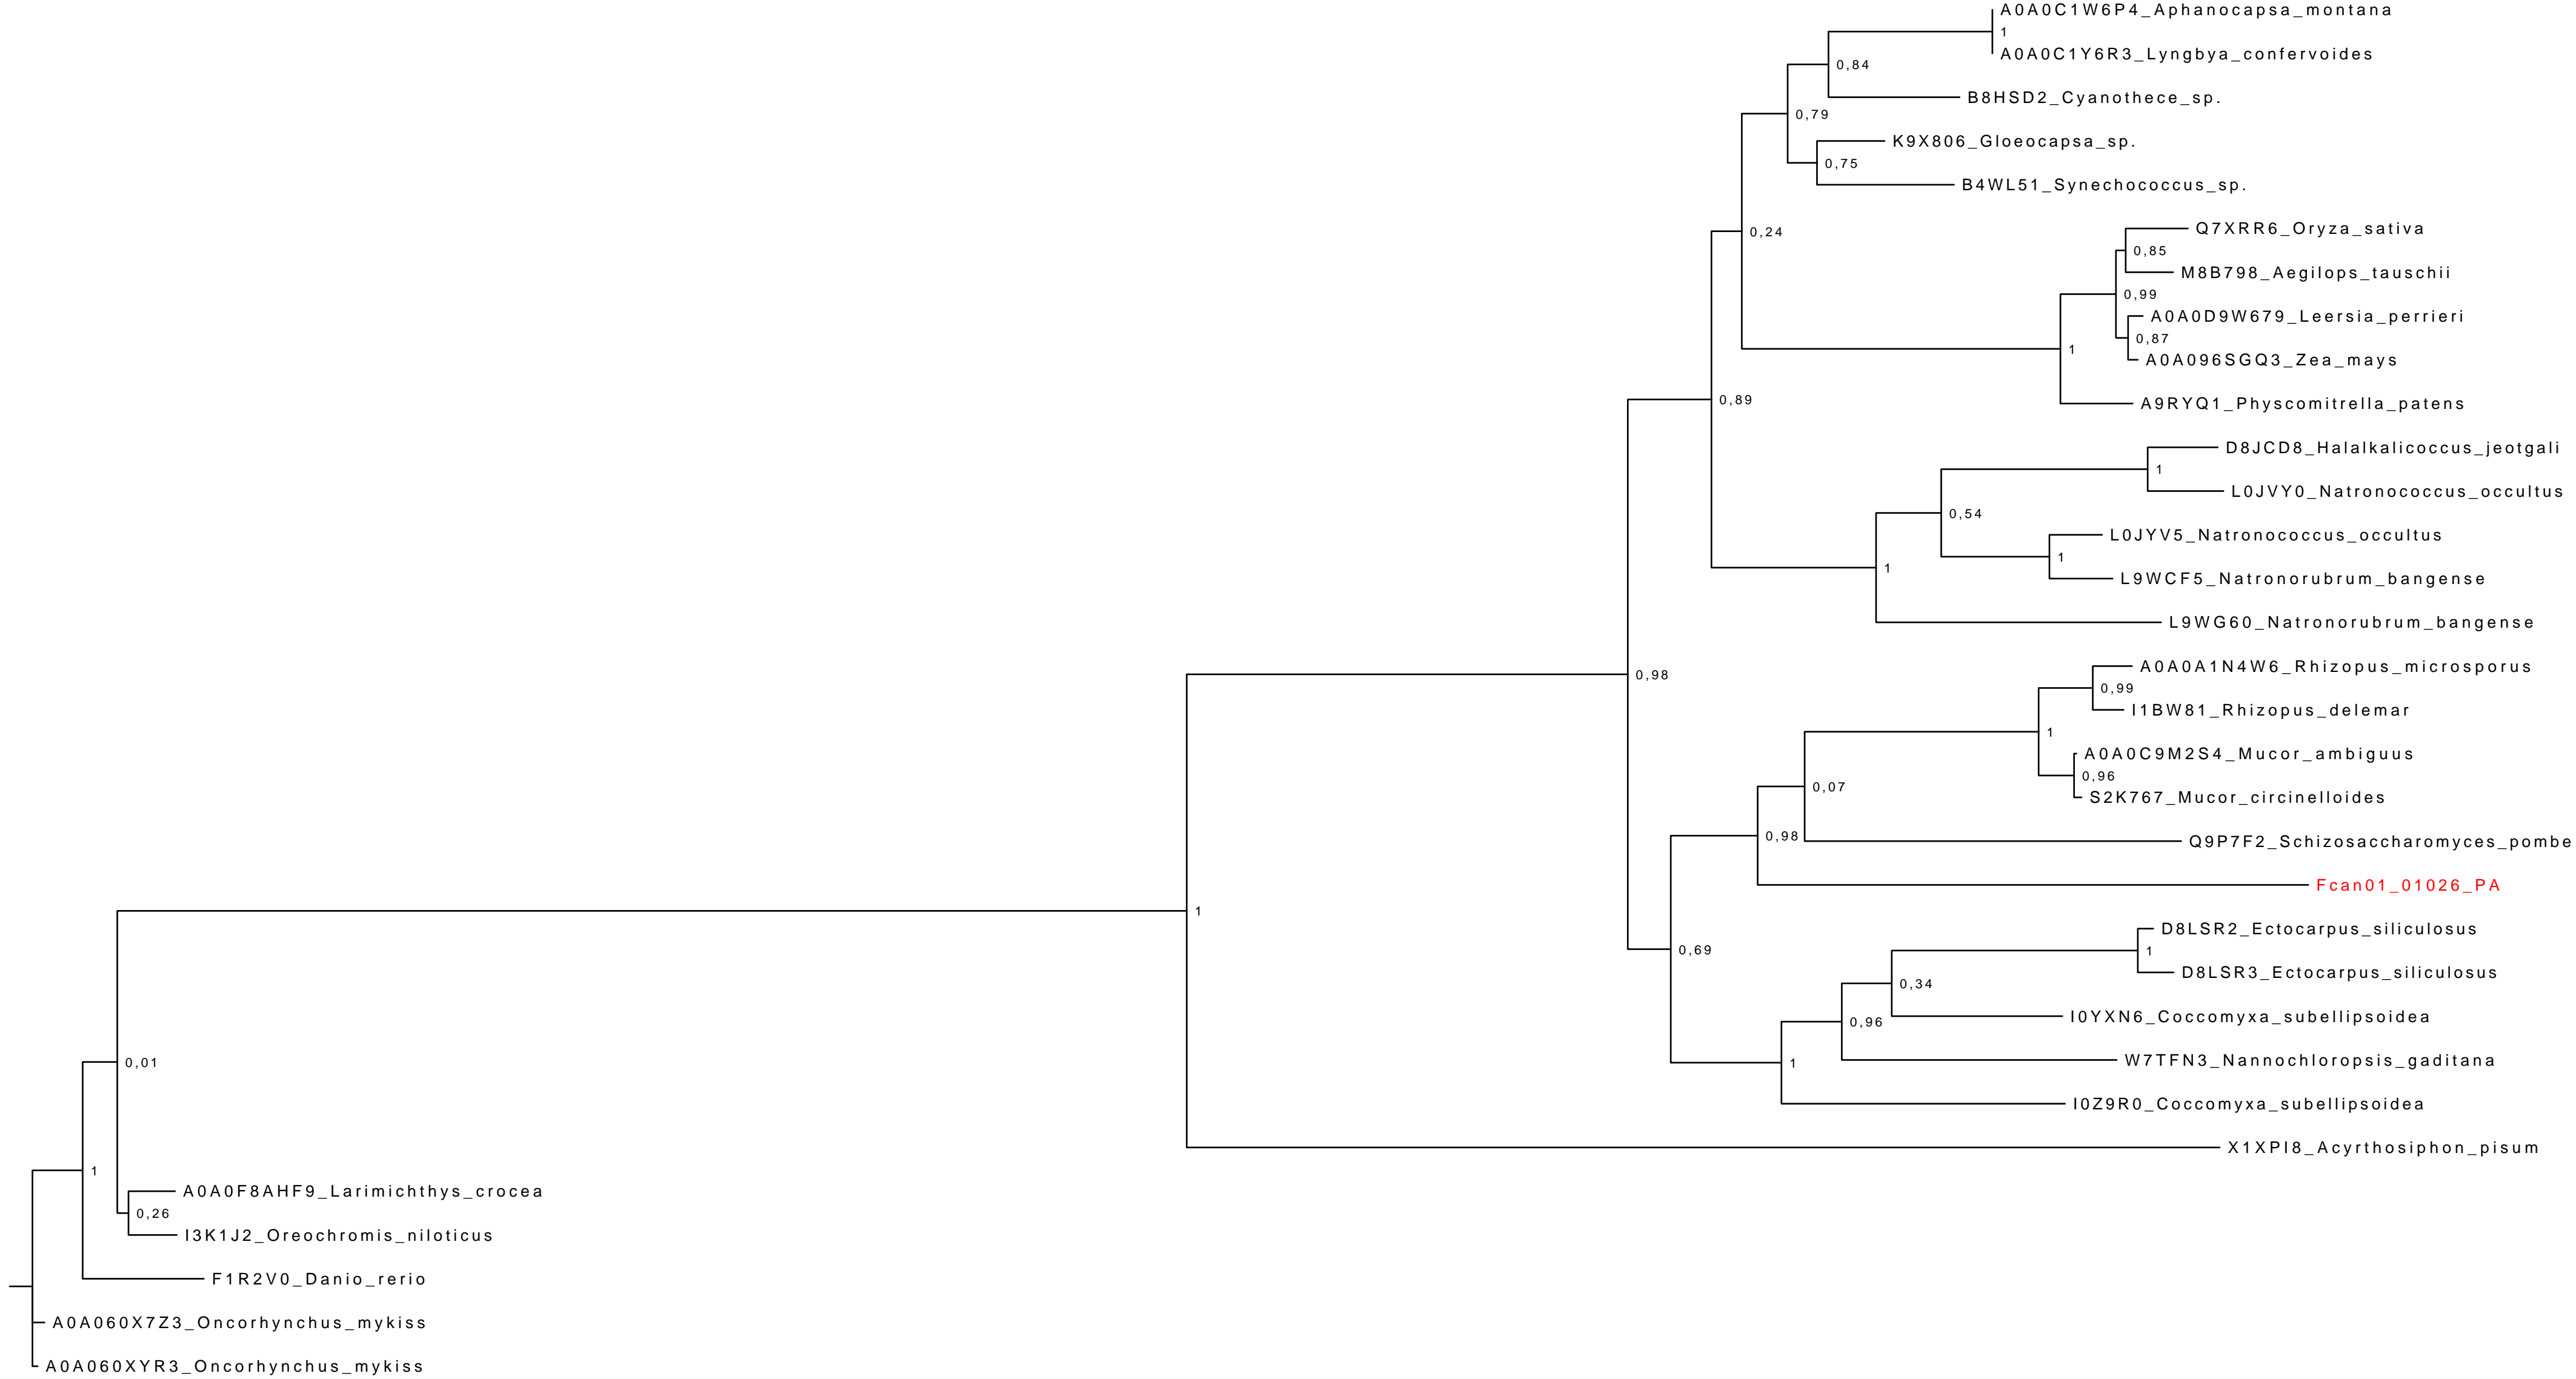

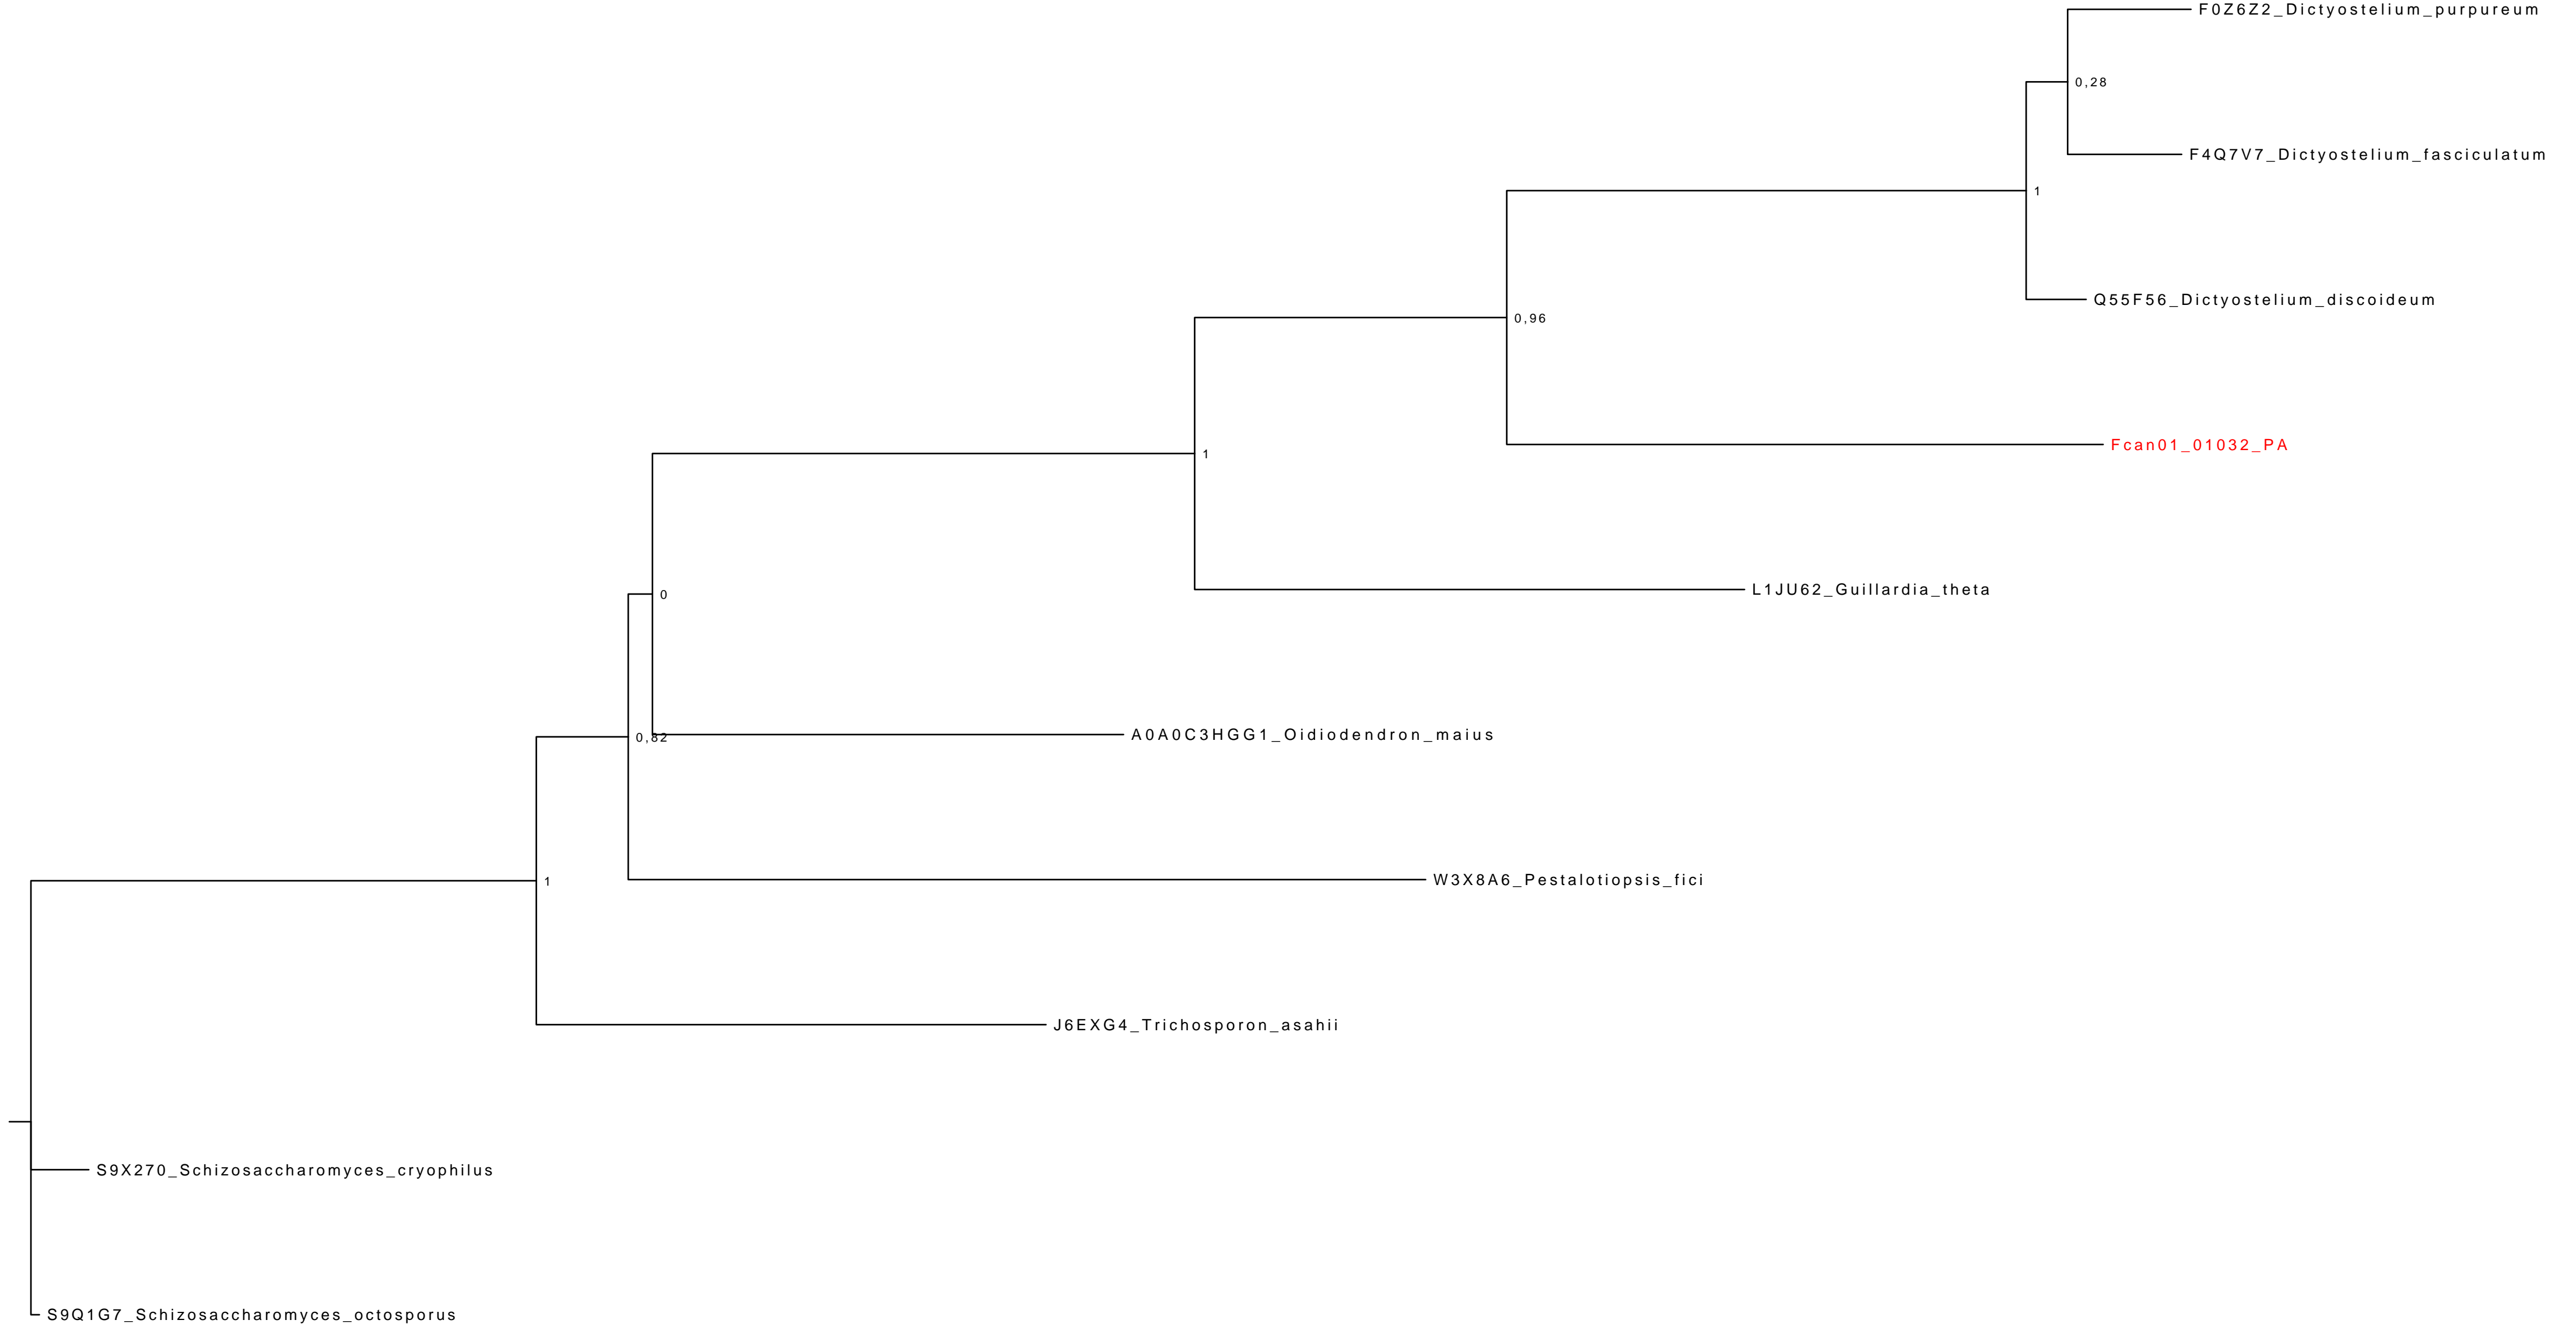

0.4

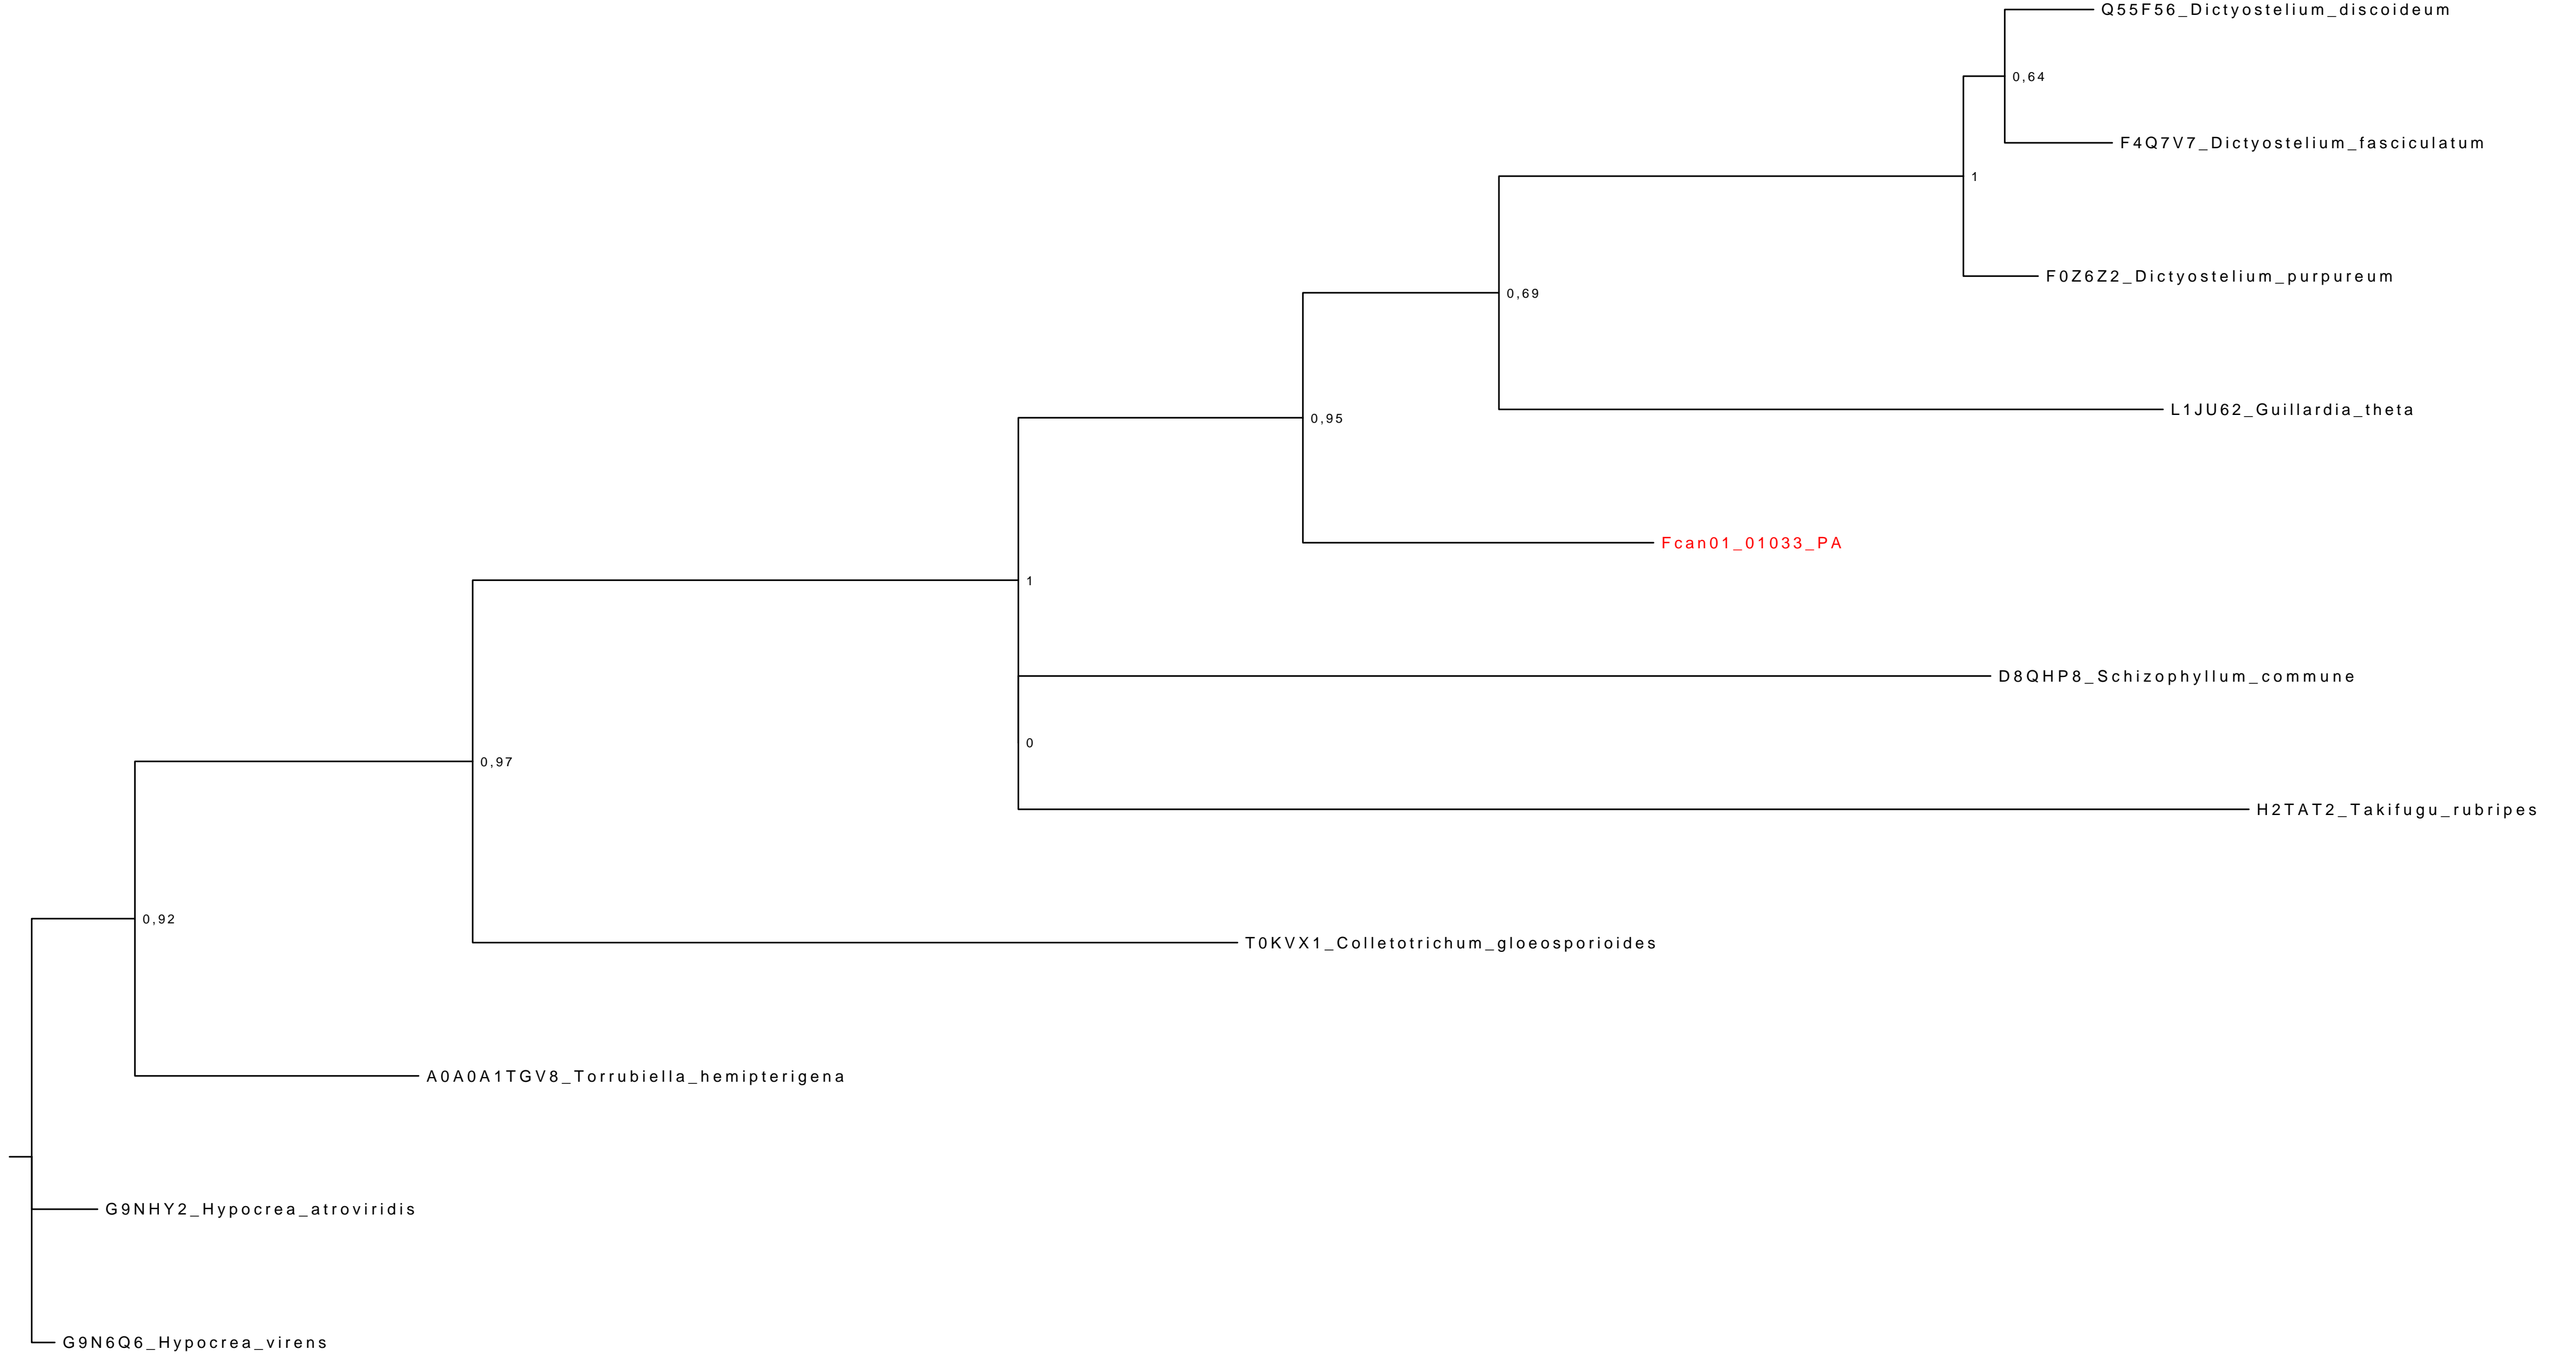

0.5

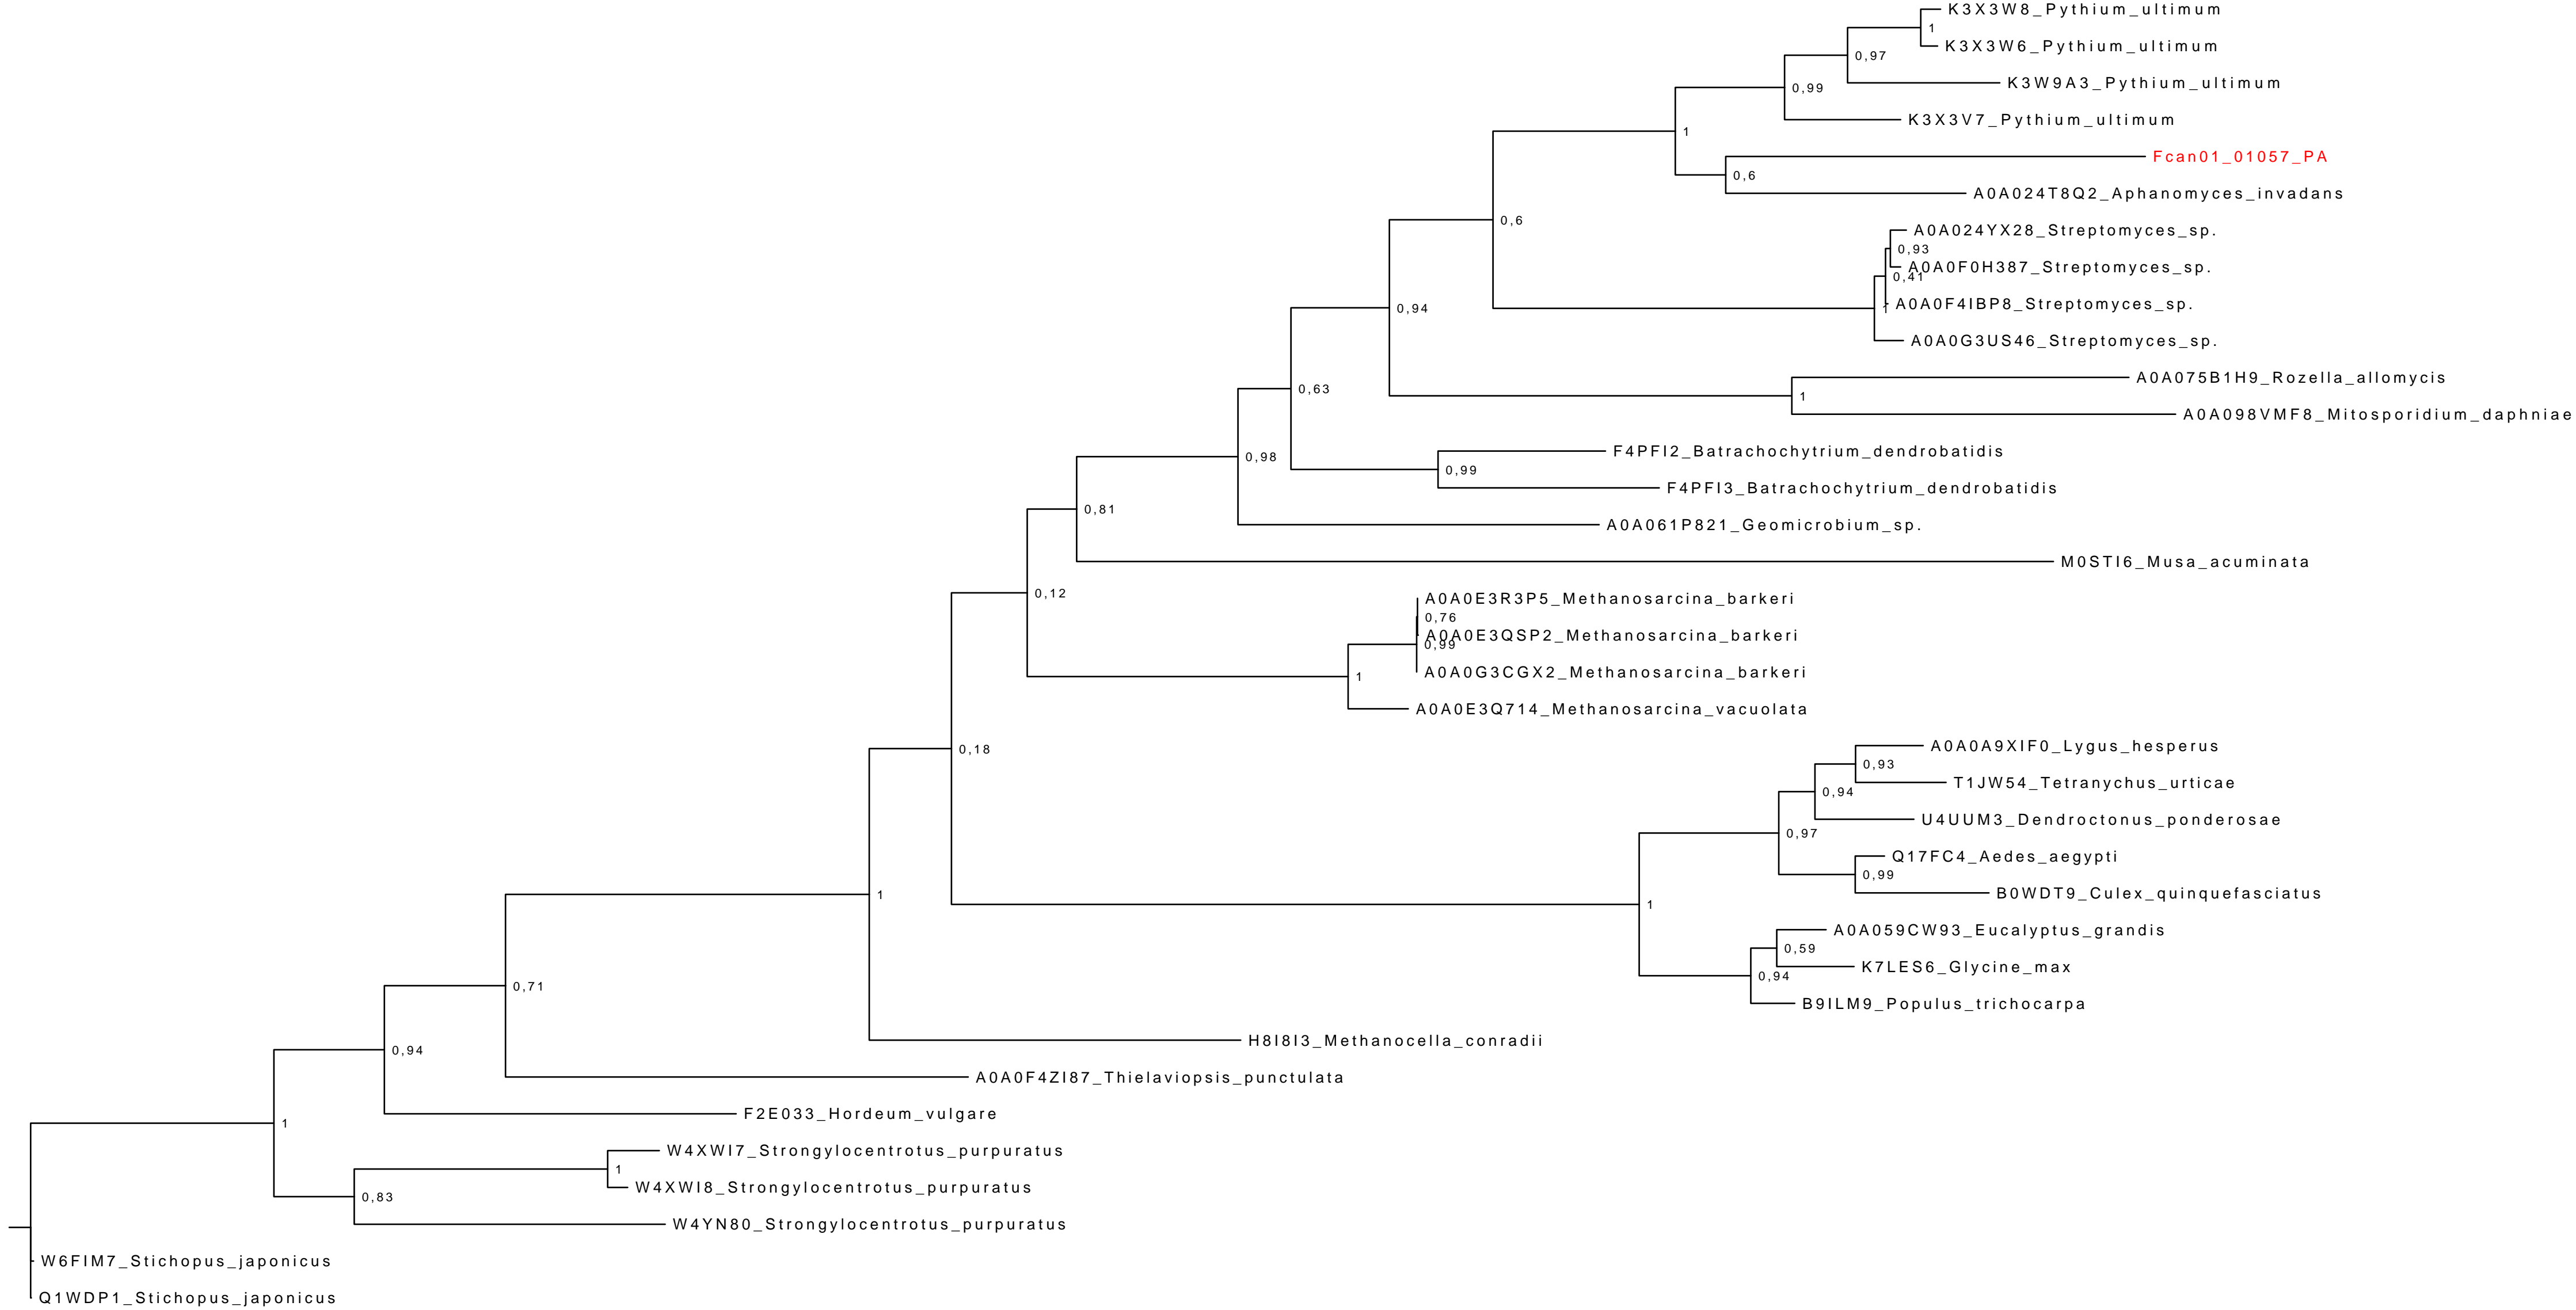

0.5



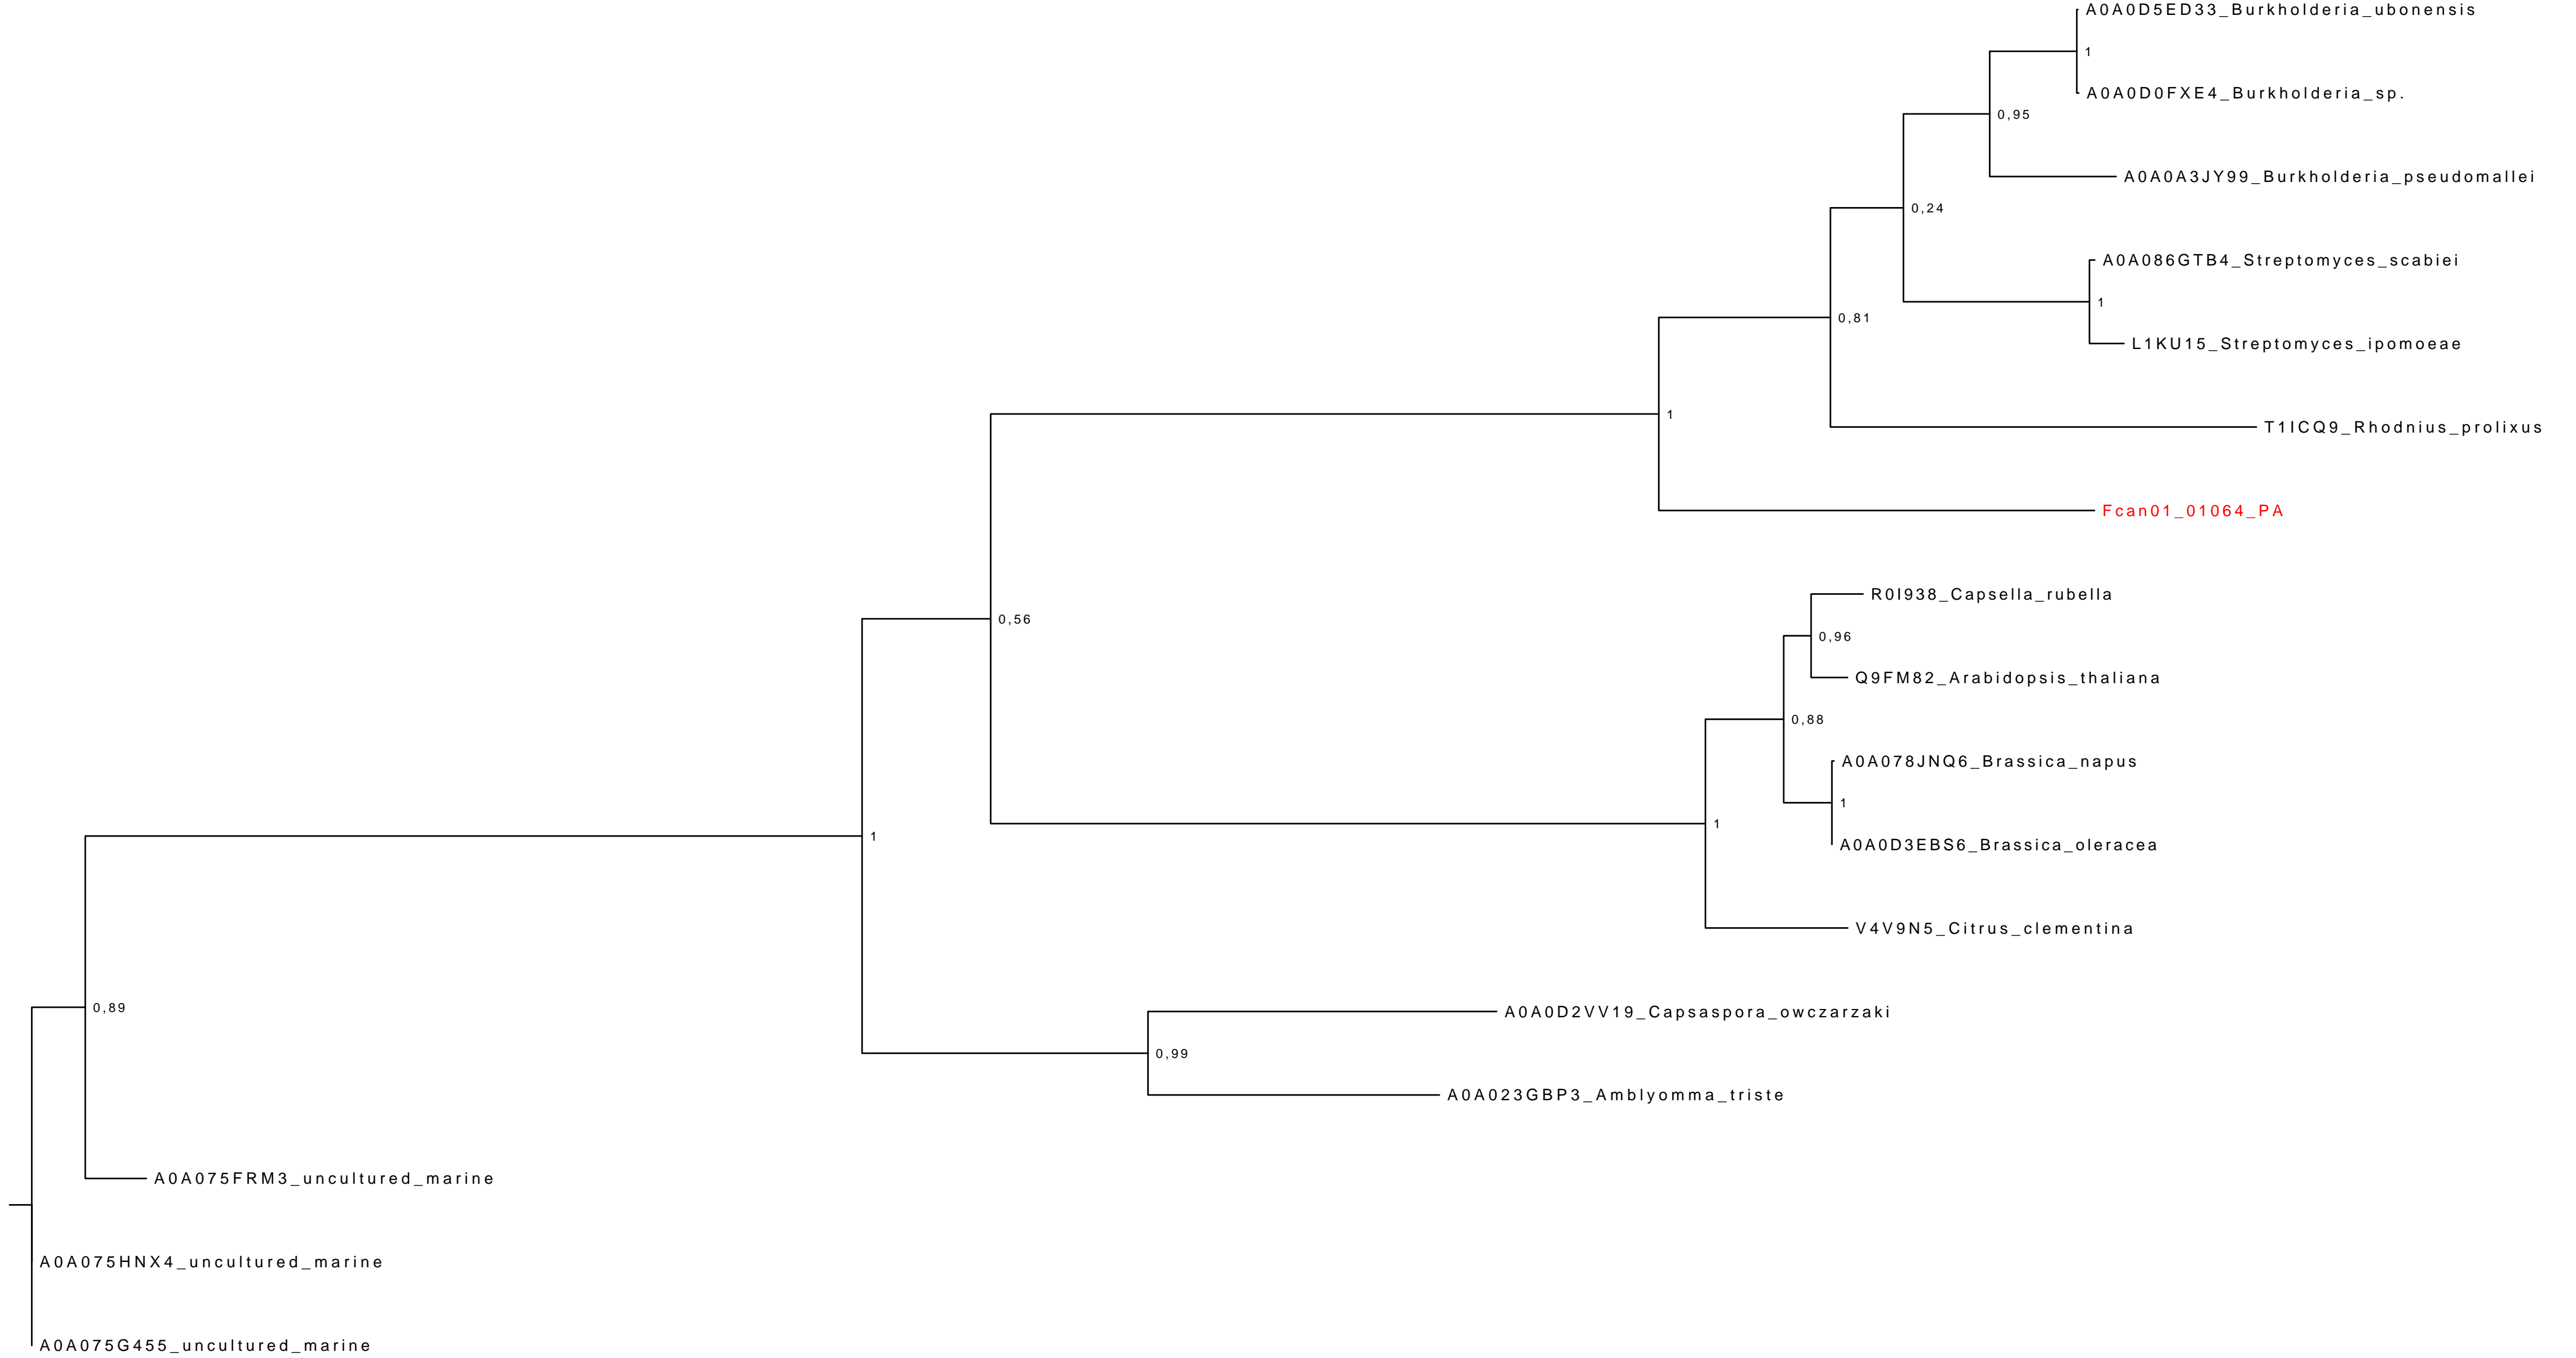

0.5



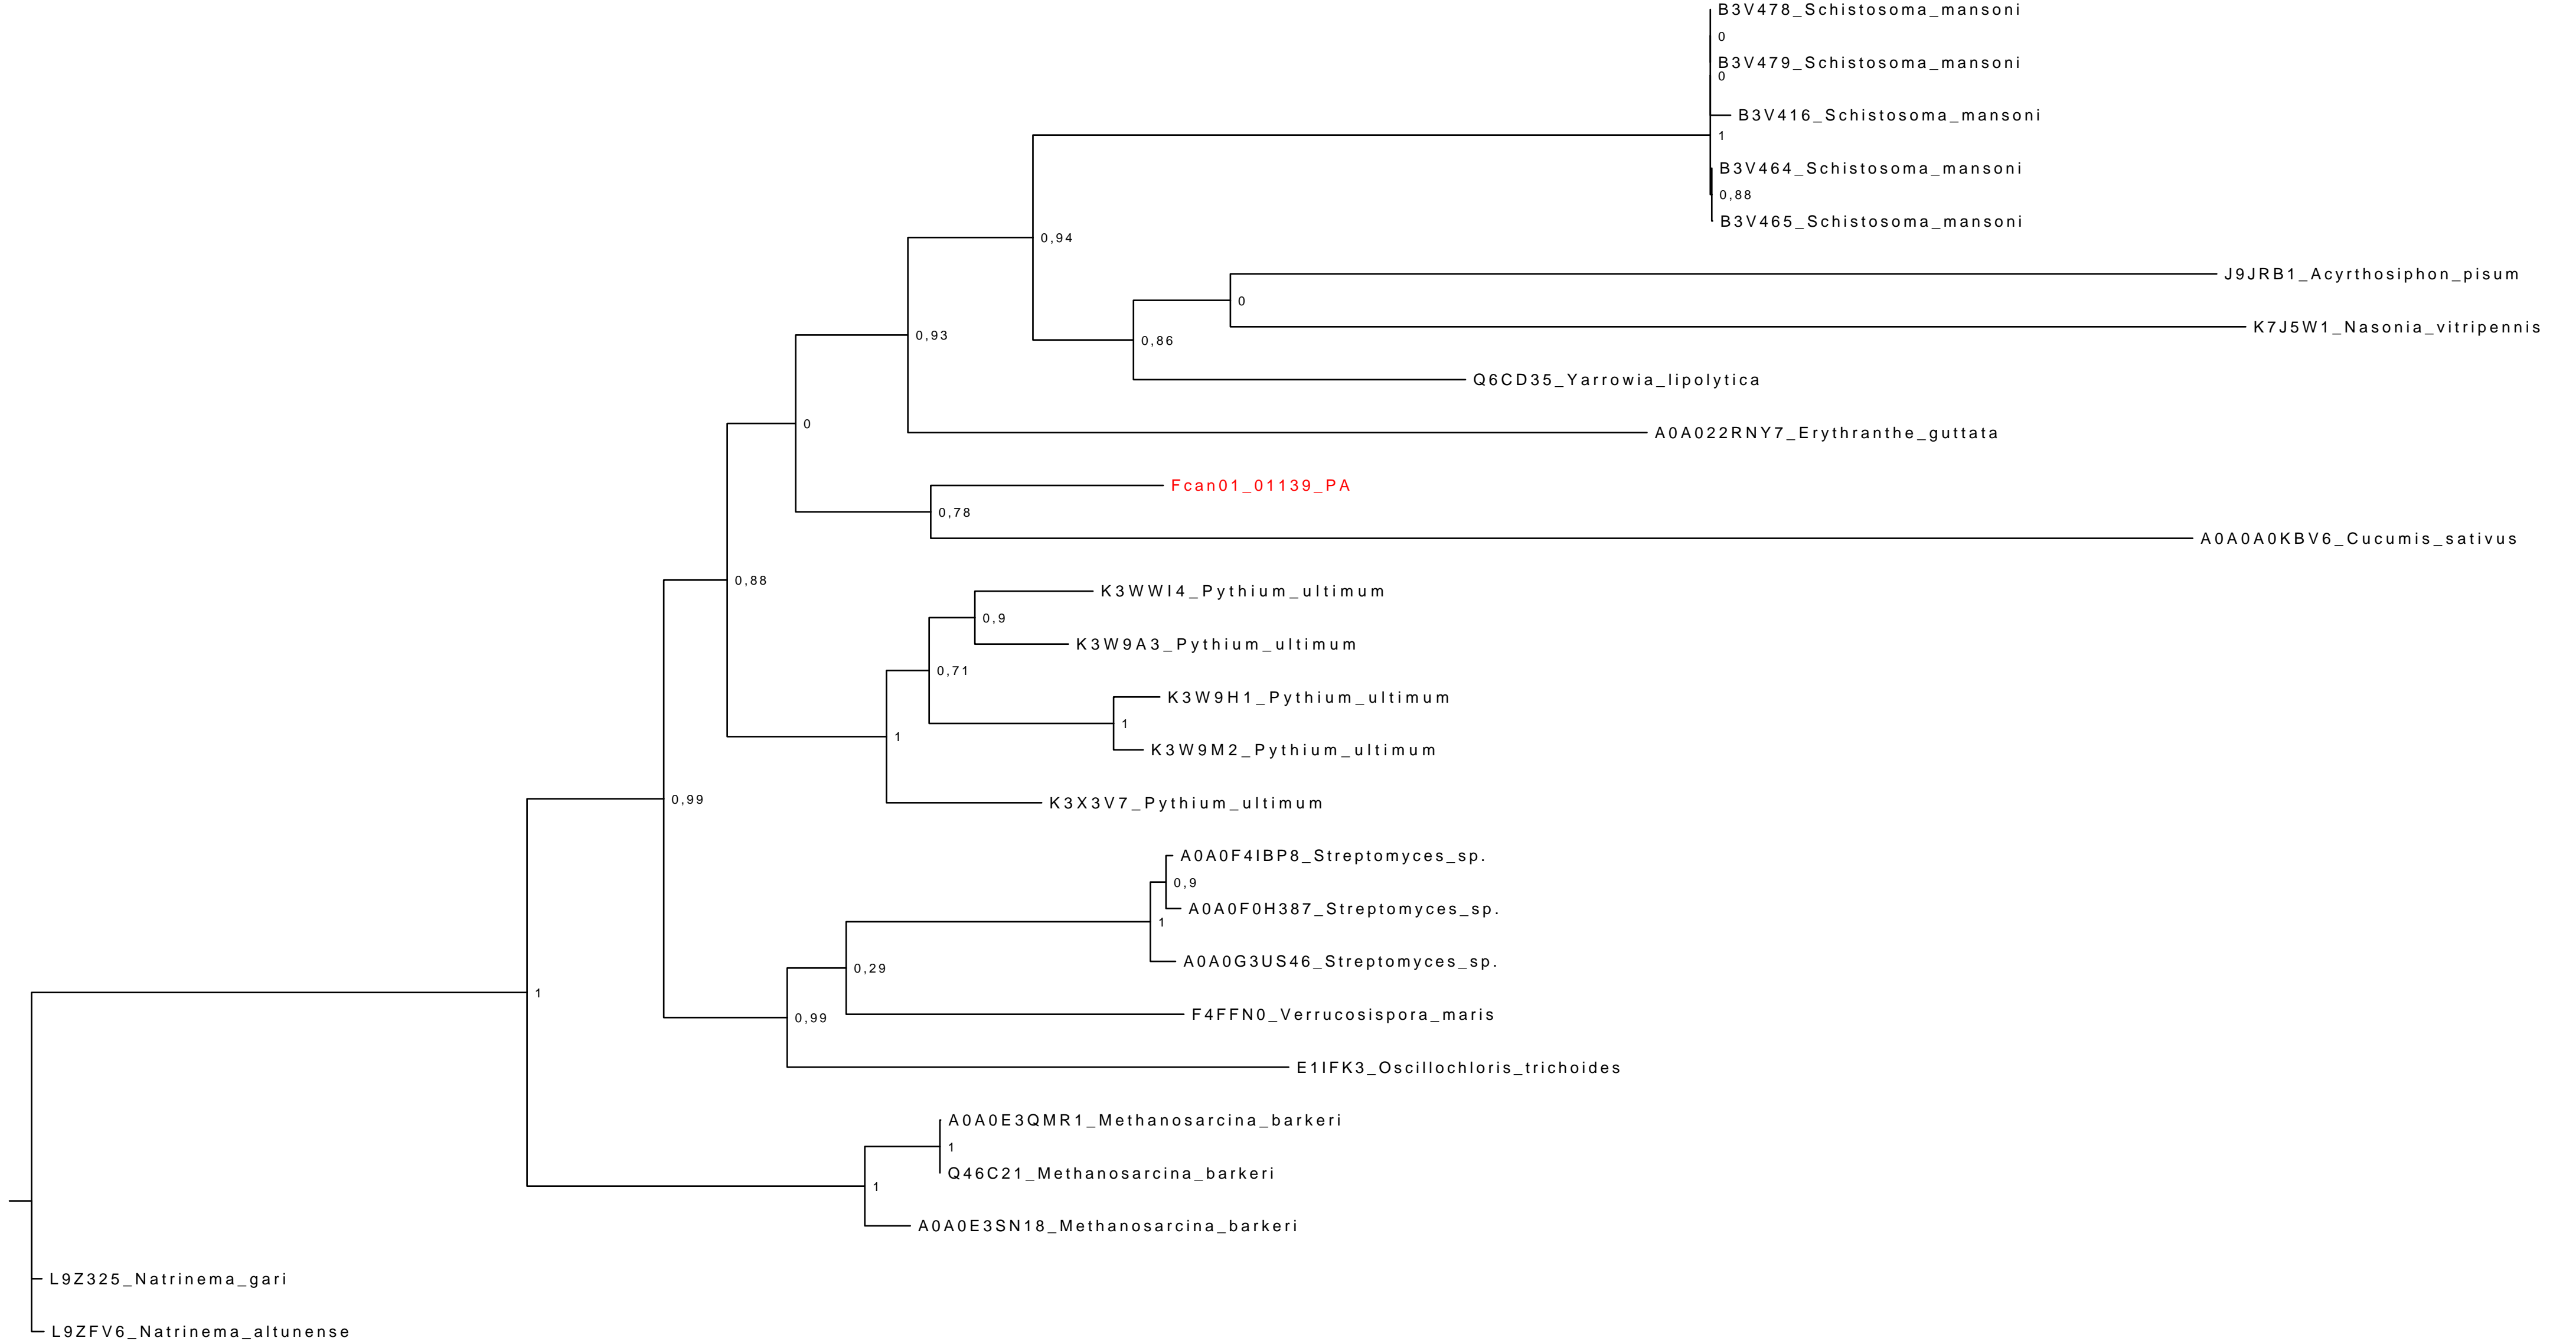

0.6

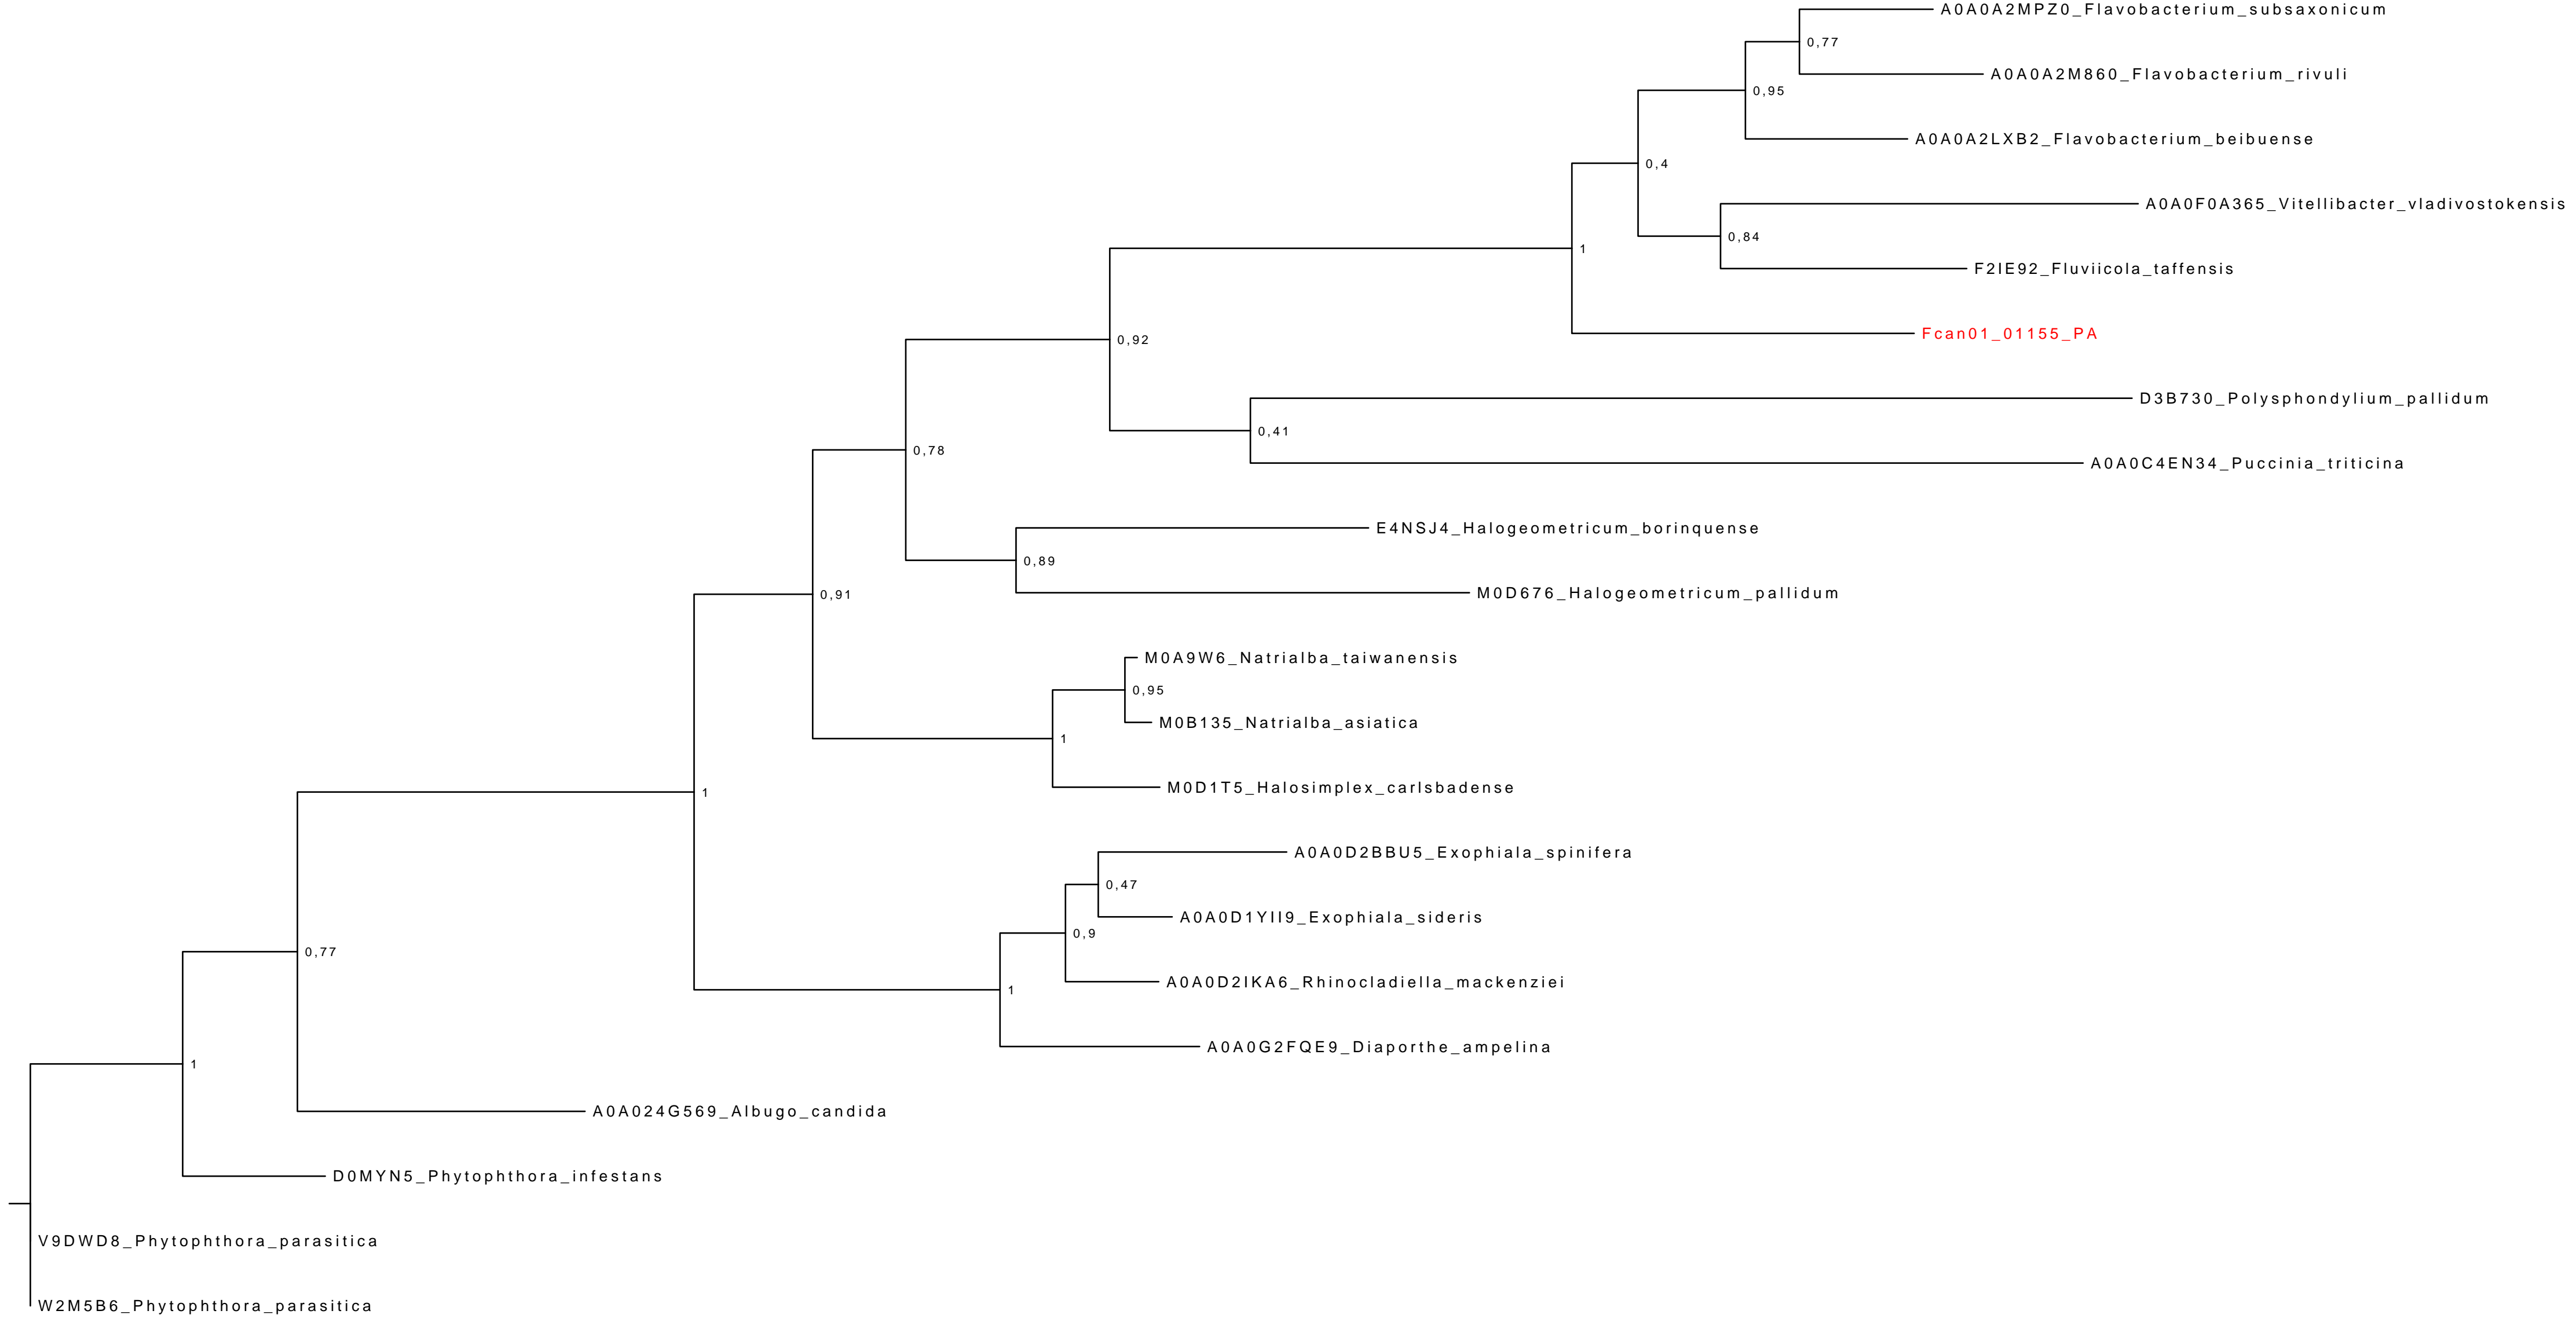

0.5

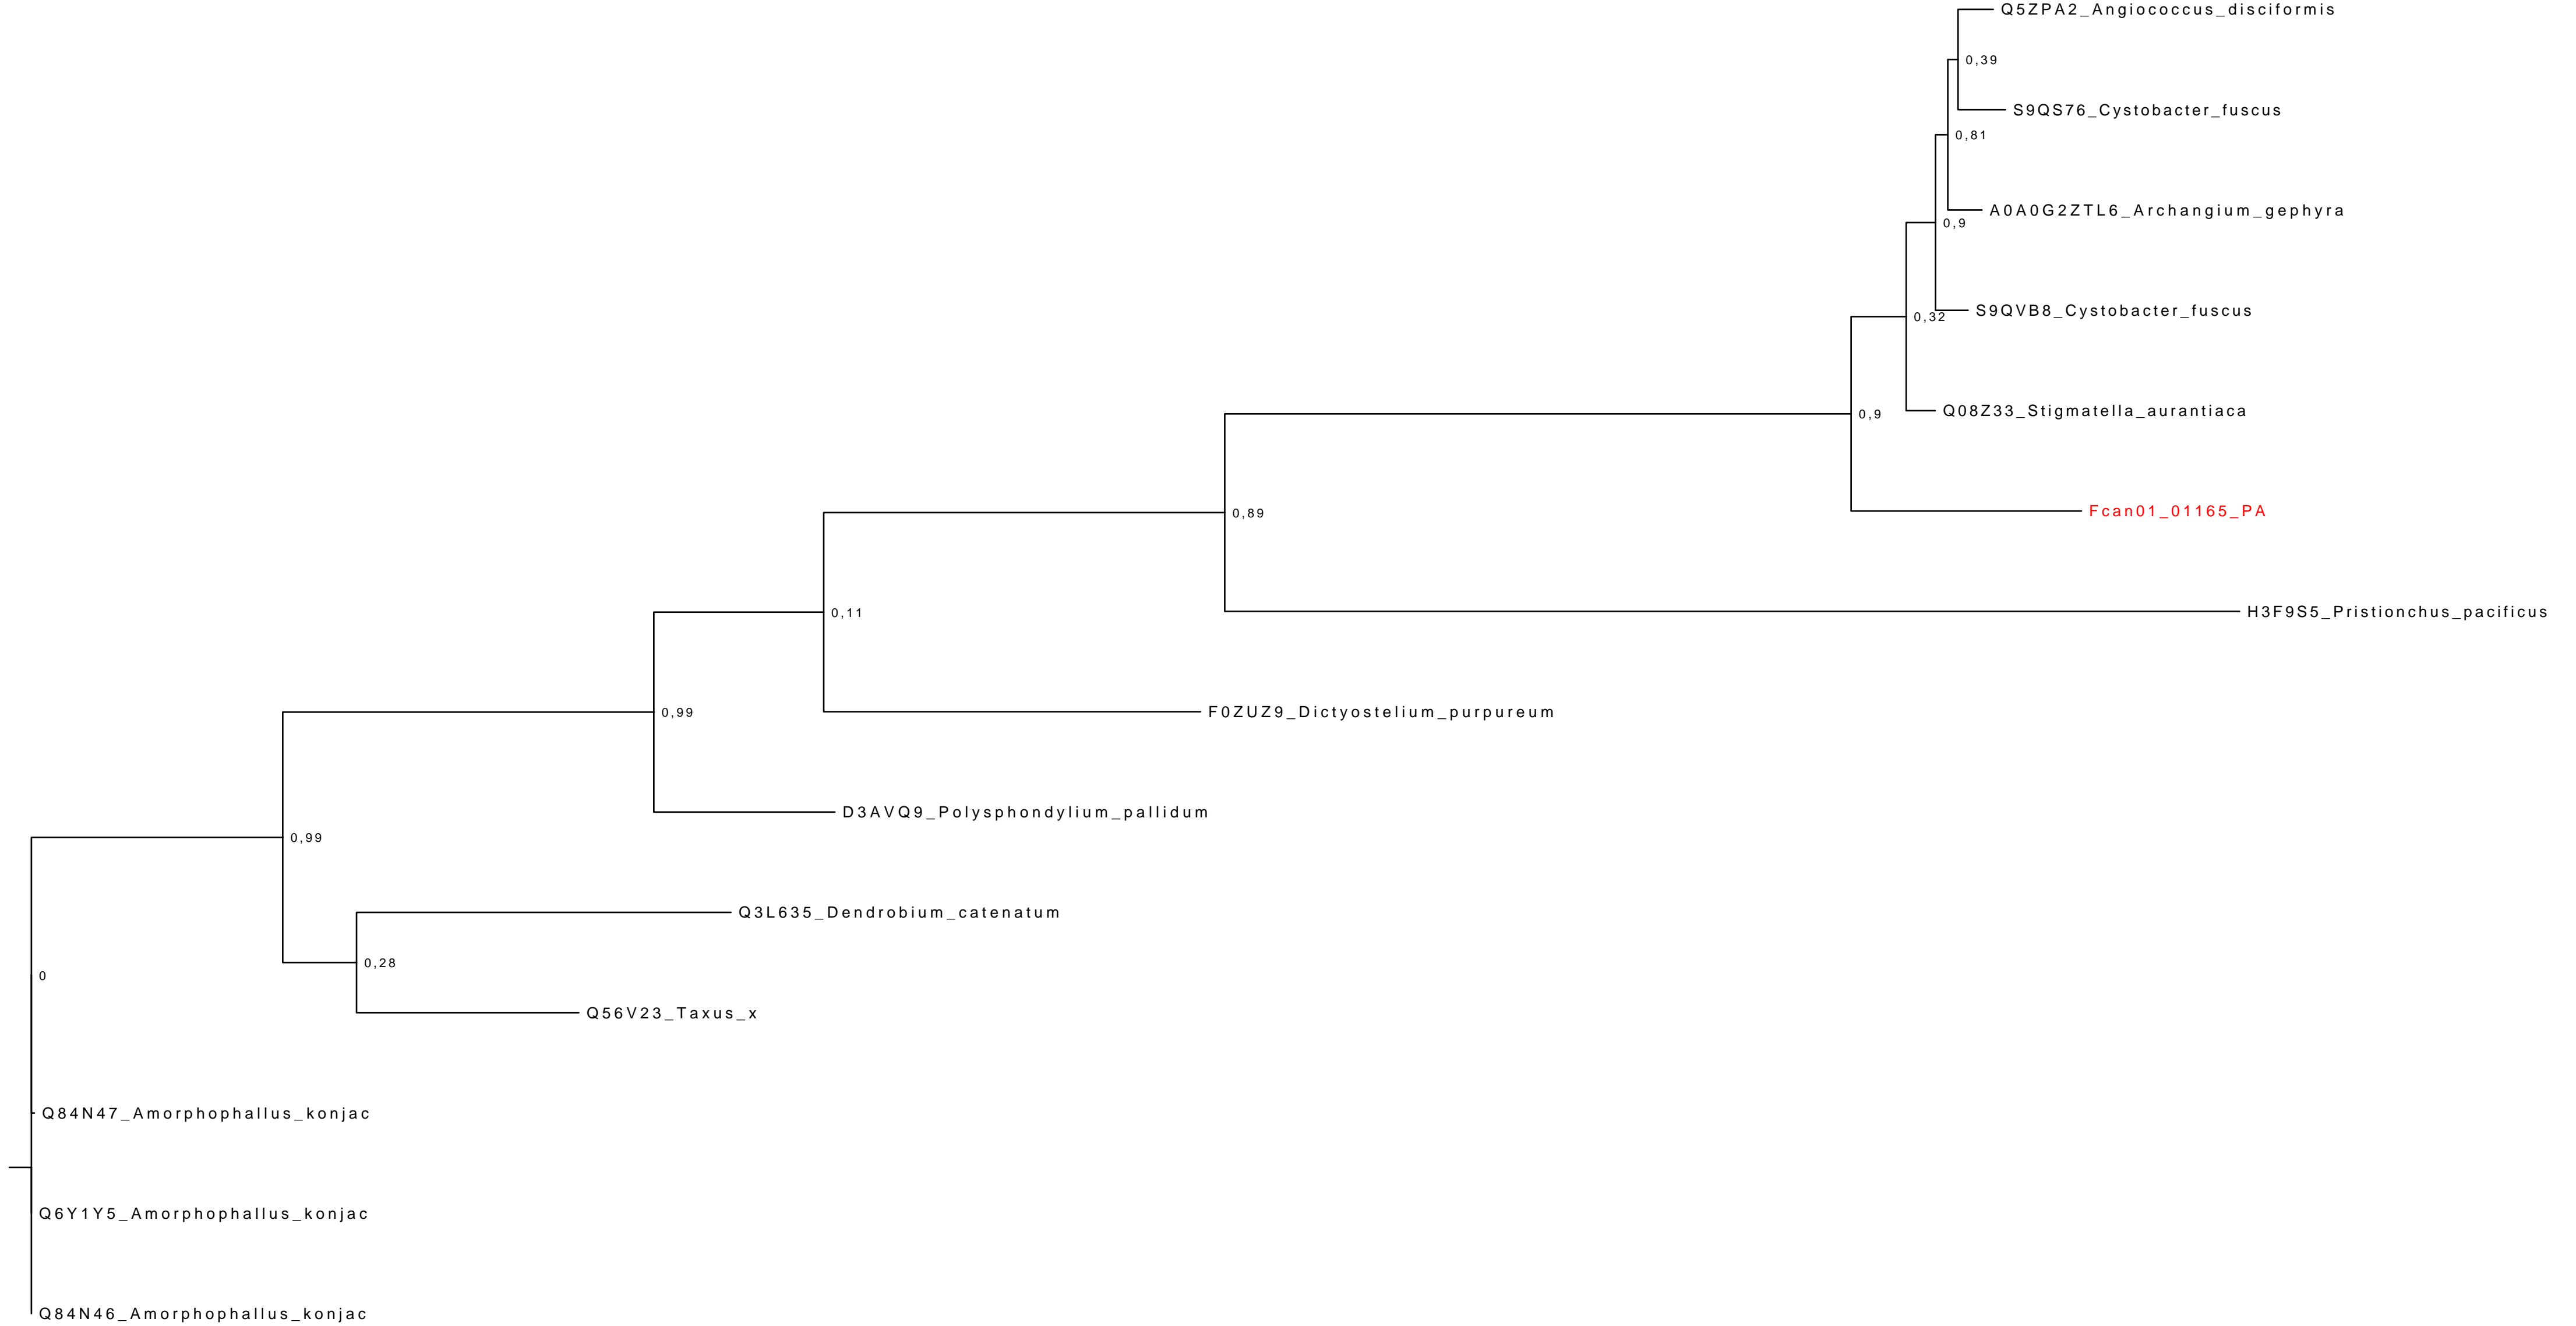

0.6

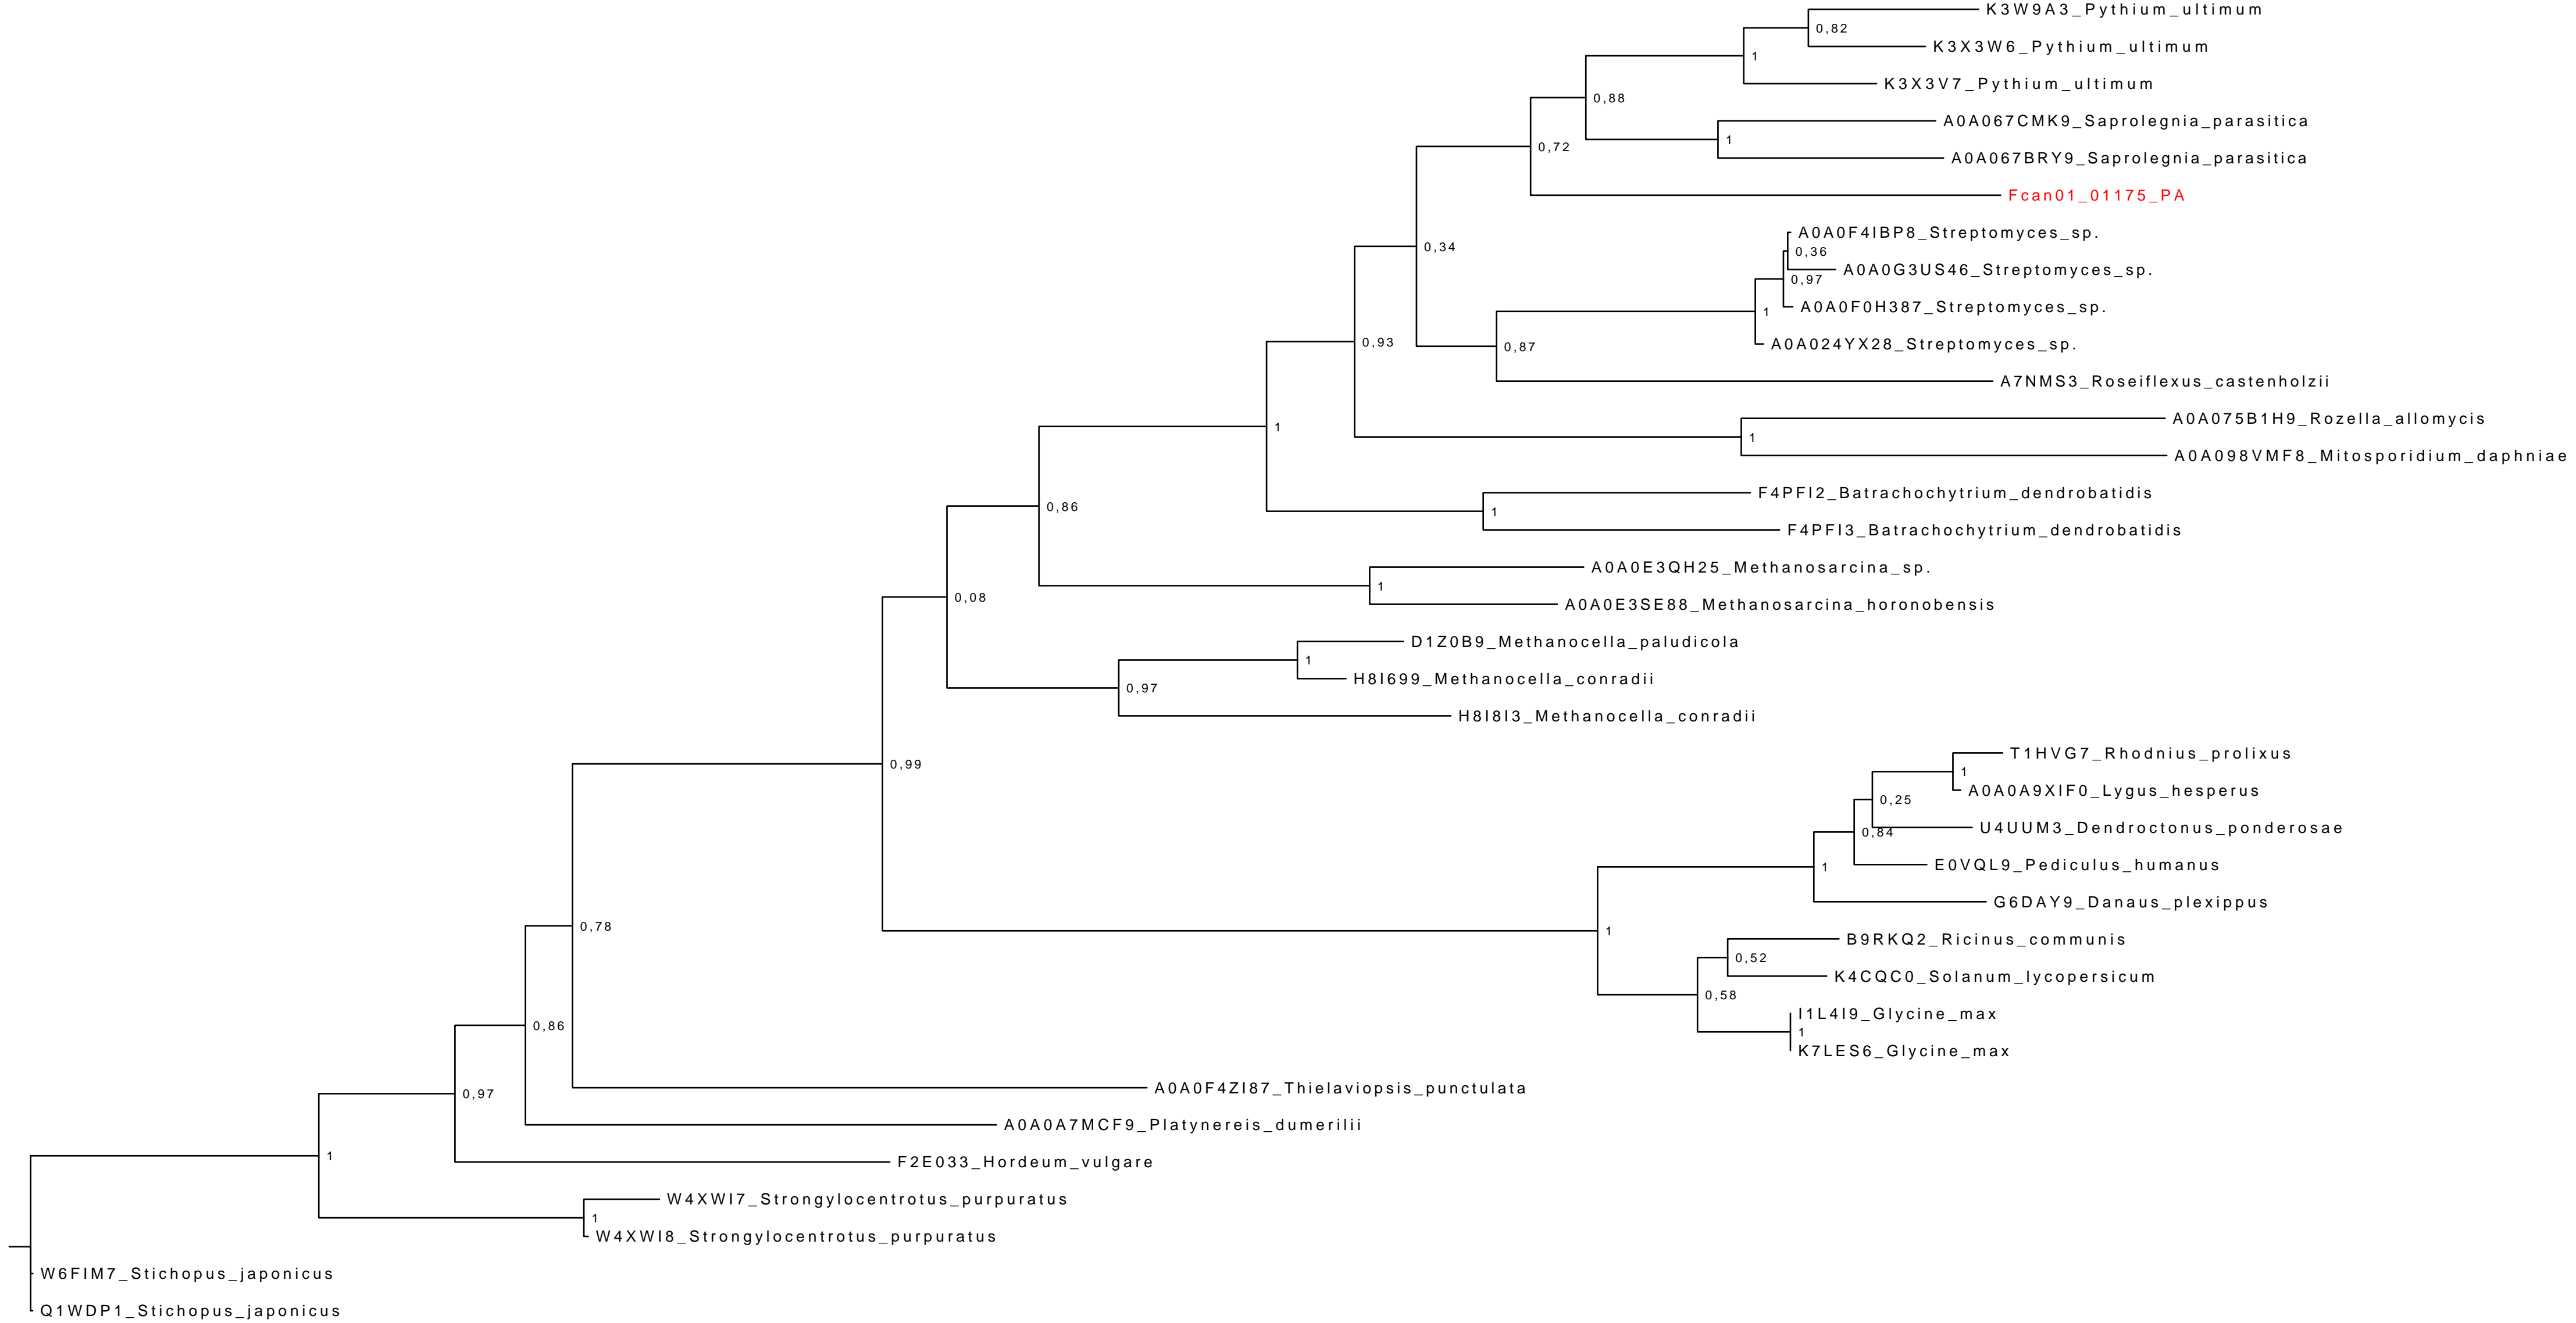

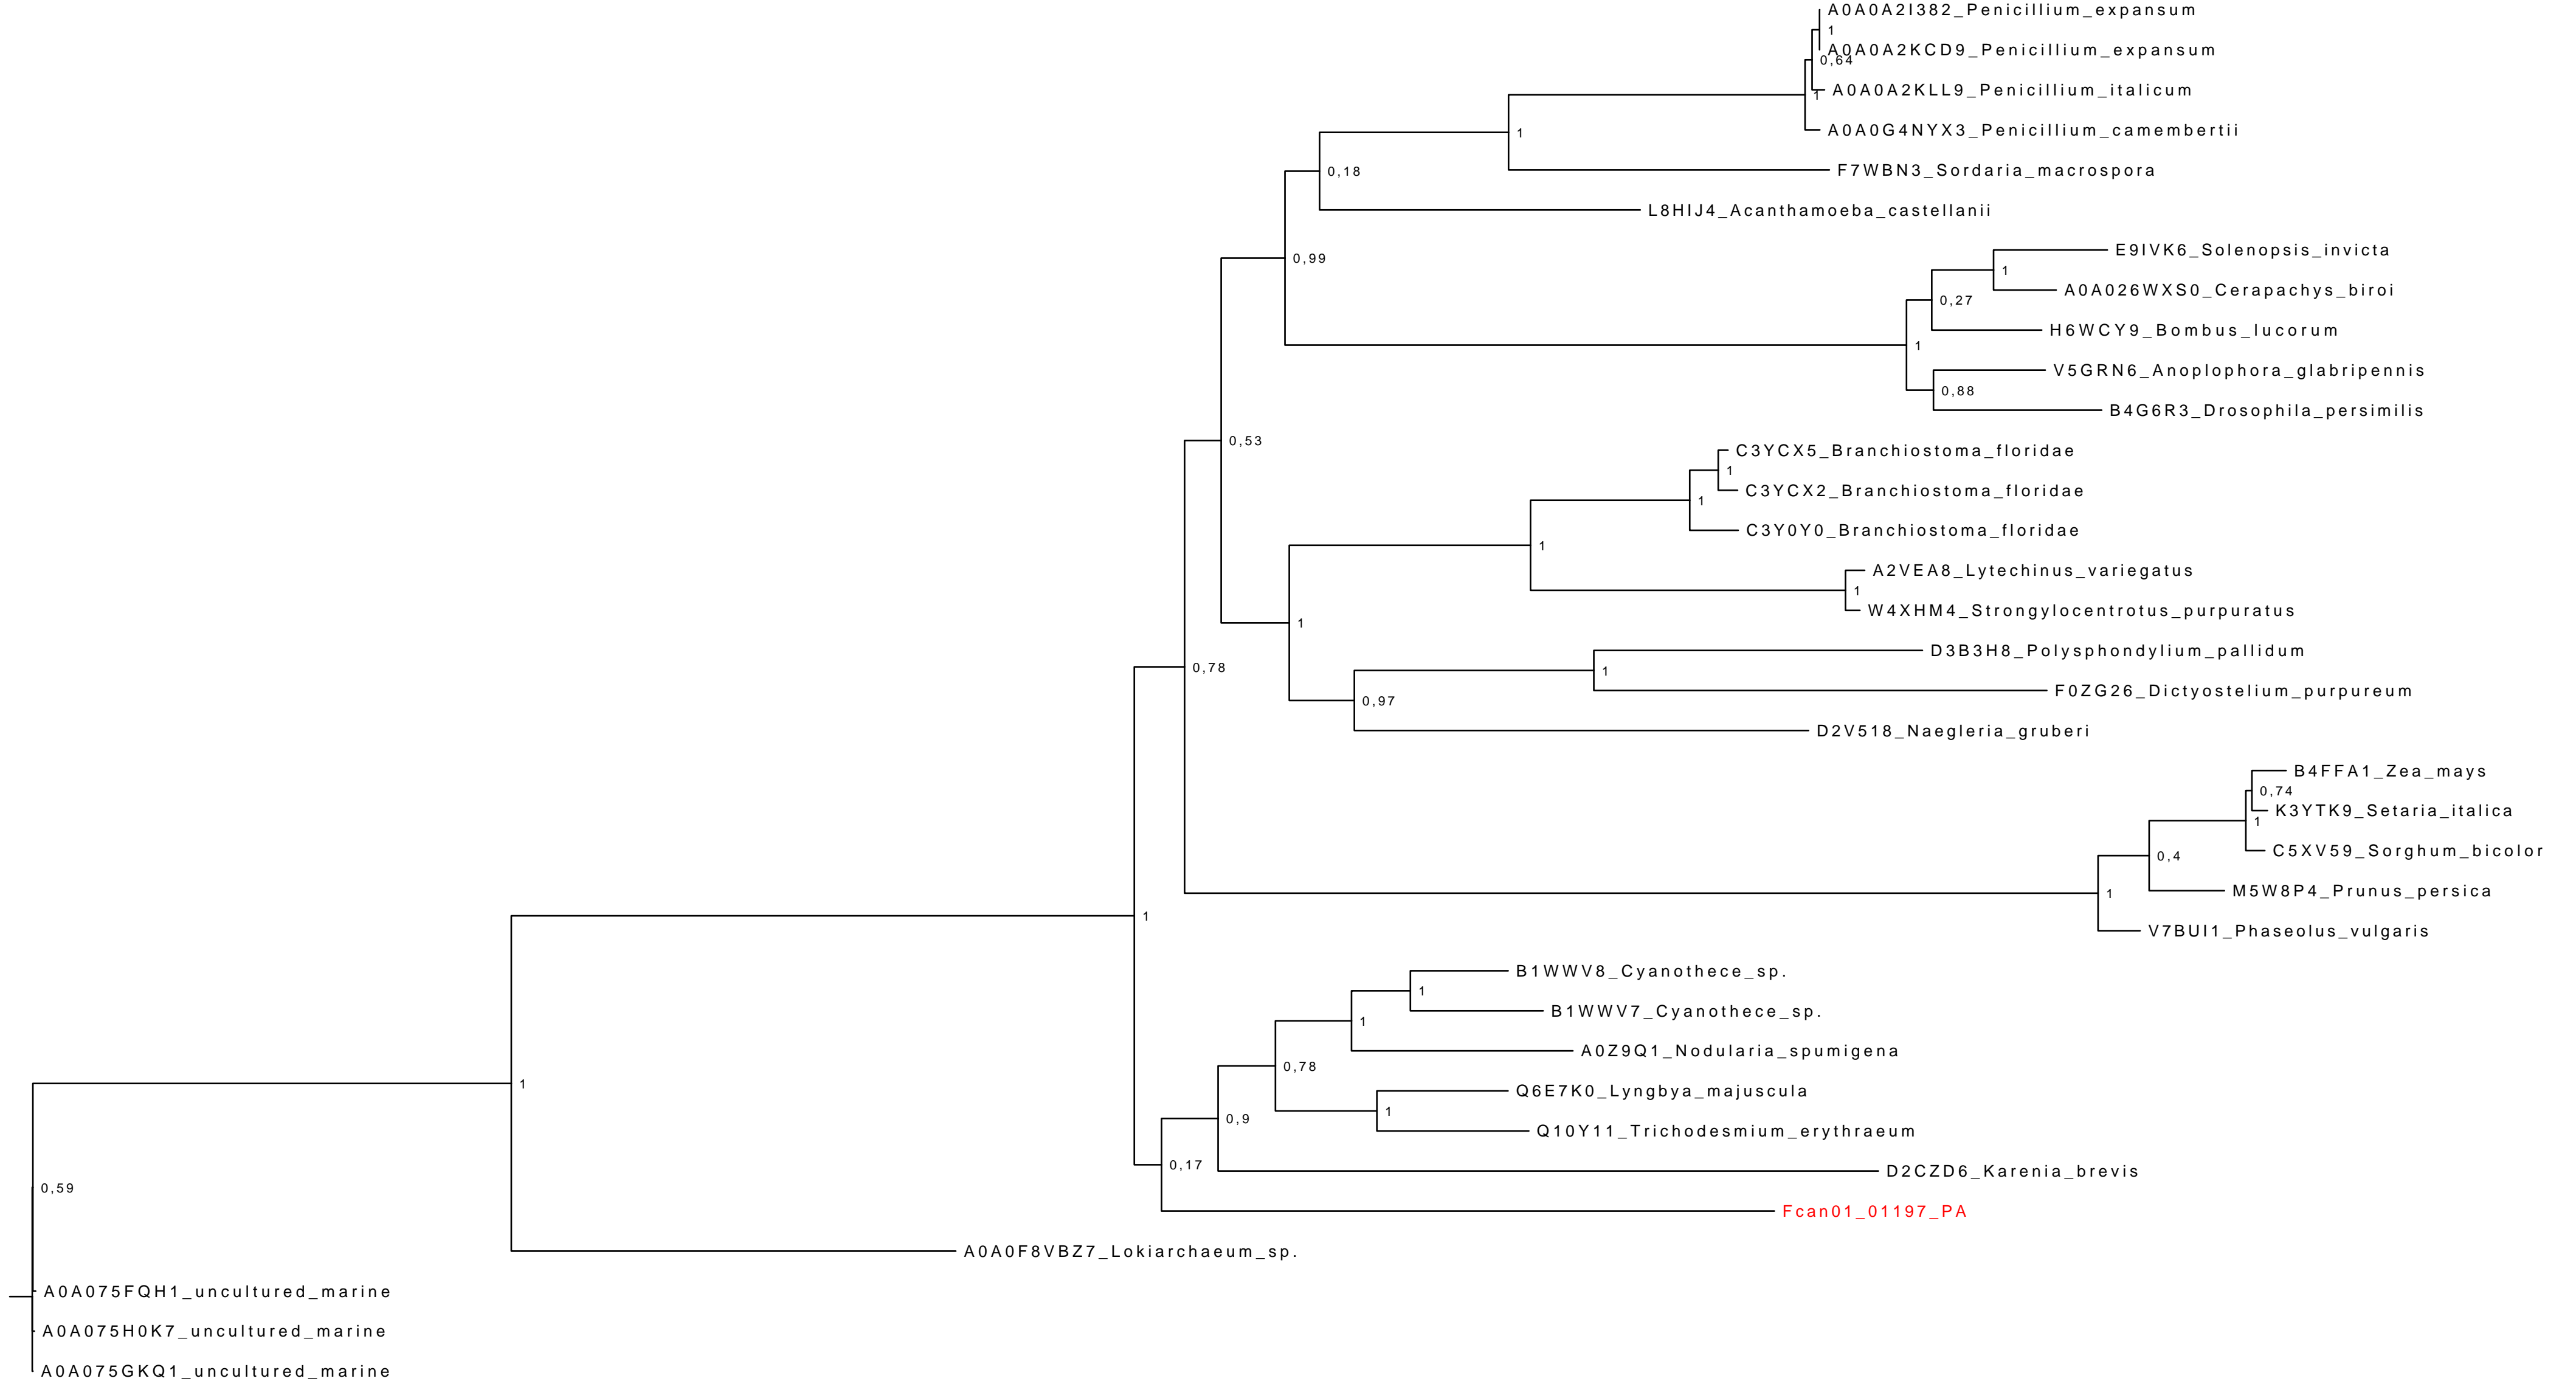

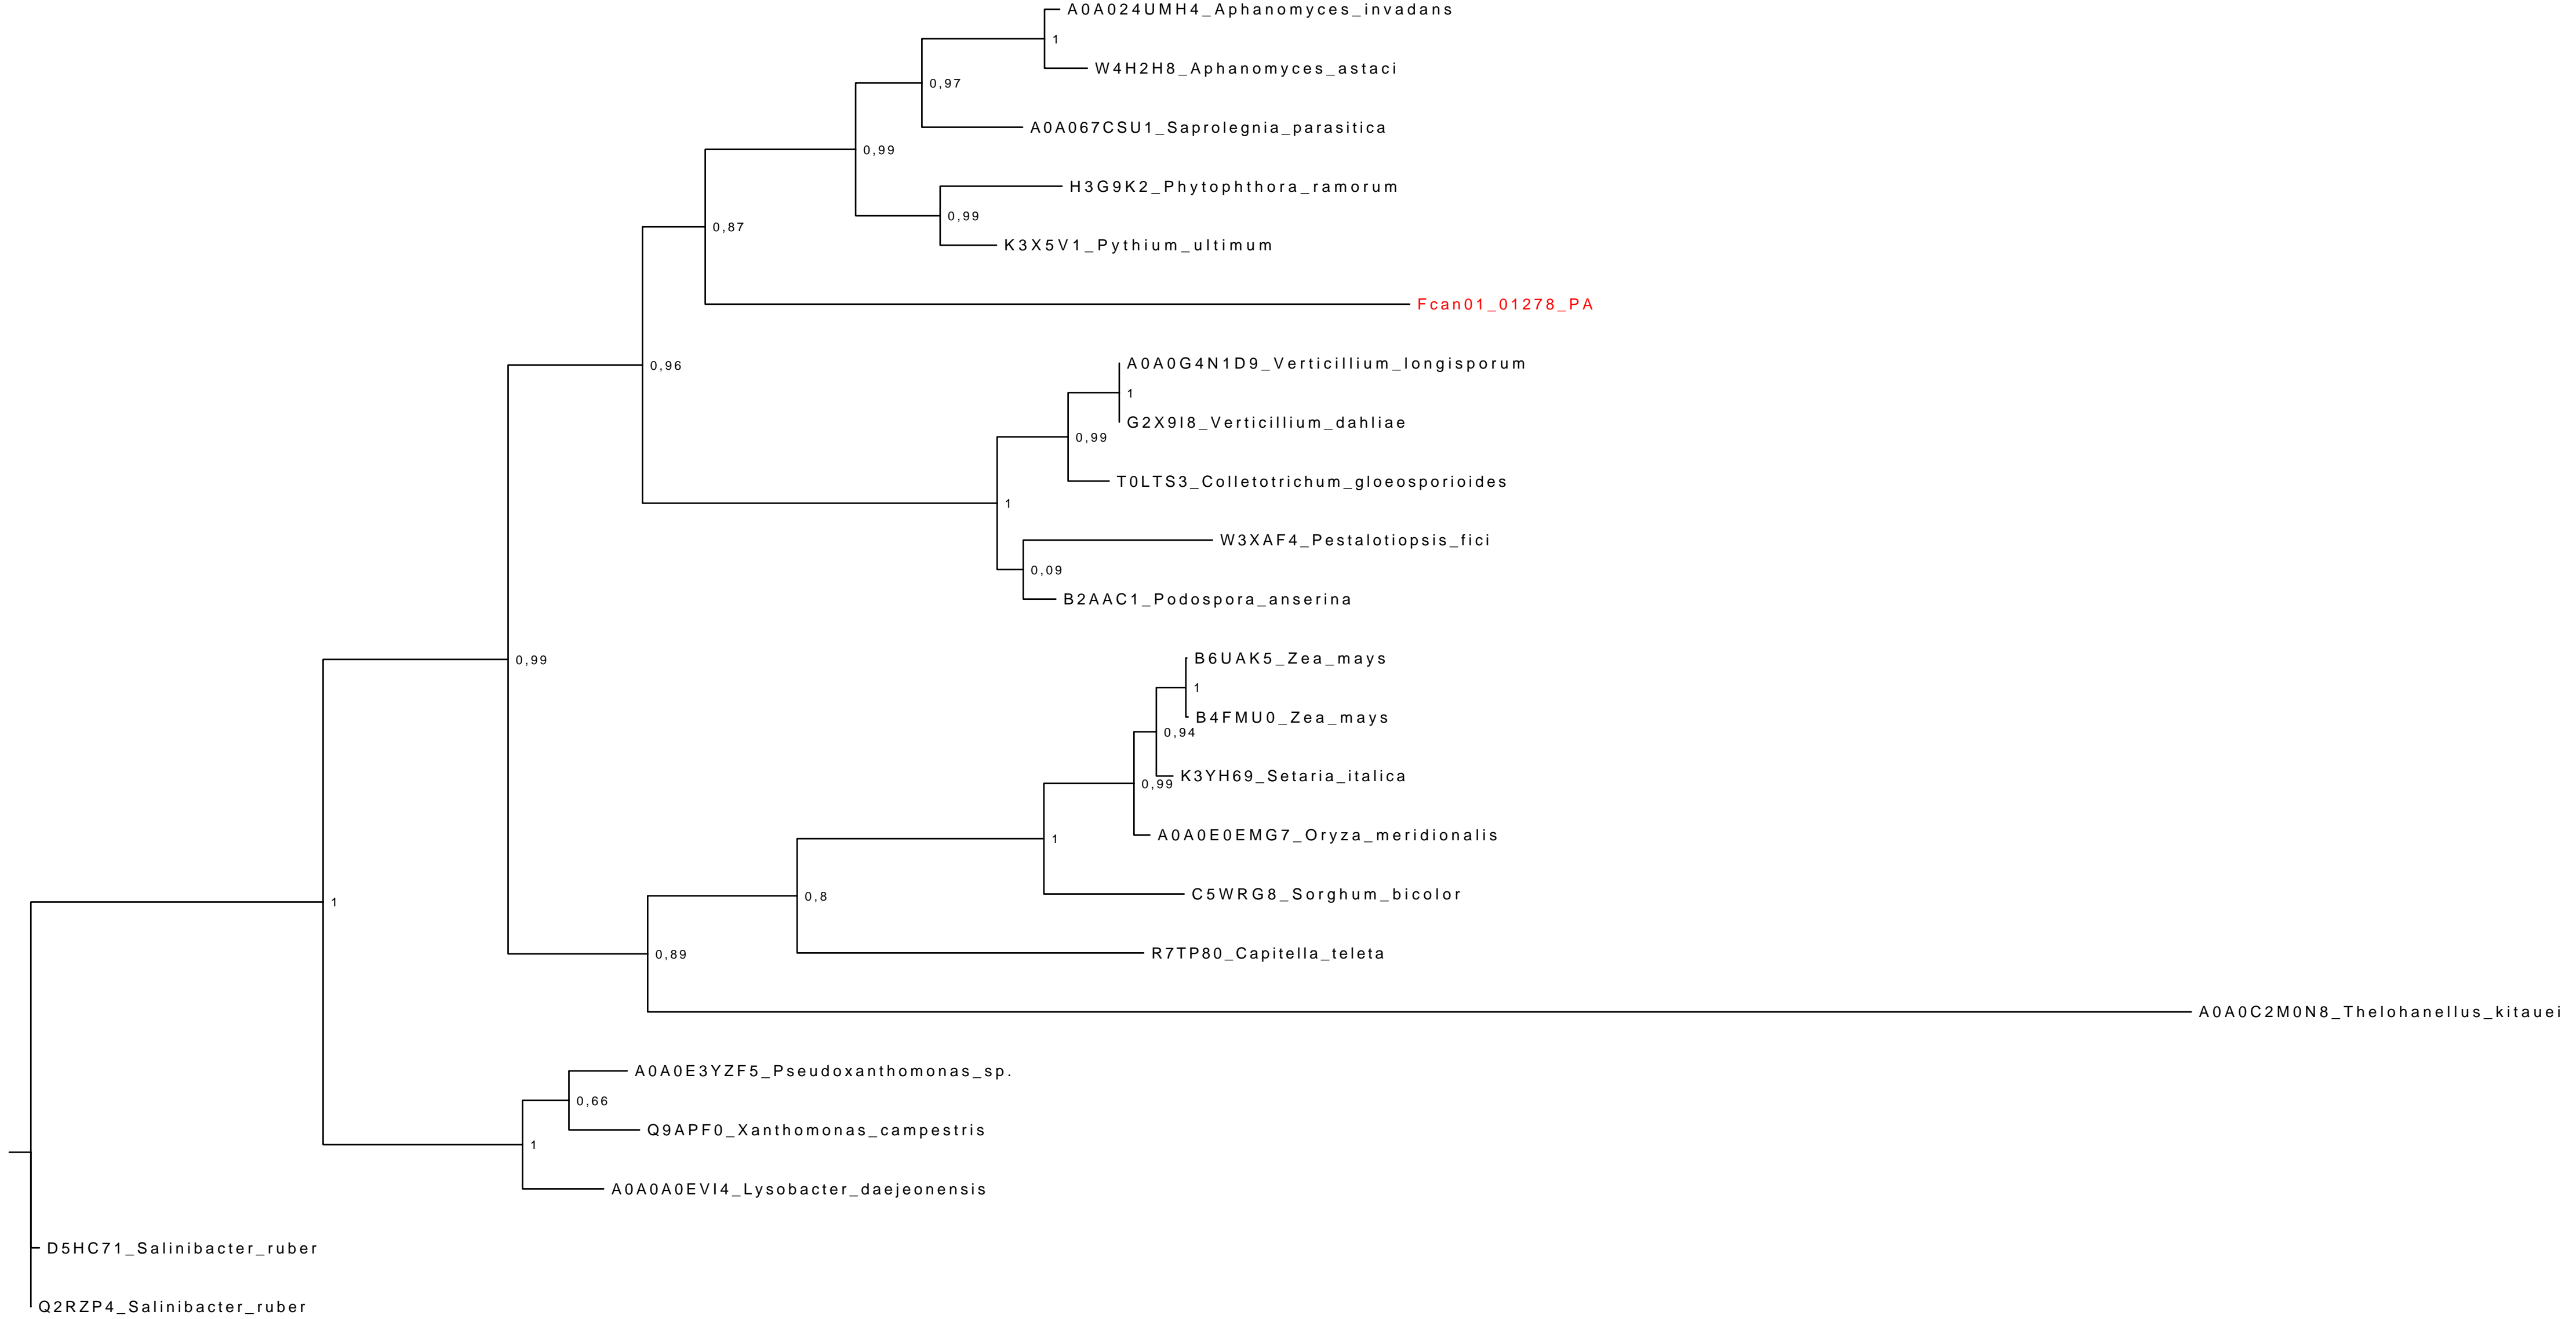



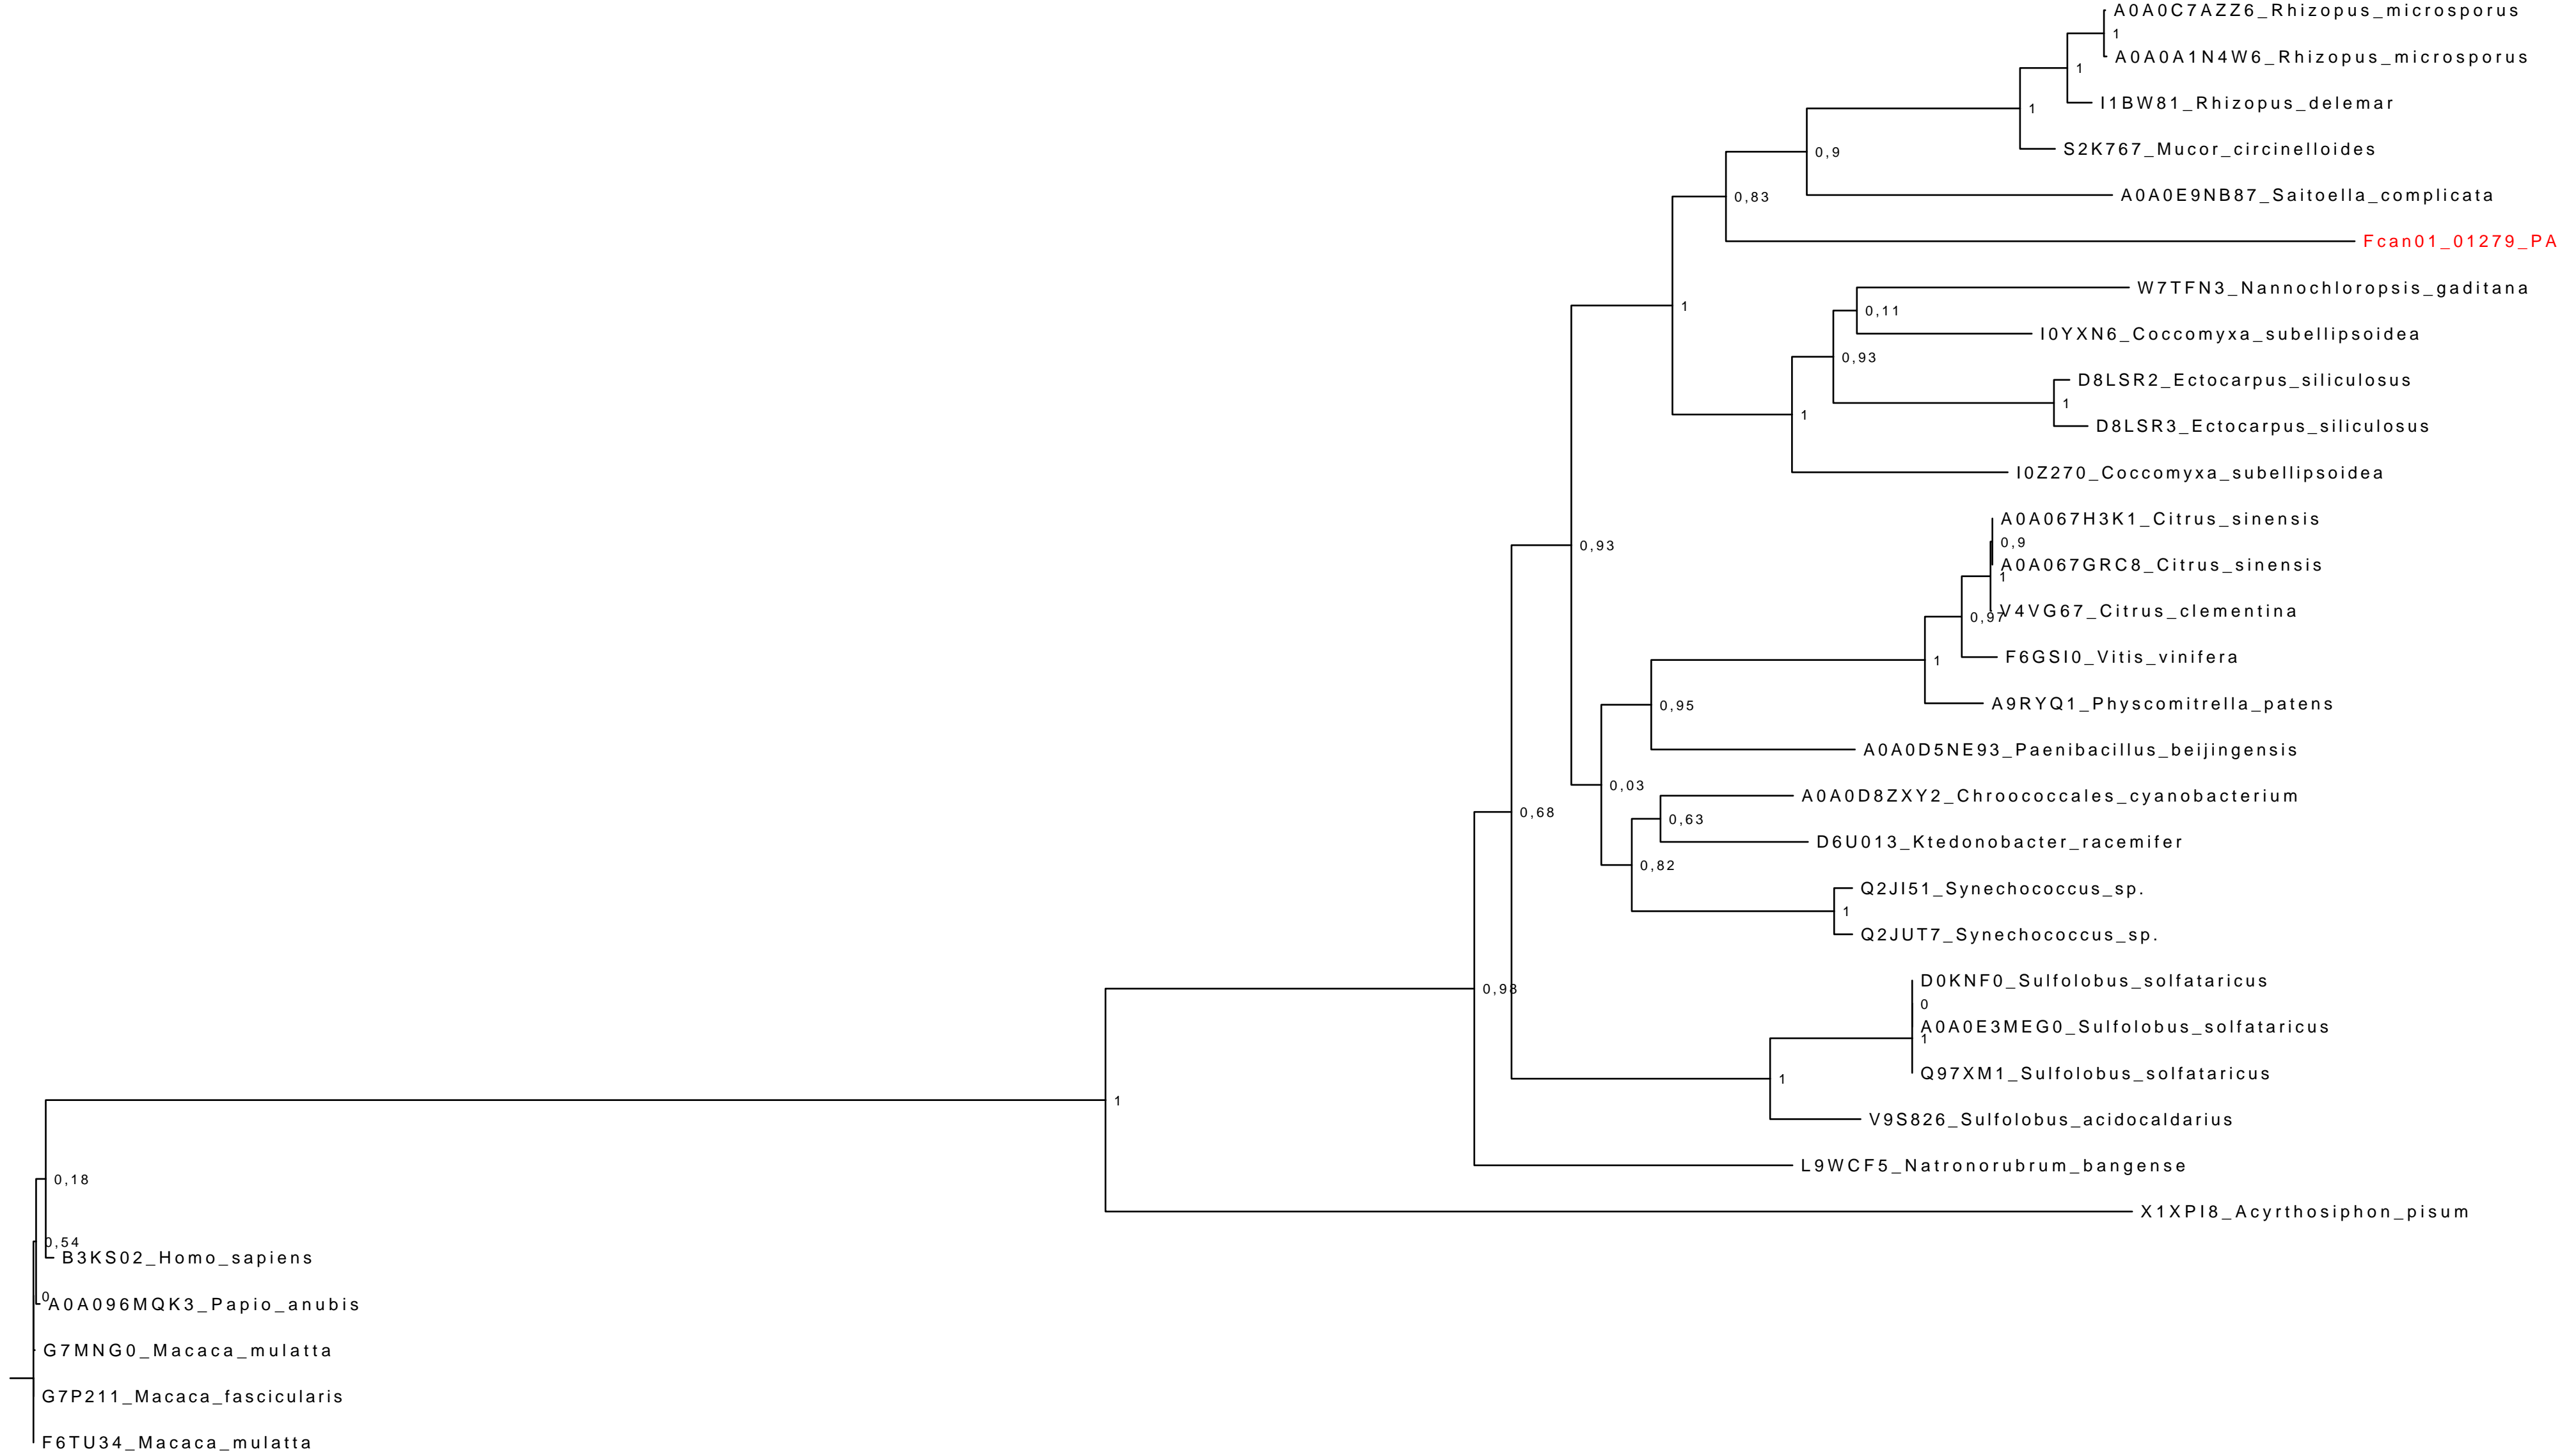



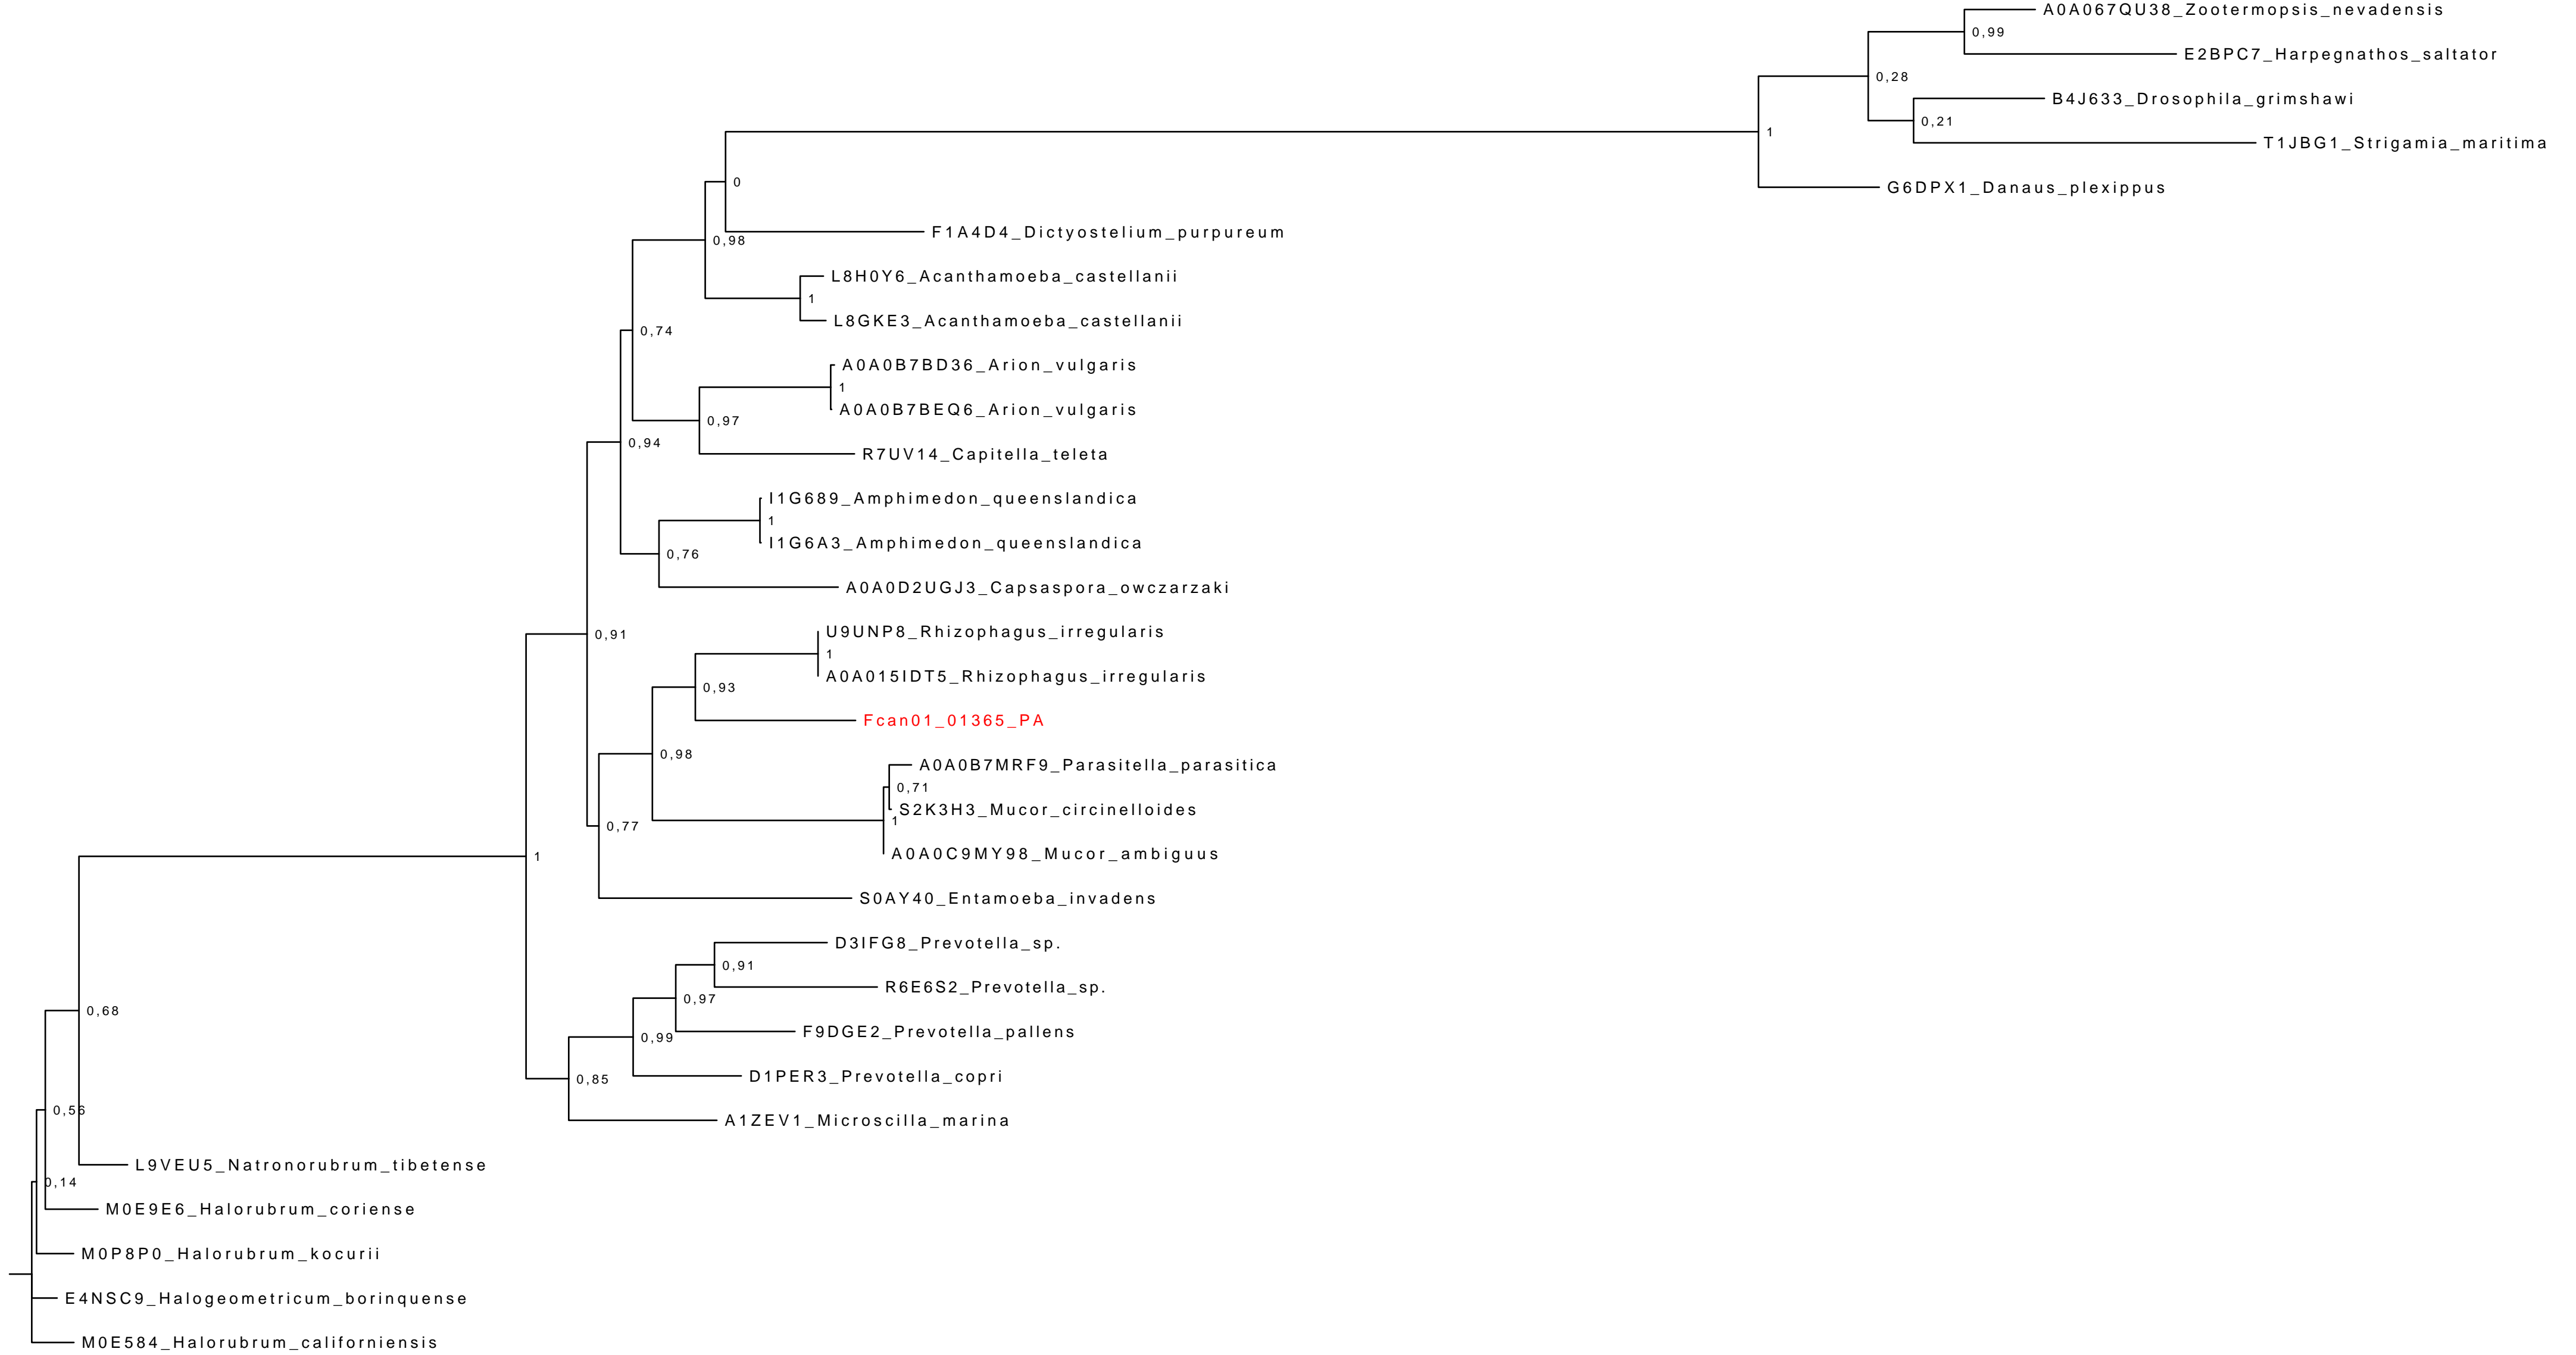

0.9

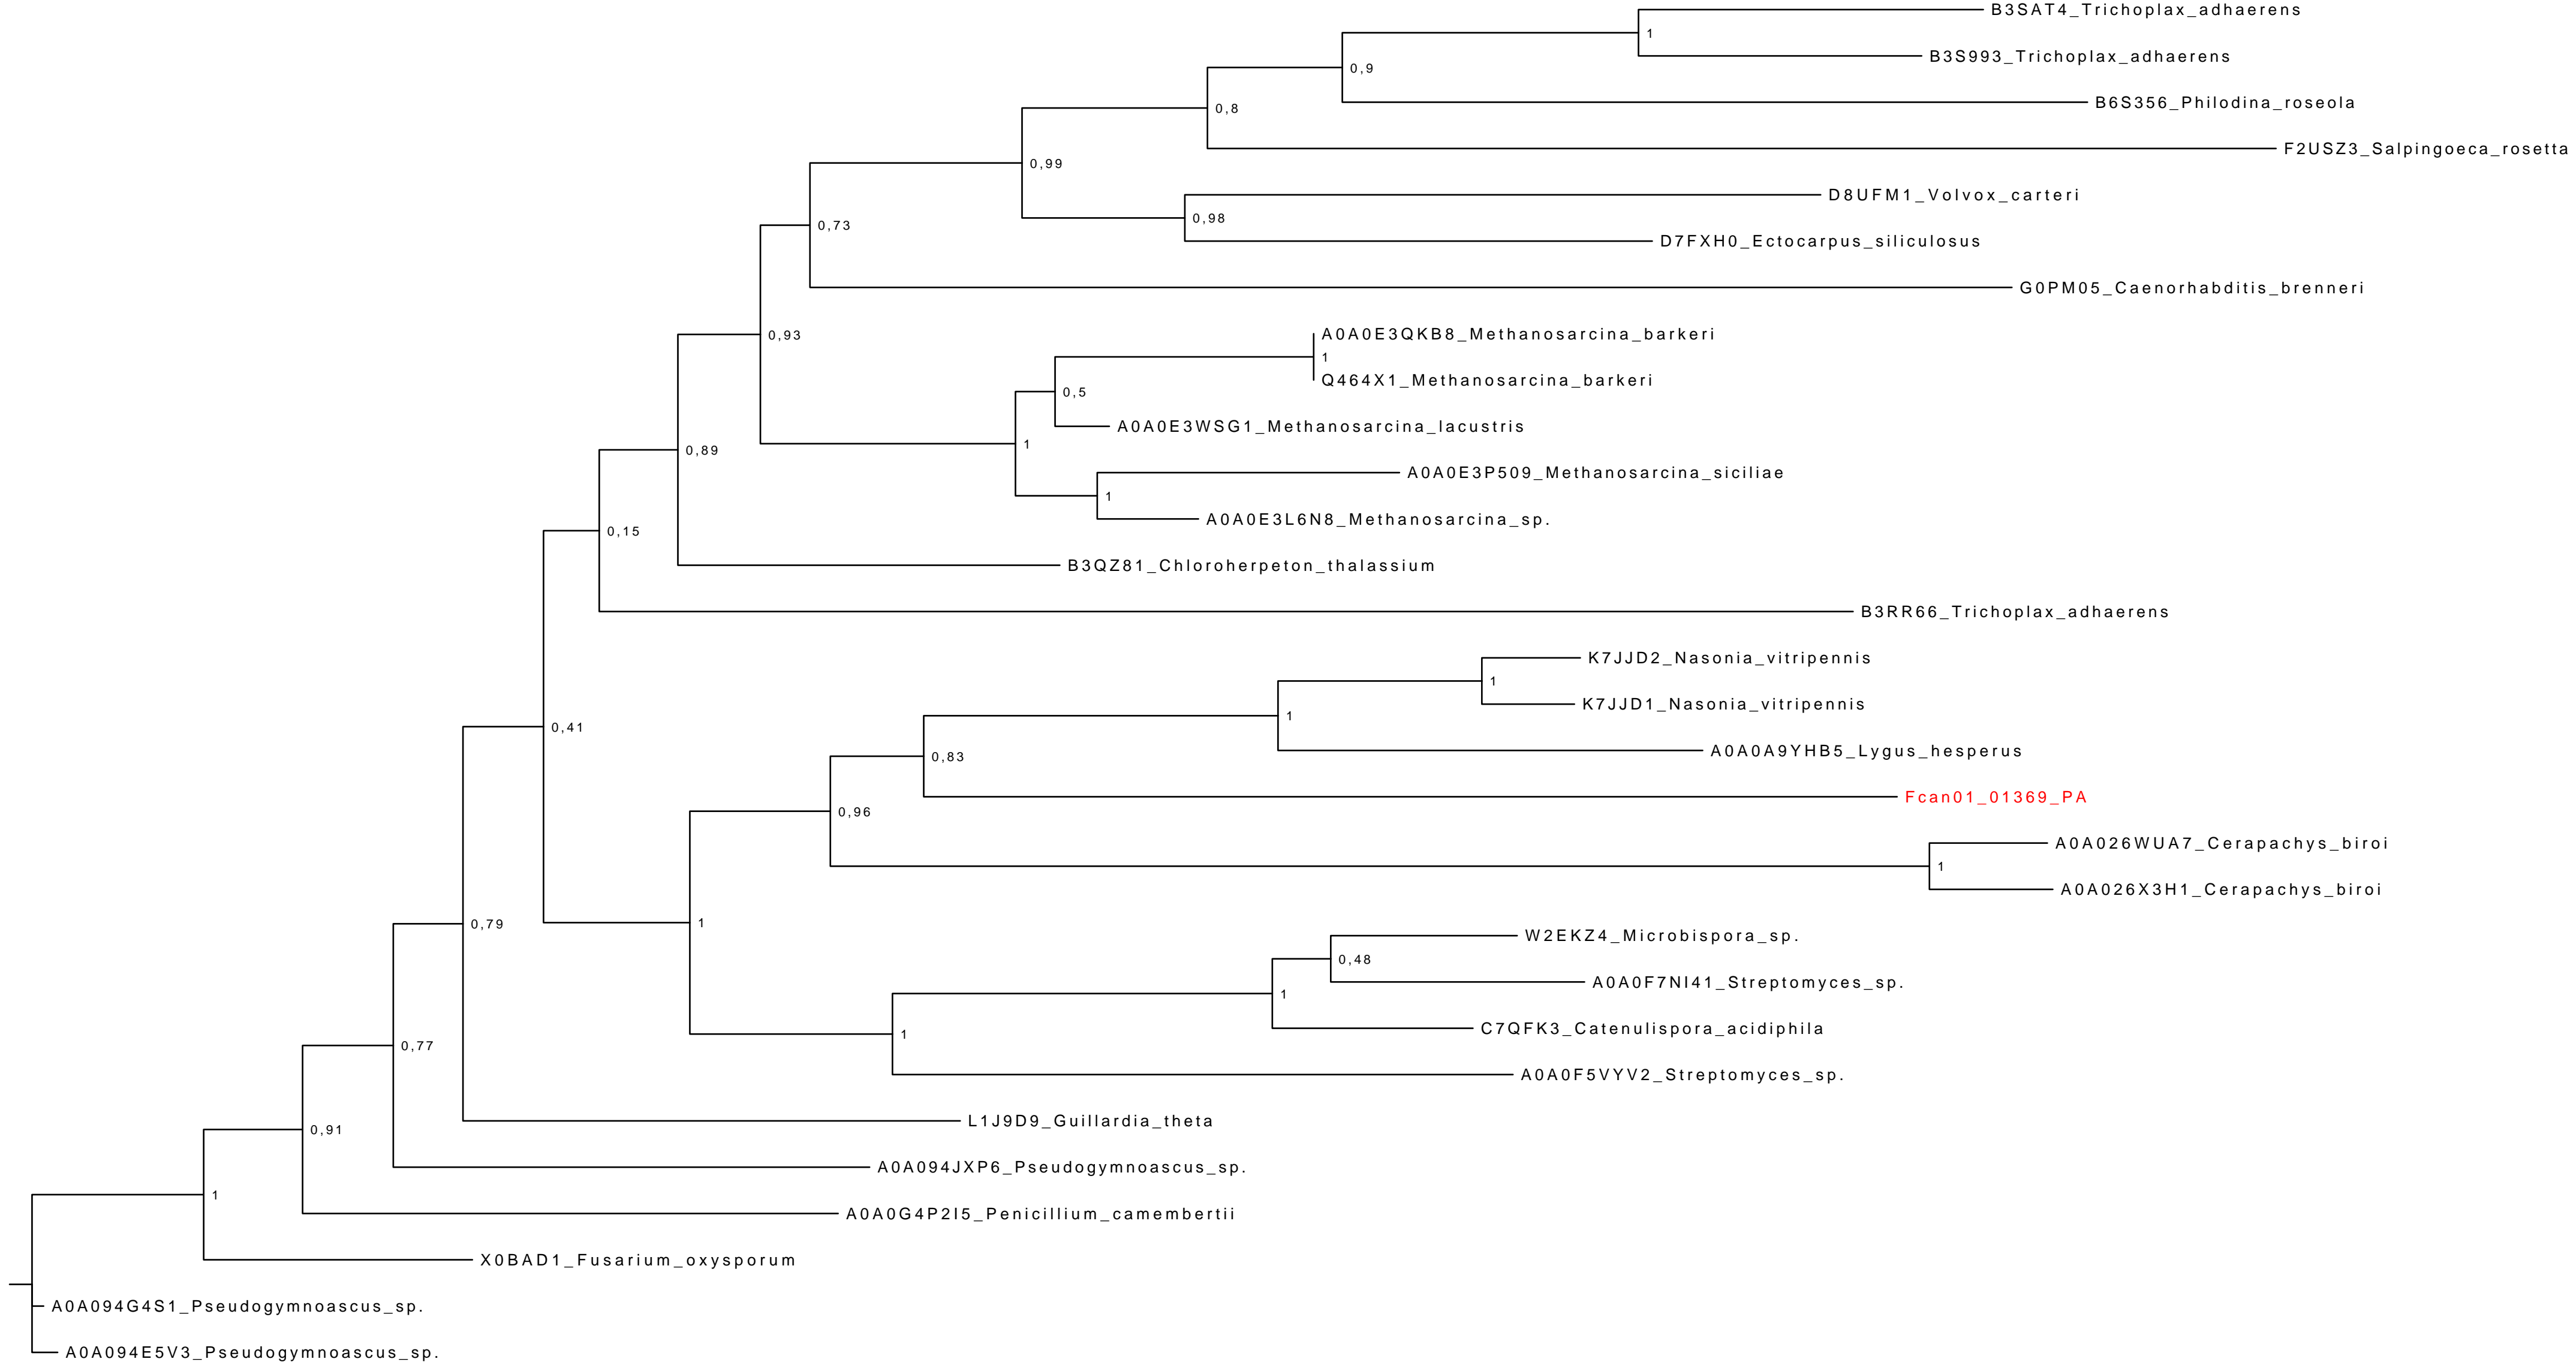

0.5

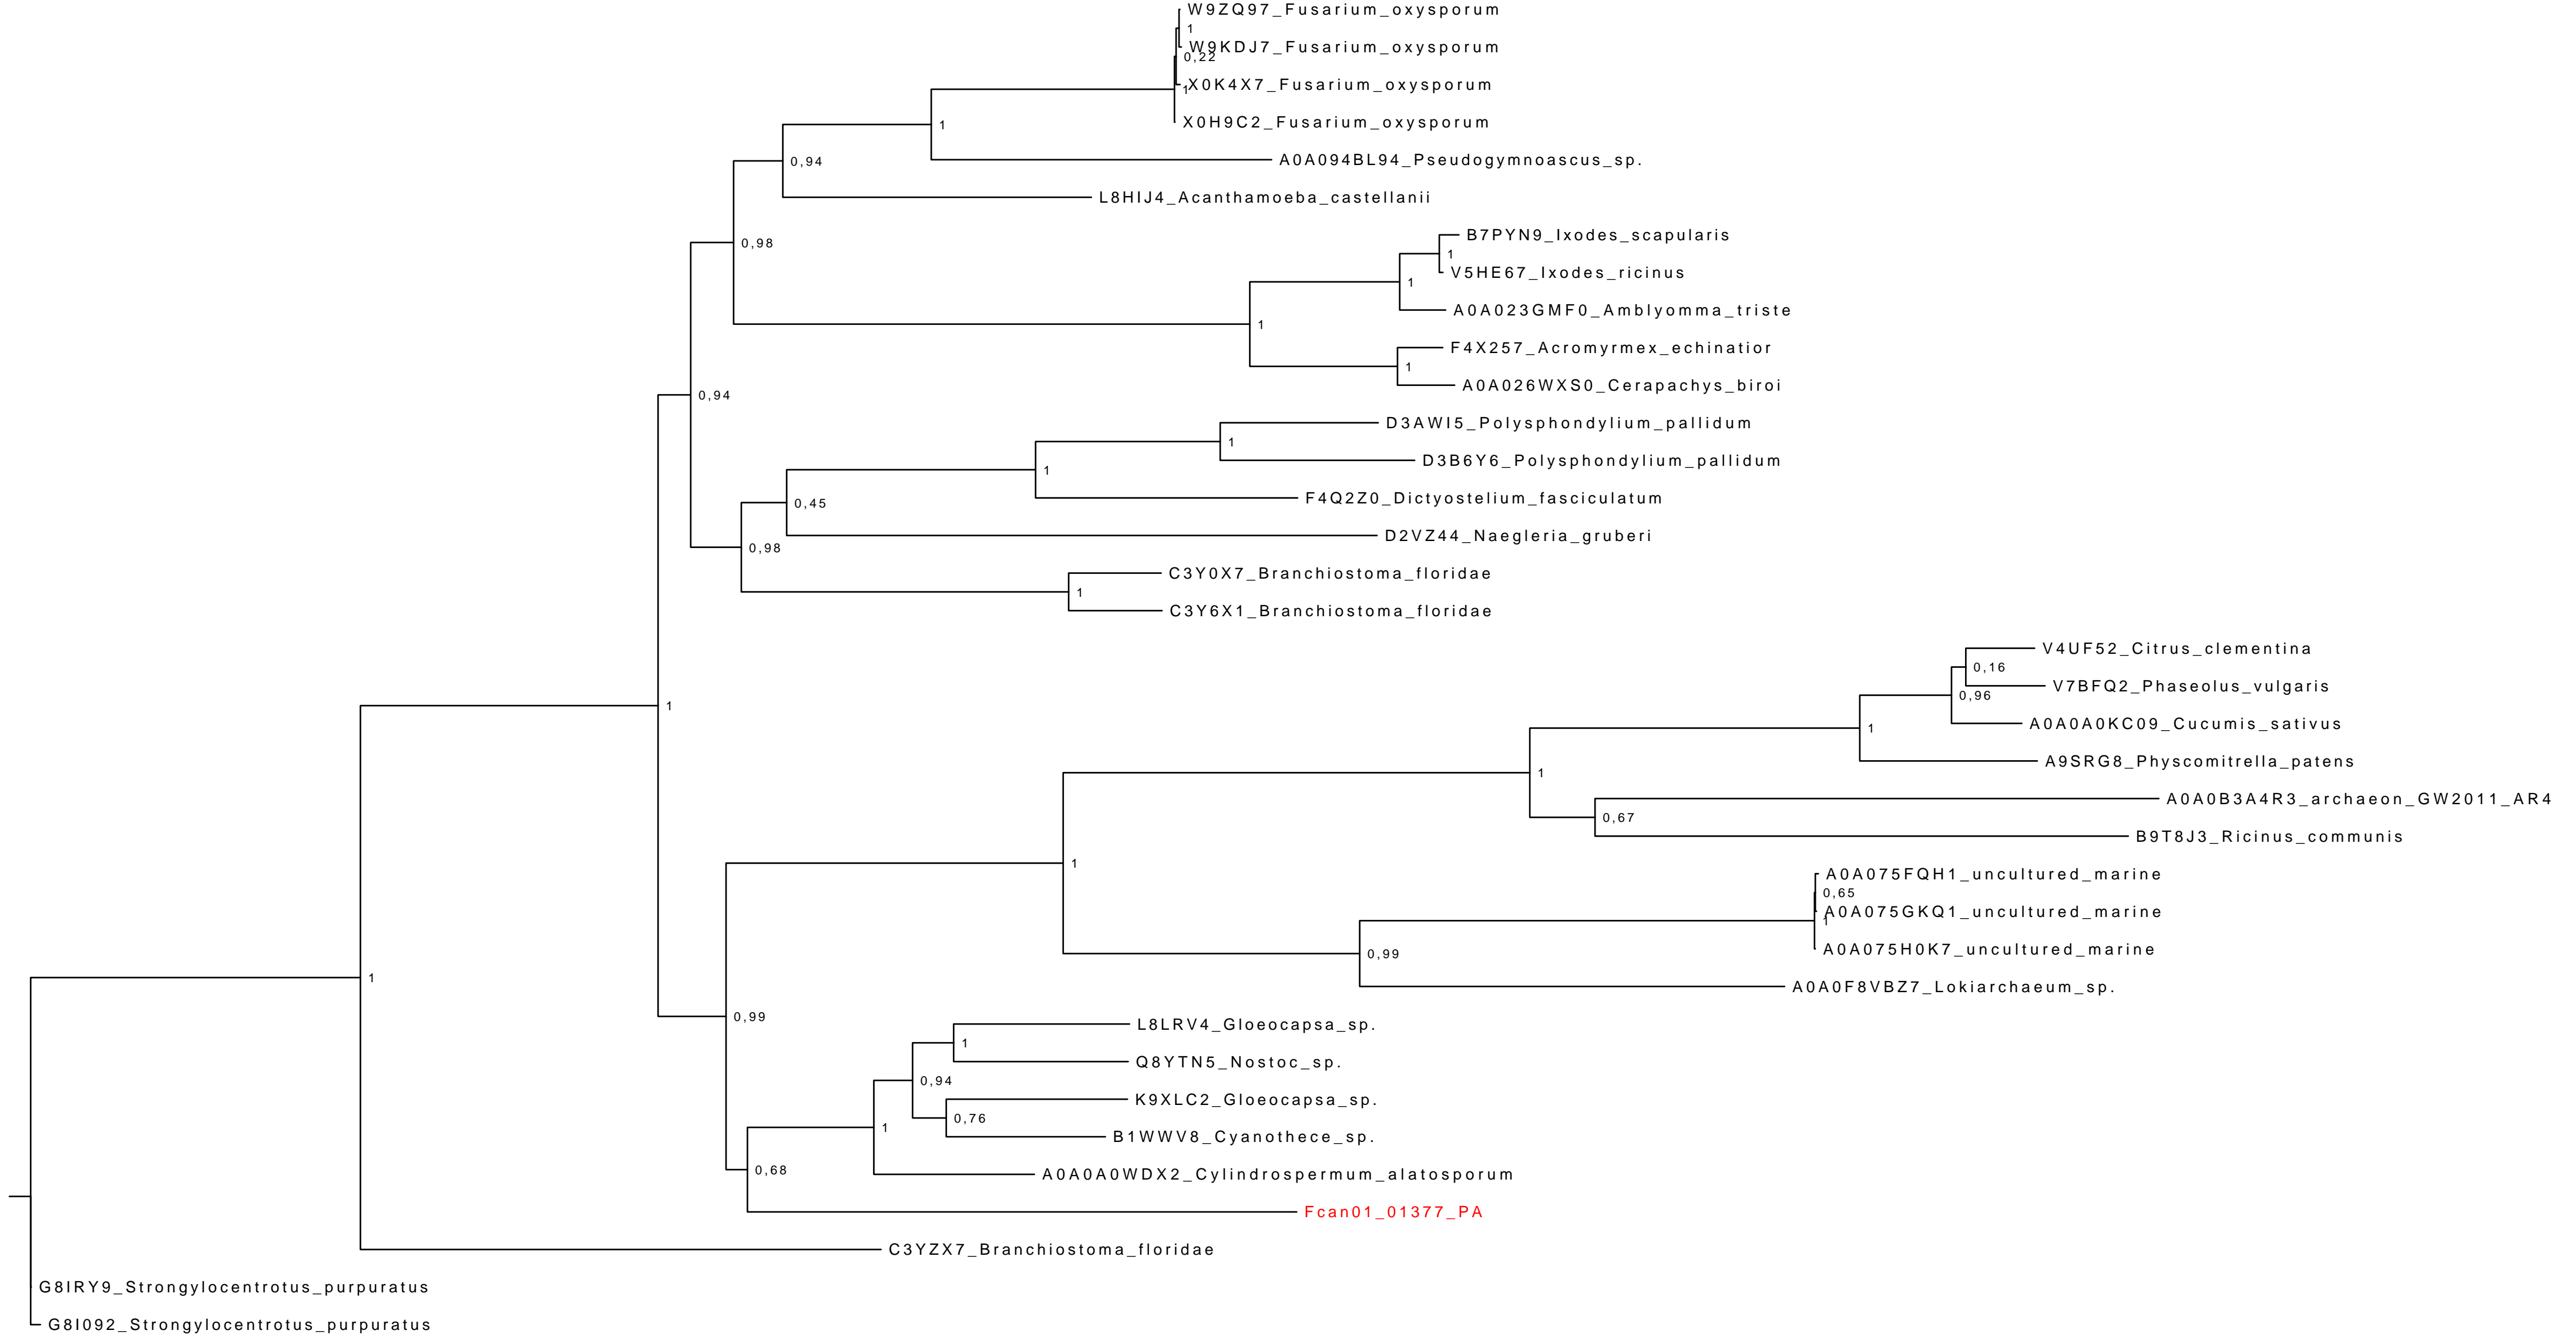

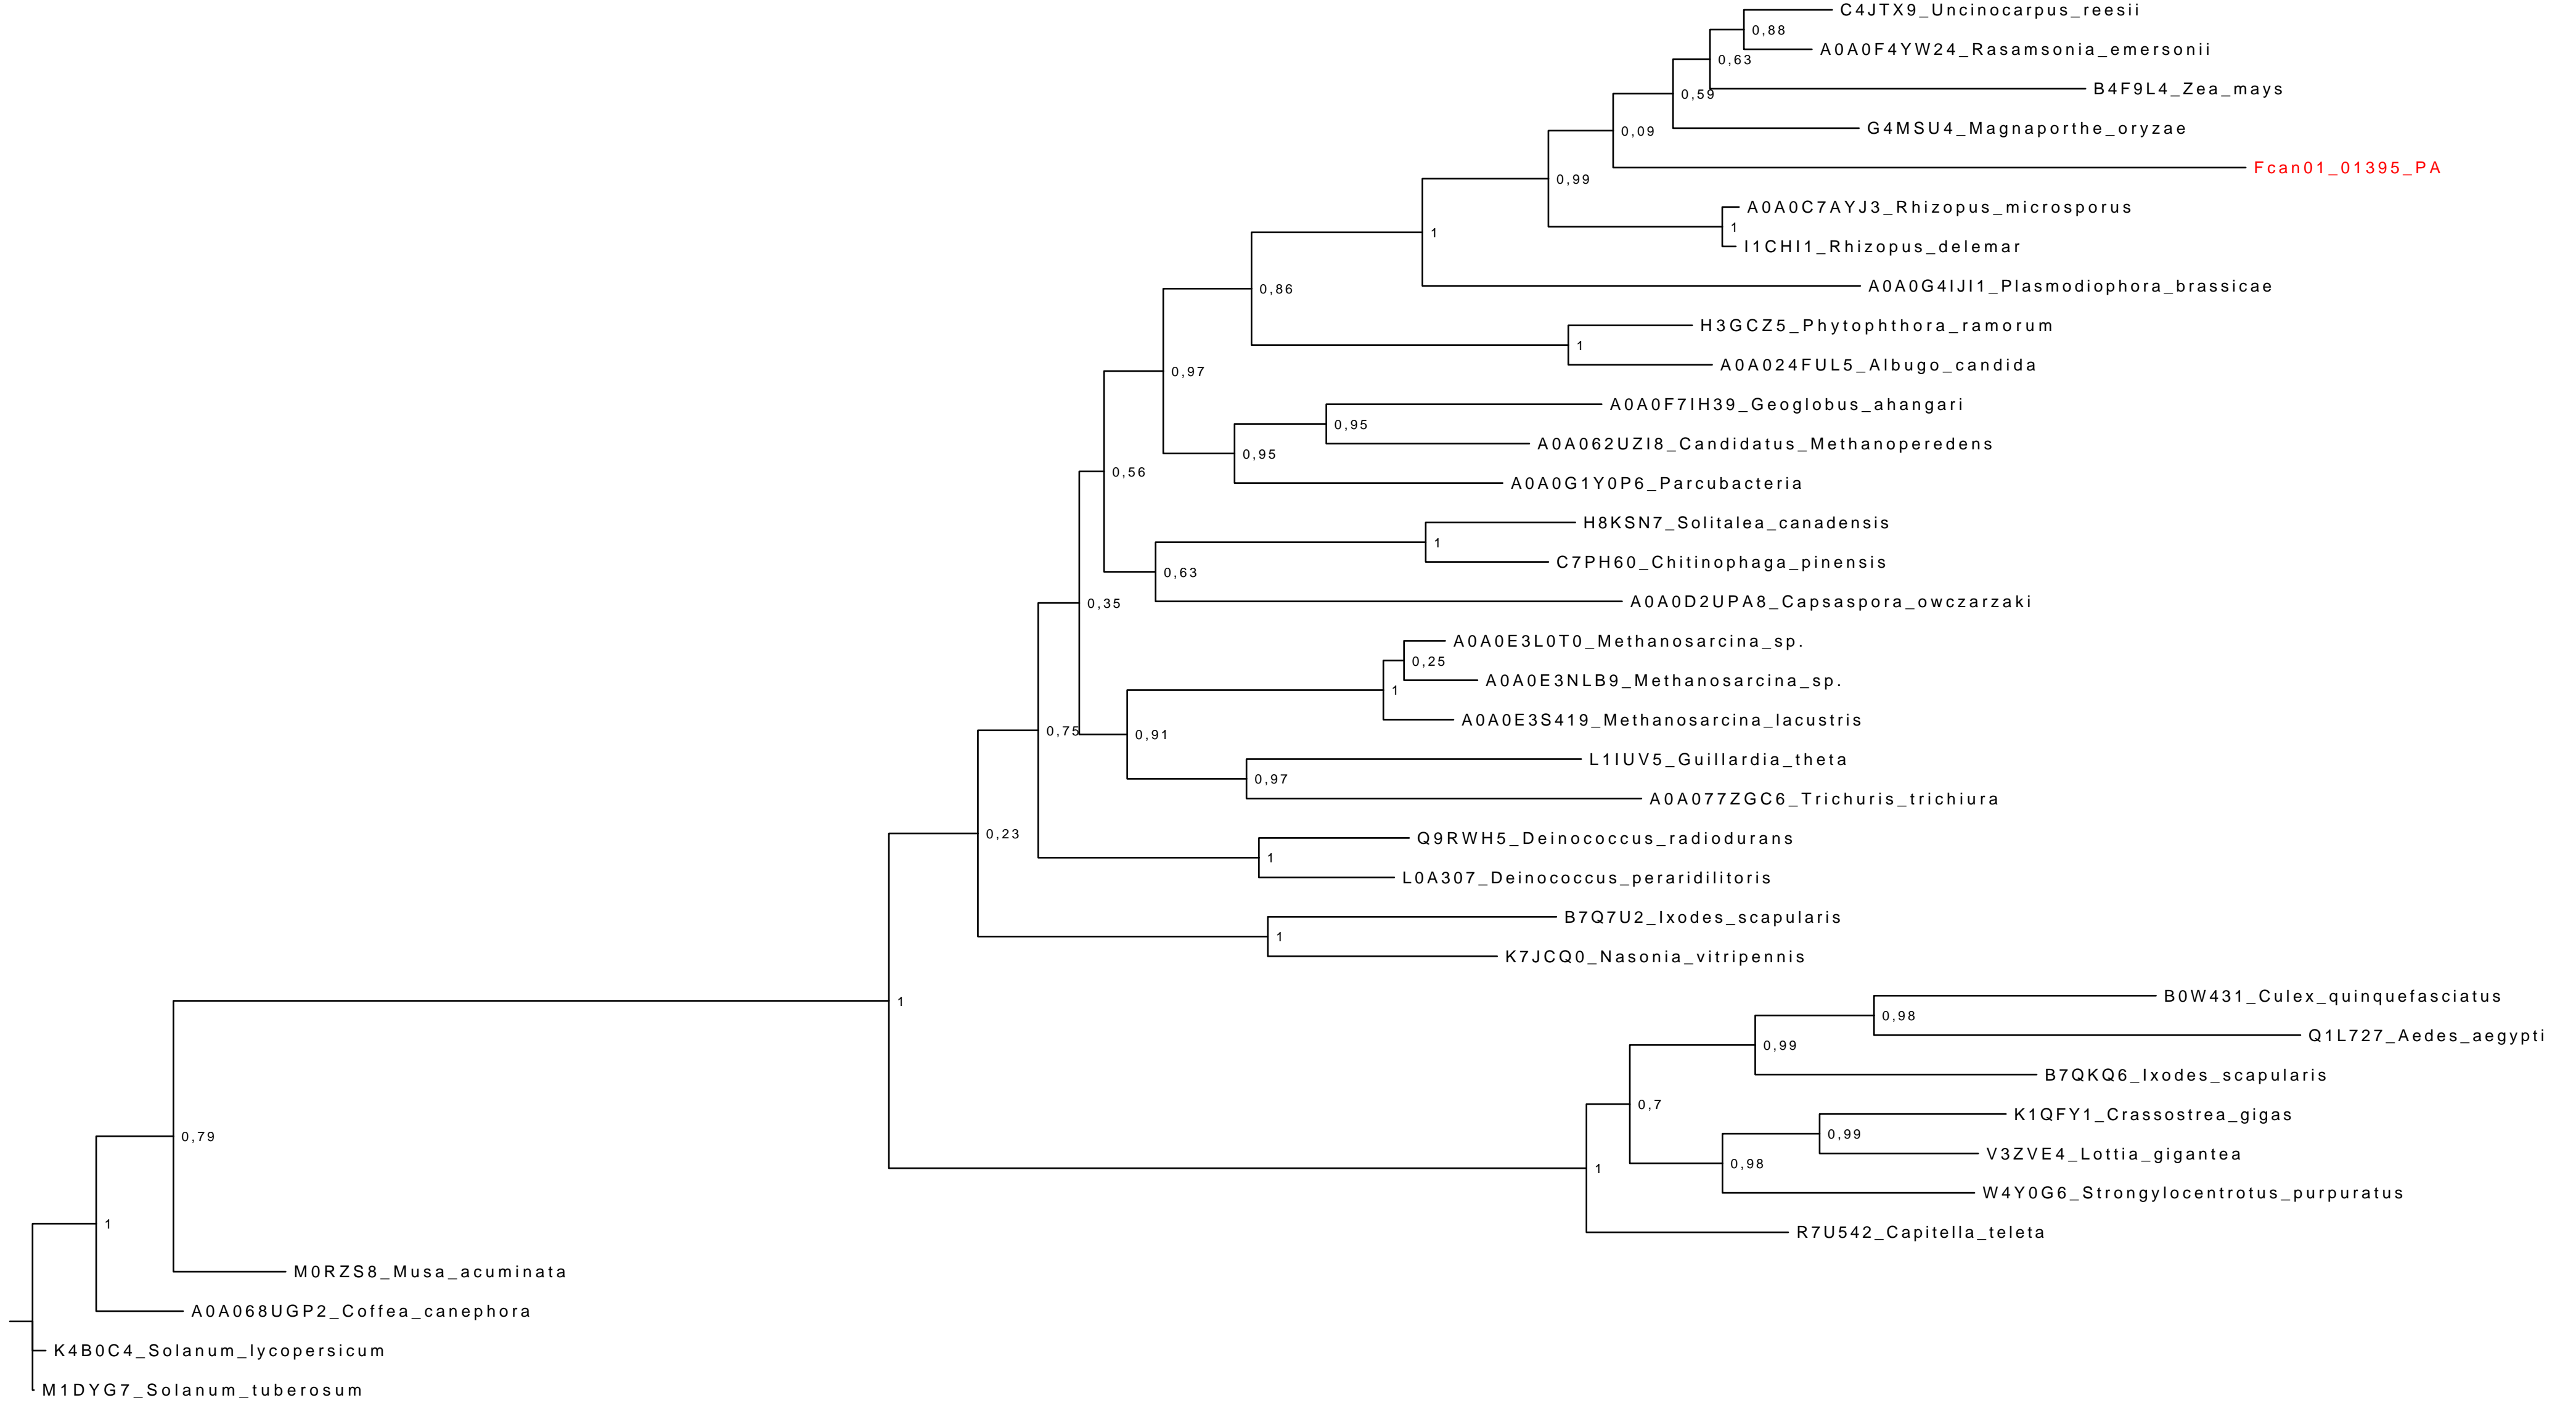

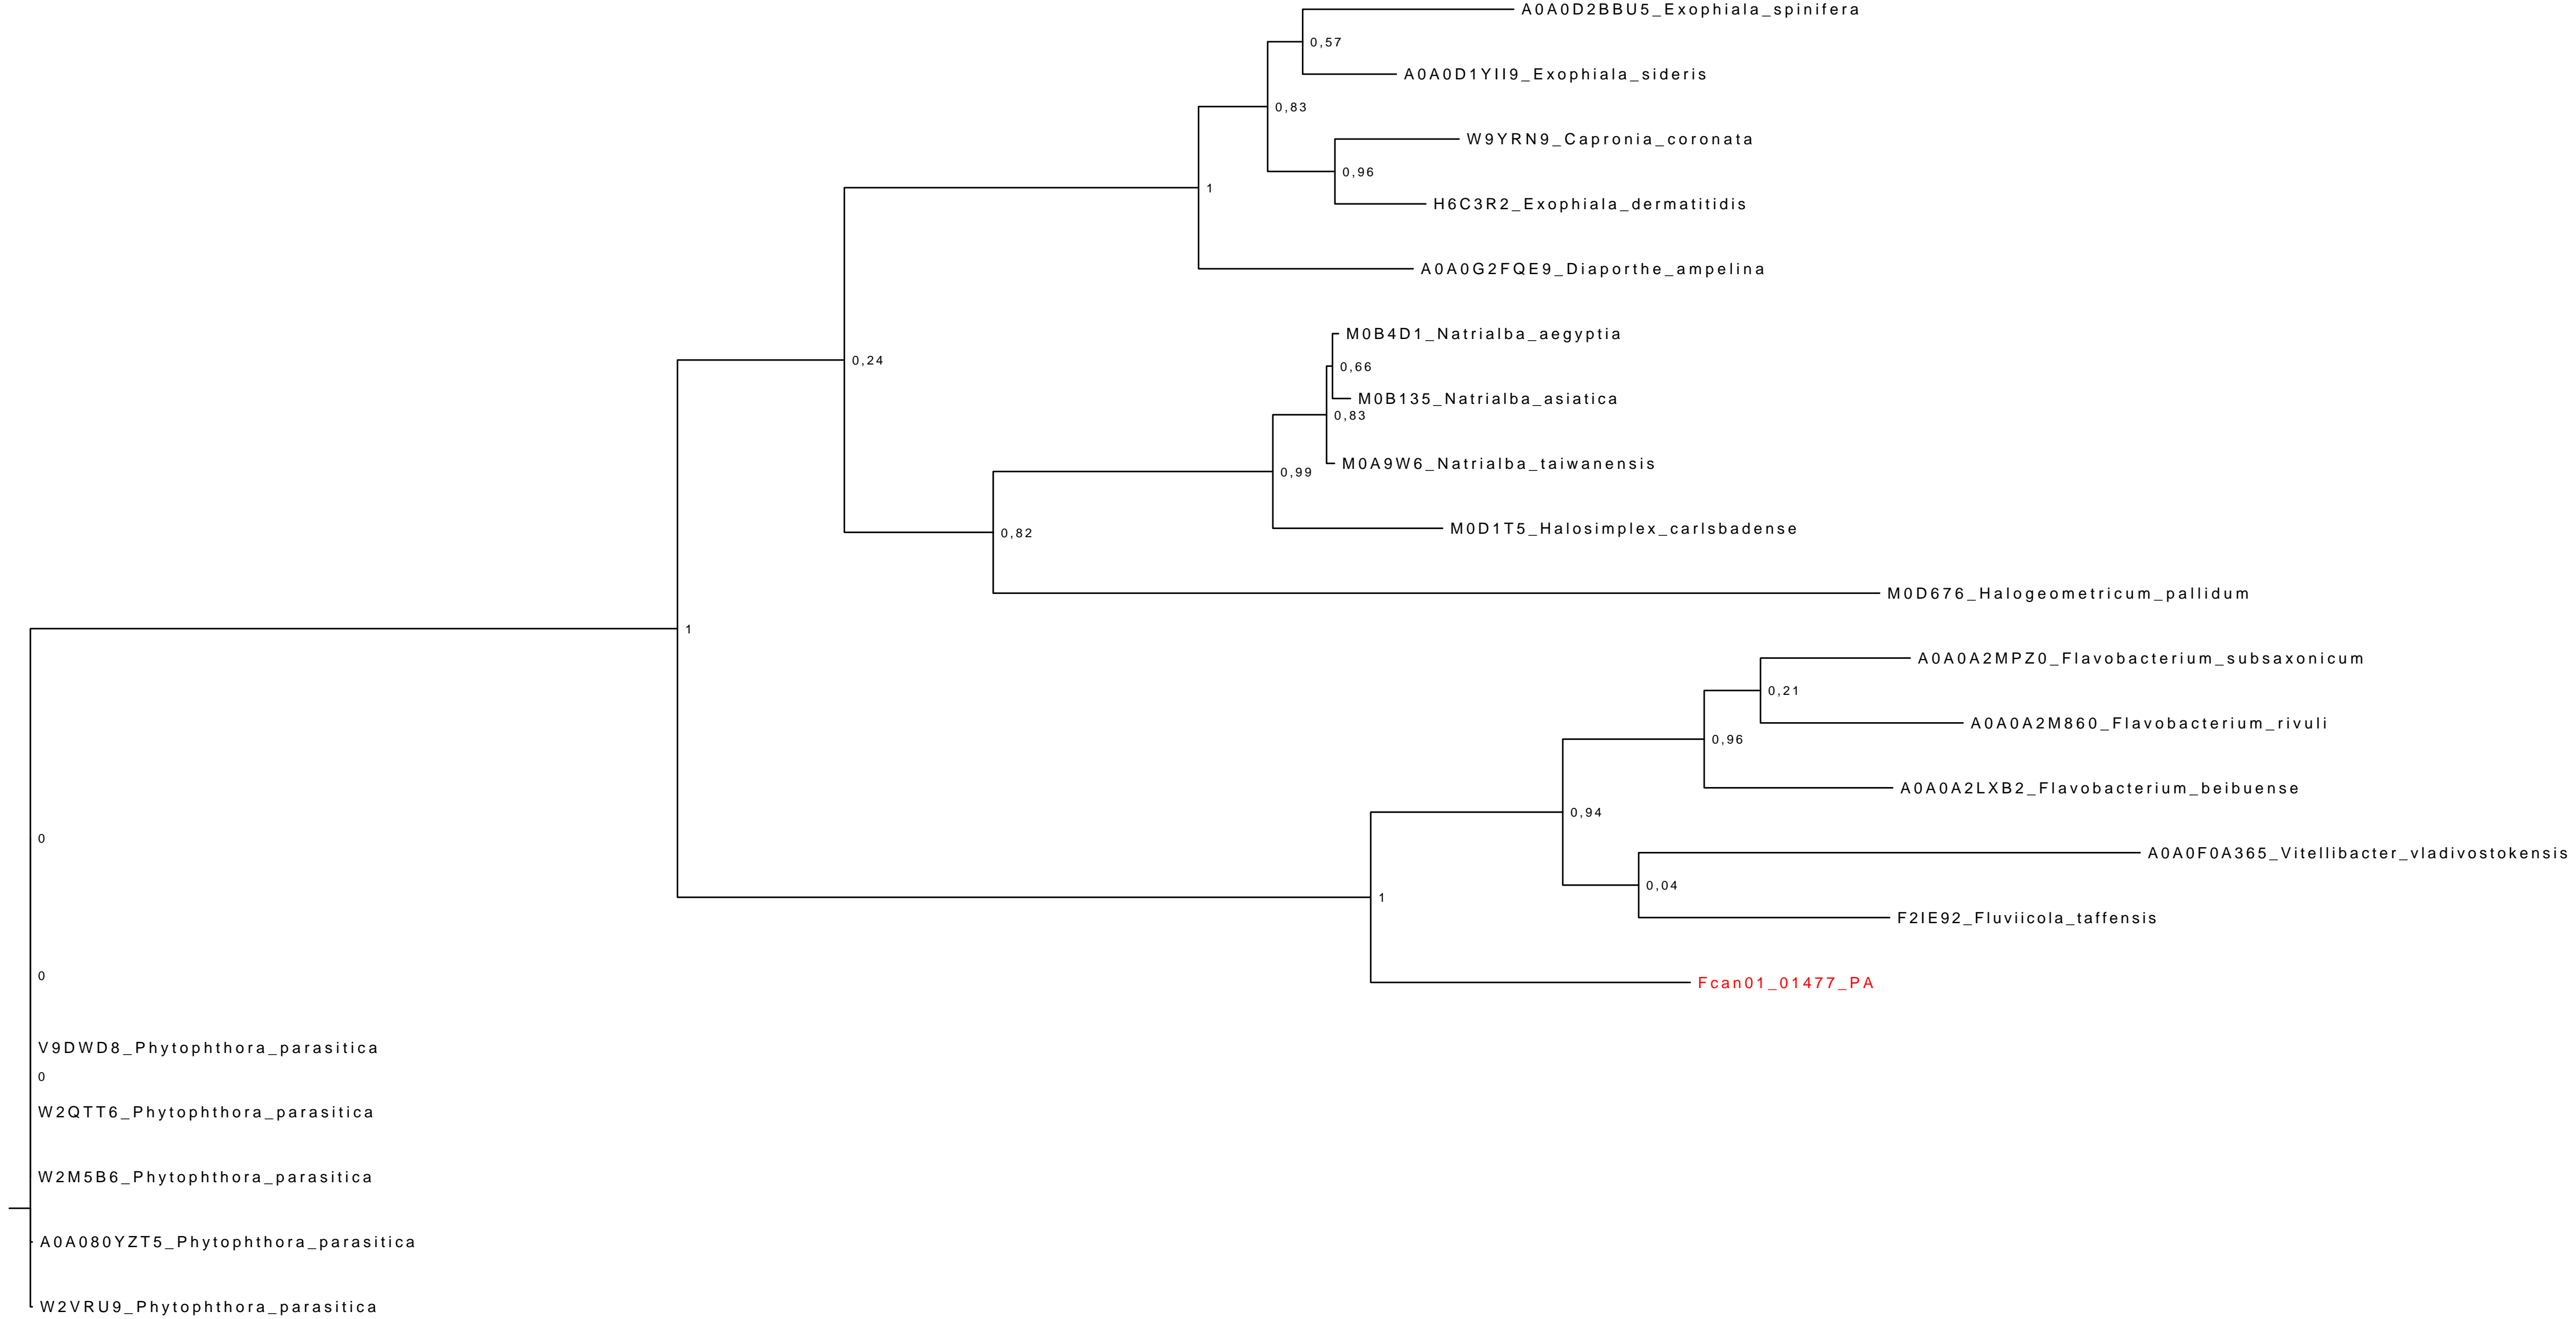

0.4

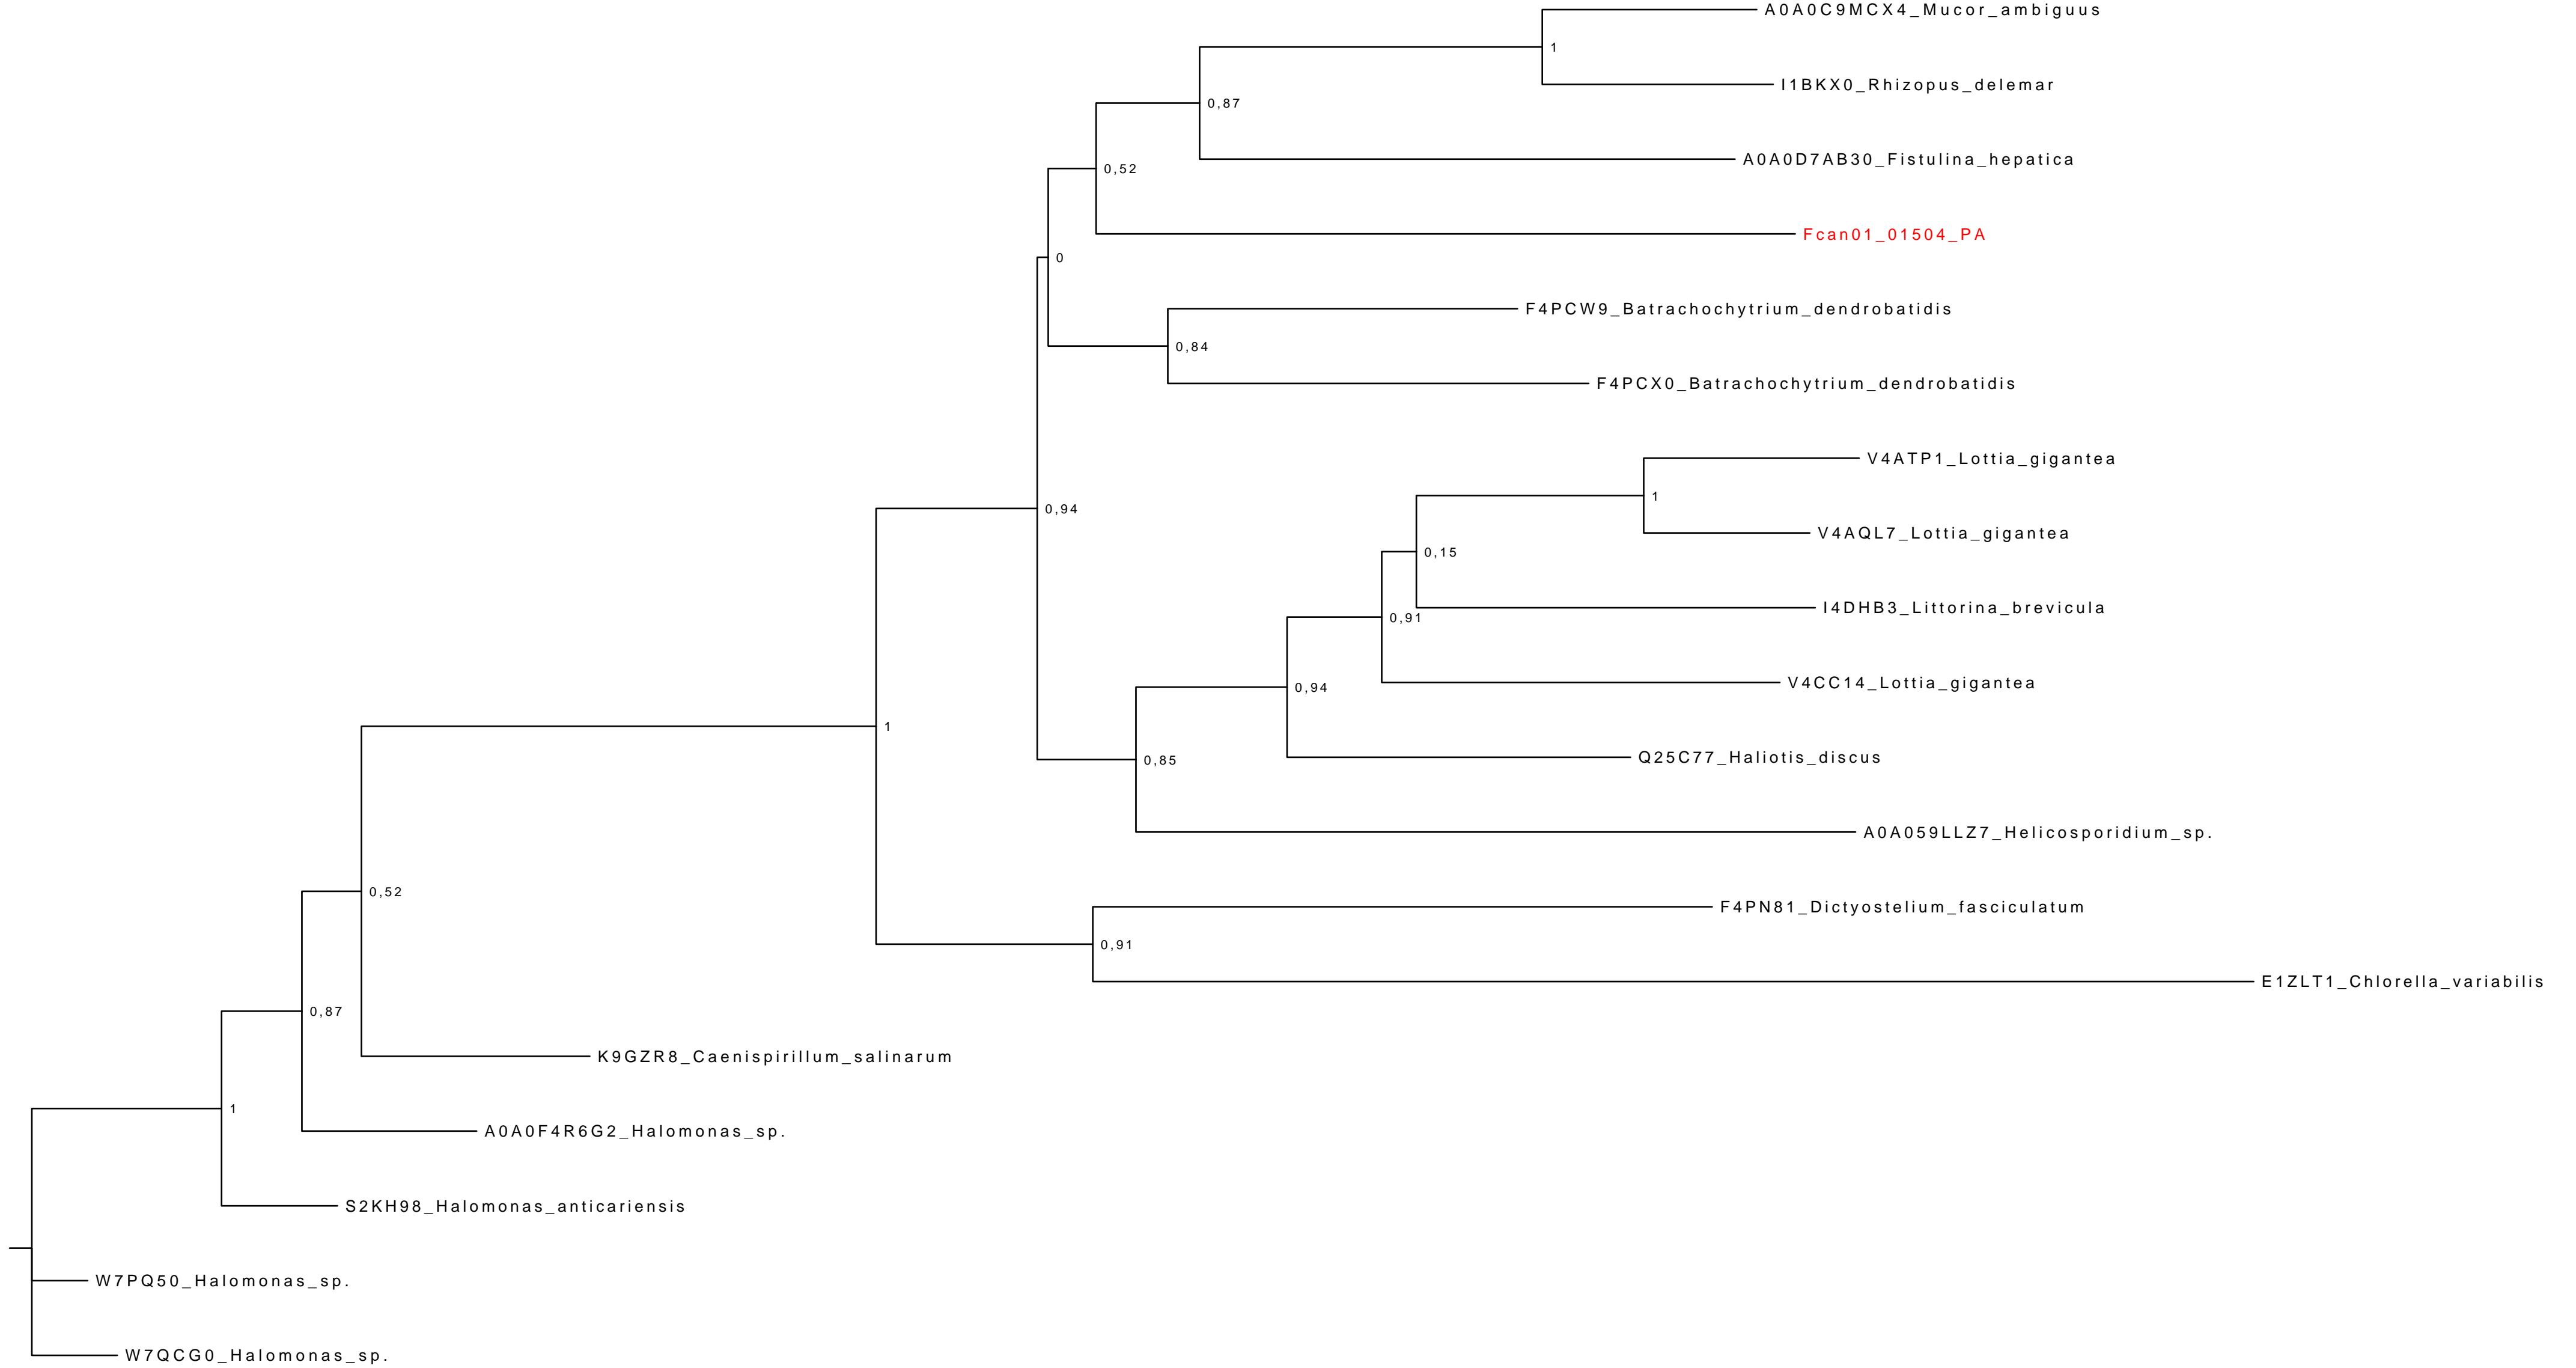



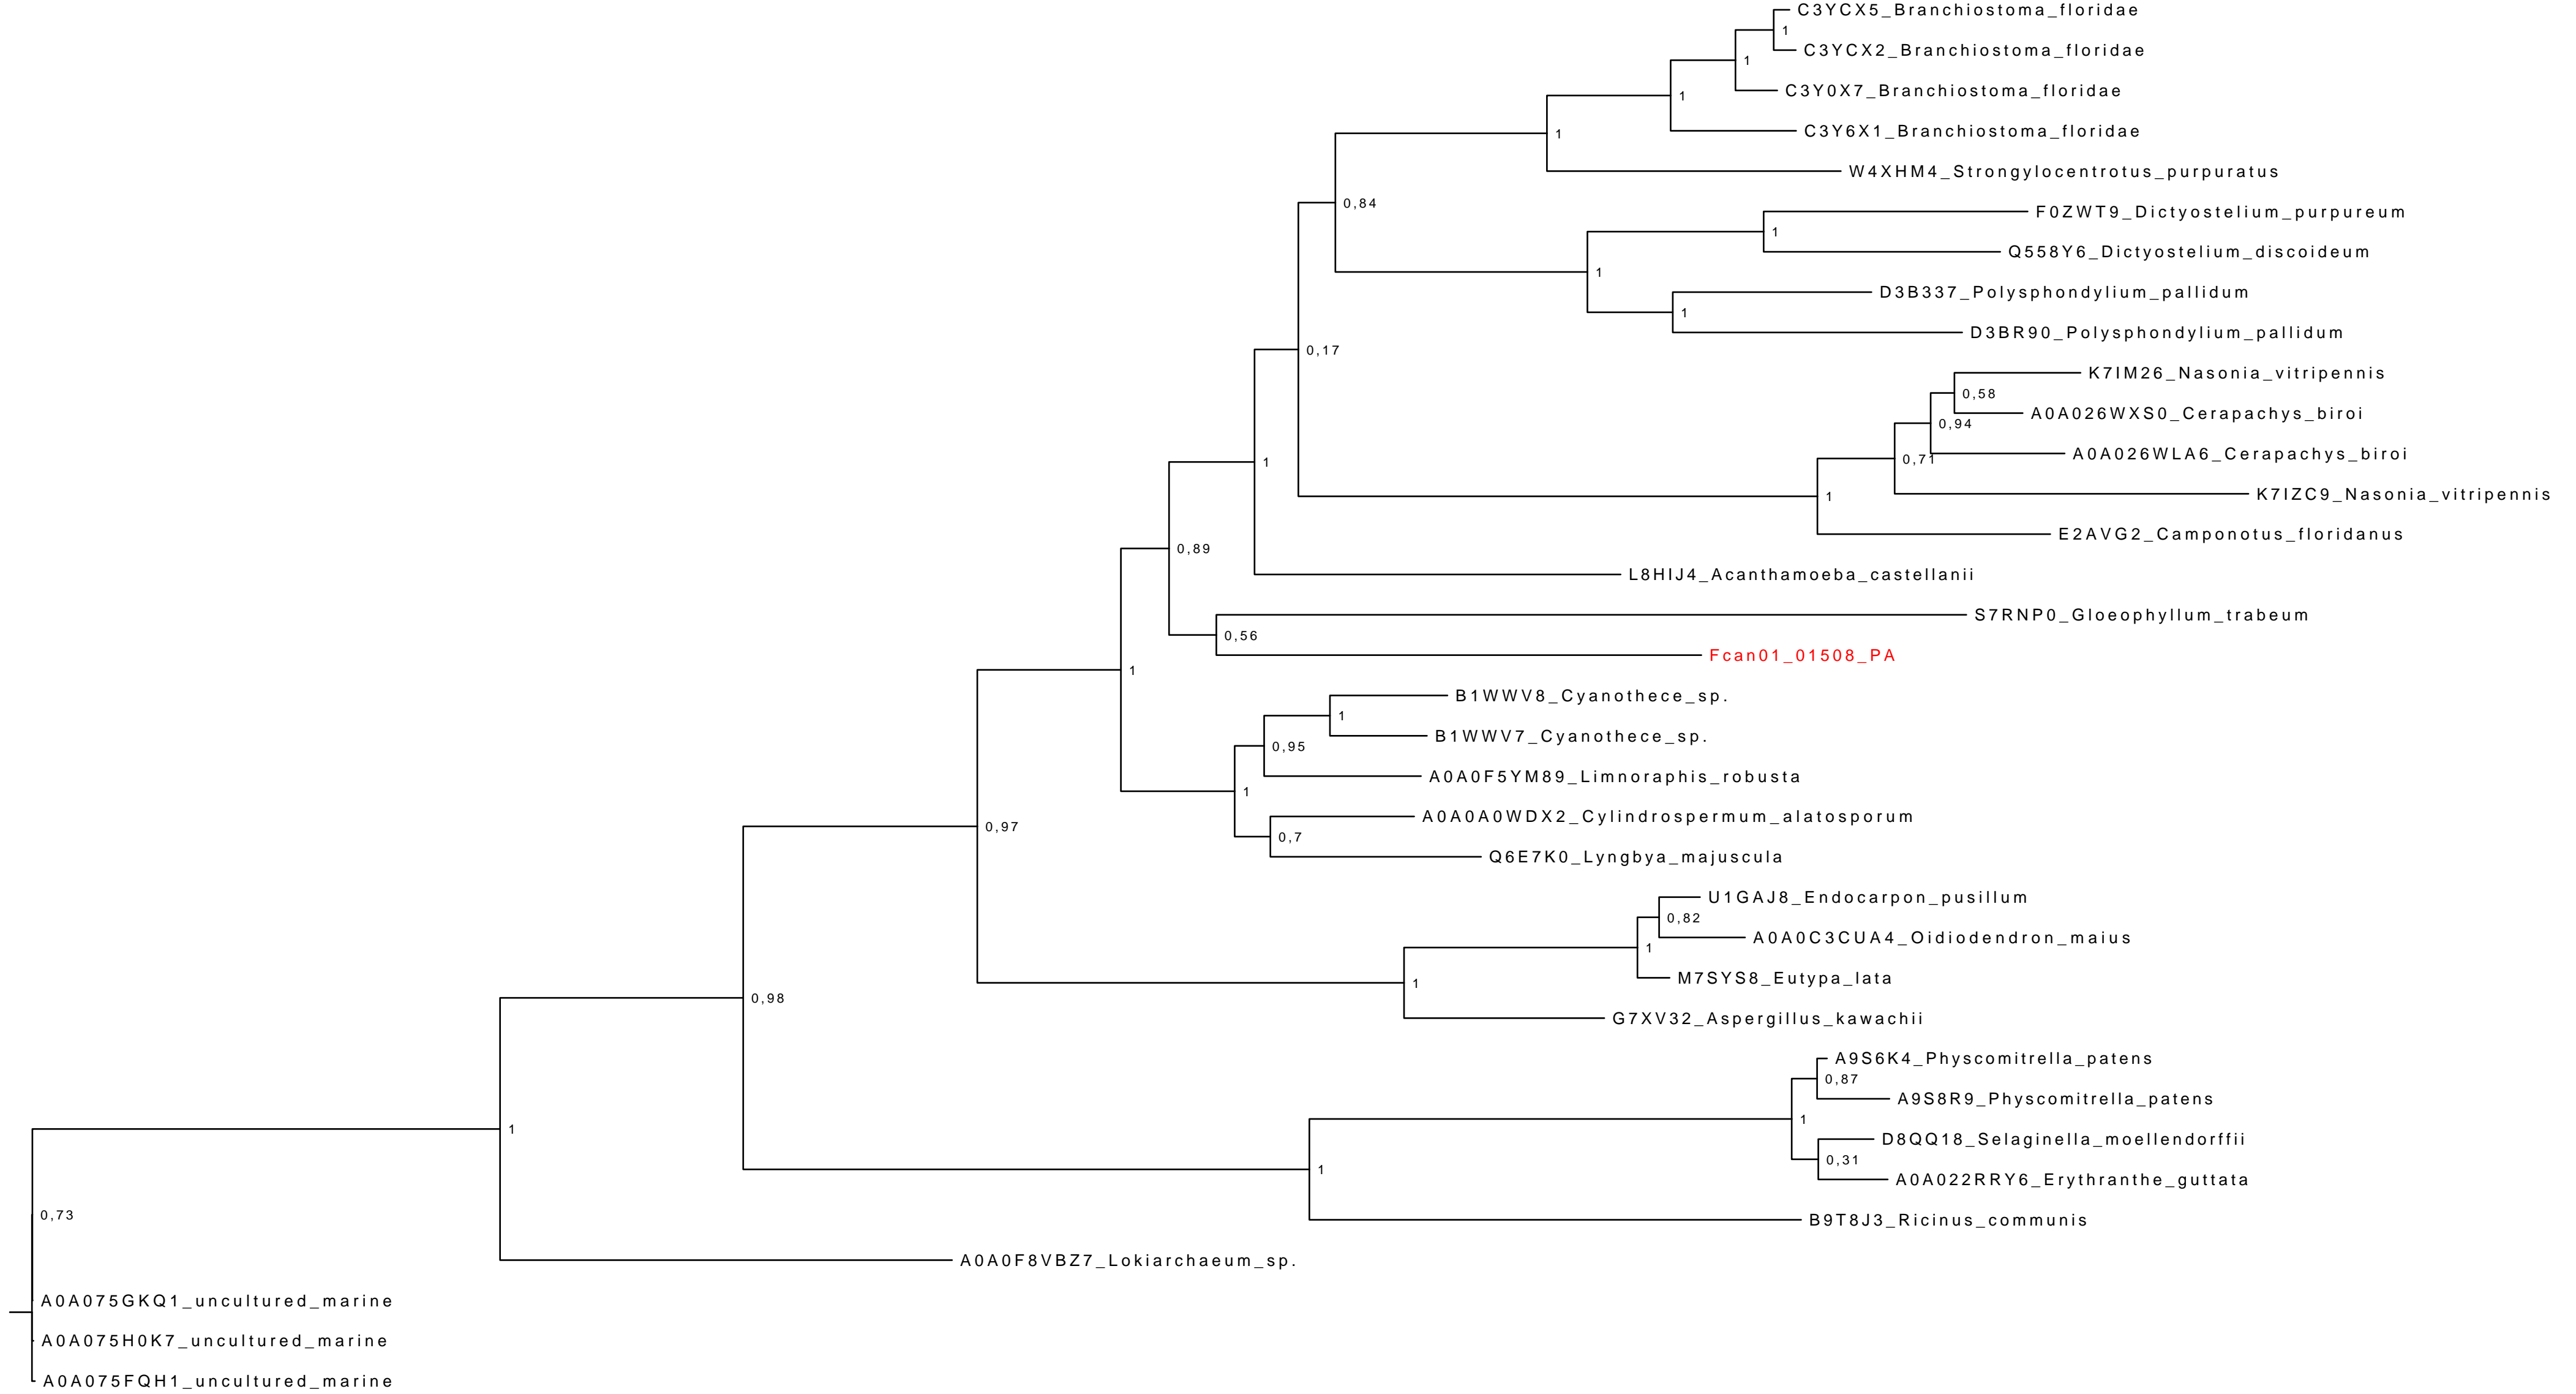

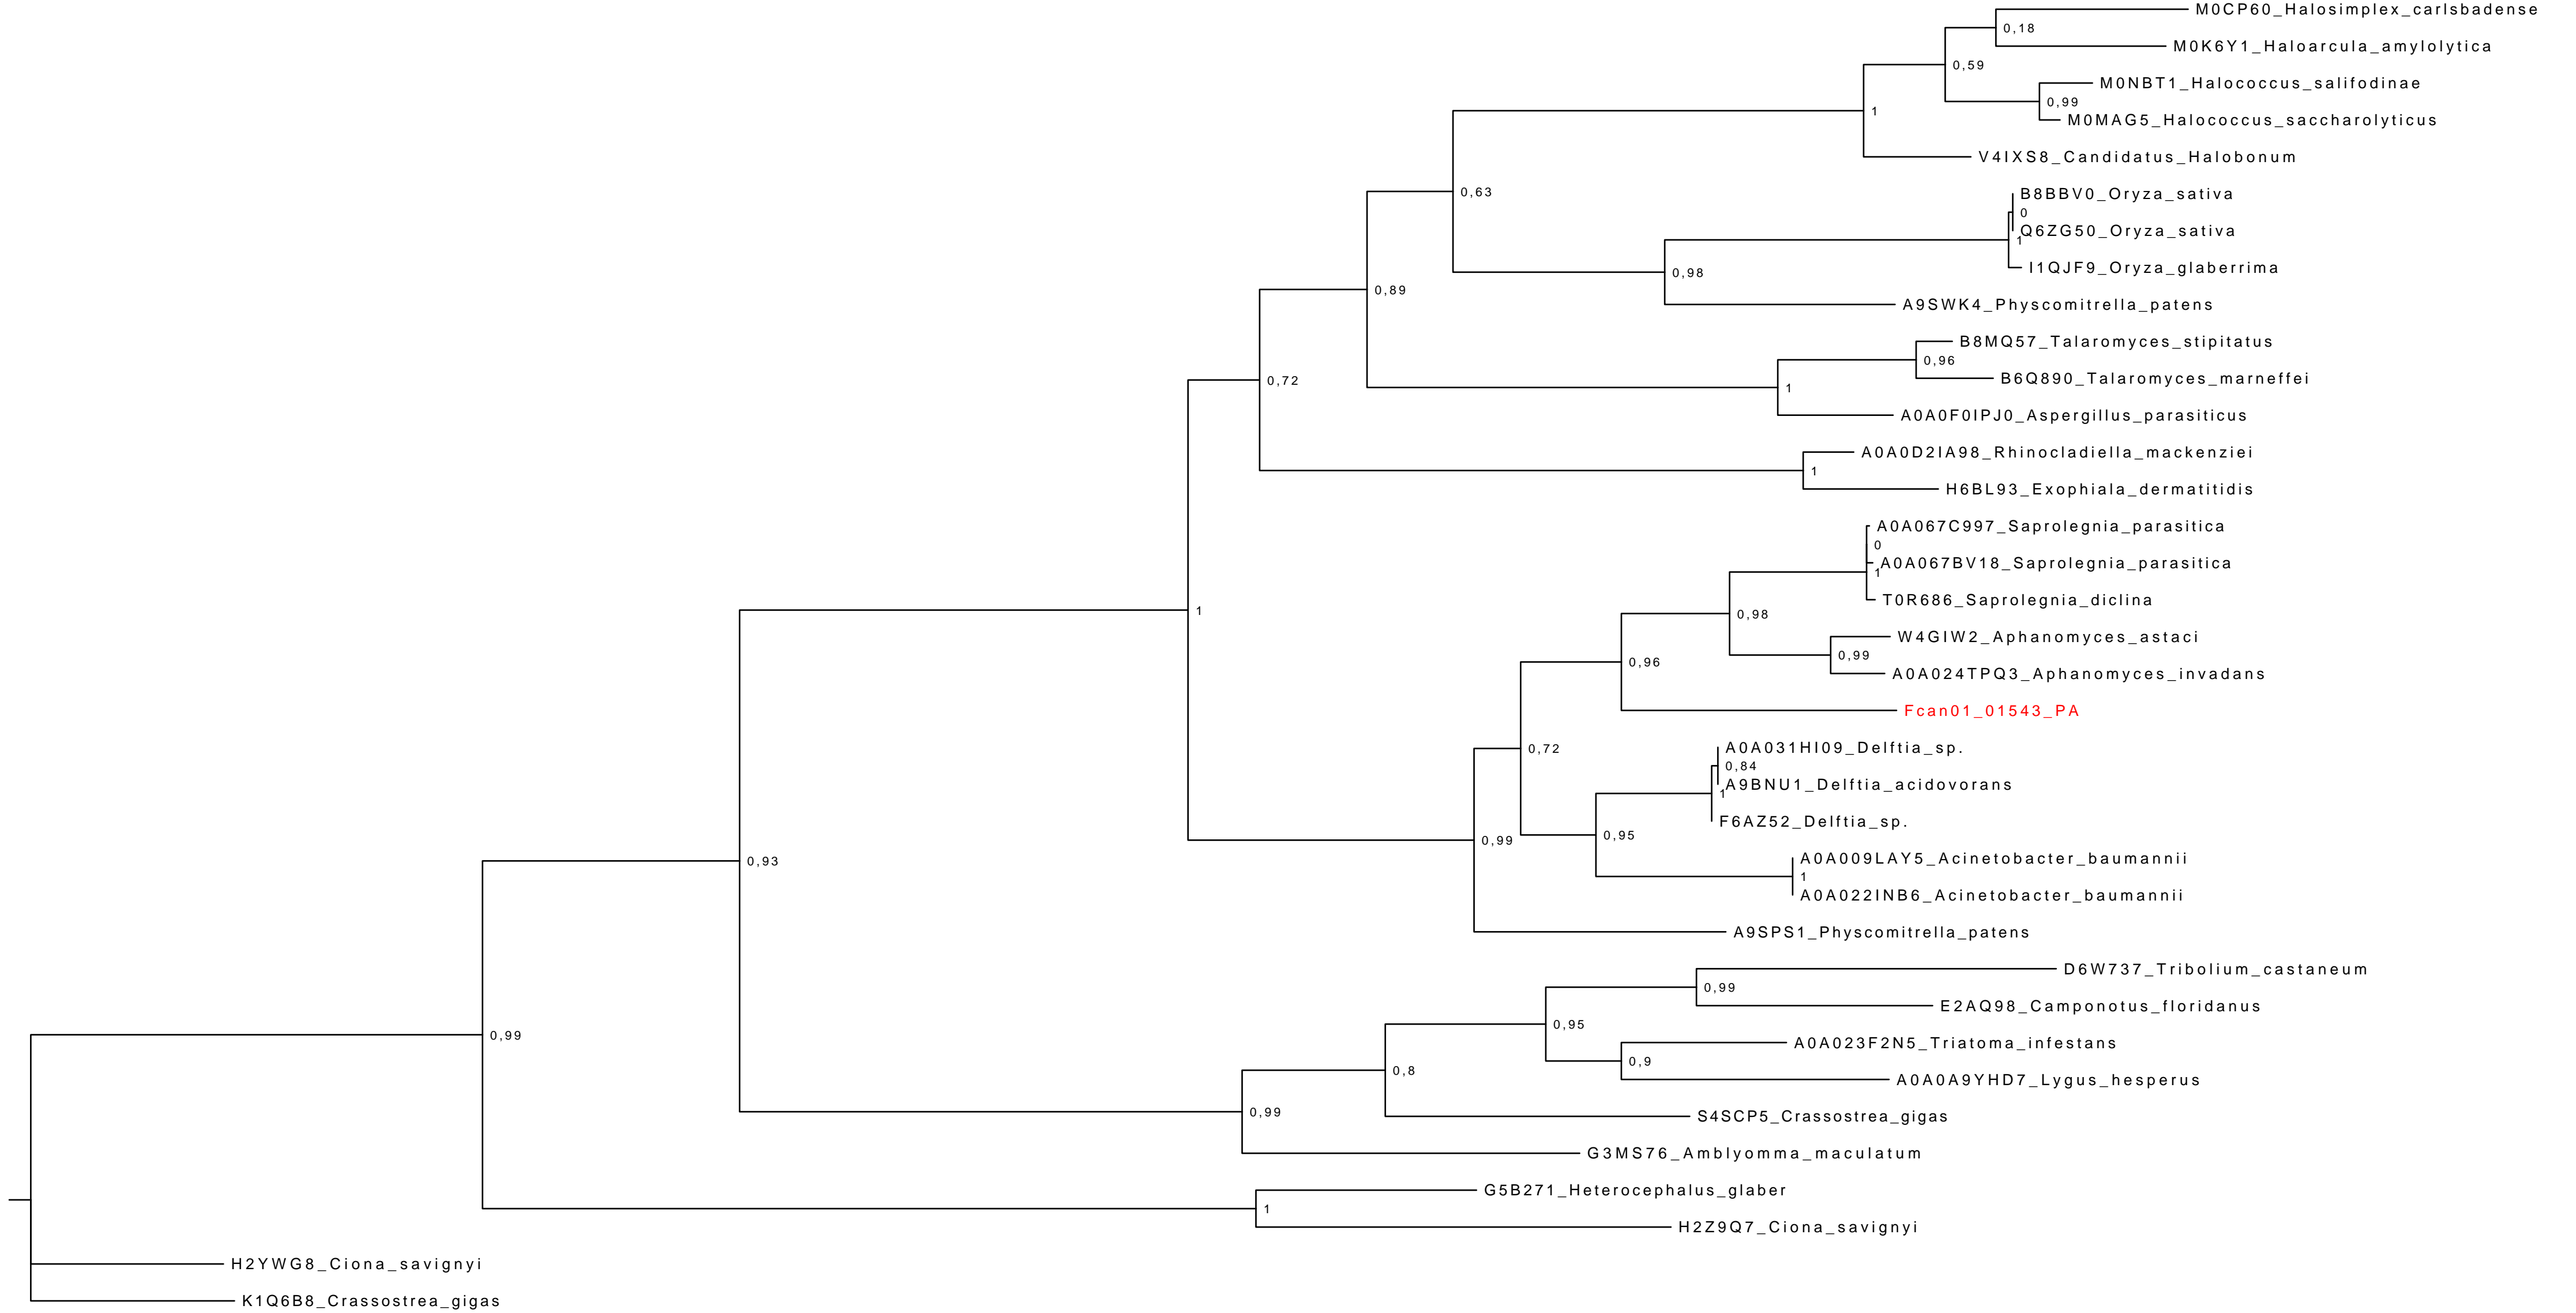

0.4

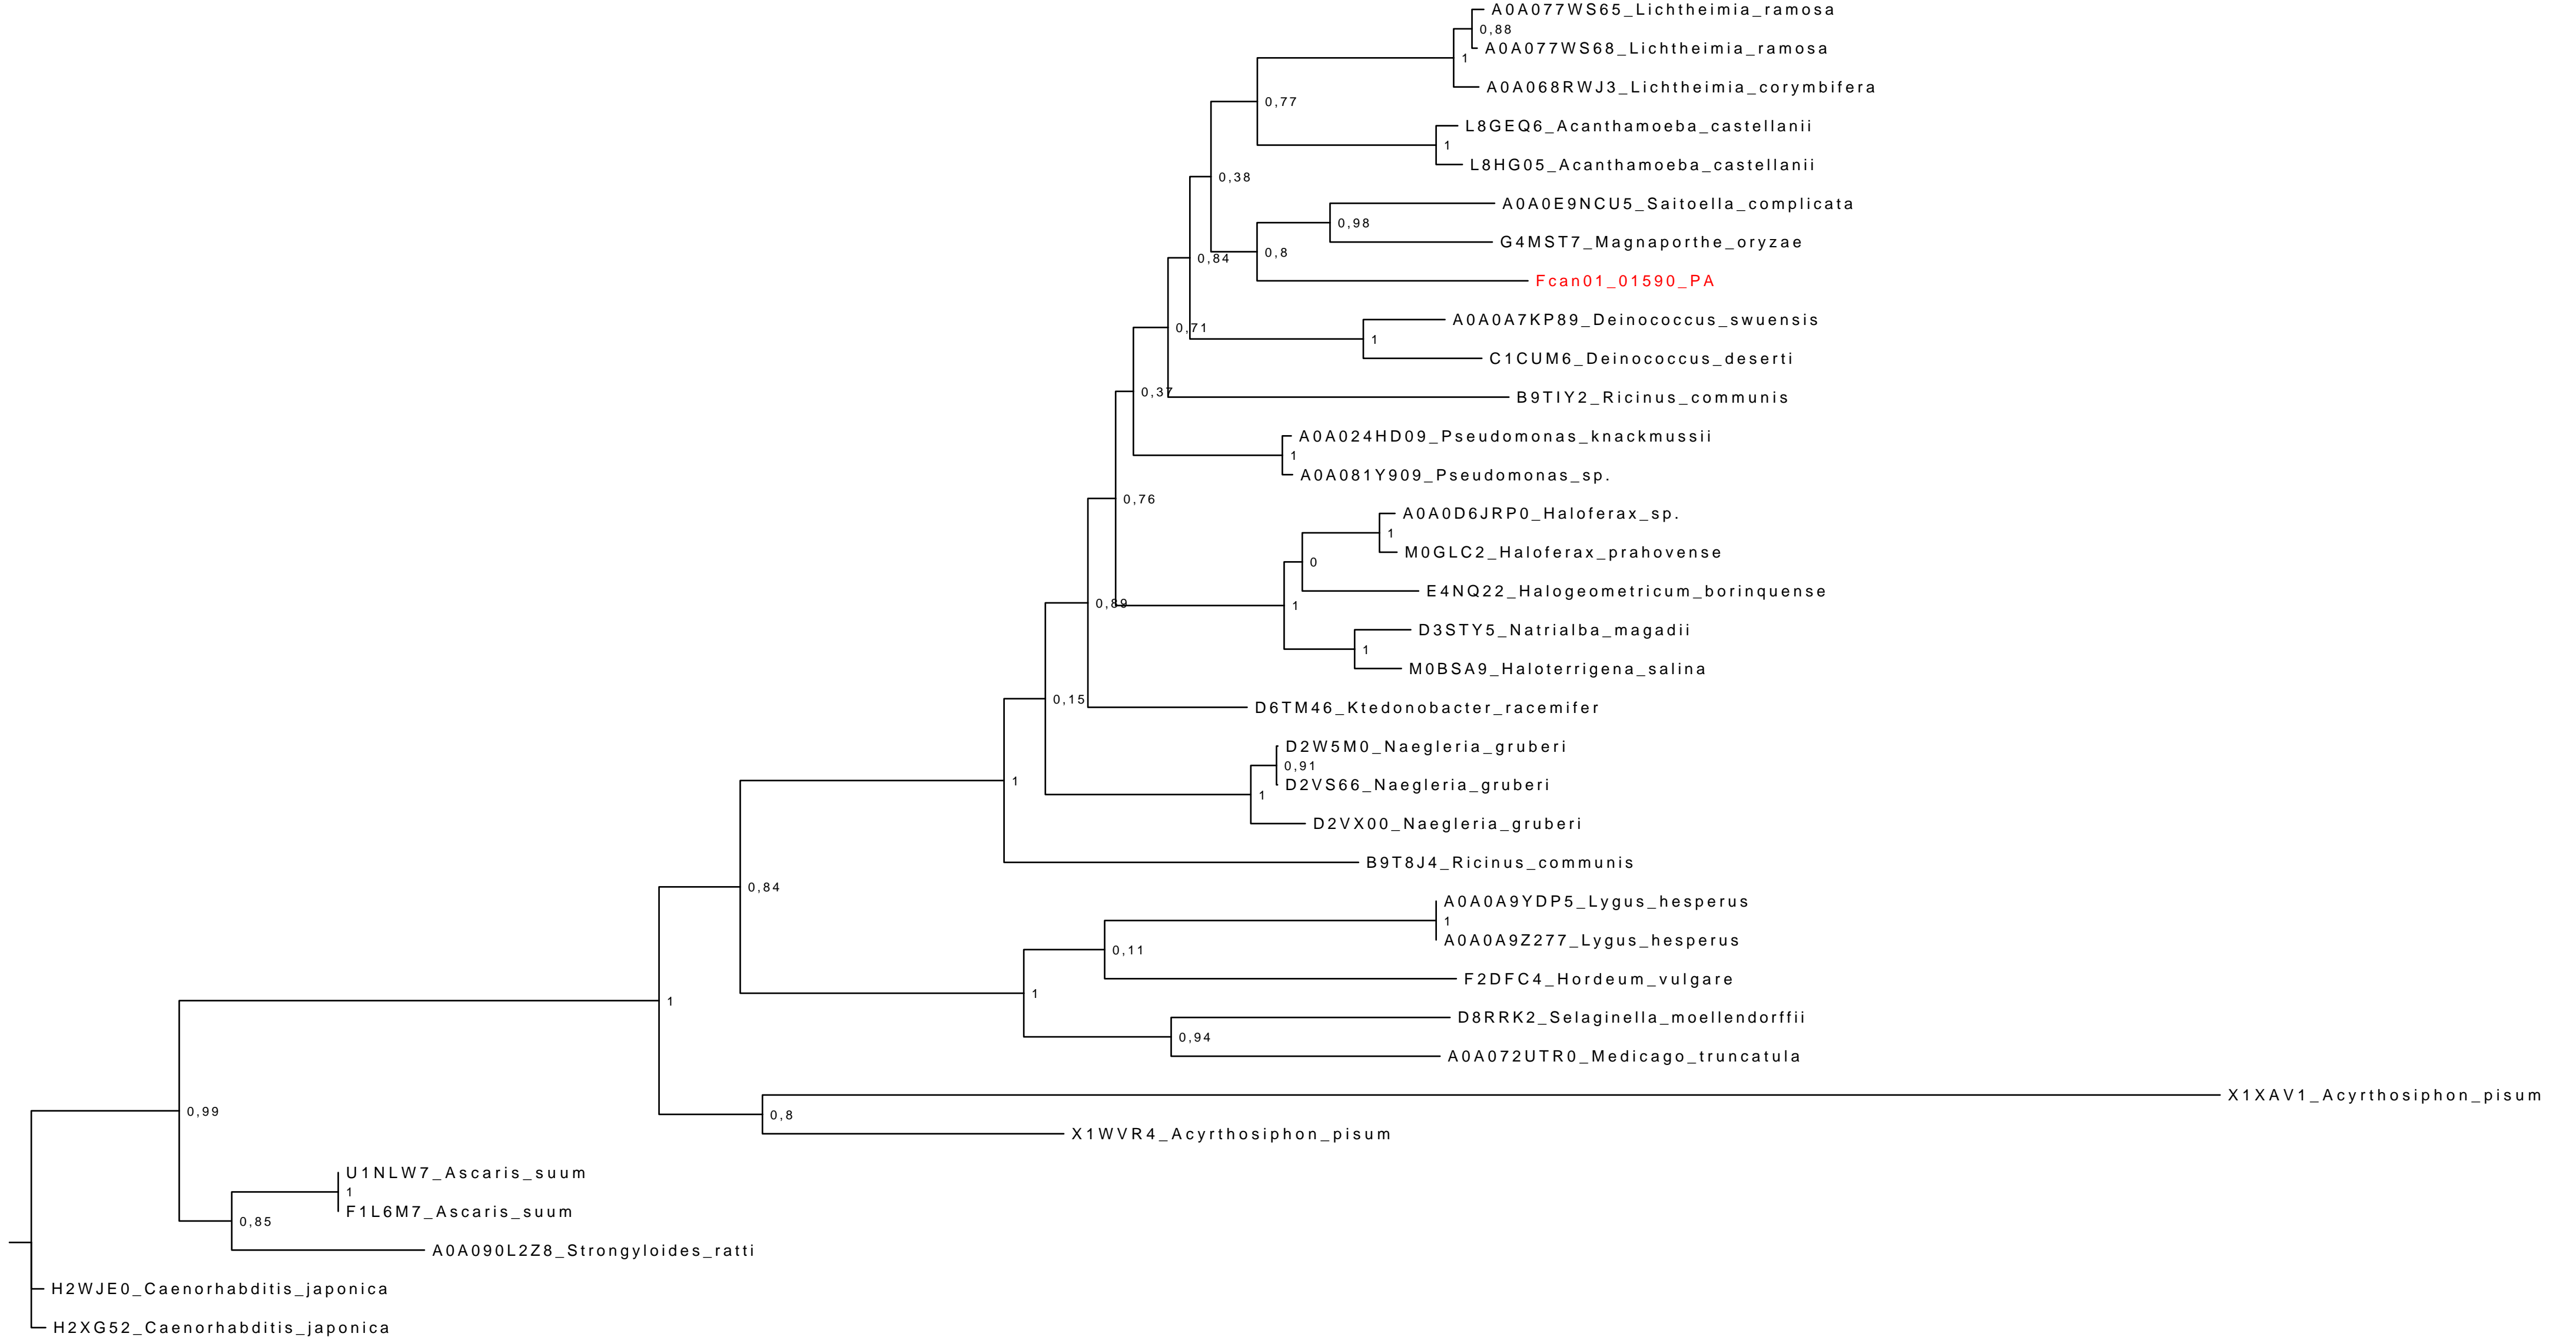

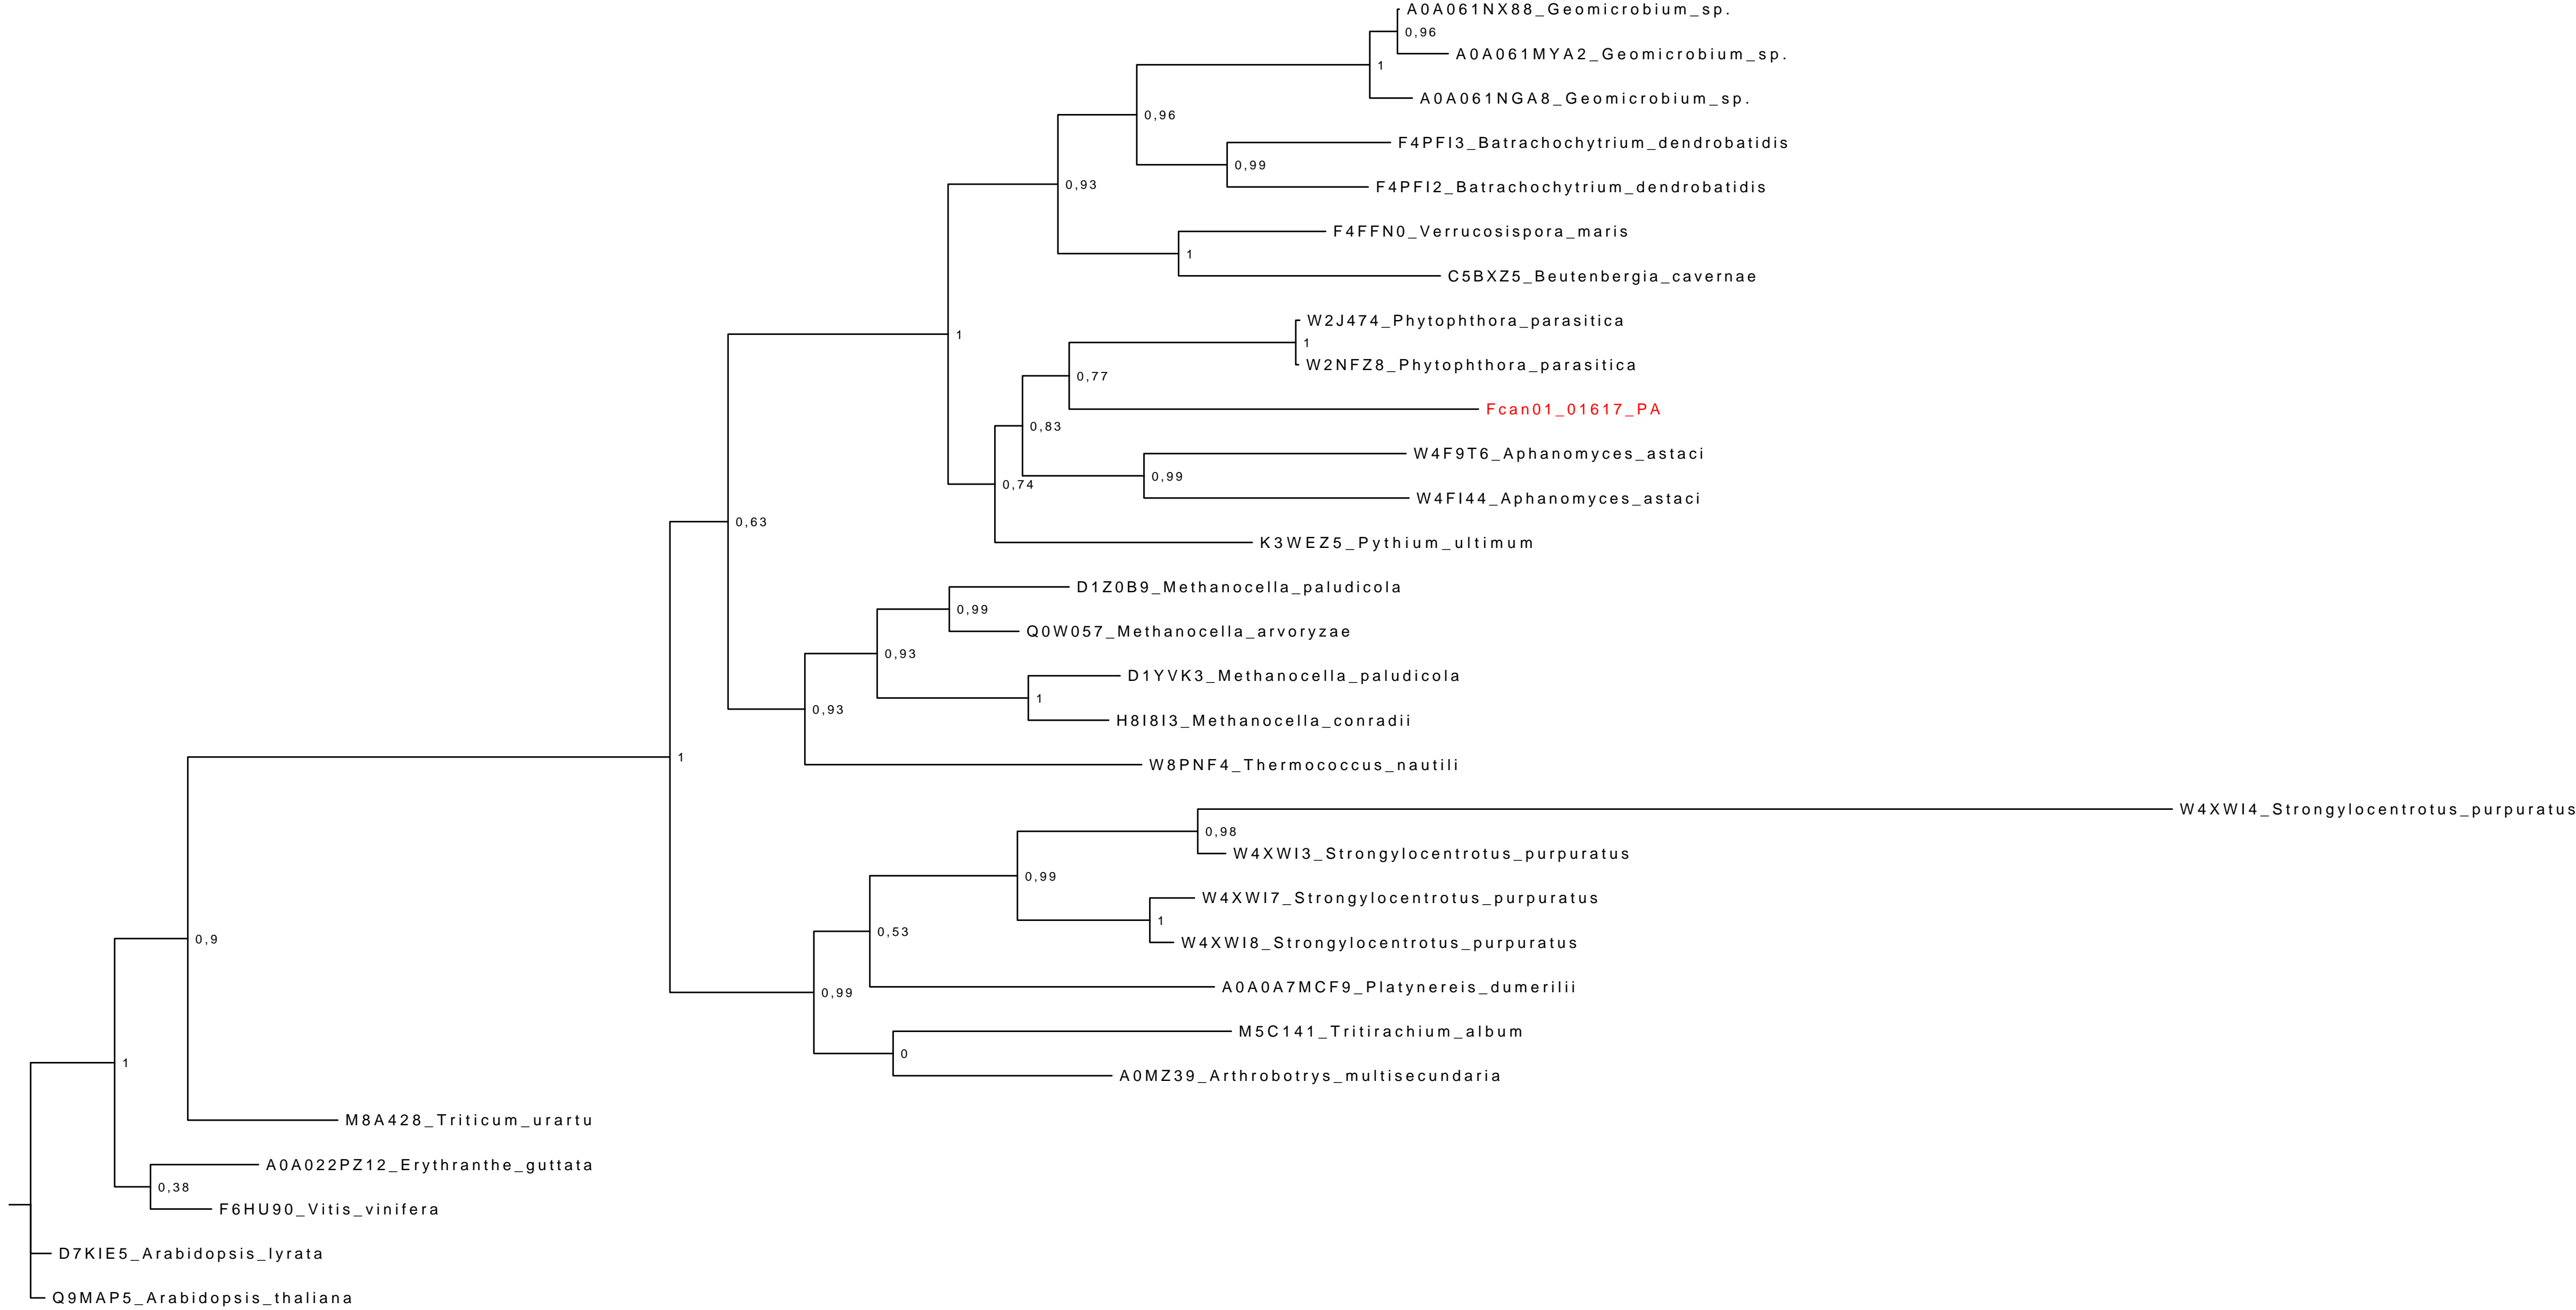

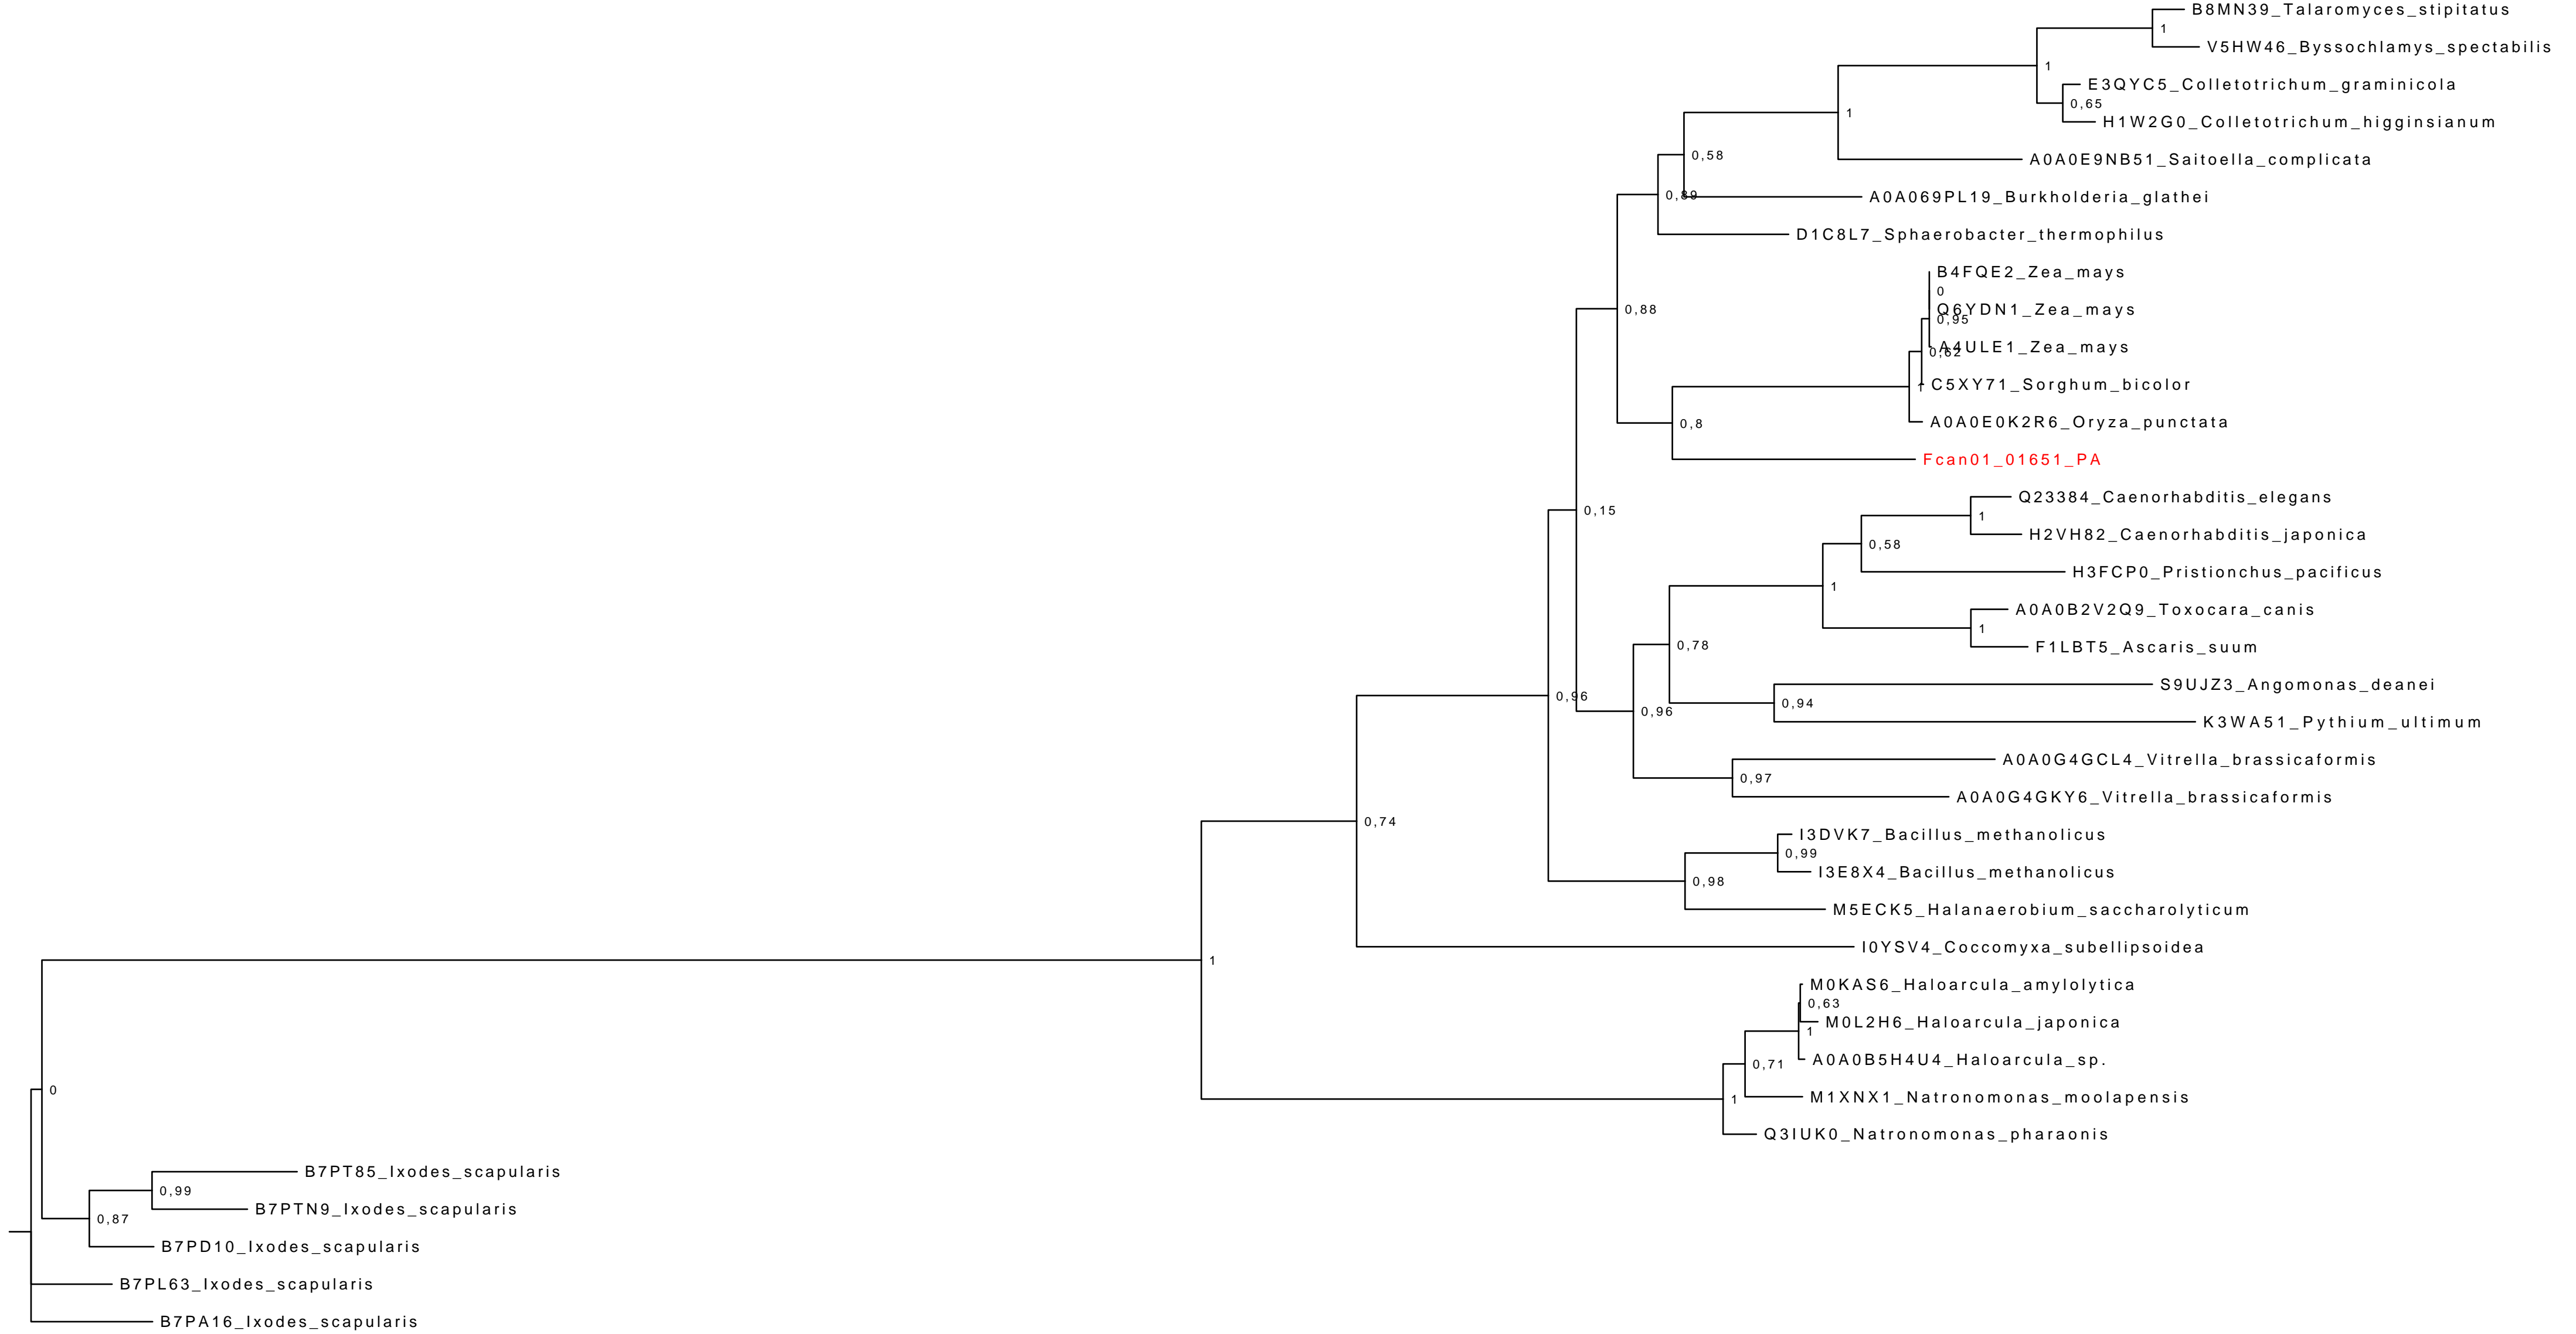

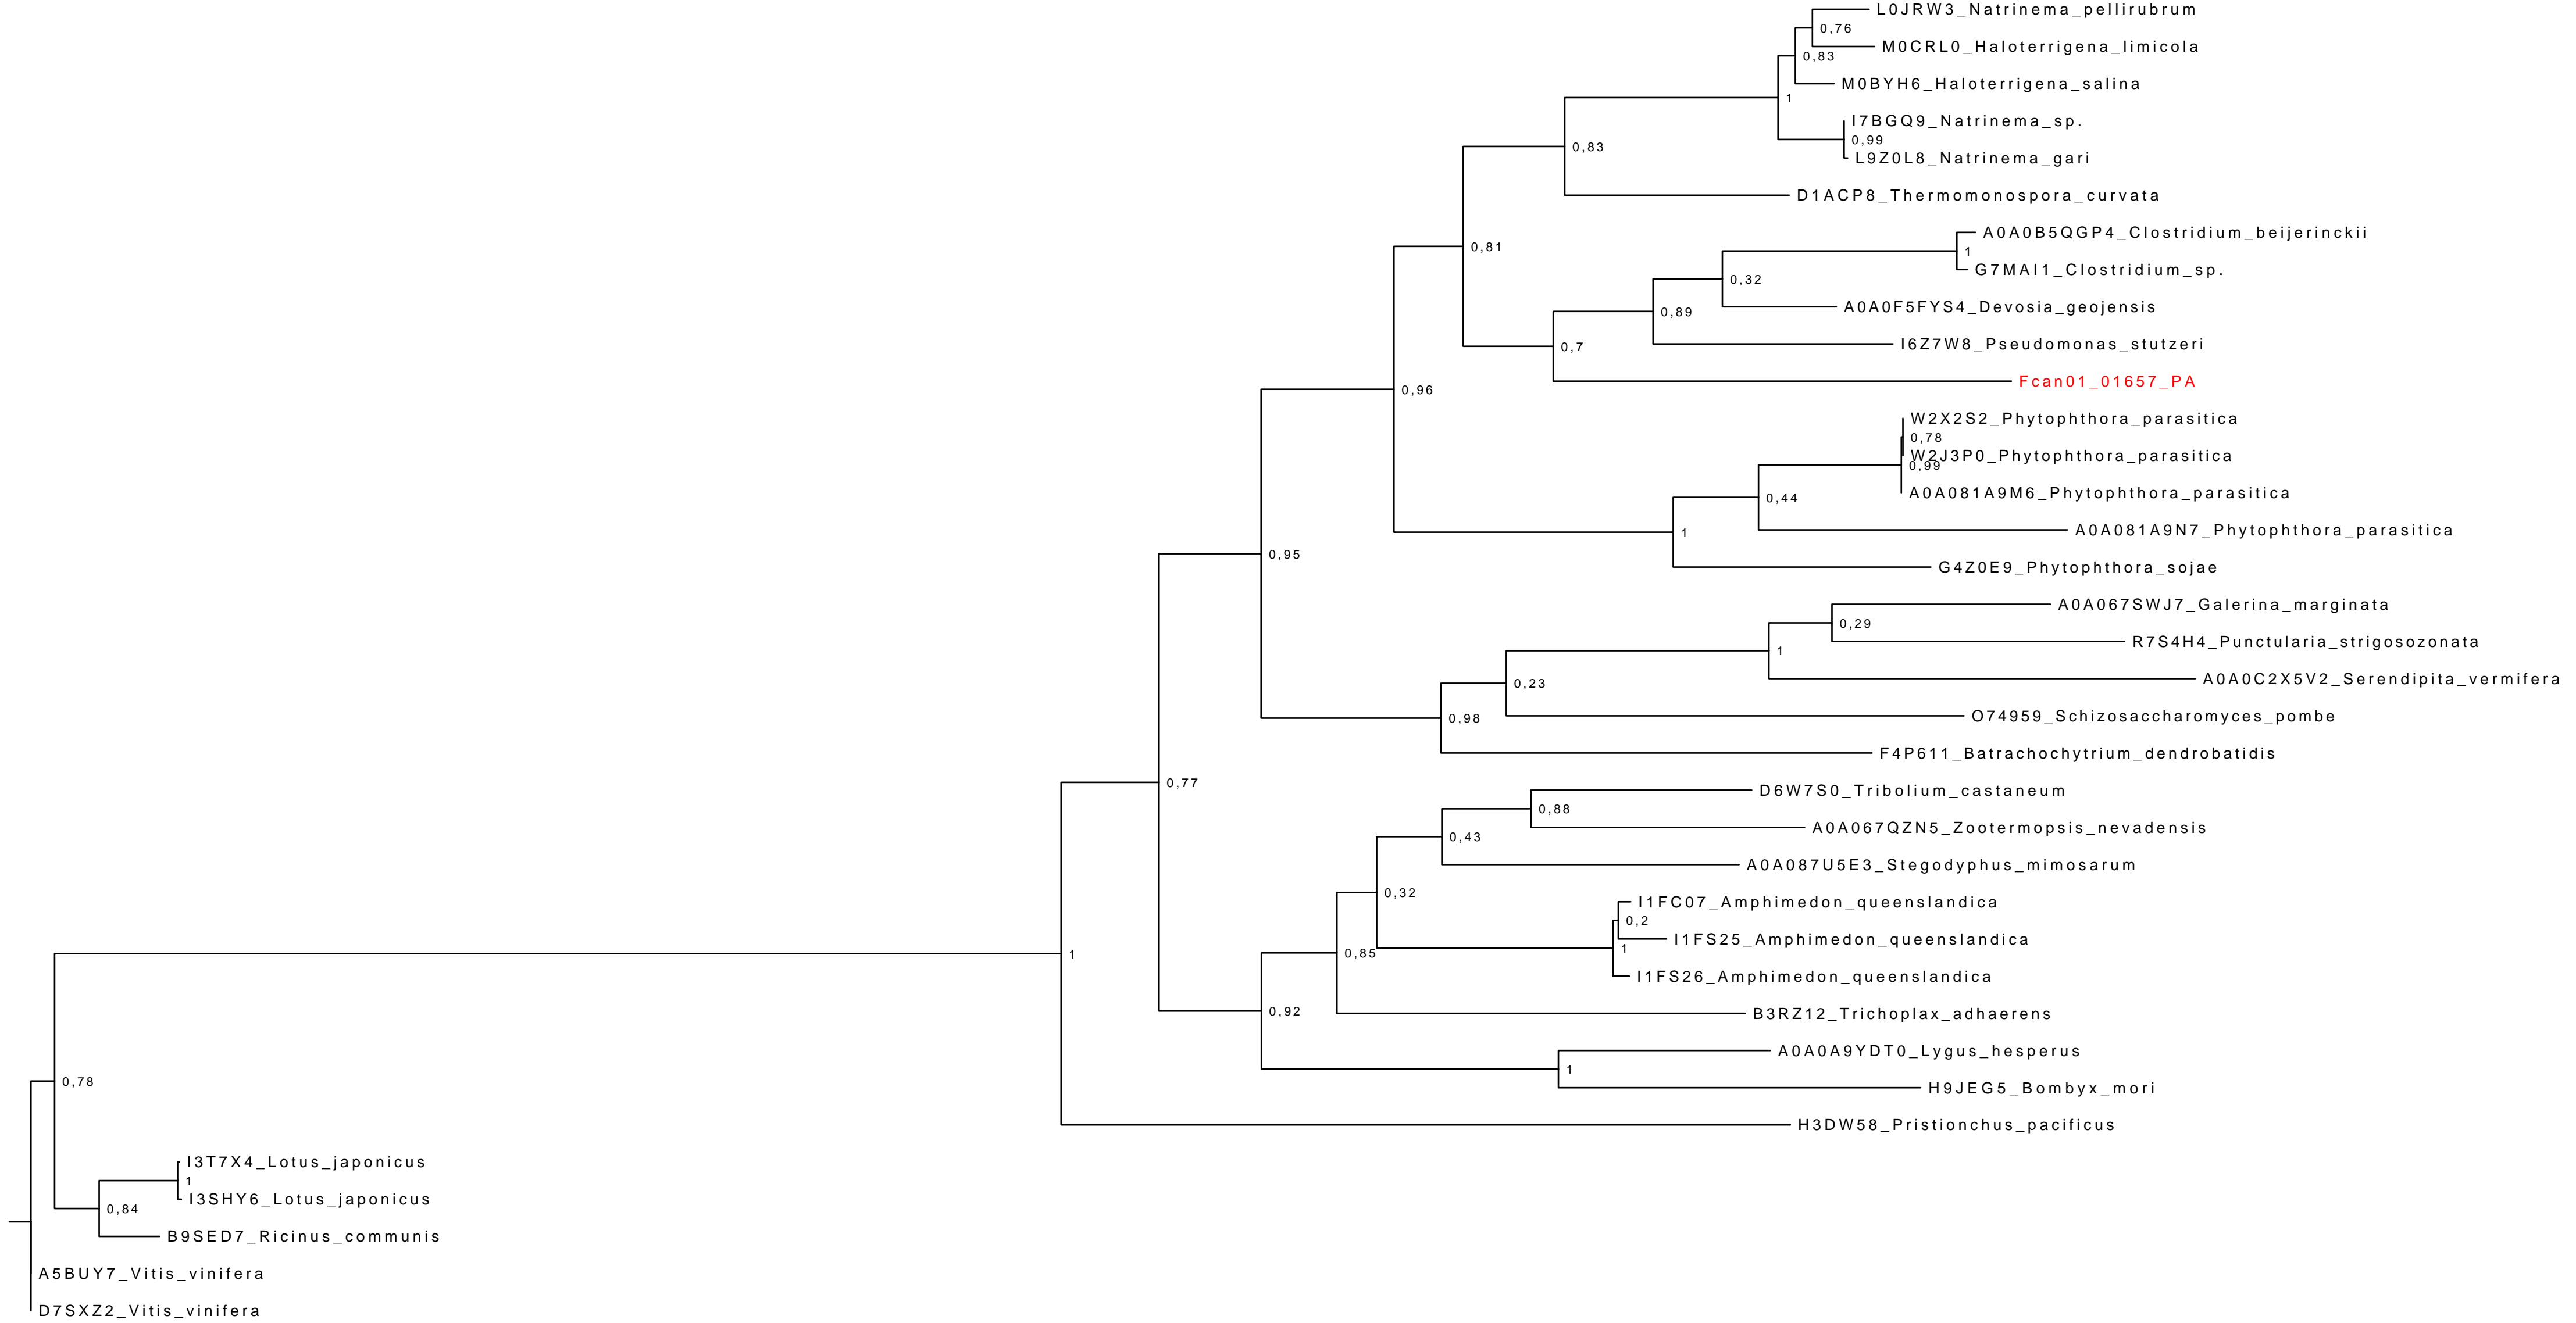

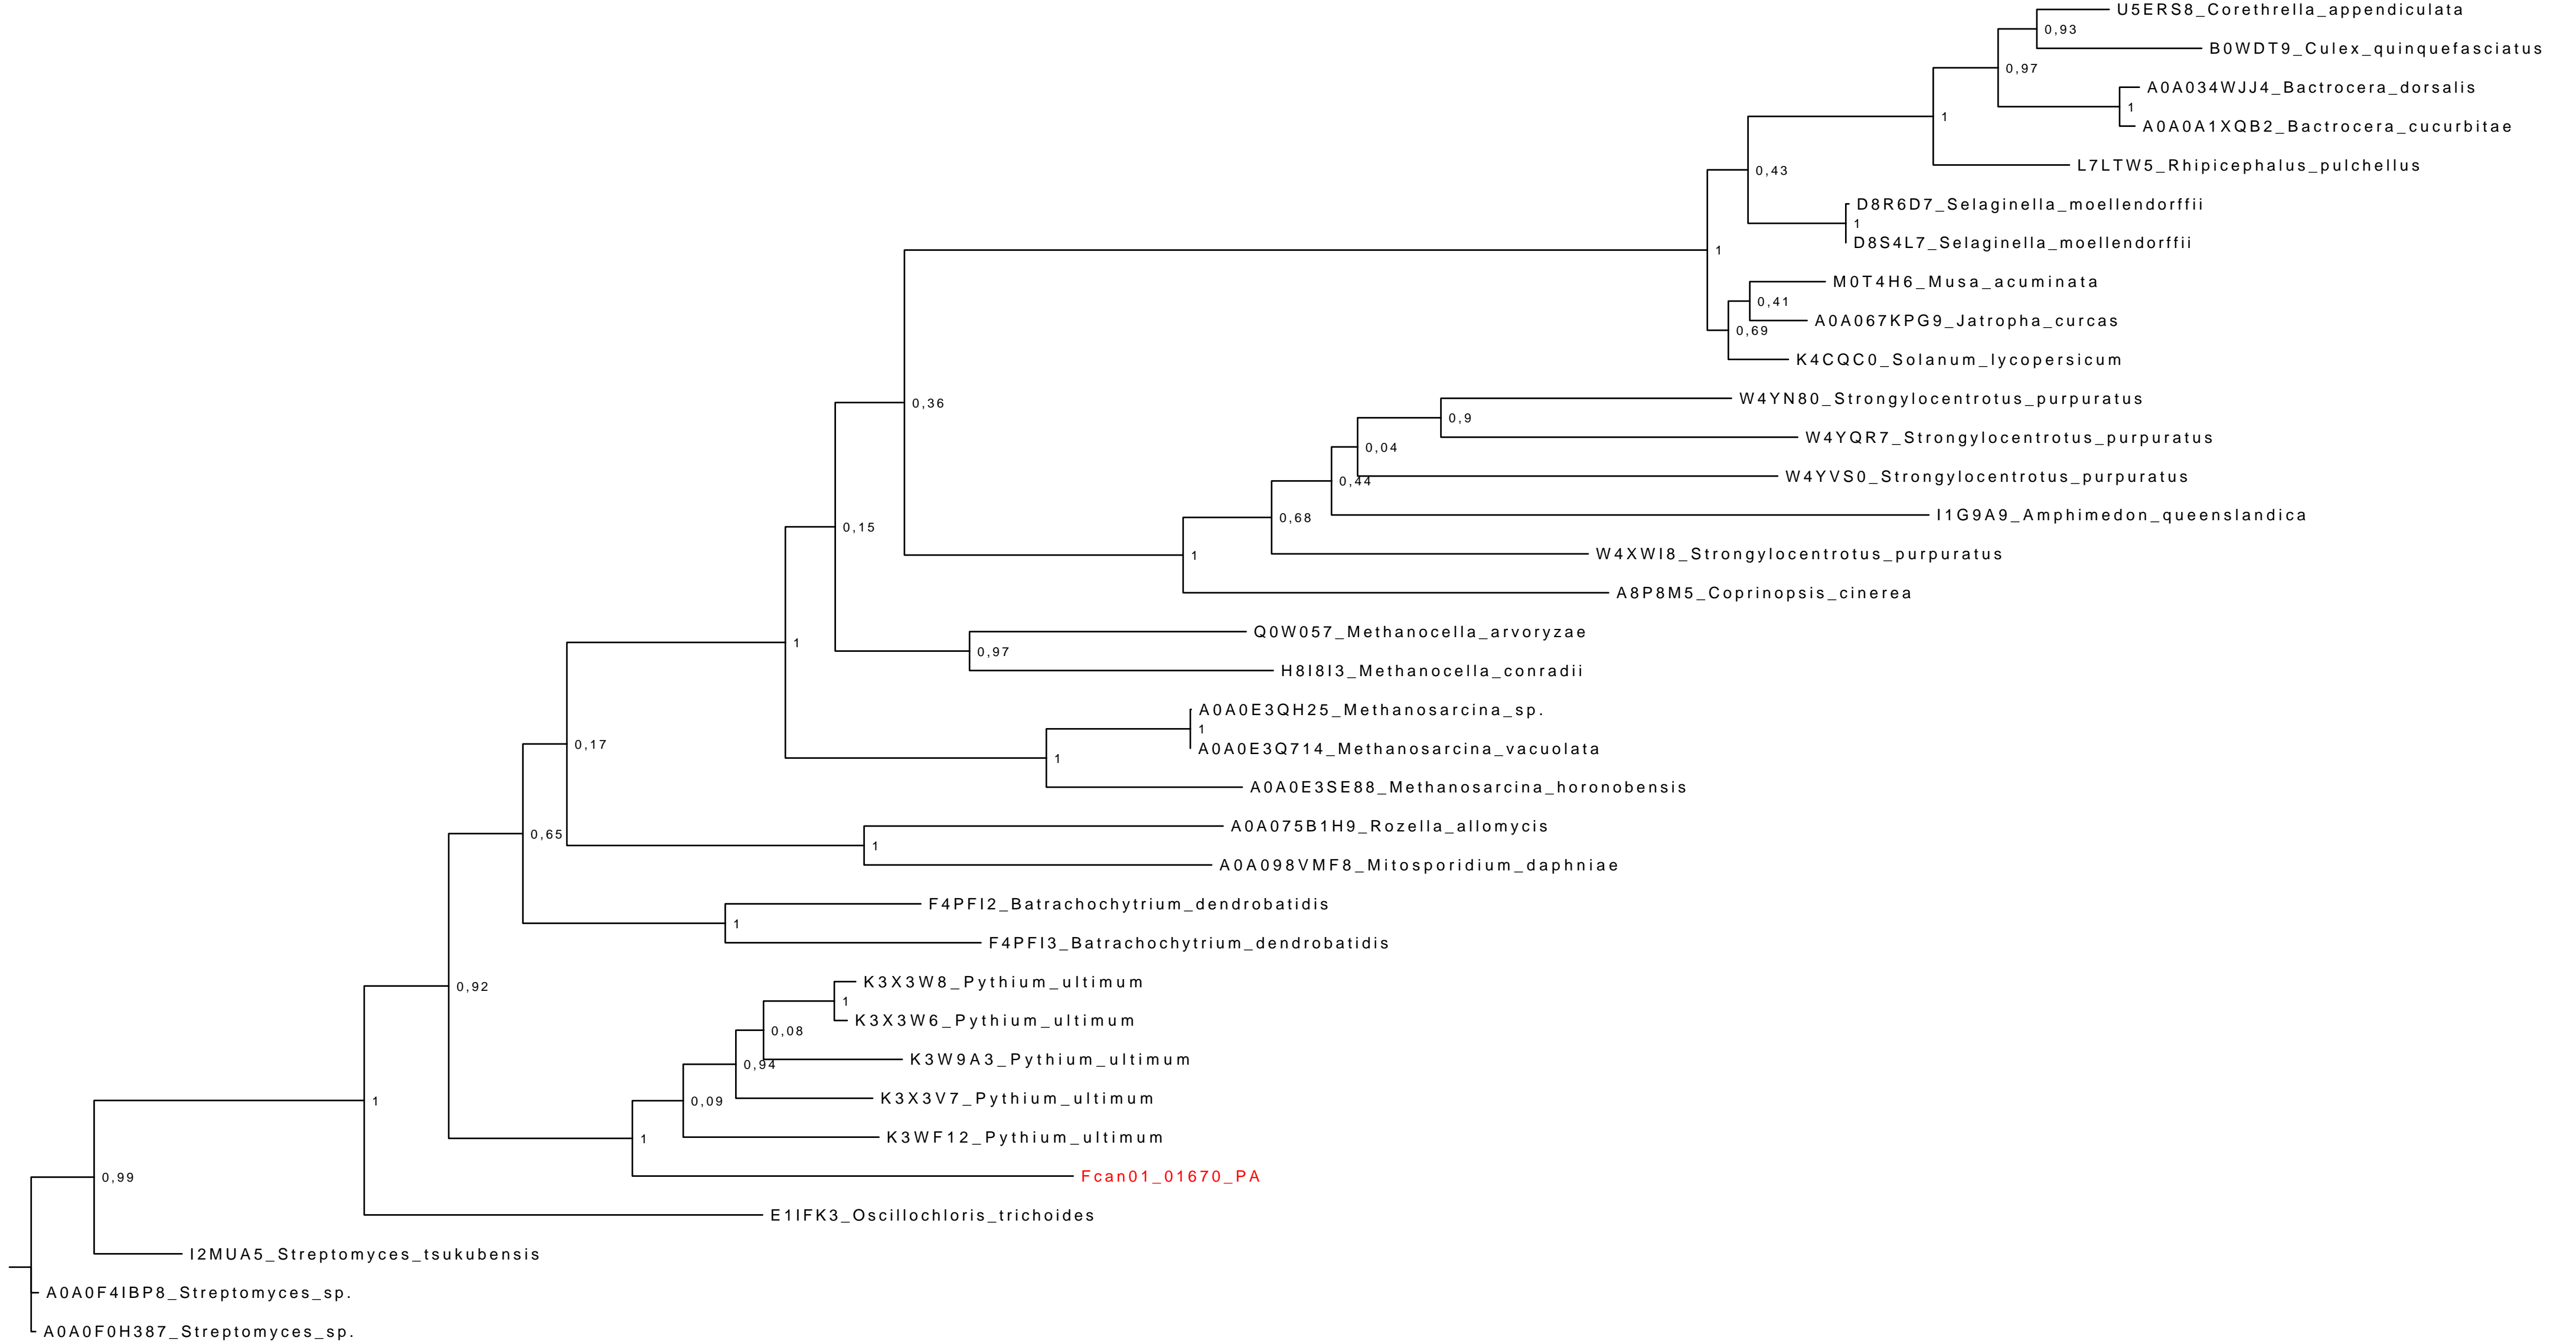

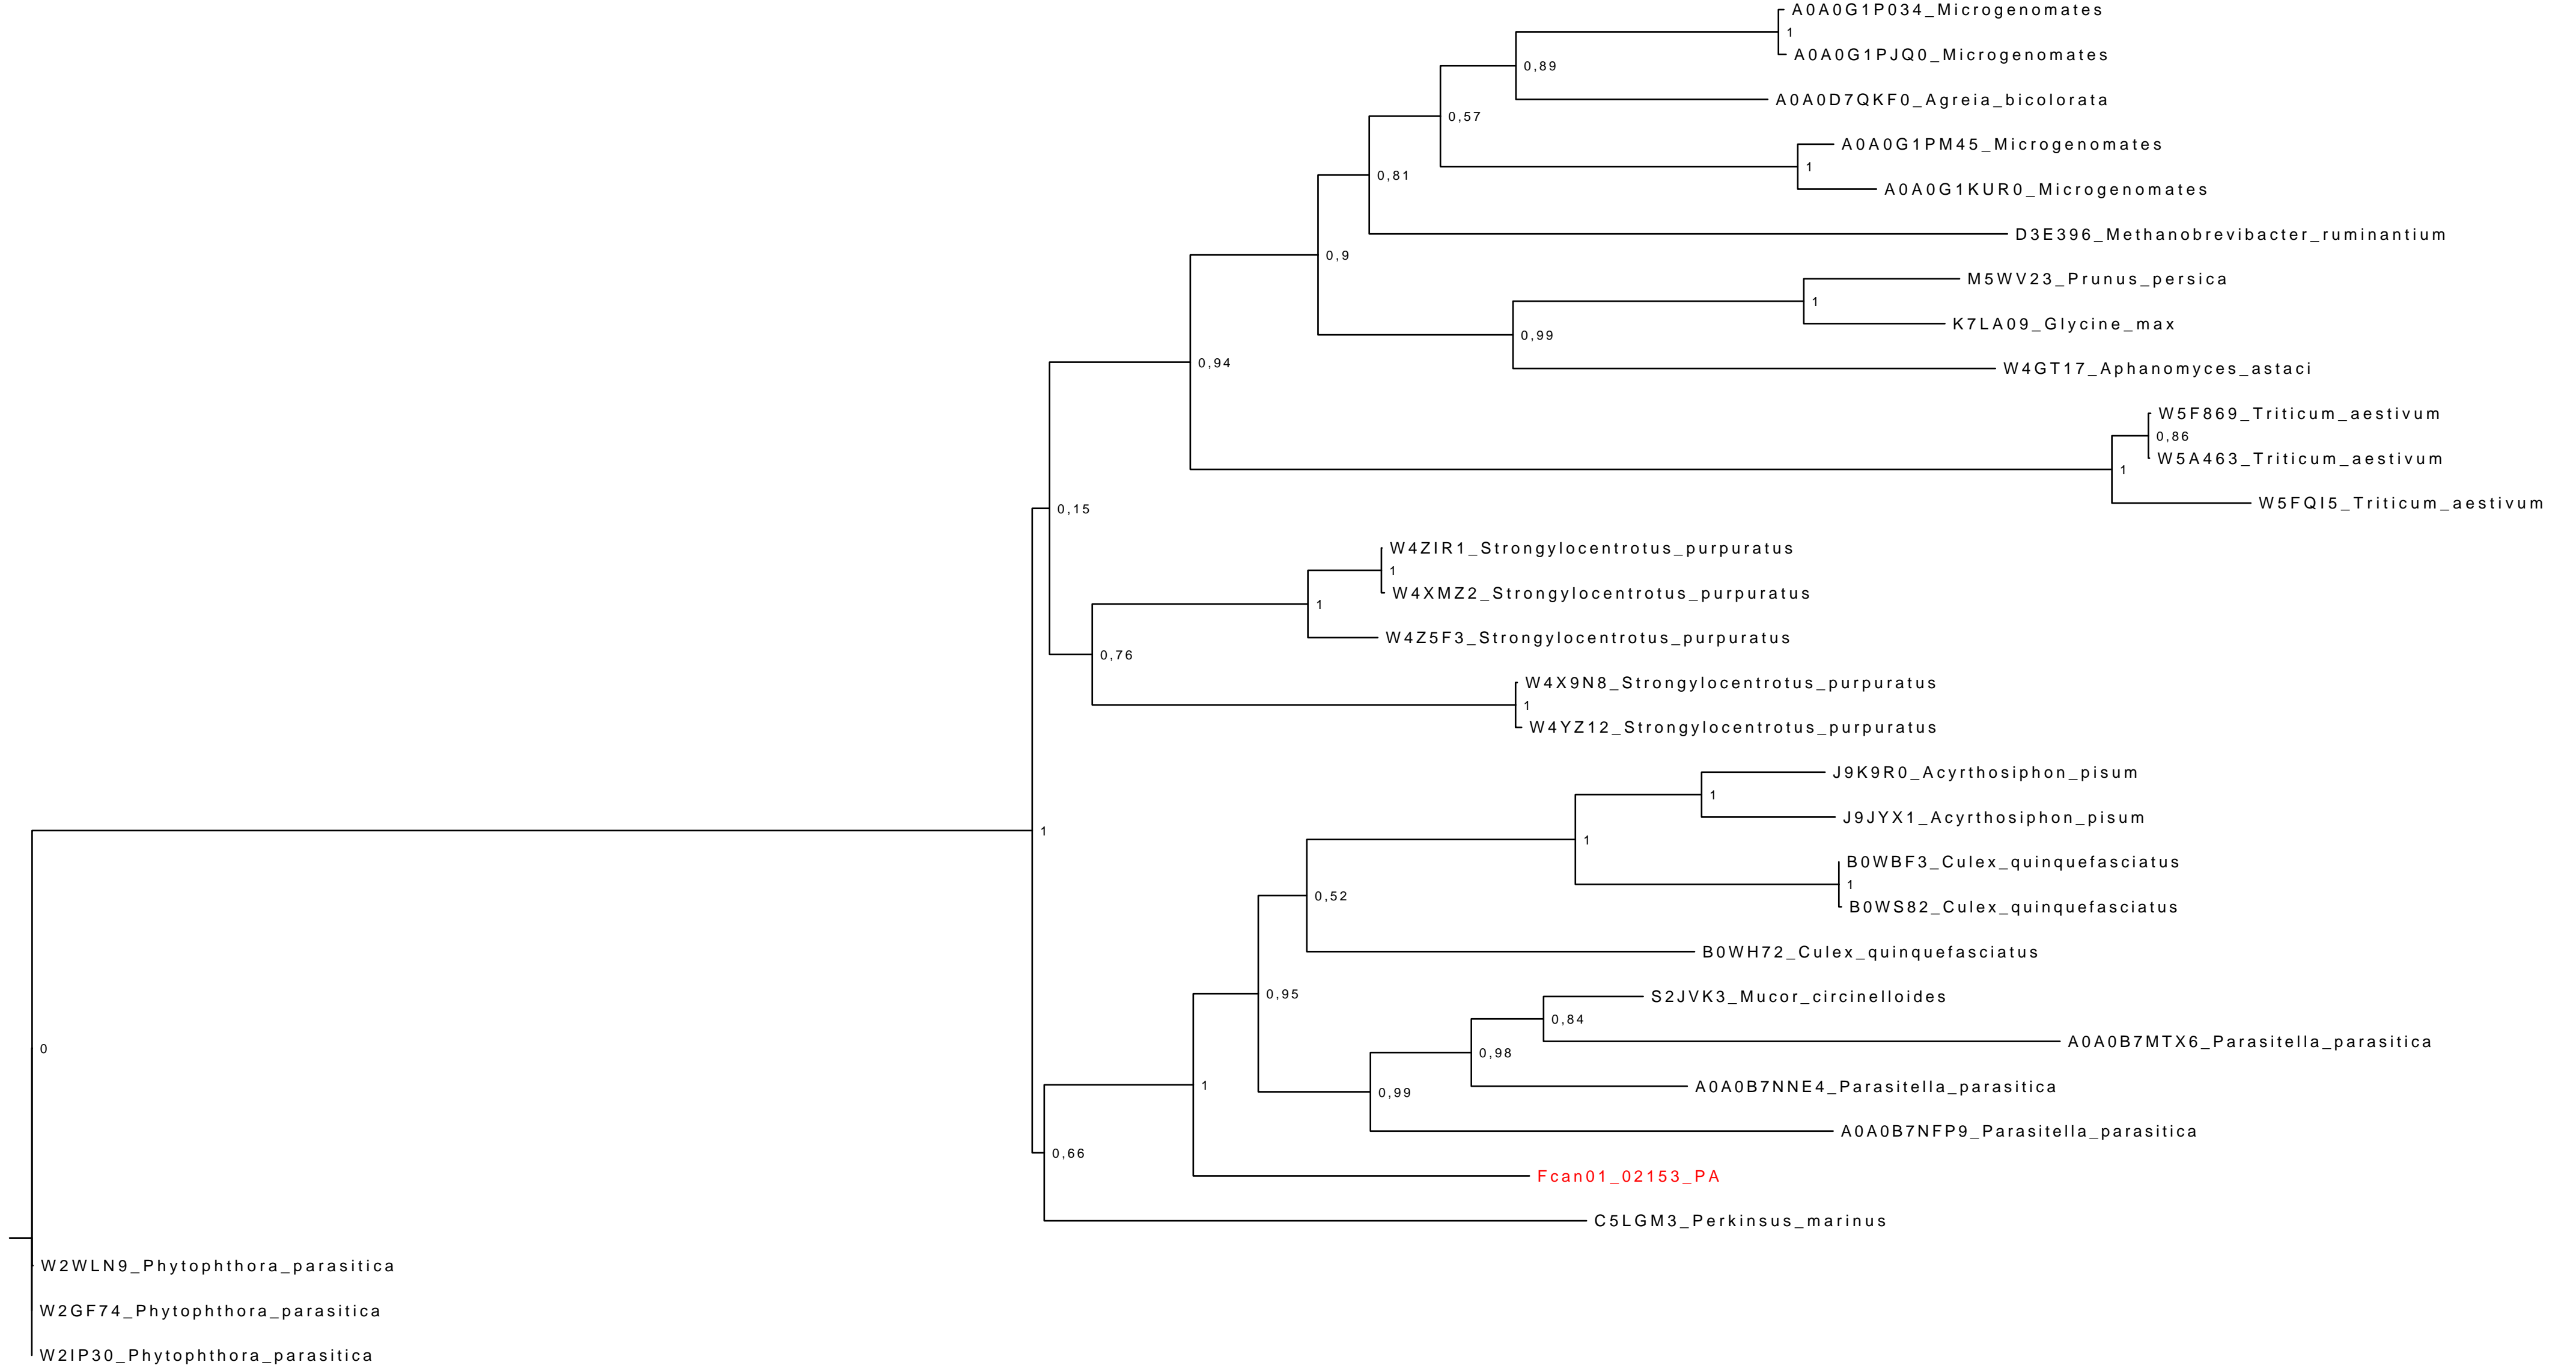



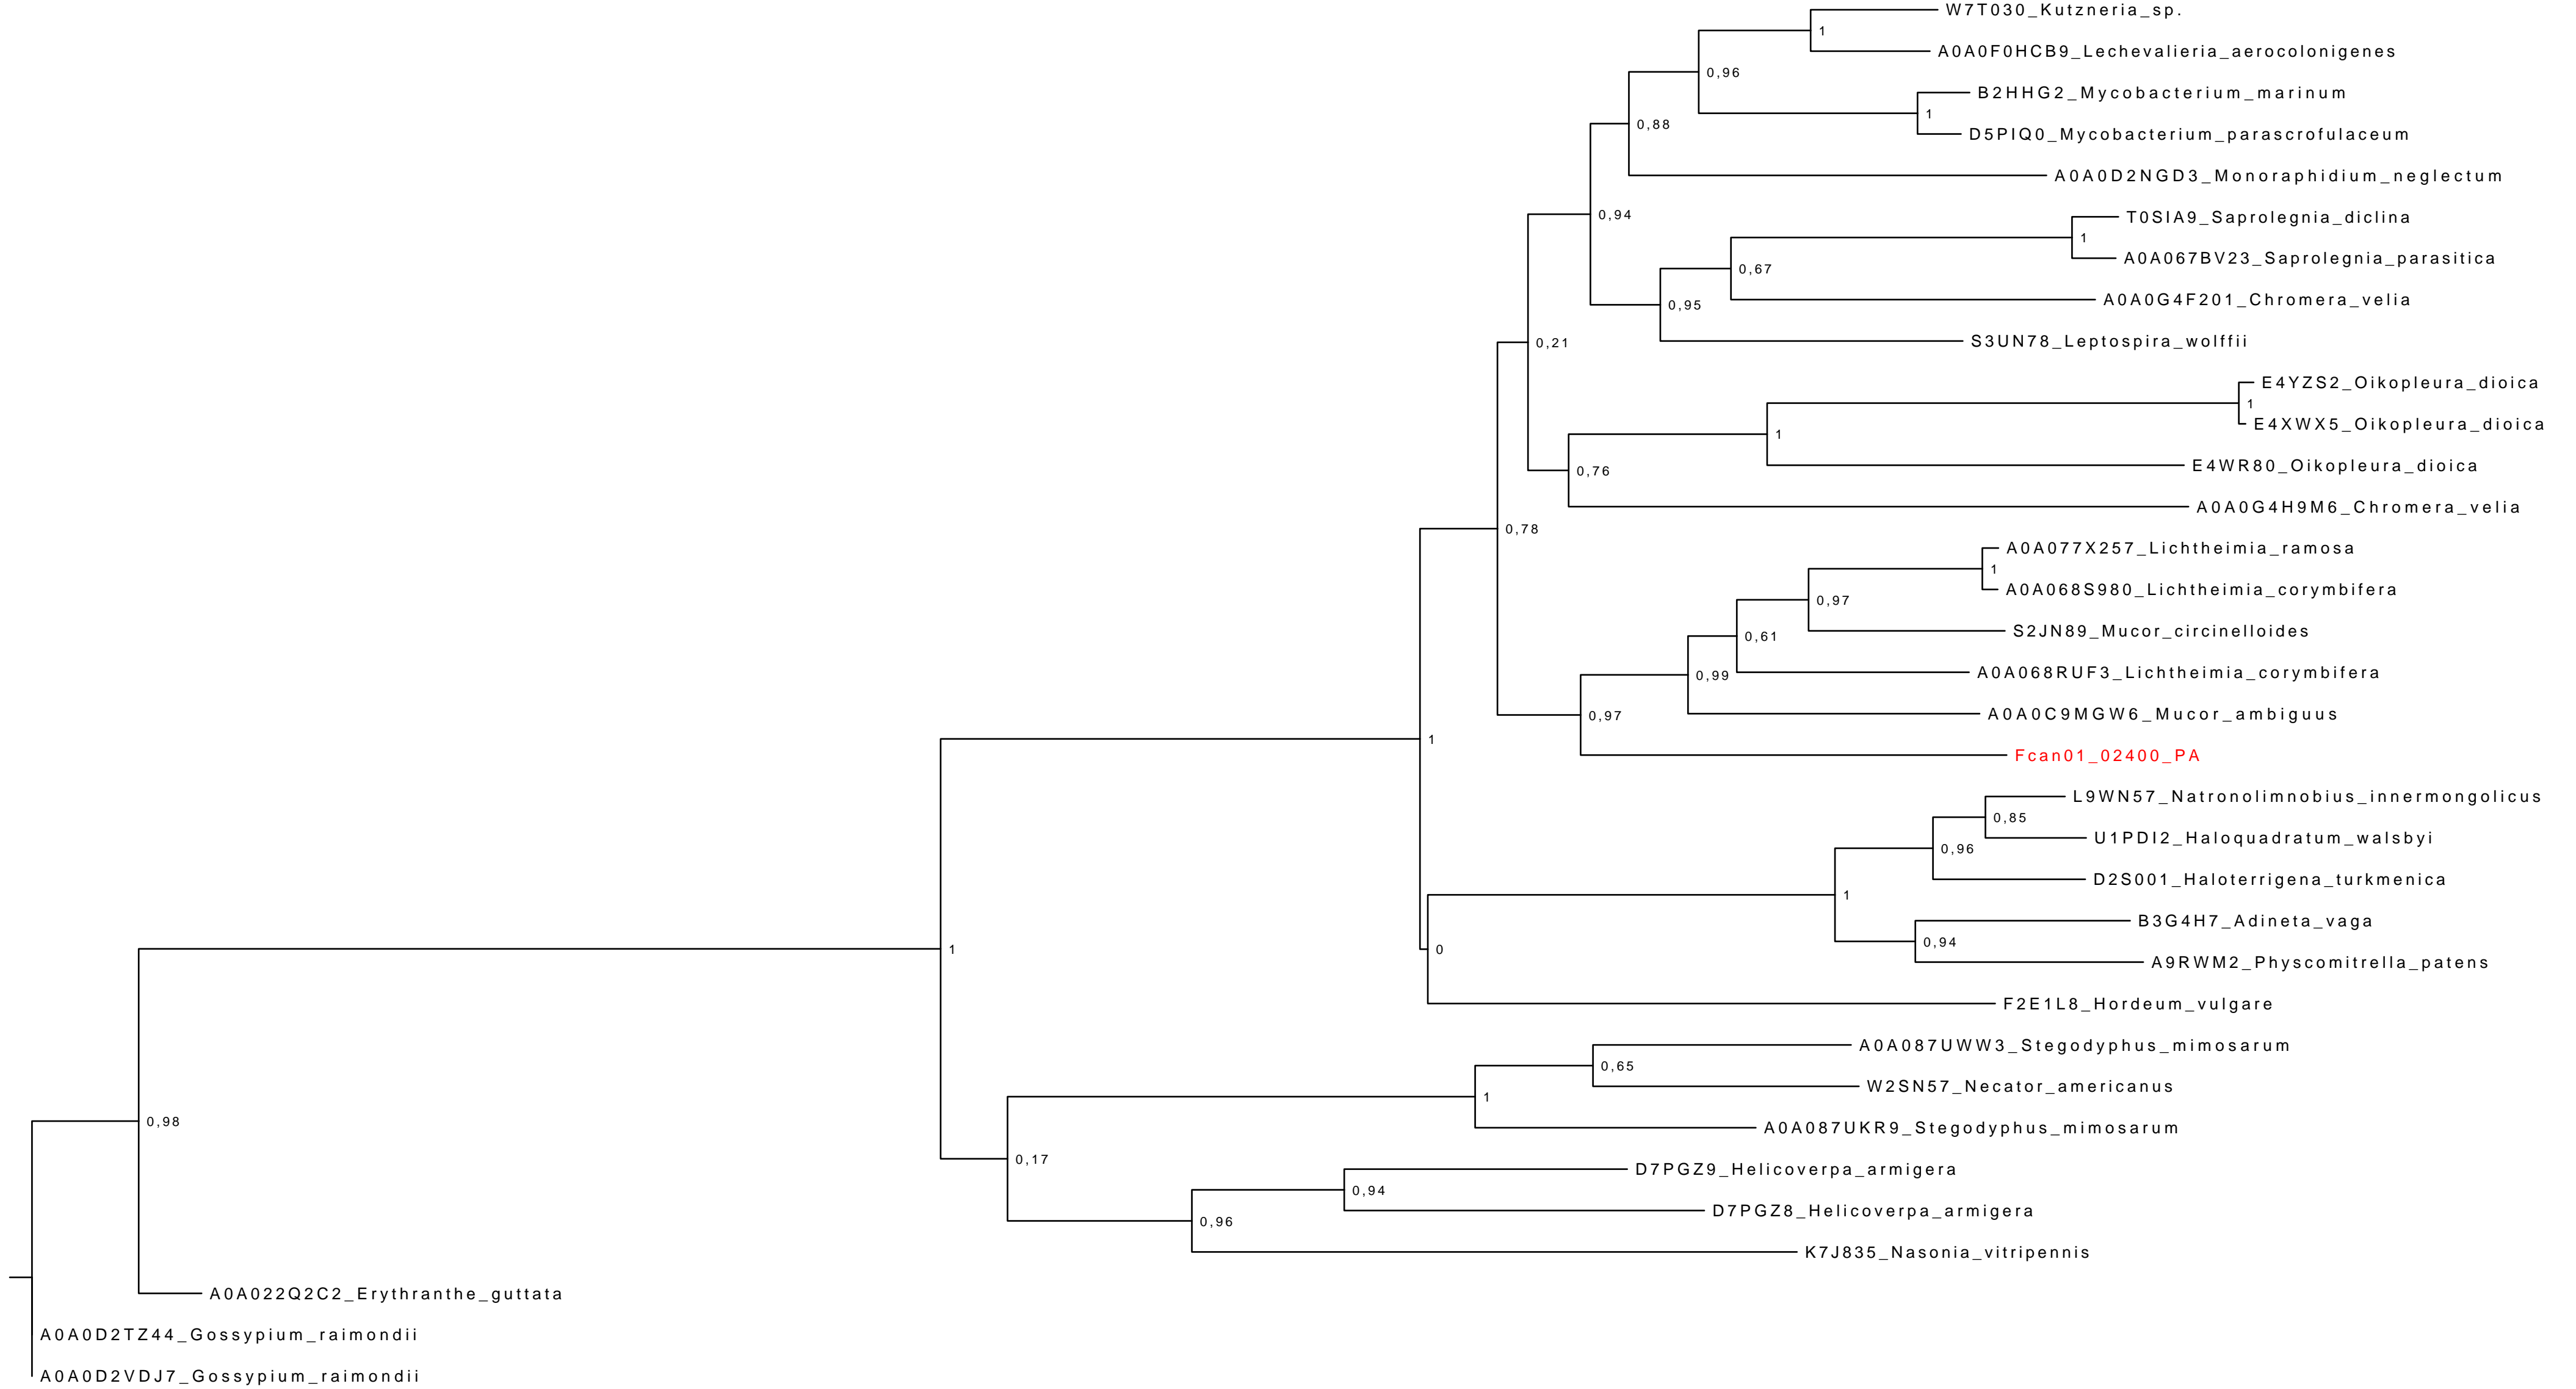

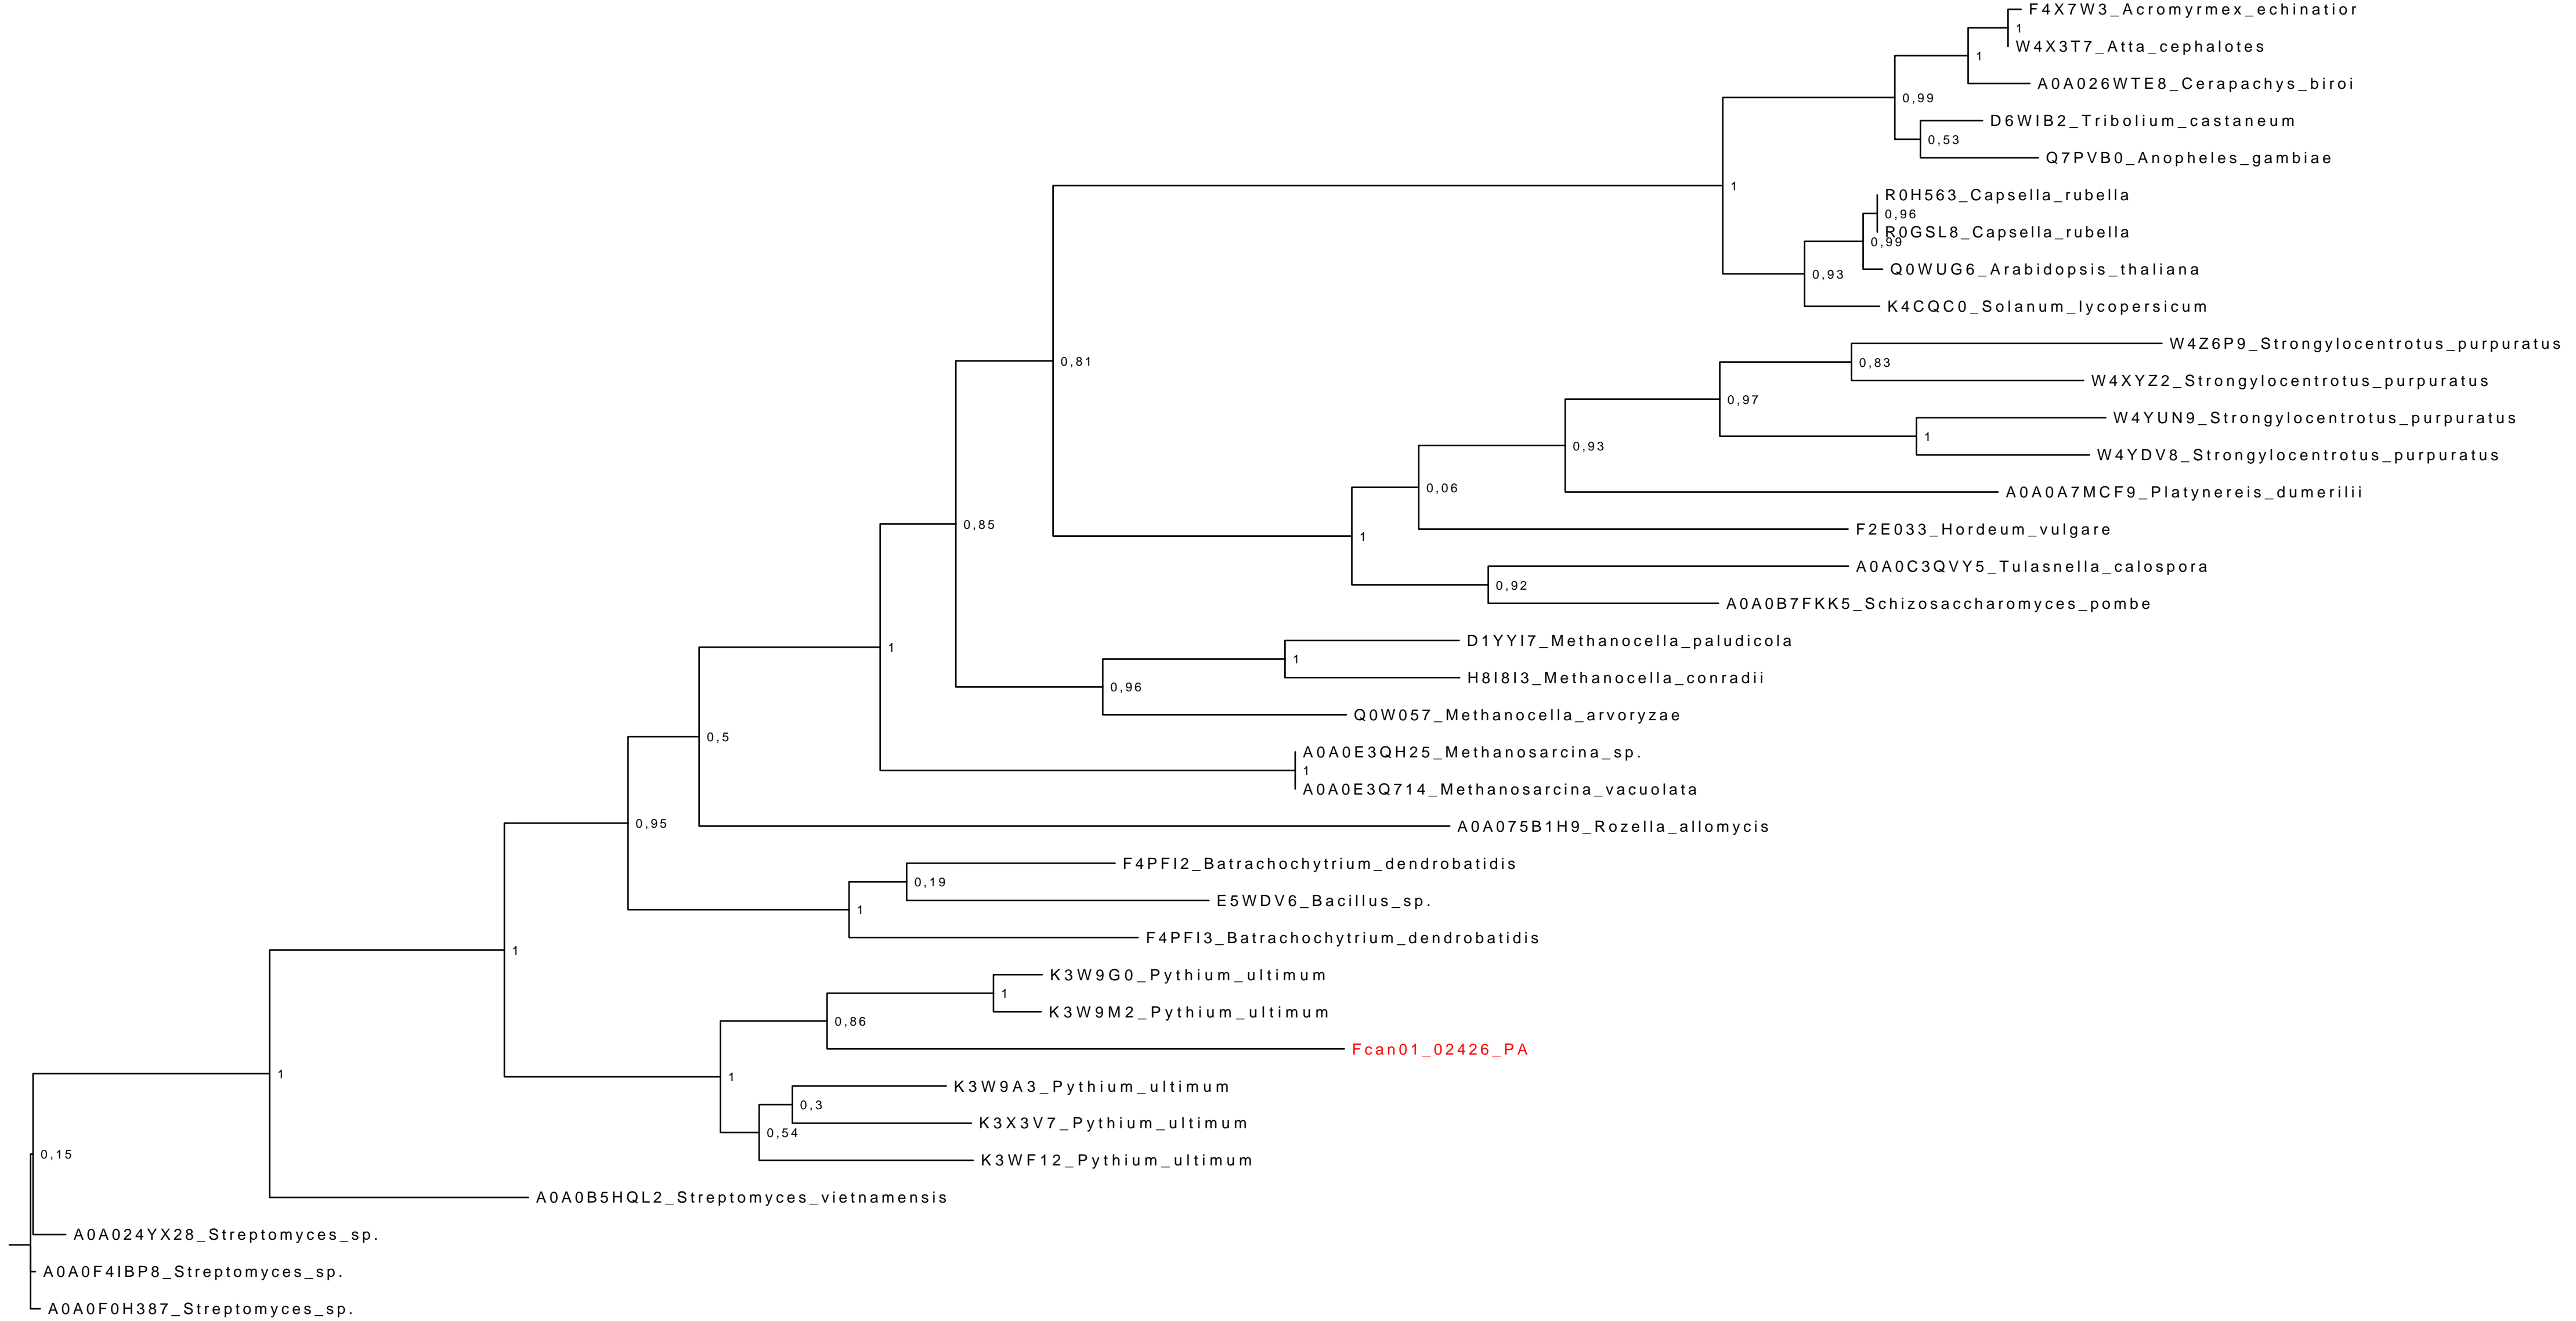

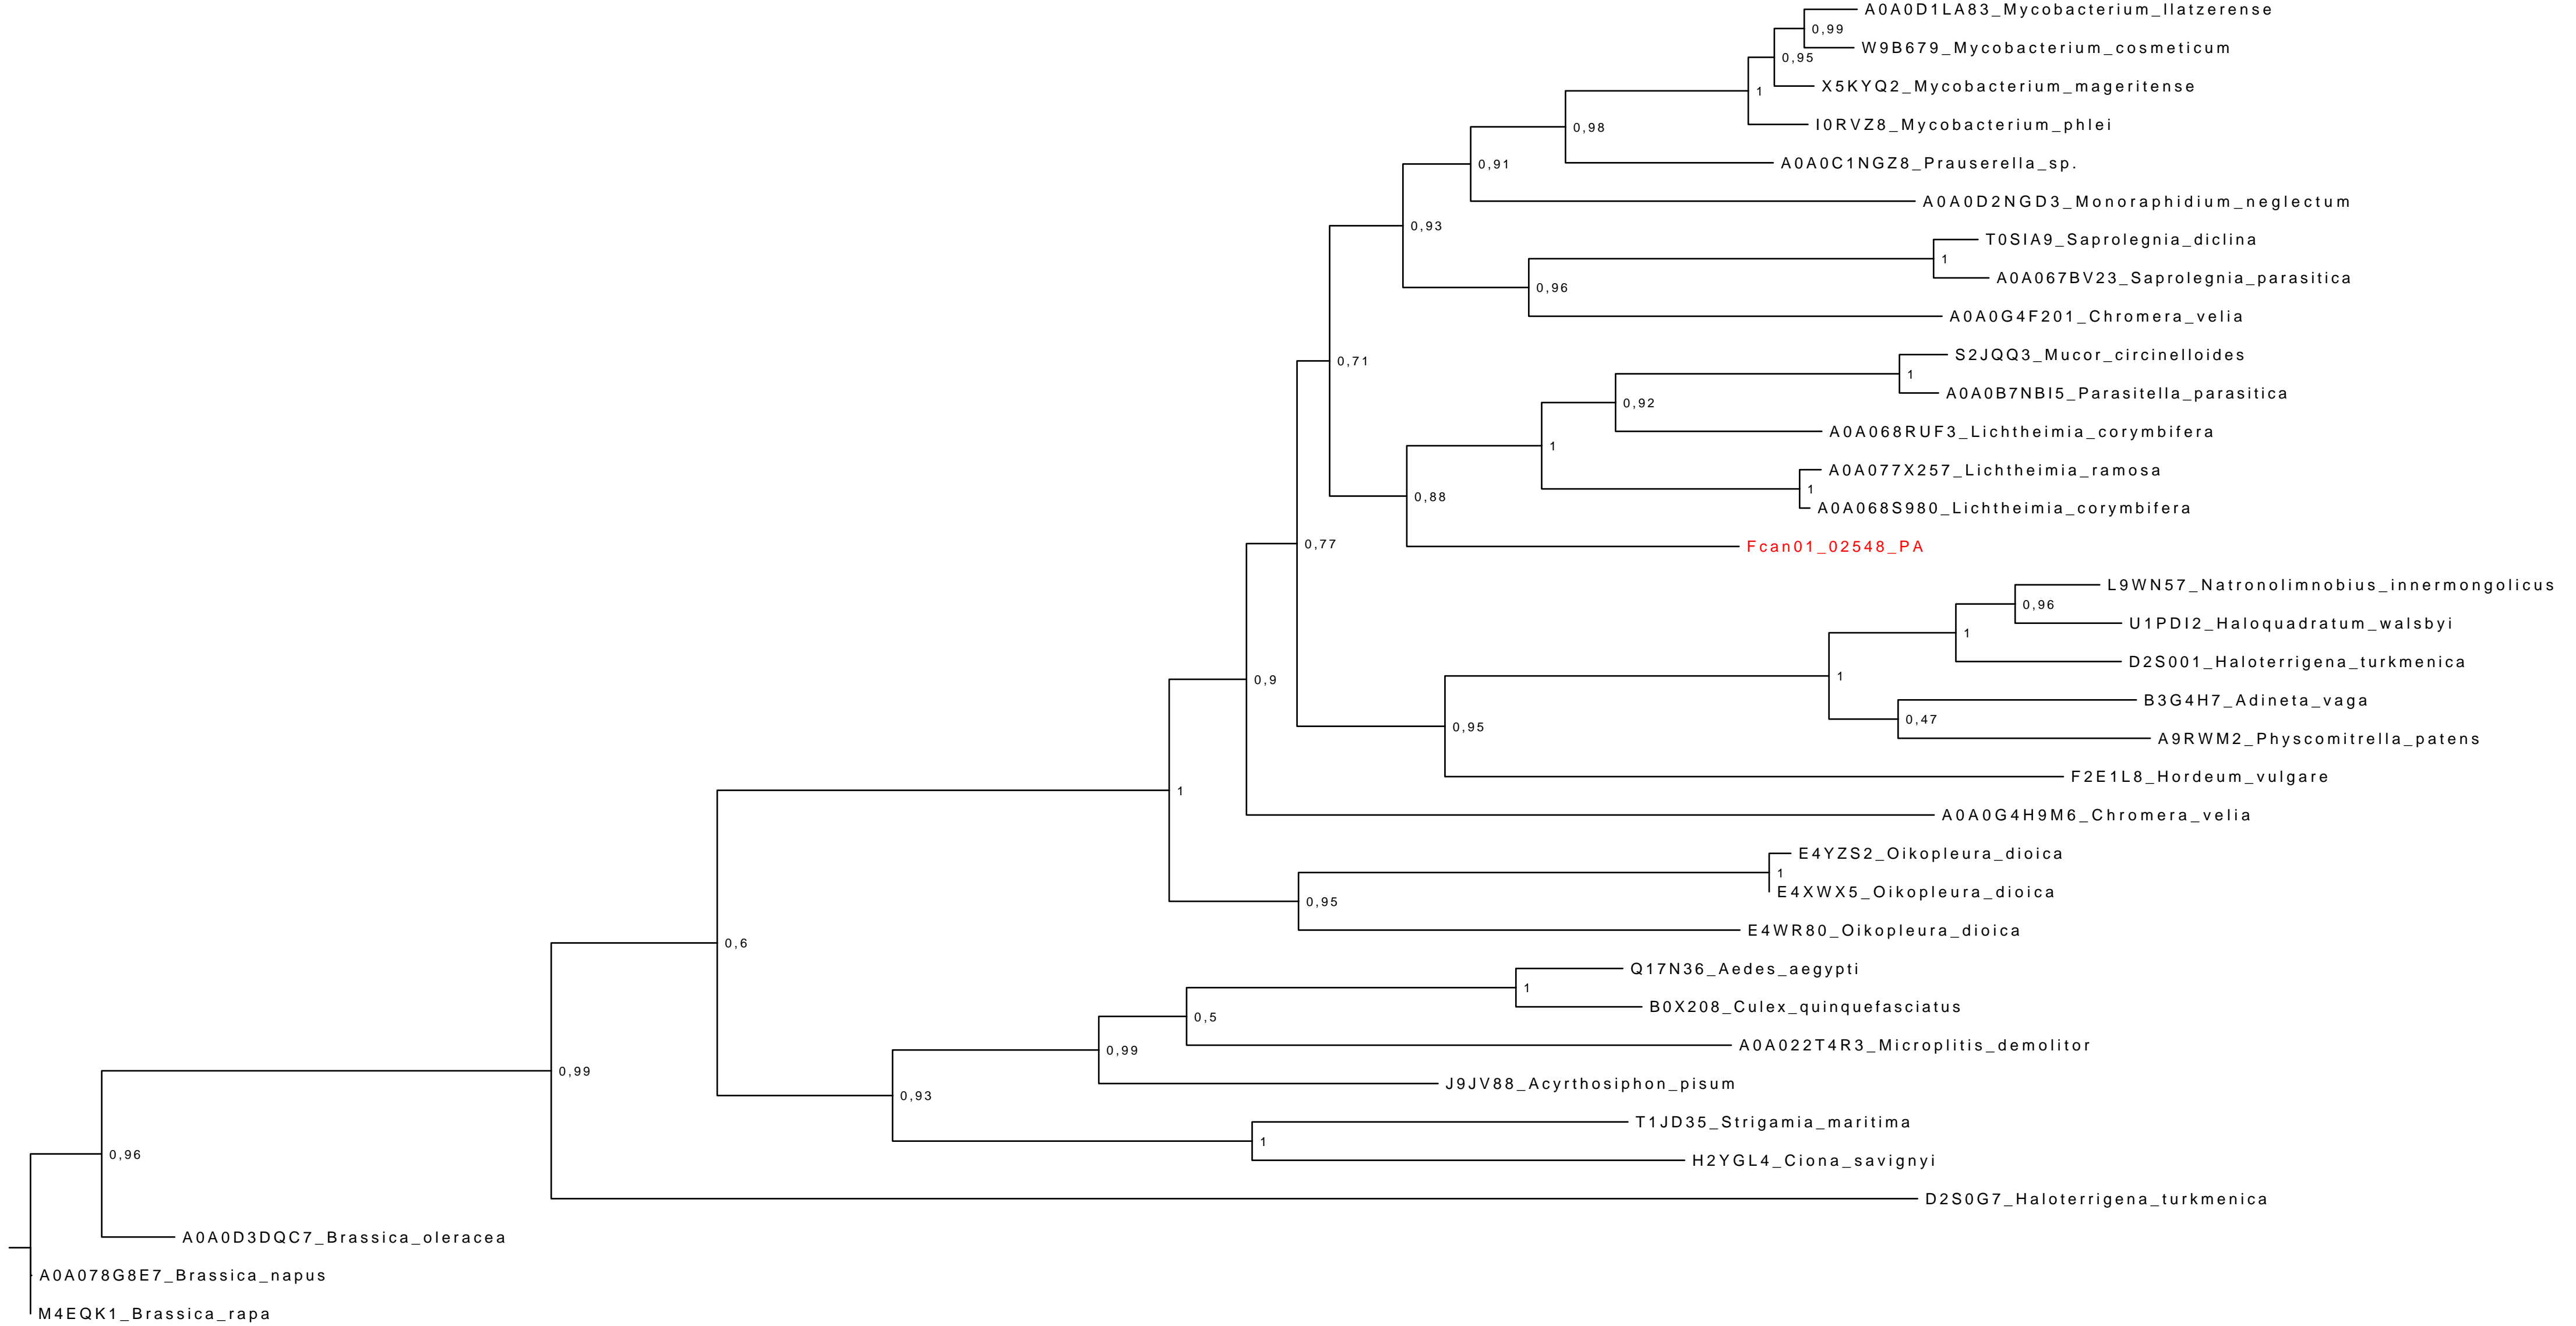

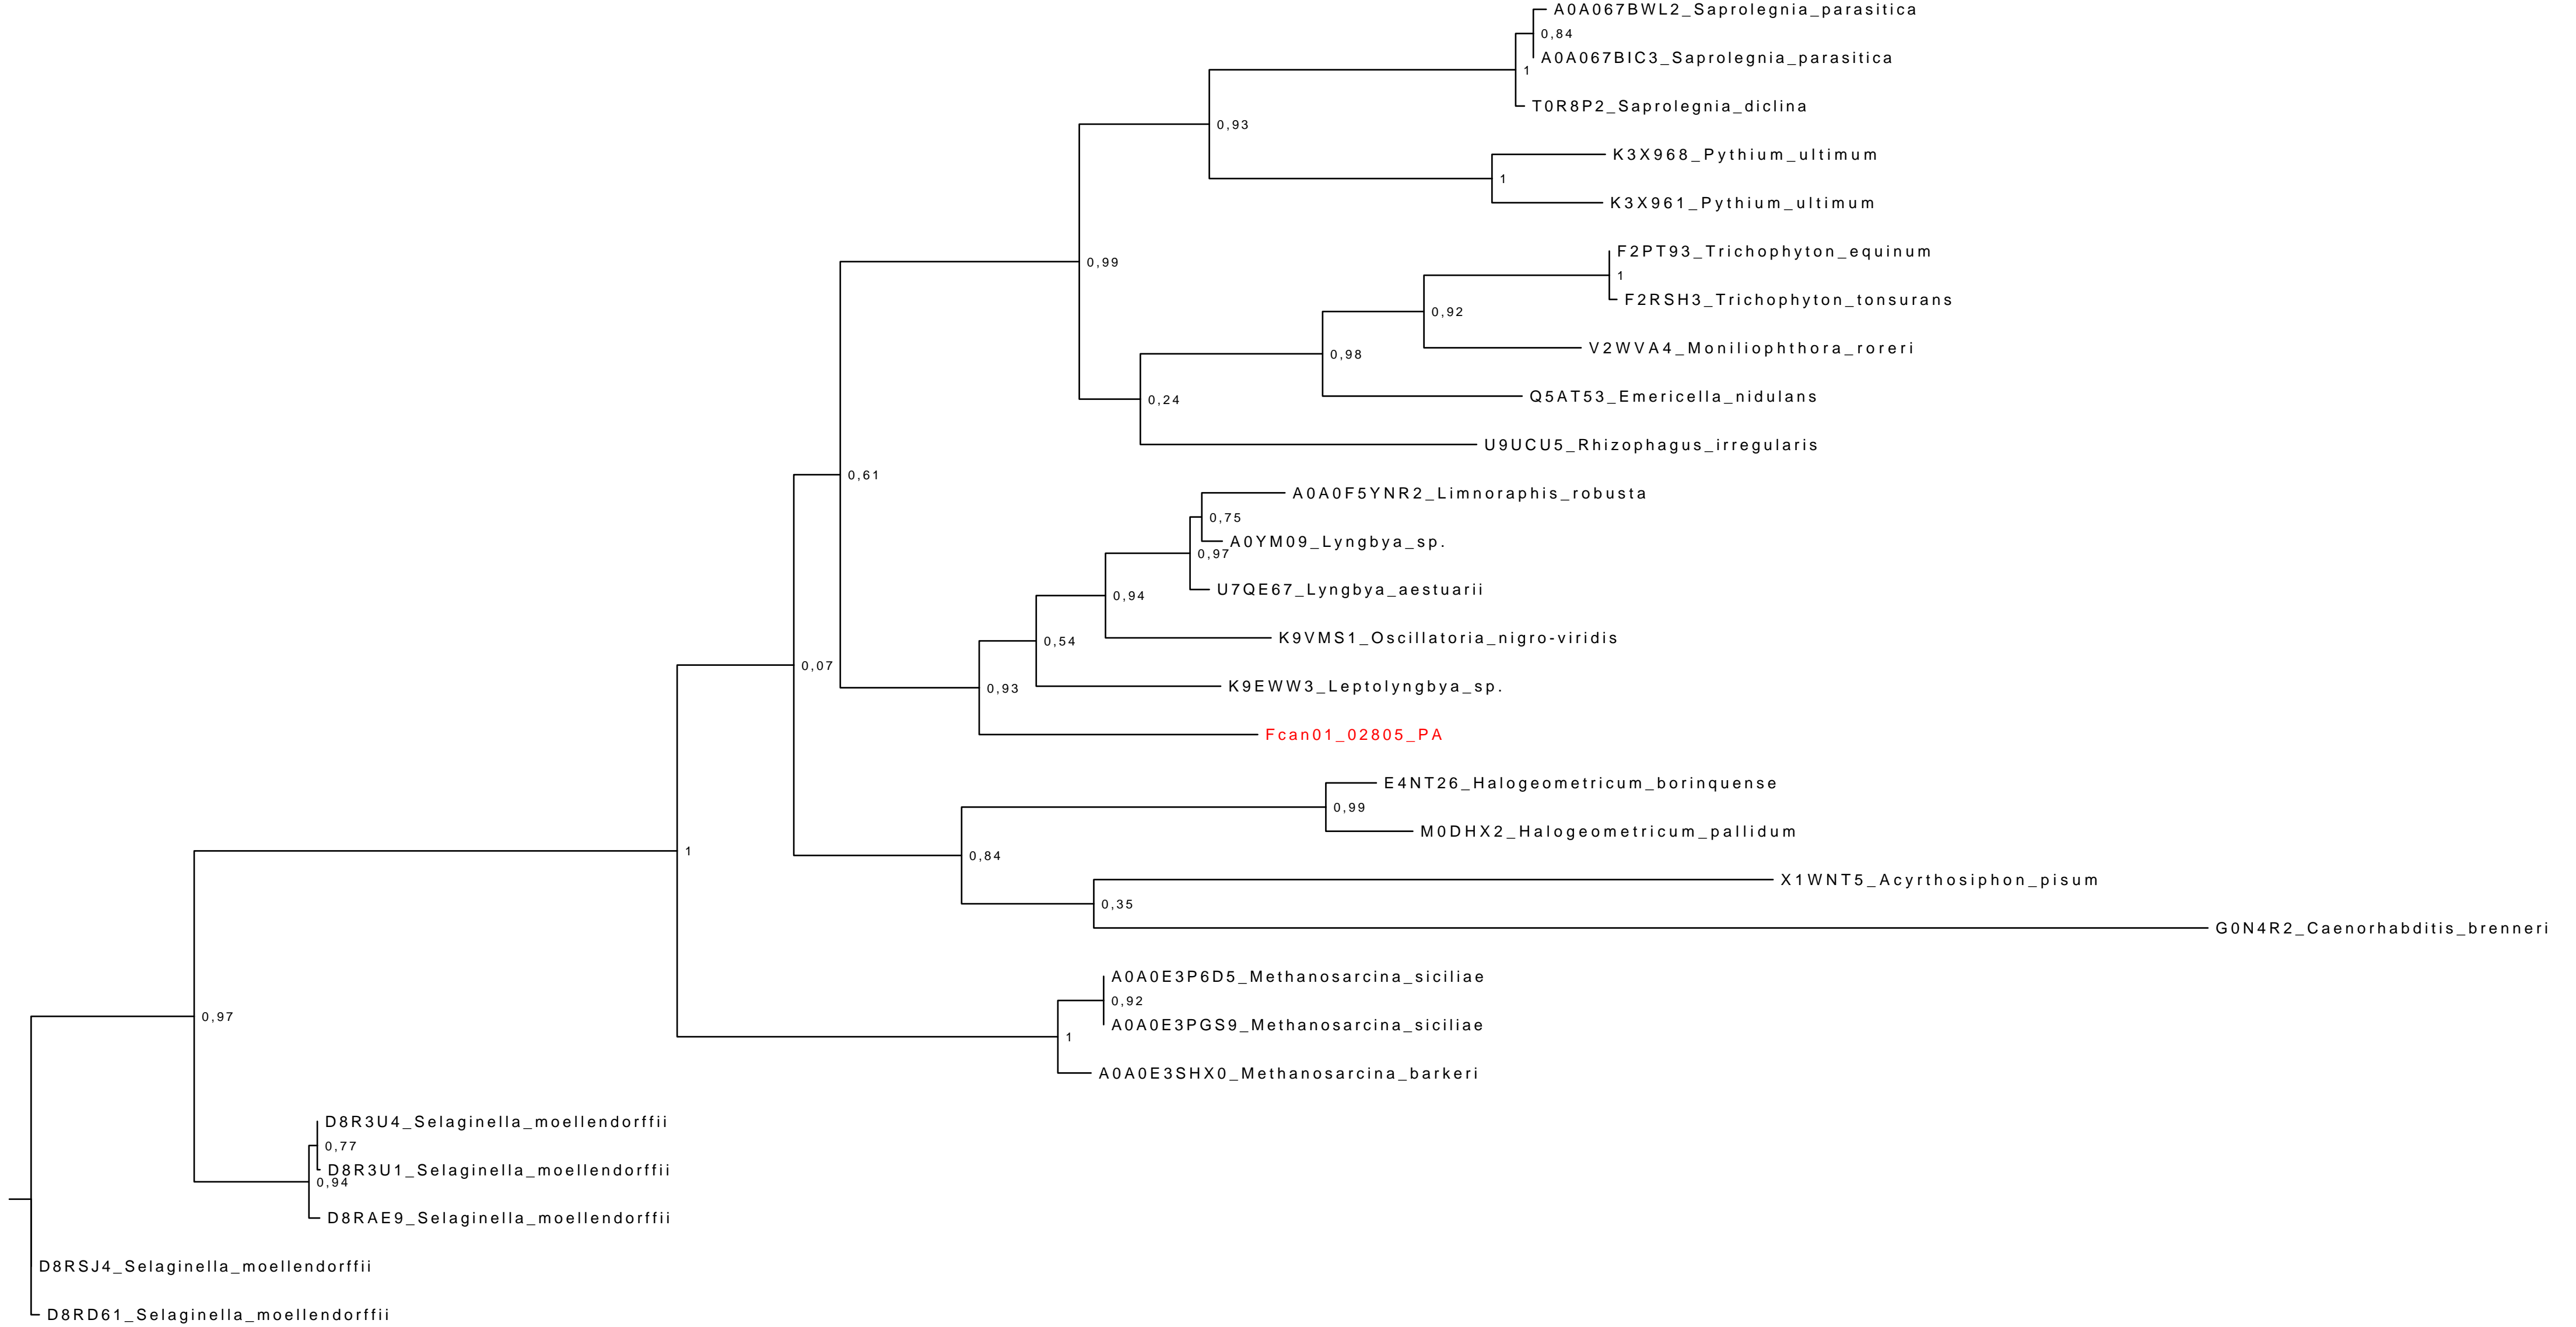

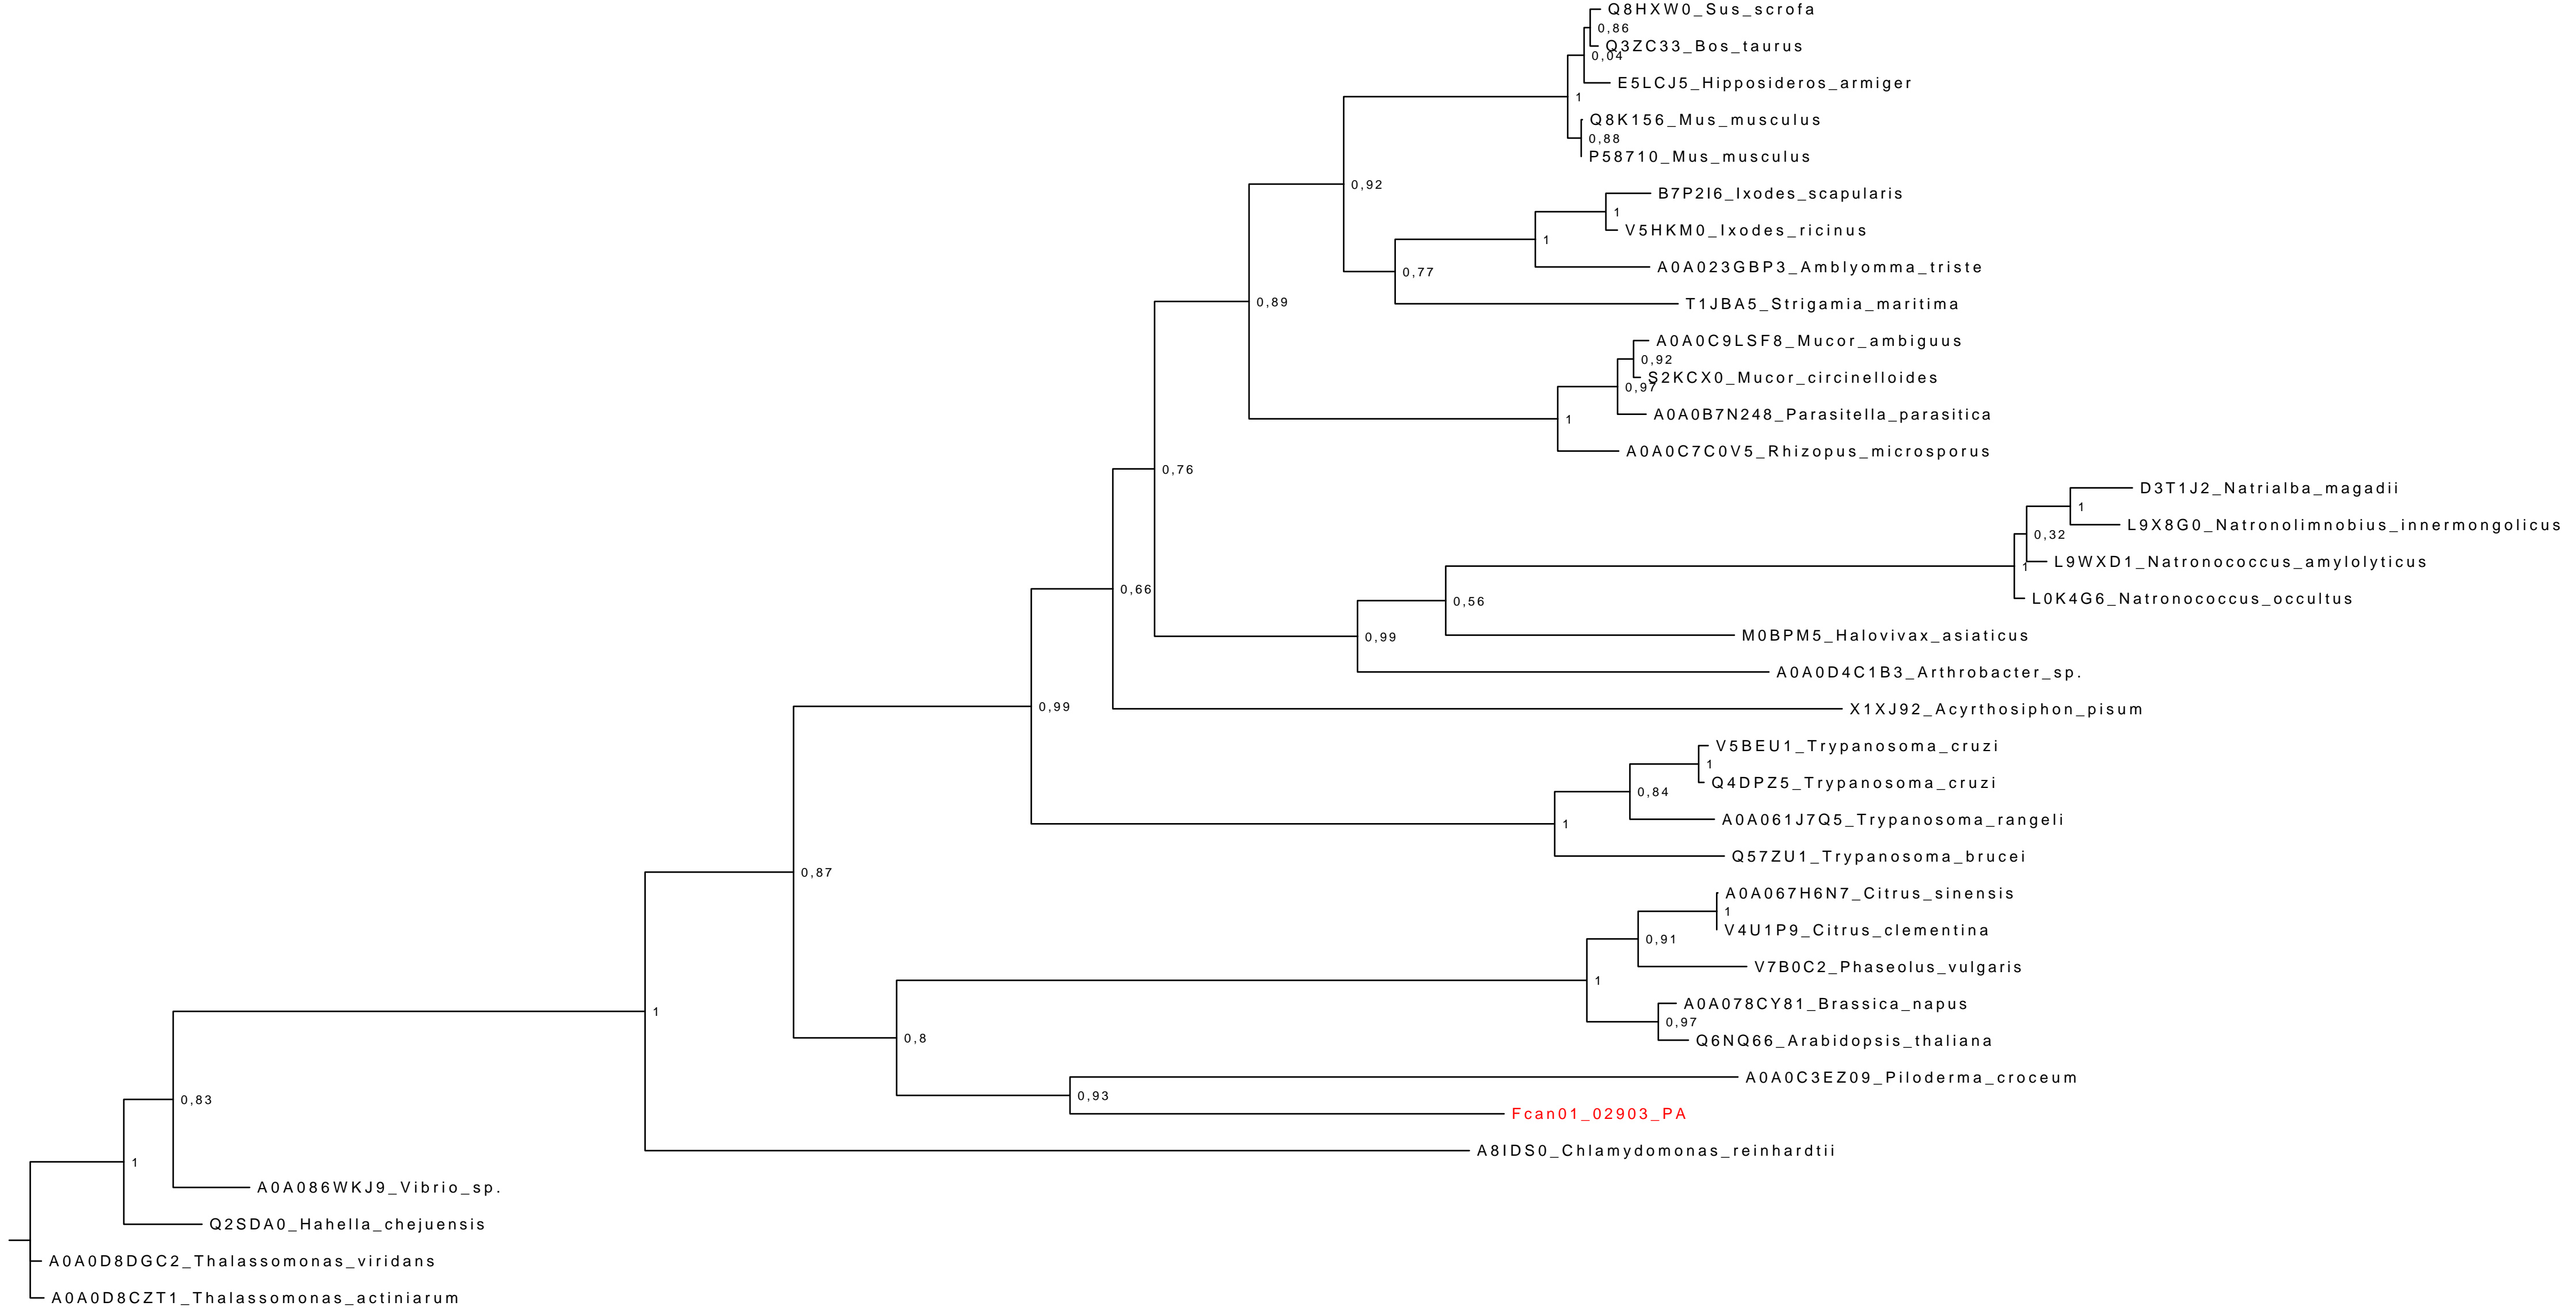

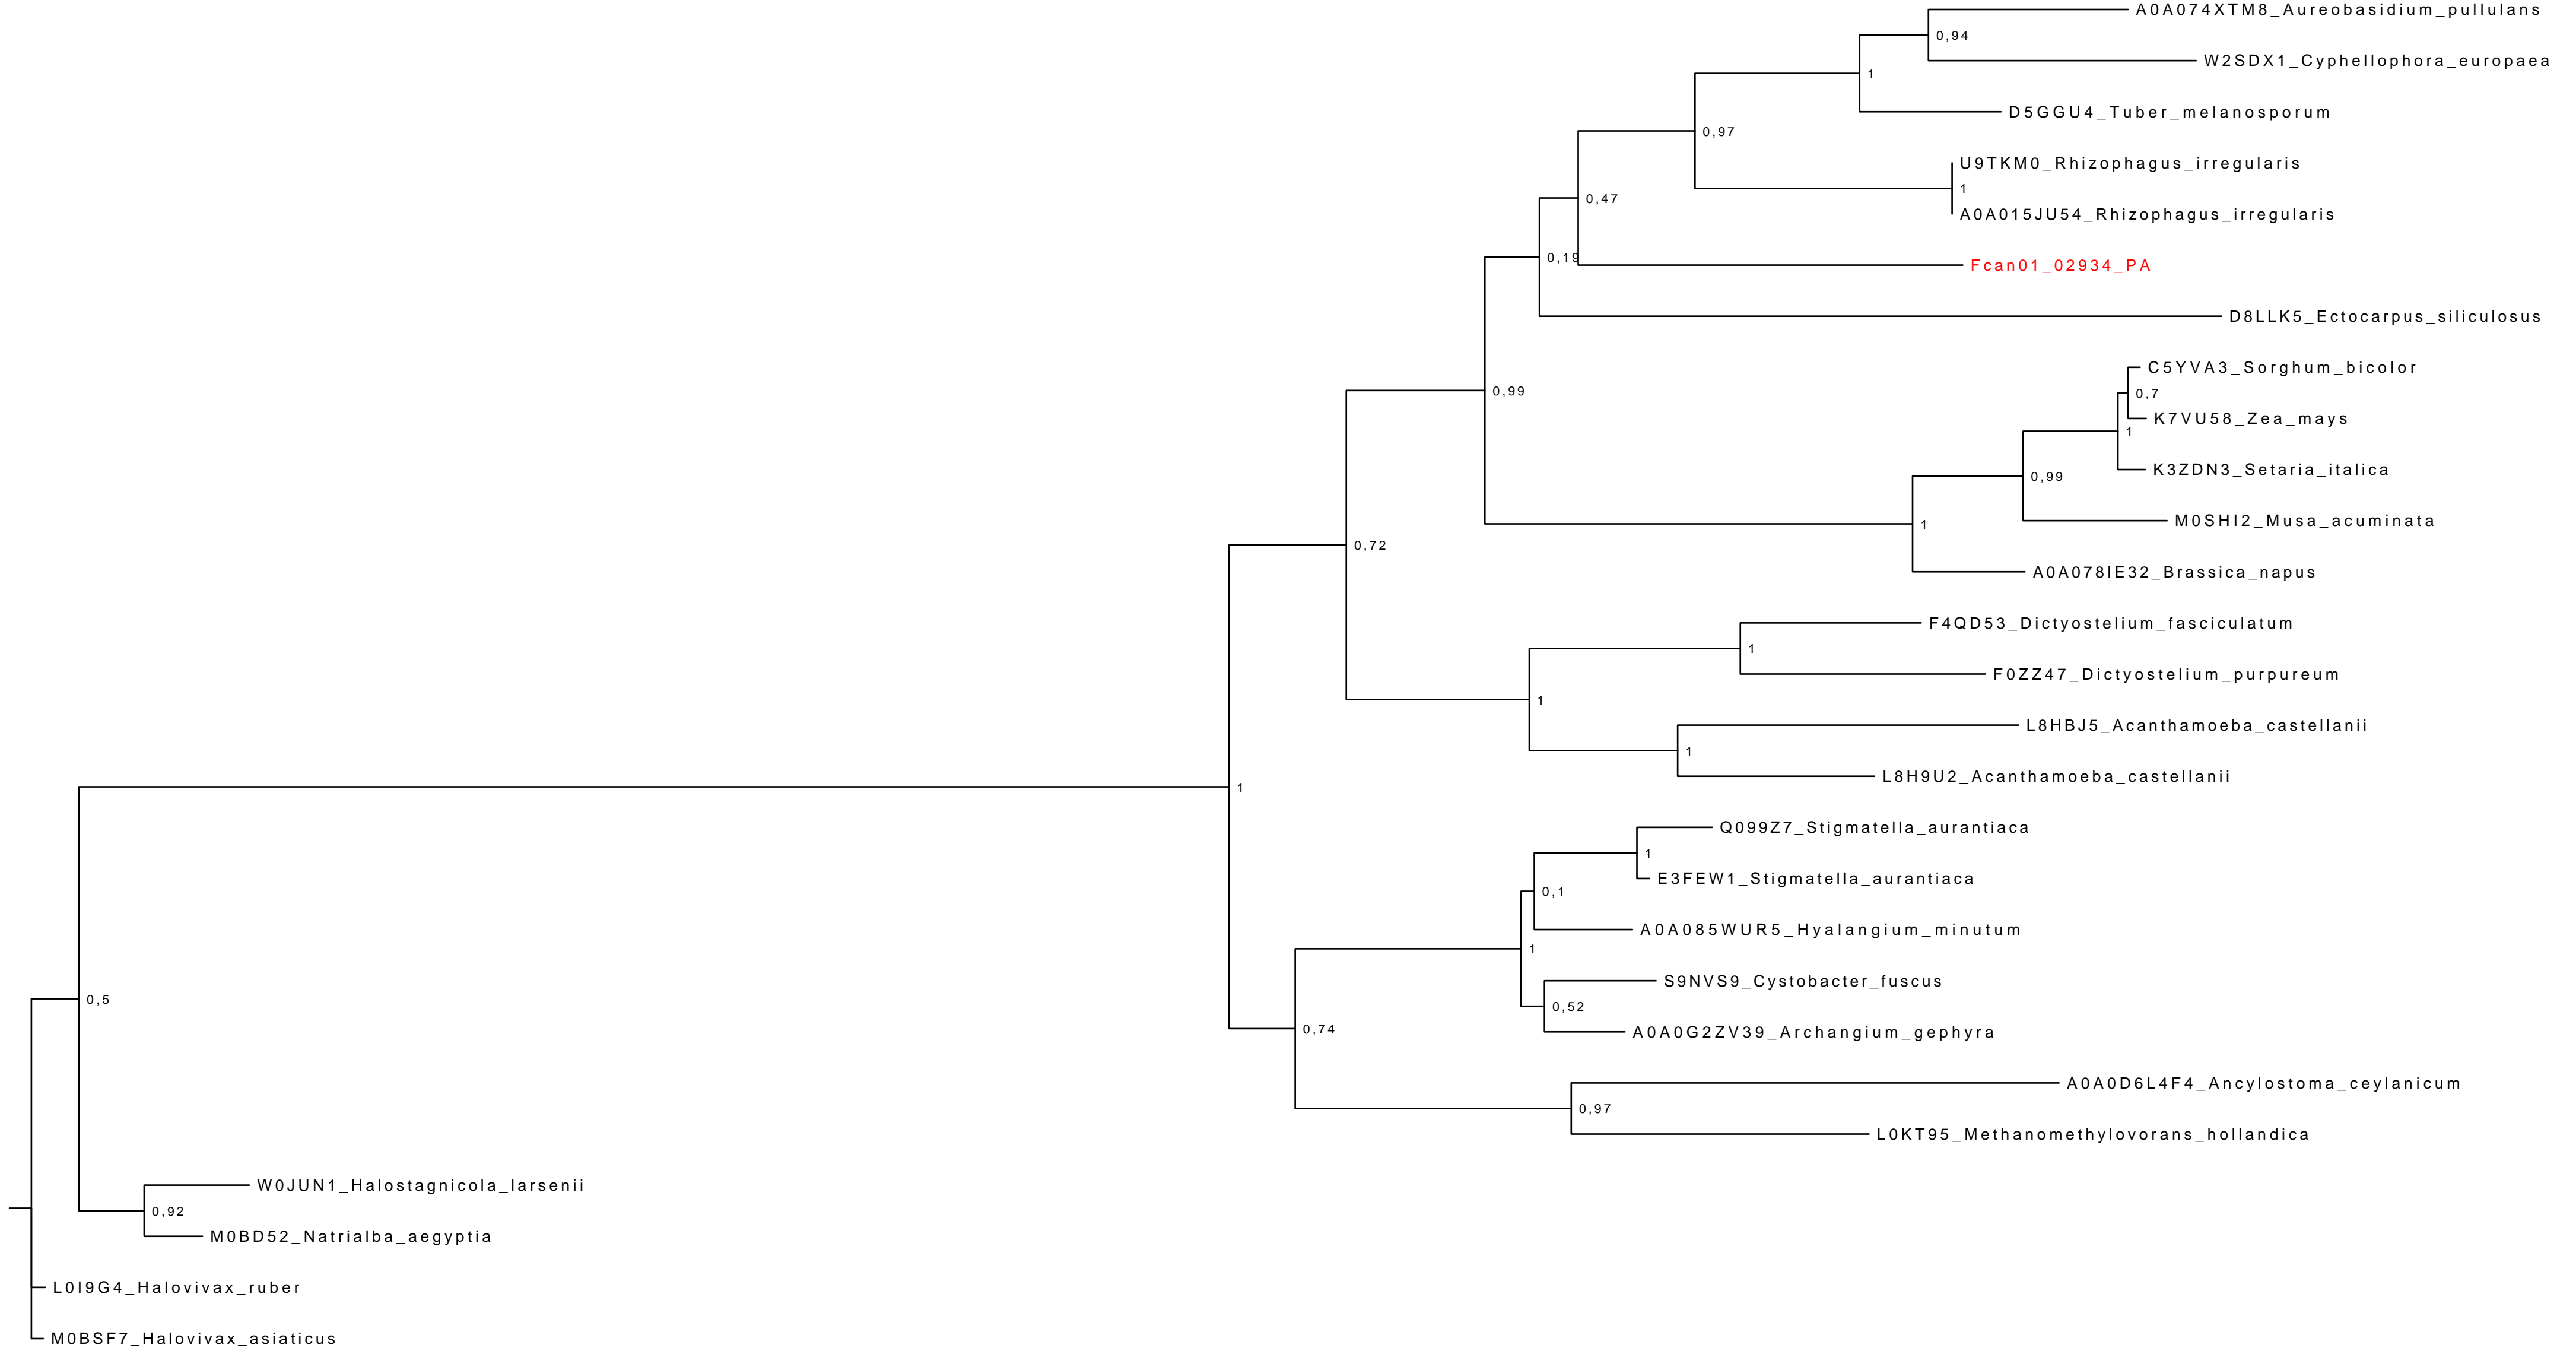

0.5

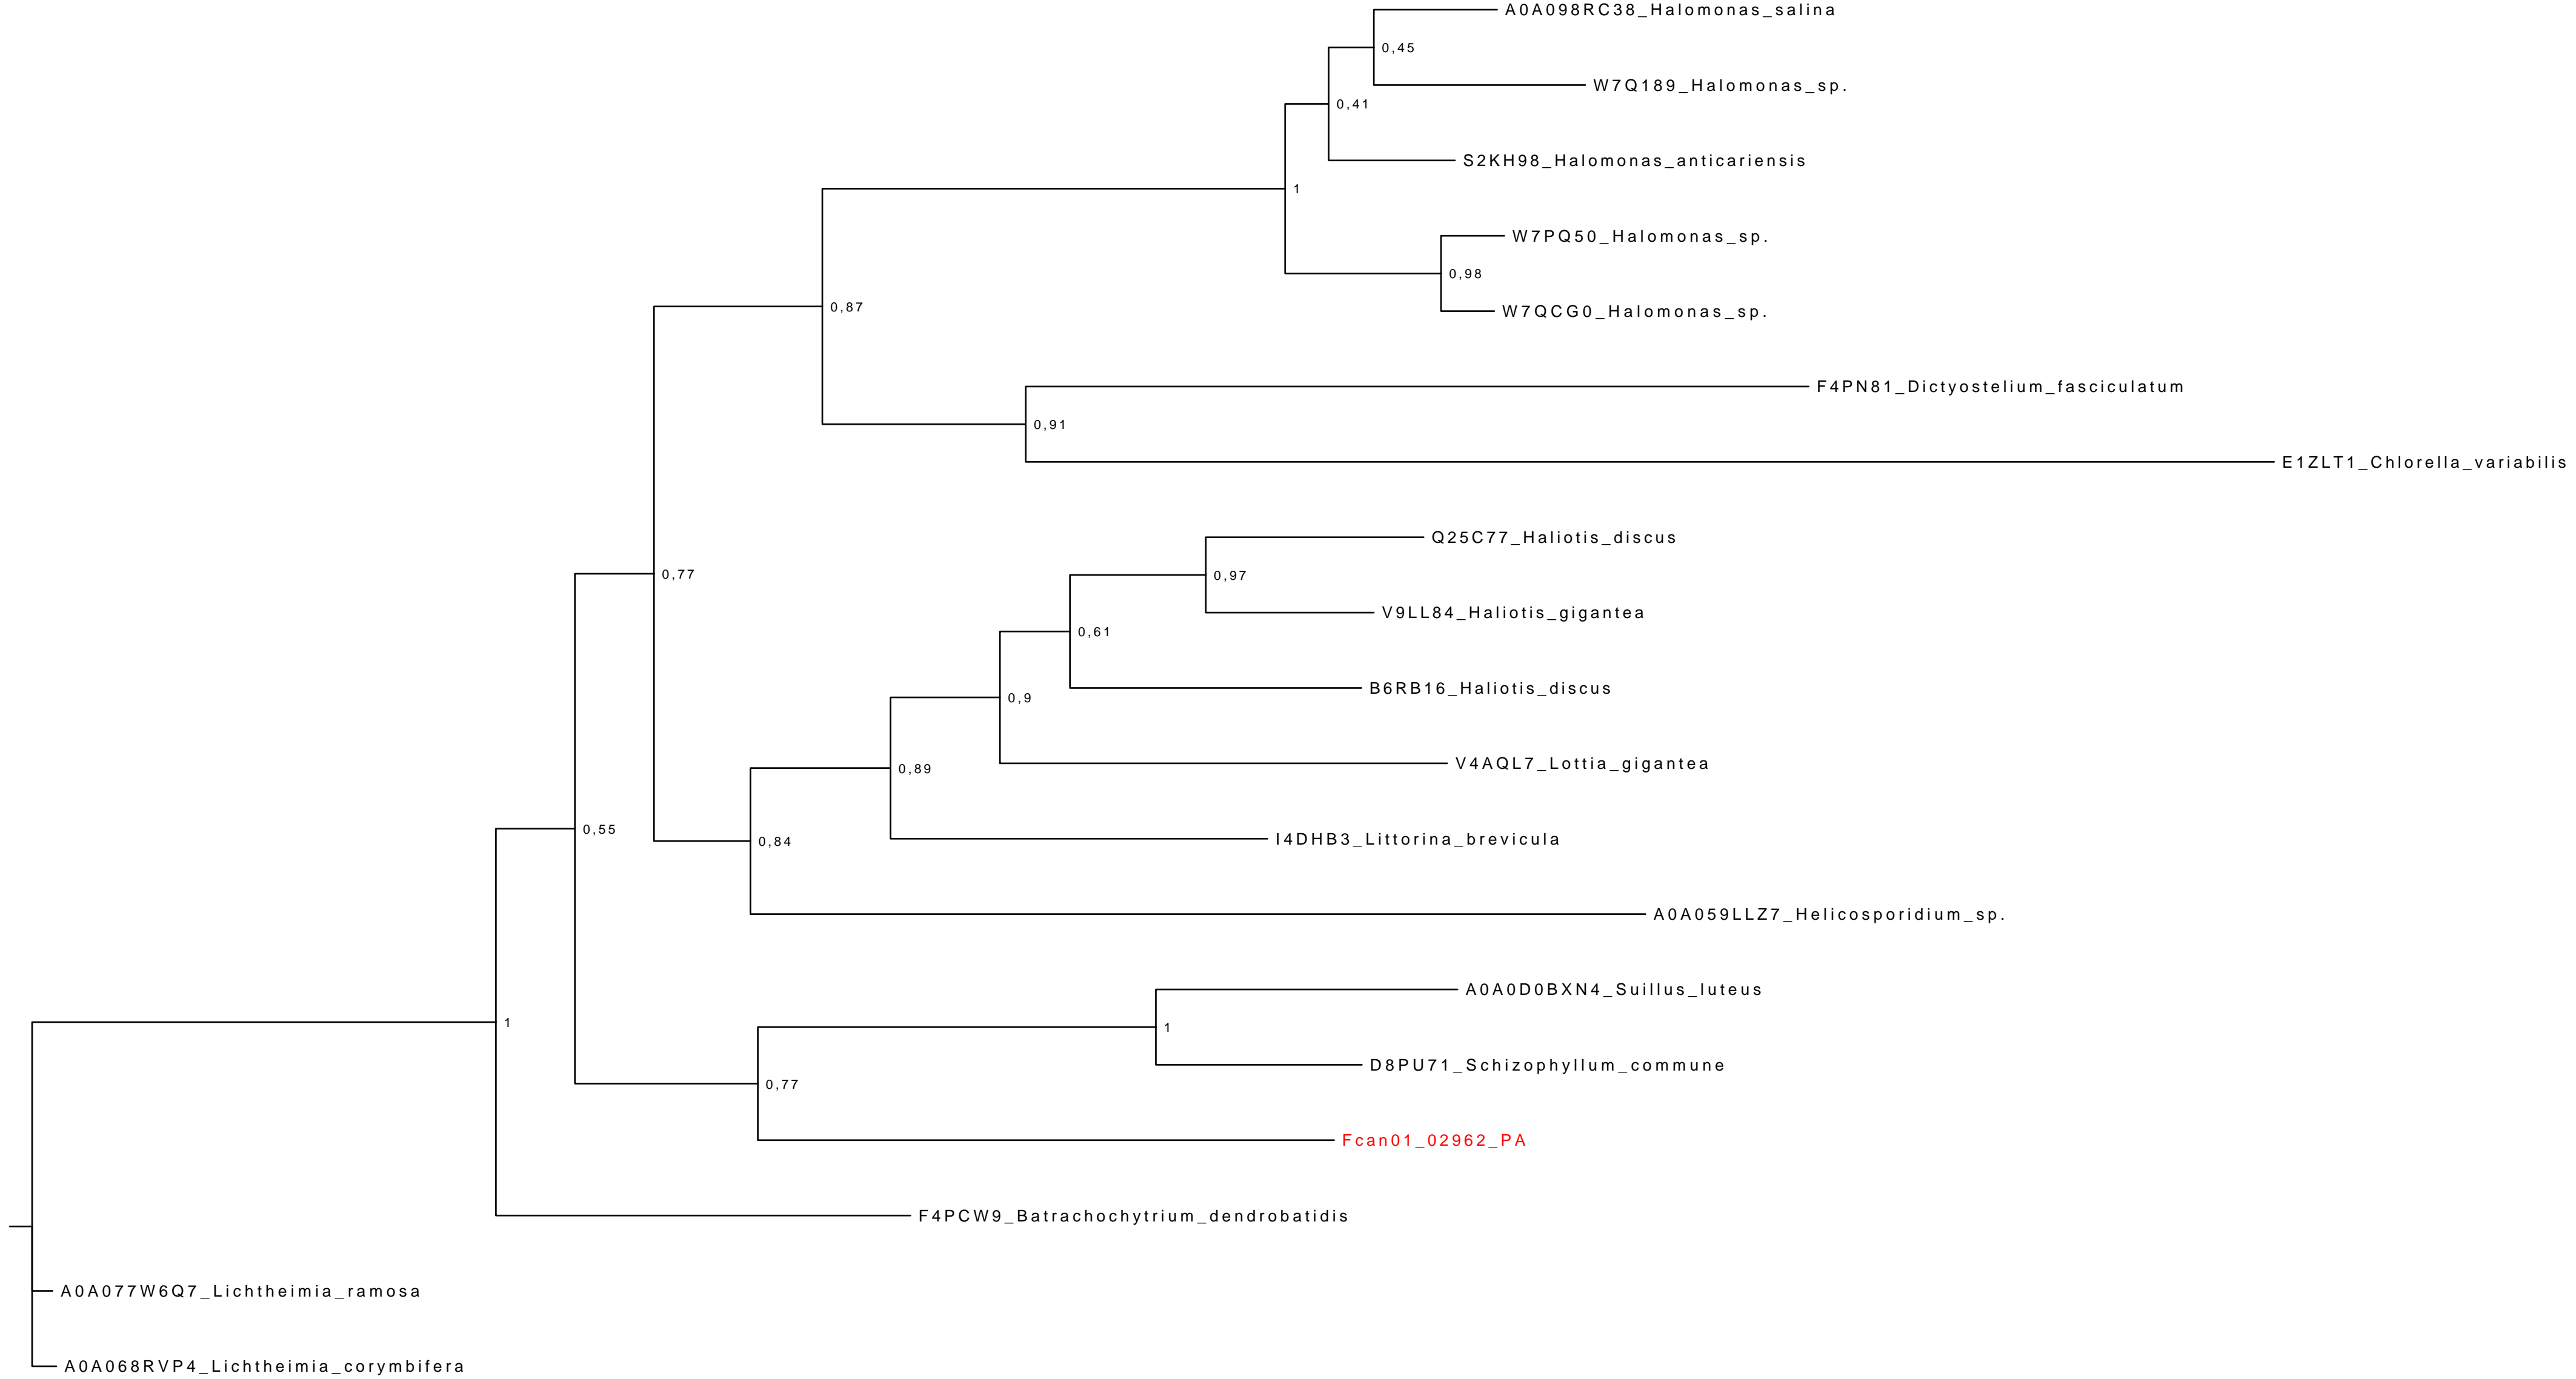

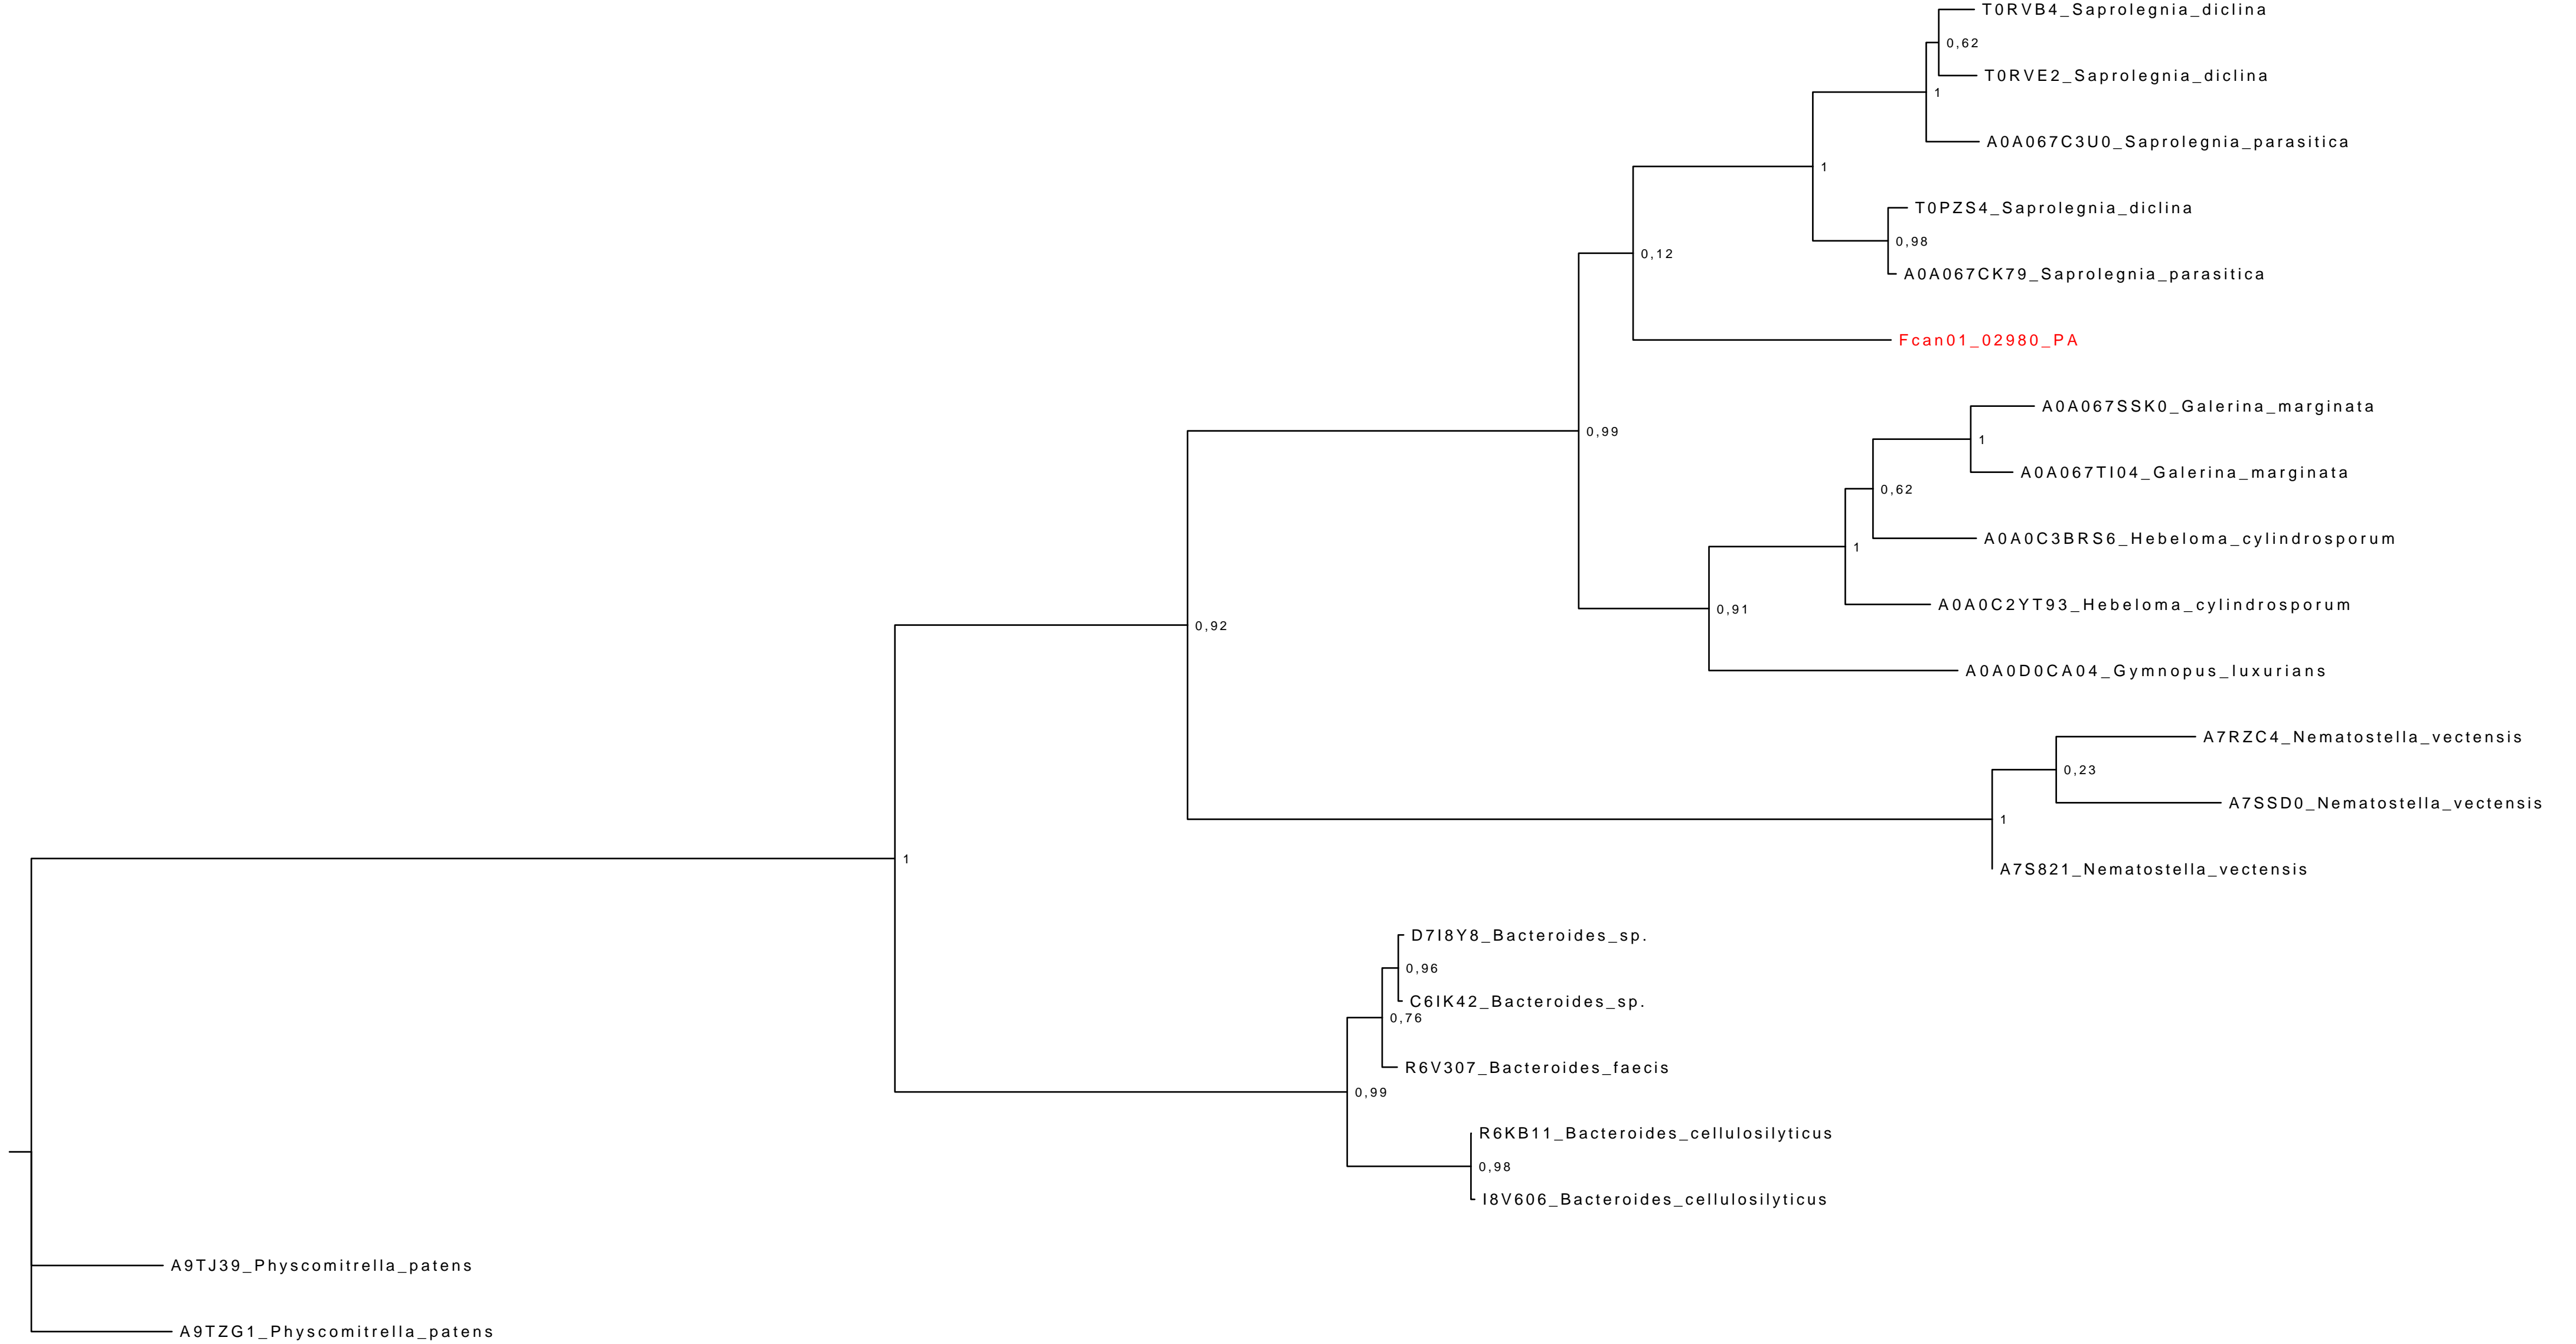



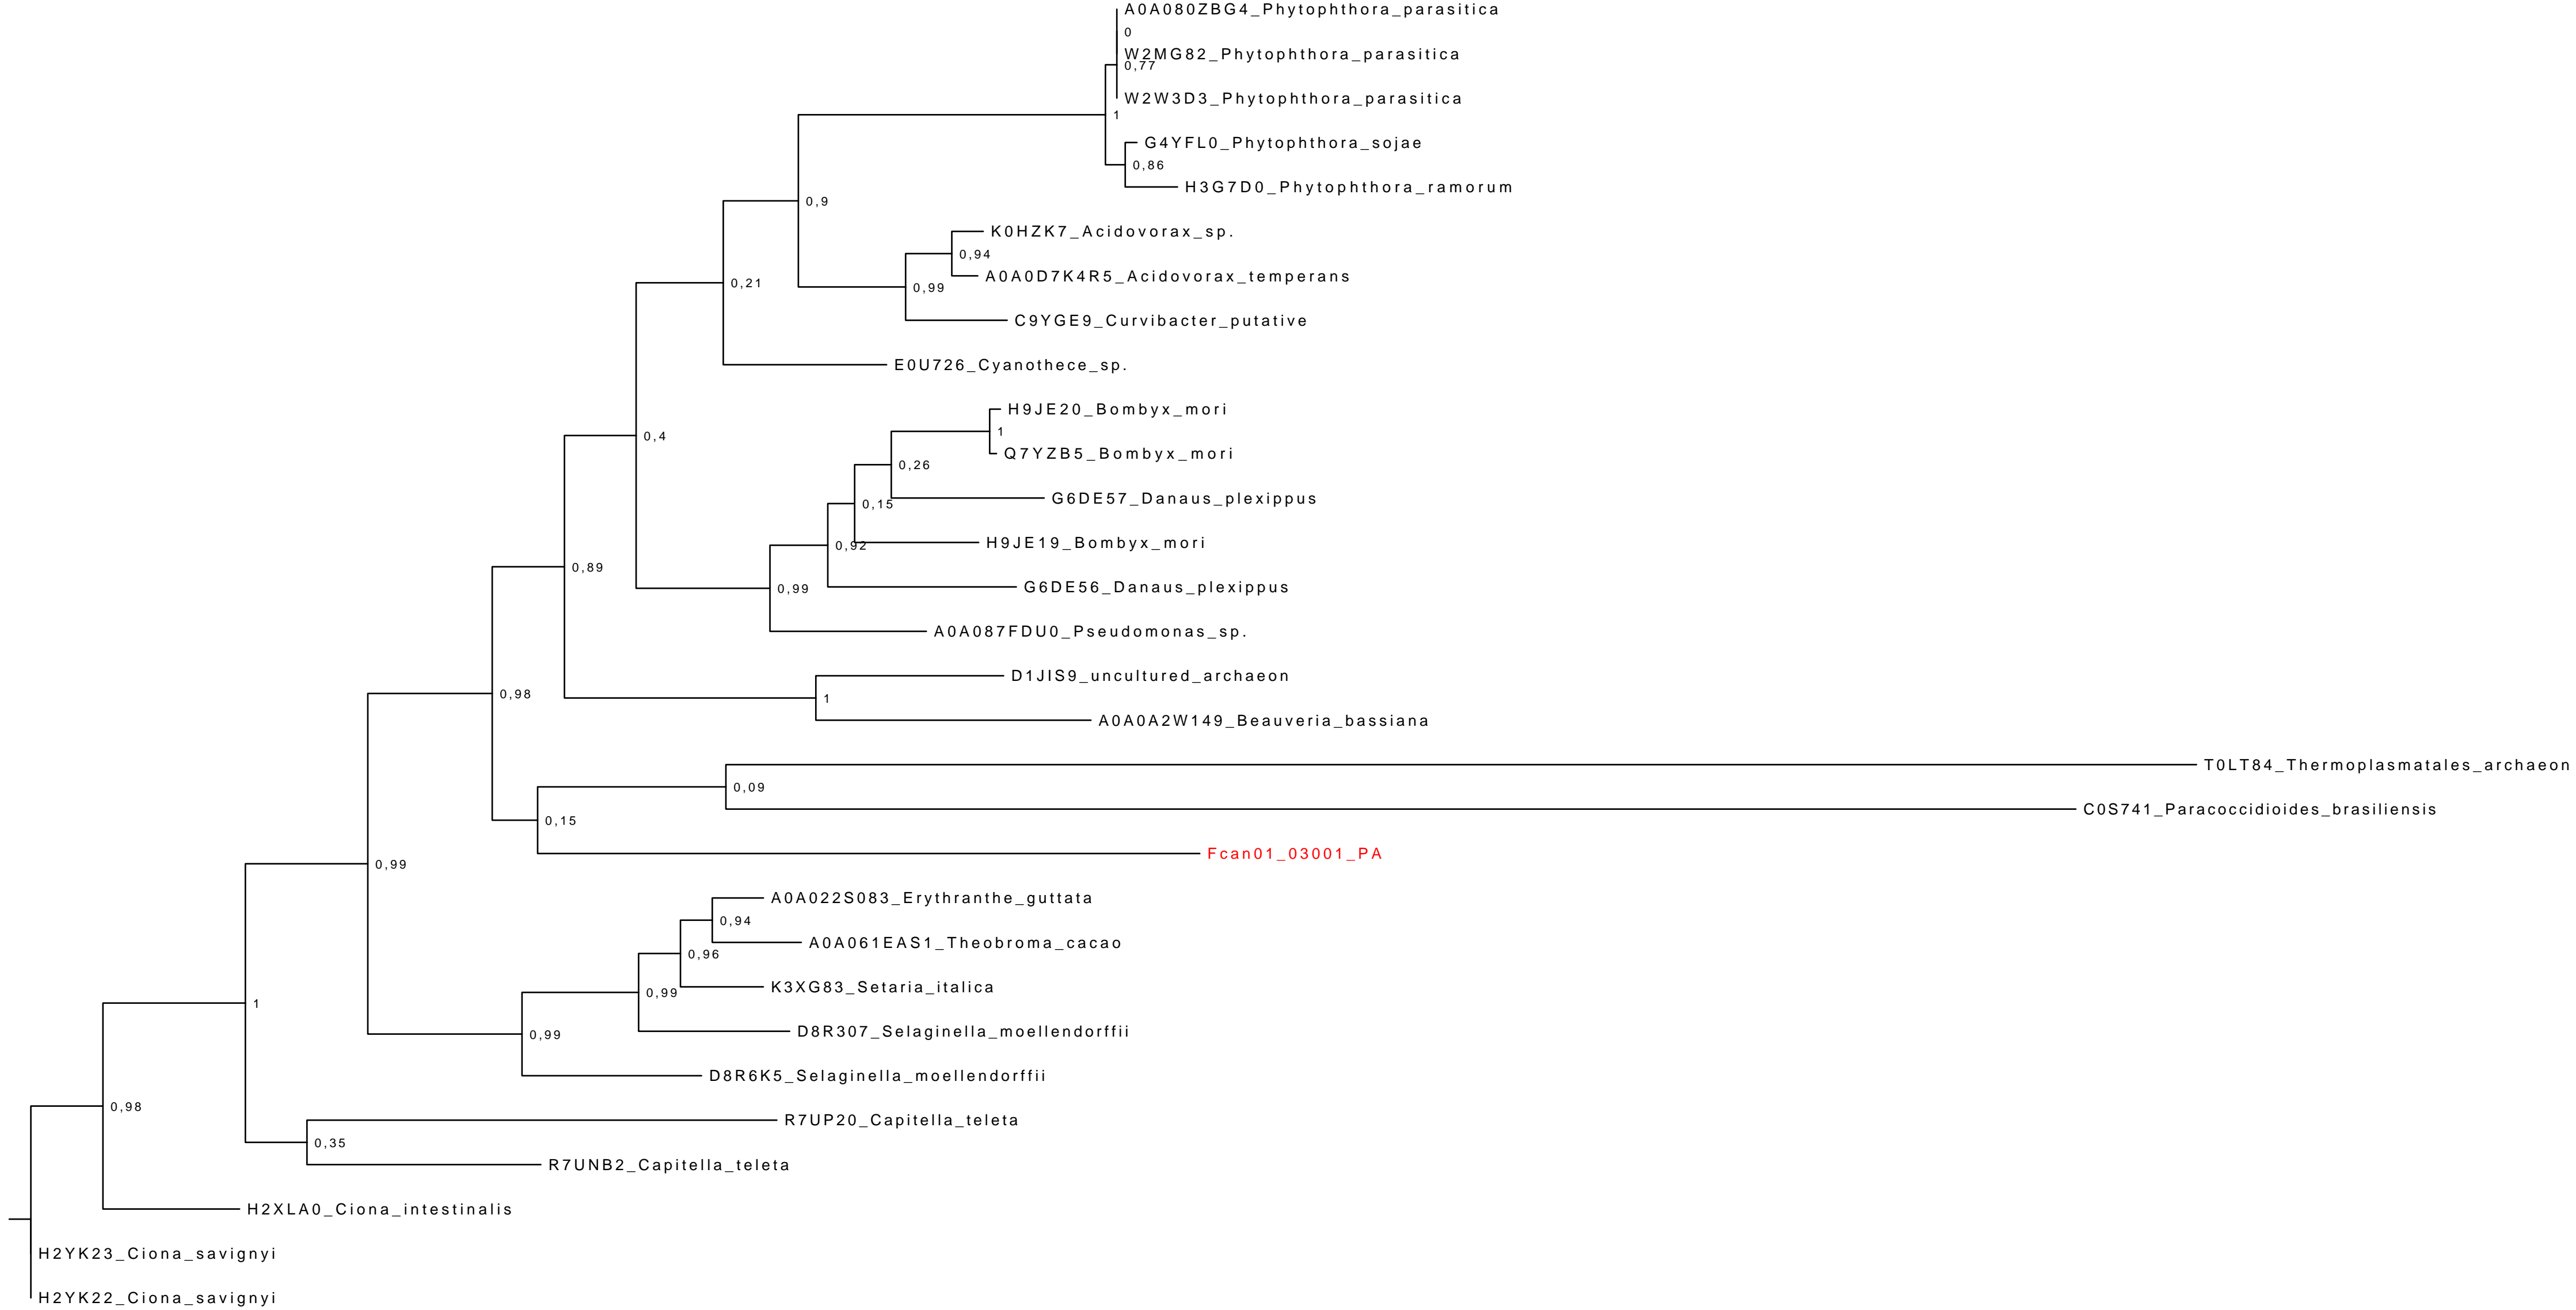

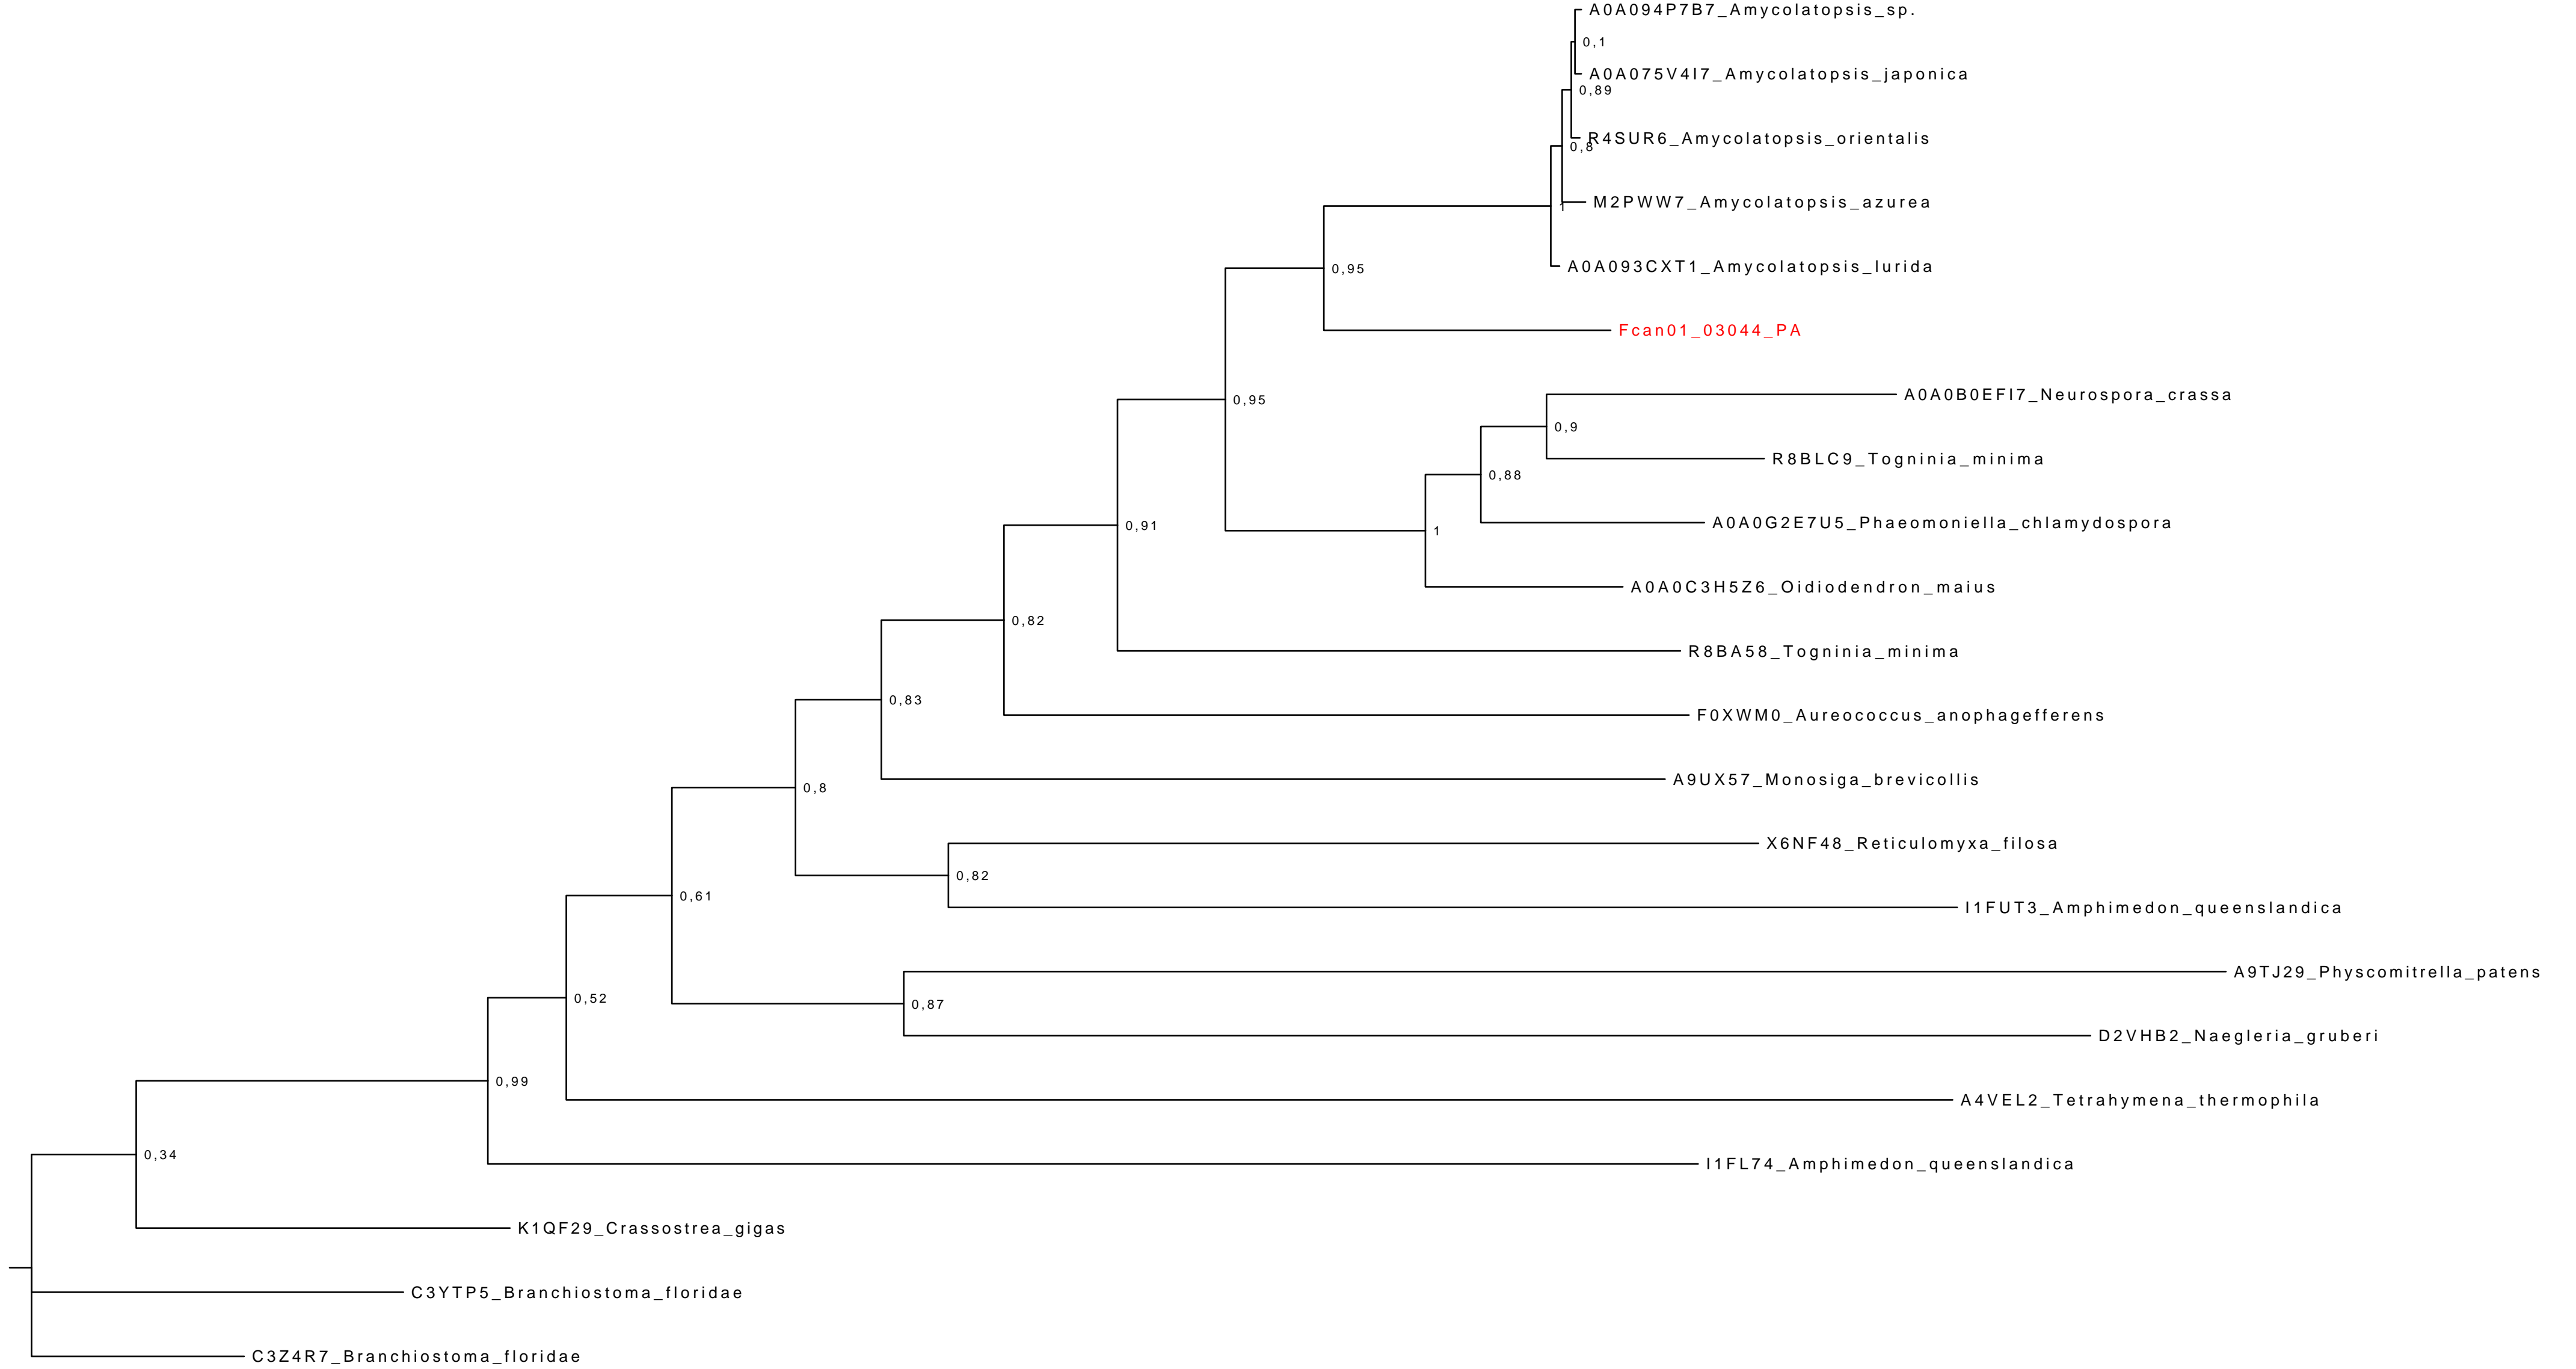

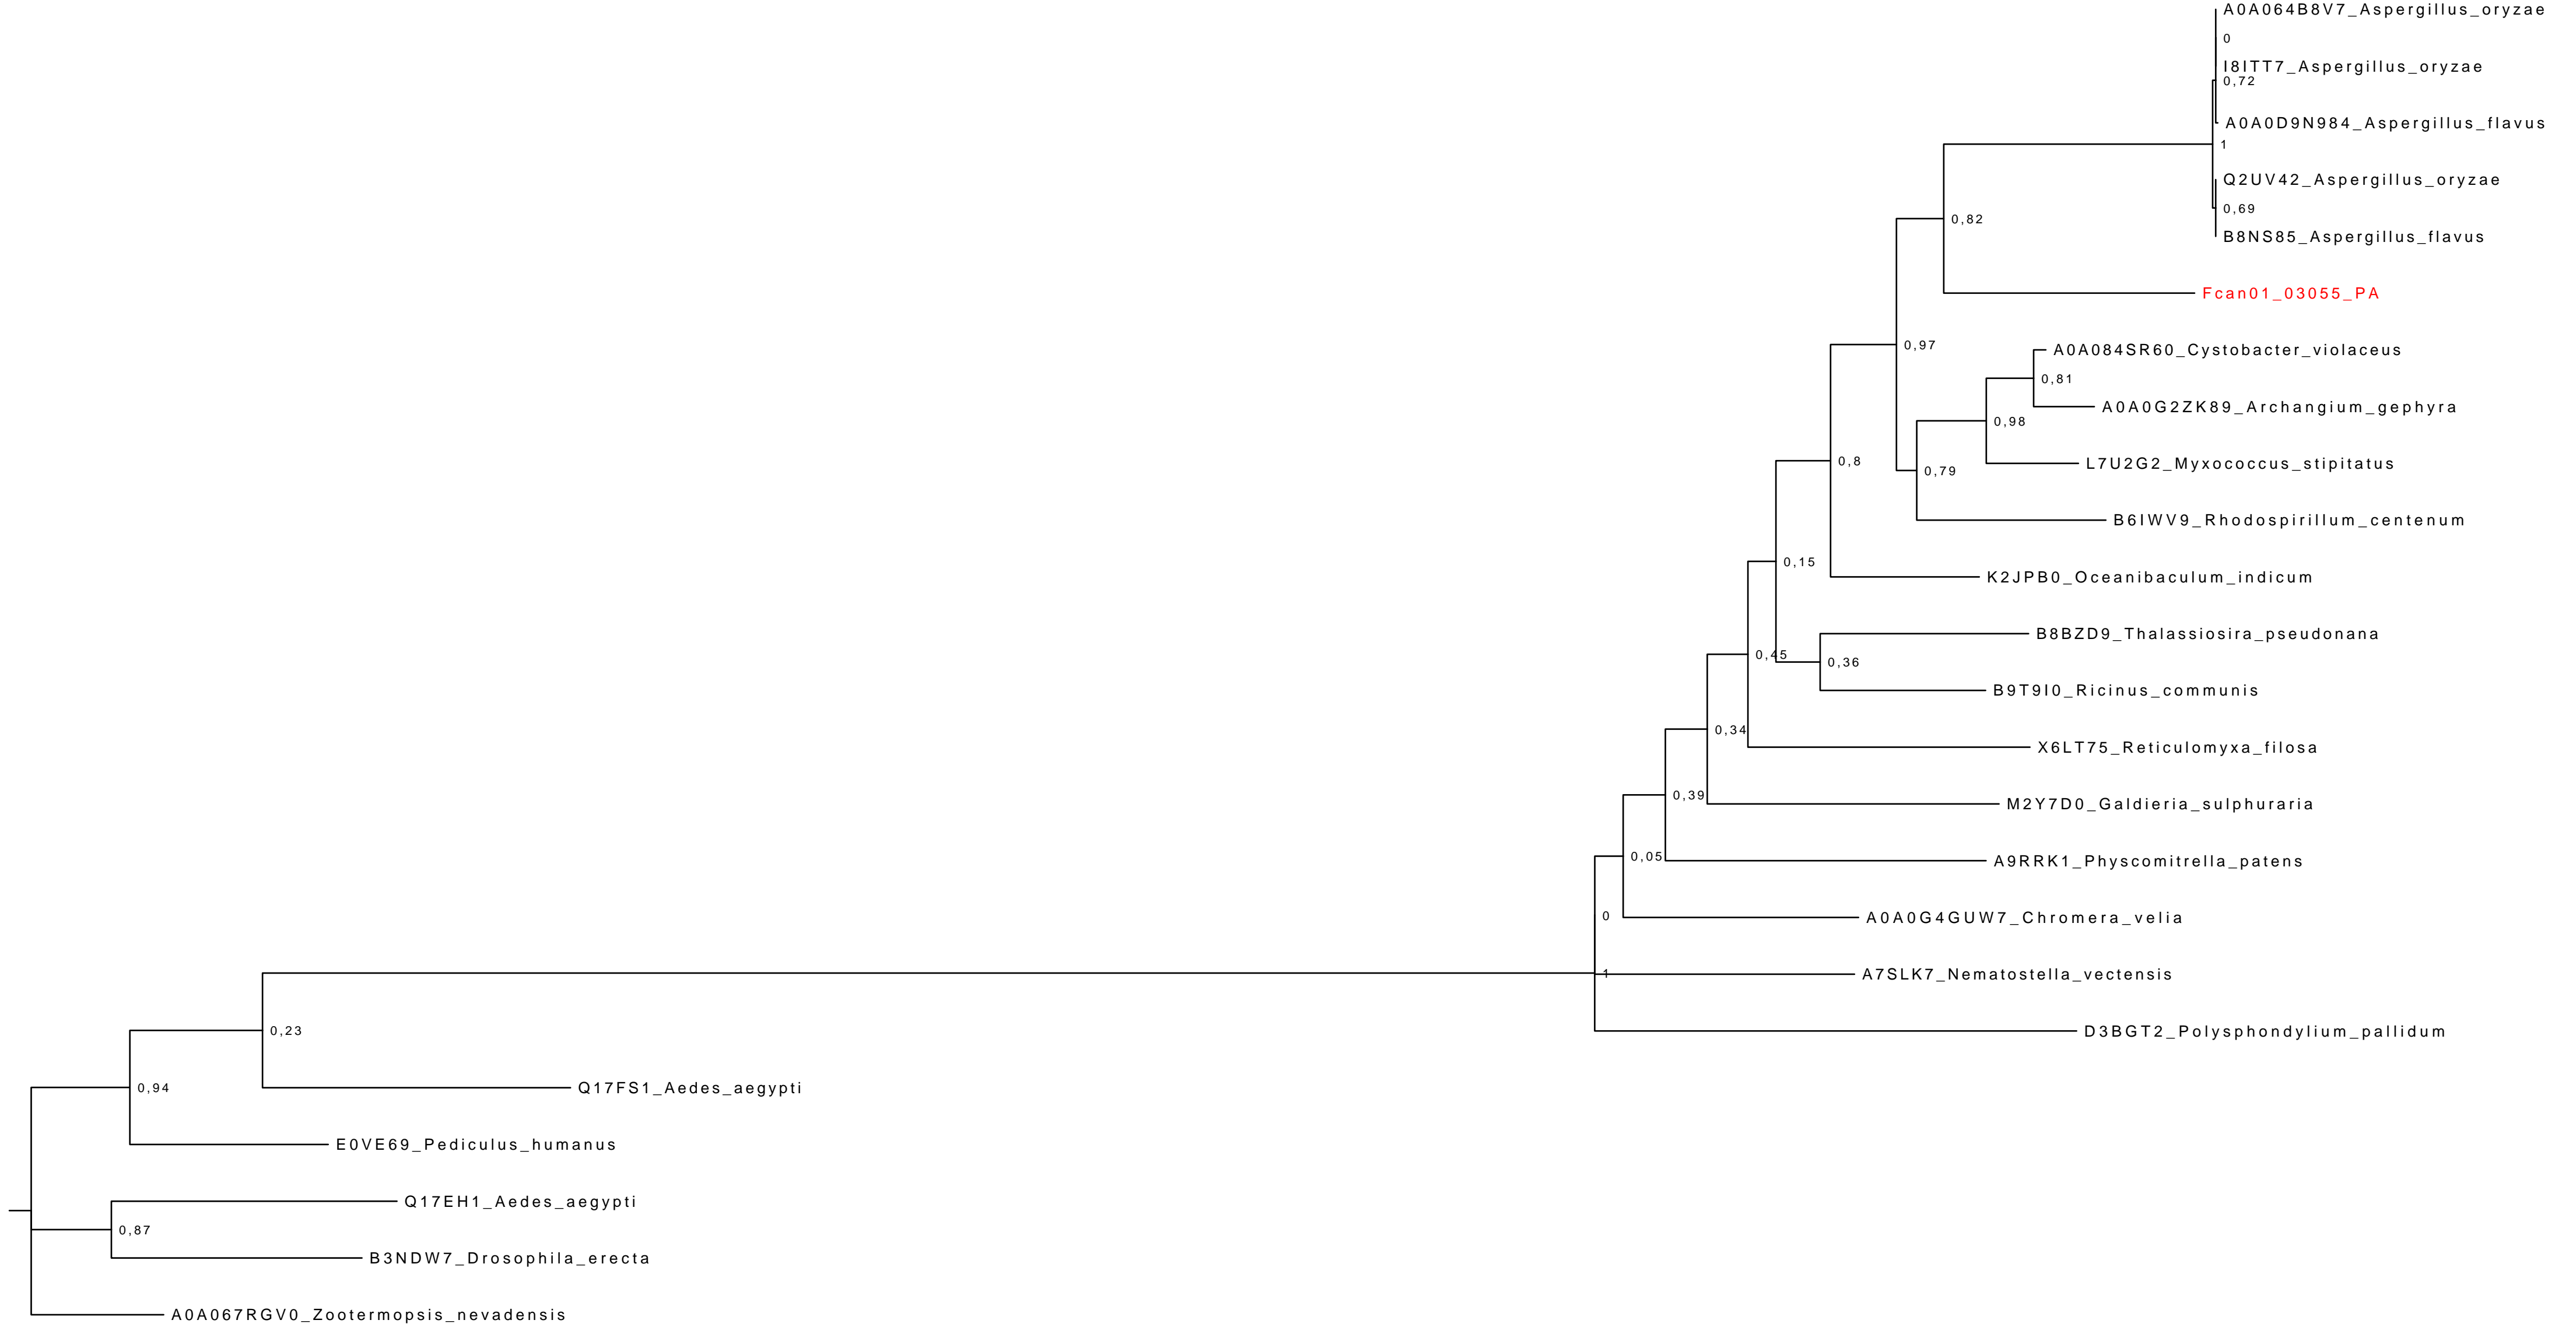

0.7

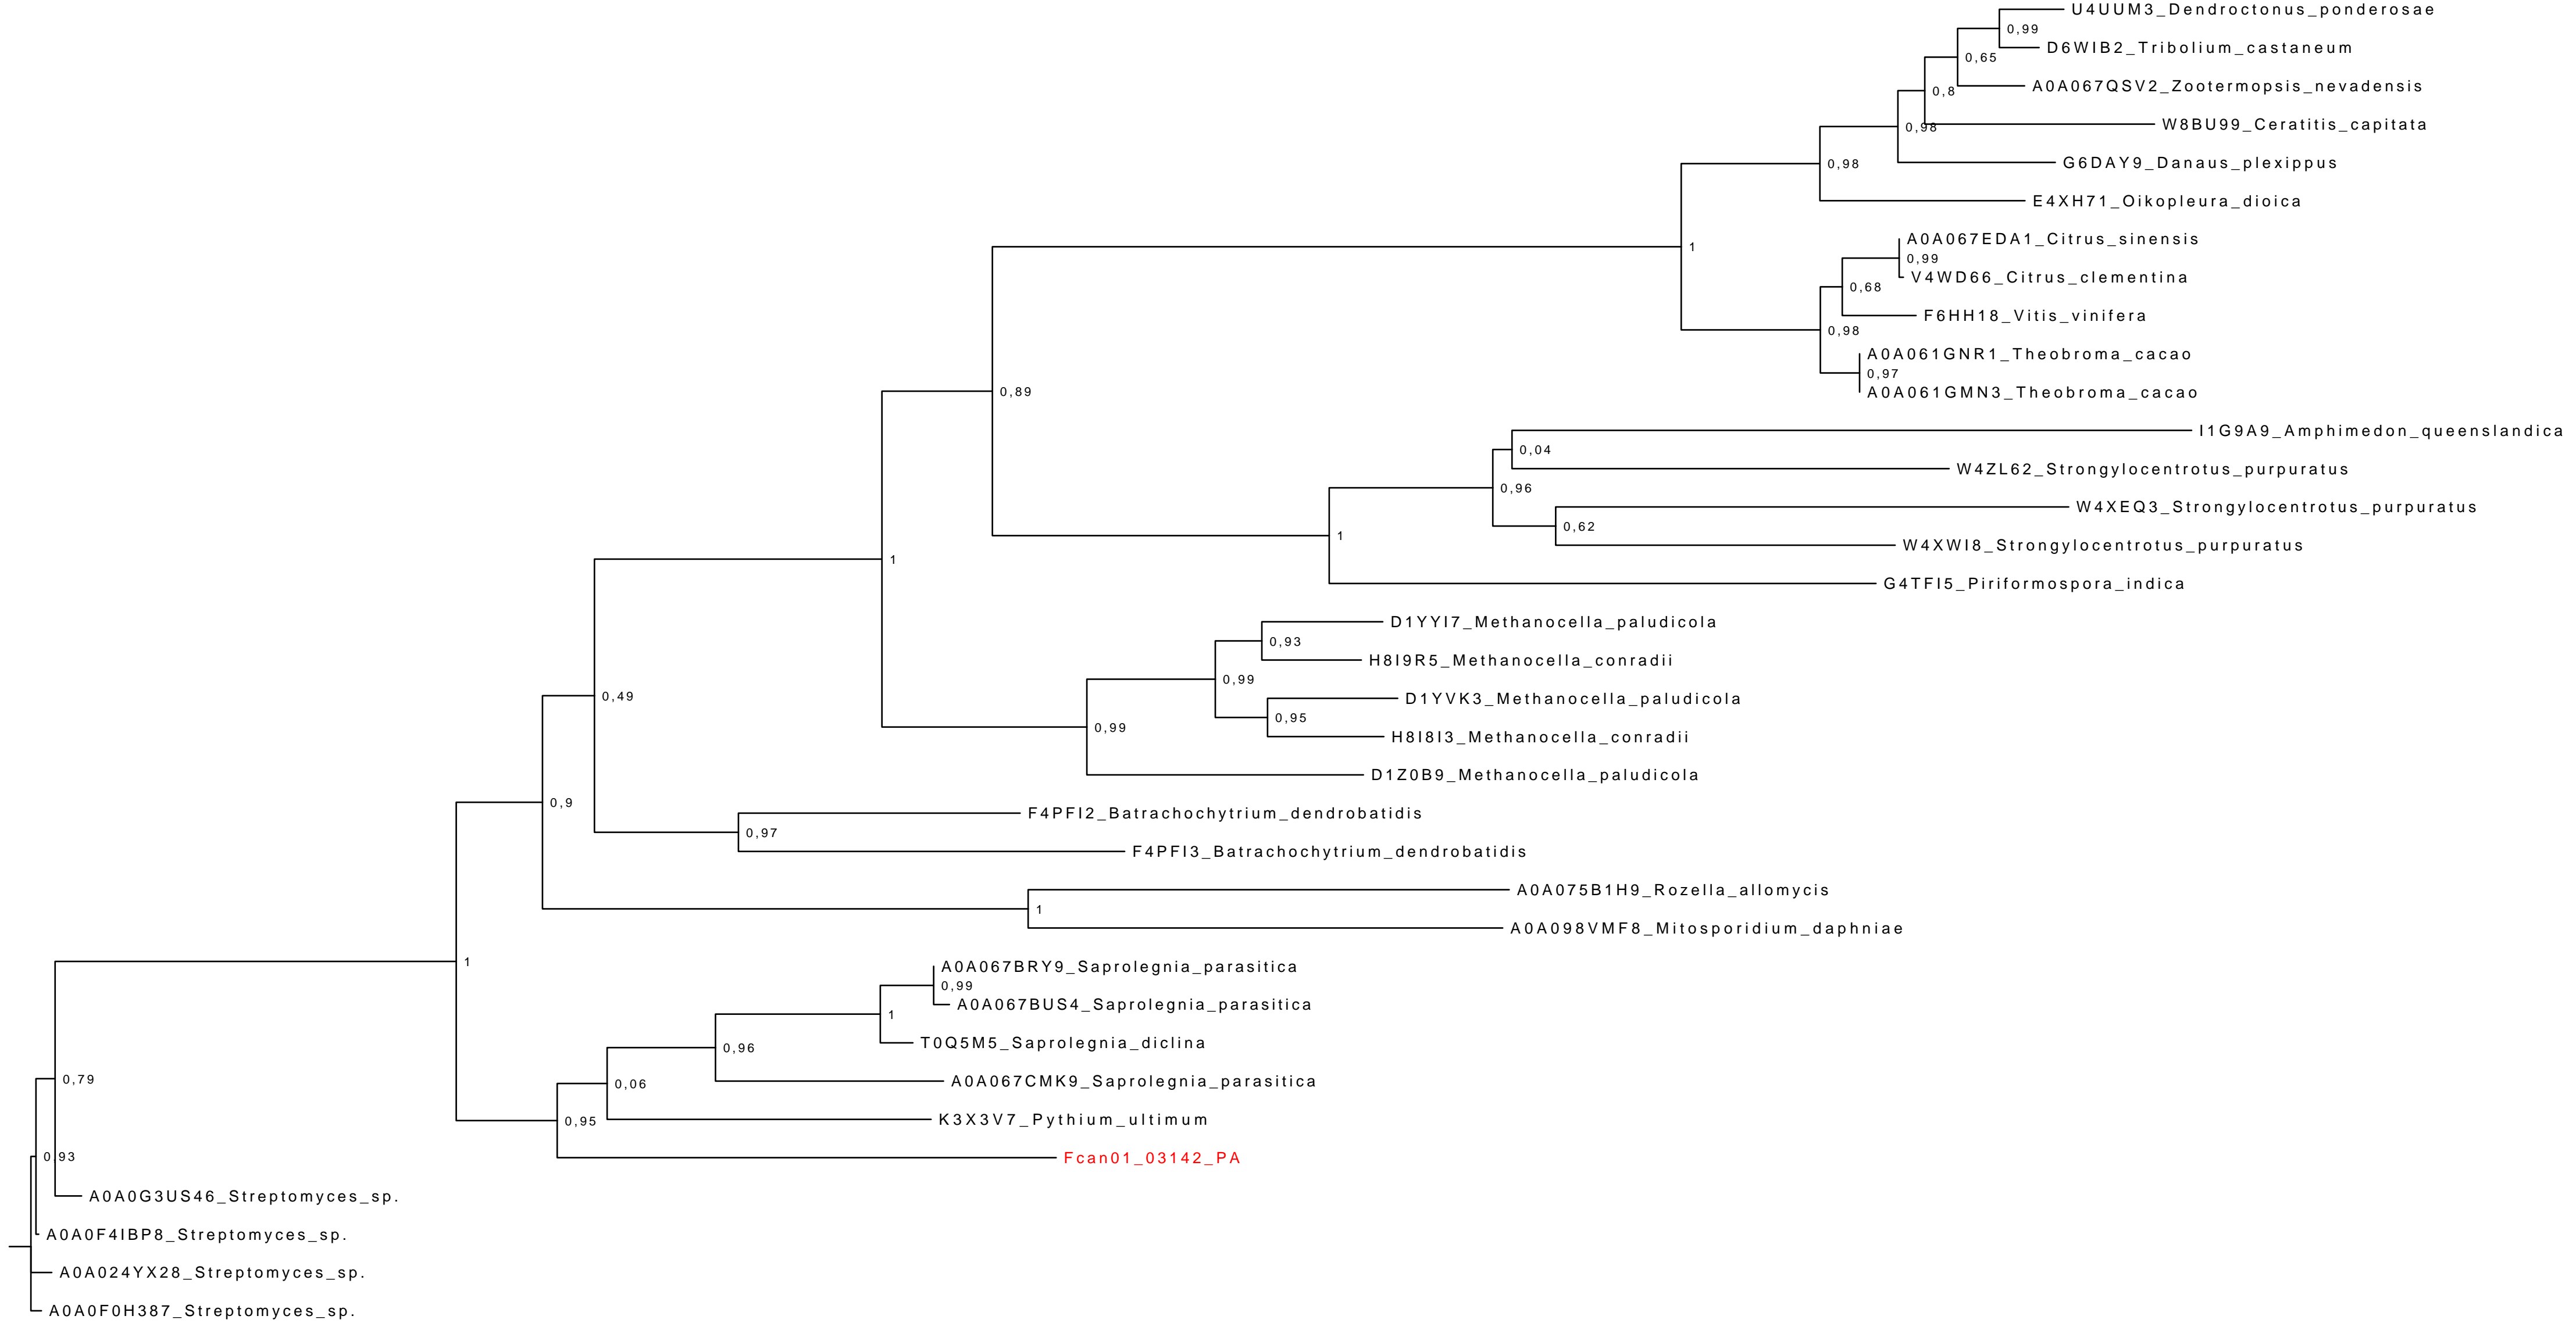

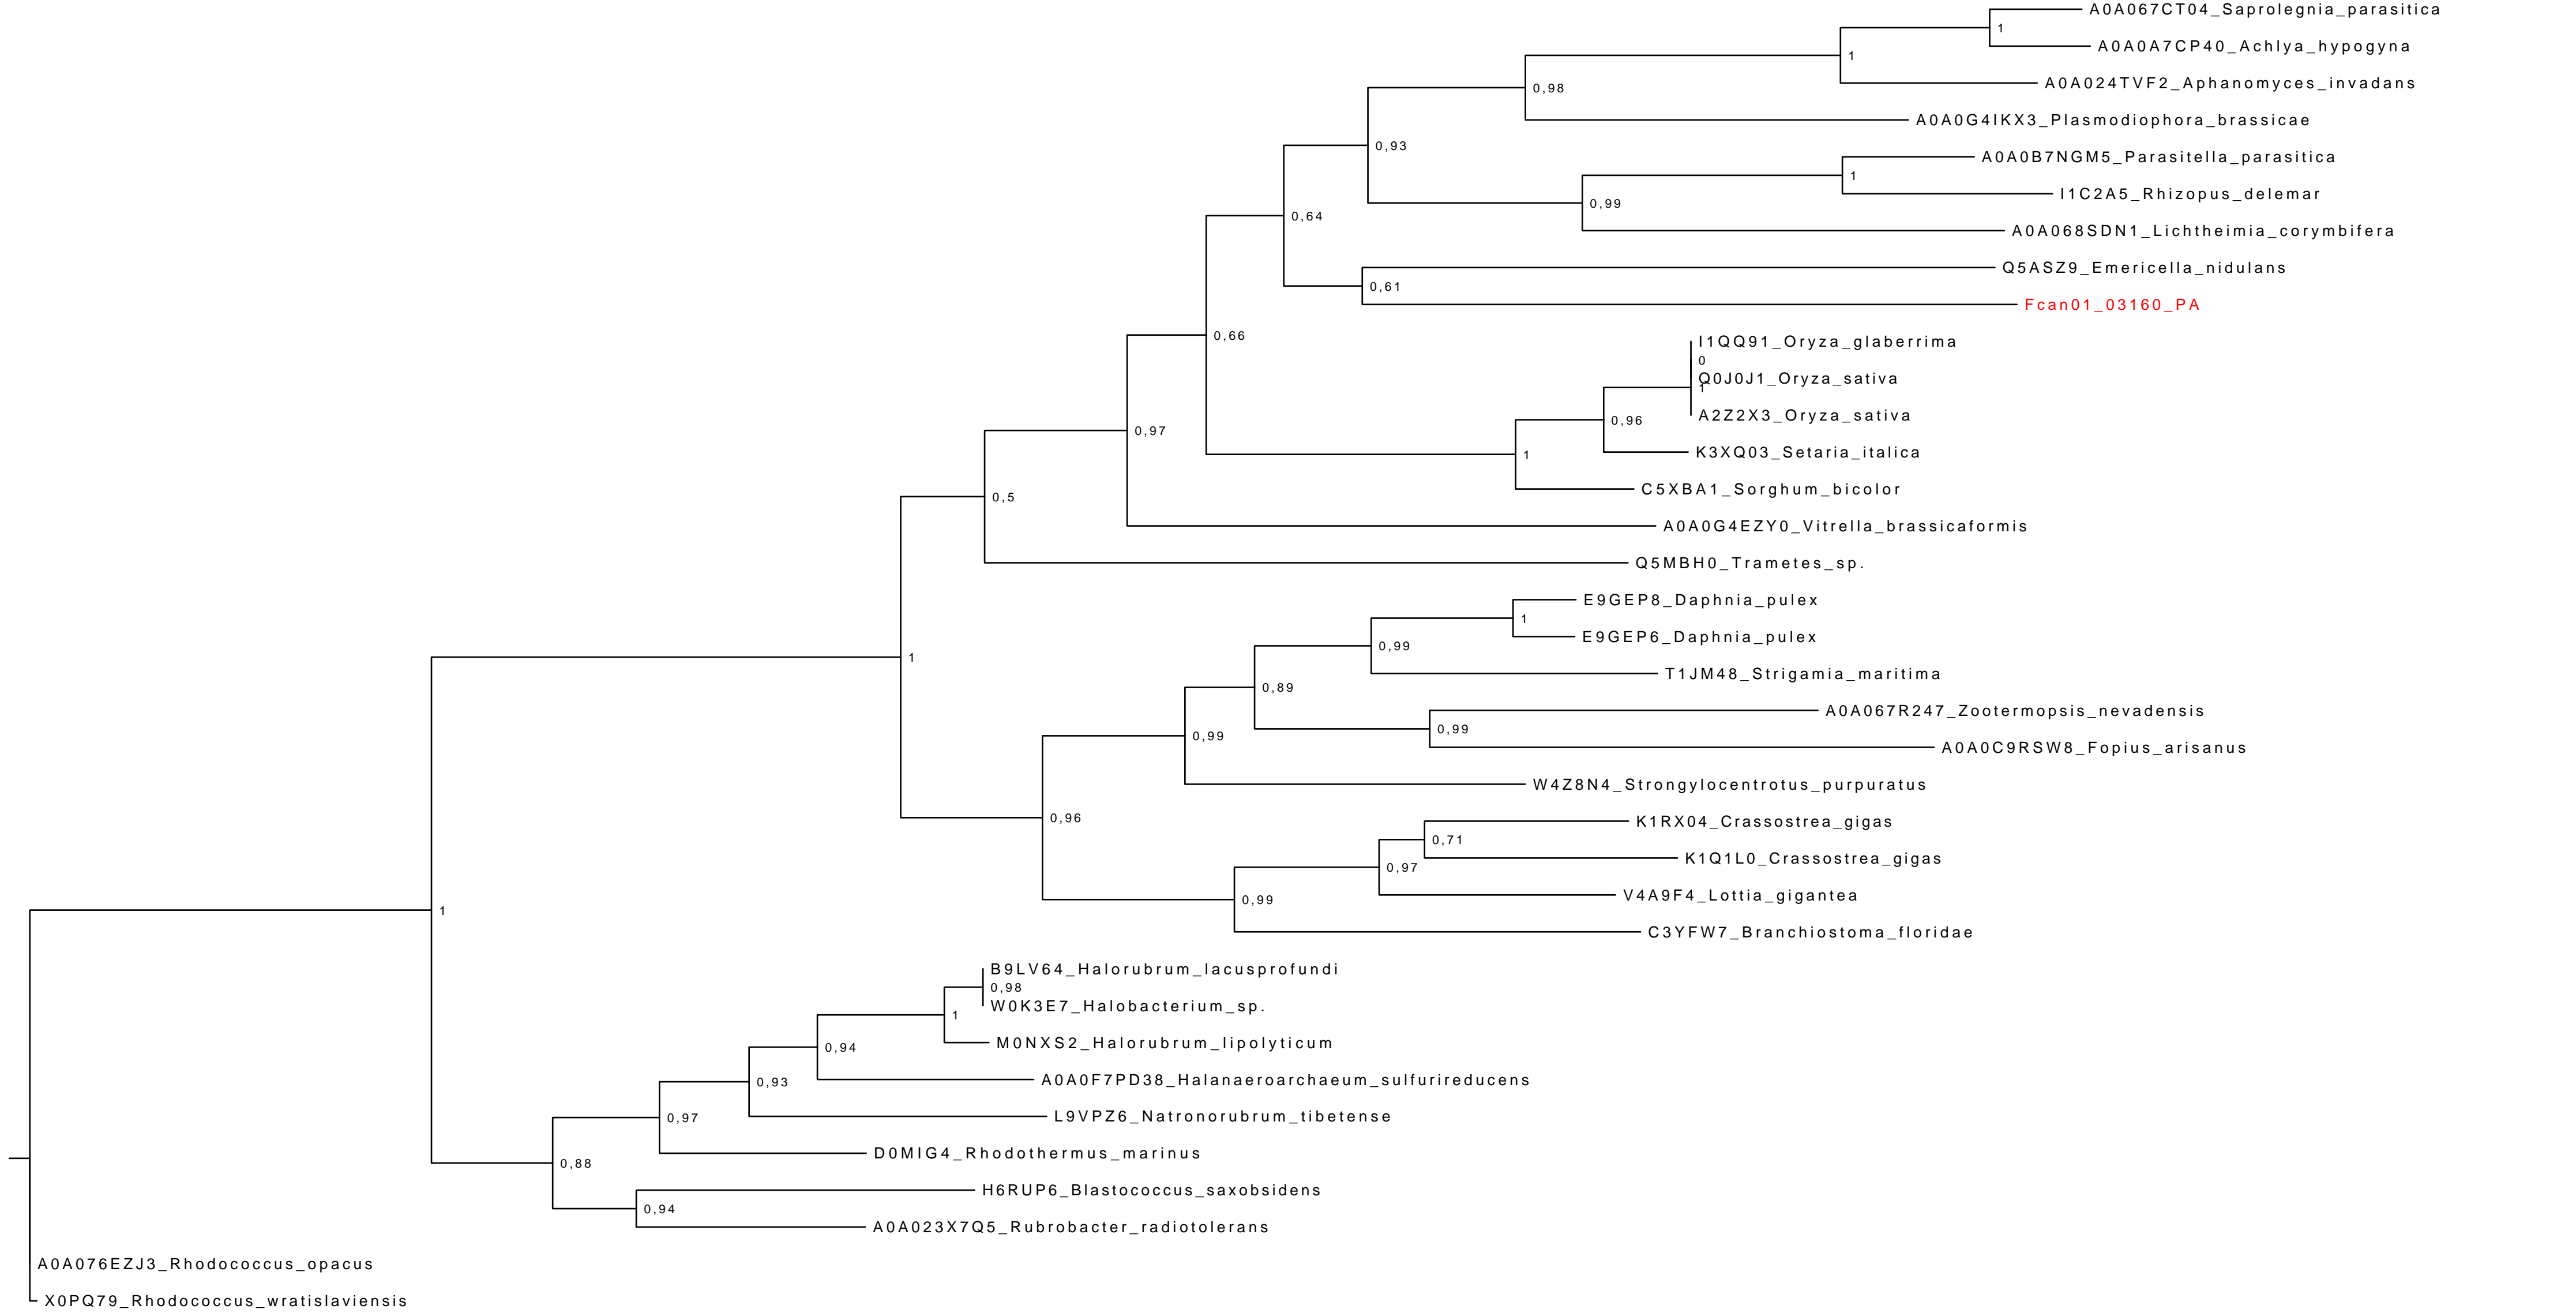

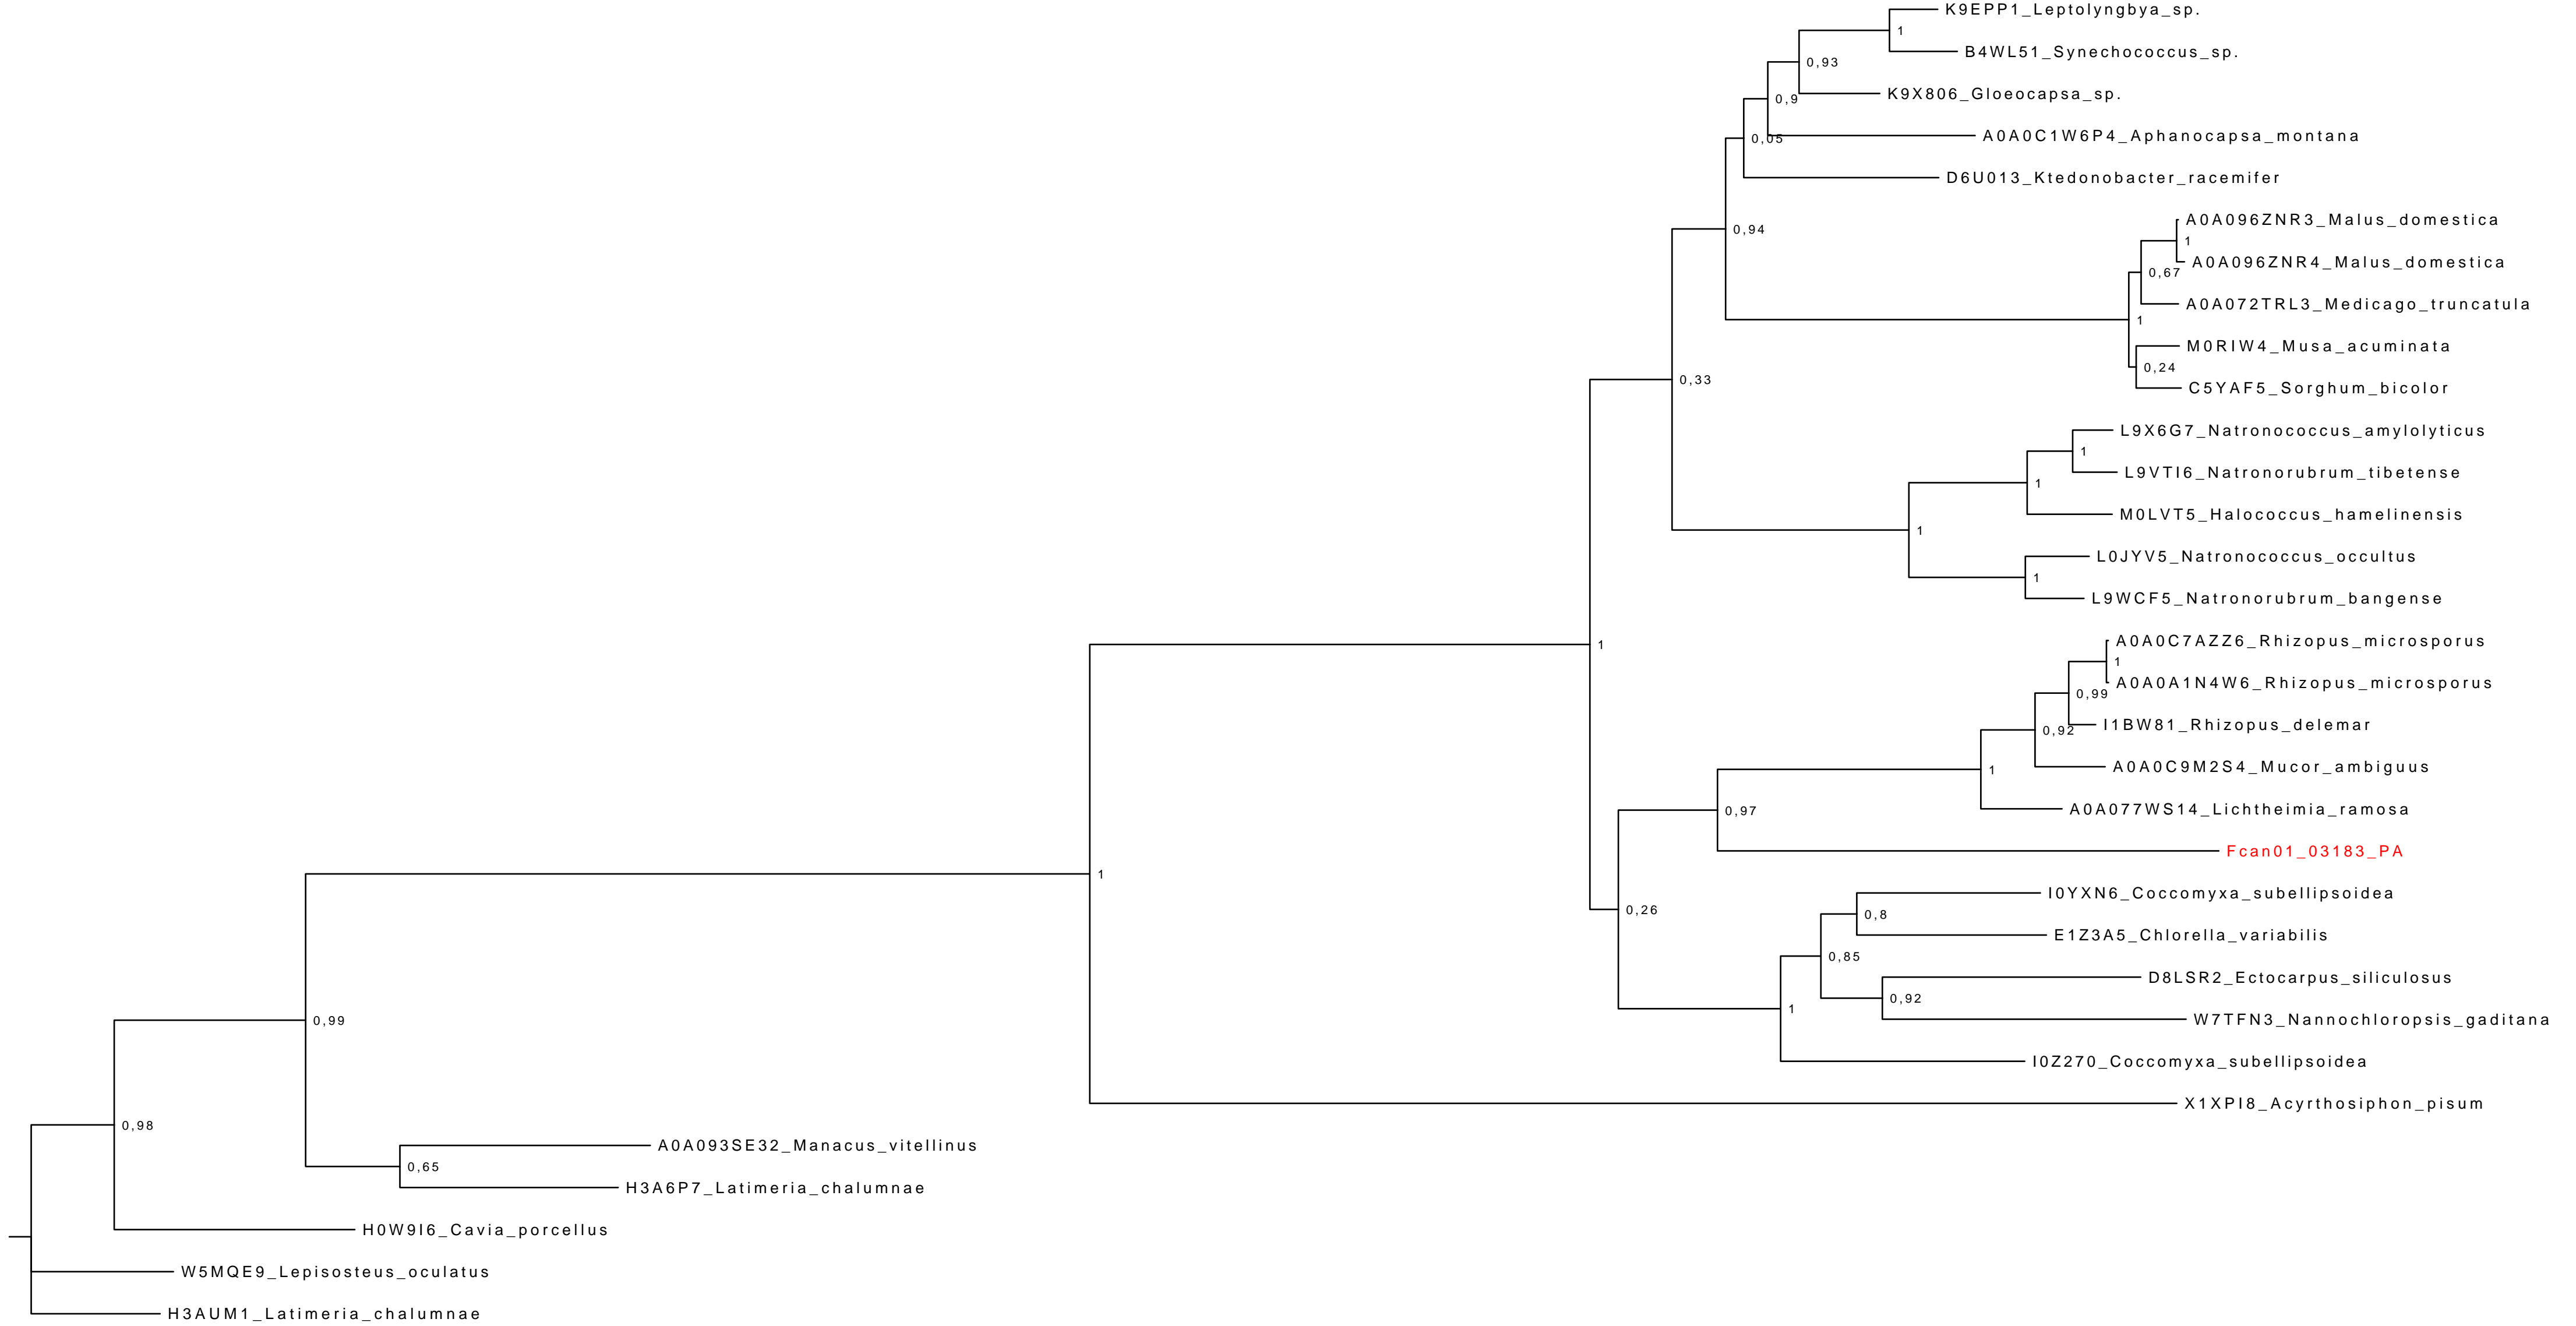

0.5

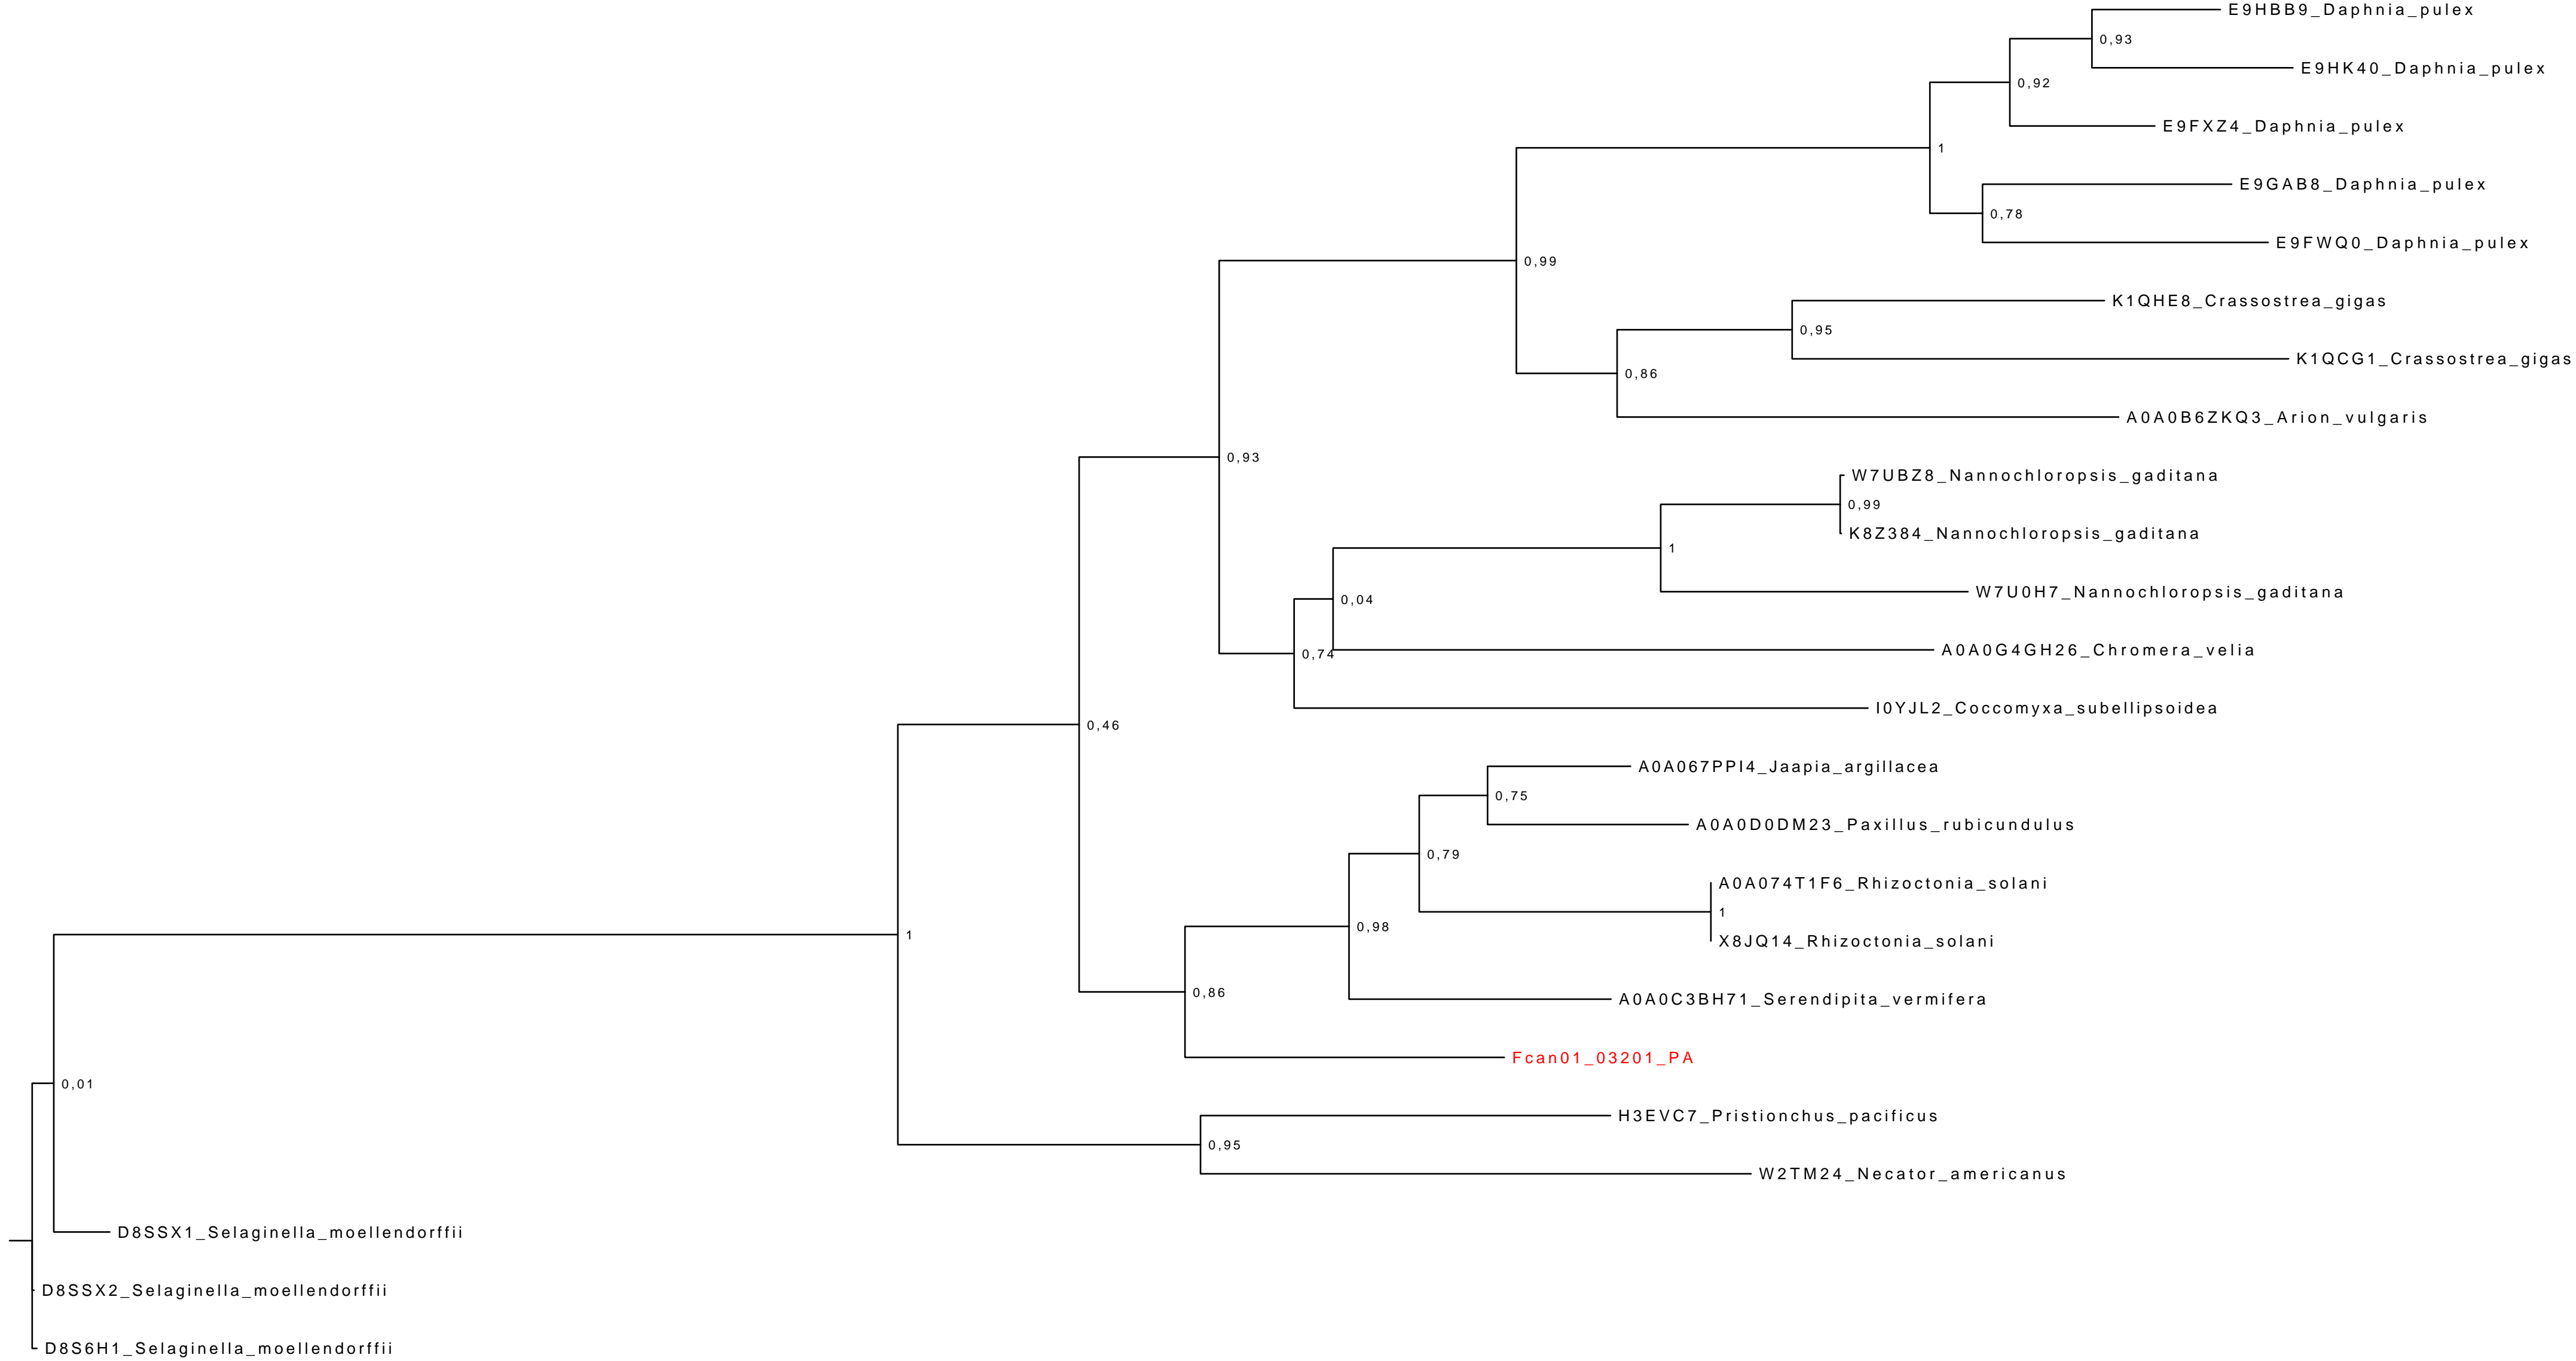

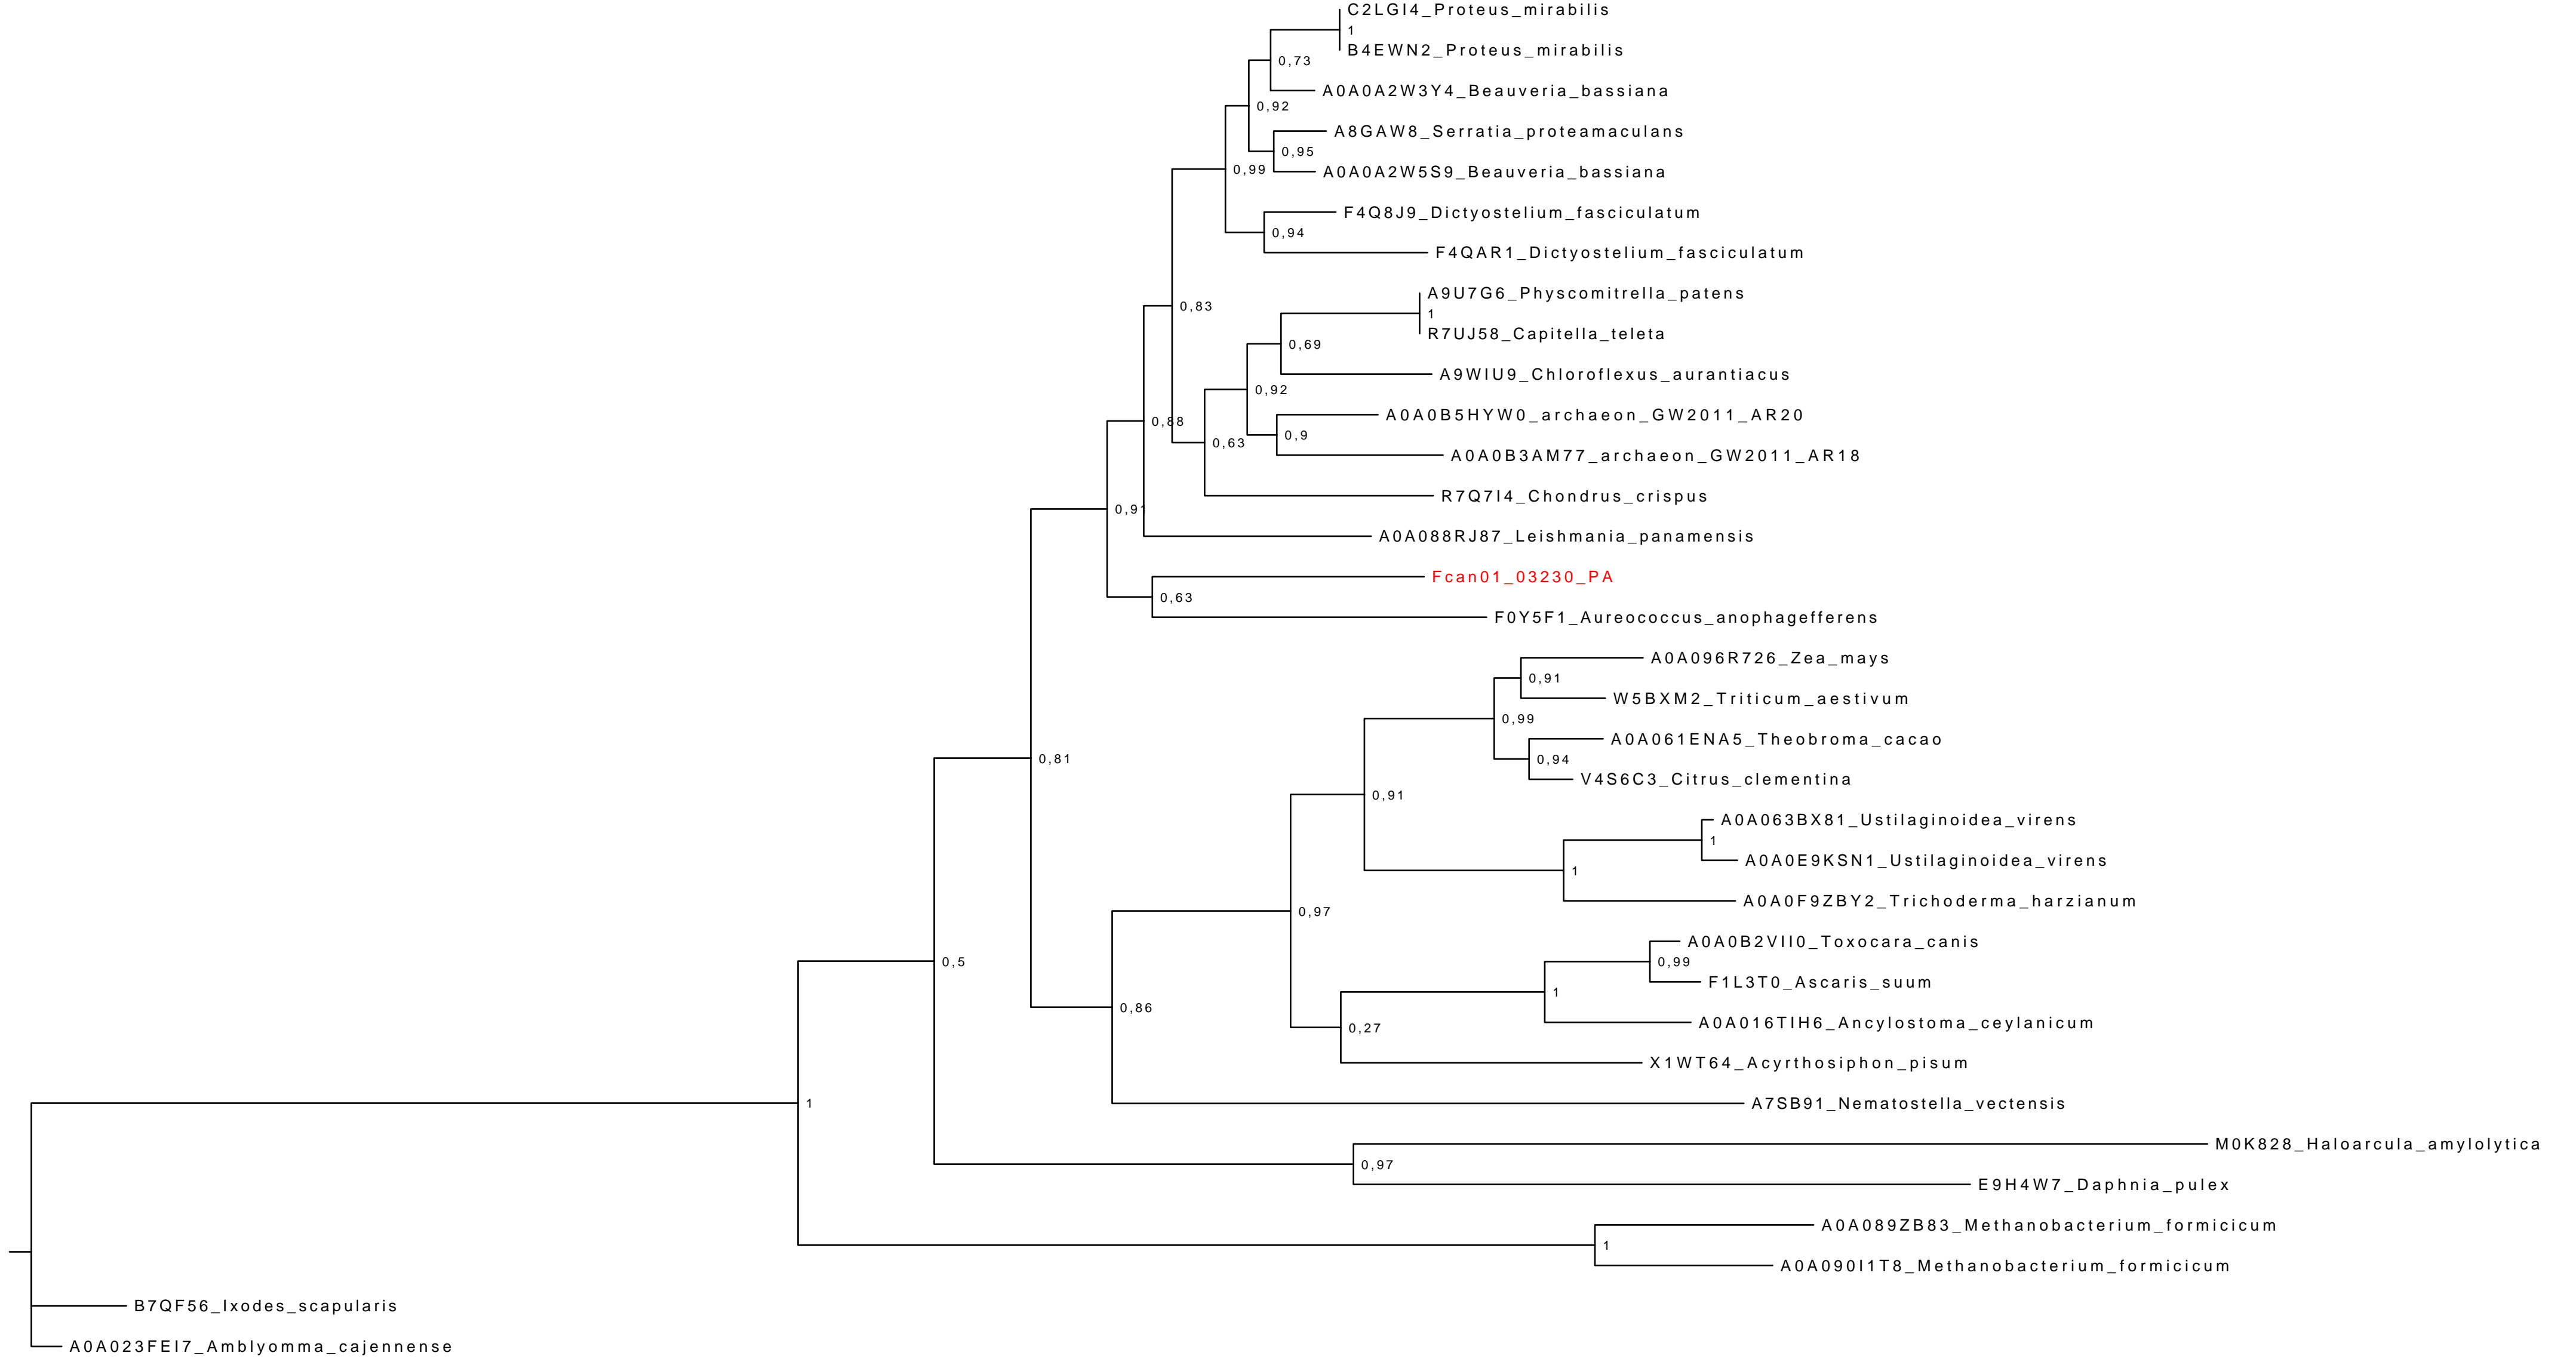



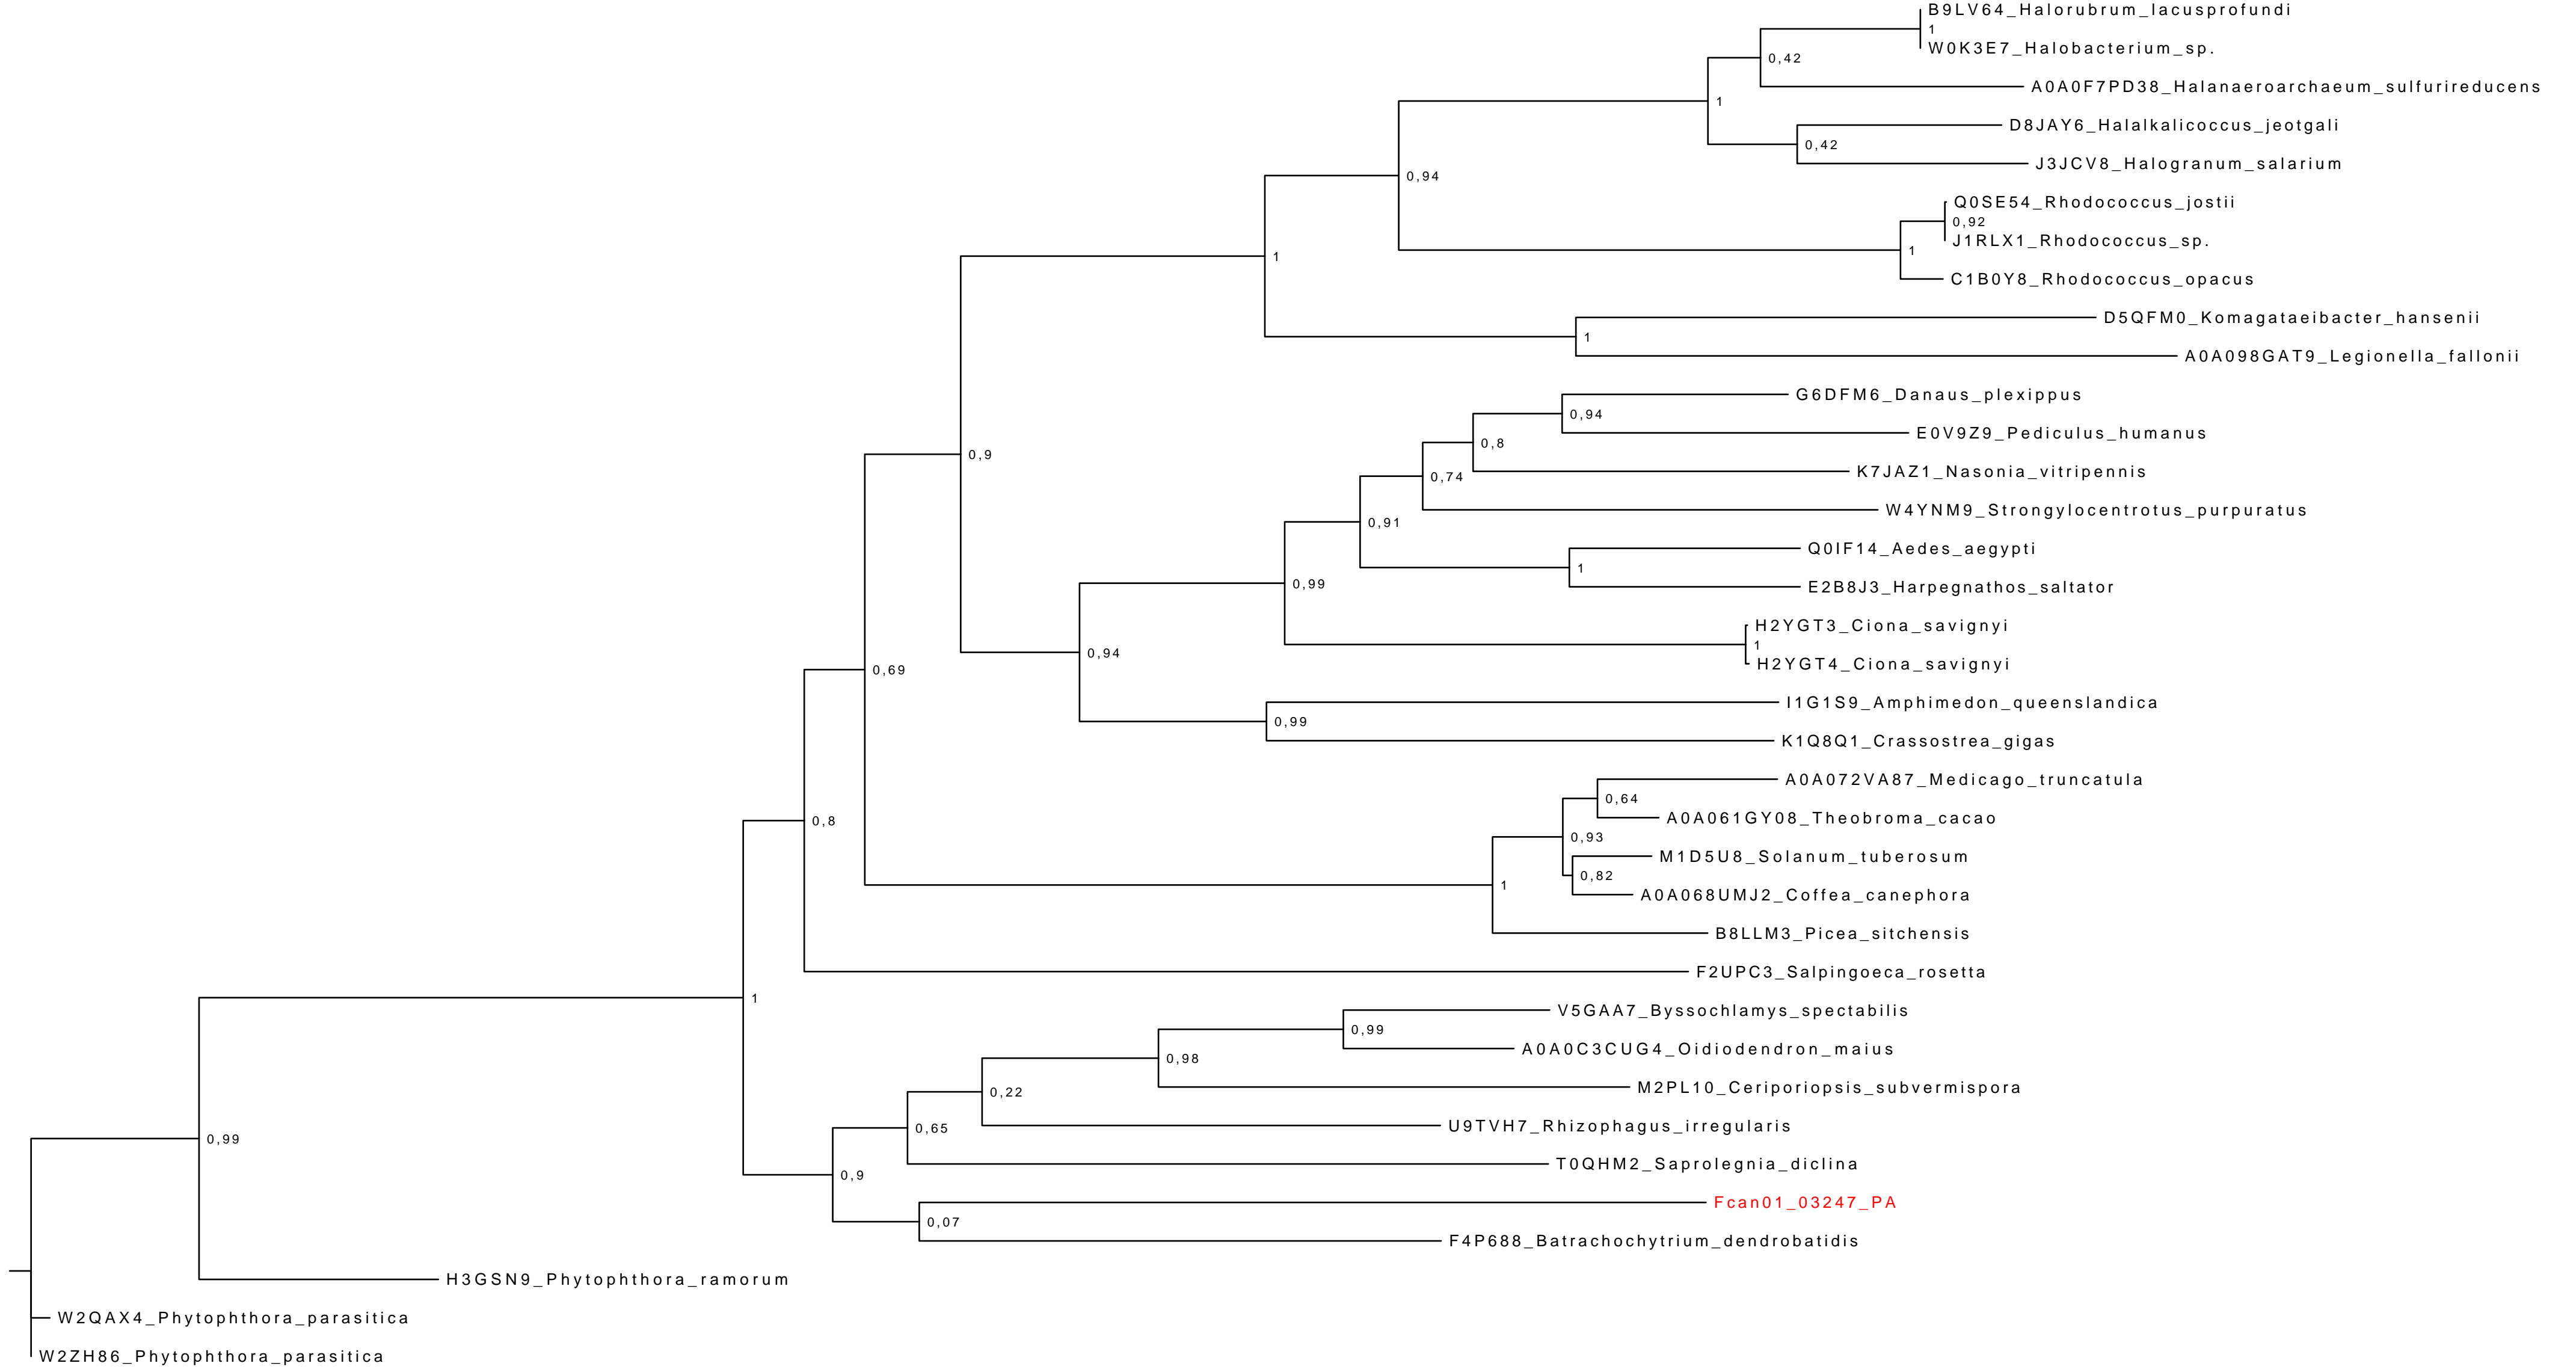

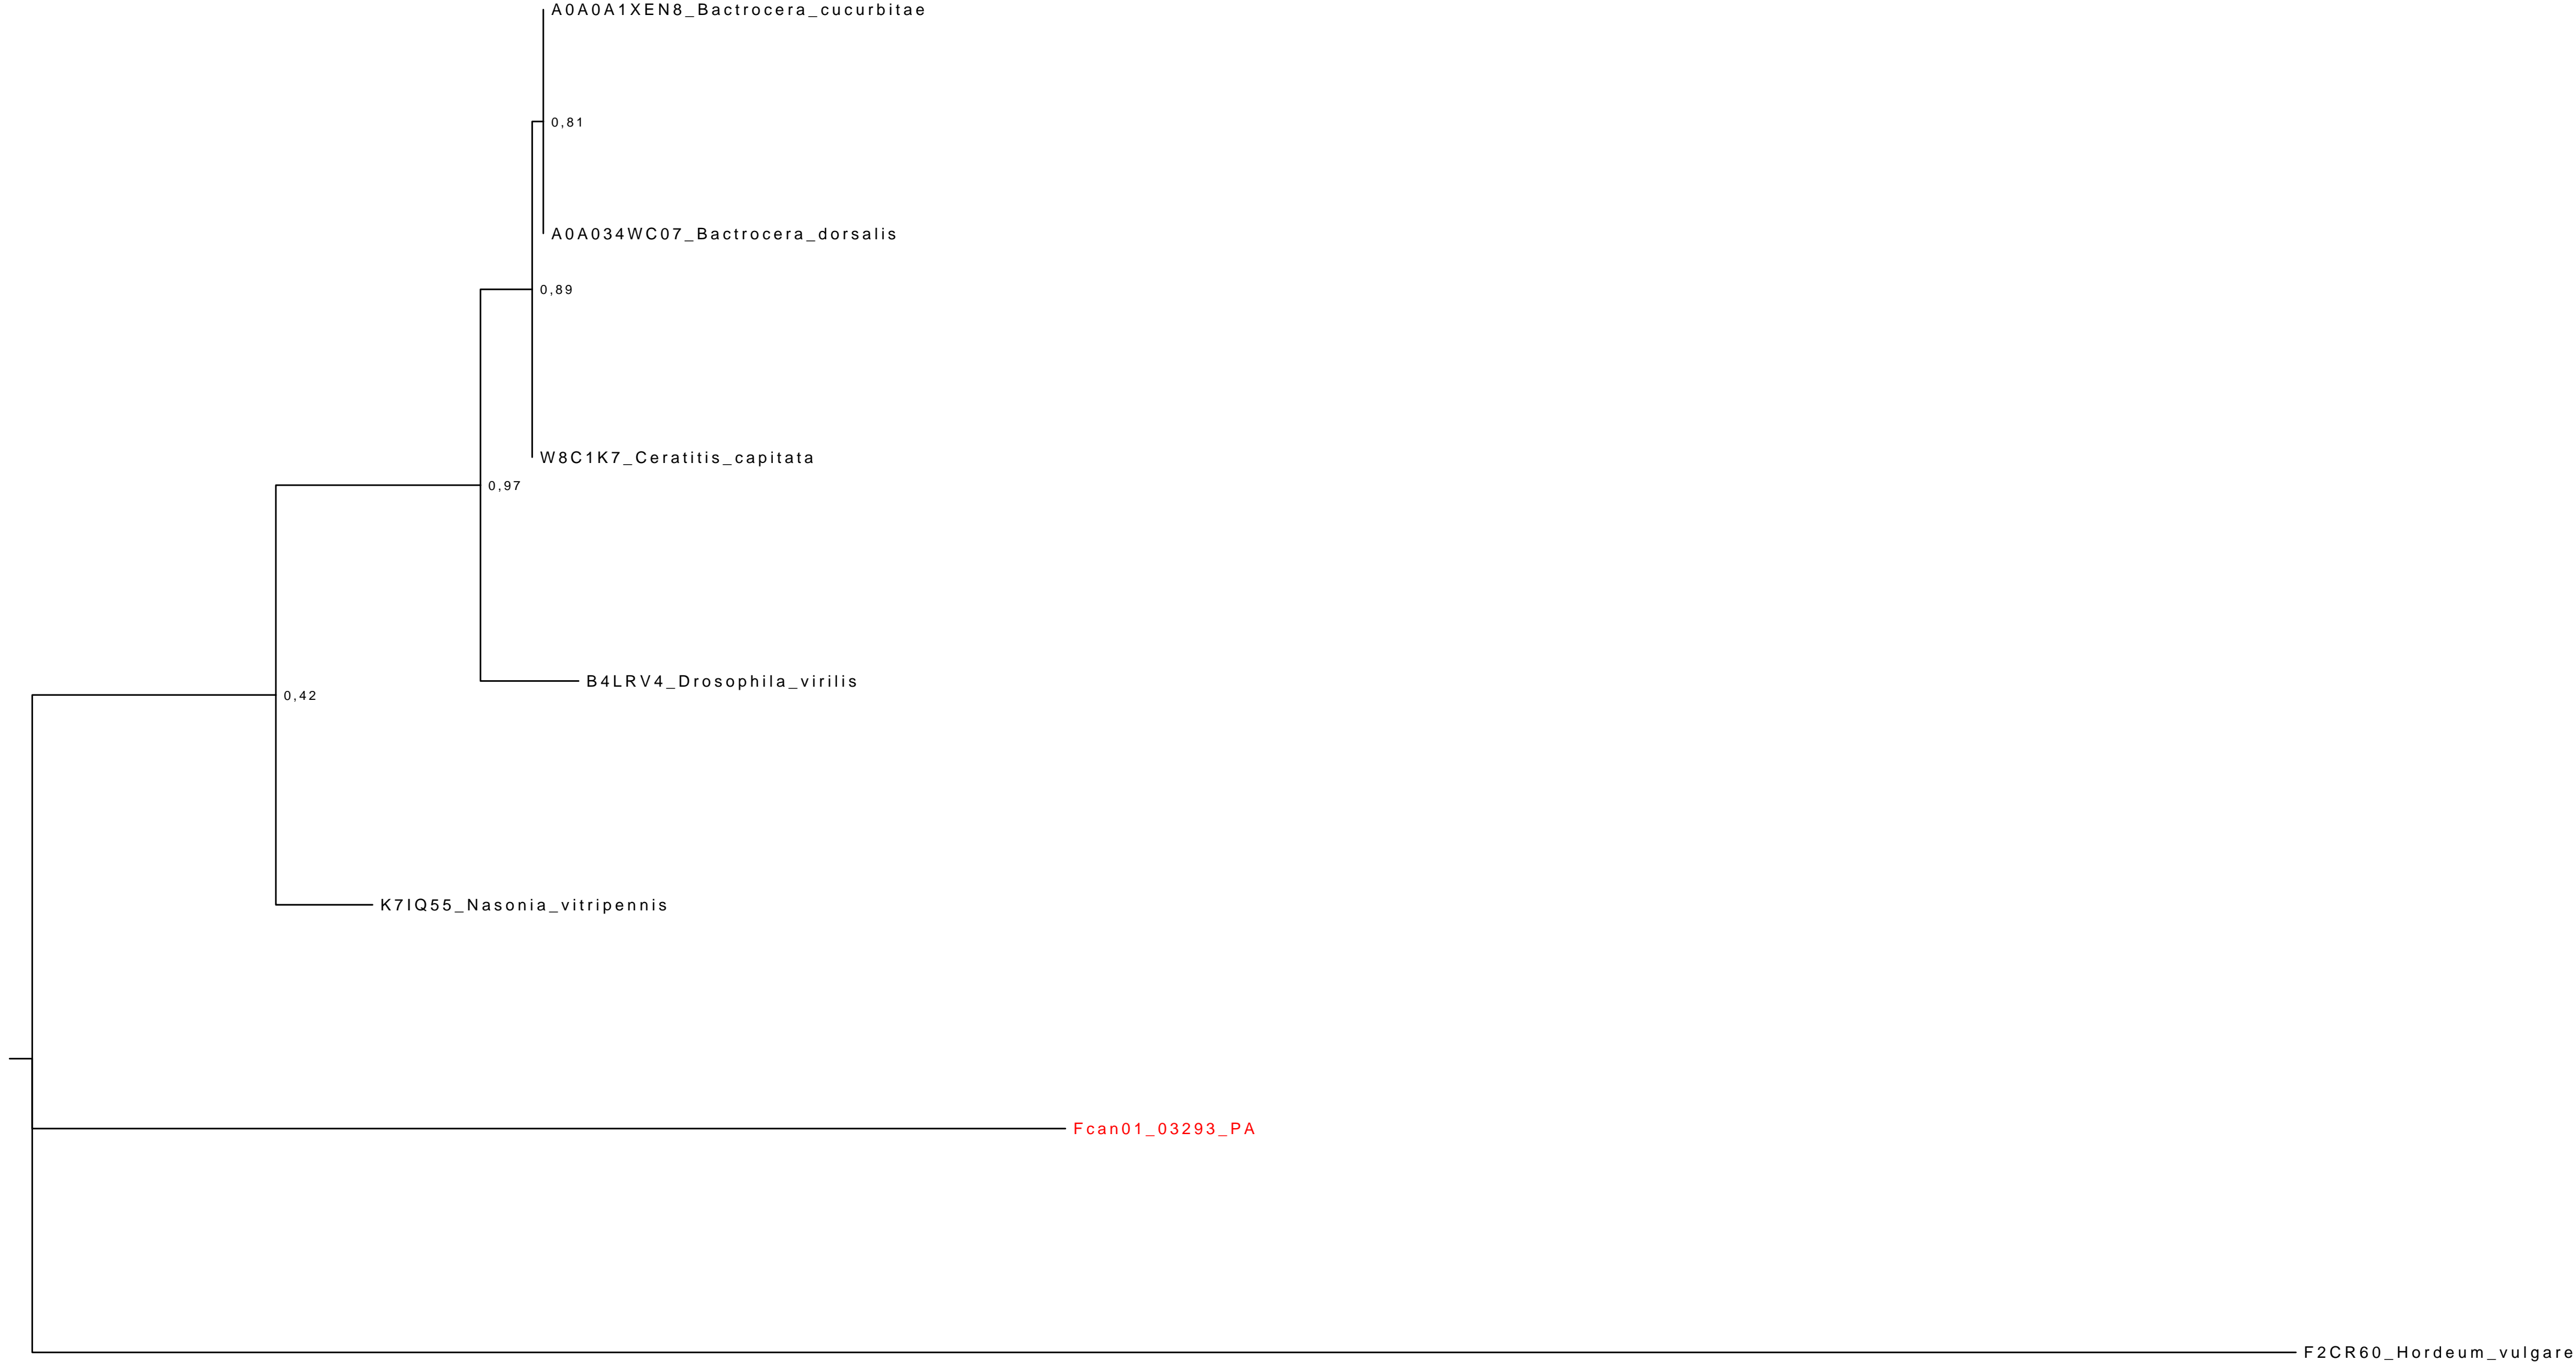

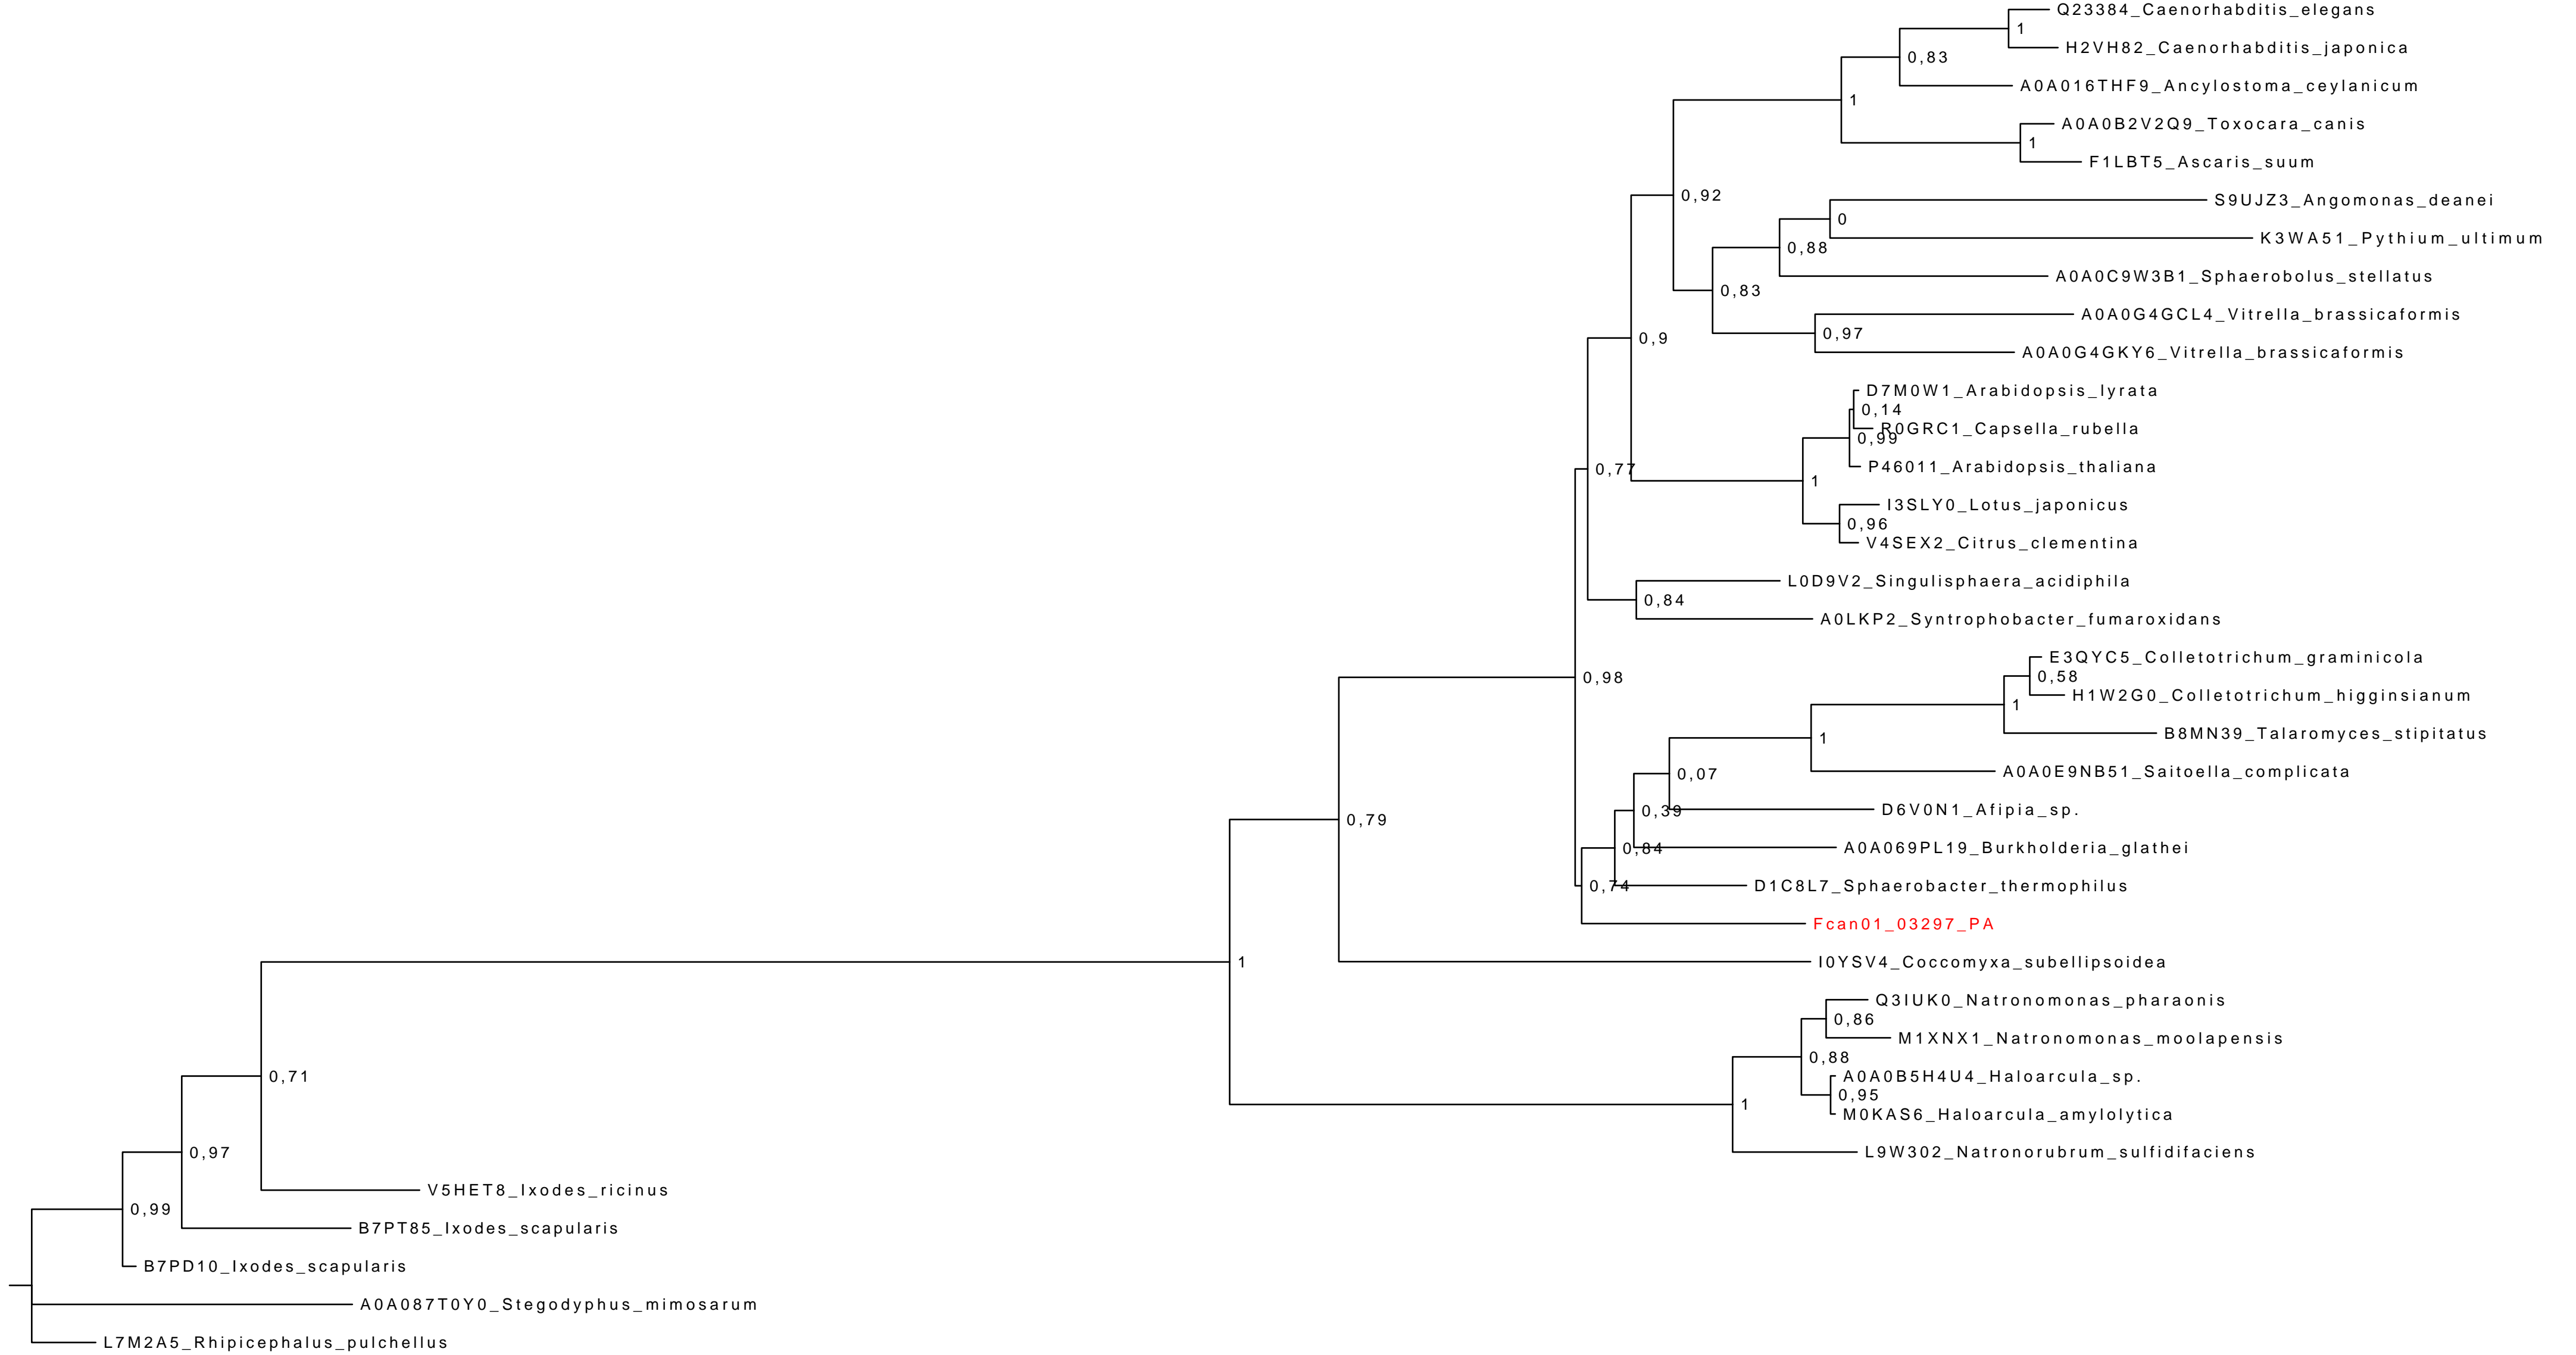

0.4

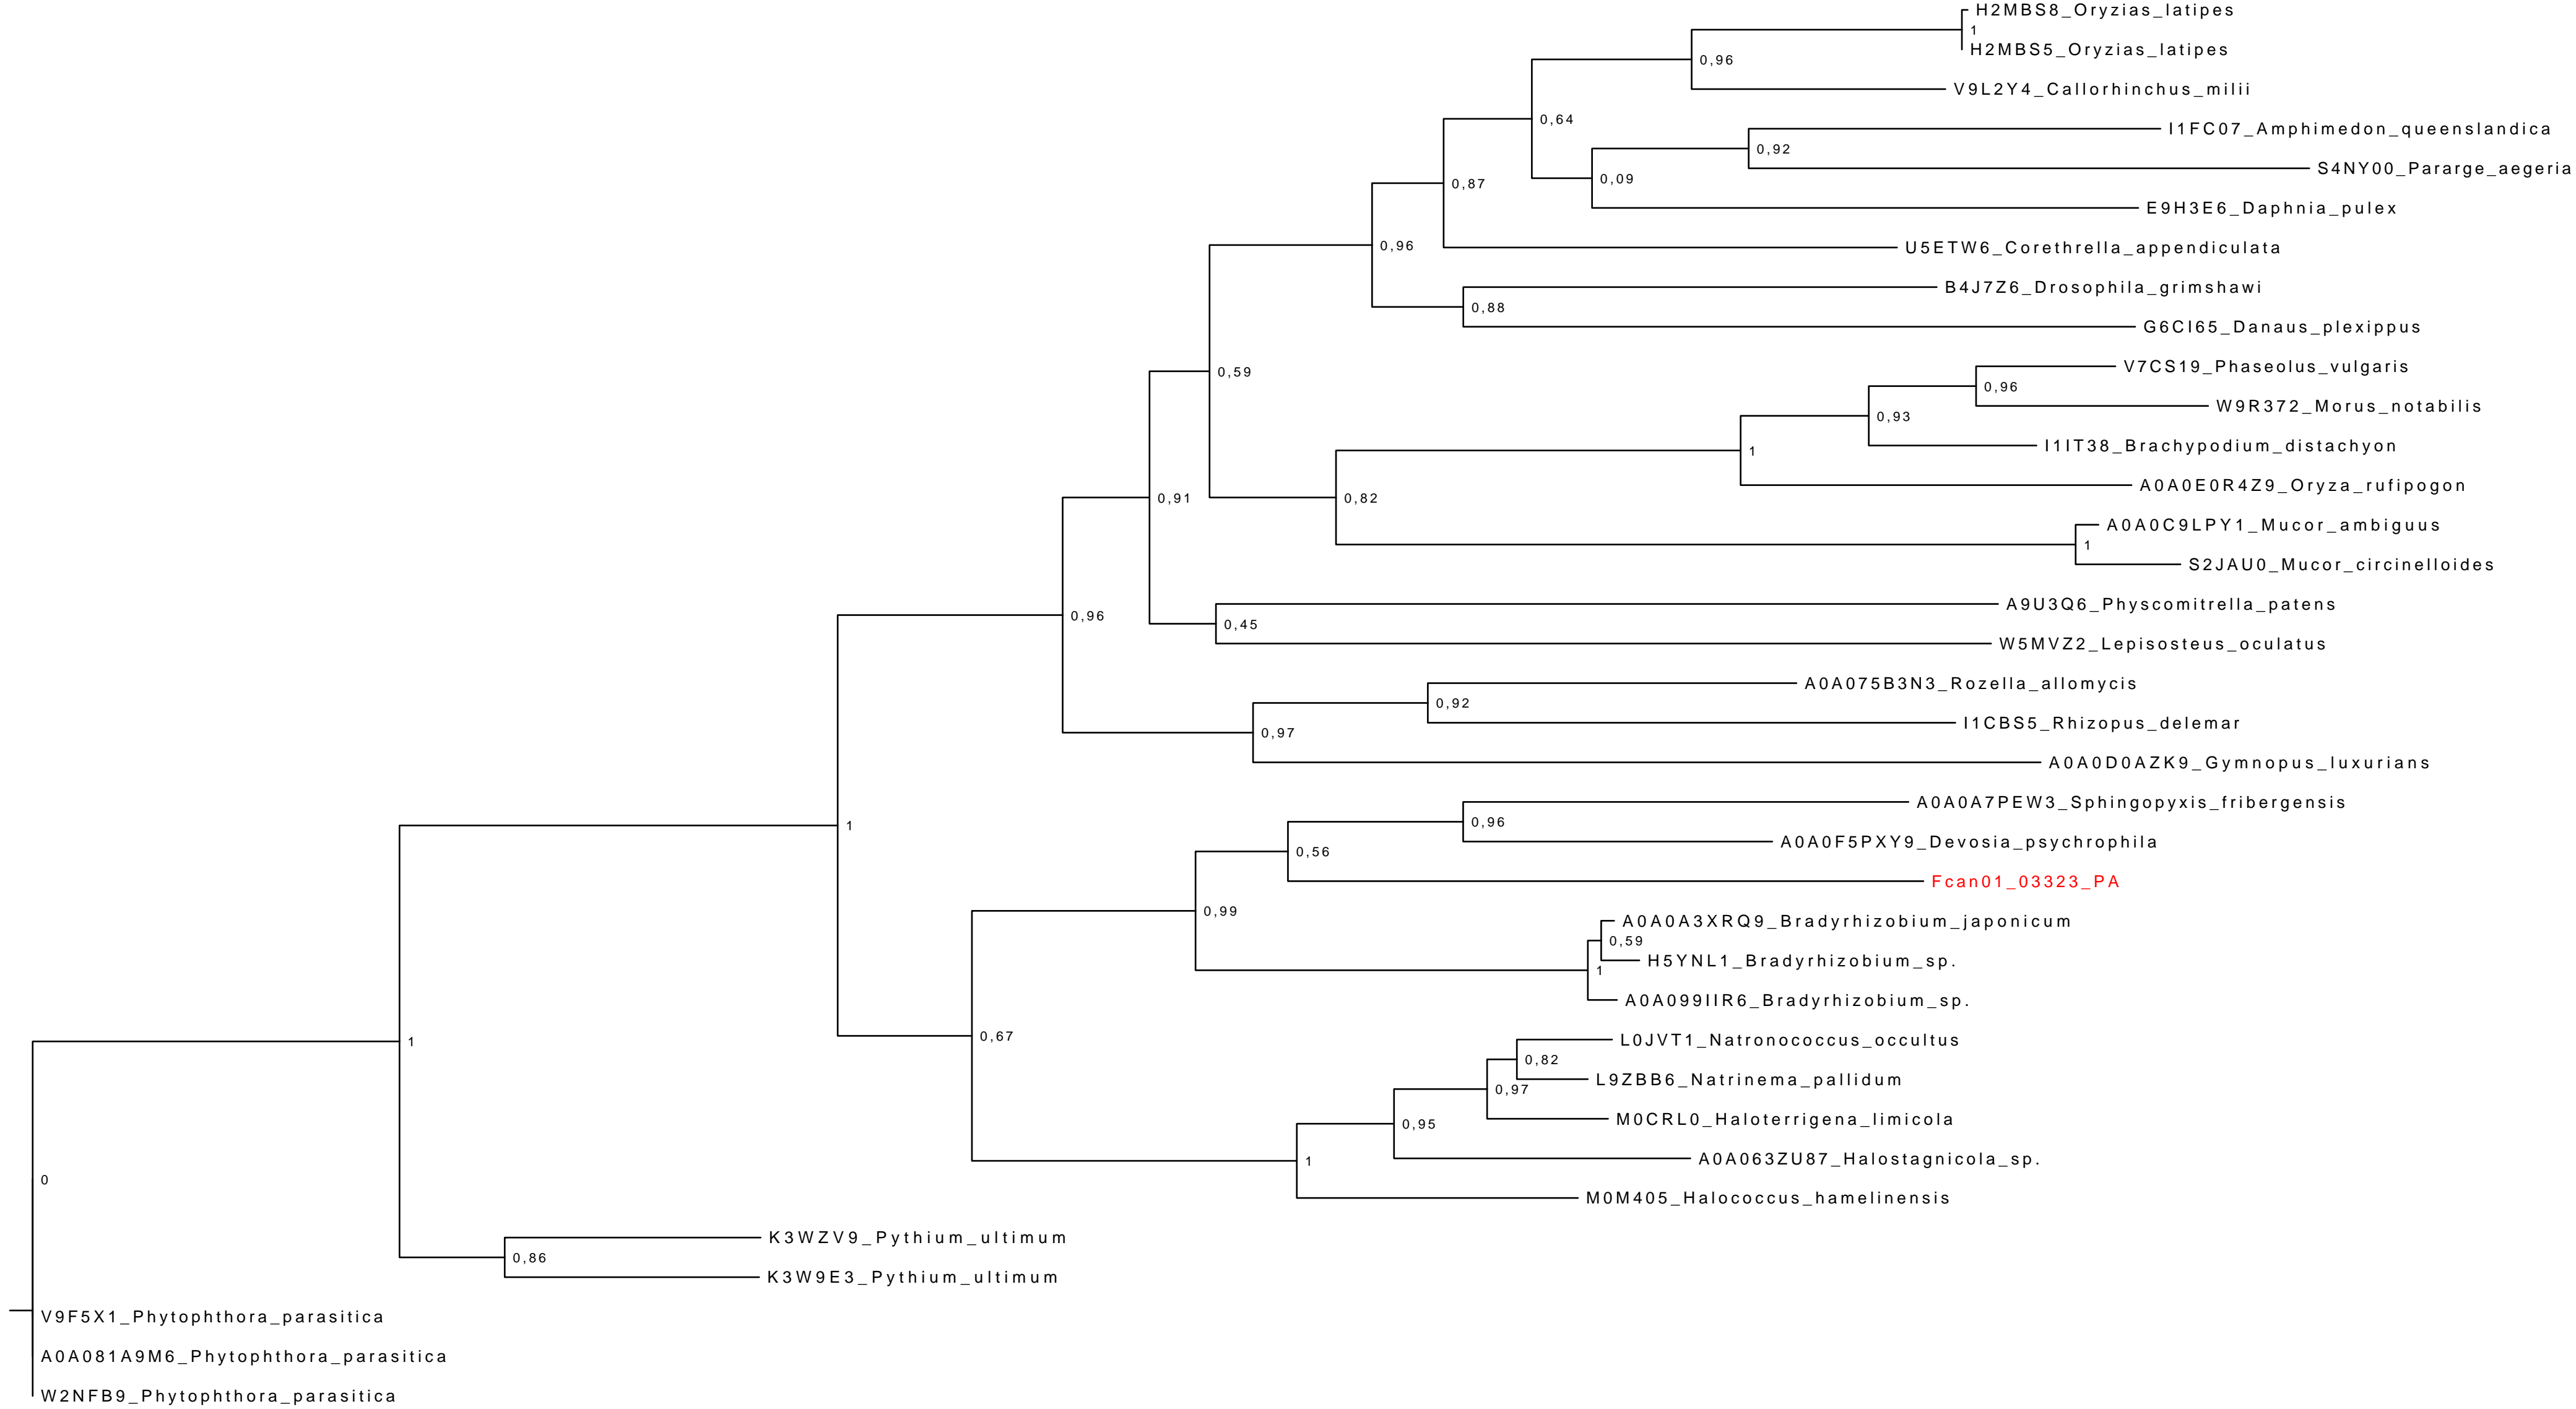

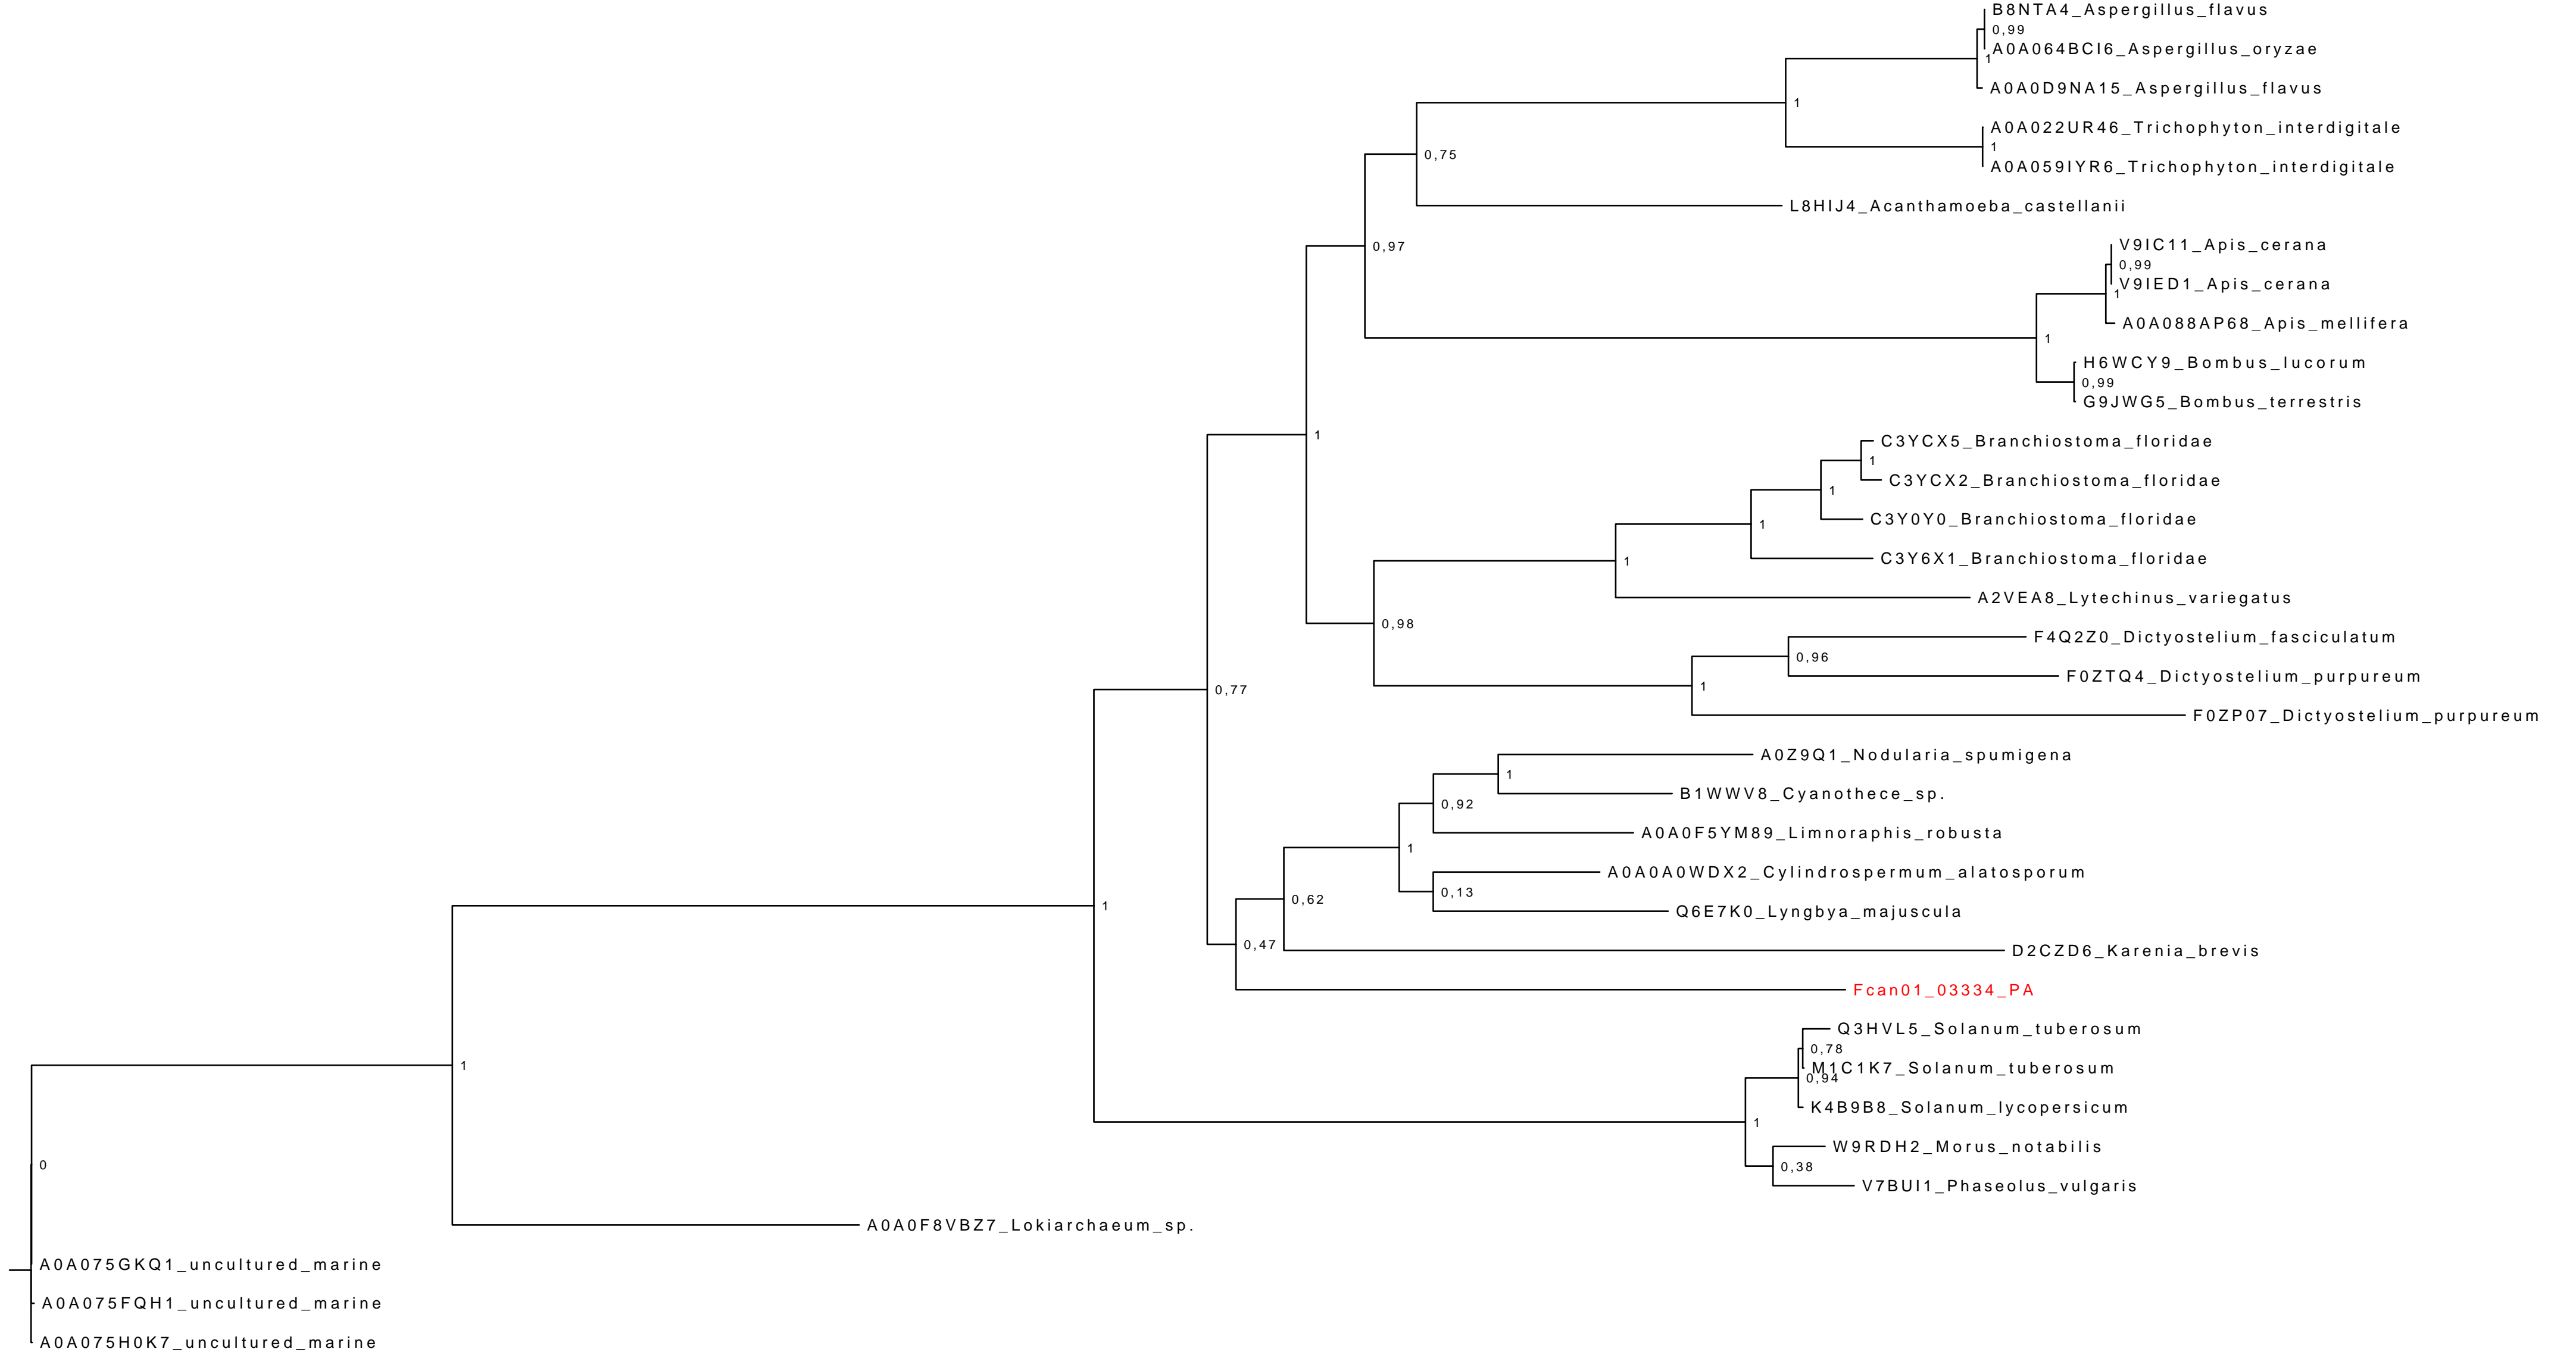

0.6

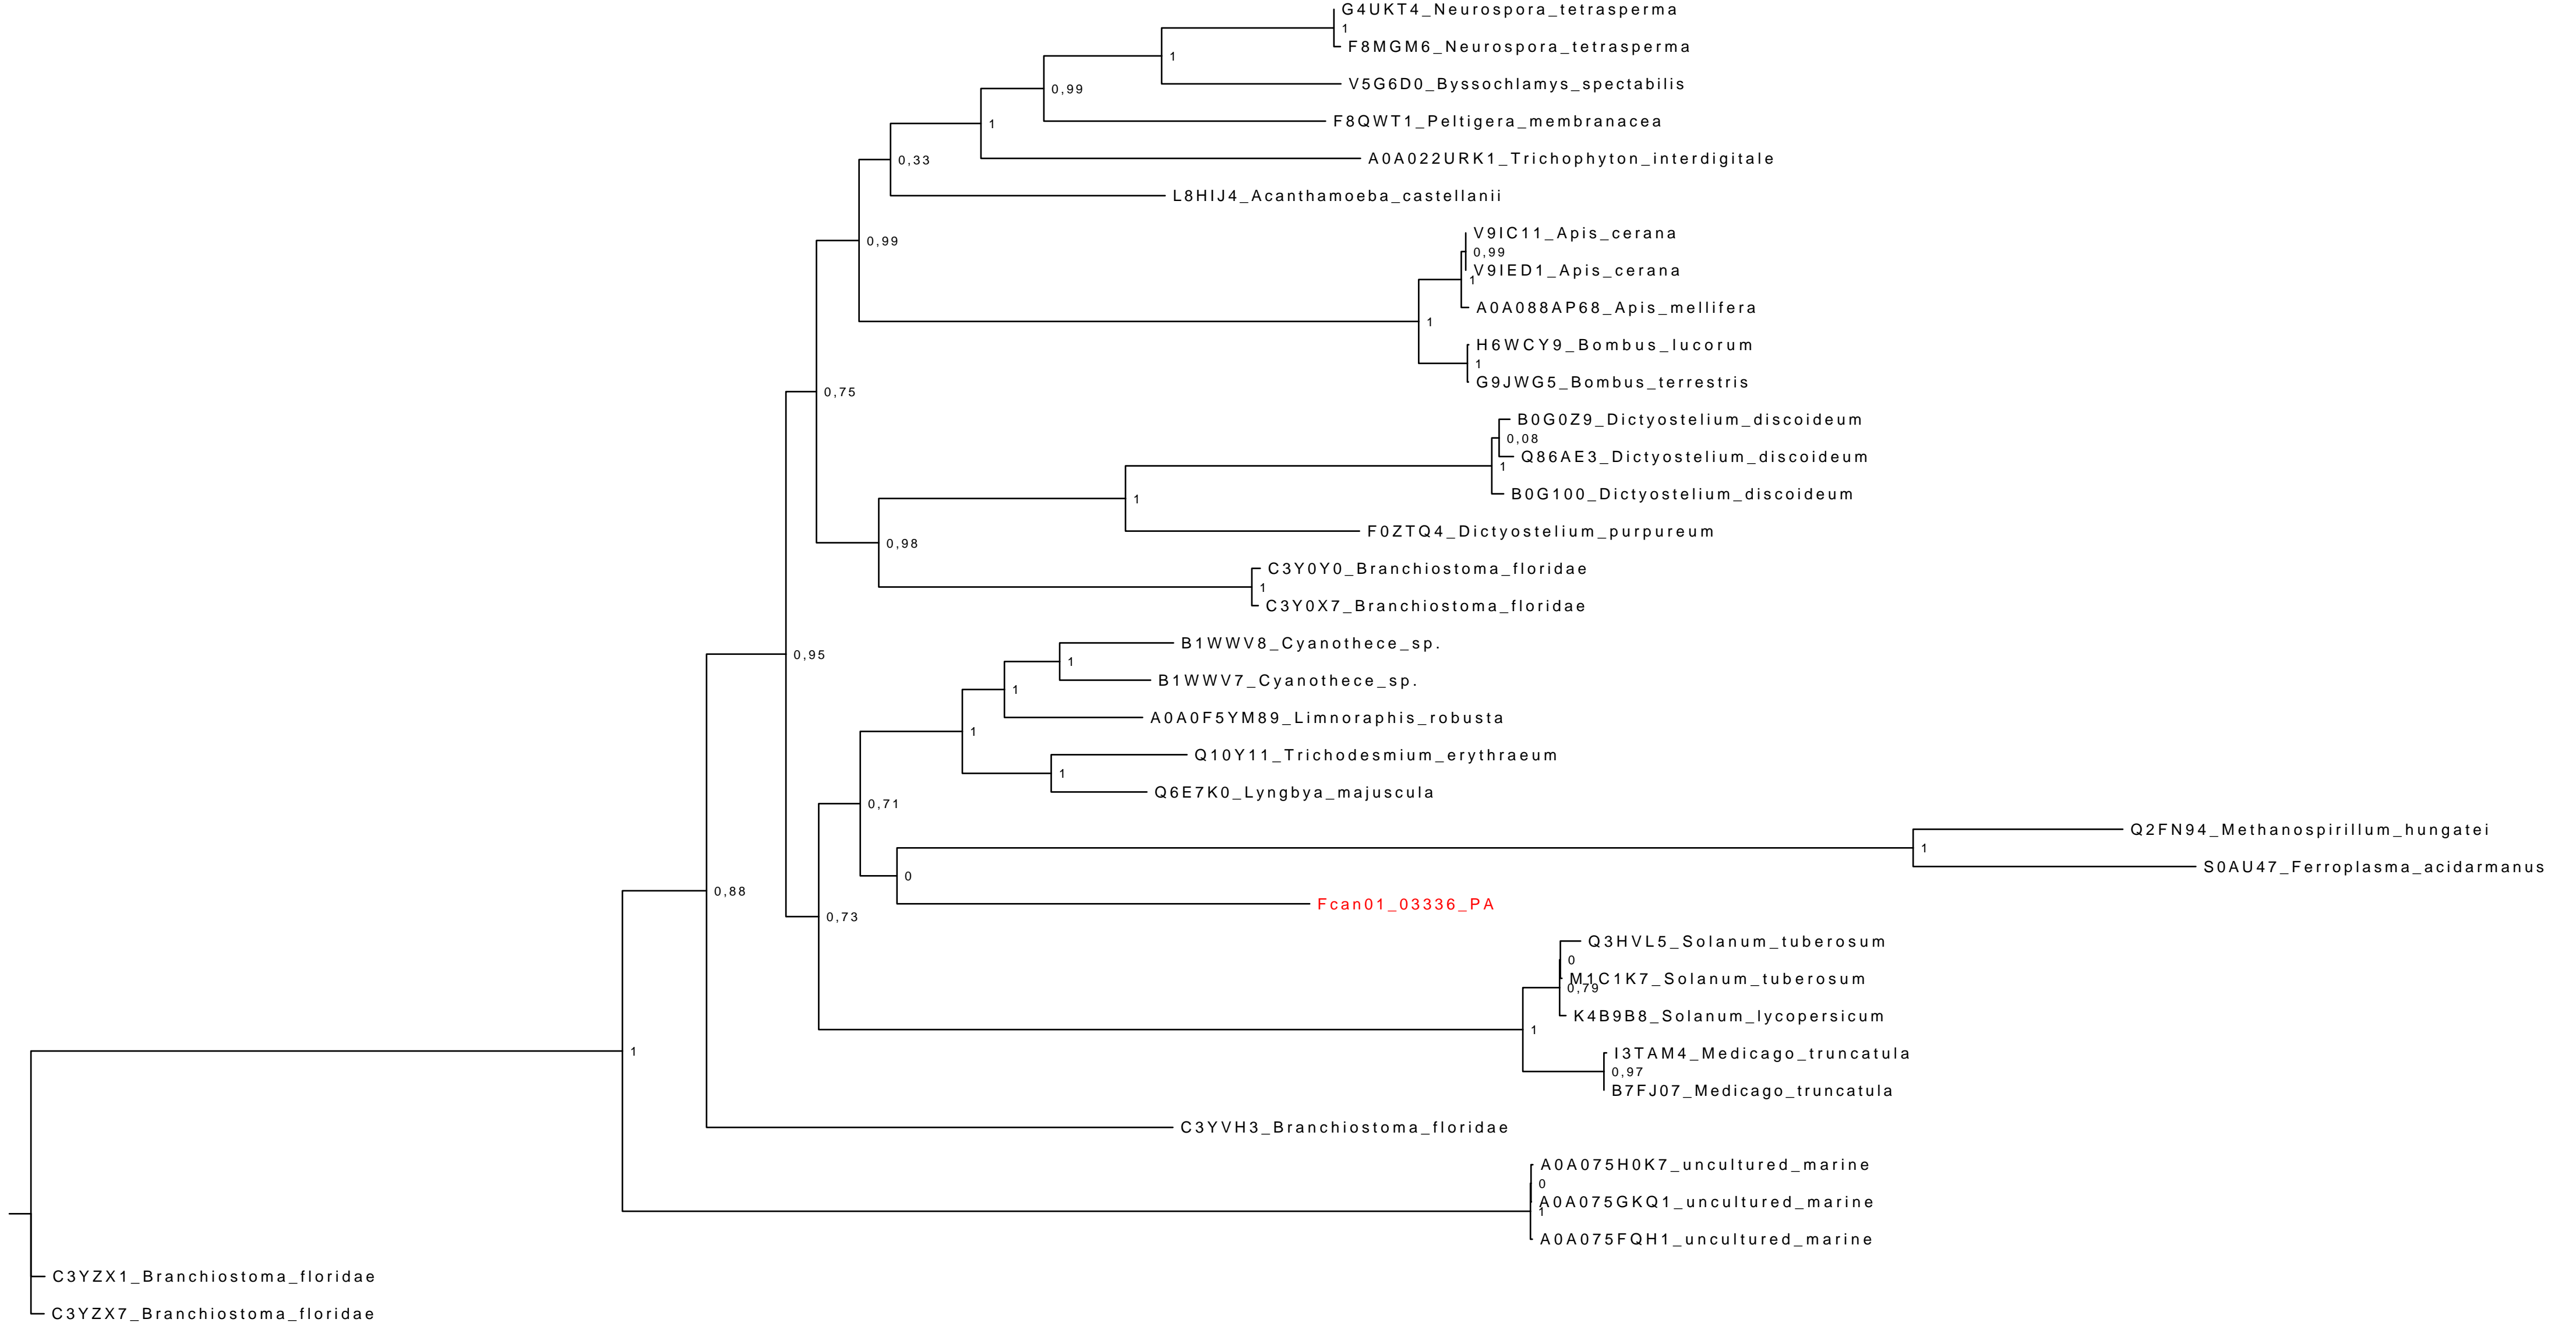

0.7

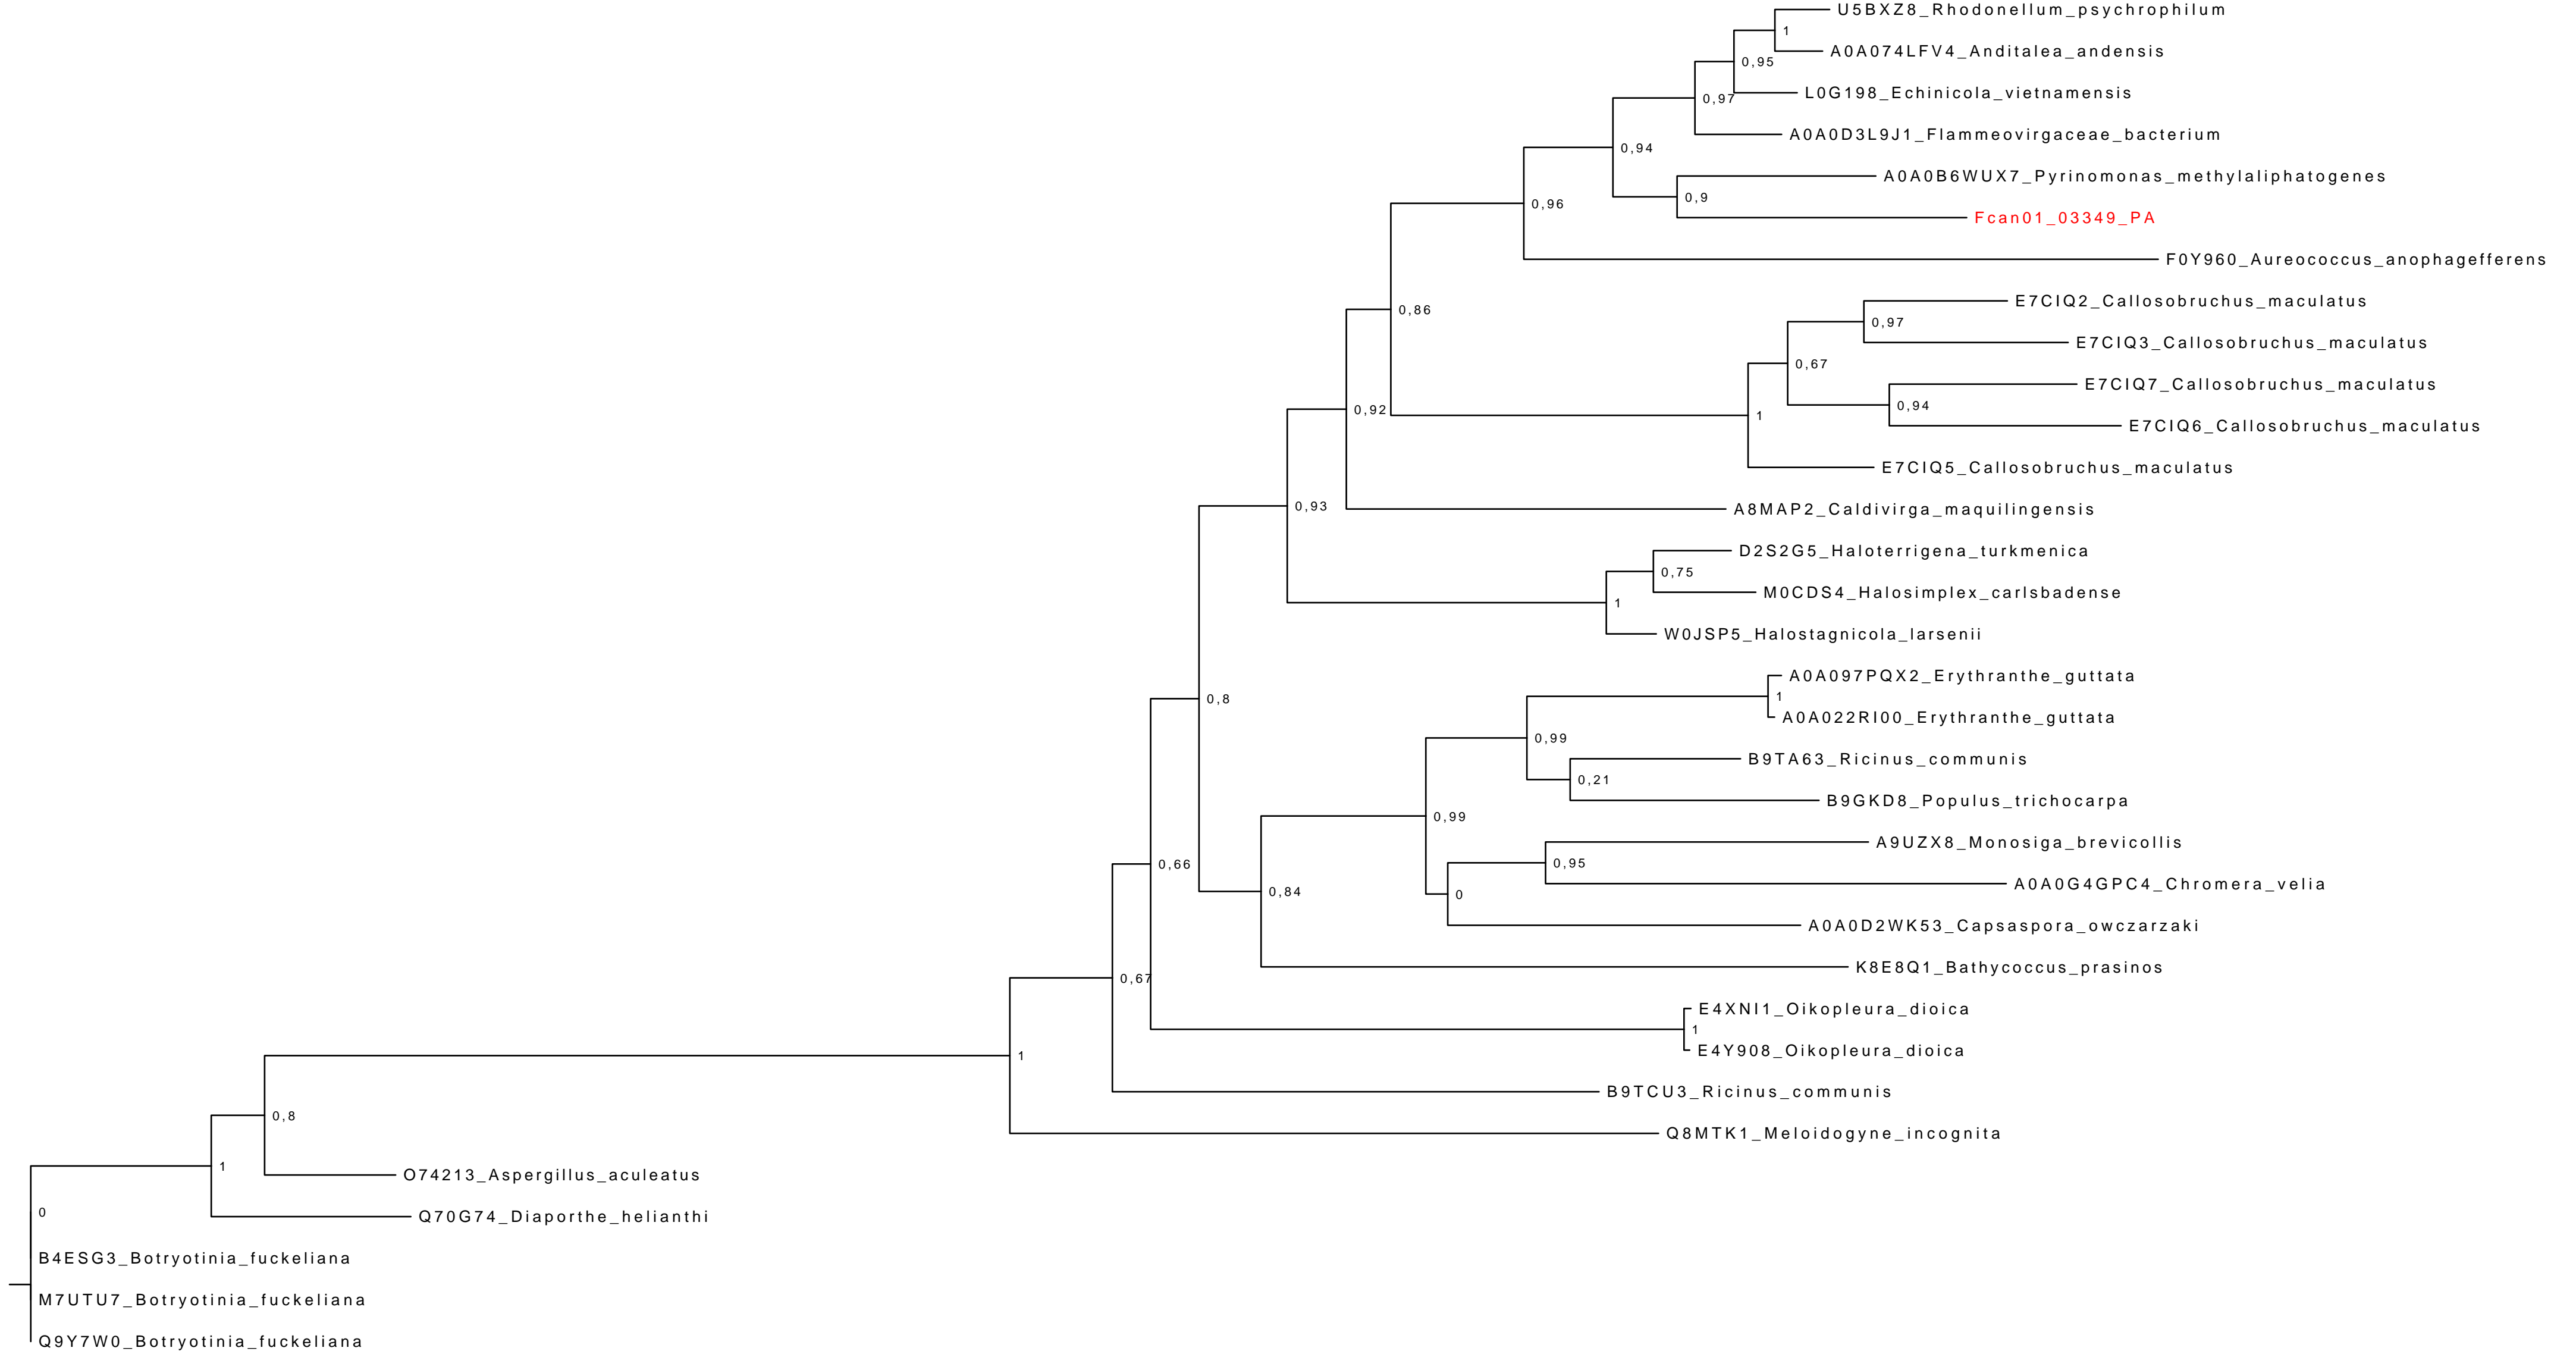

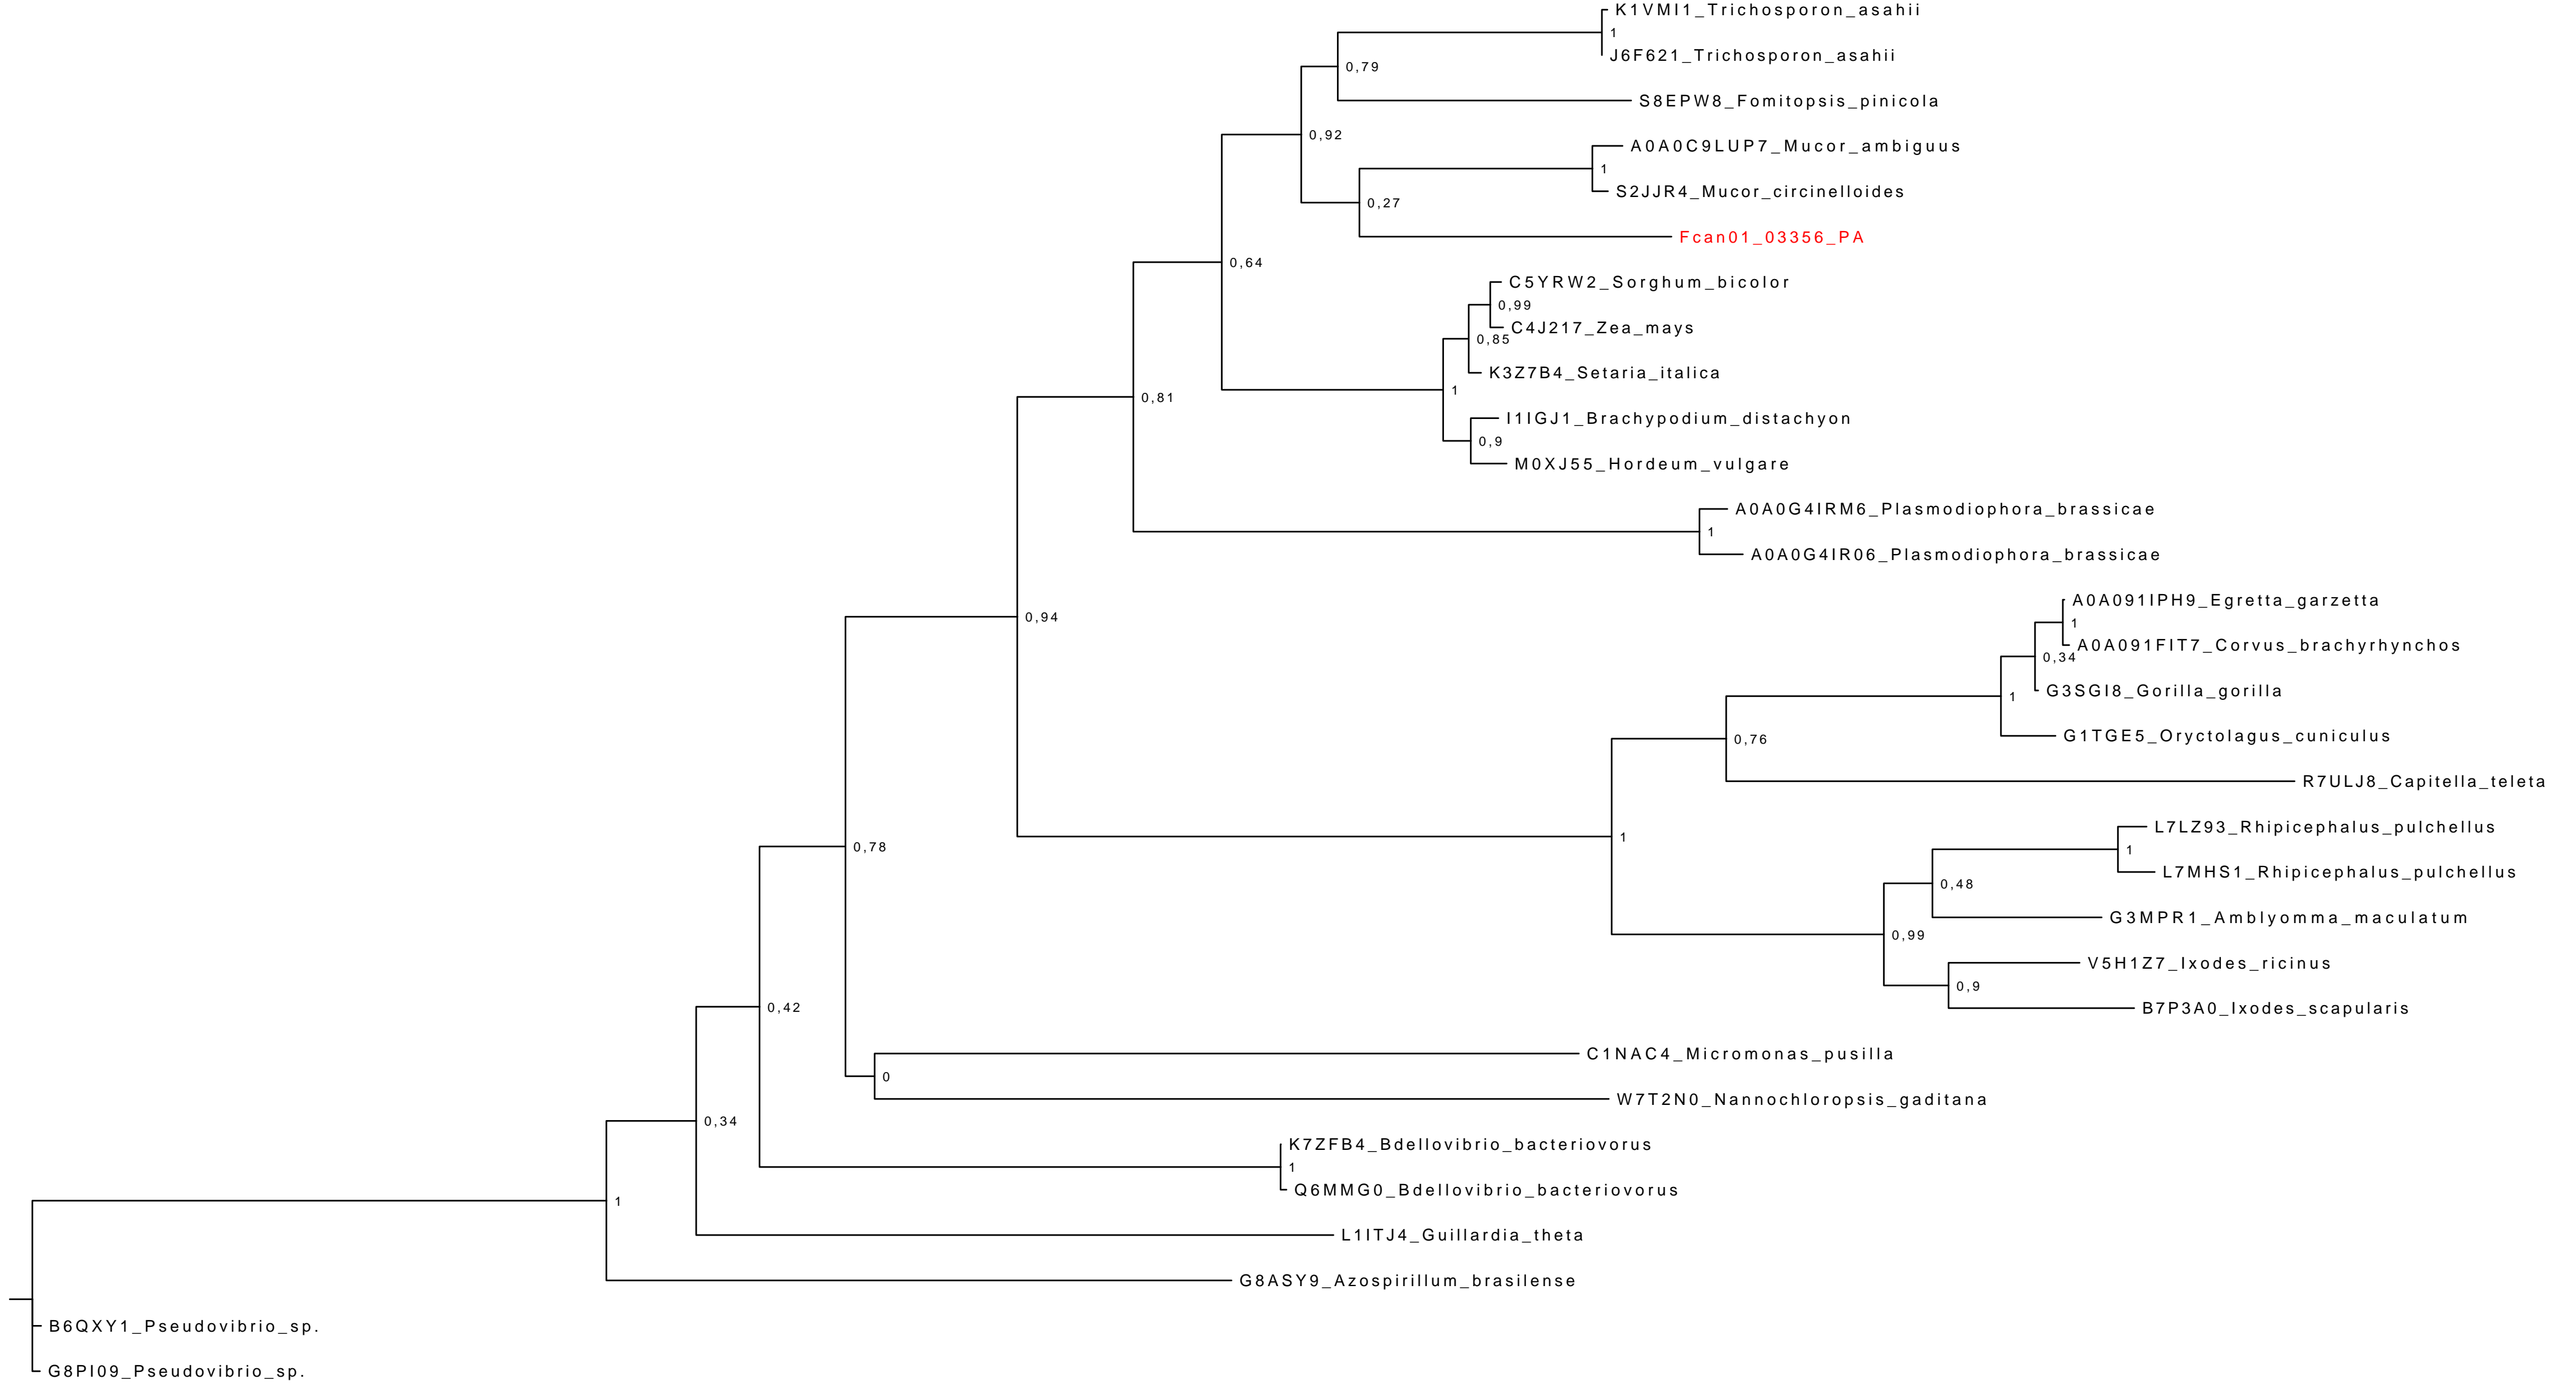



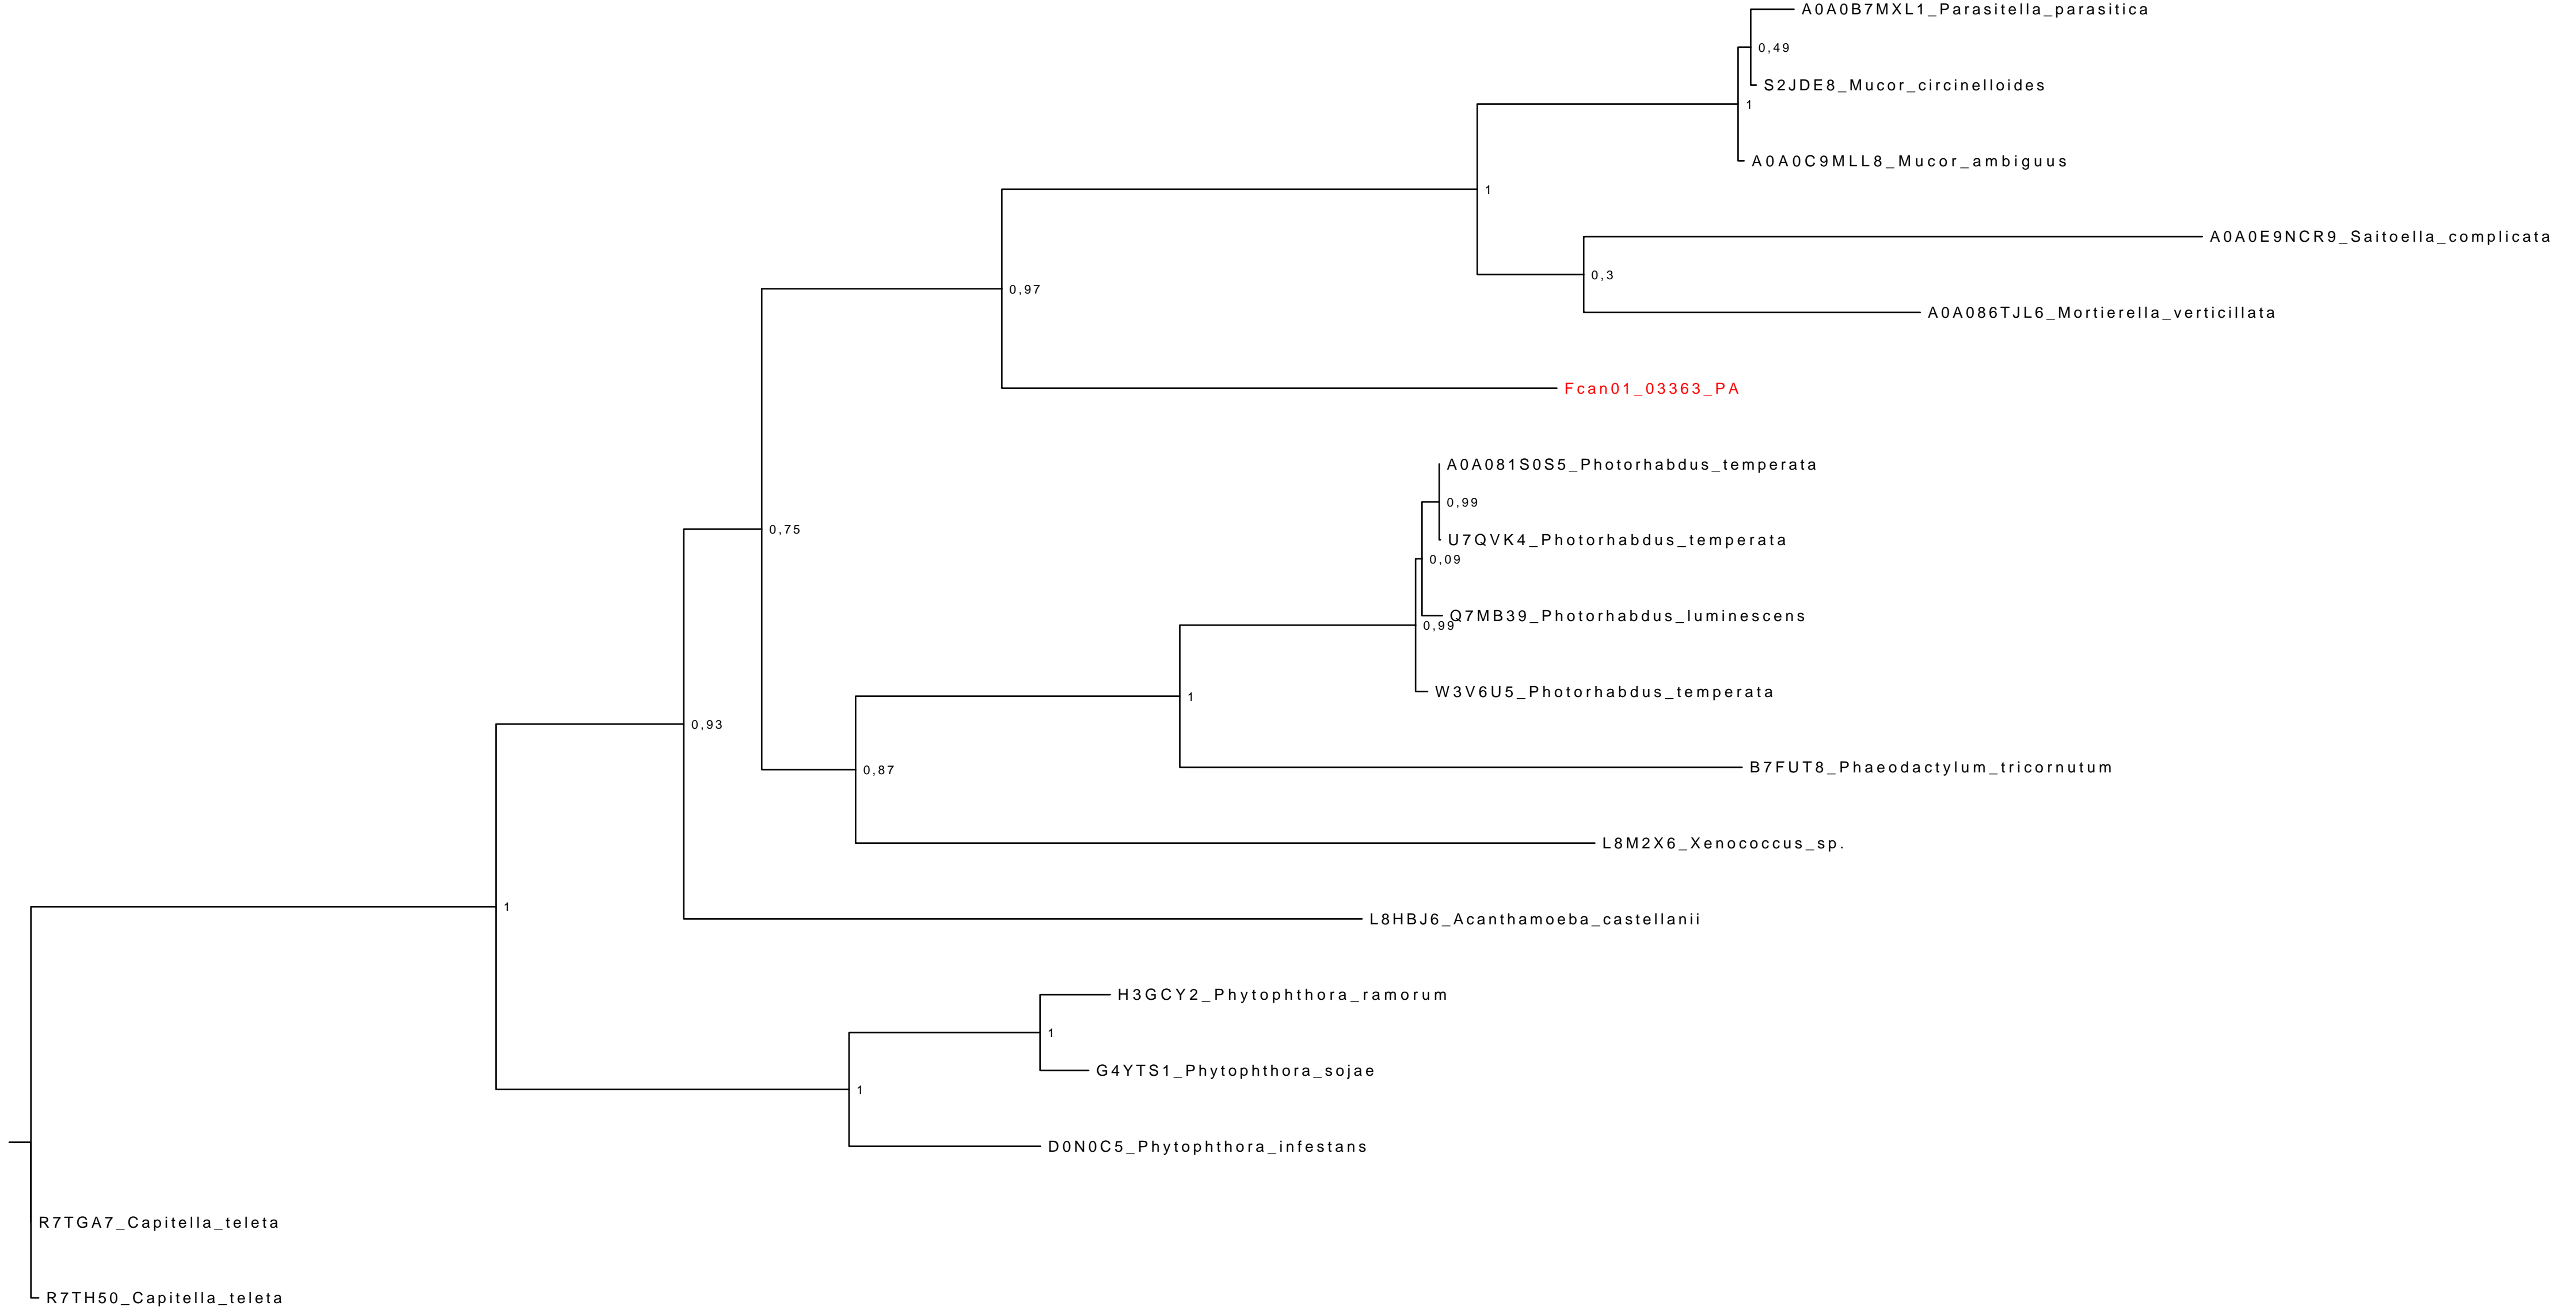

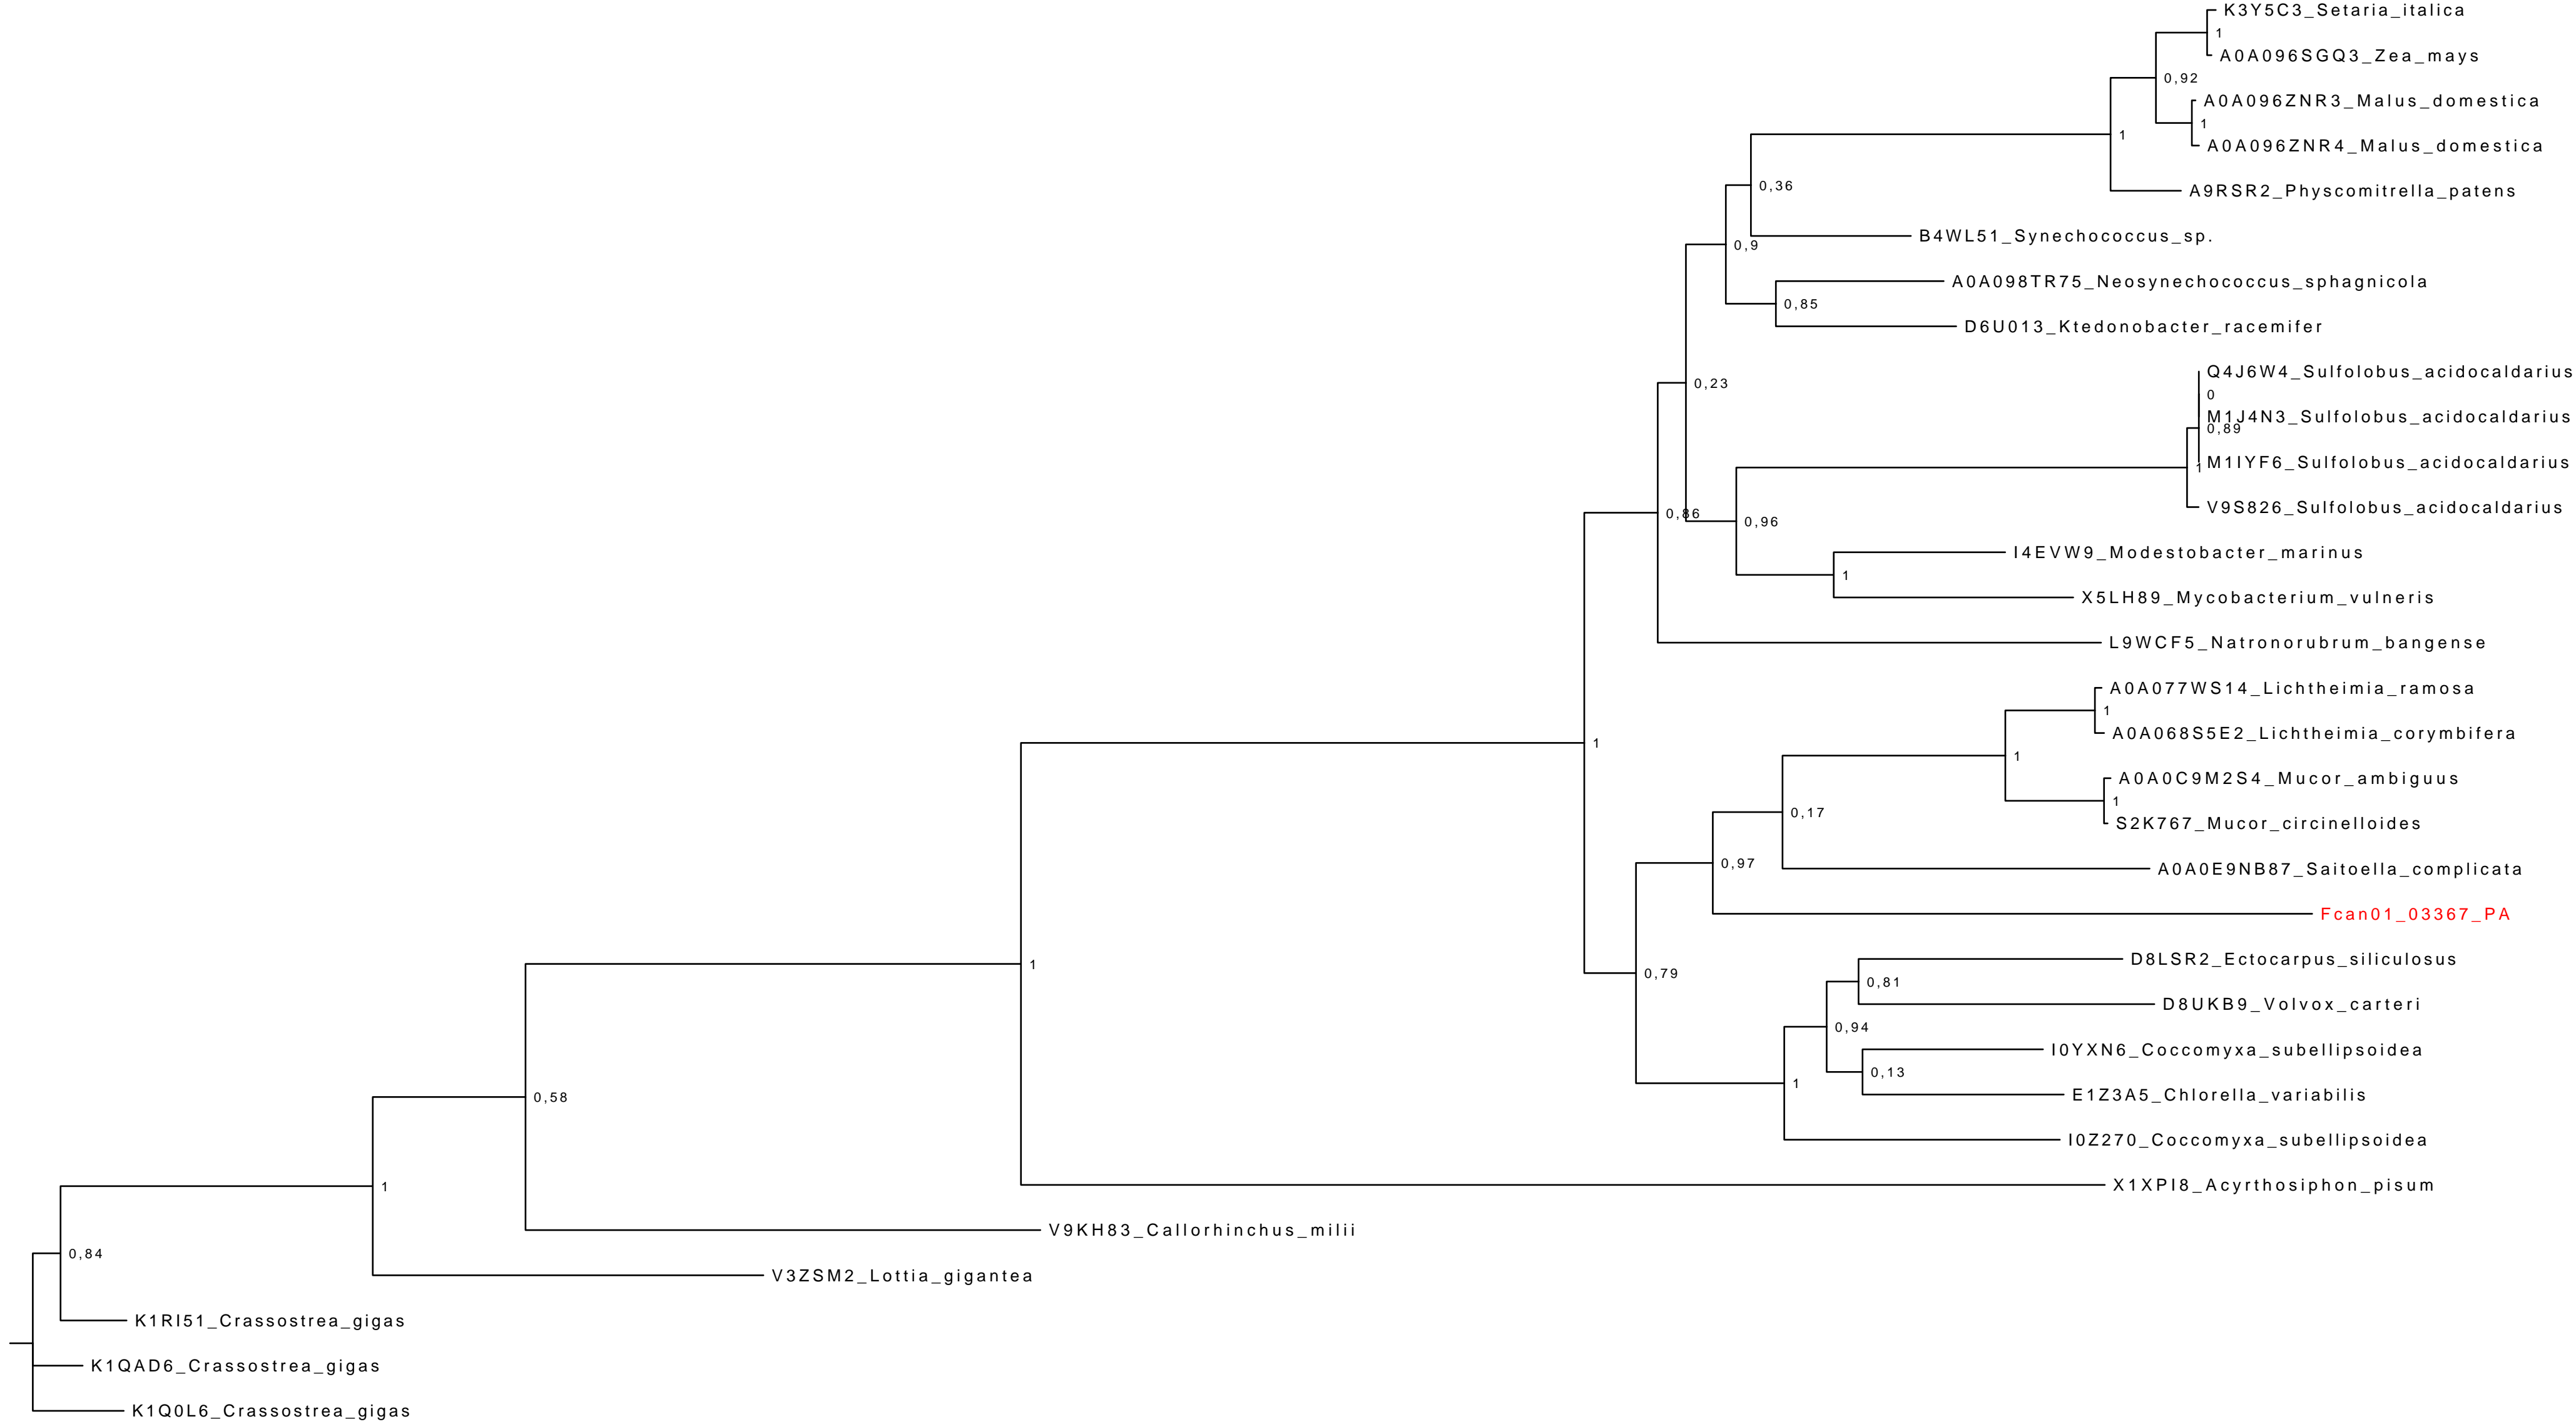

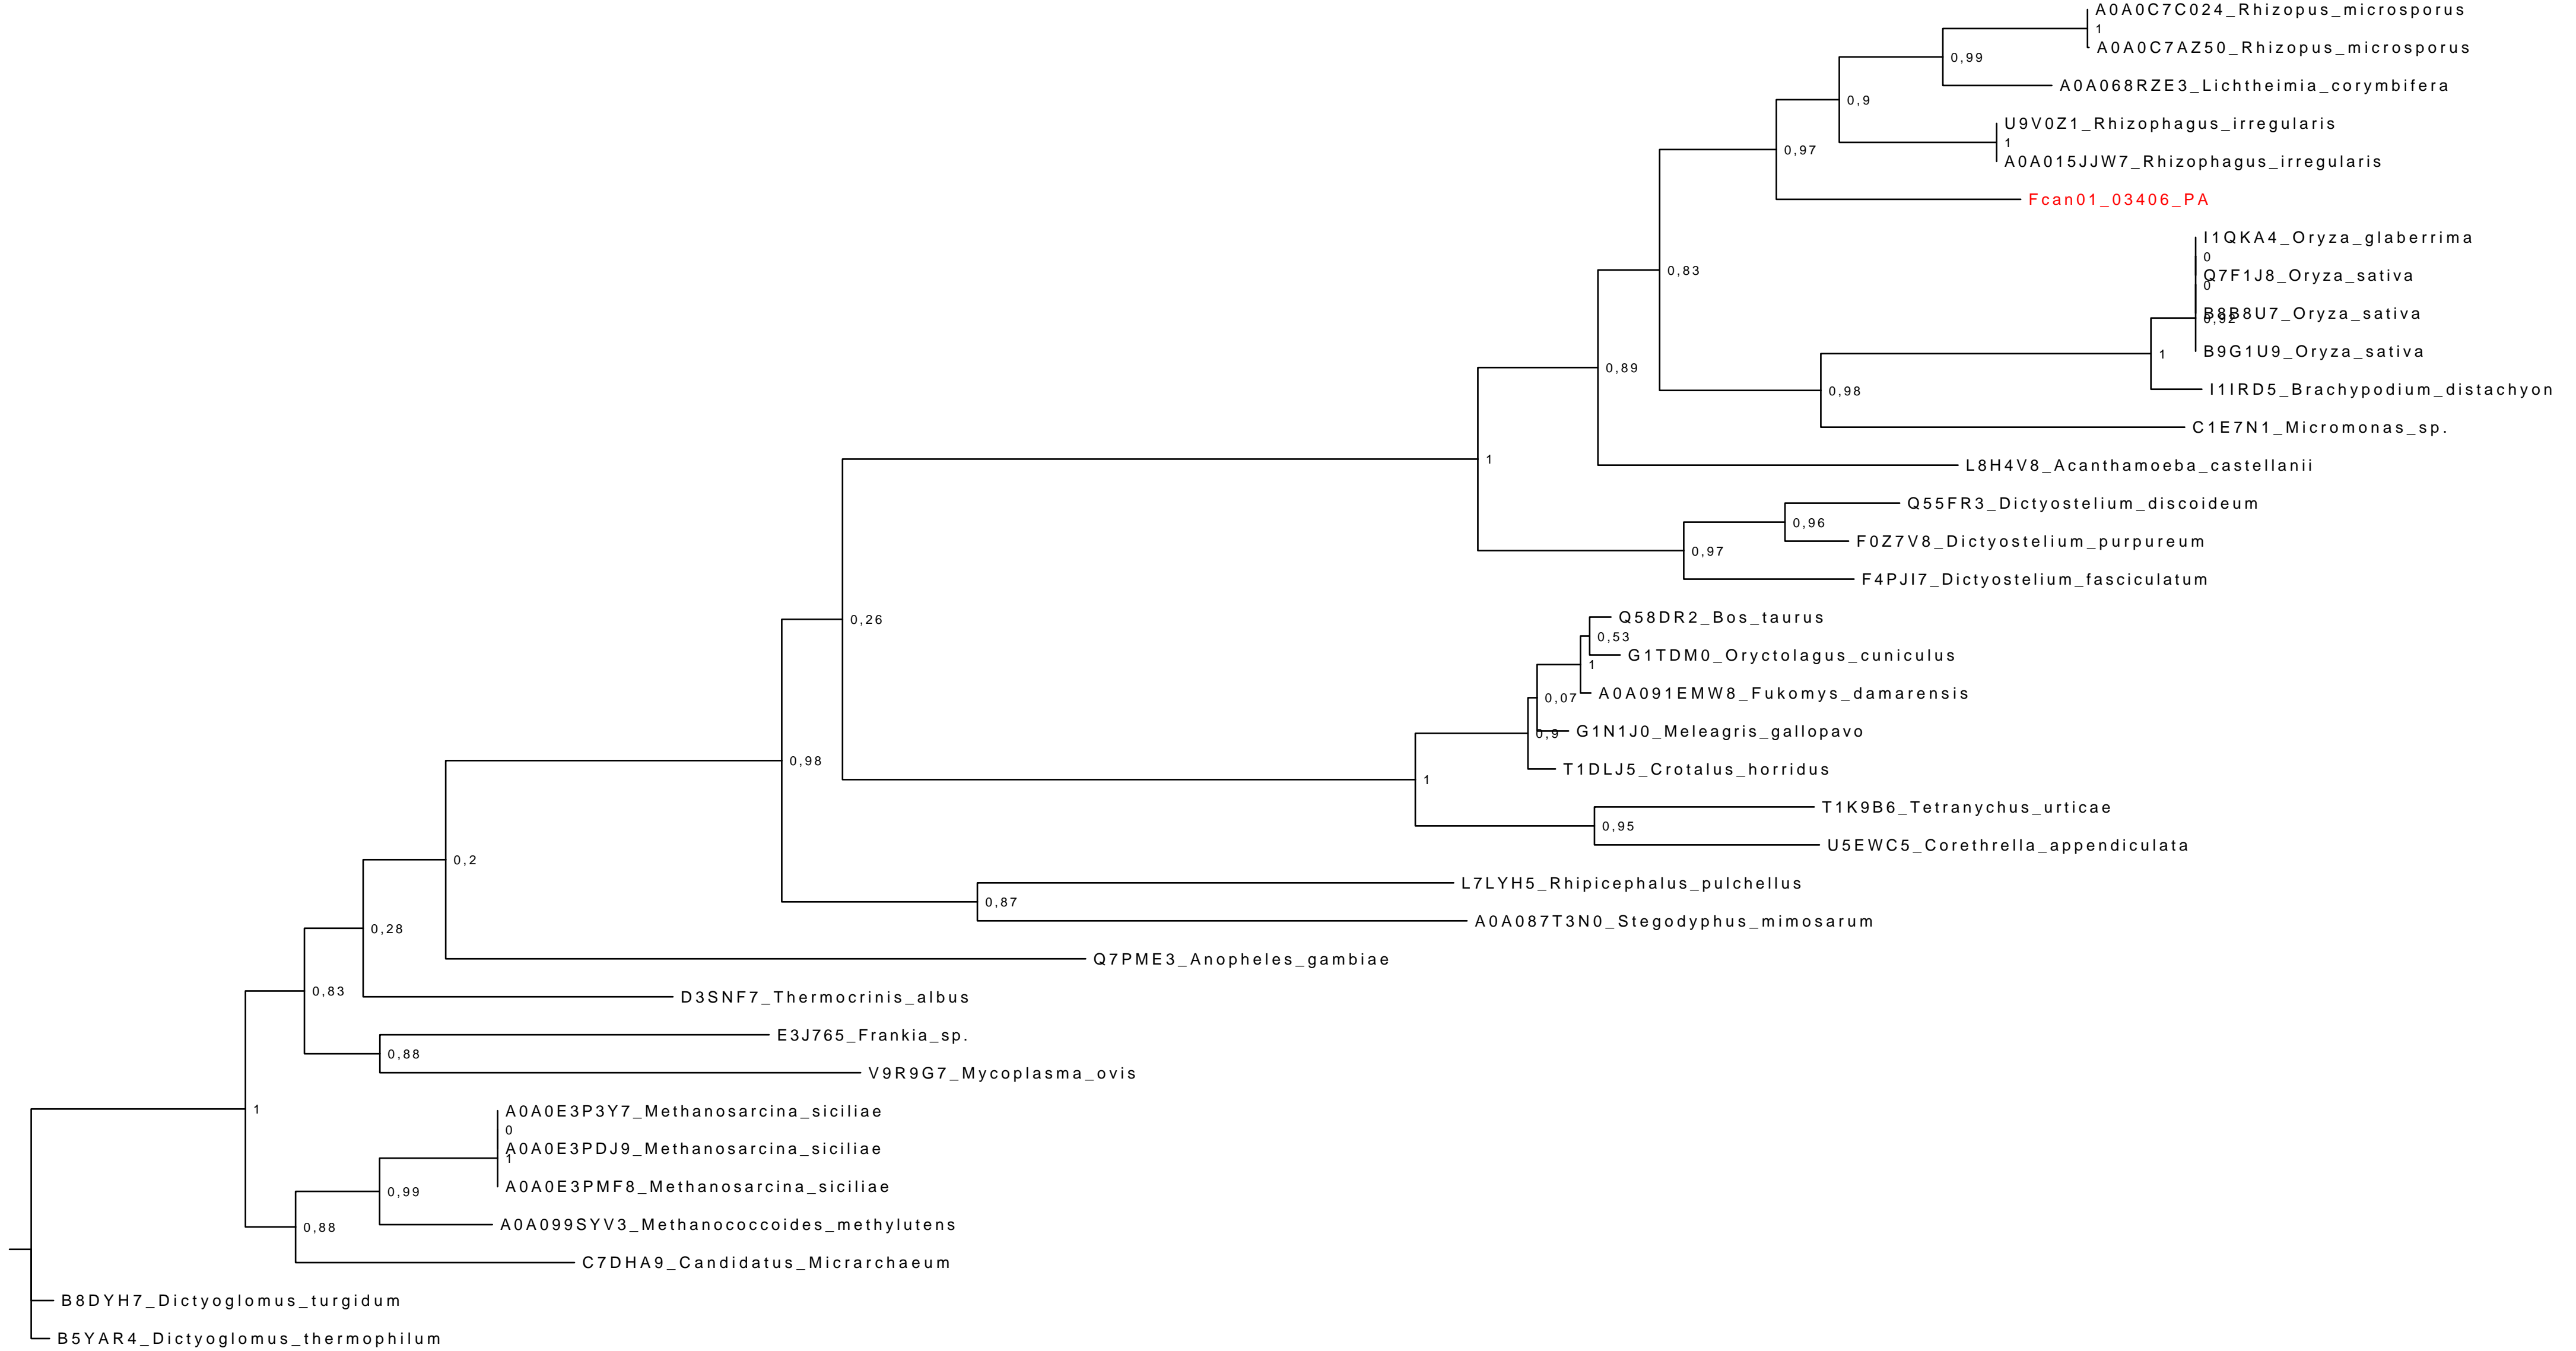

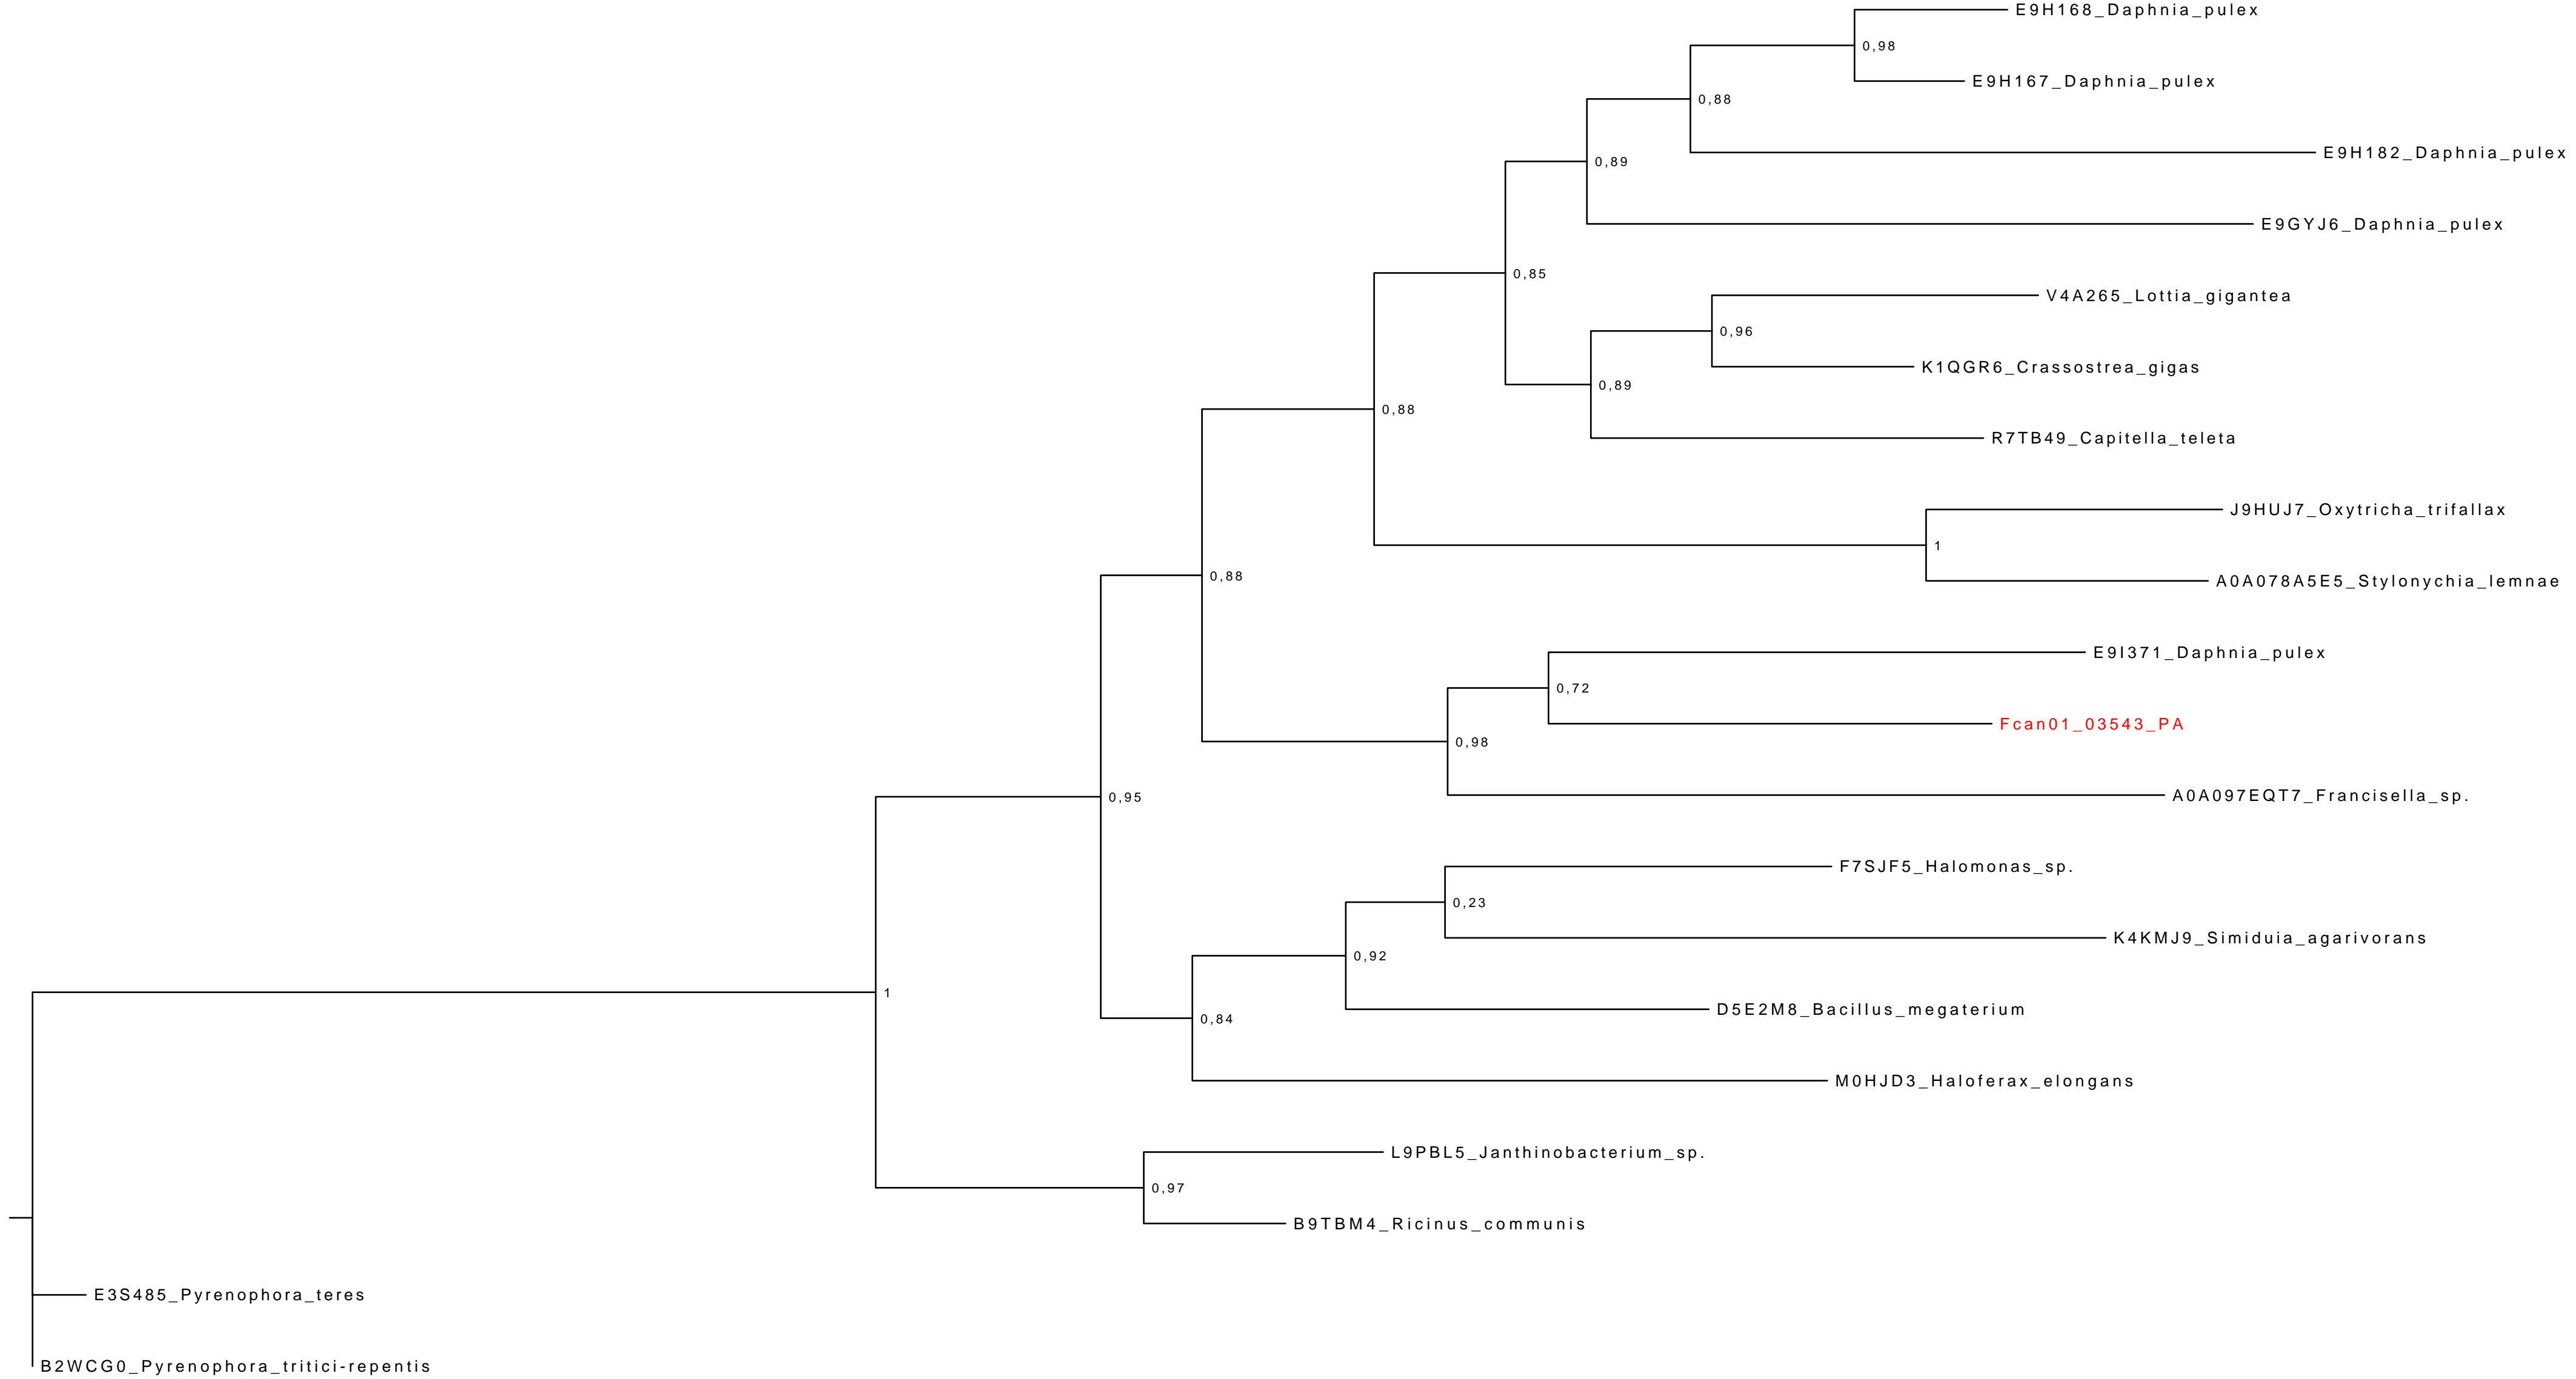

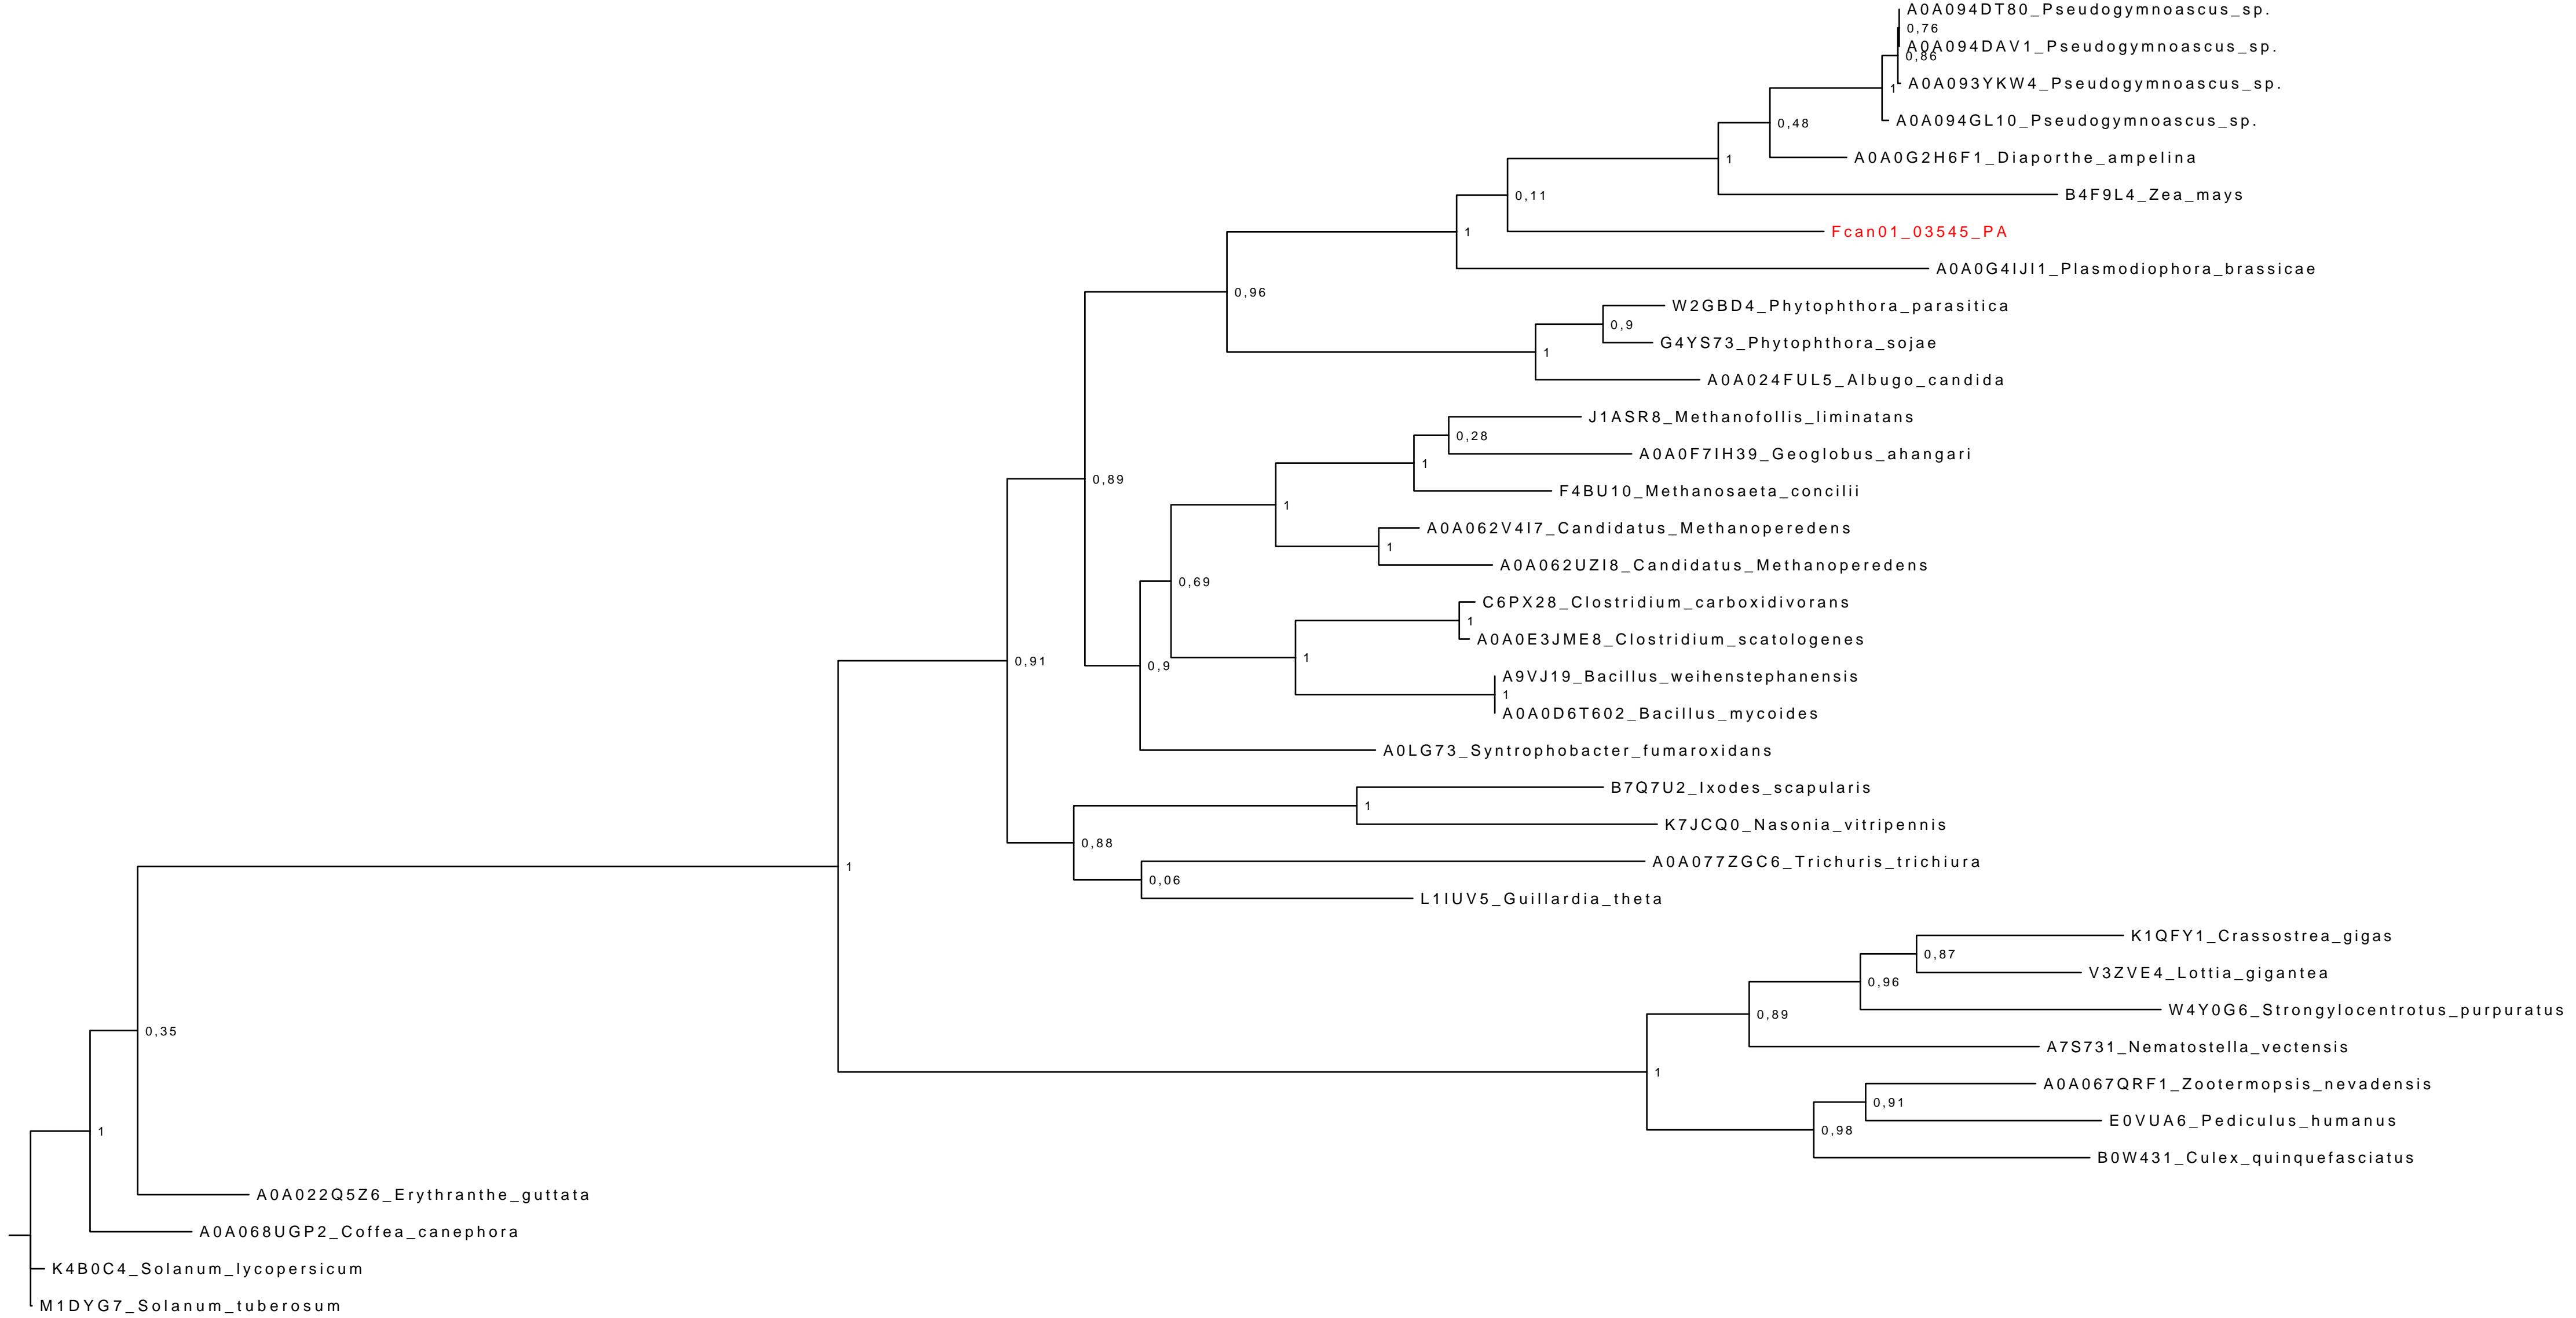

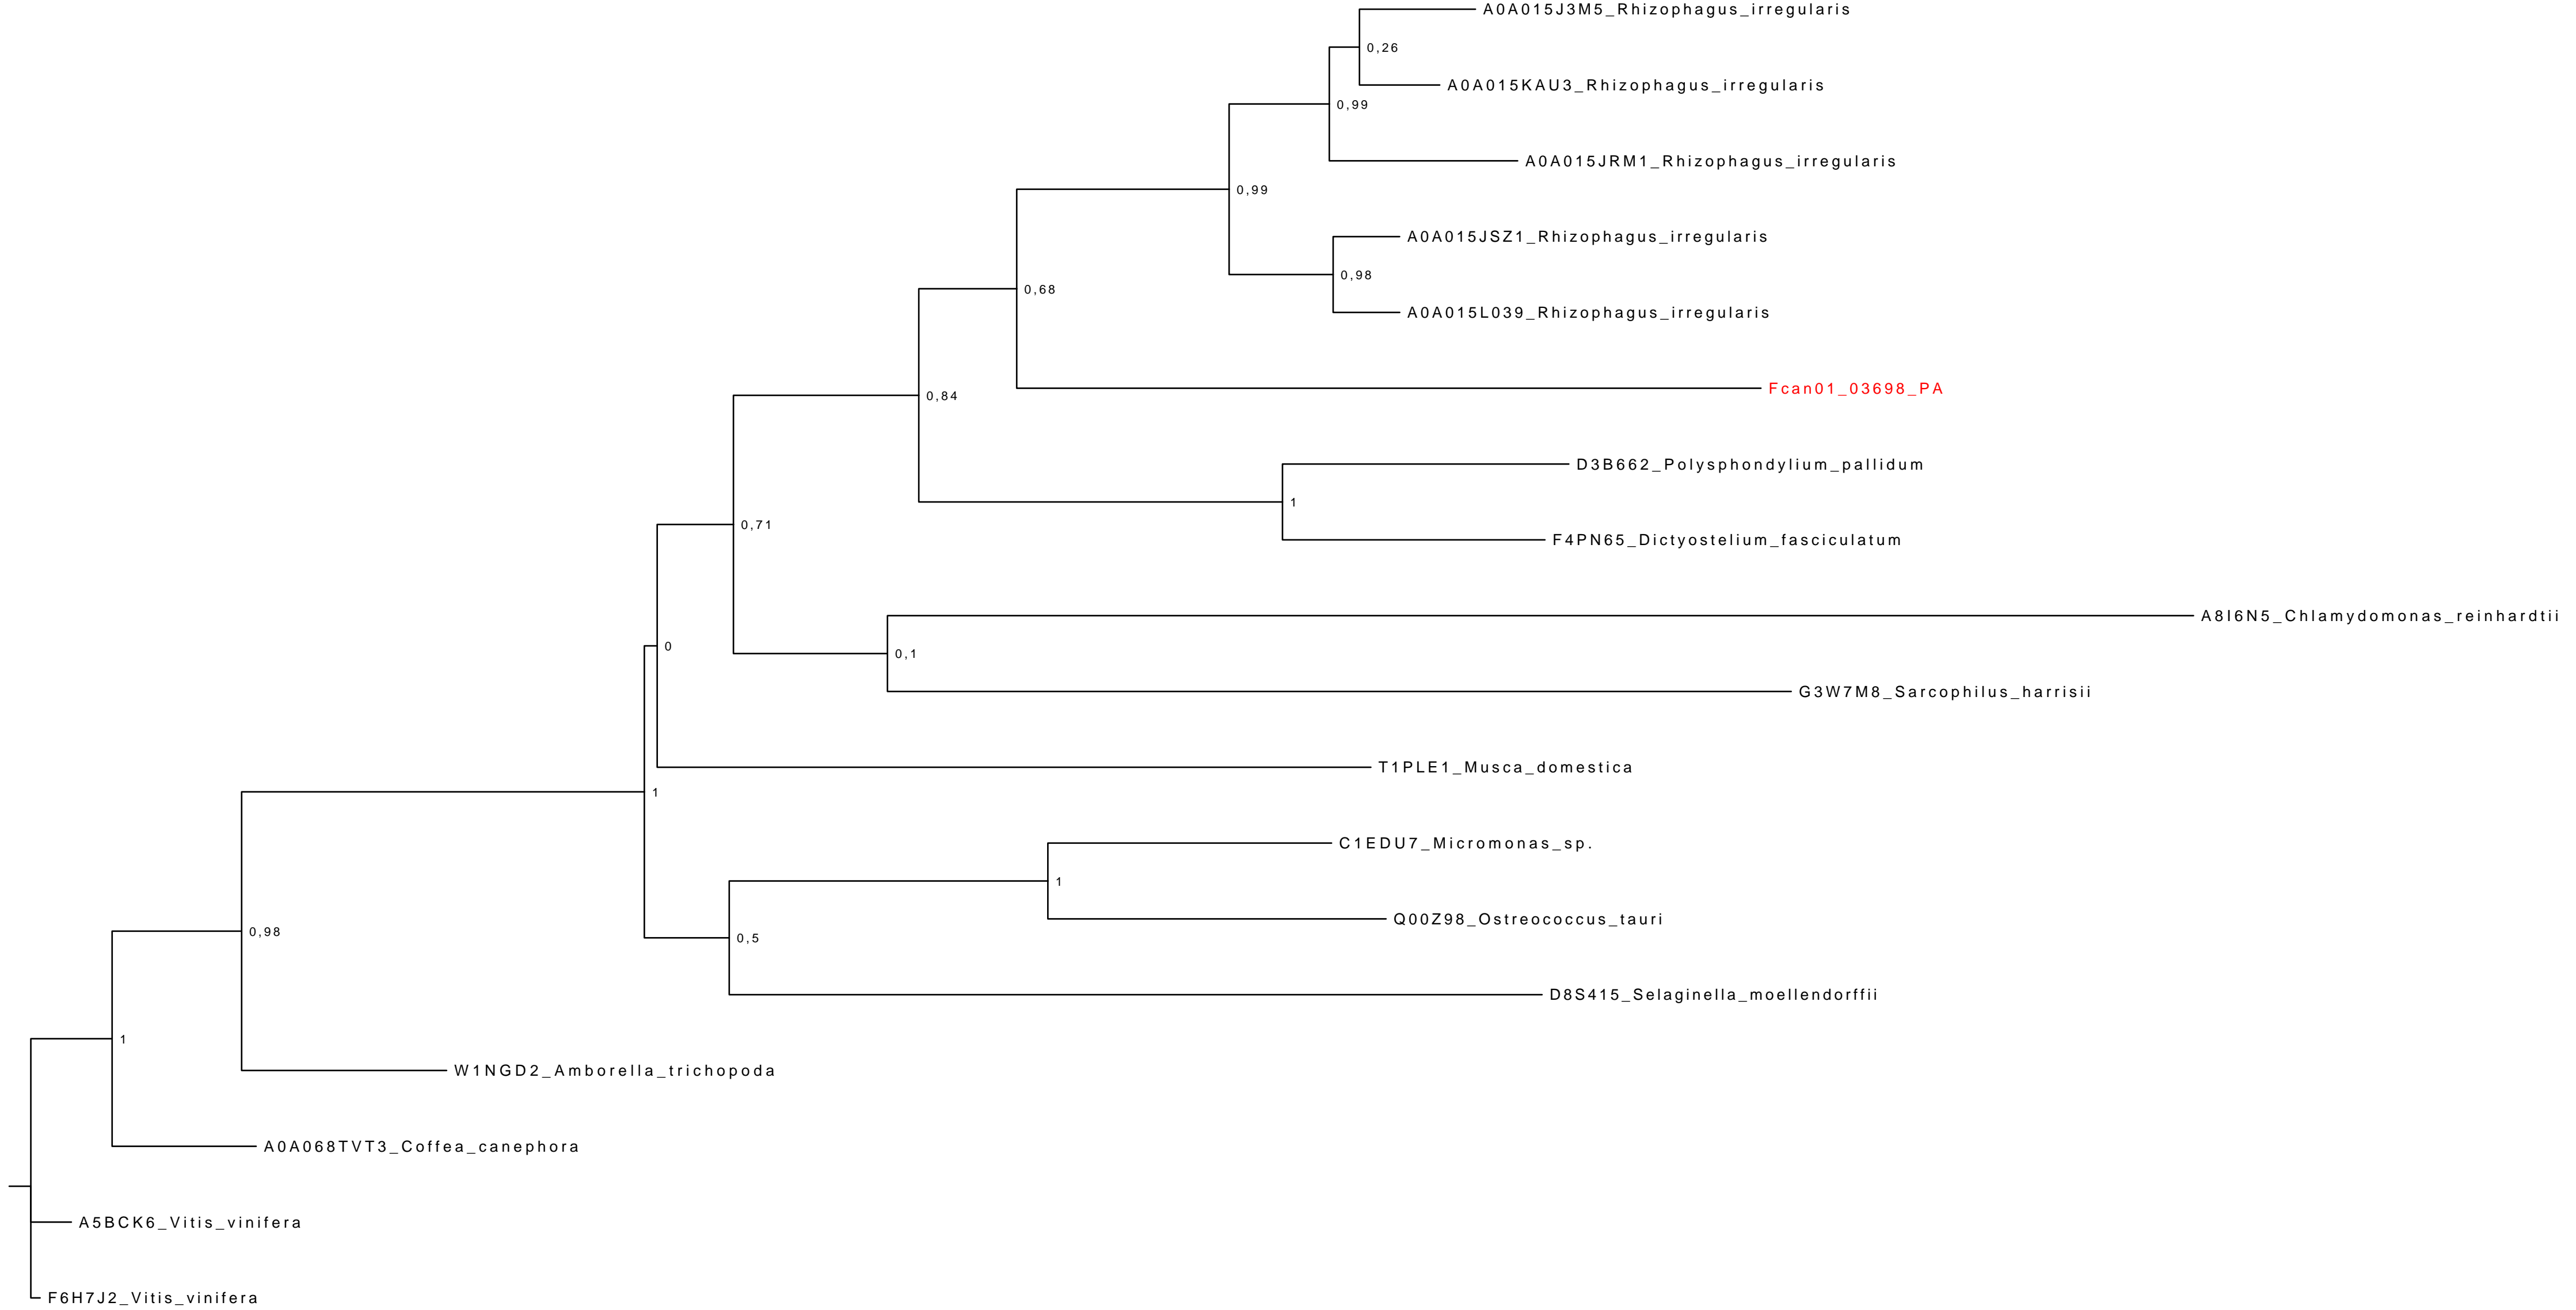

0.6

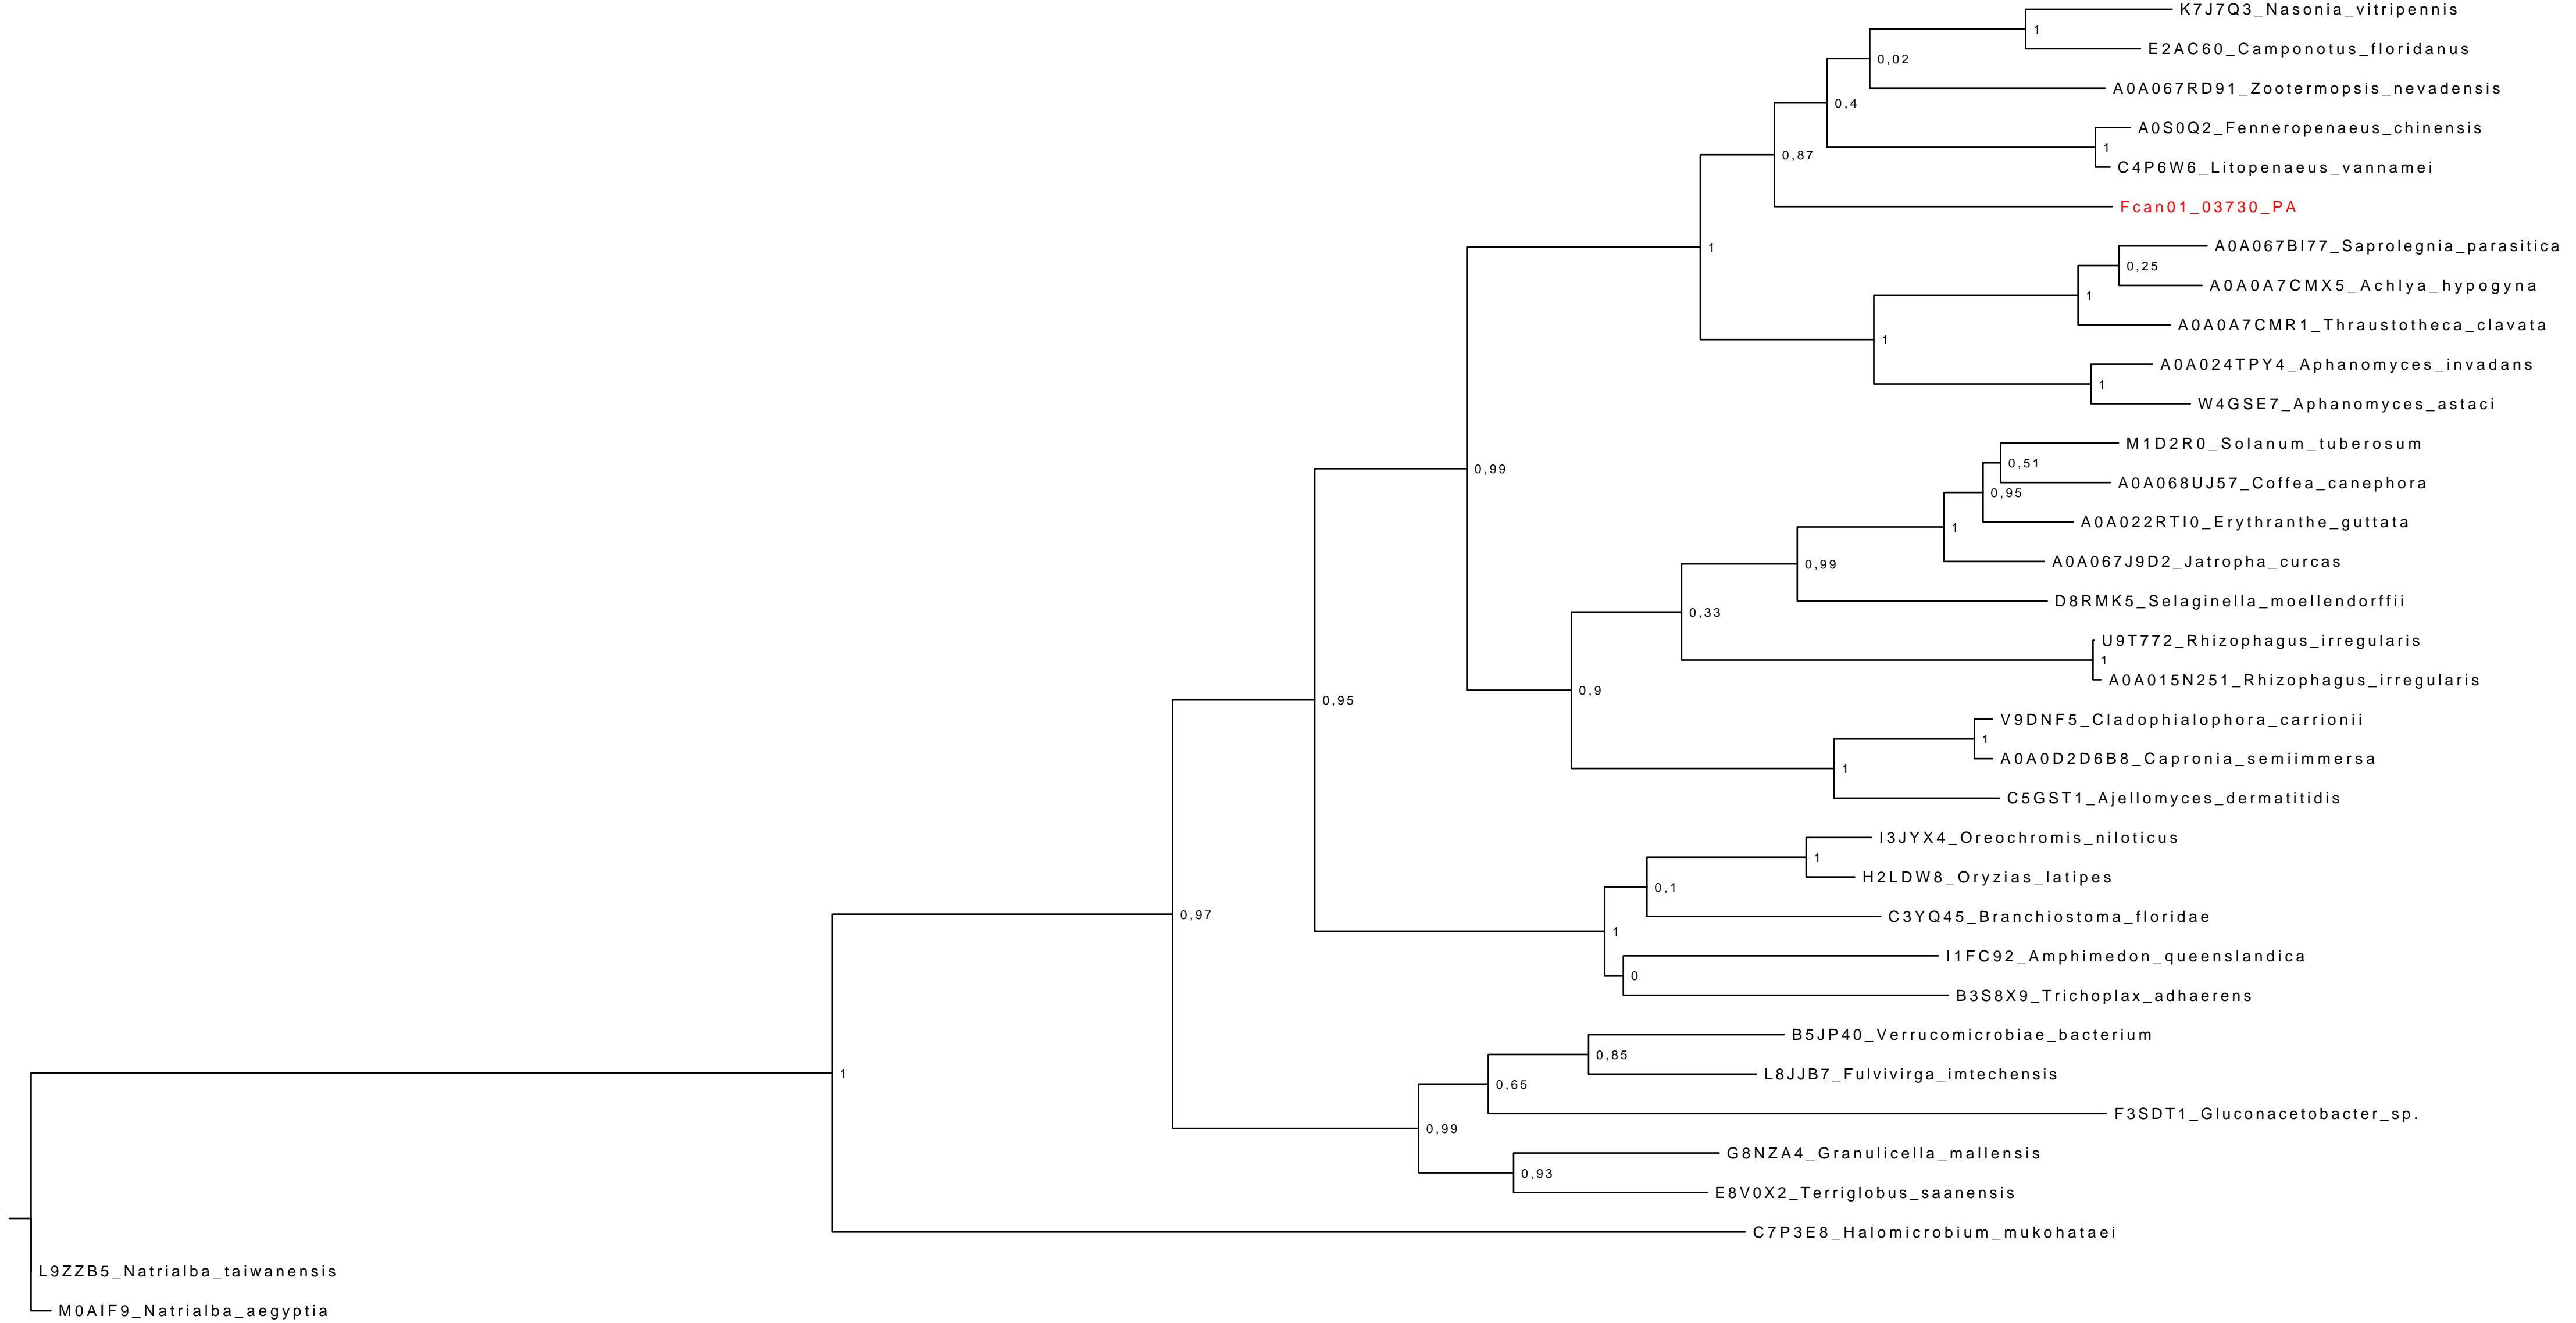

0.5

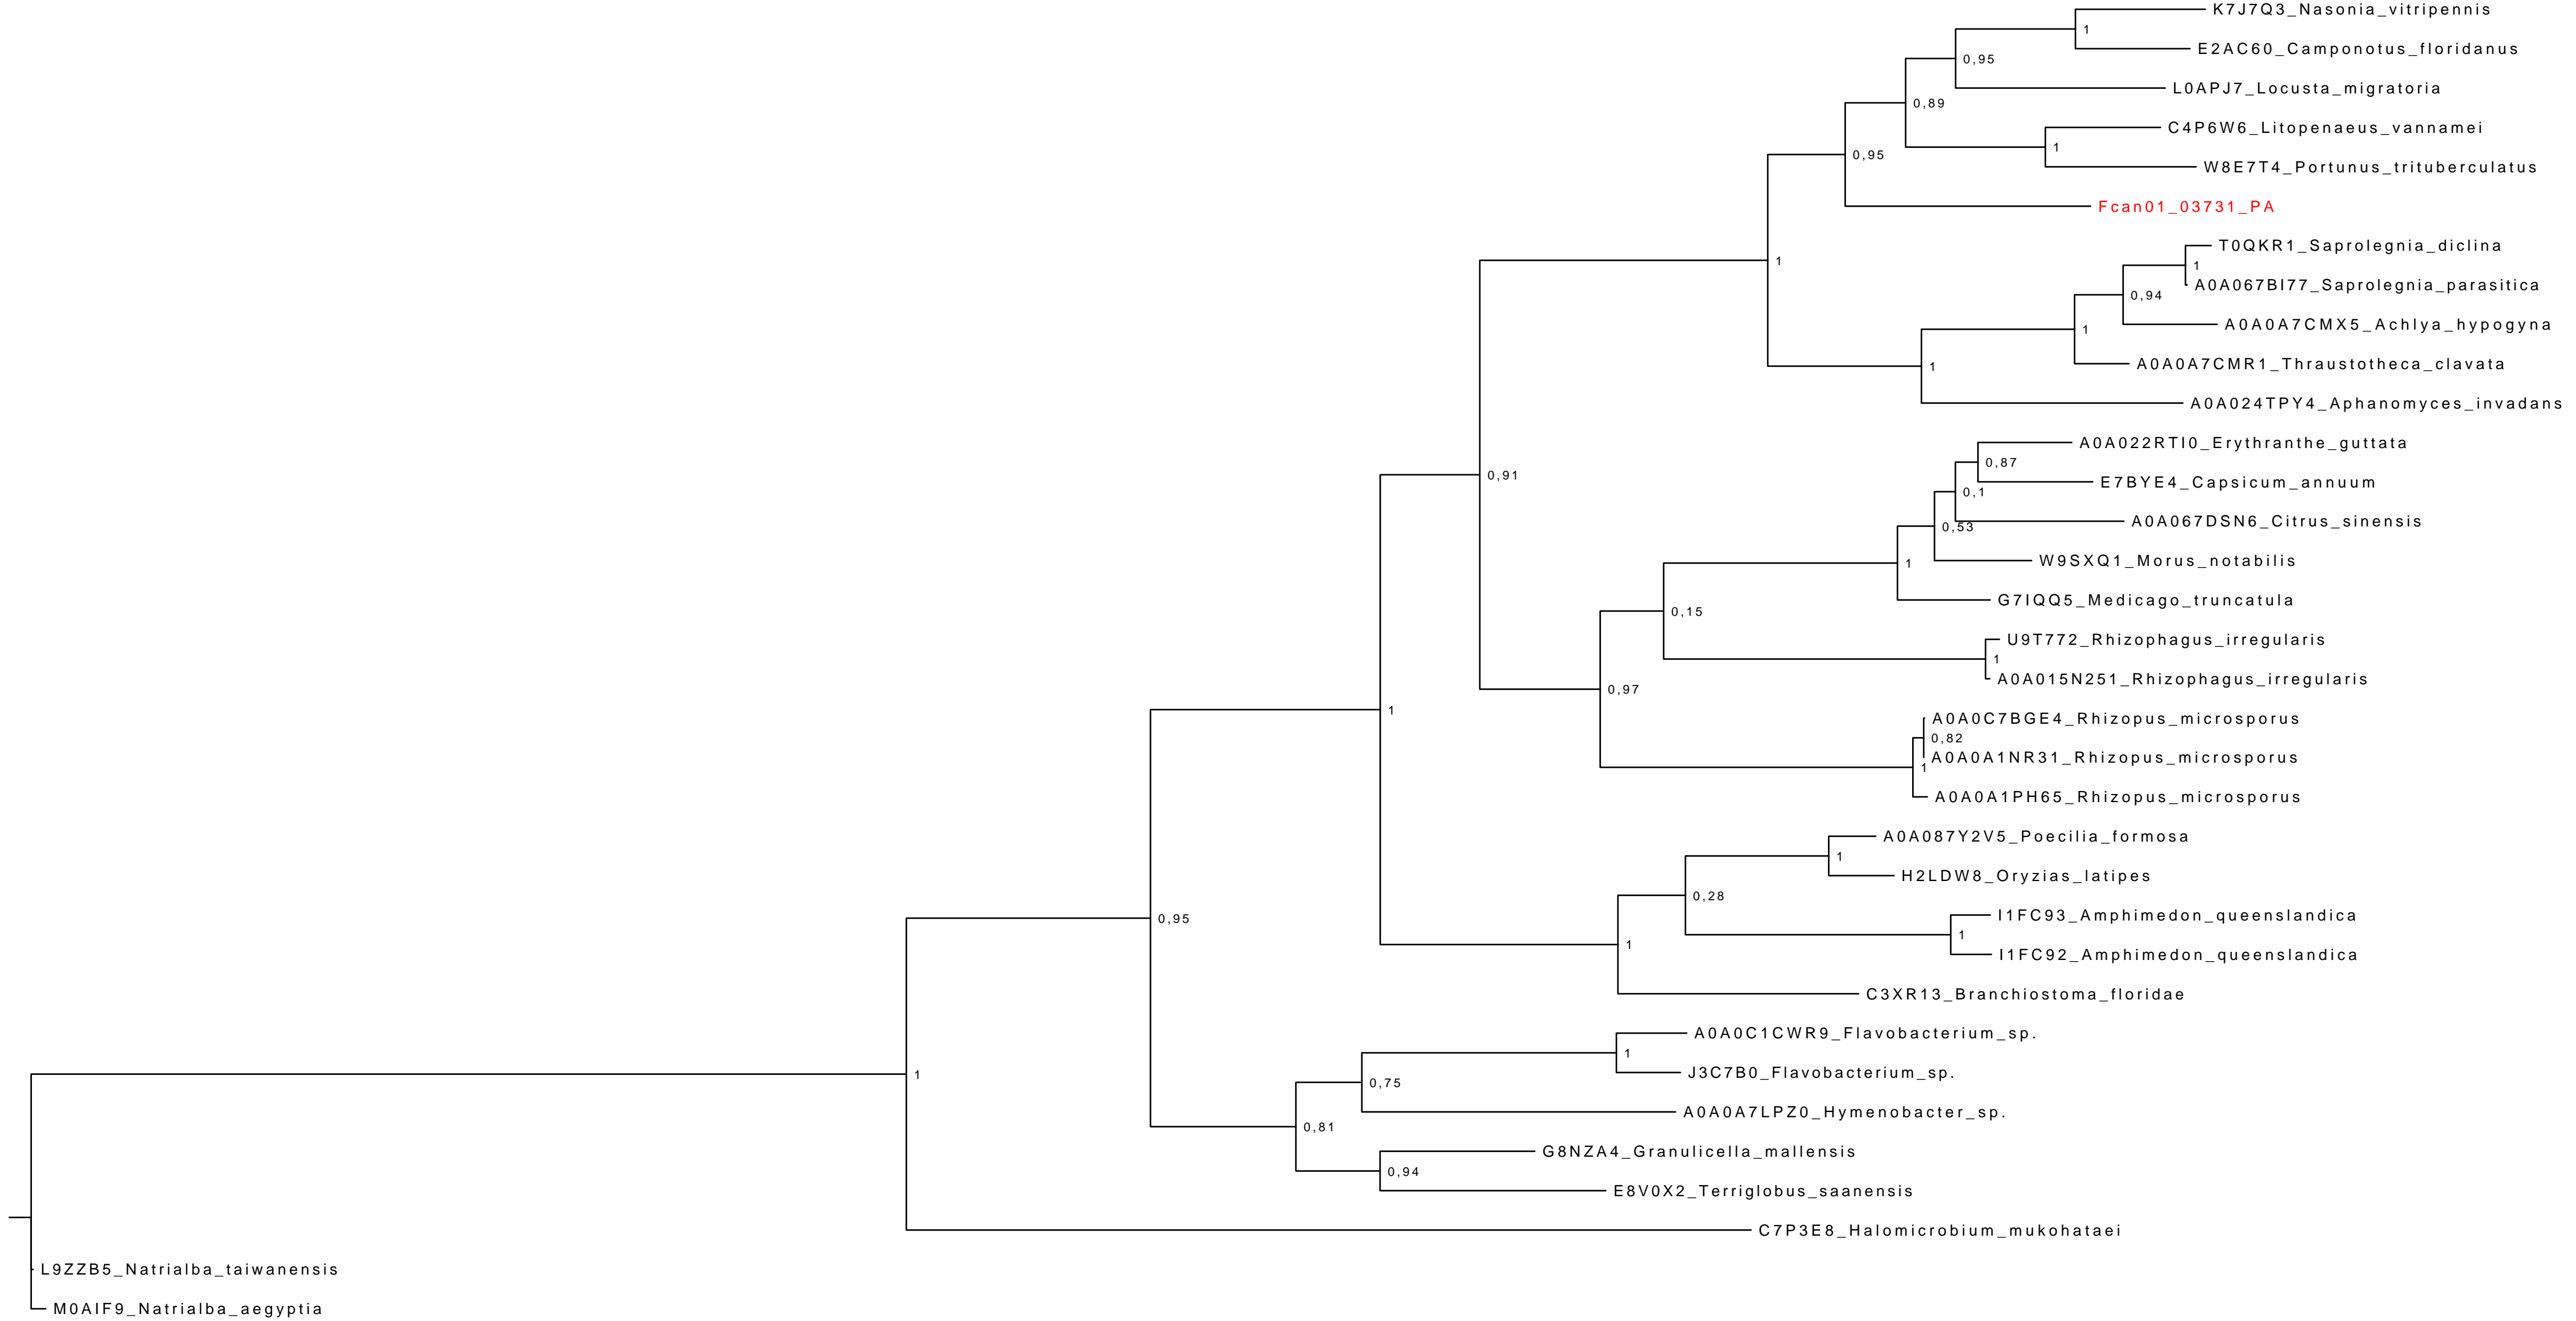

0.5



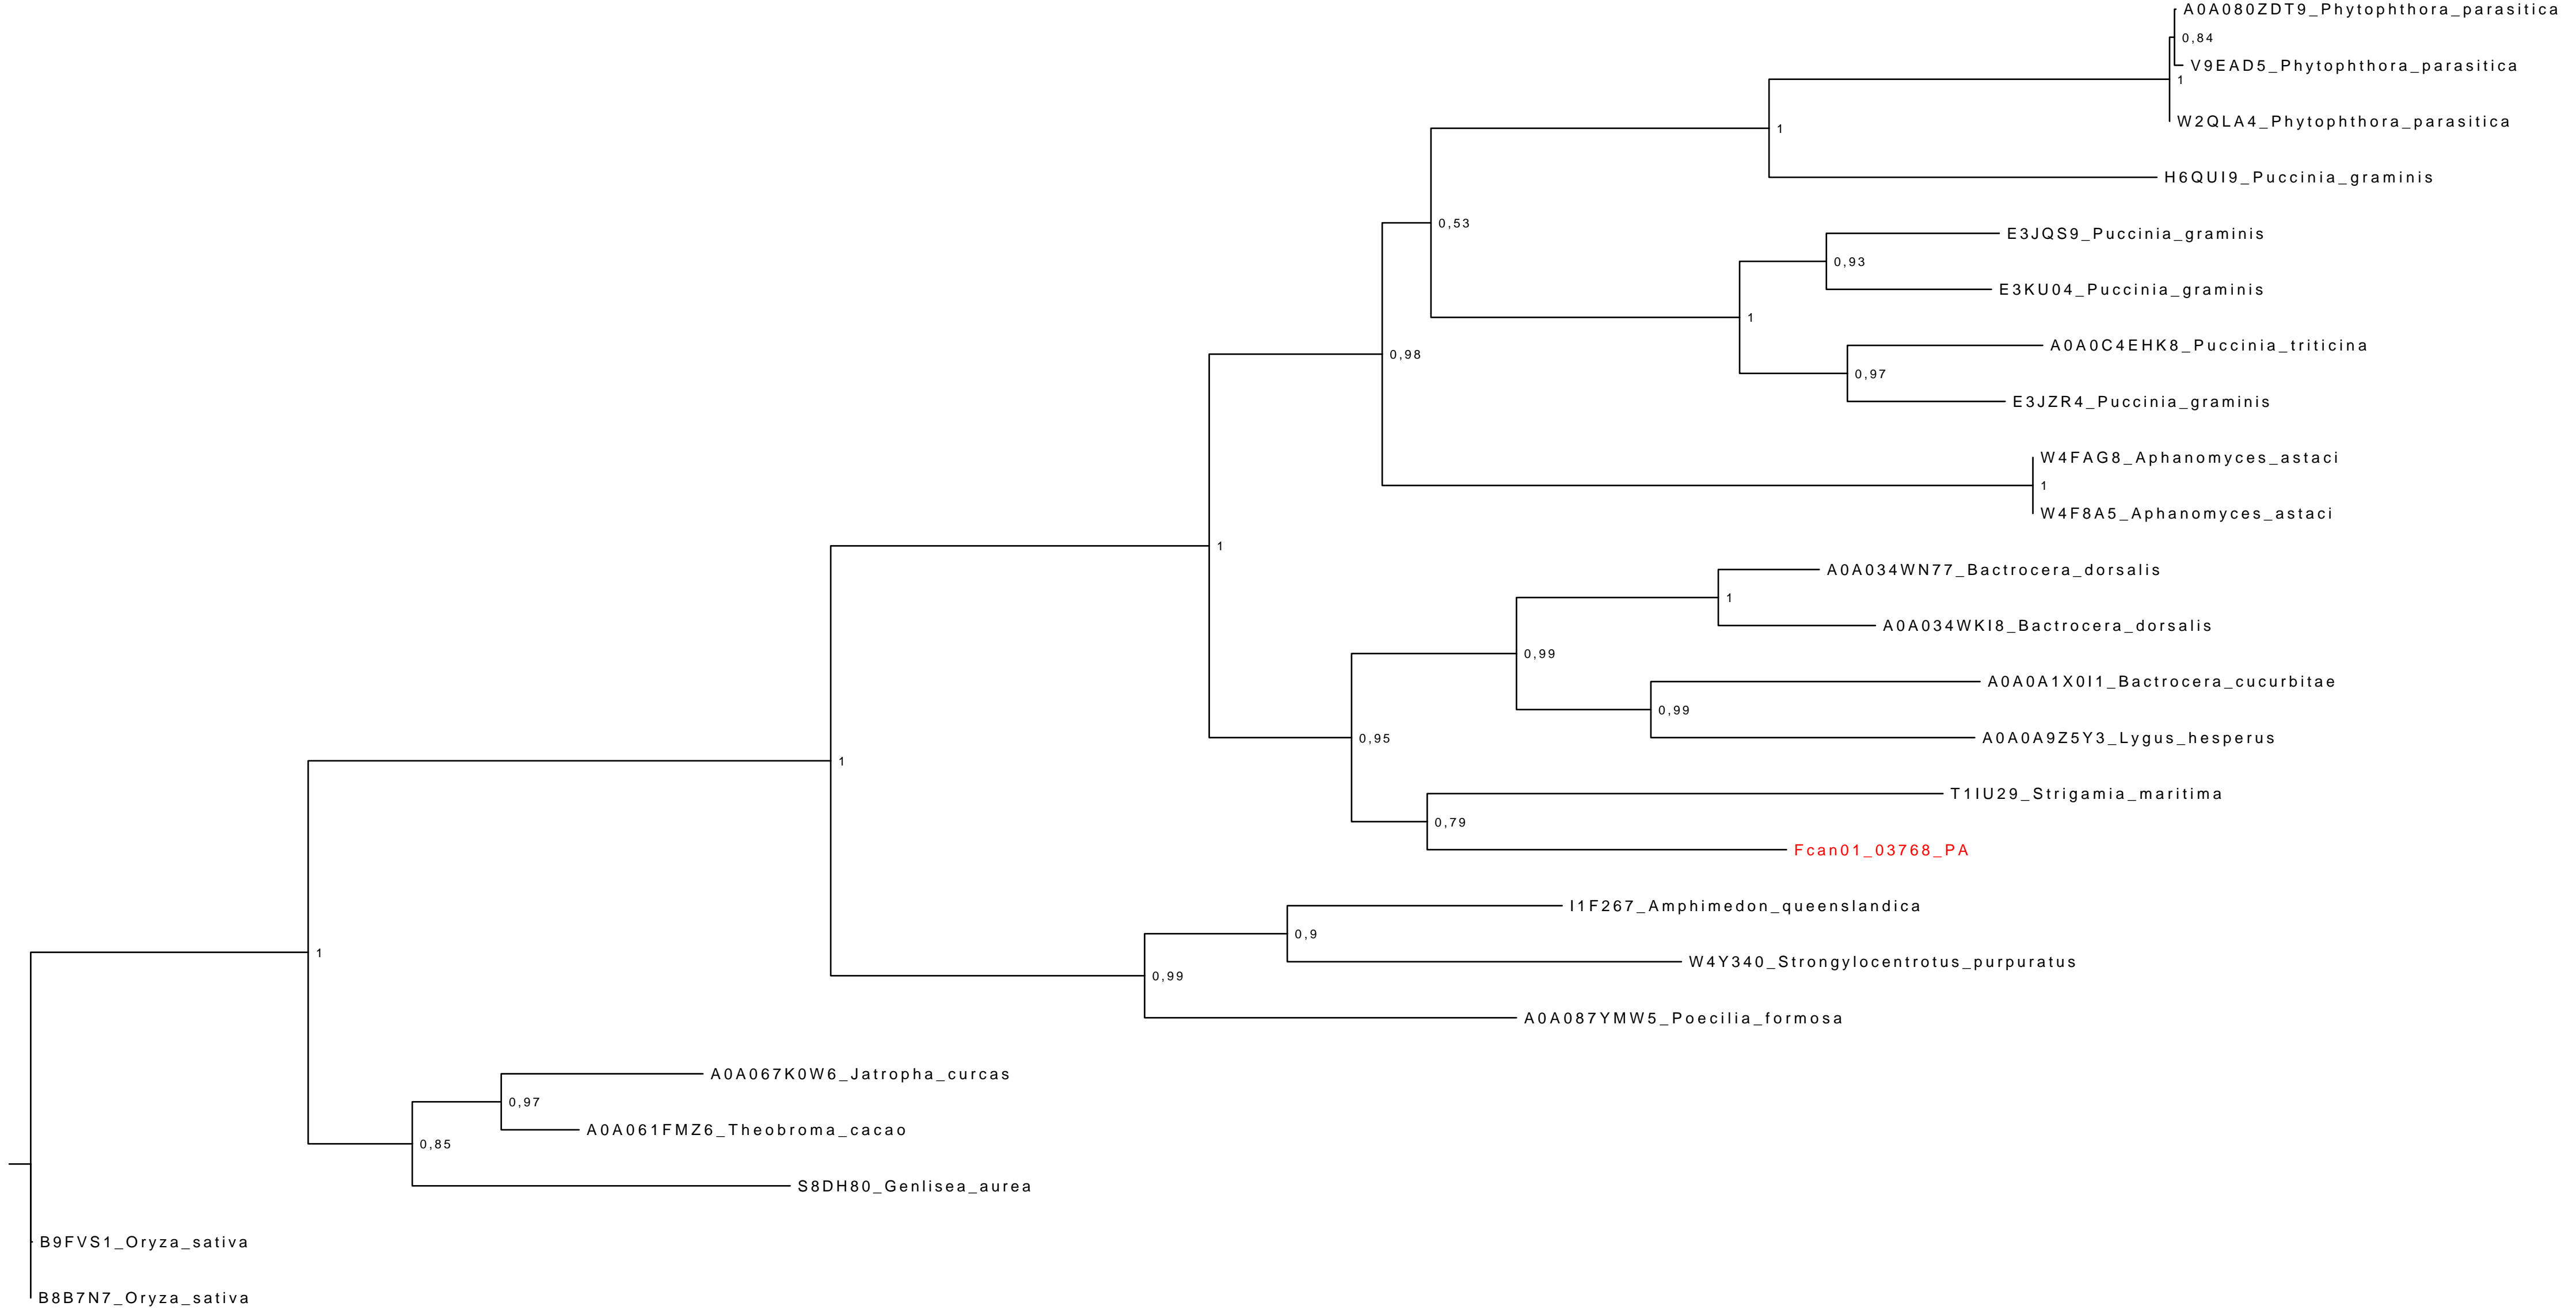

0.4

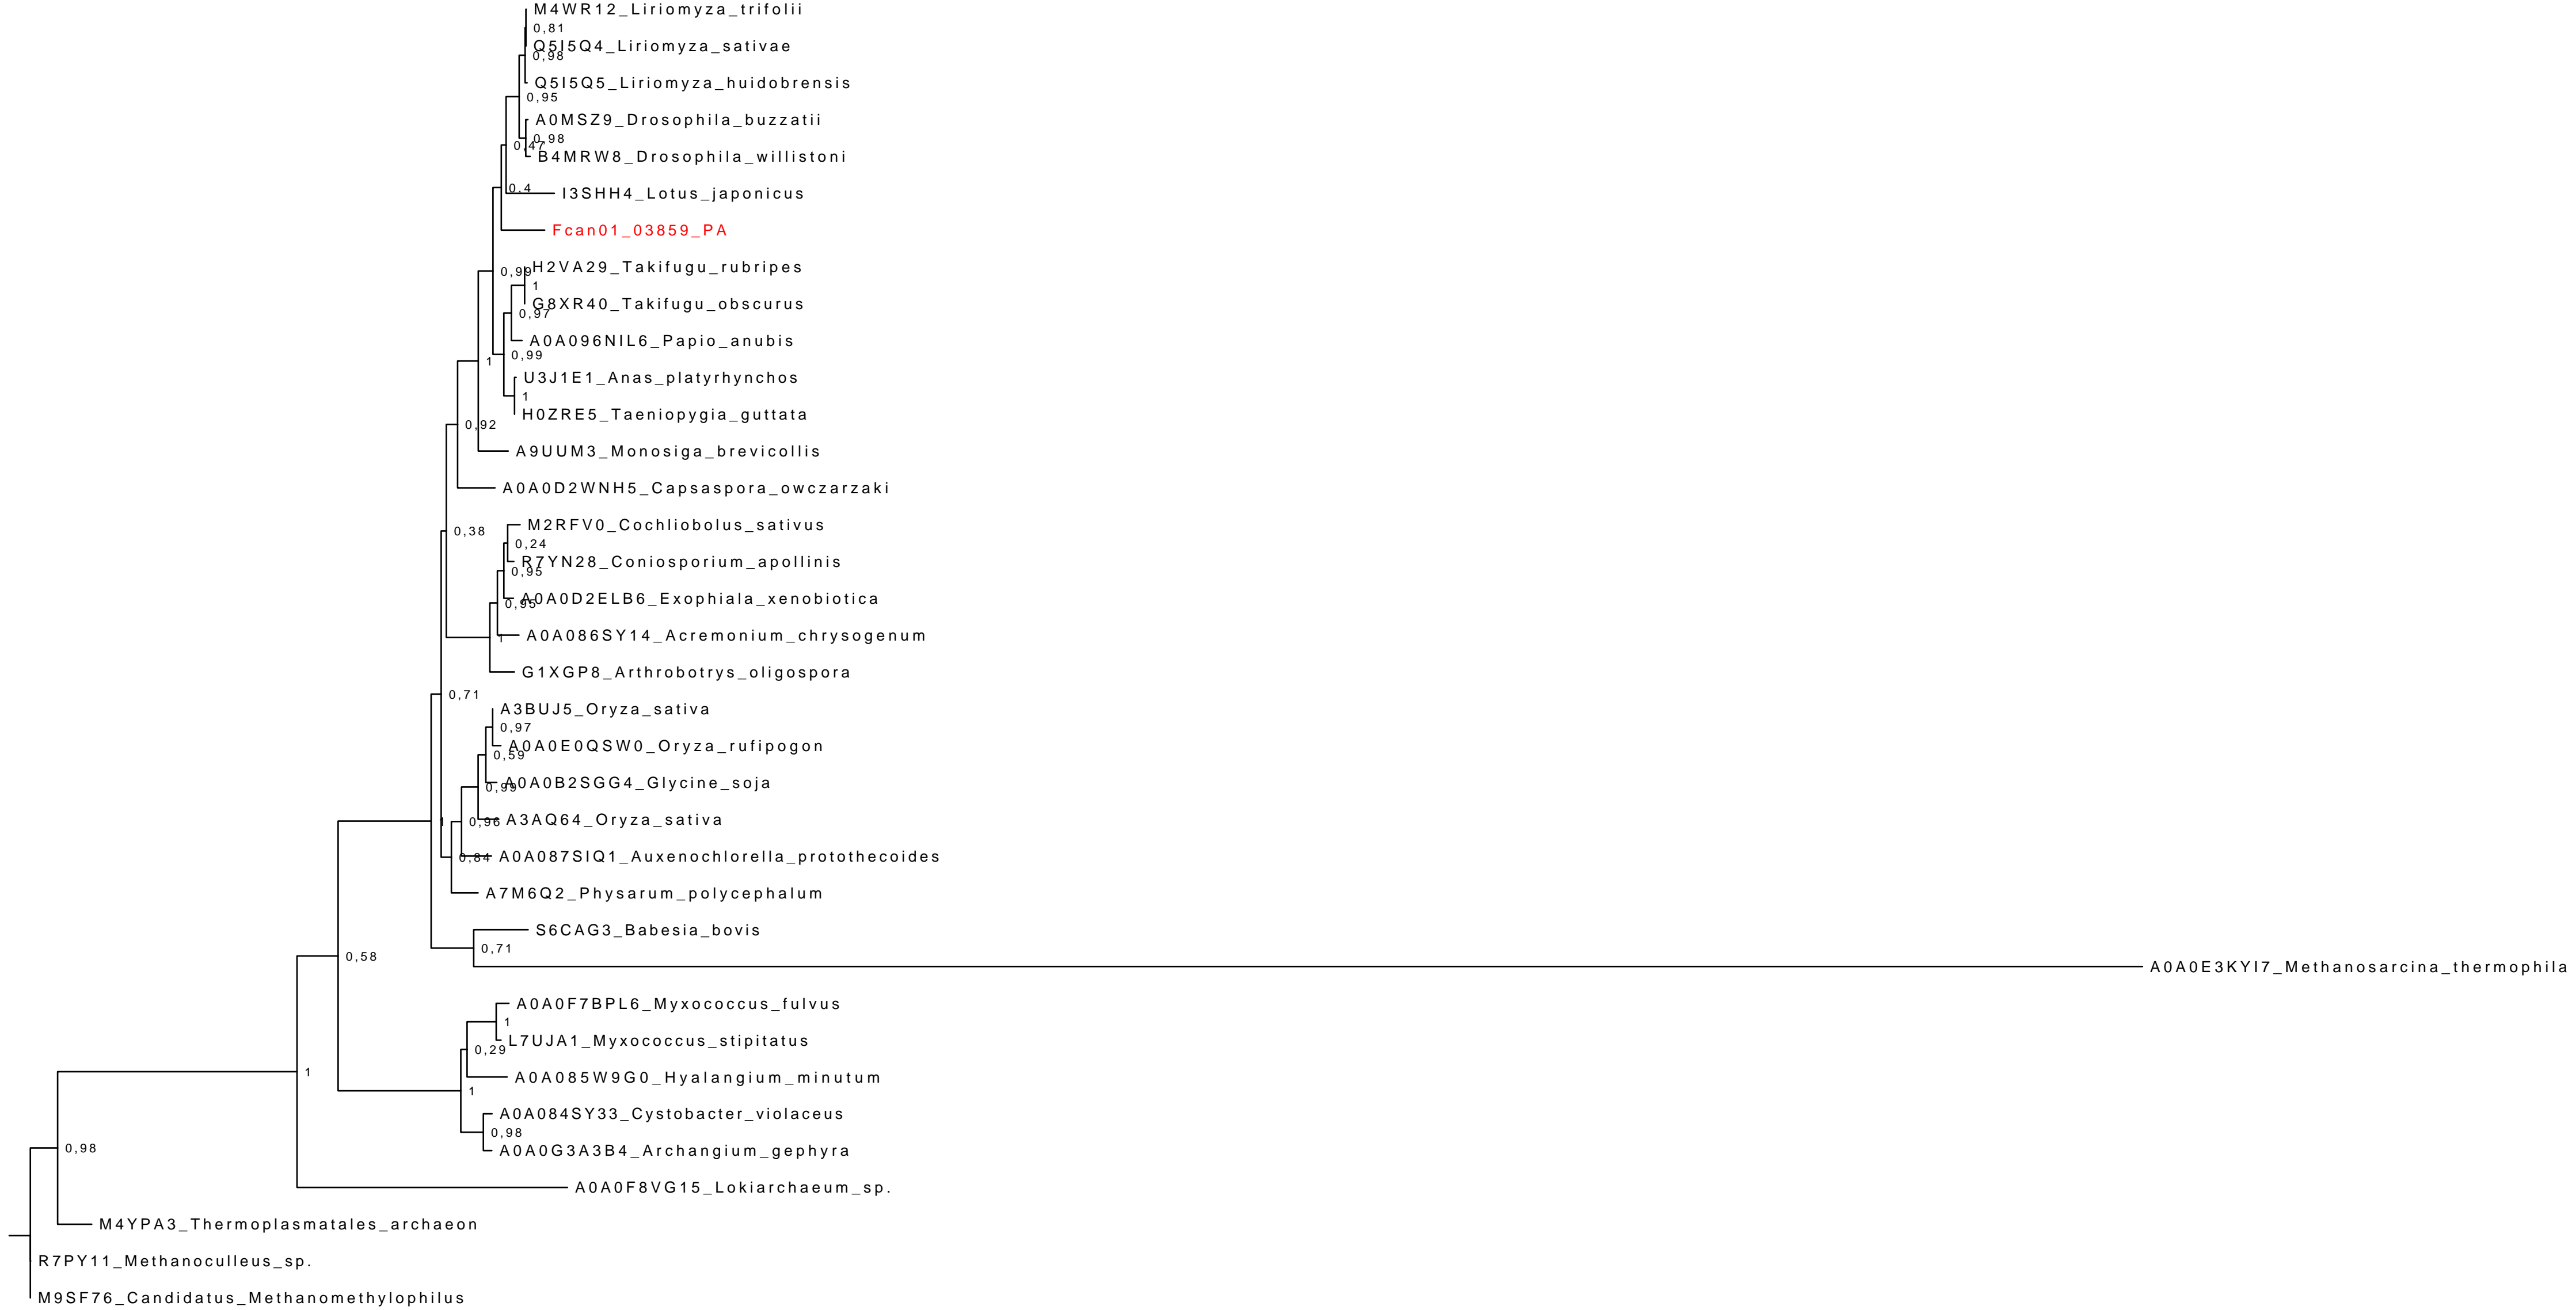

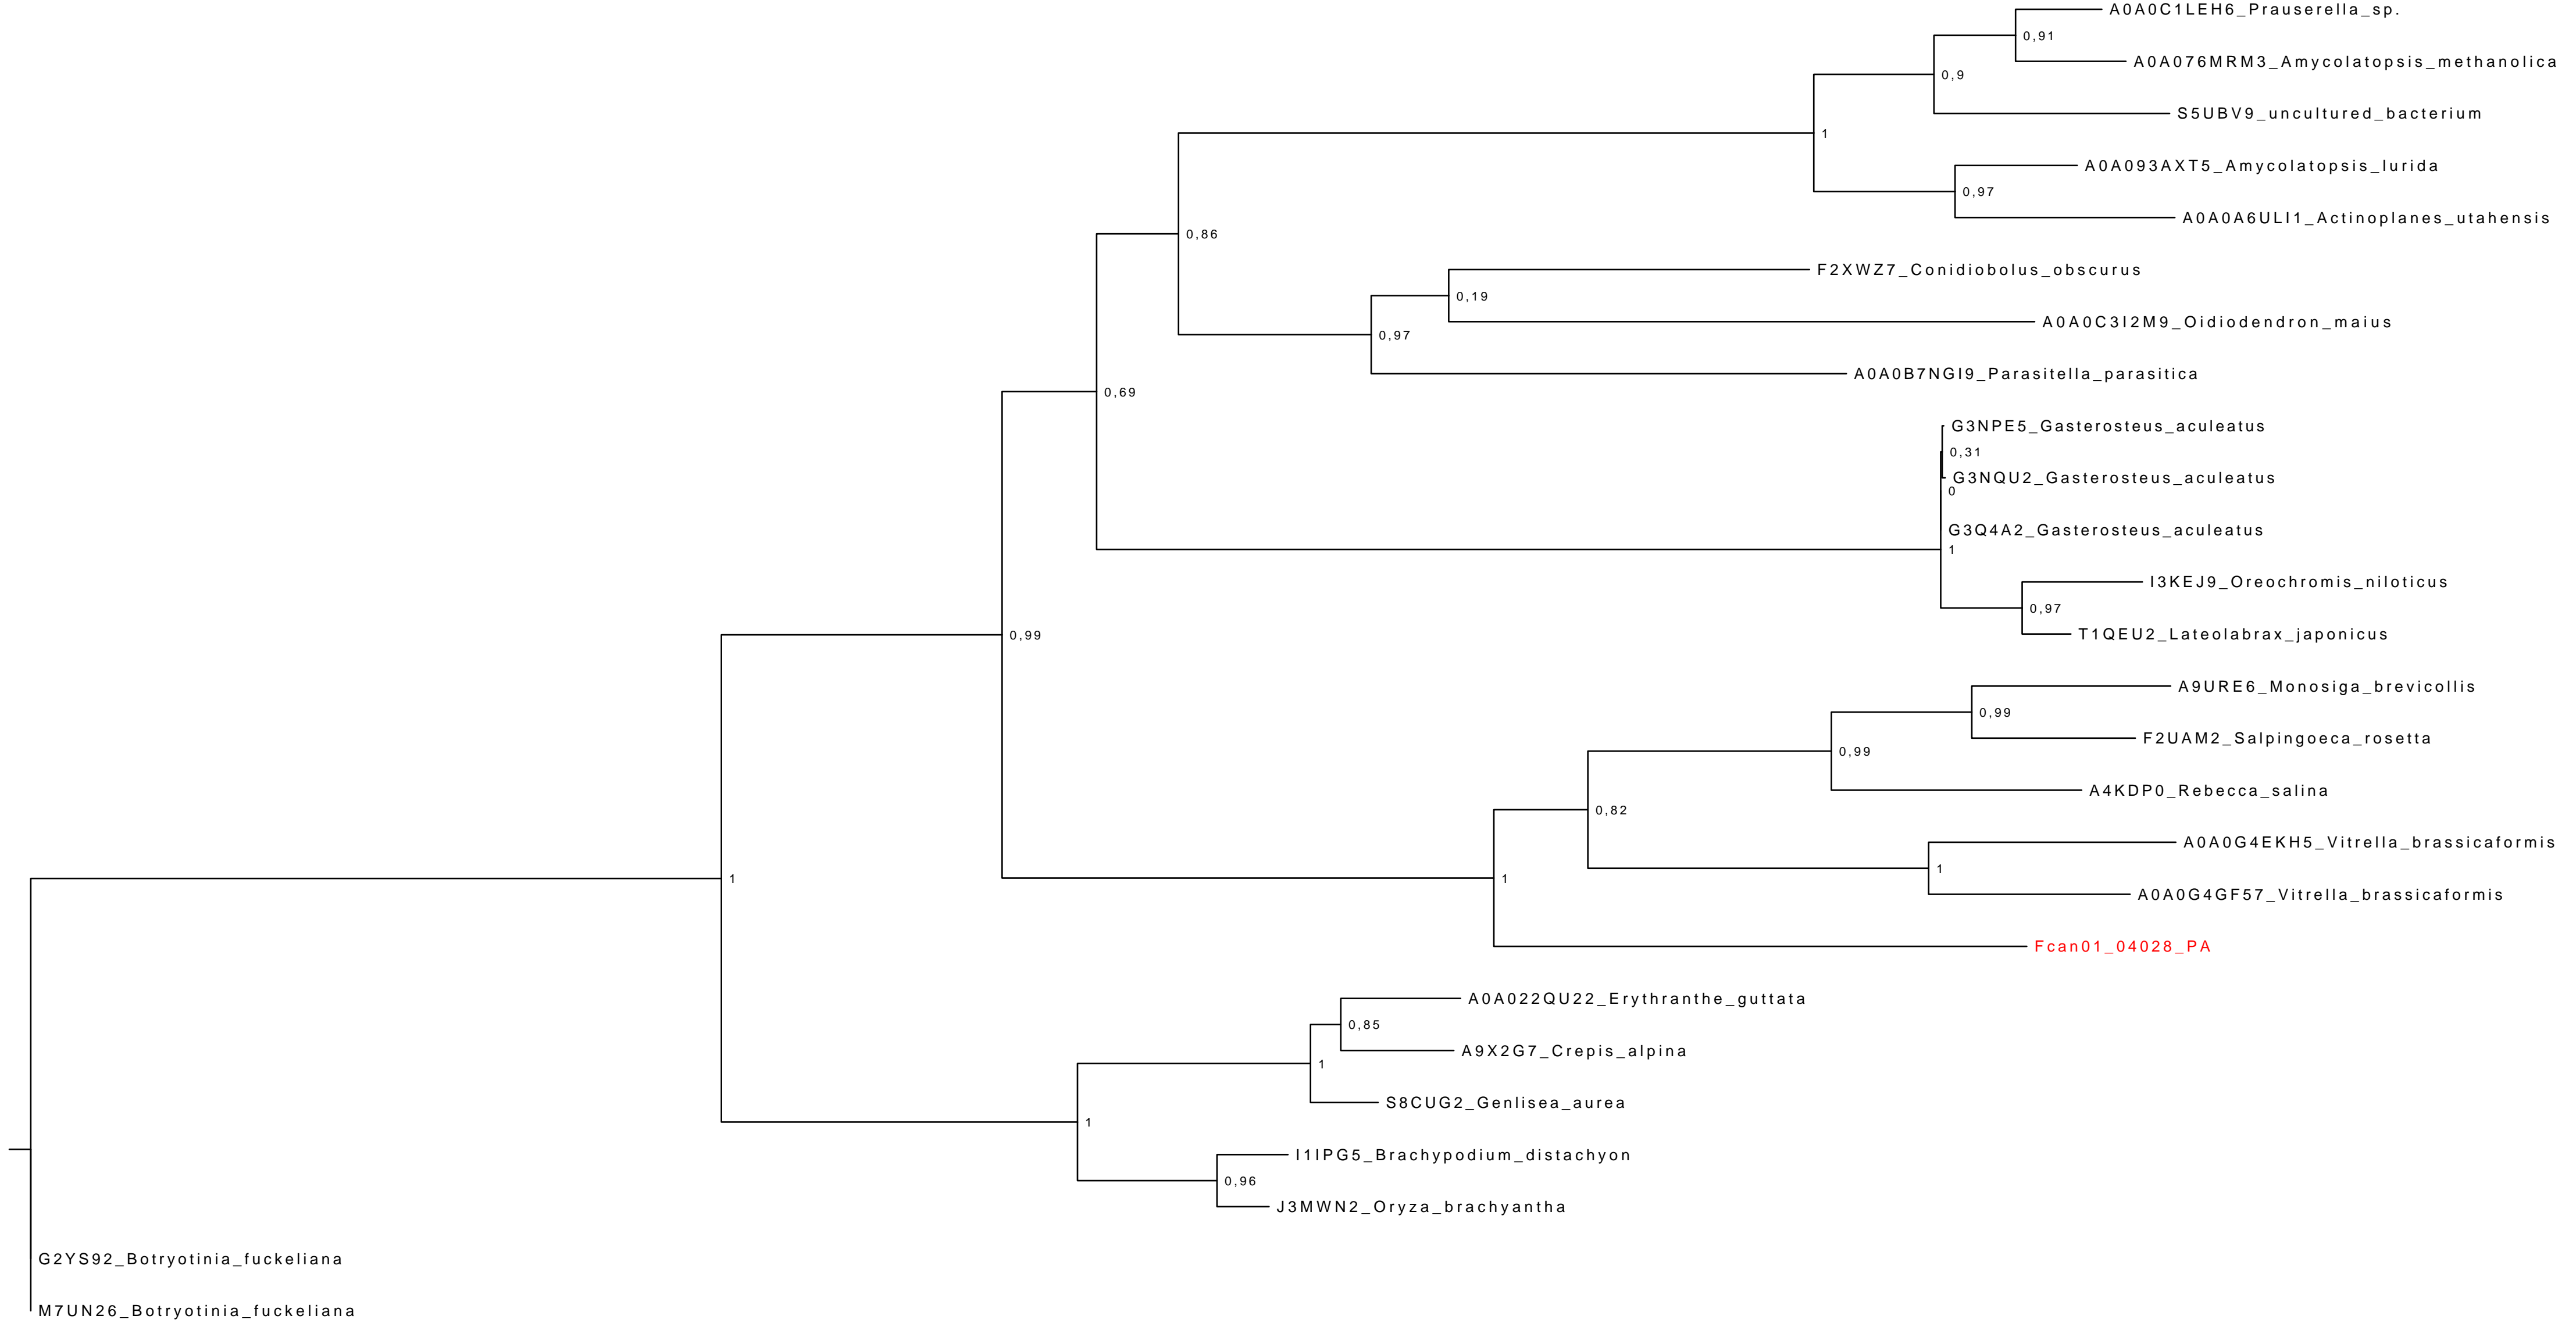

0.4

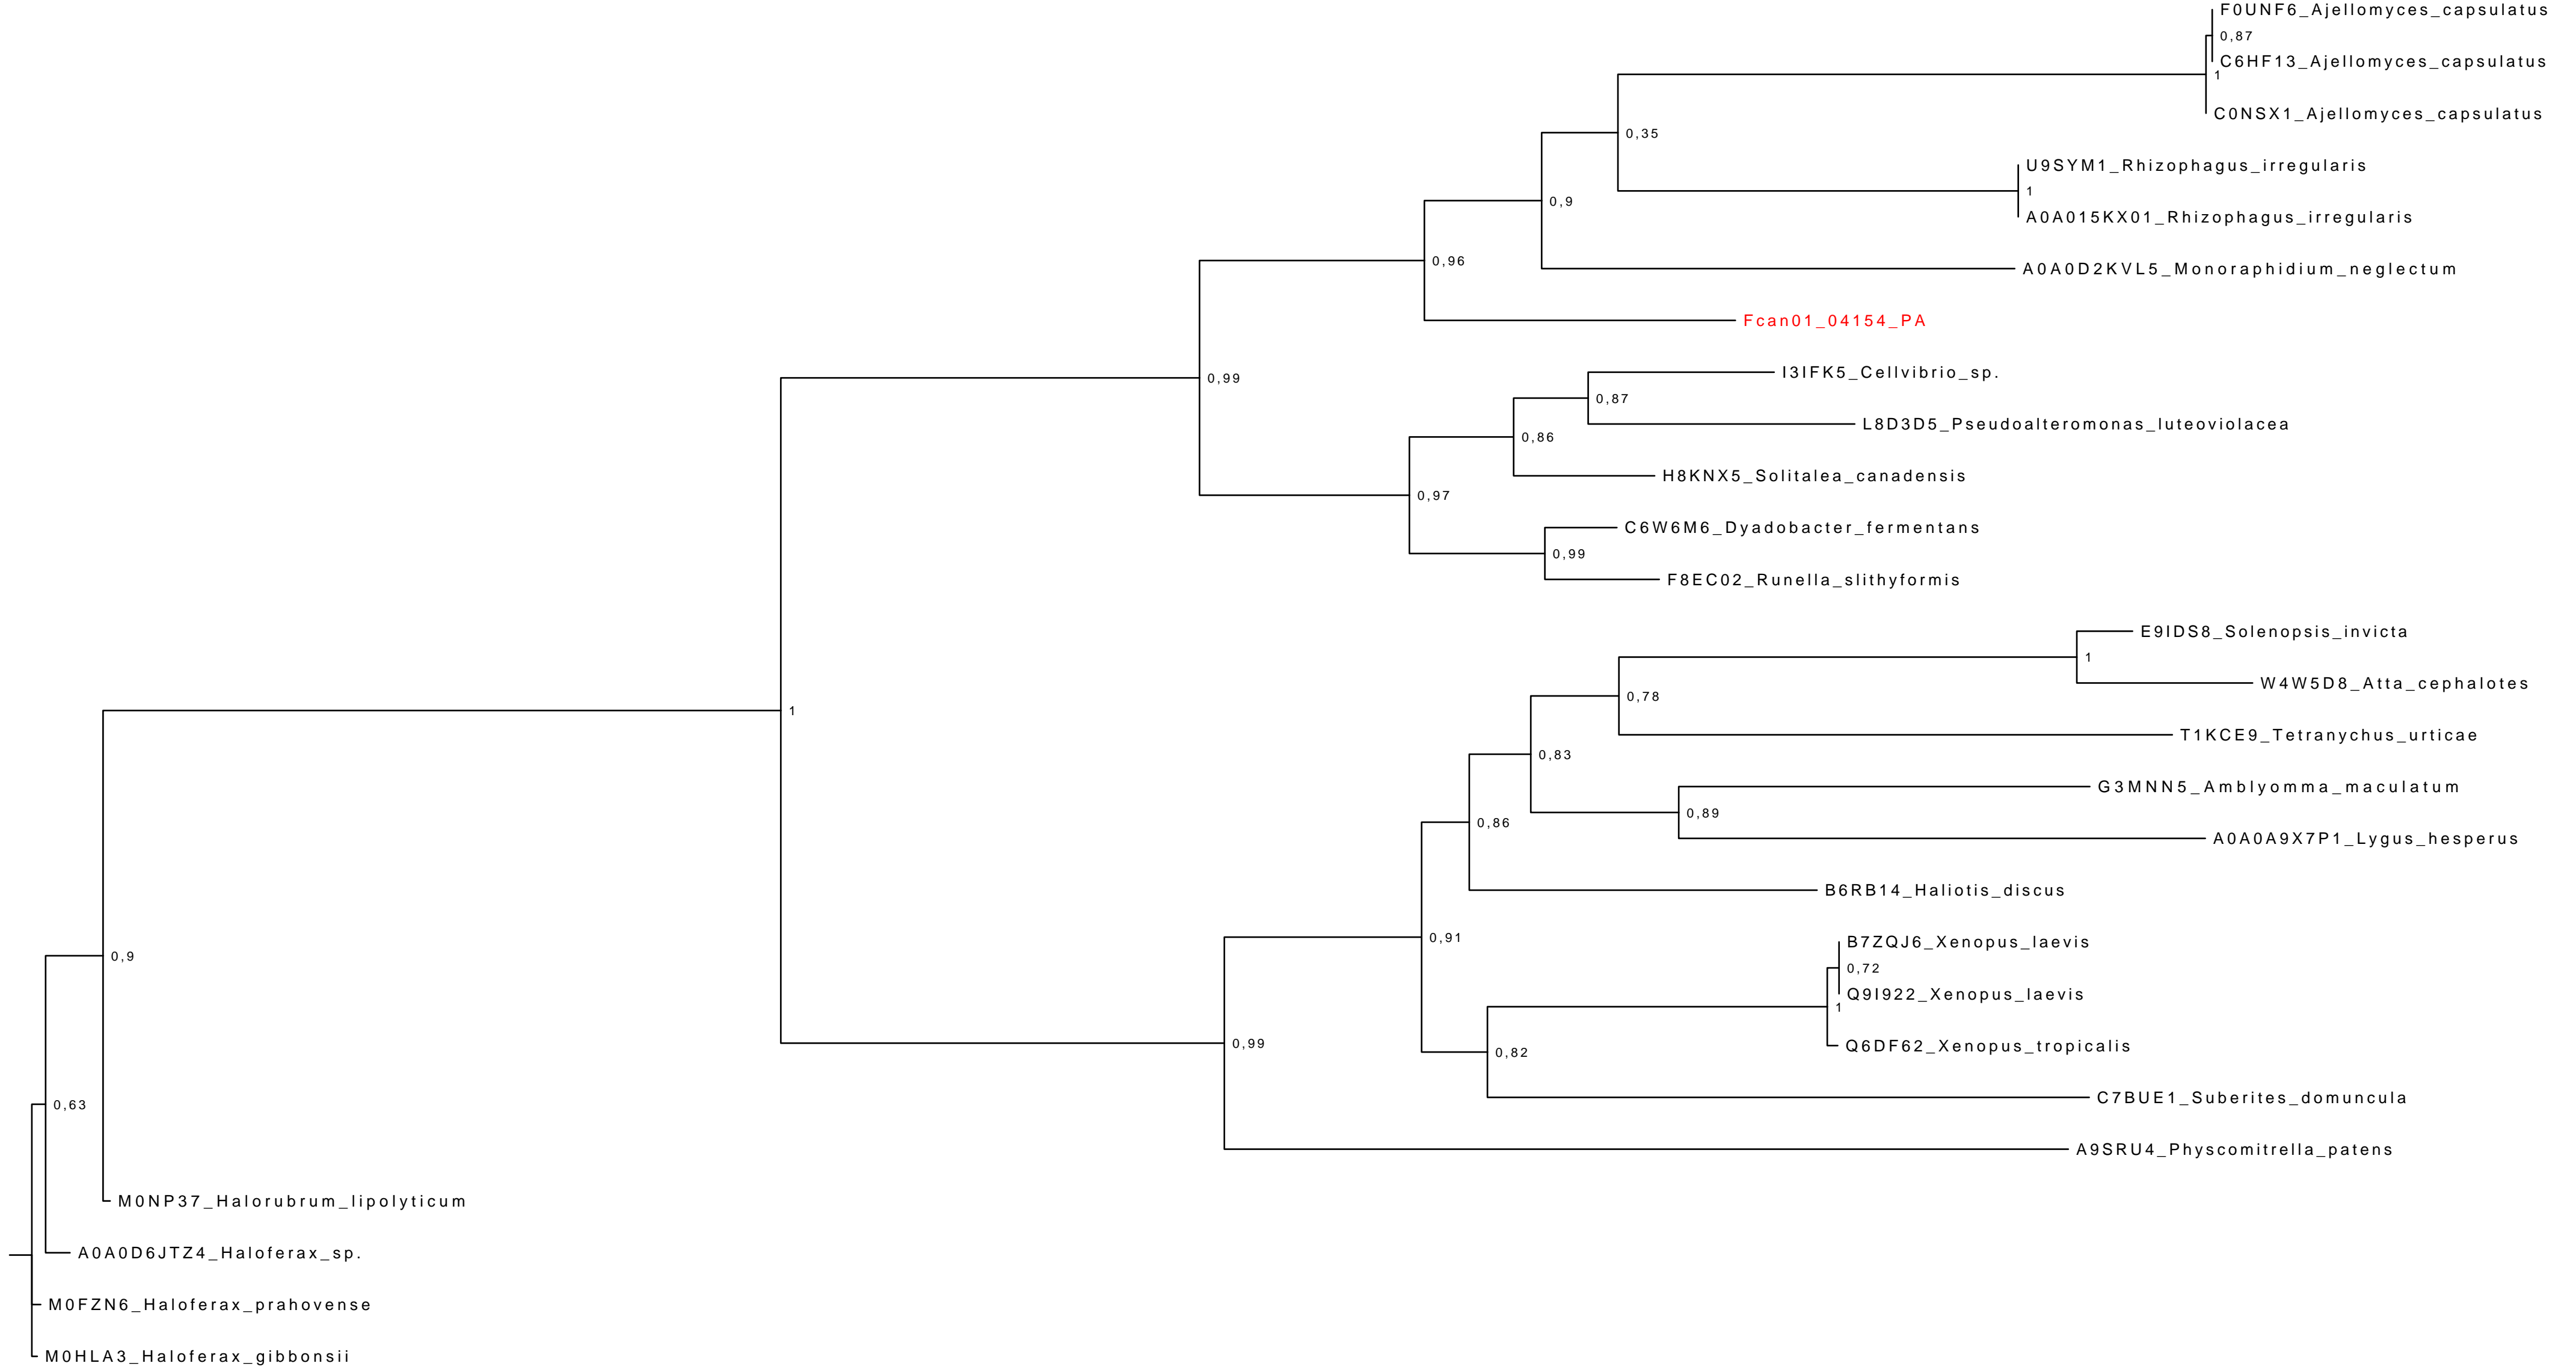

0.4

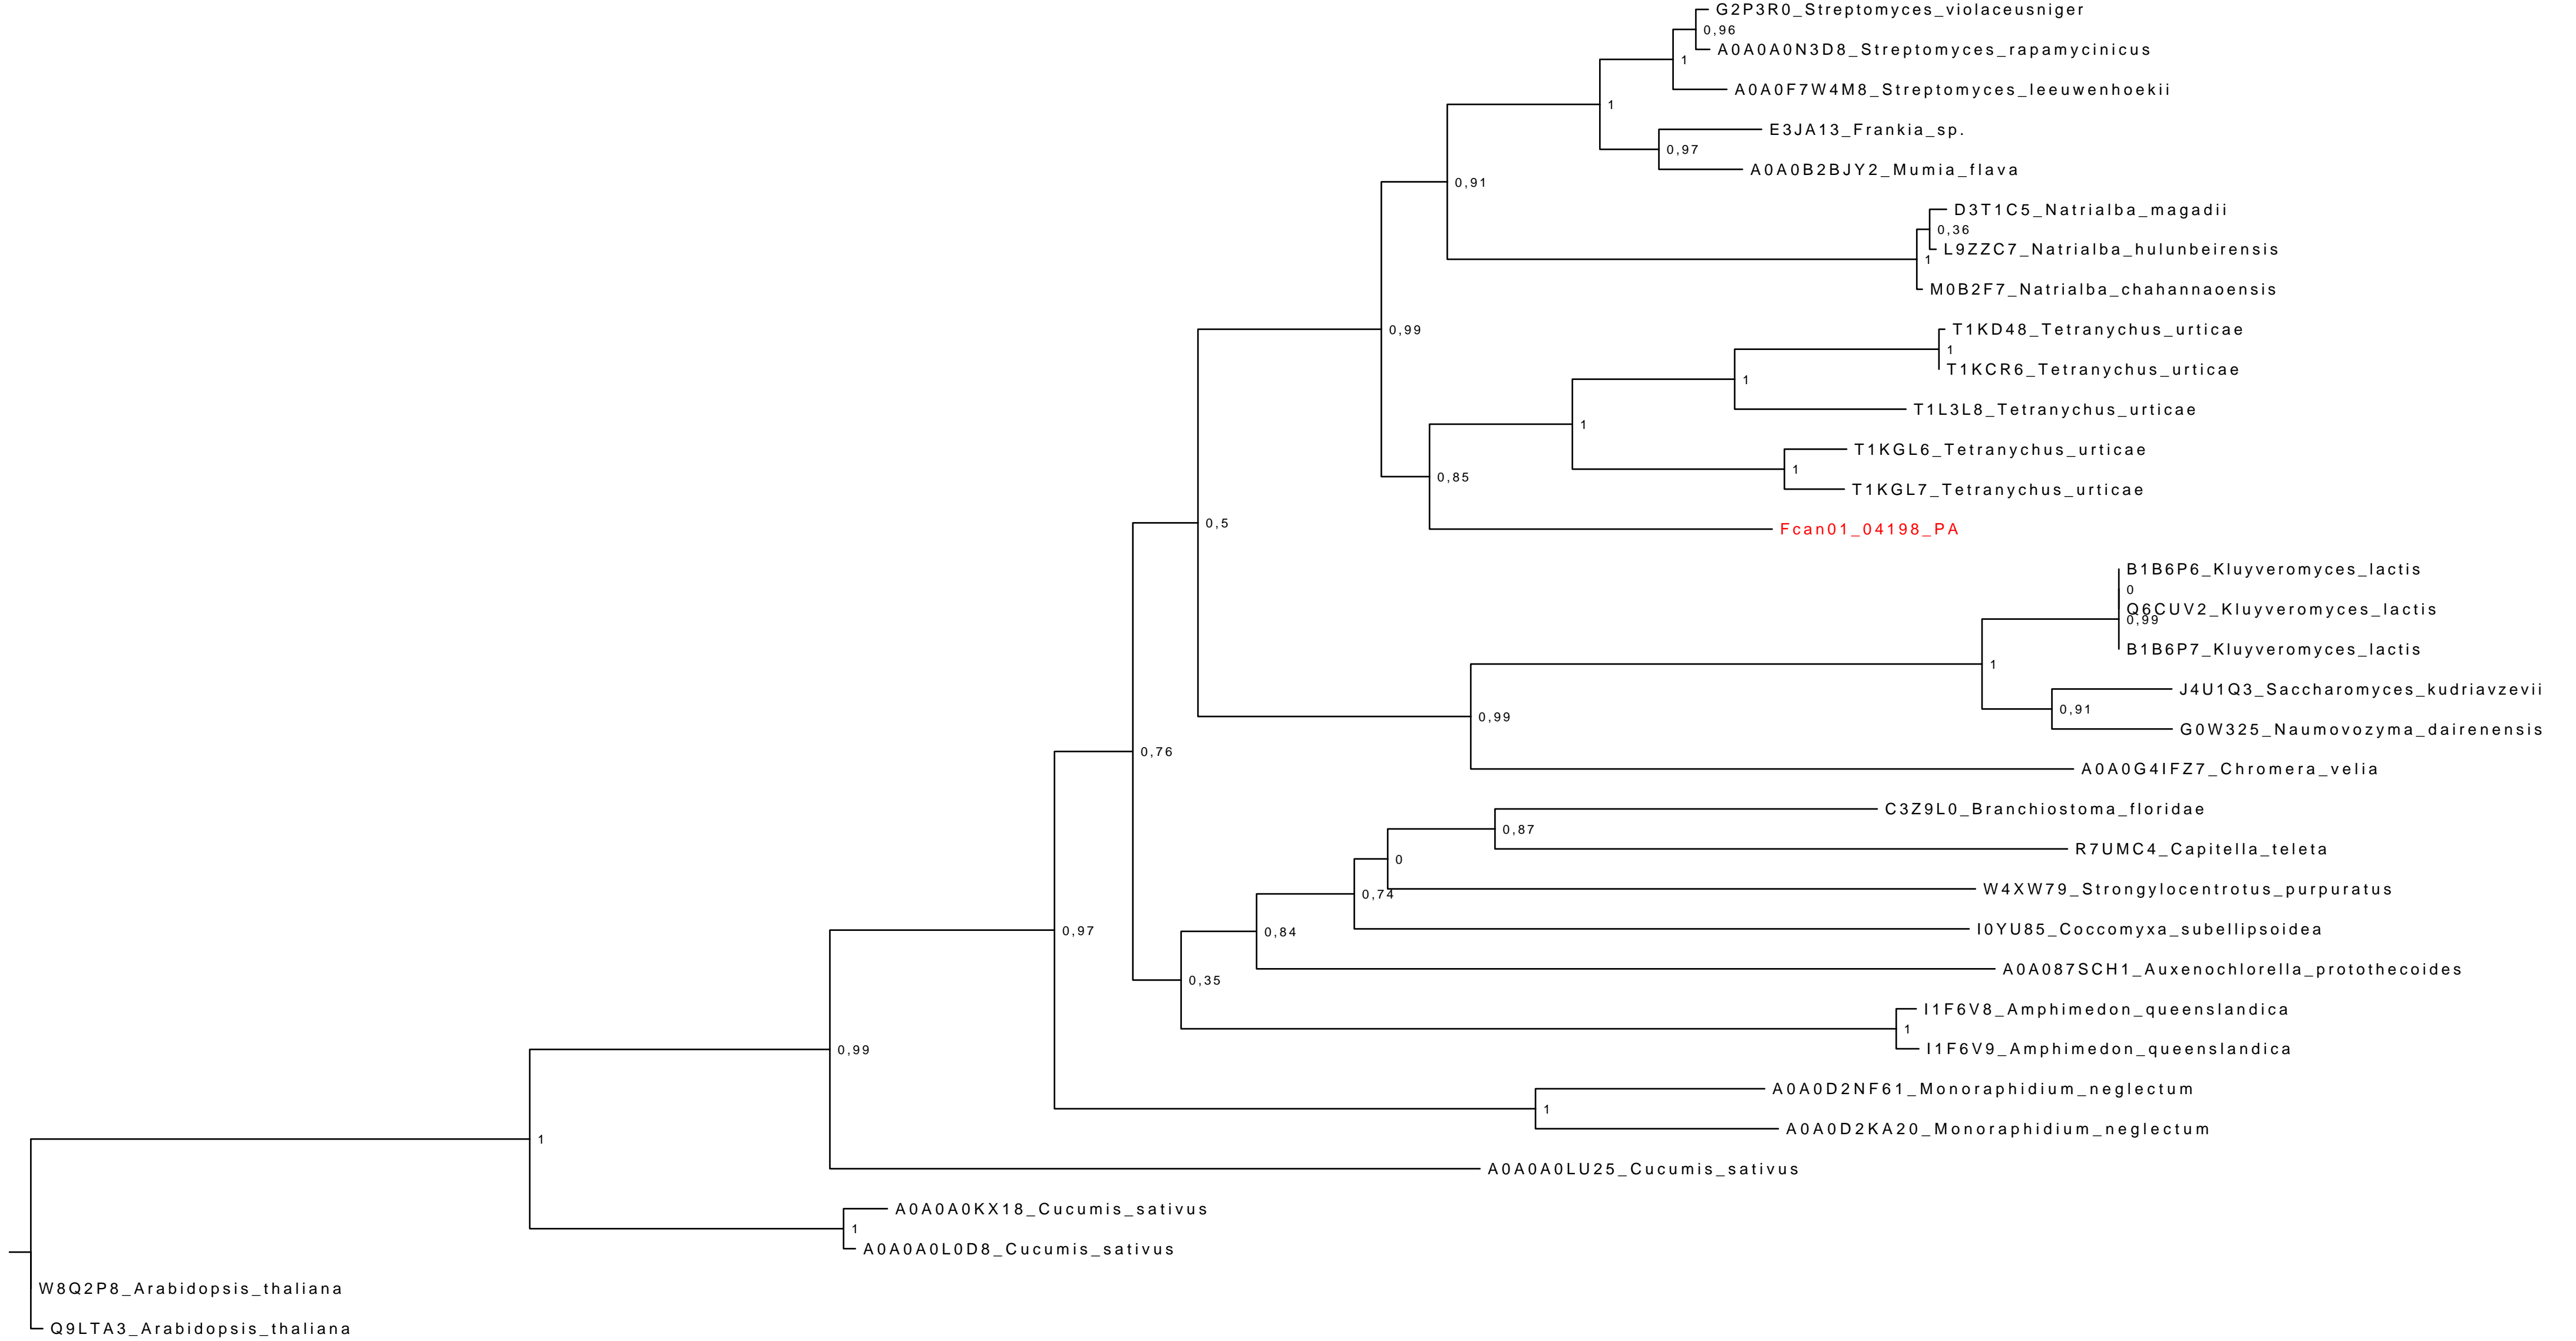

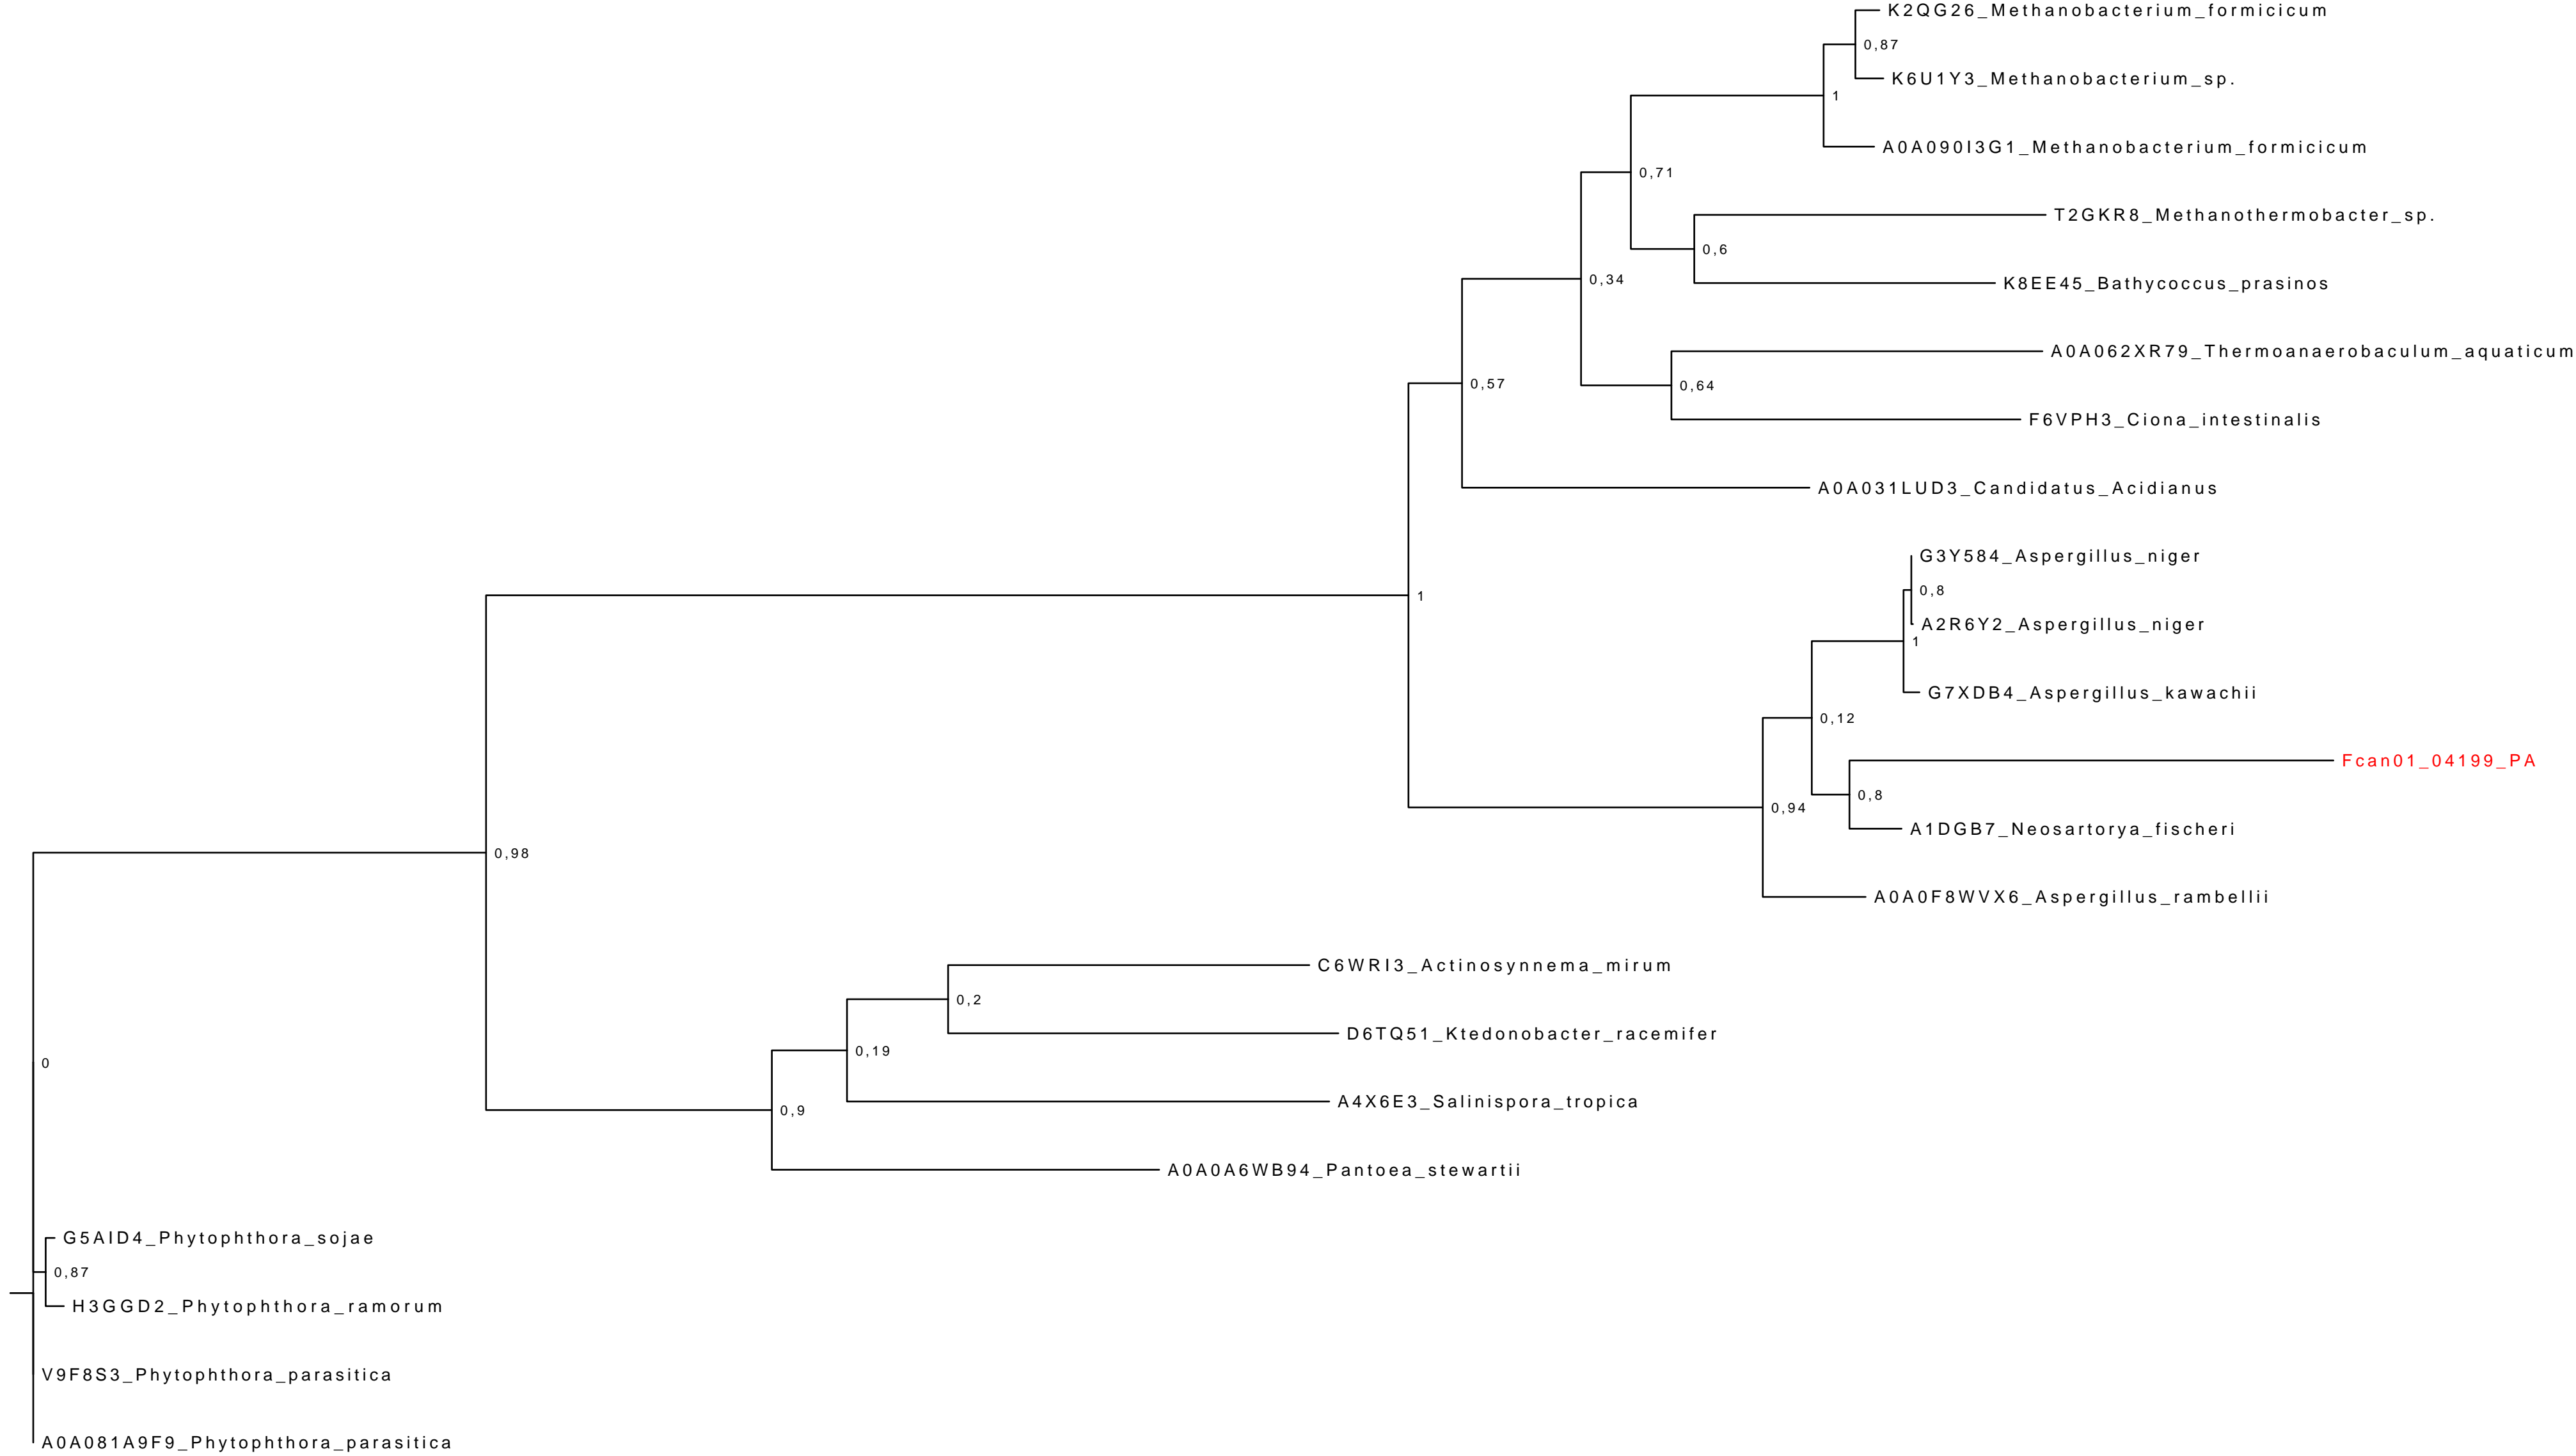

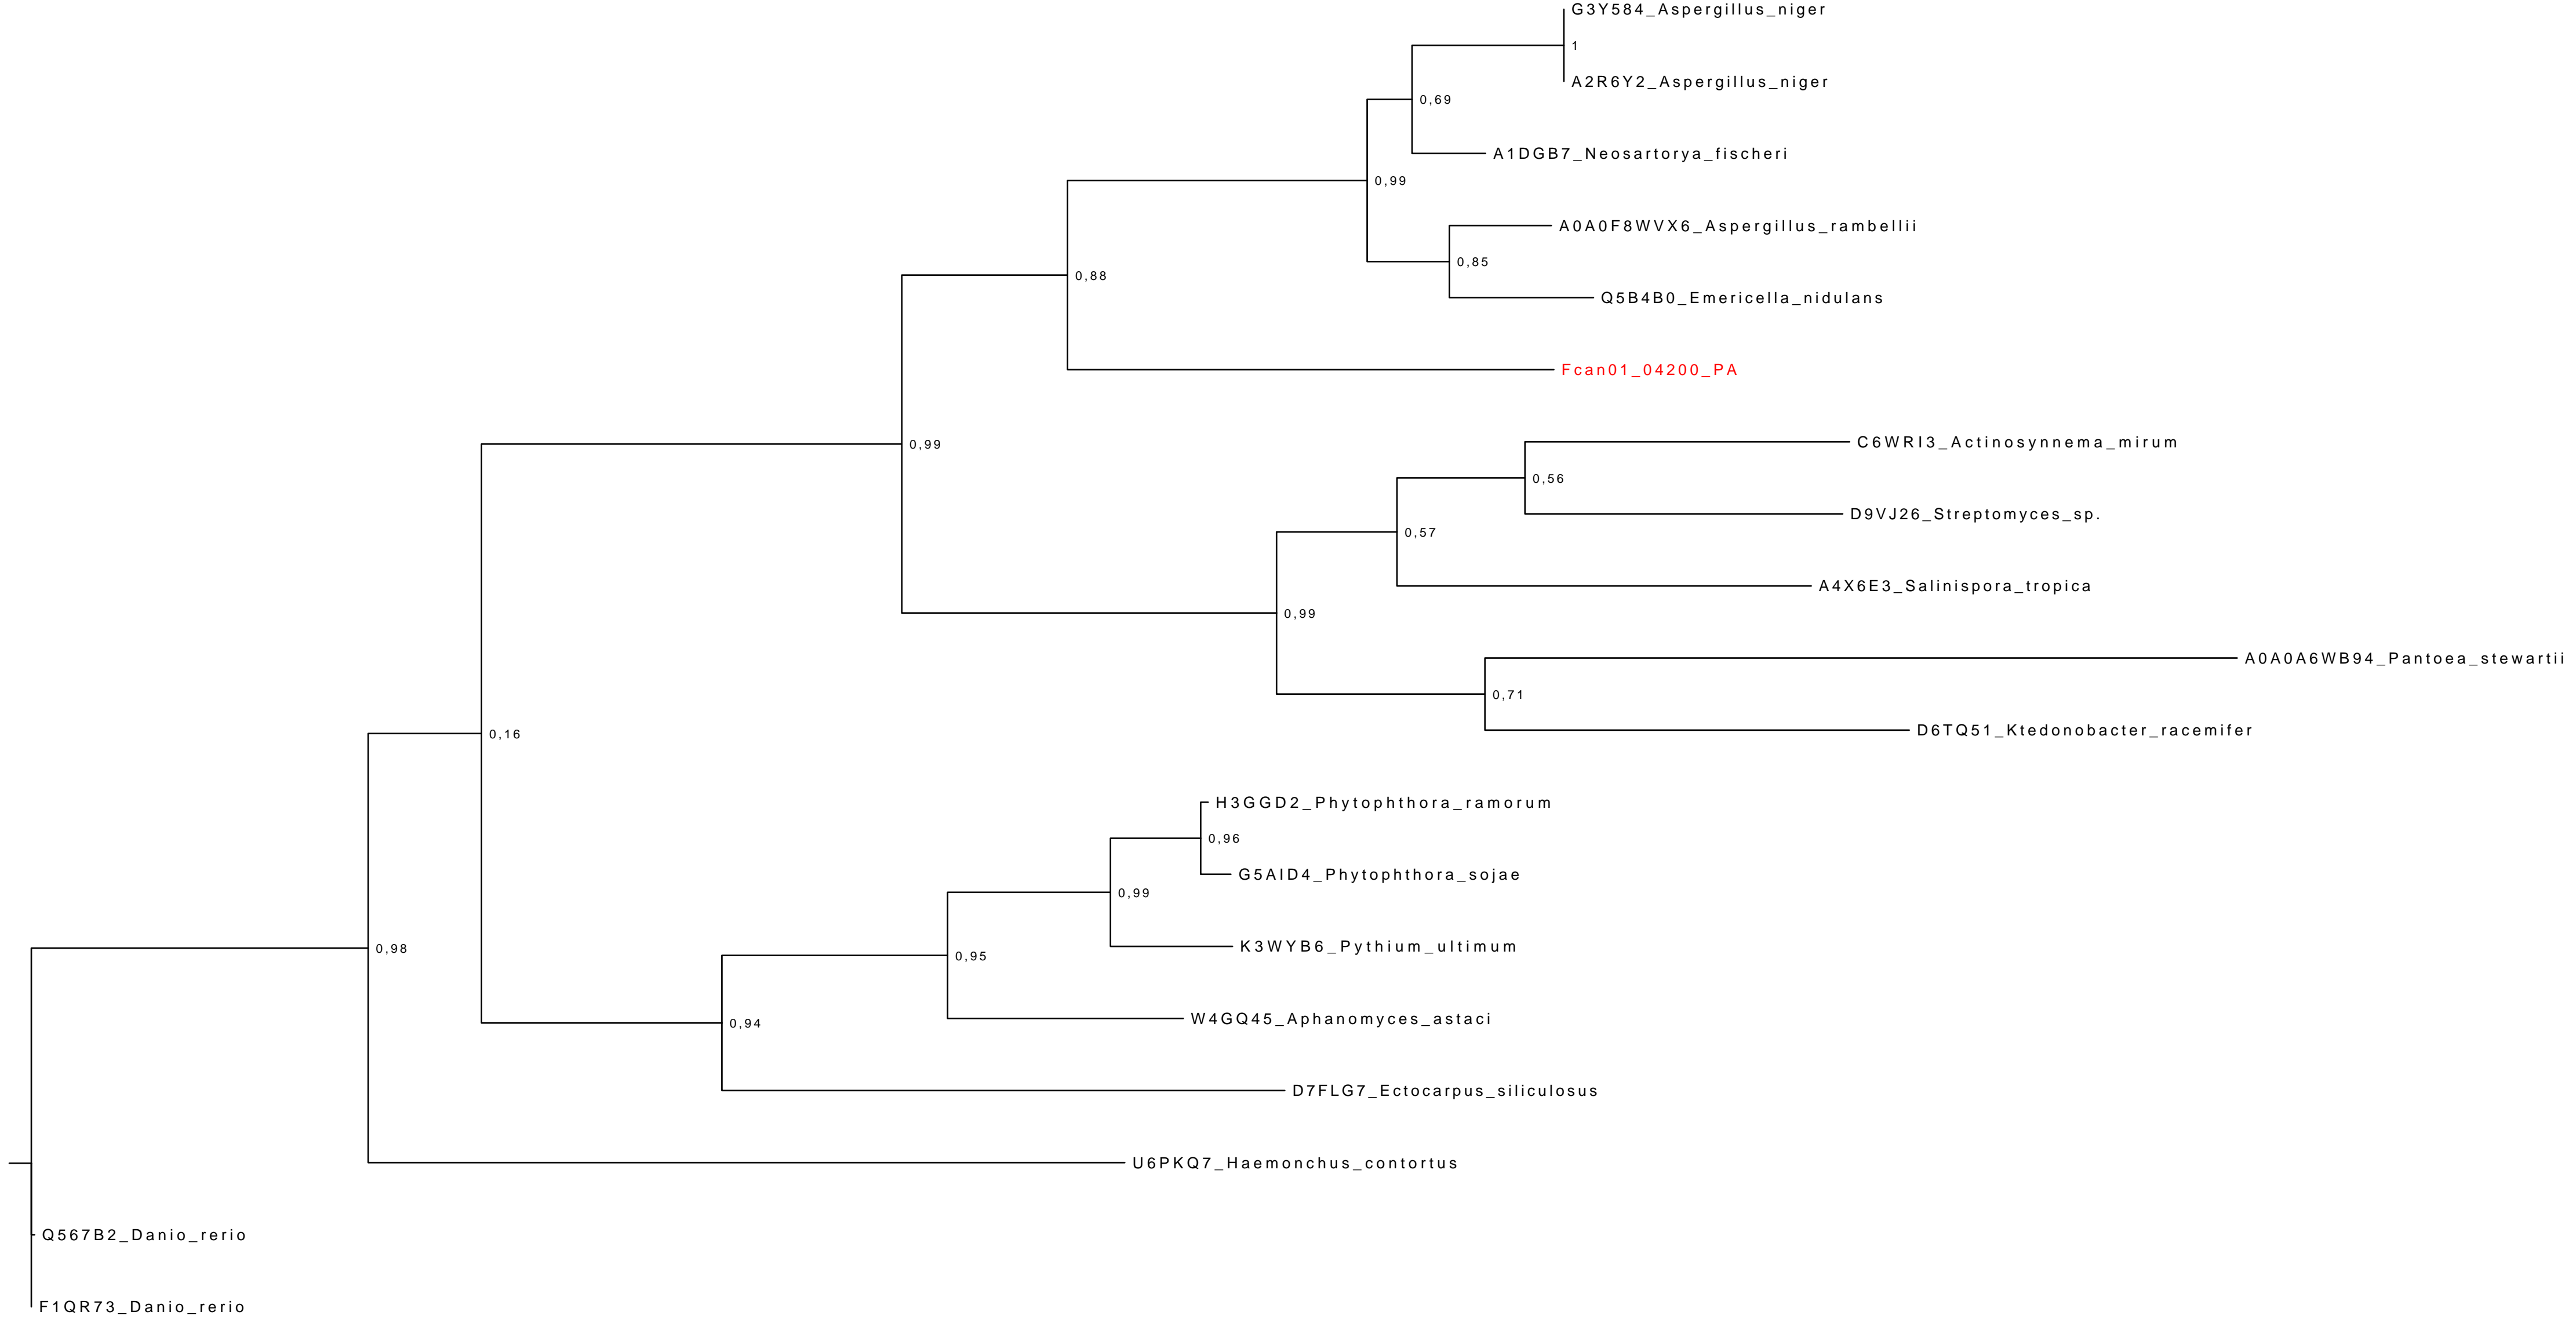

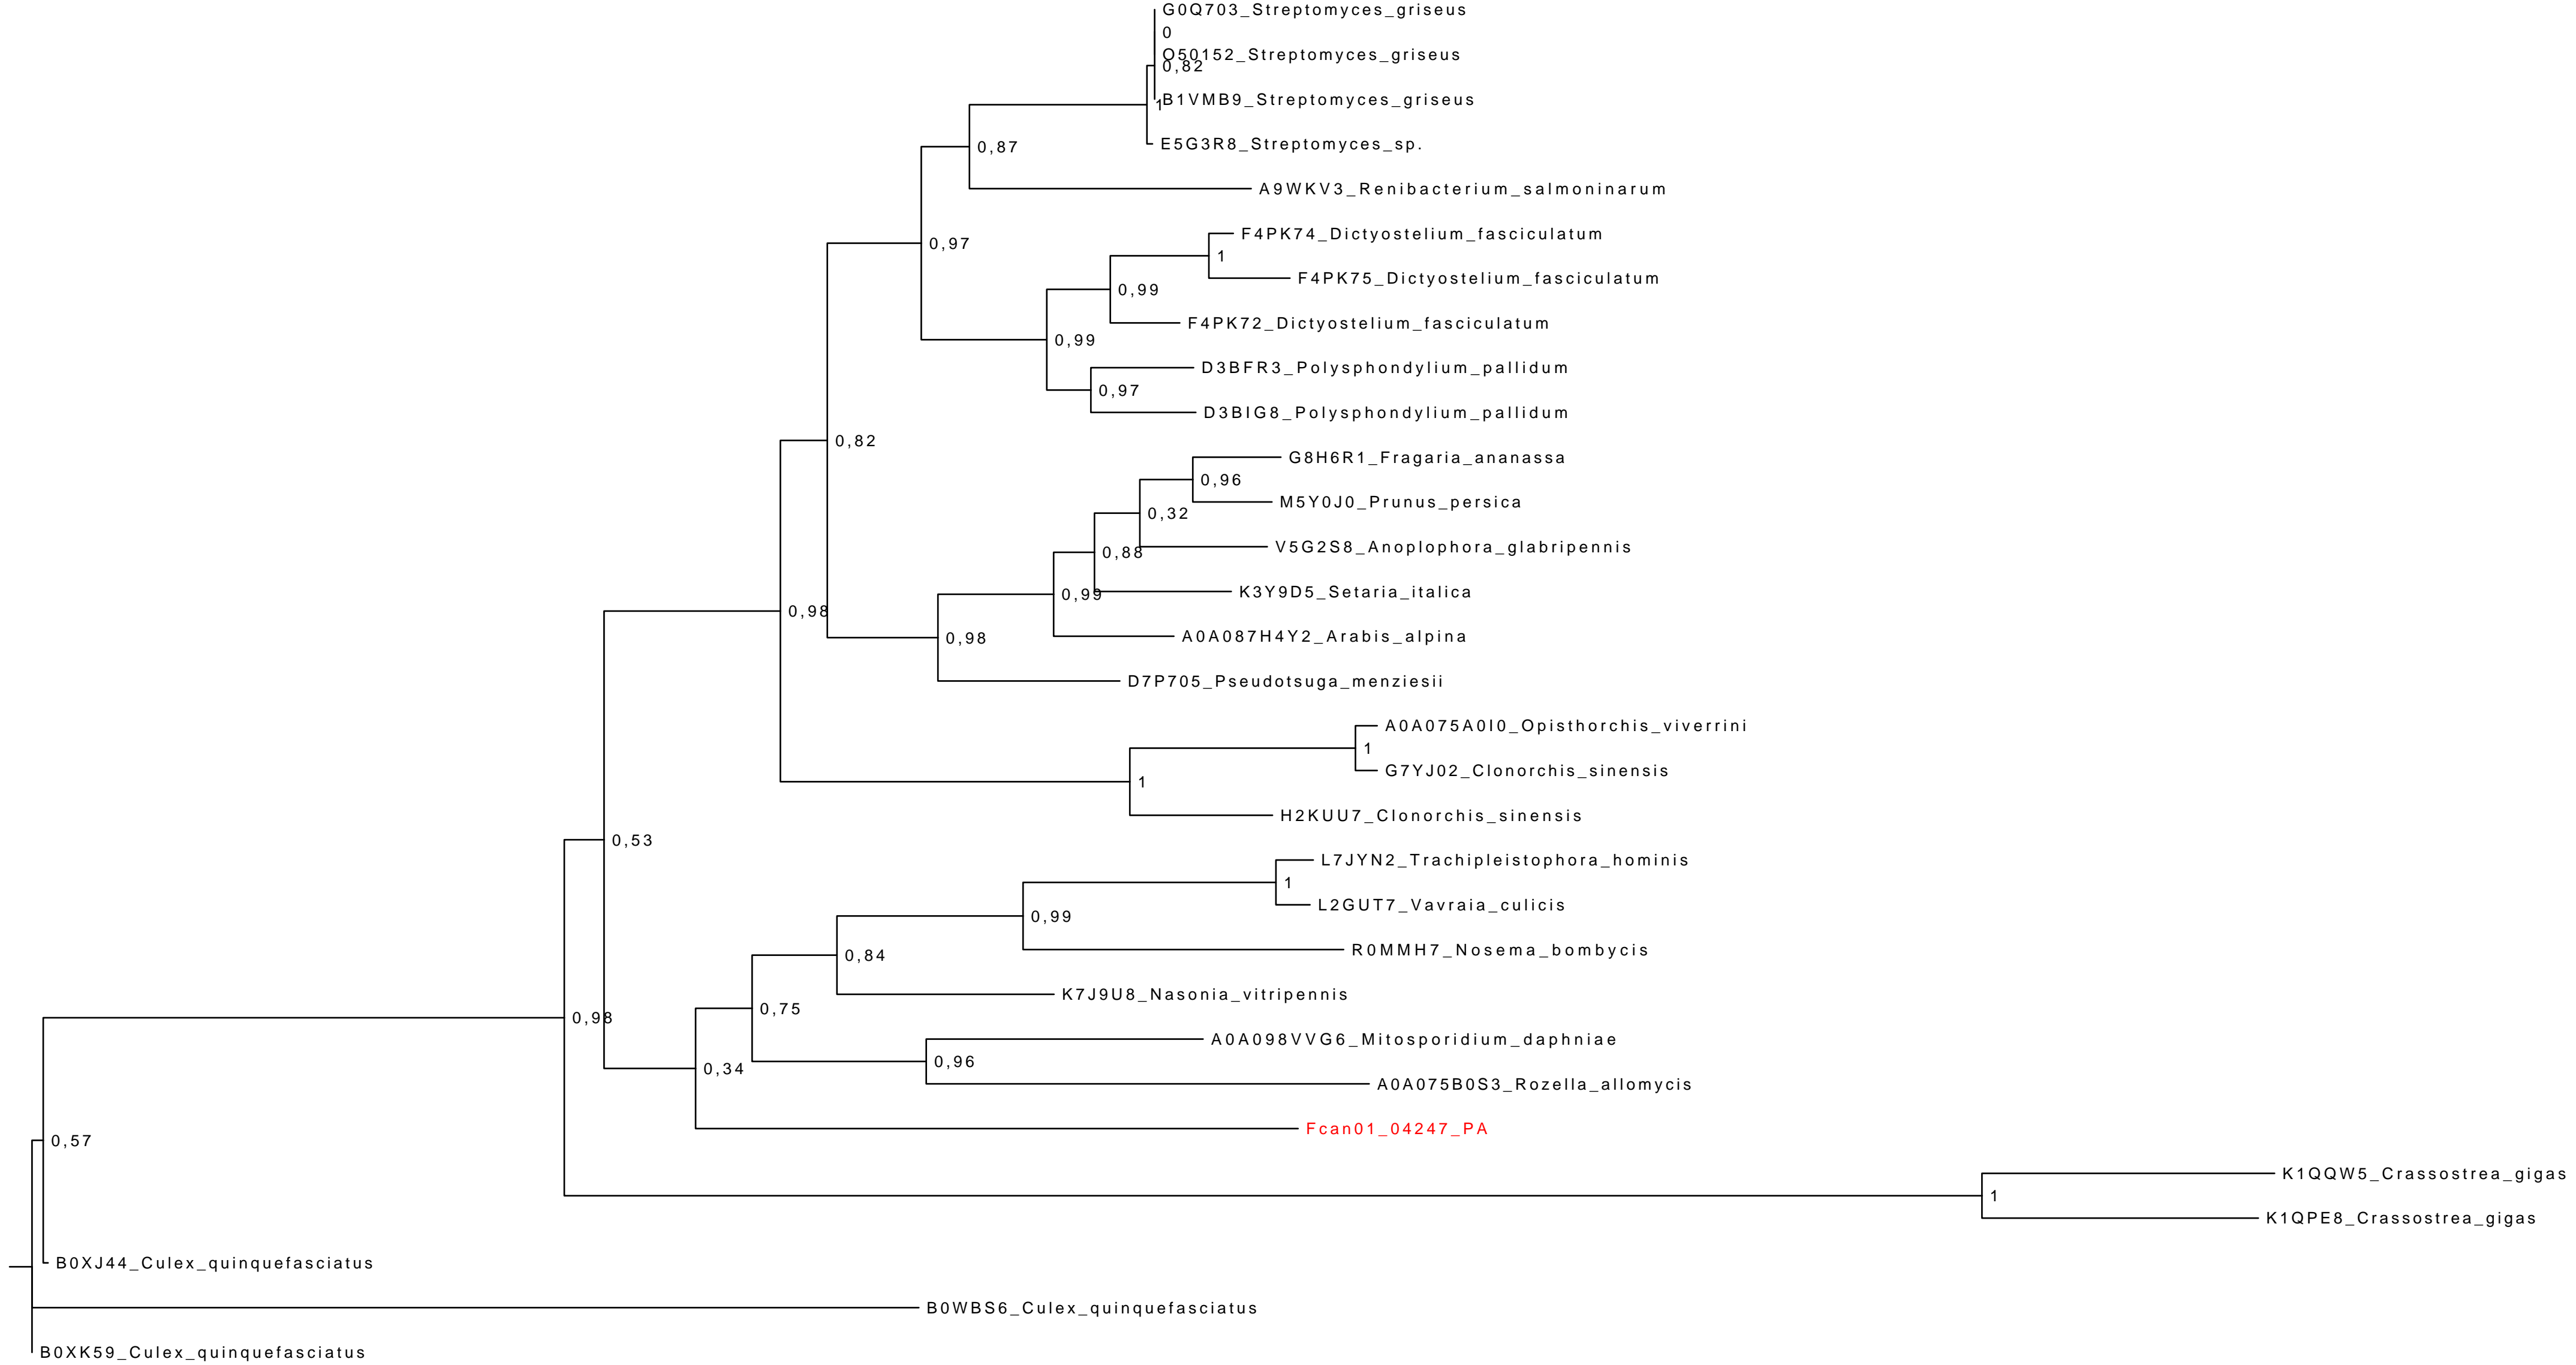



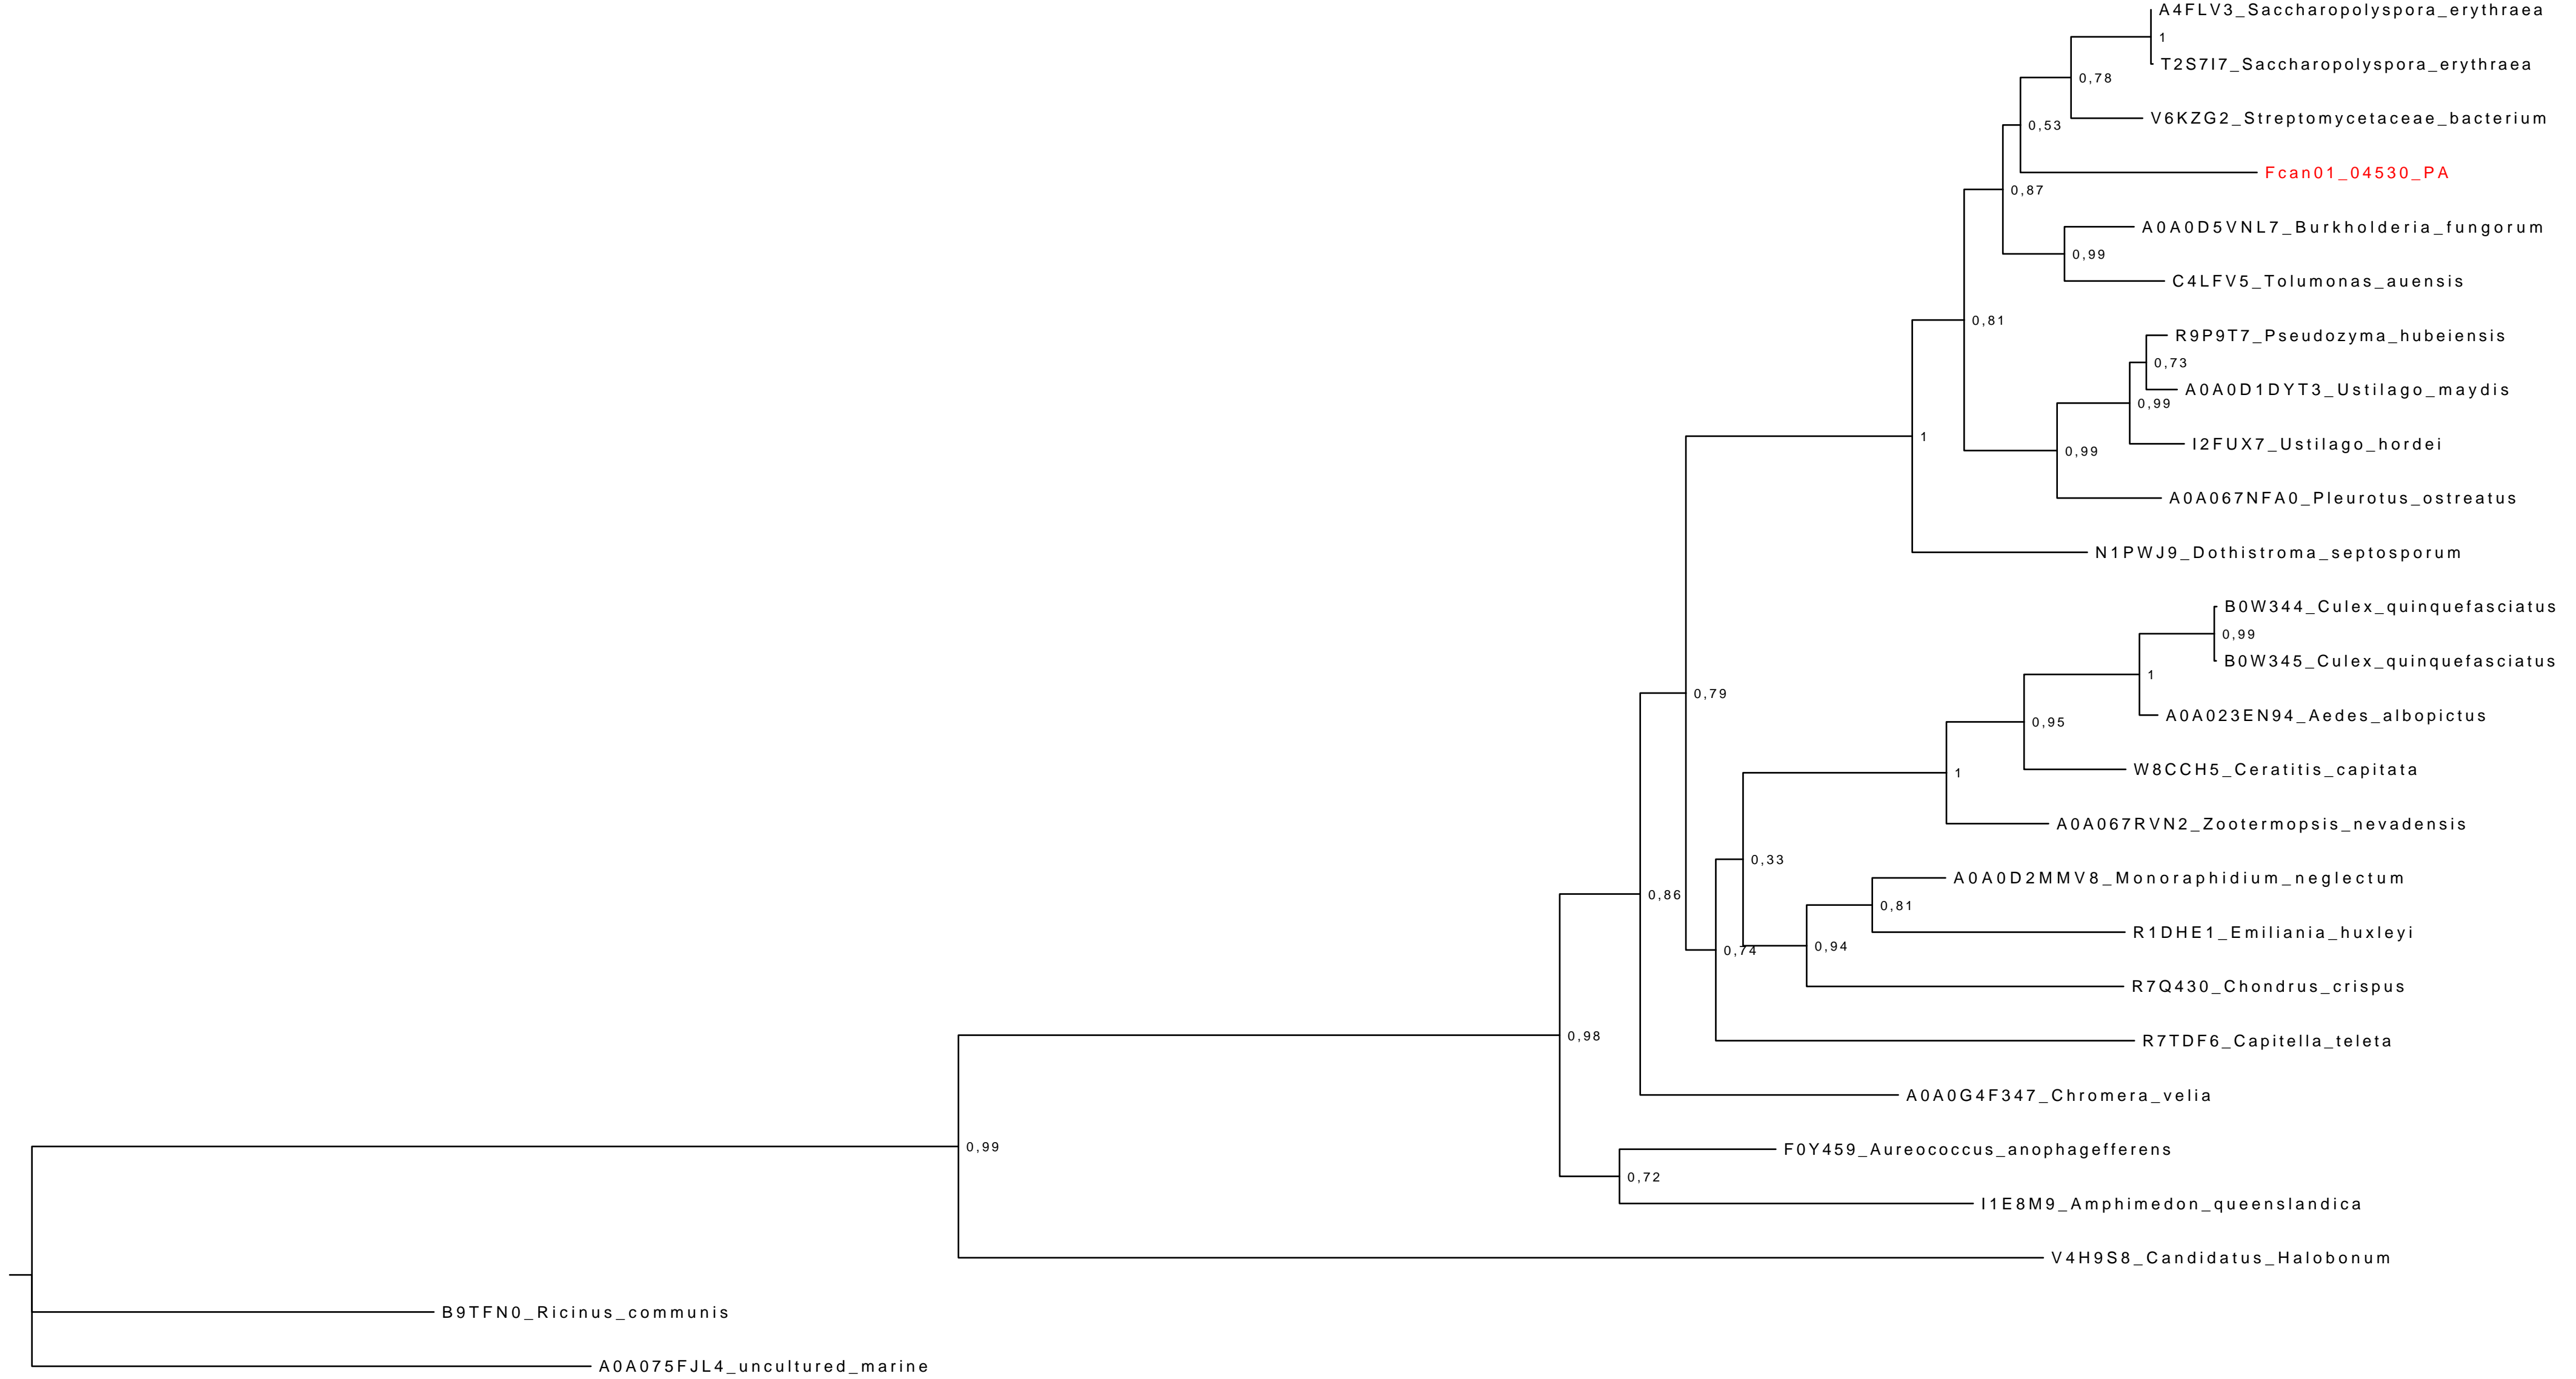

0.5

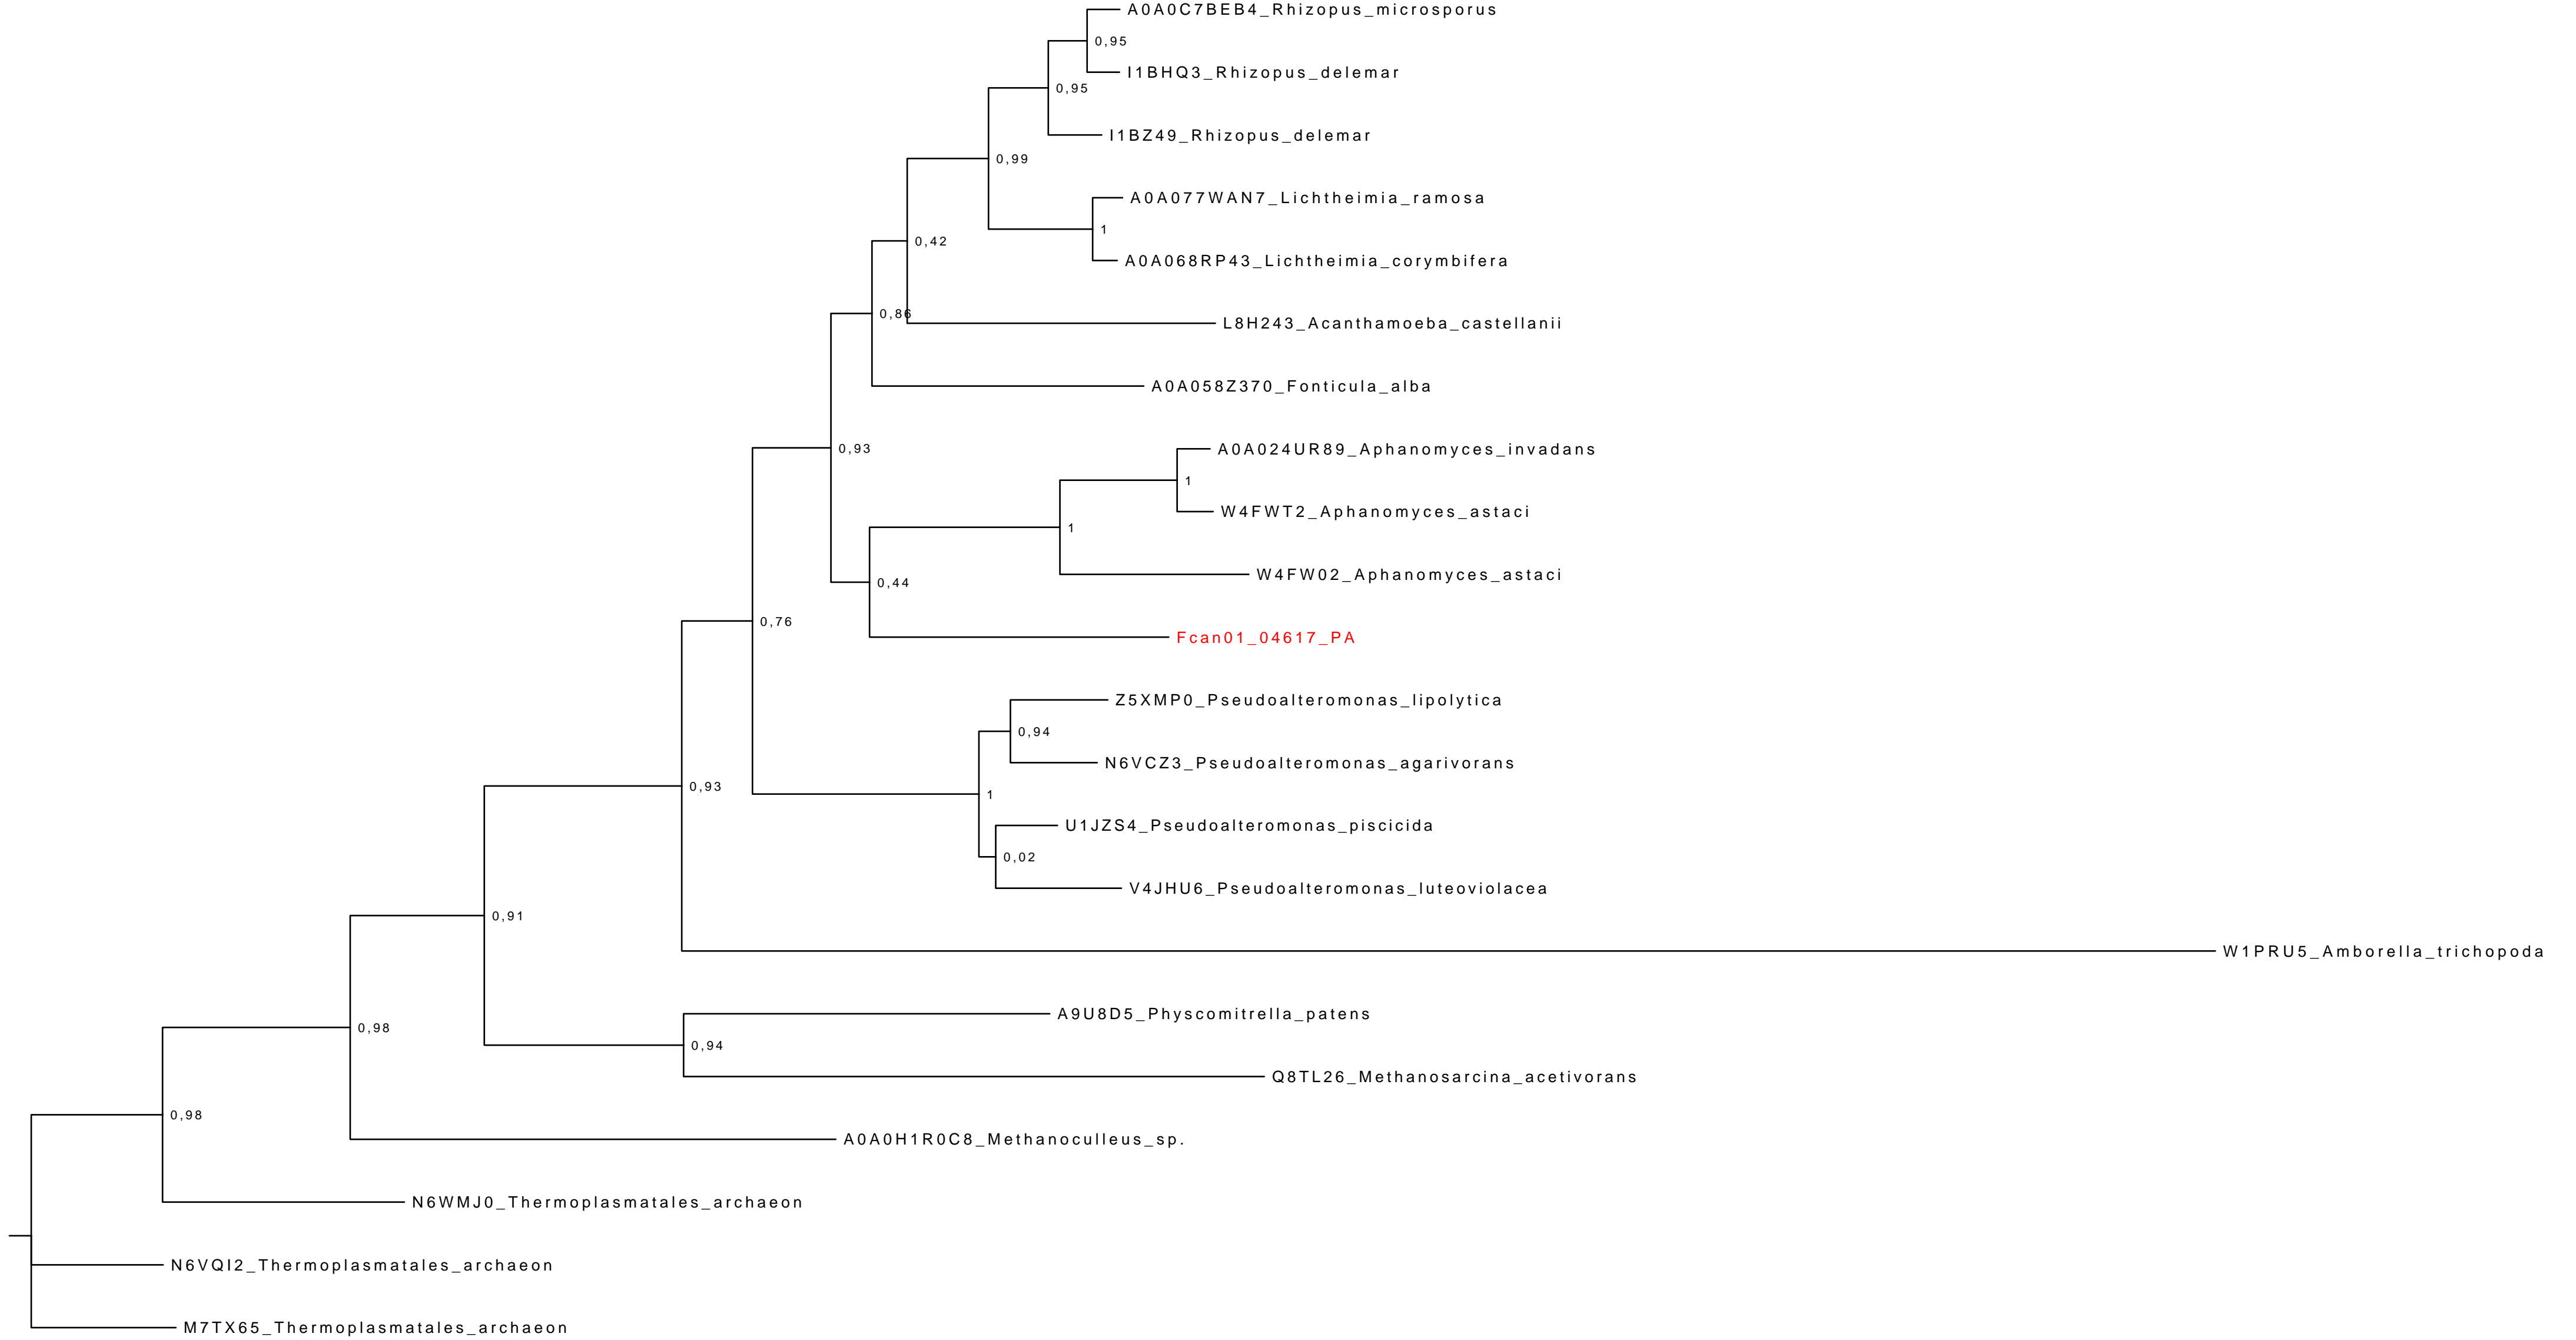

0.7

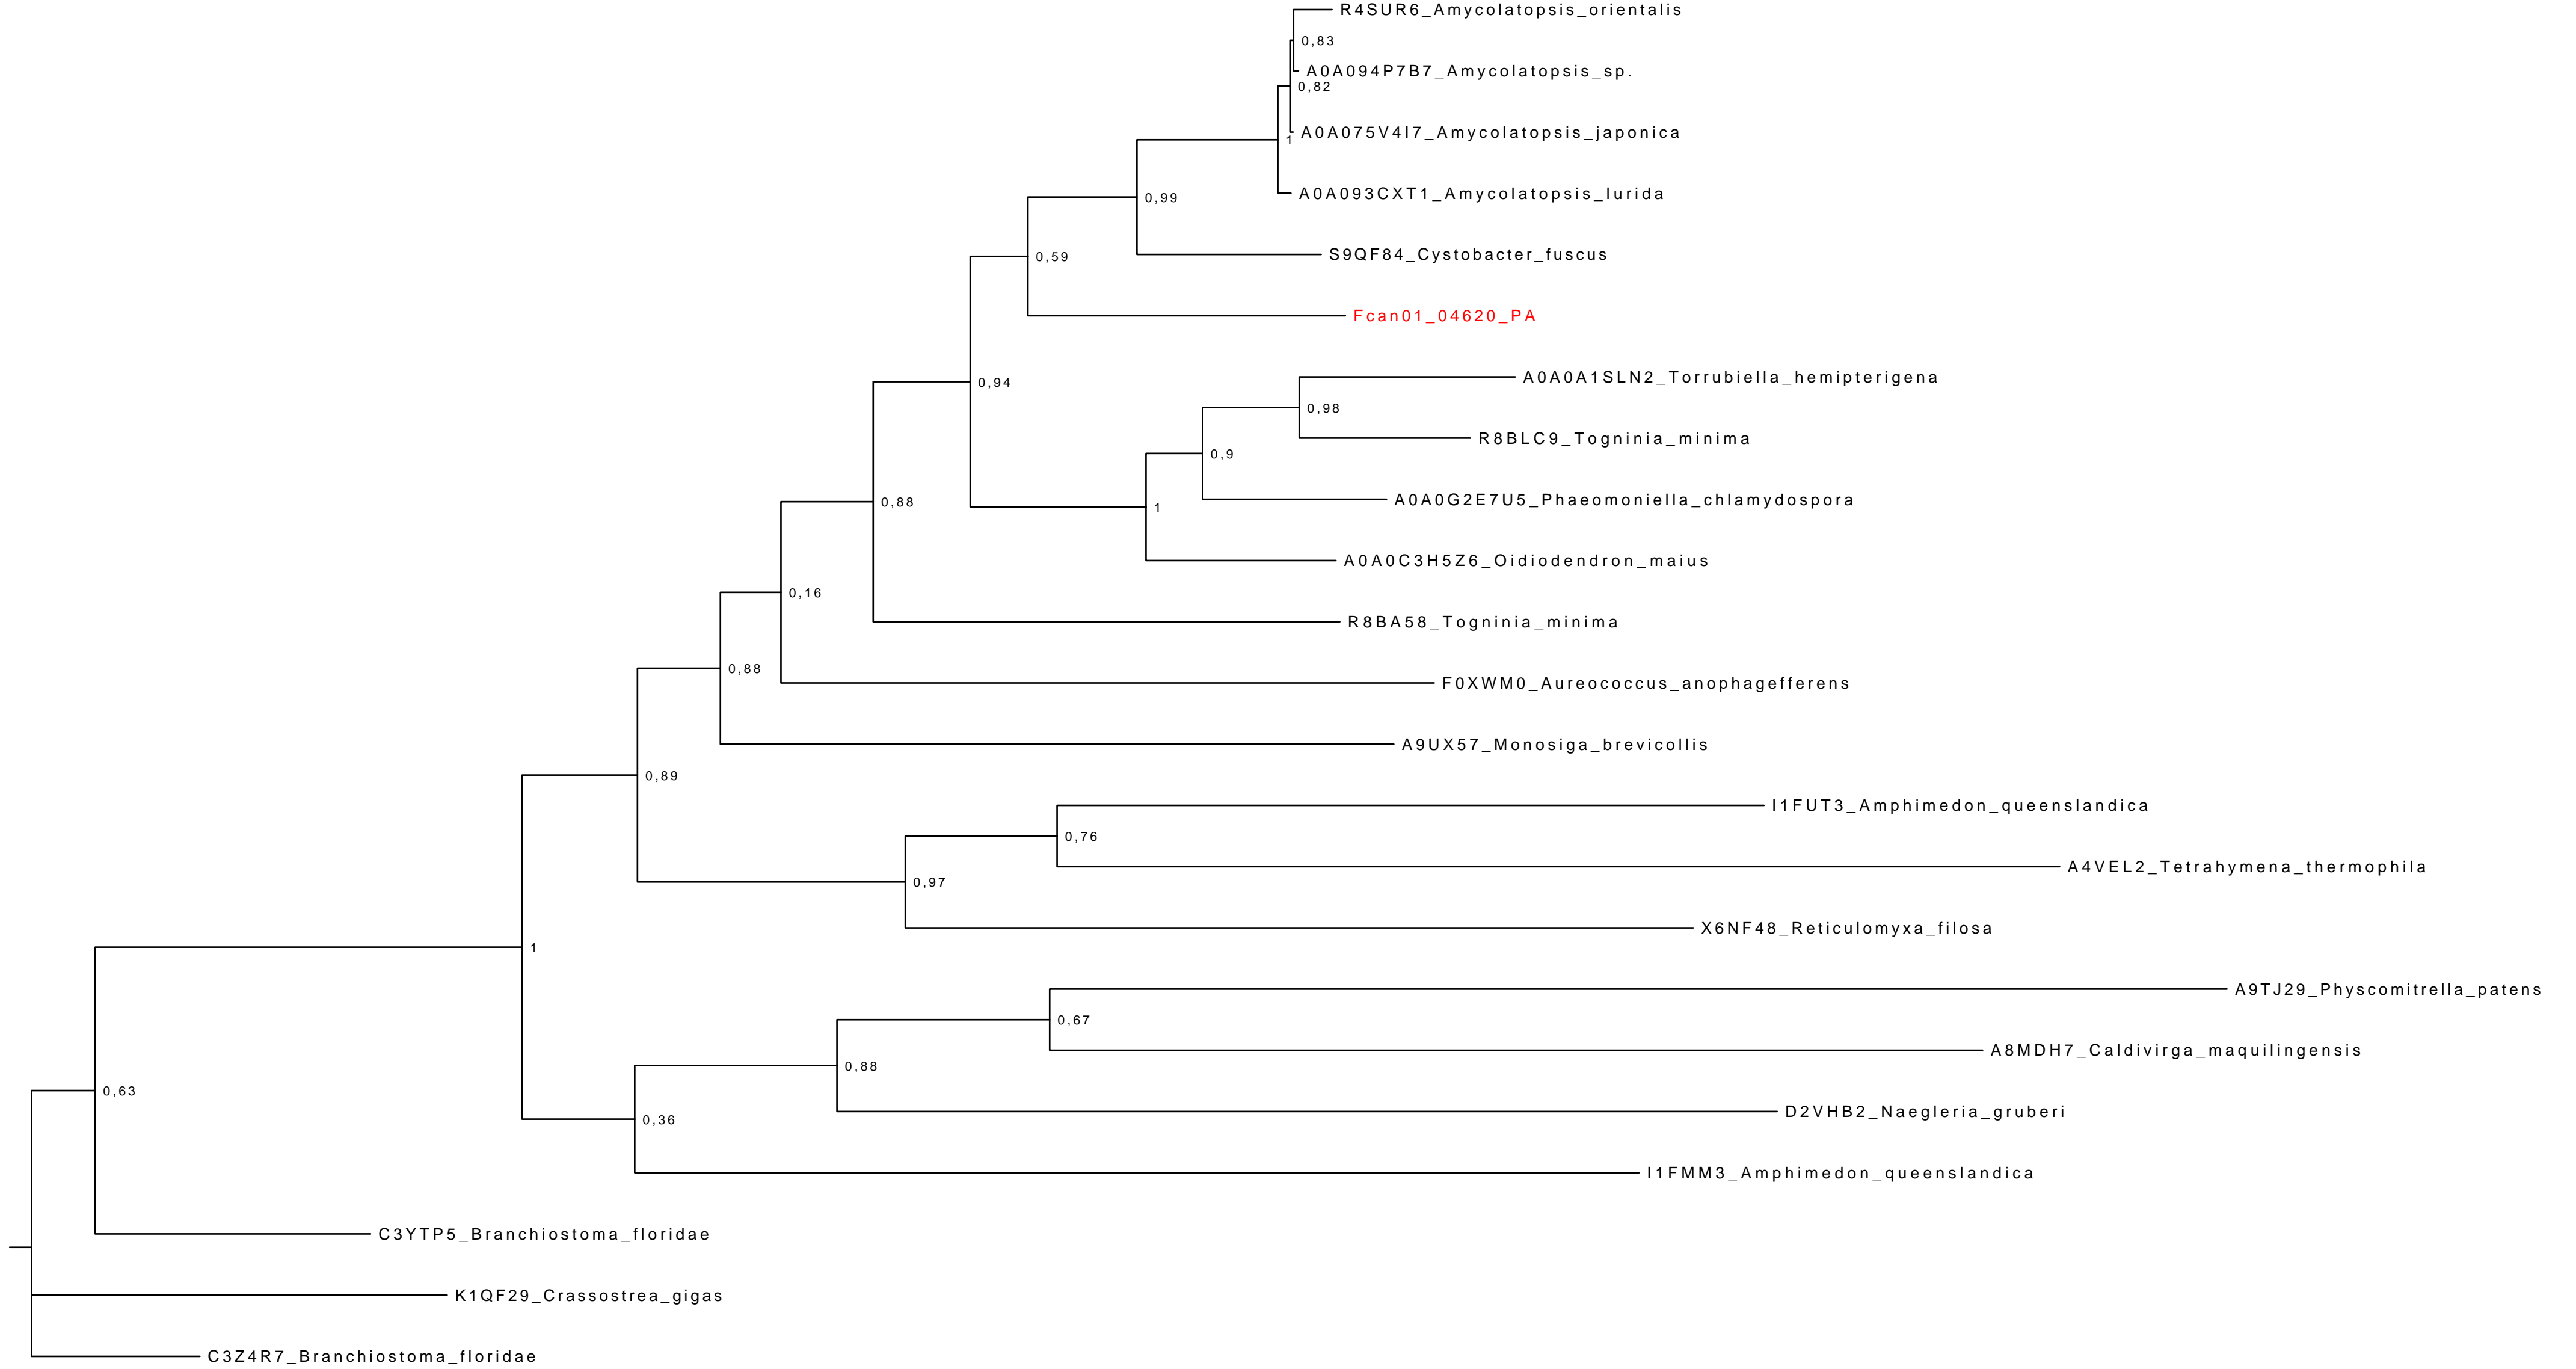

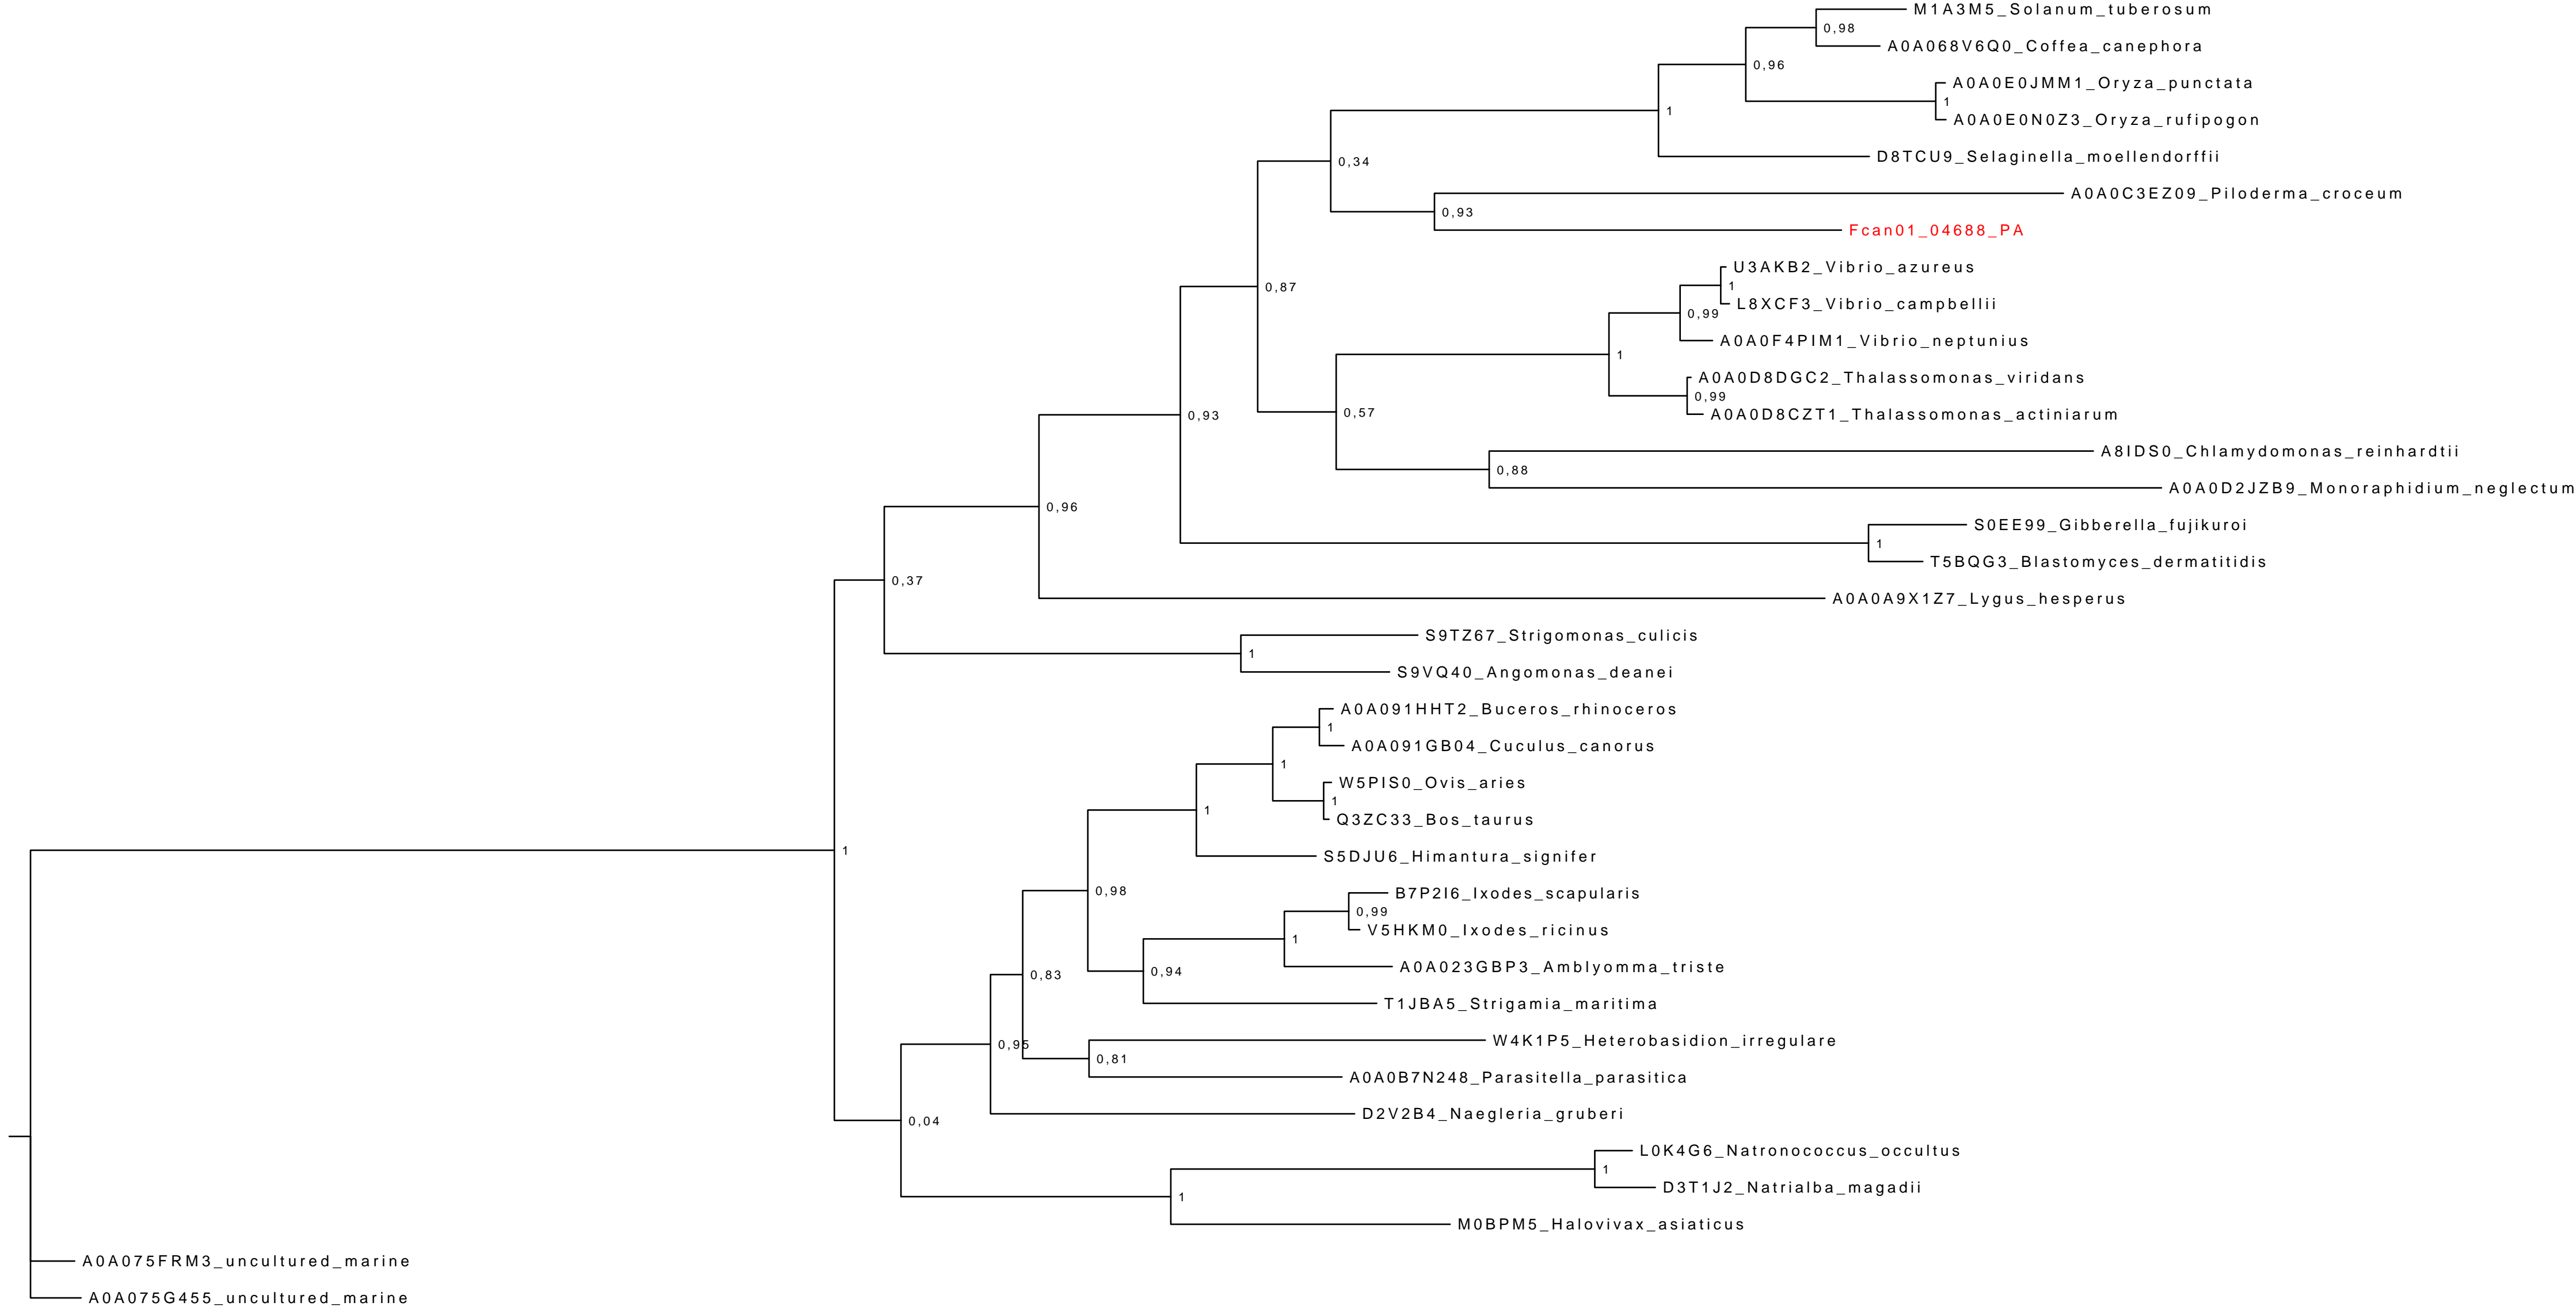

0.5

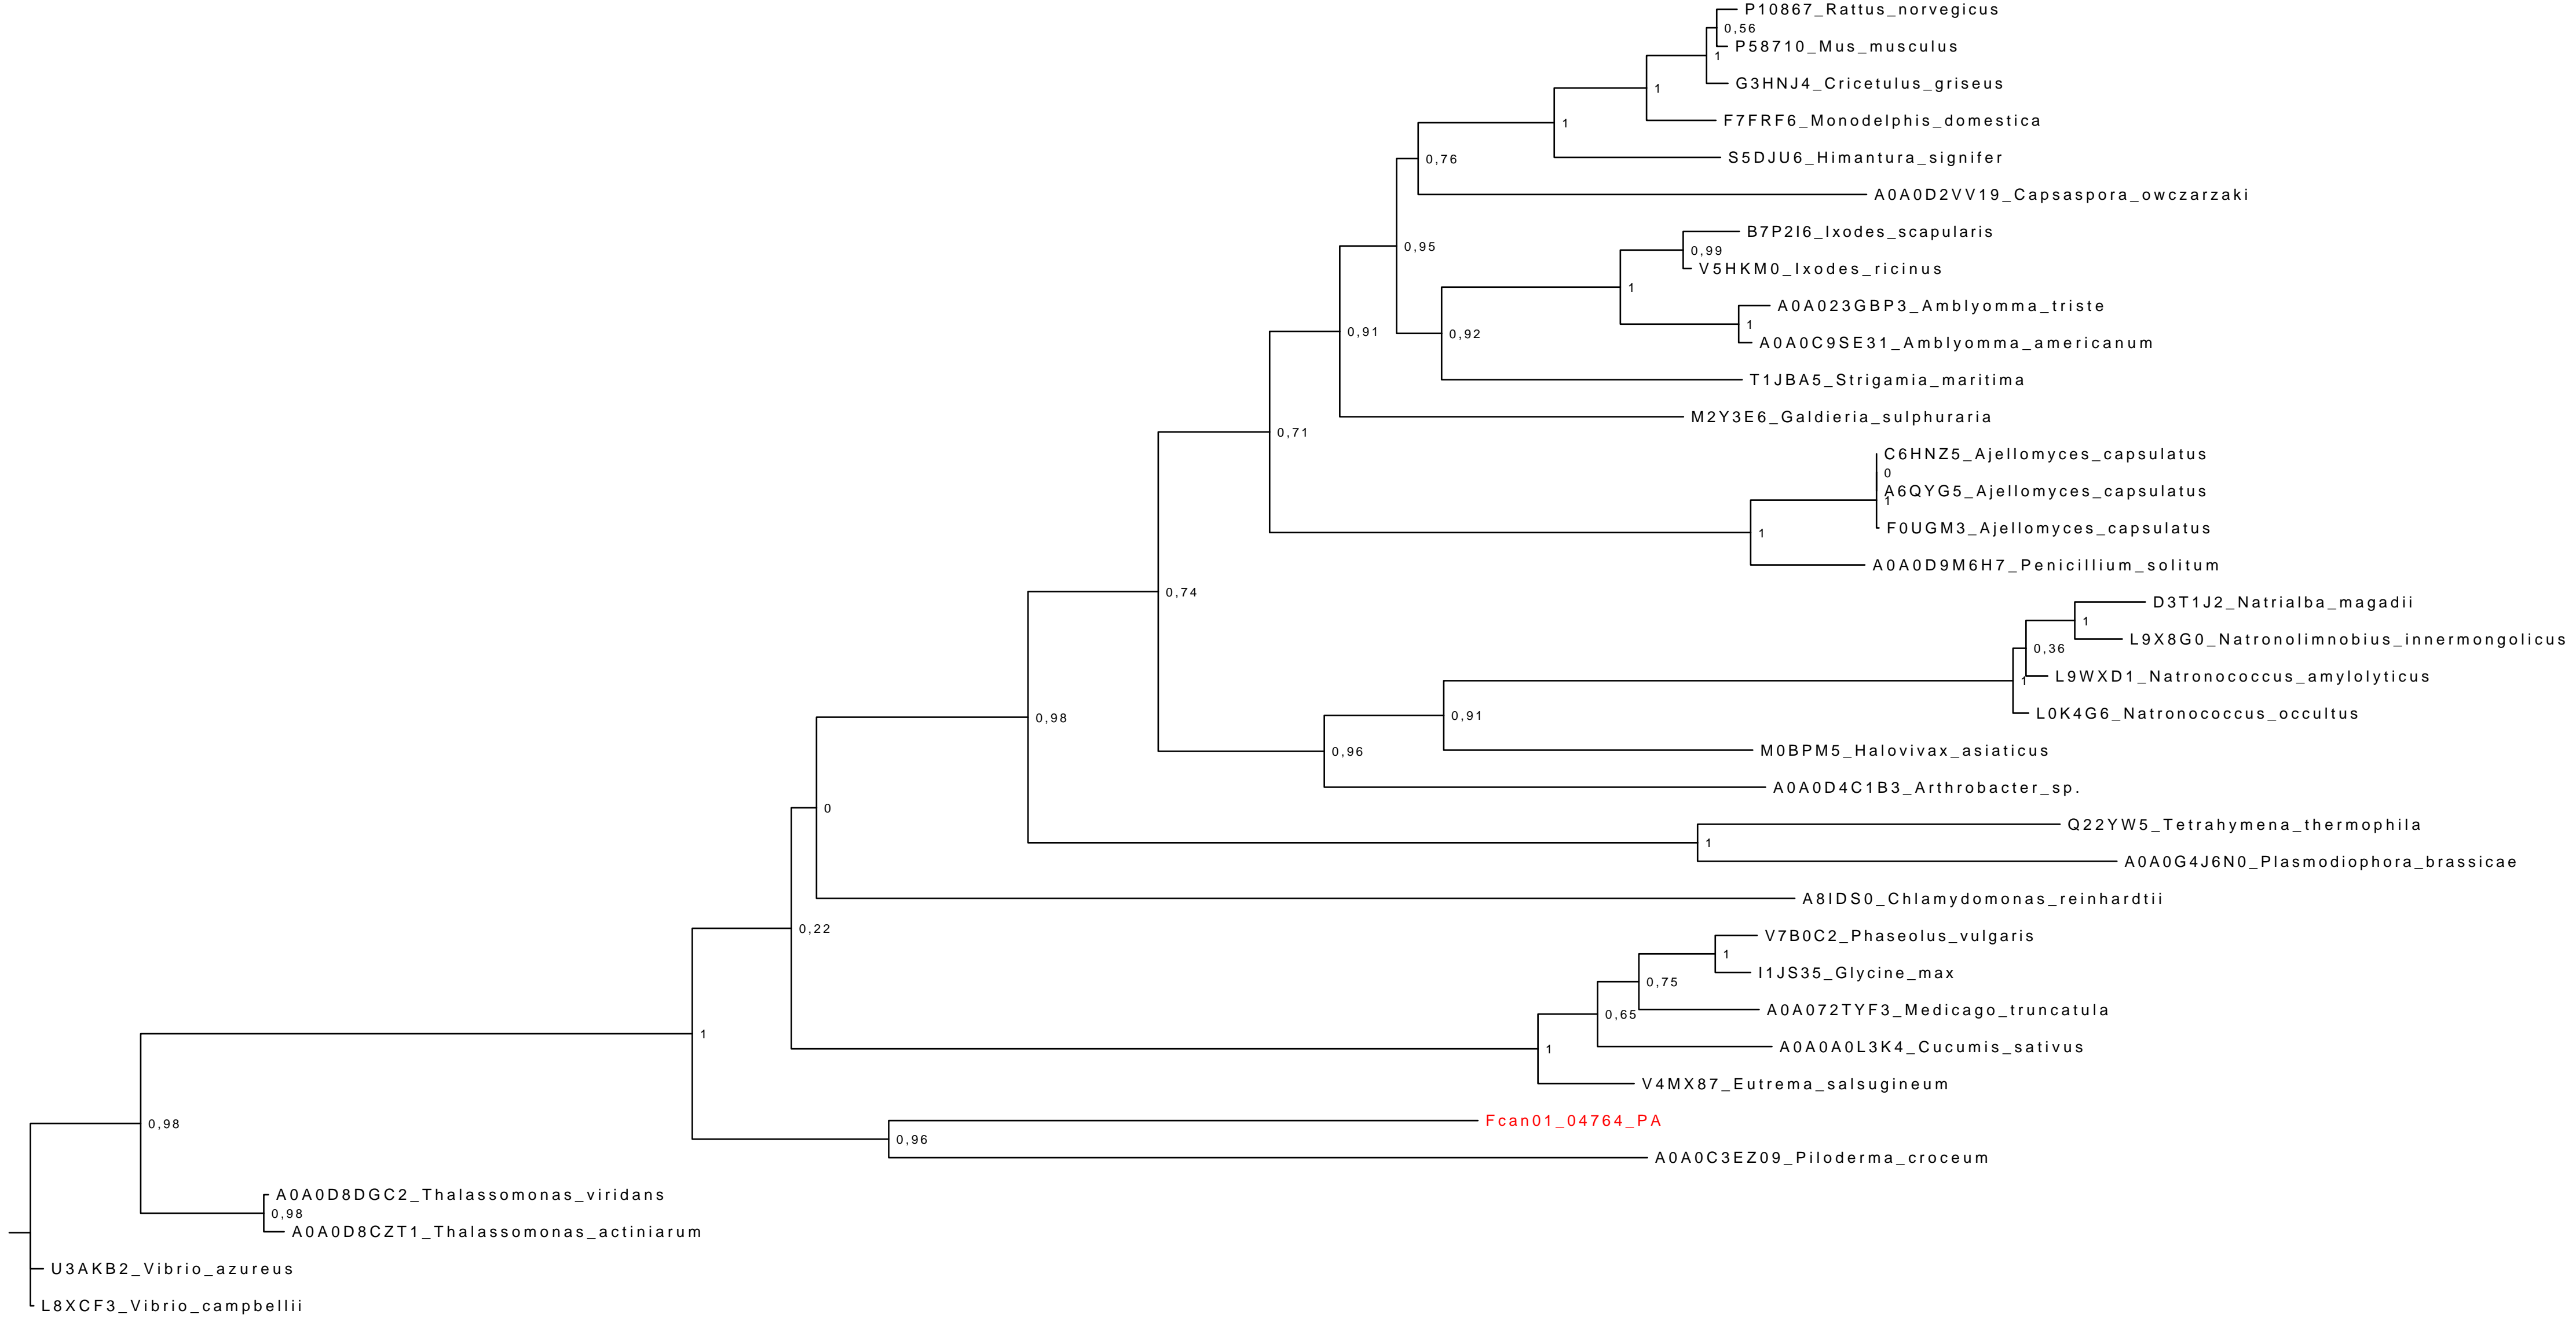

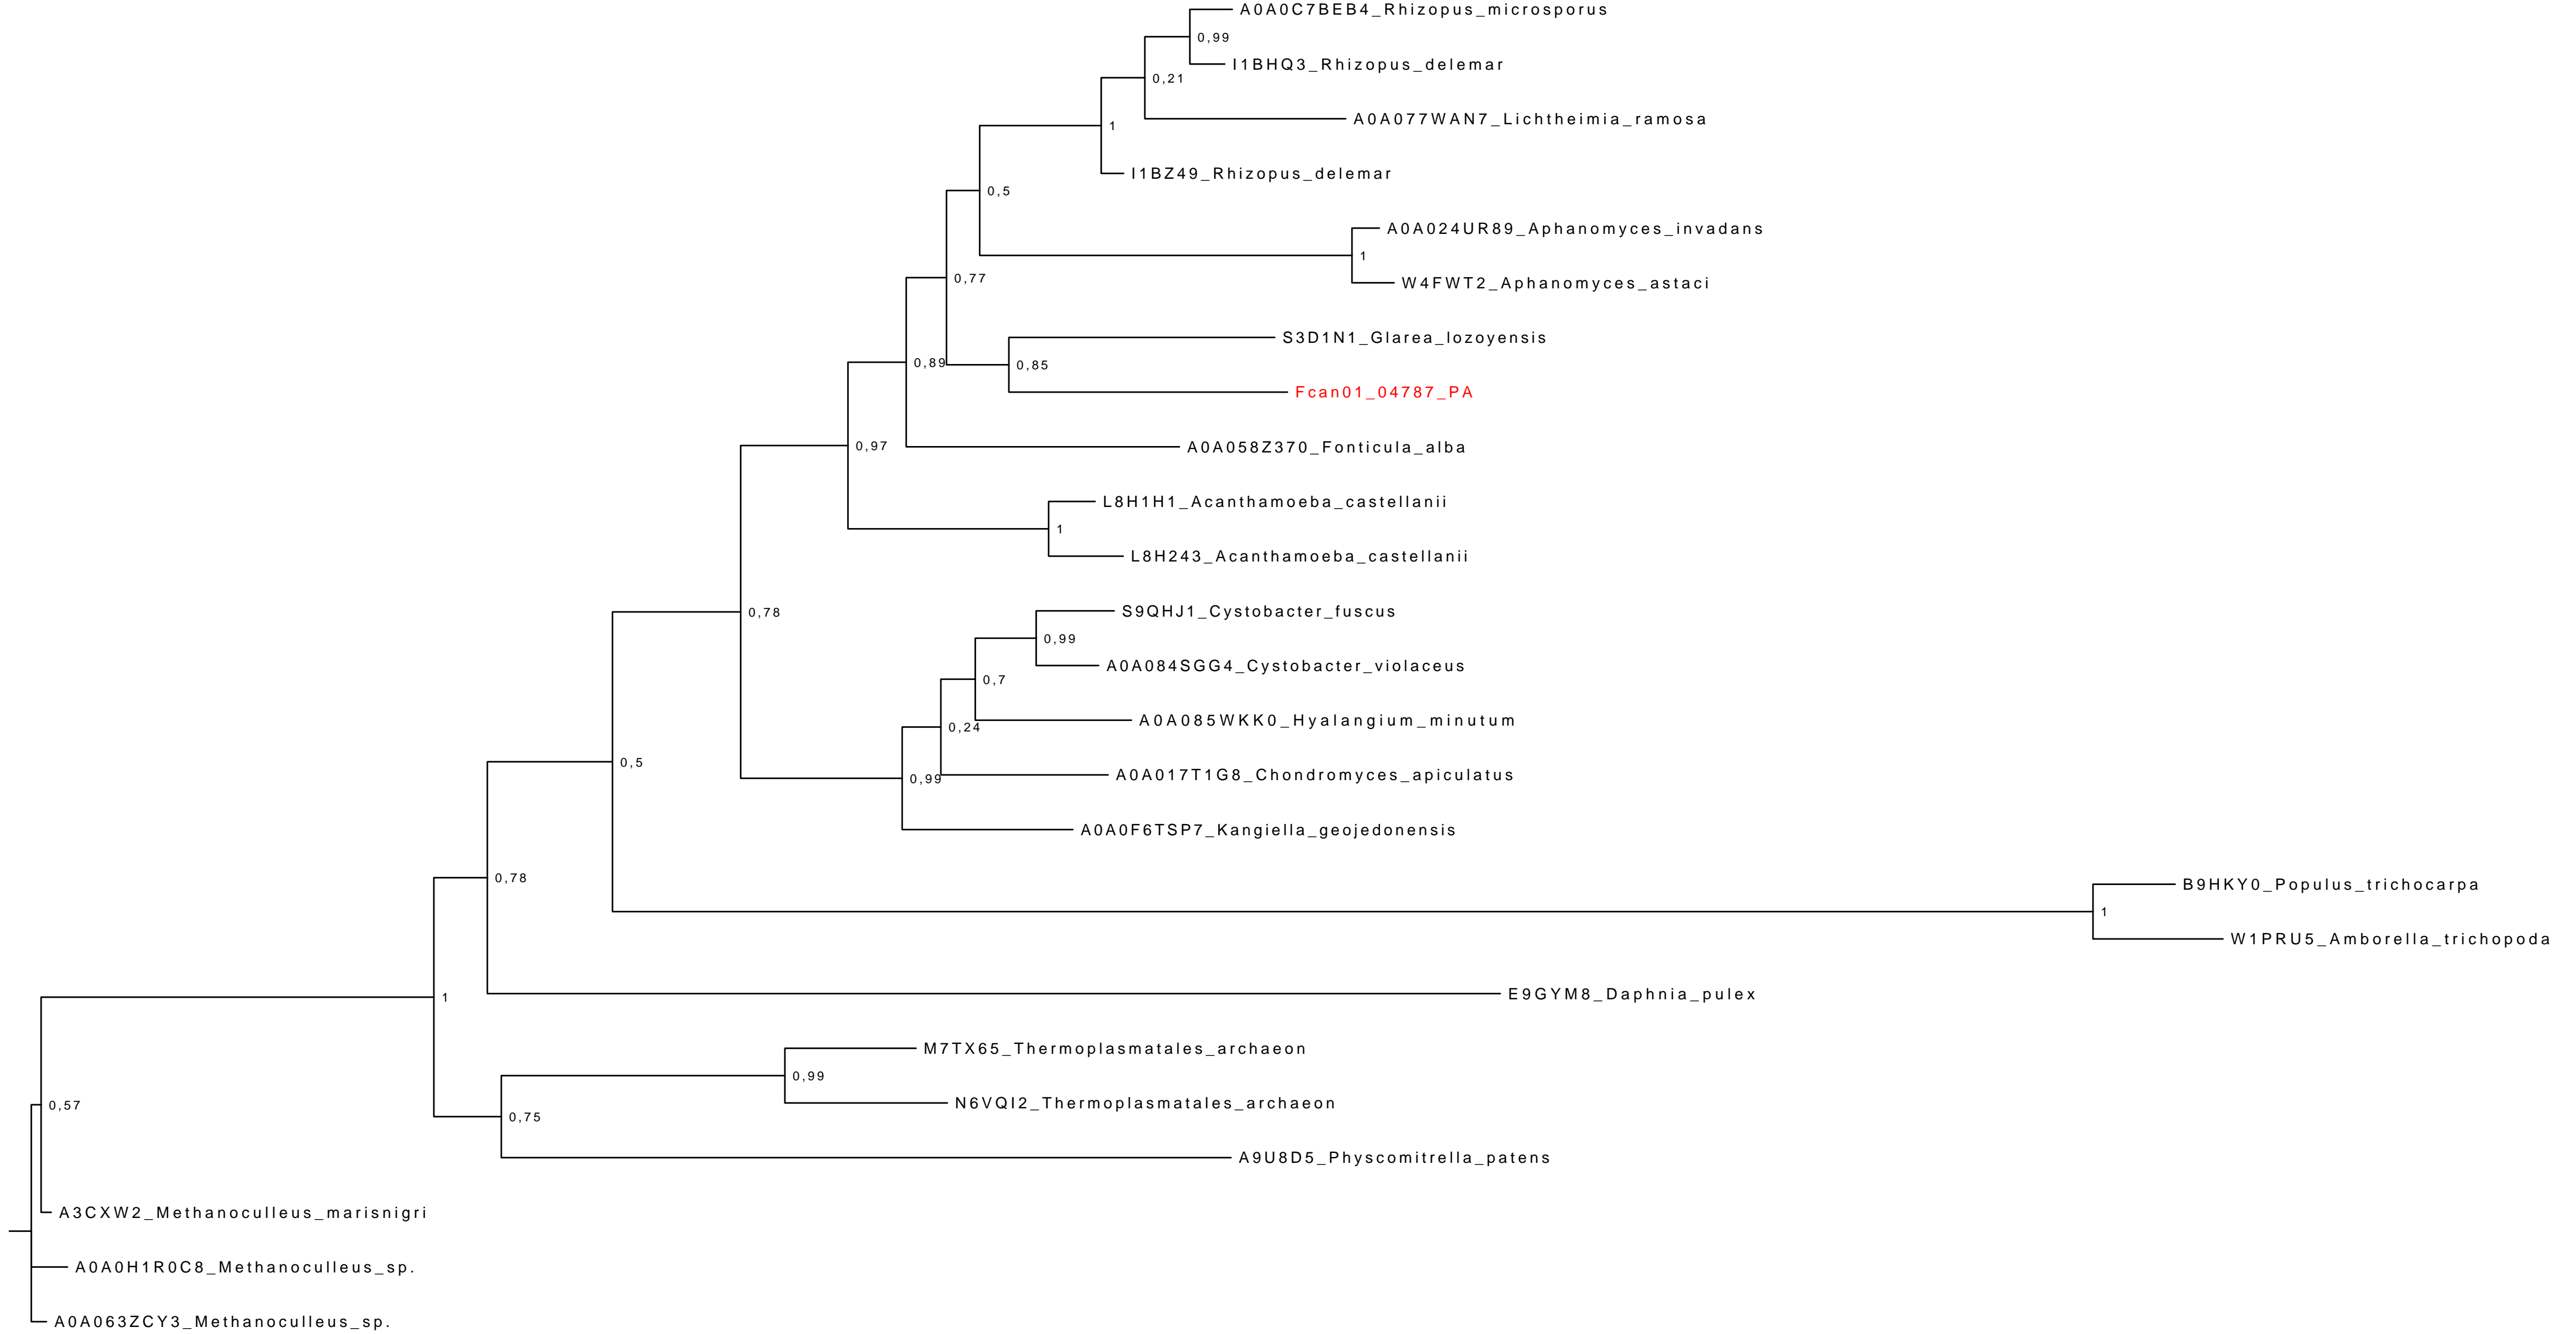

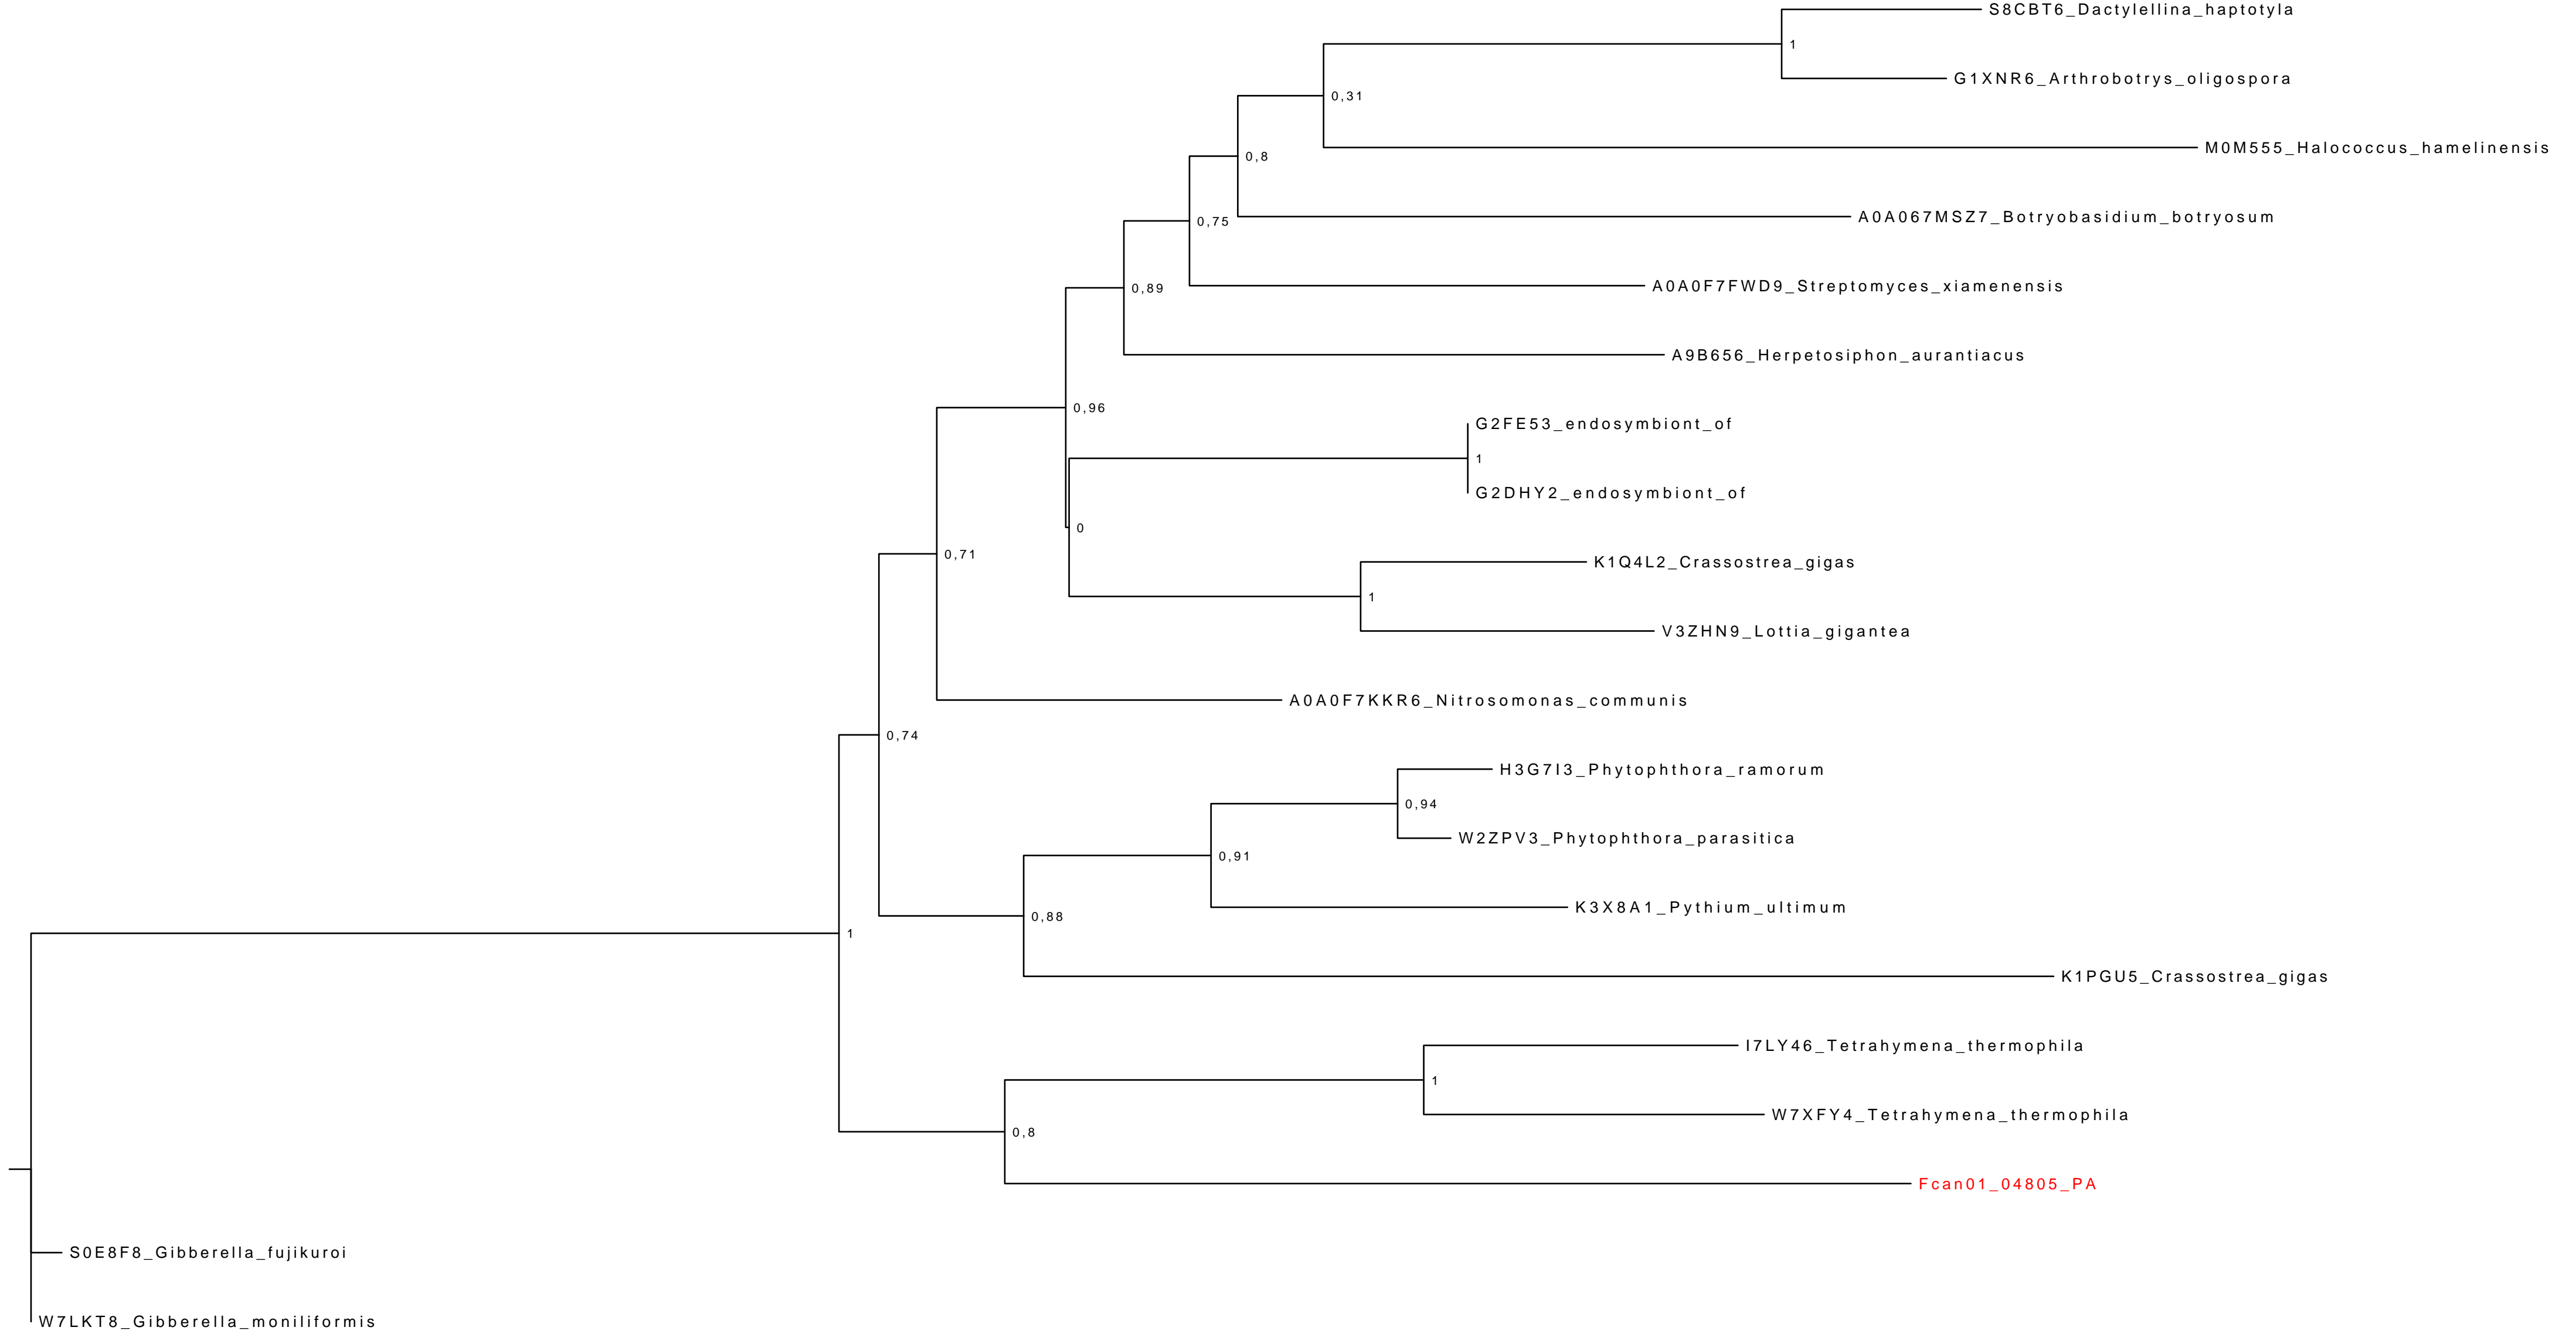

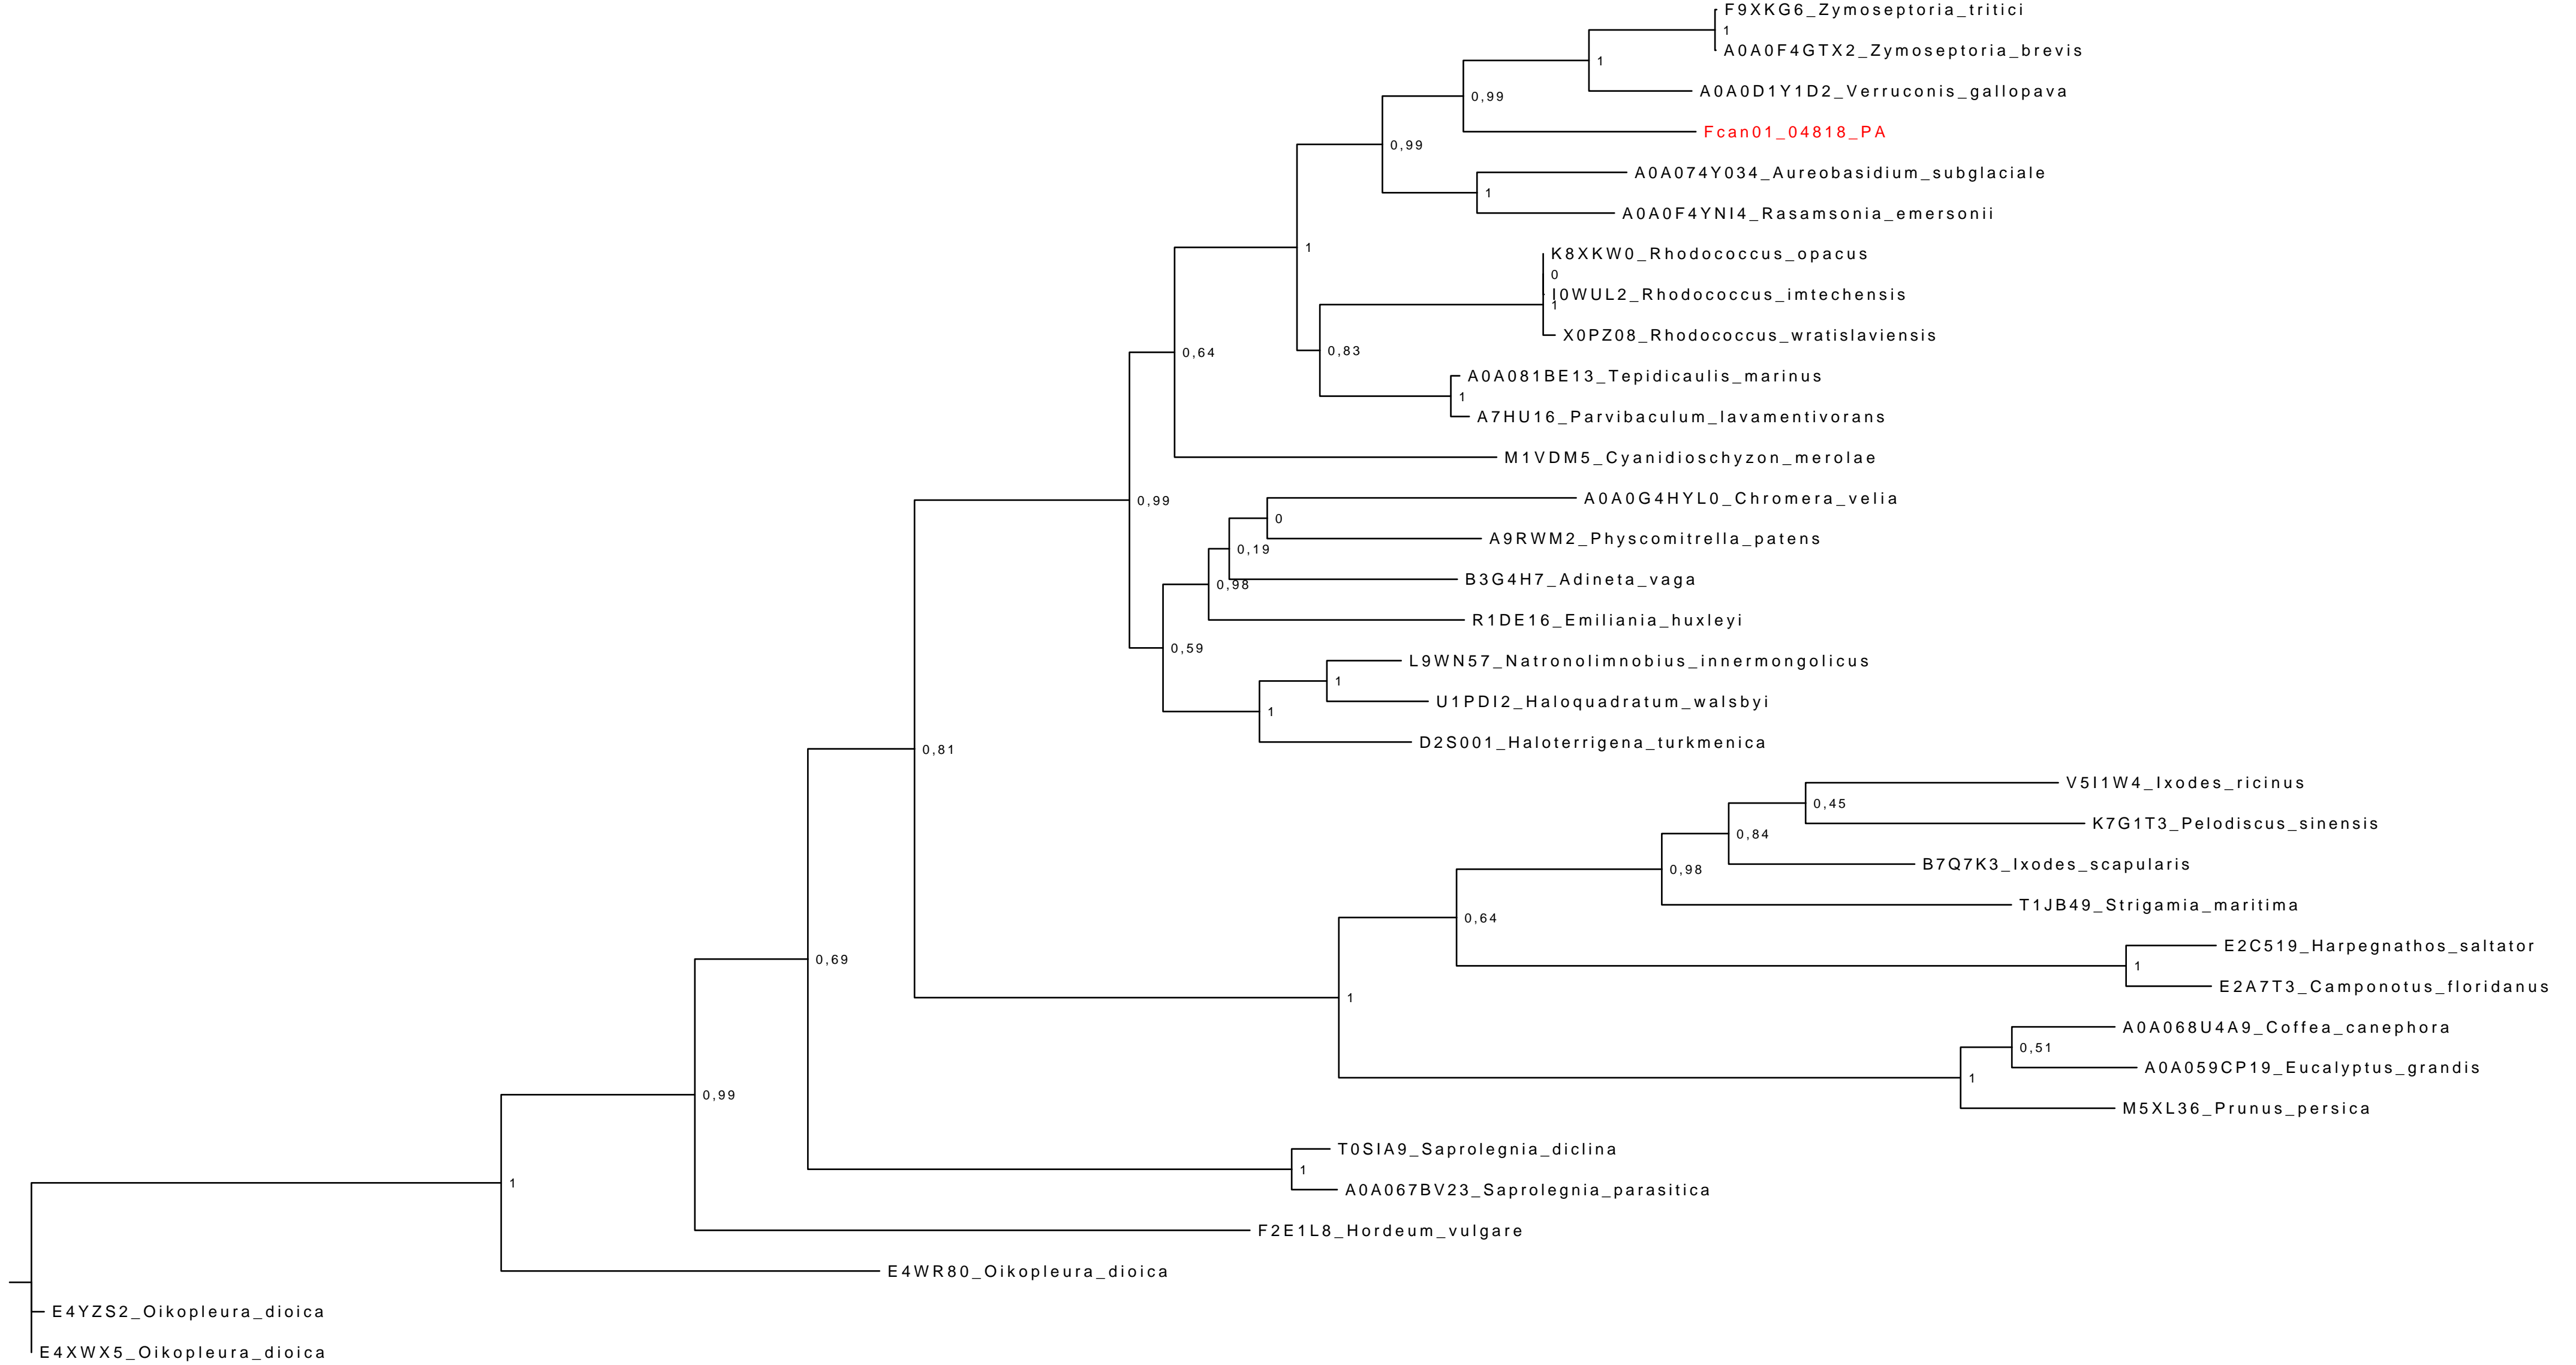

0.5



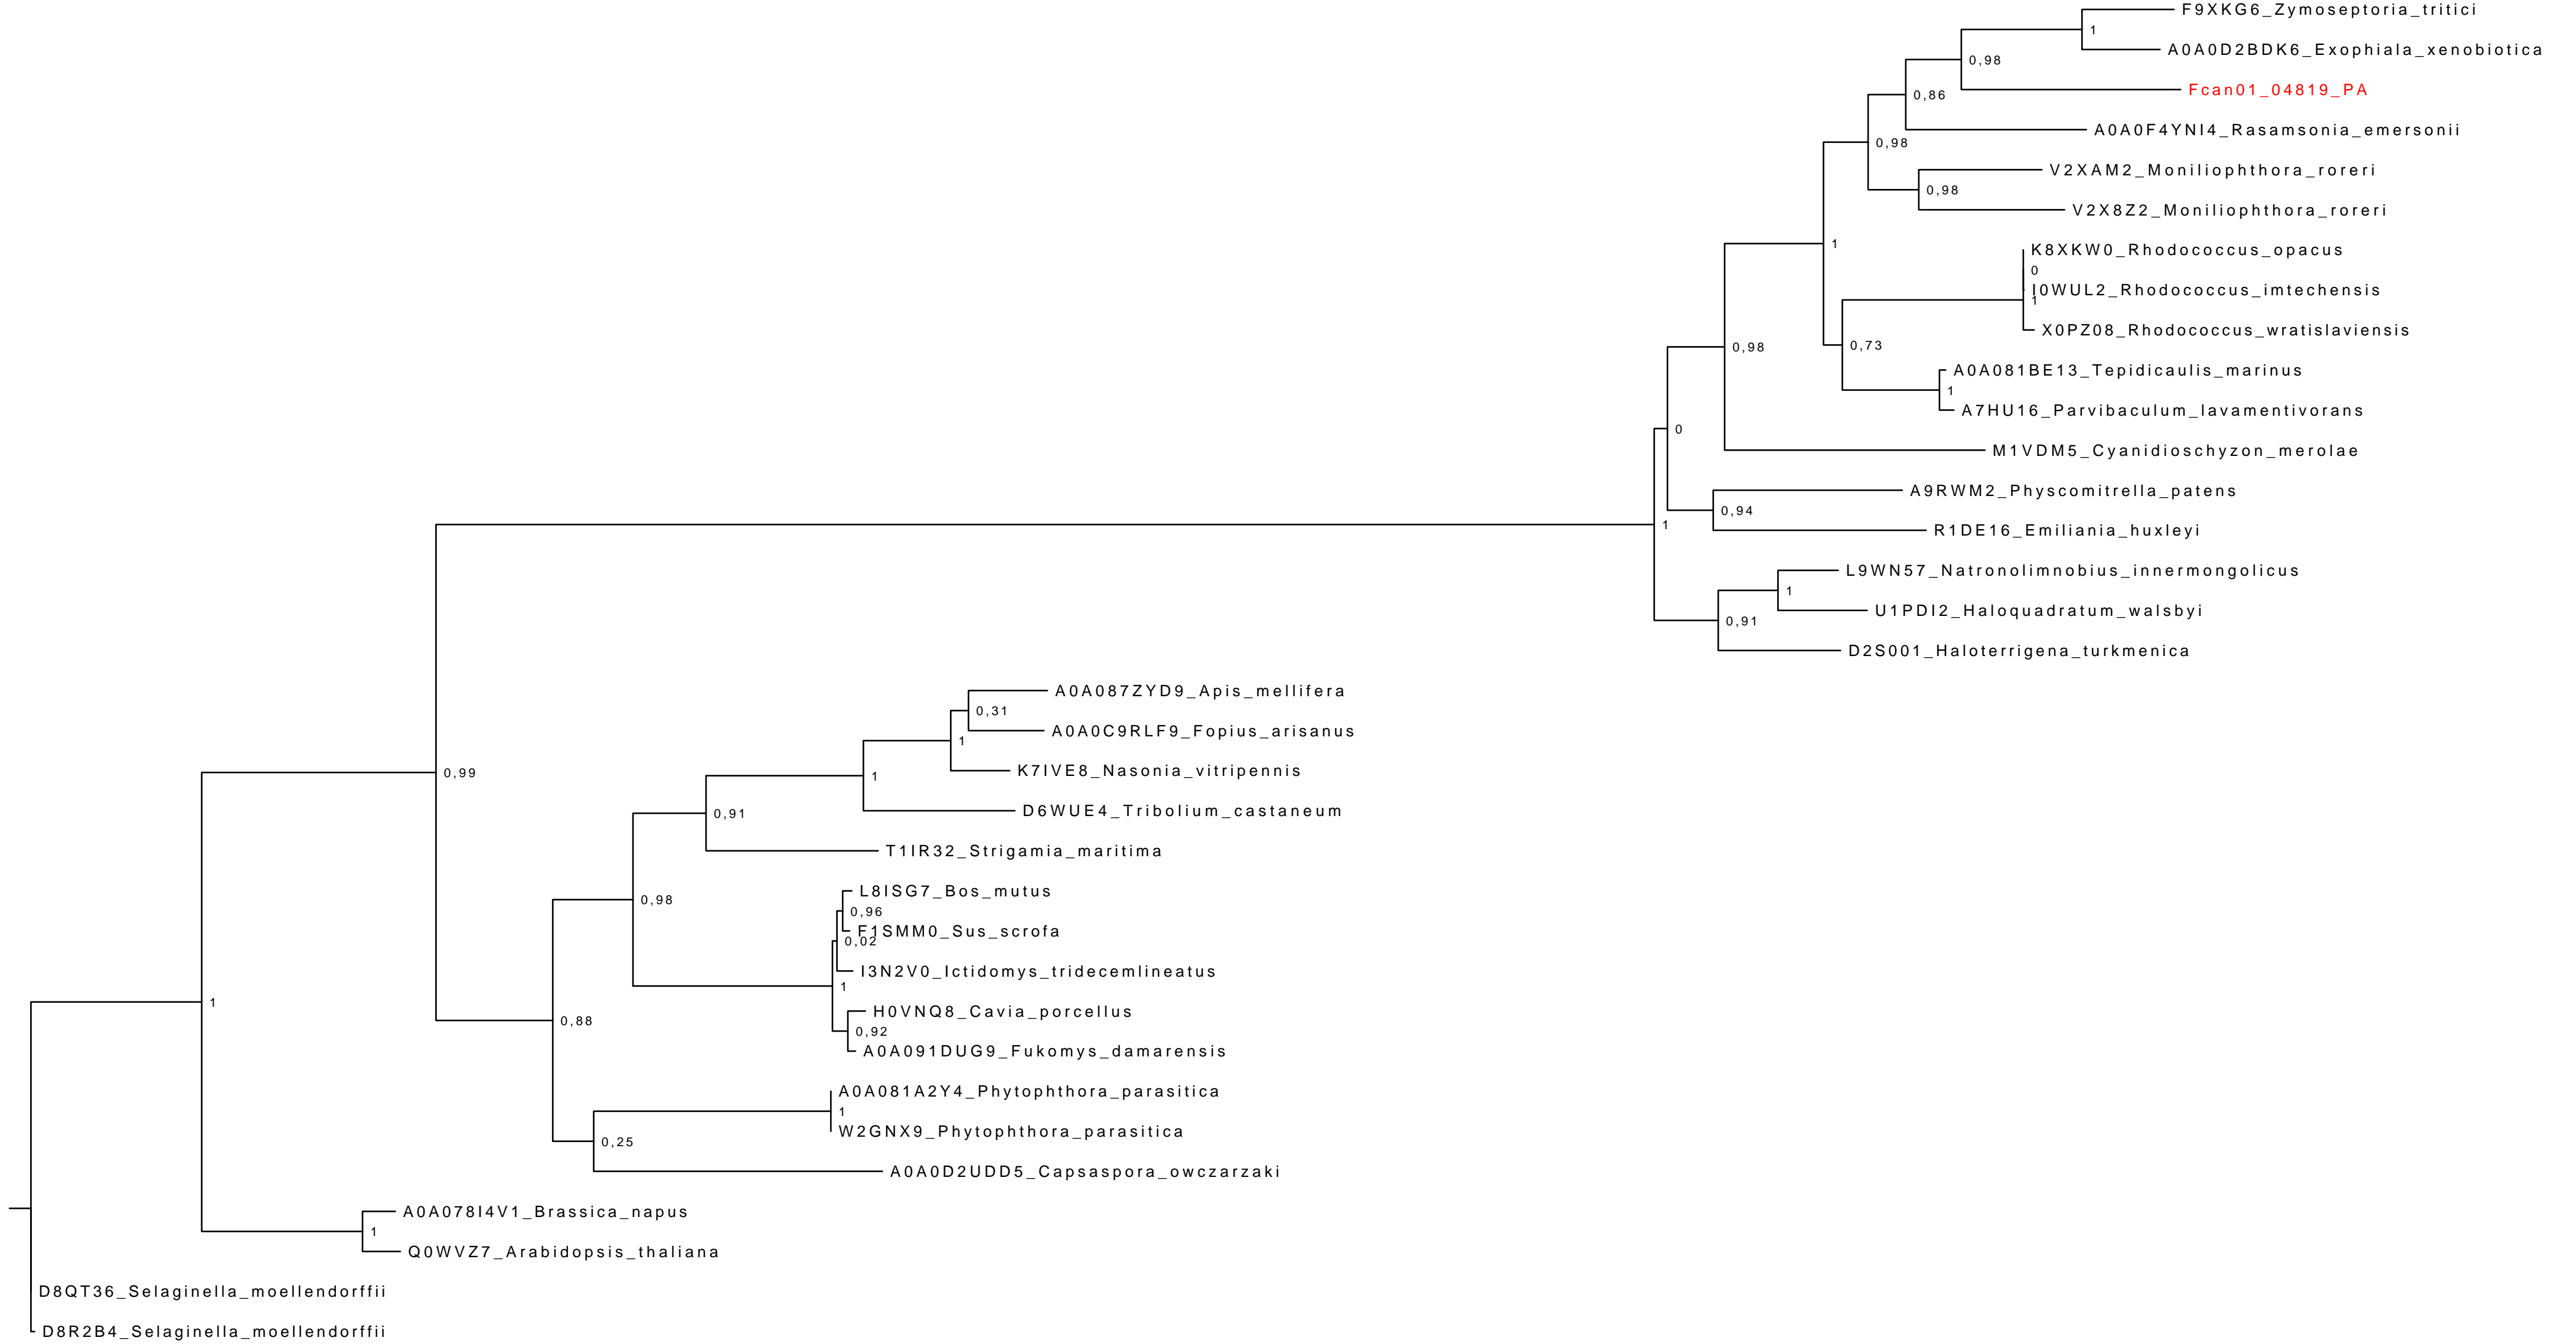

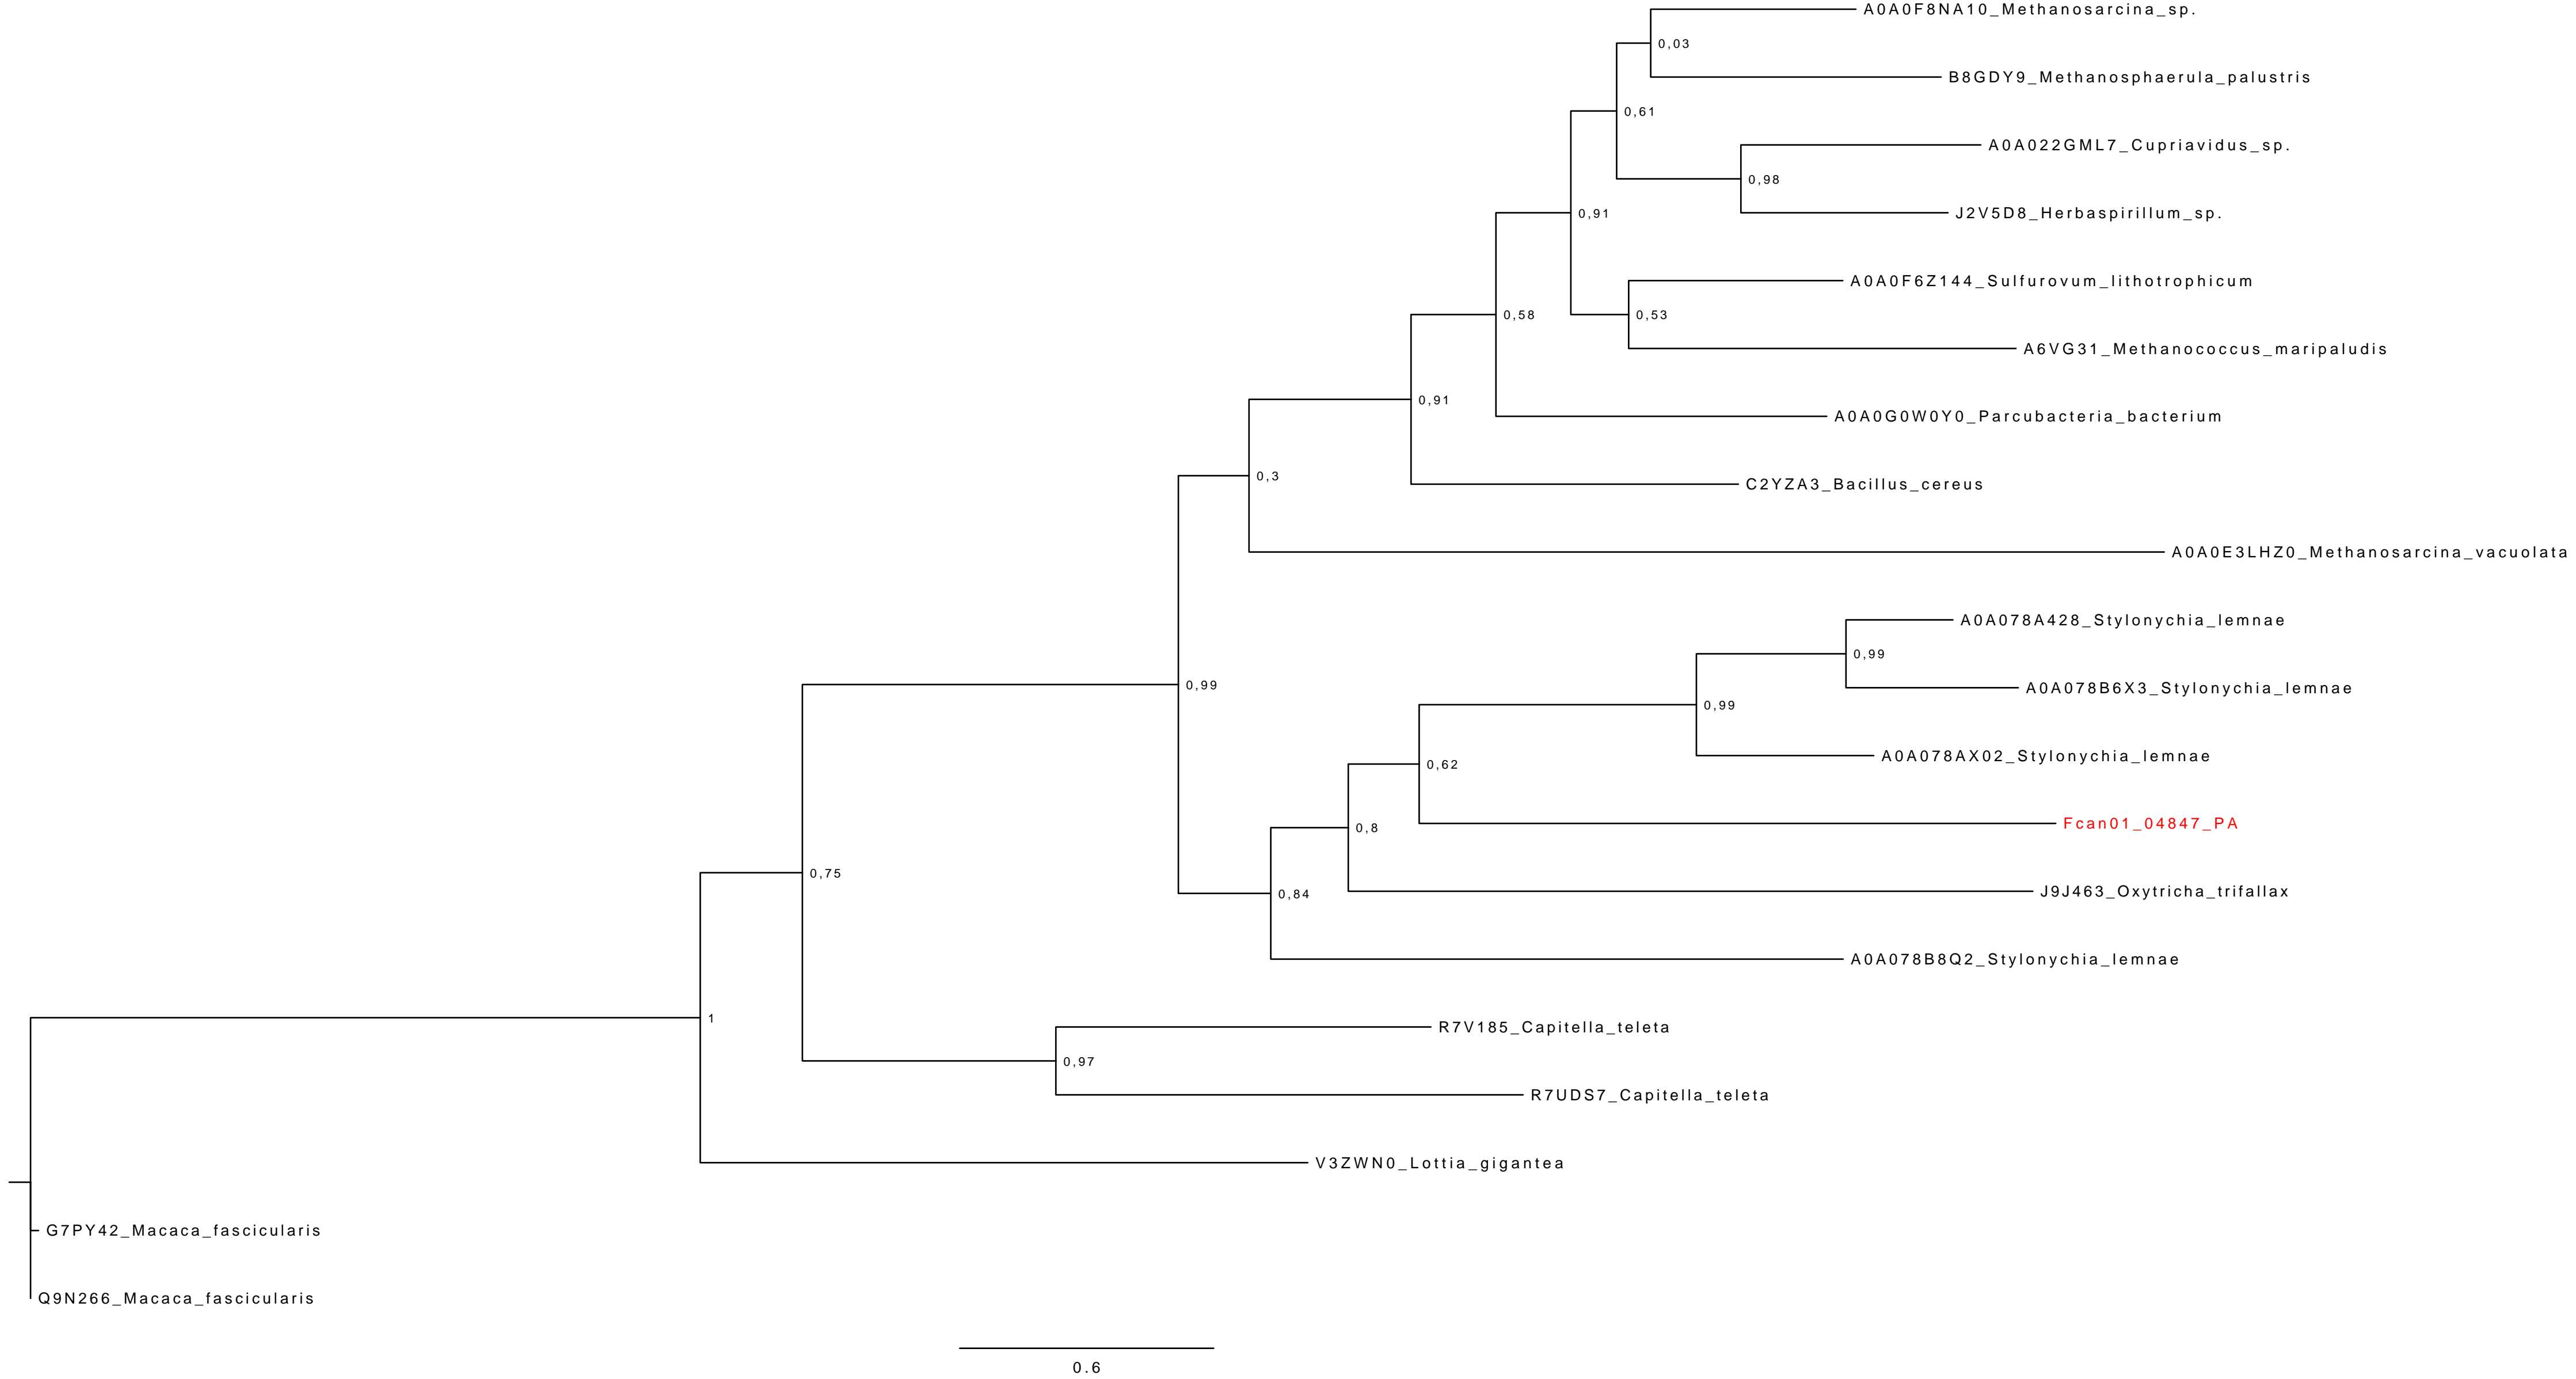

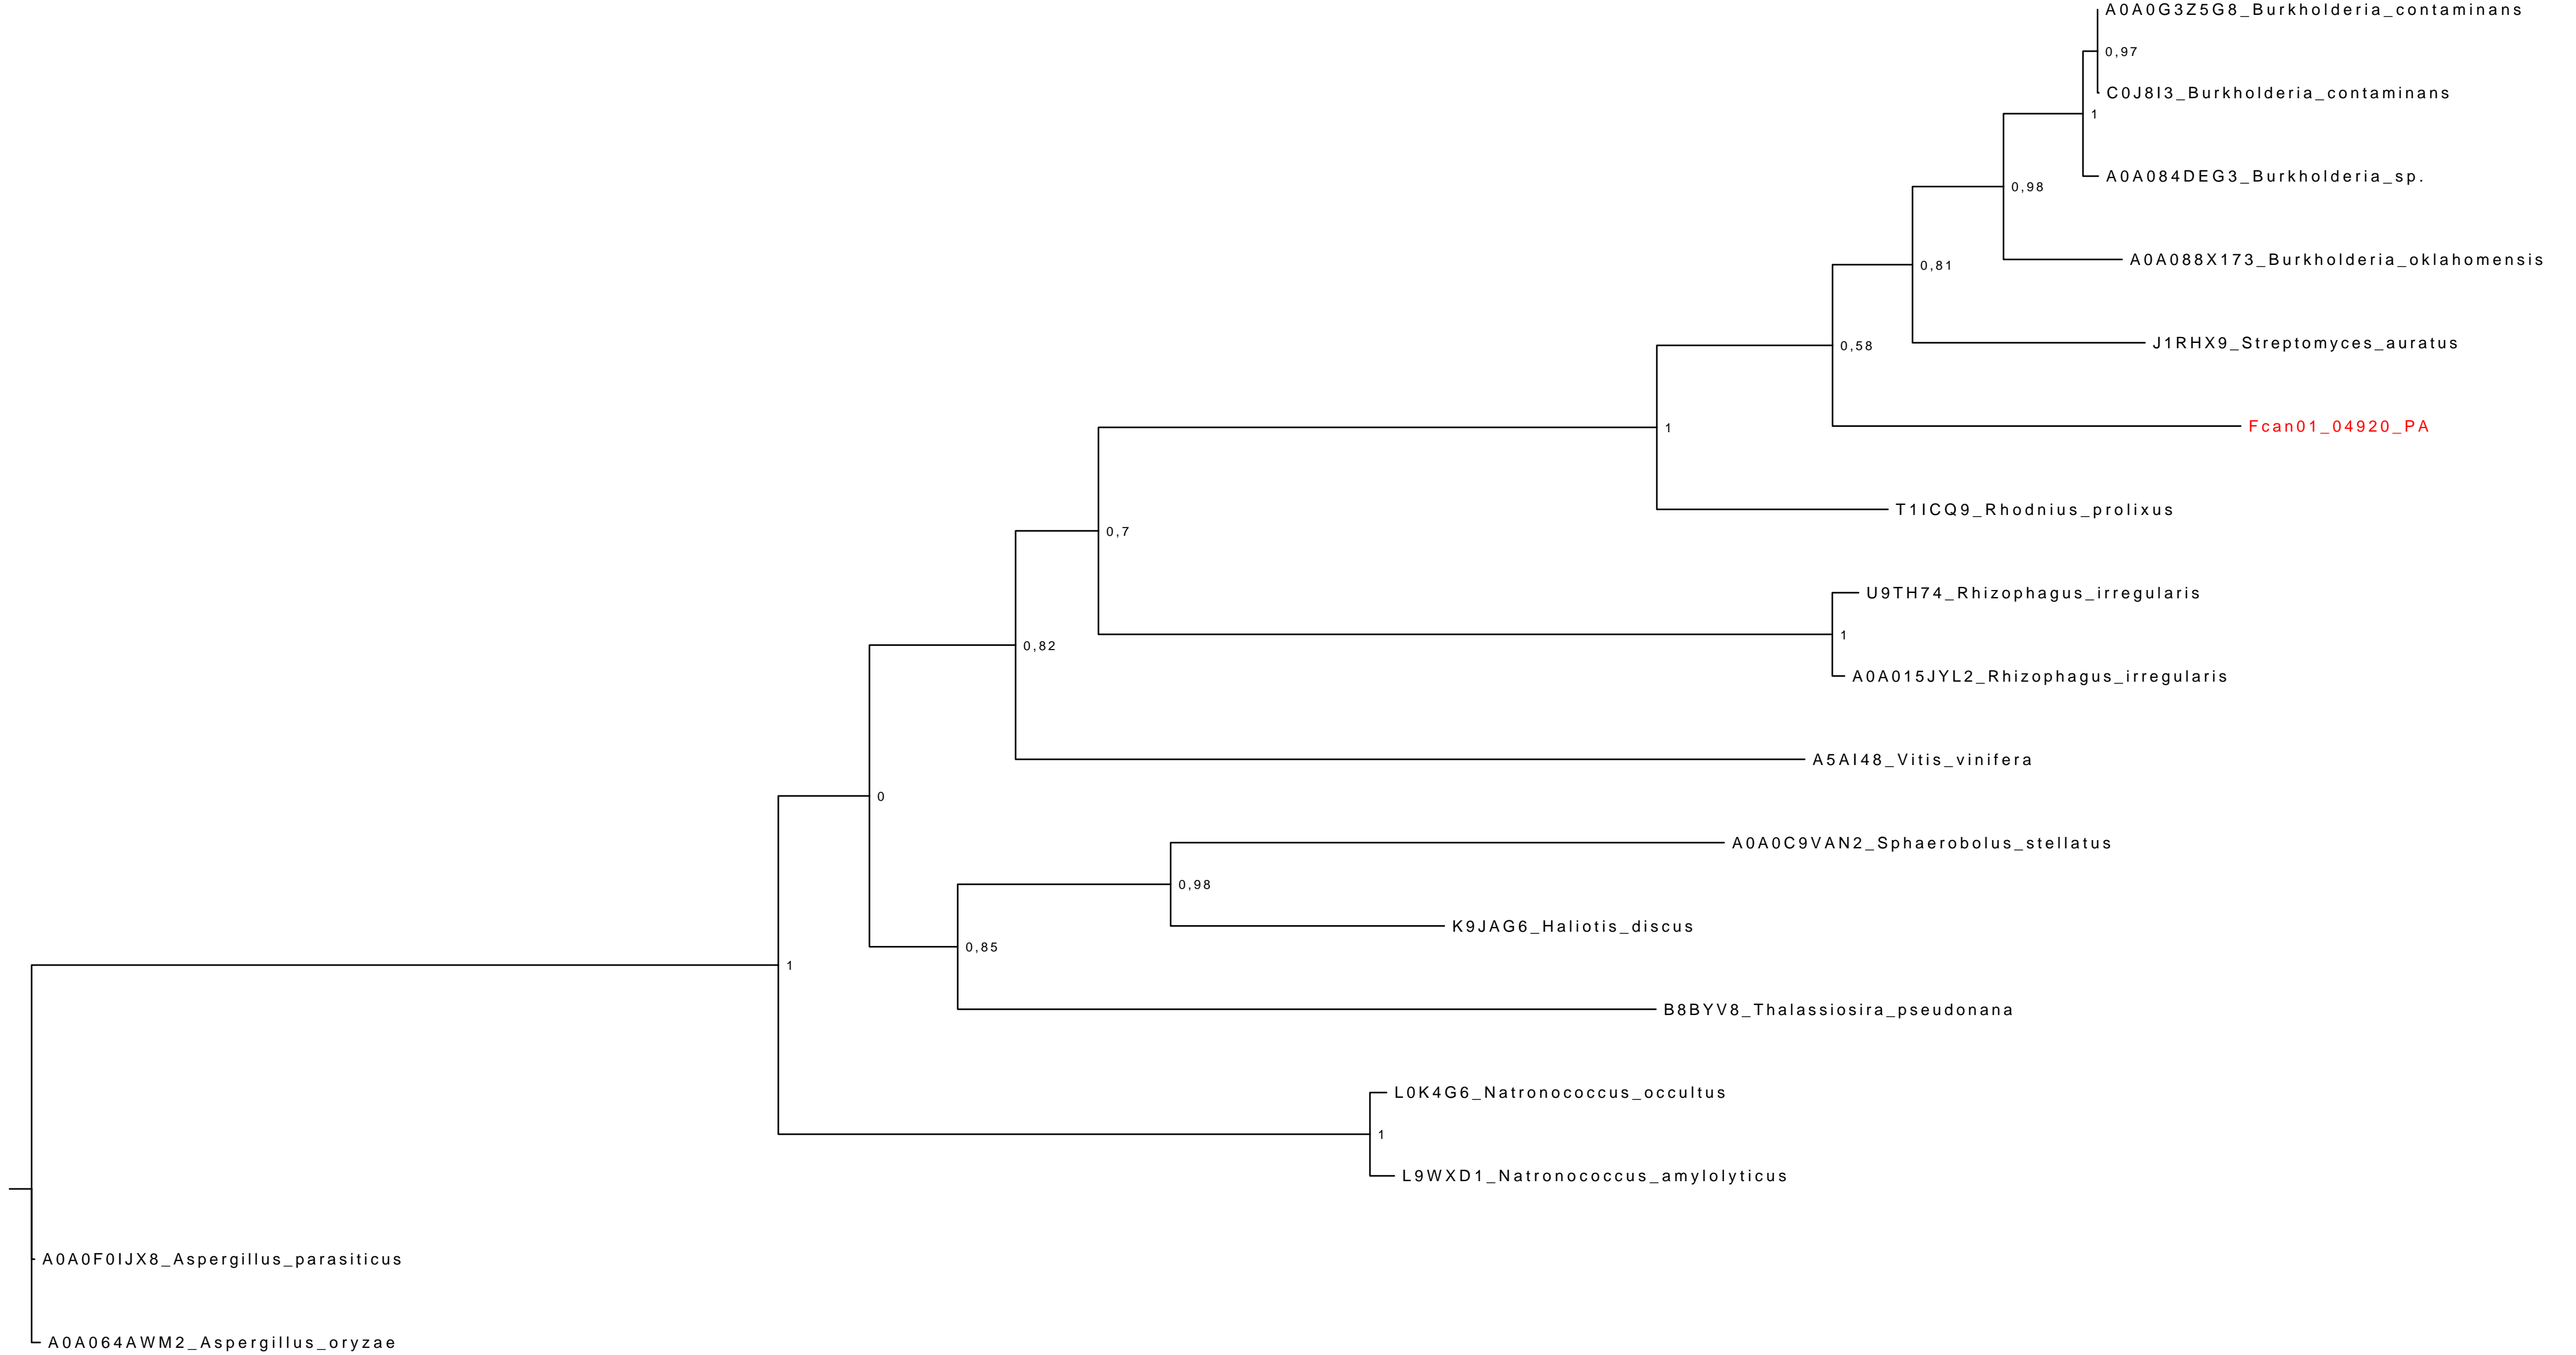

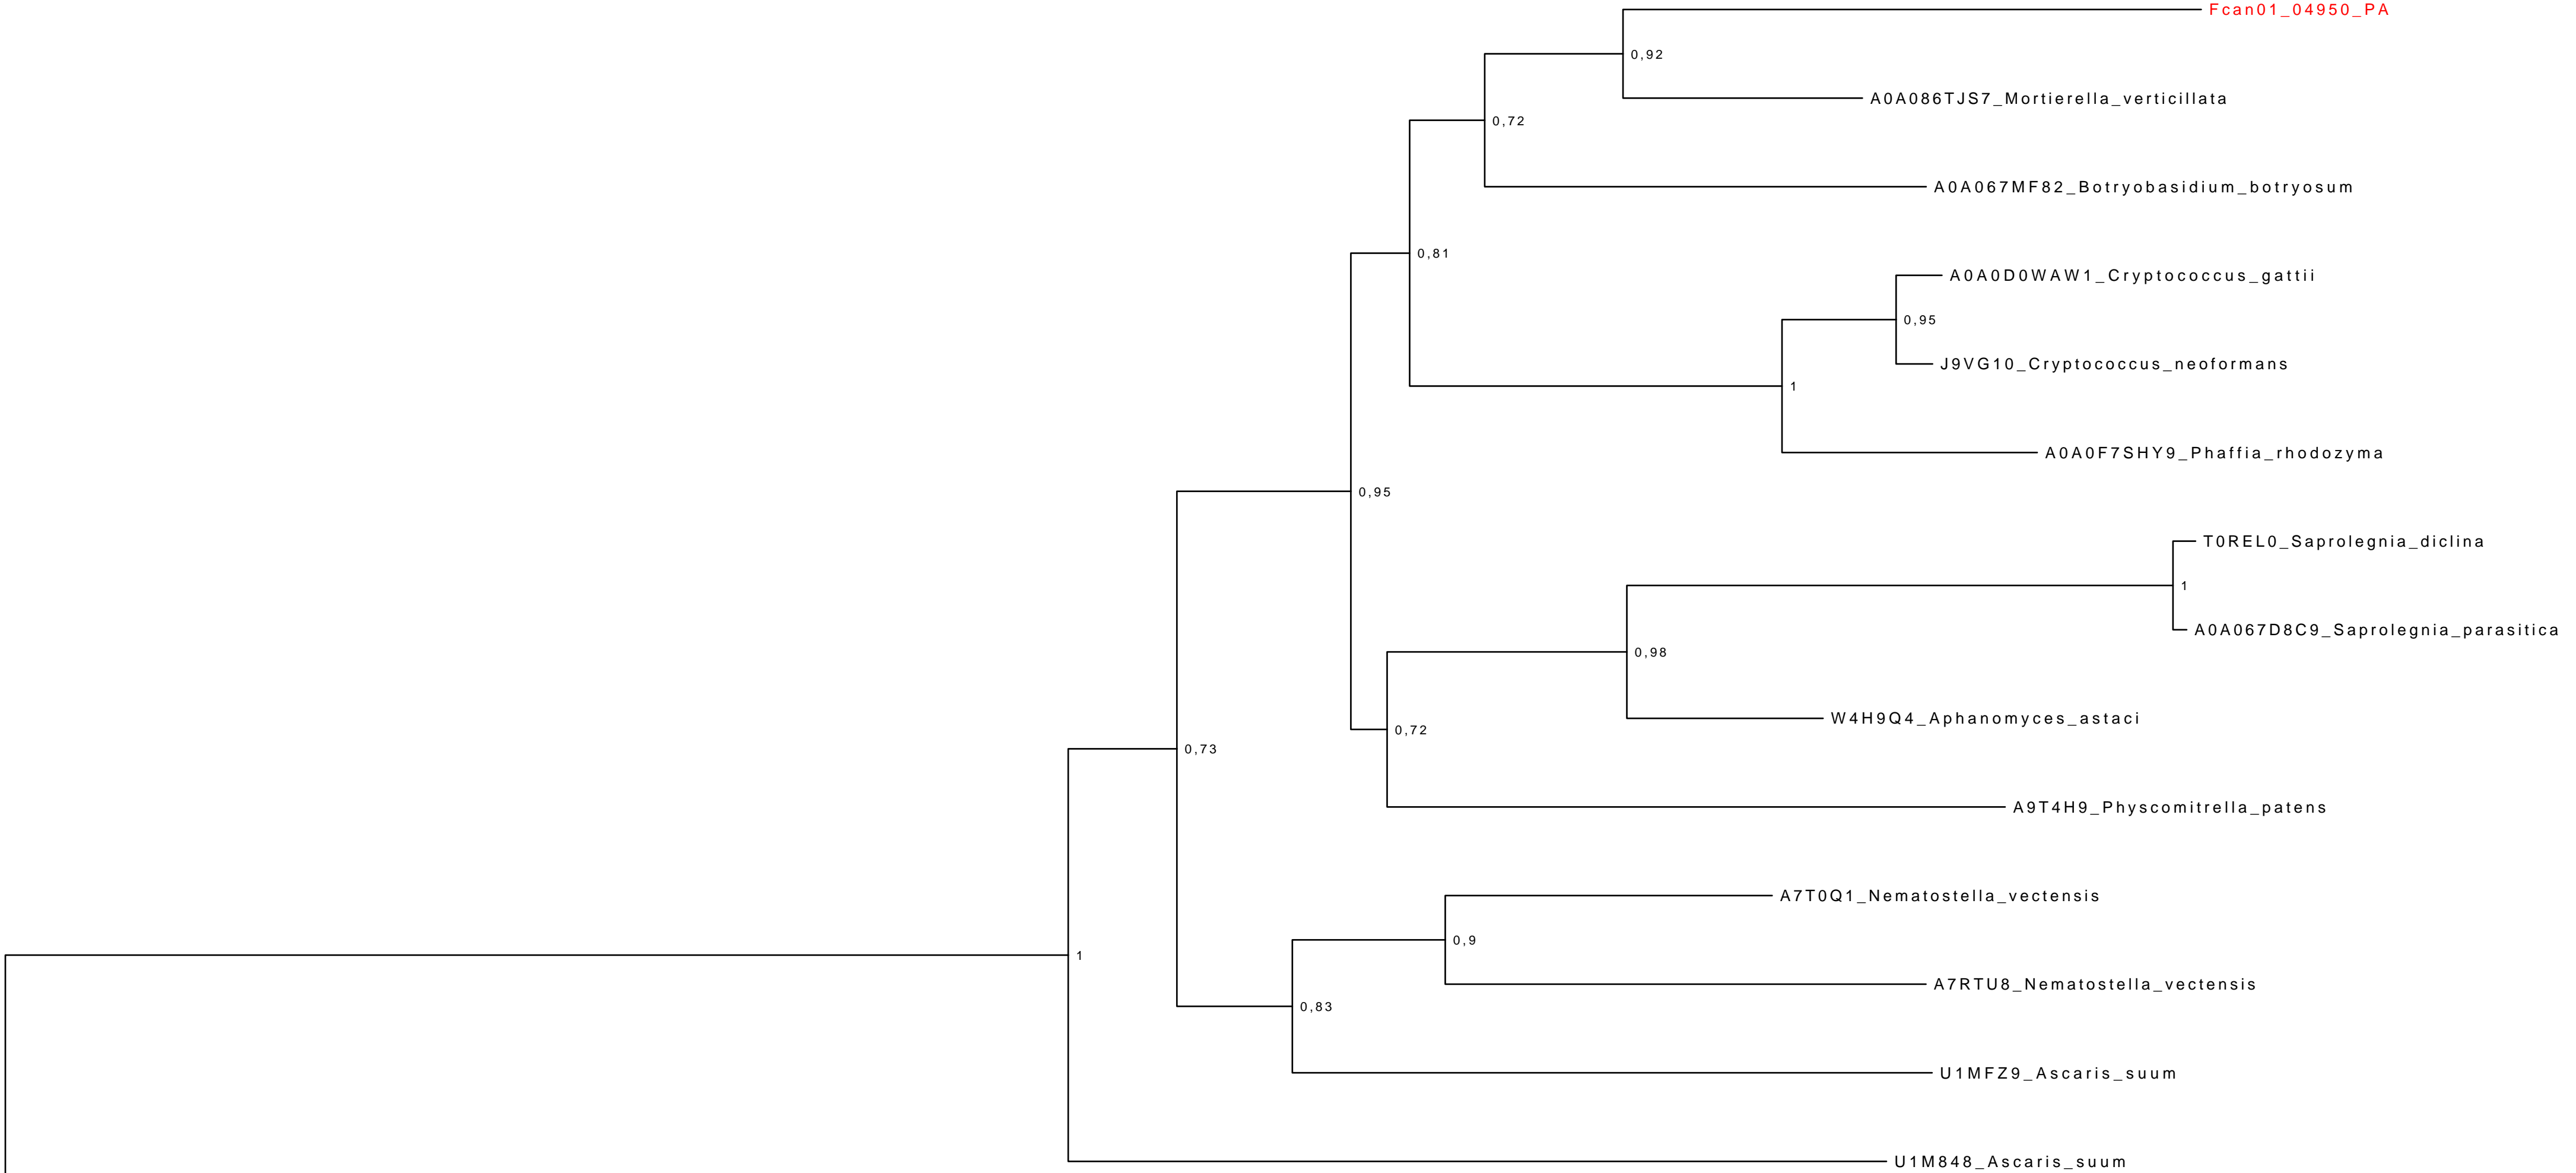

0.4

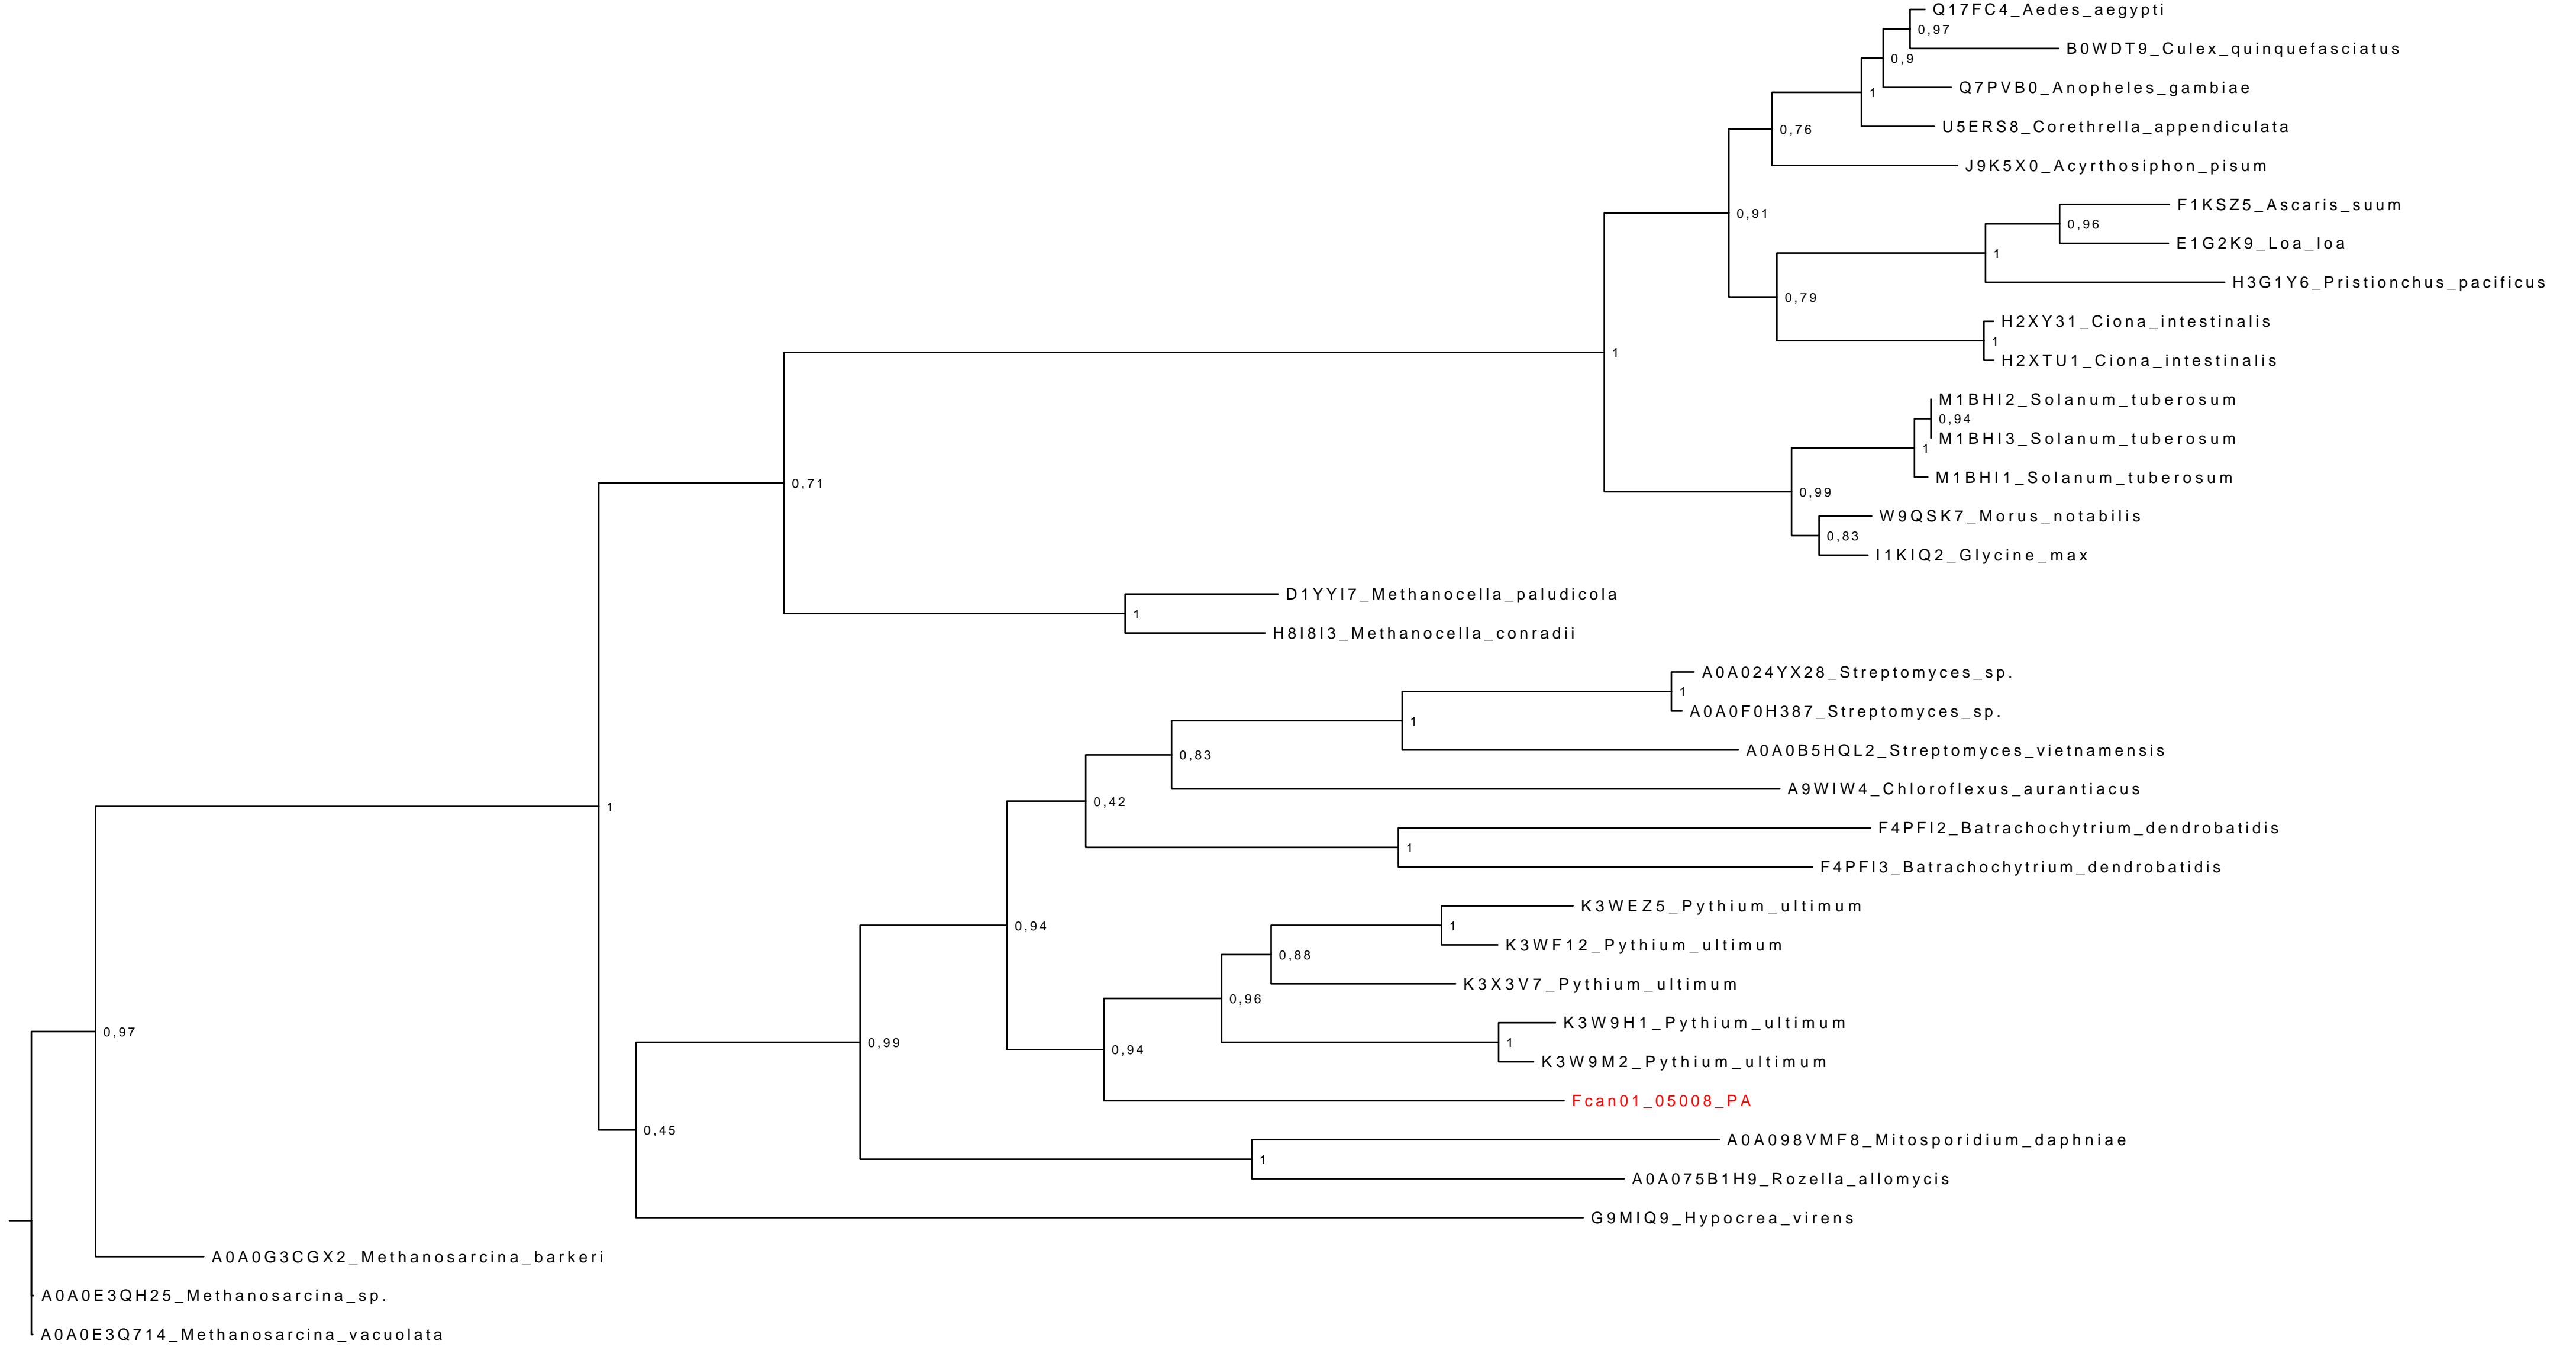

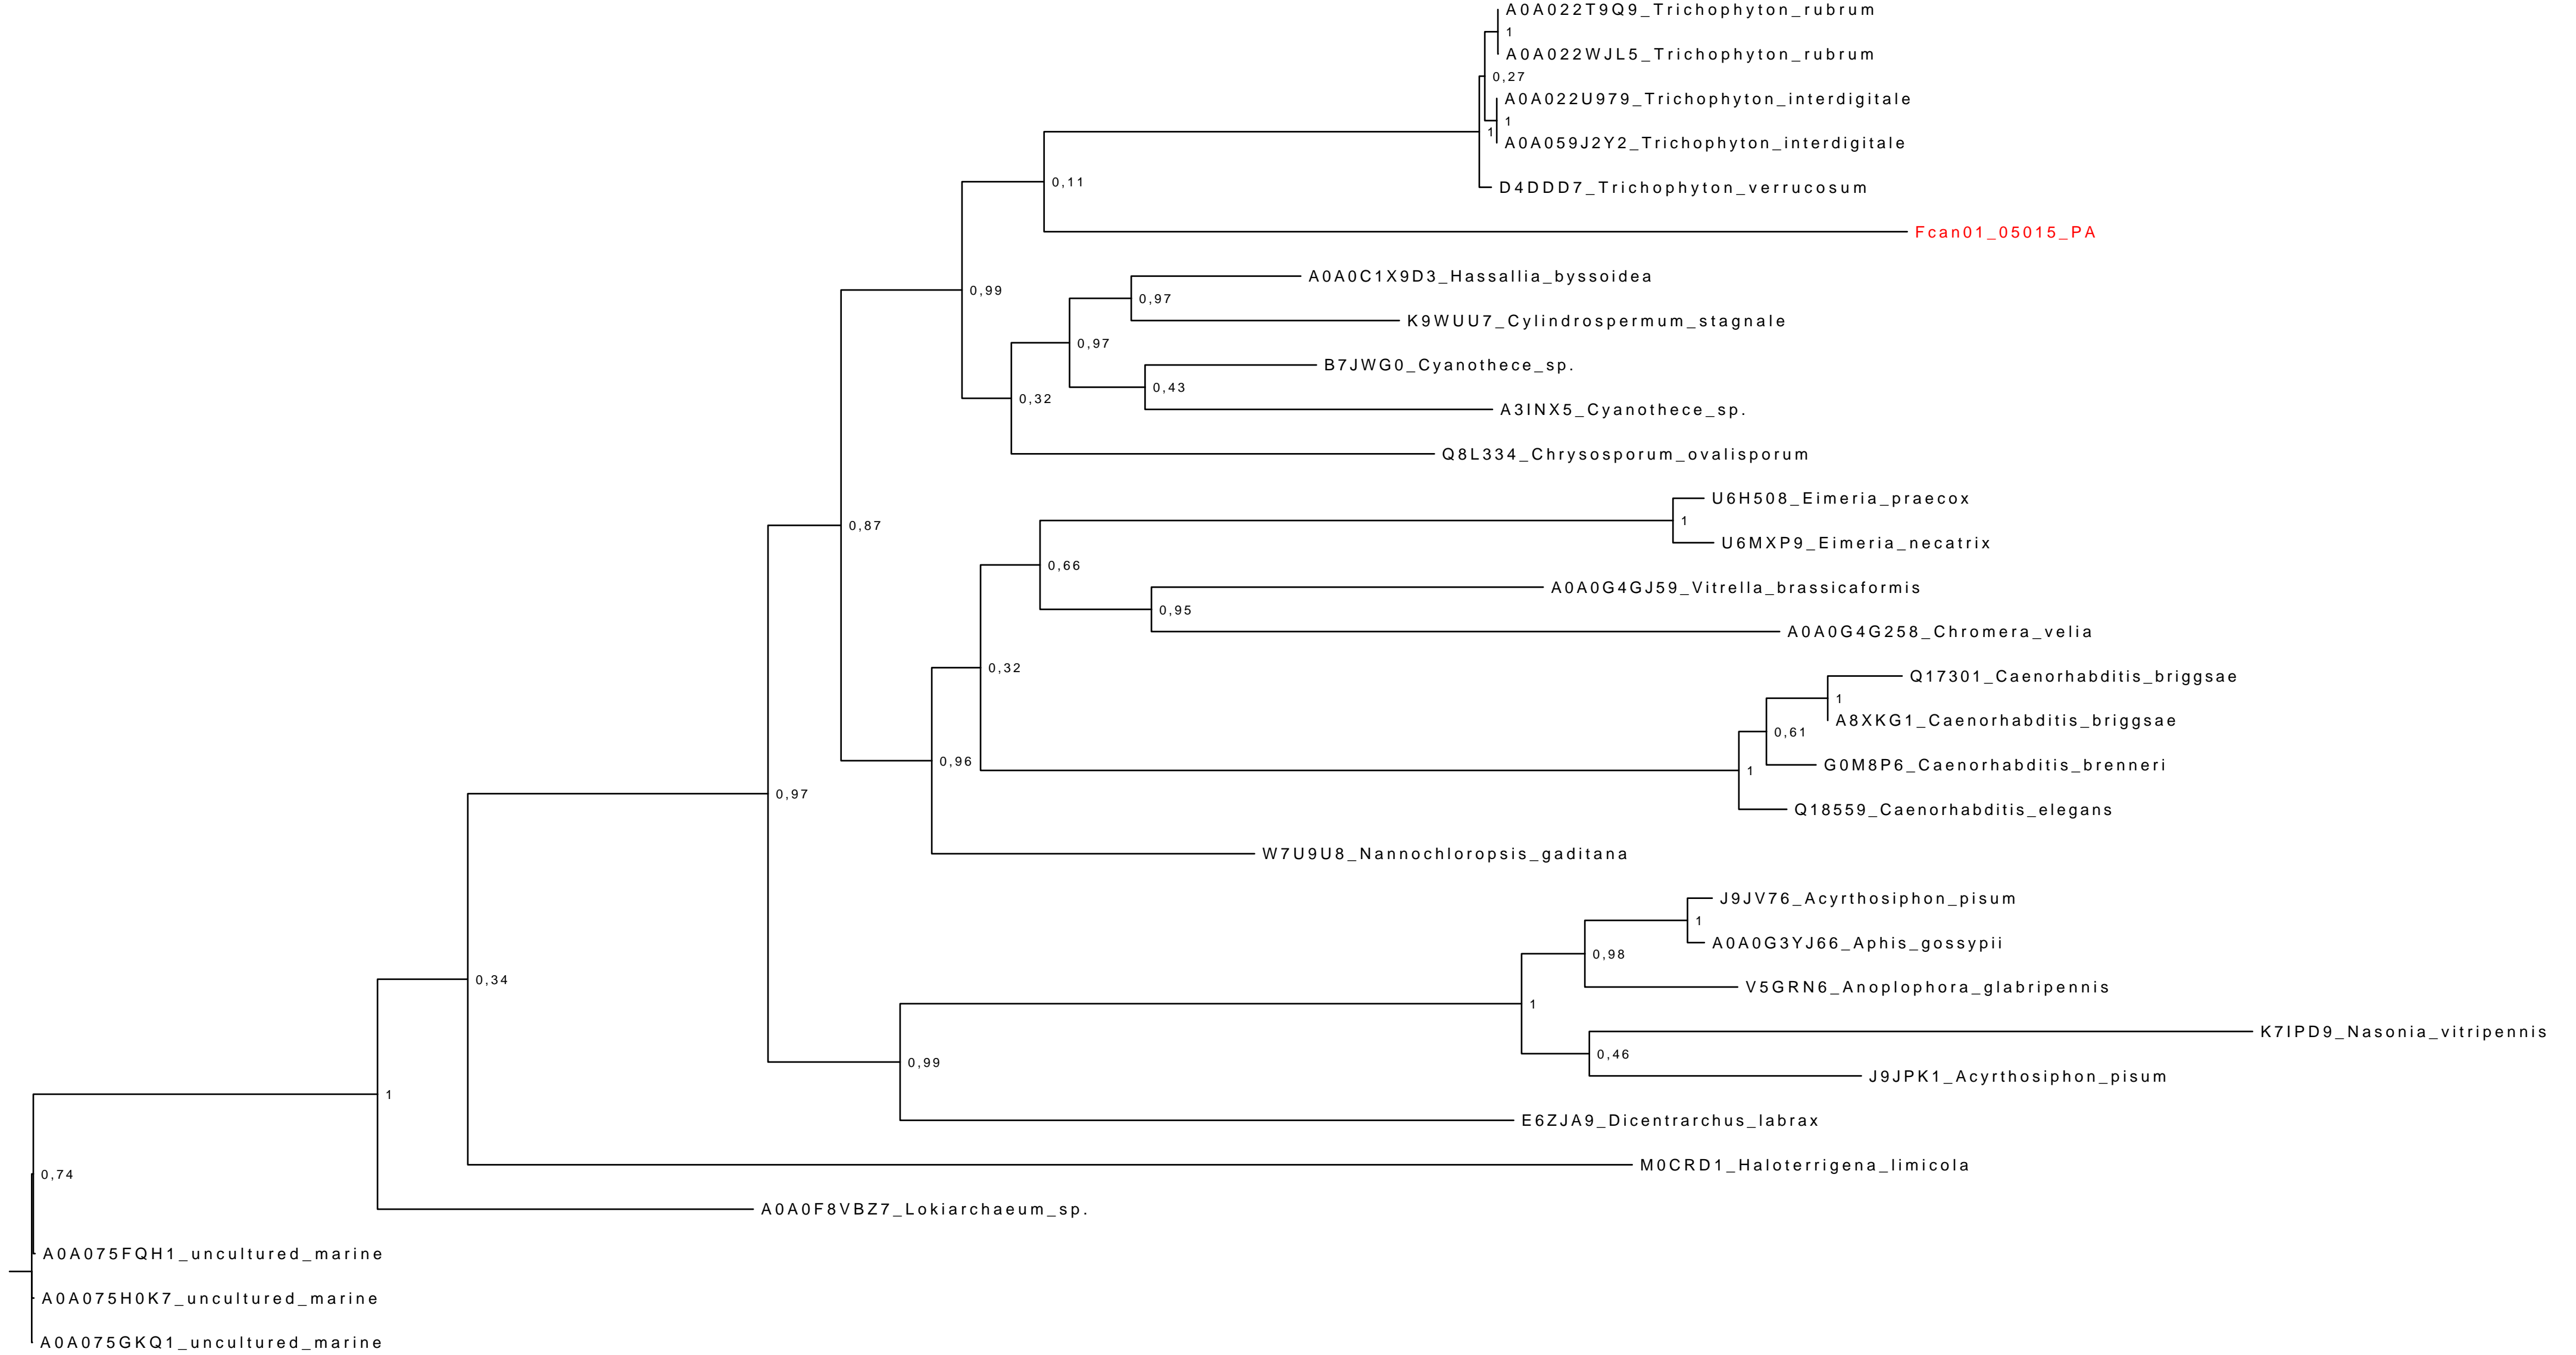

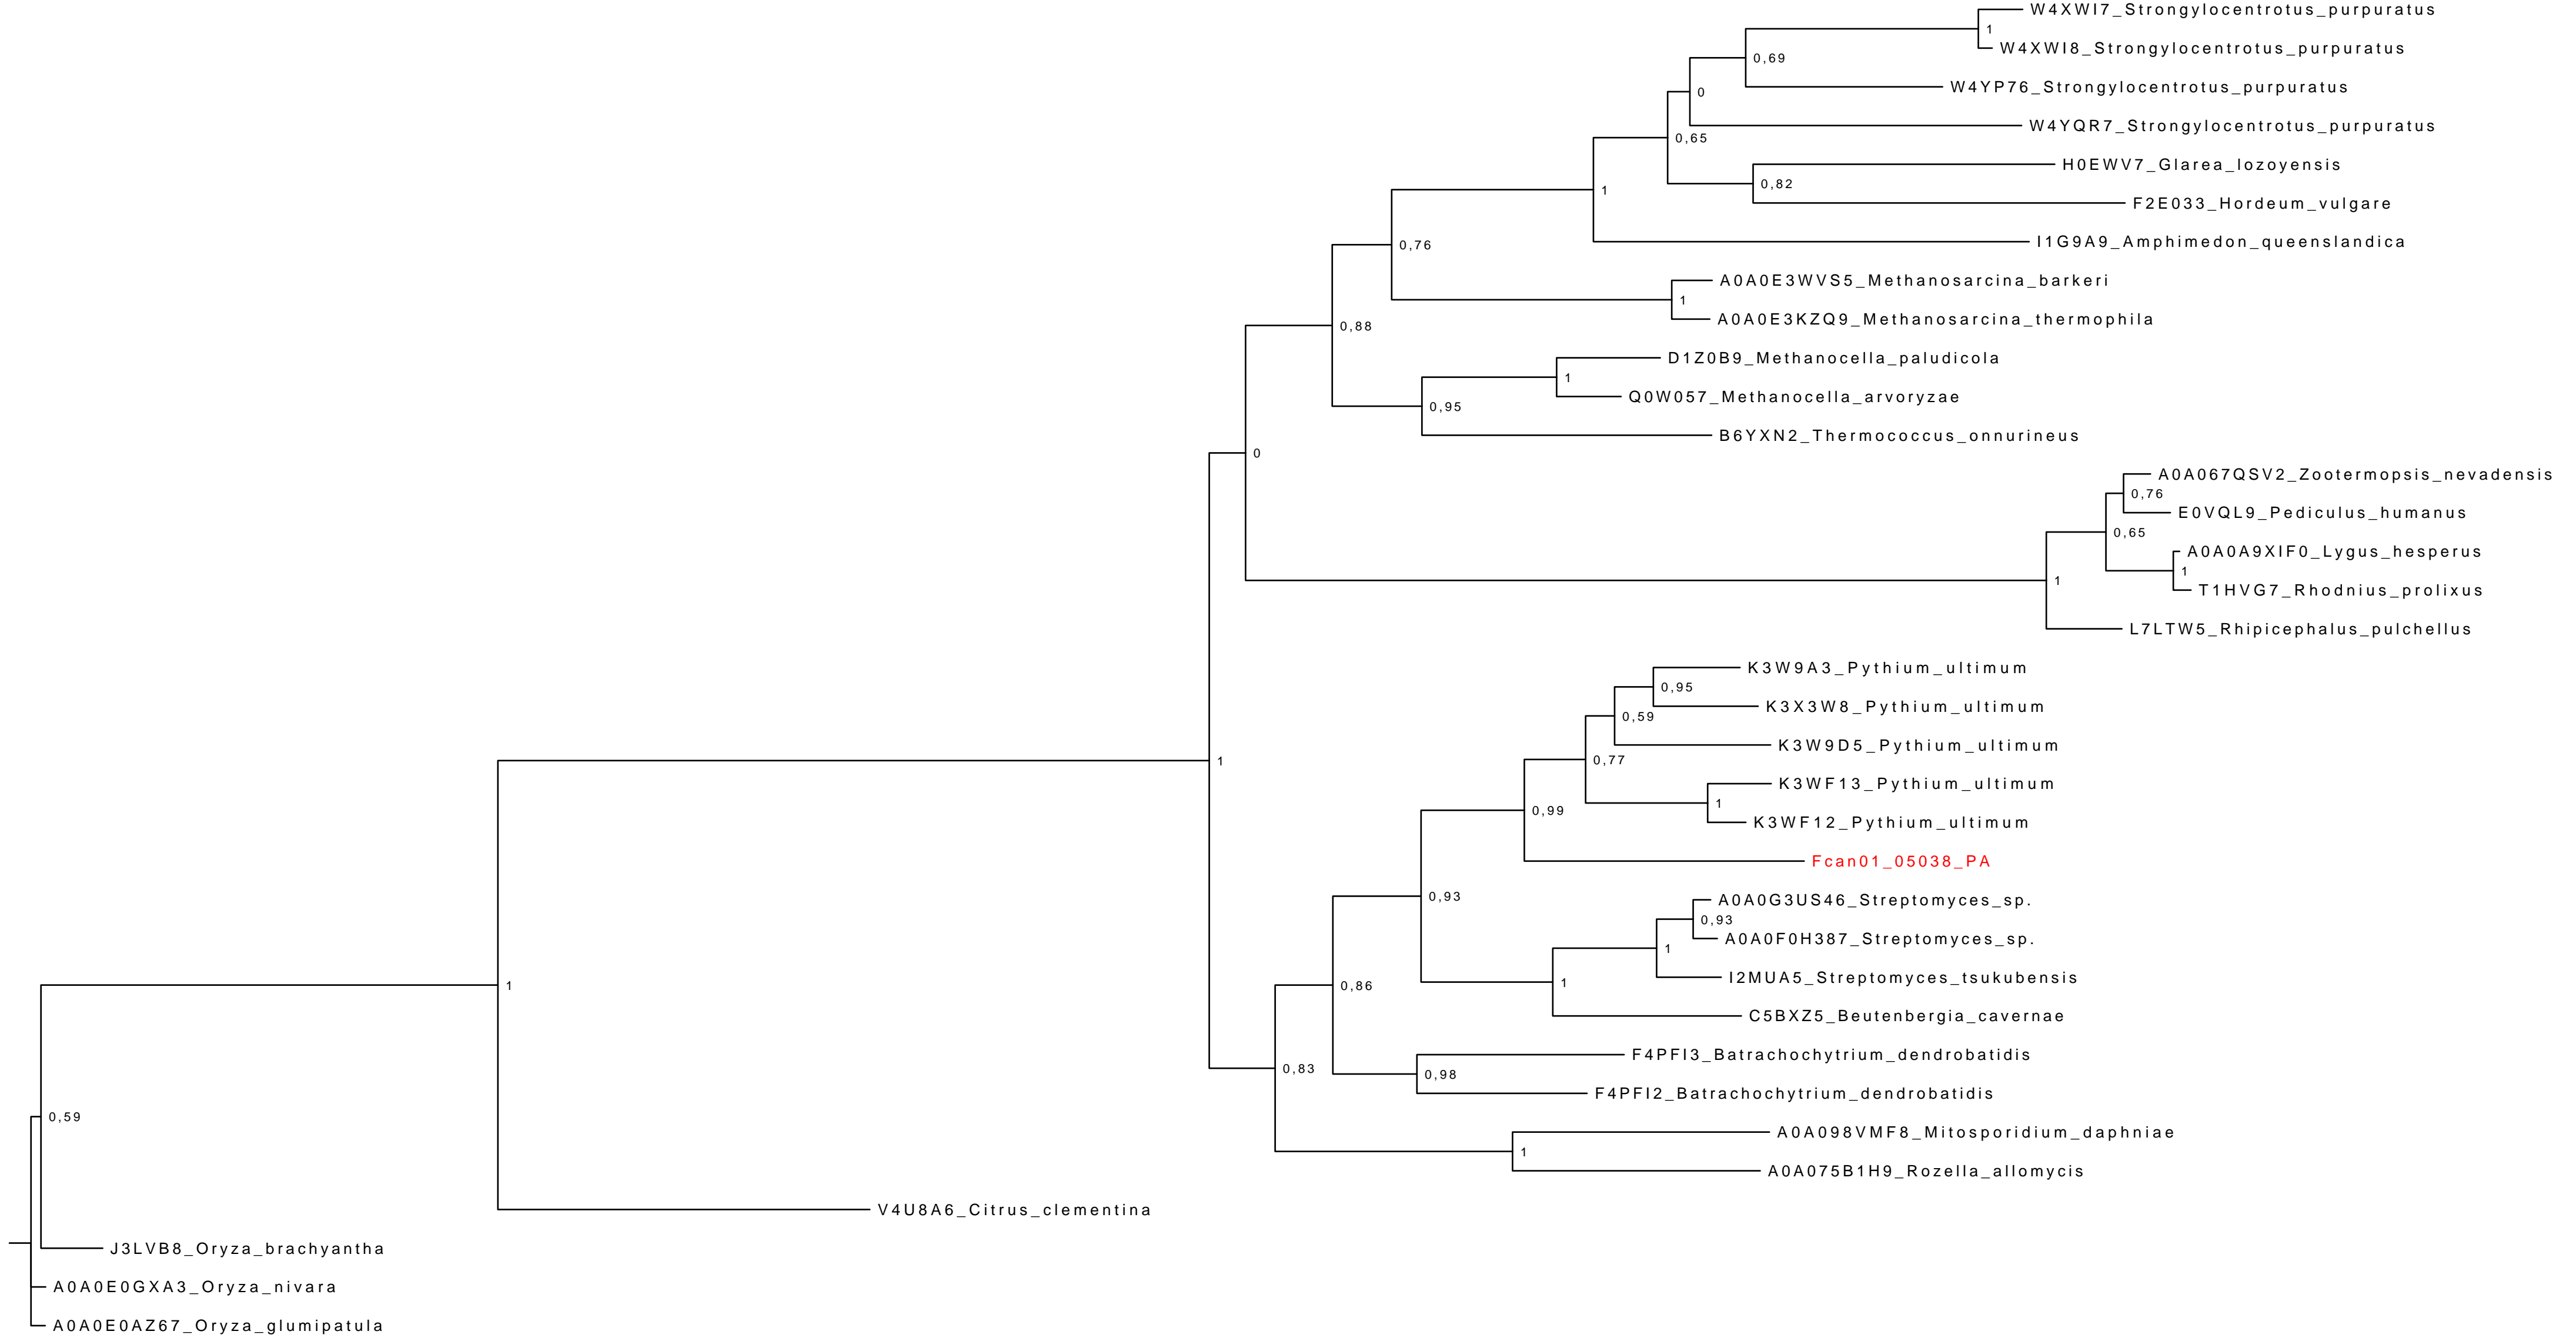

0.6

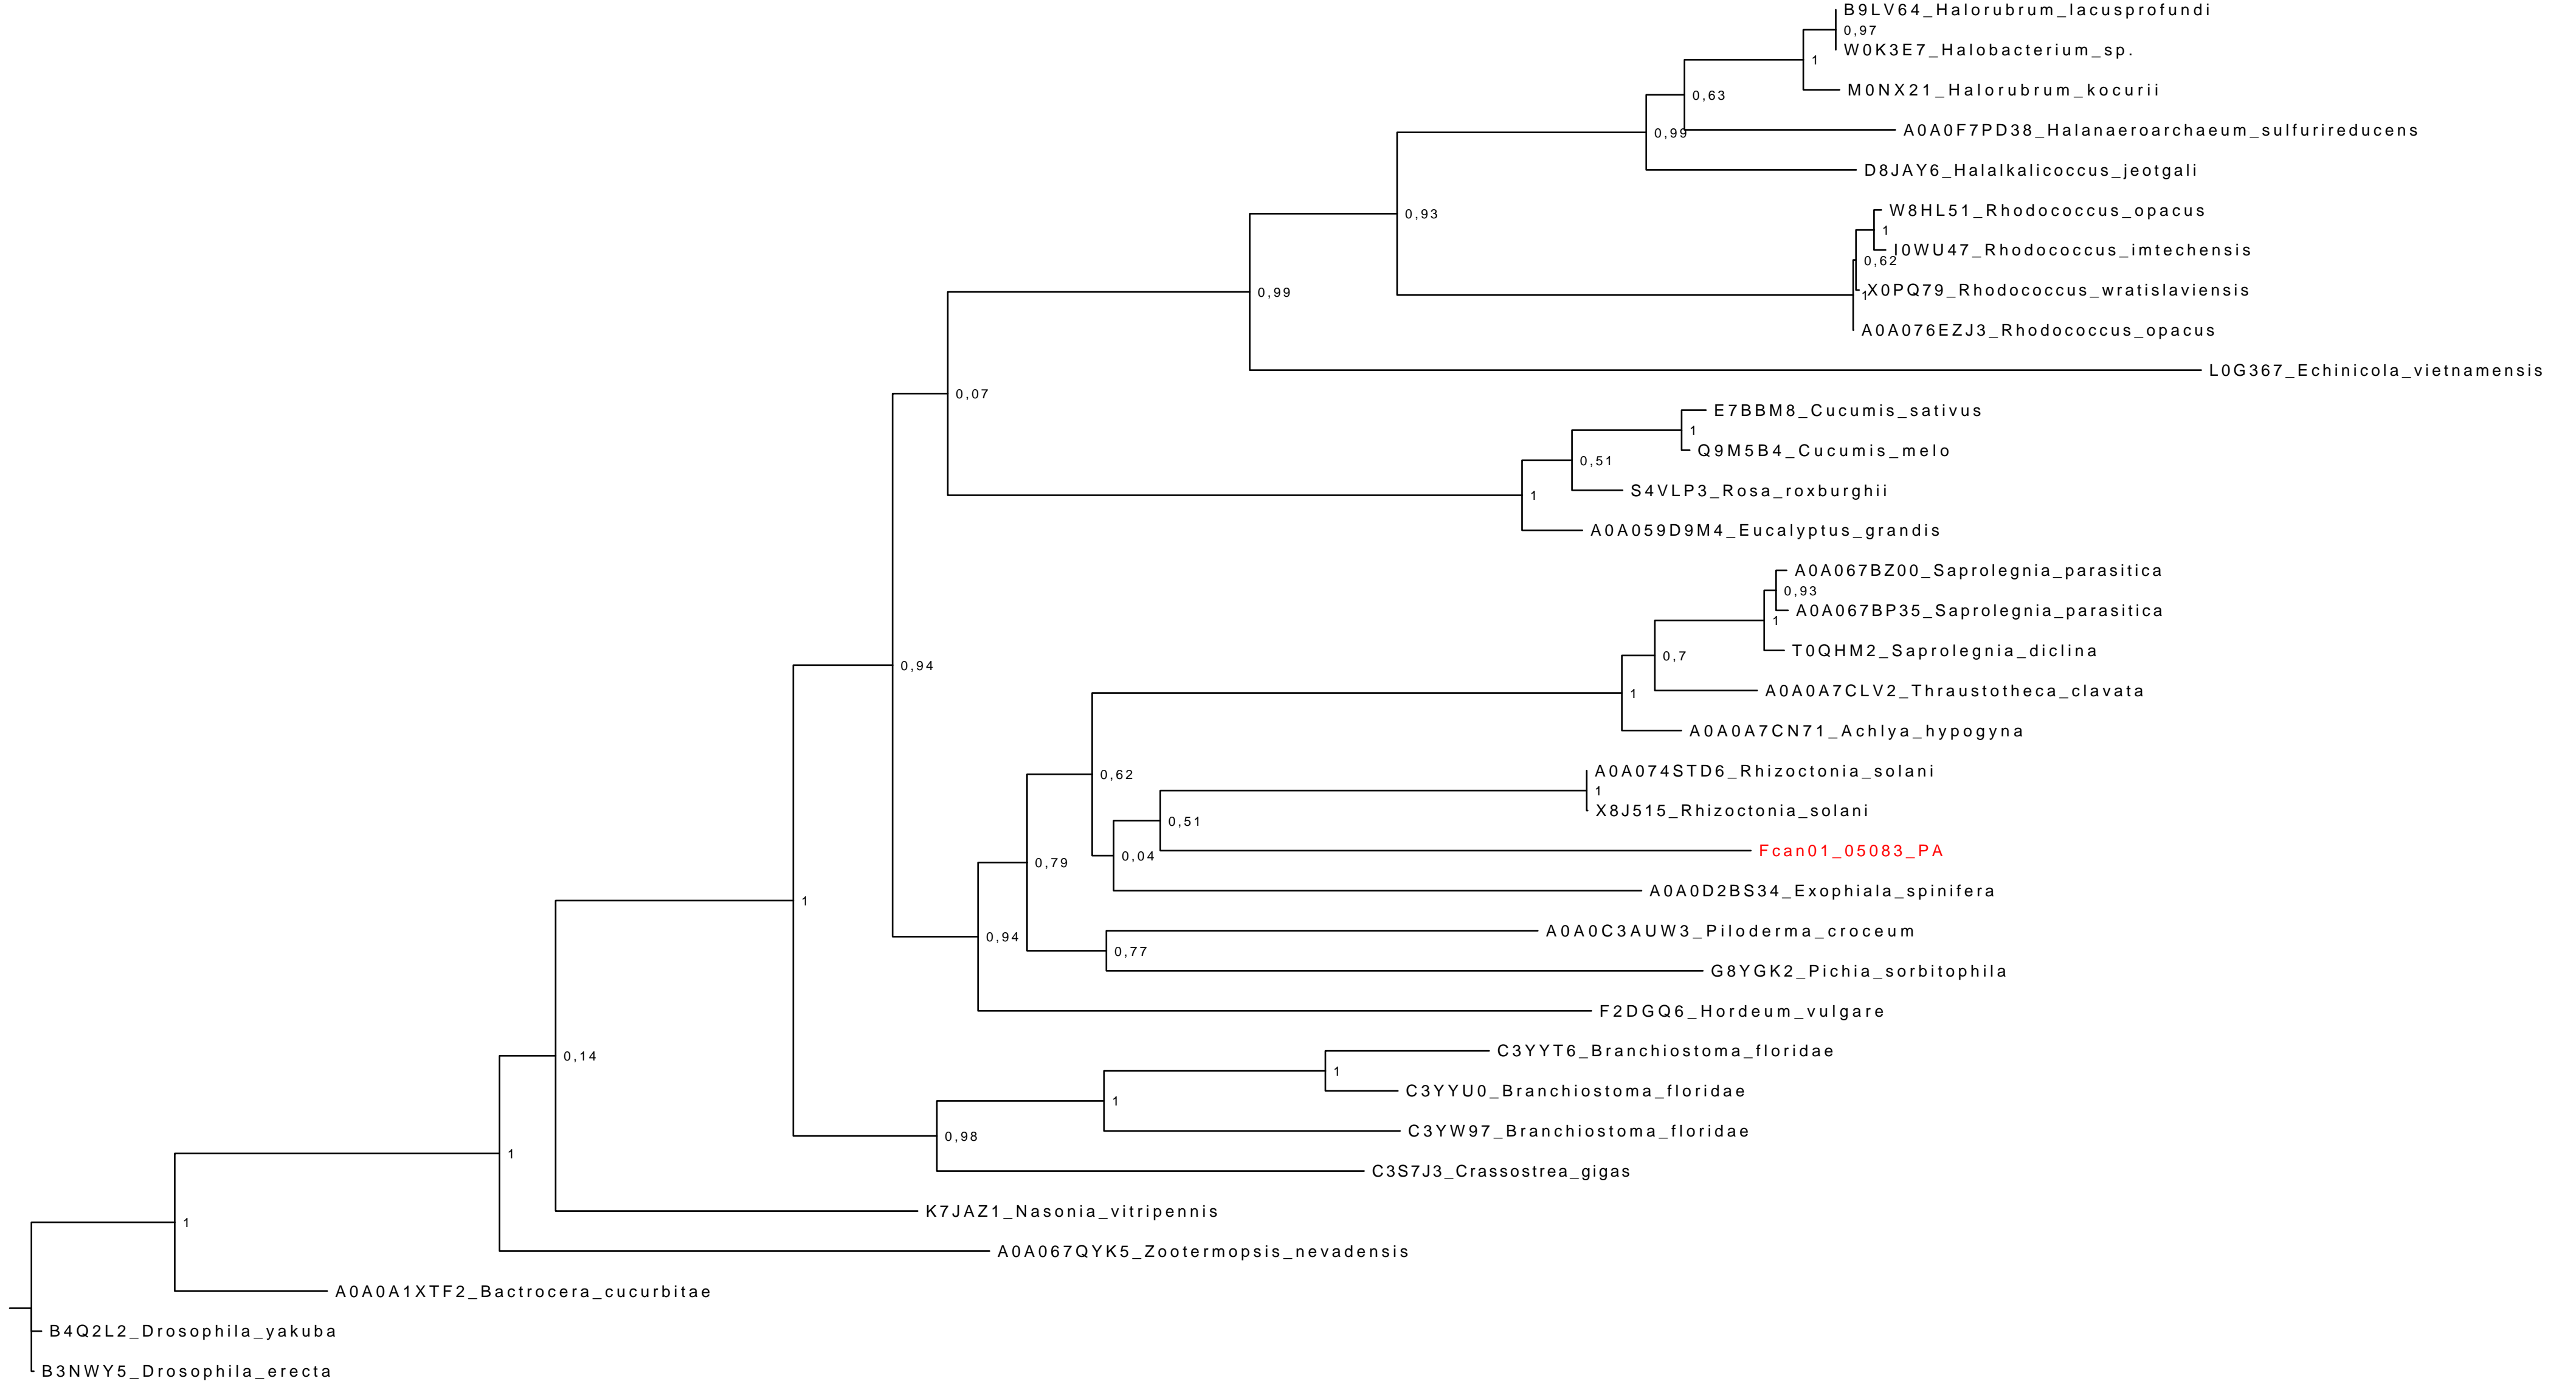



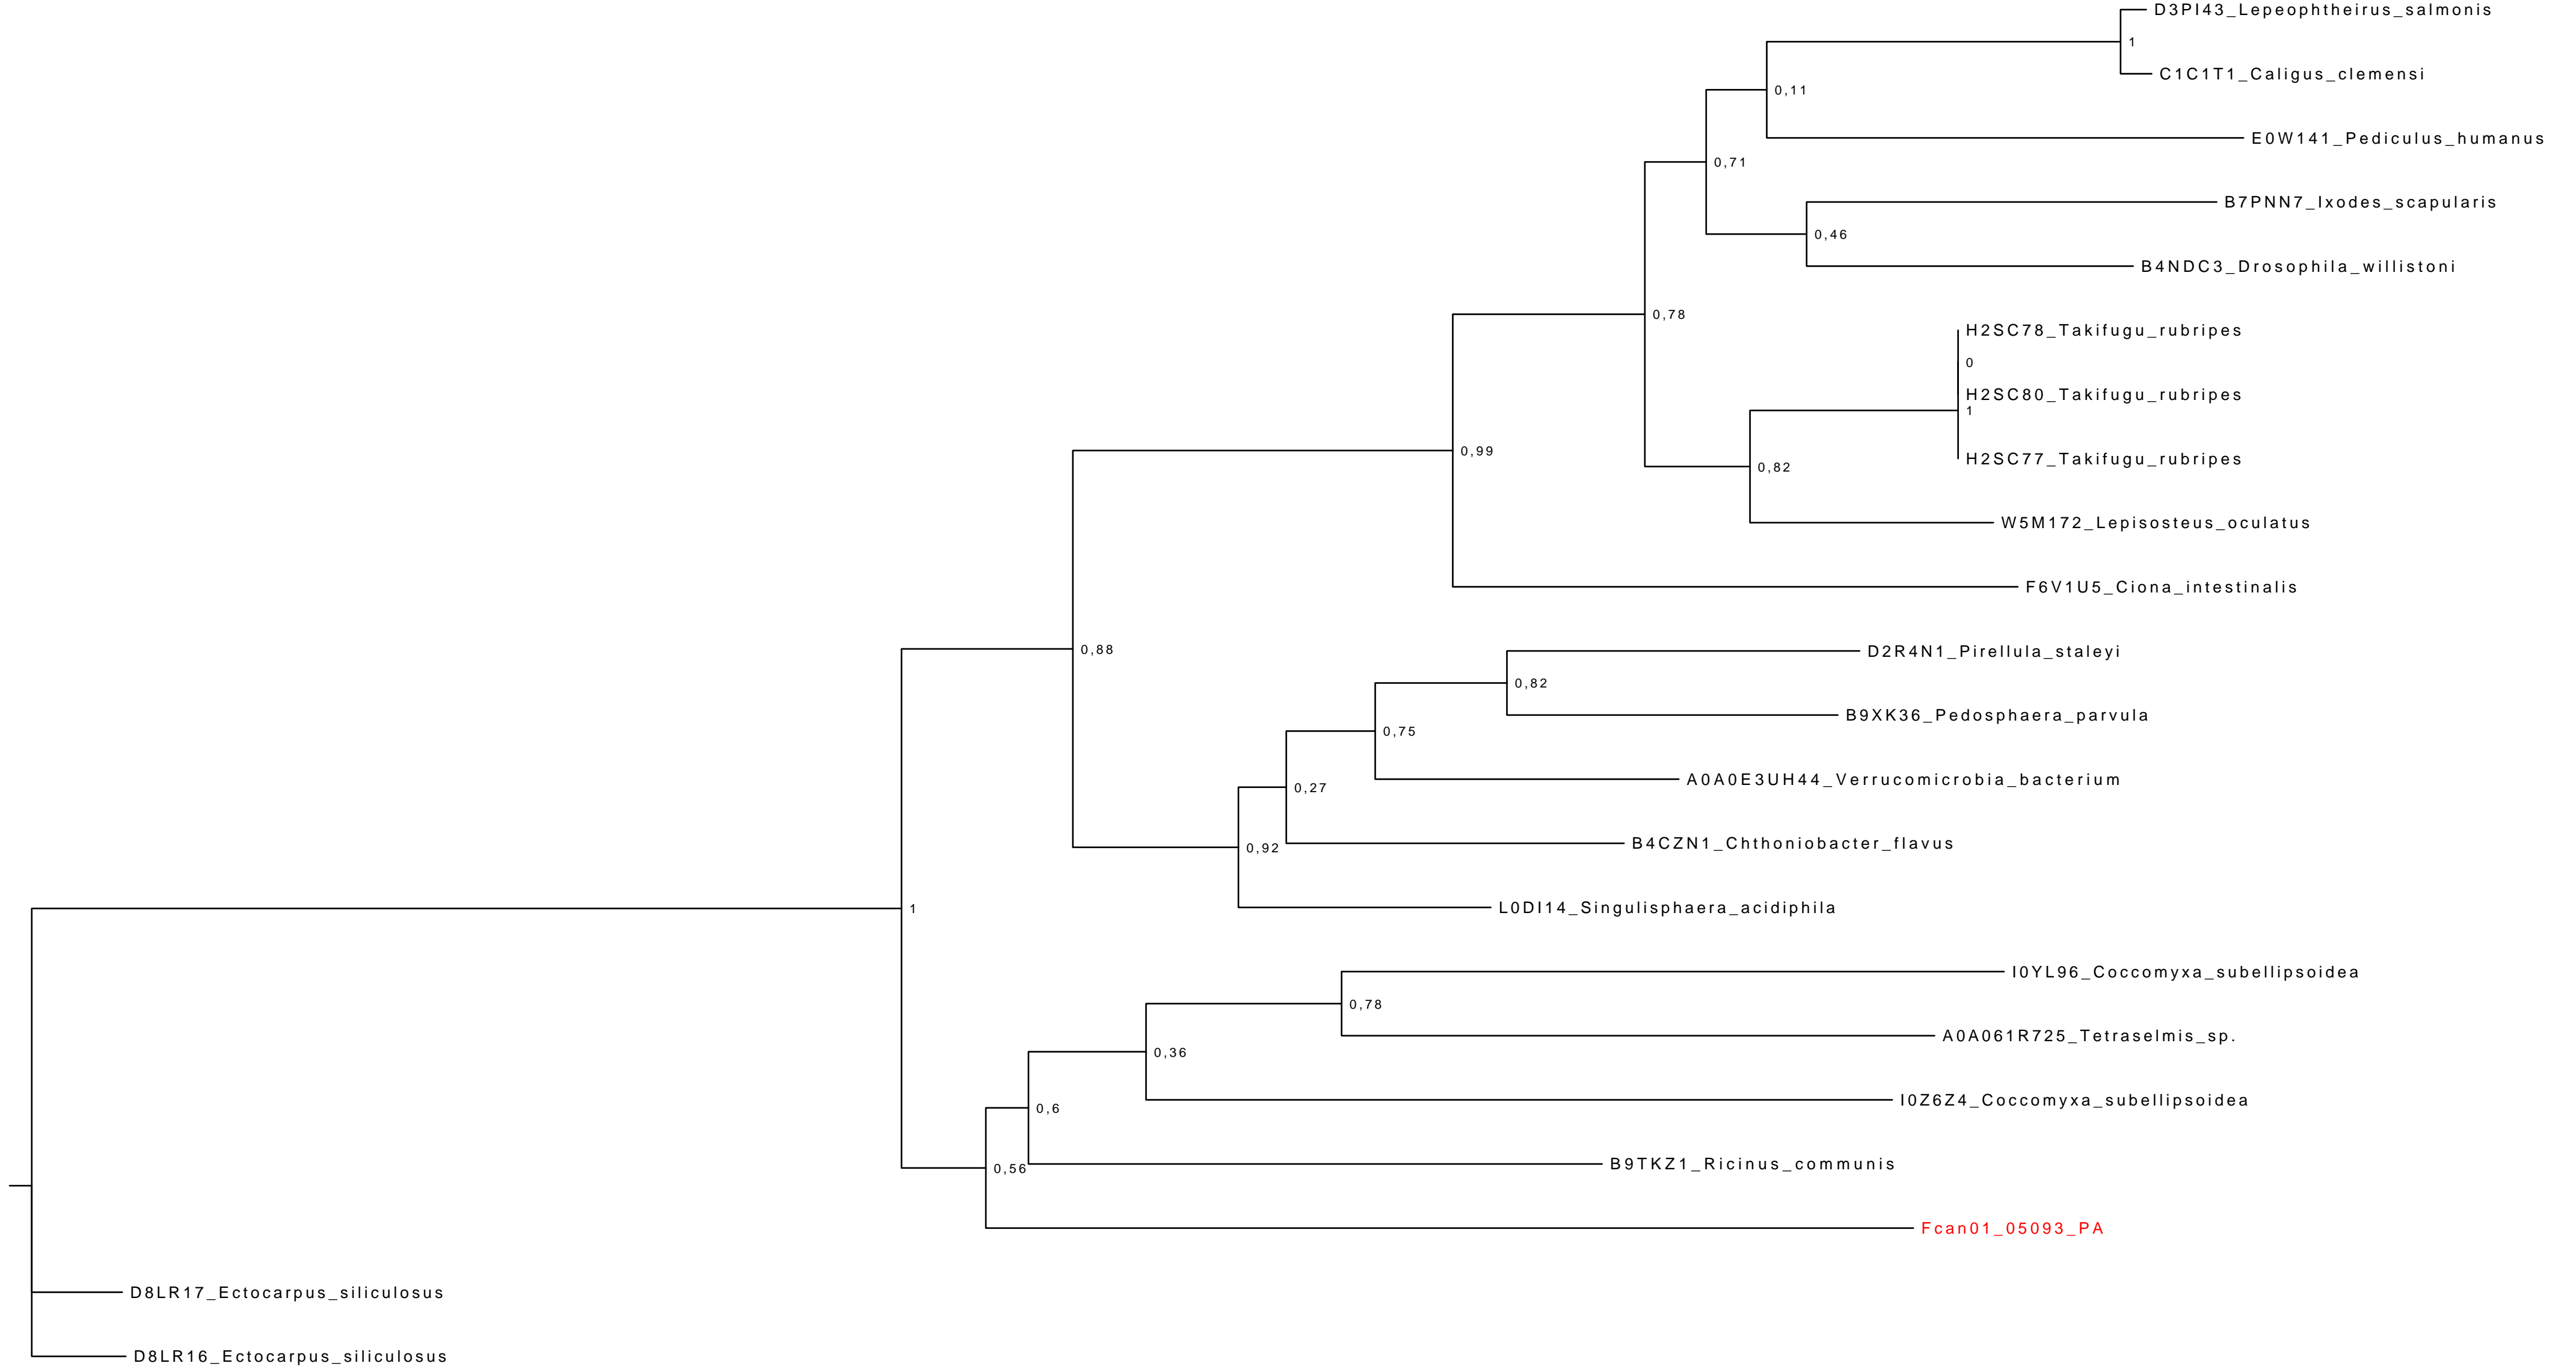

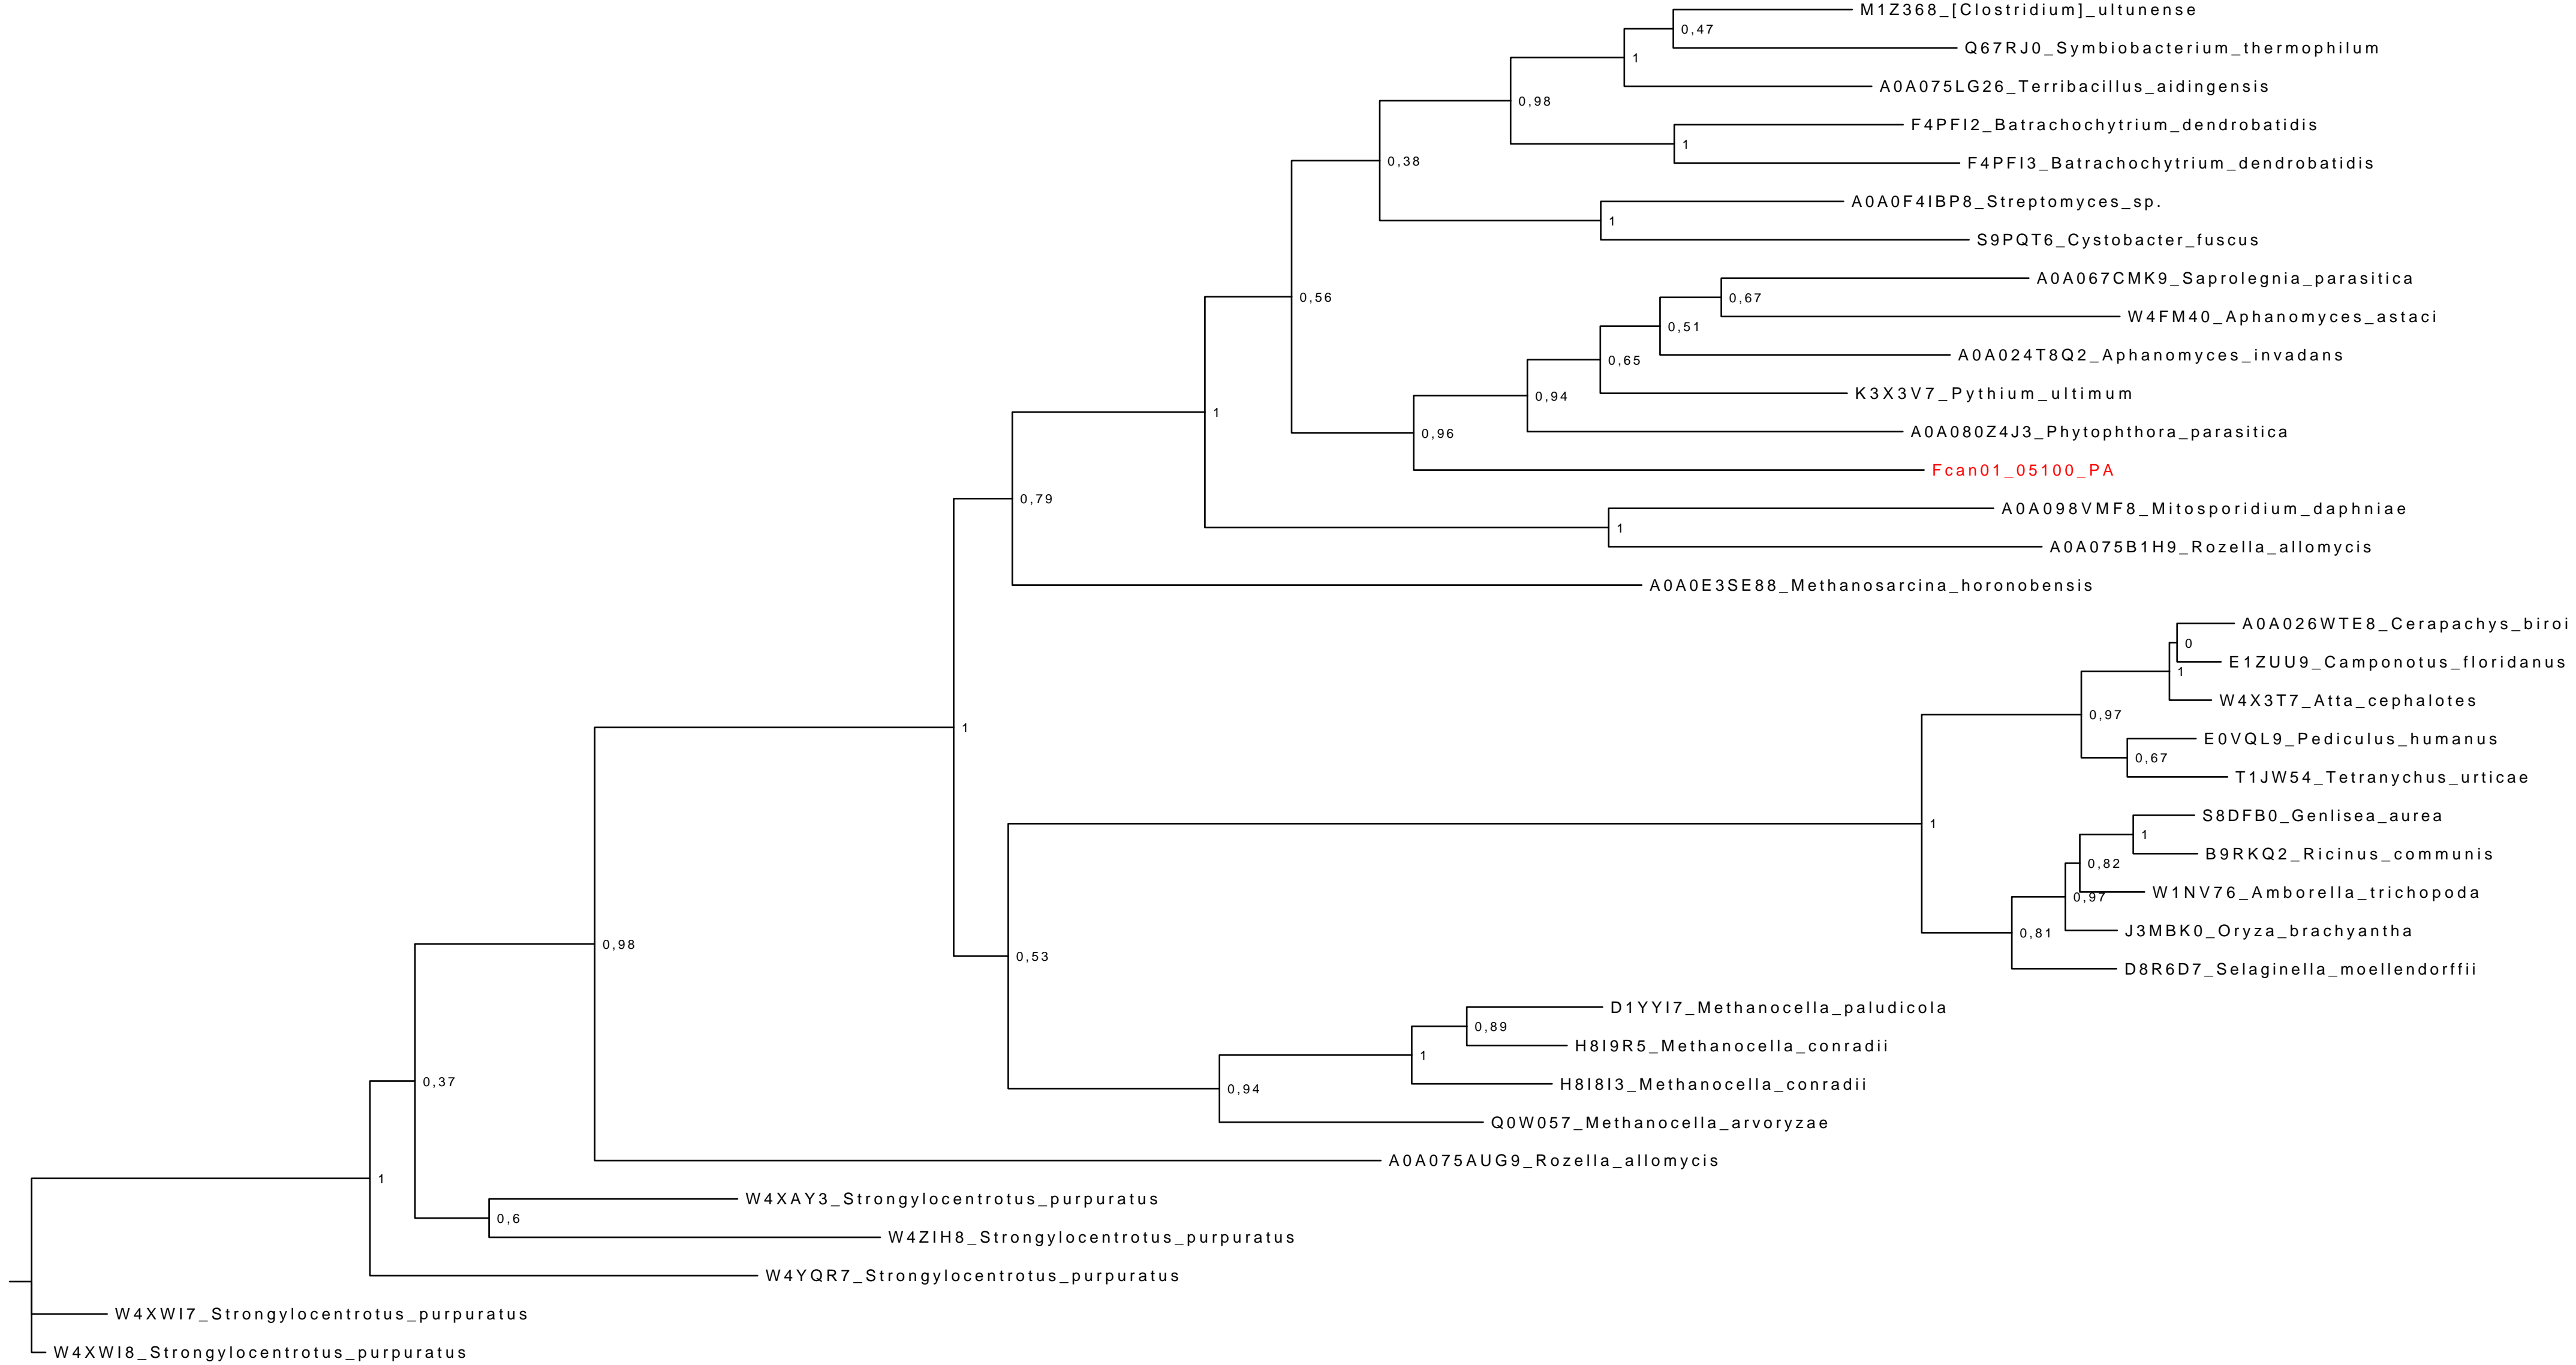

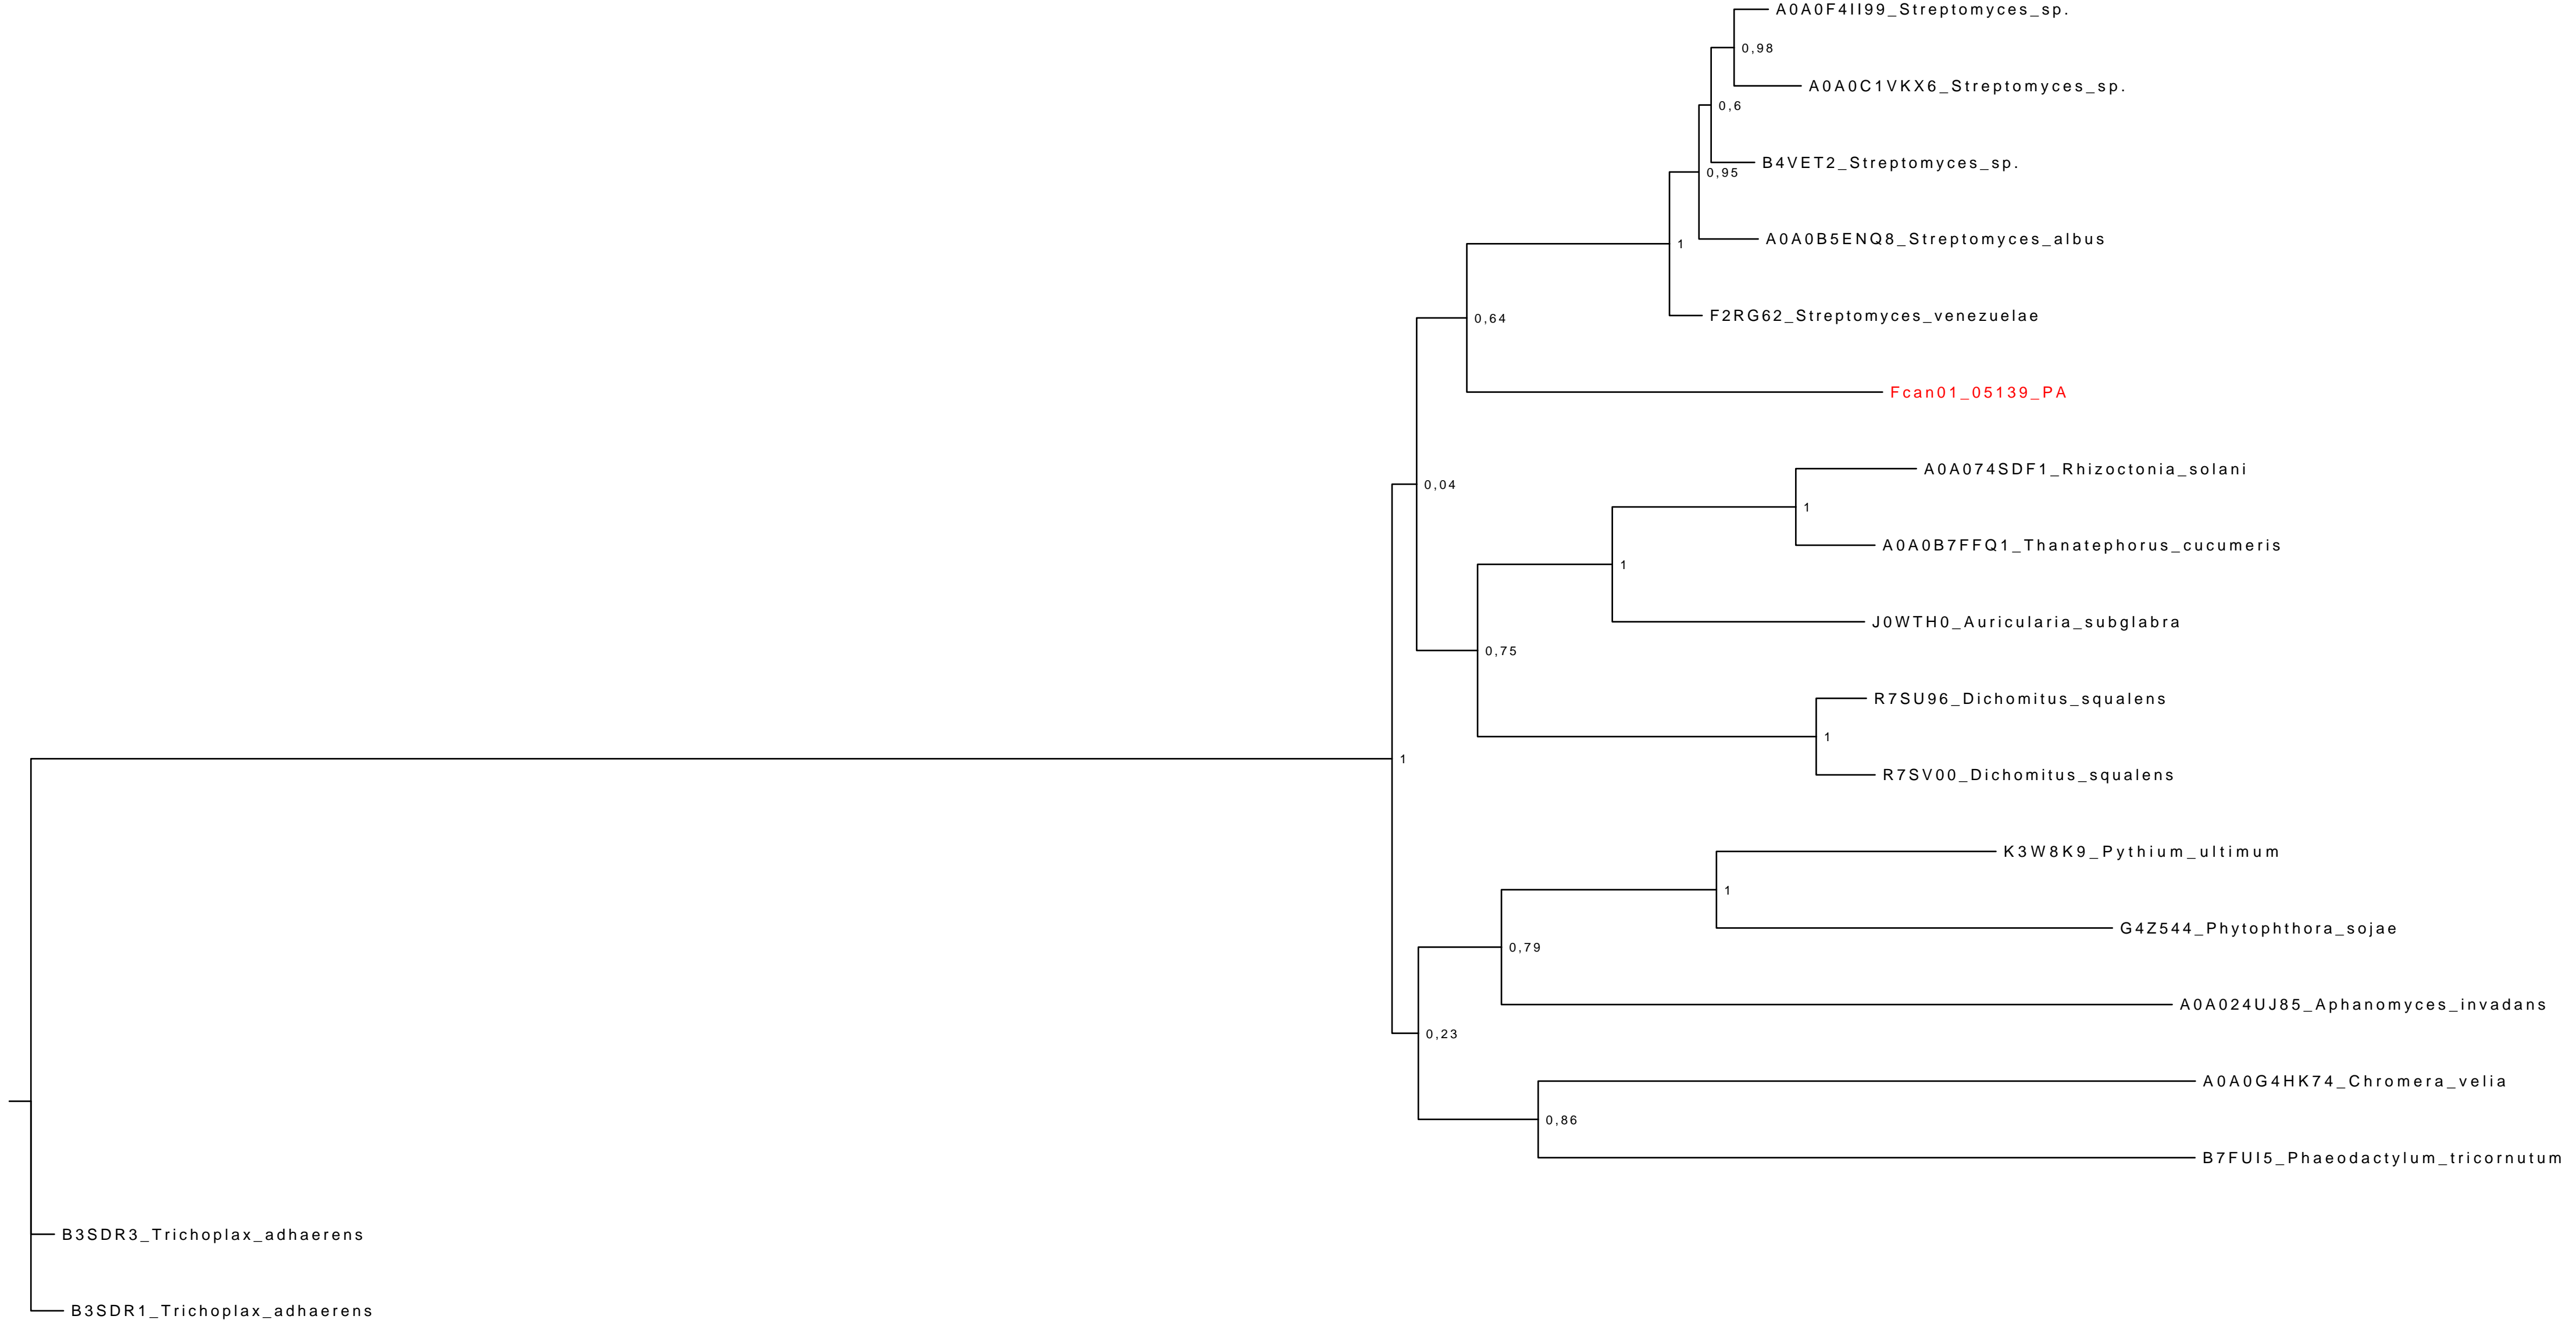

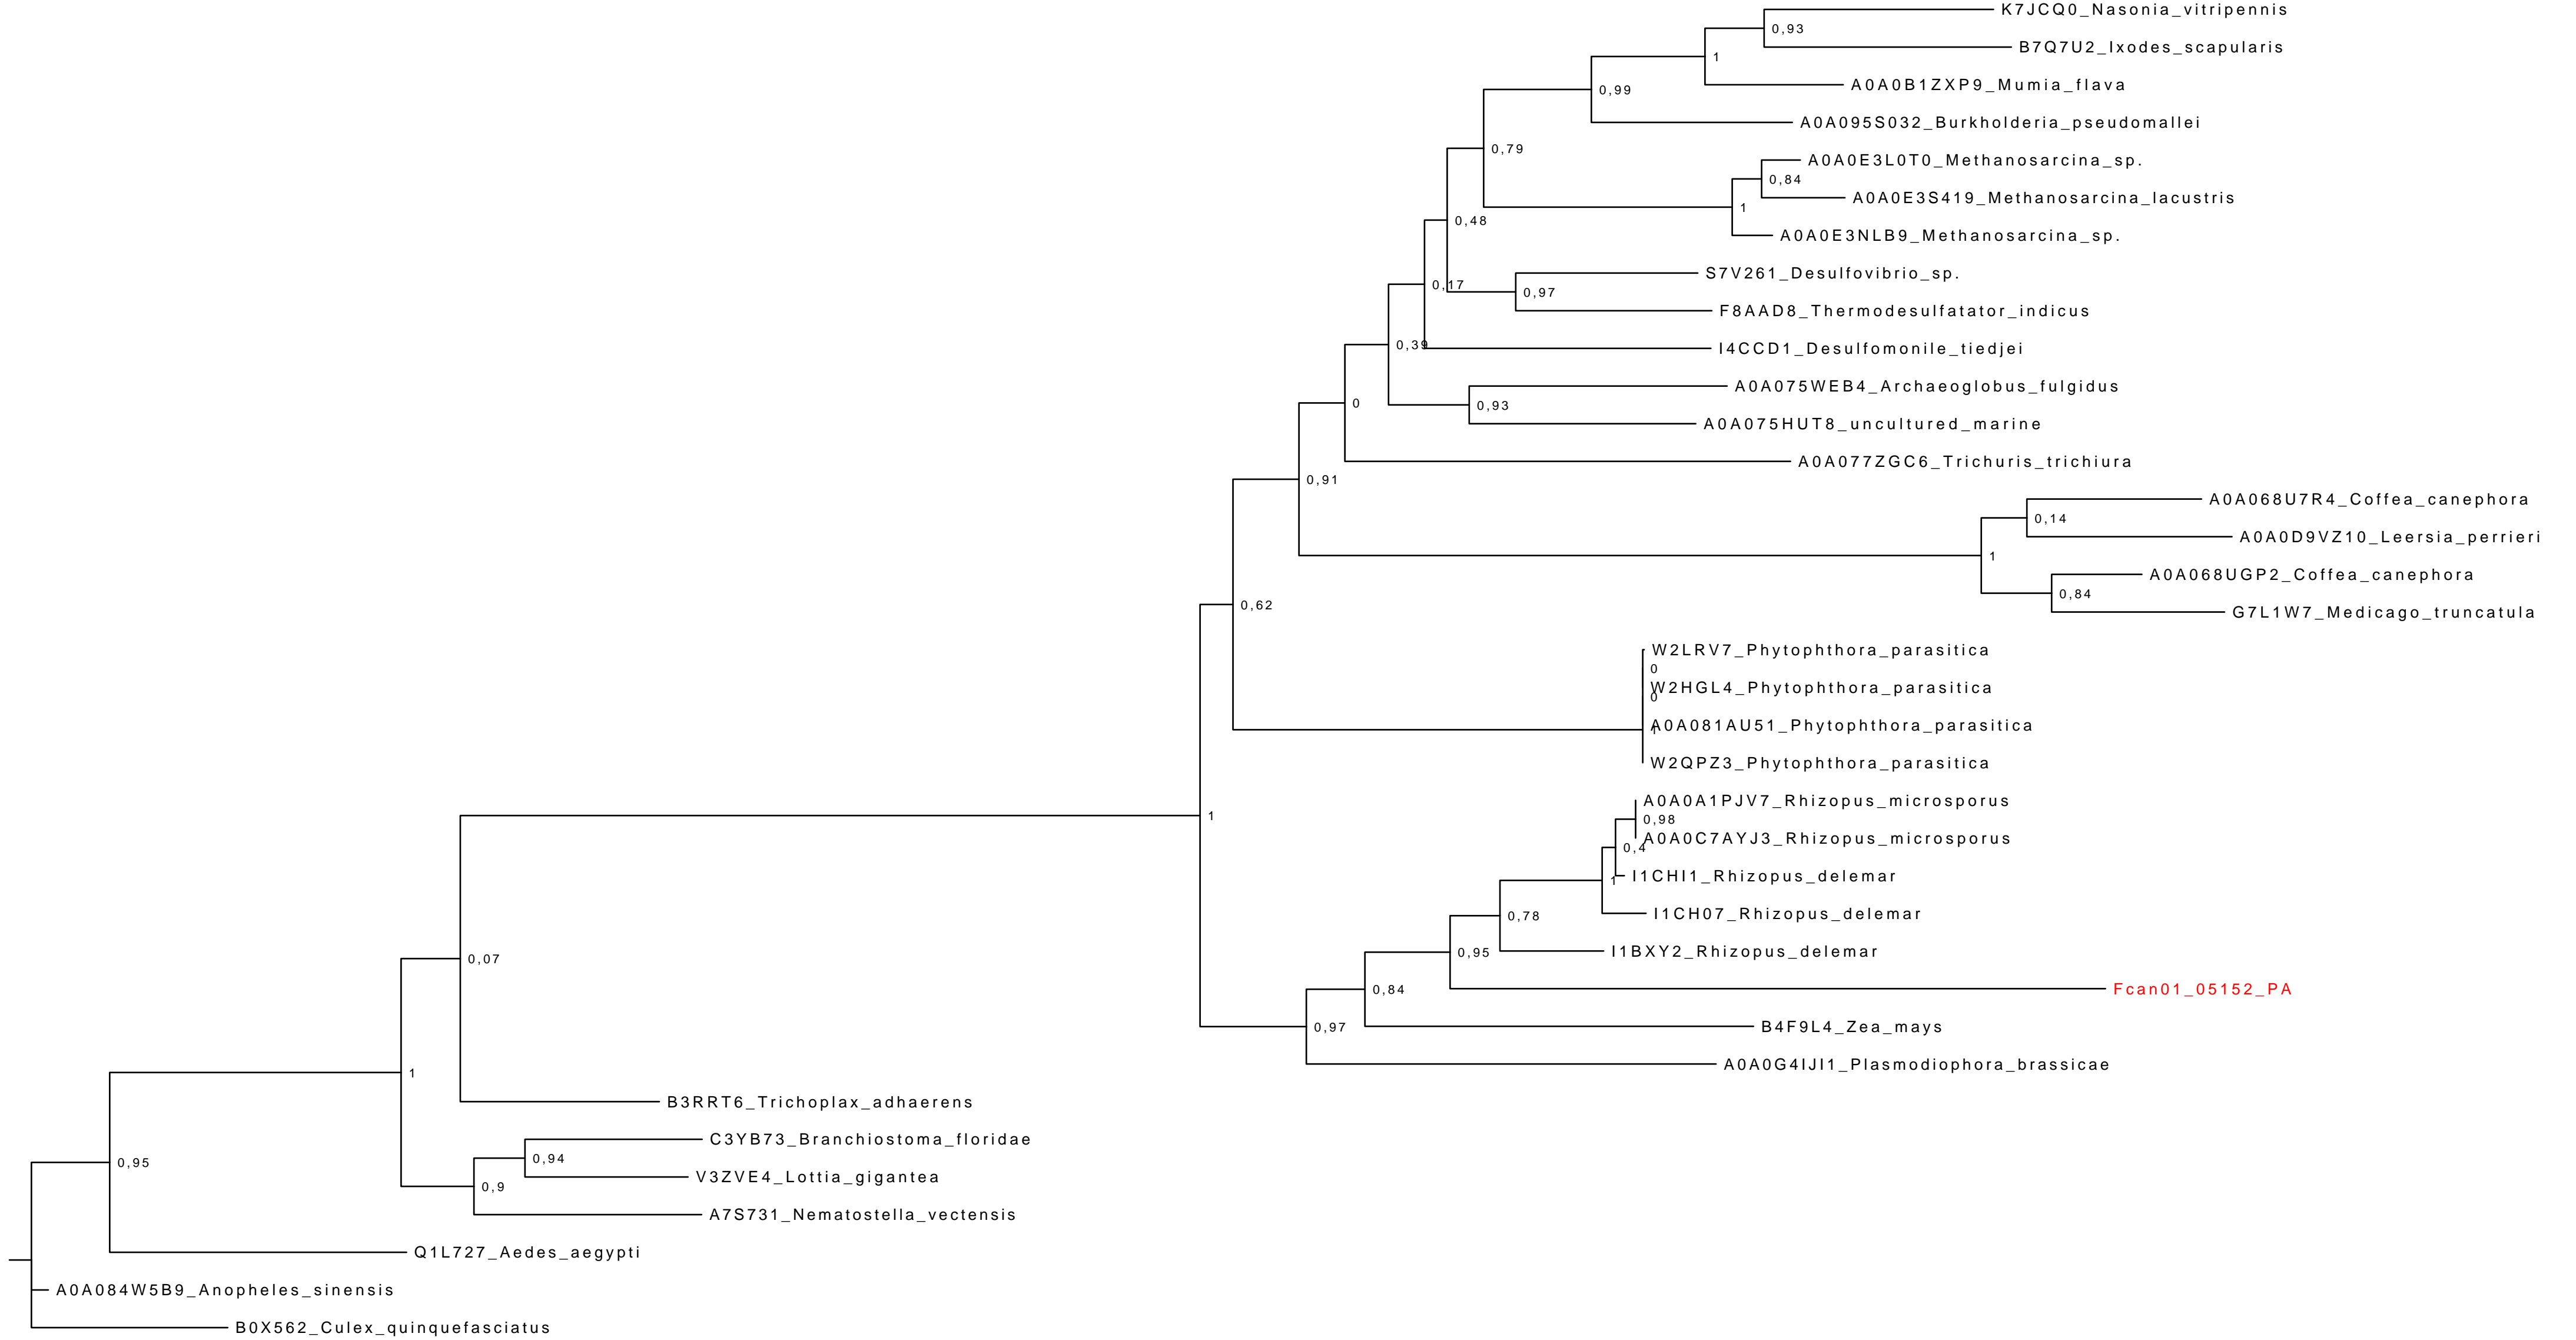

0.4

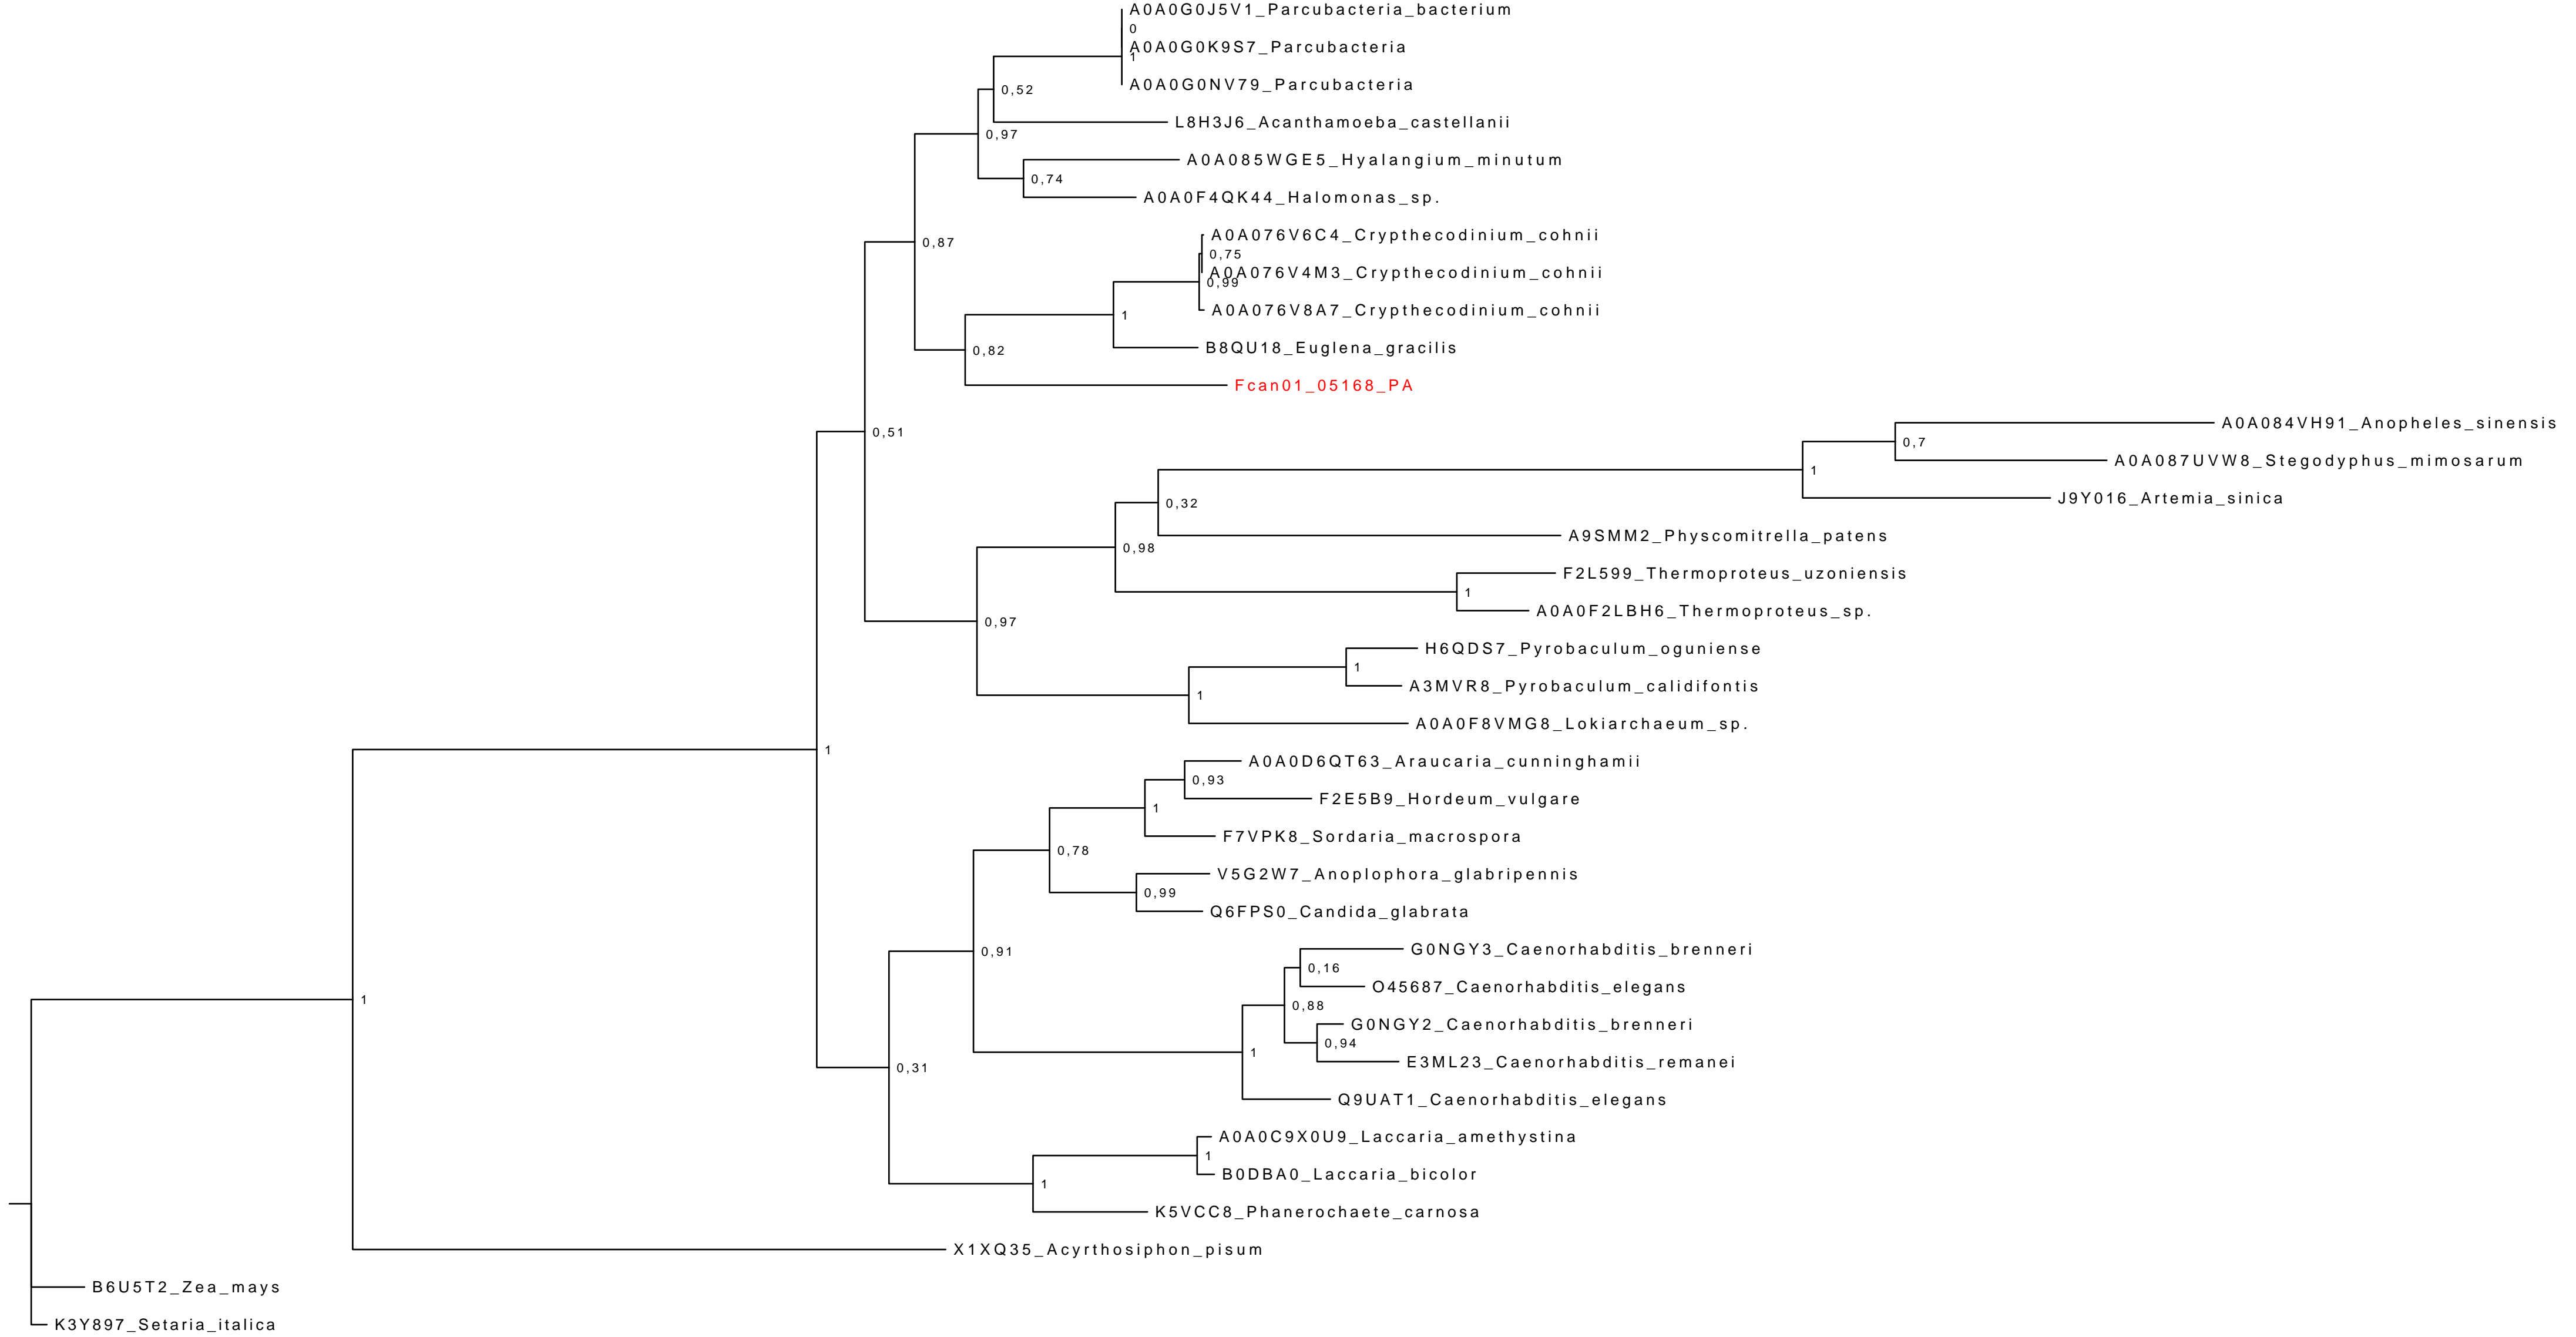

0.5

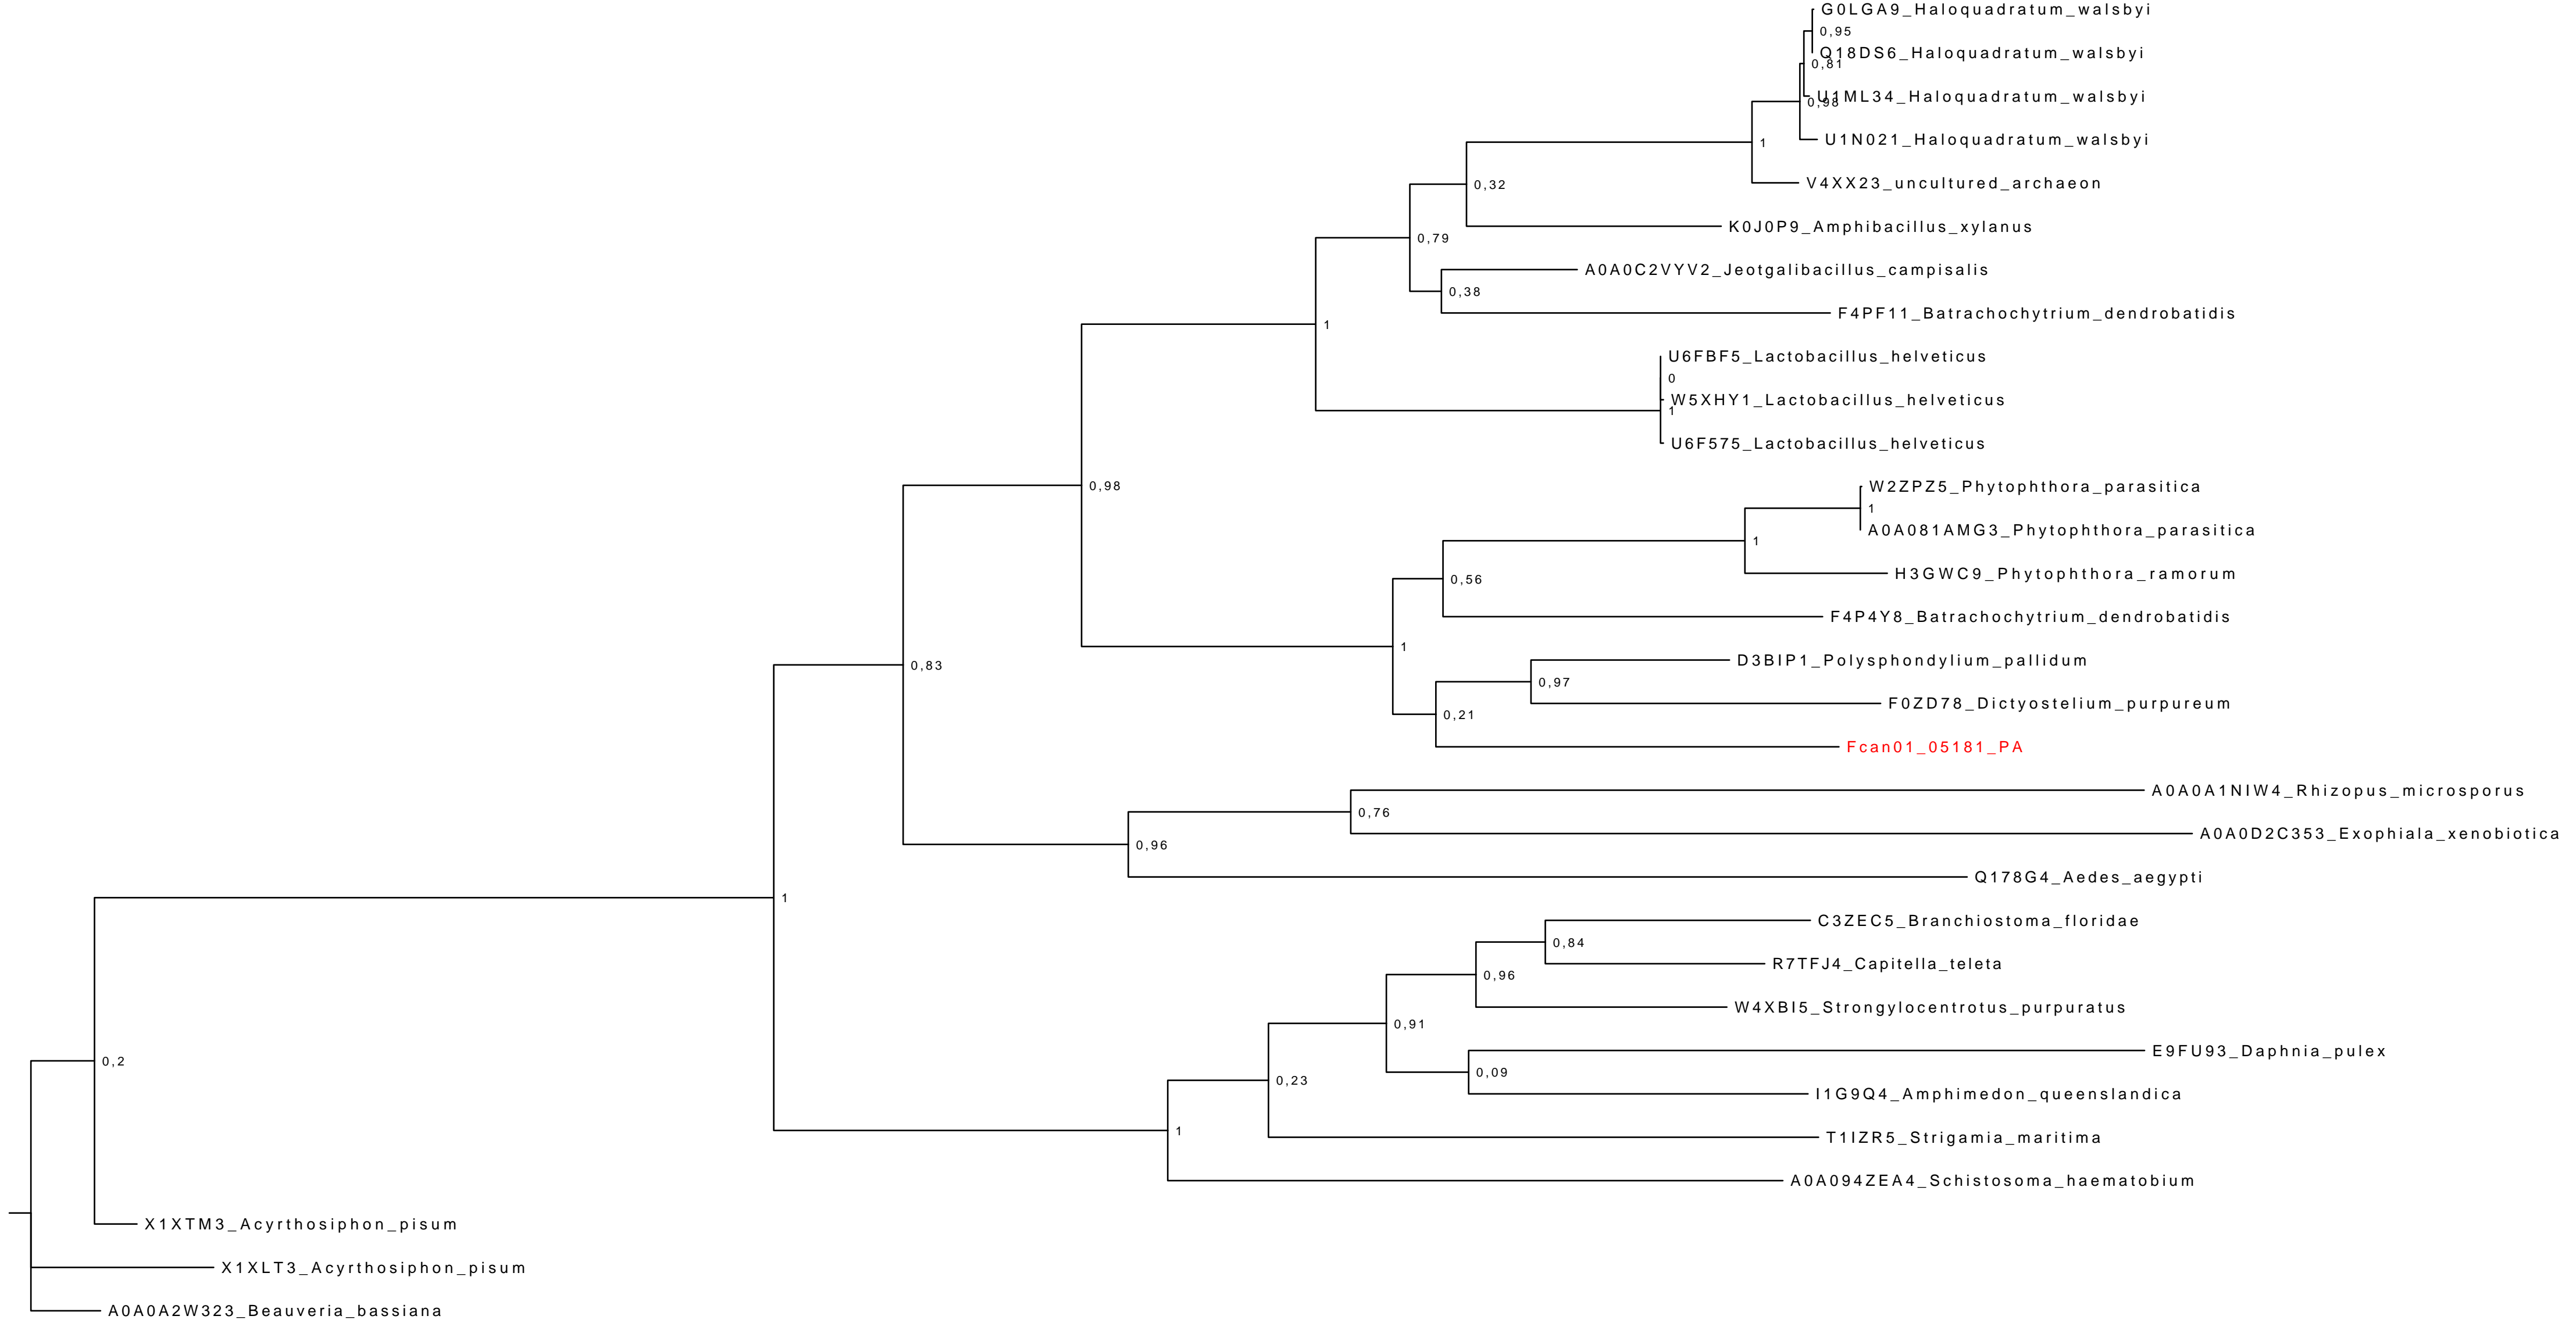

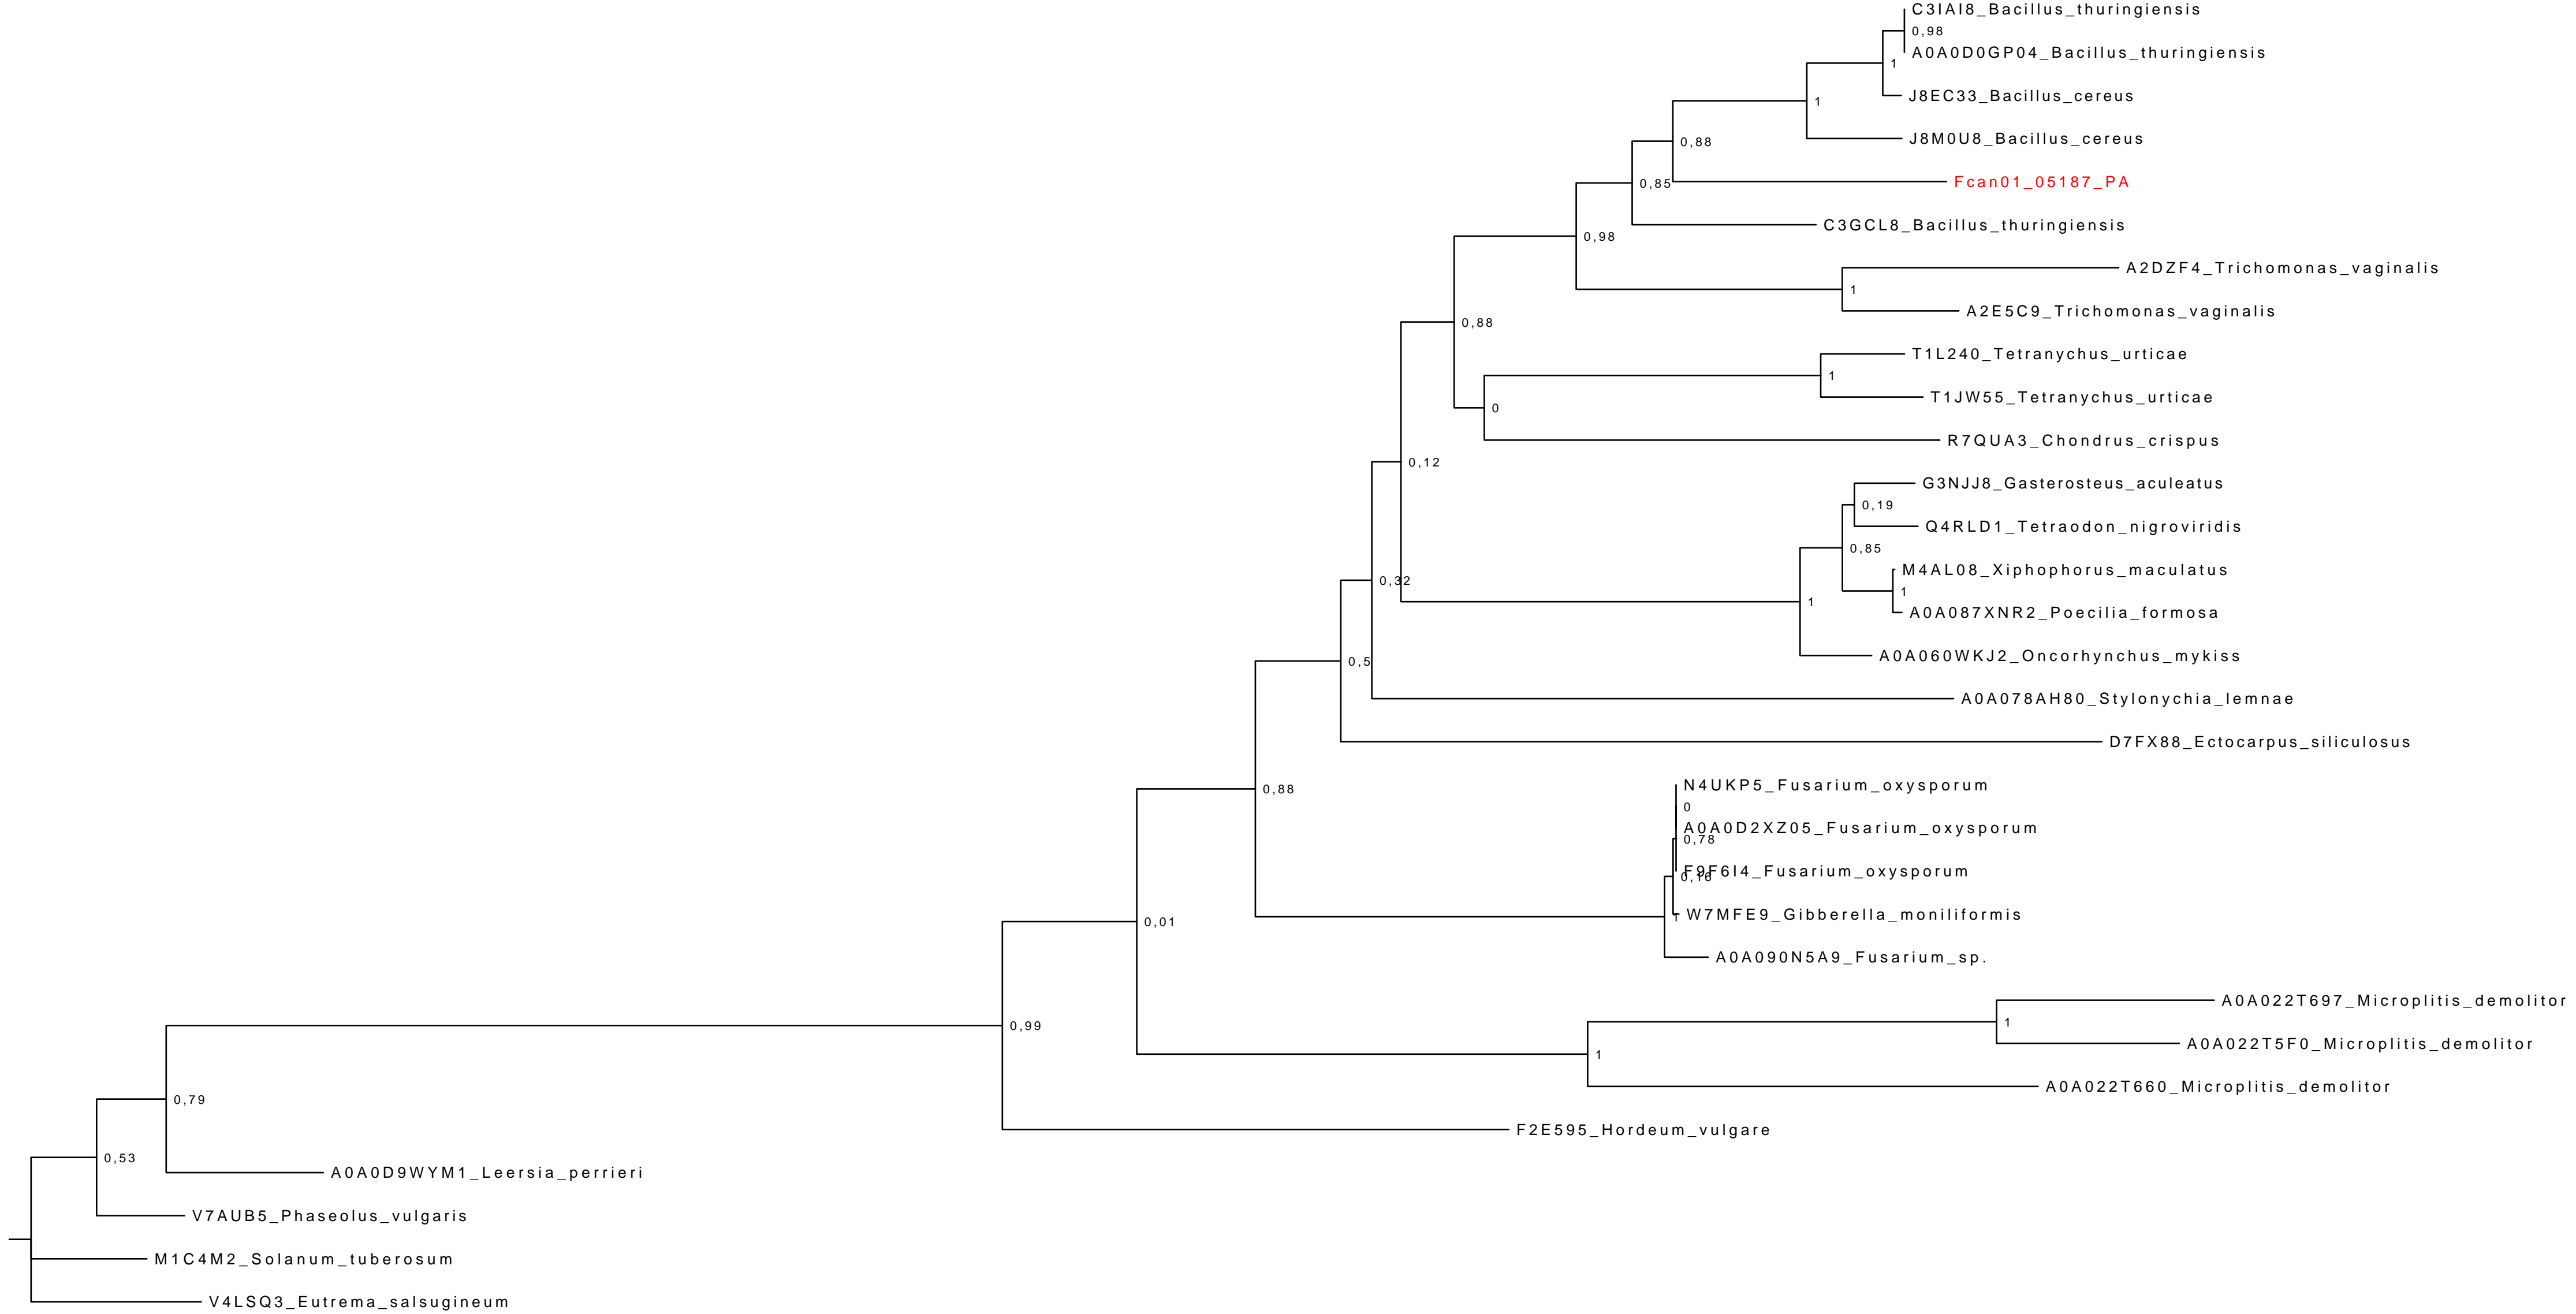

0.5

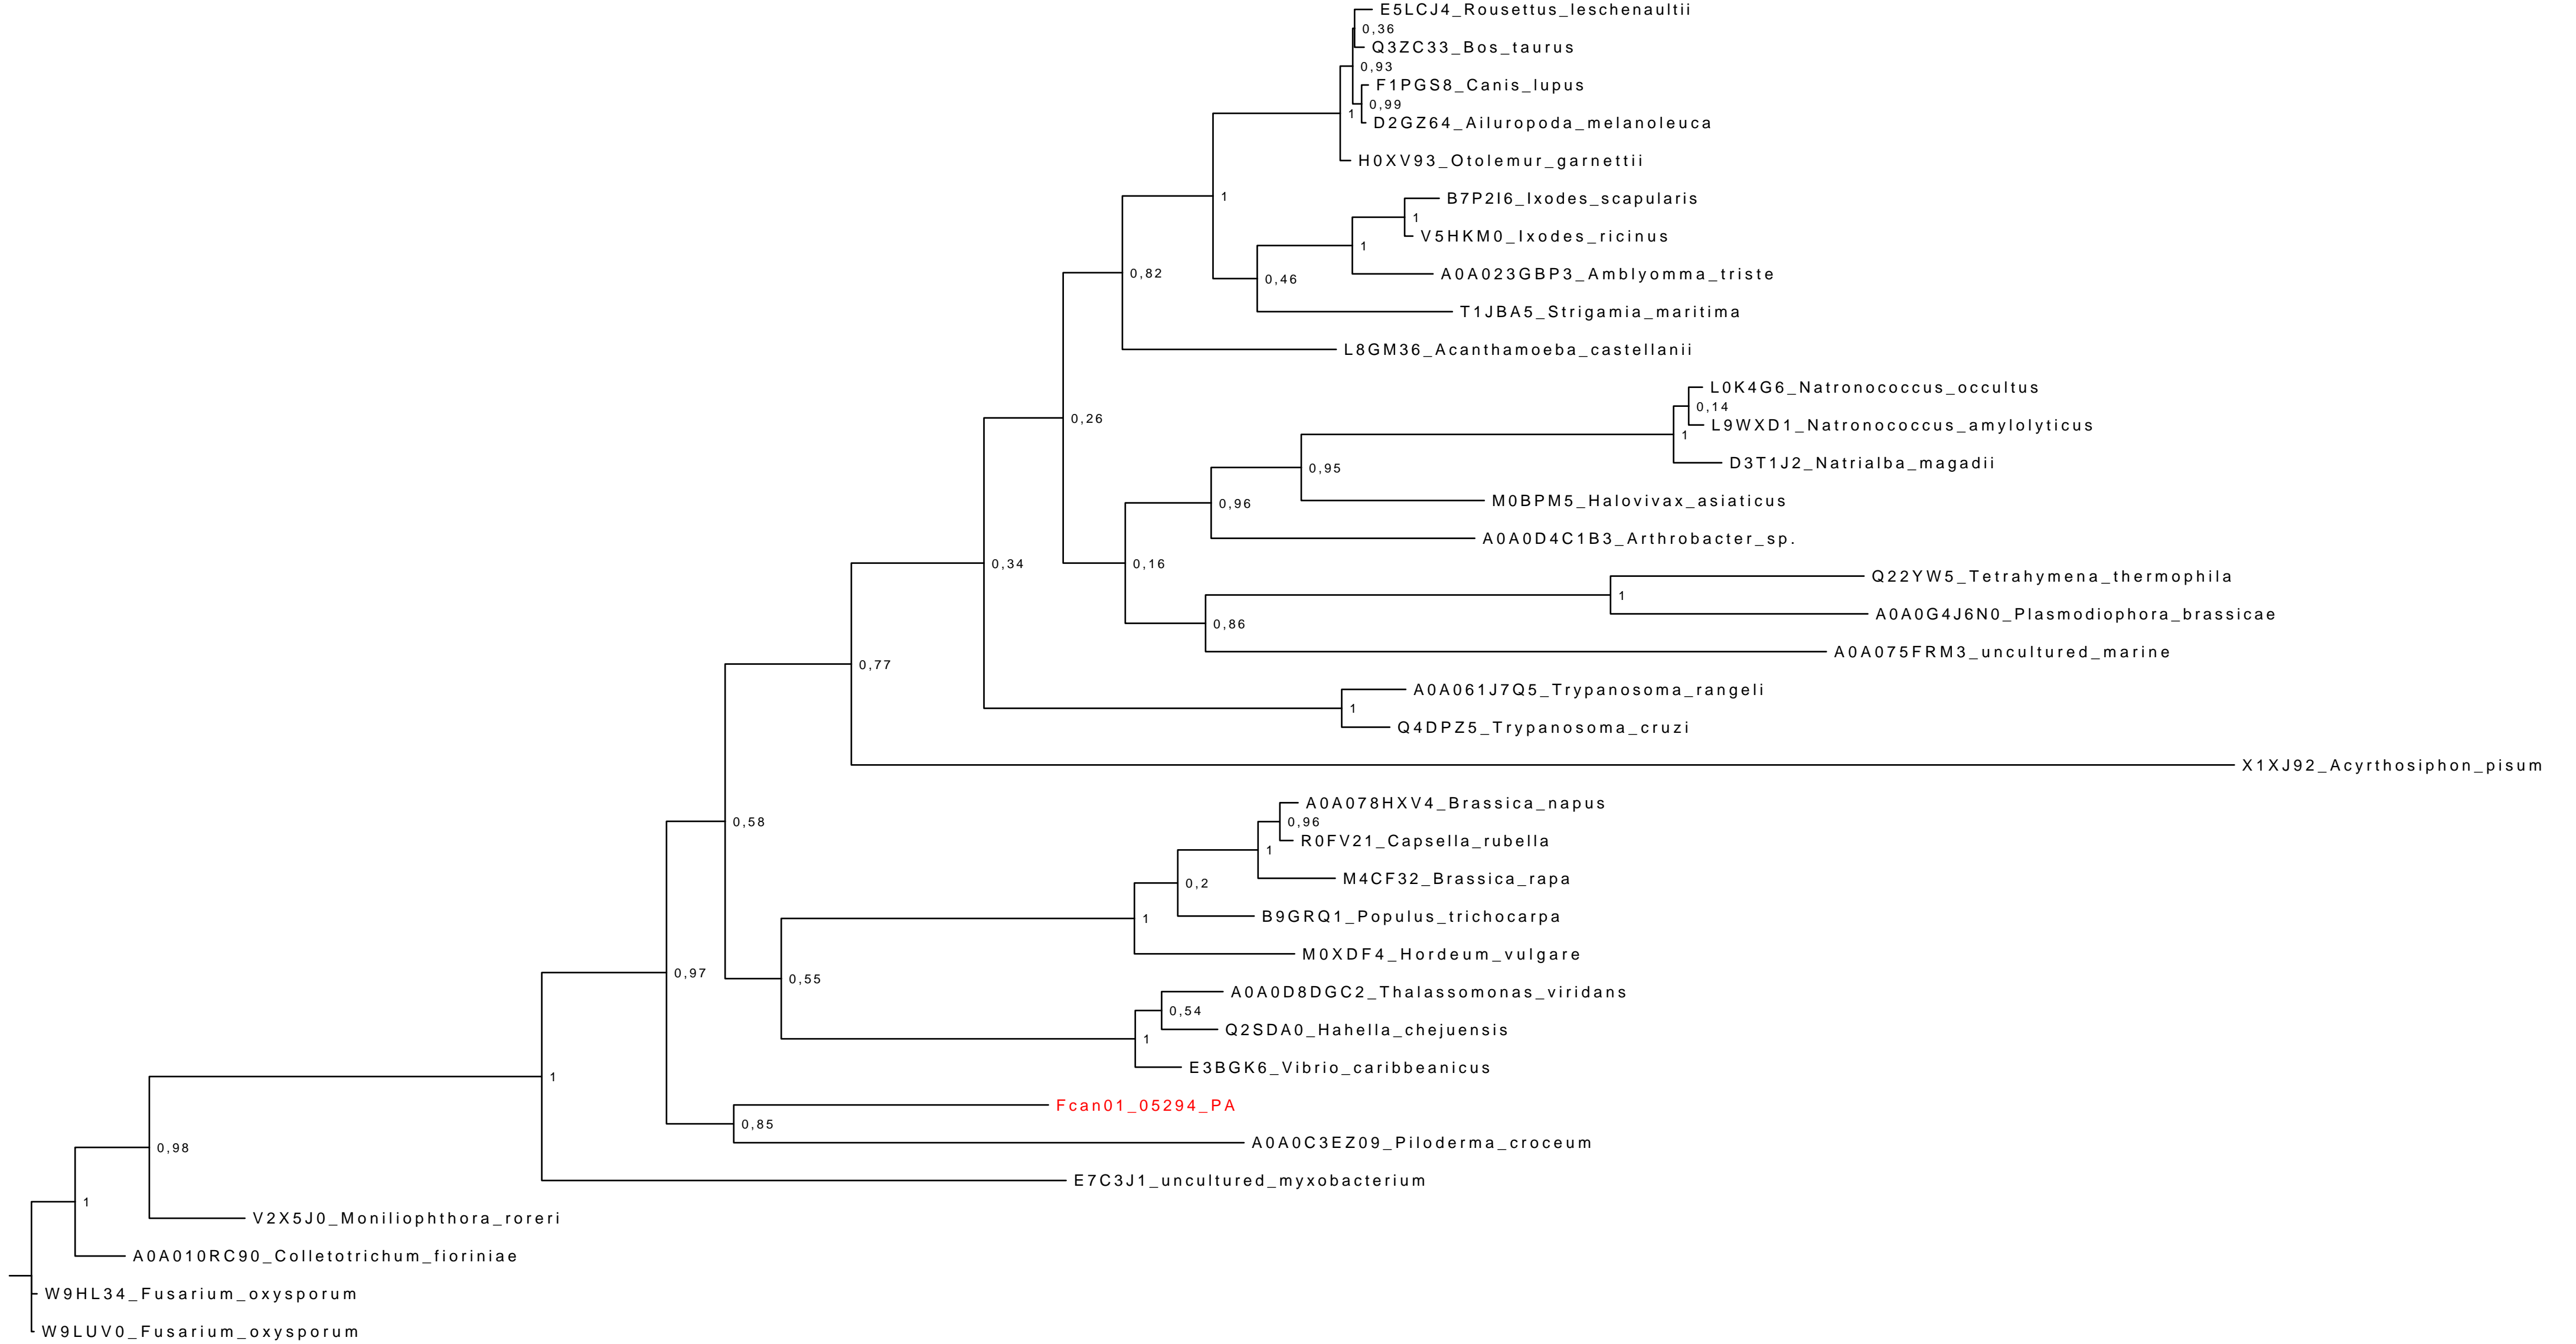



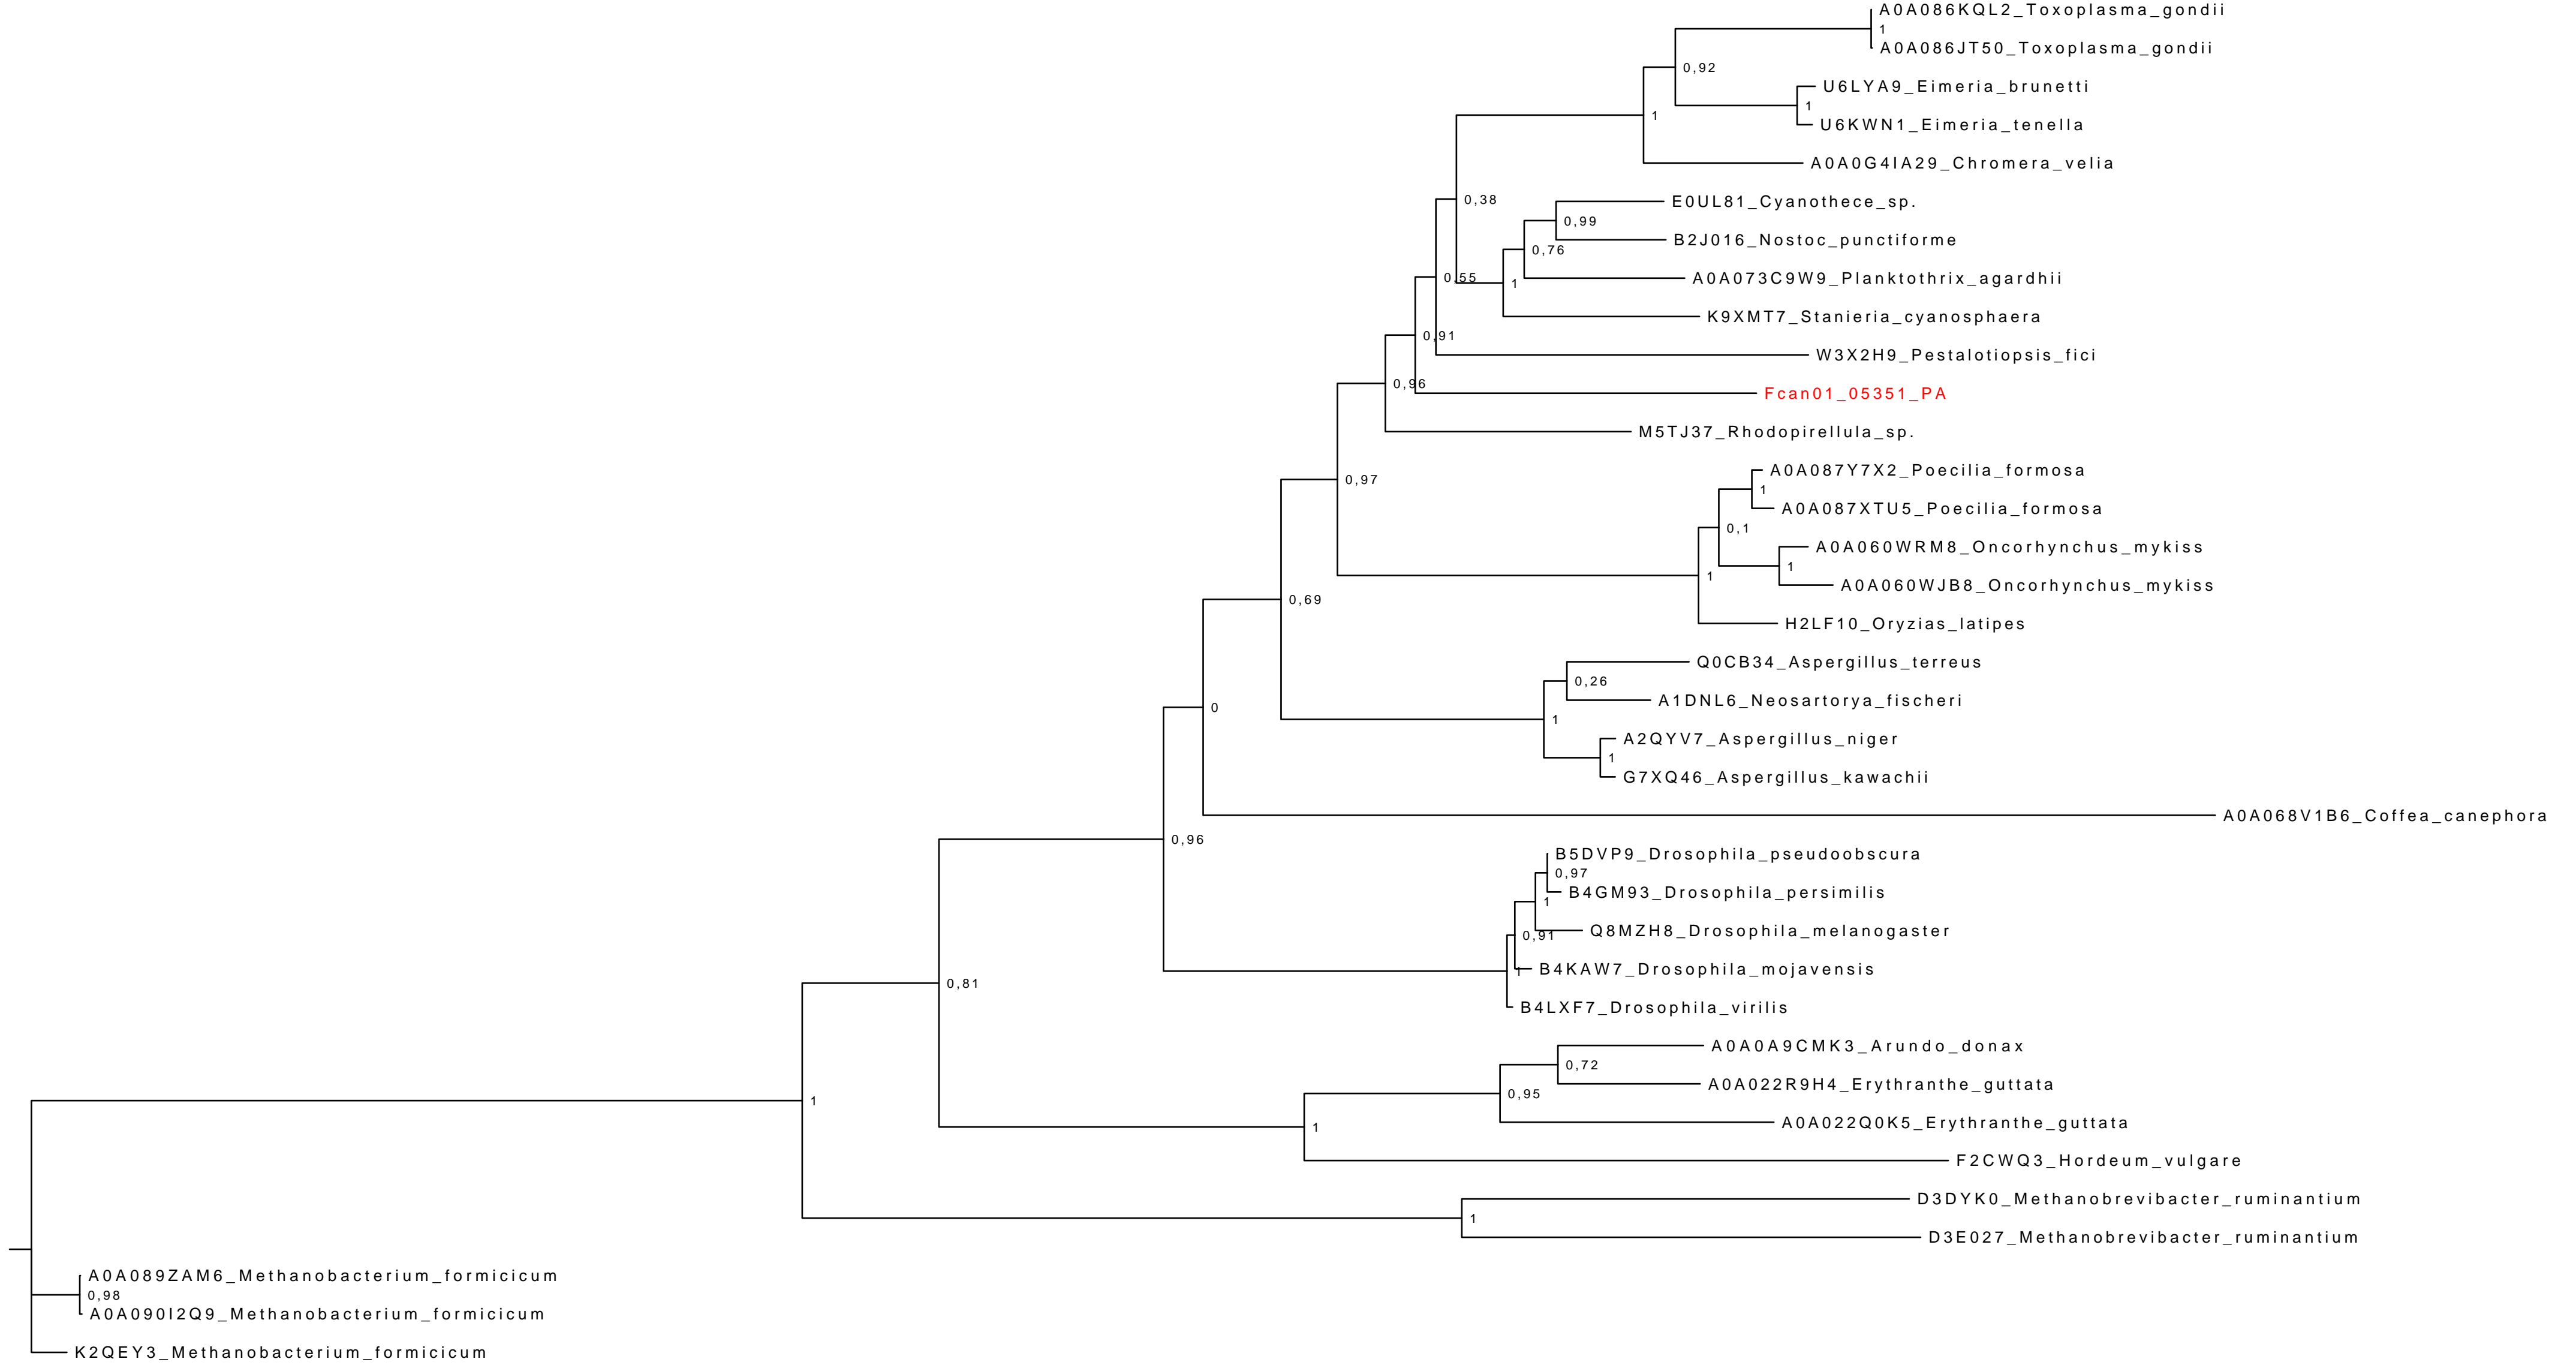

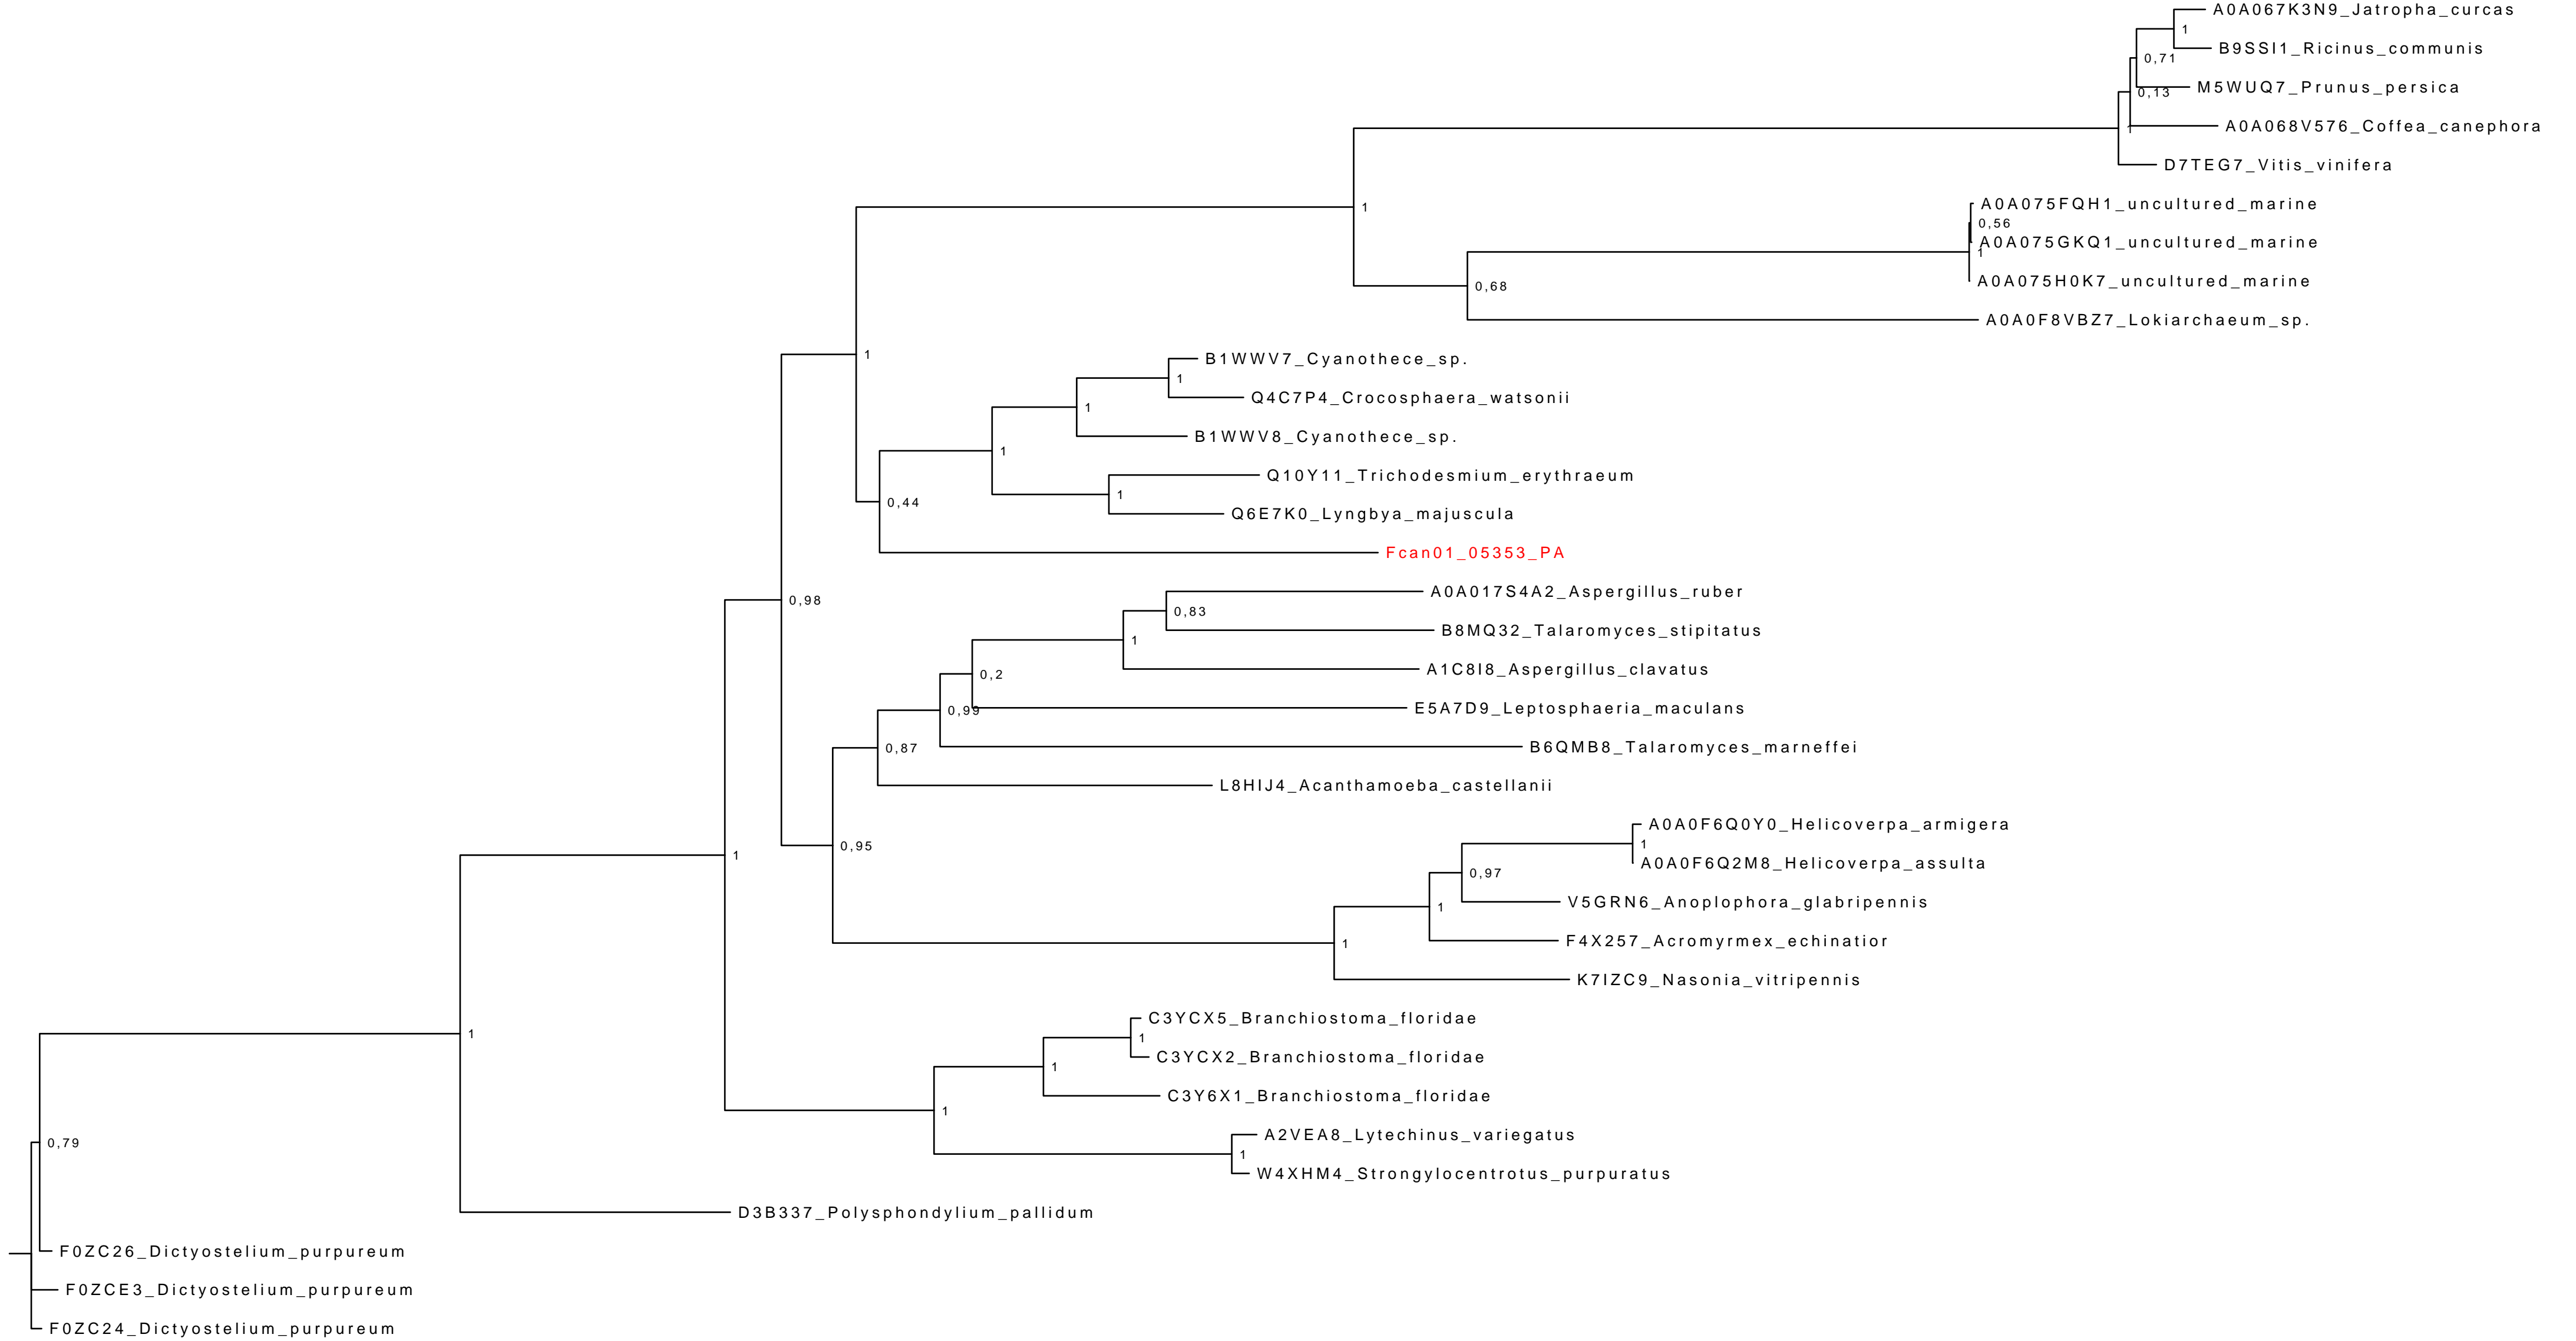

0.6

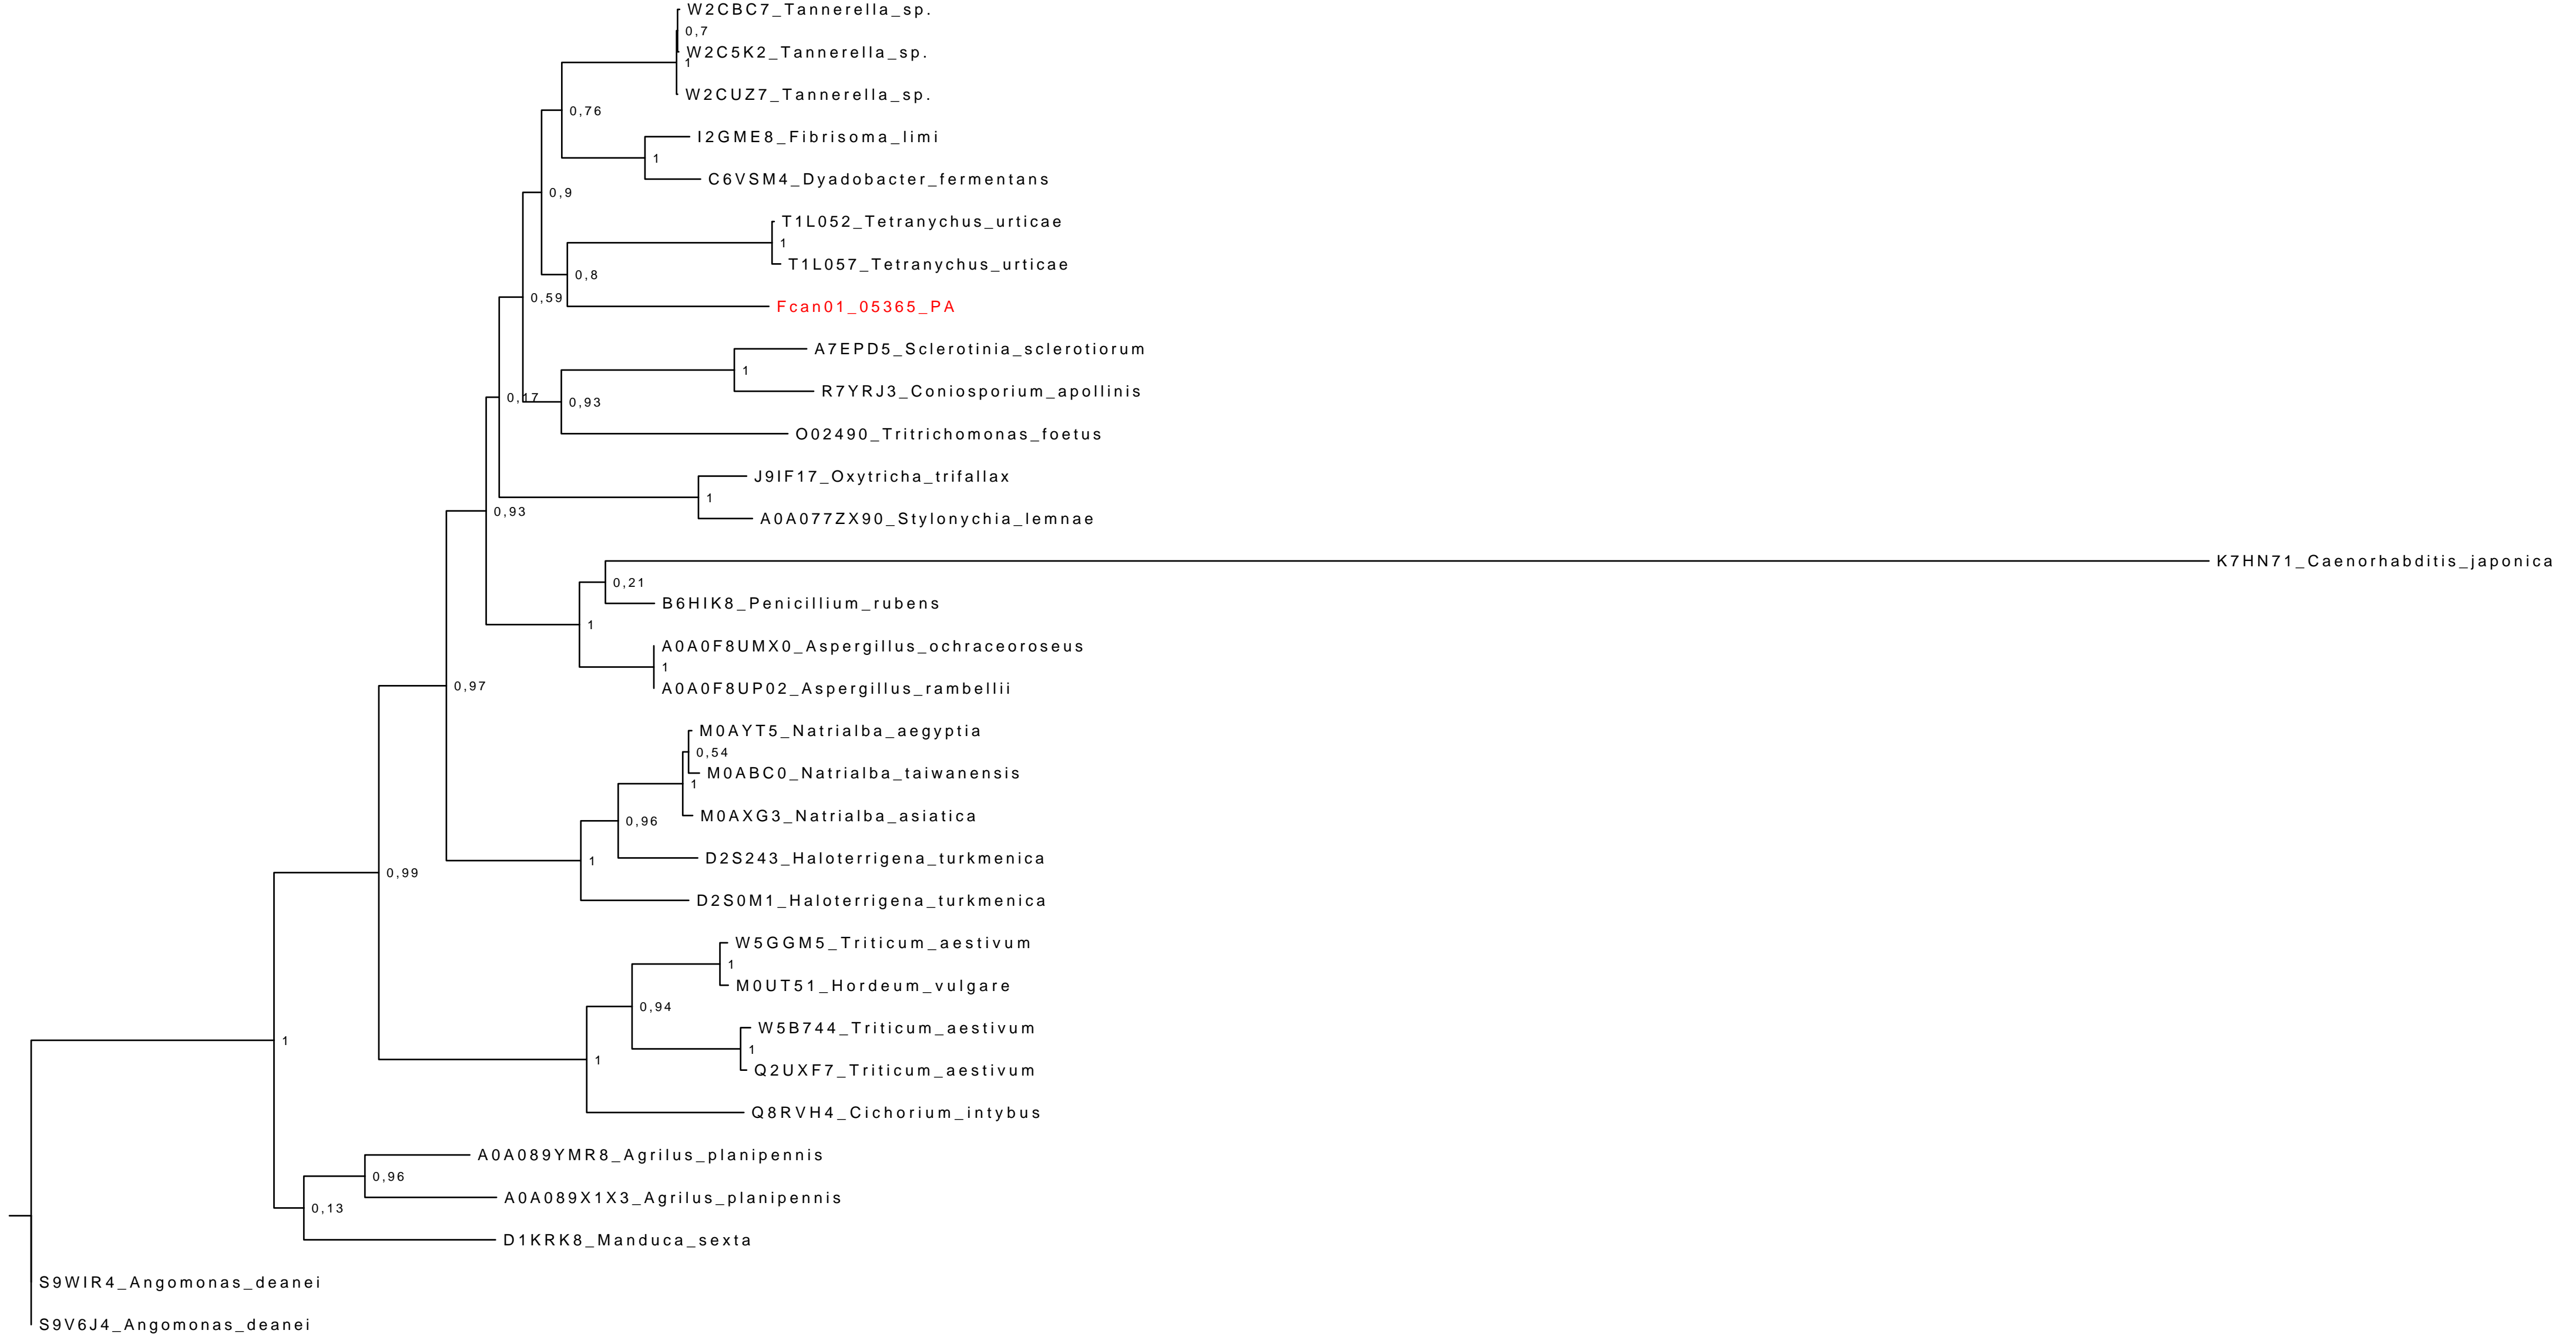

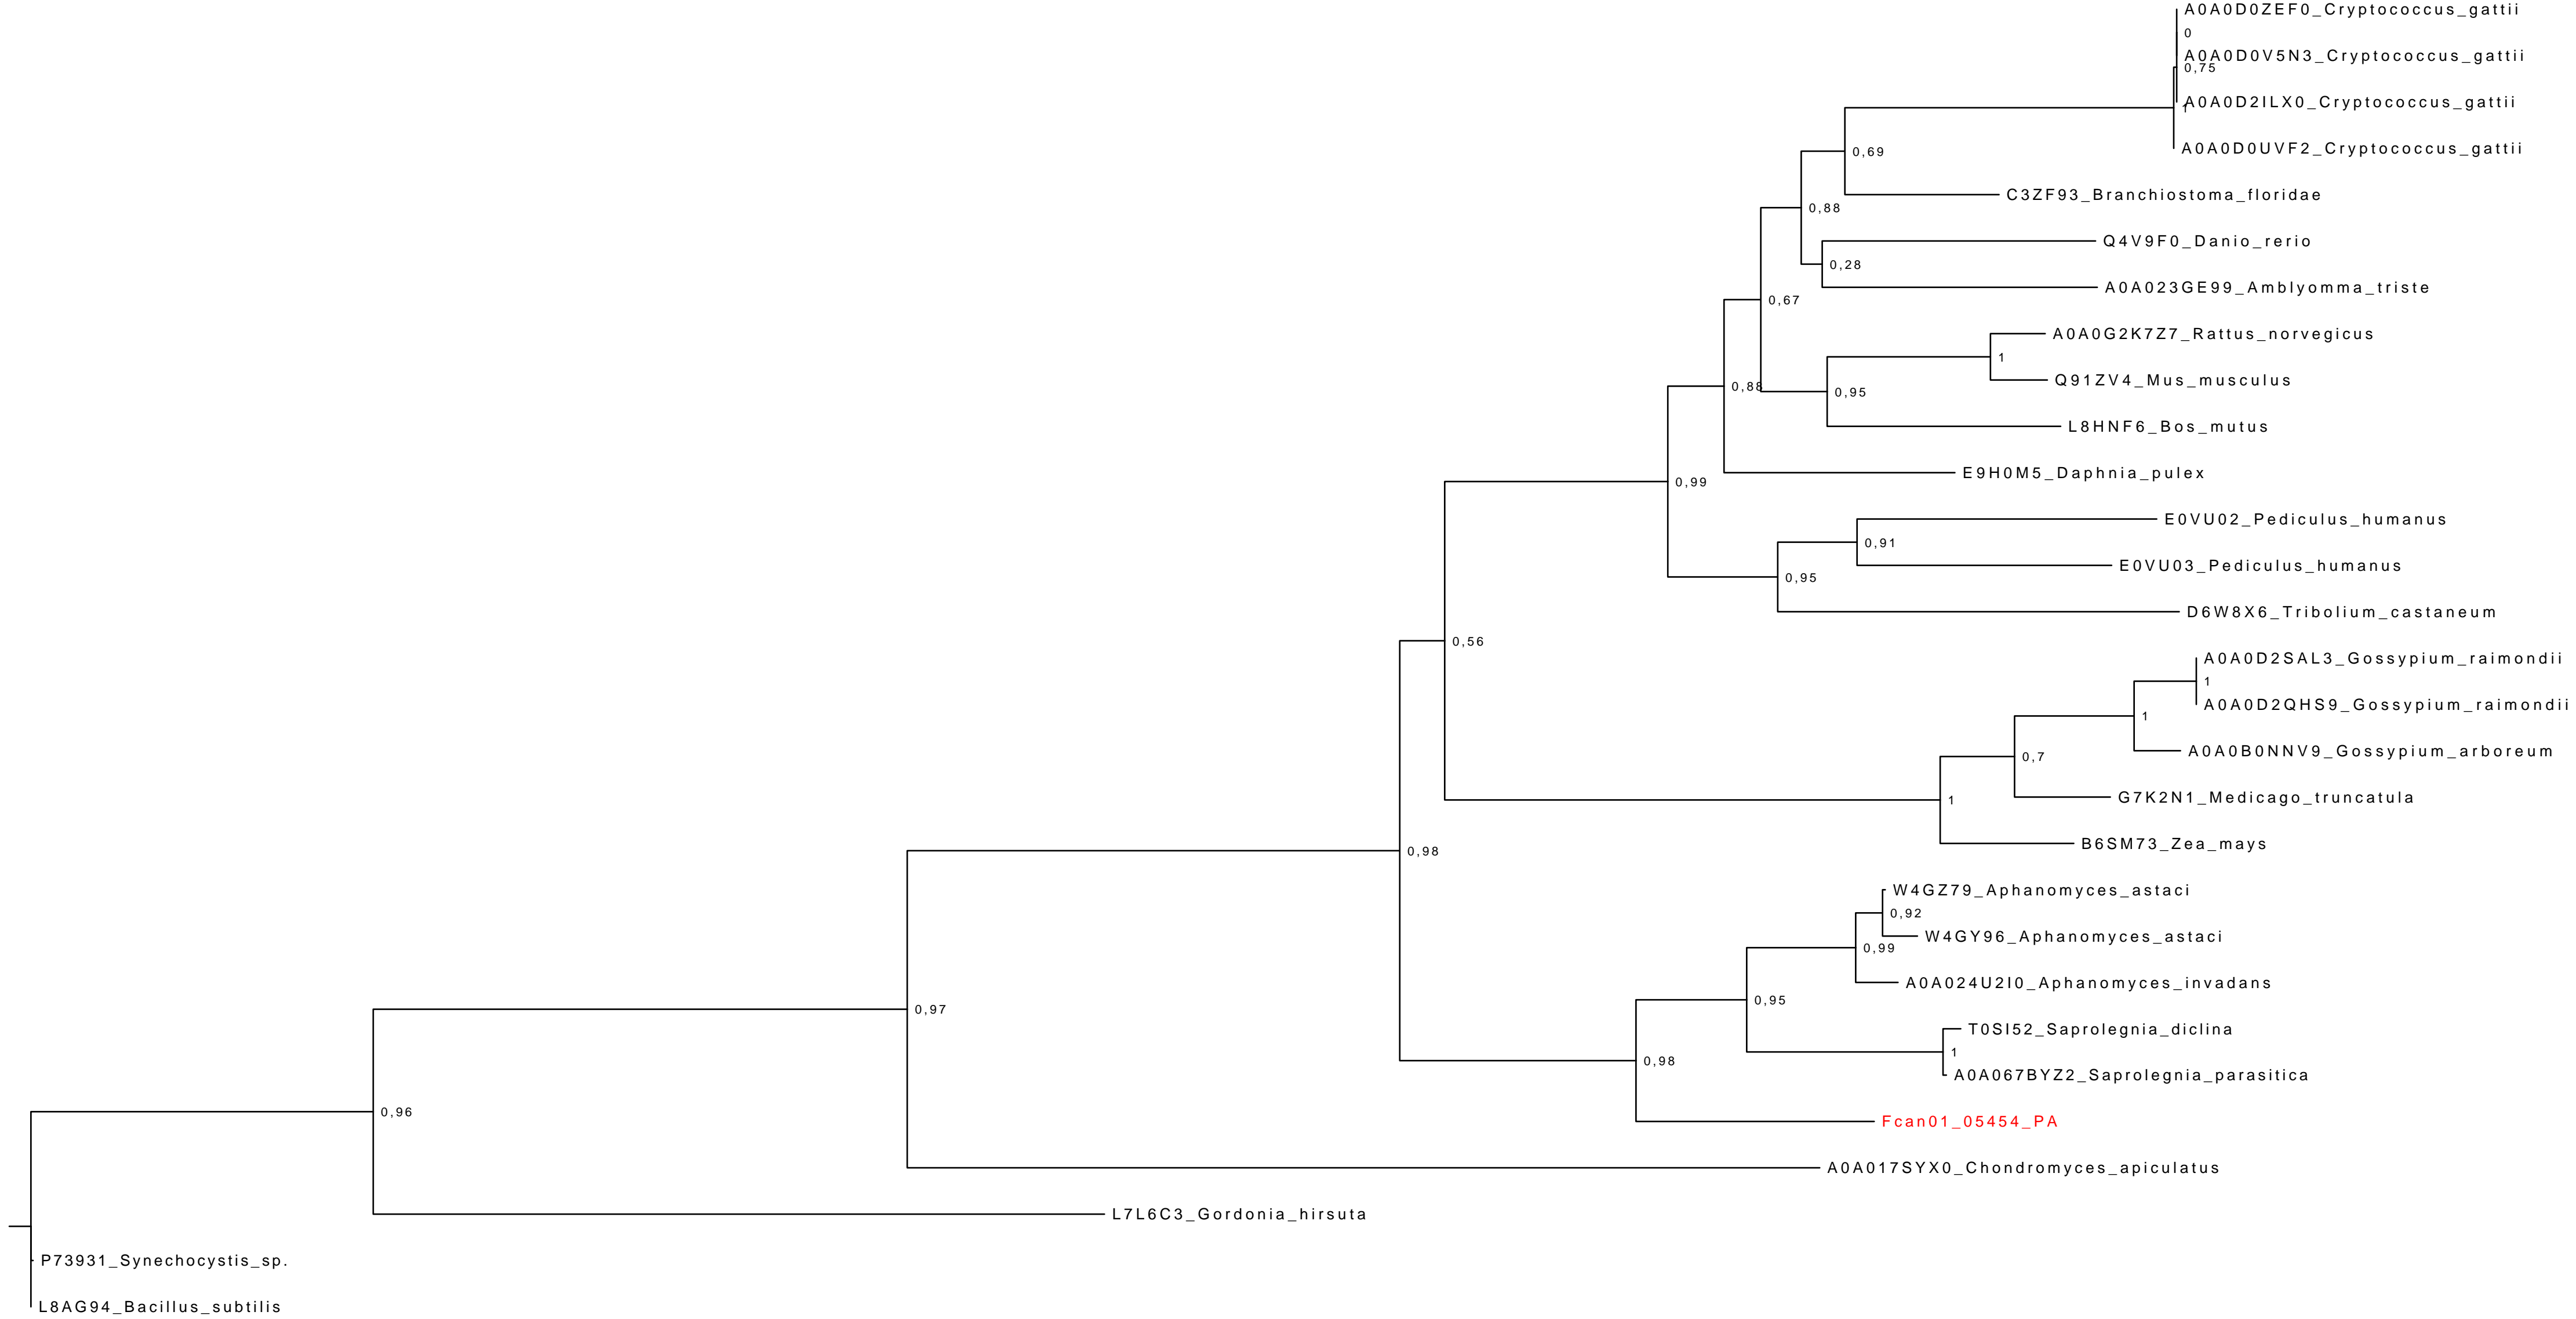

0.5

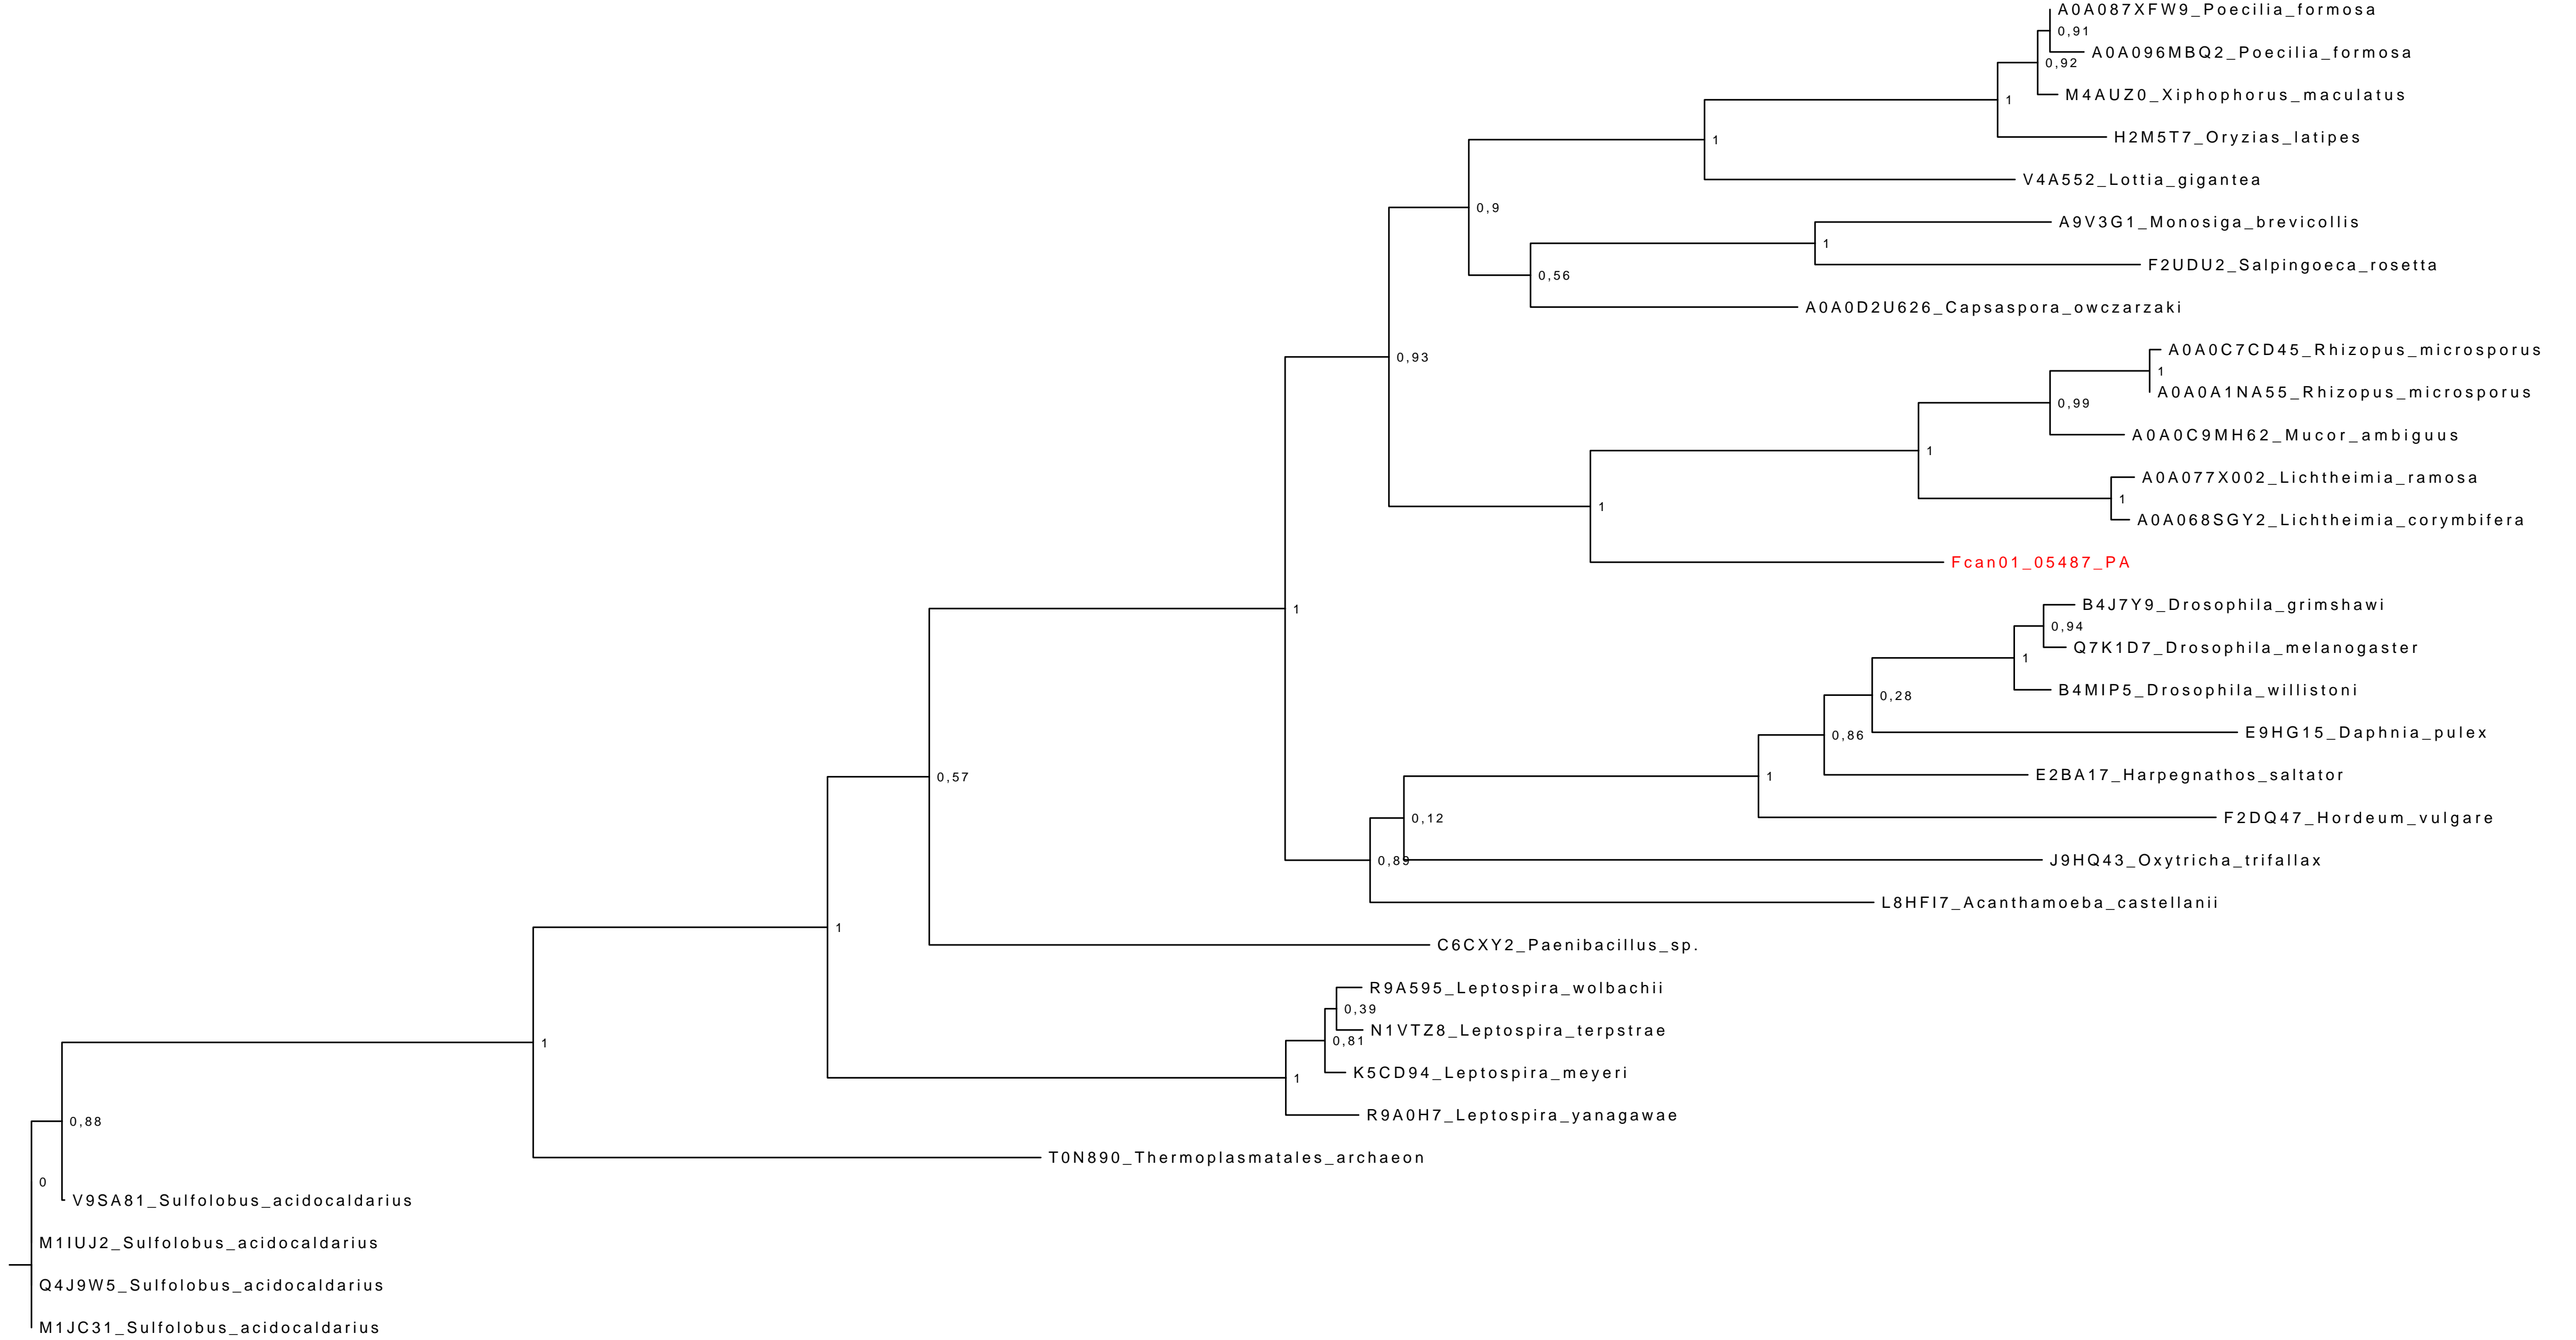

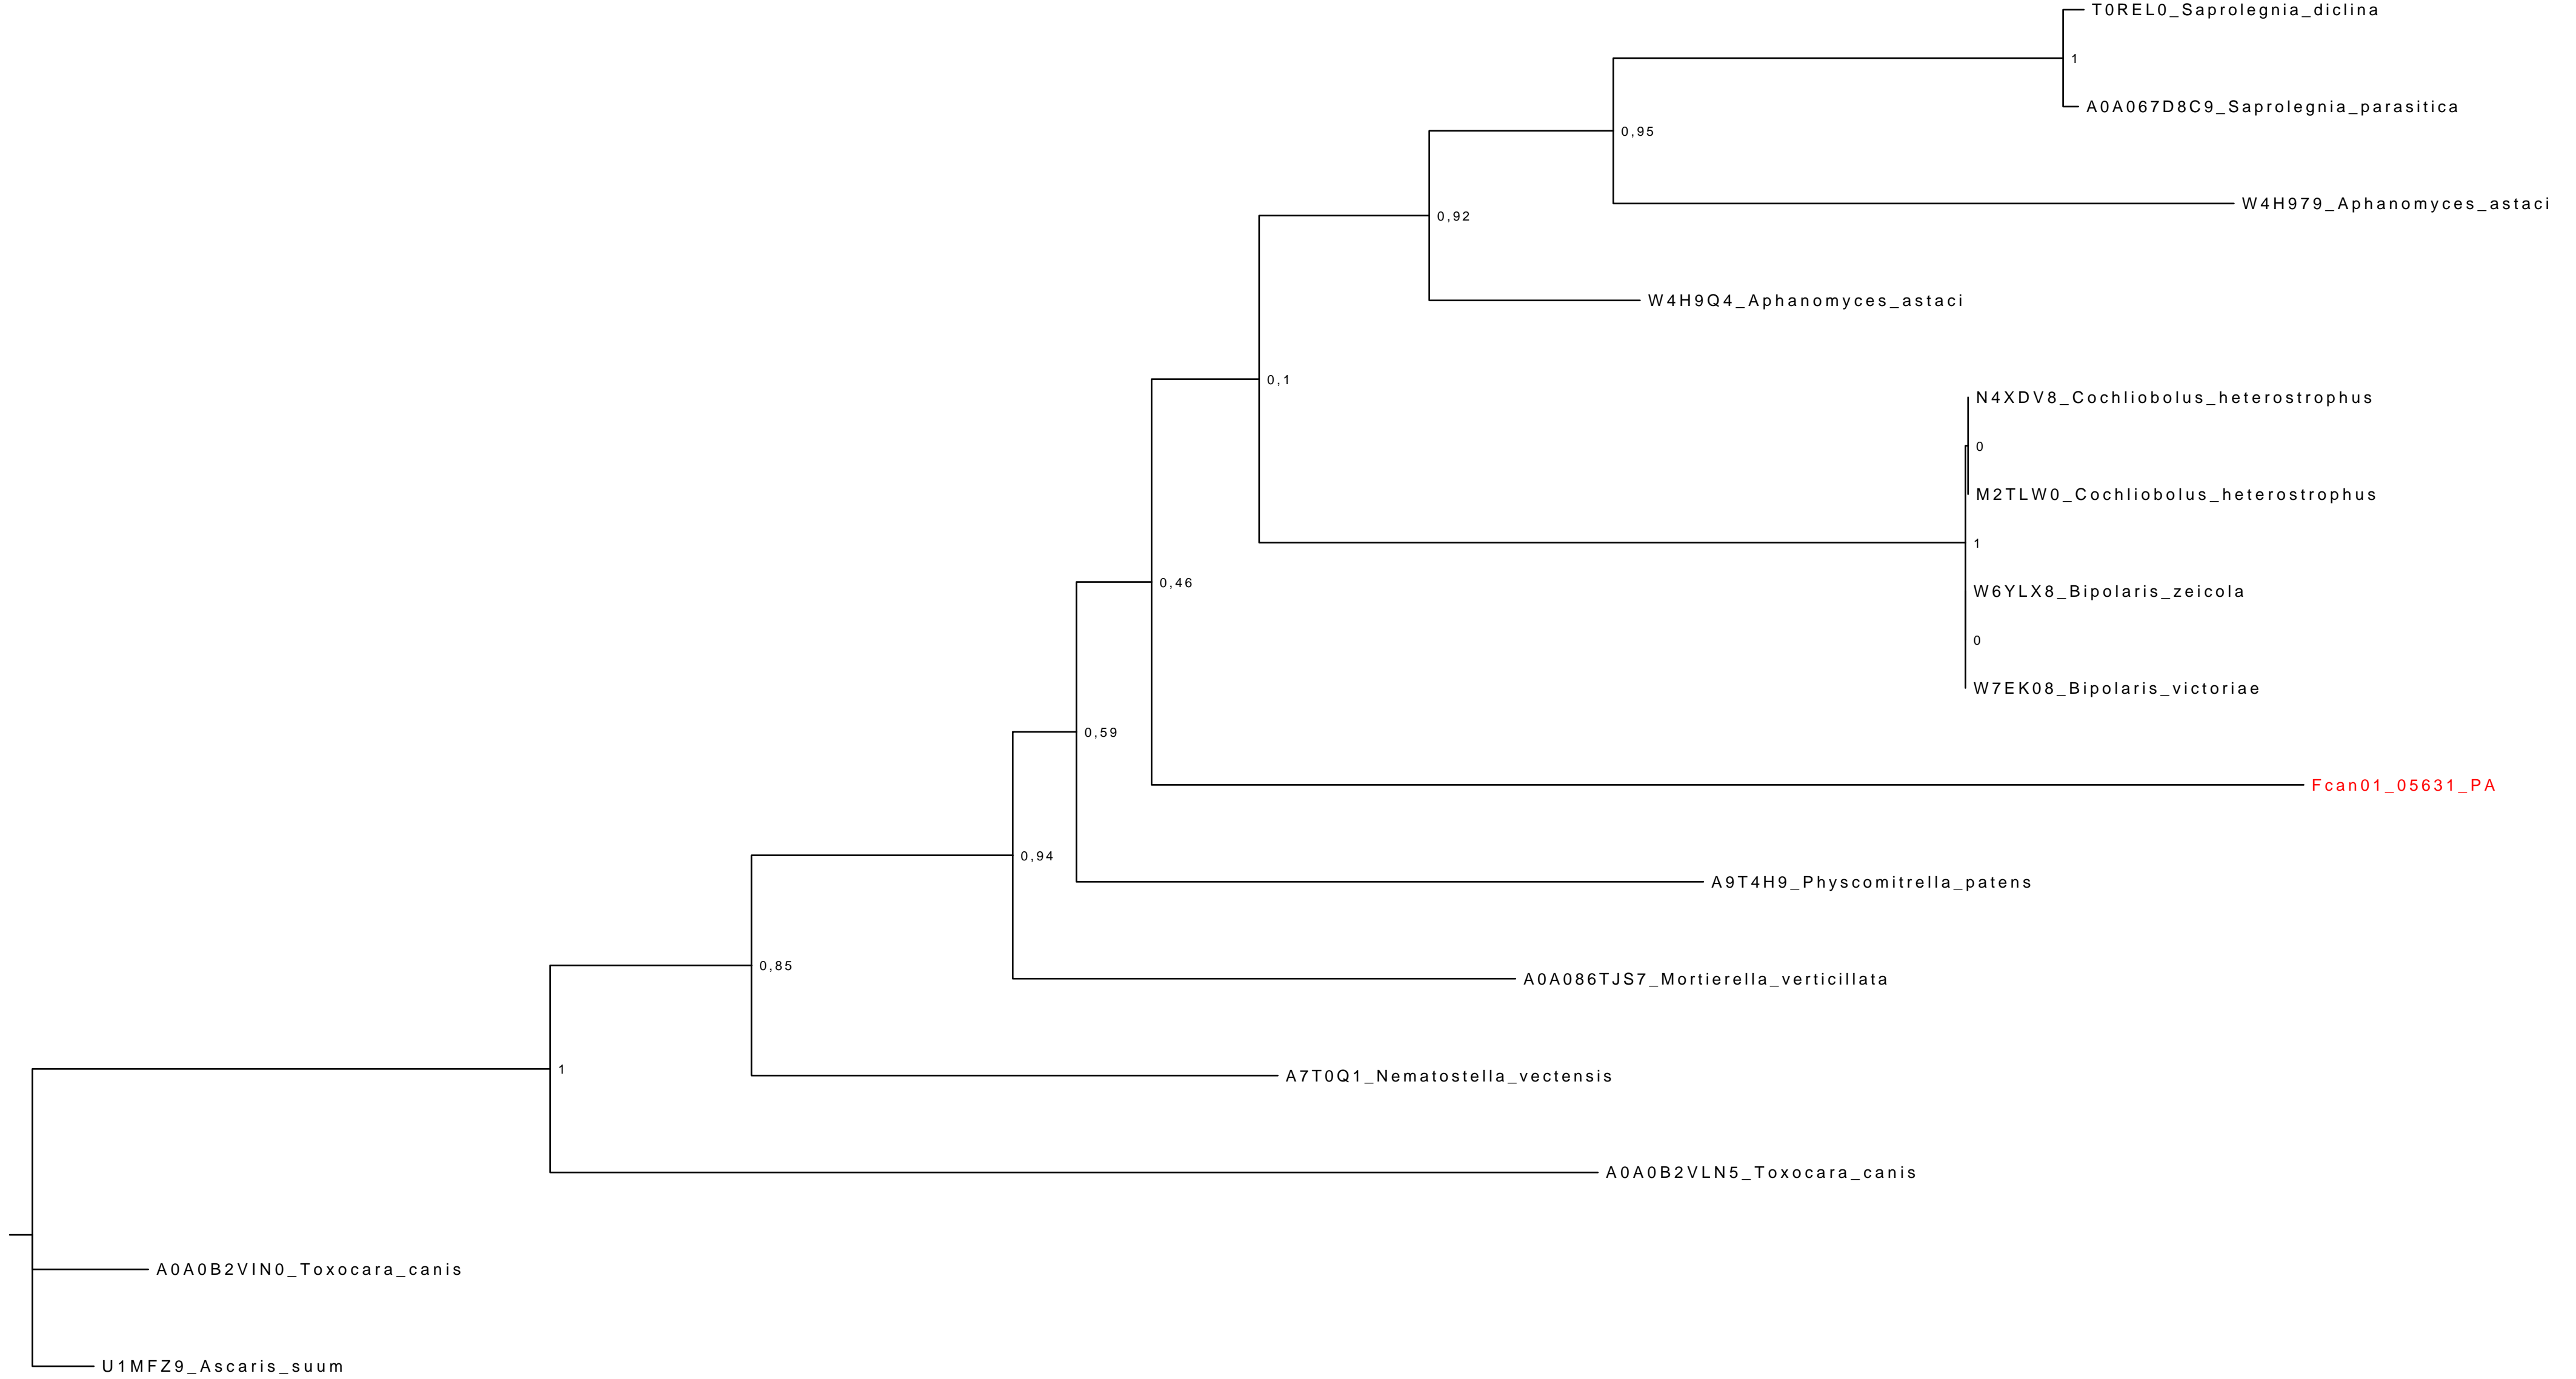

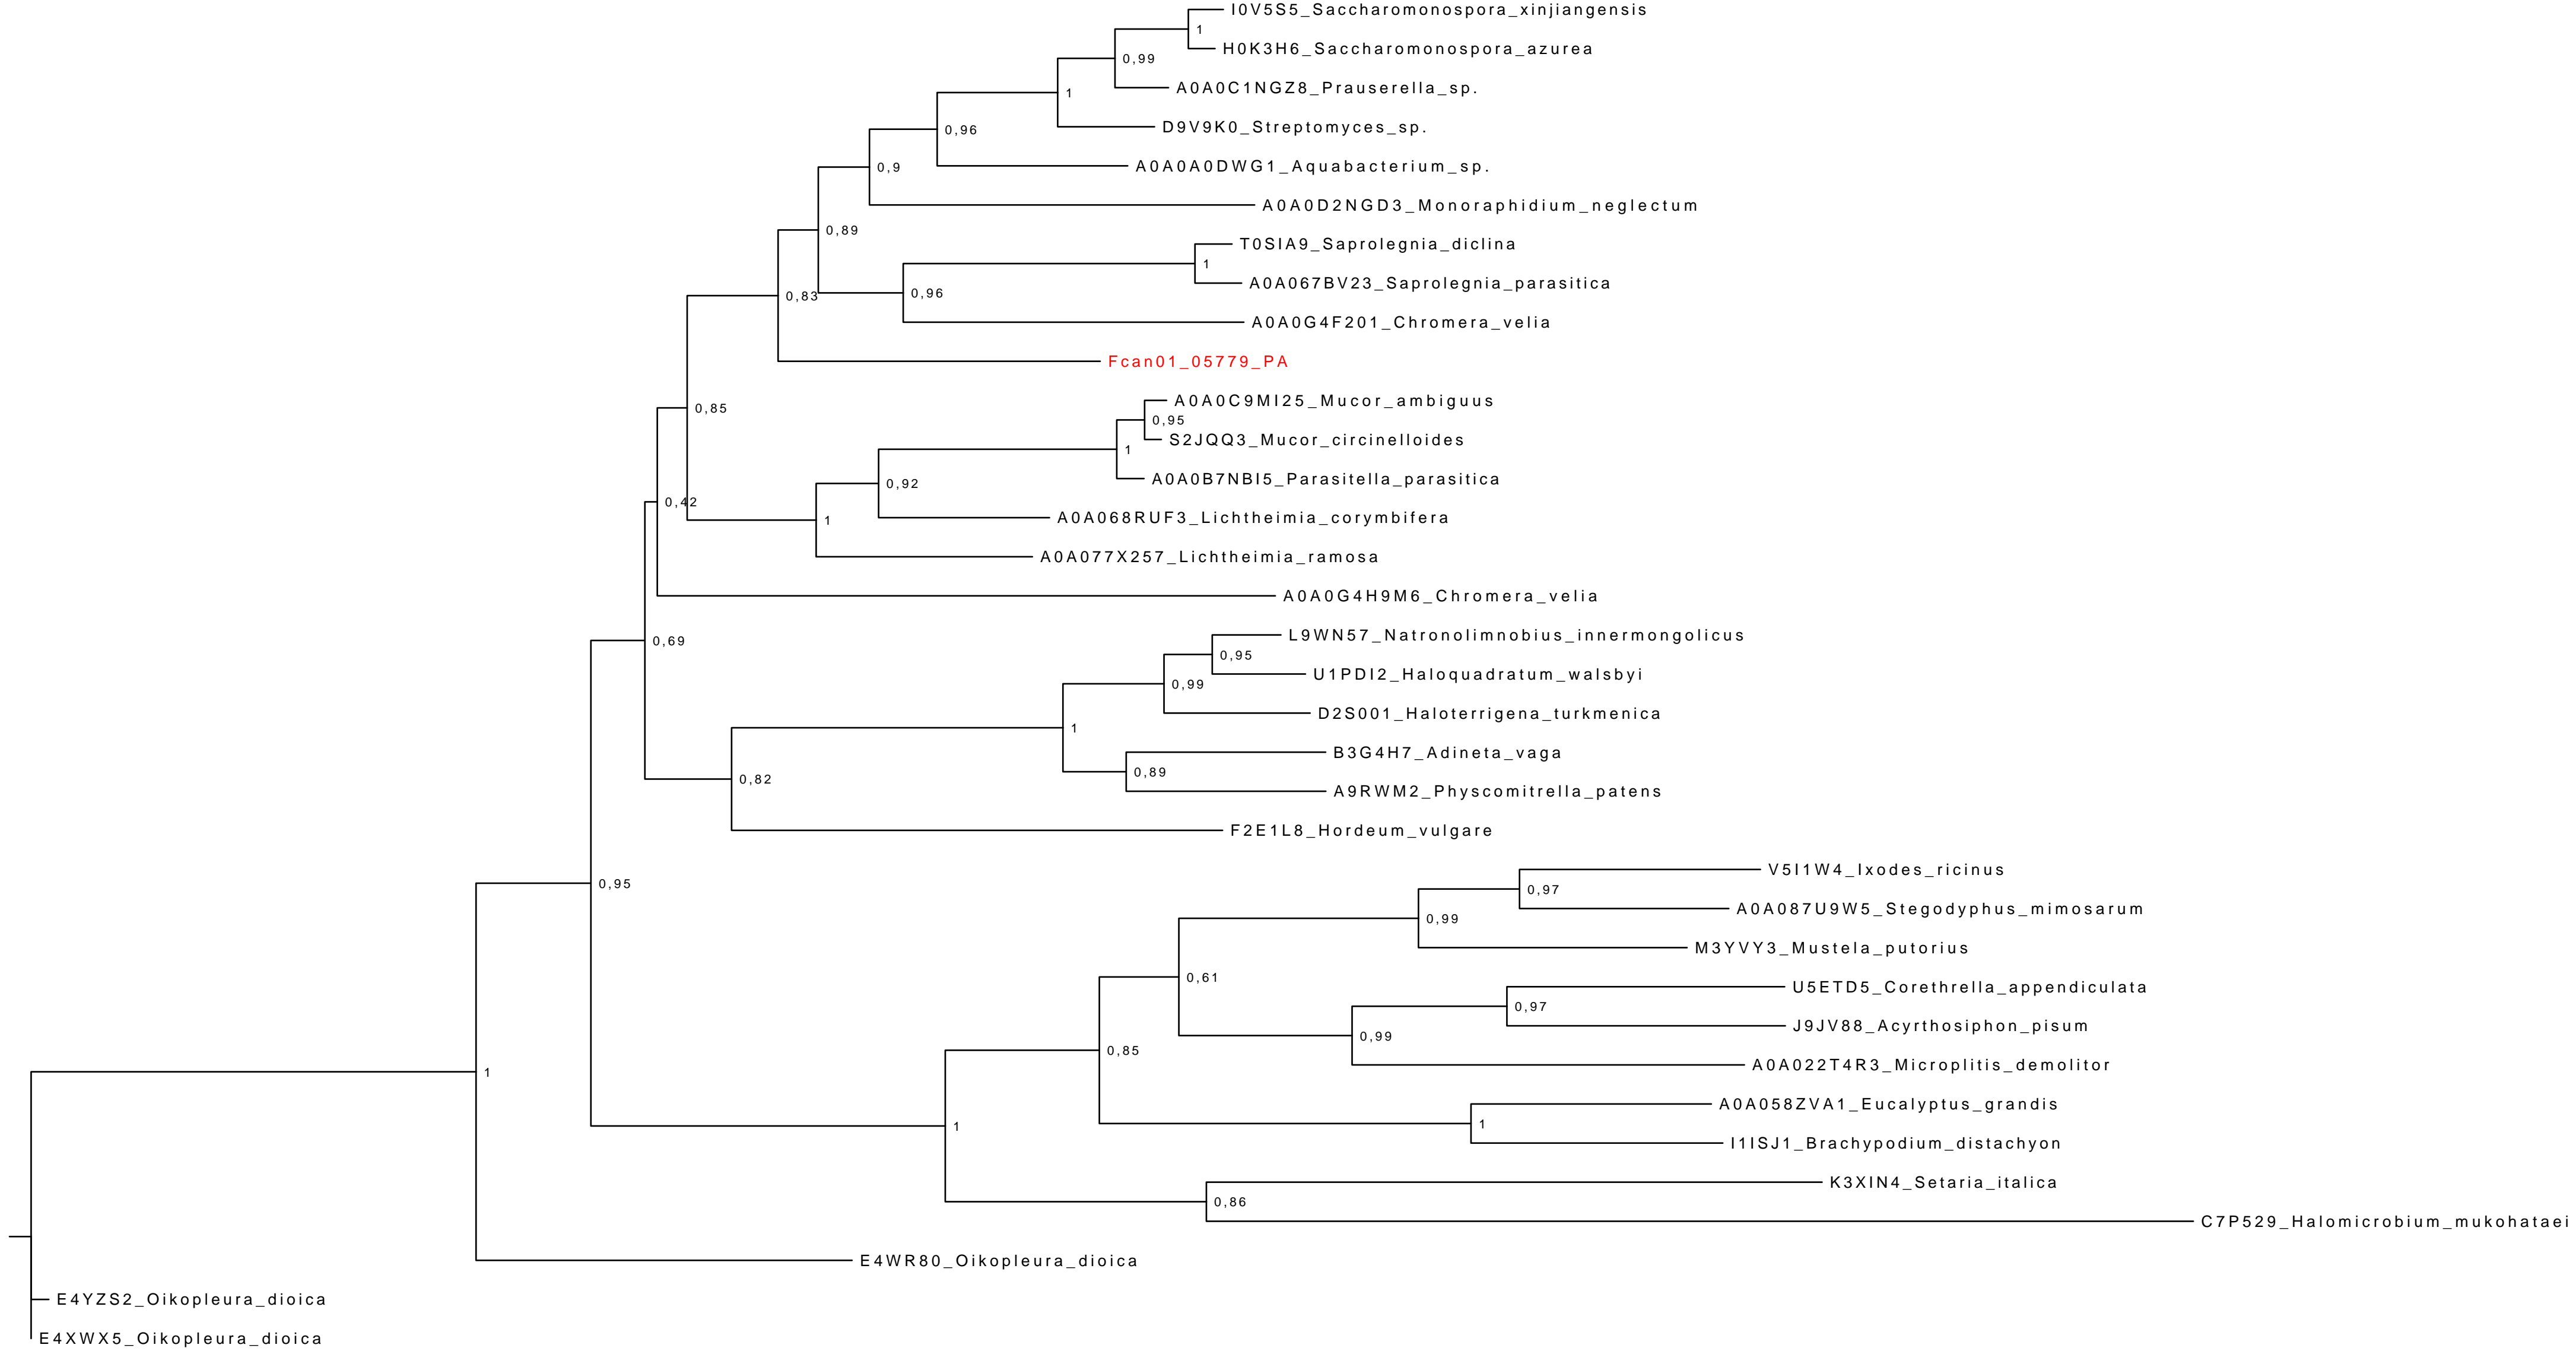

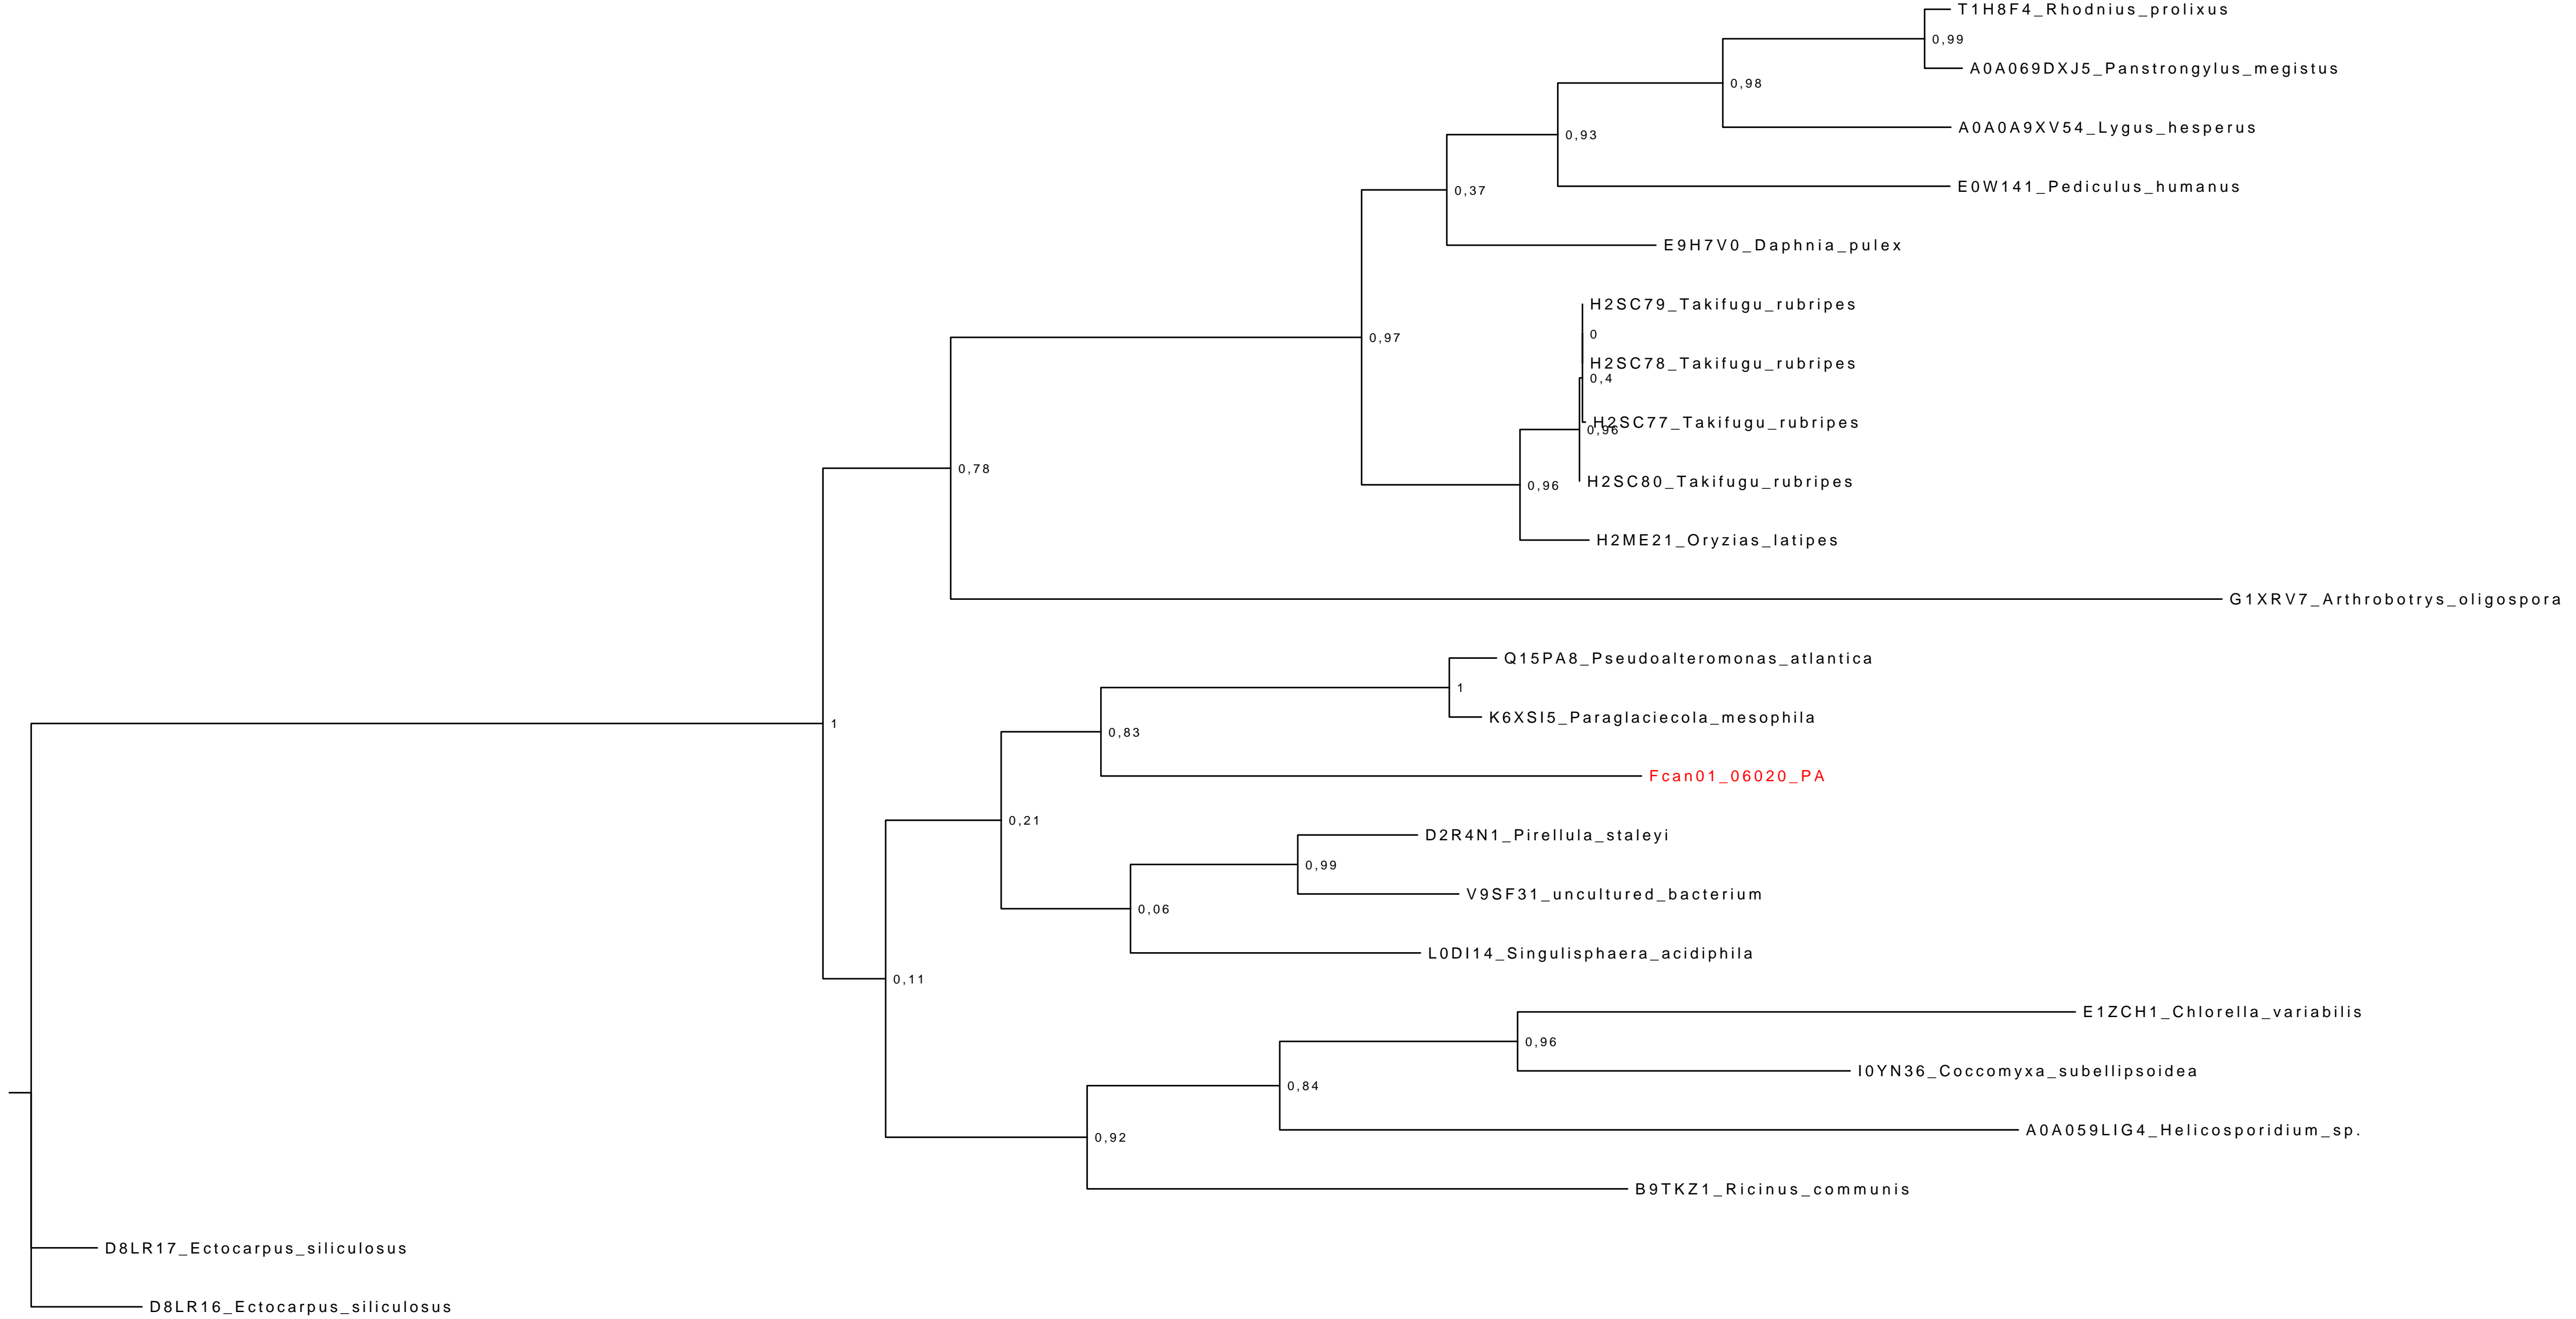

0.4



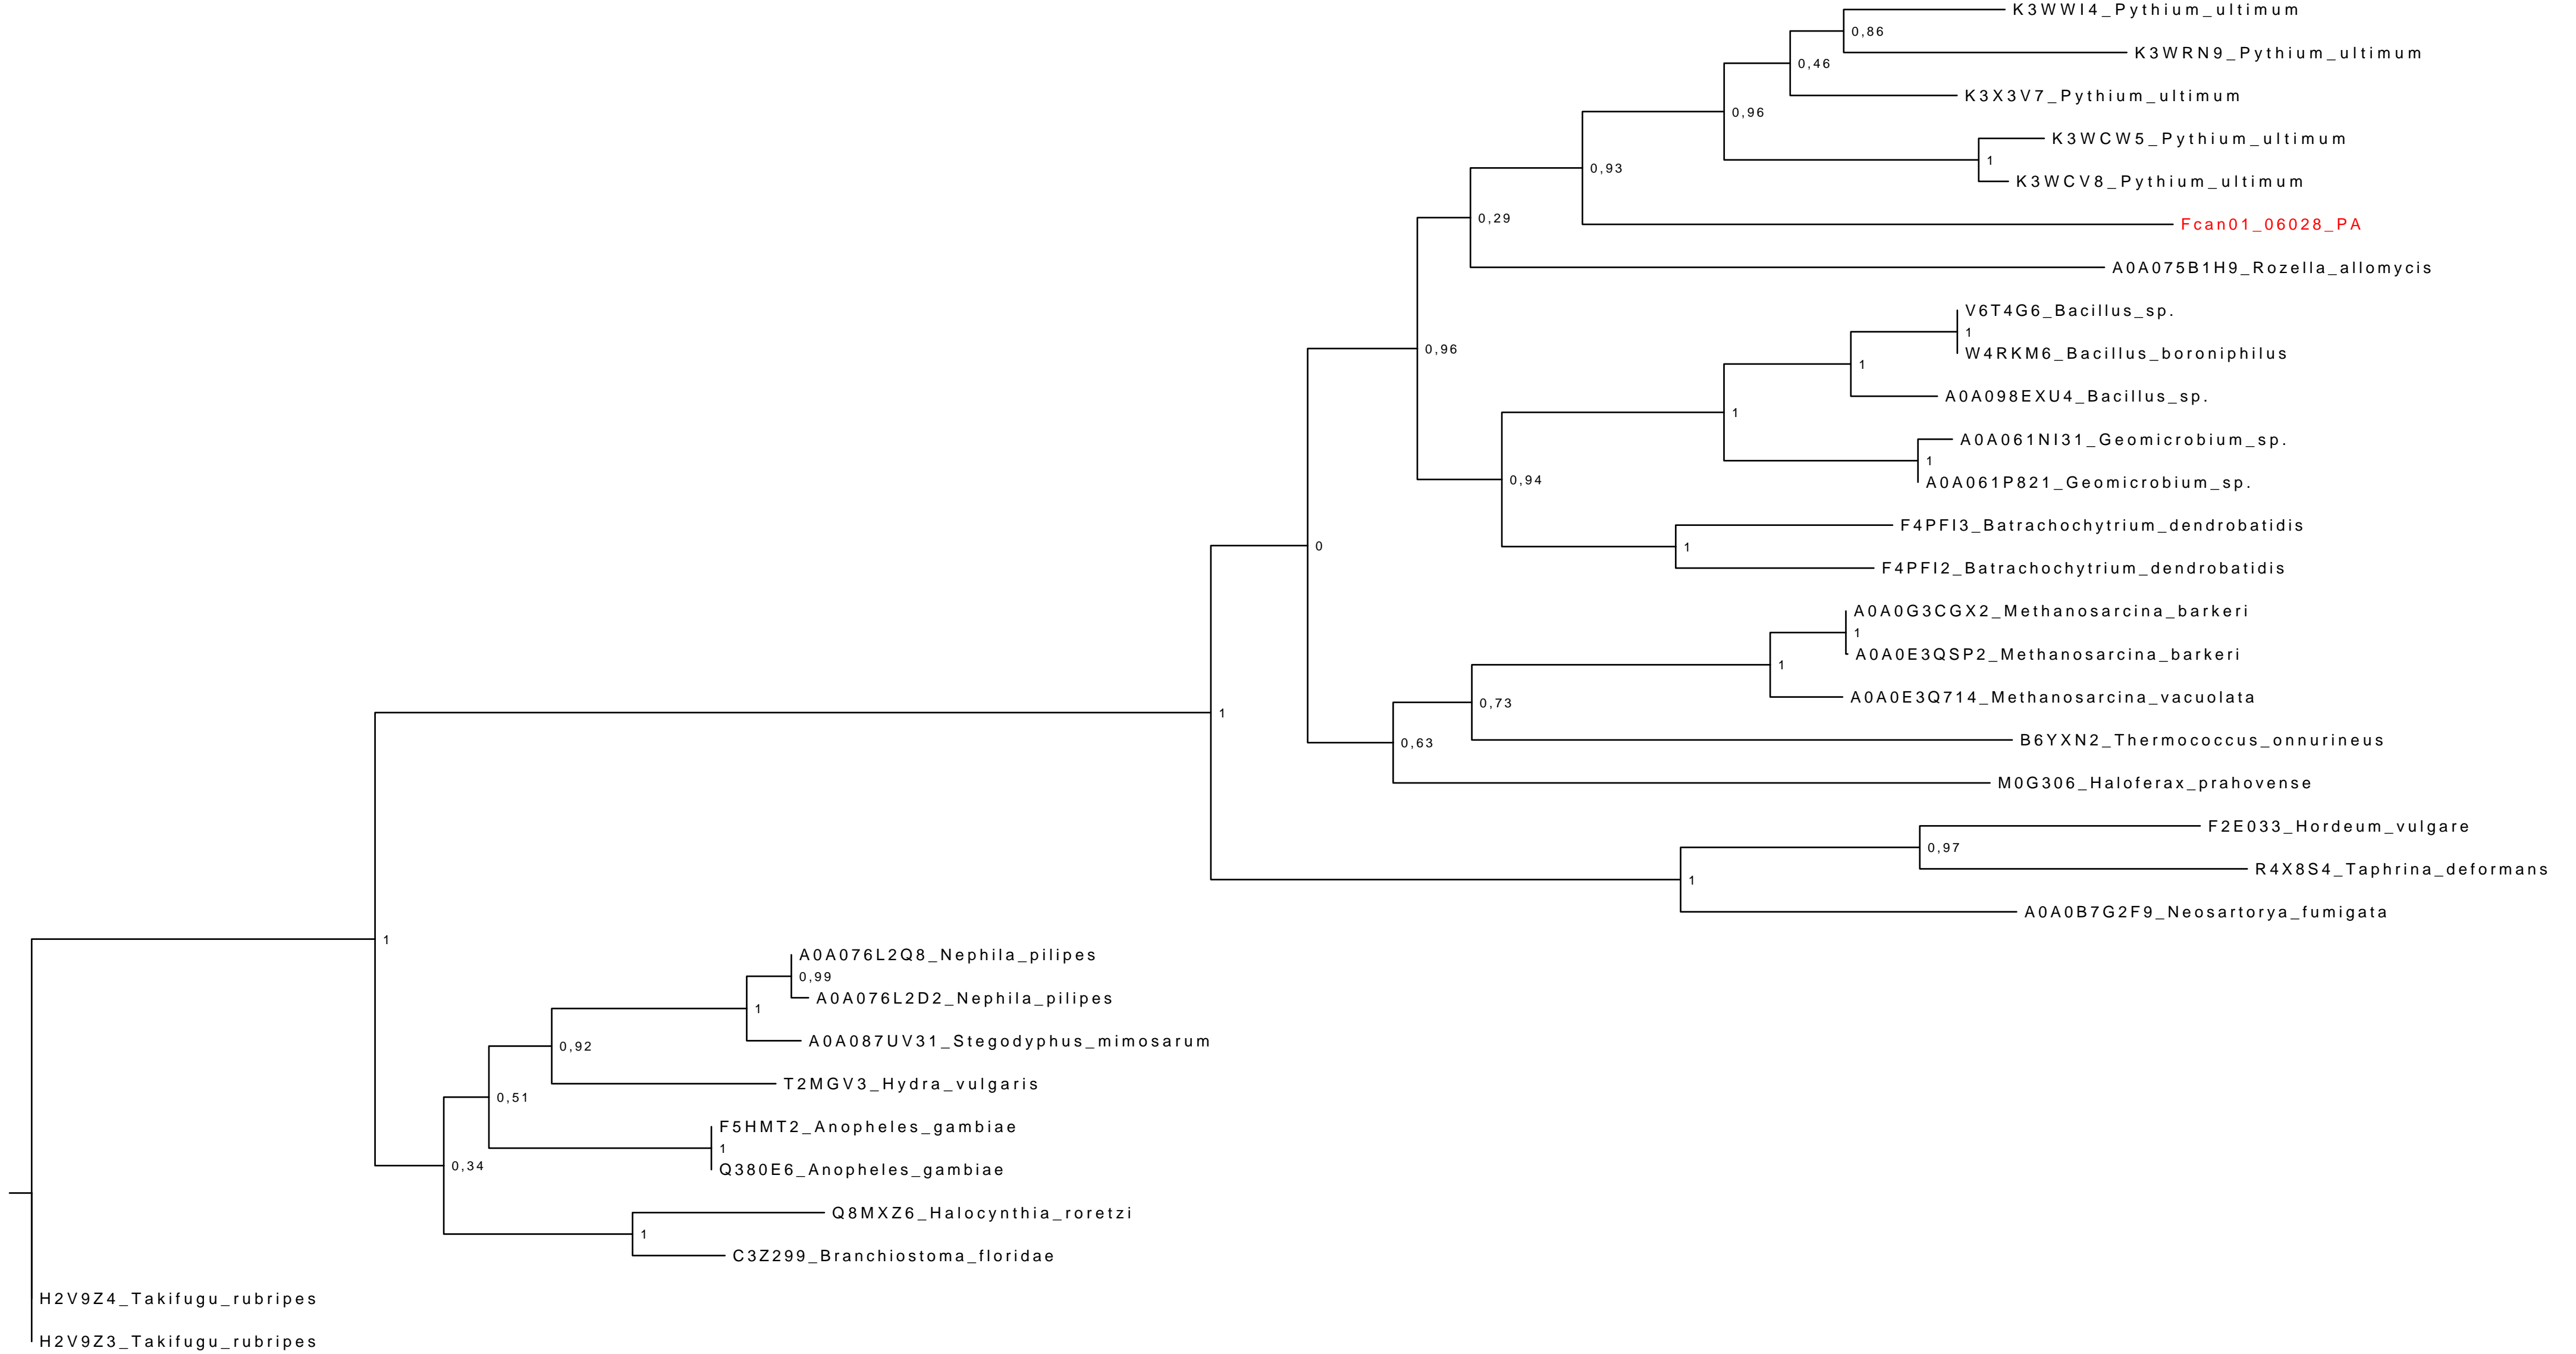

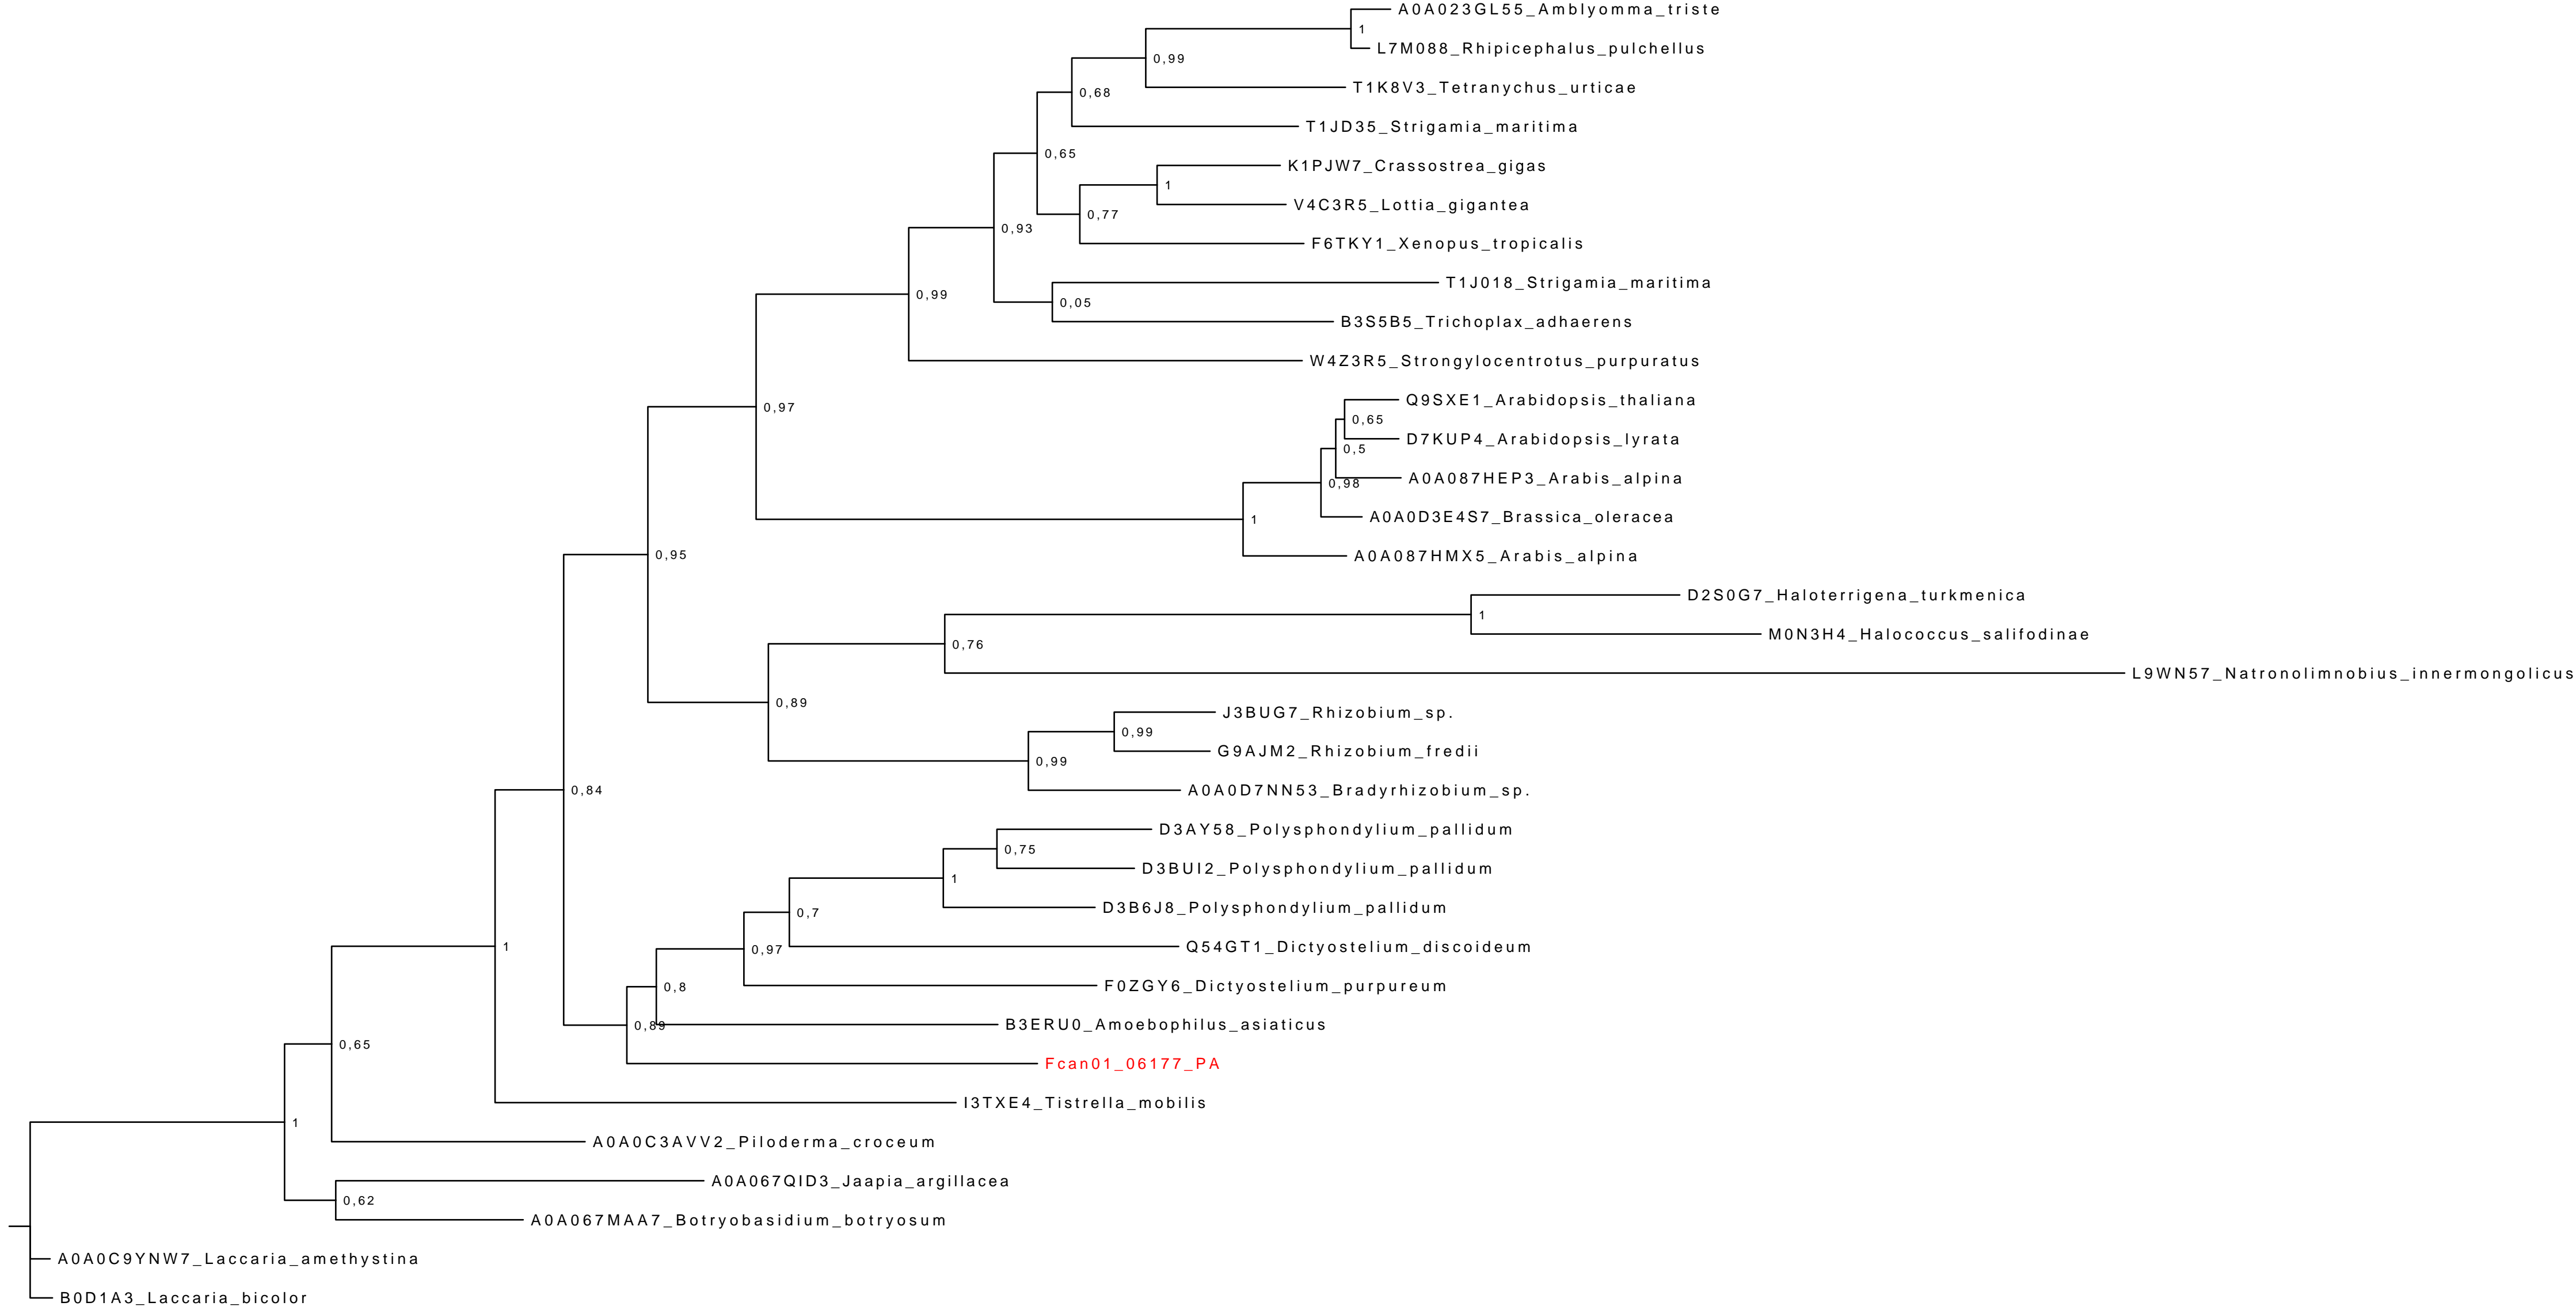

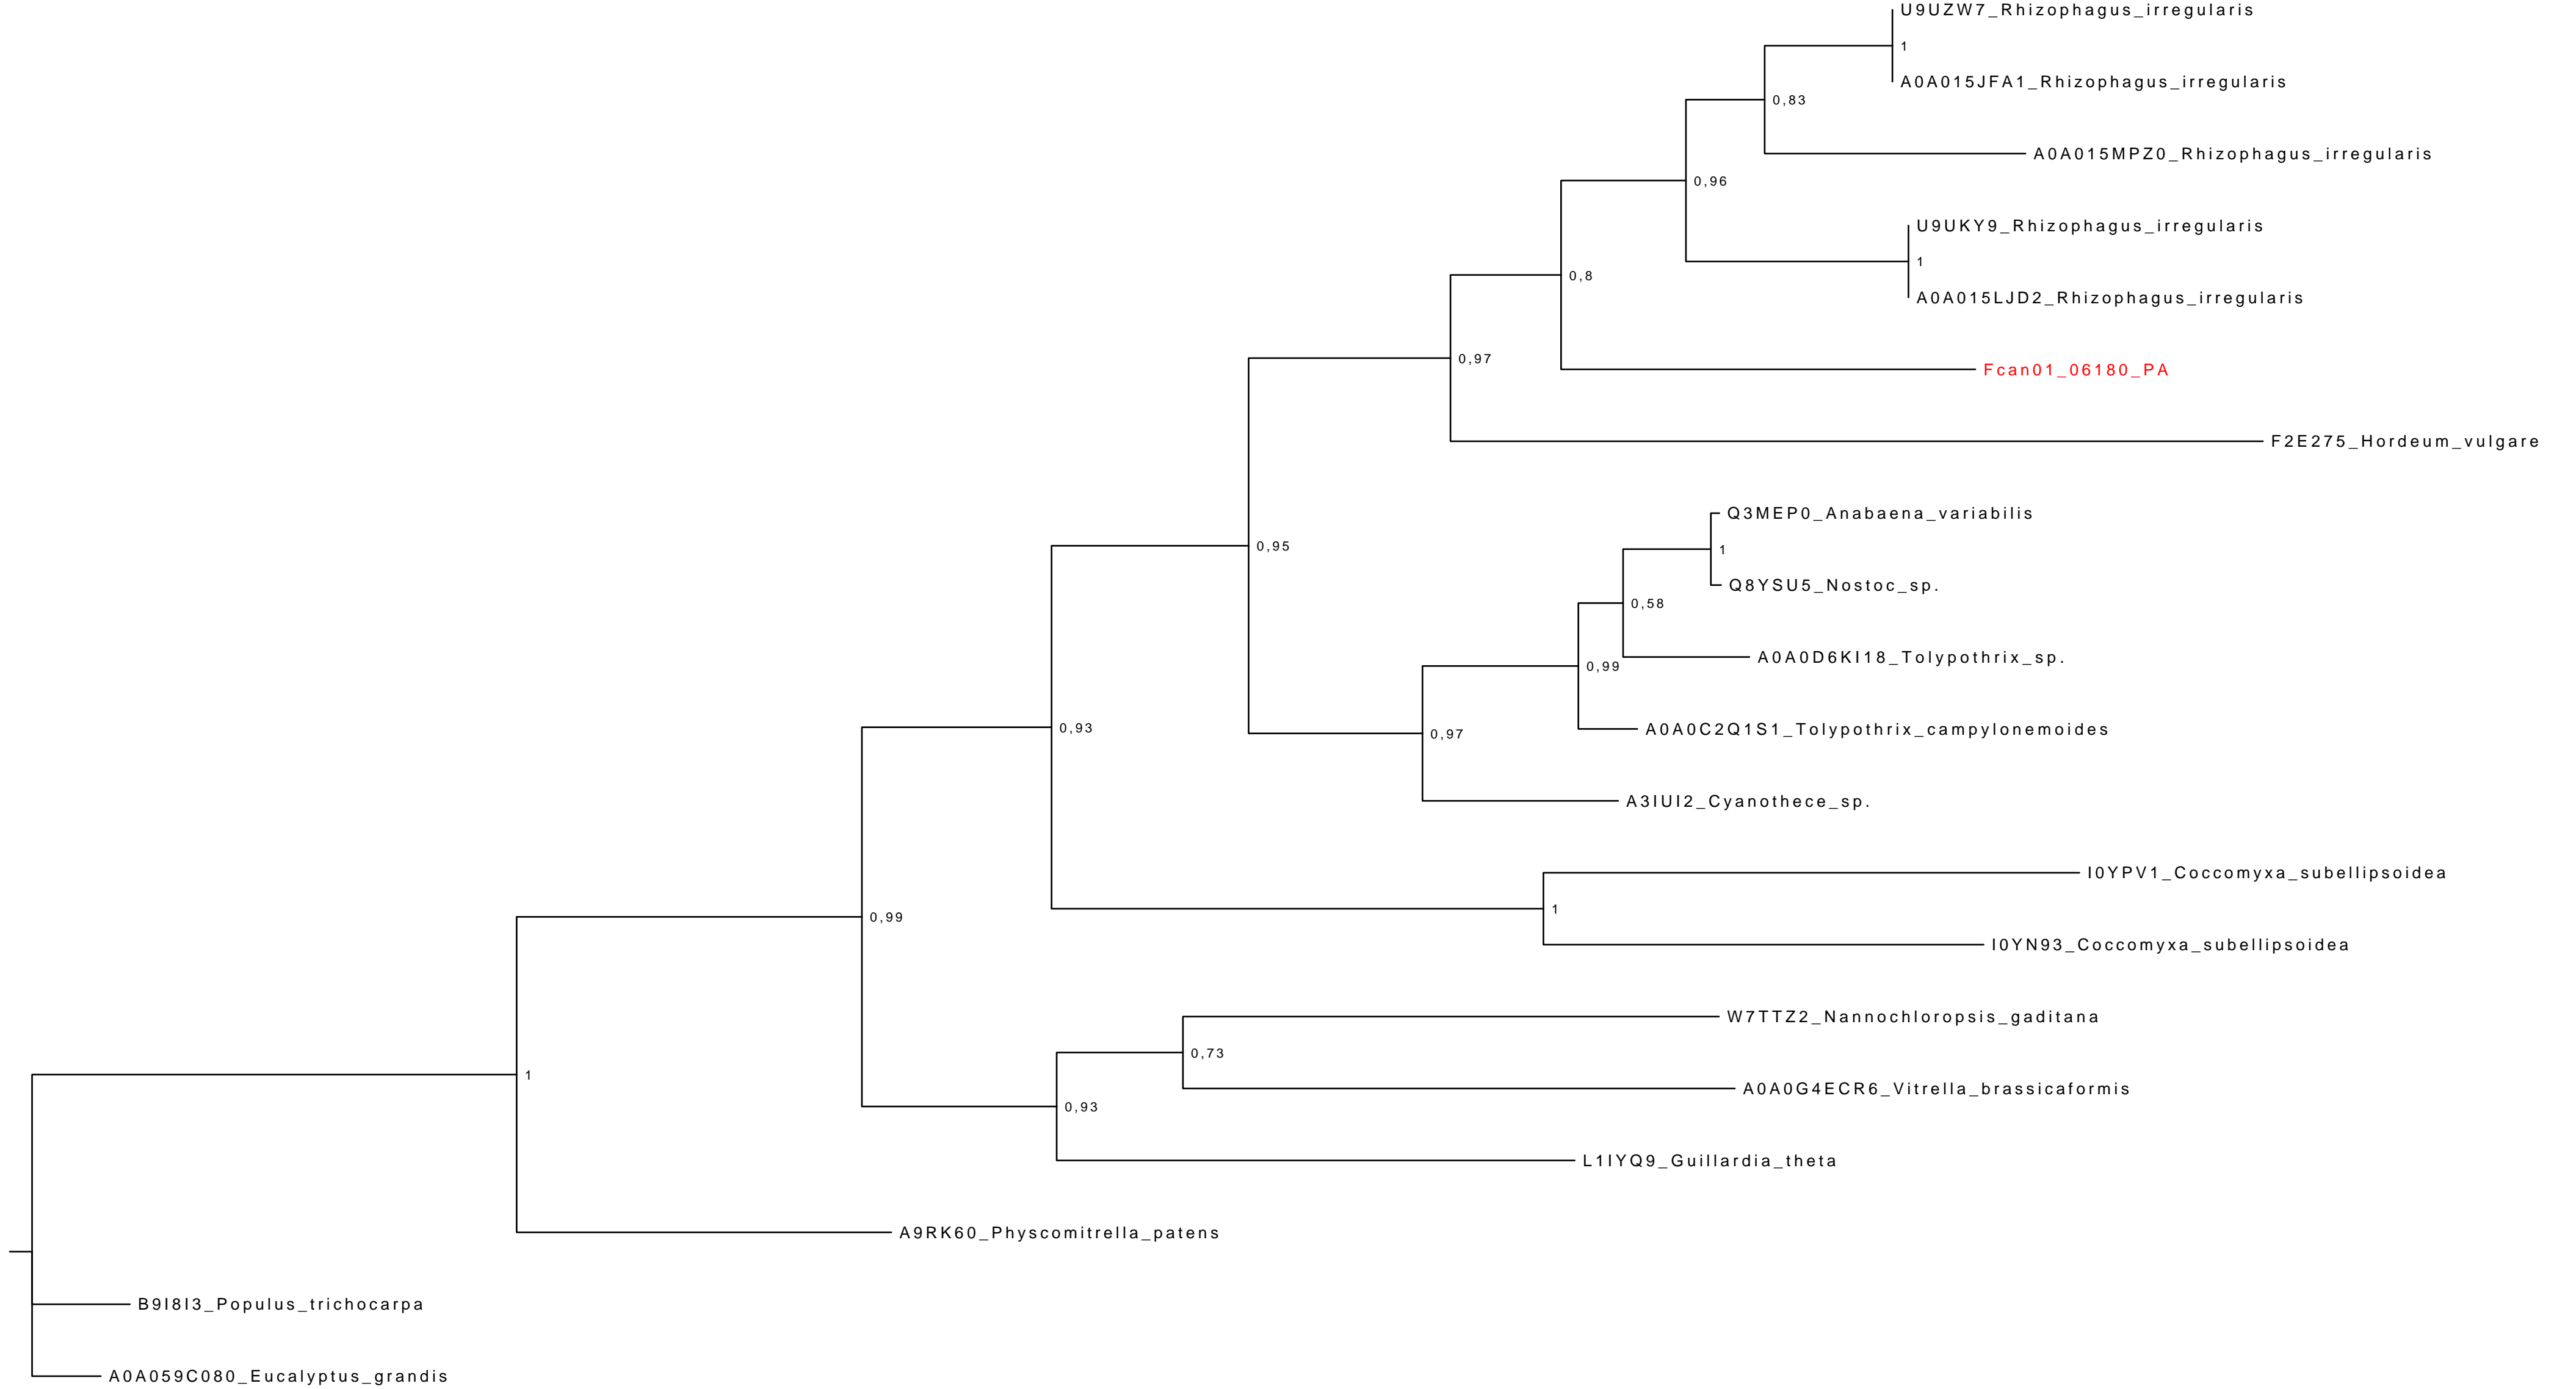

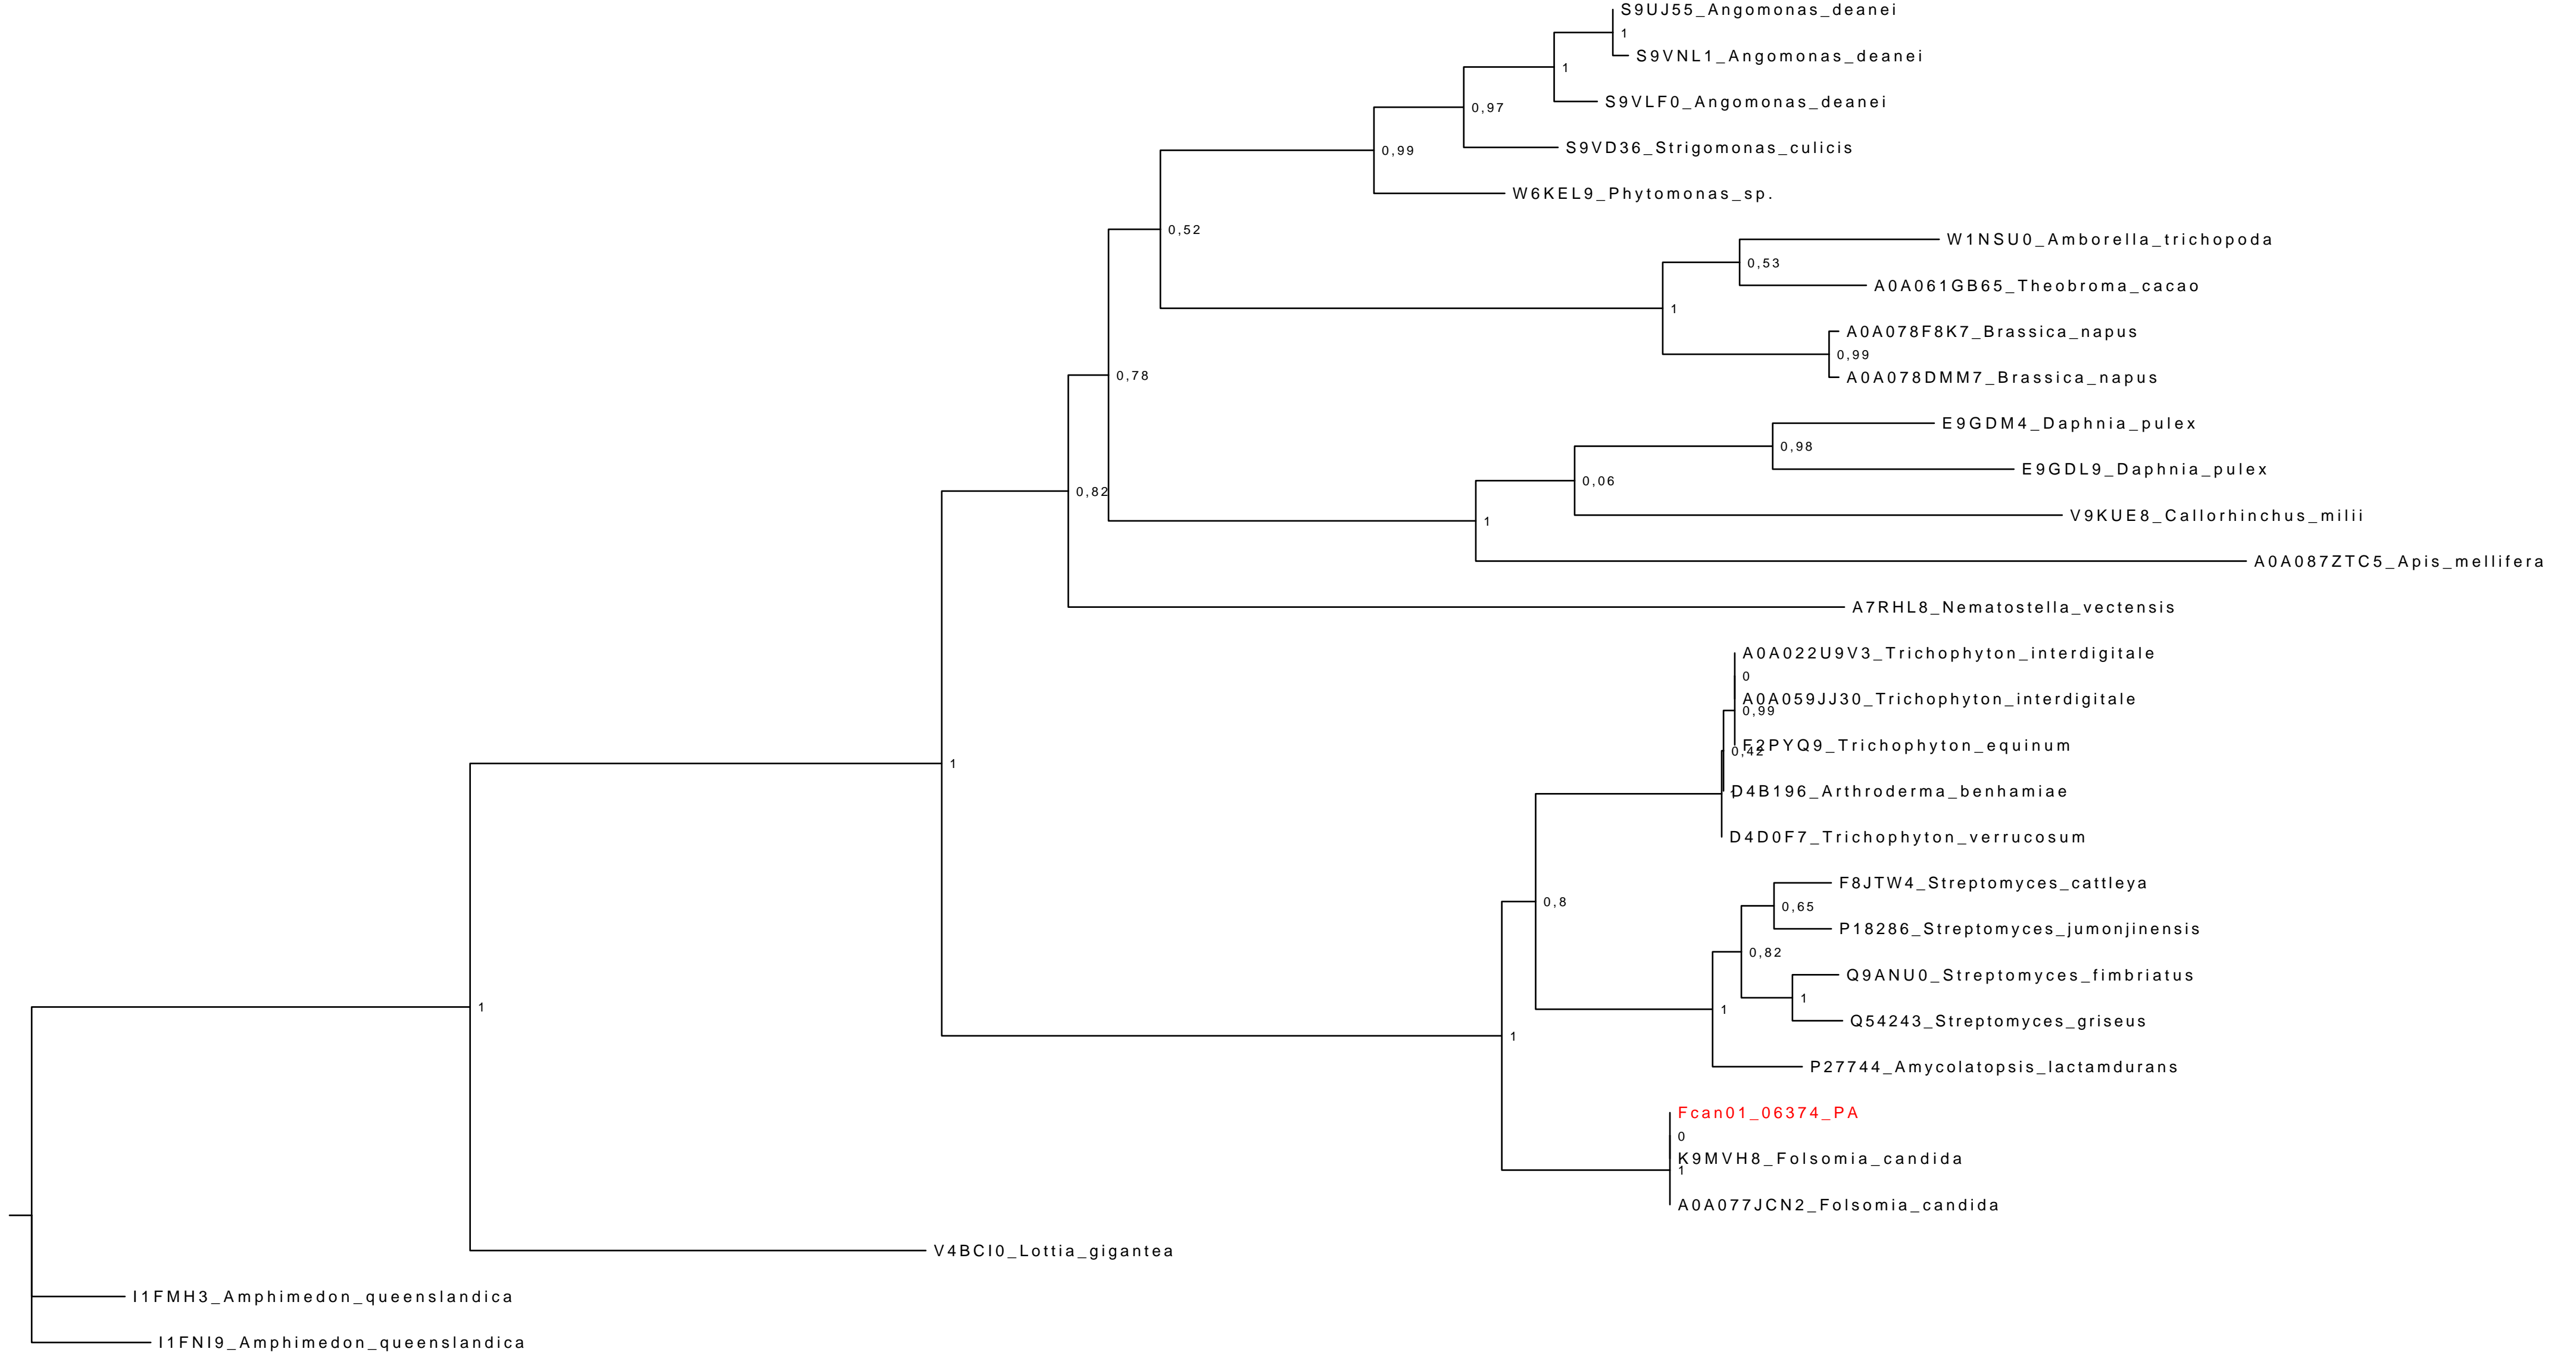

0.4

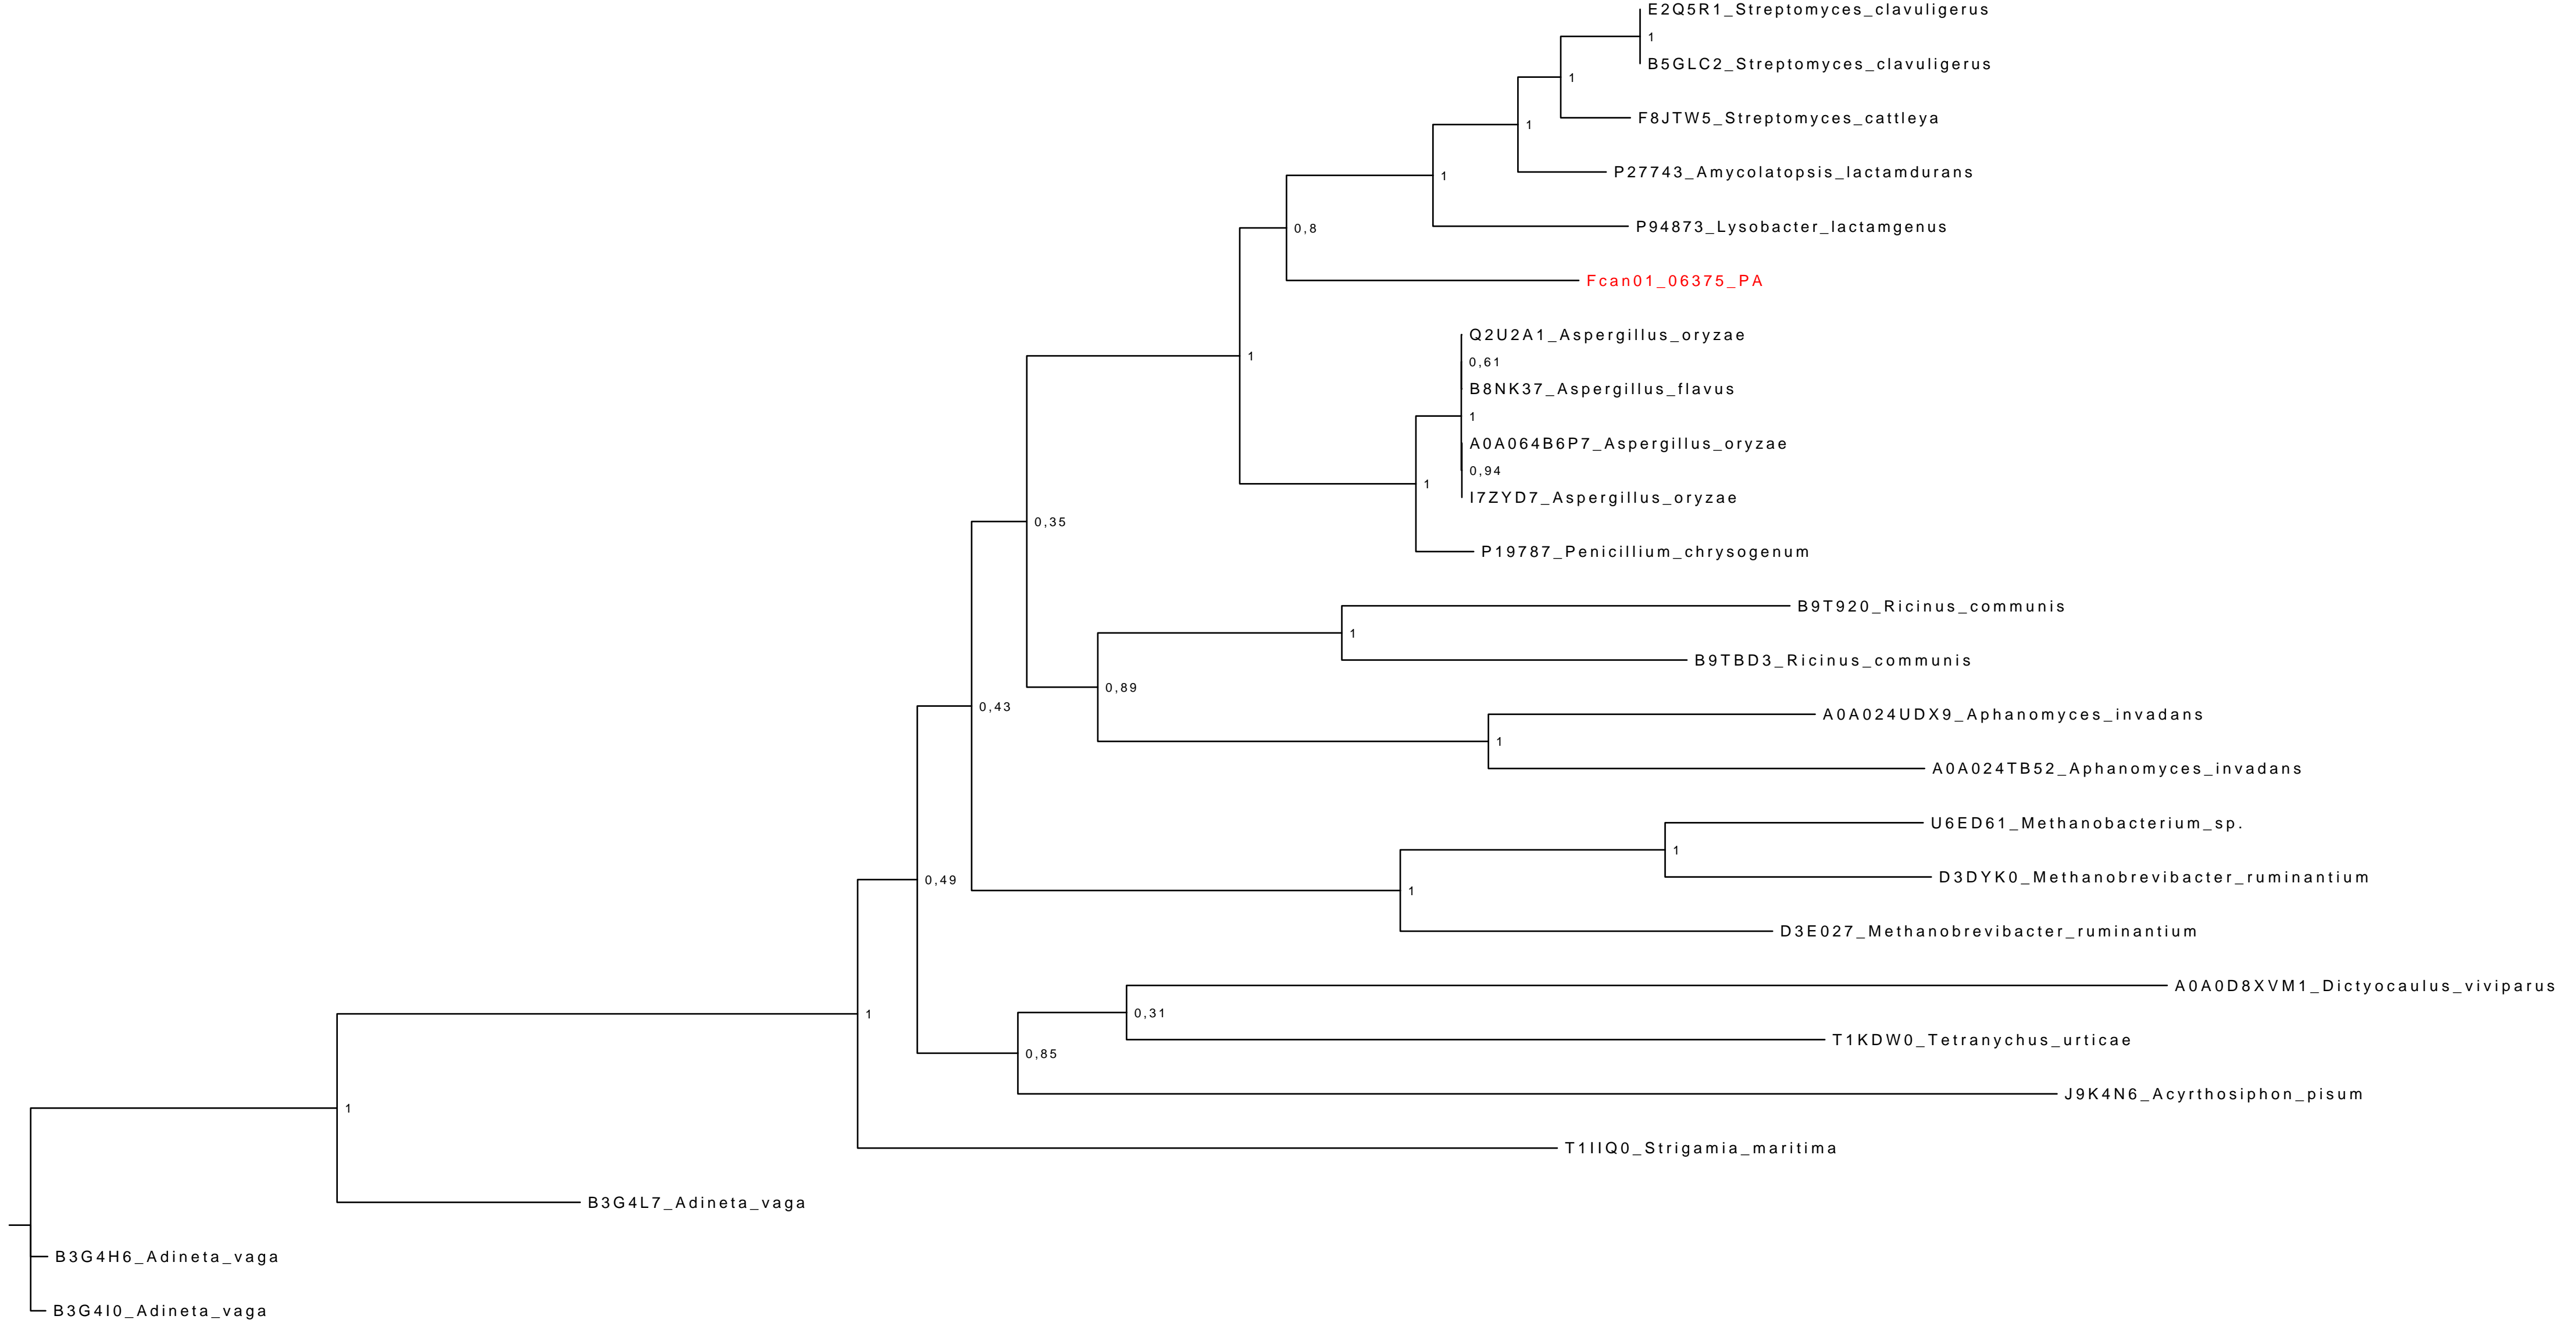

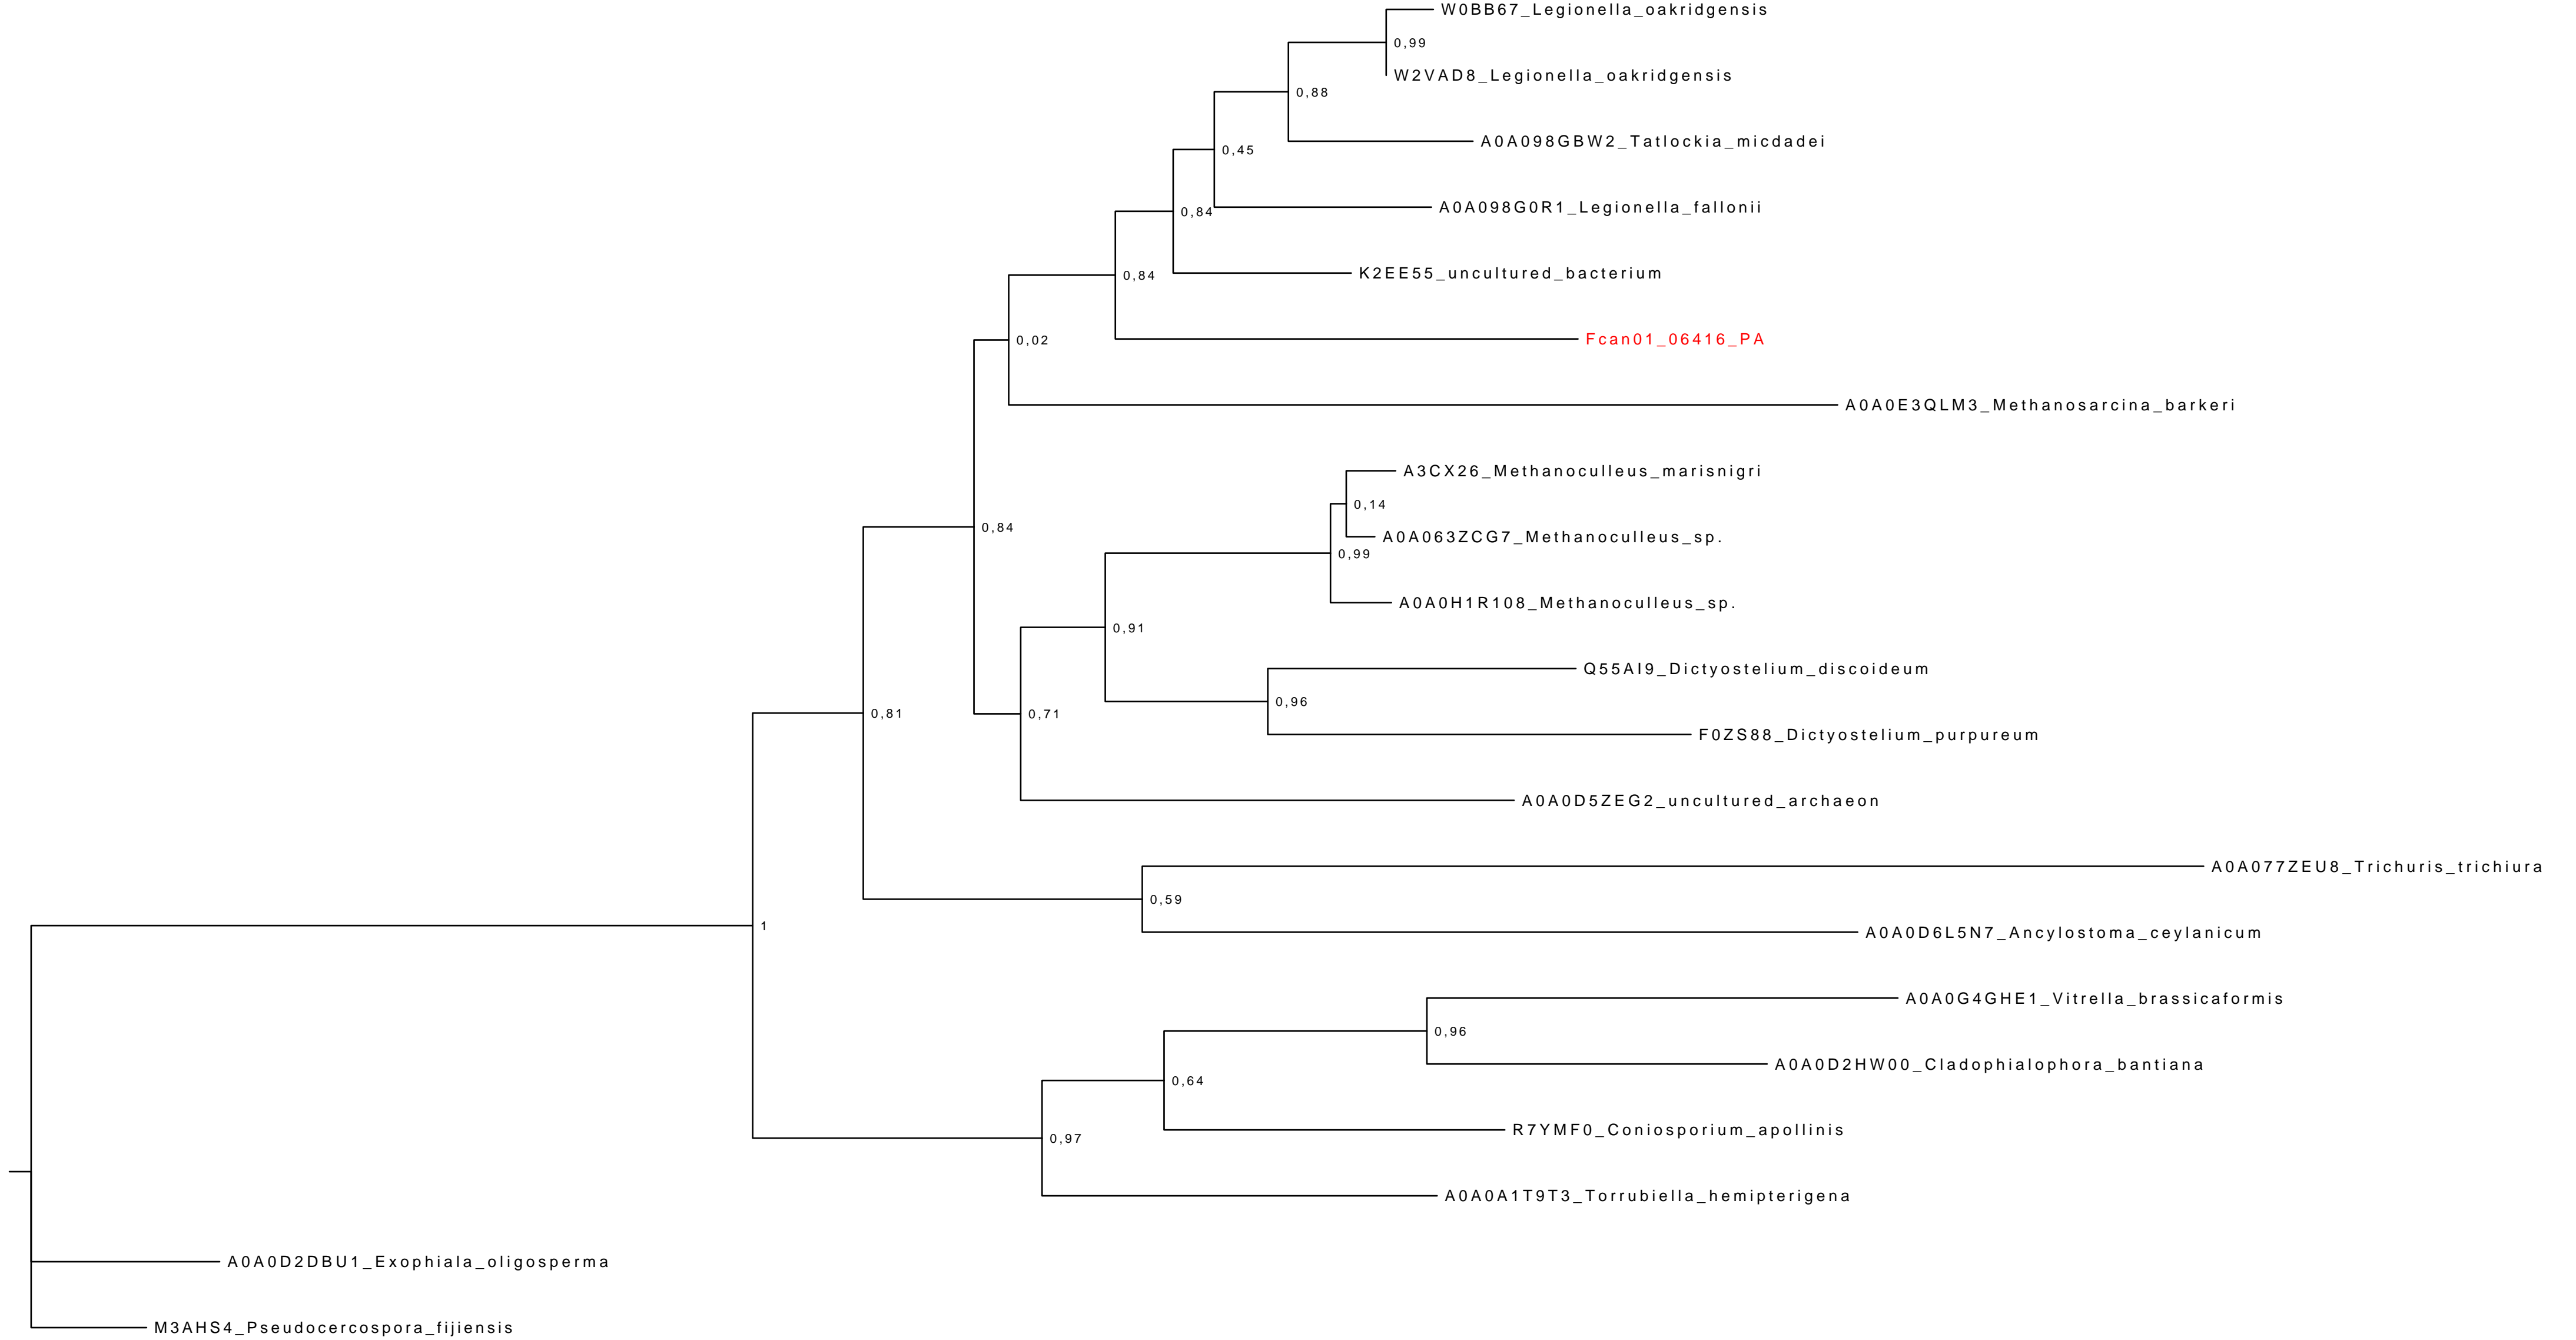

0.4

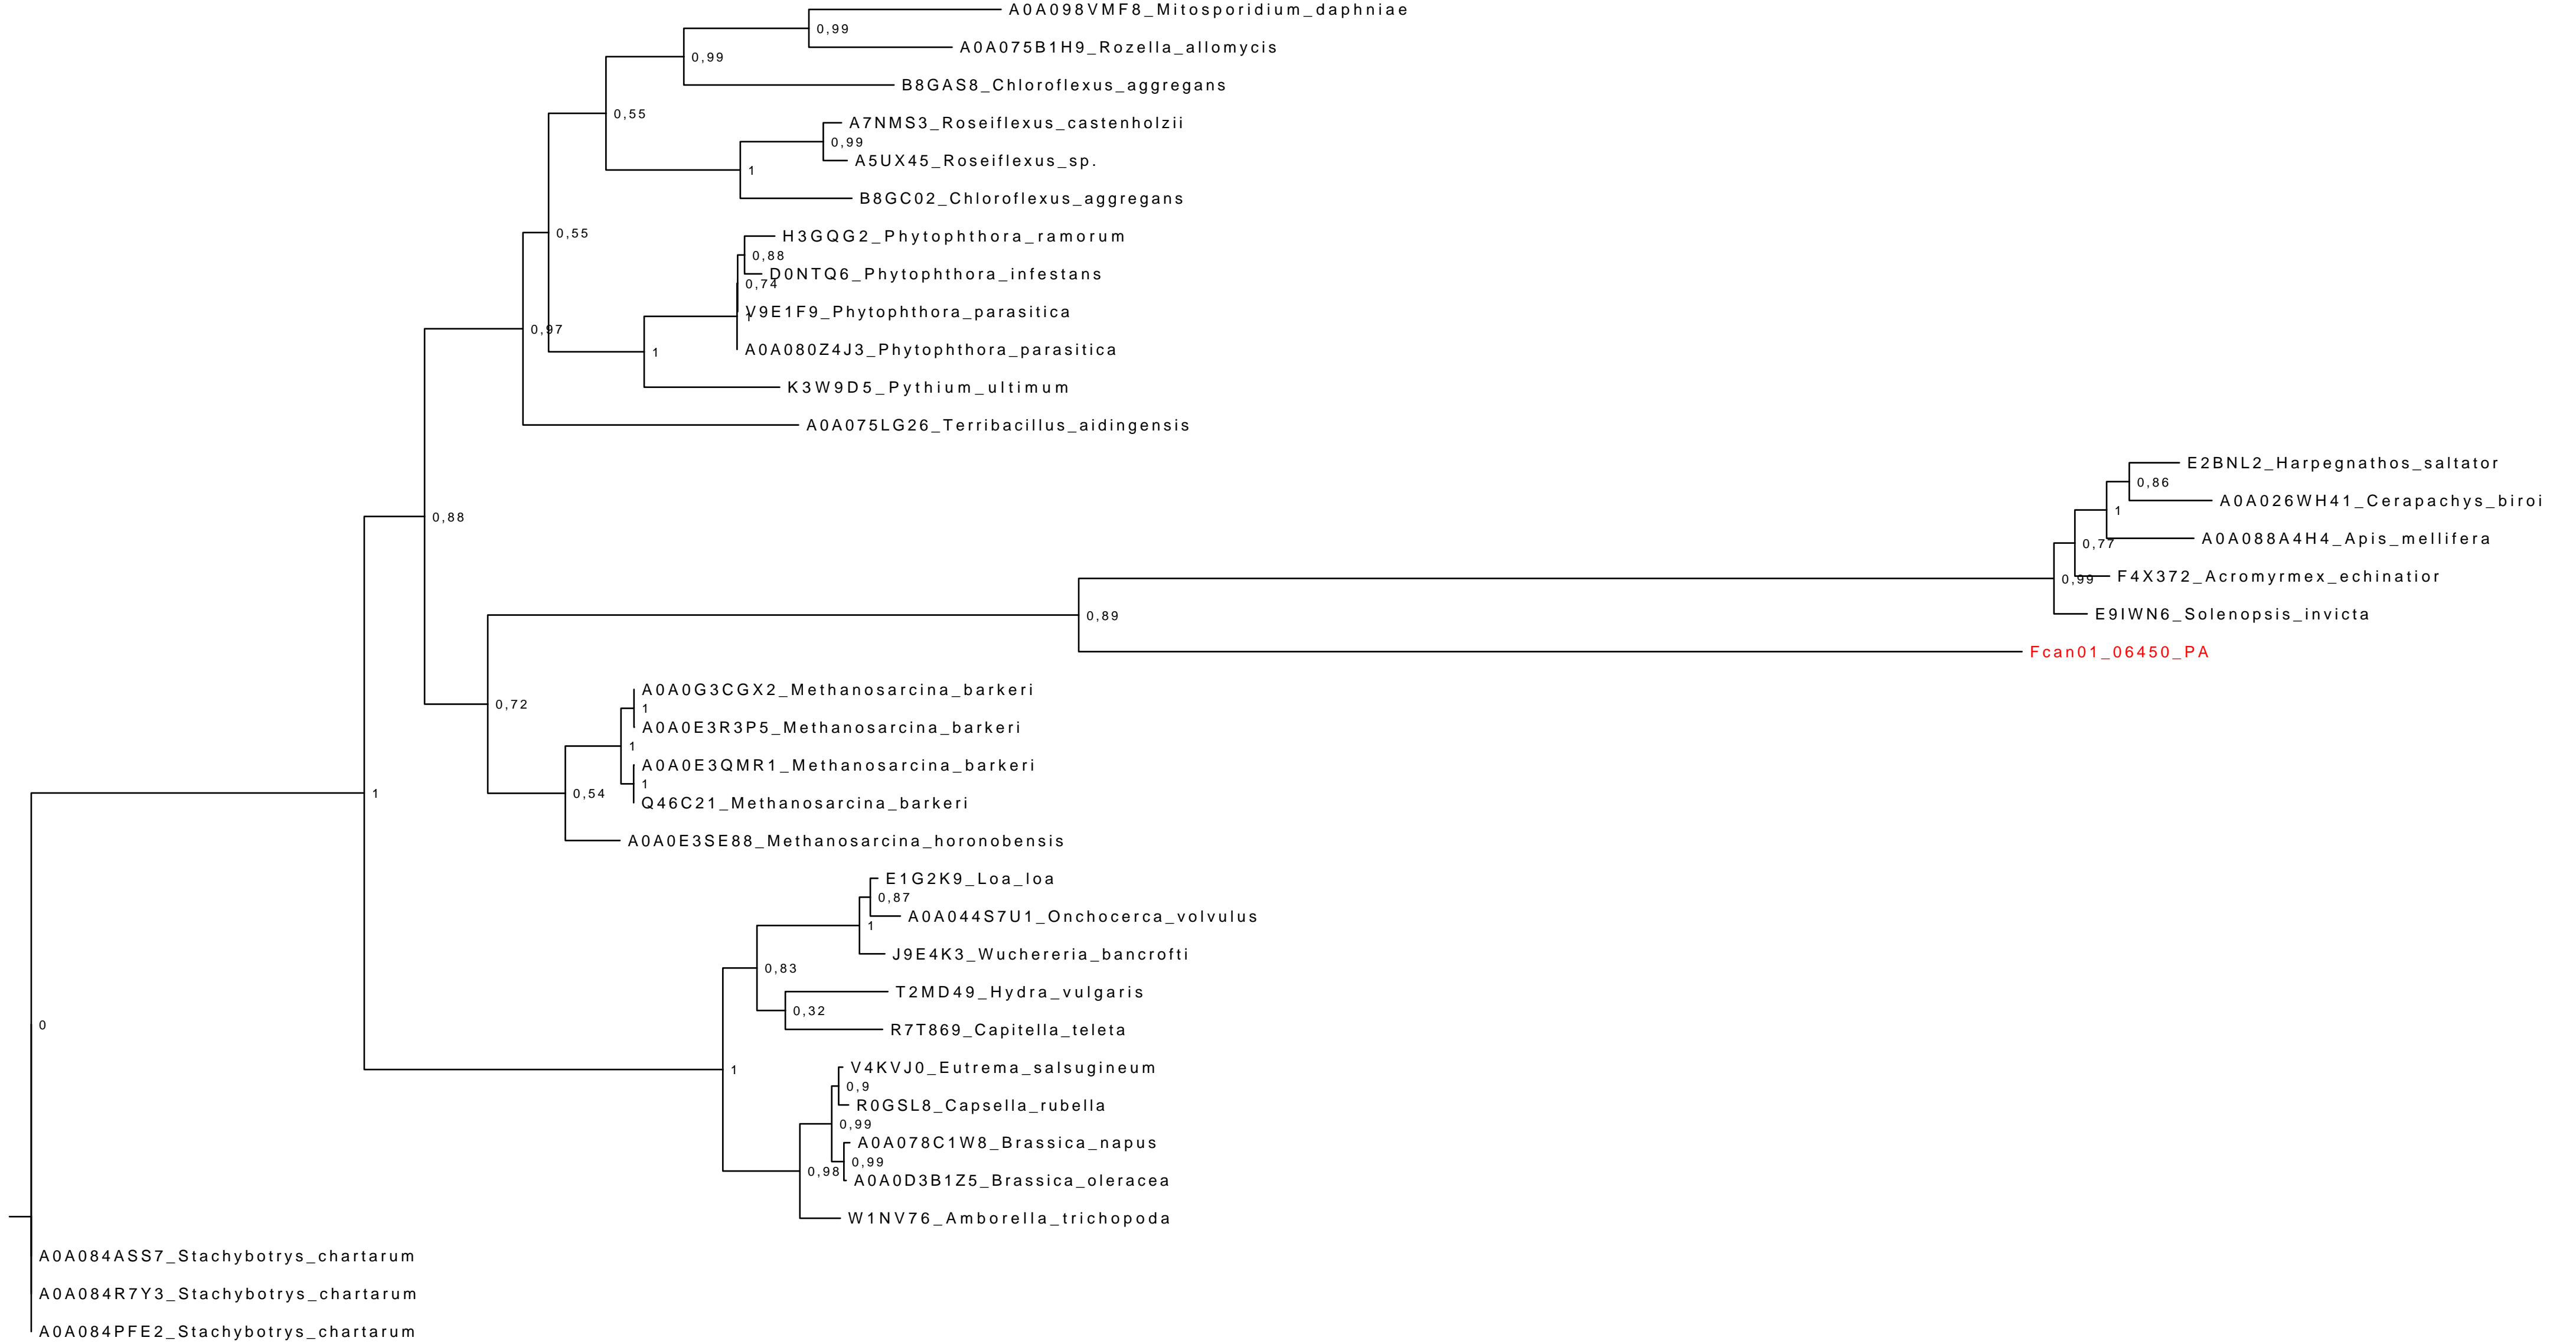

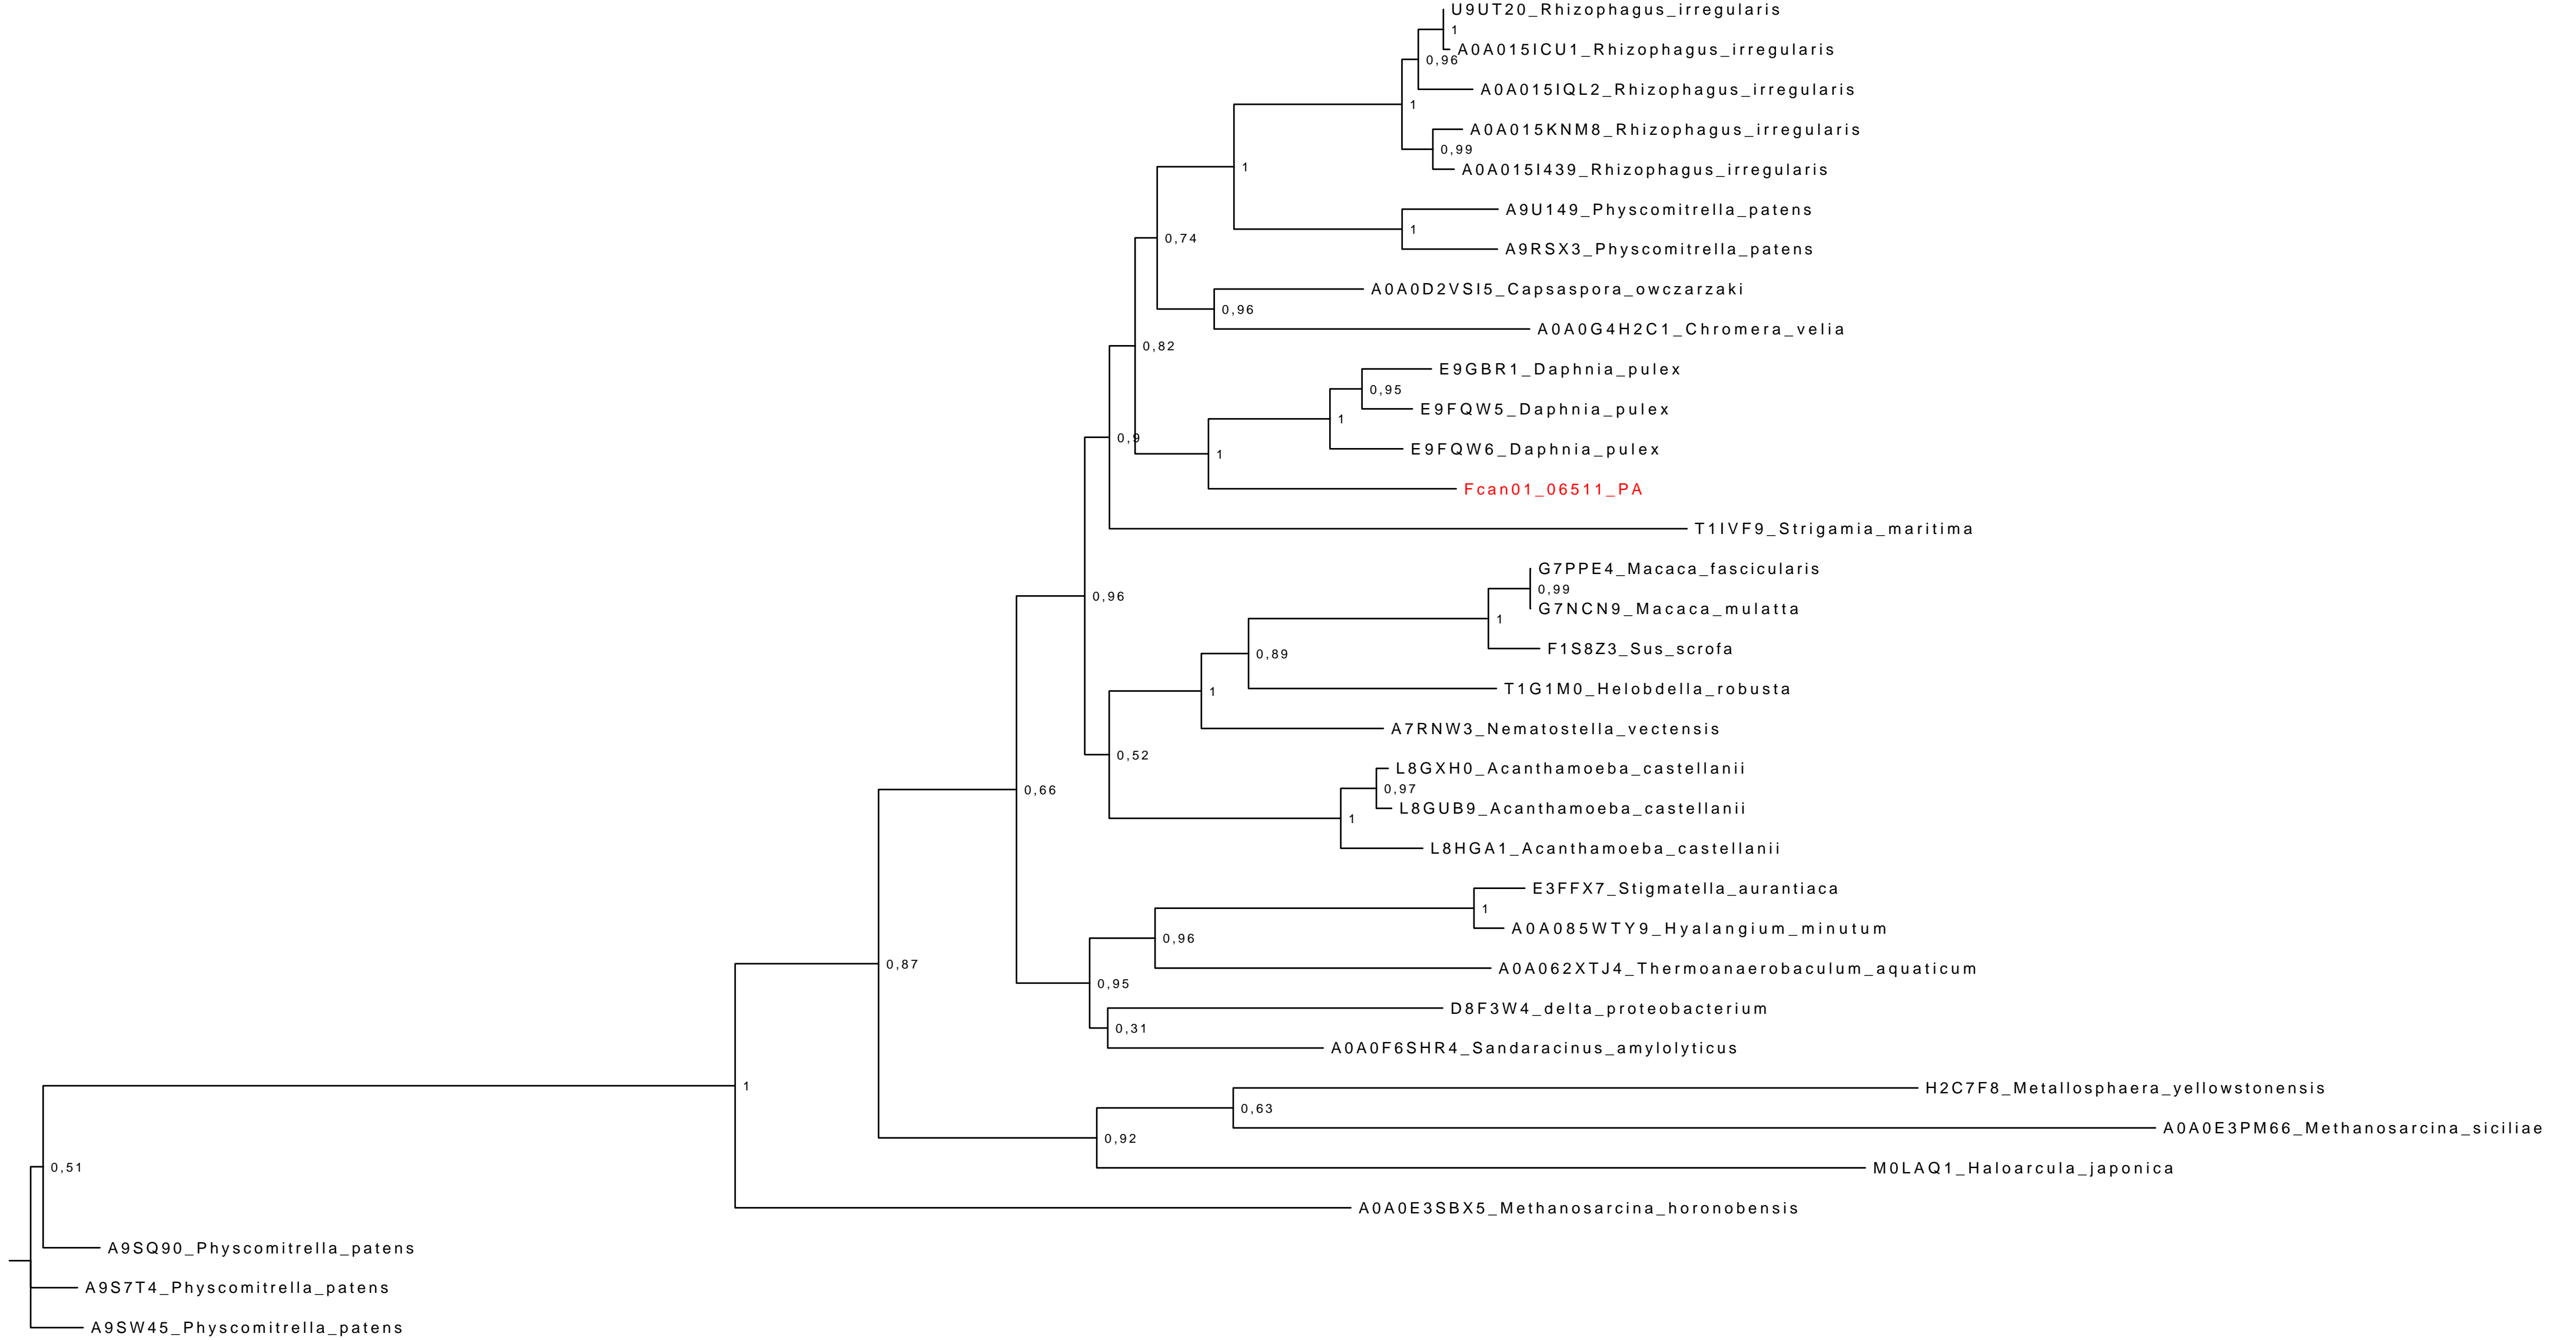



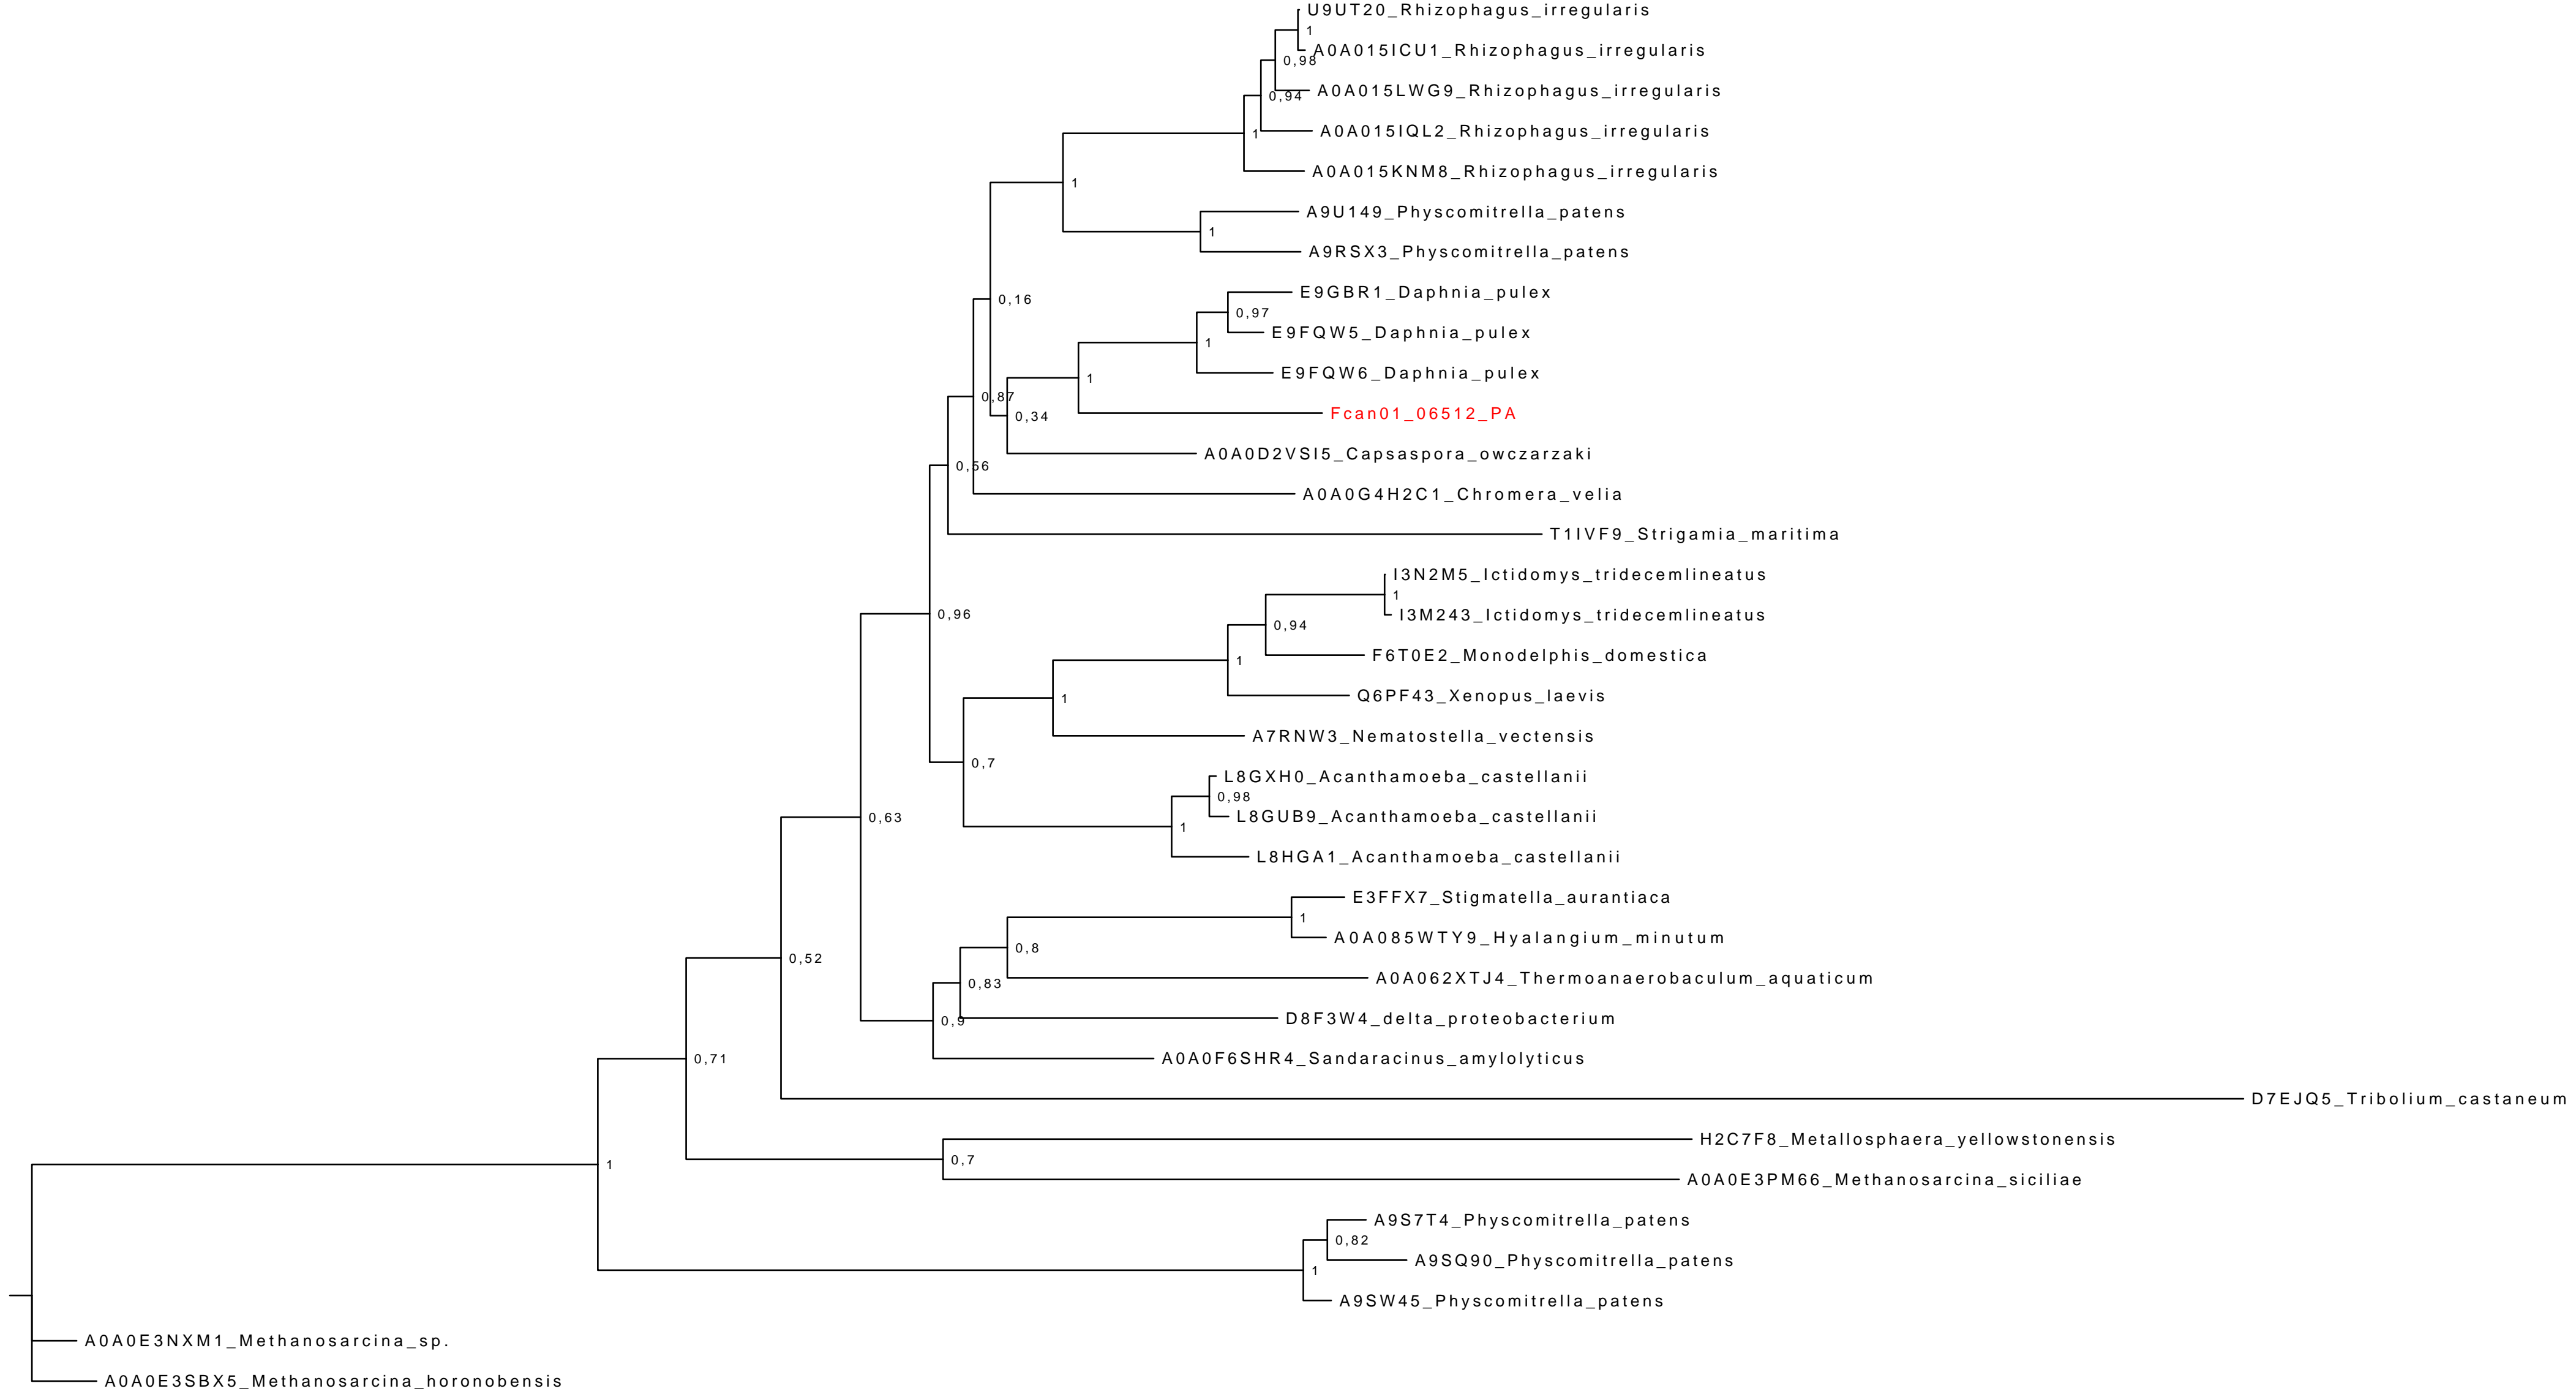



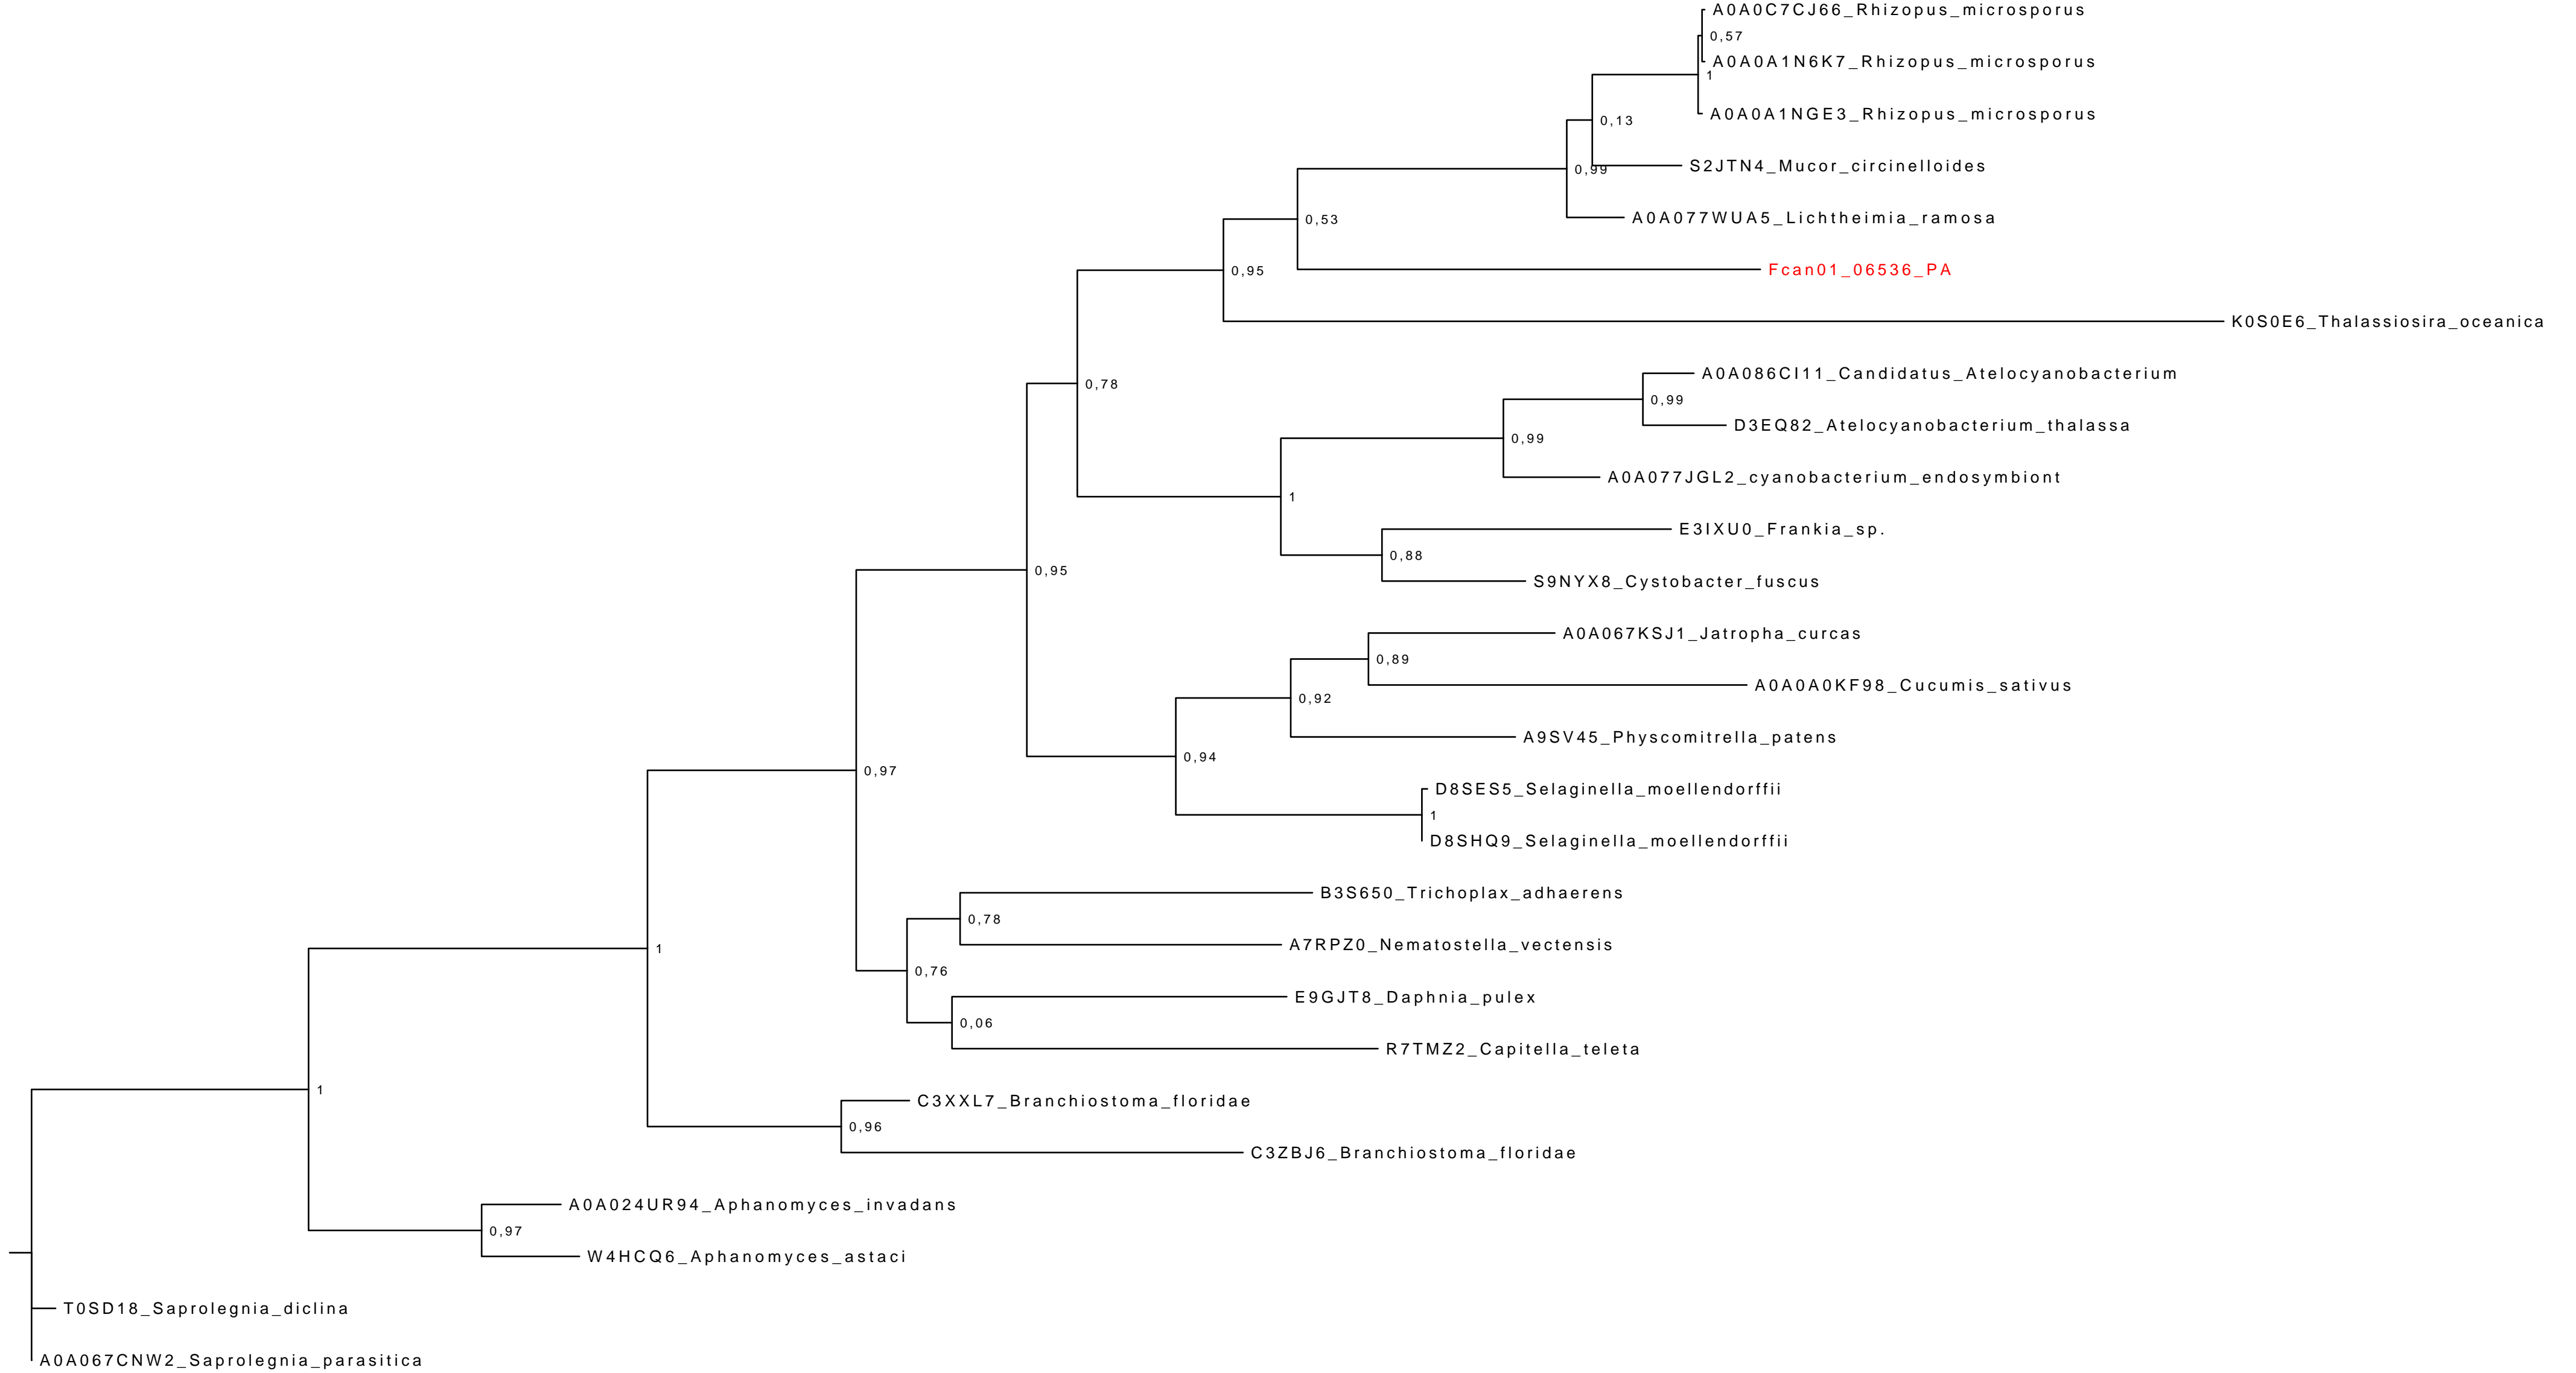

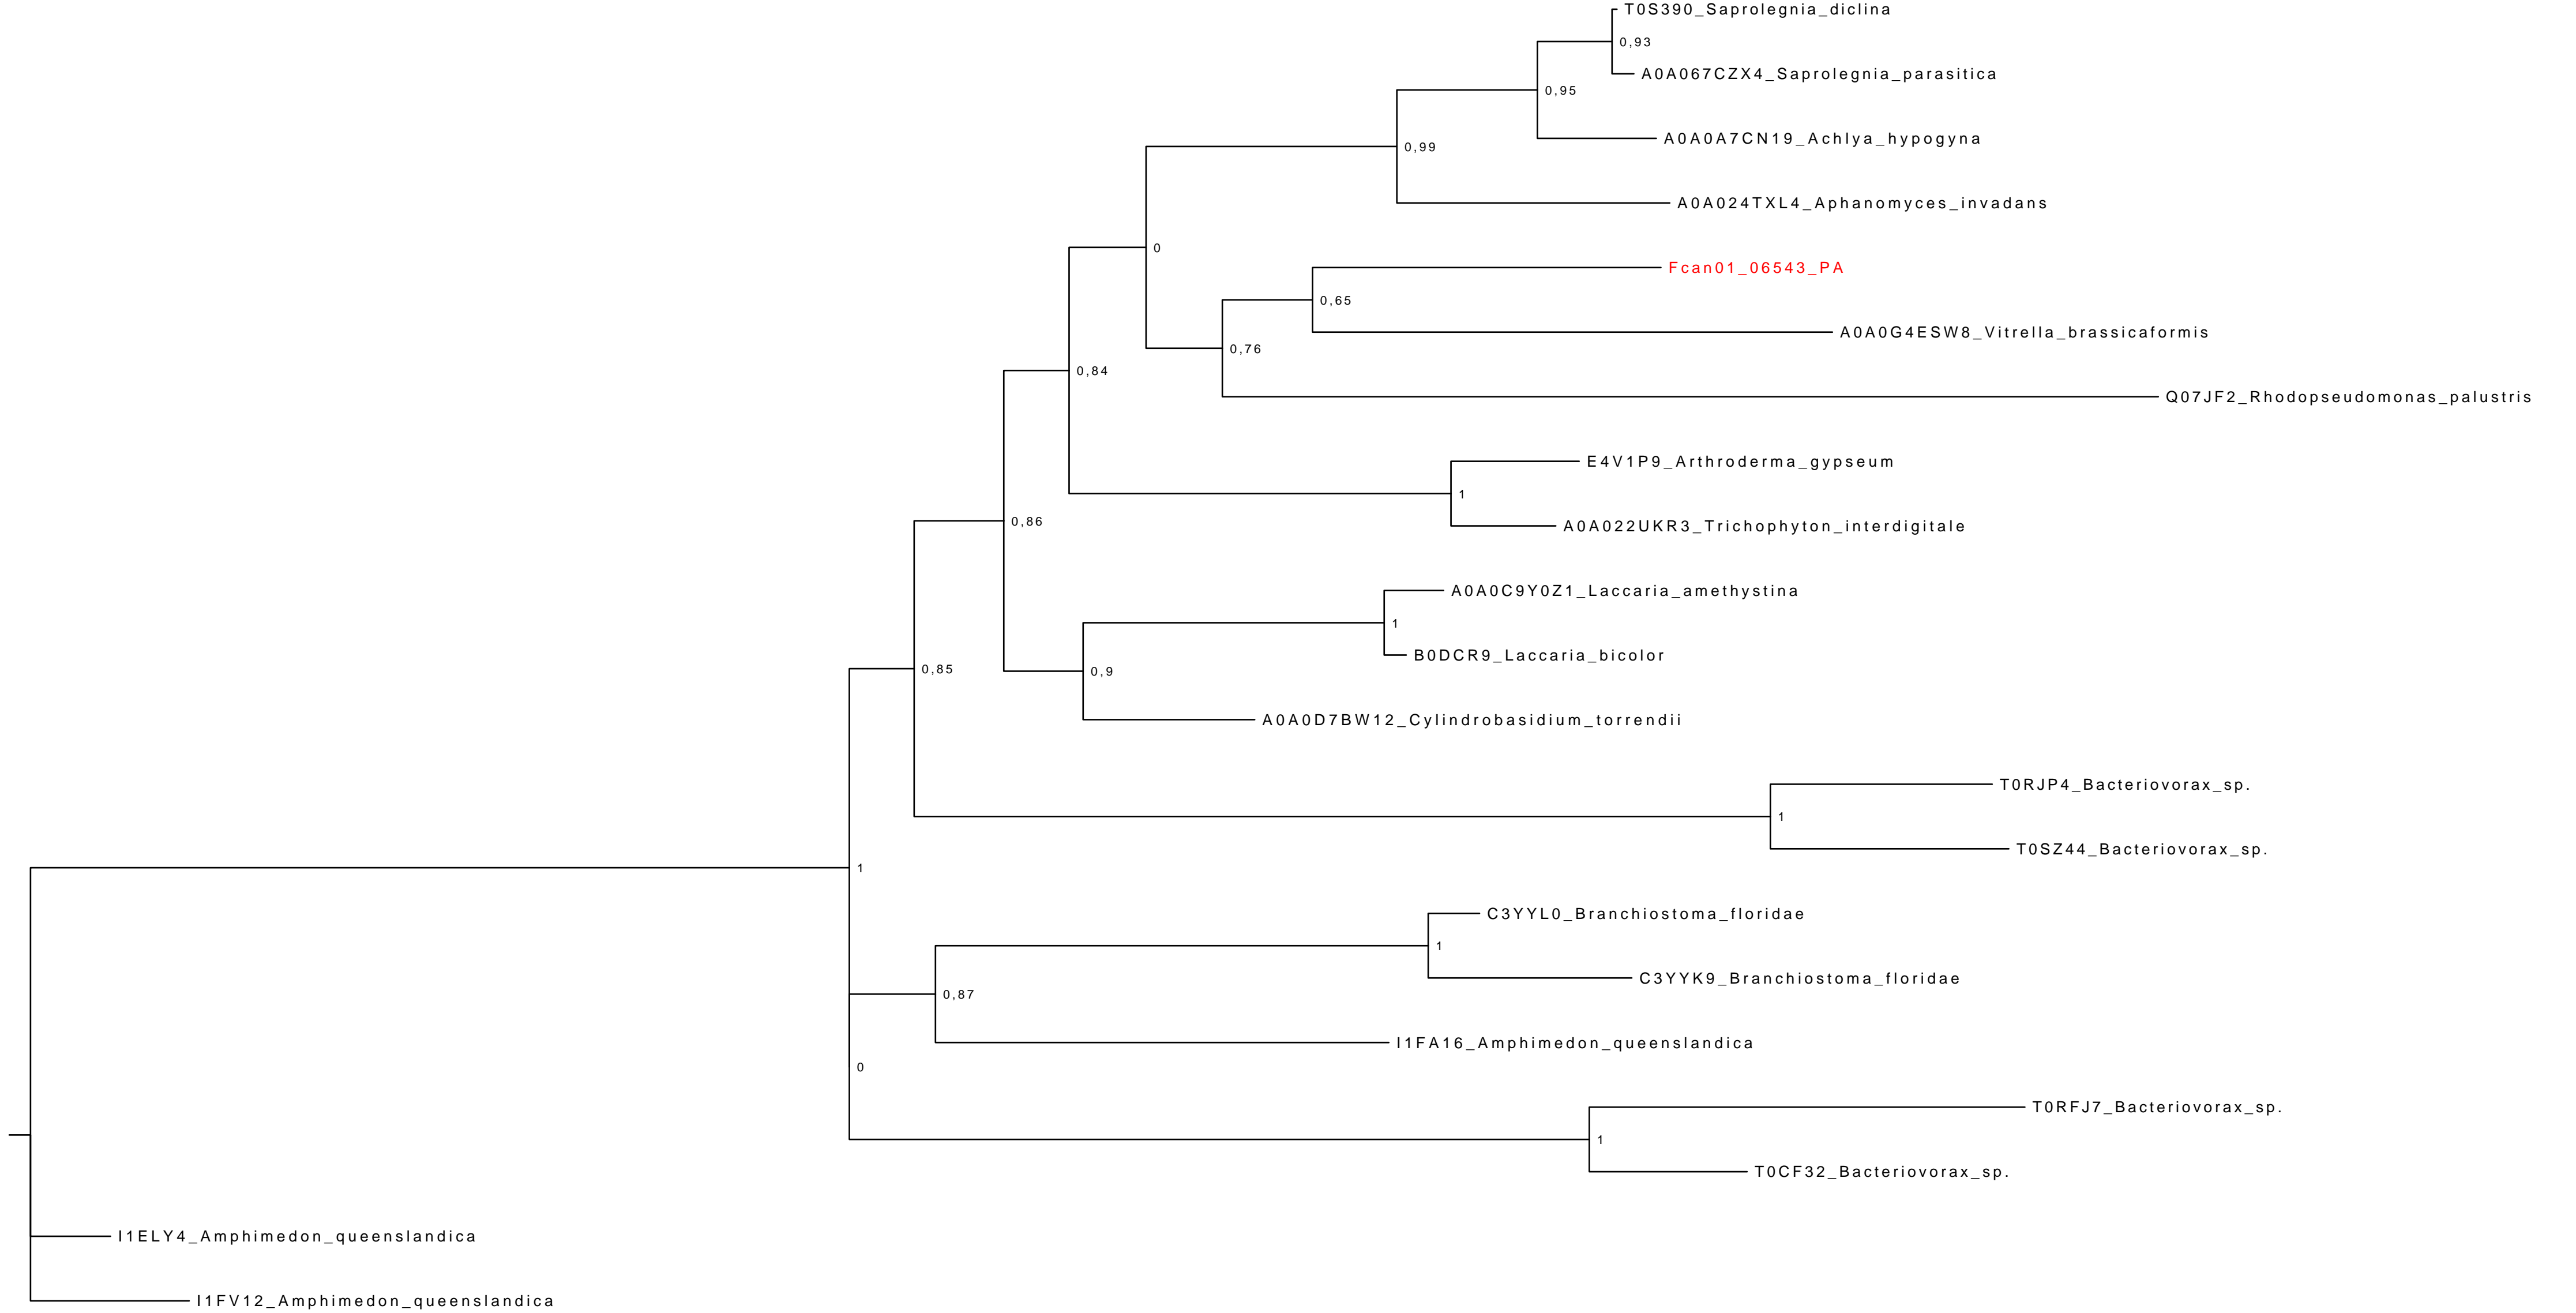

0.5

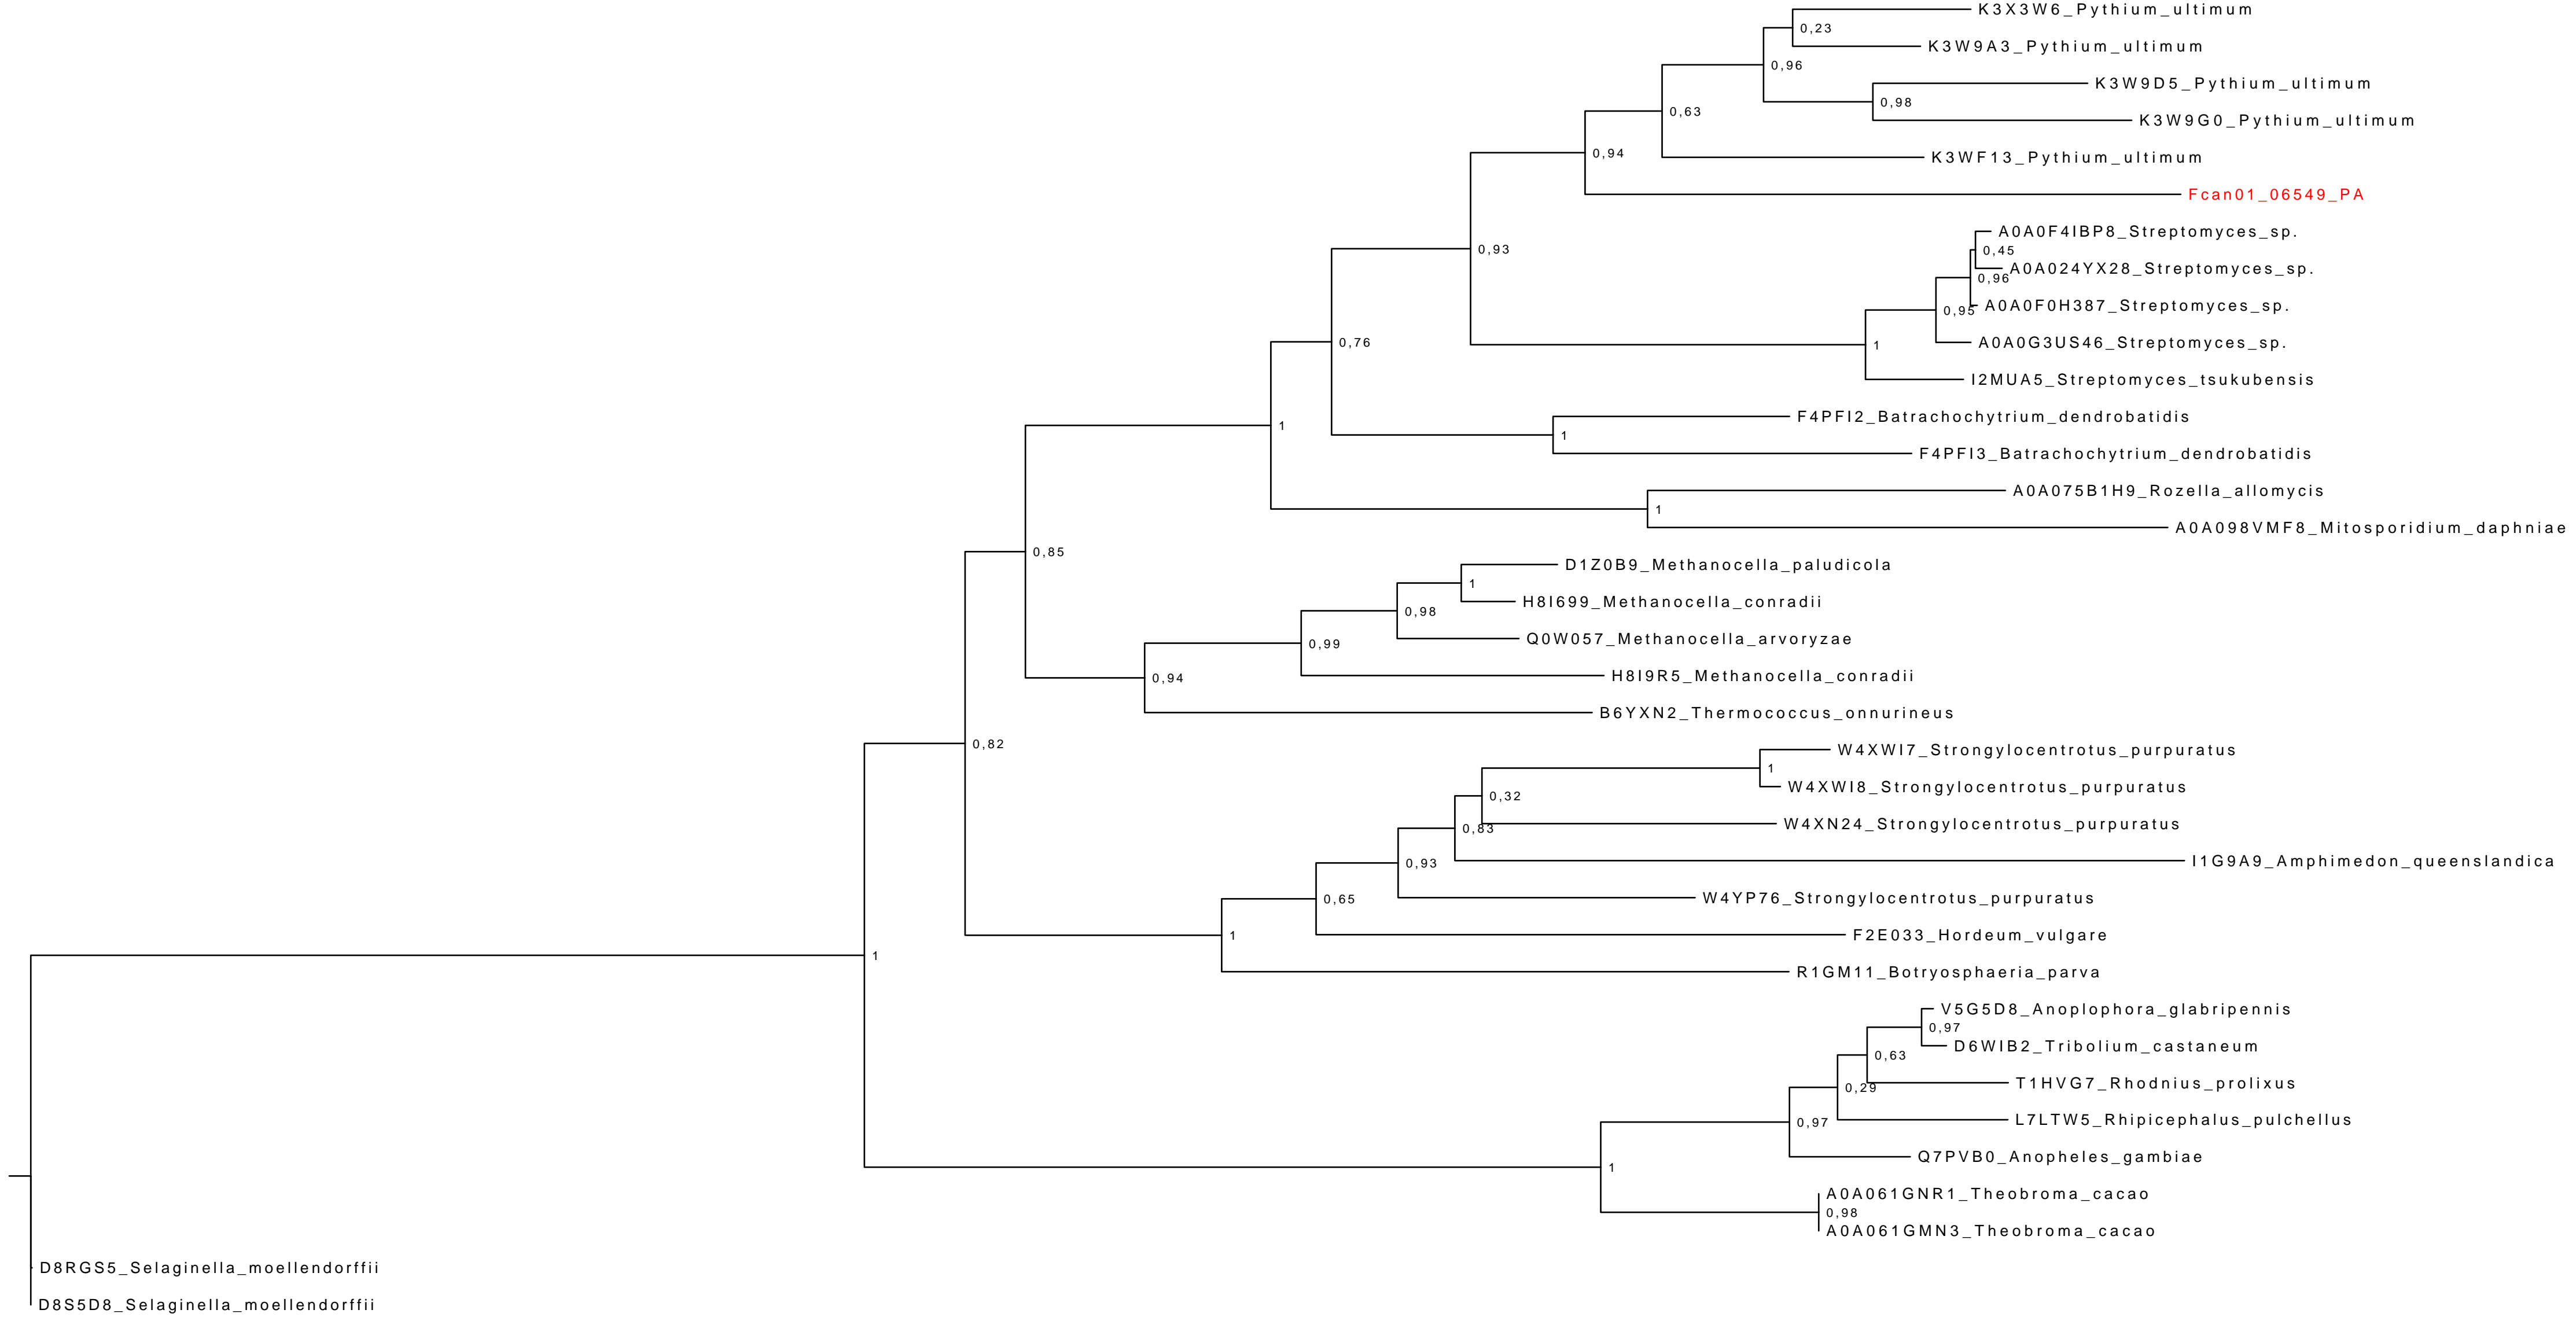

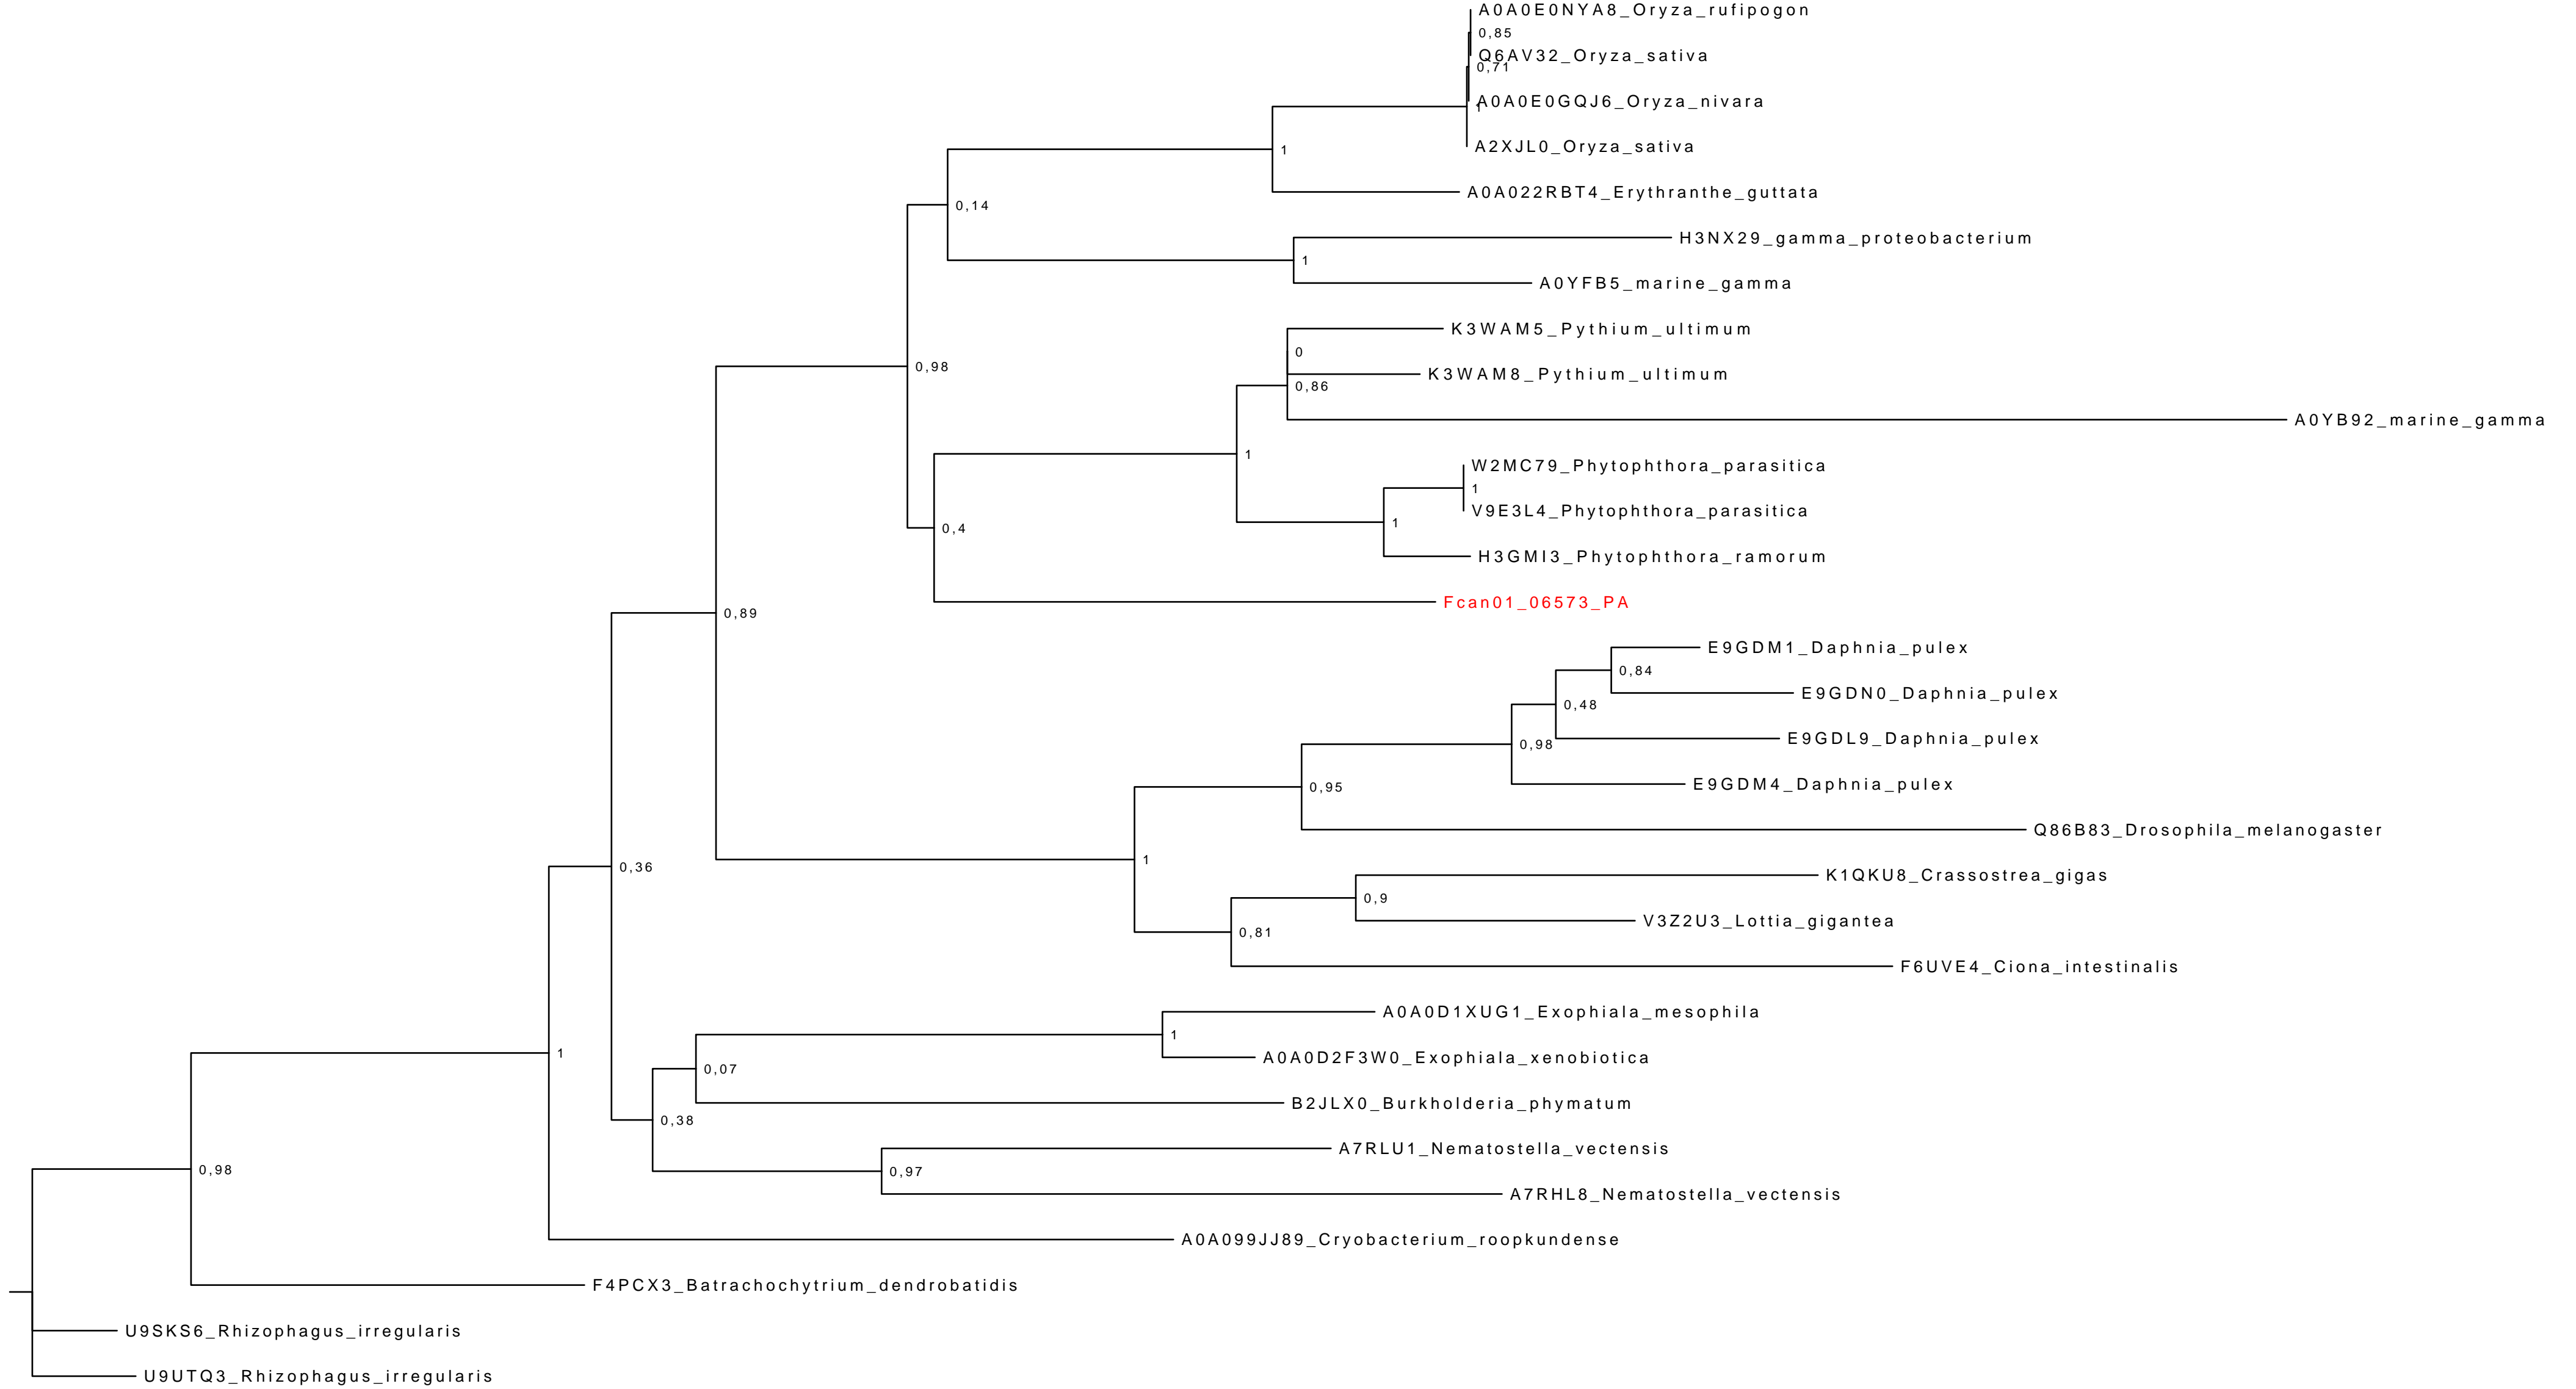

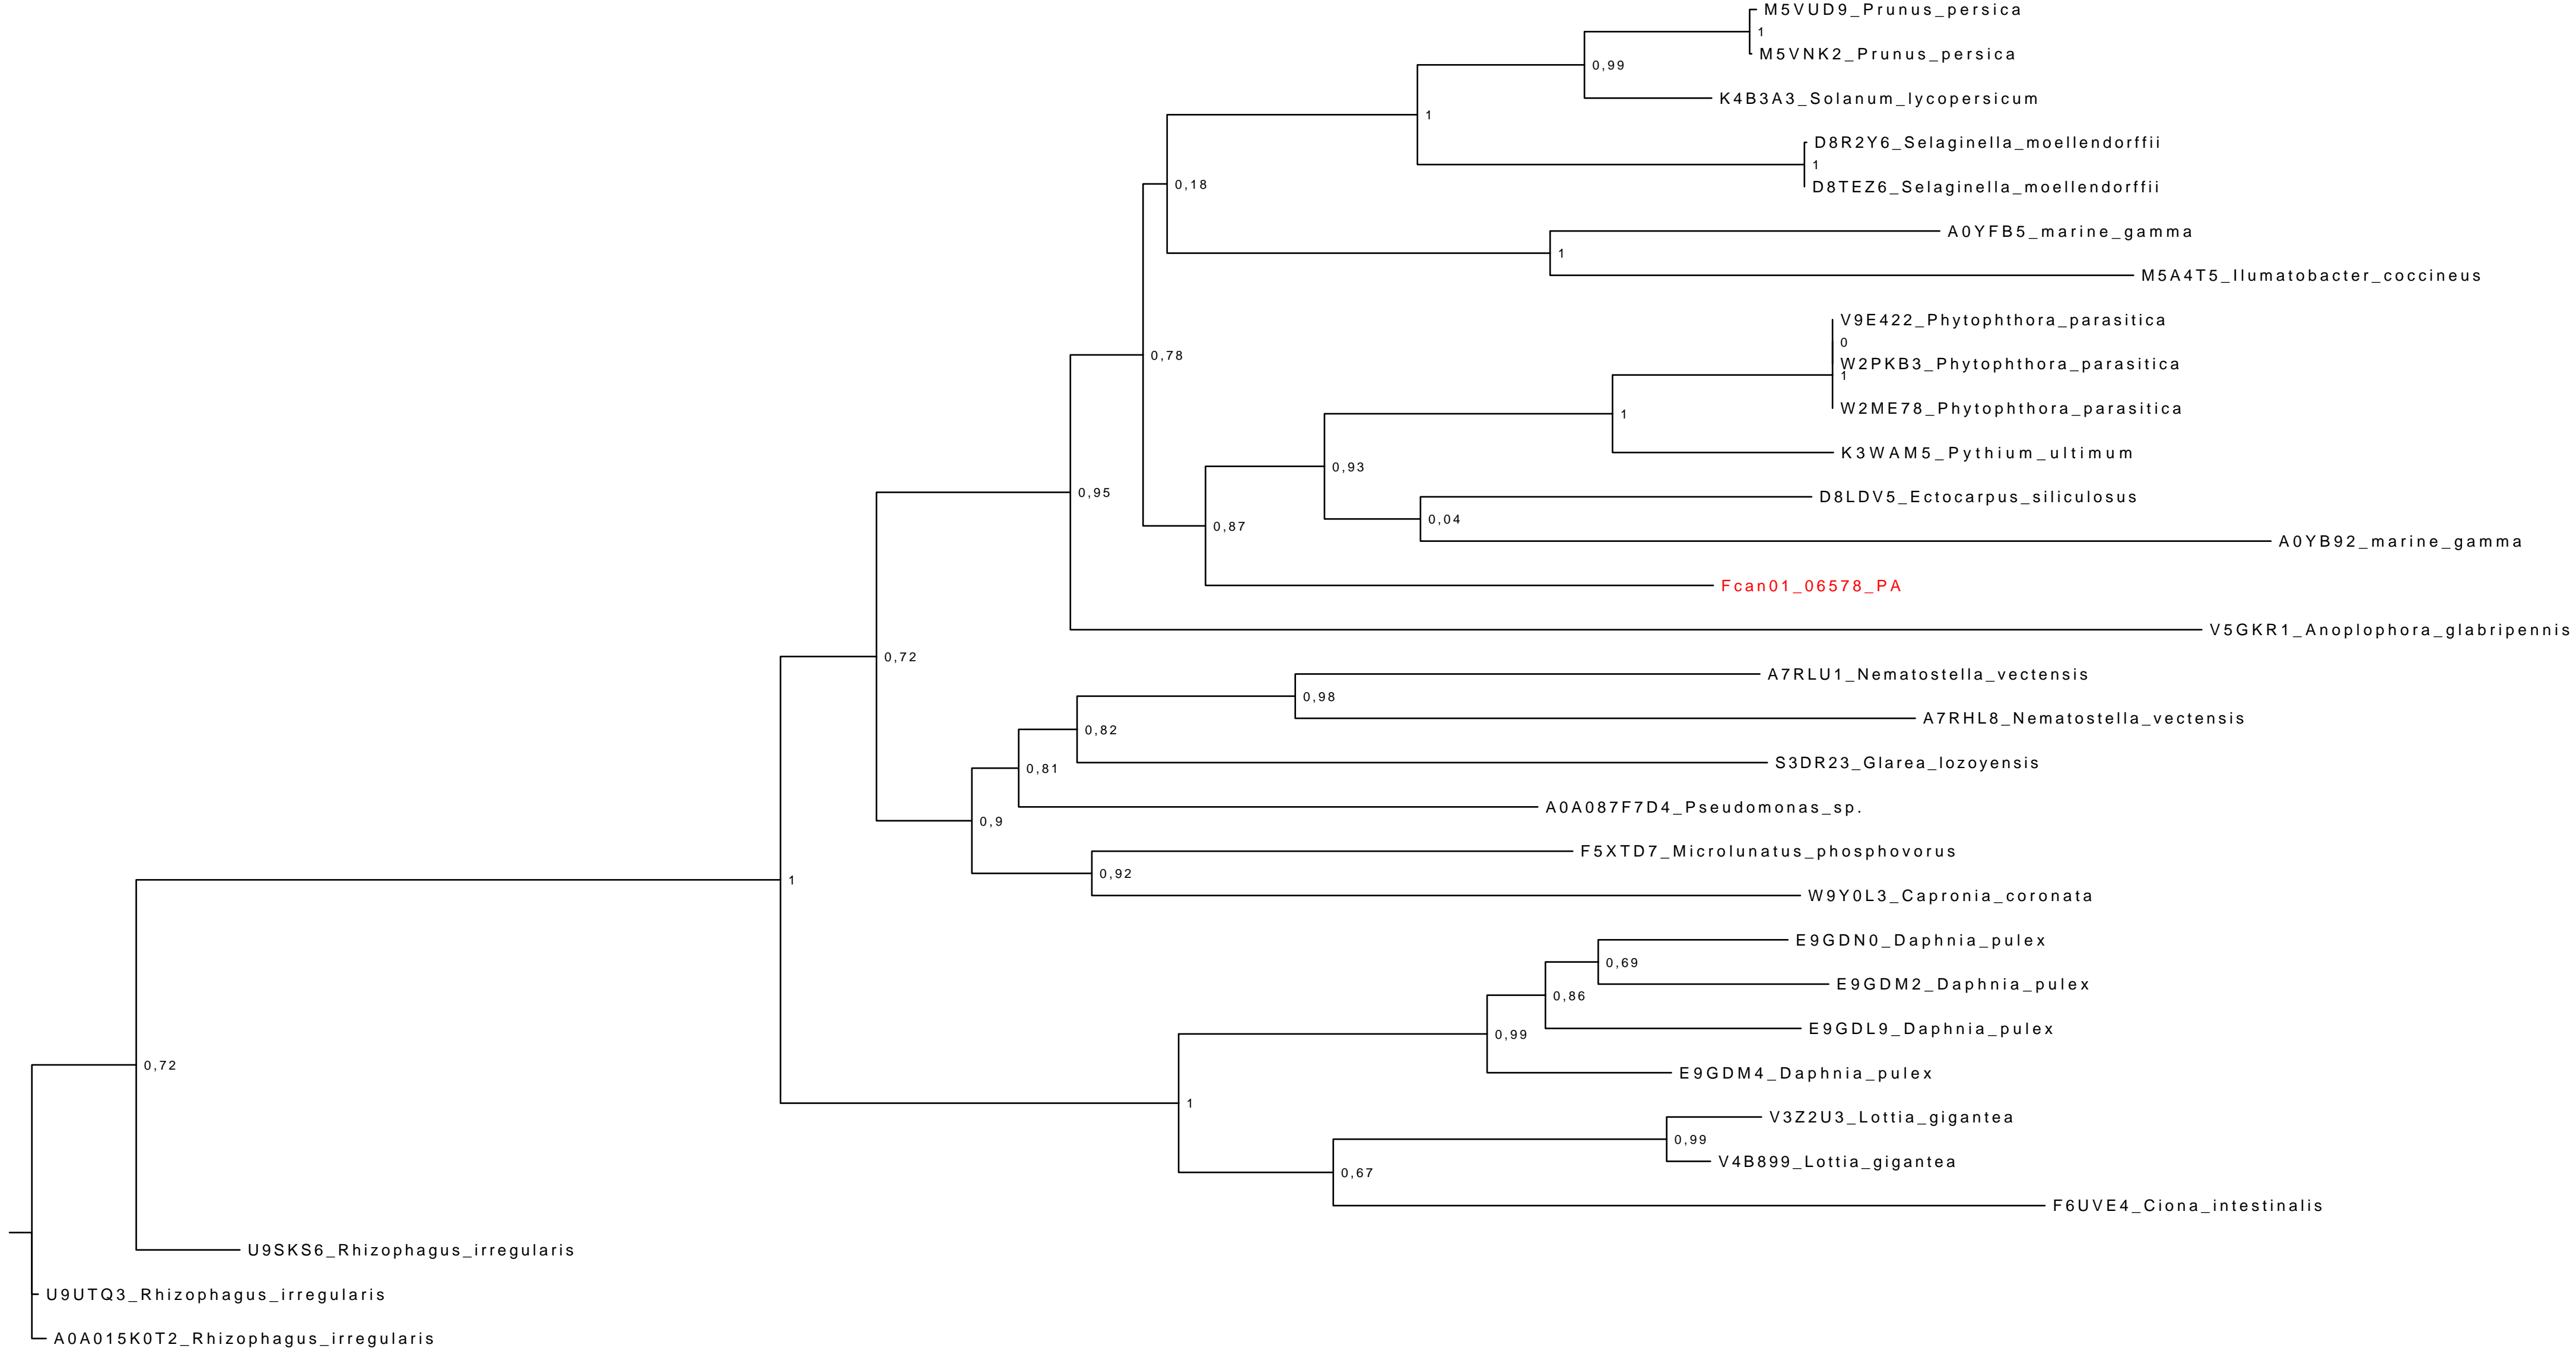

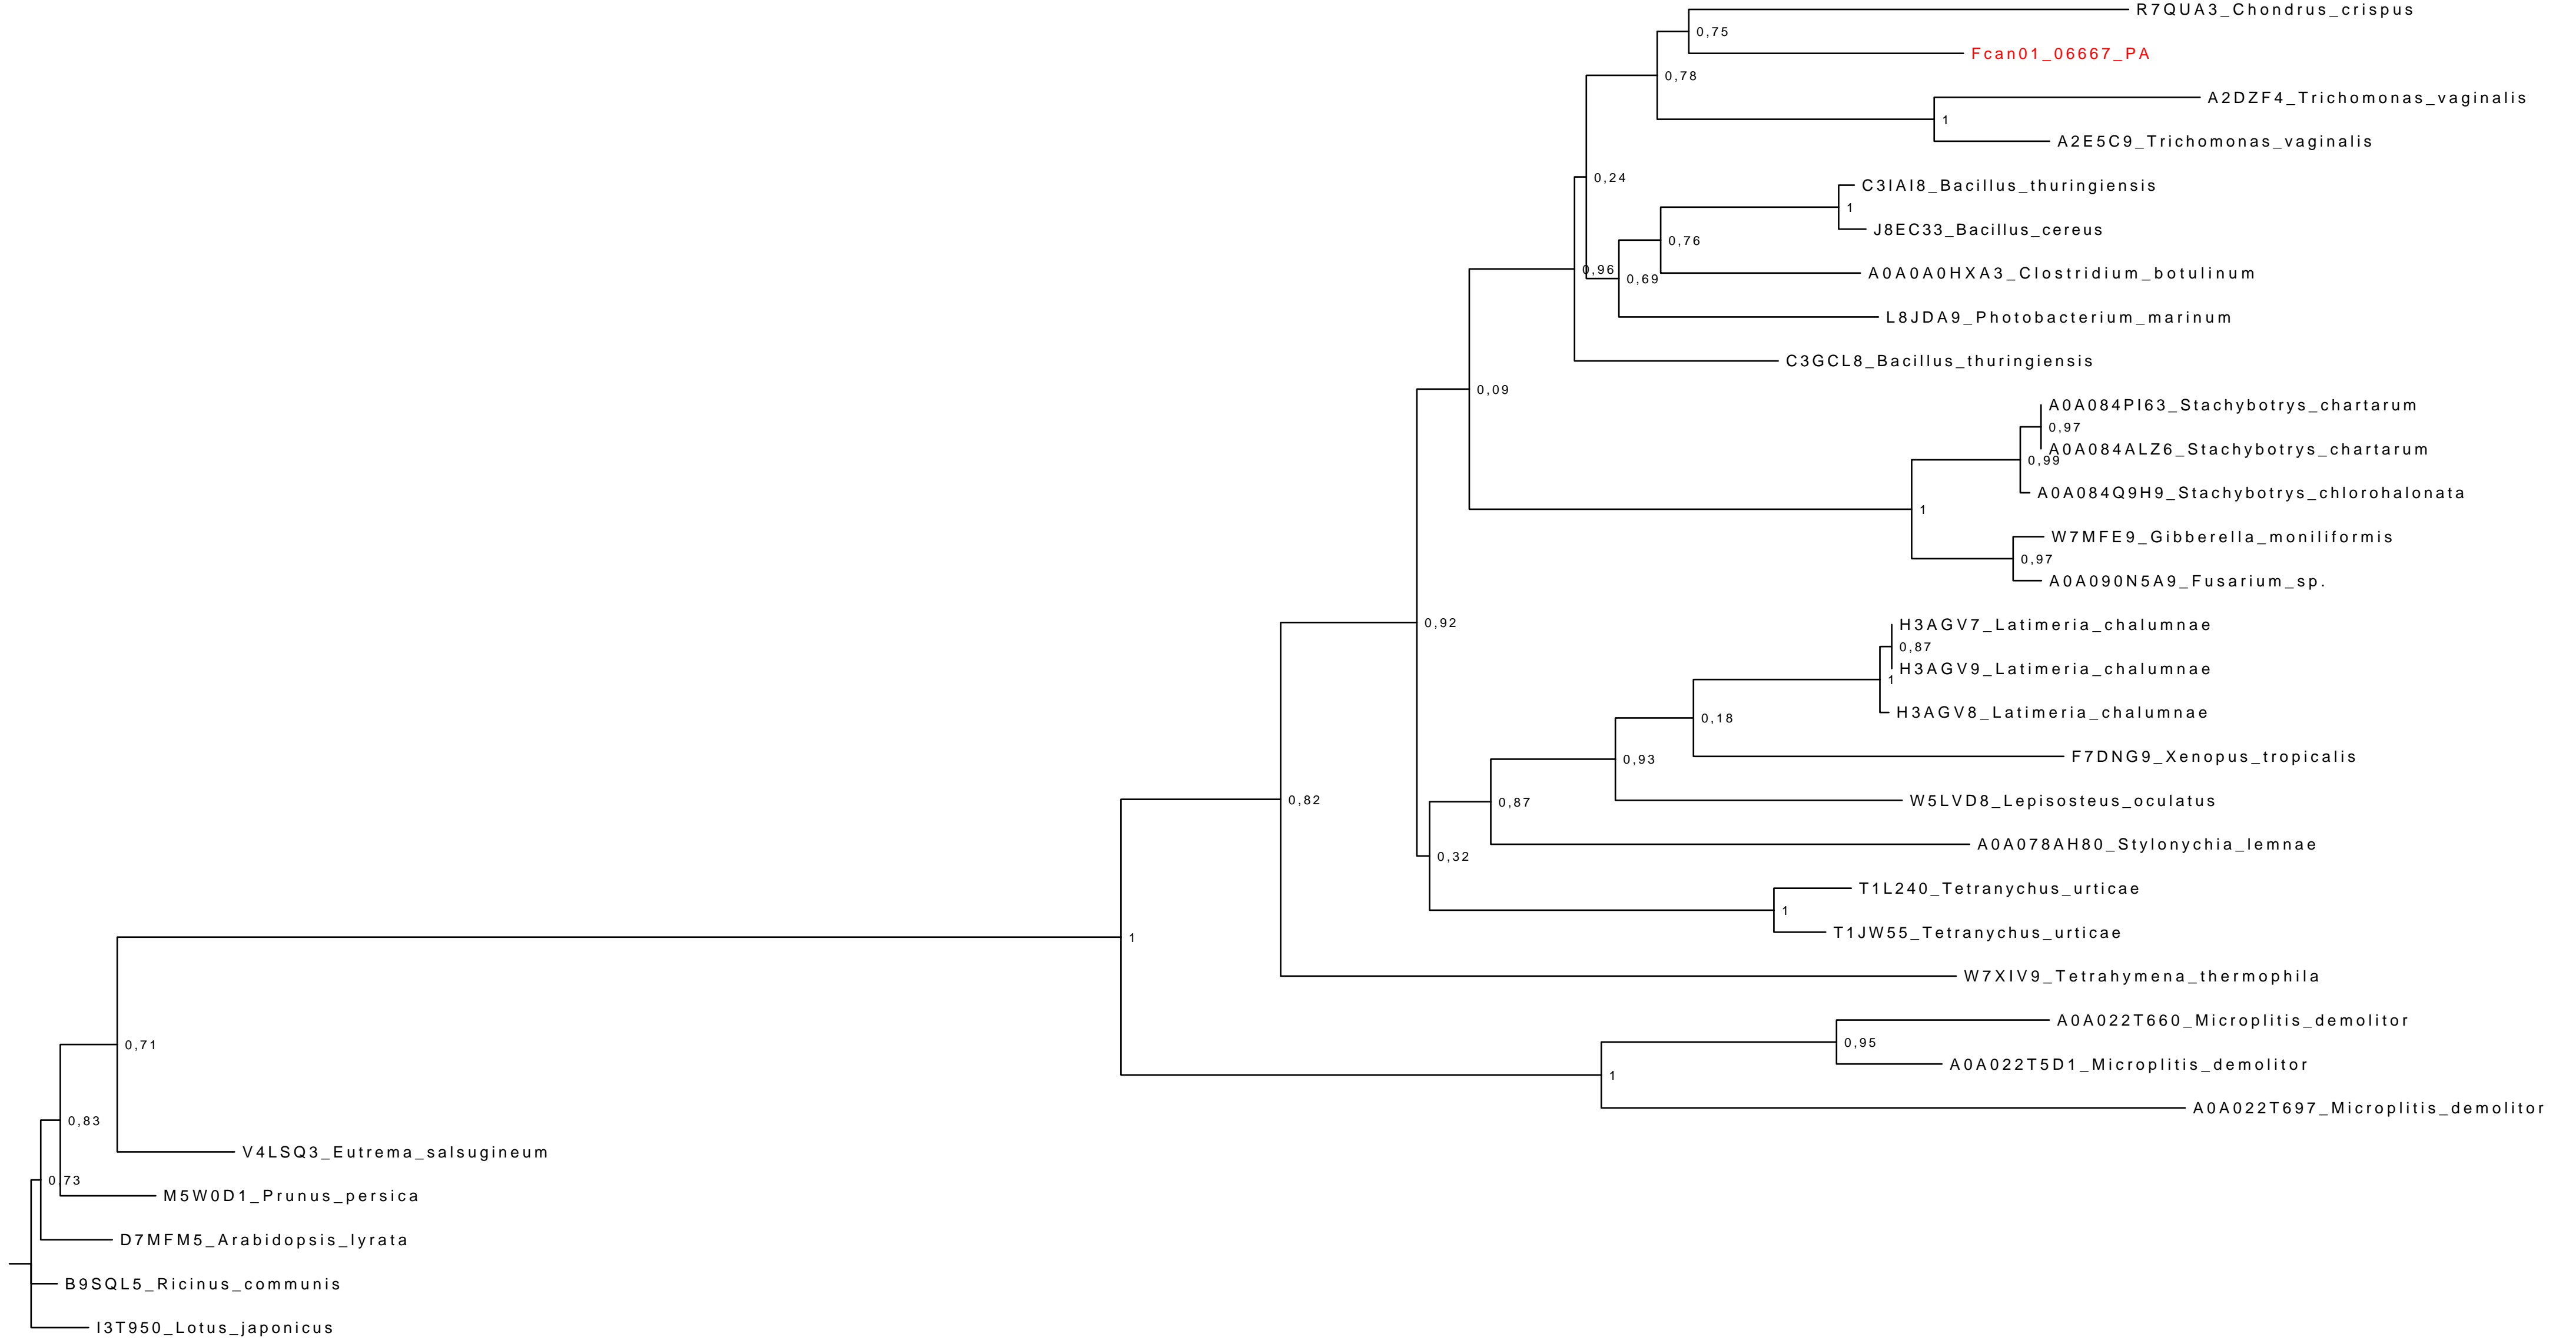



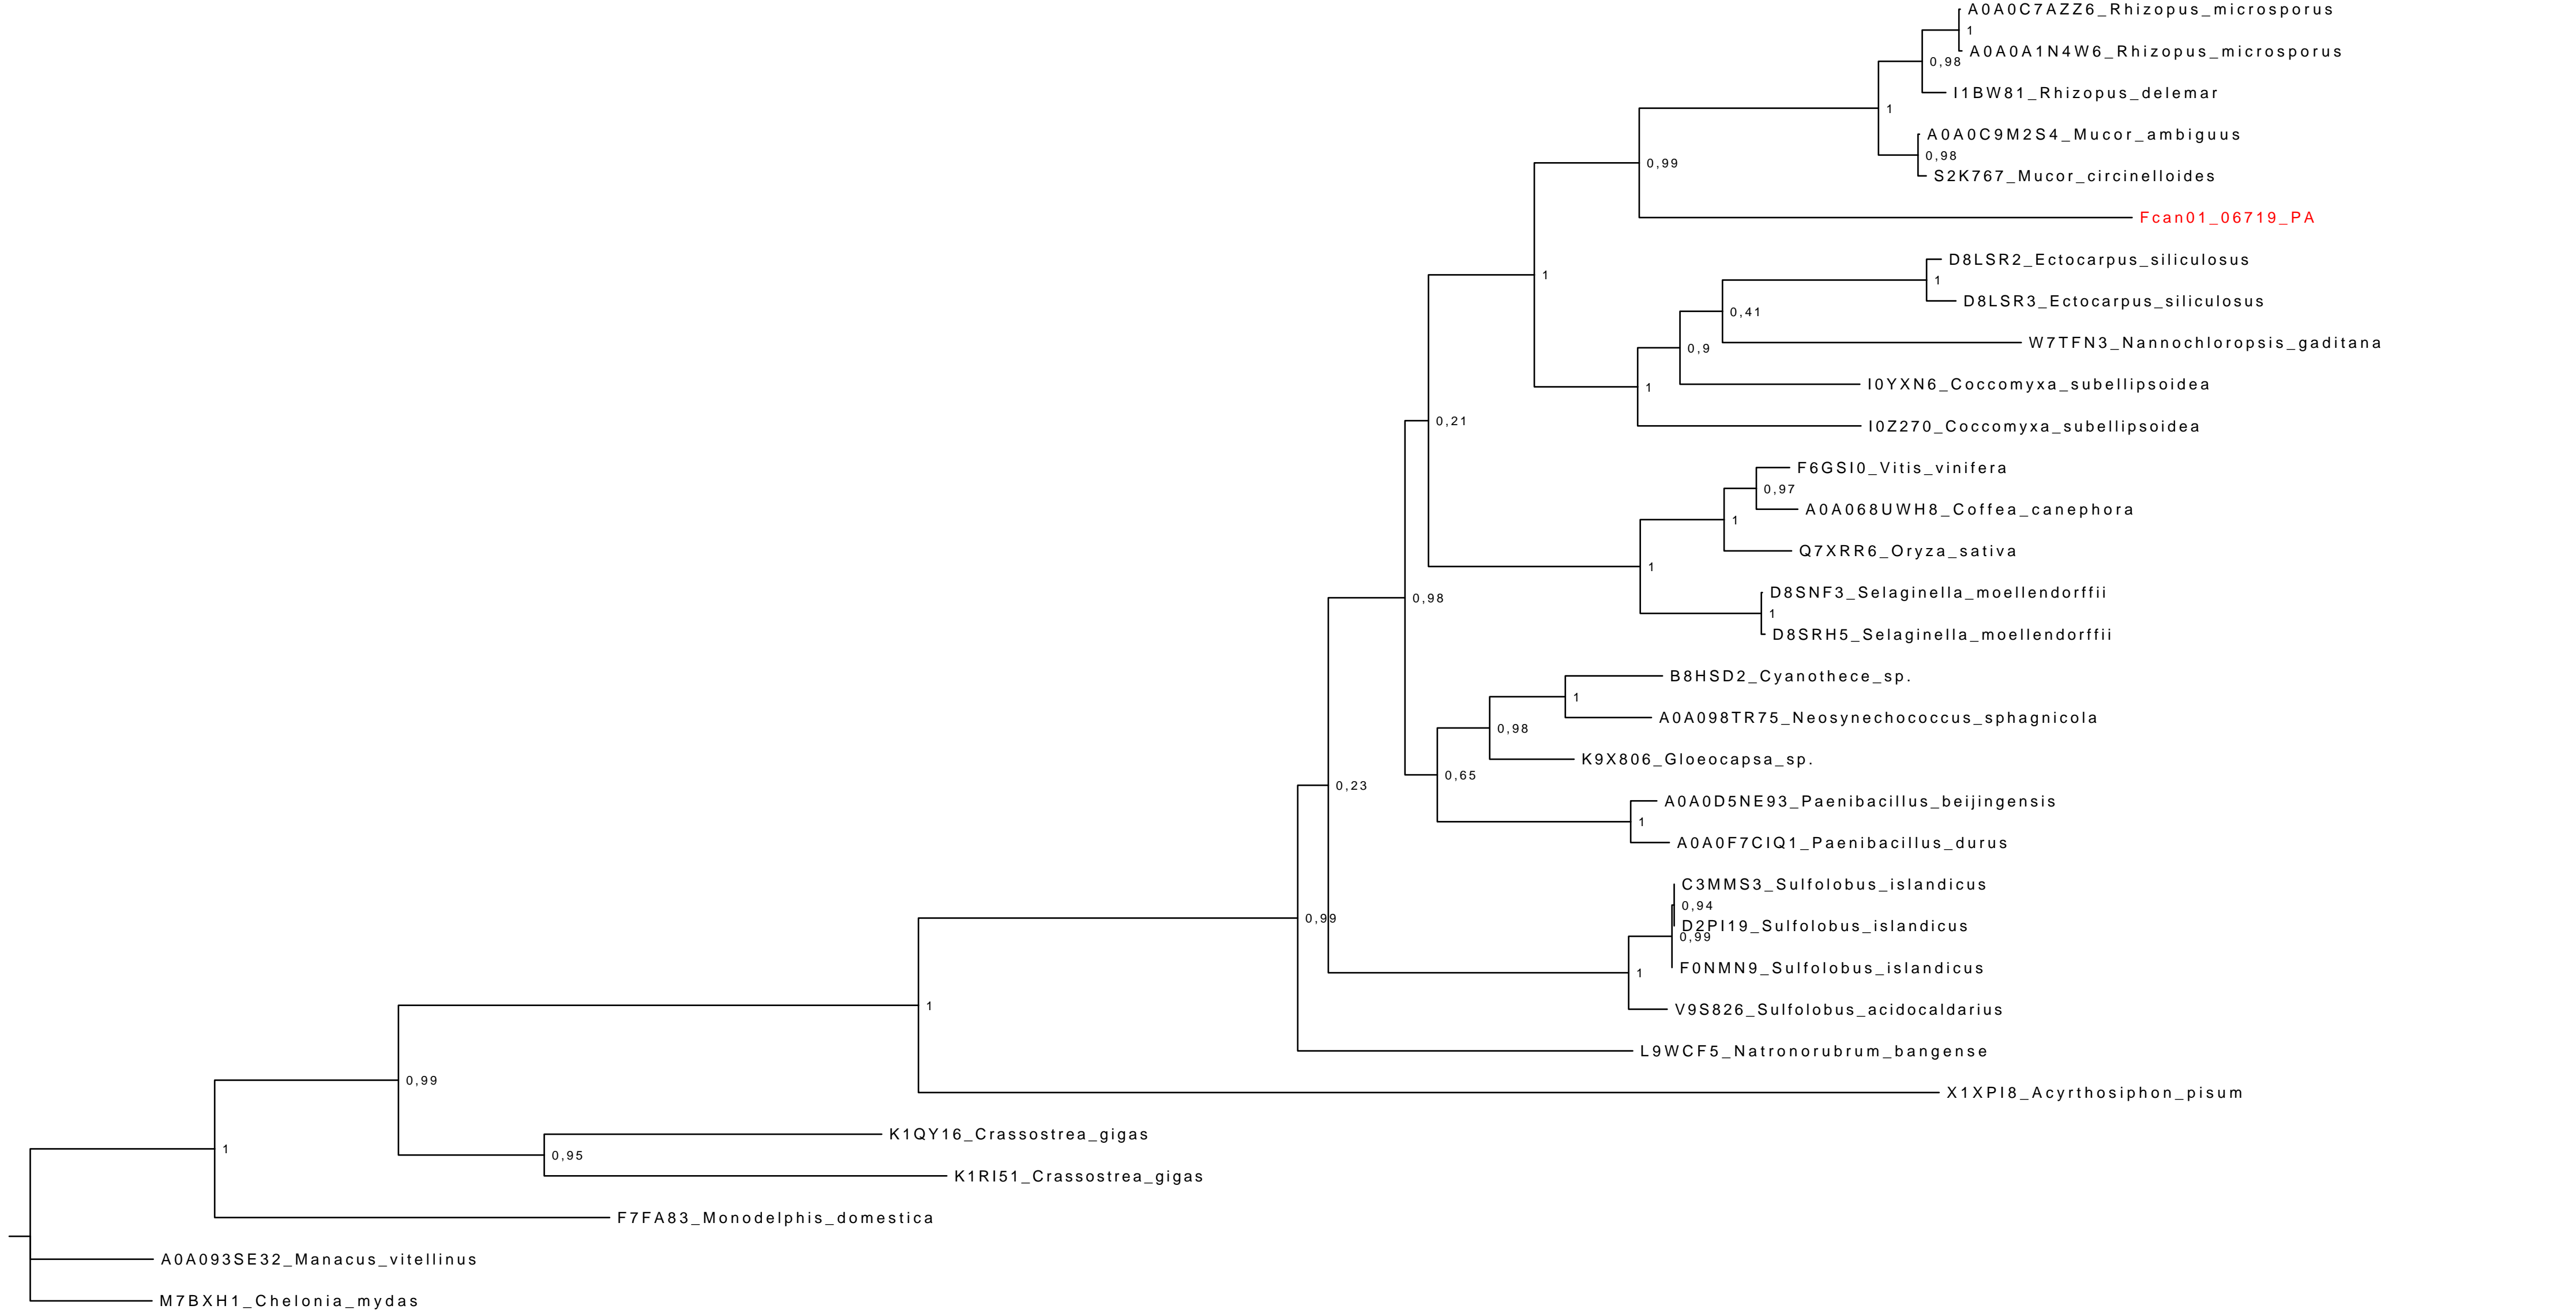

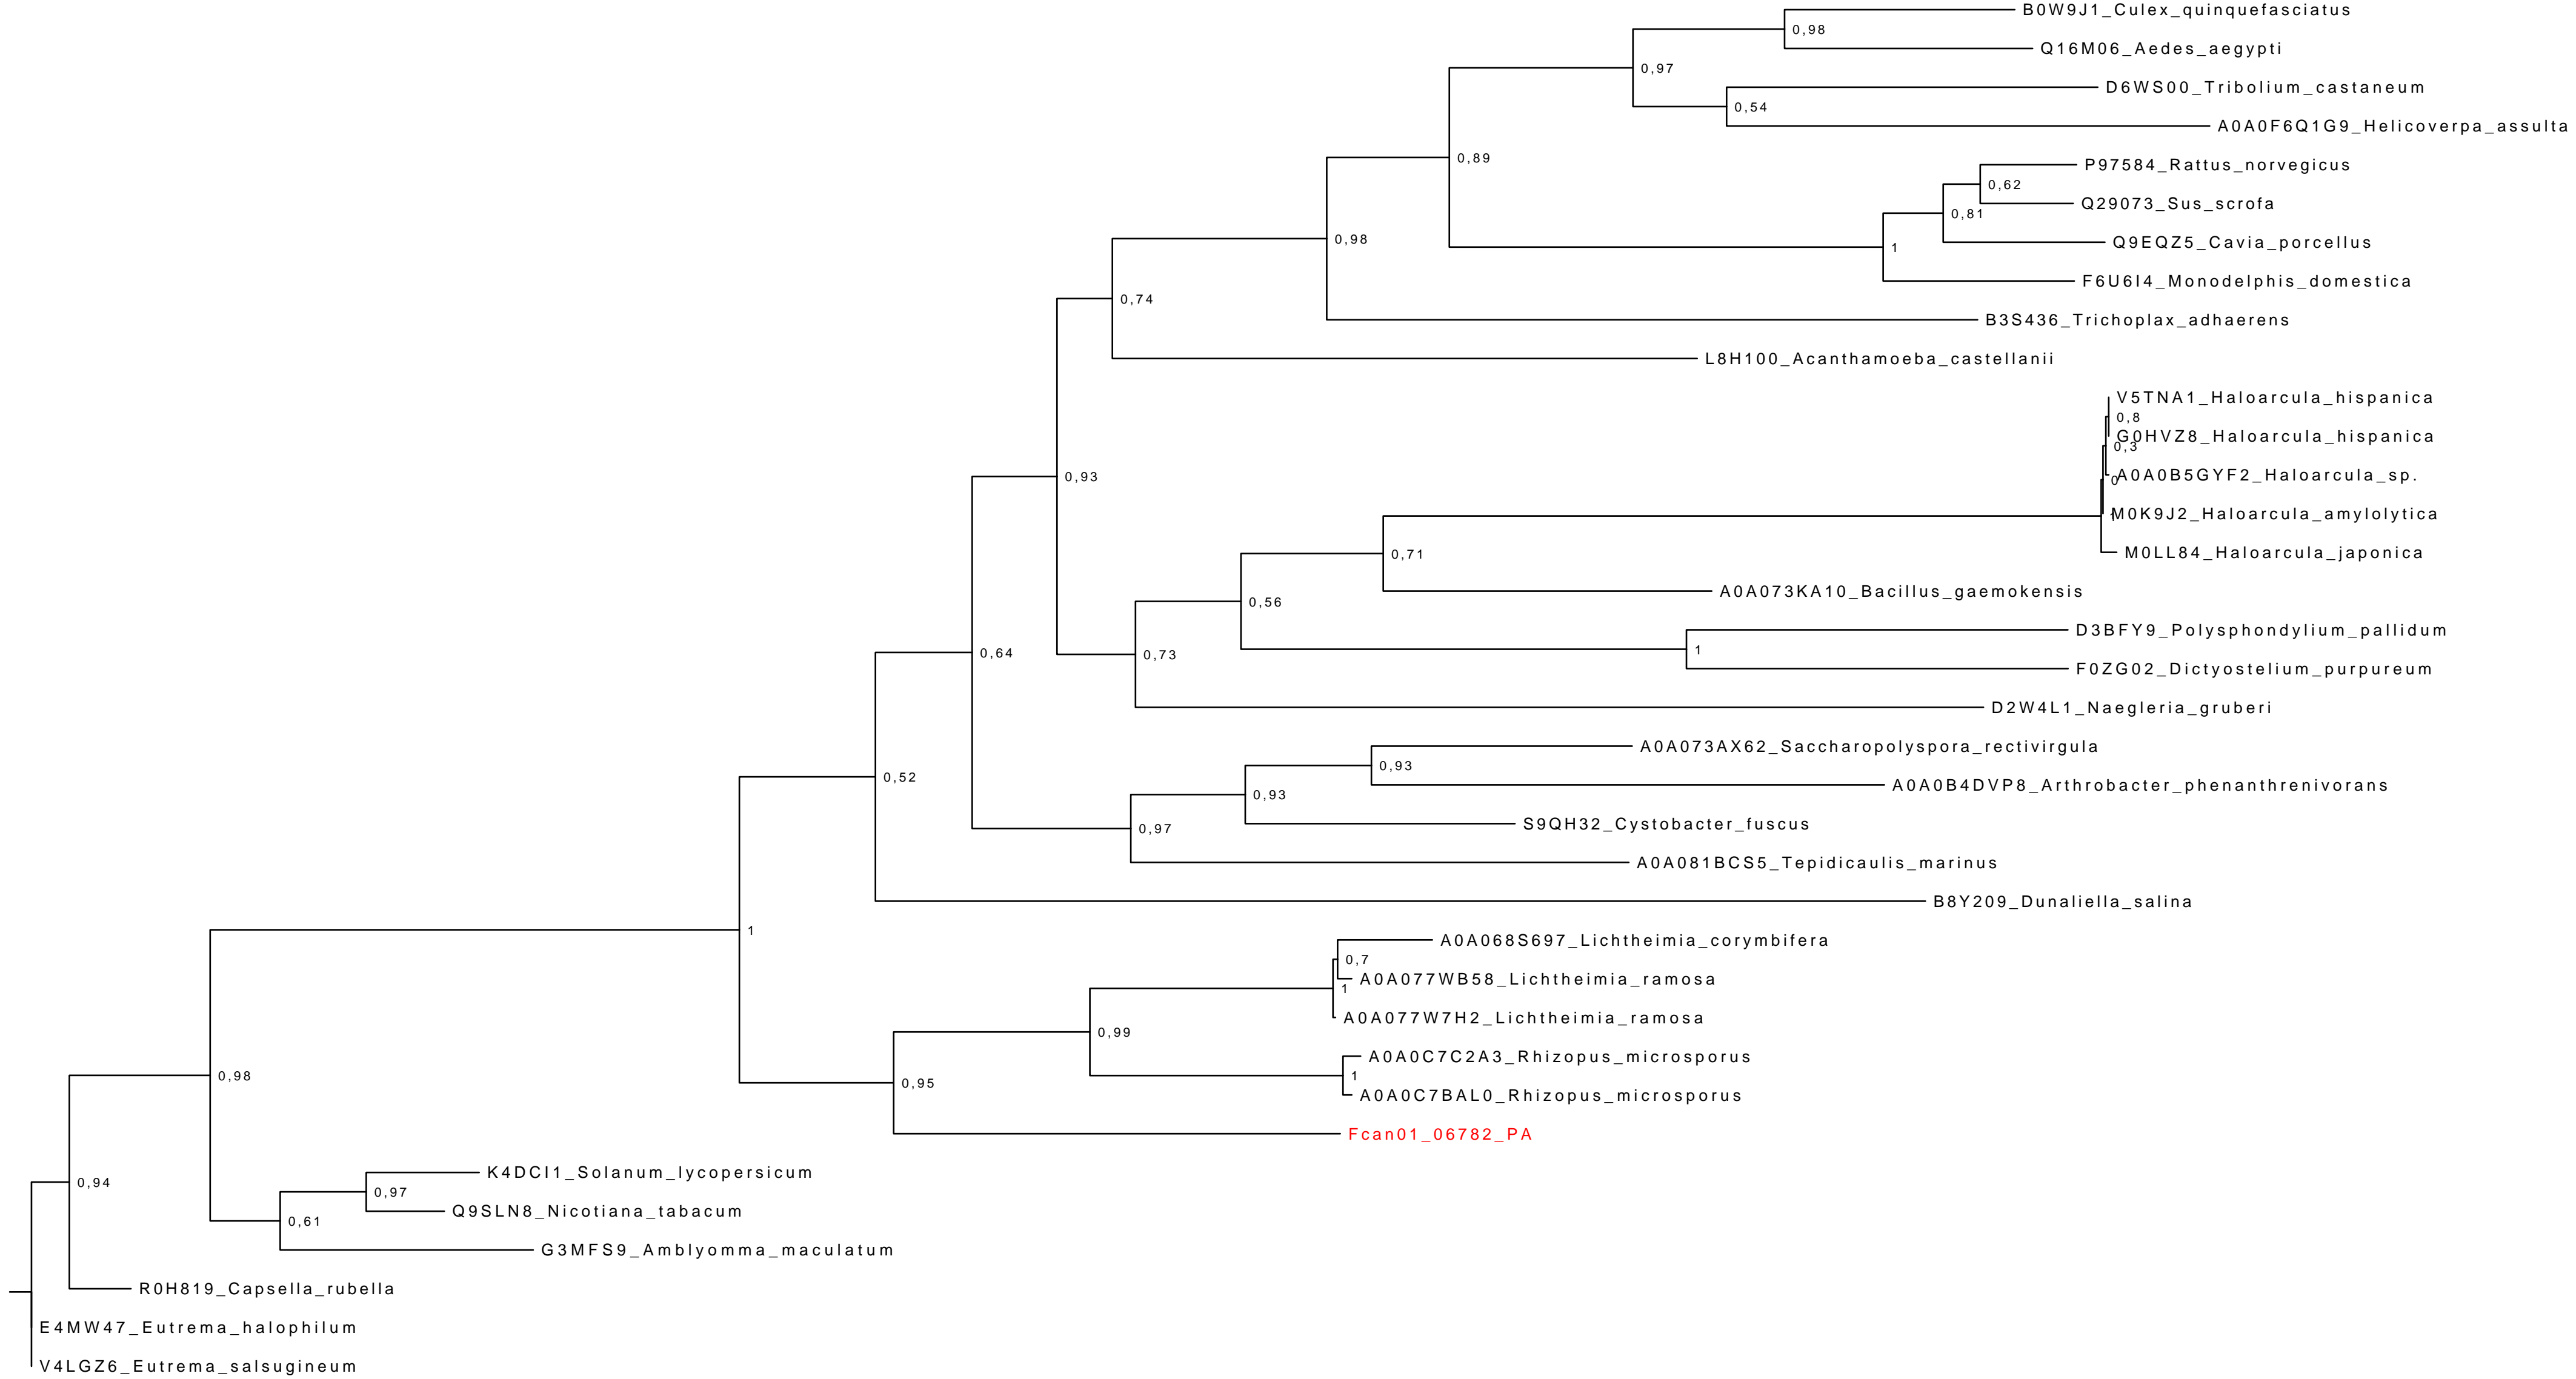

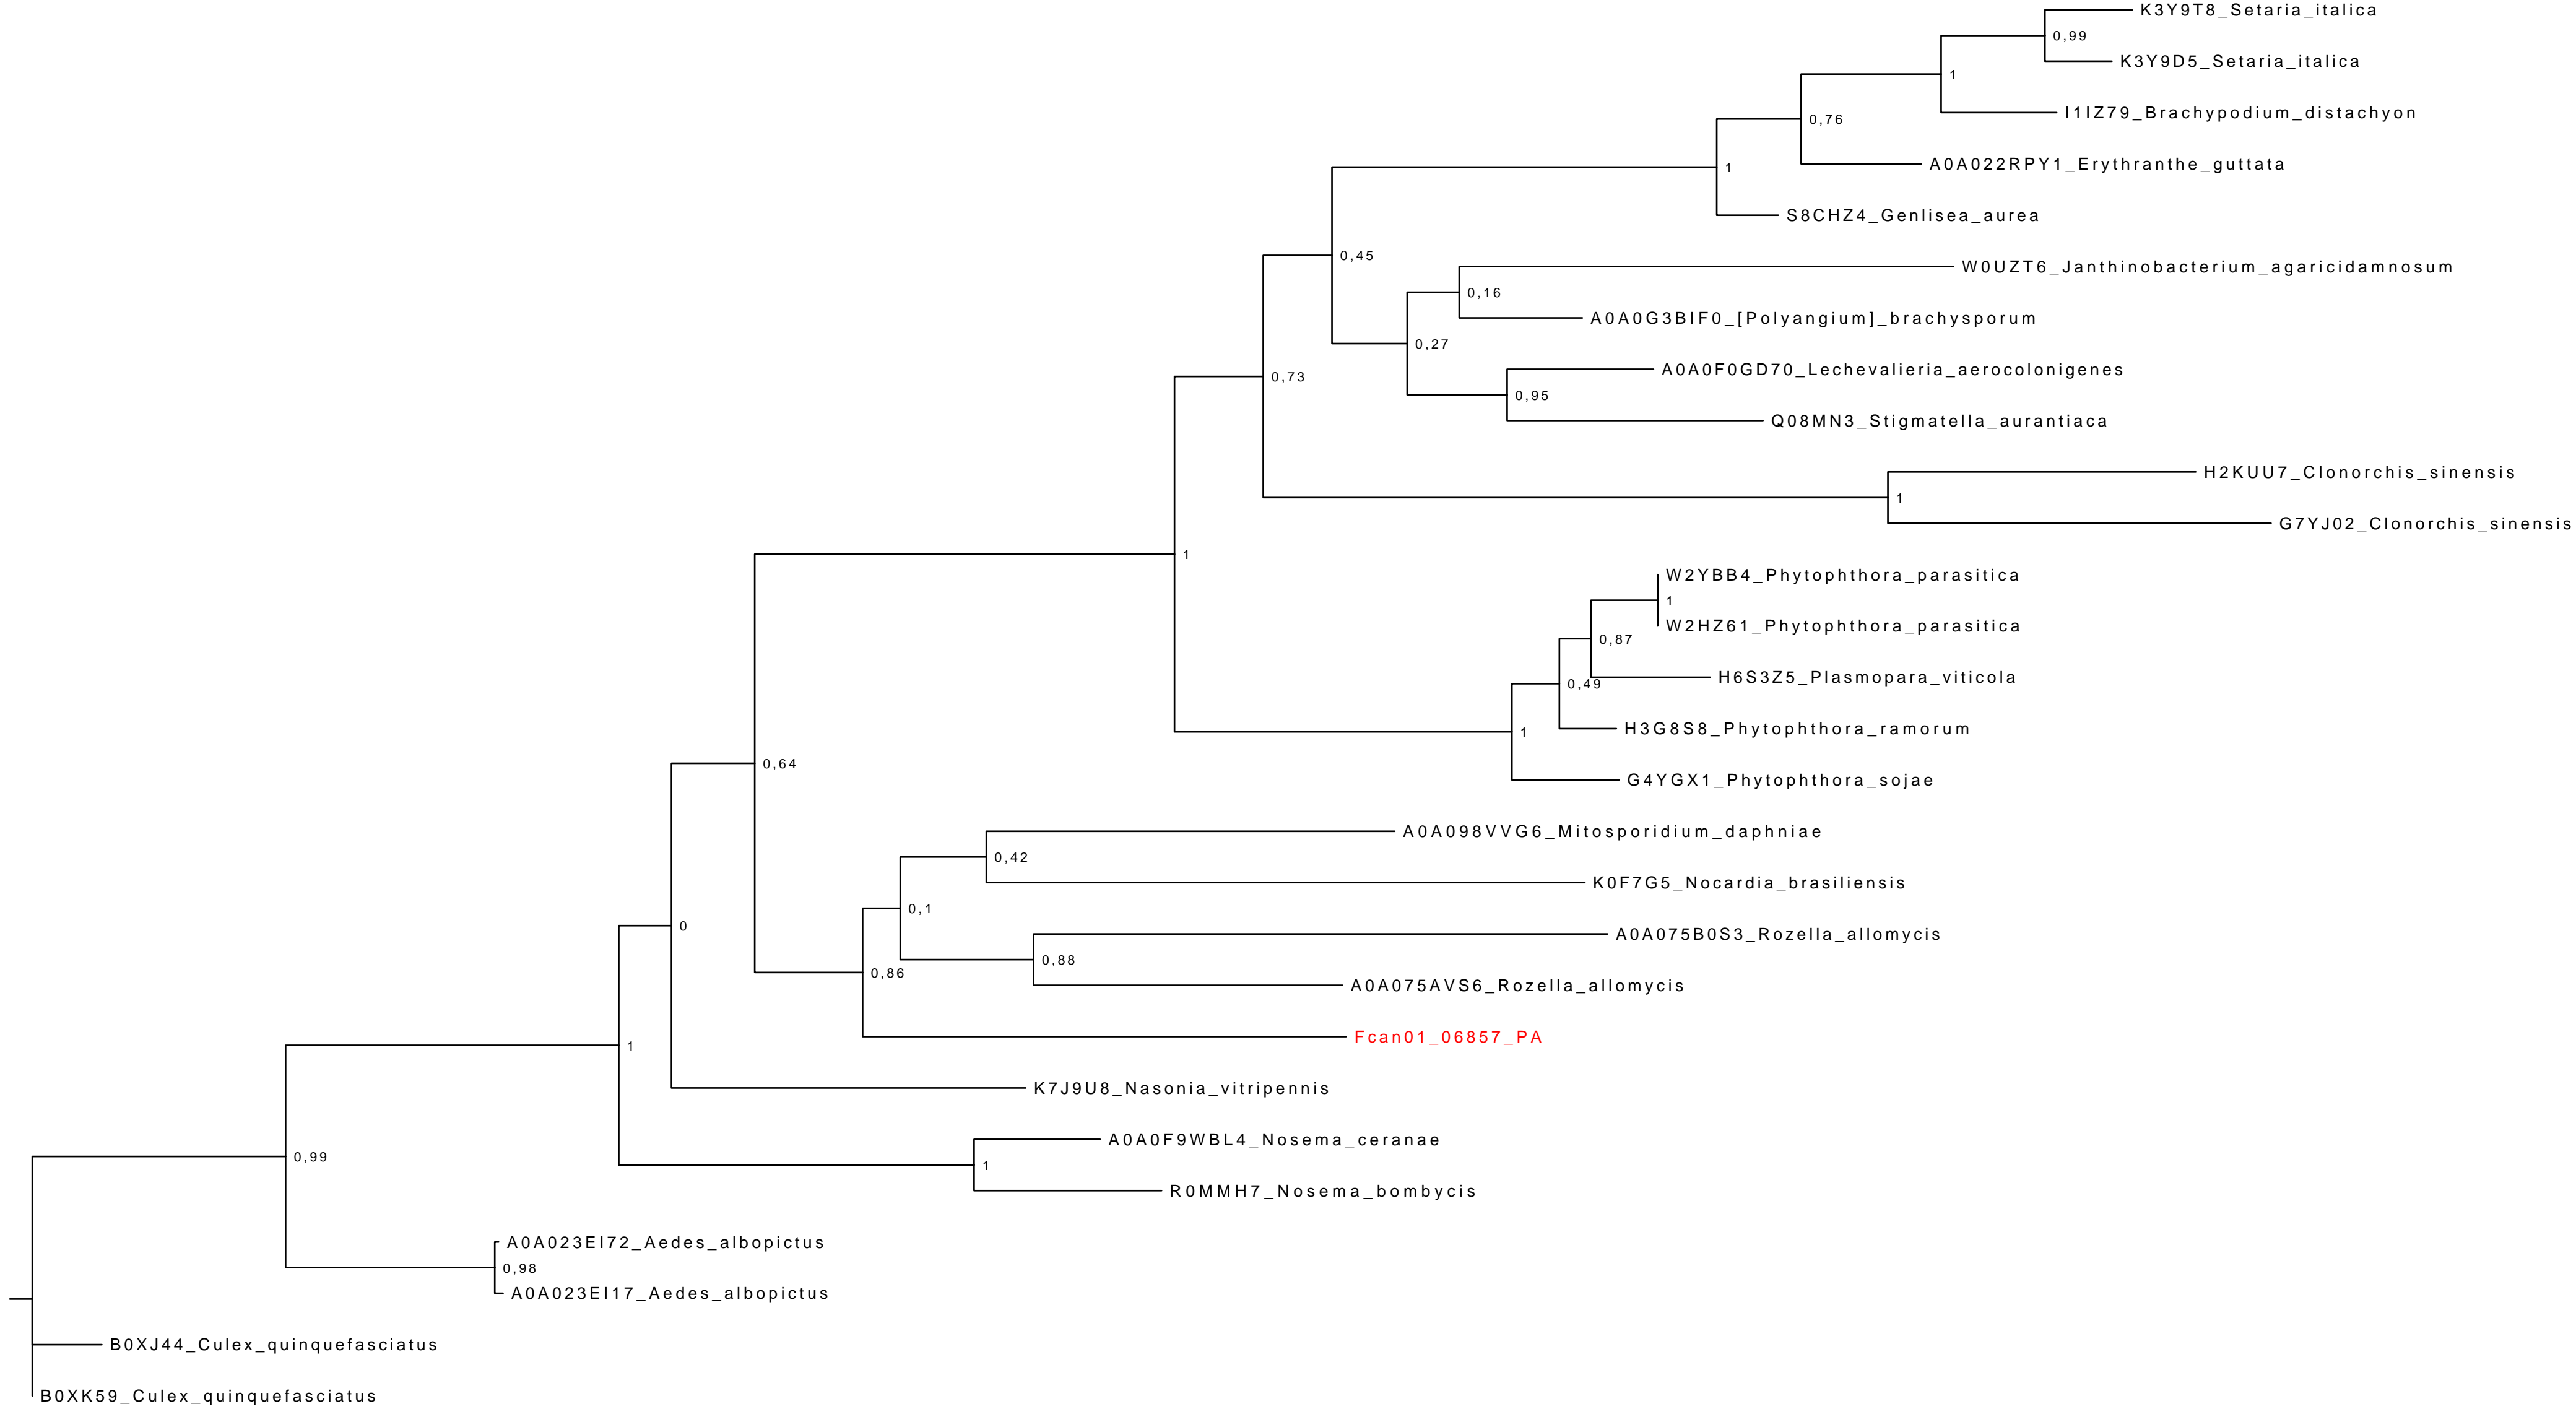

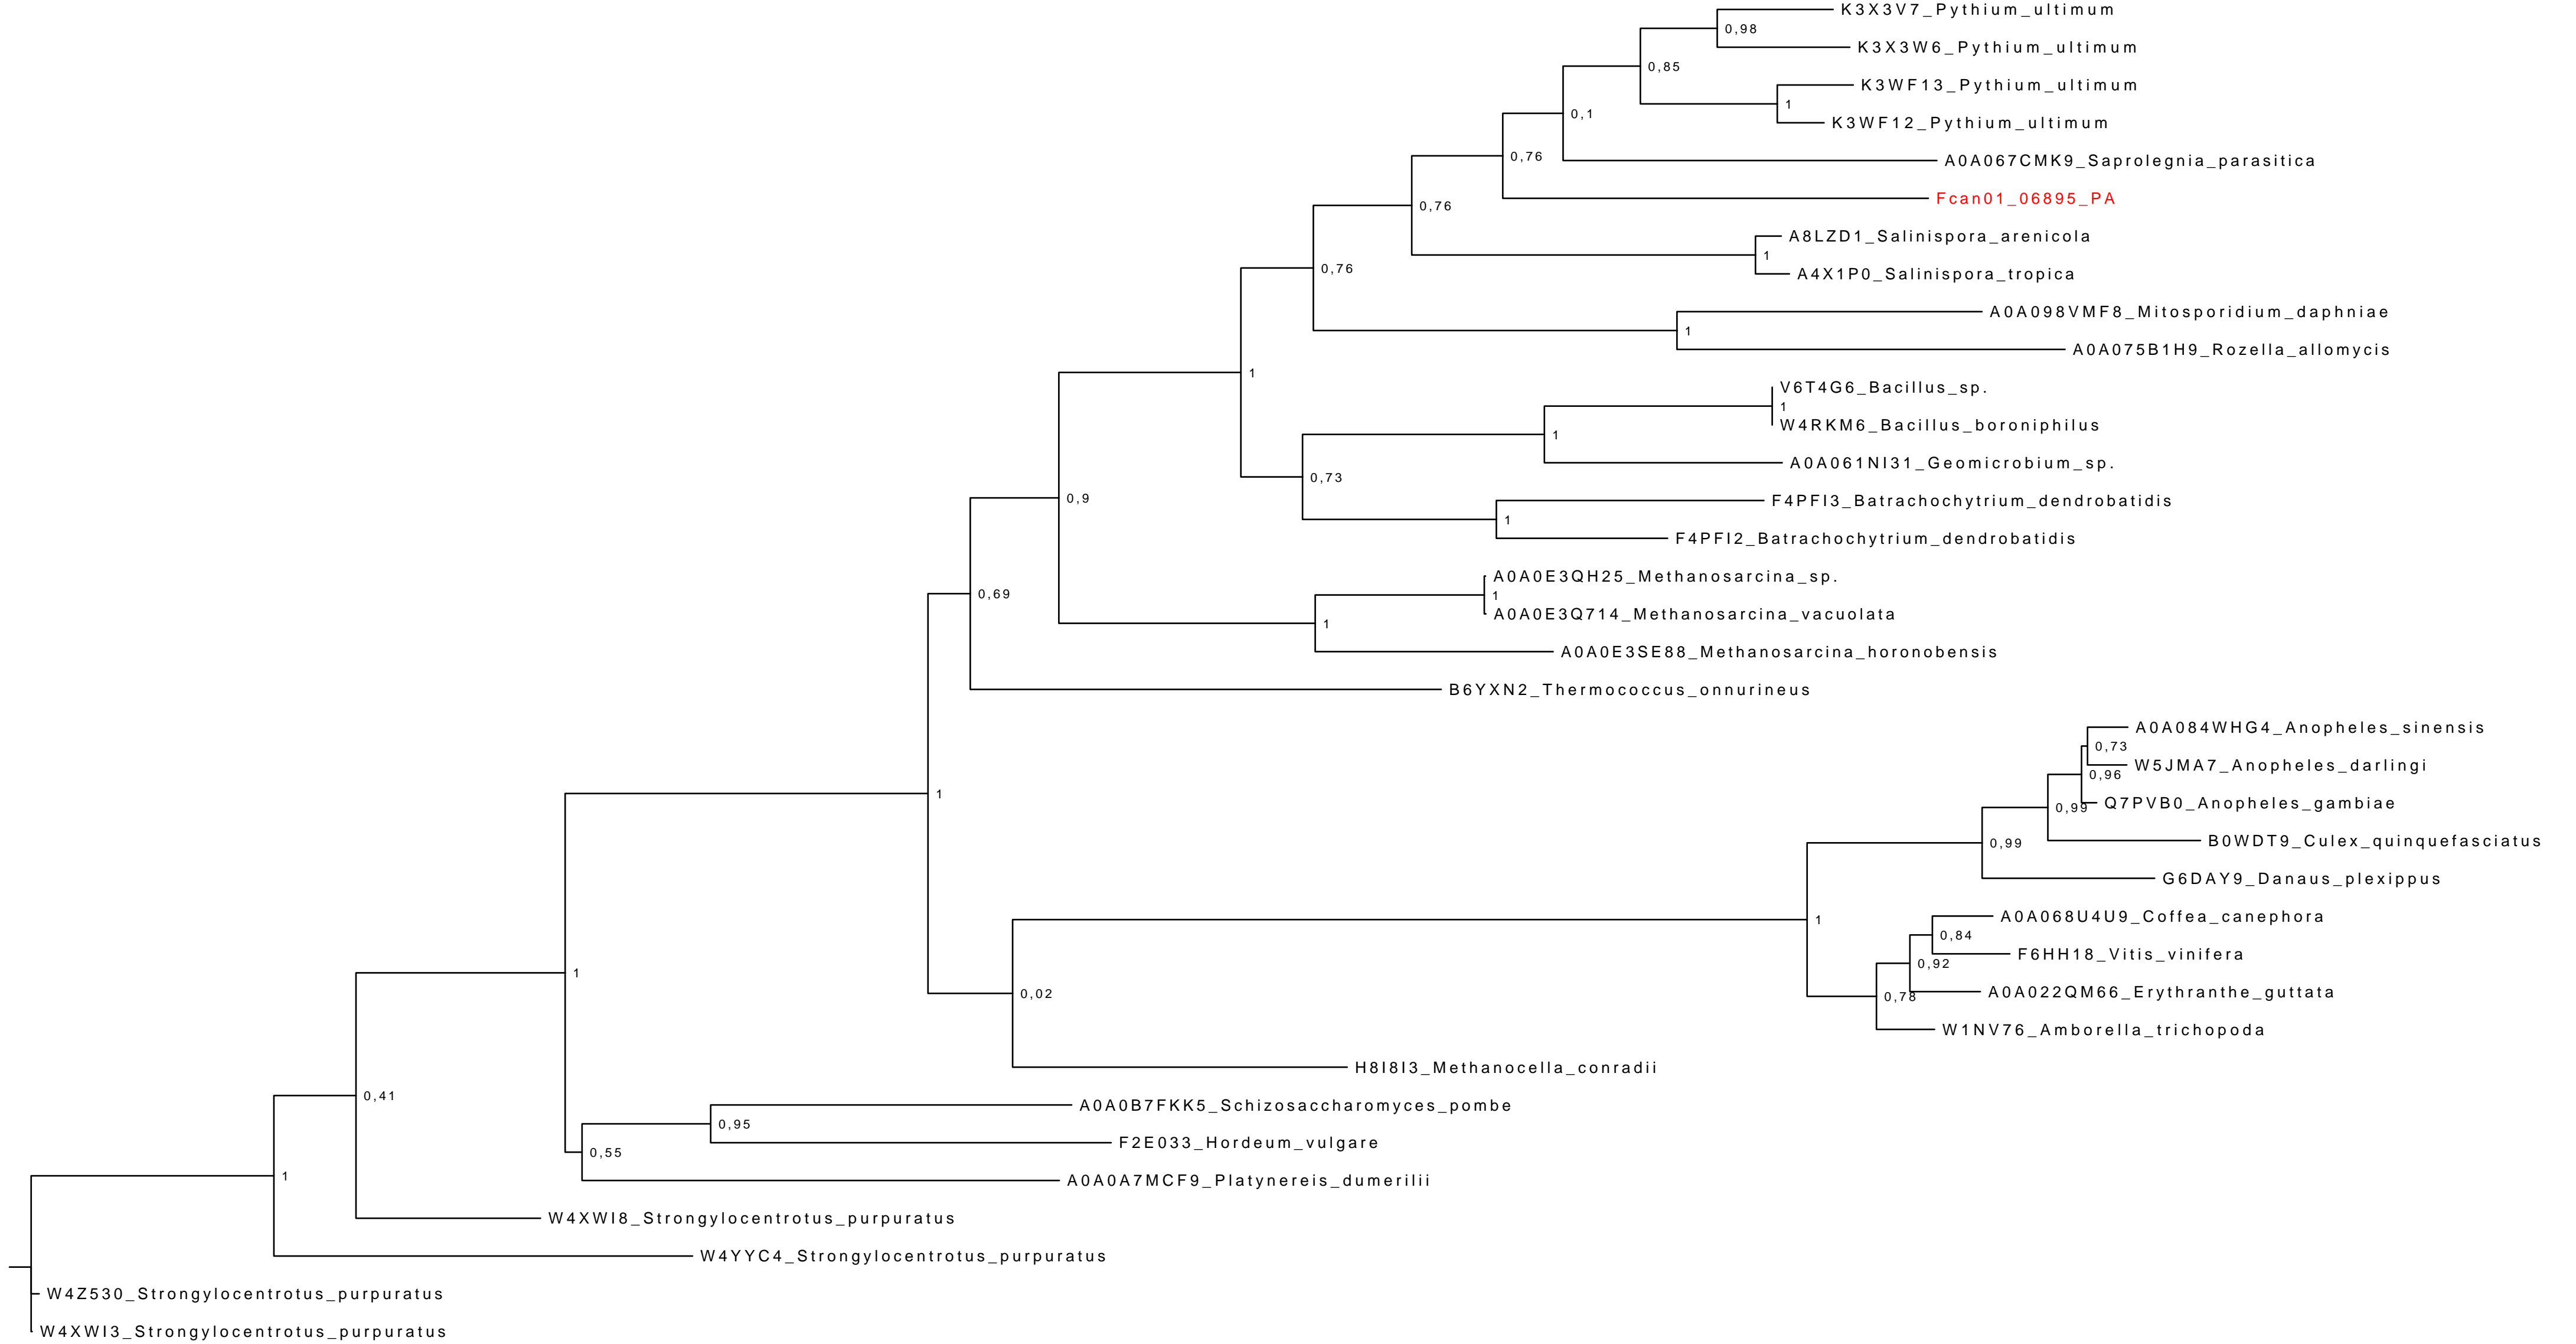

0.6

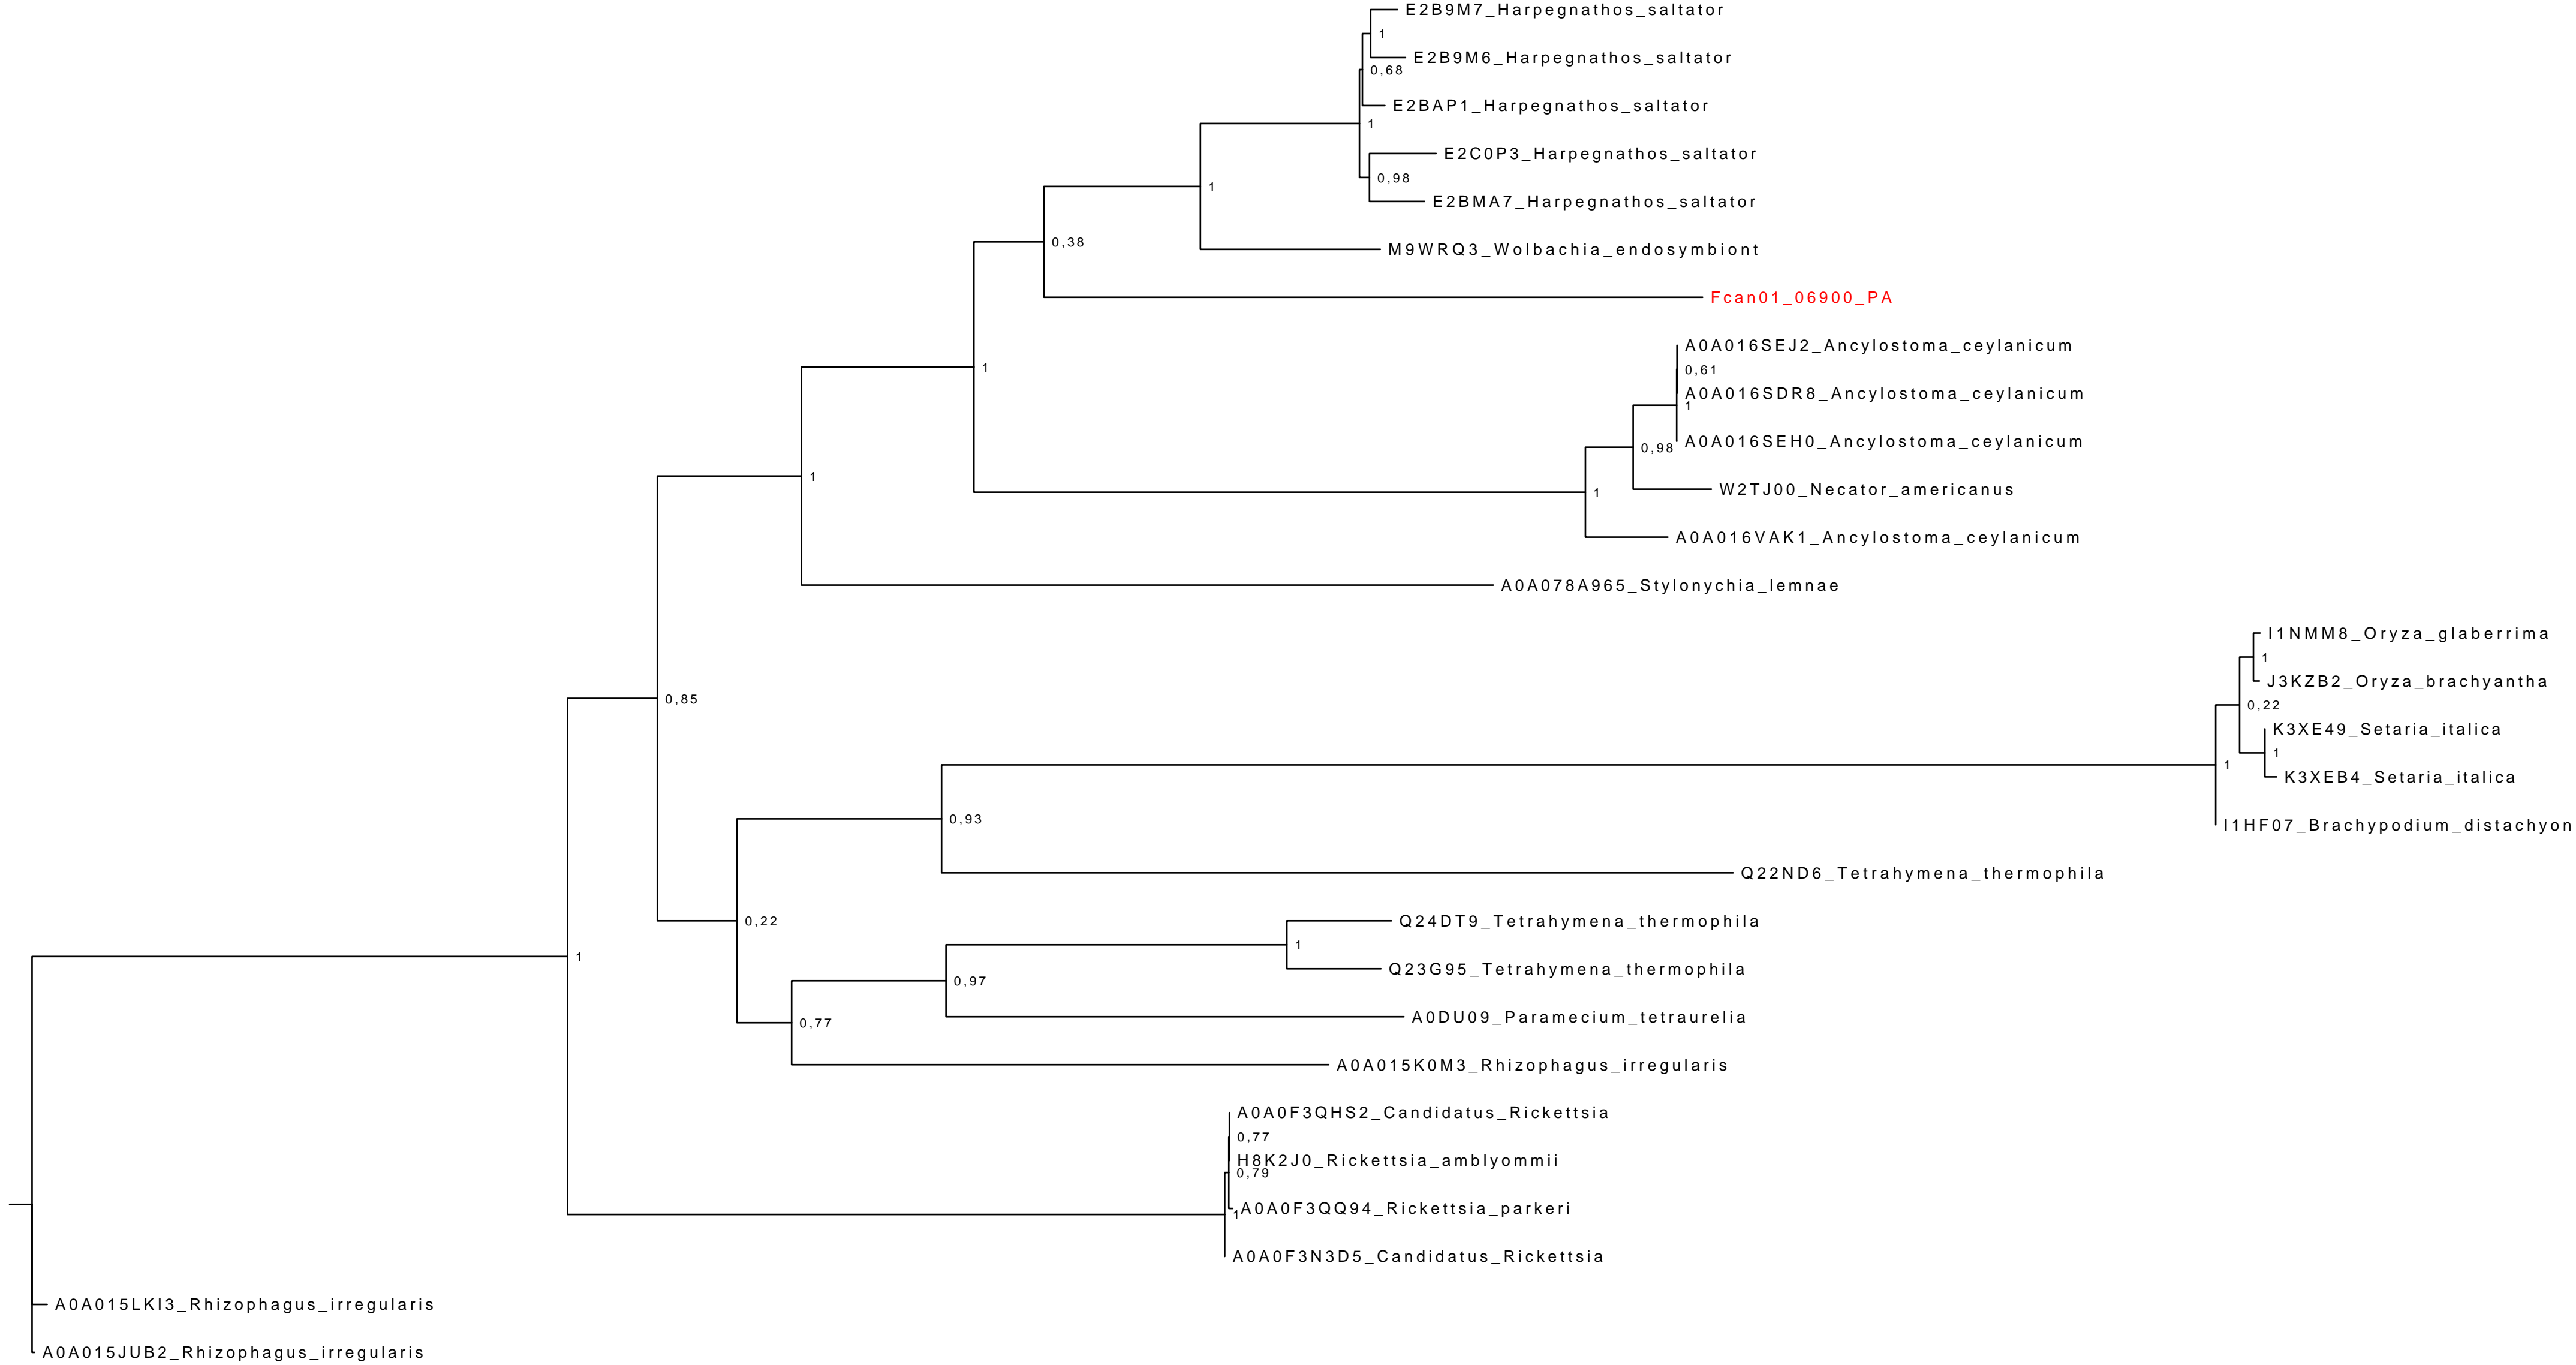

0.7

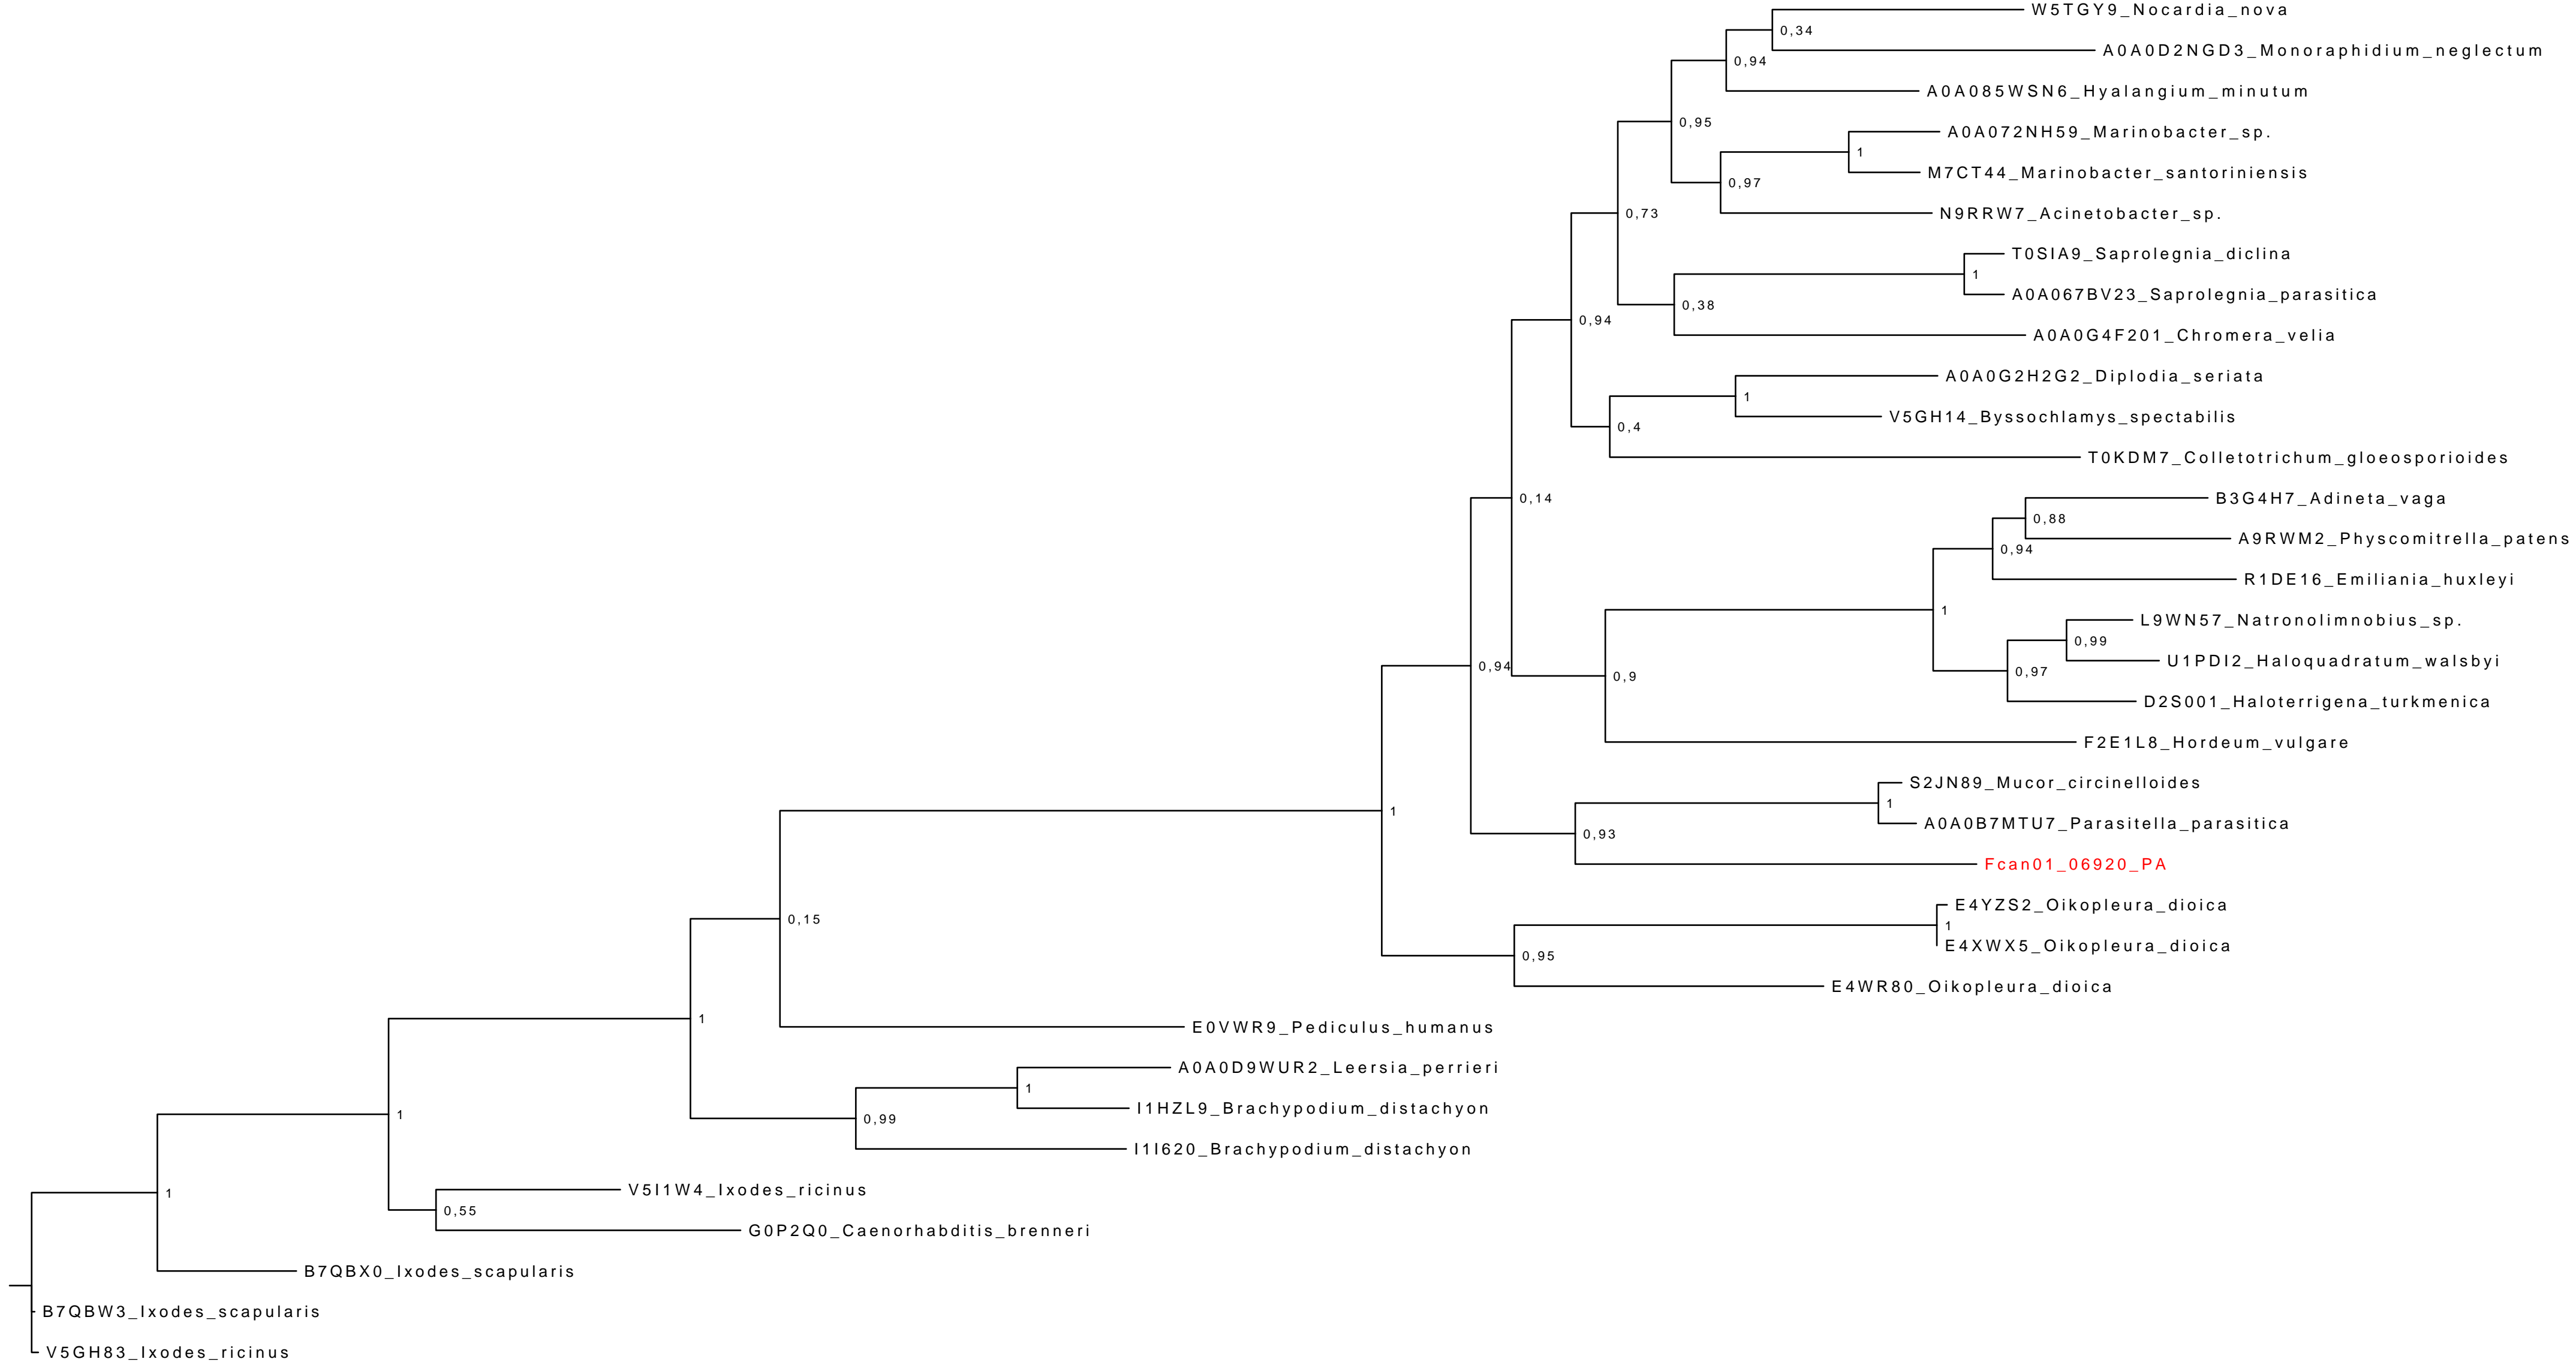

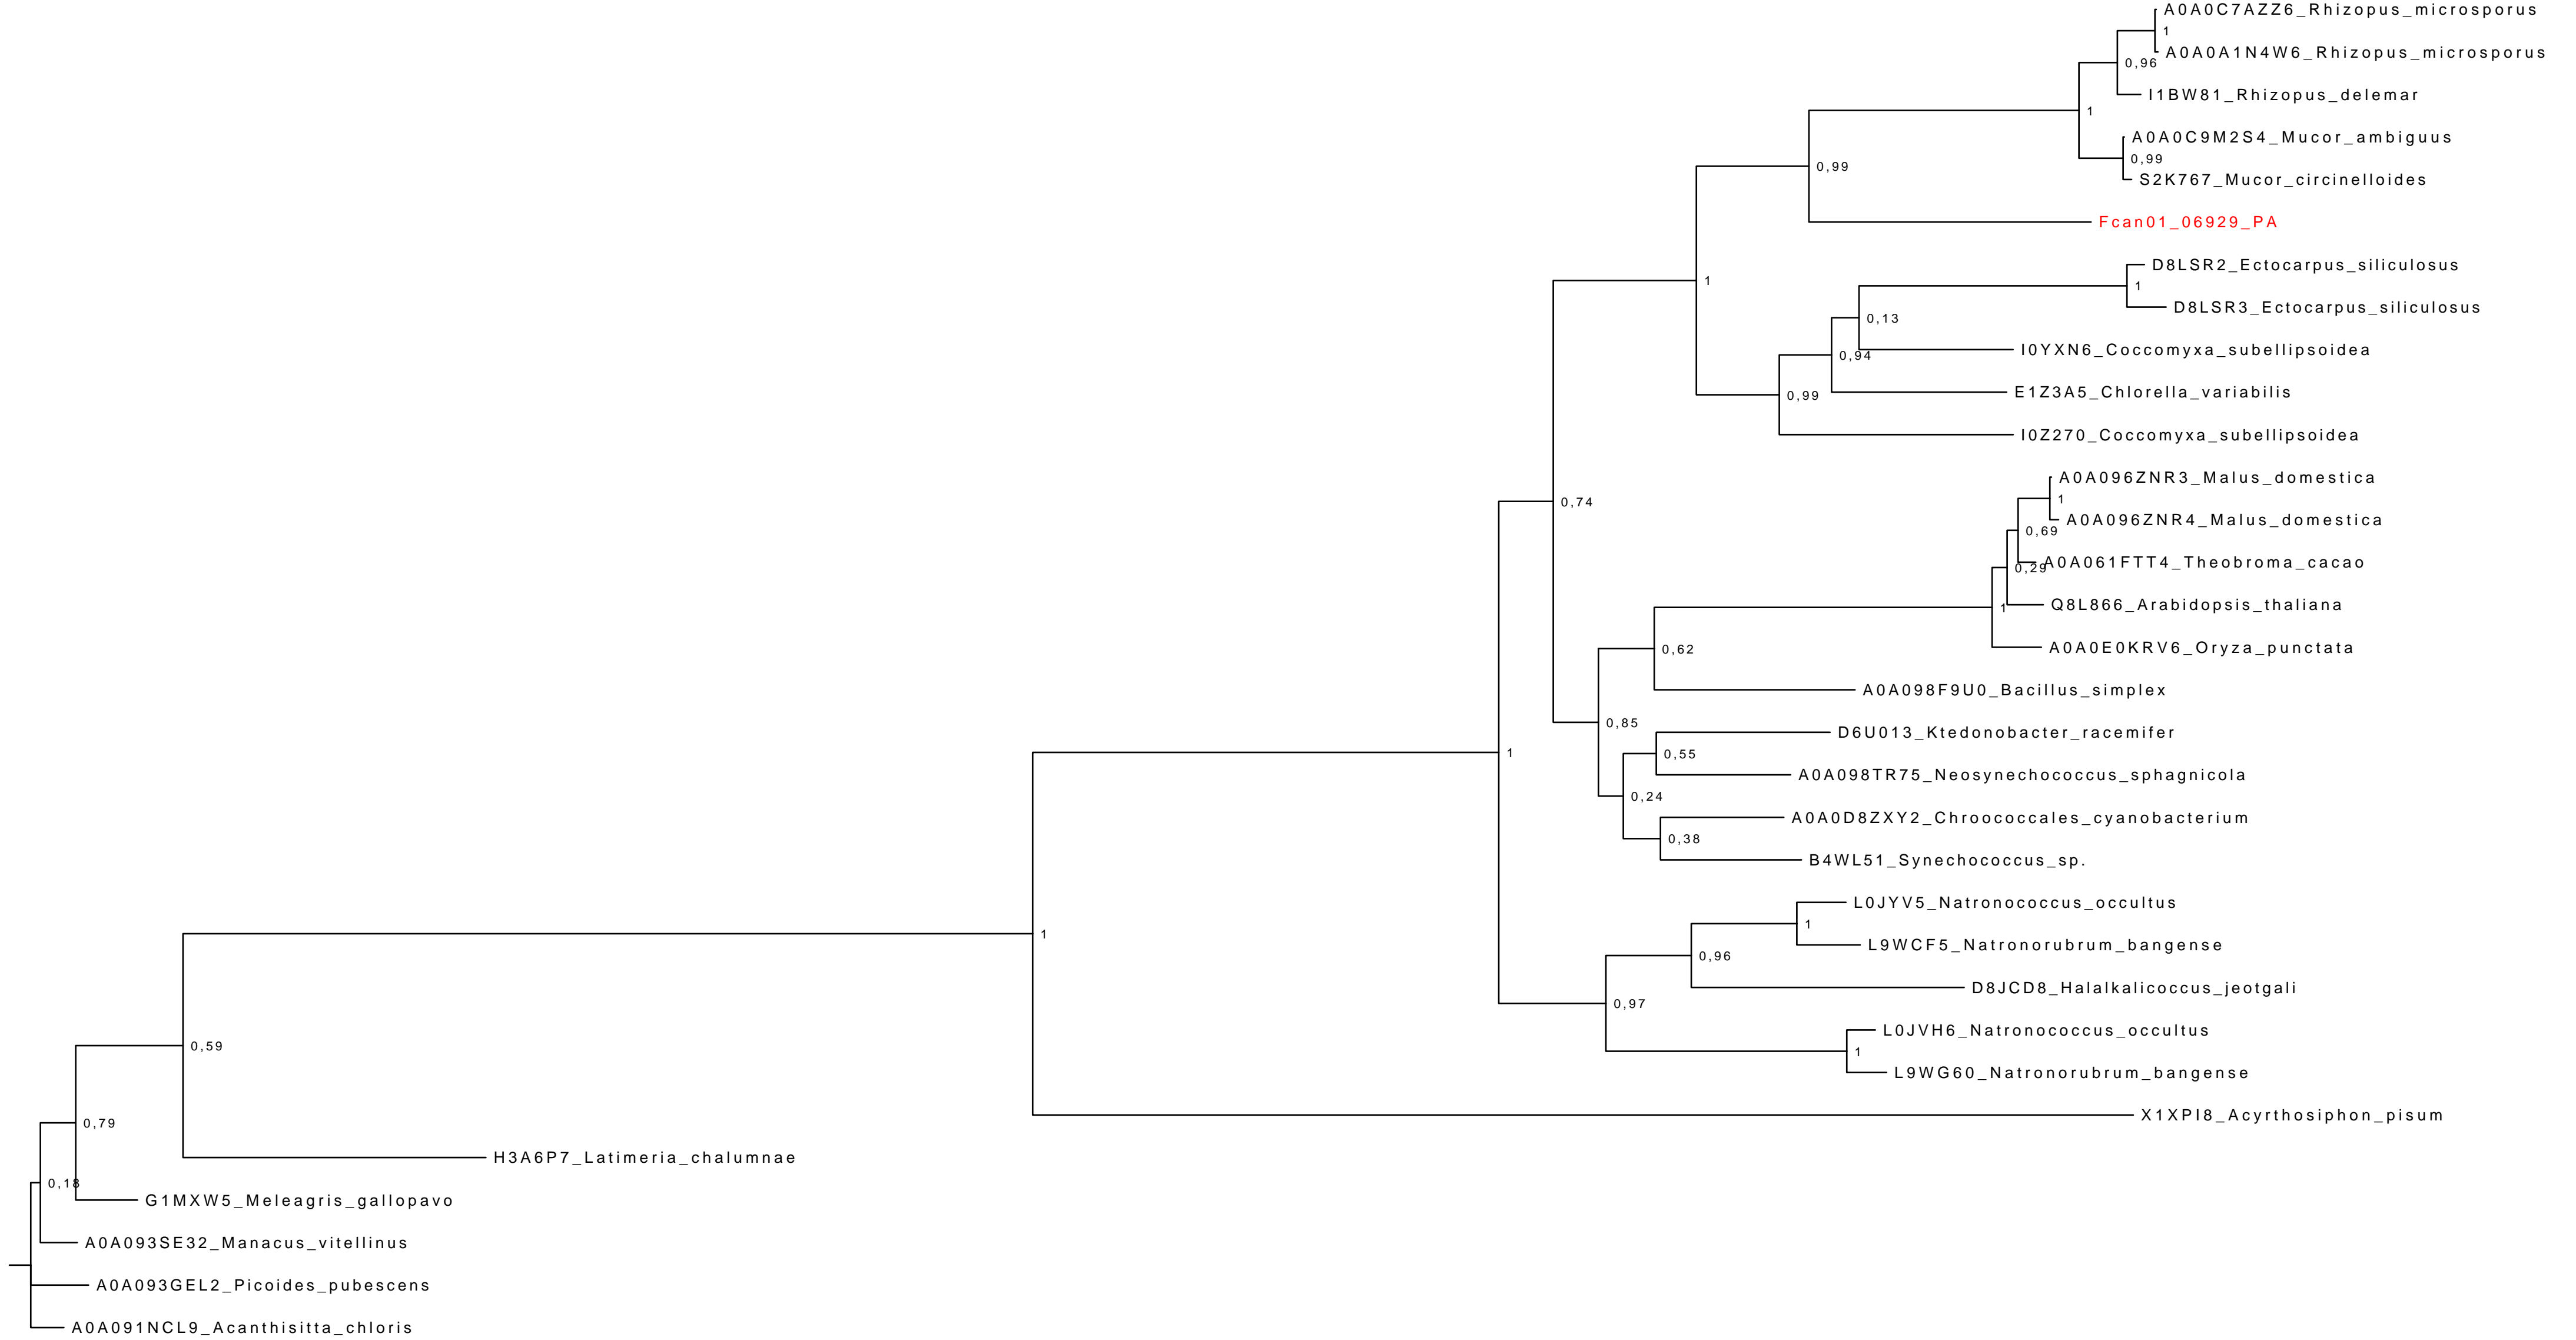

0.5

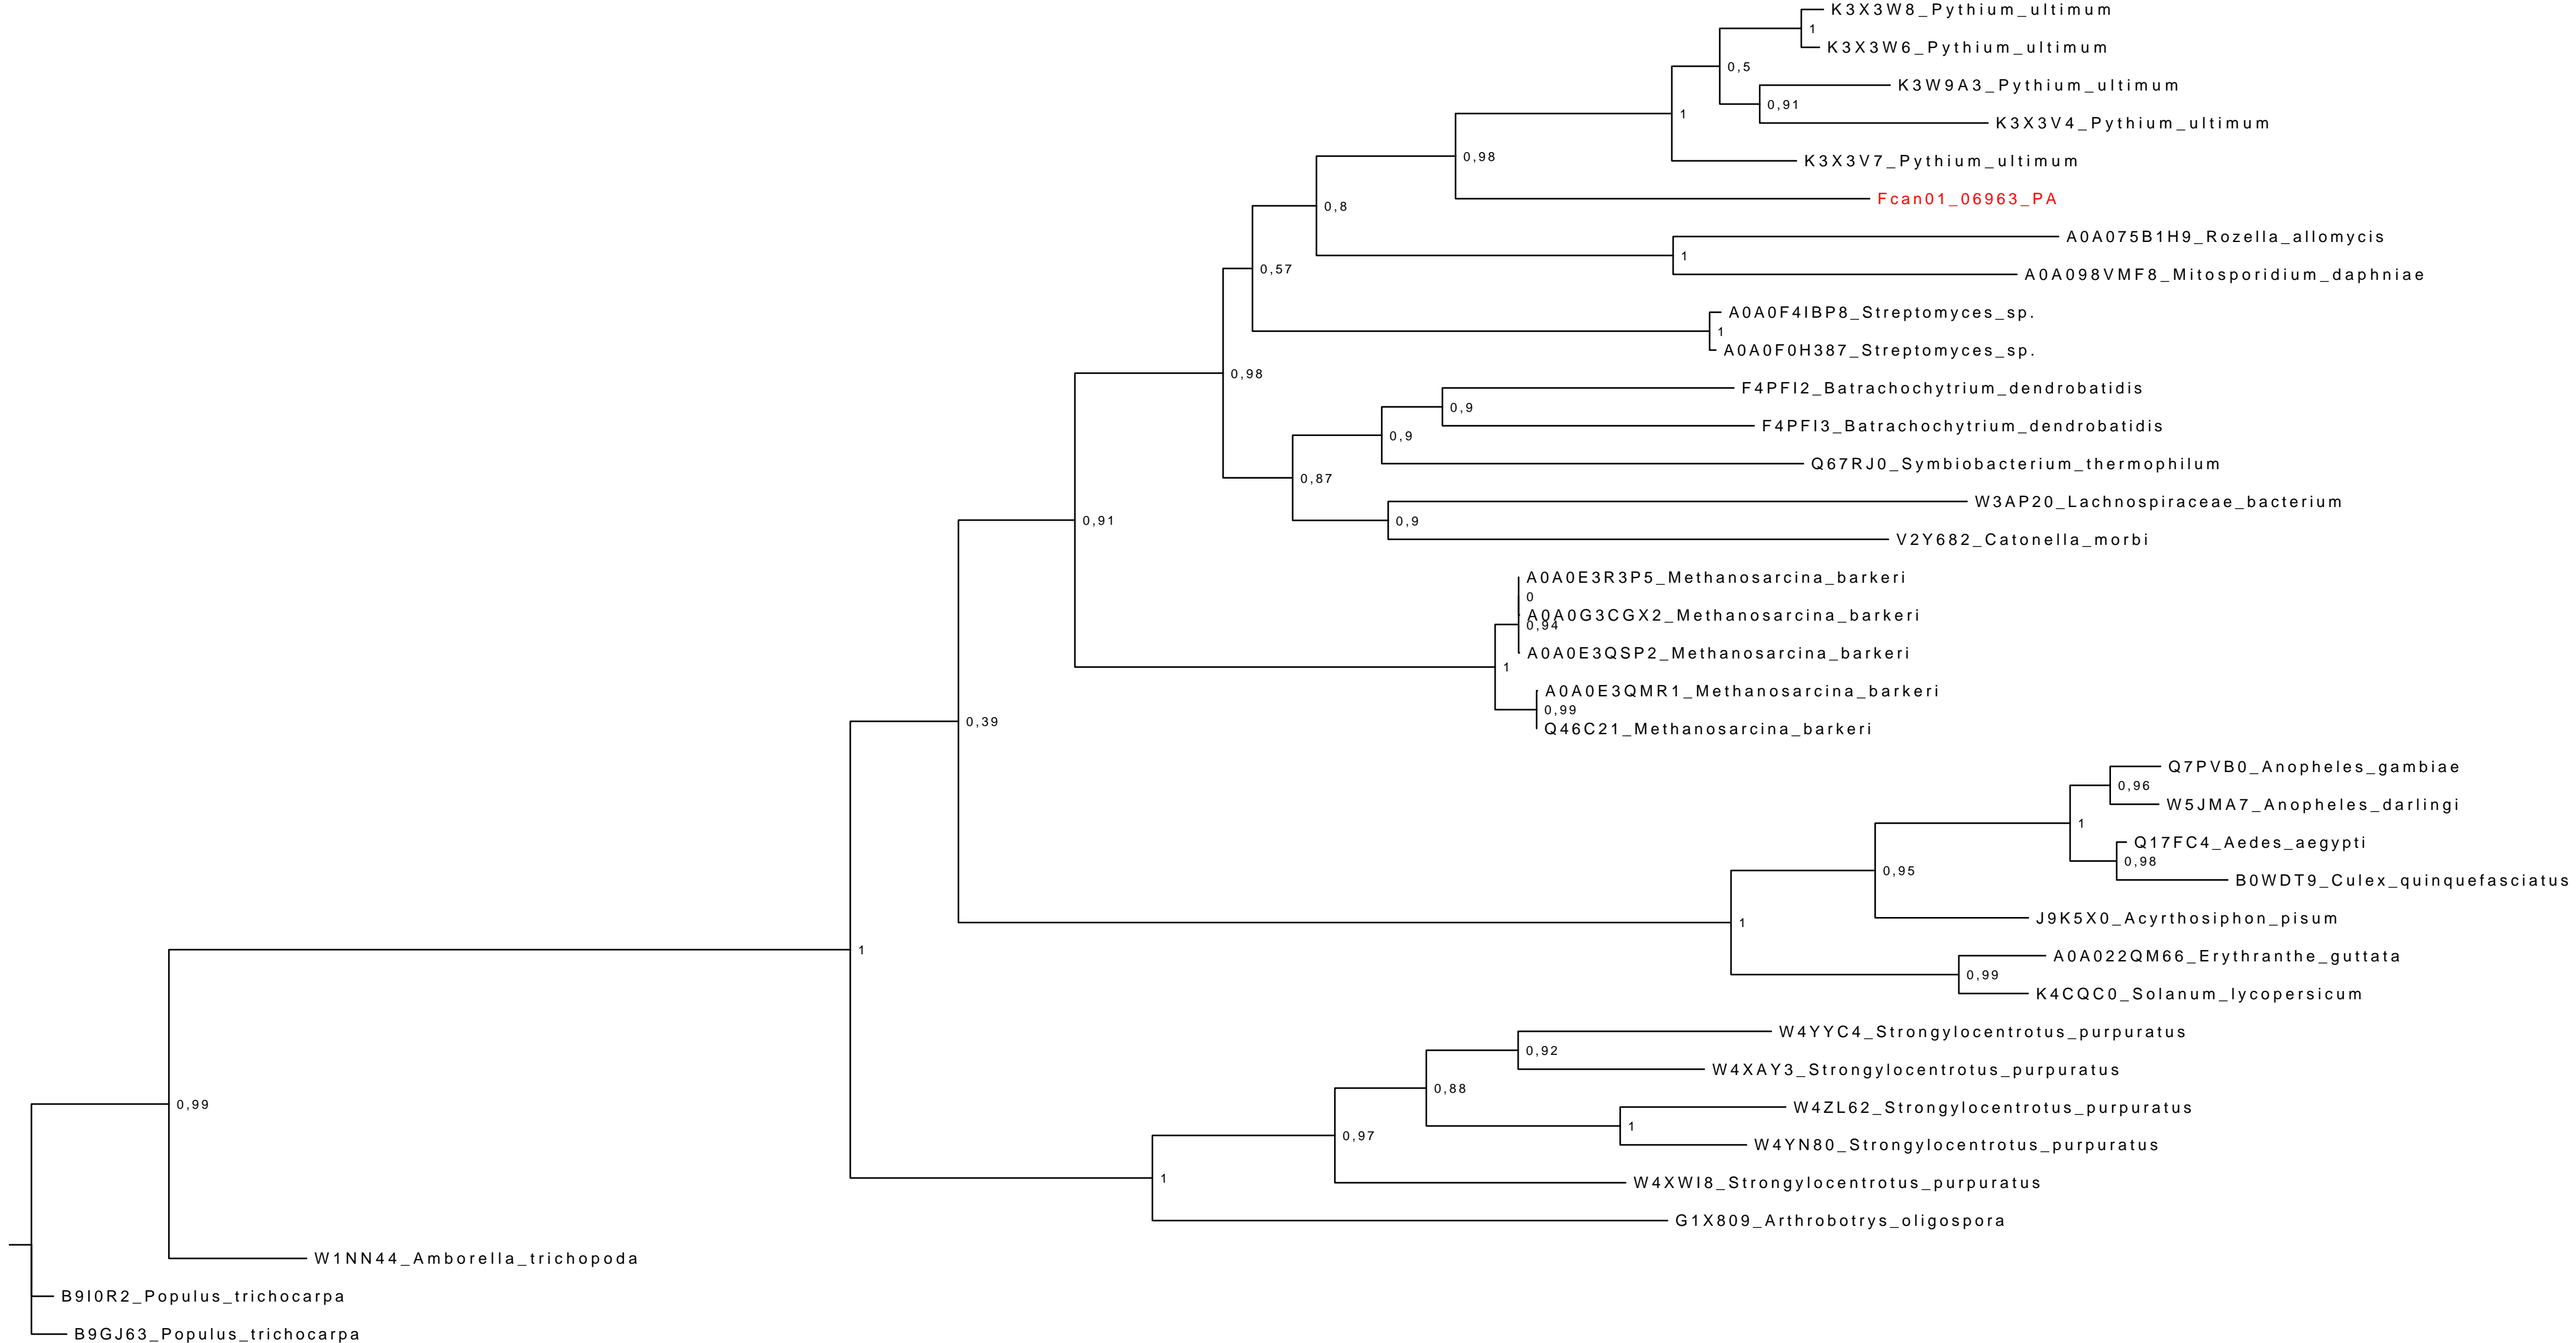



Fcan01\_07010\_PA

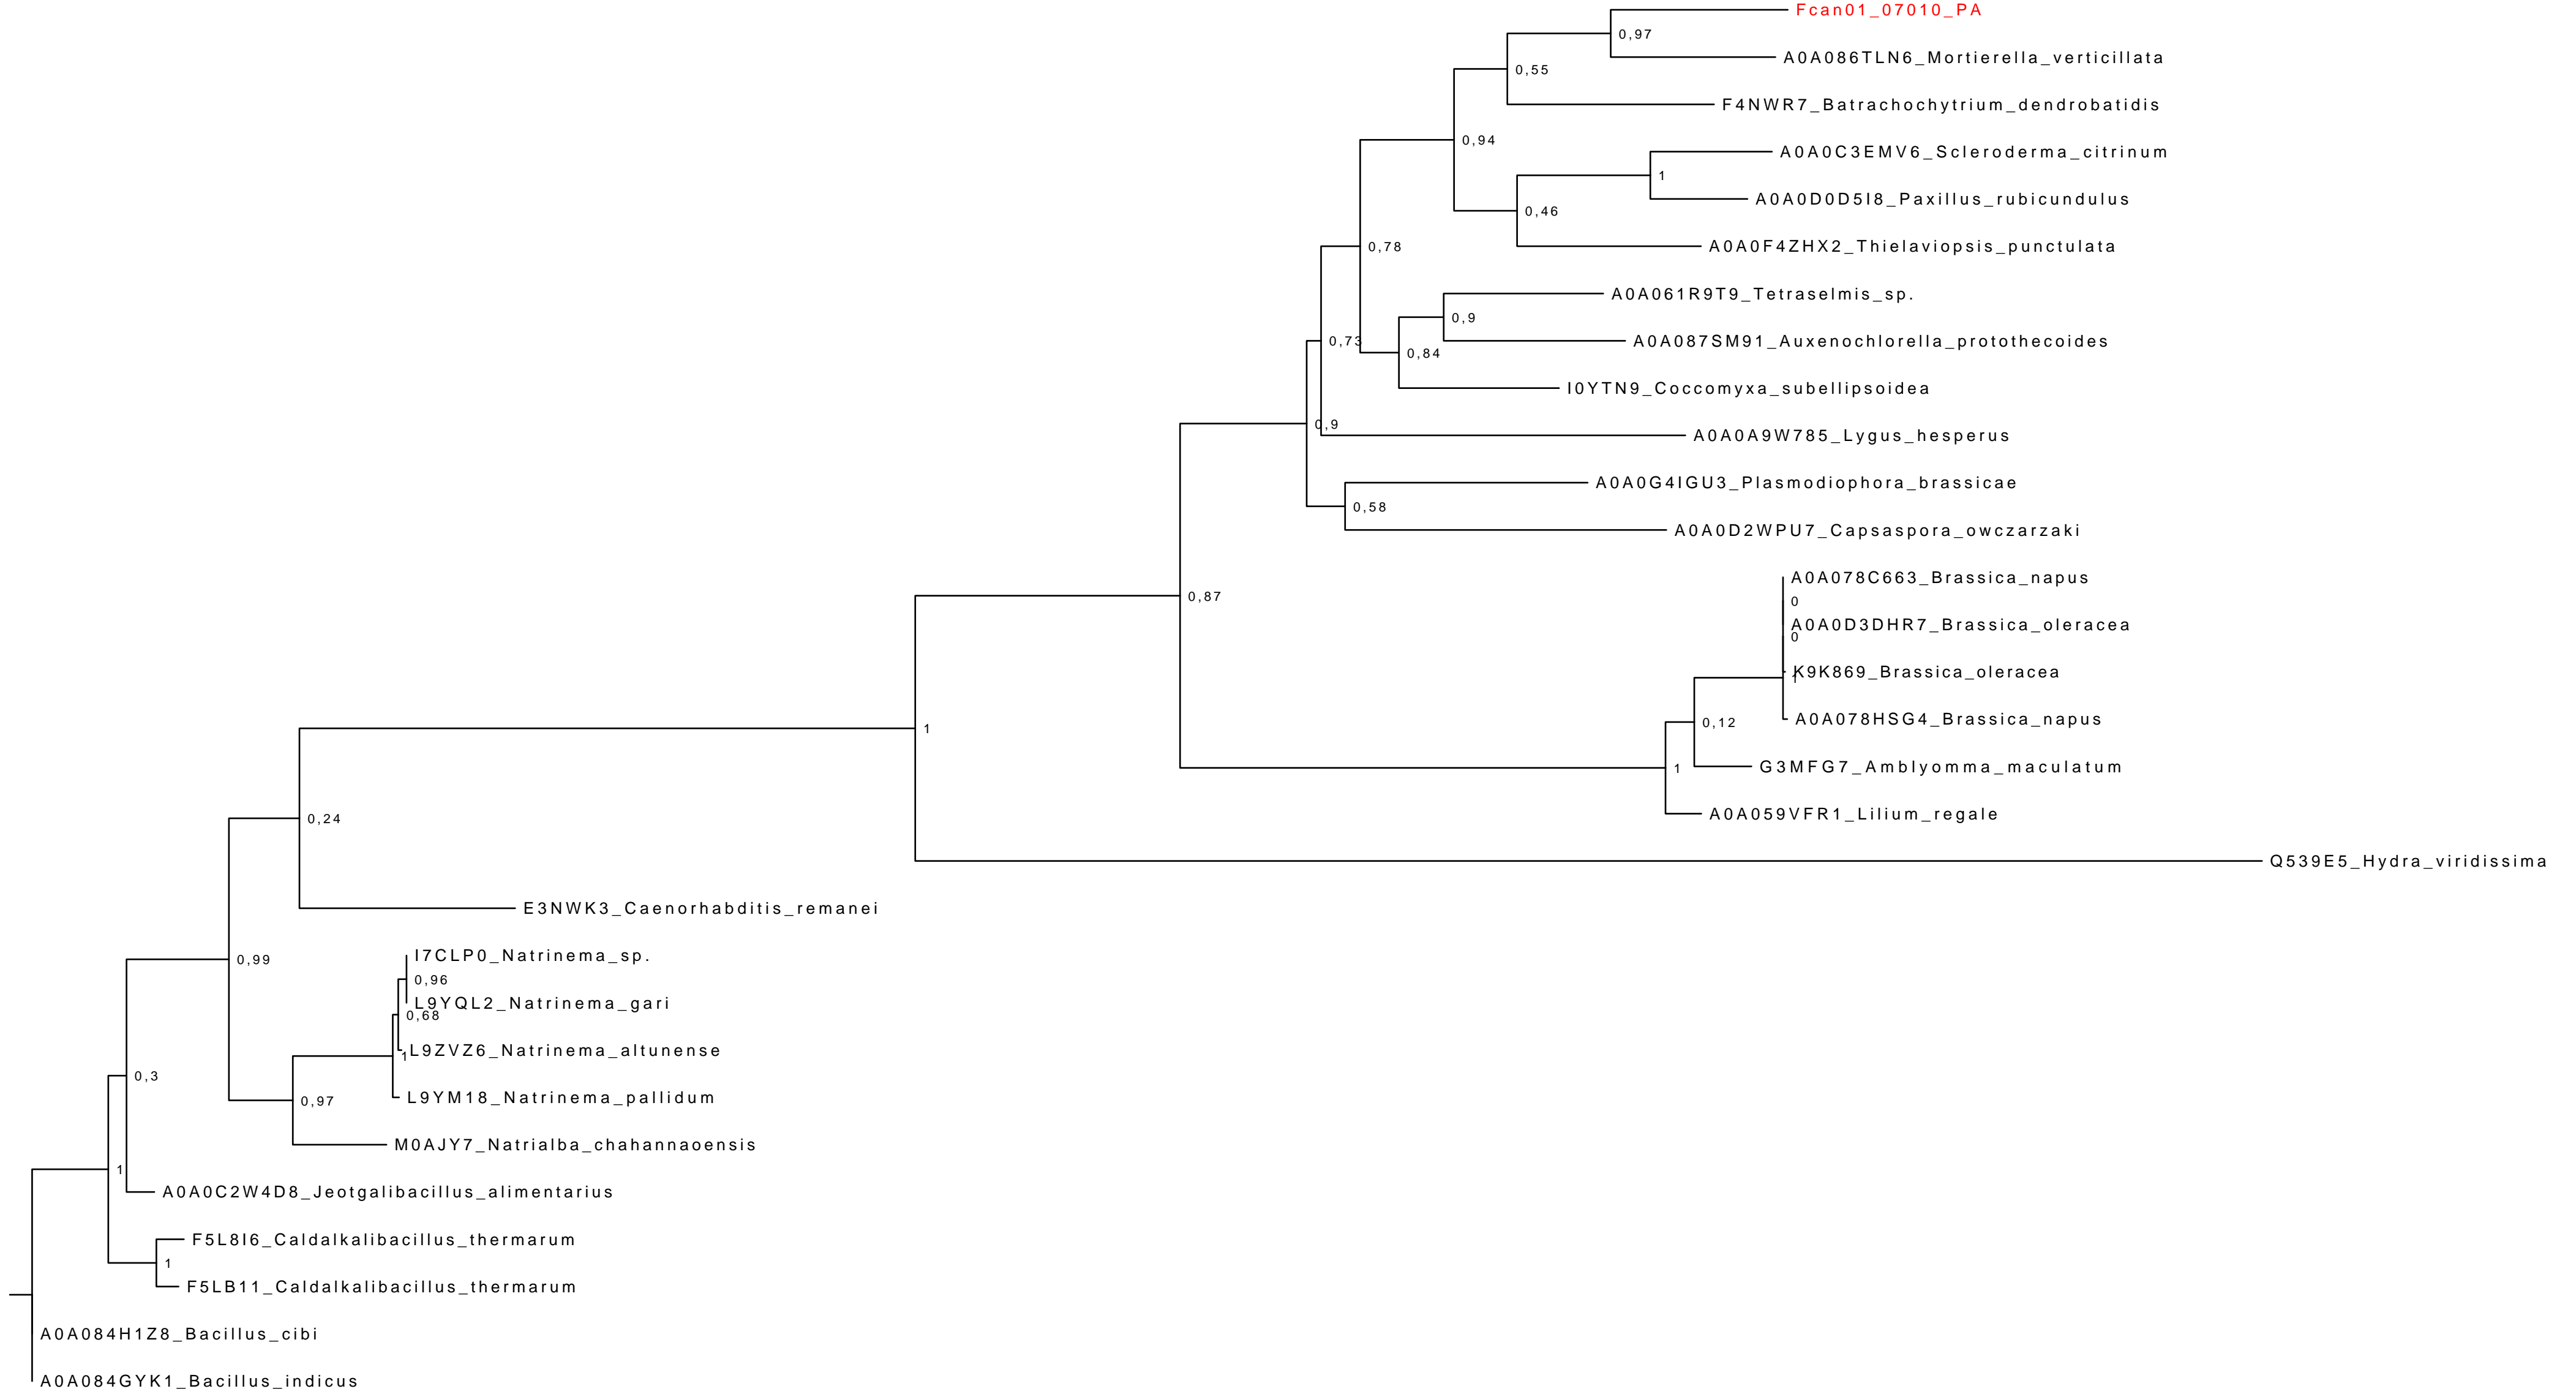

0.5

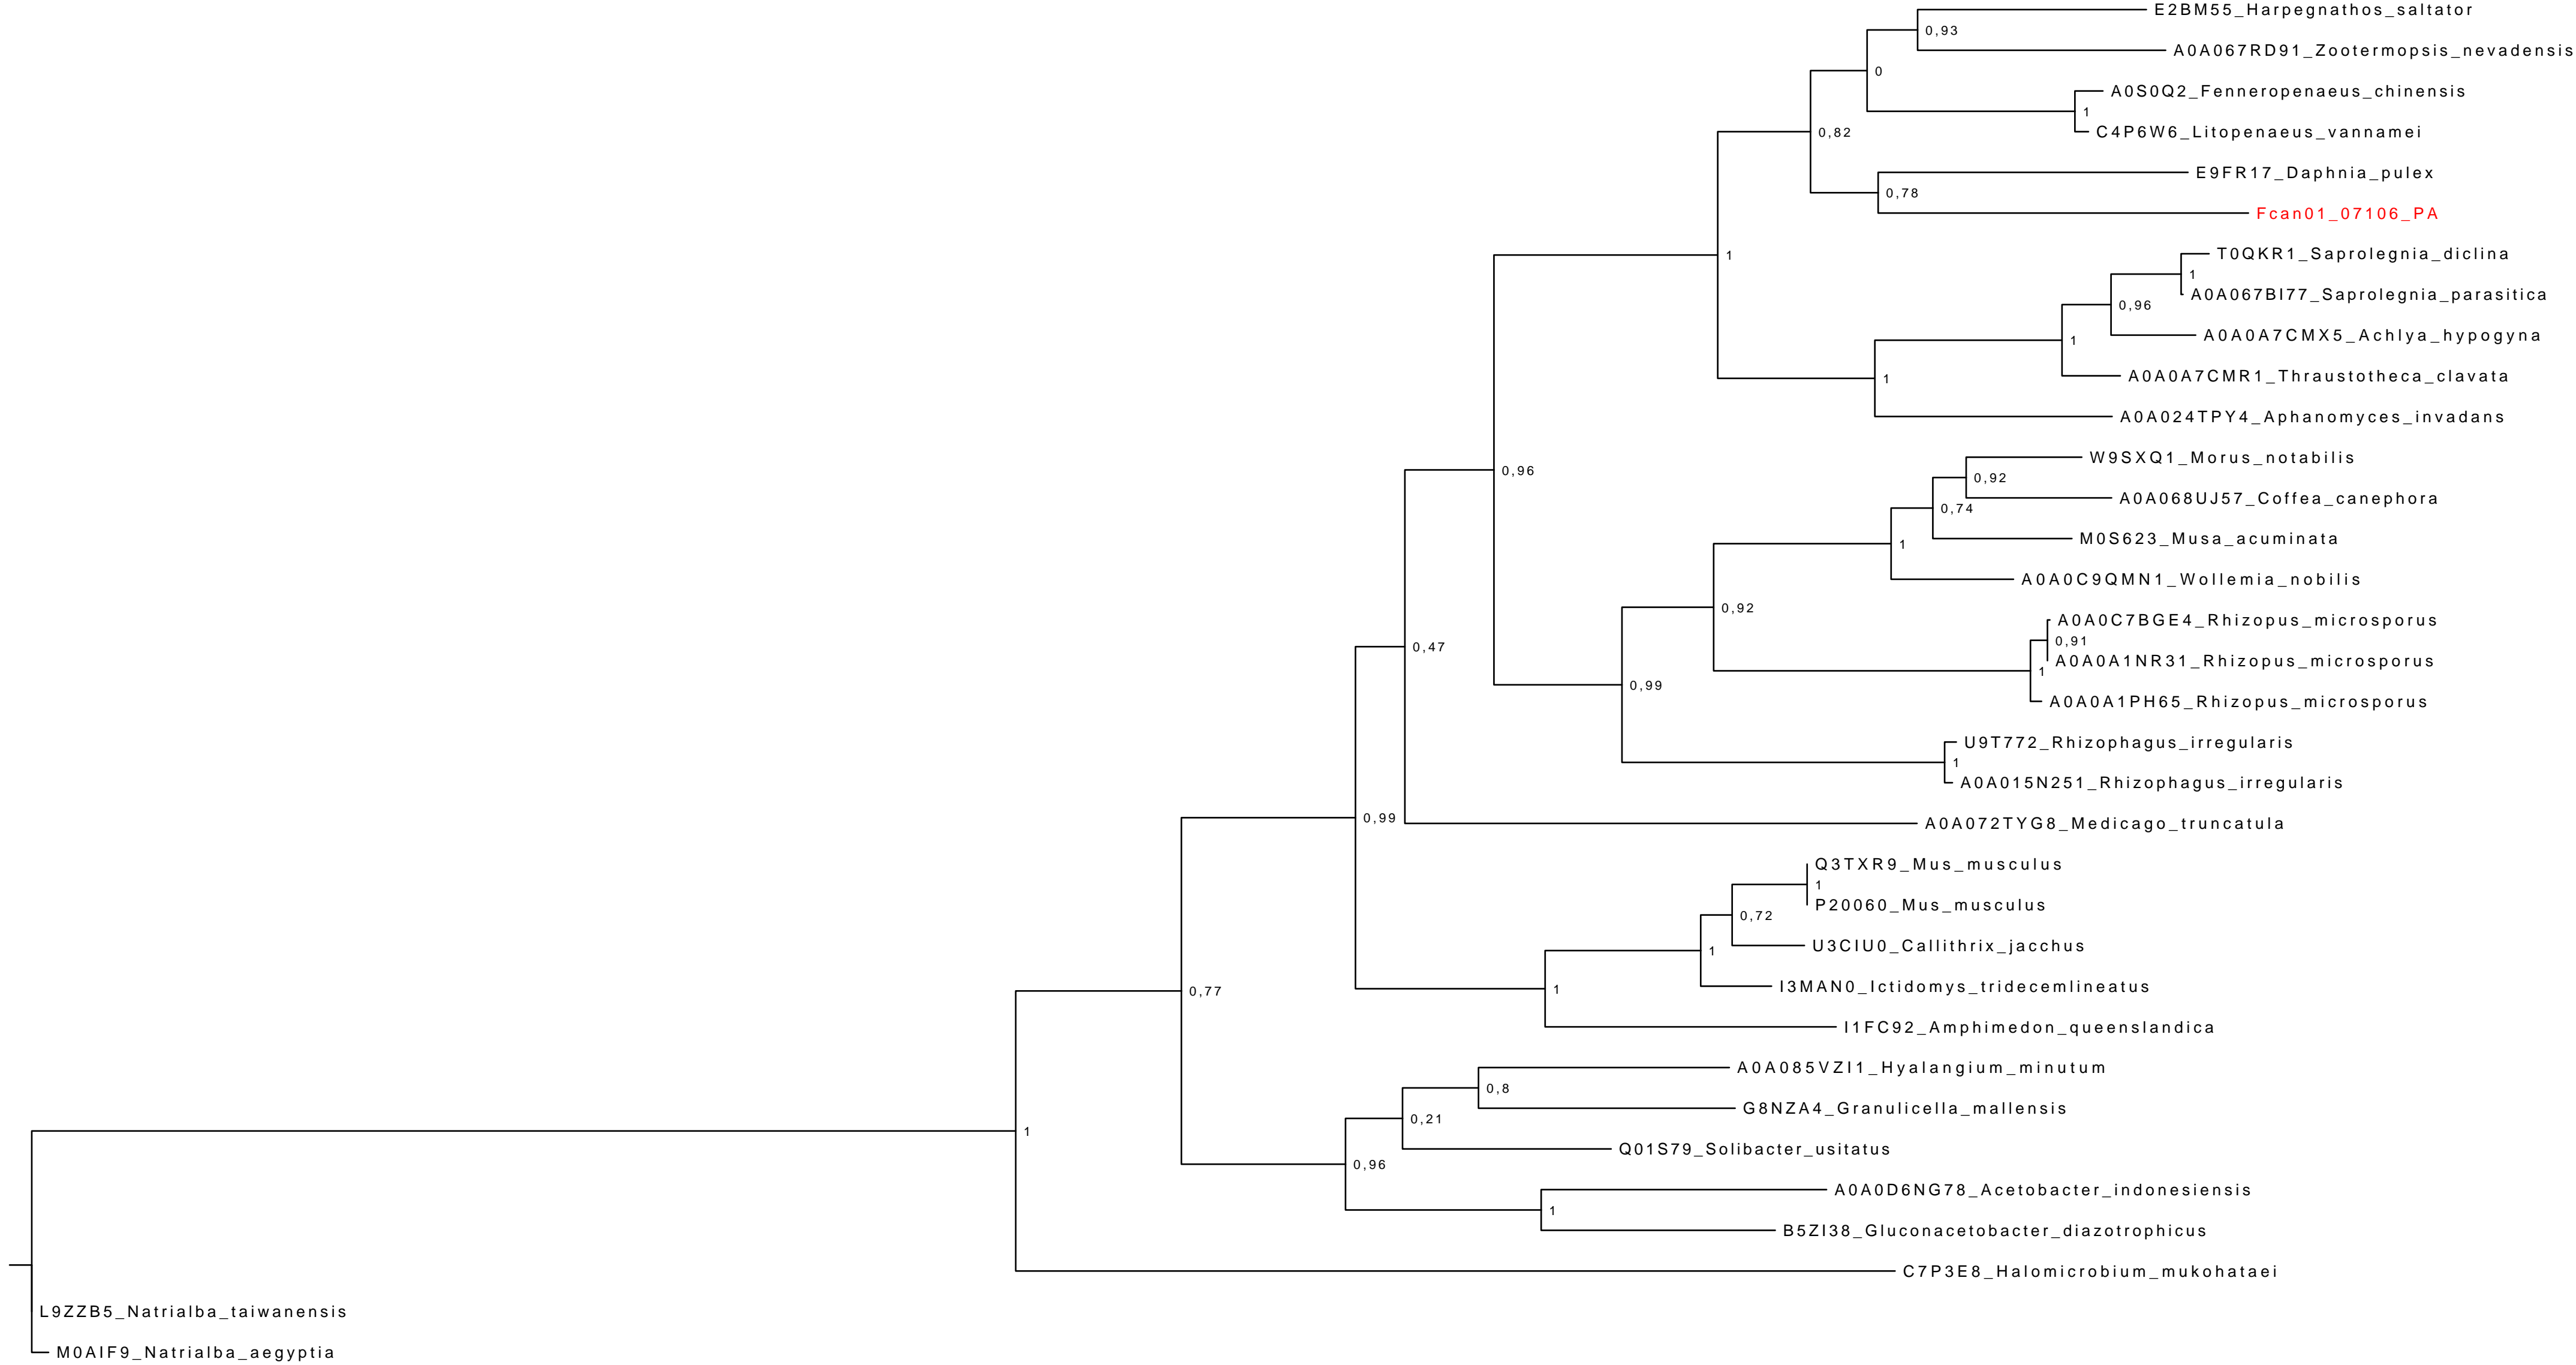

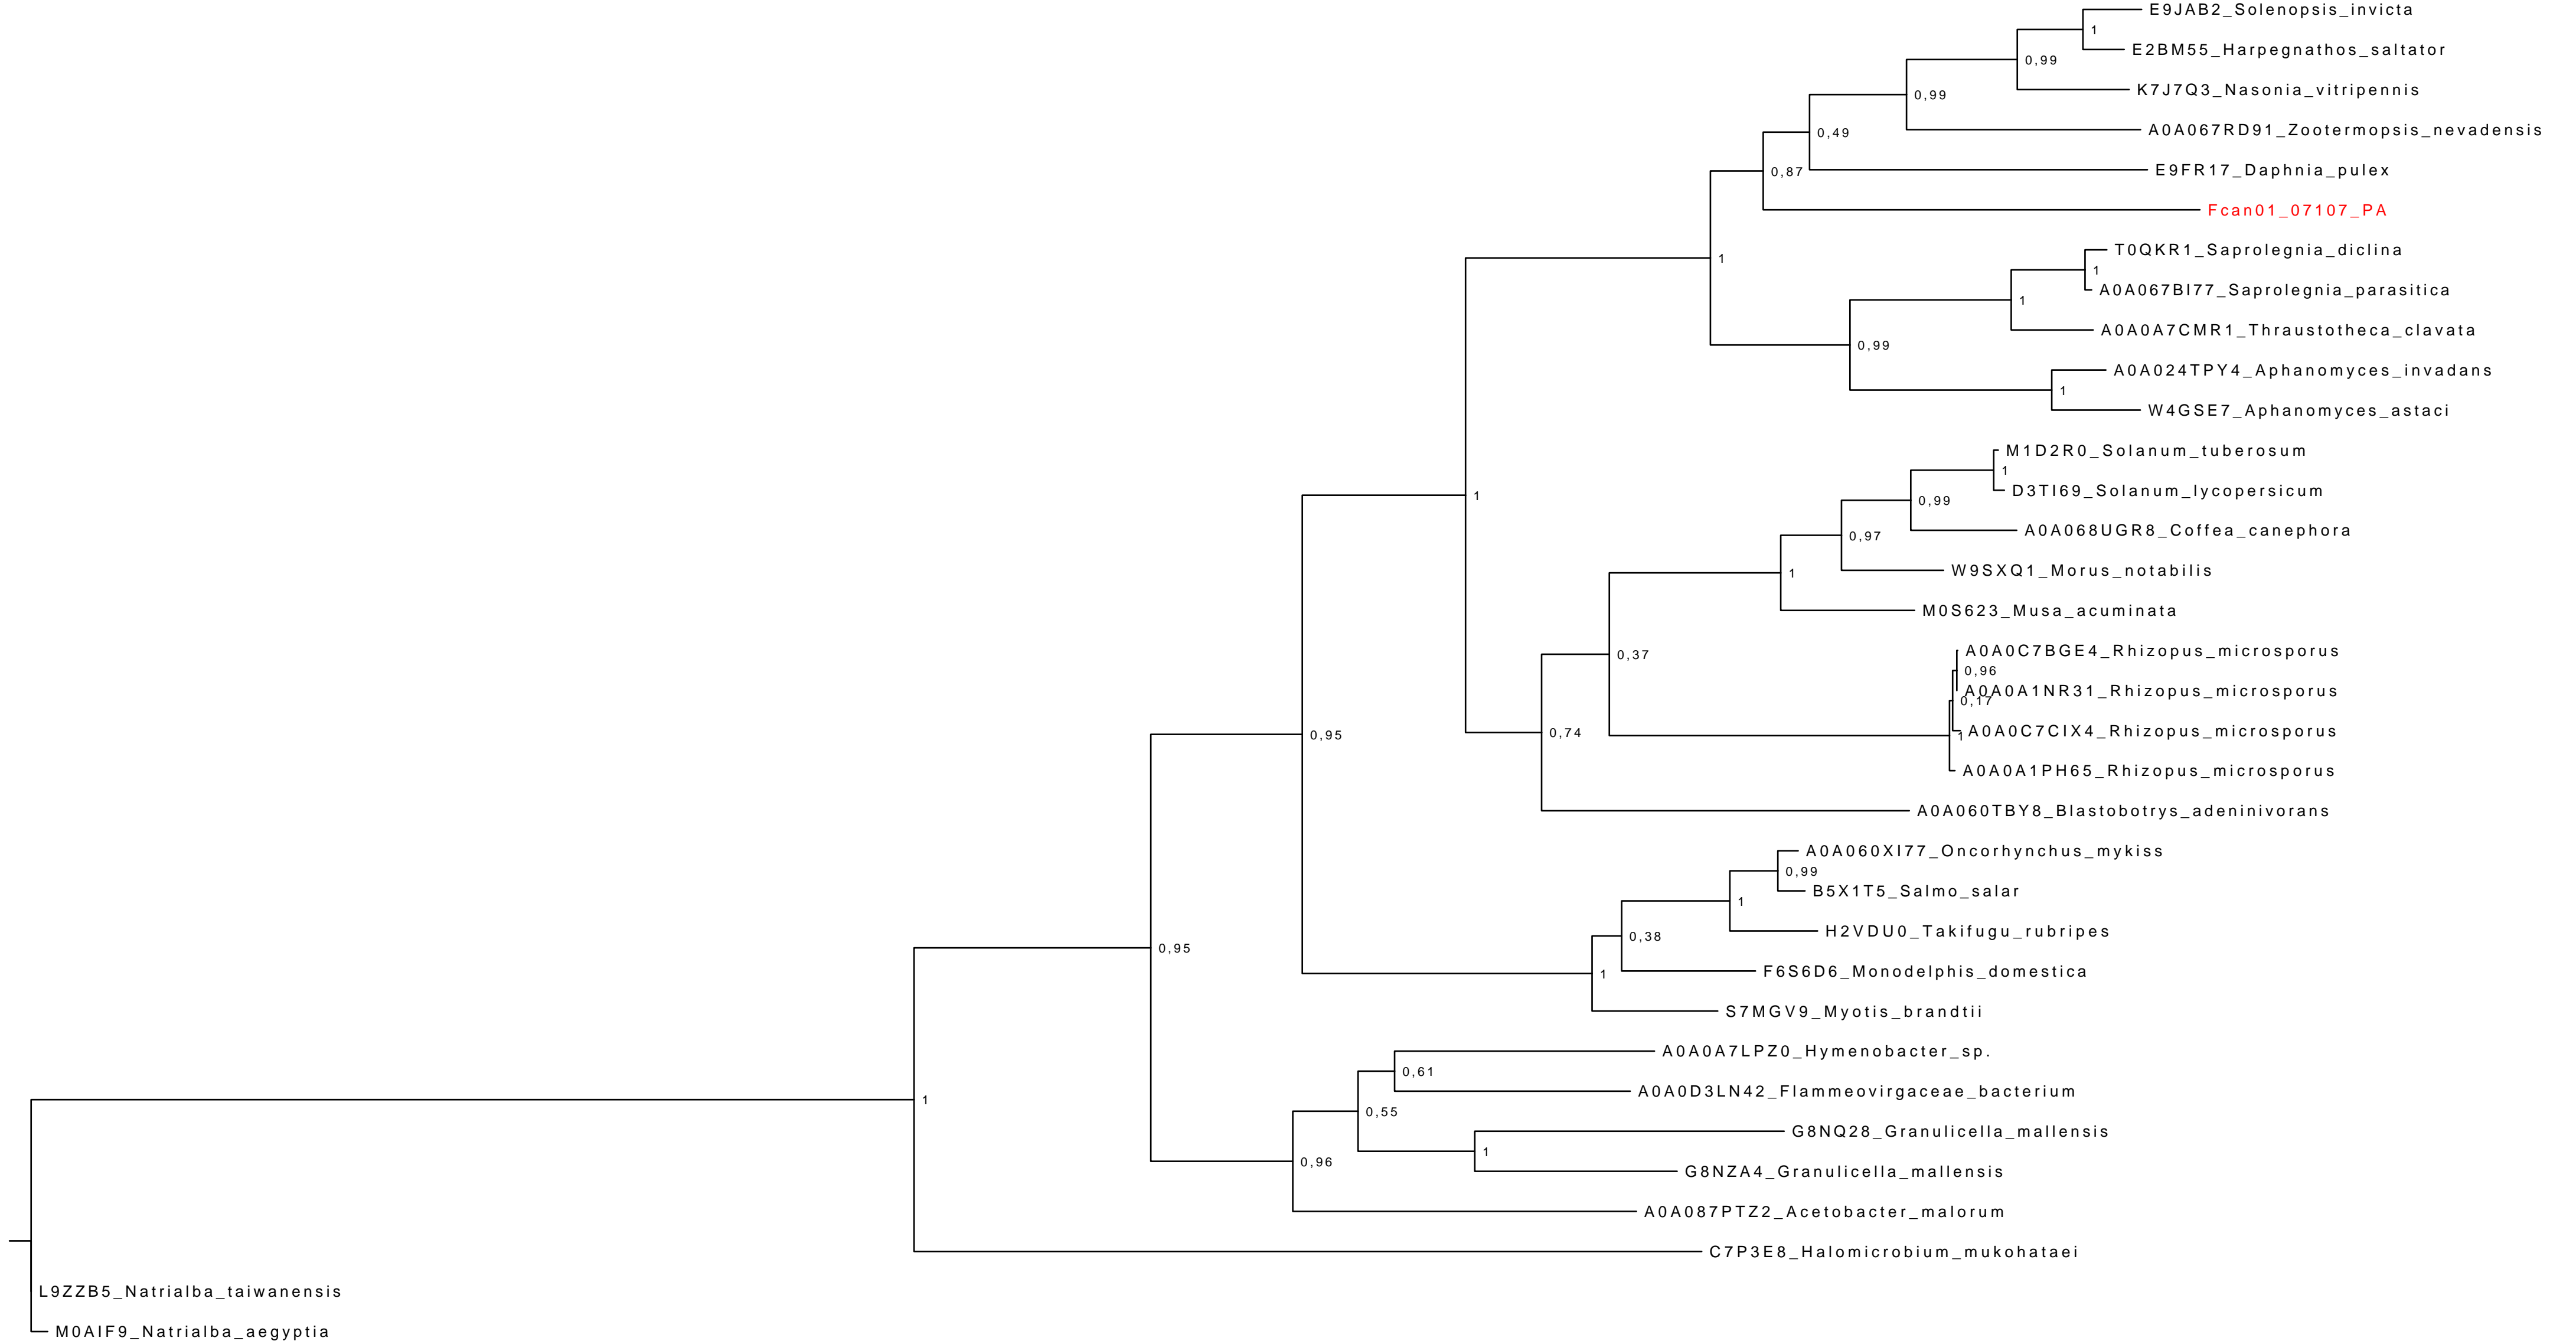

0.5

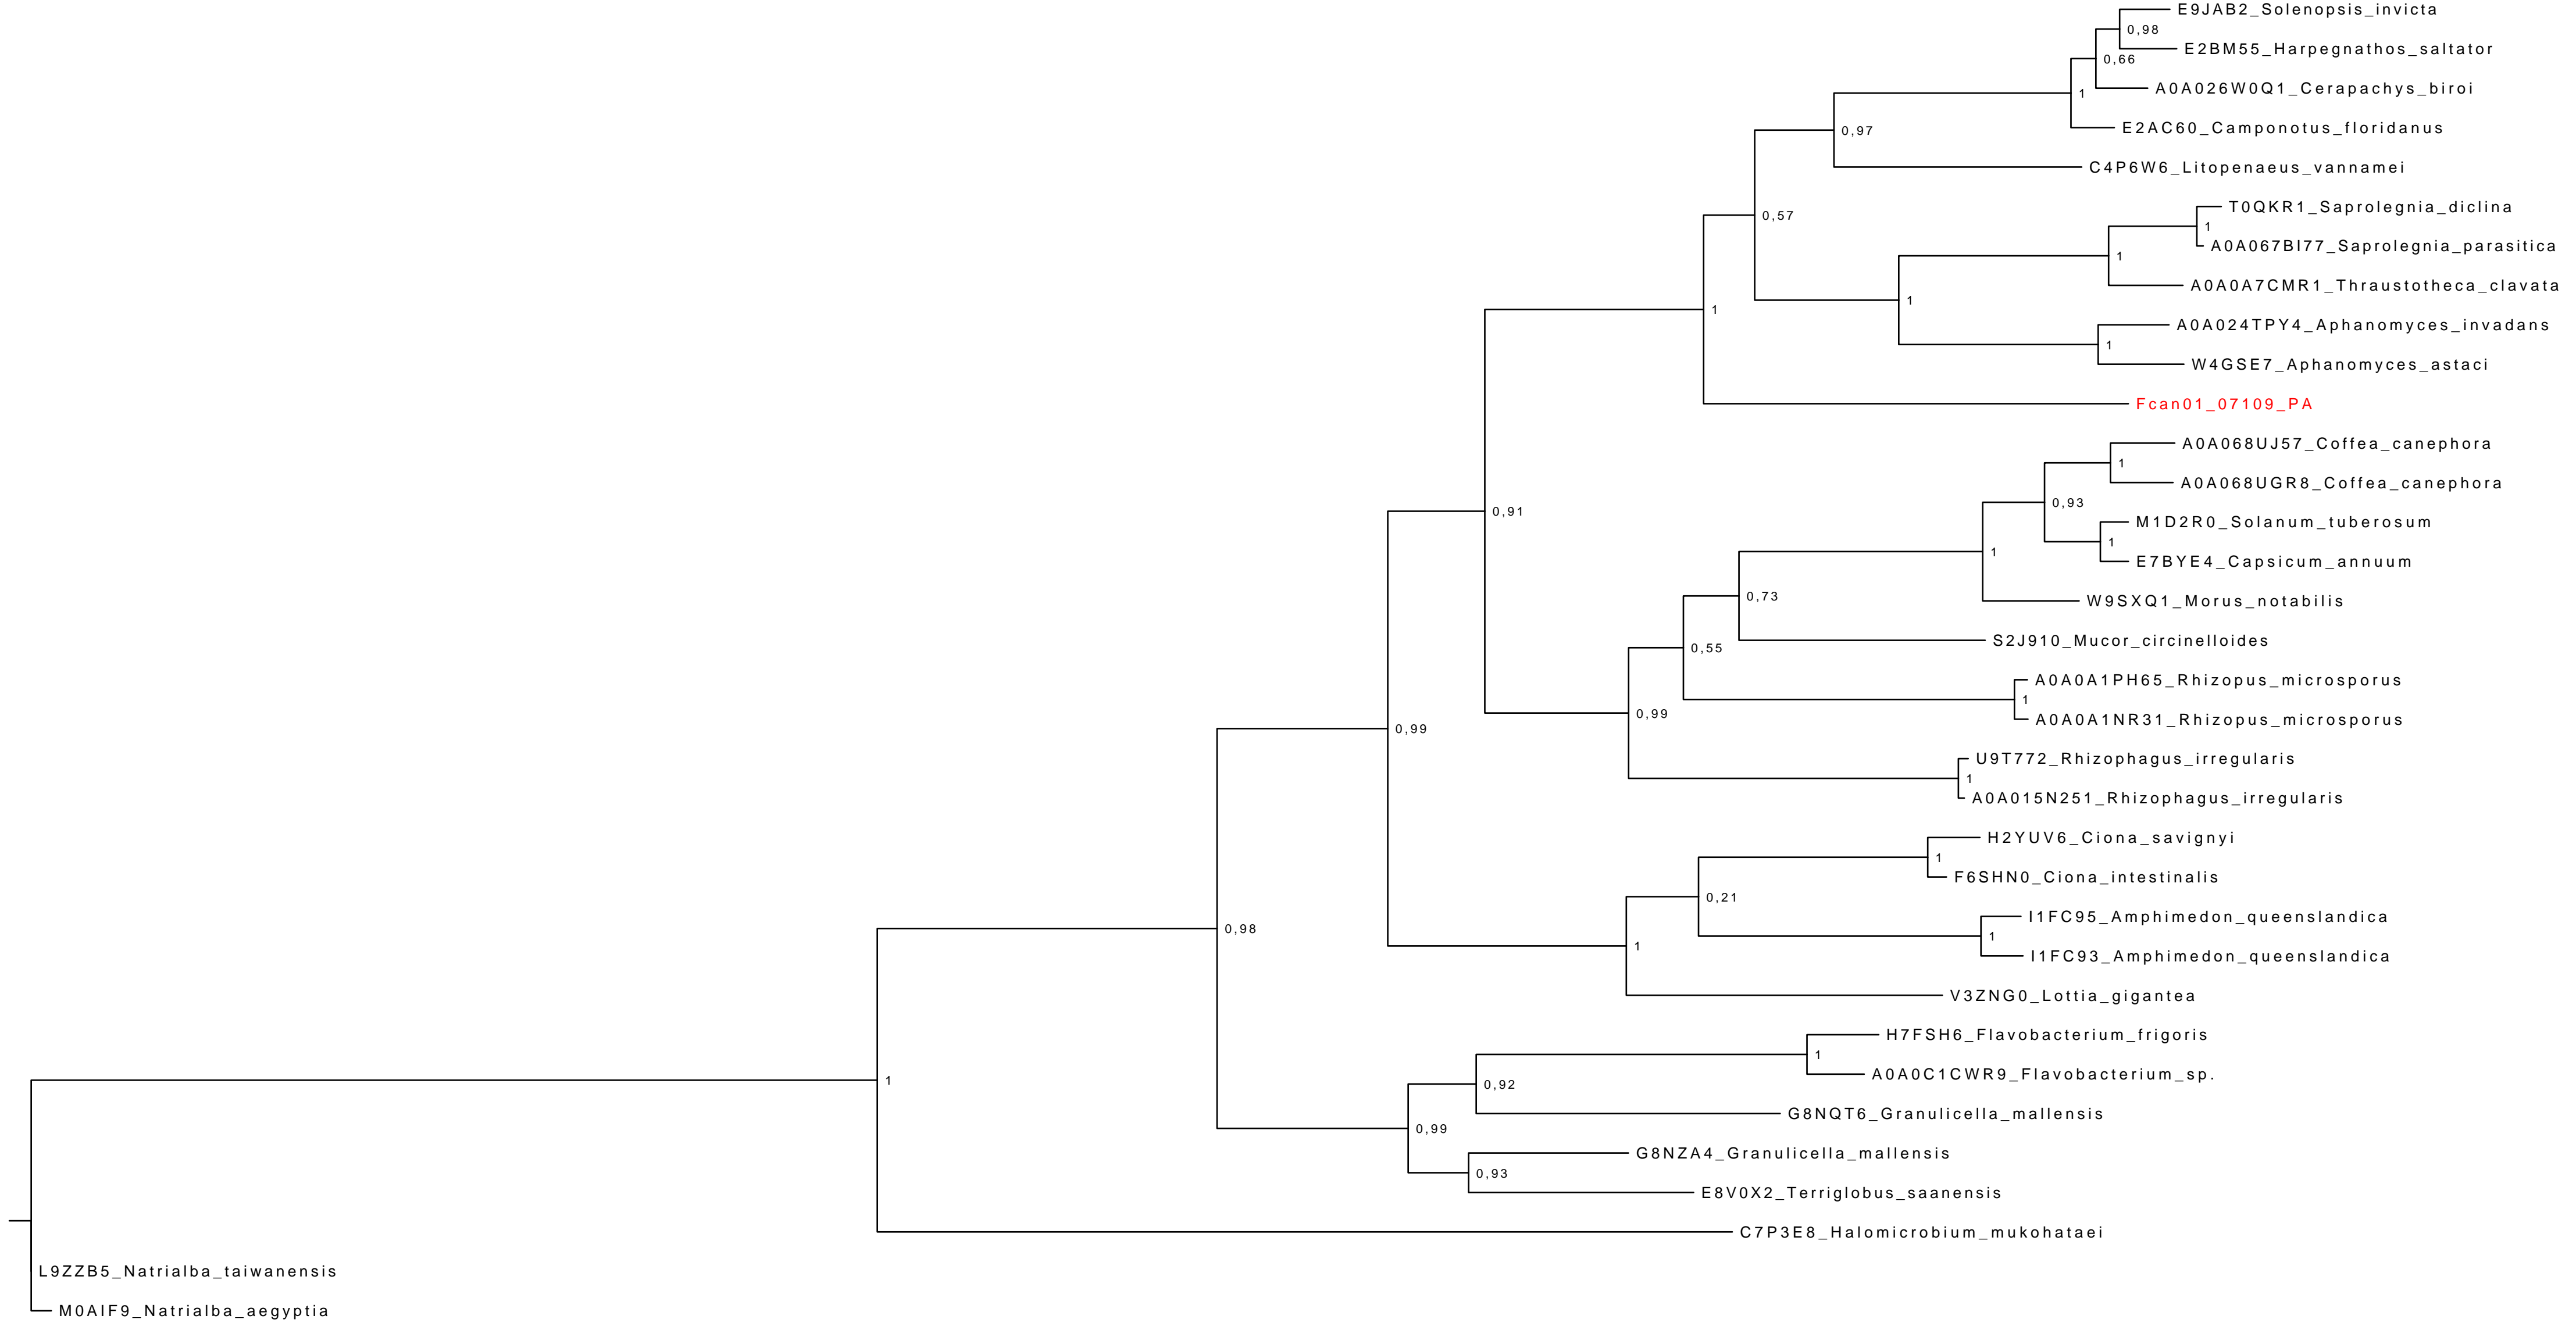

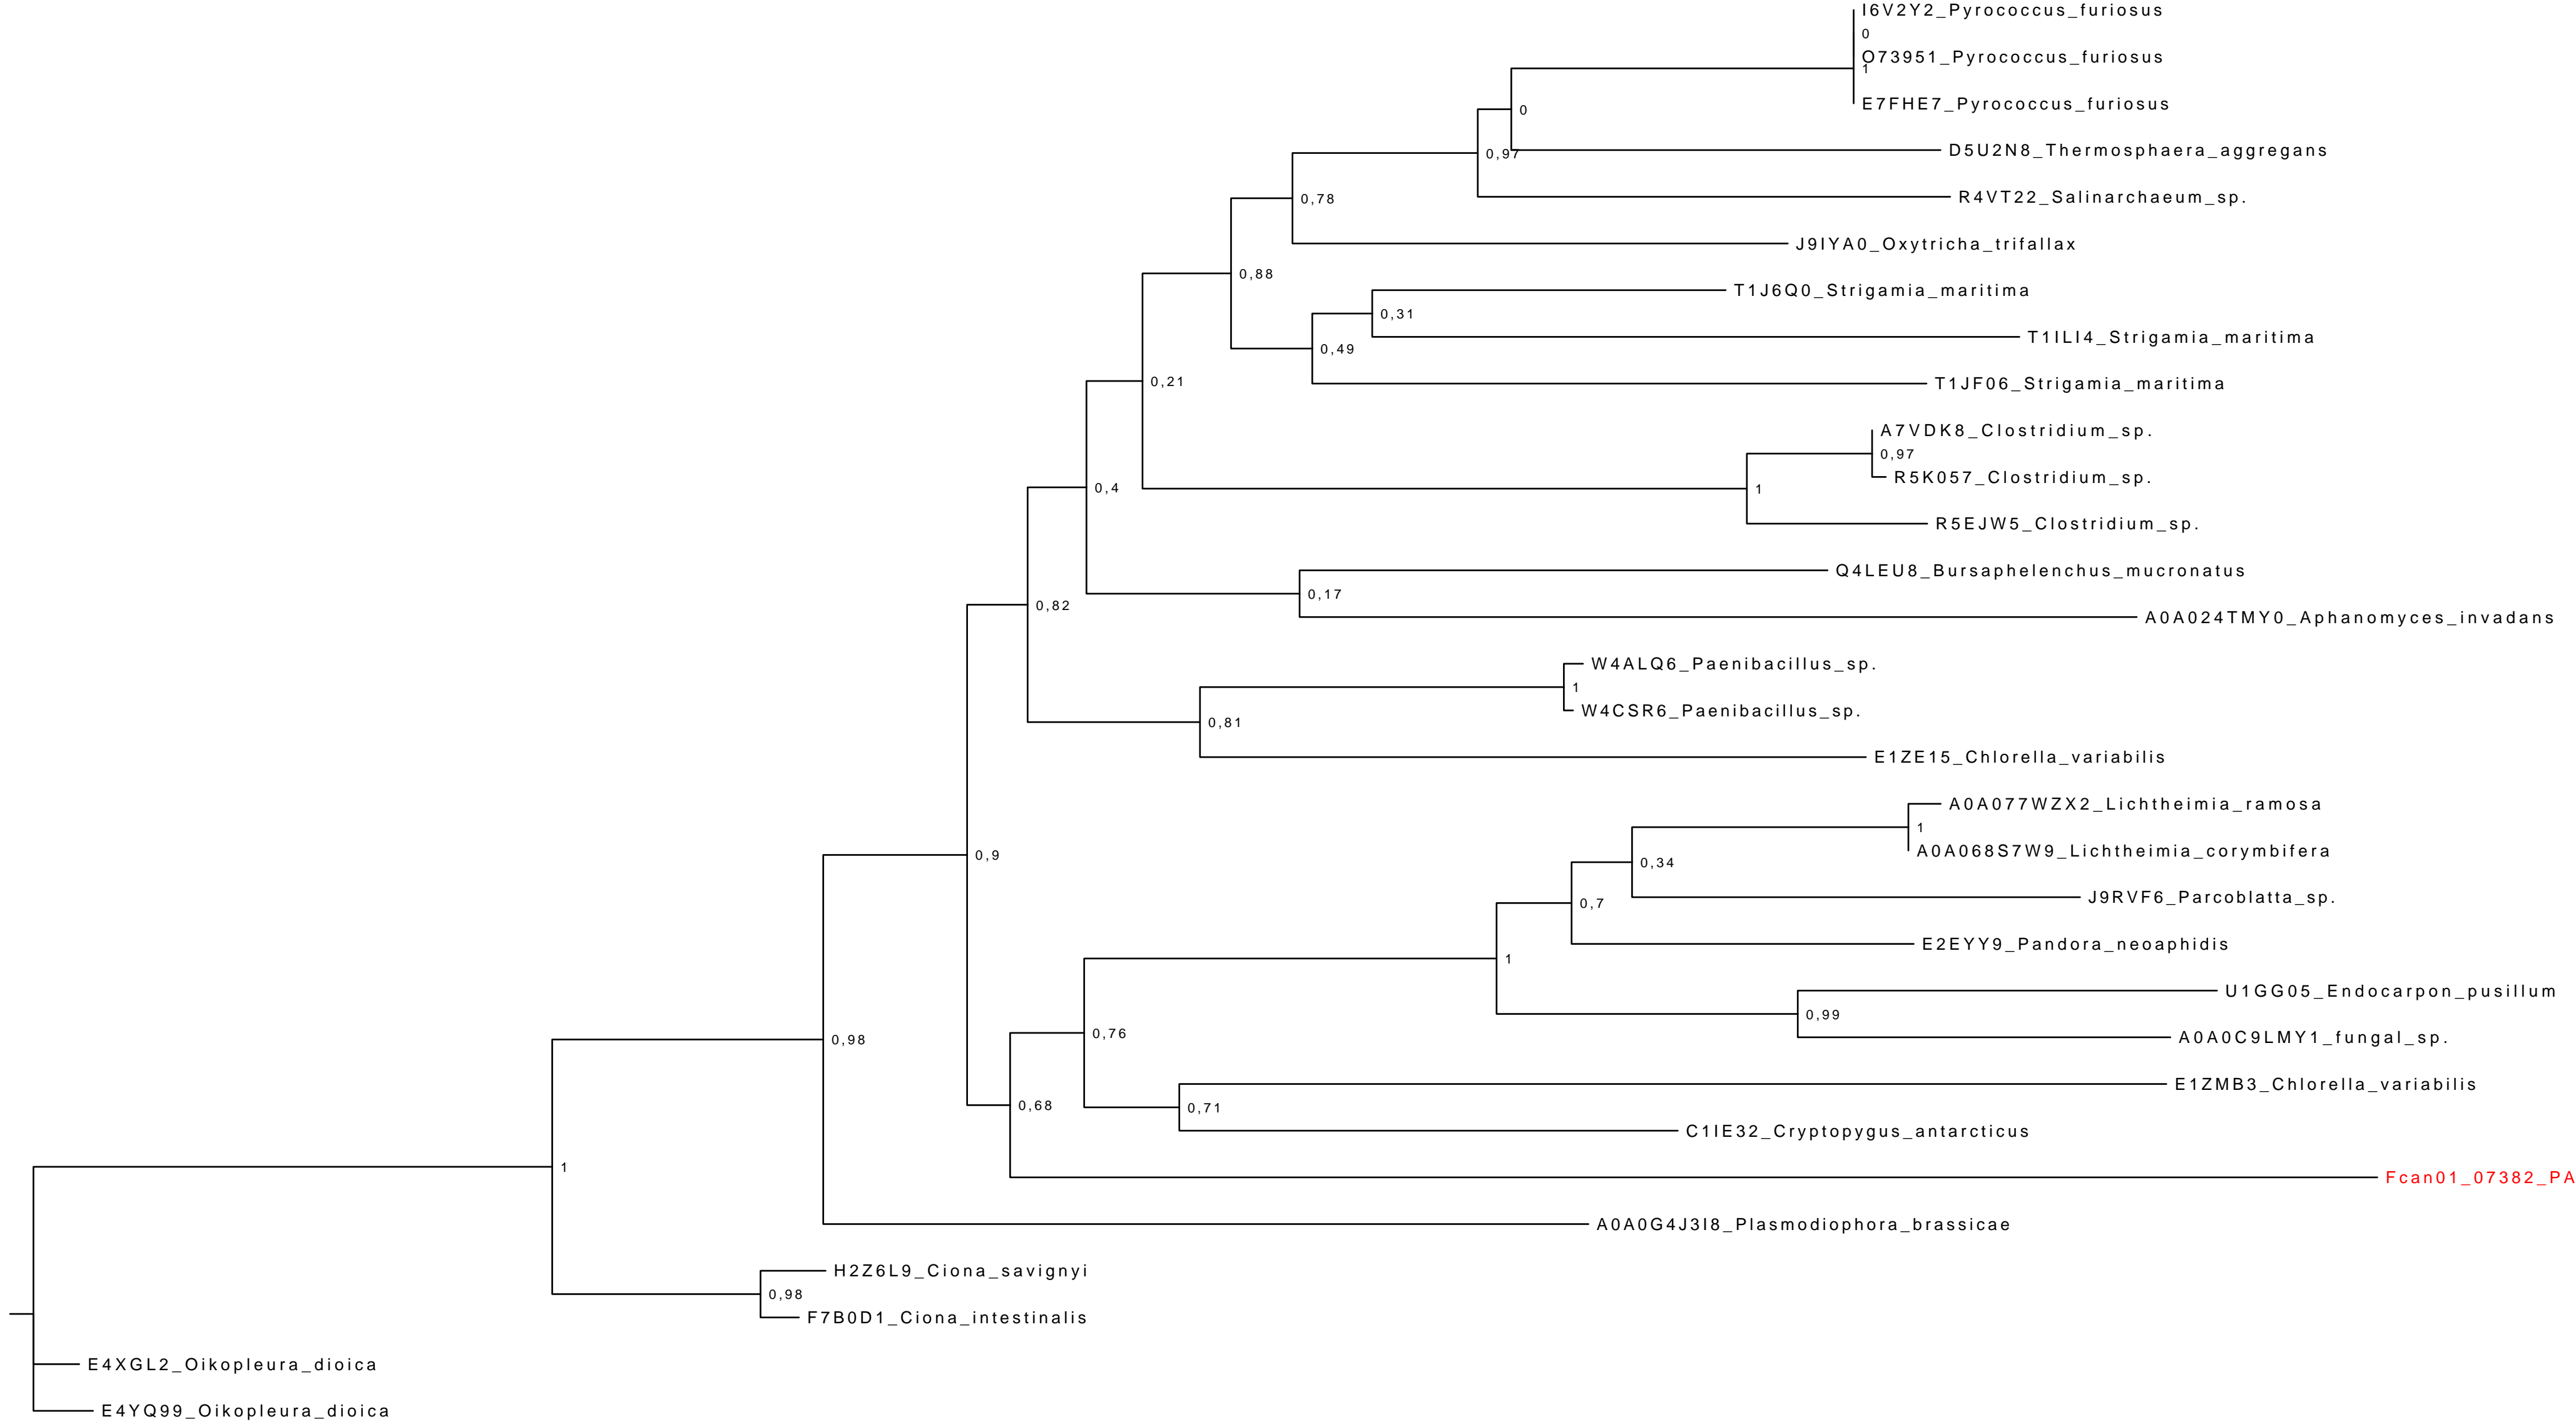

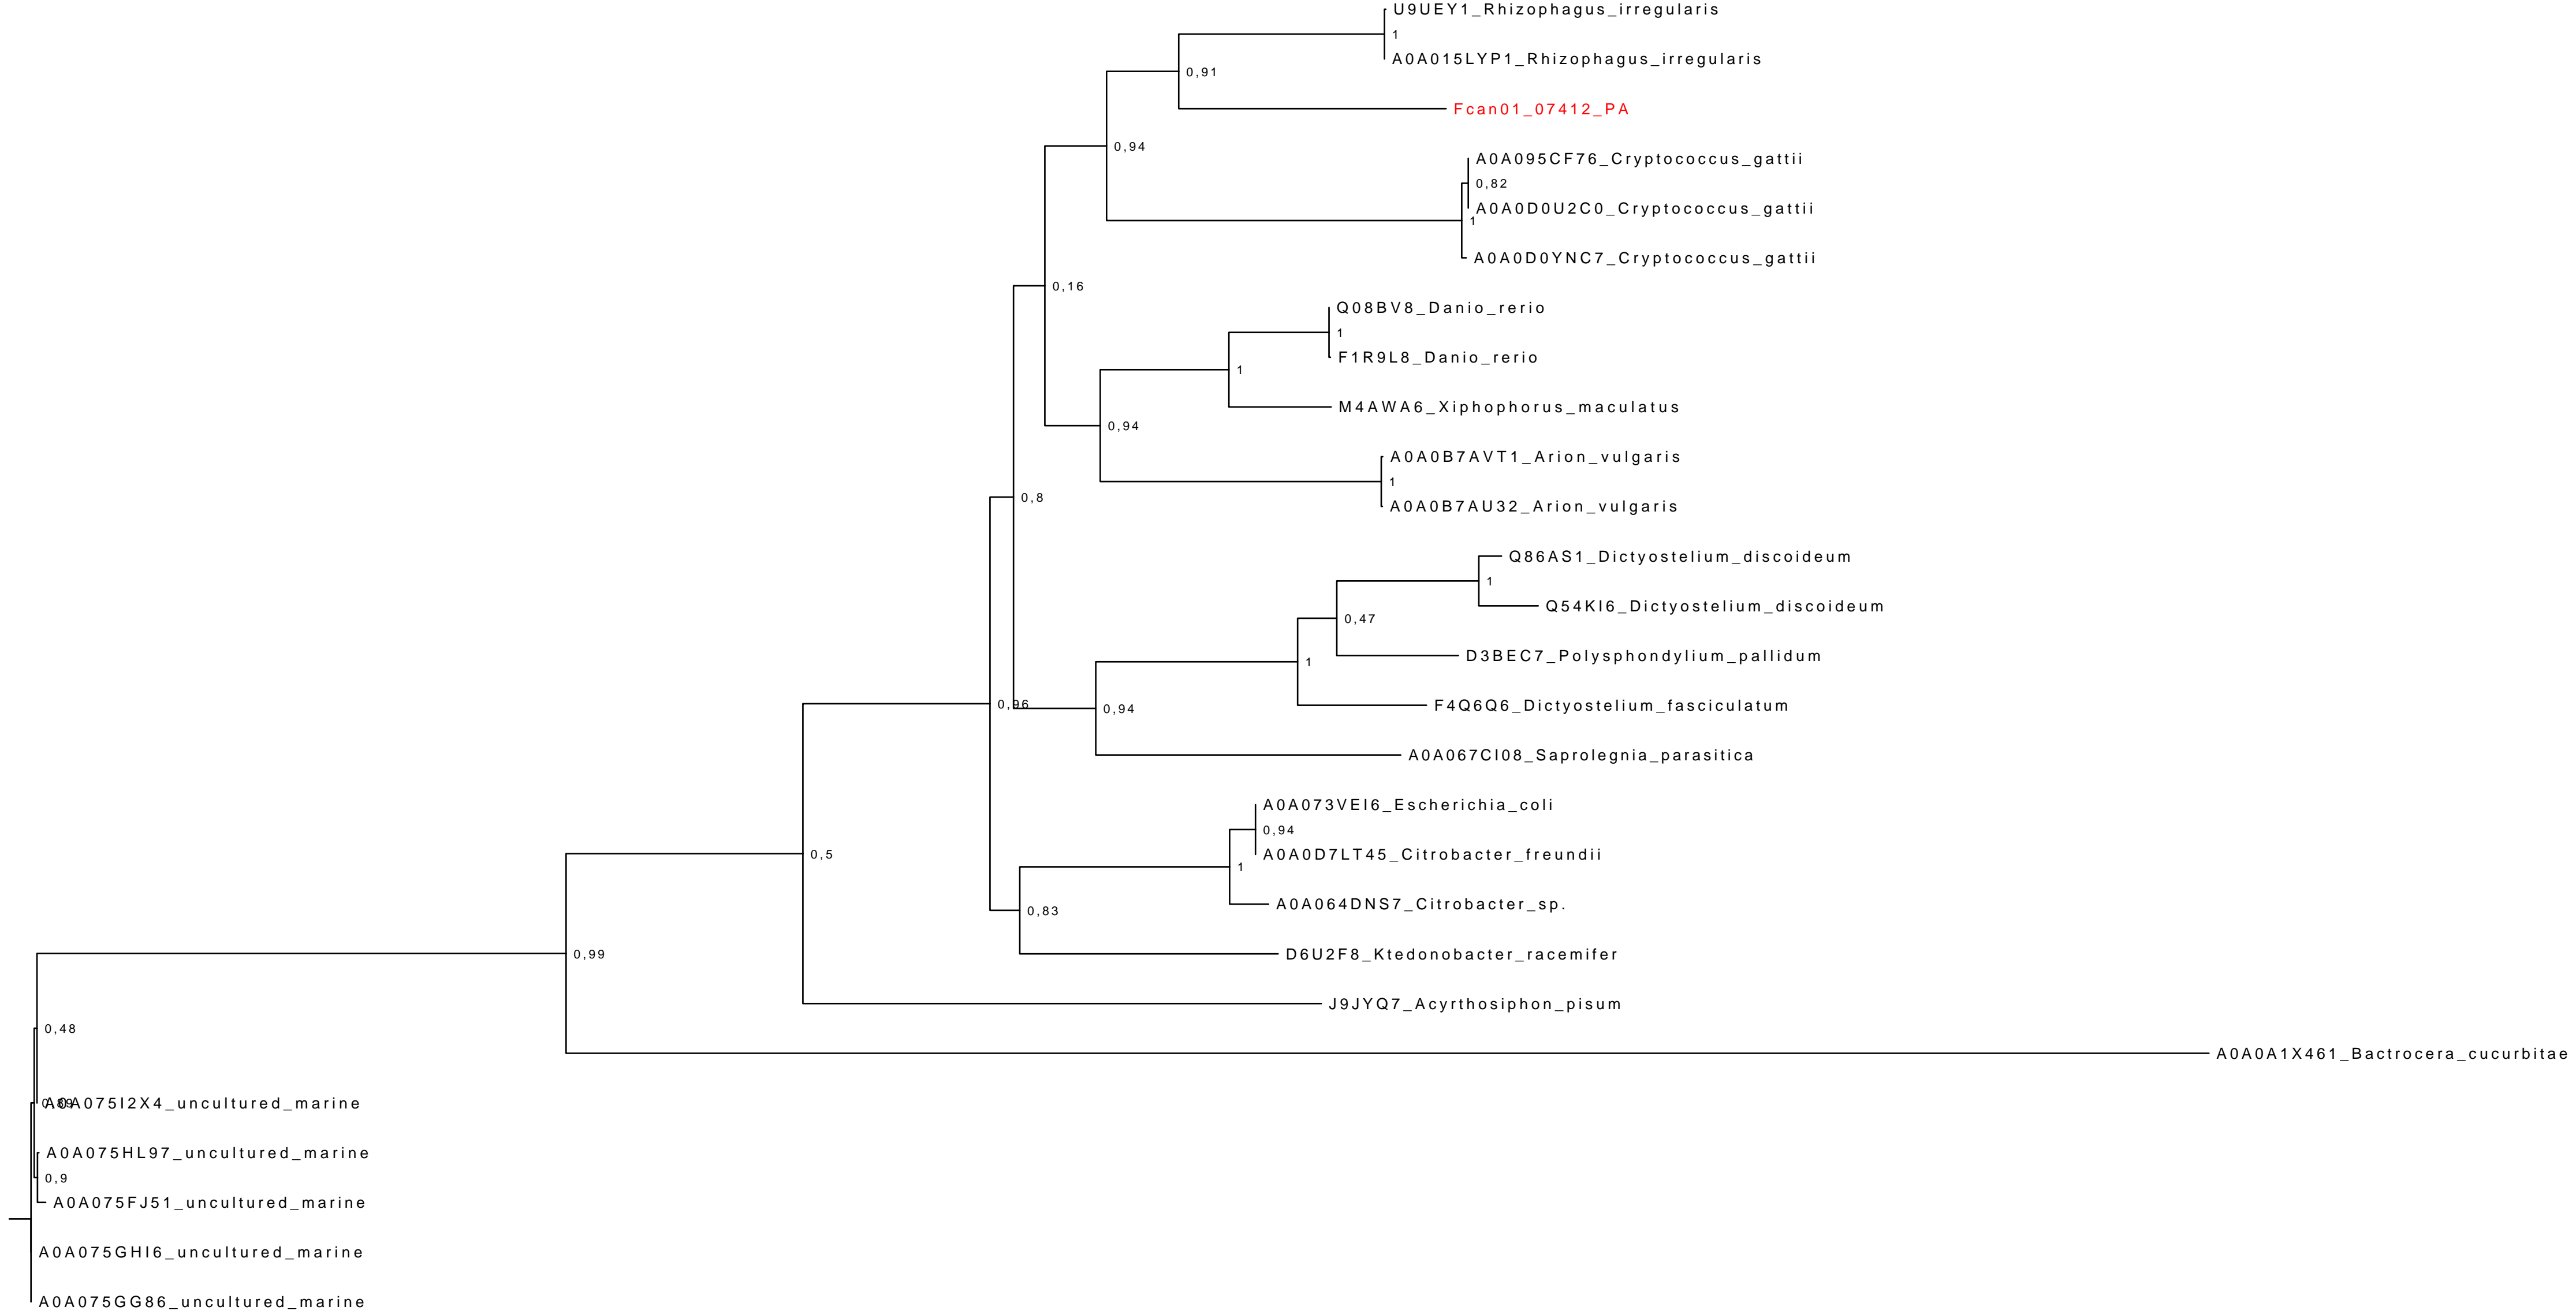

0.4

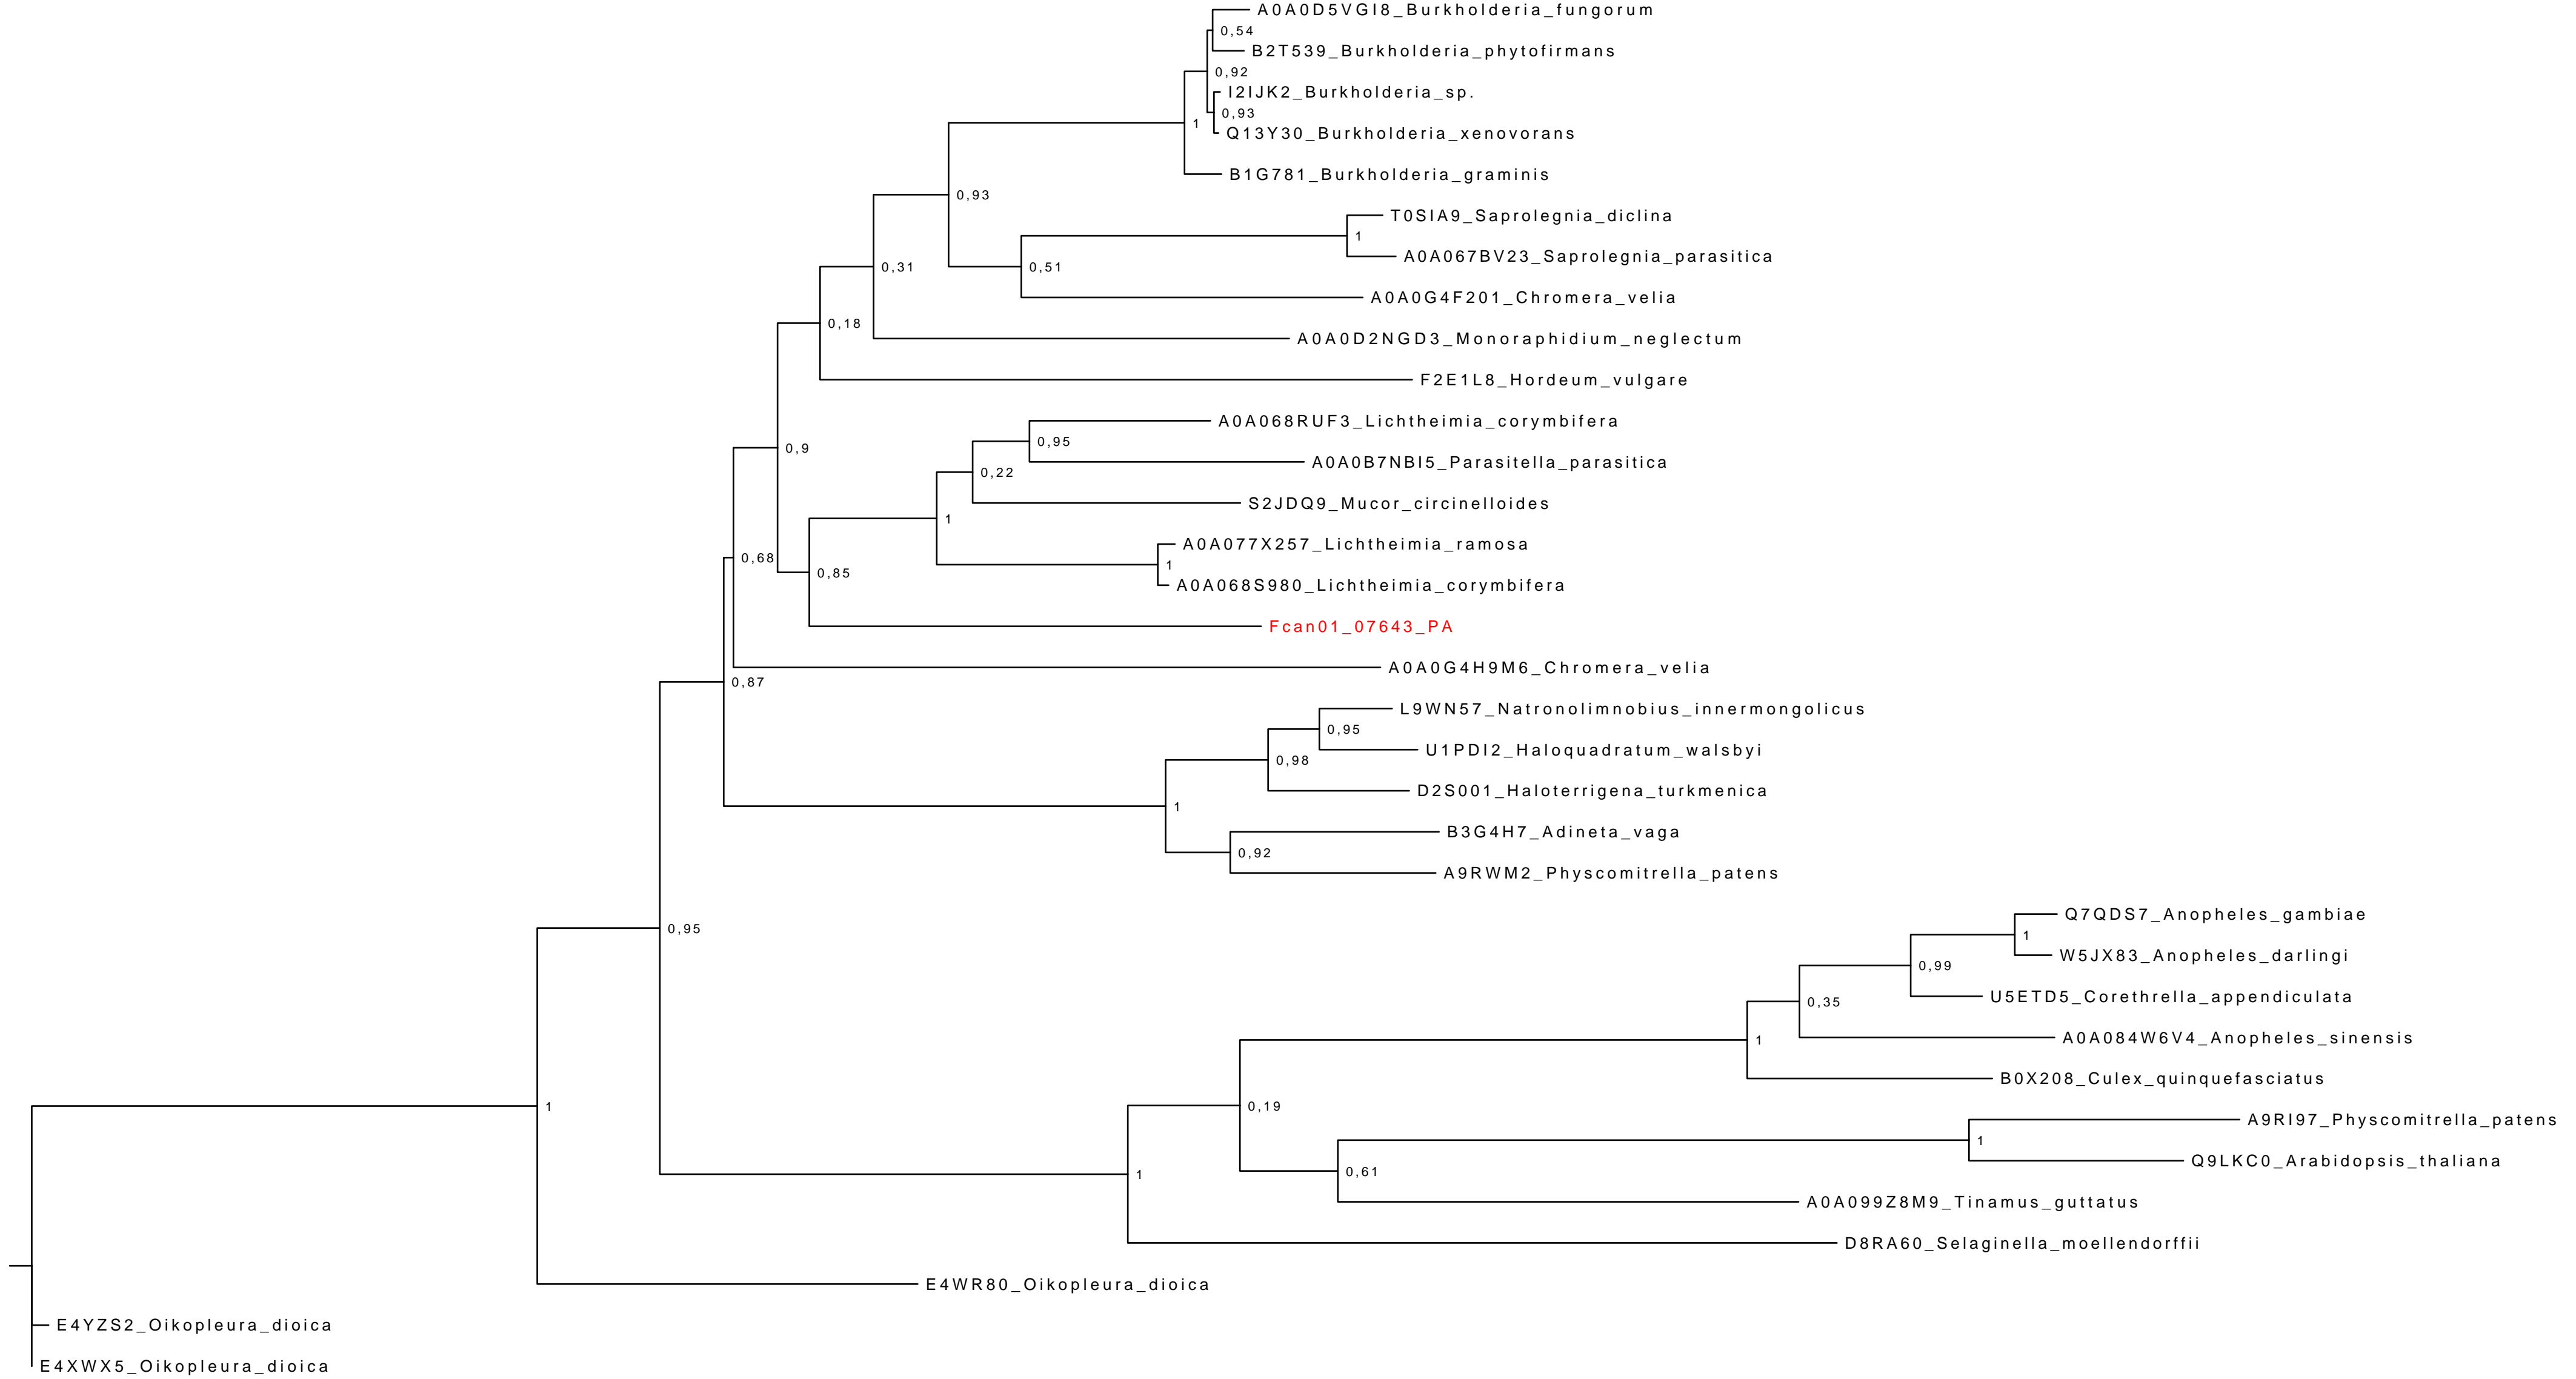

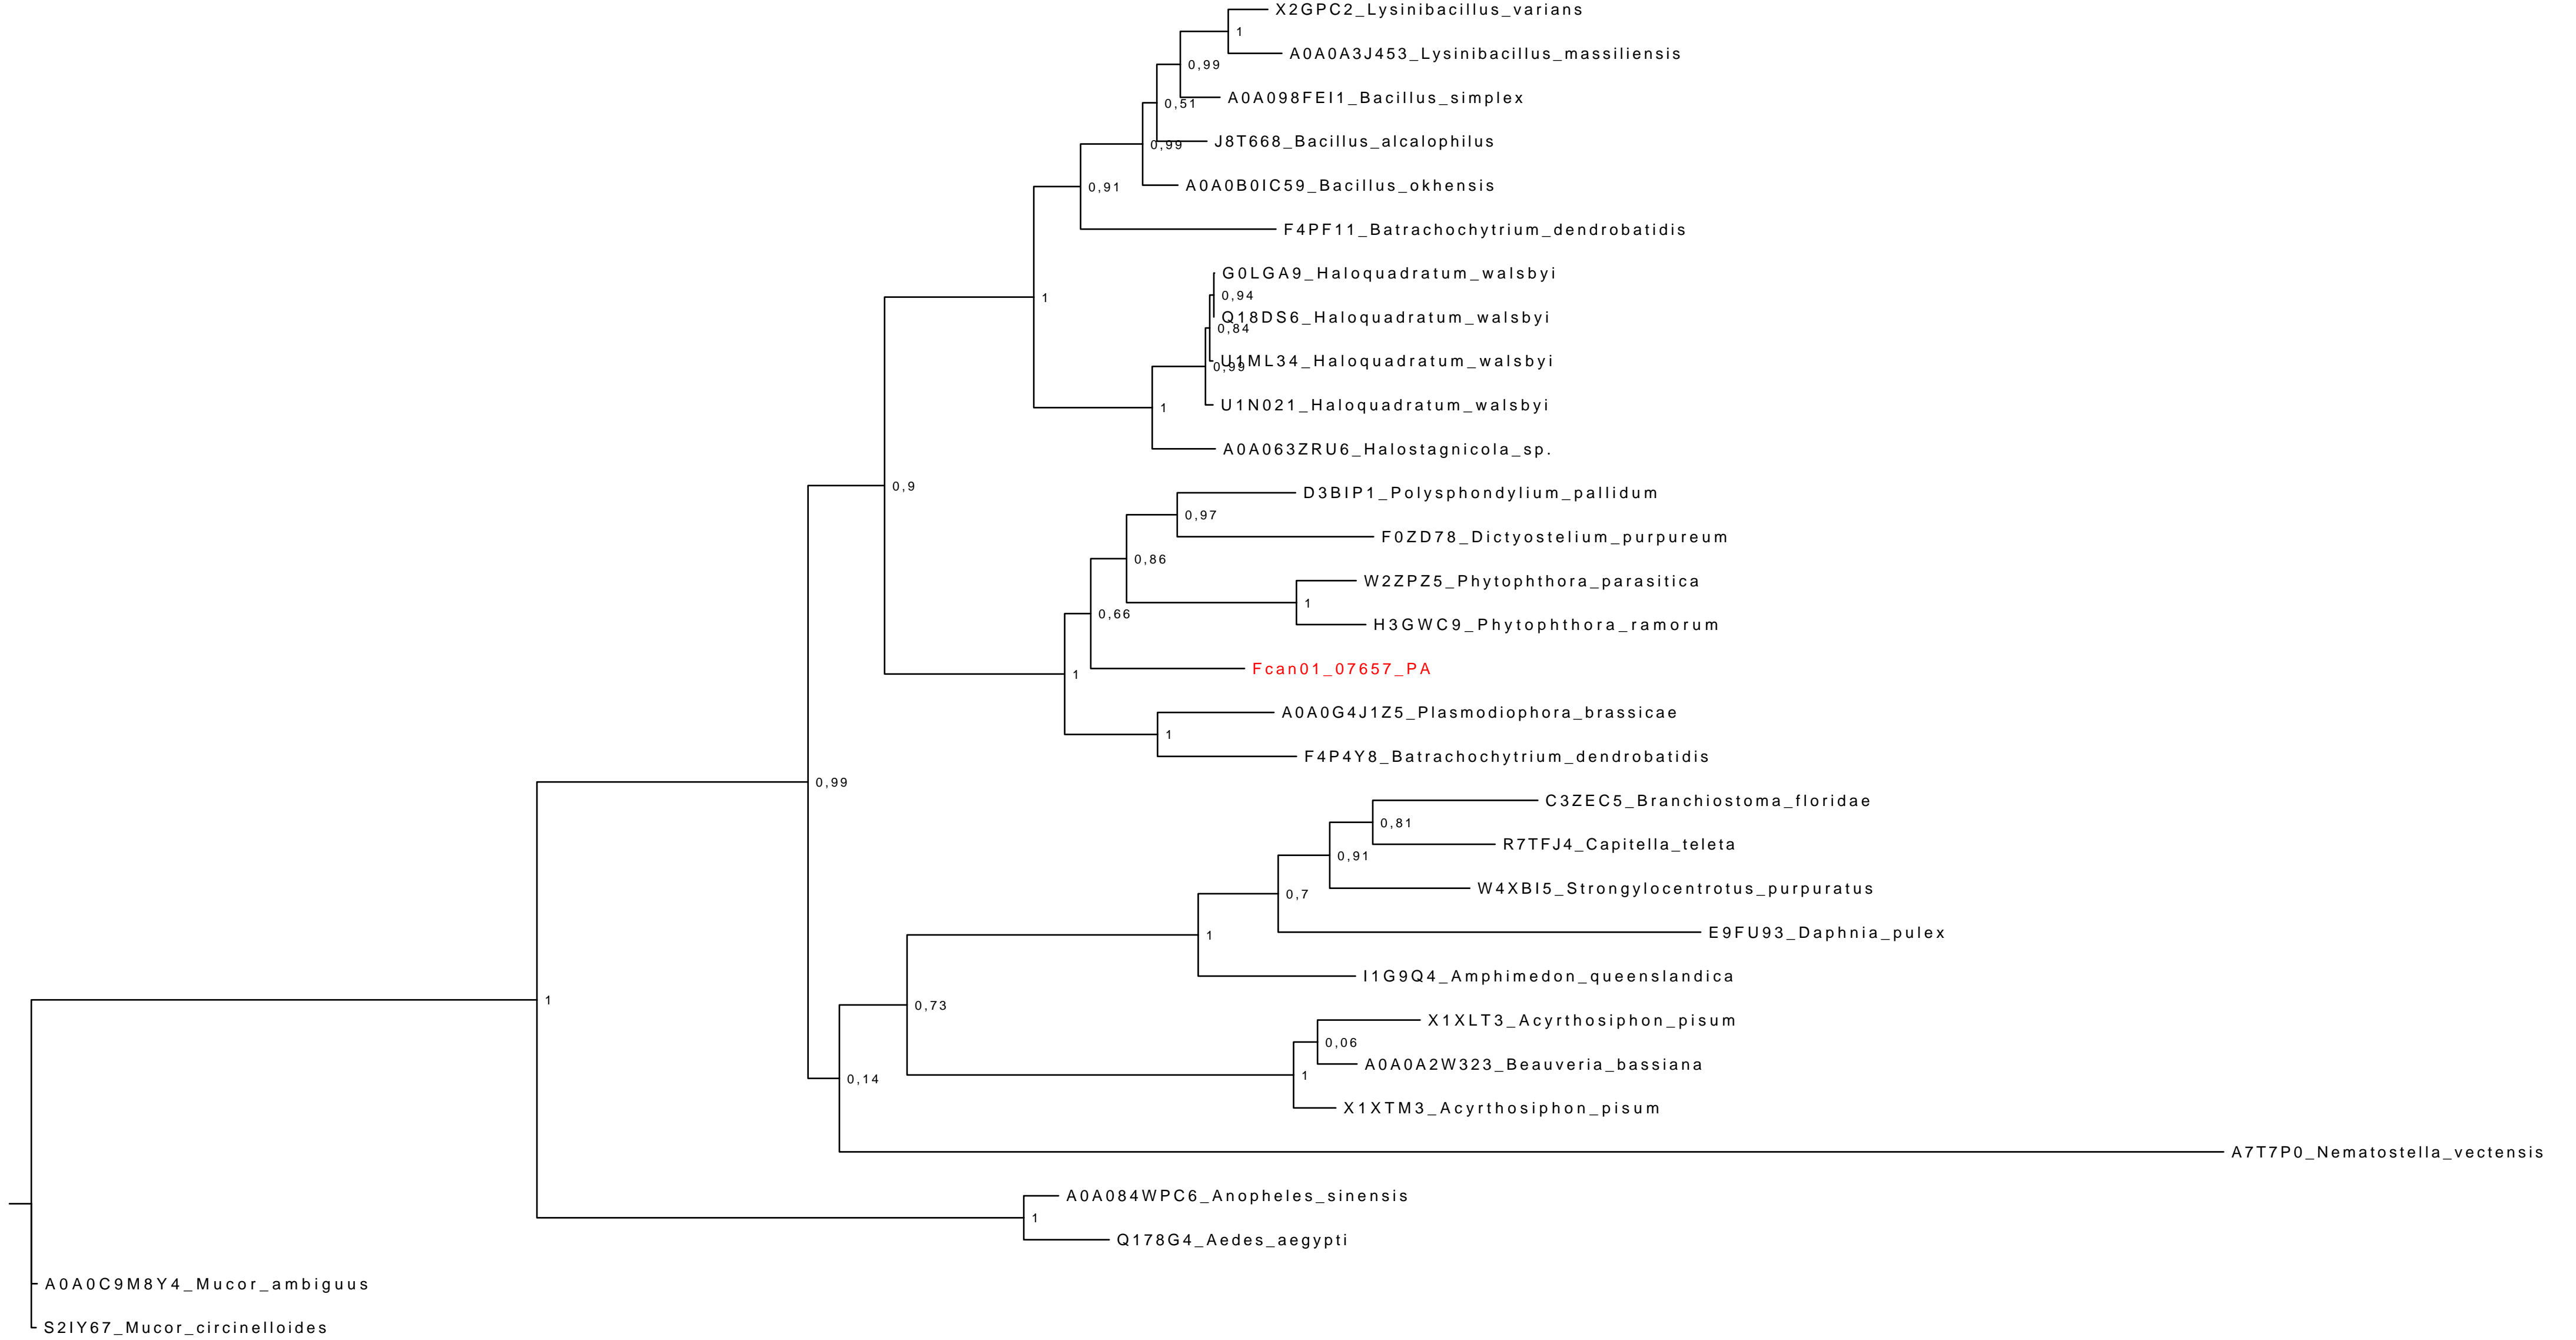

0.9



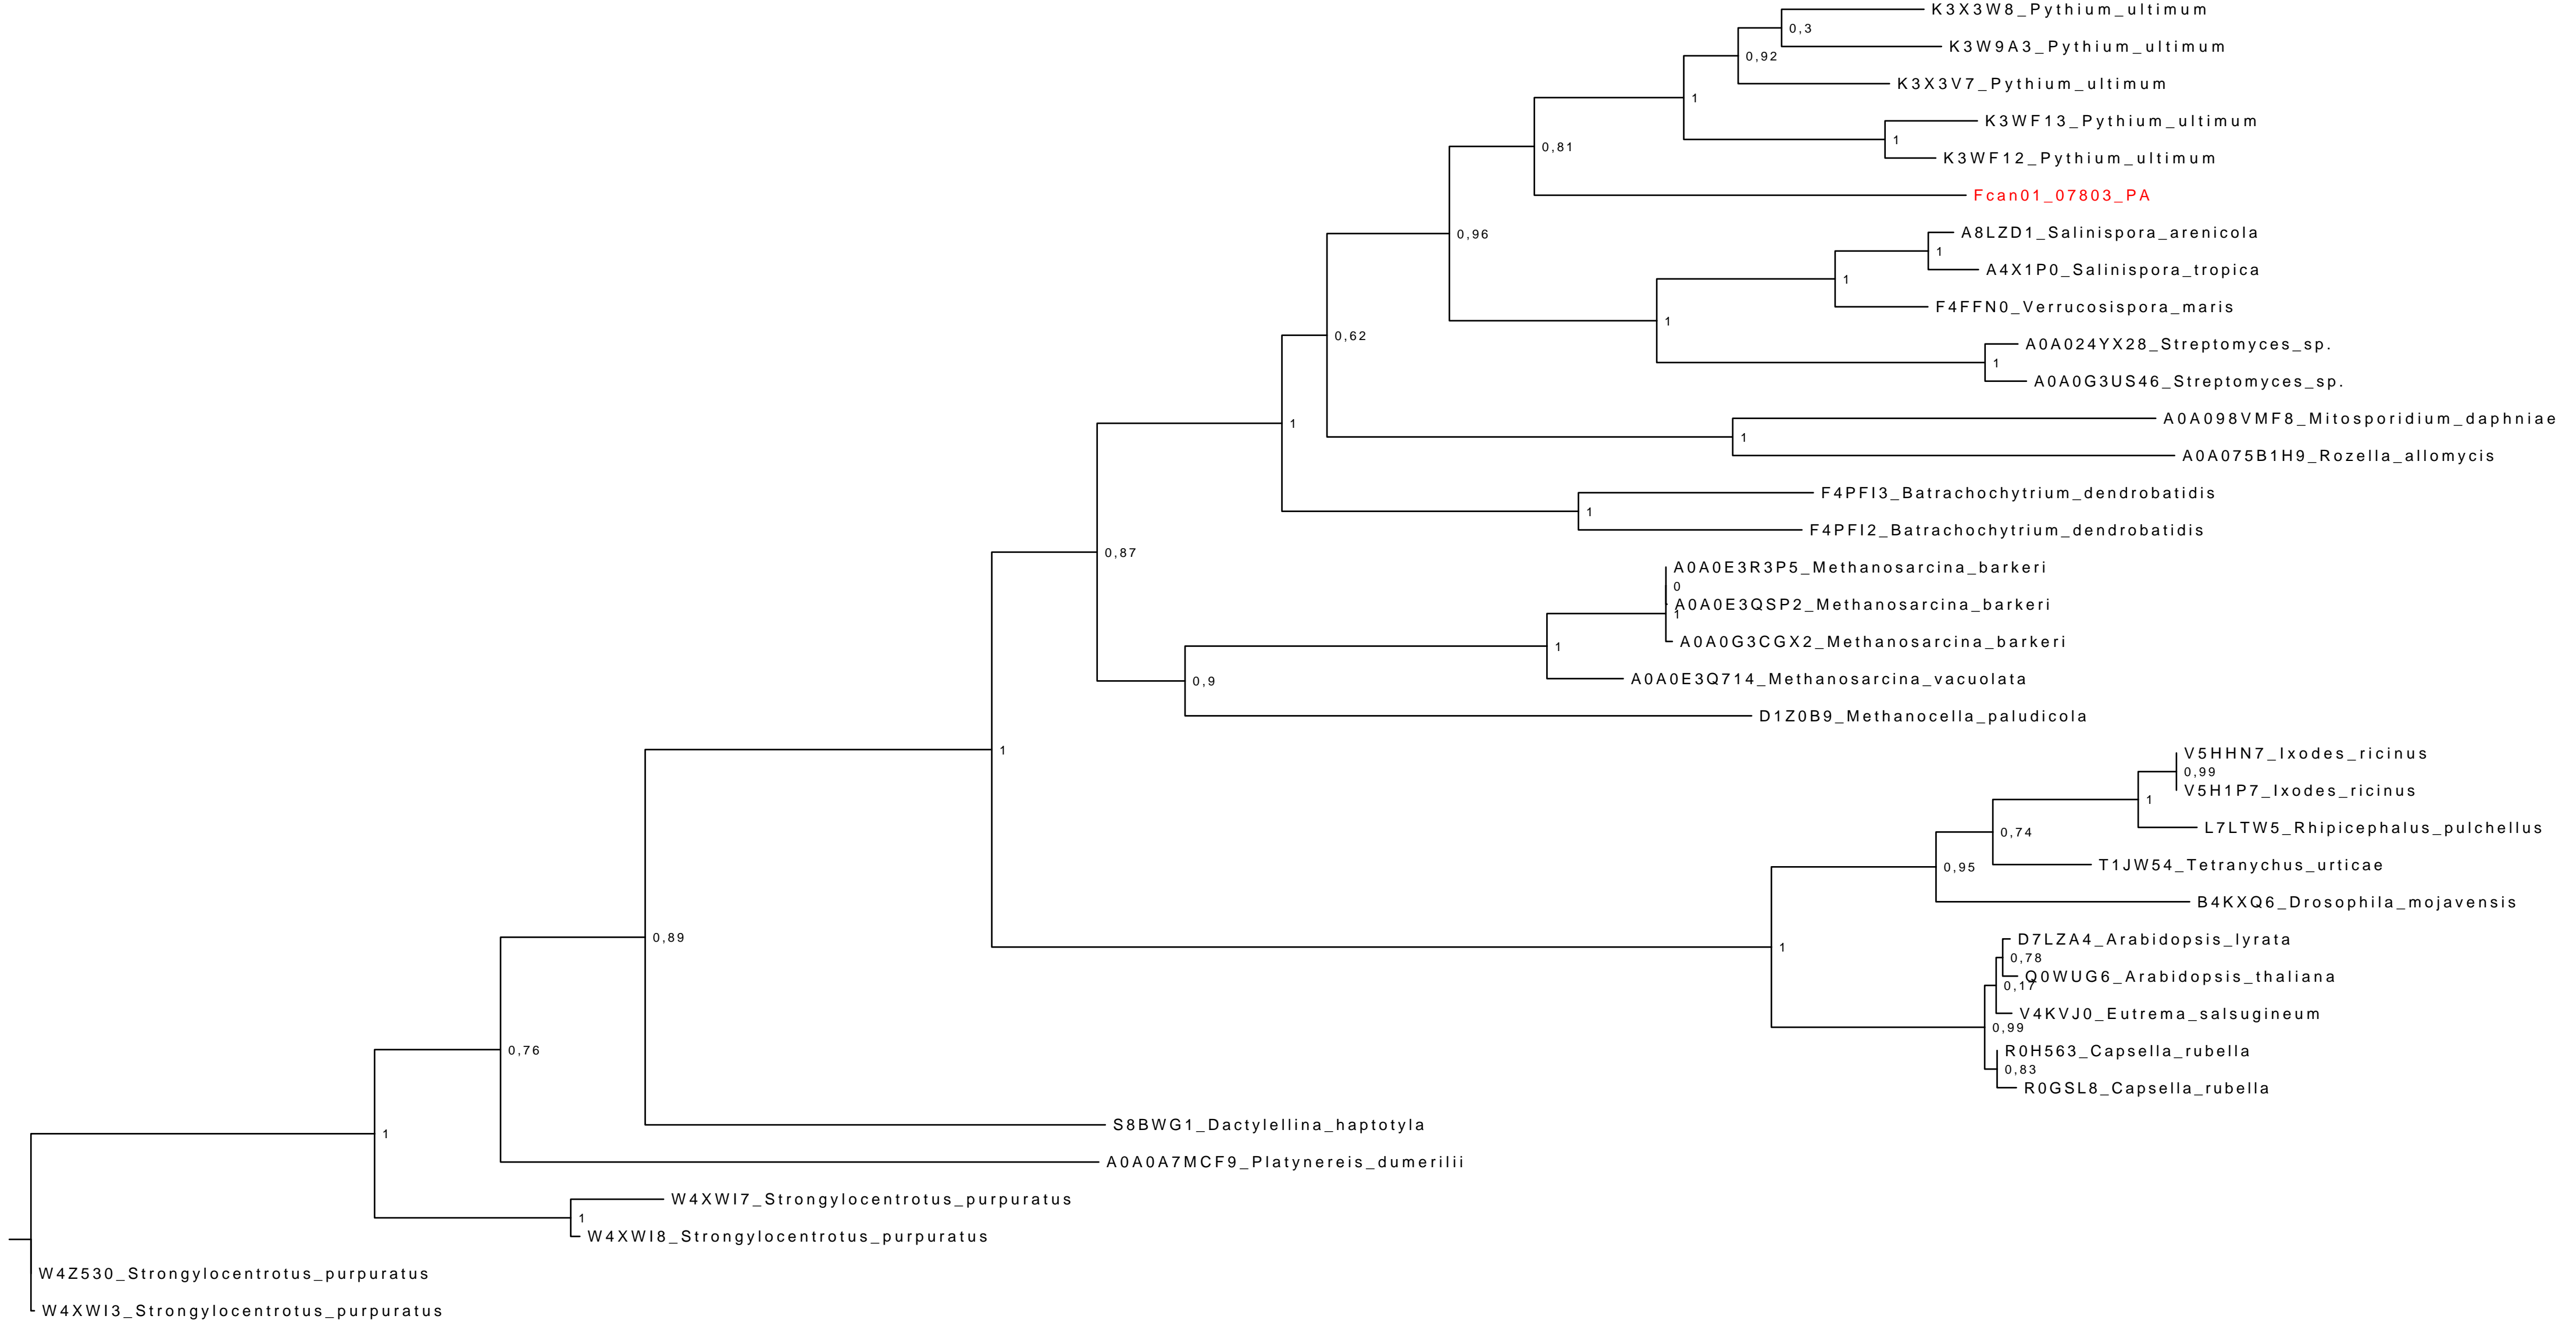

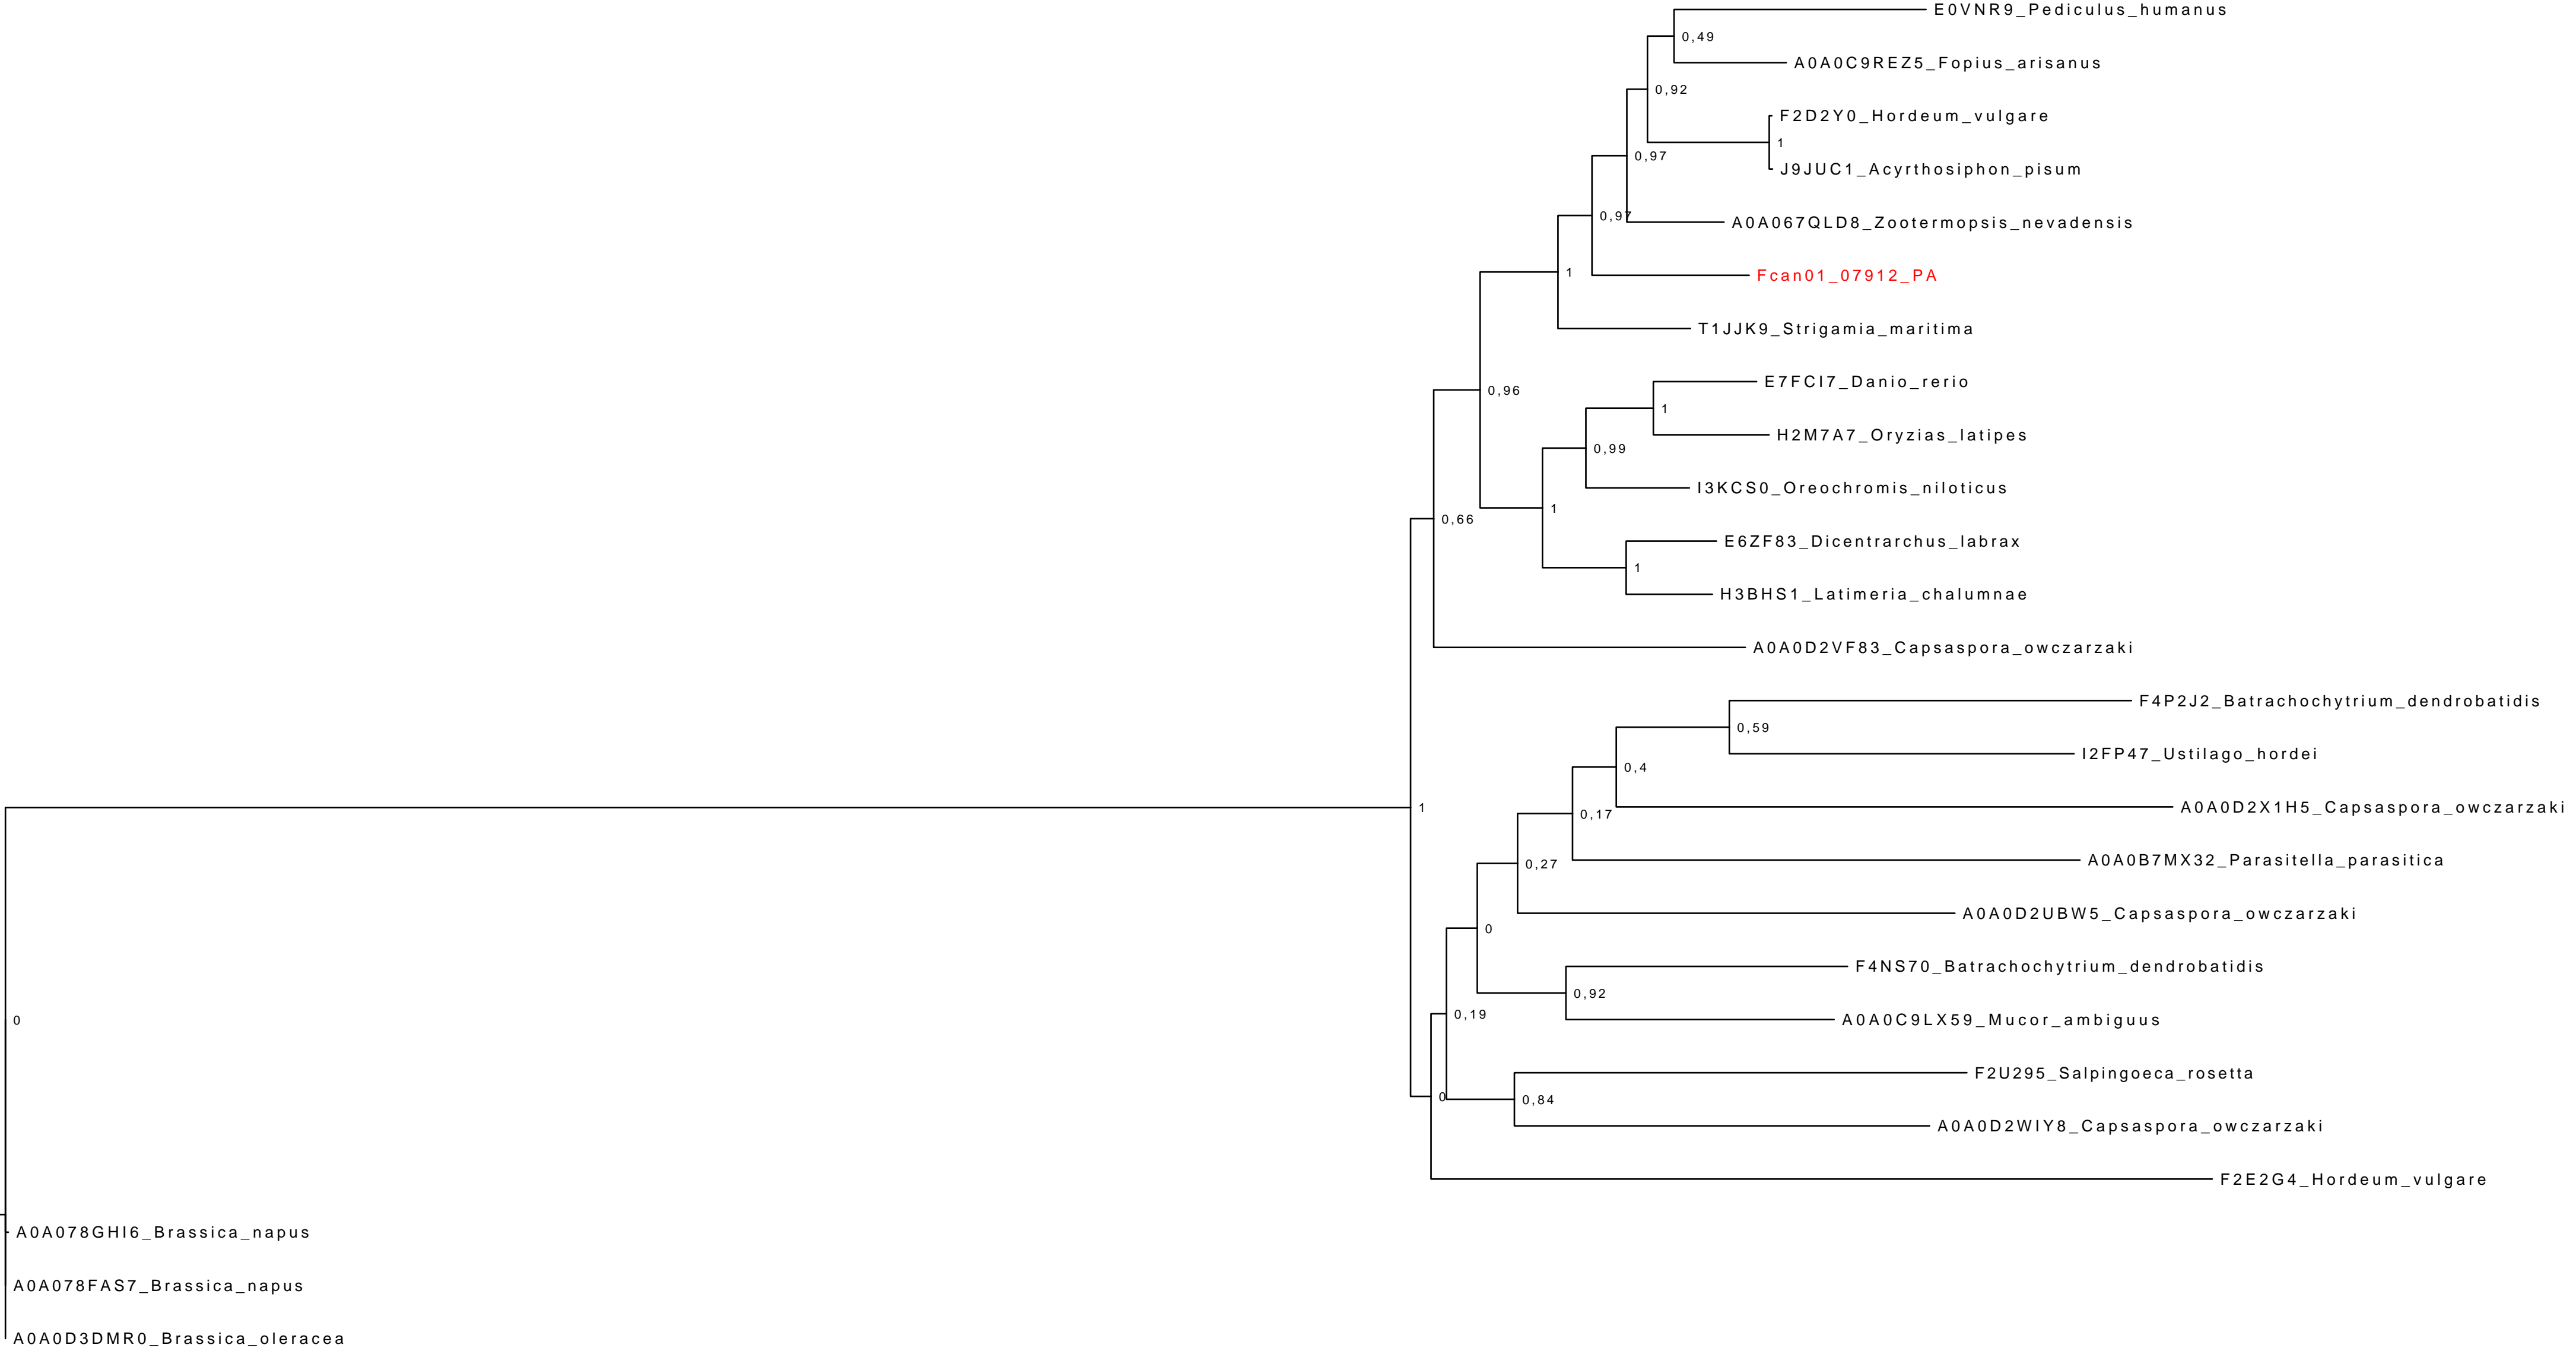

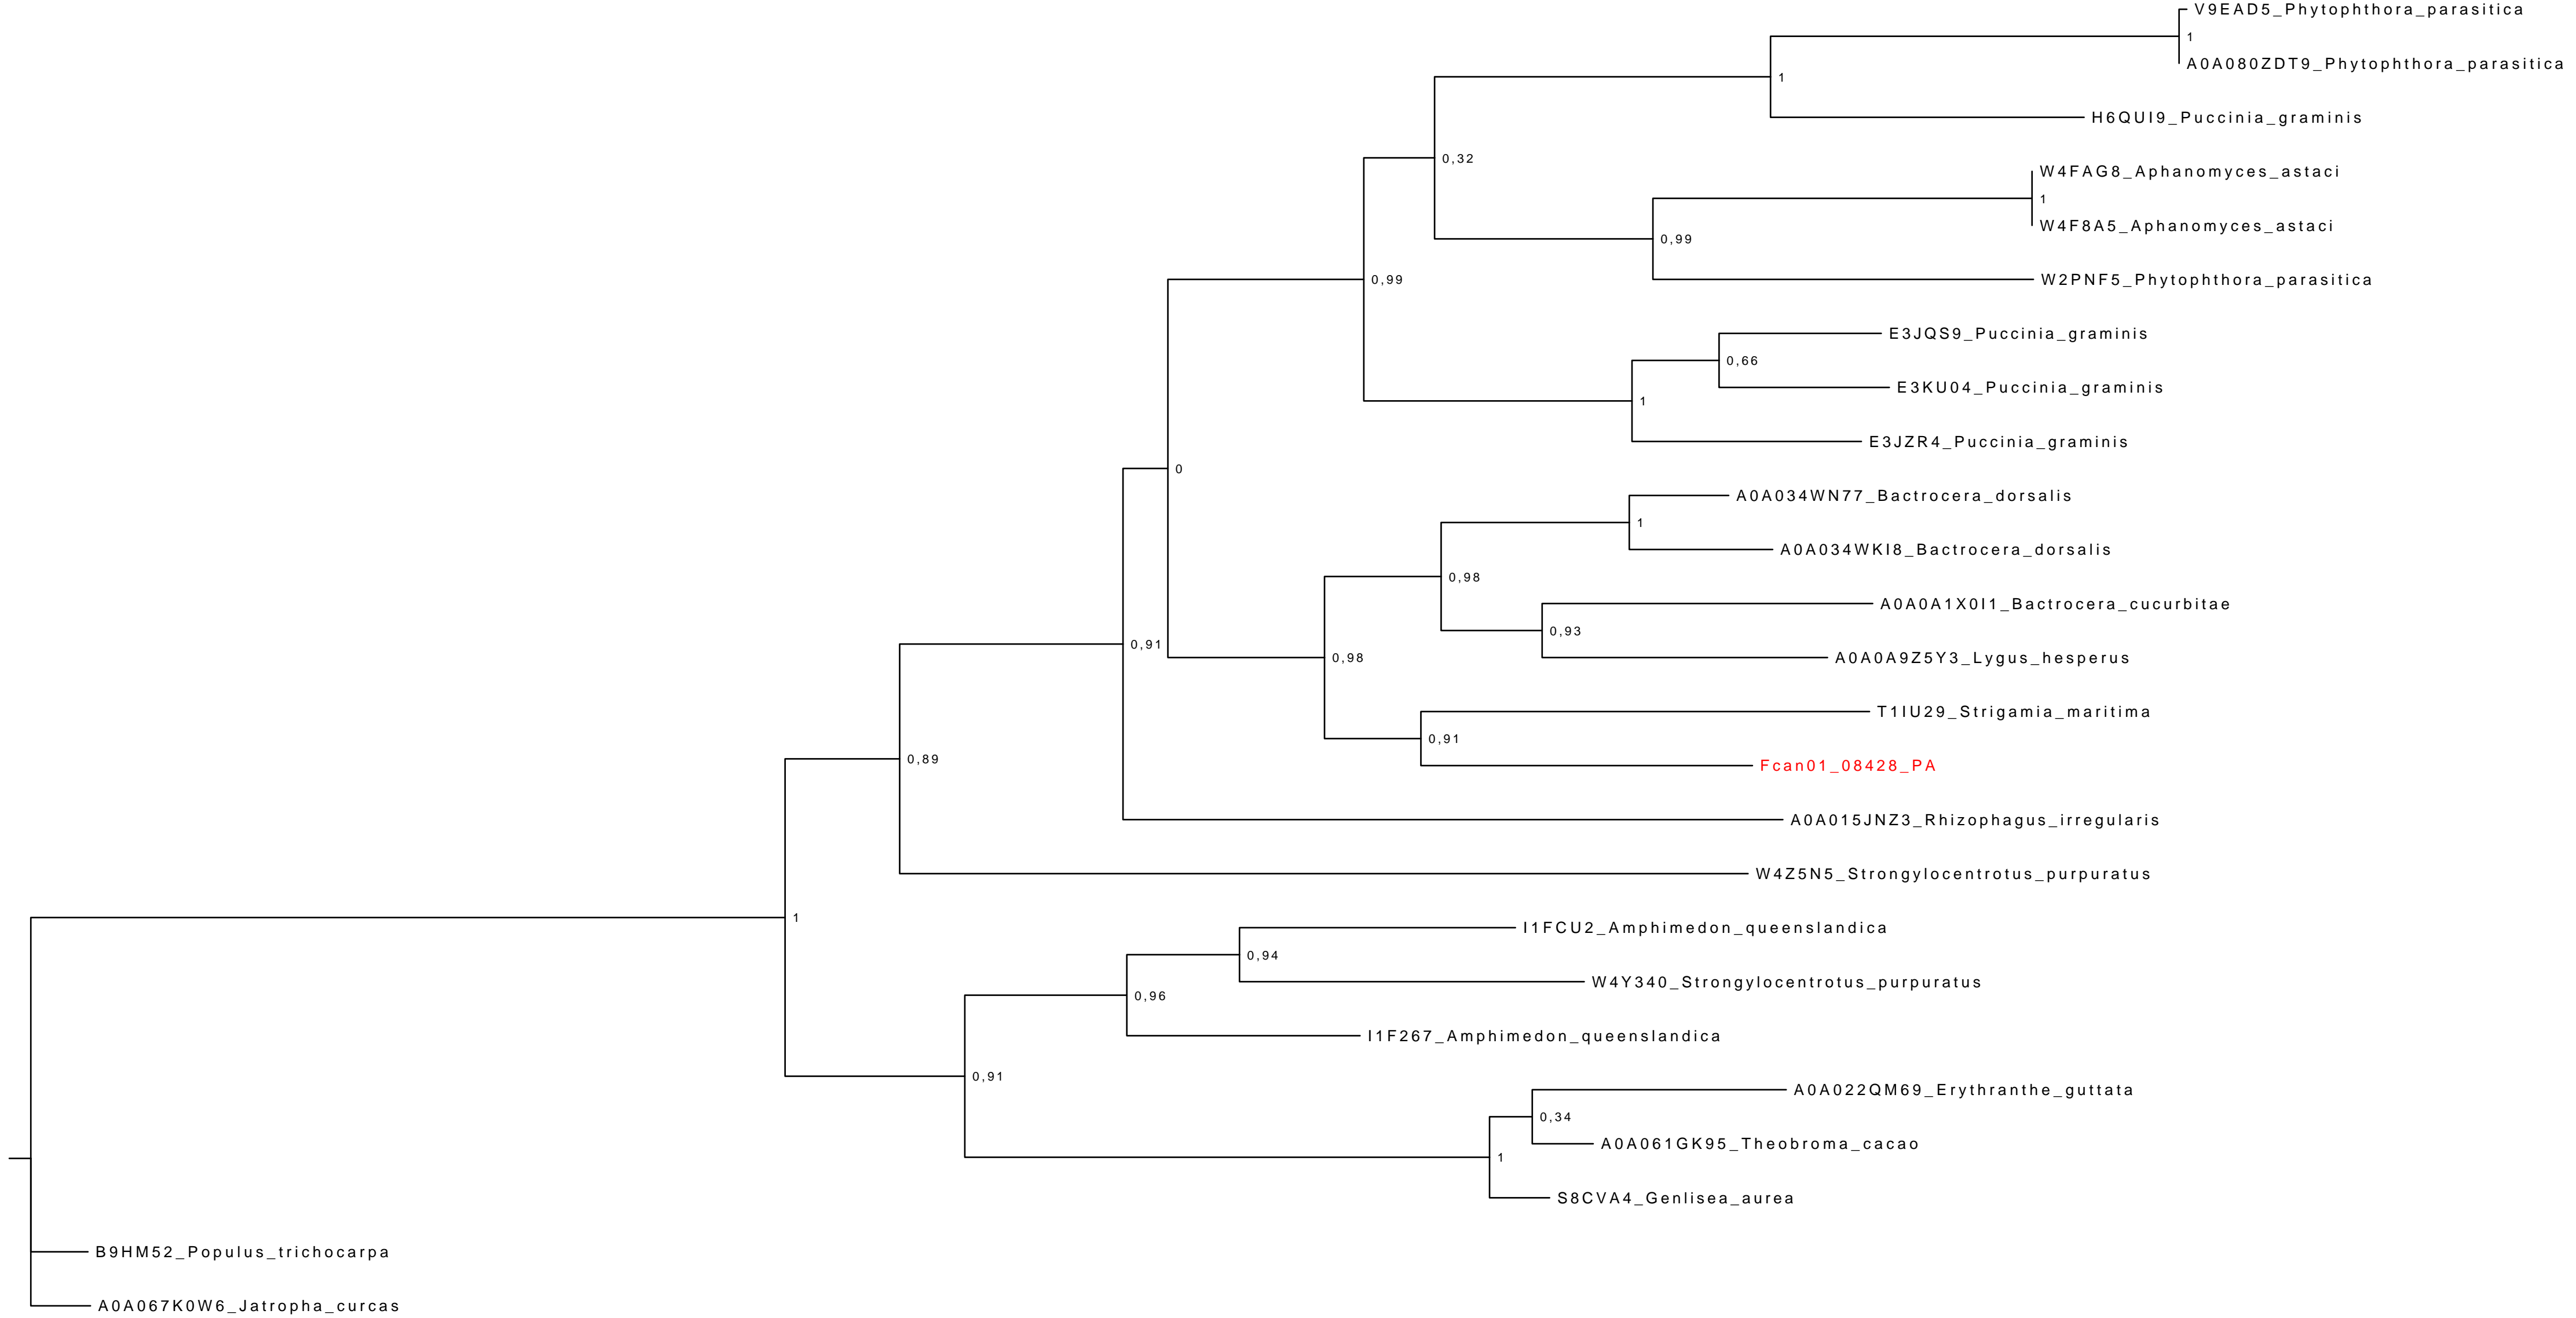

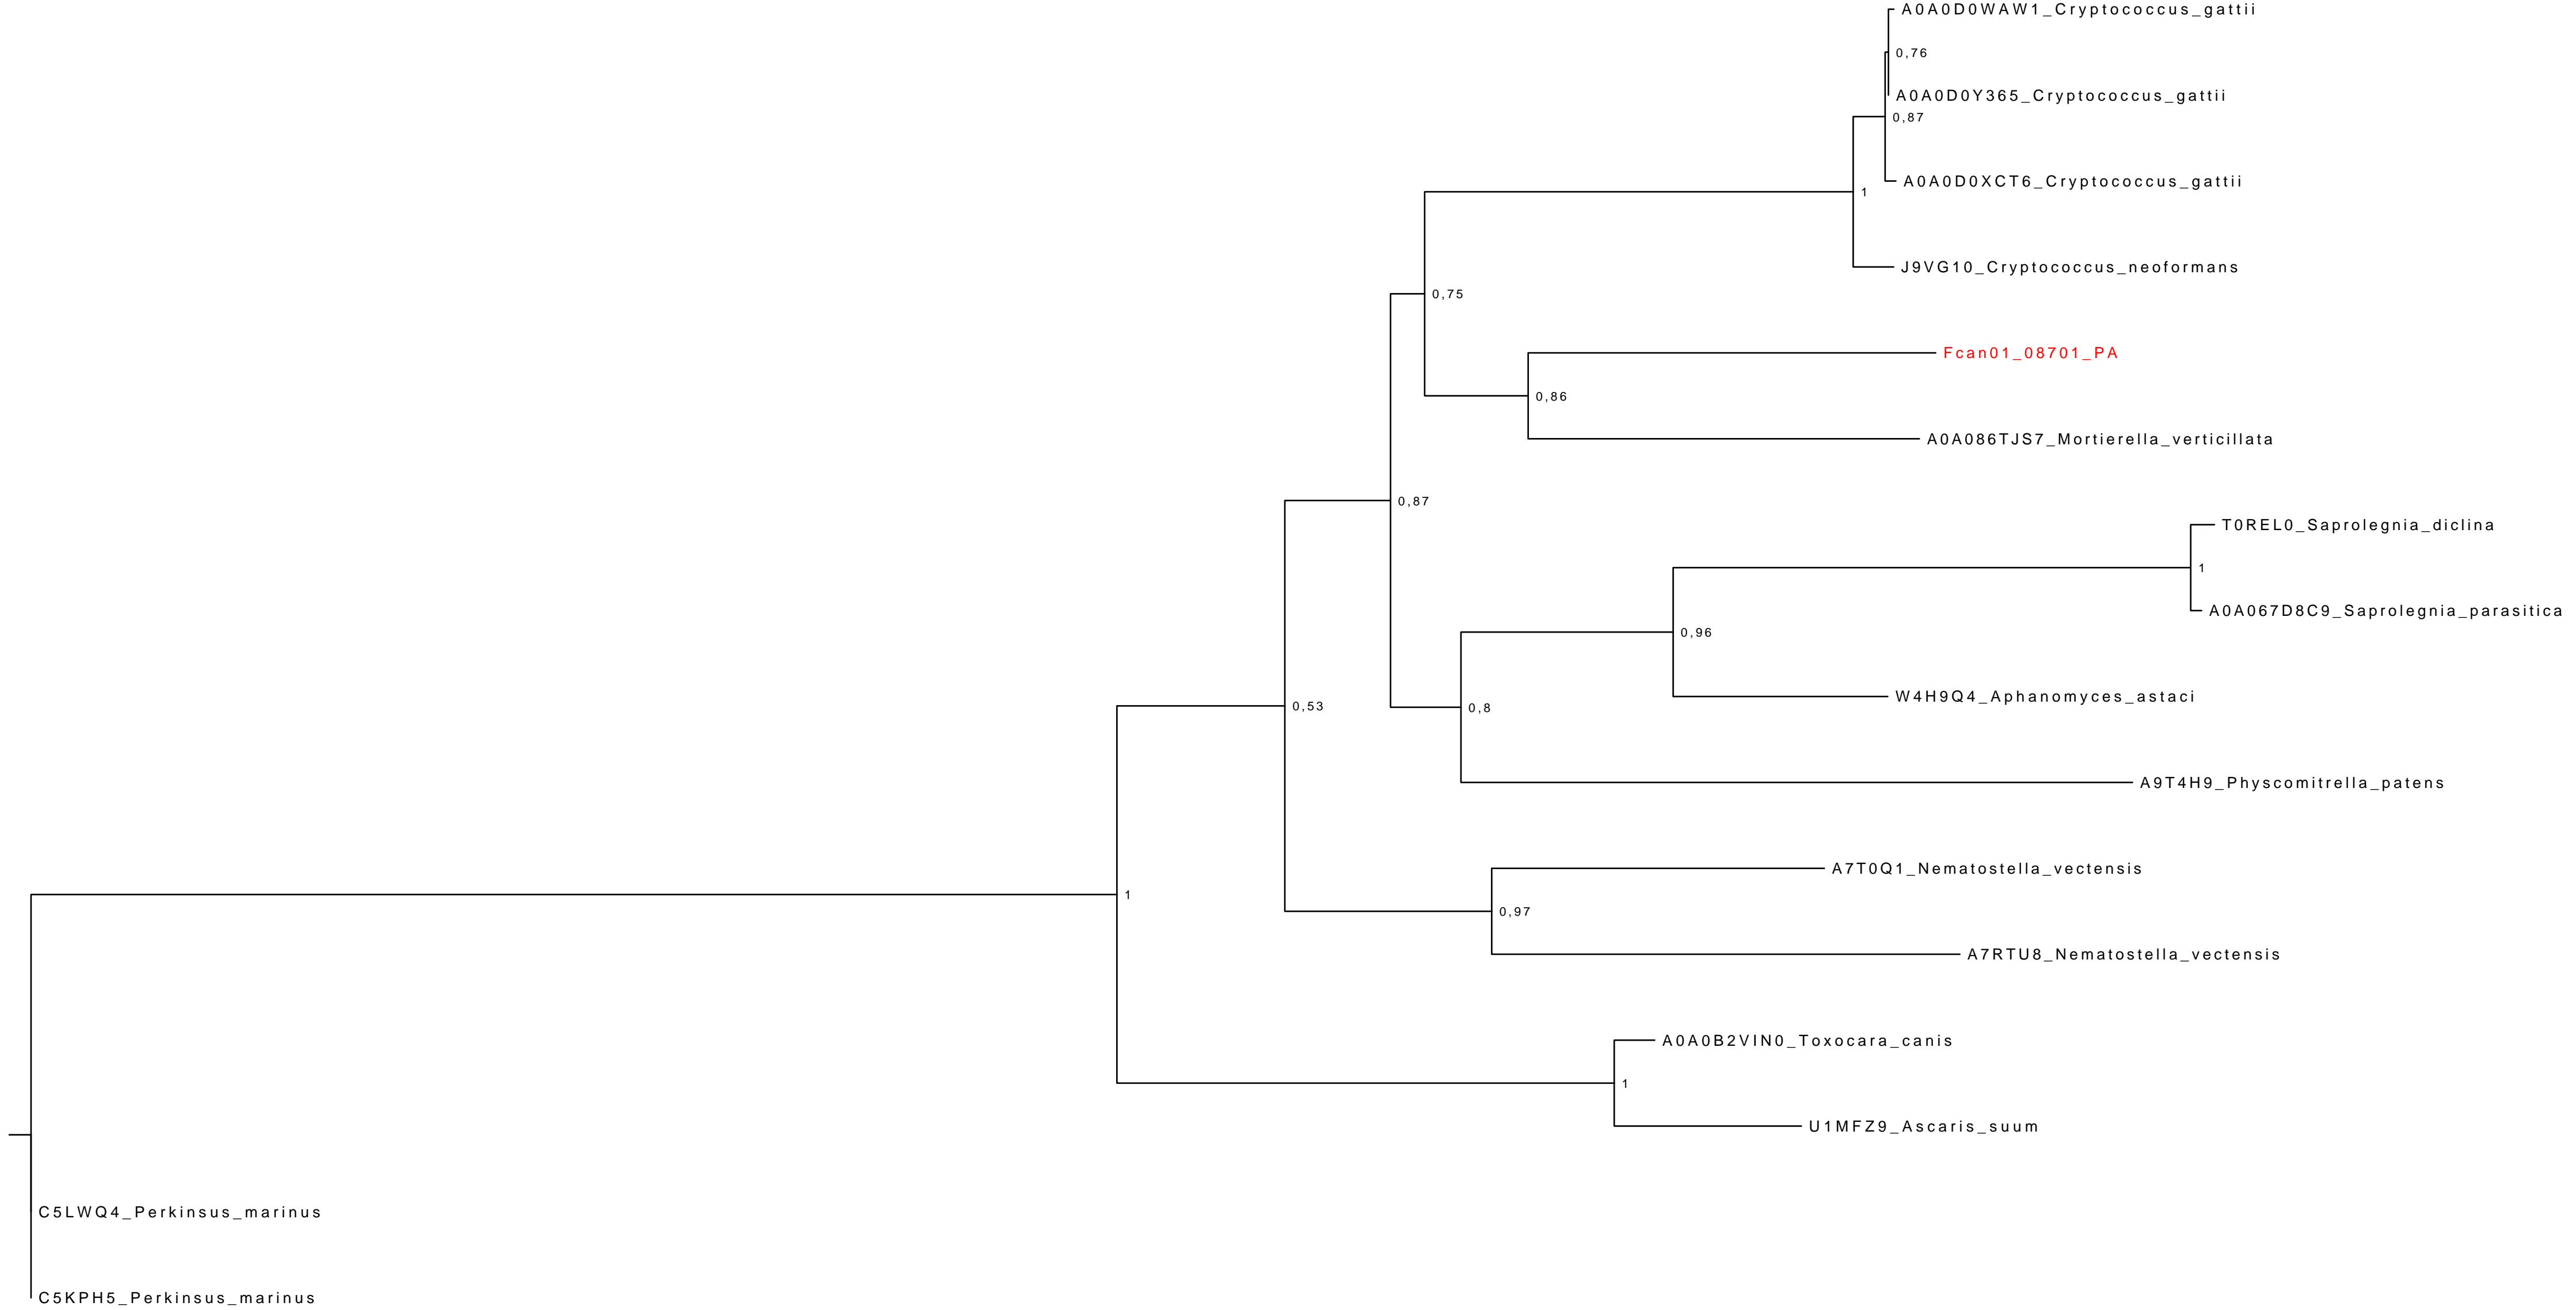

0.4

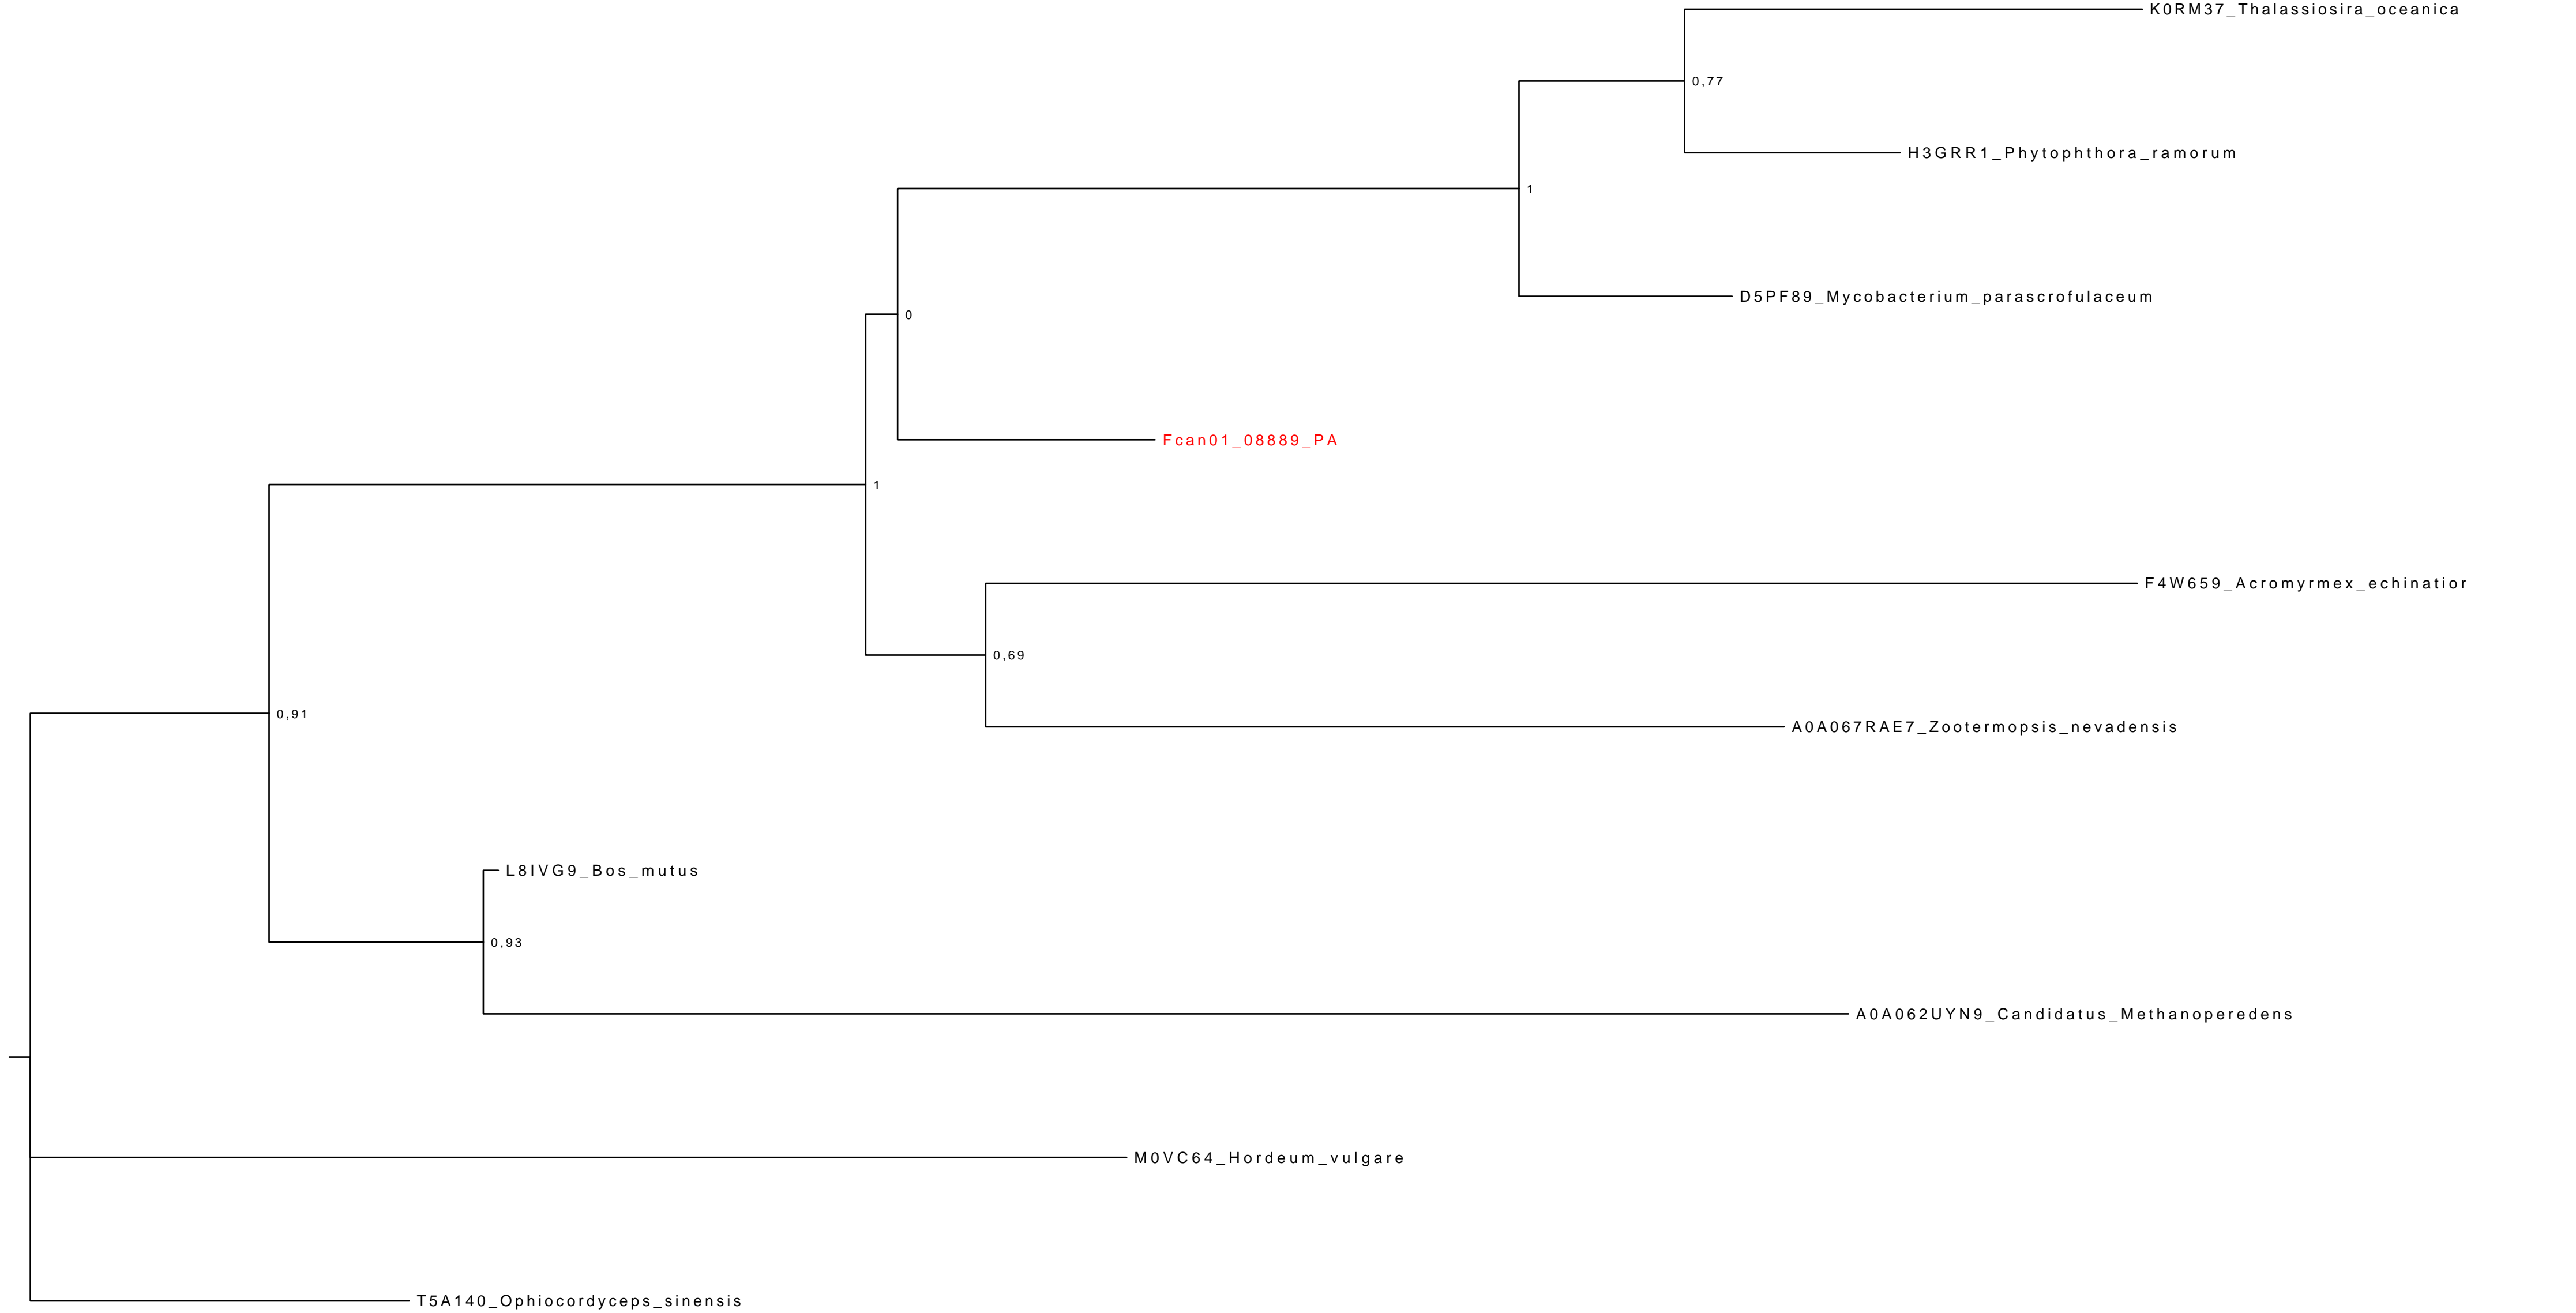

0.5

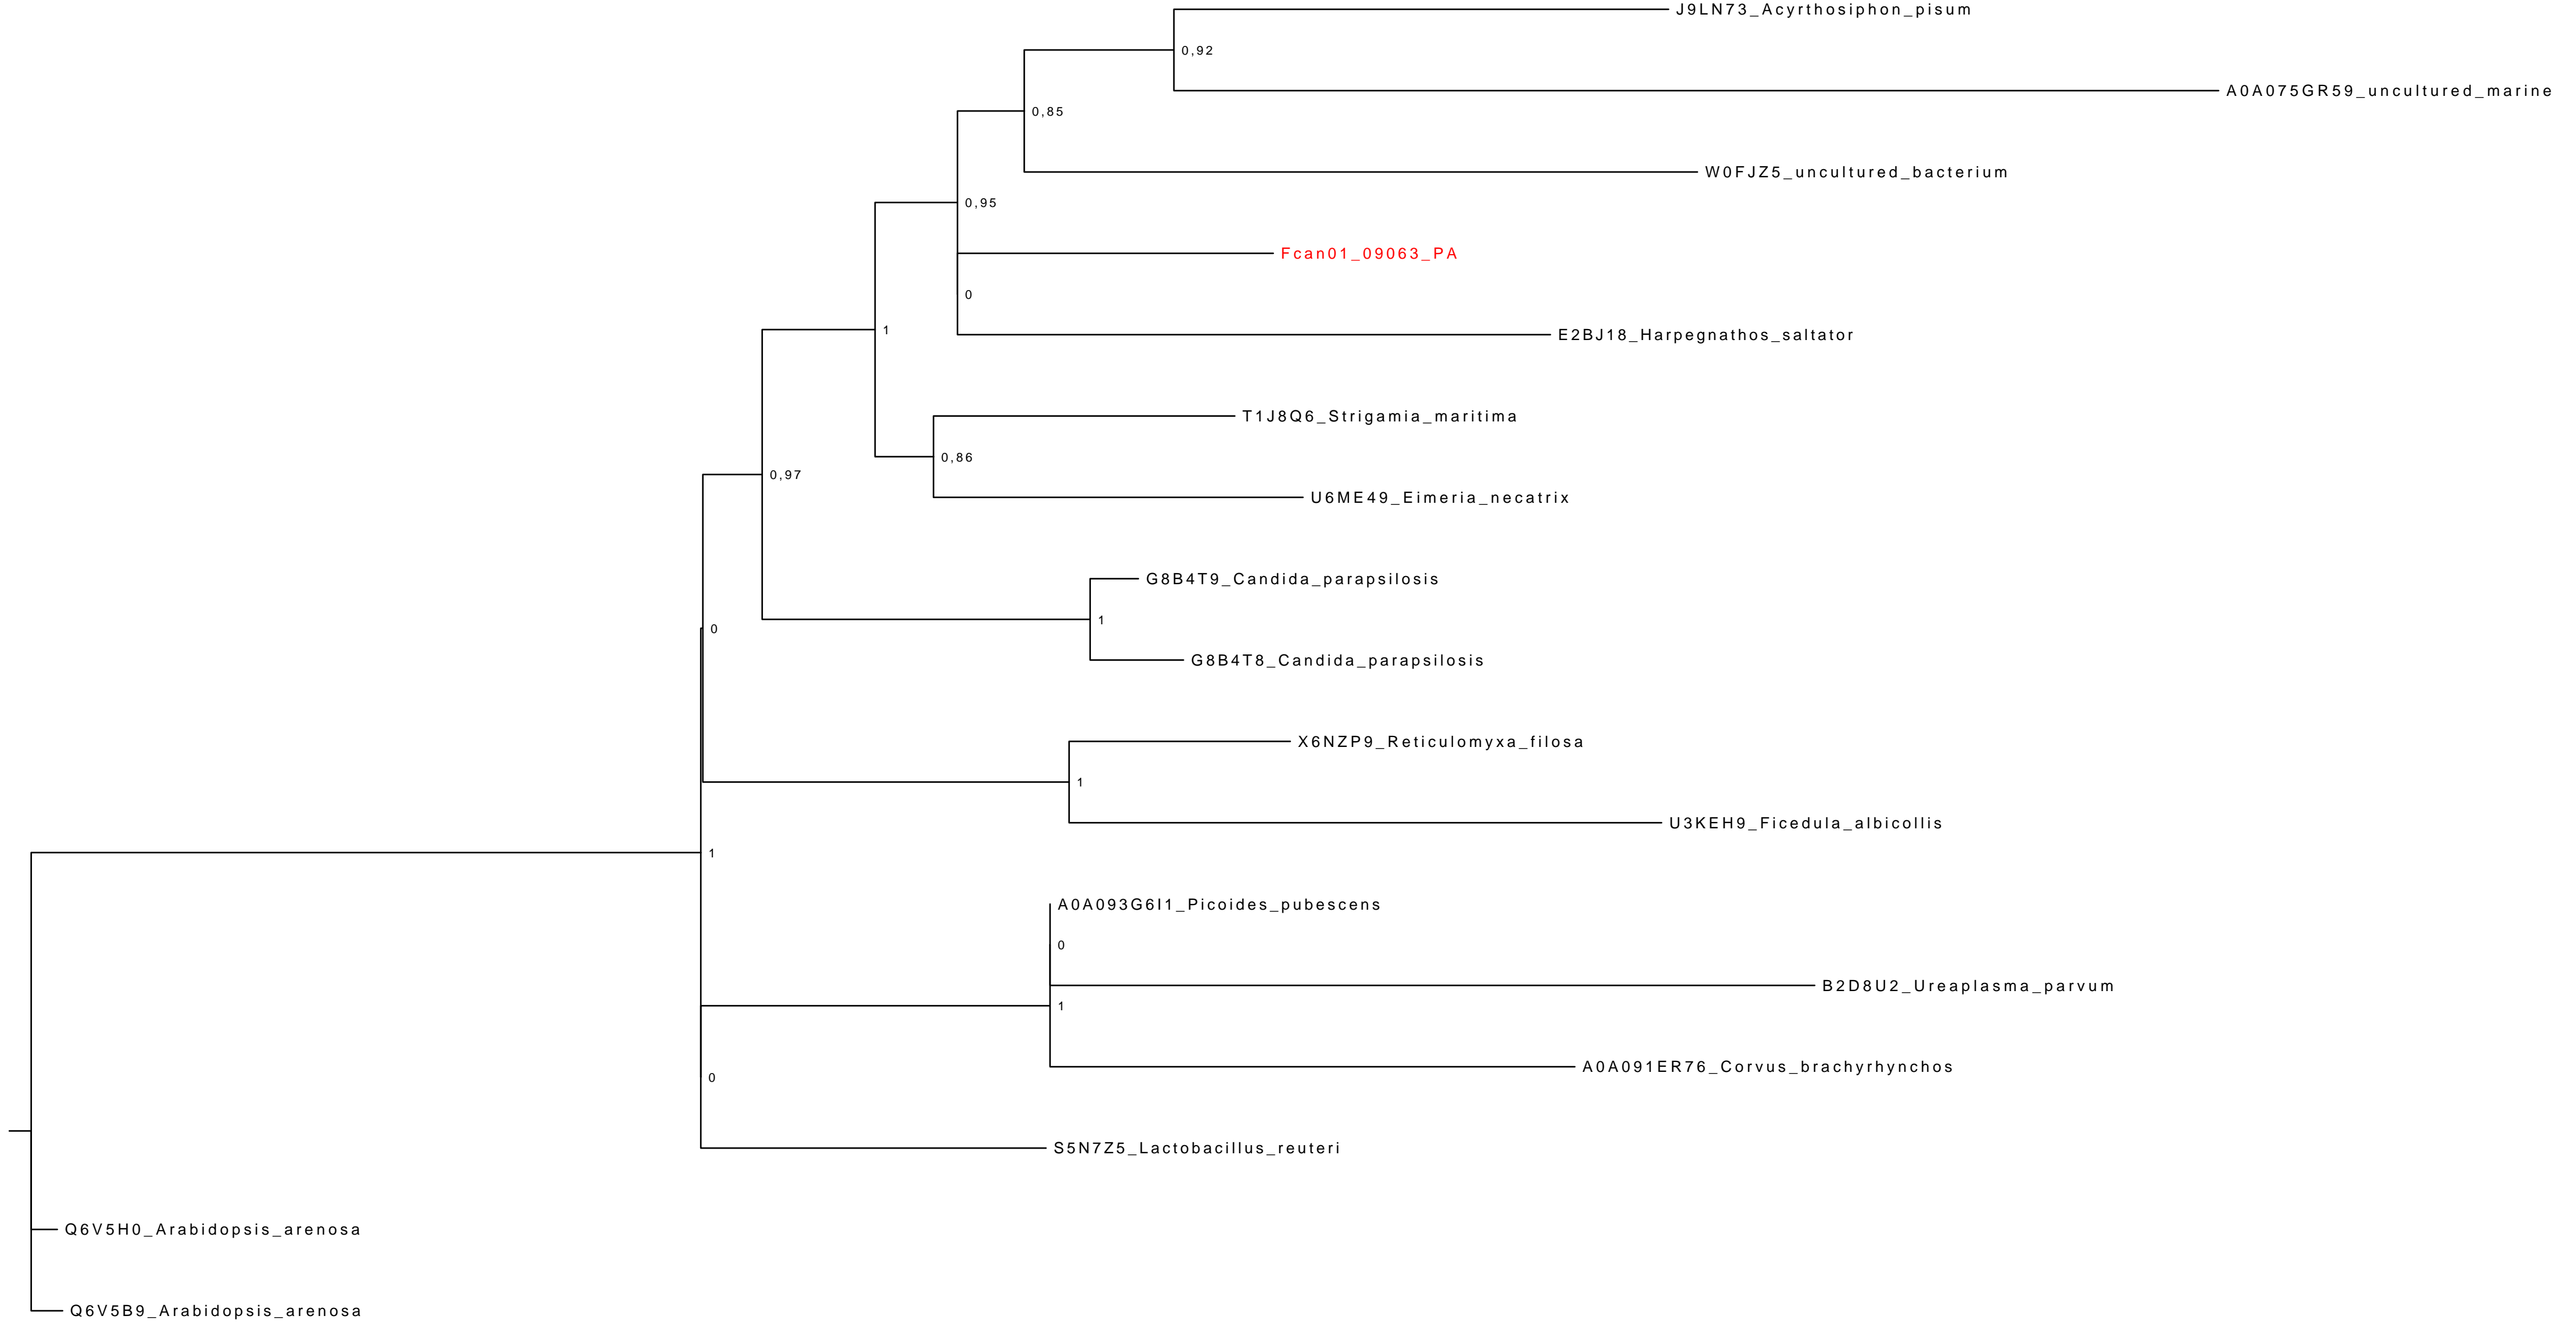

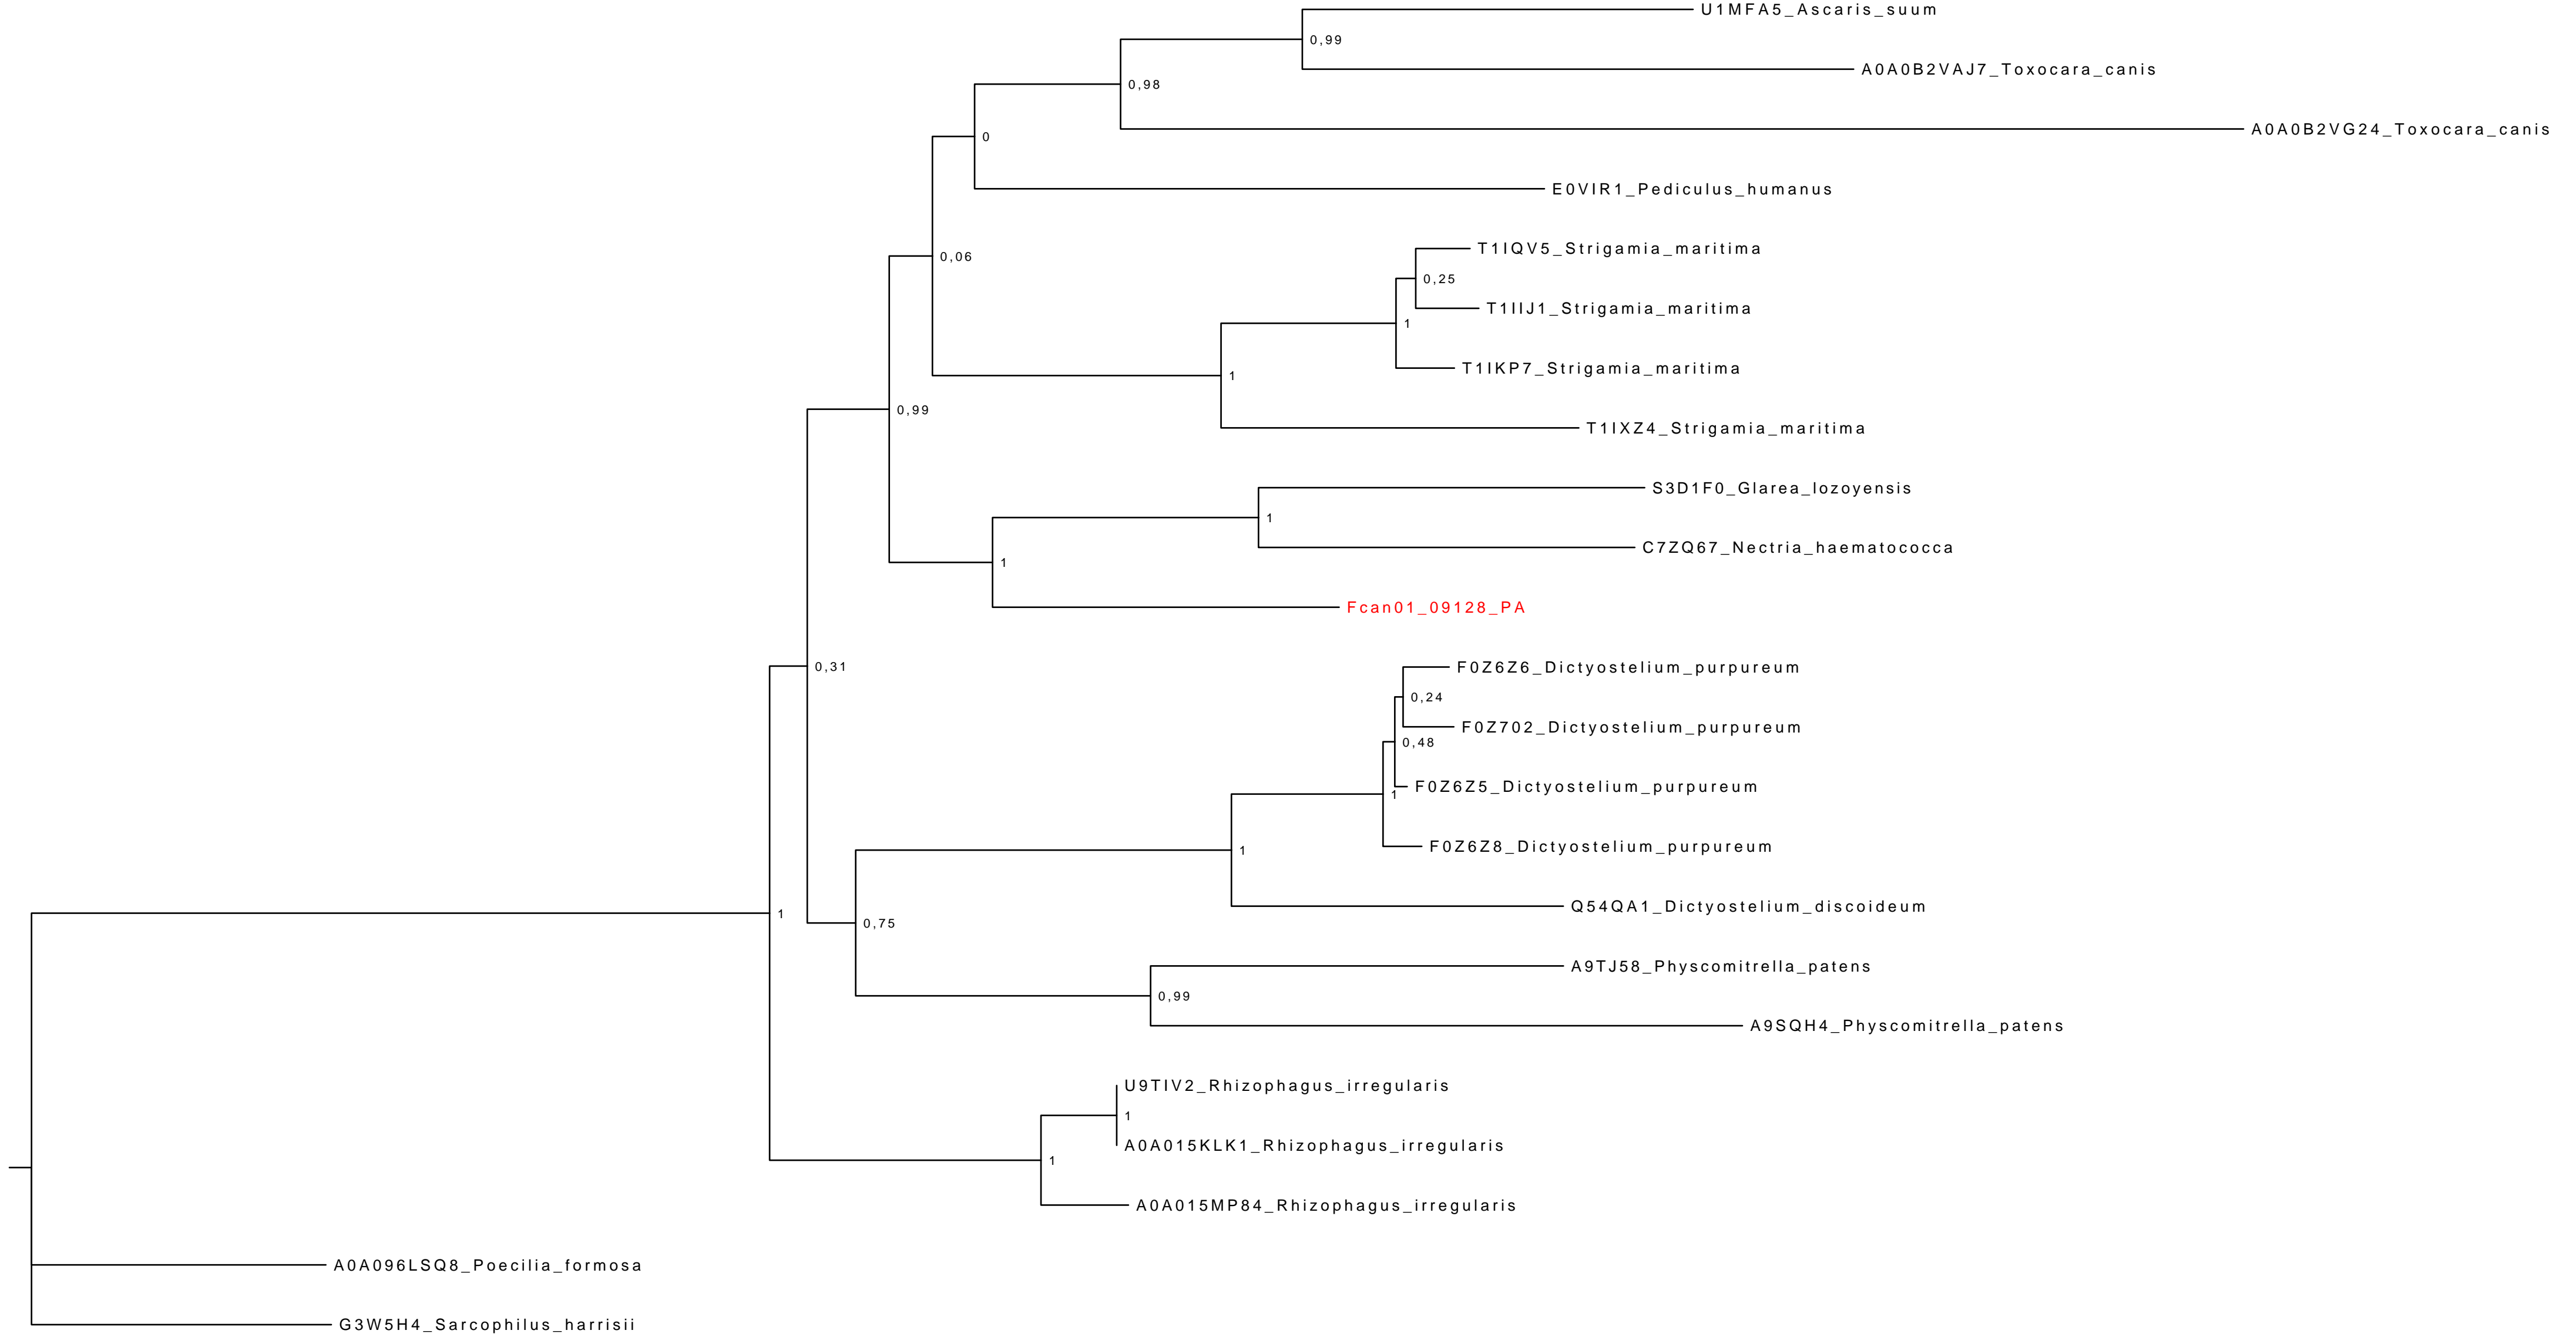

0.5

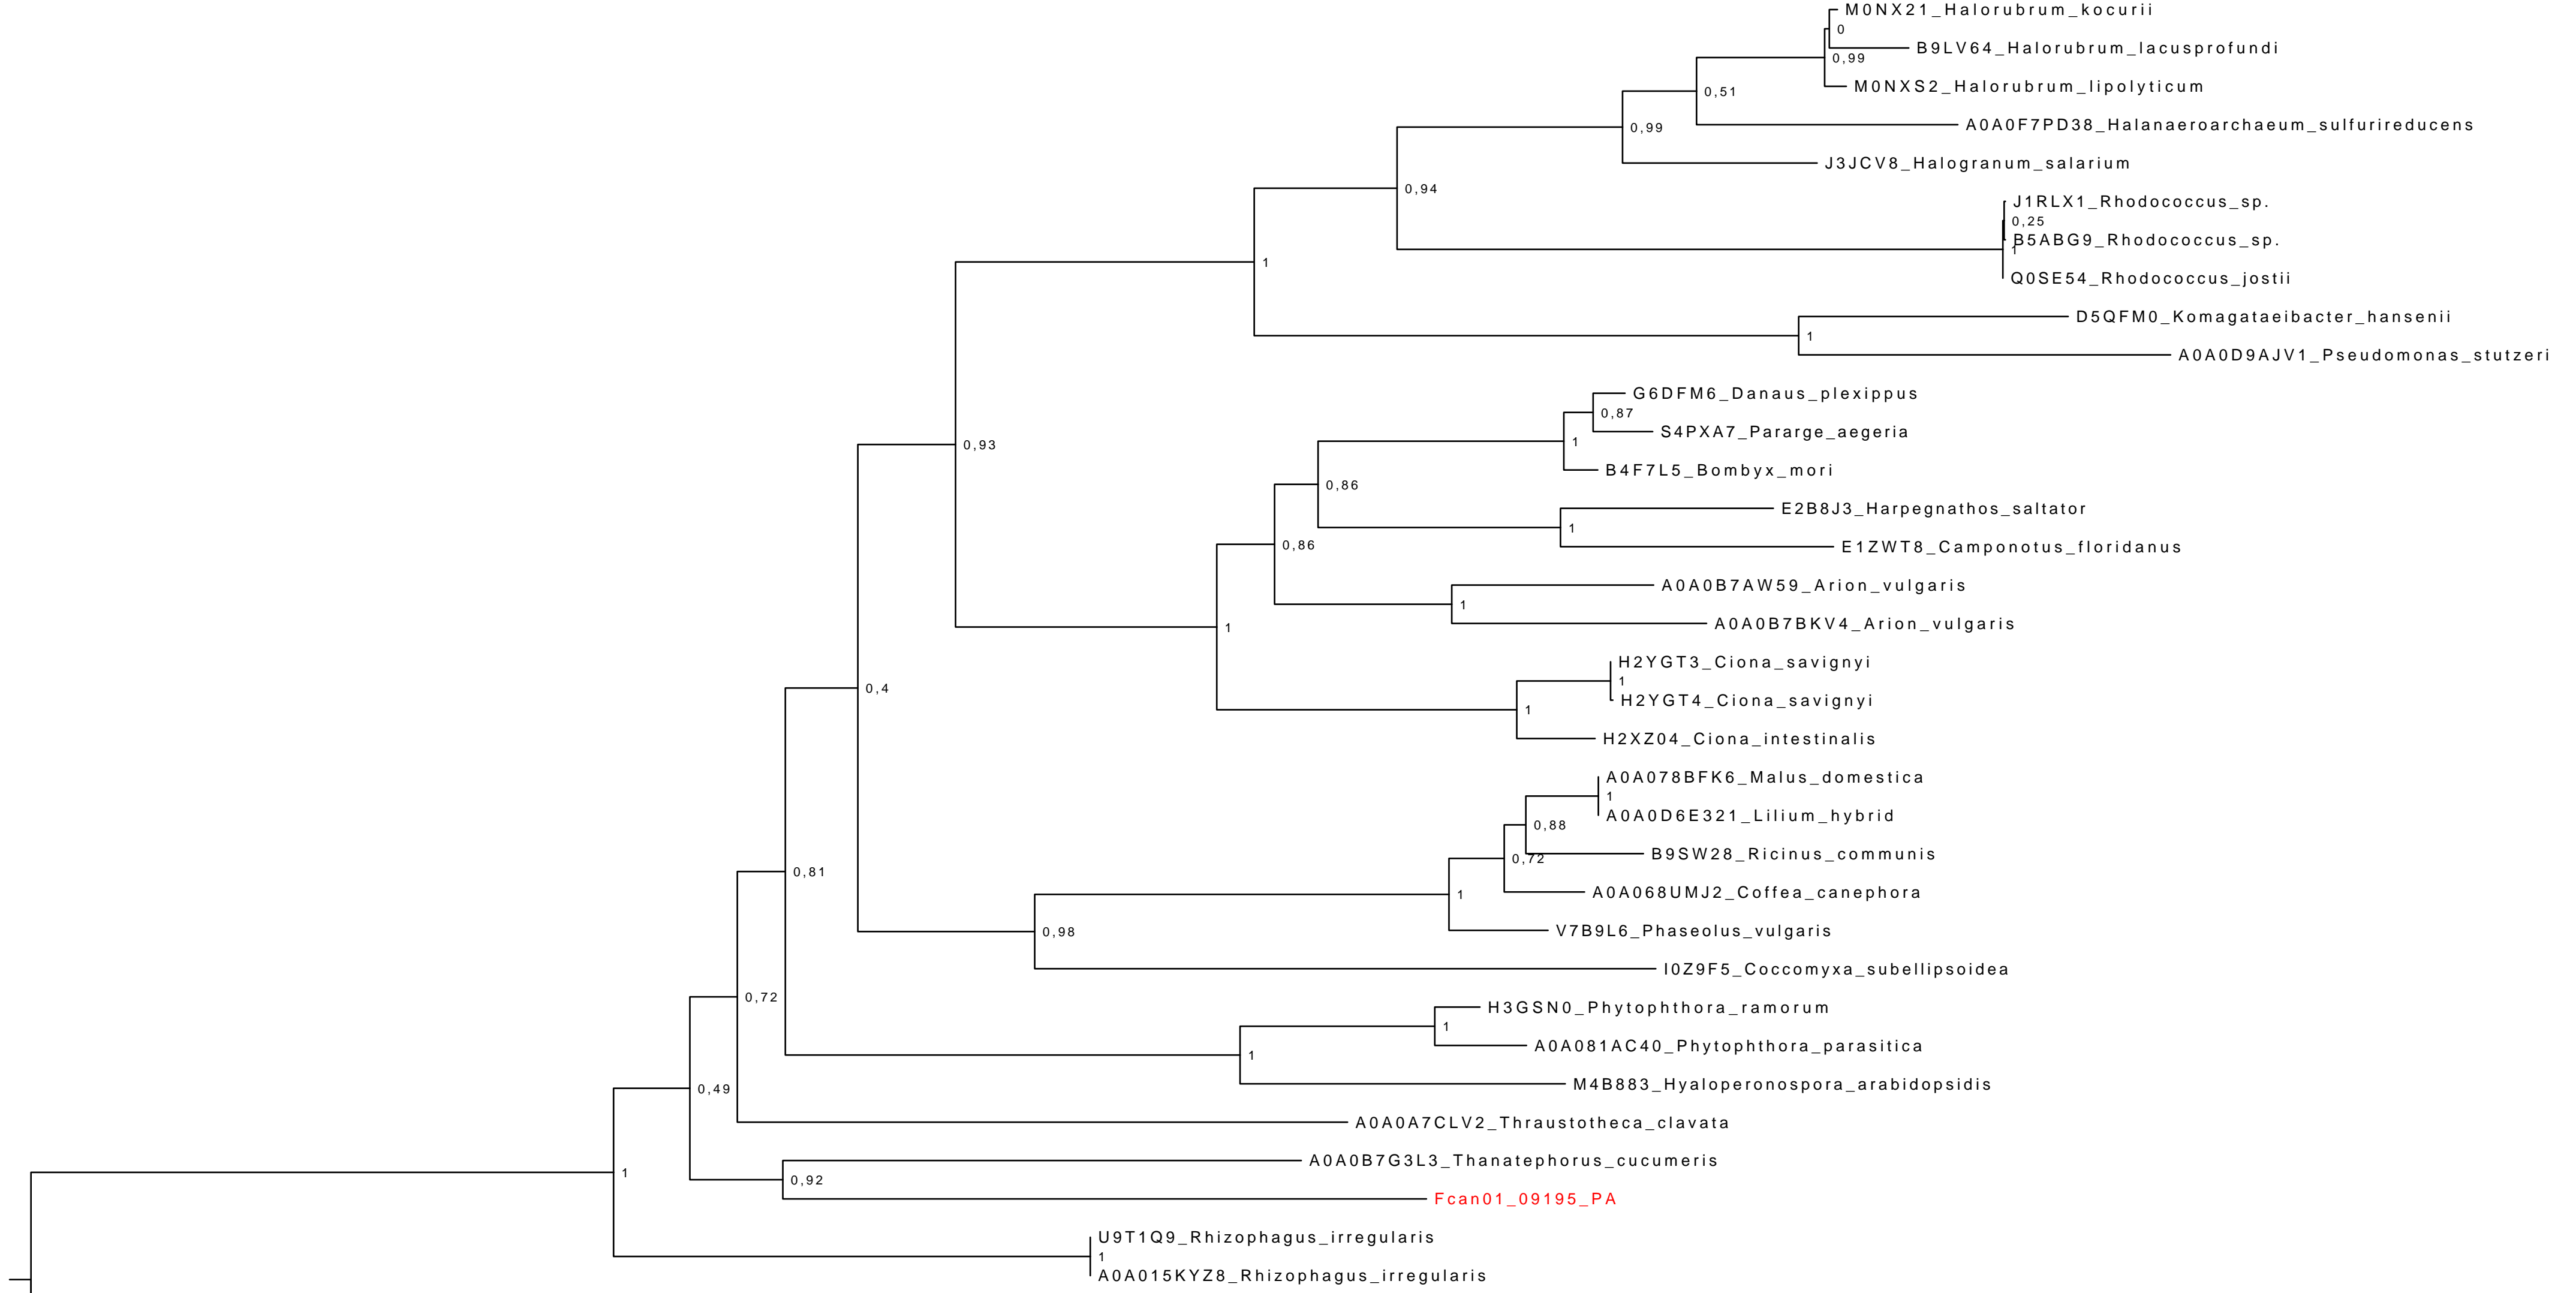

L716M2\_Magnaporthe\_oryzae  
 G4NBF8\_Magnaporthe\_oryzae

0.4



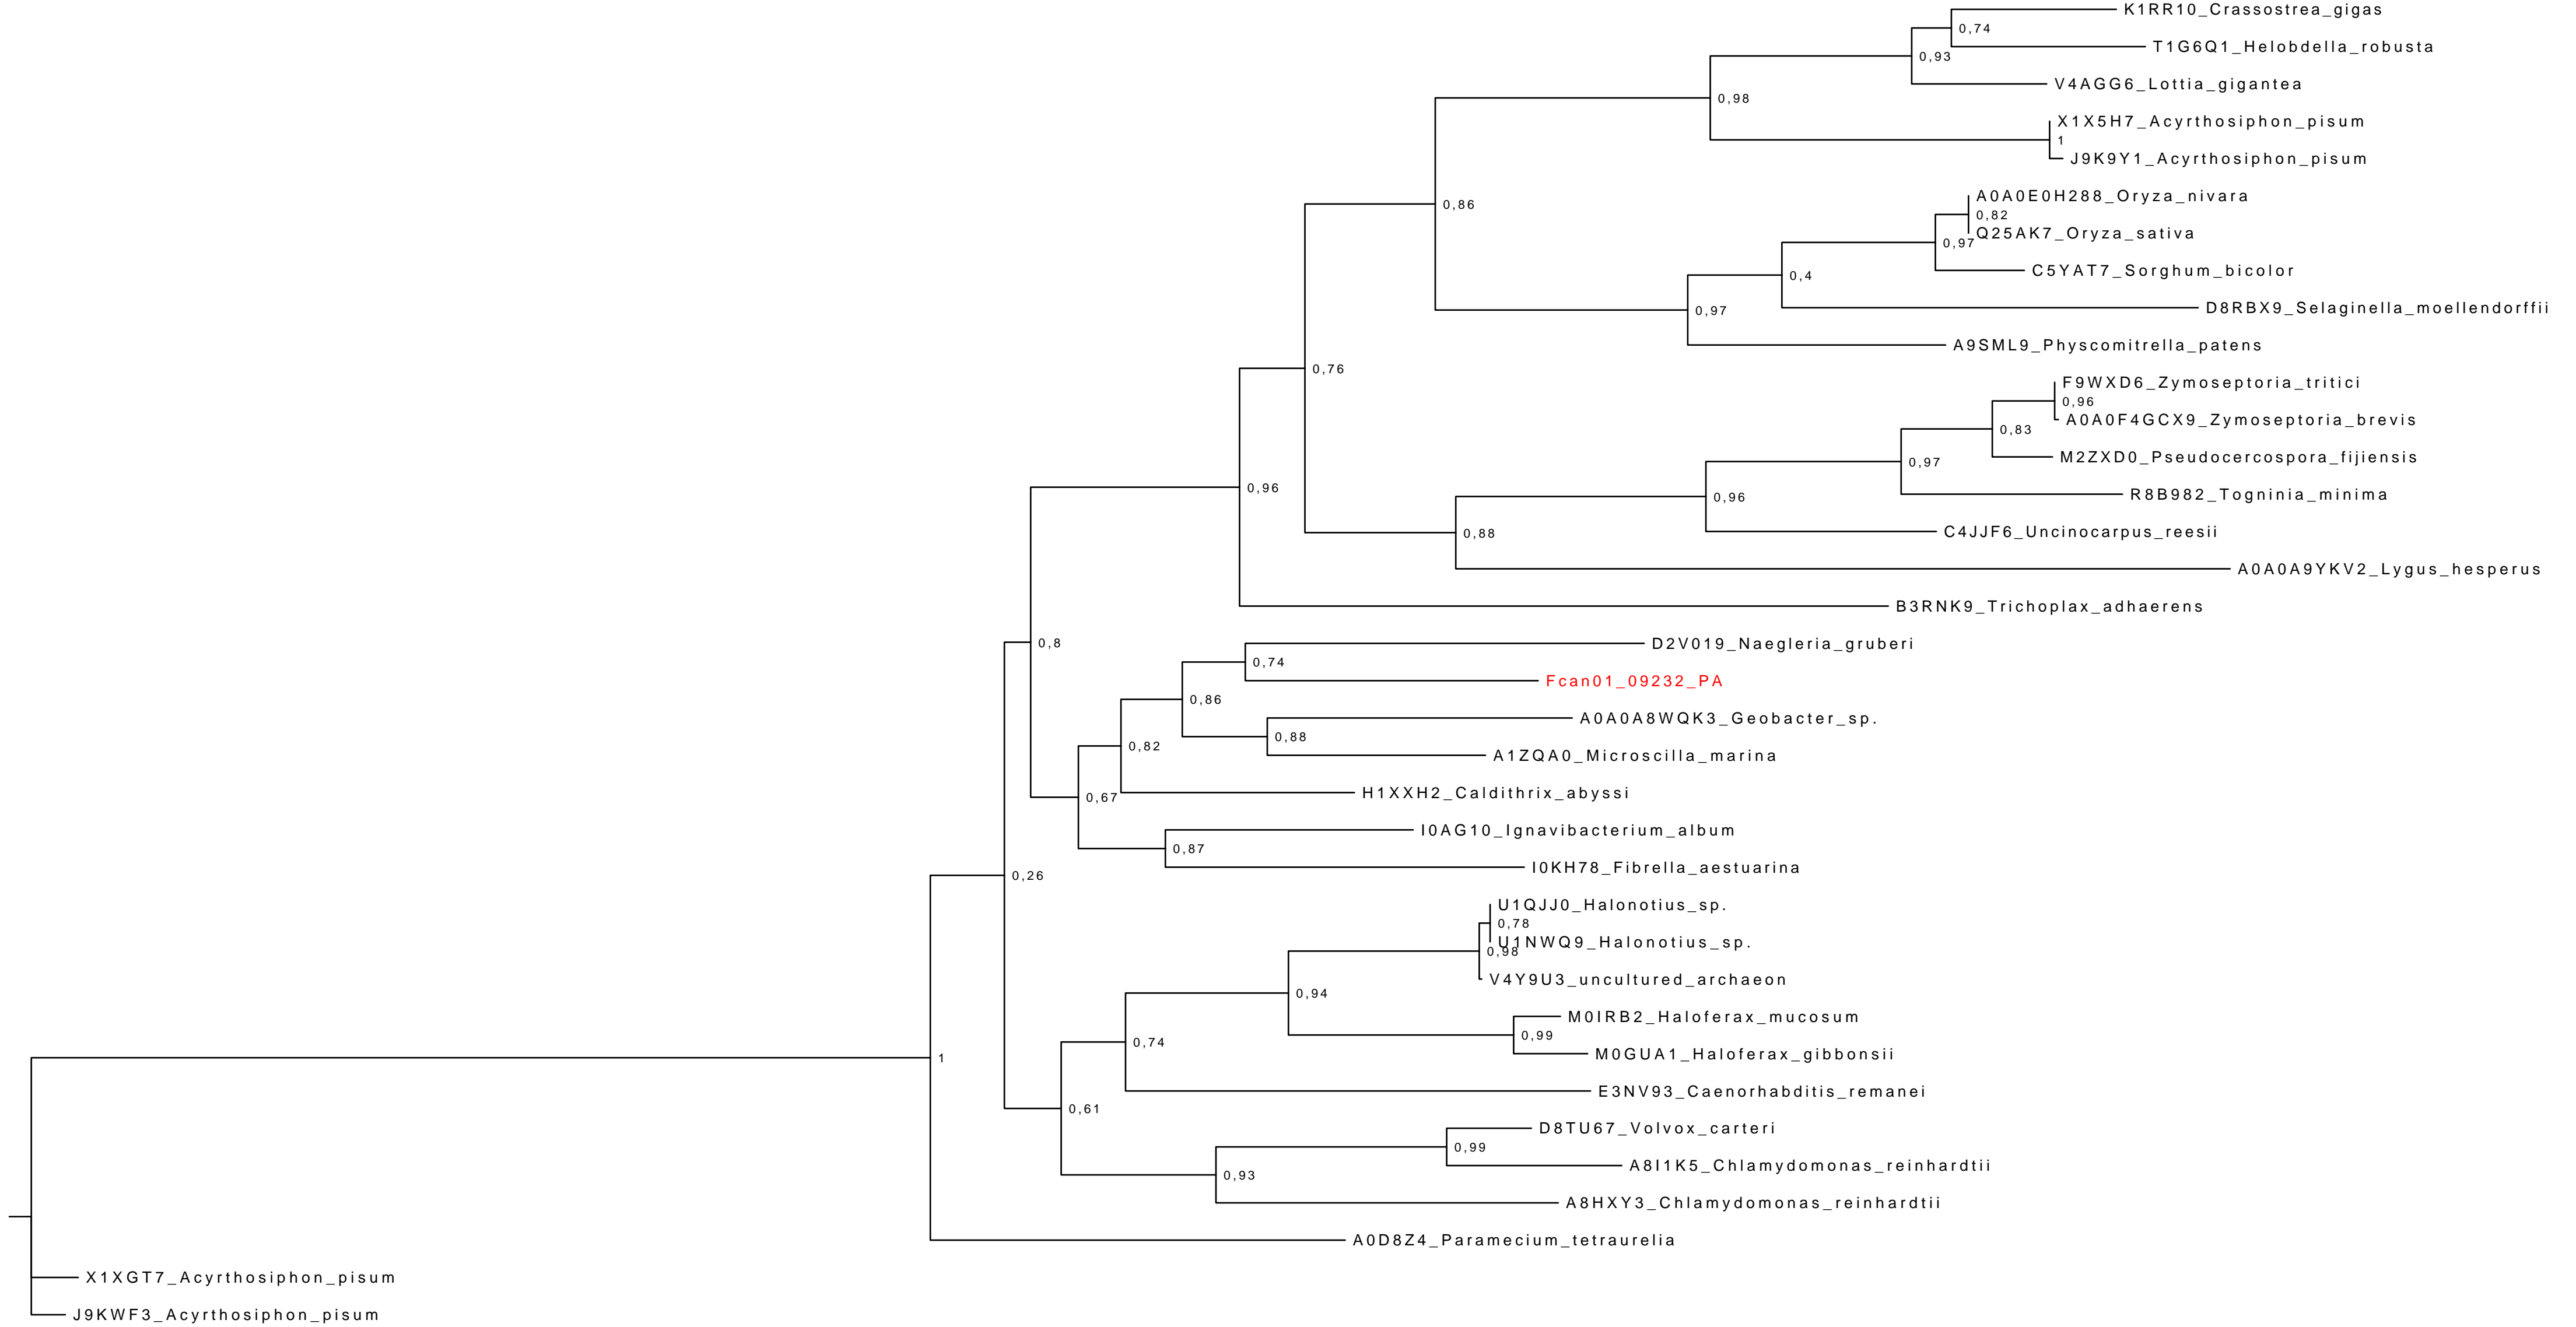

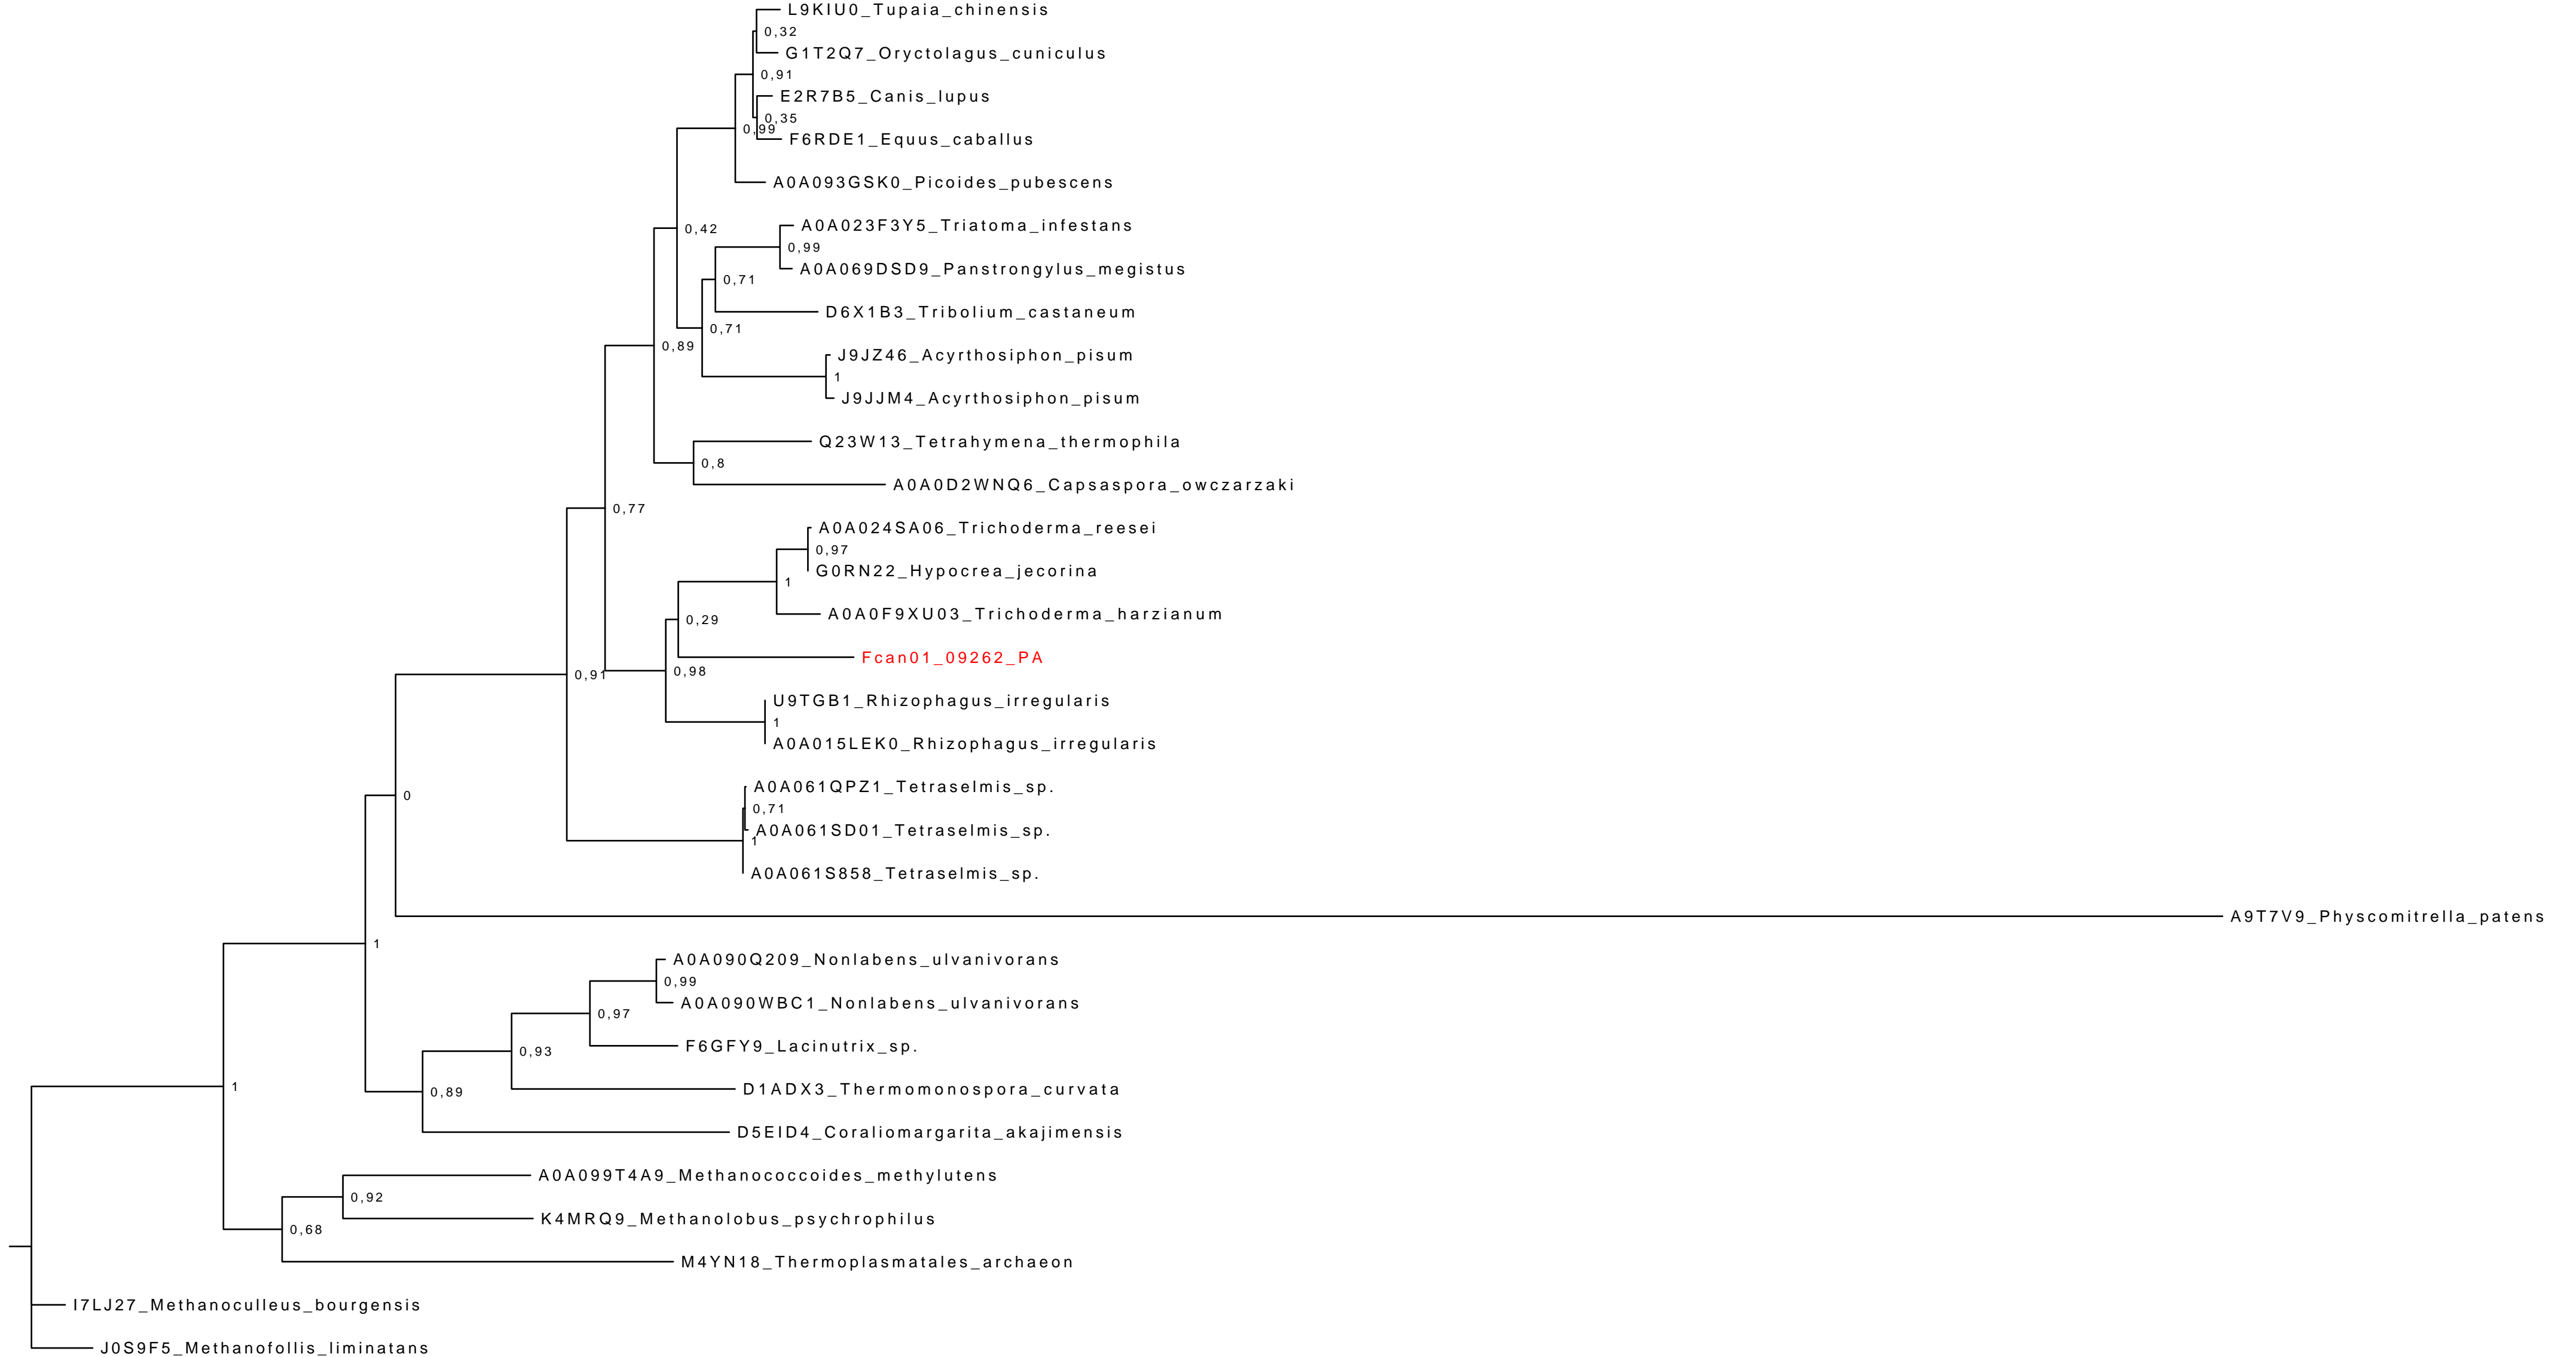

0.8

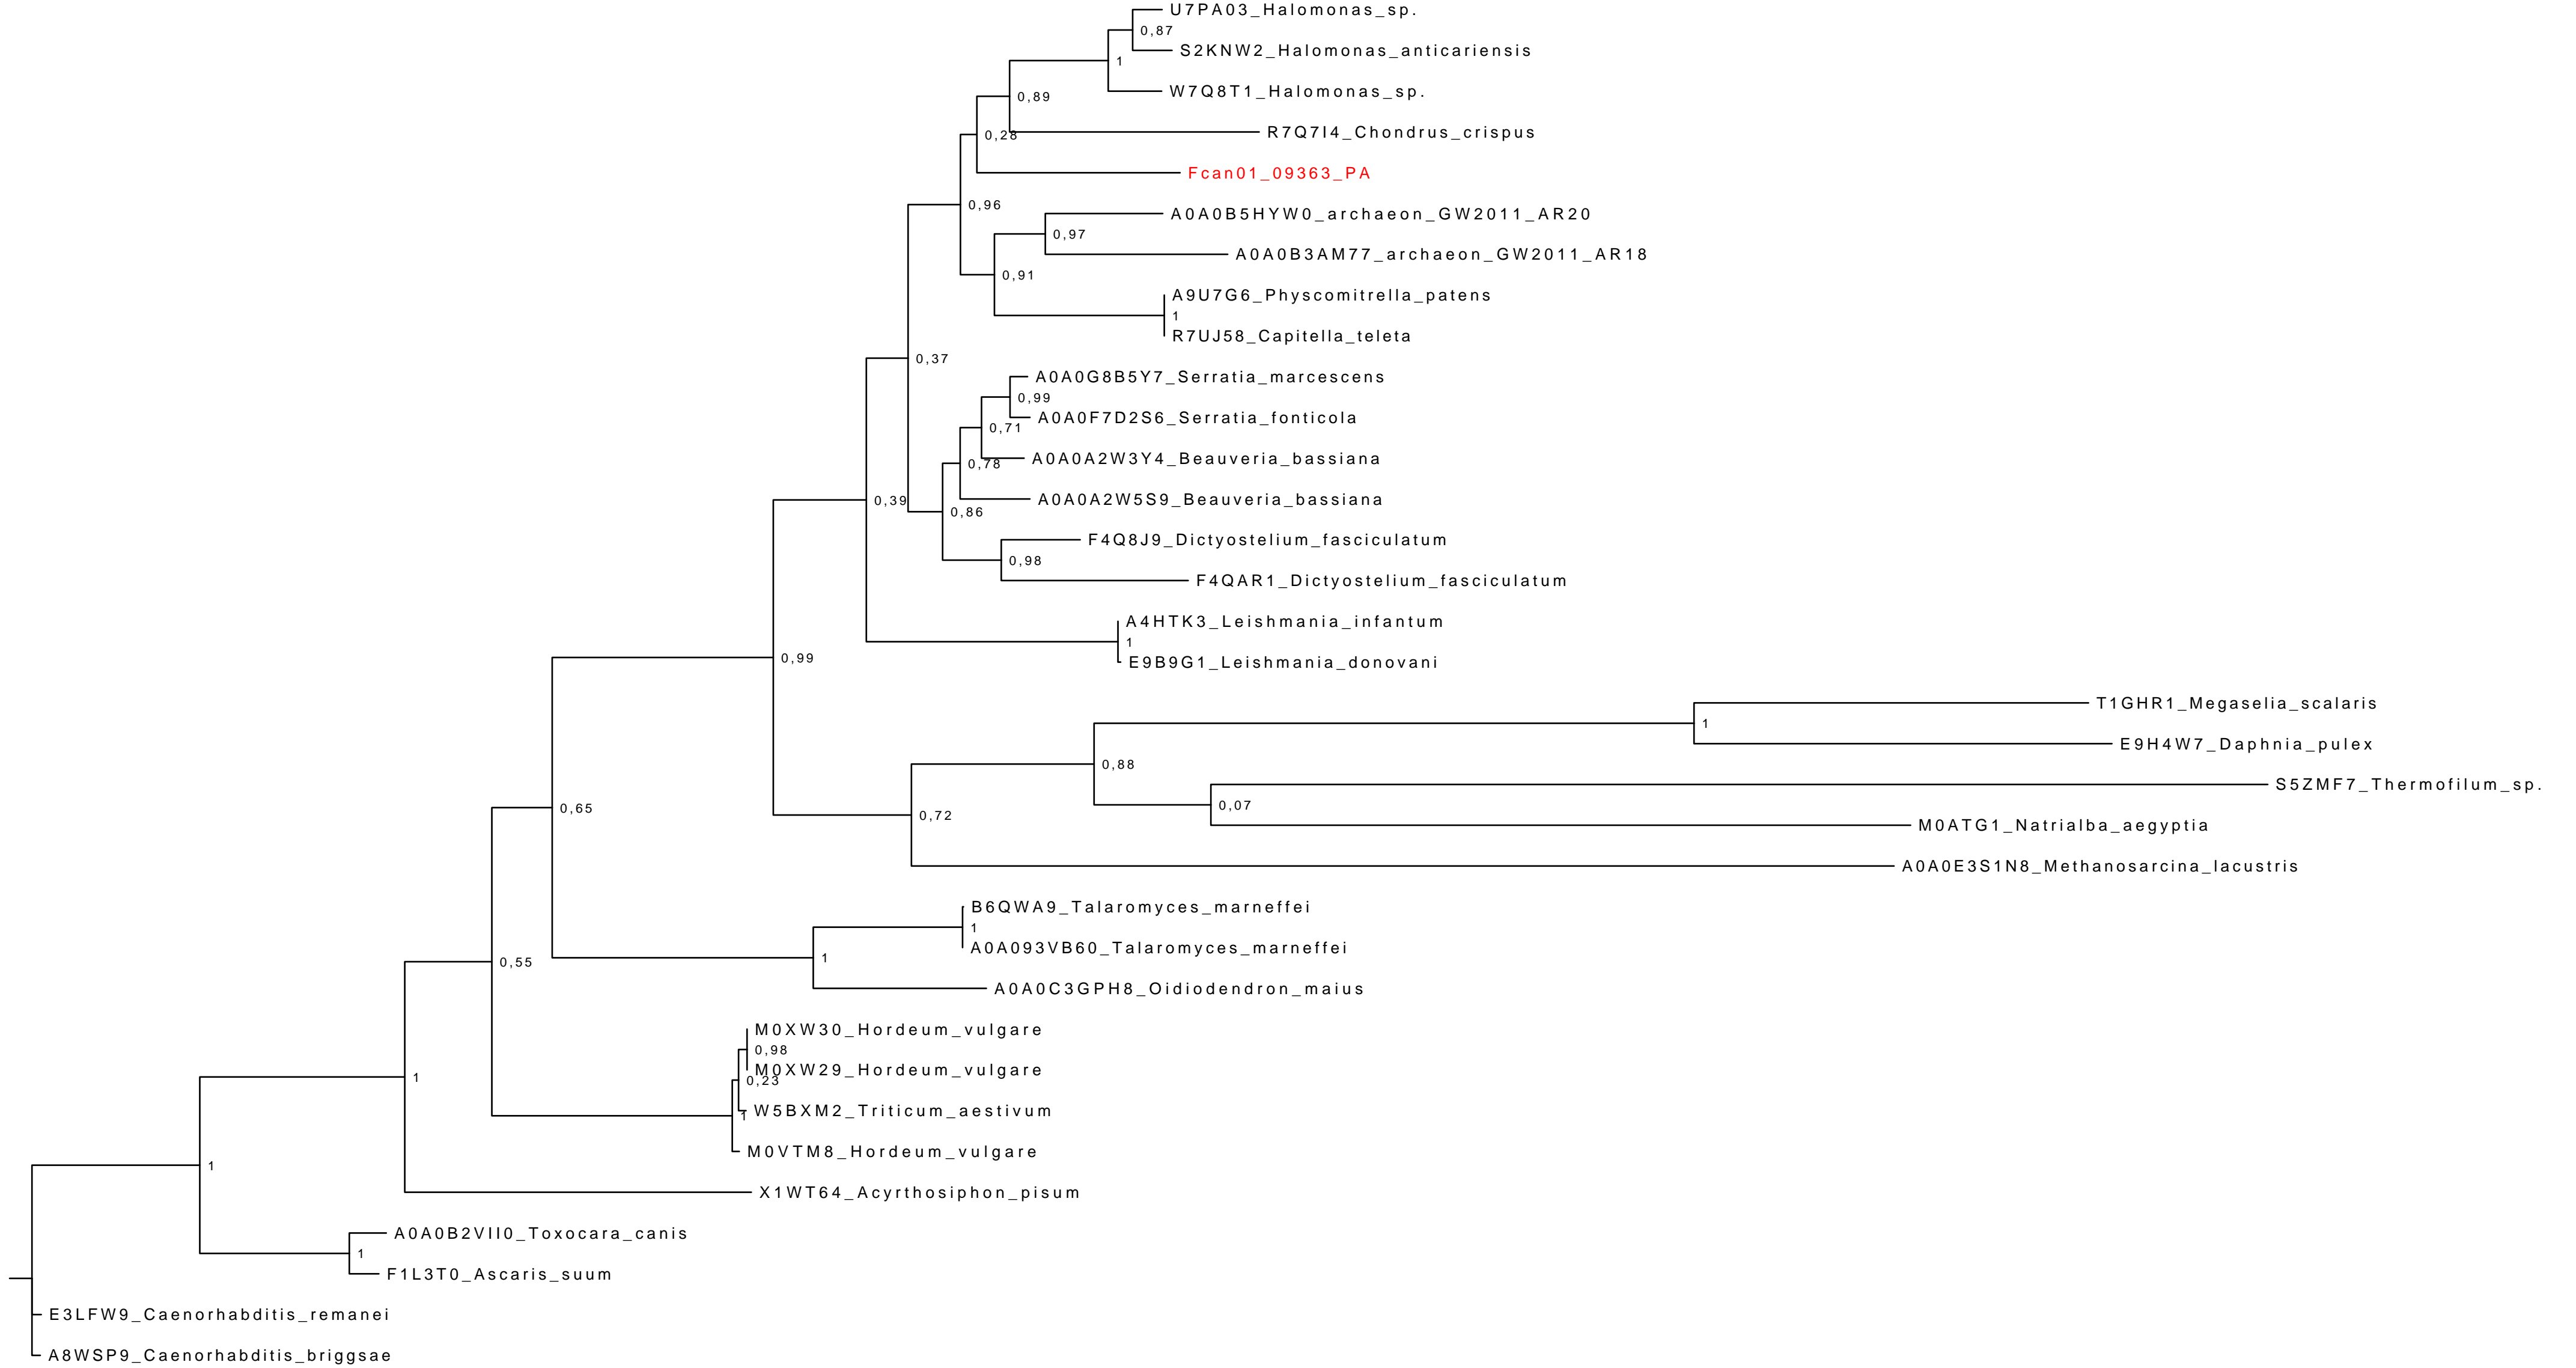

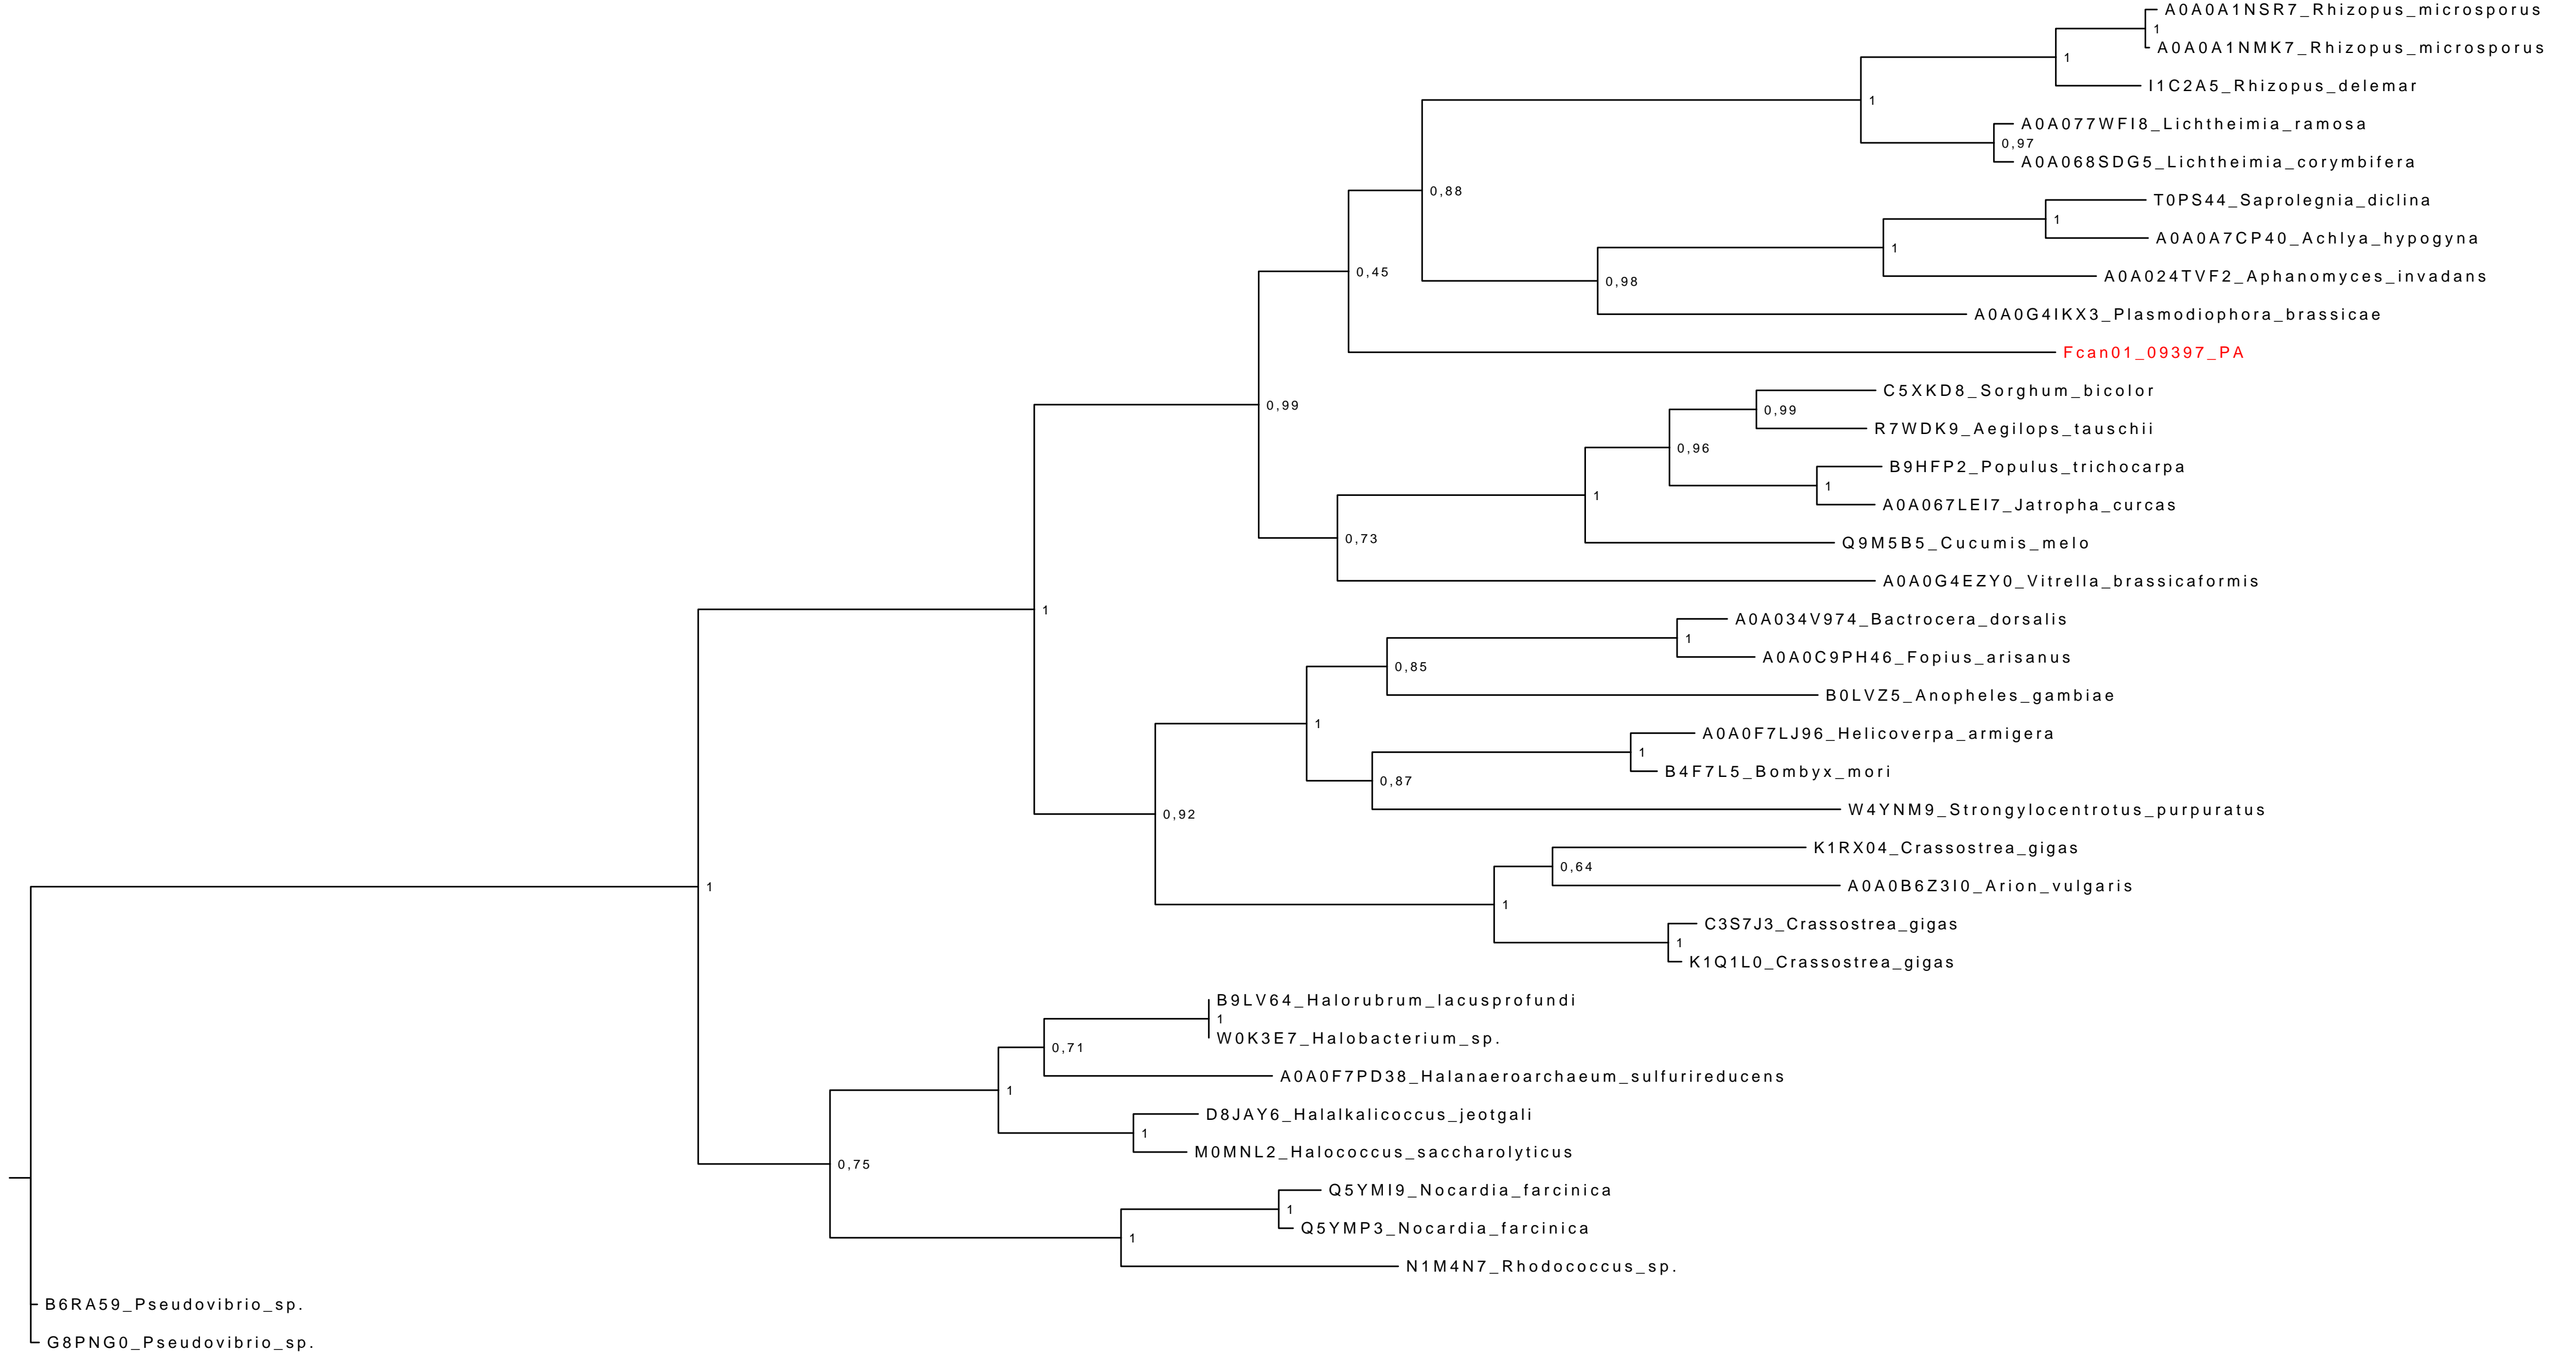

0.4

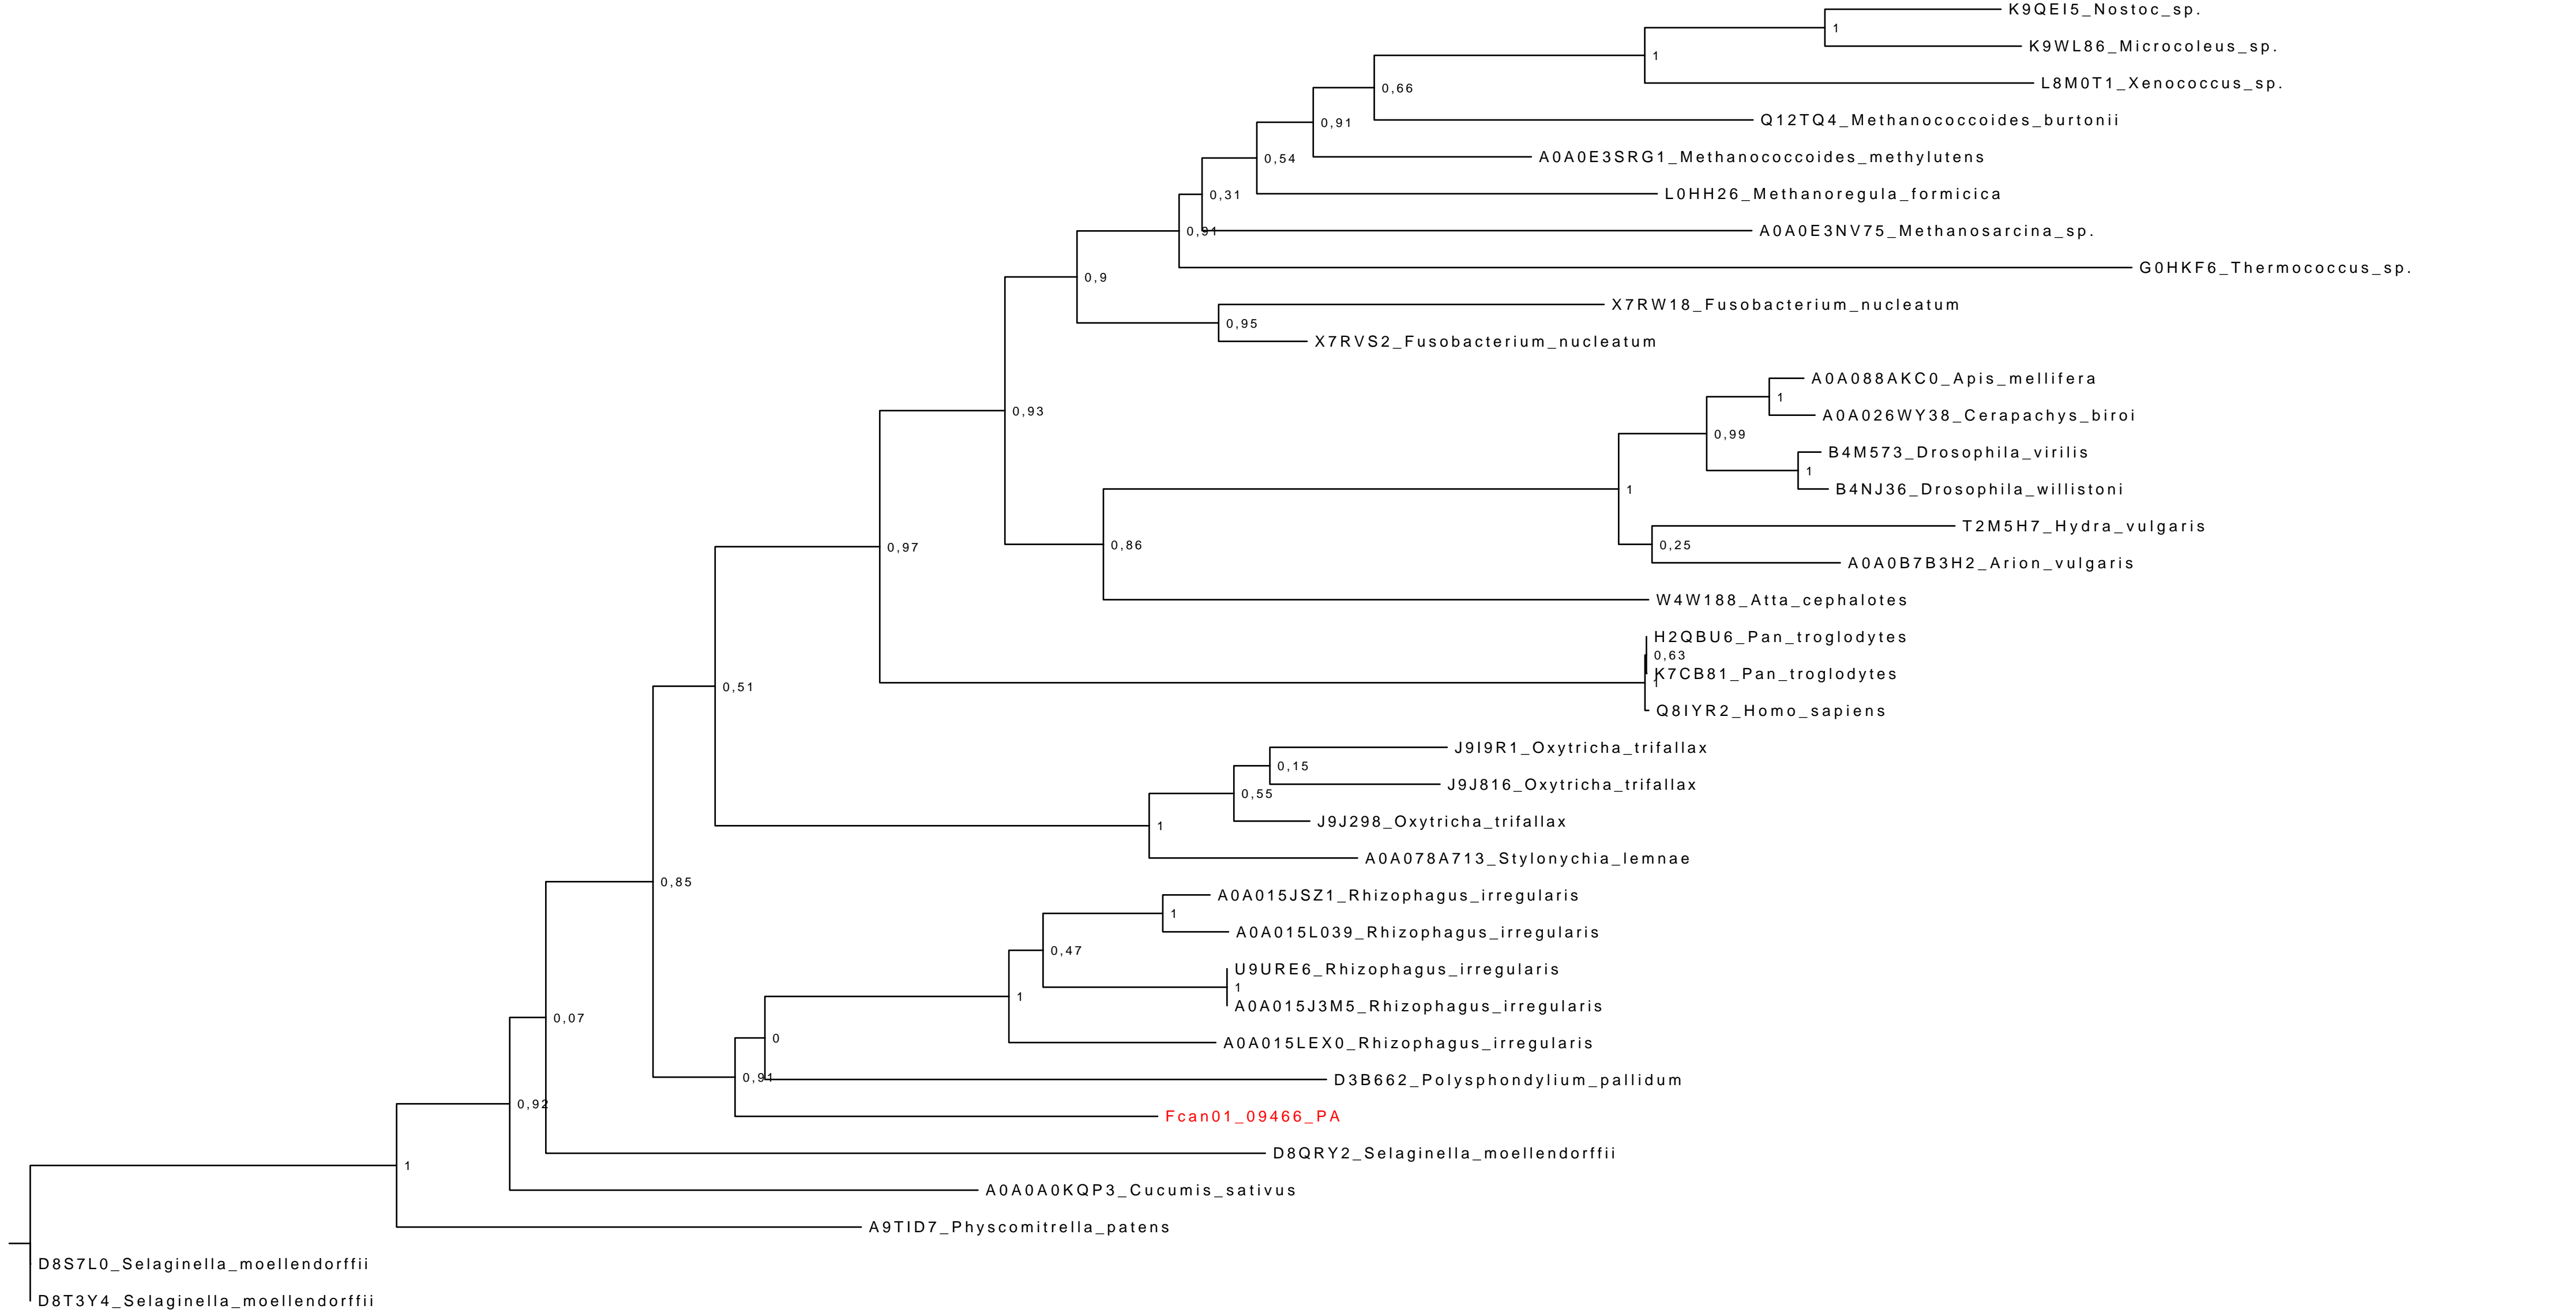

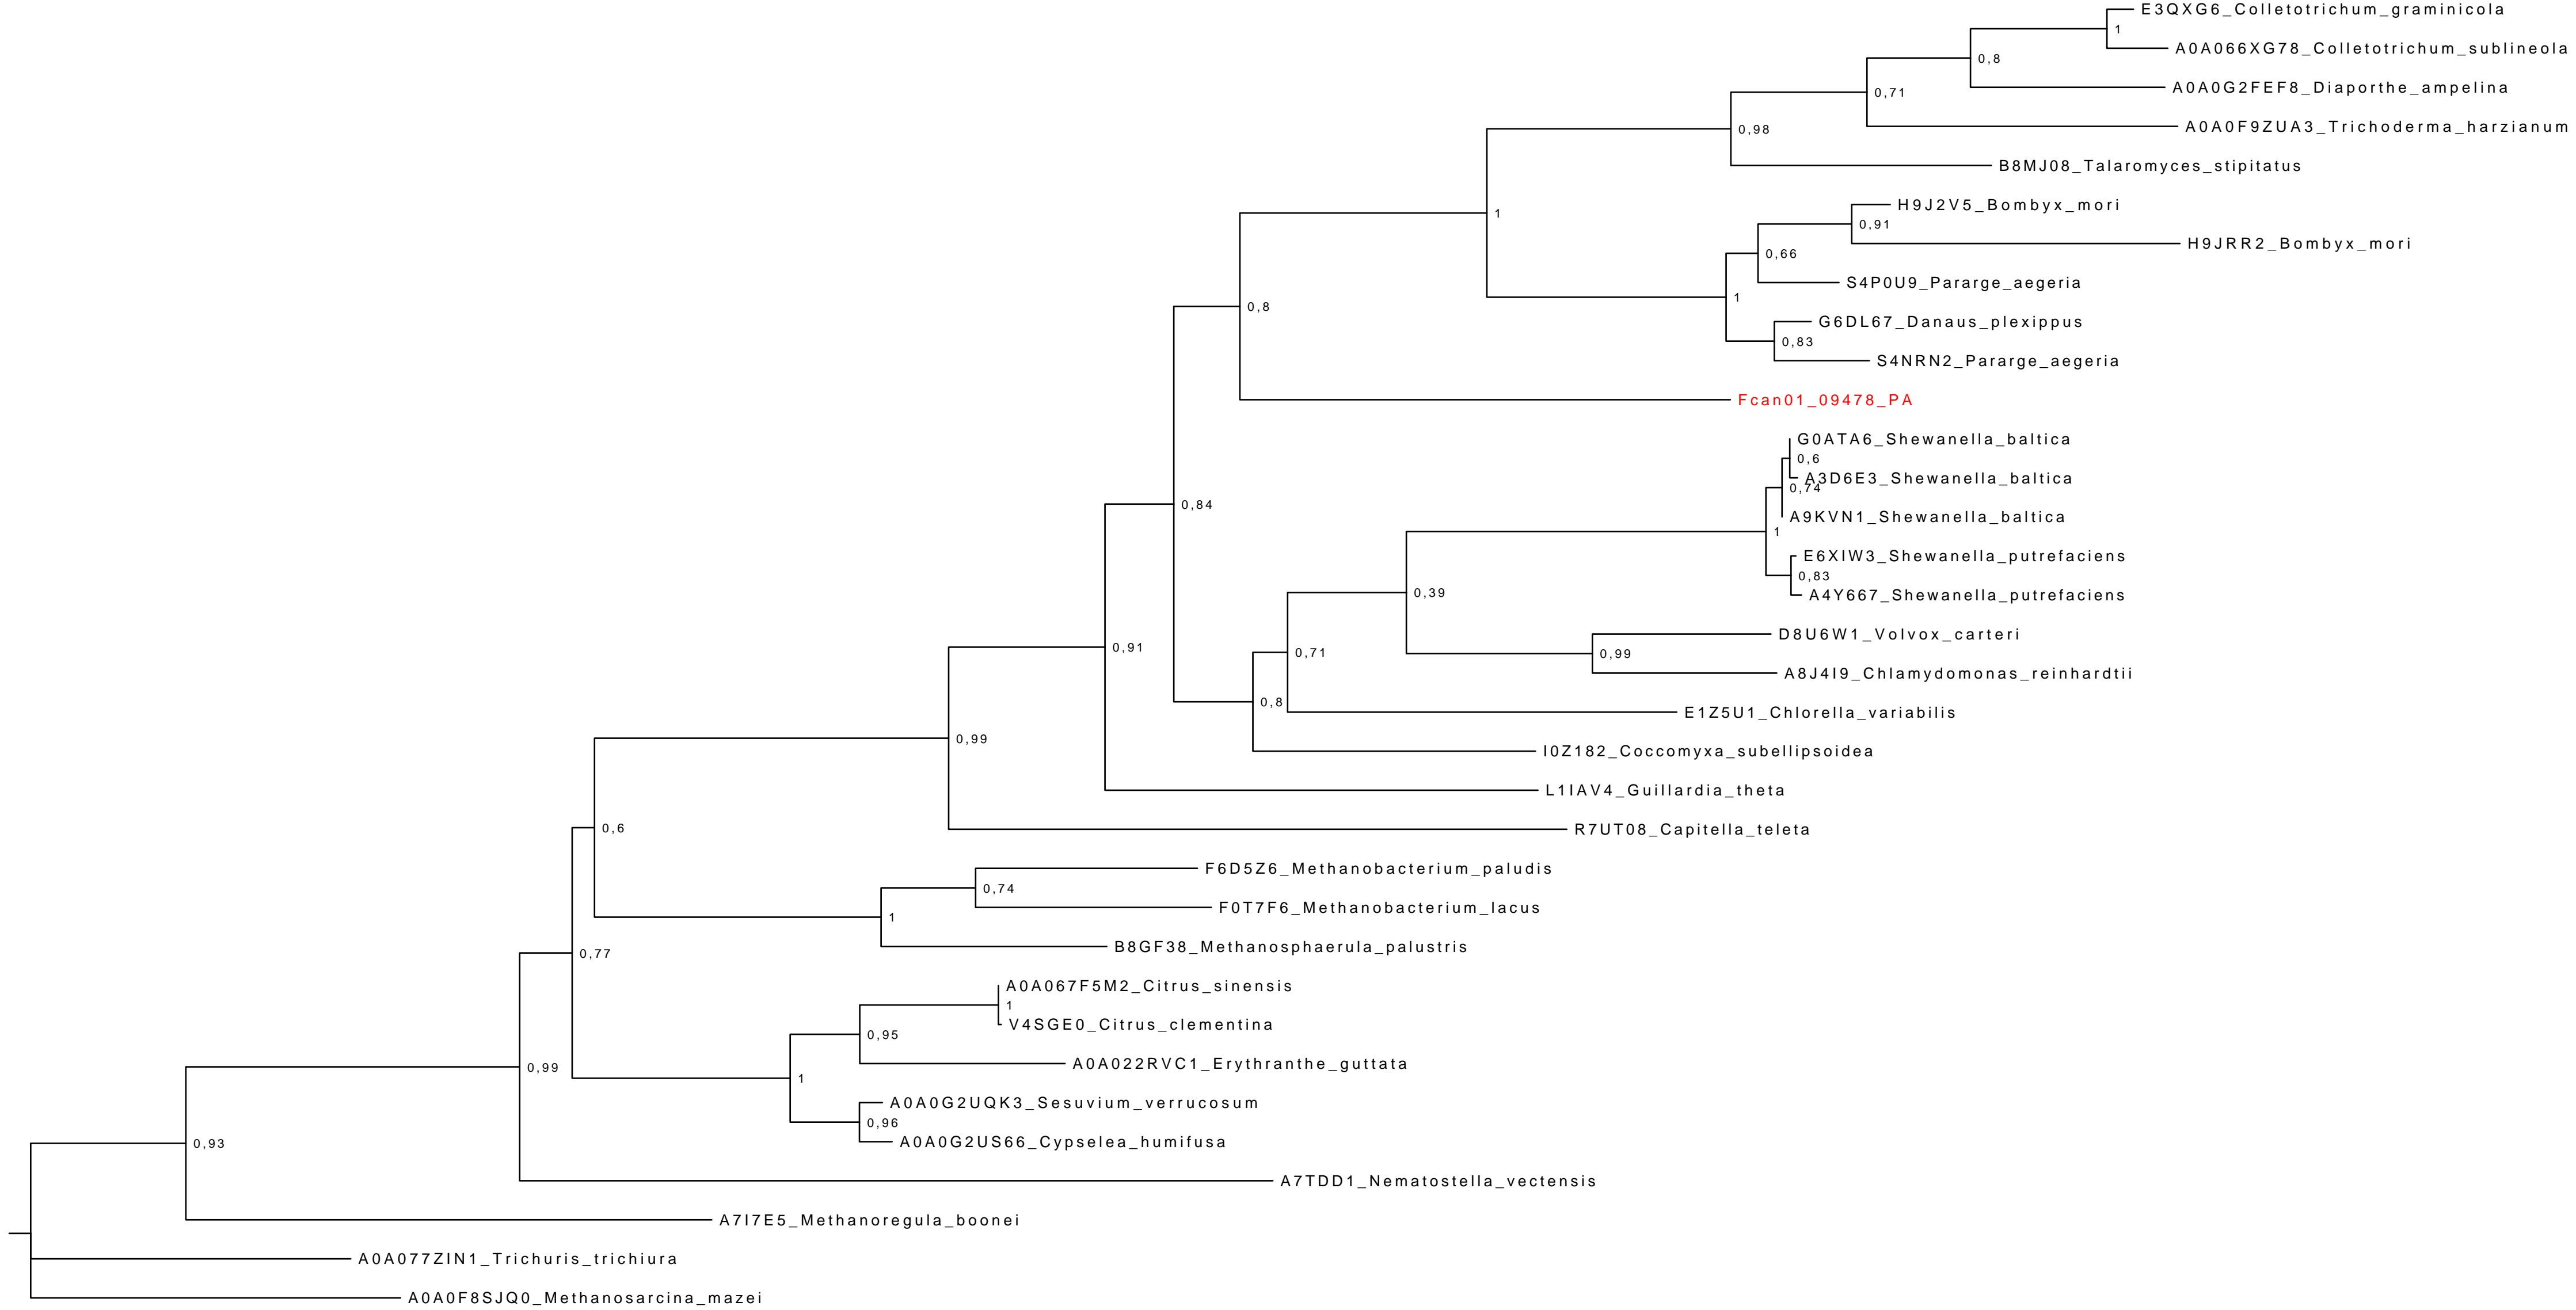

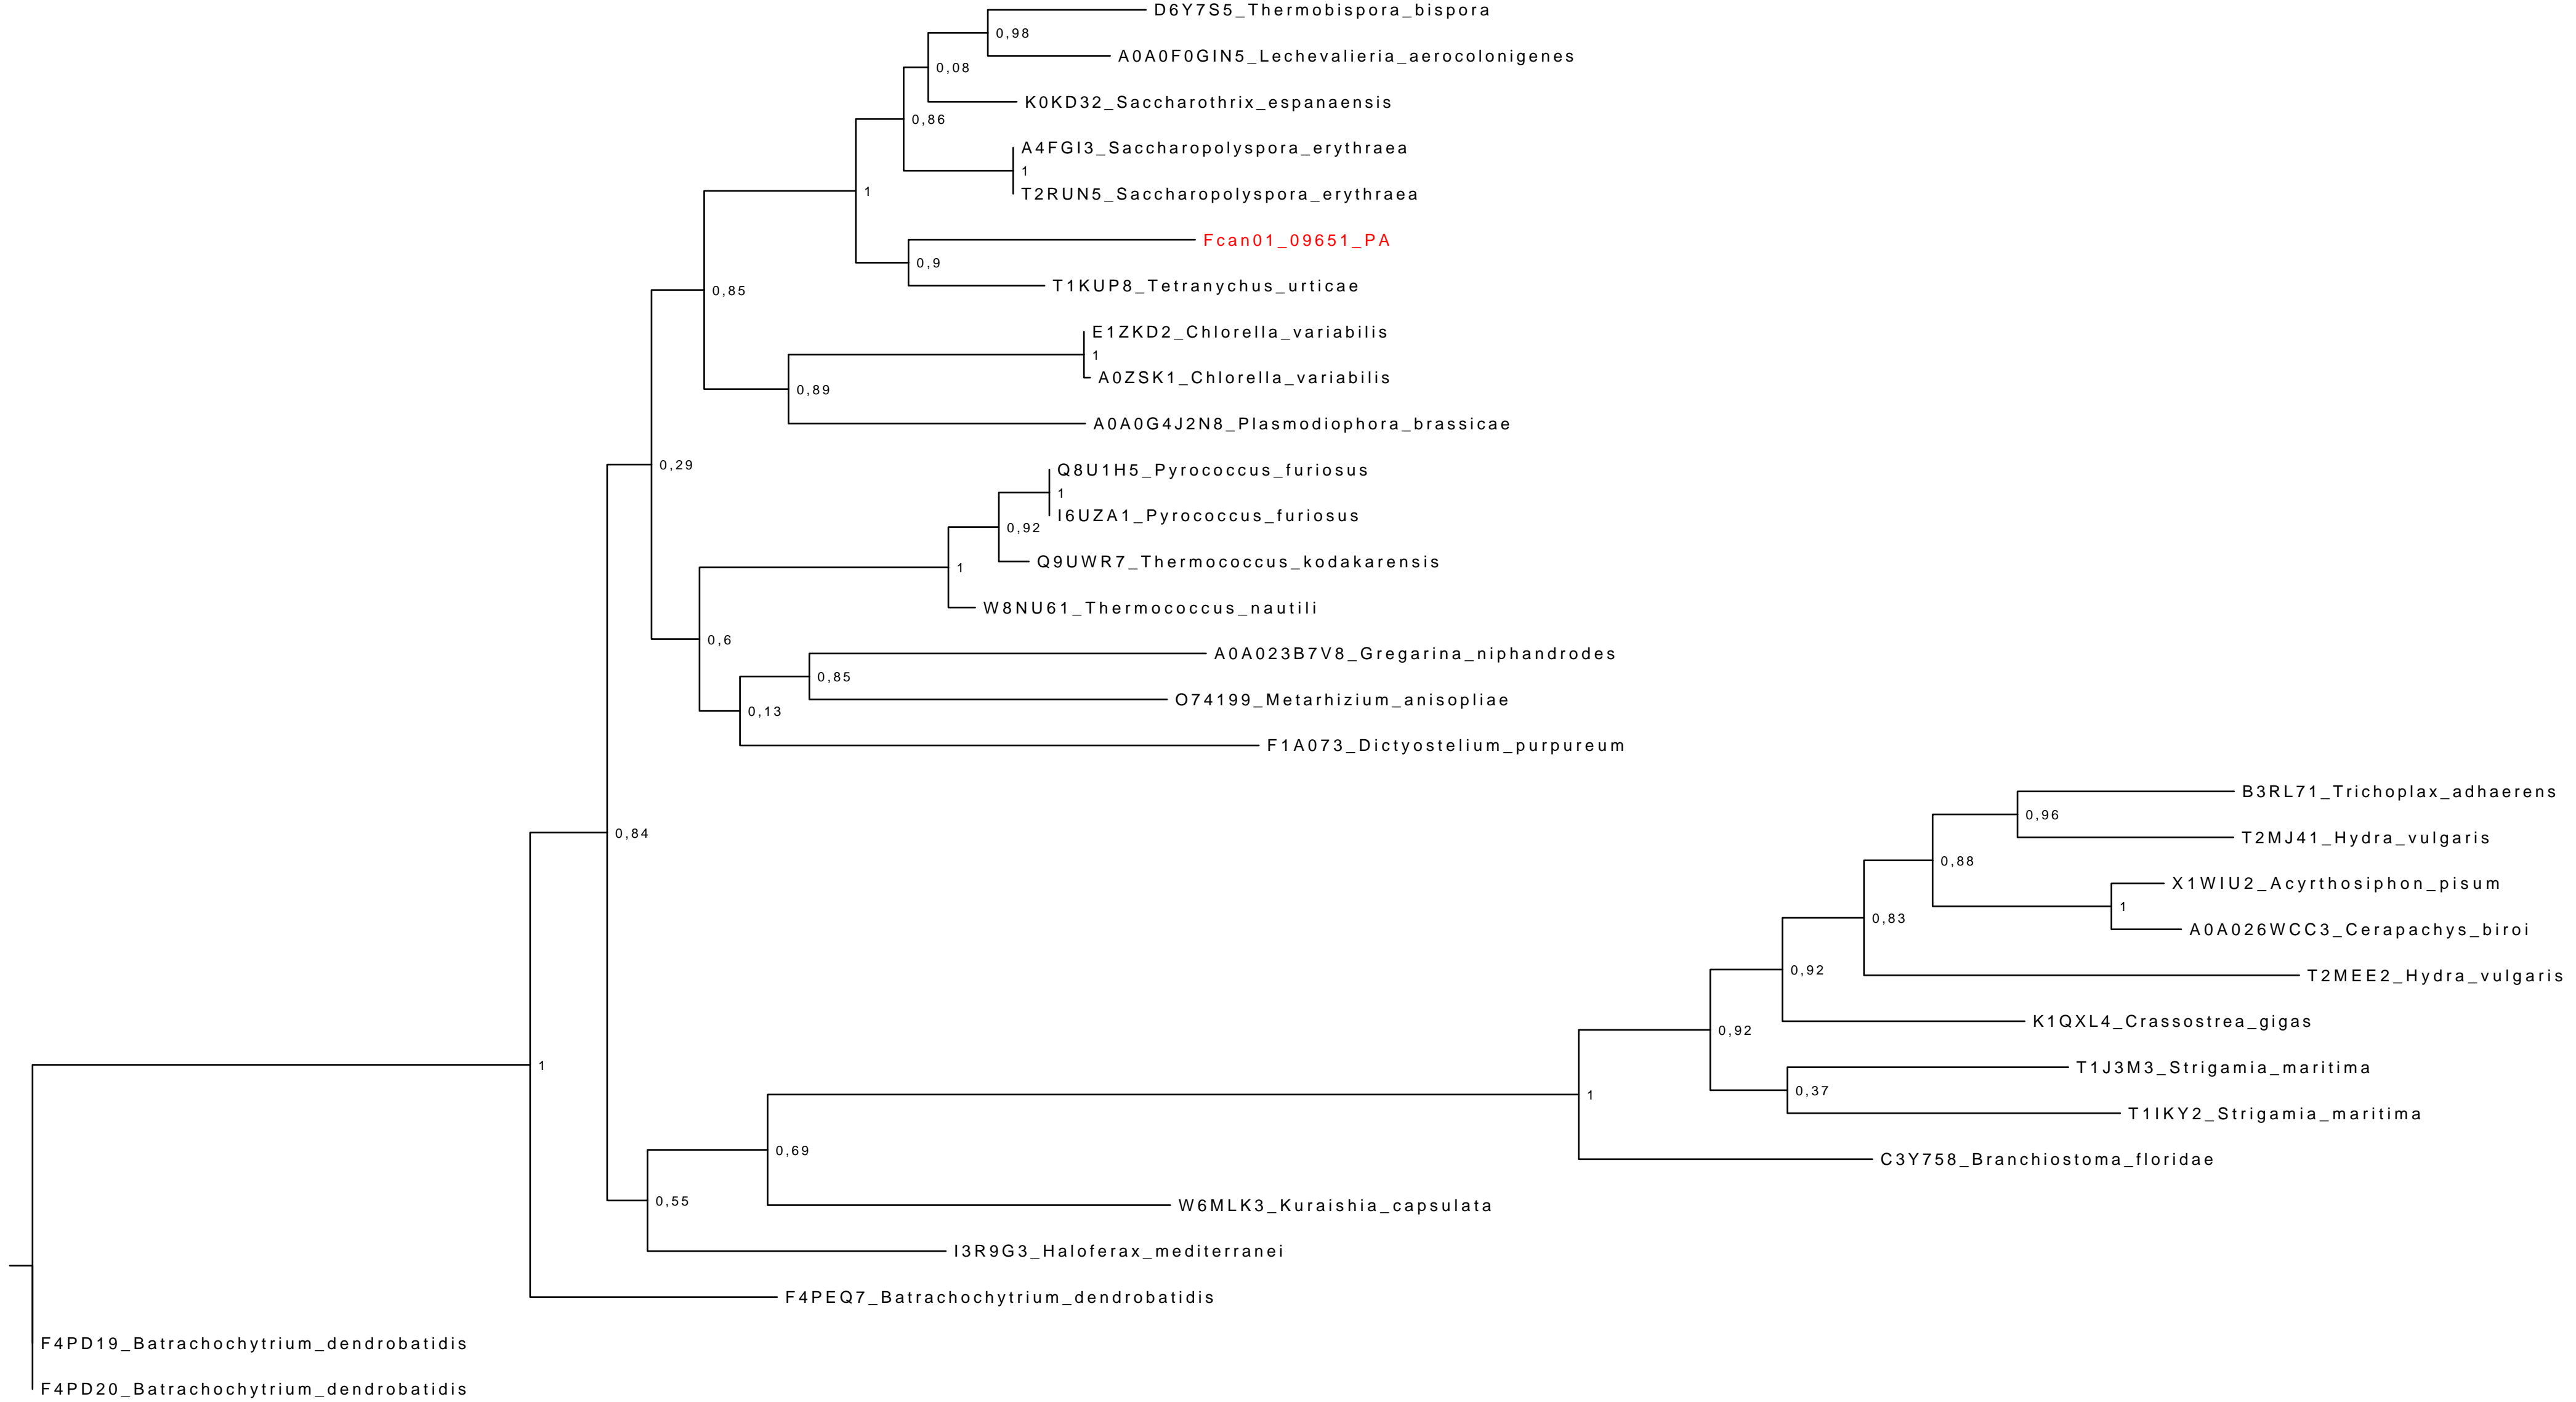

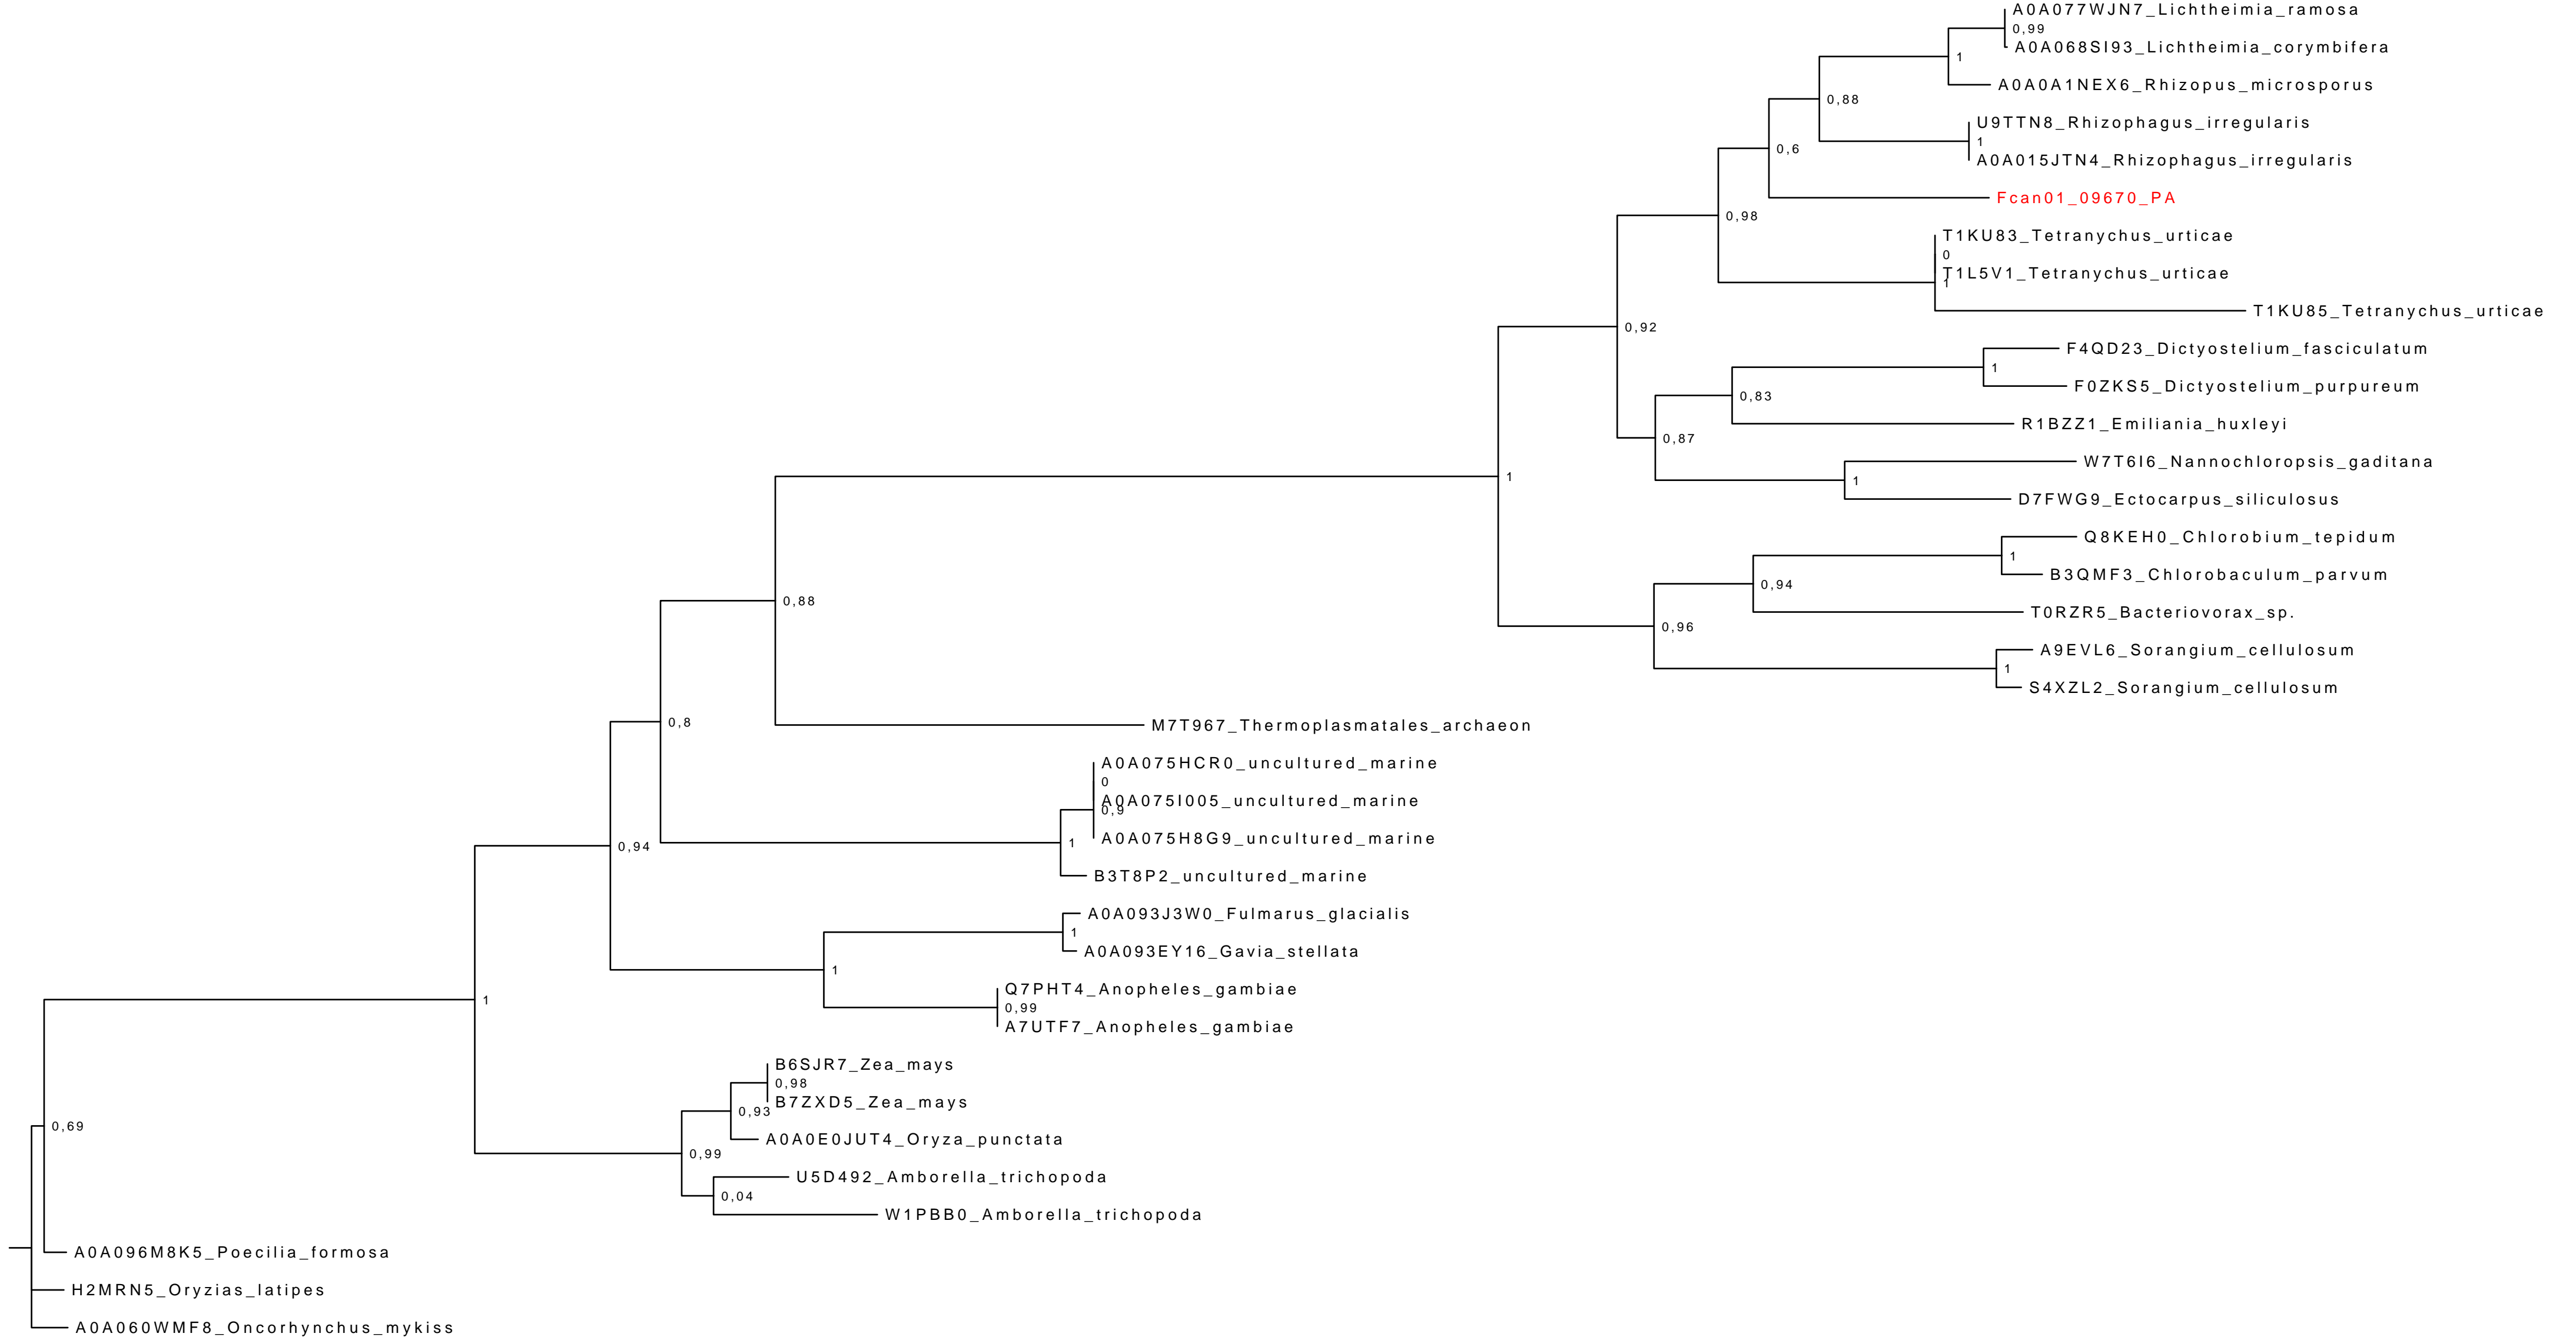

0.4



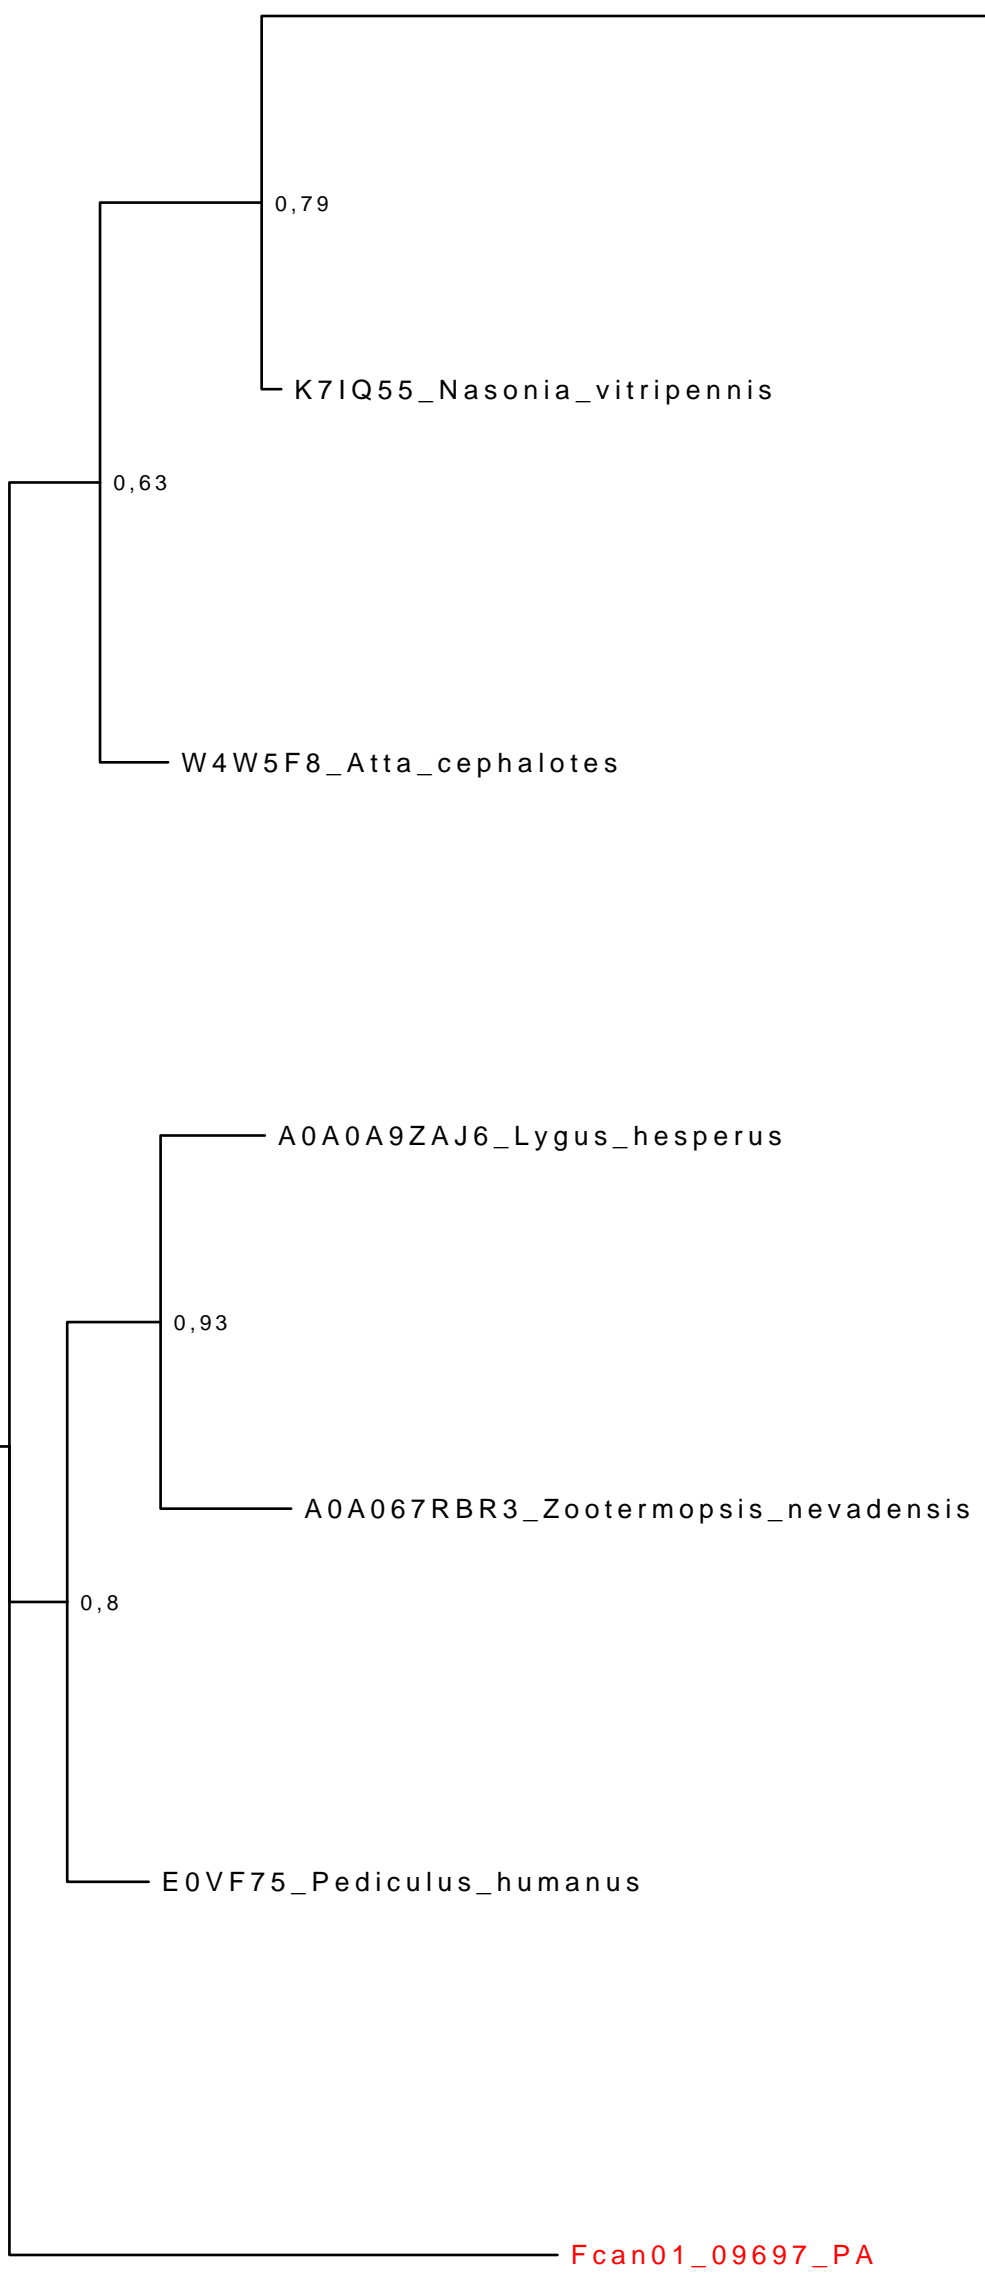

0.2

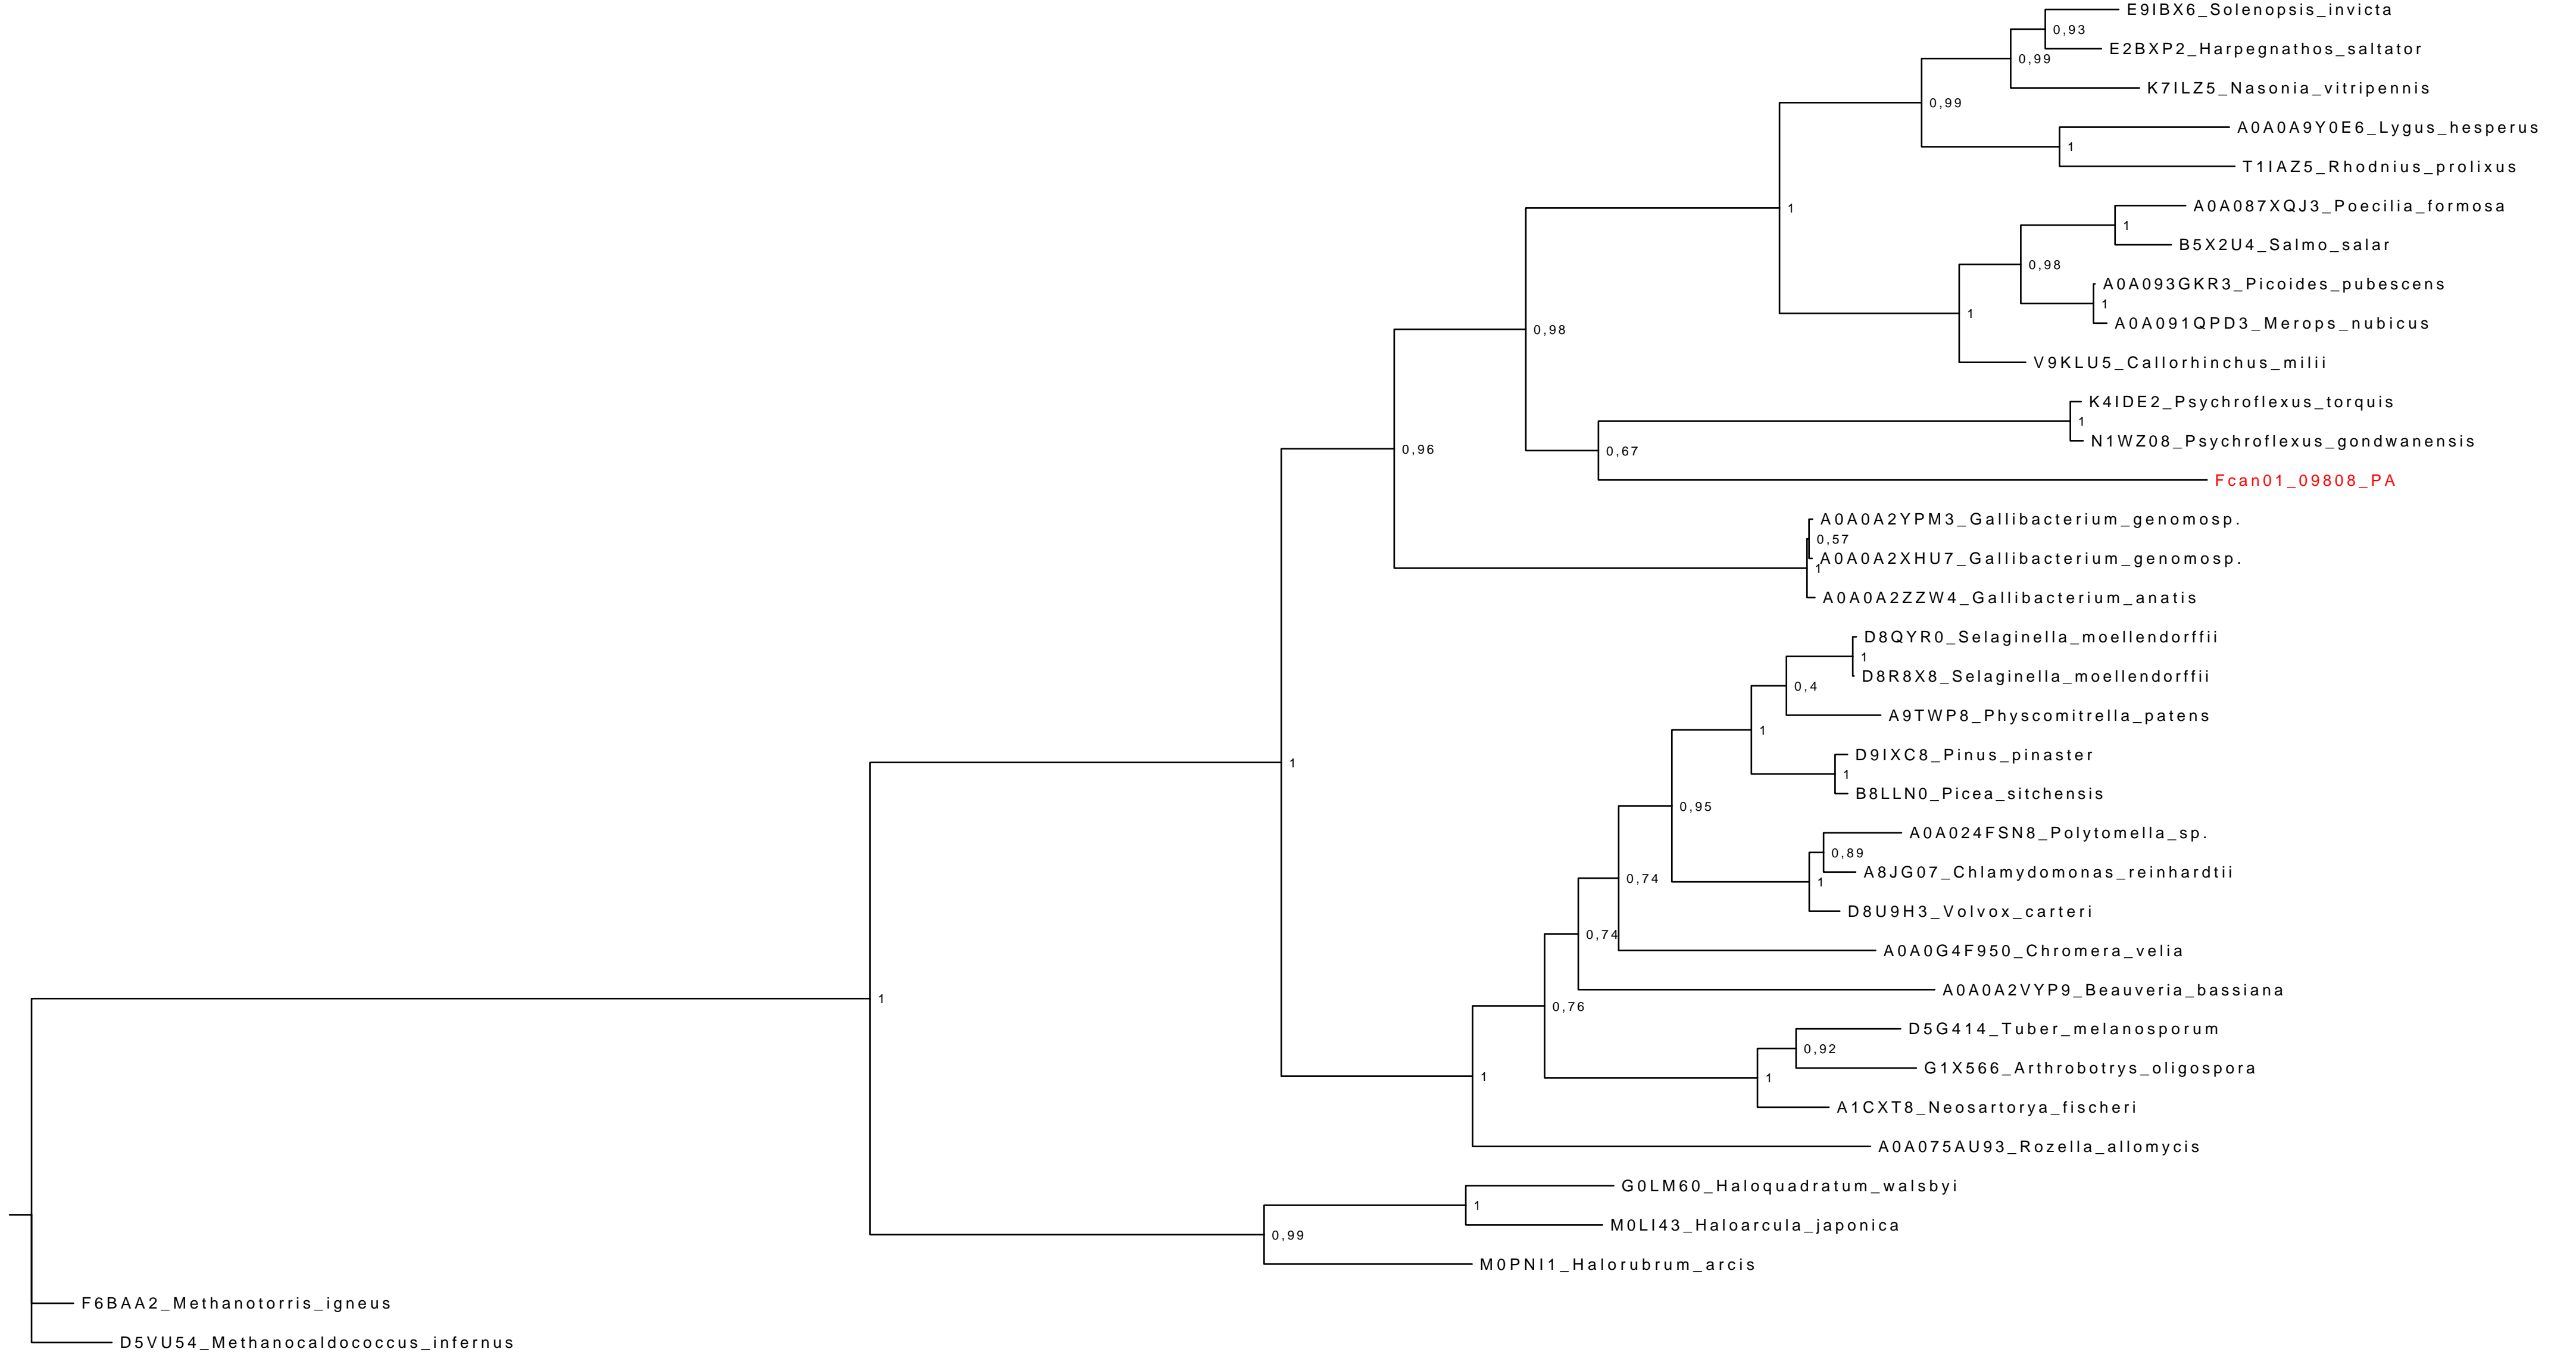

0.4



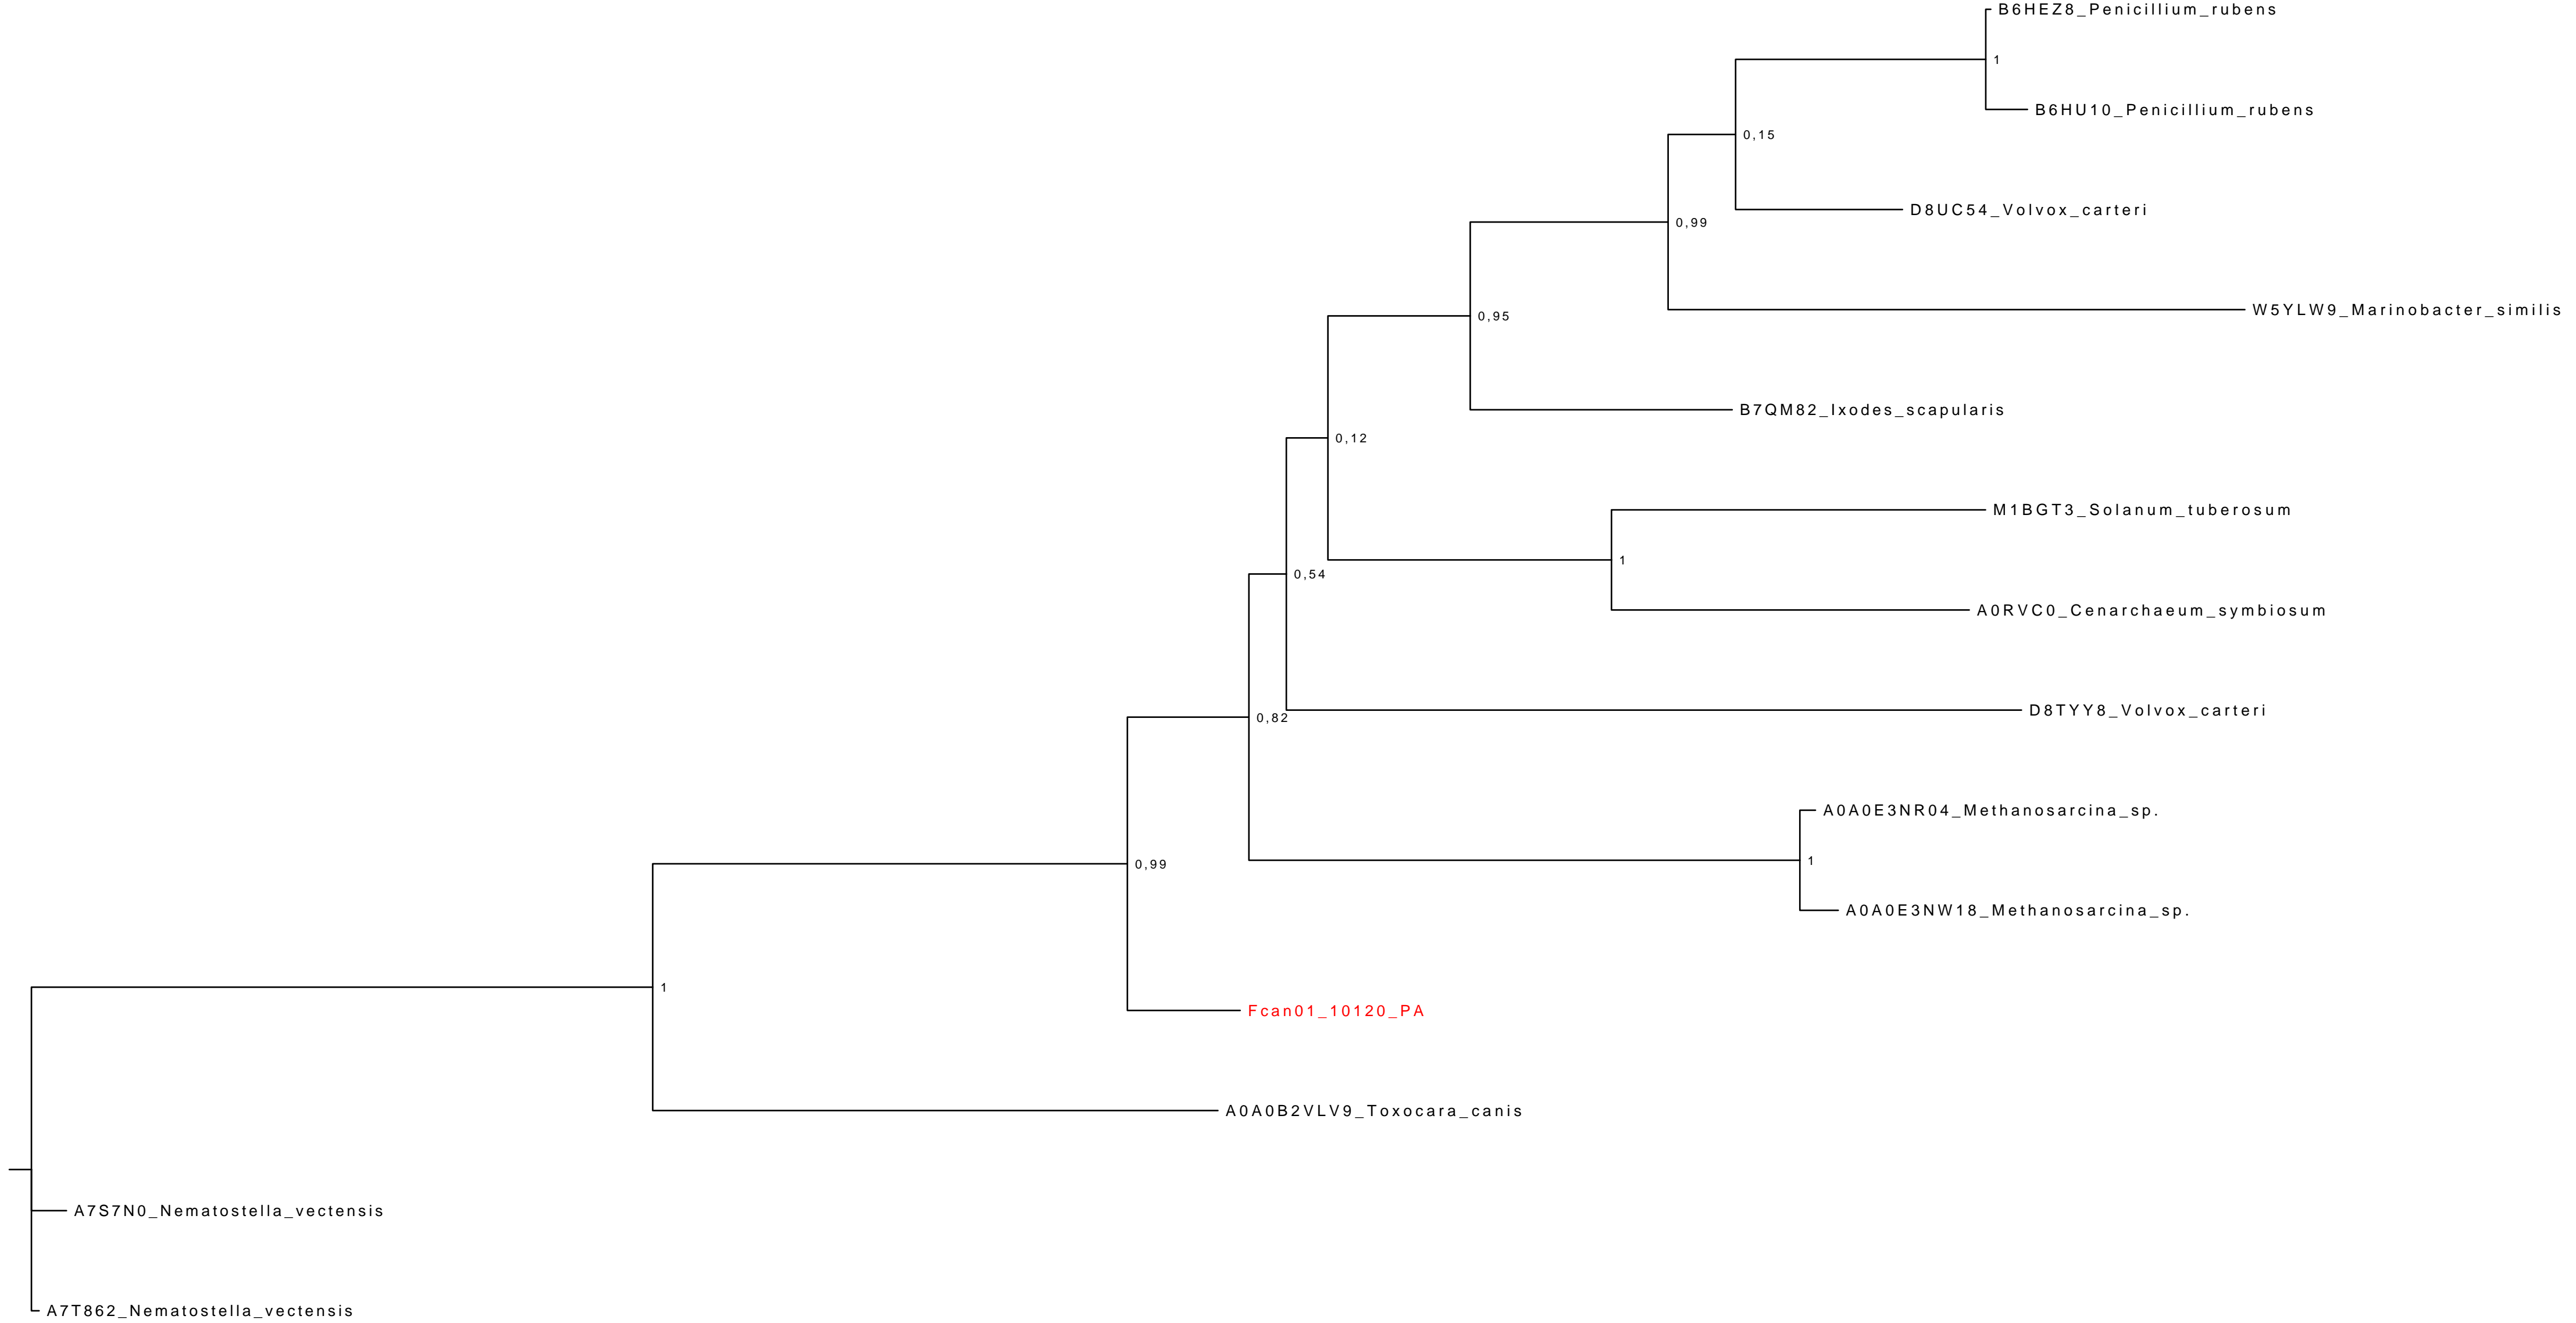

0.5

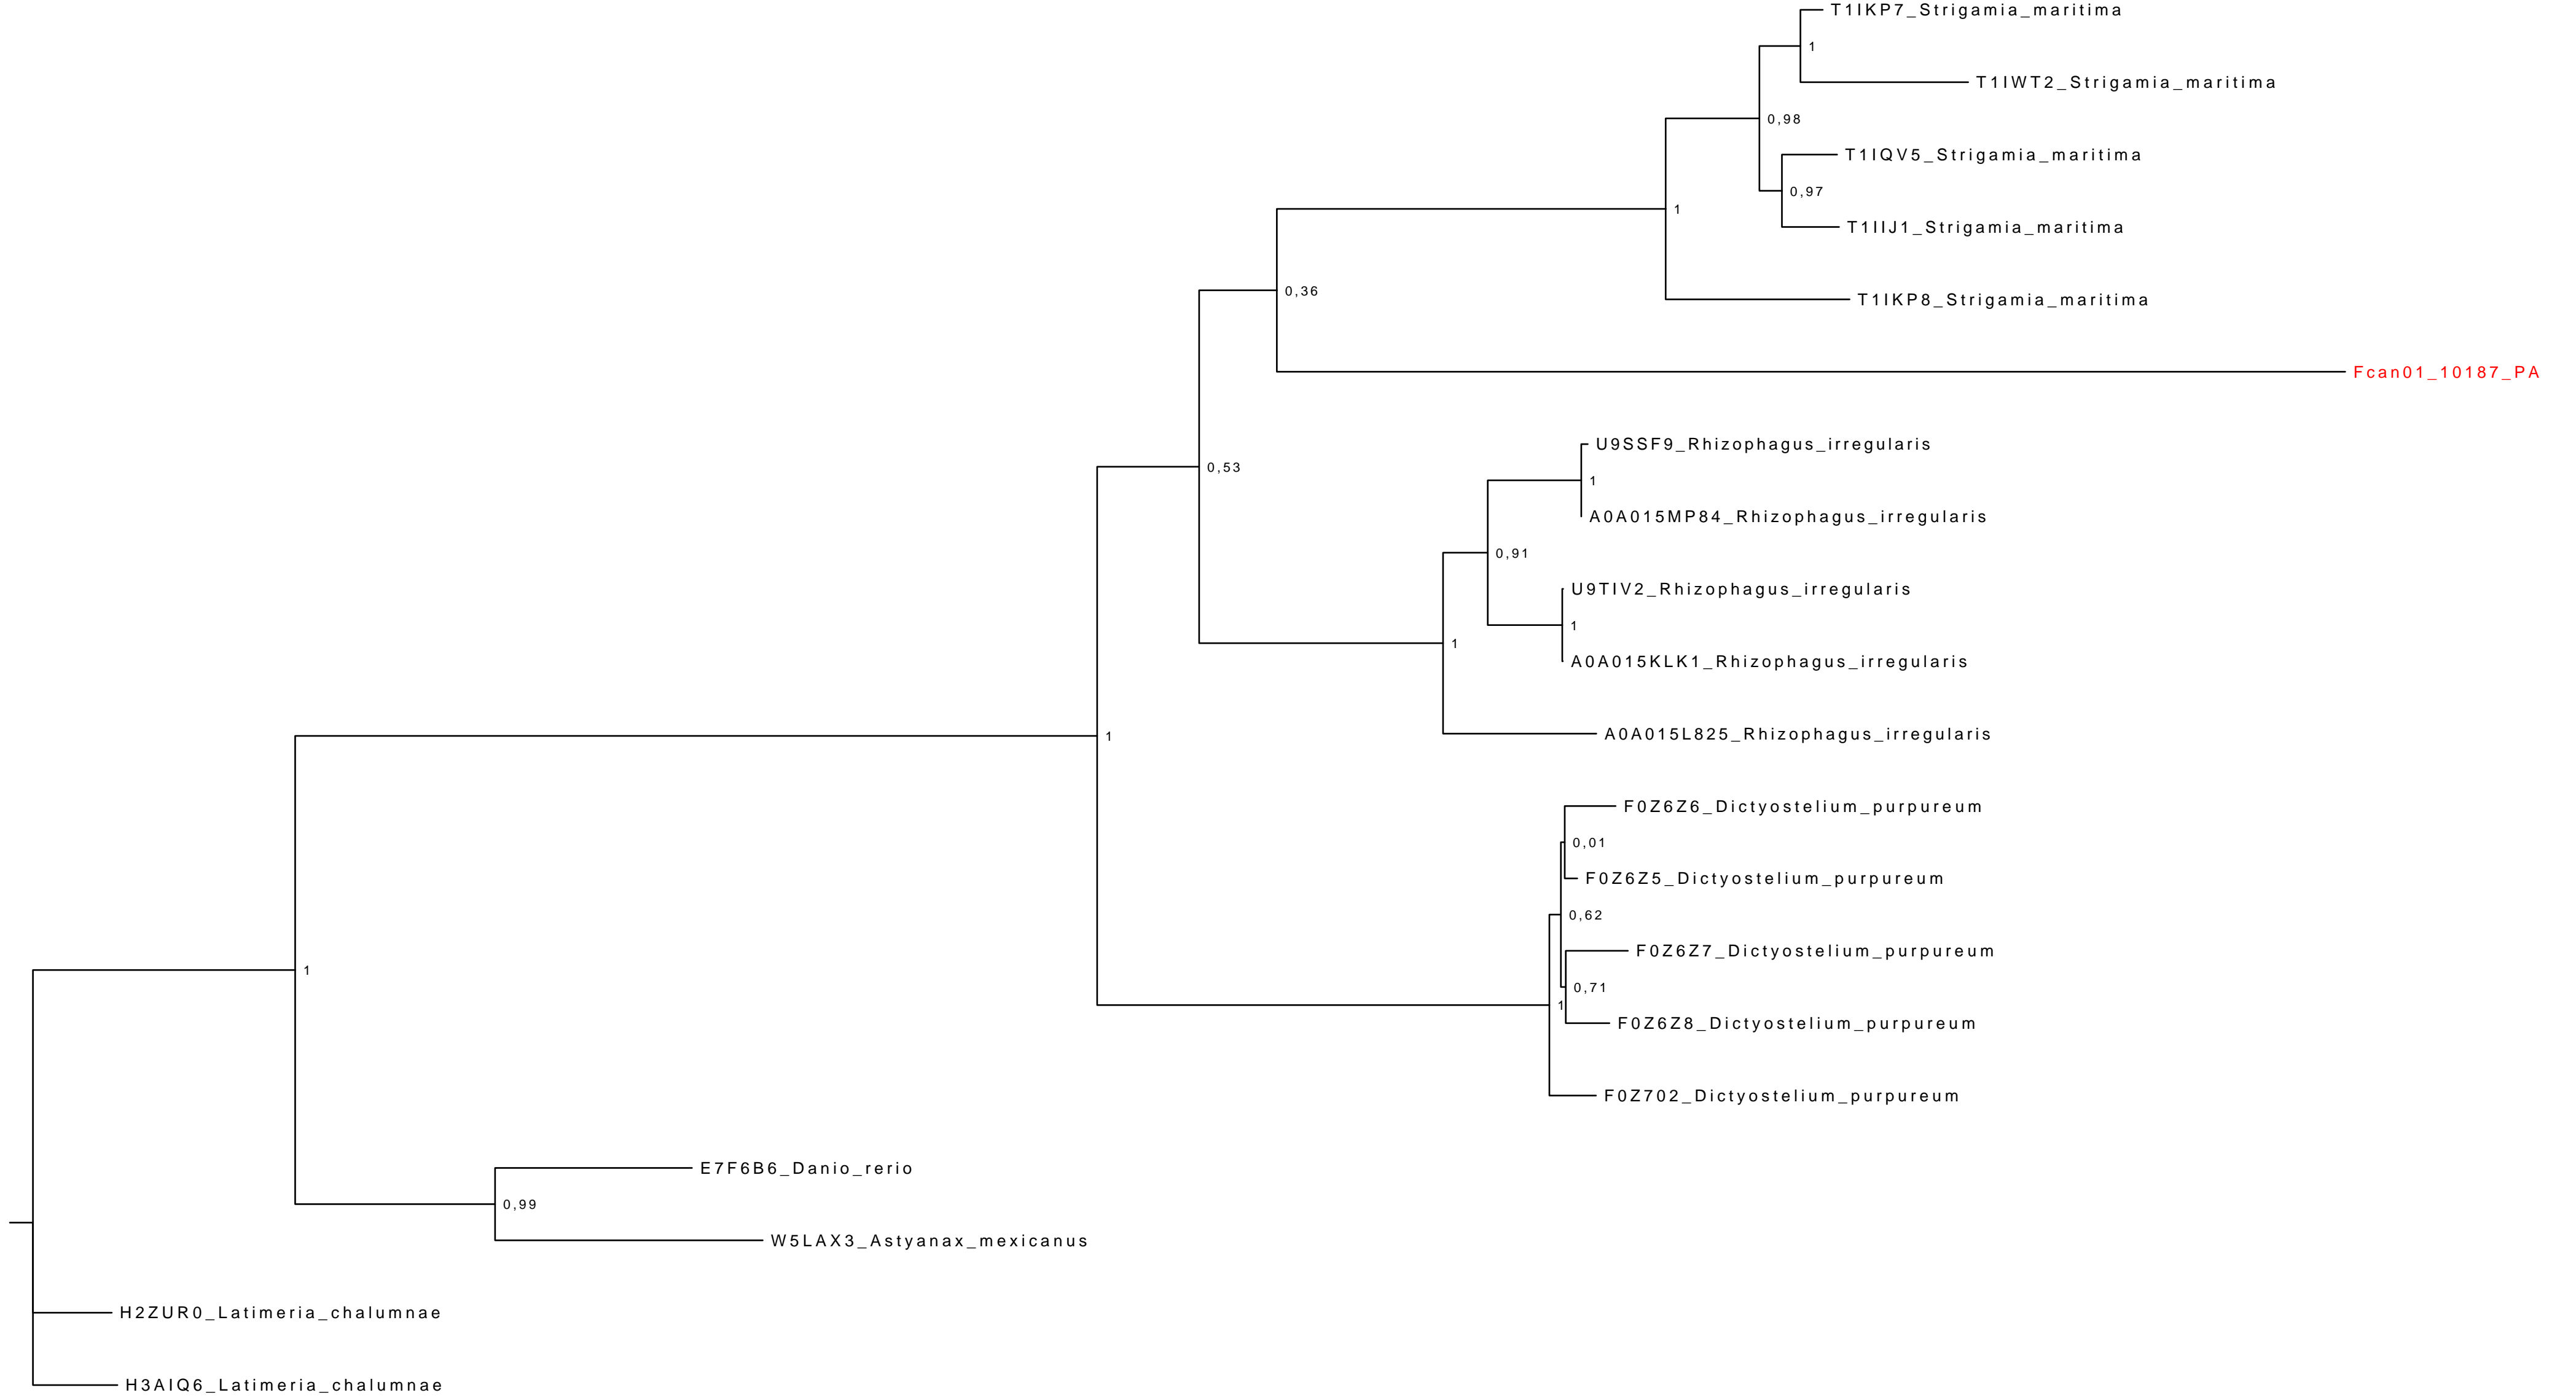

0.5

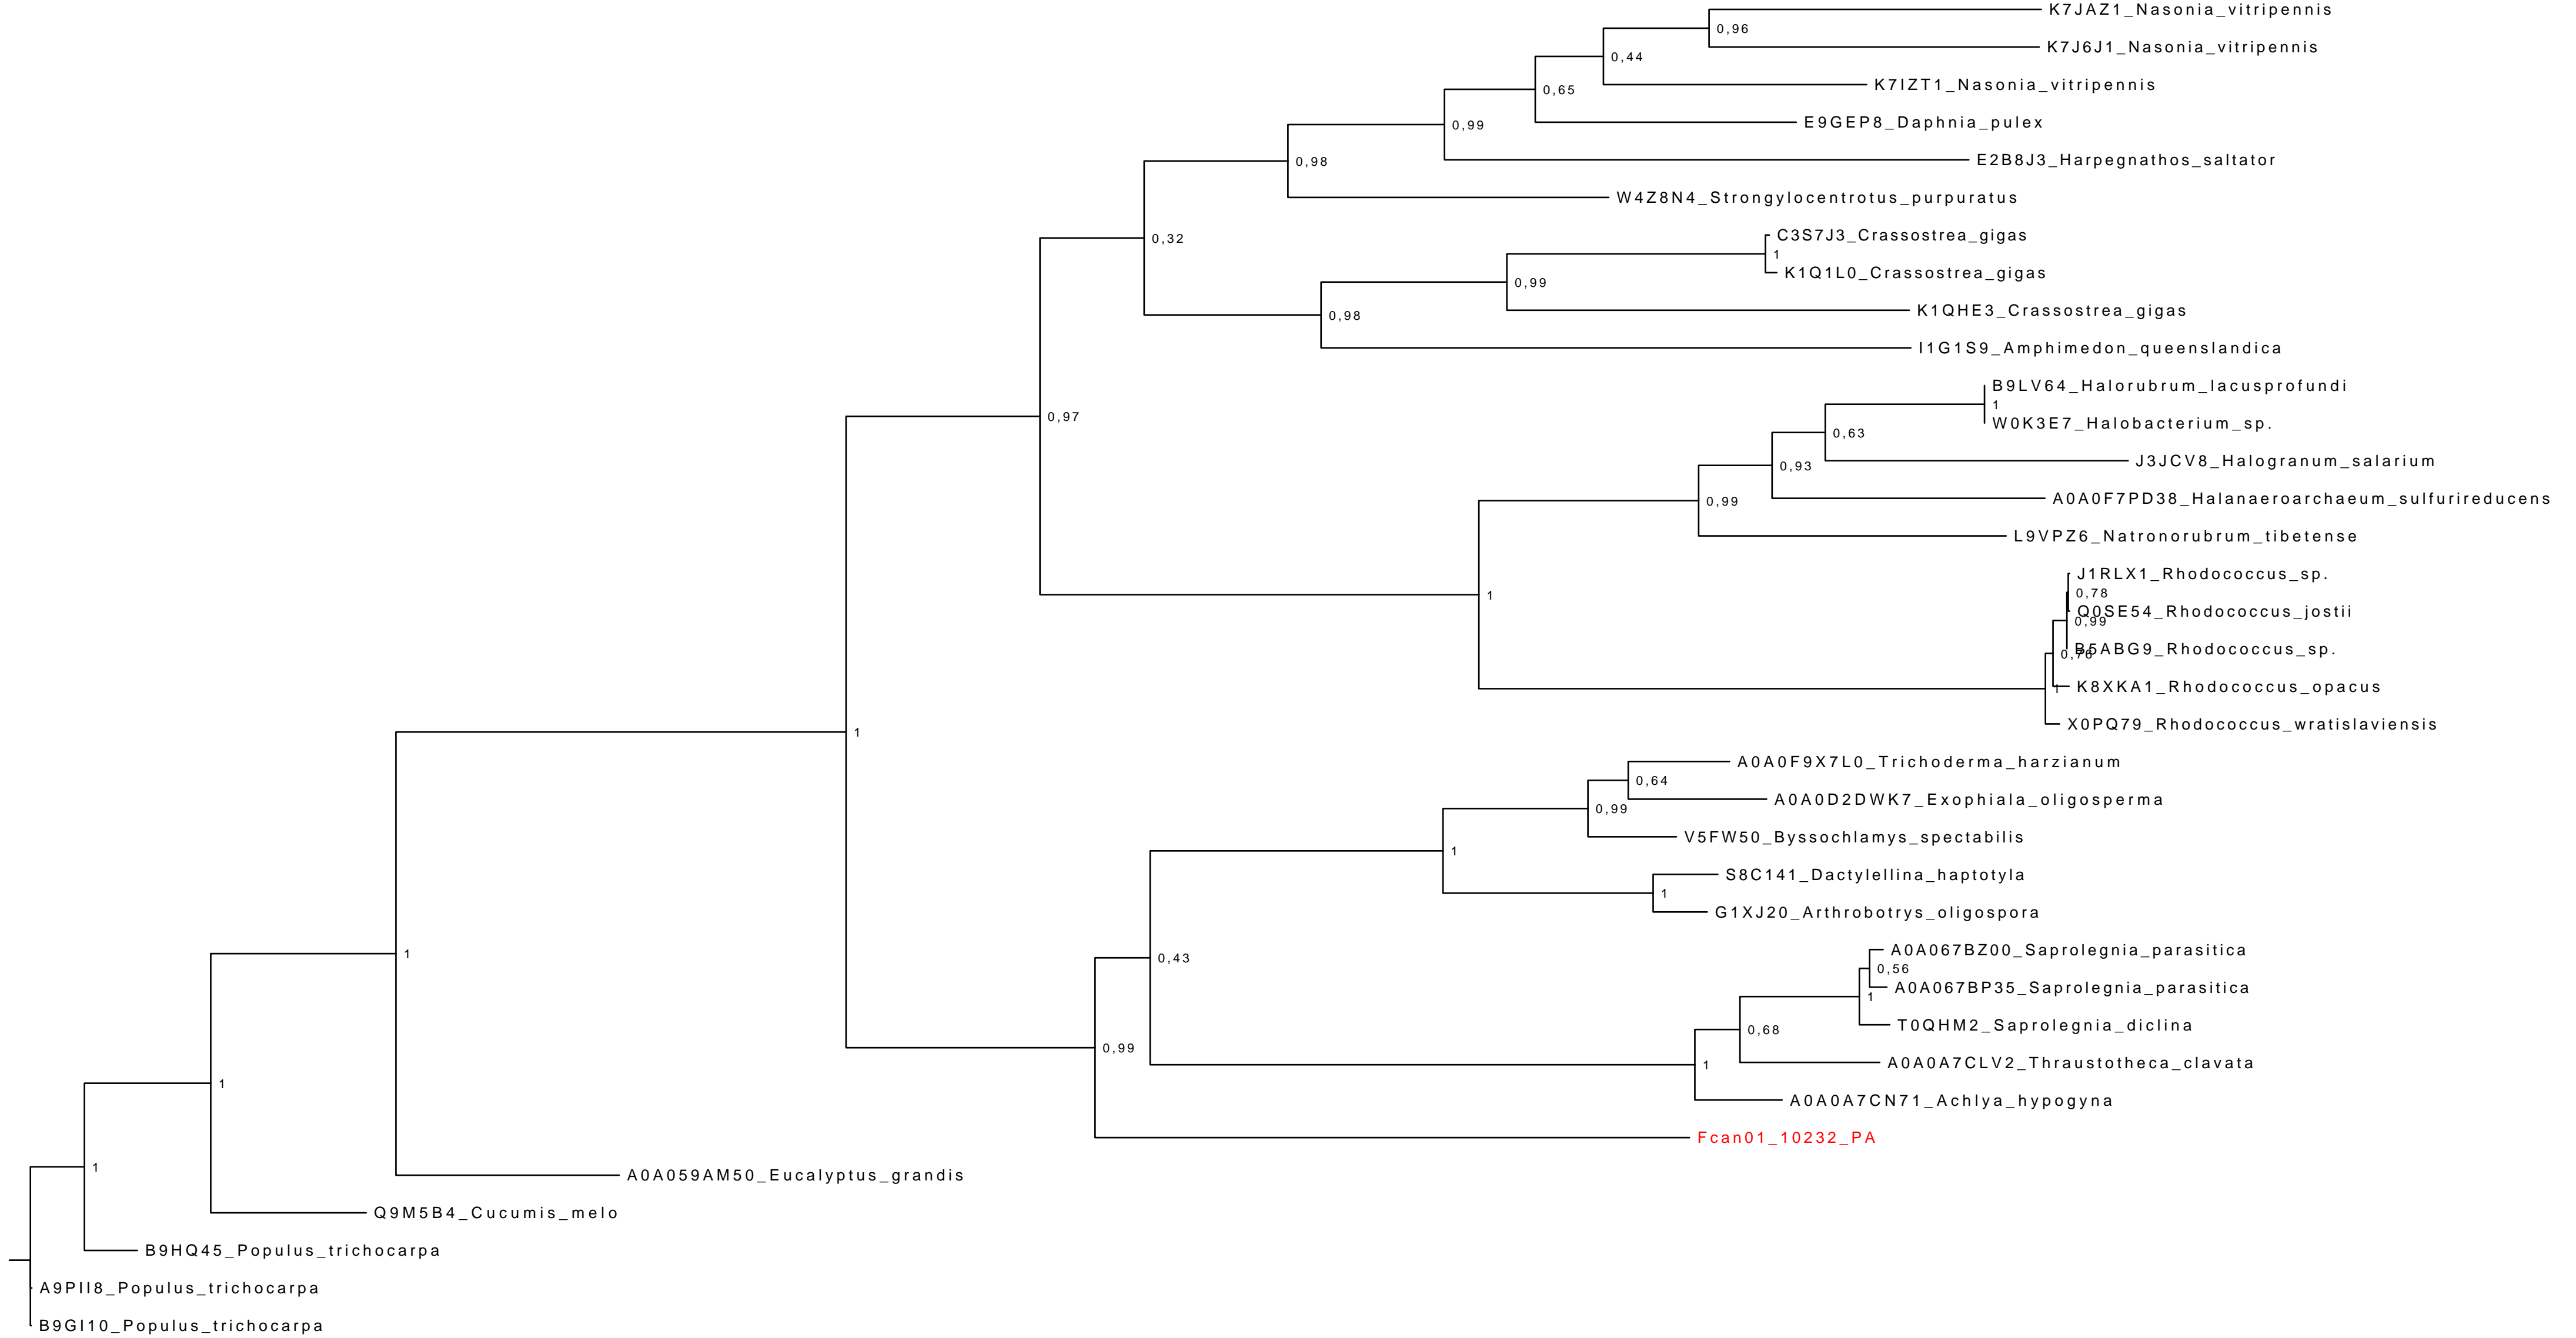

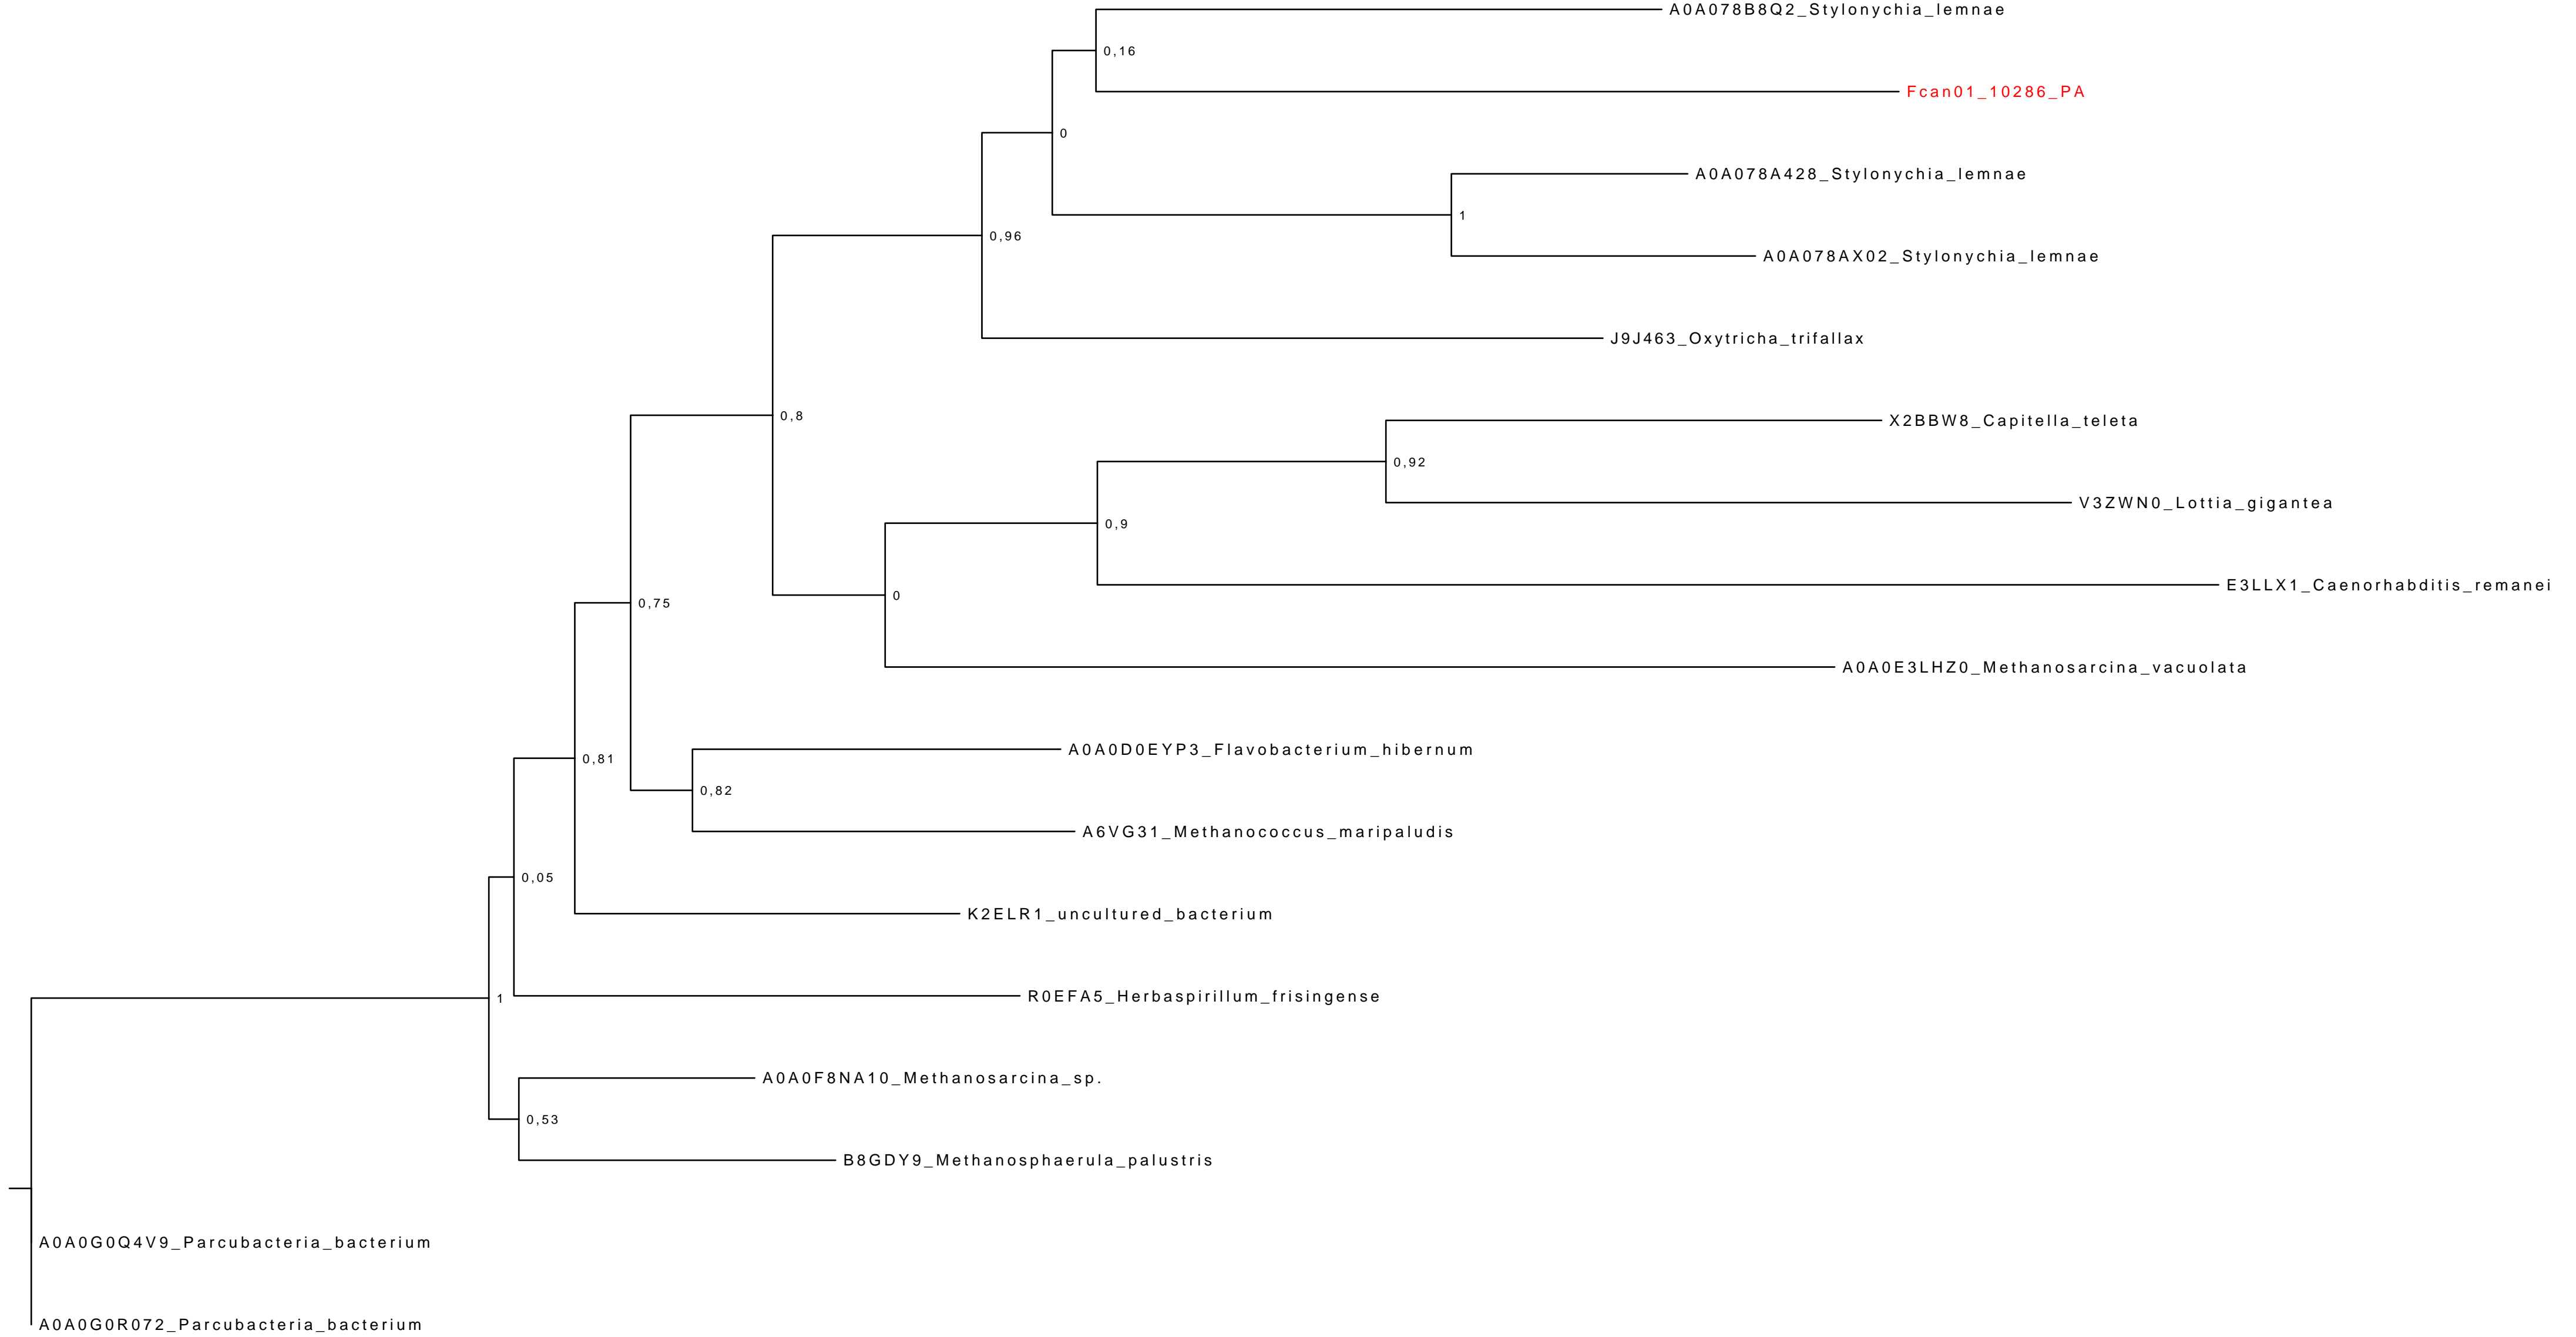





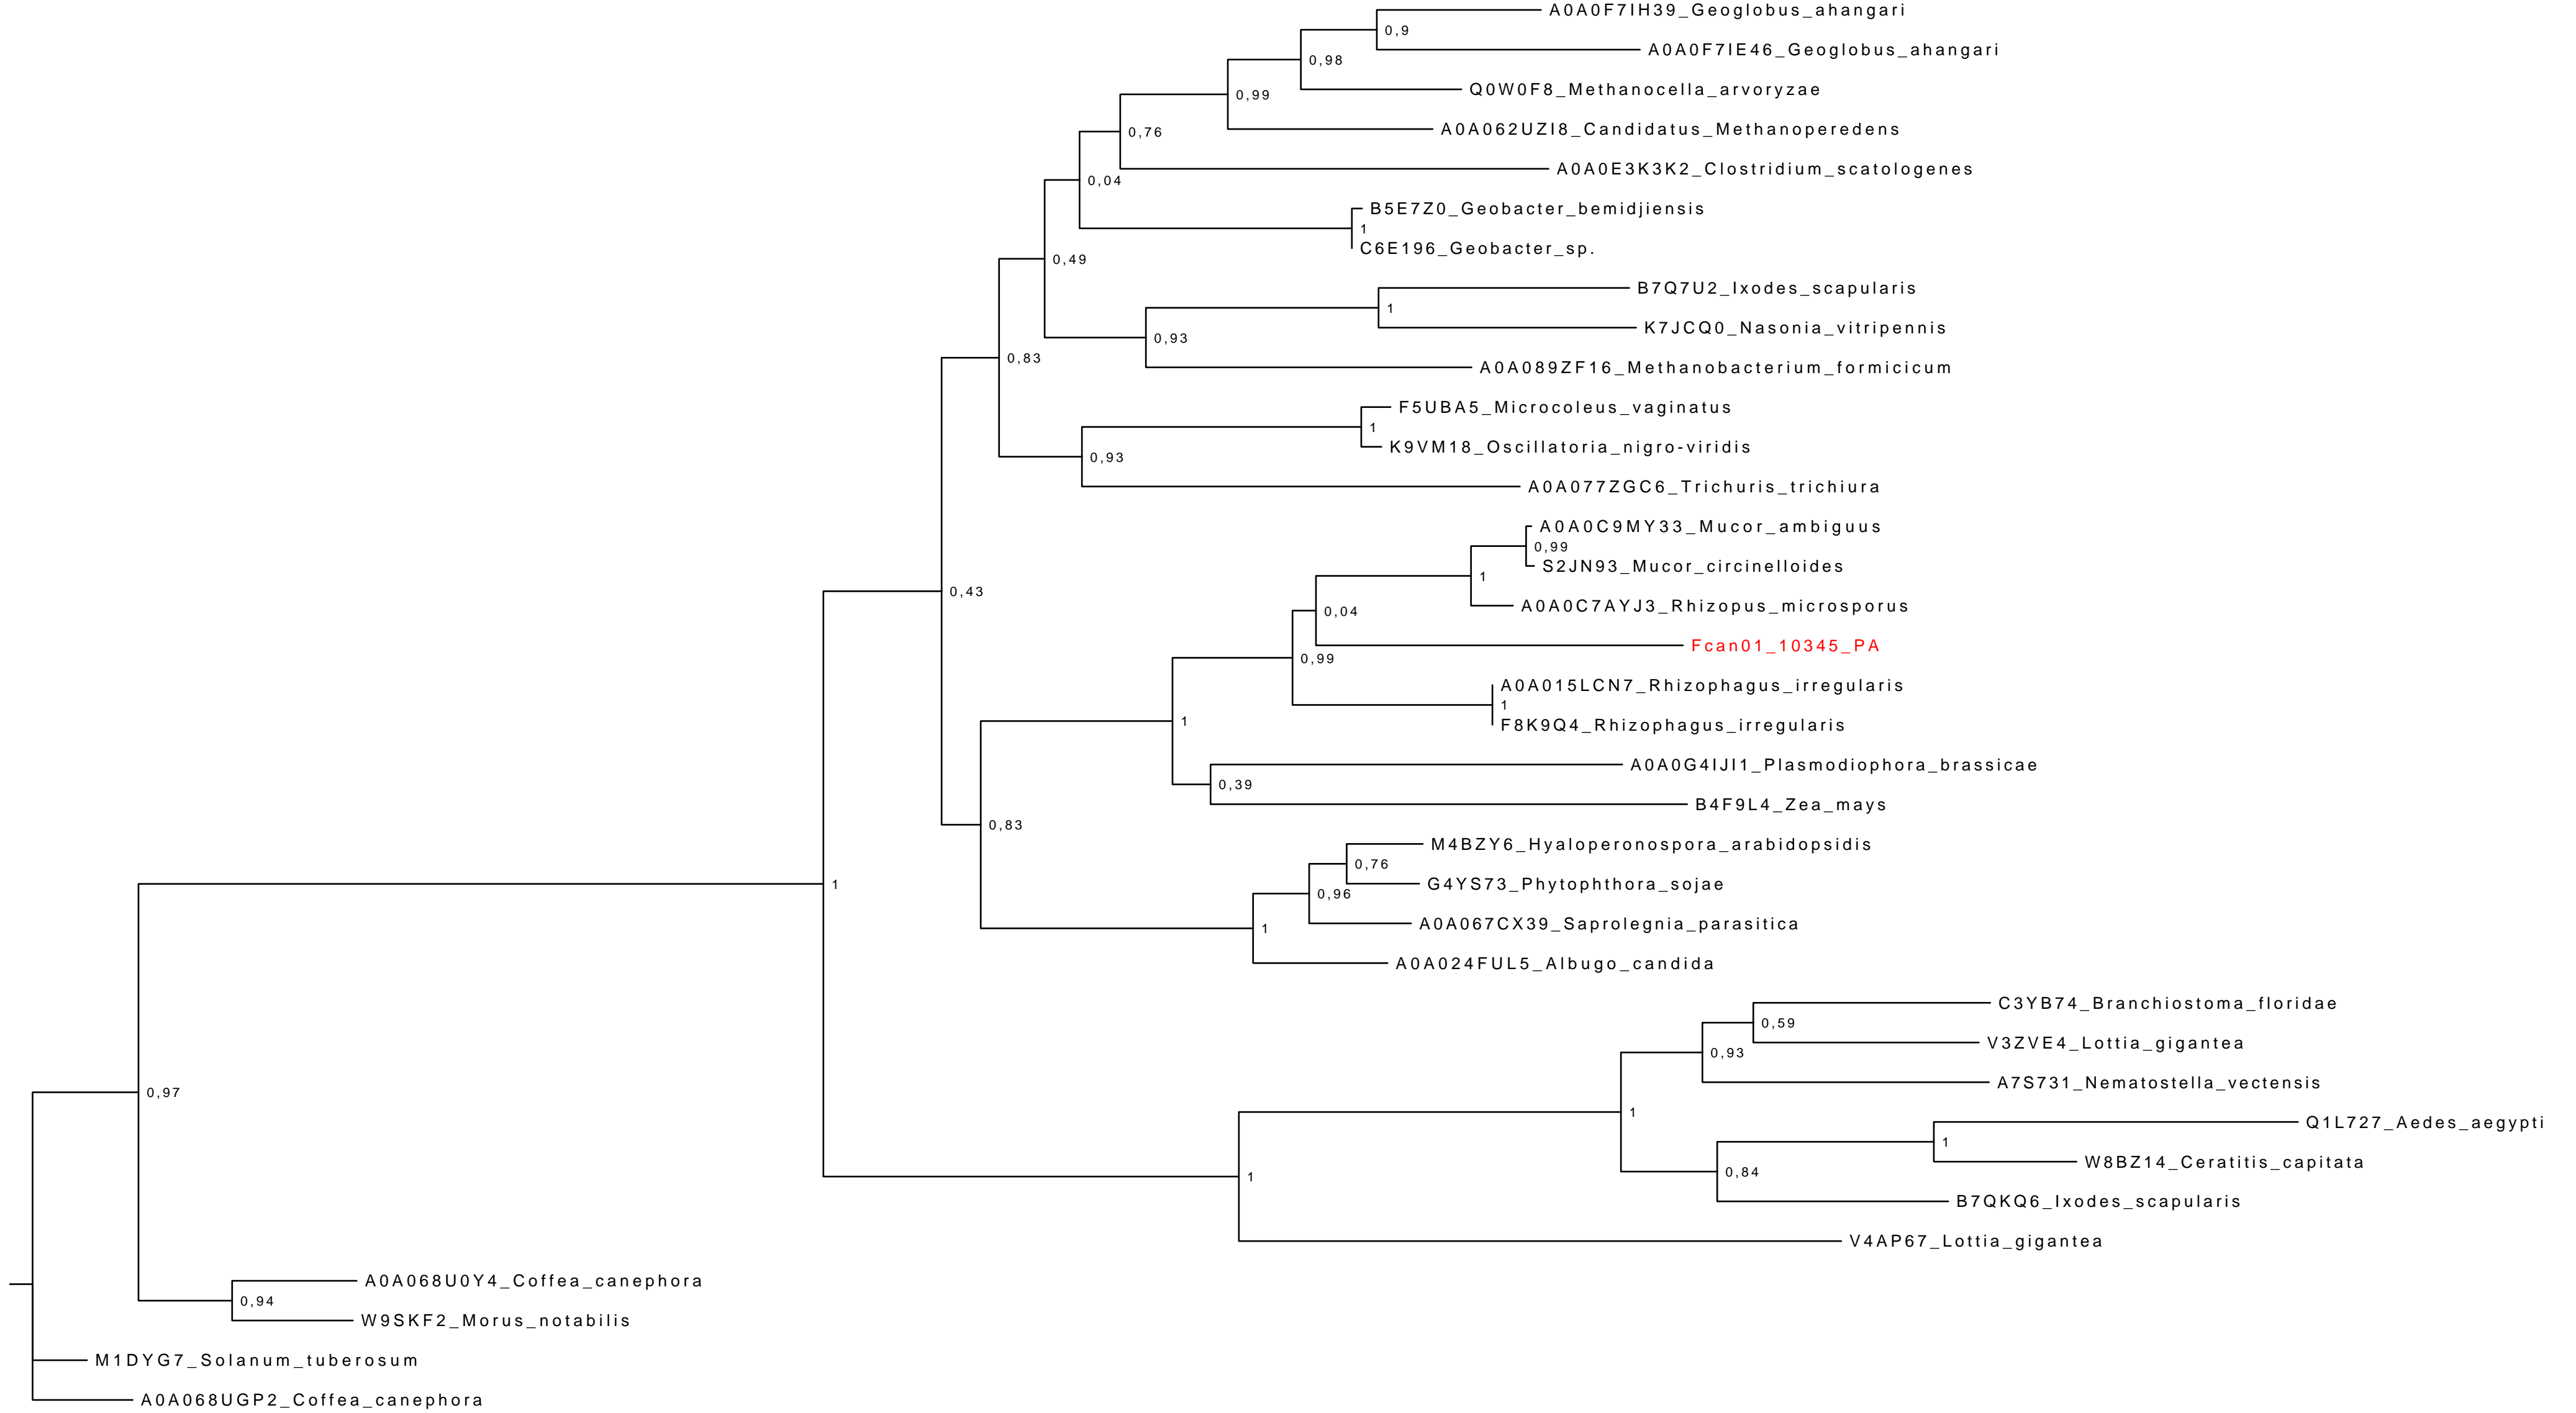

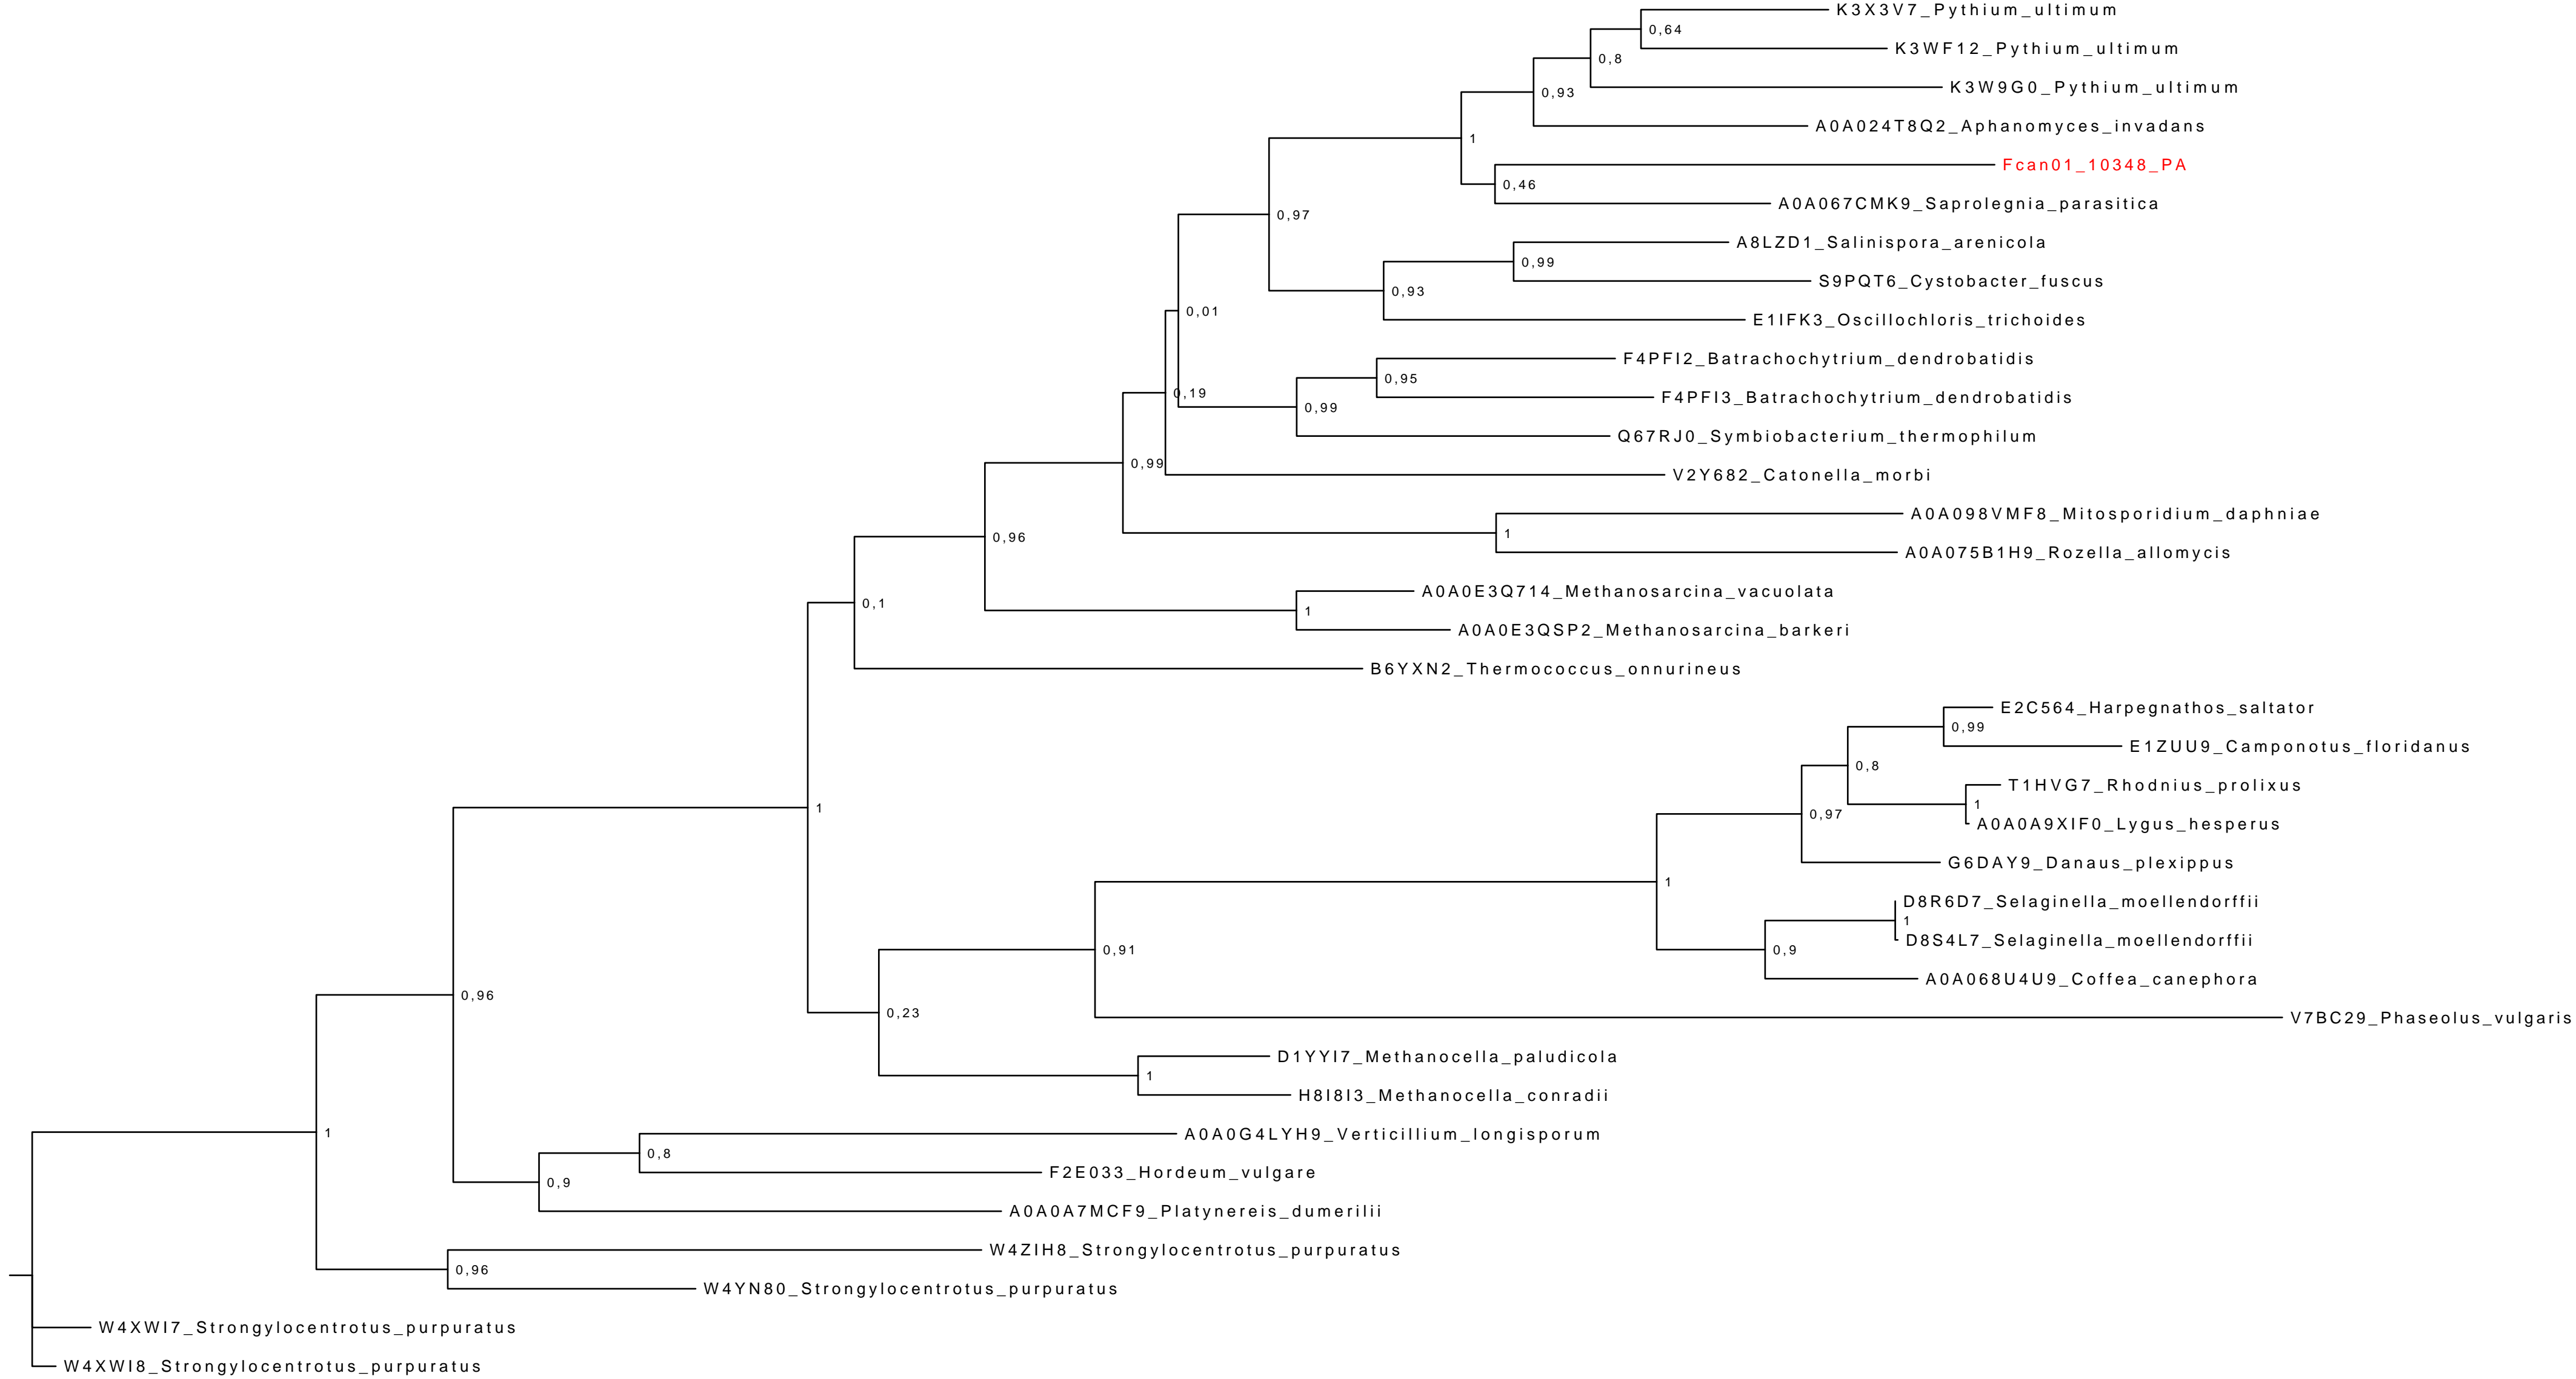

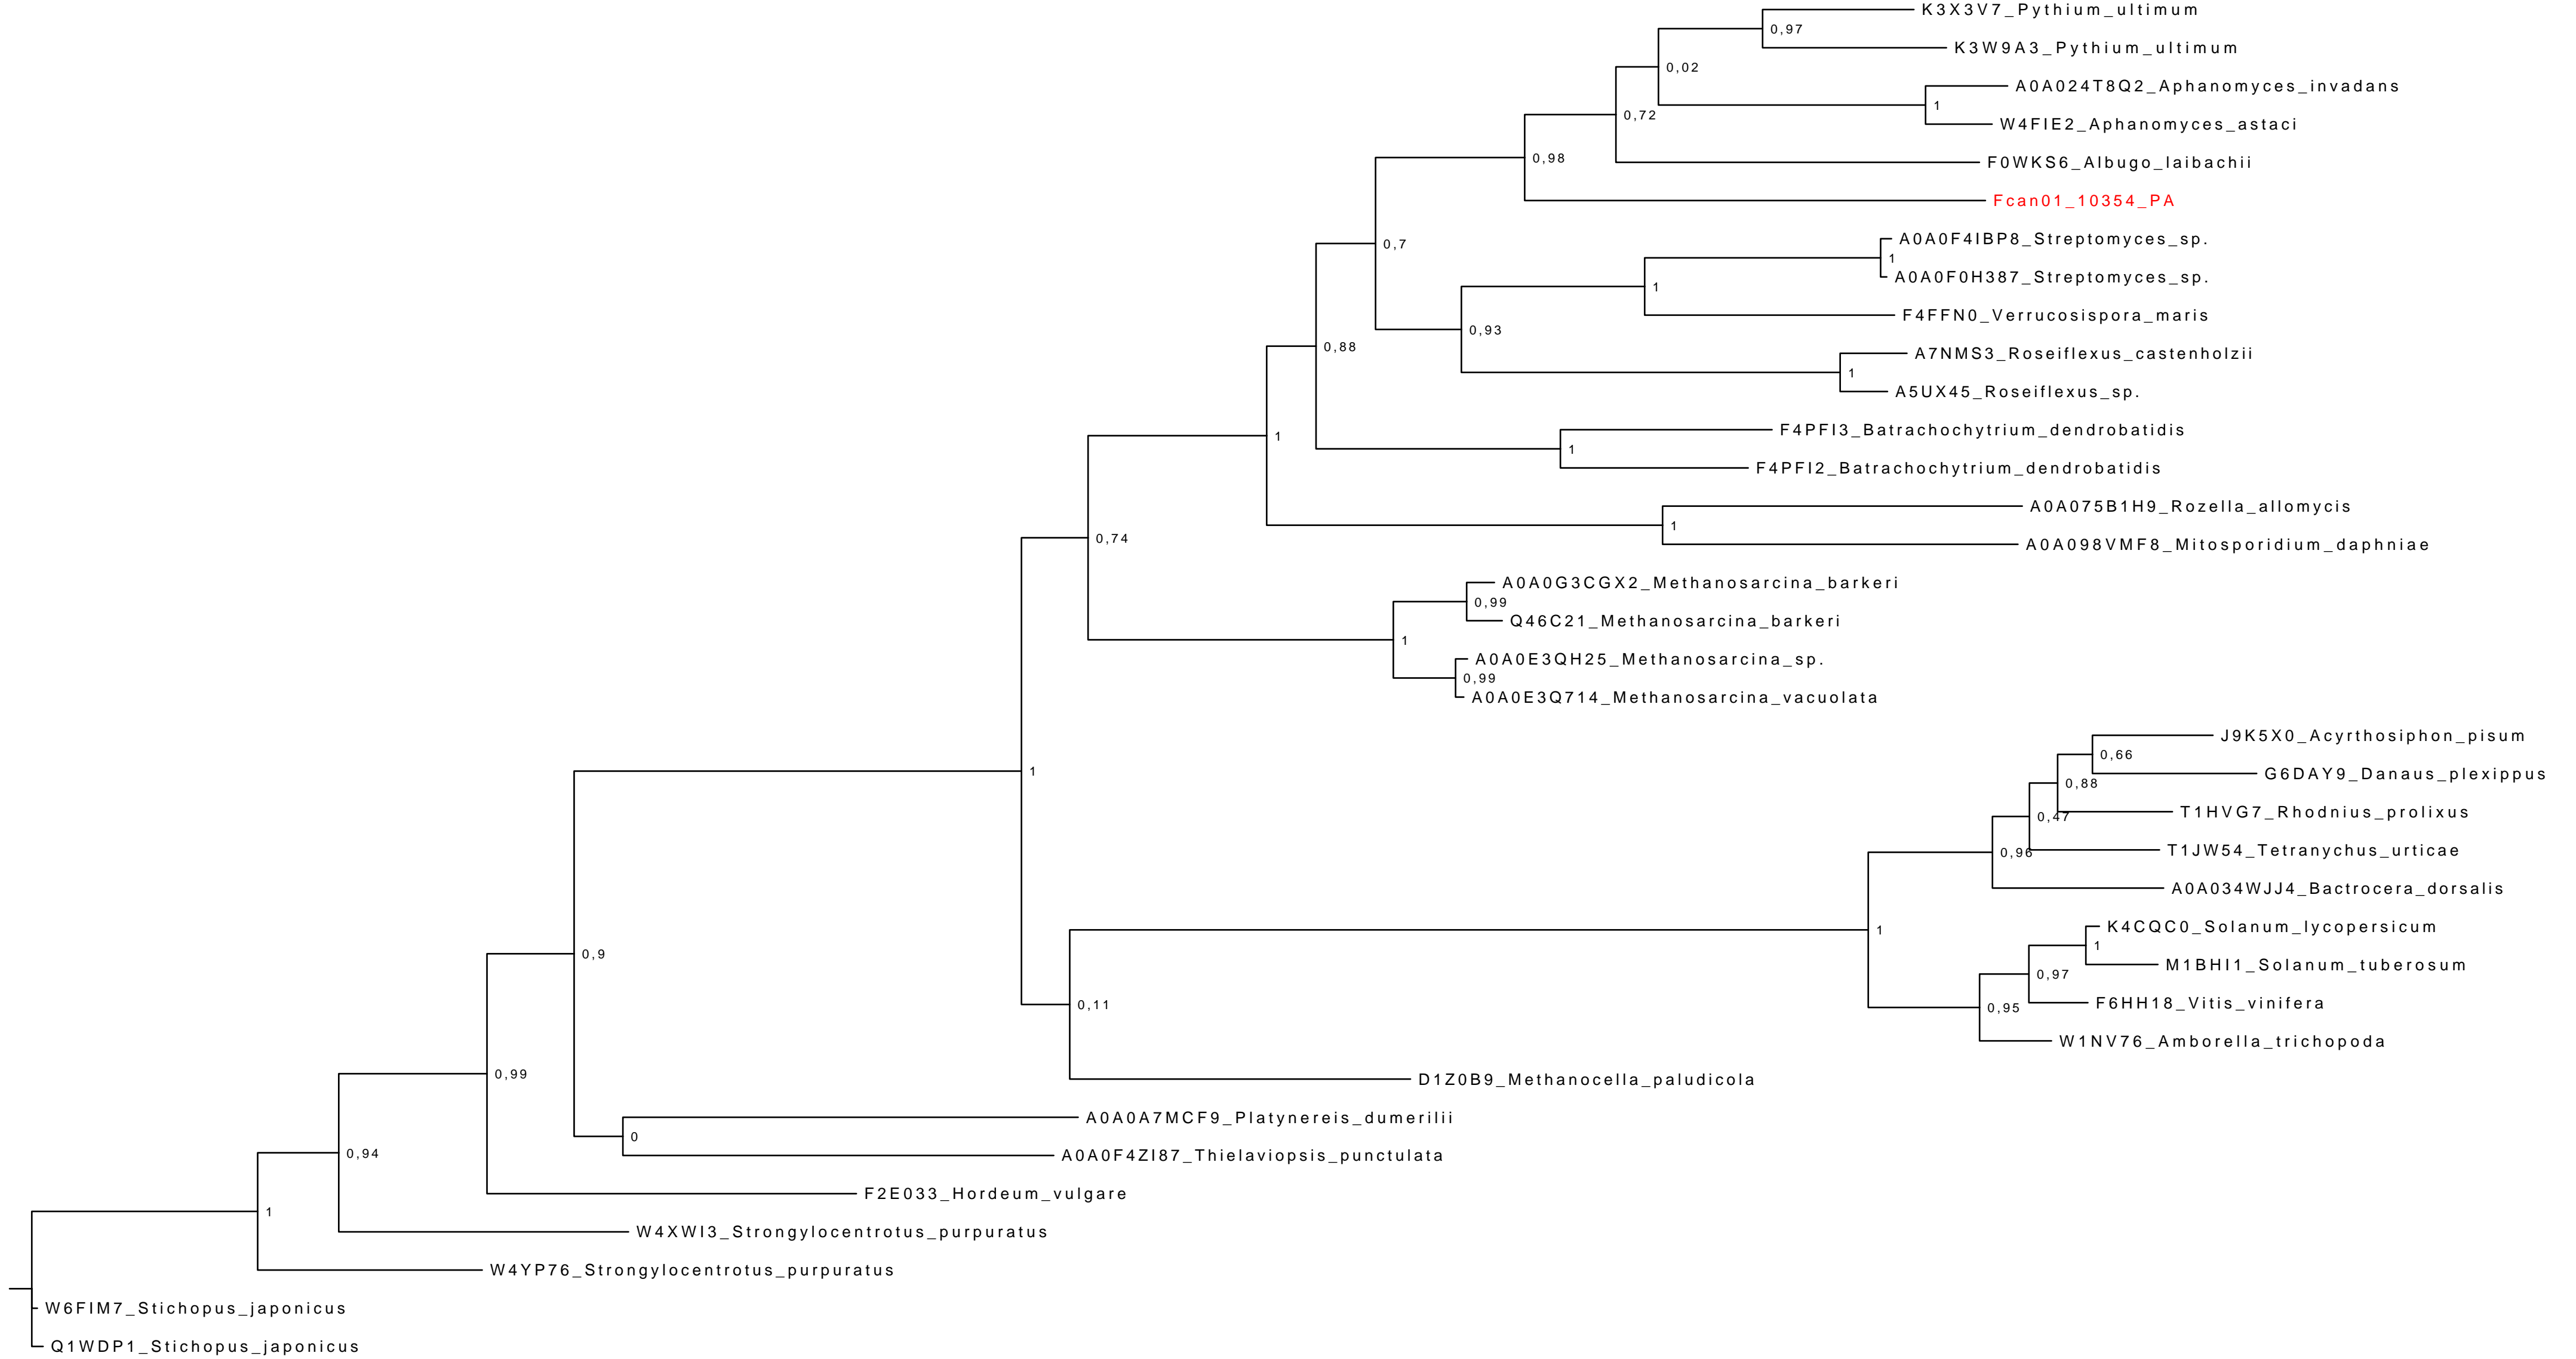

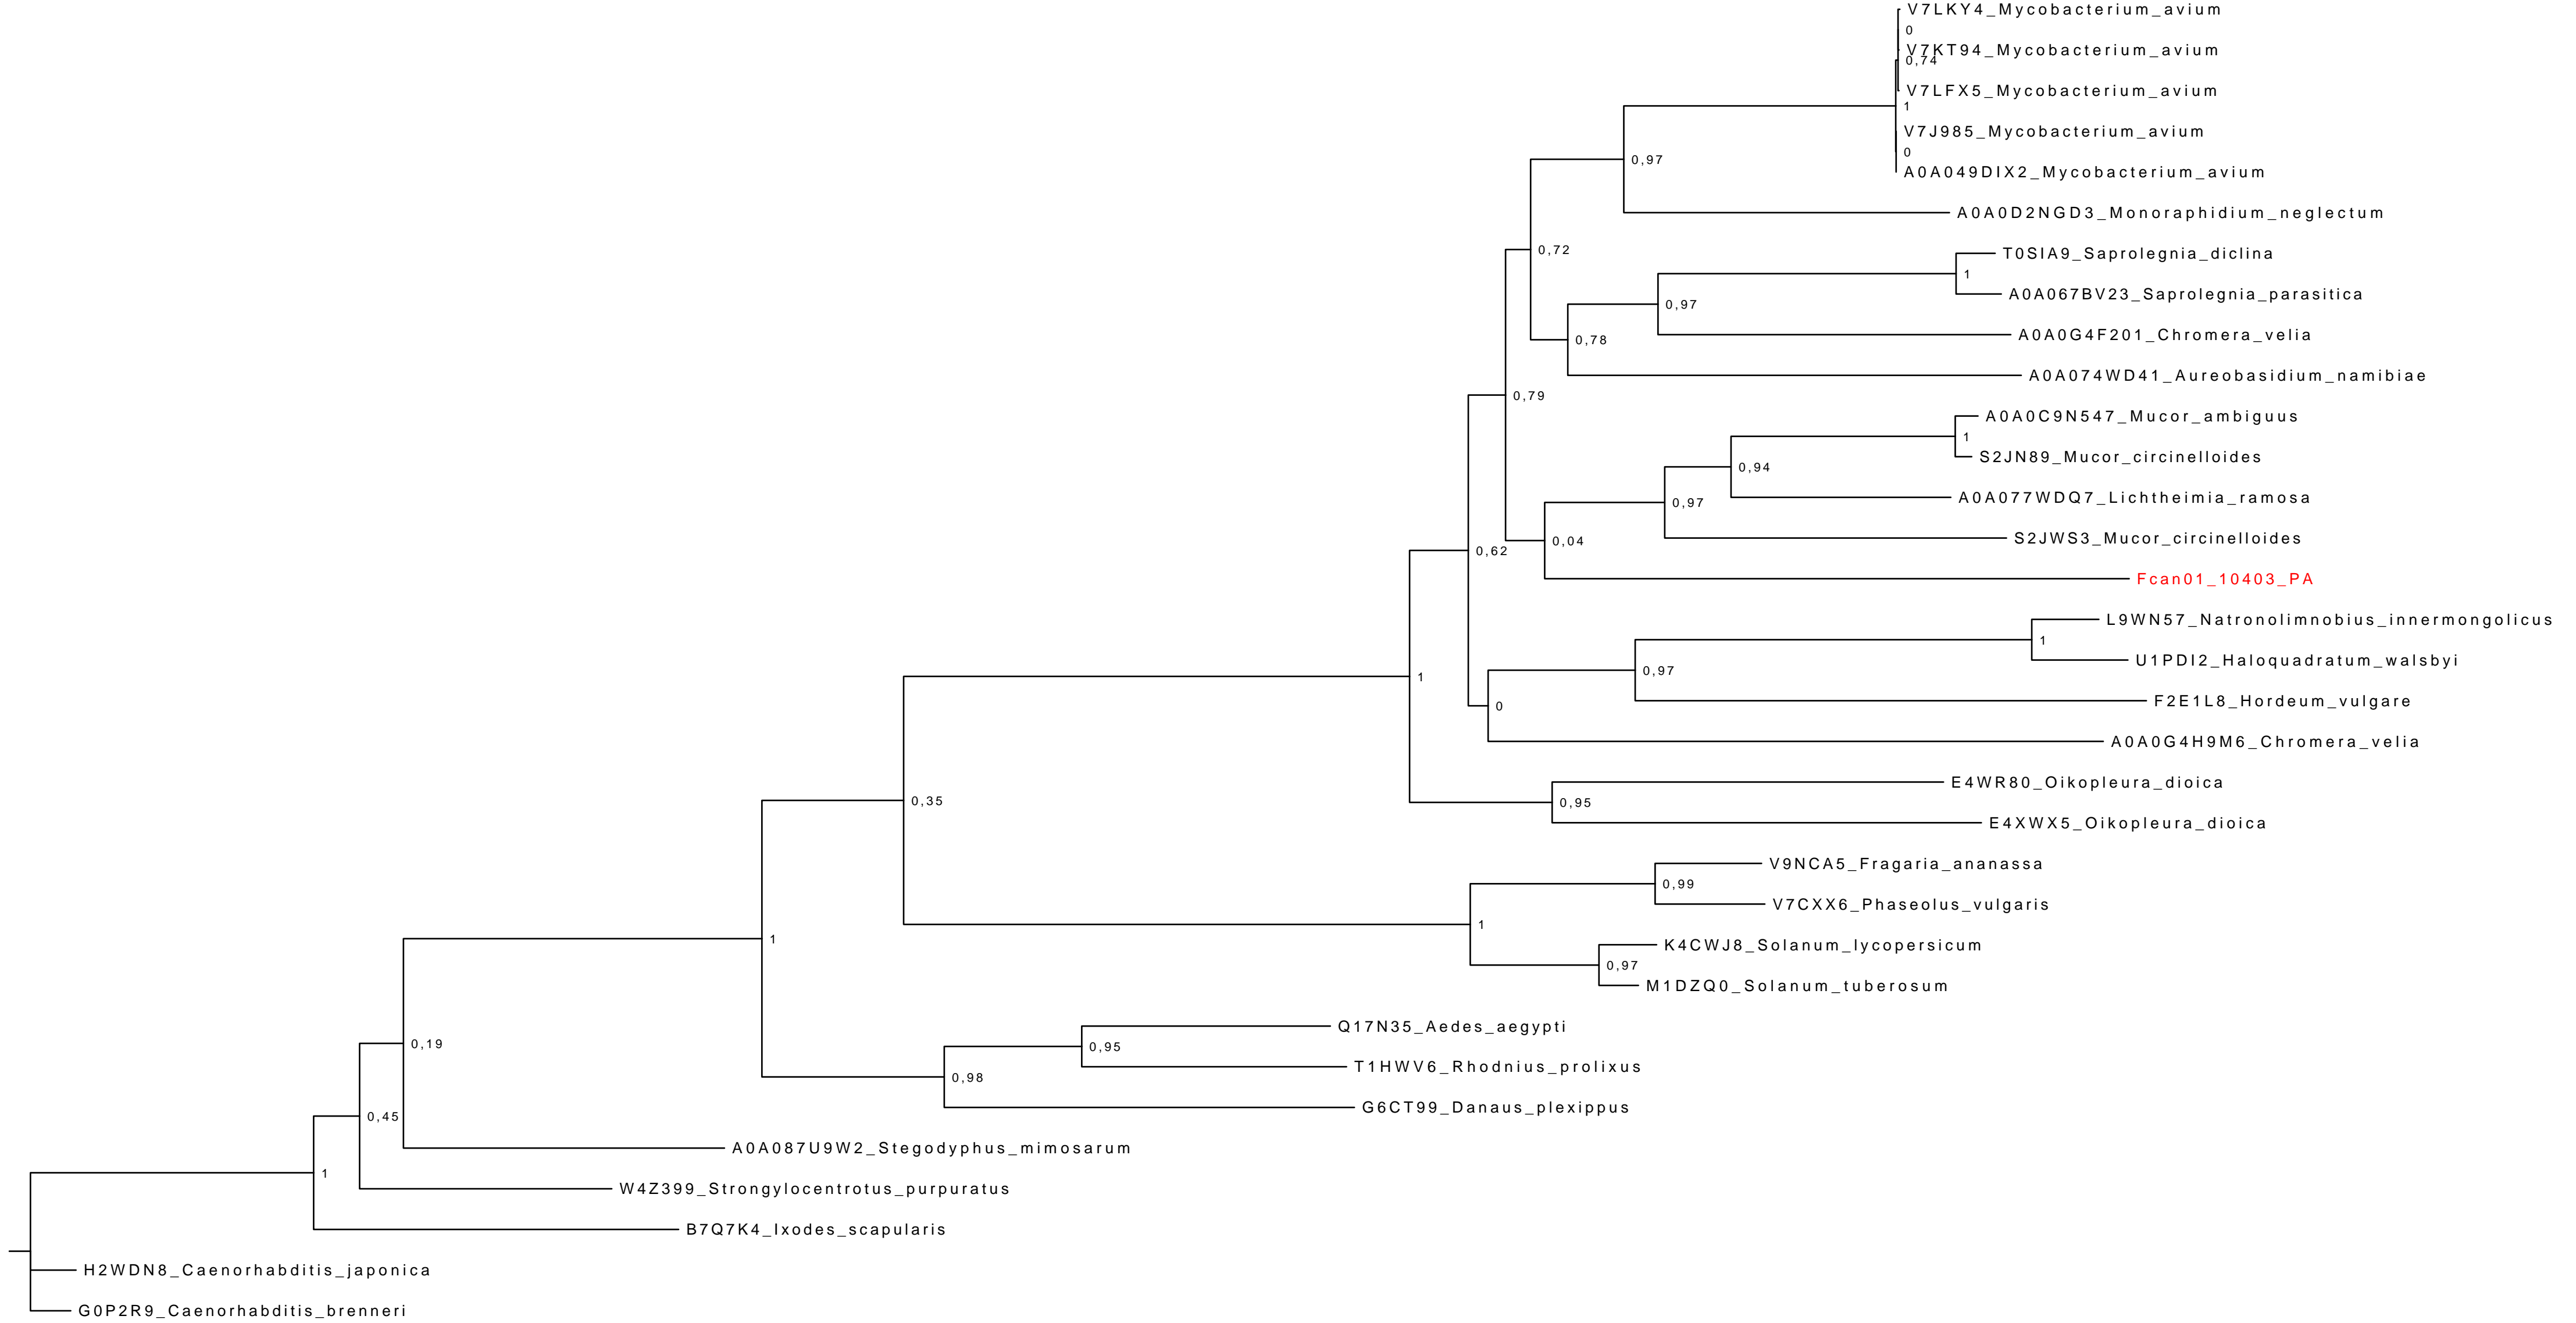

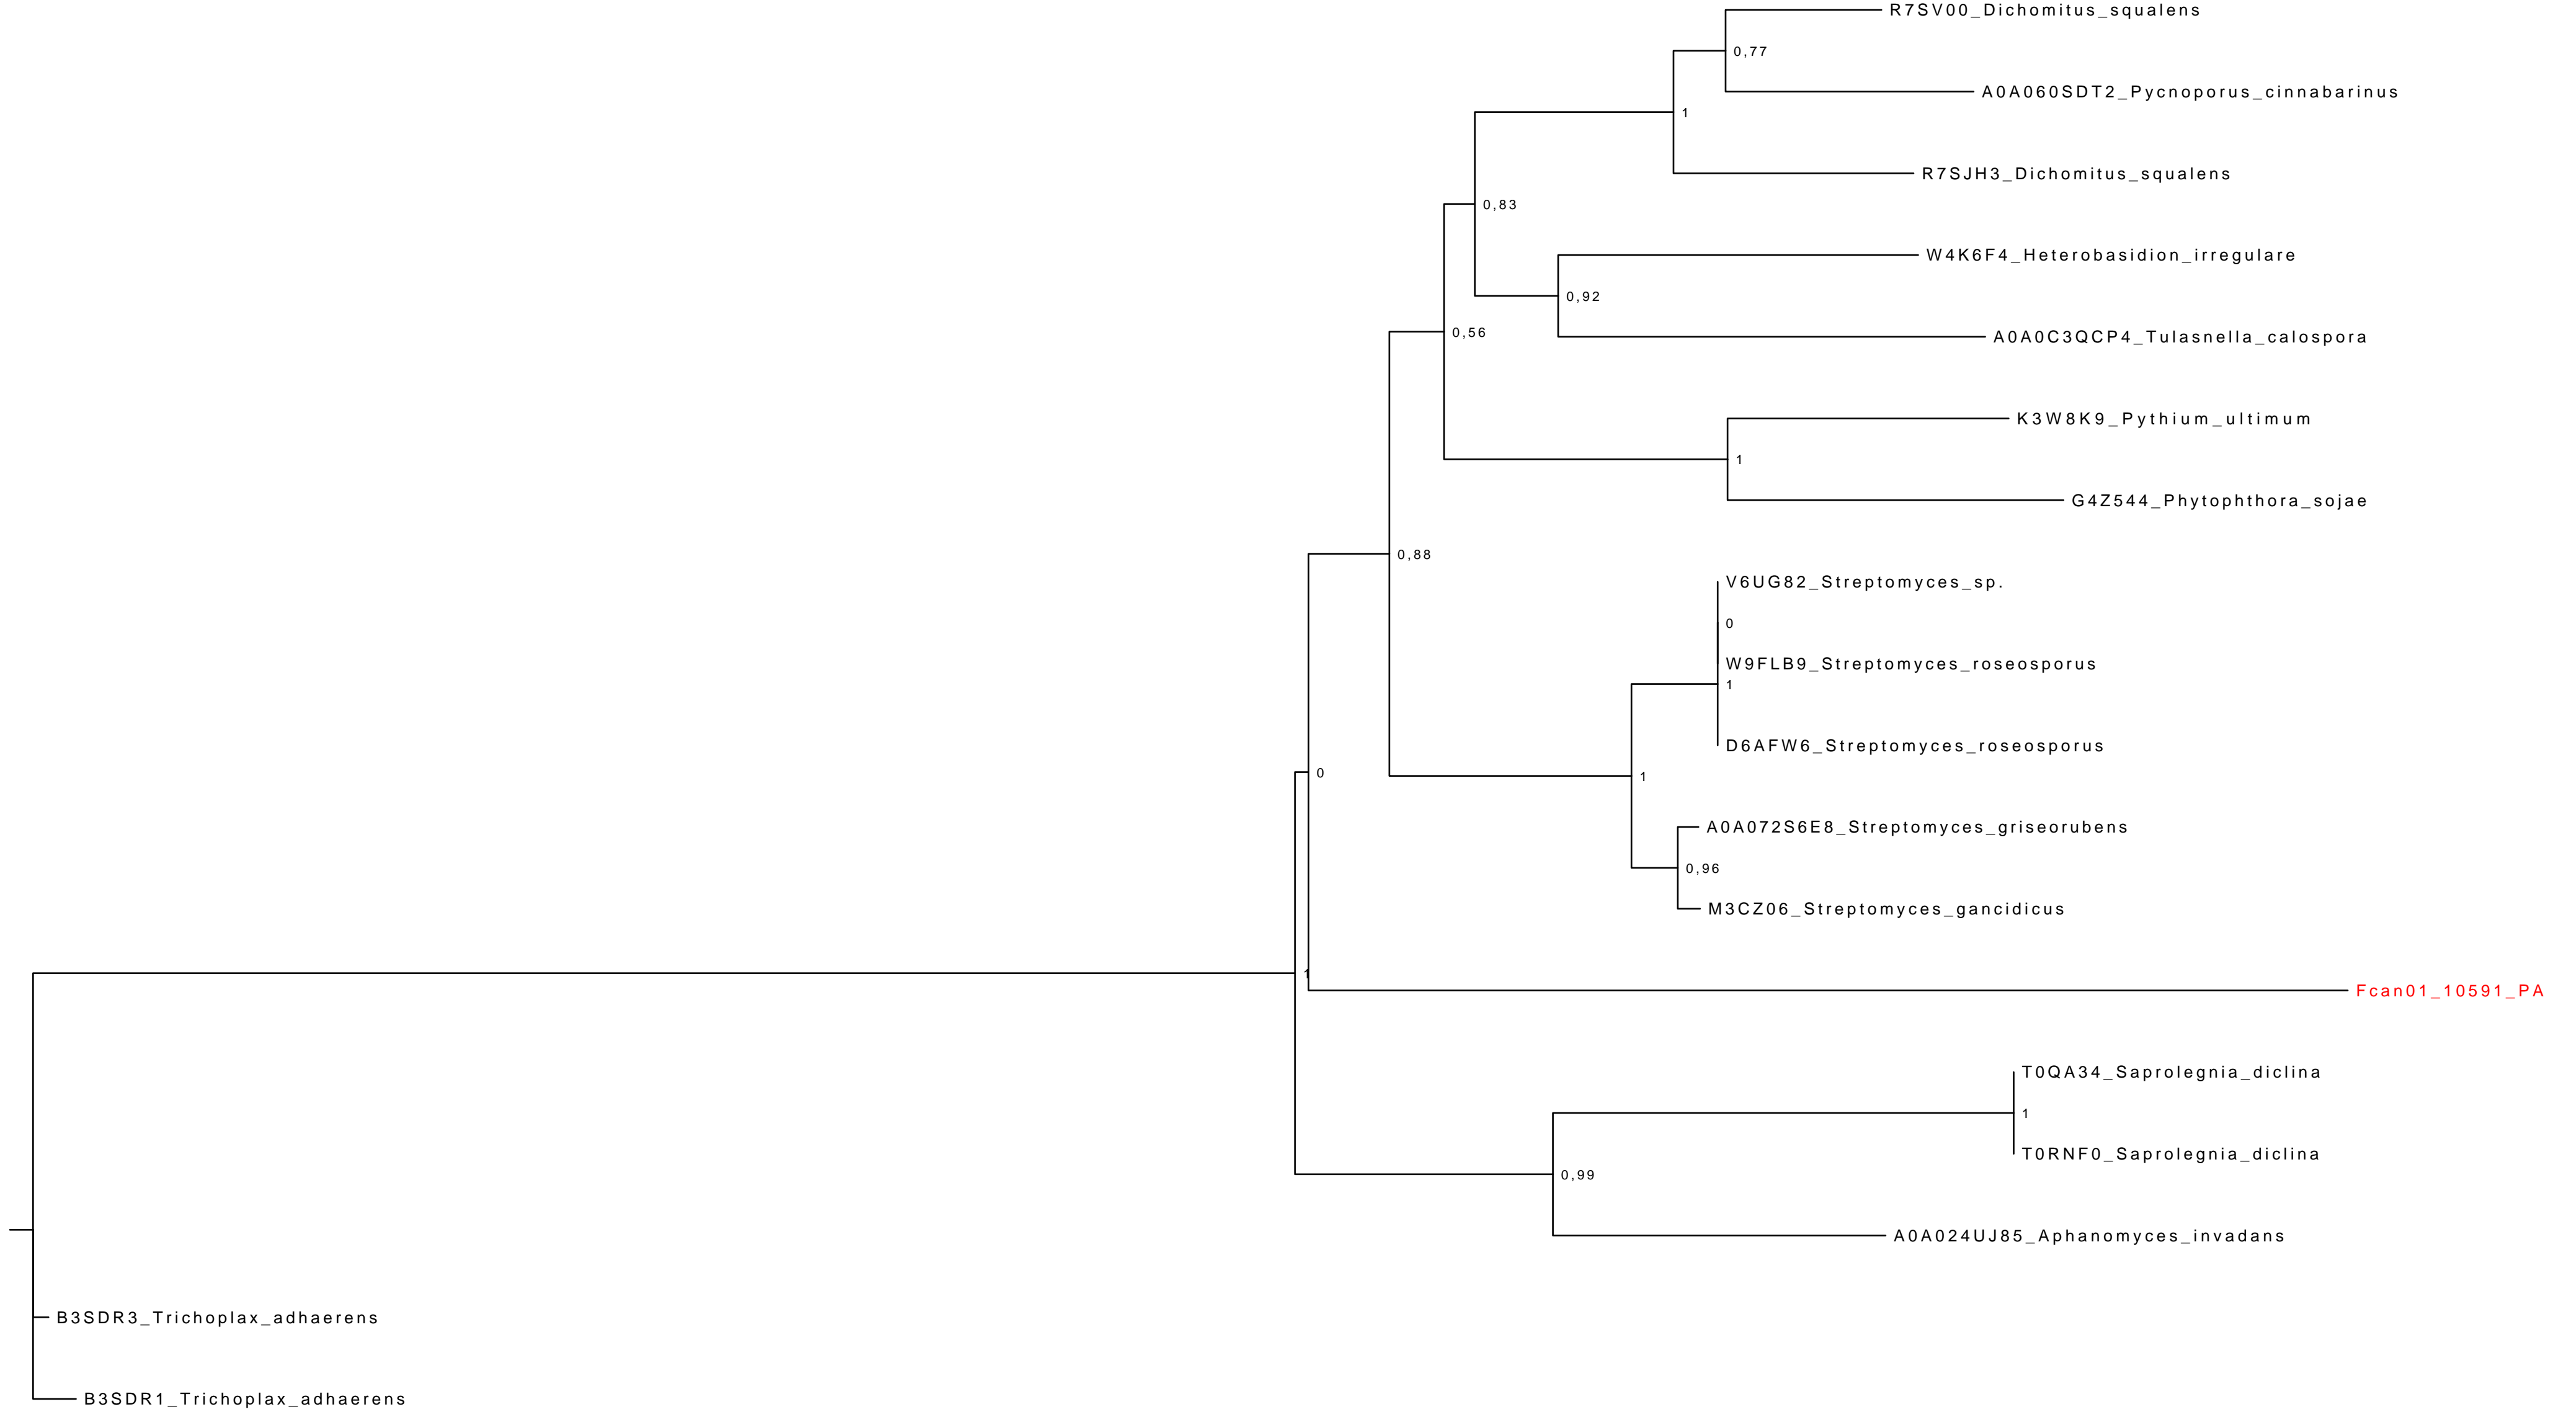

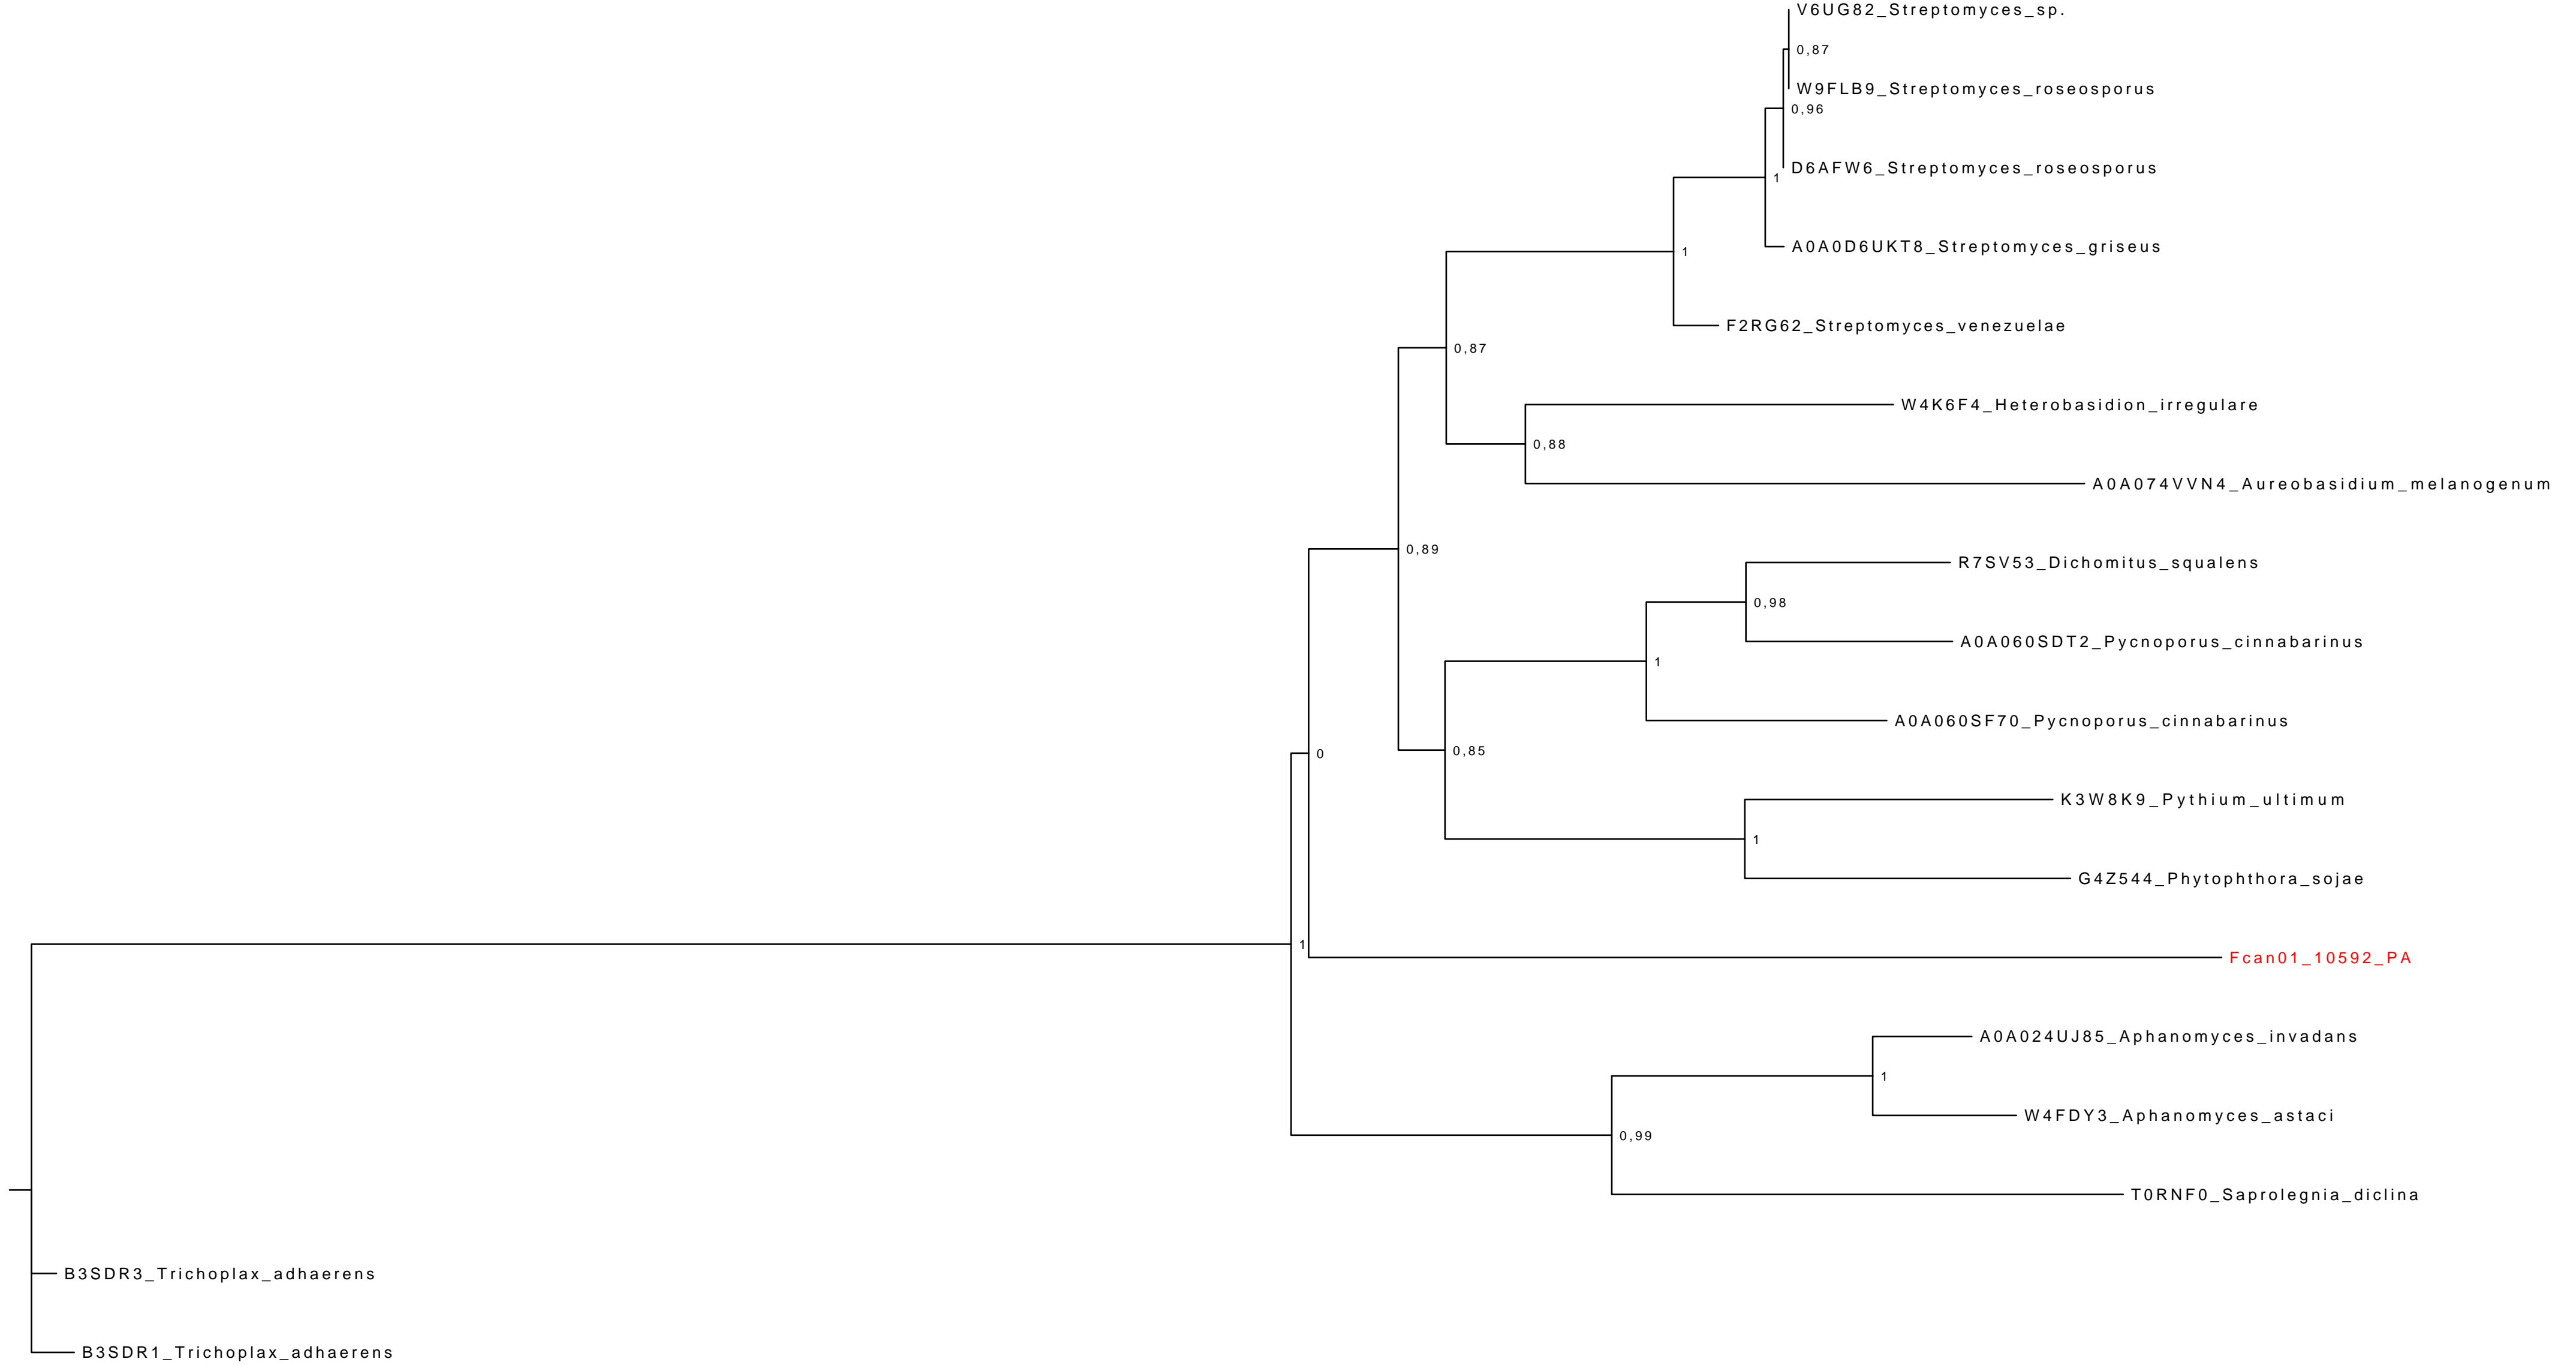

0.5

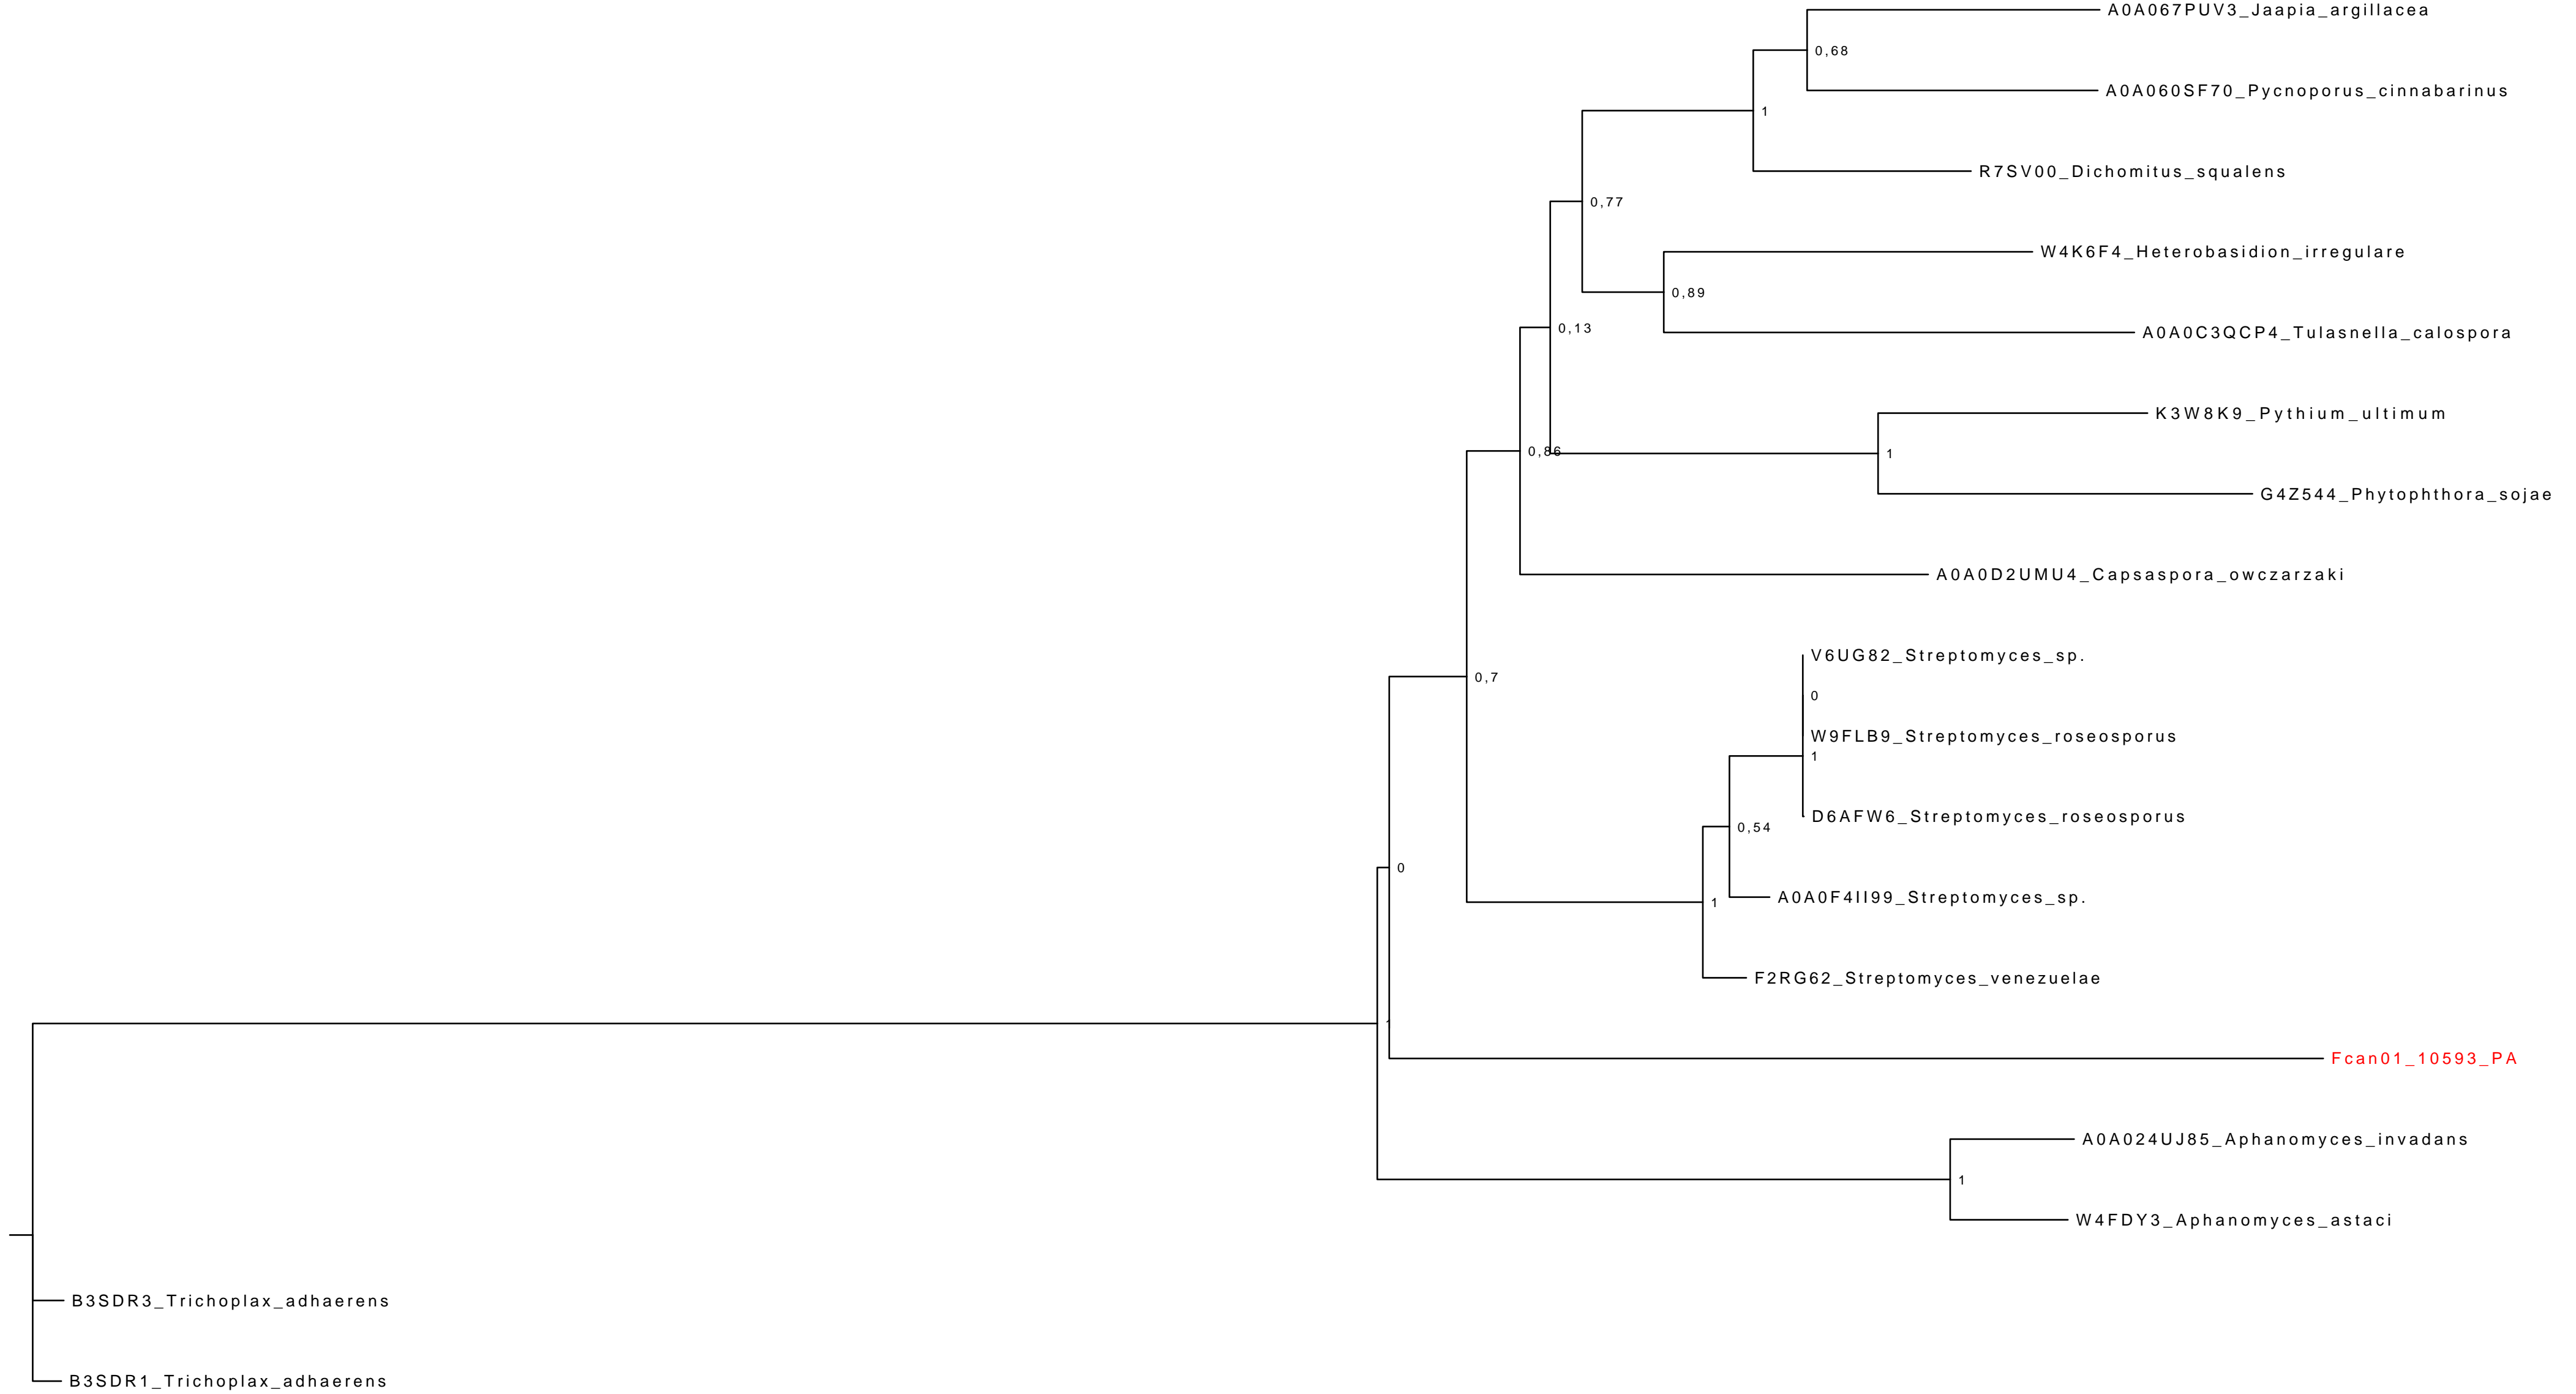

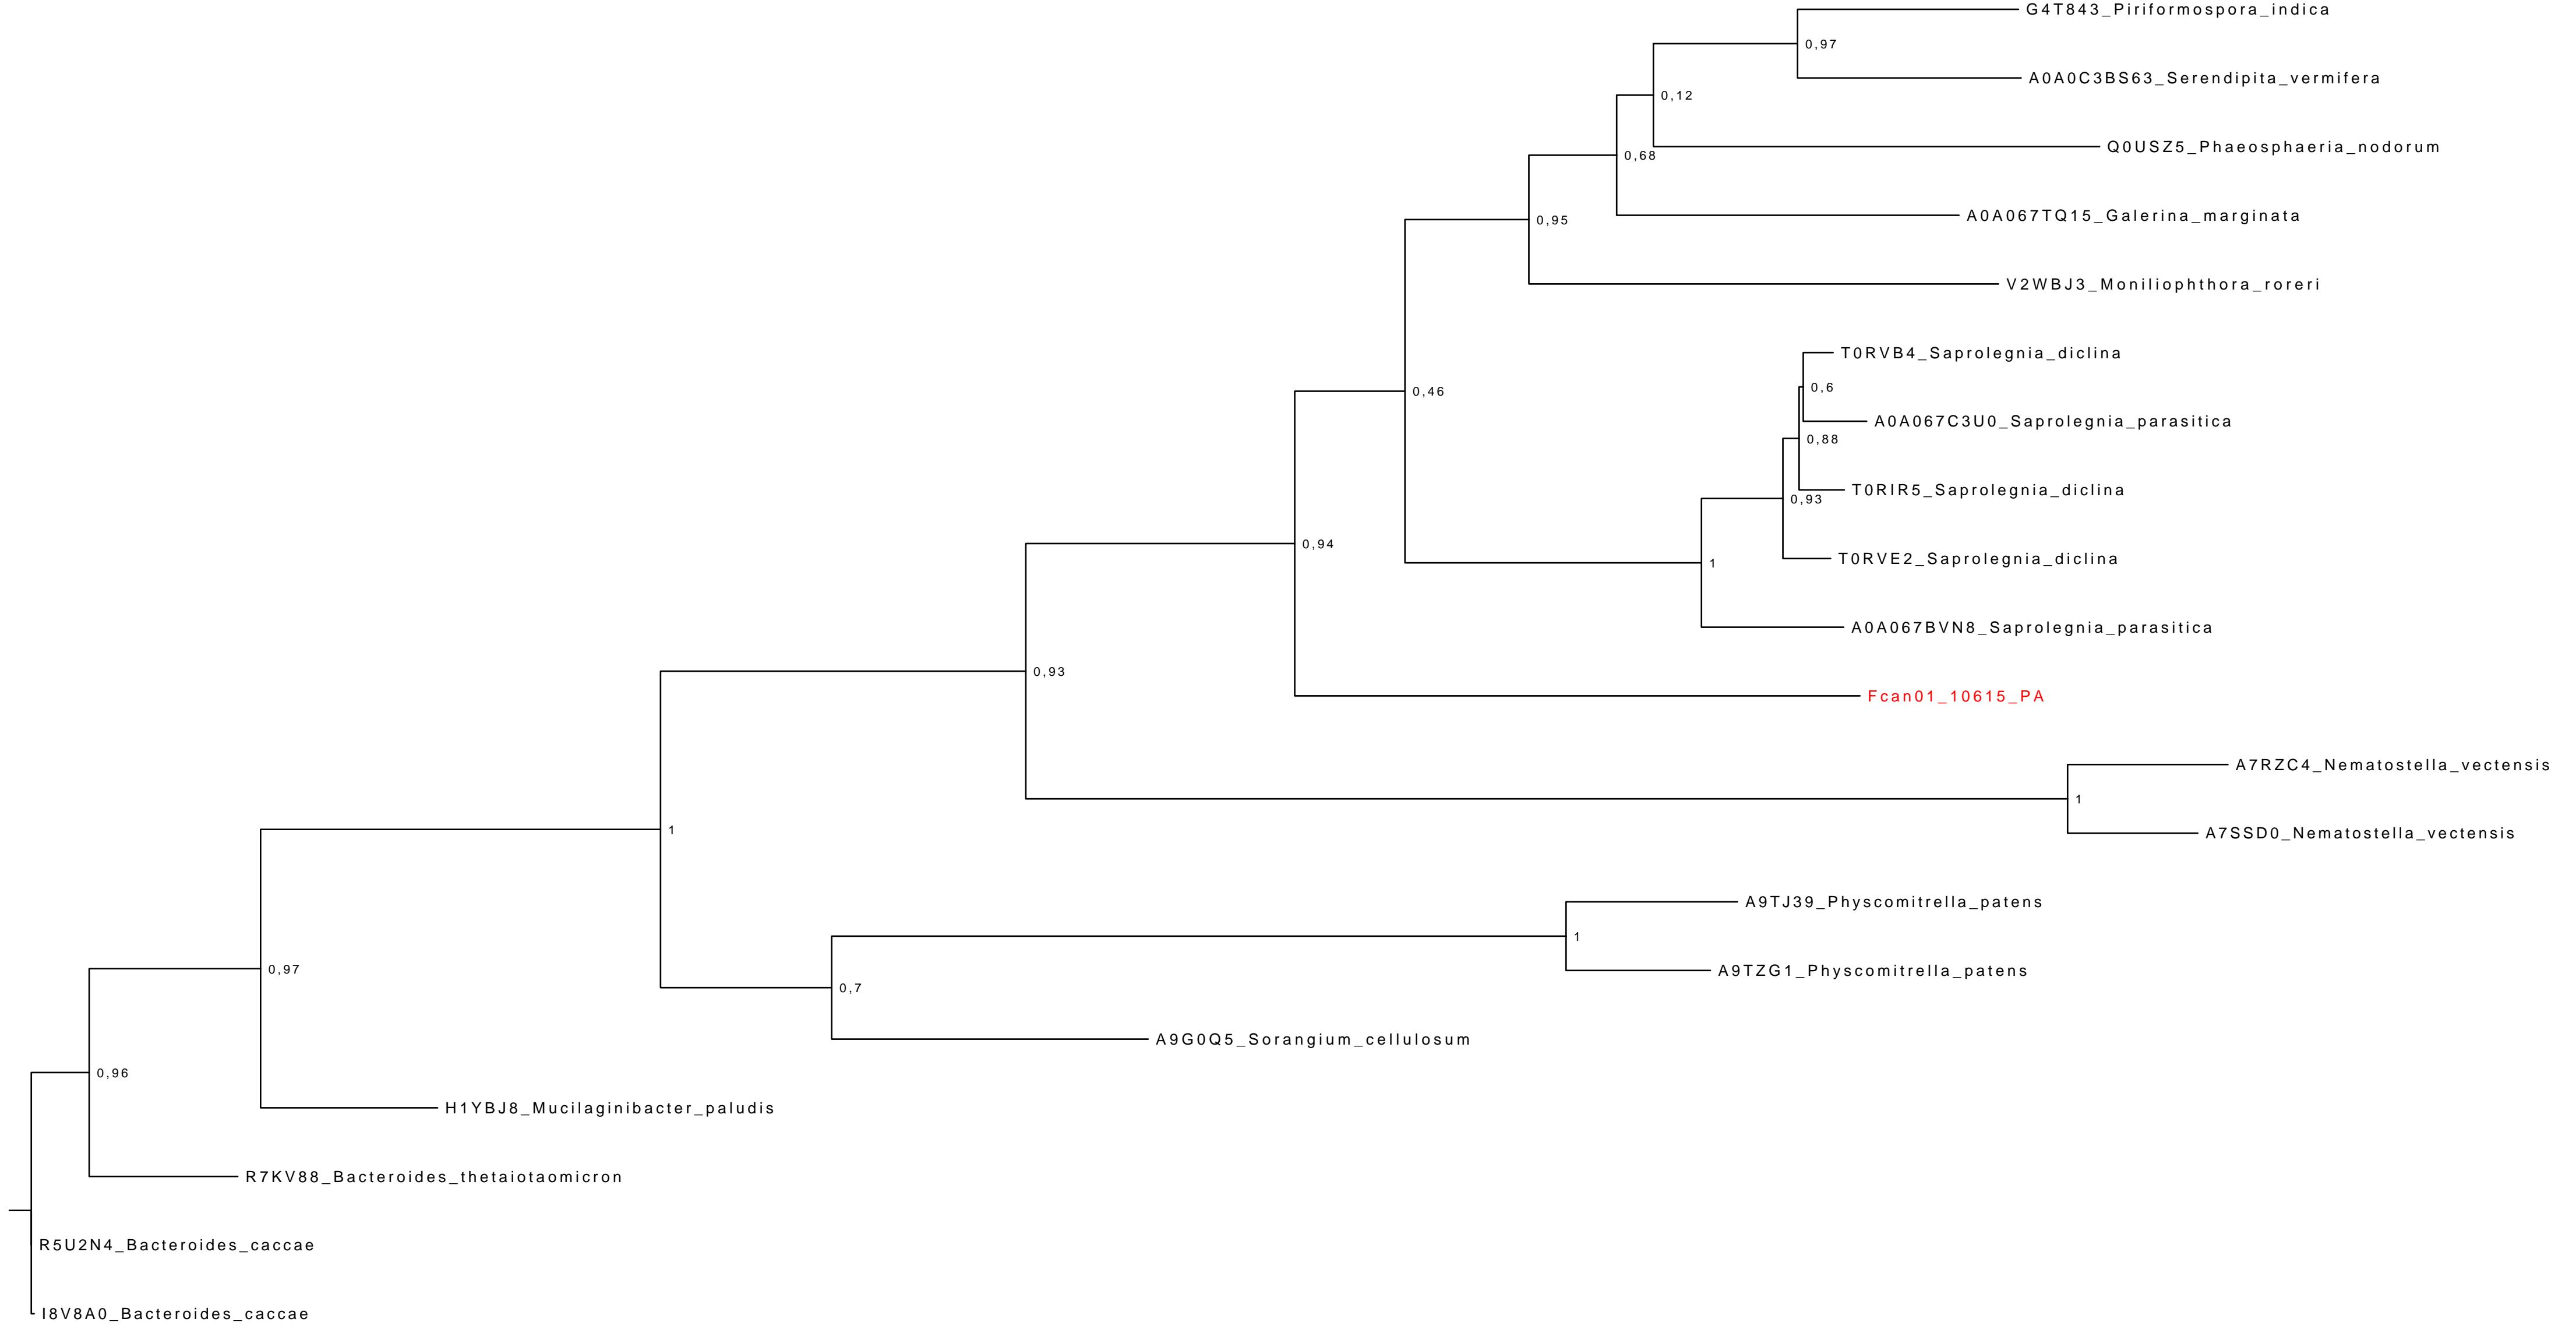



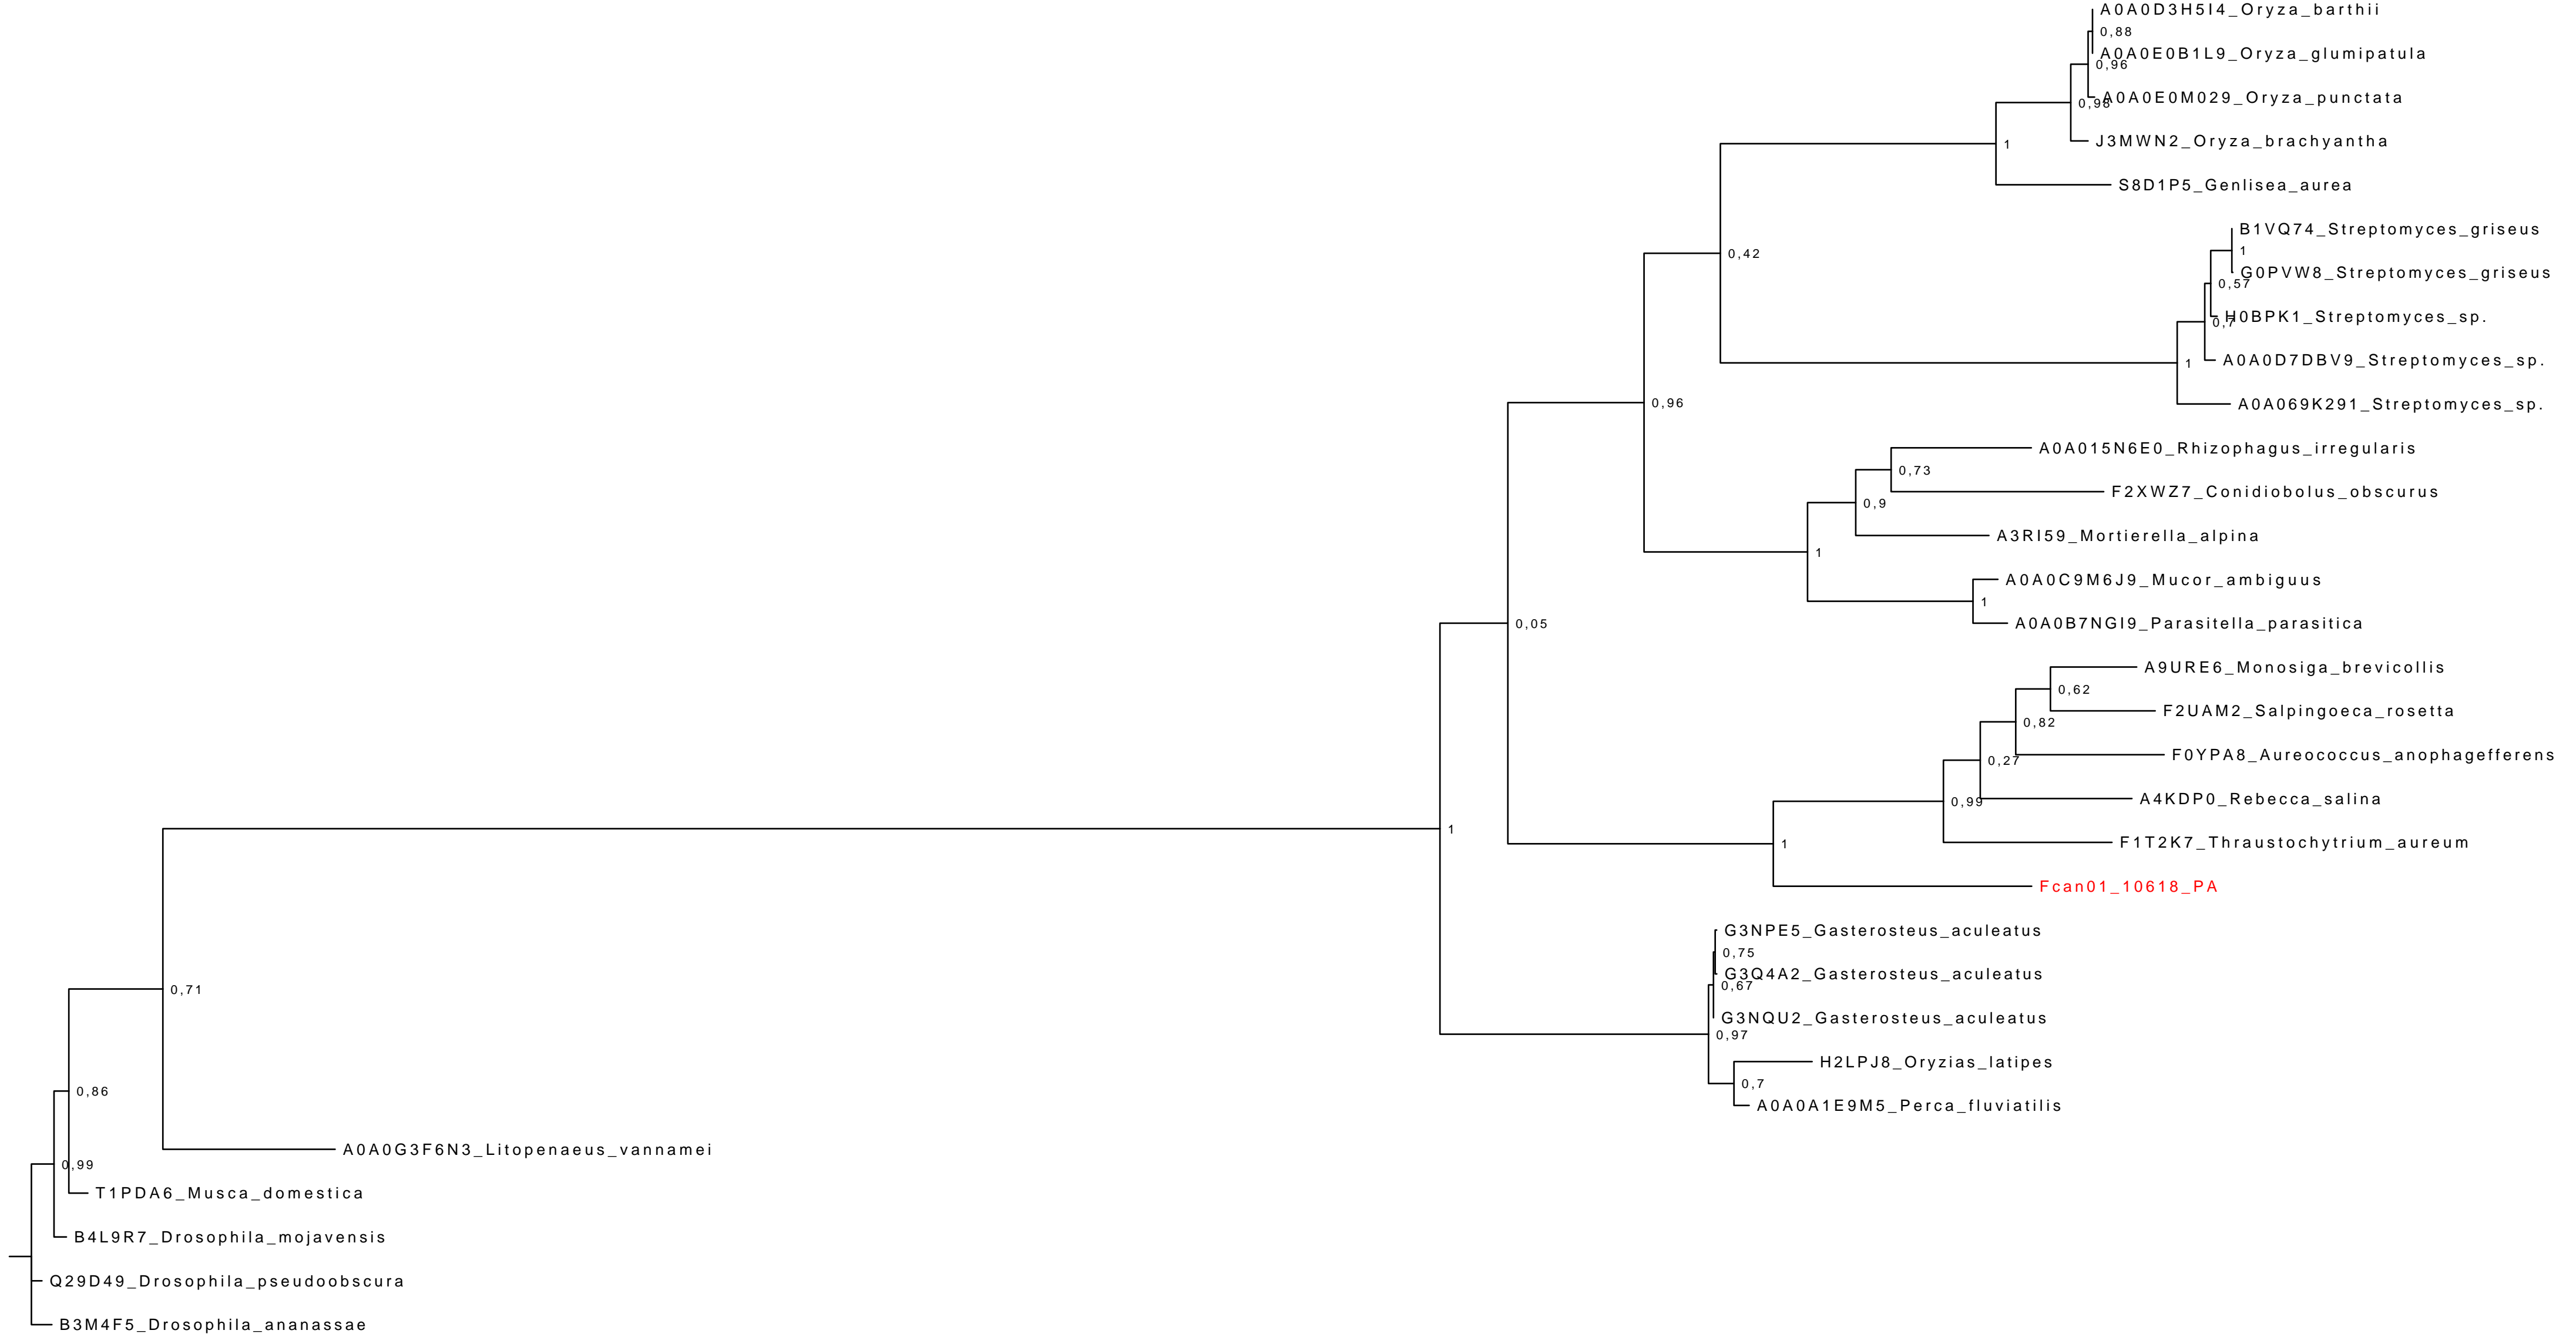

0.7

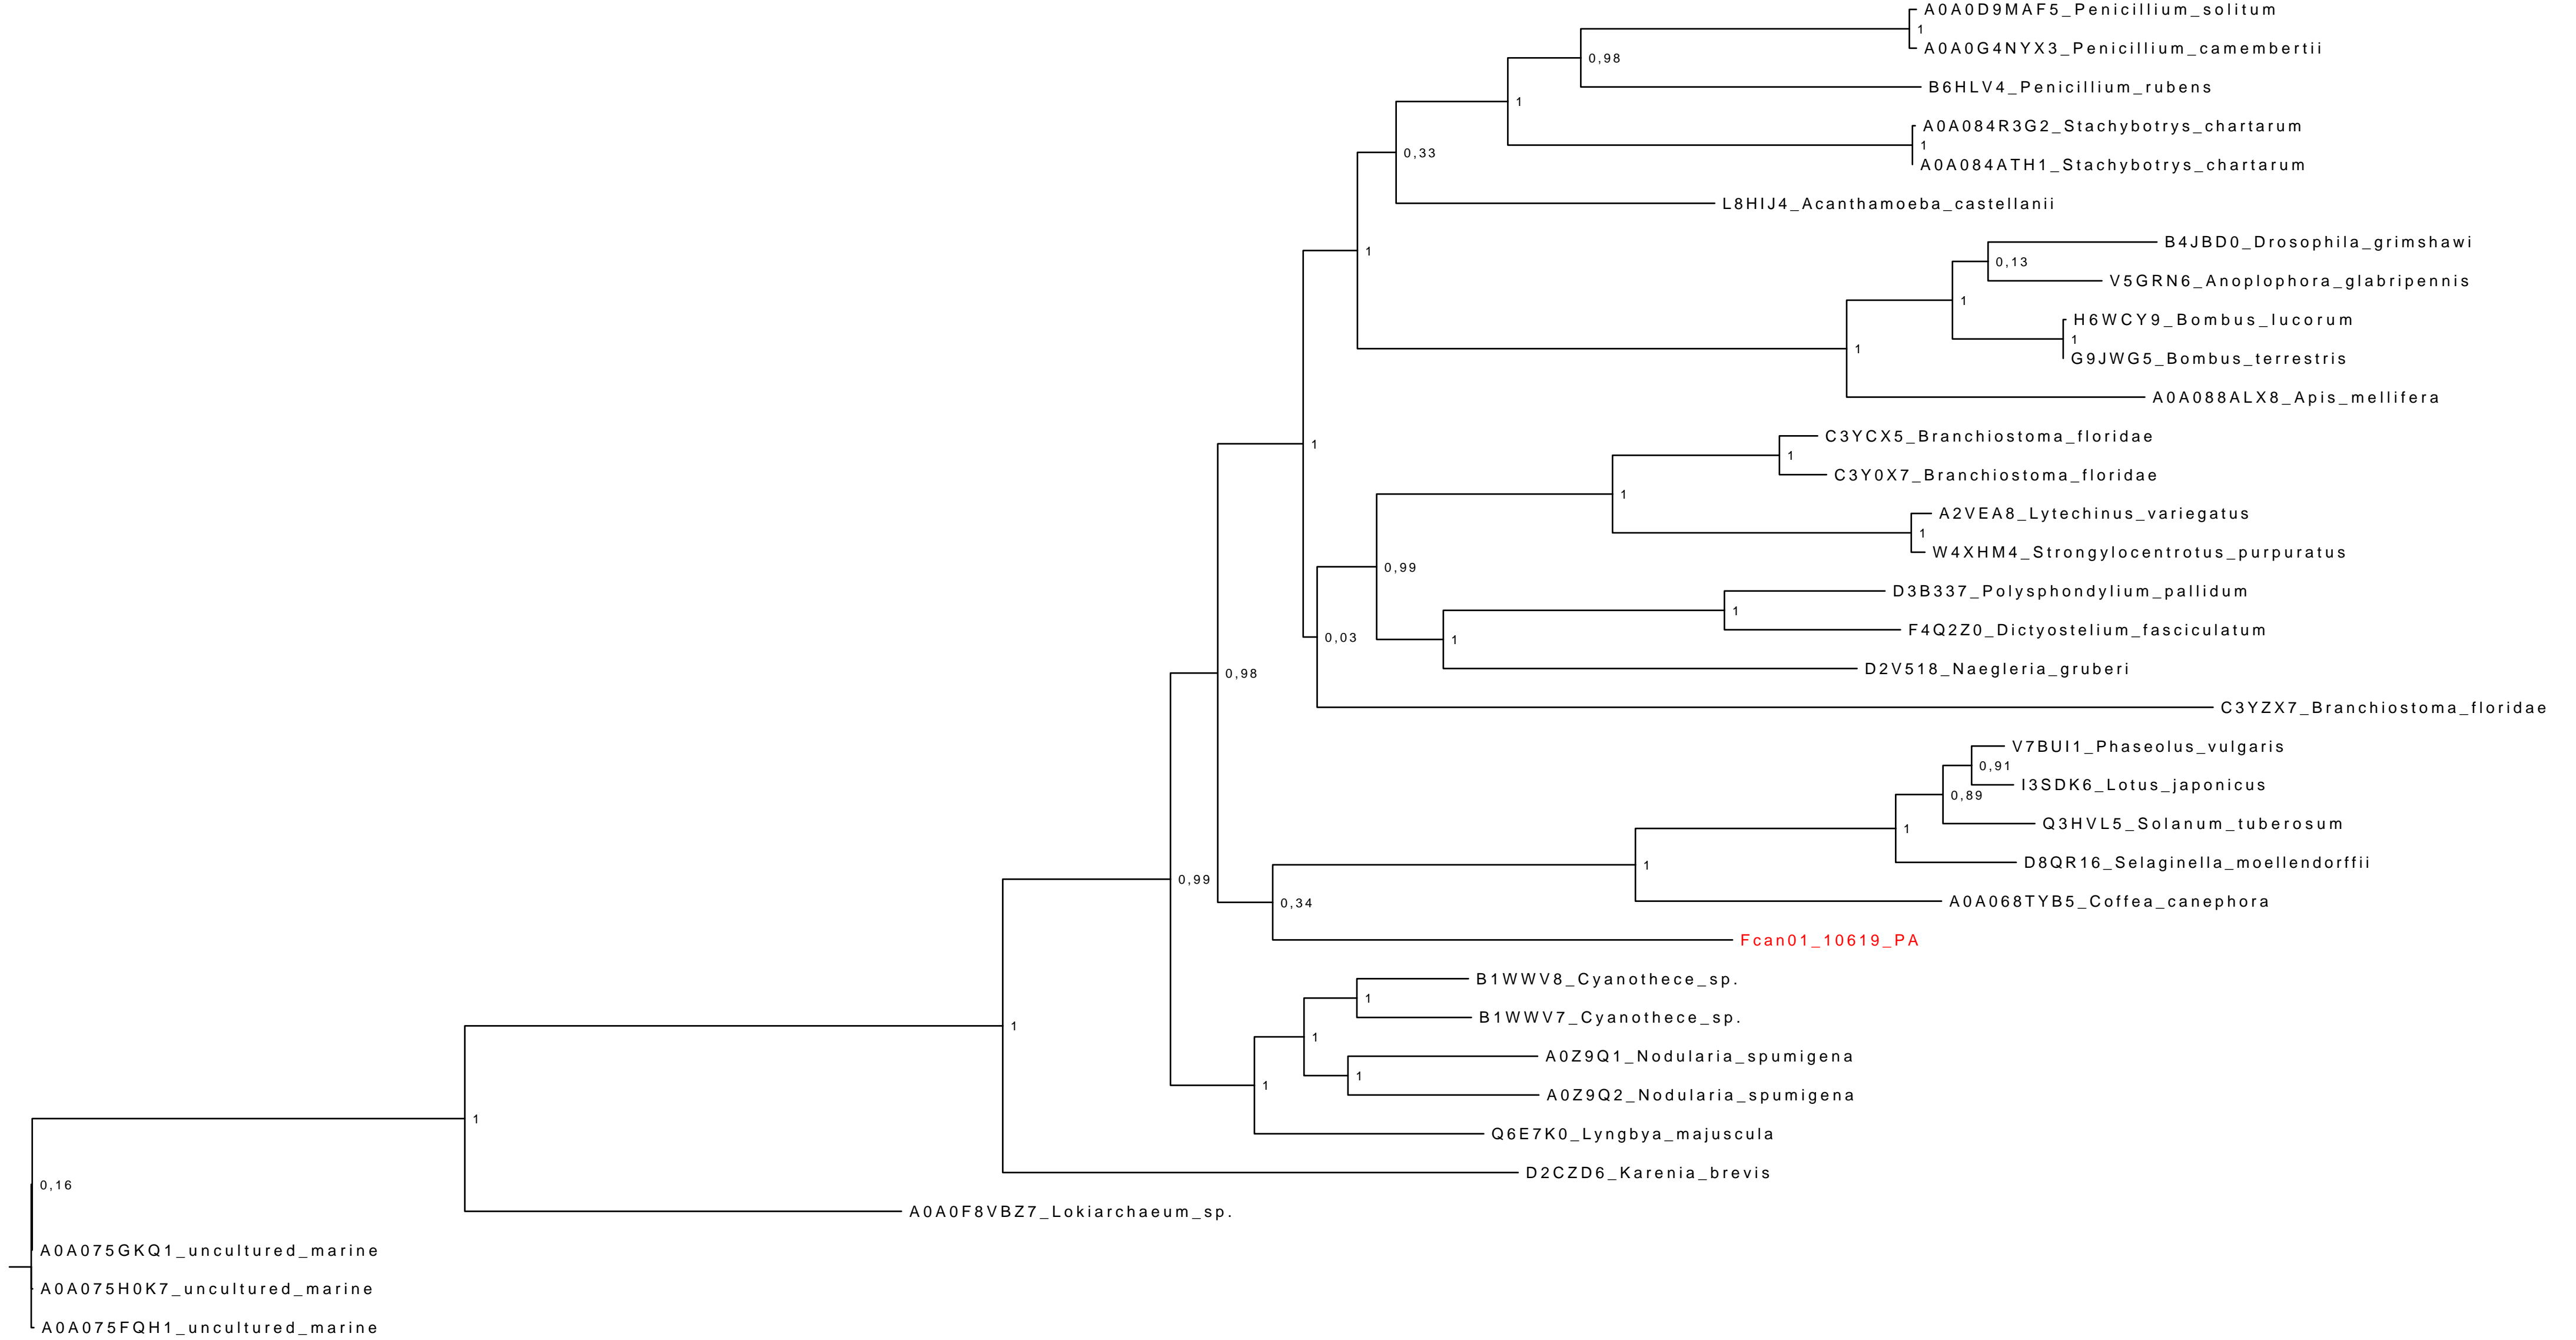

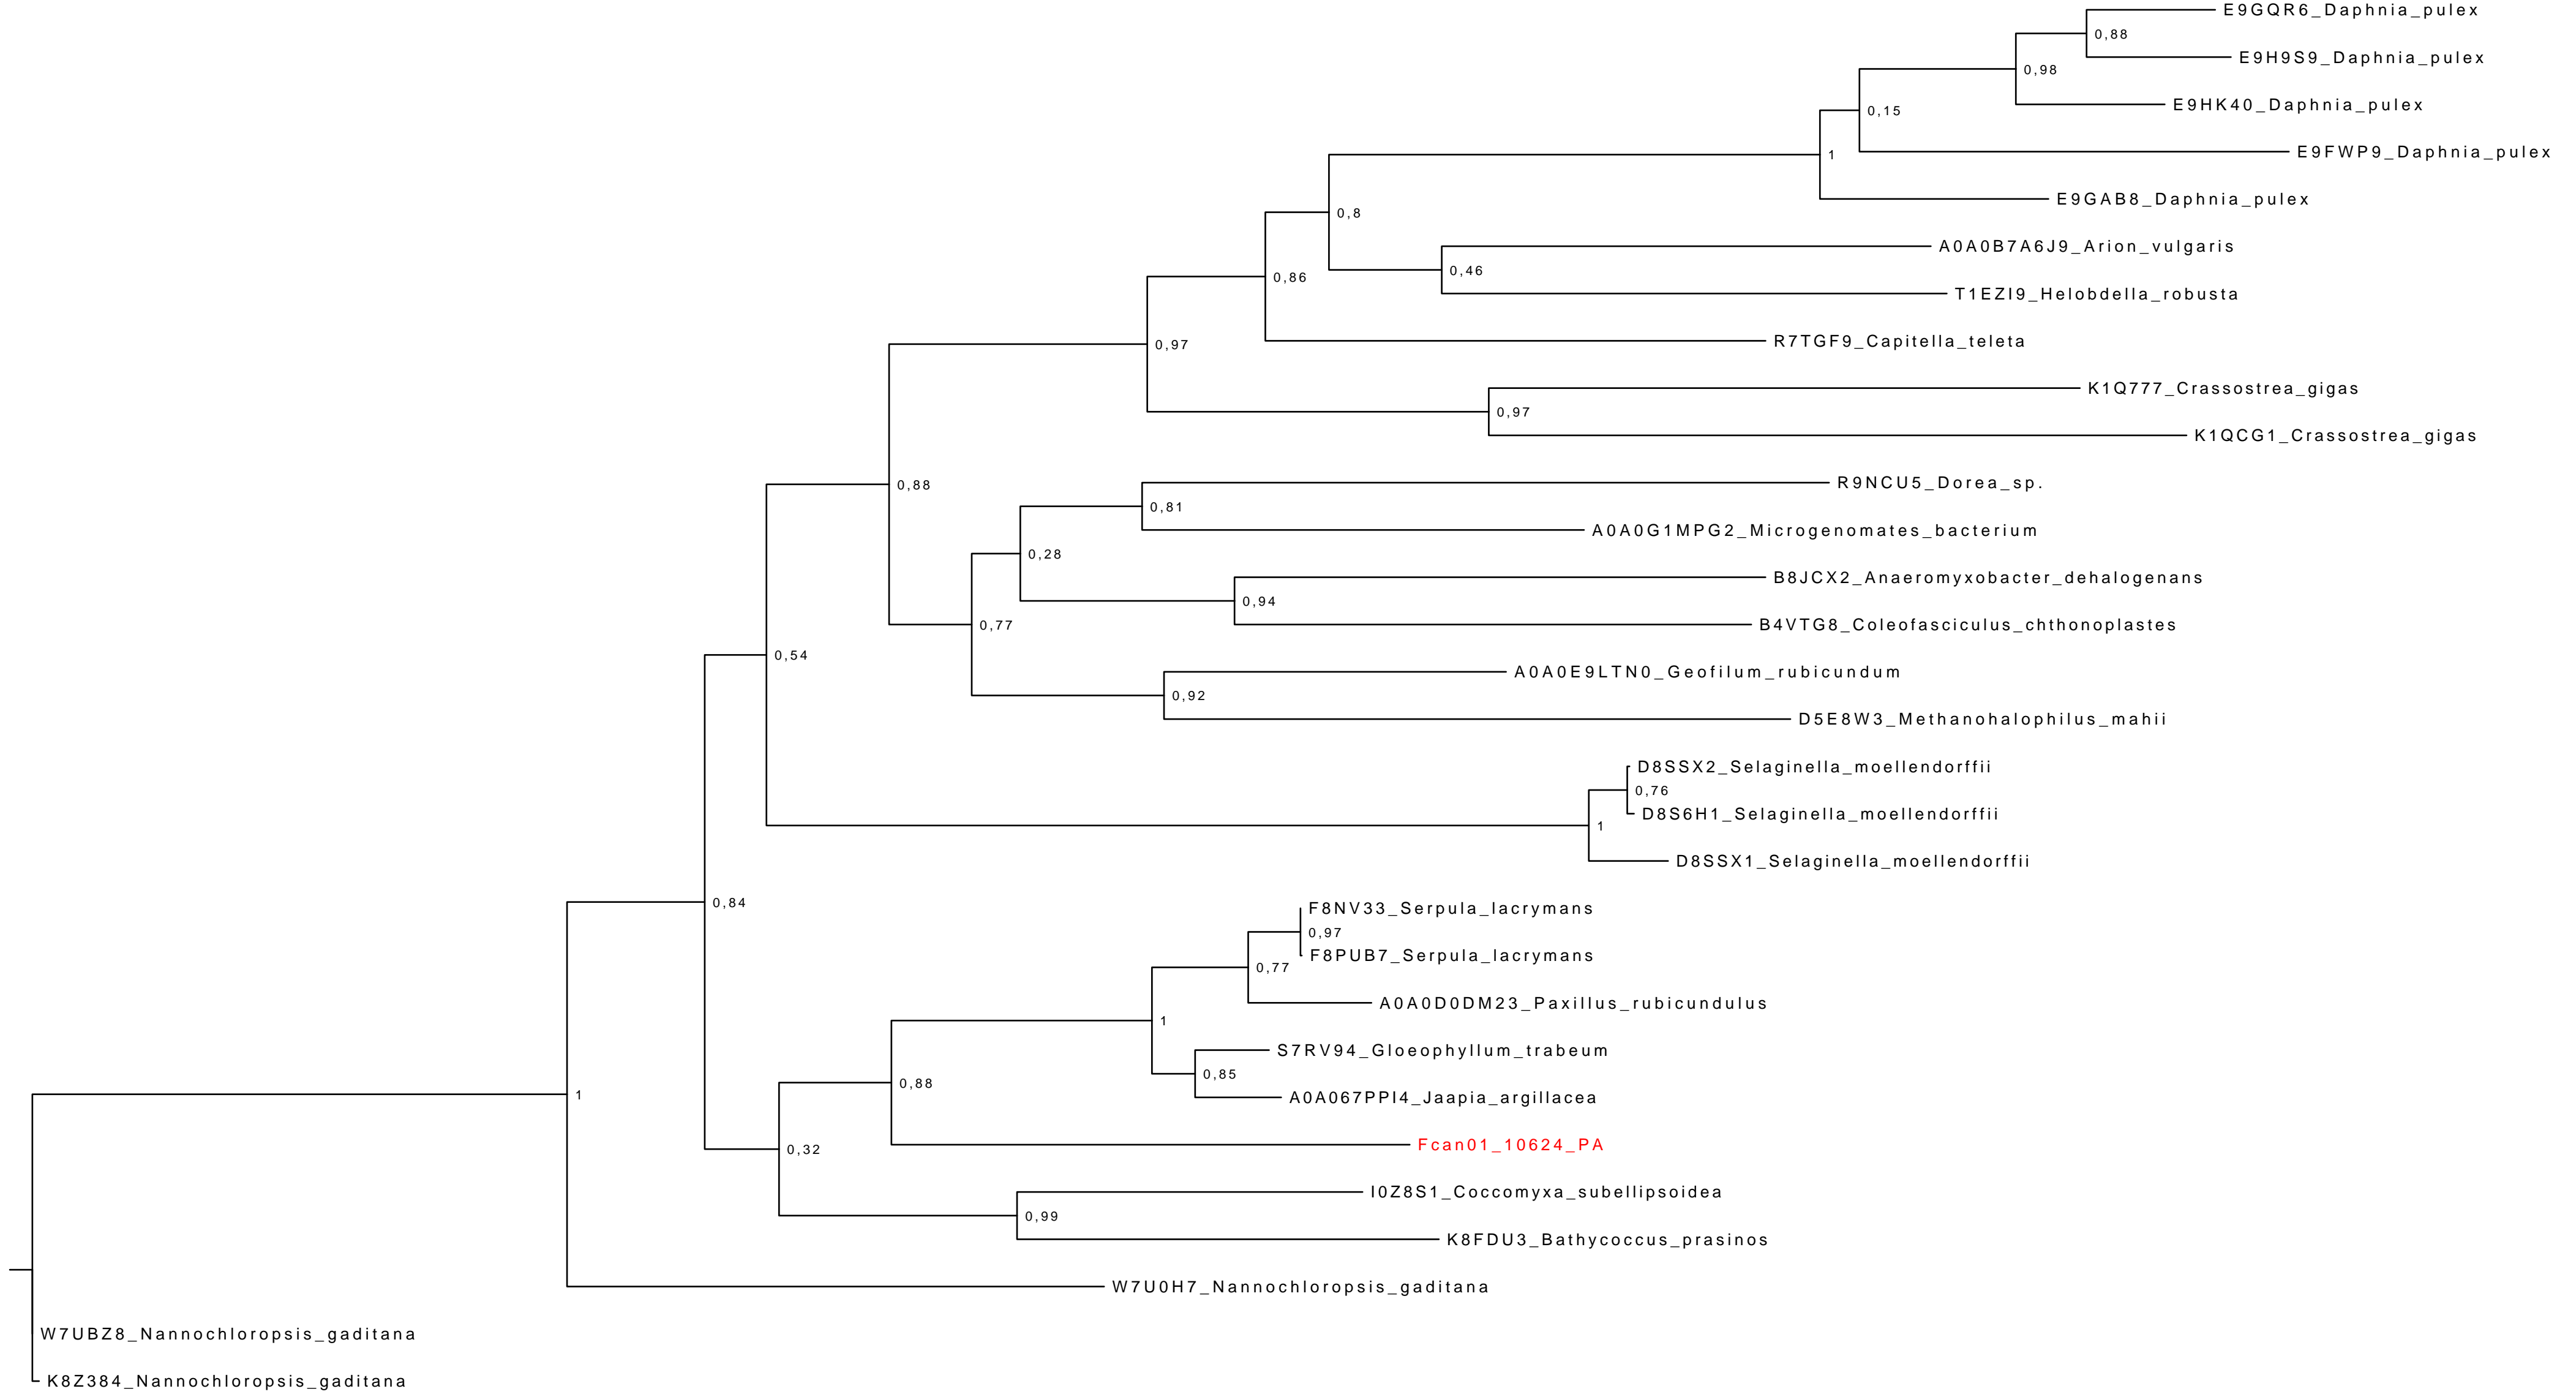

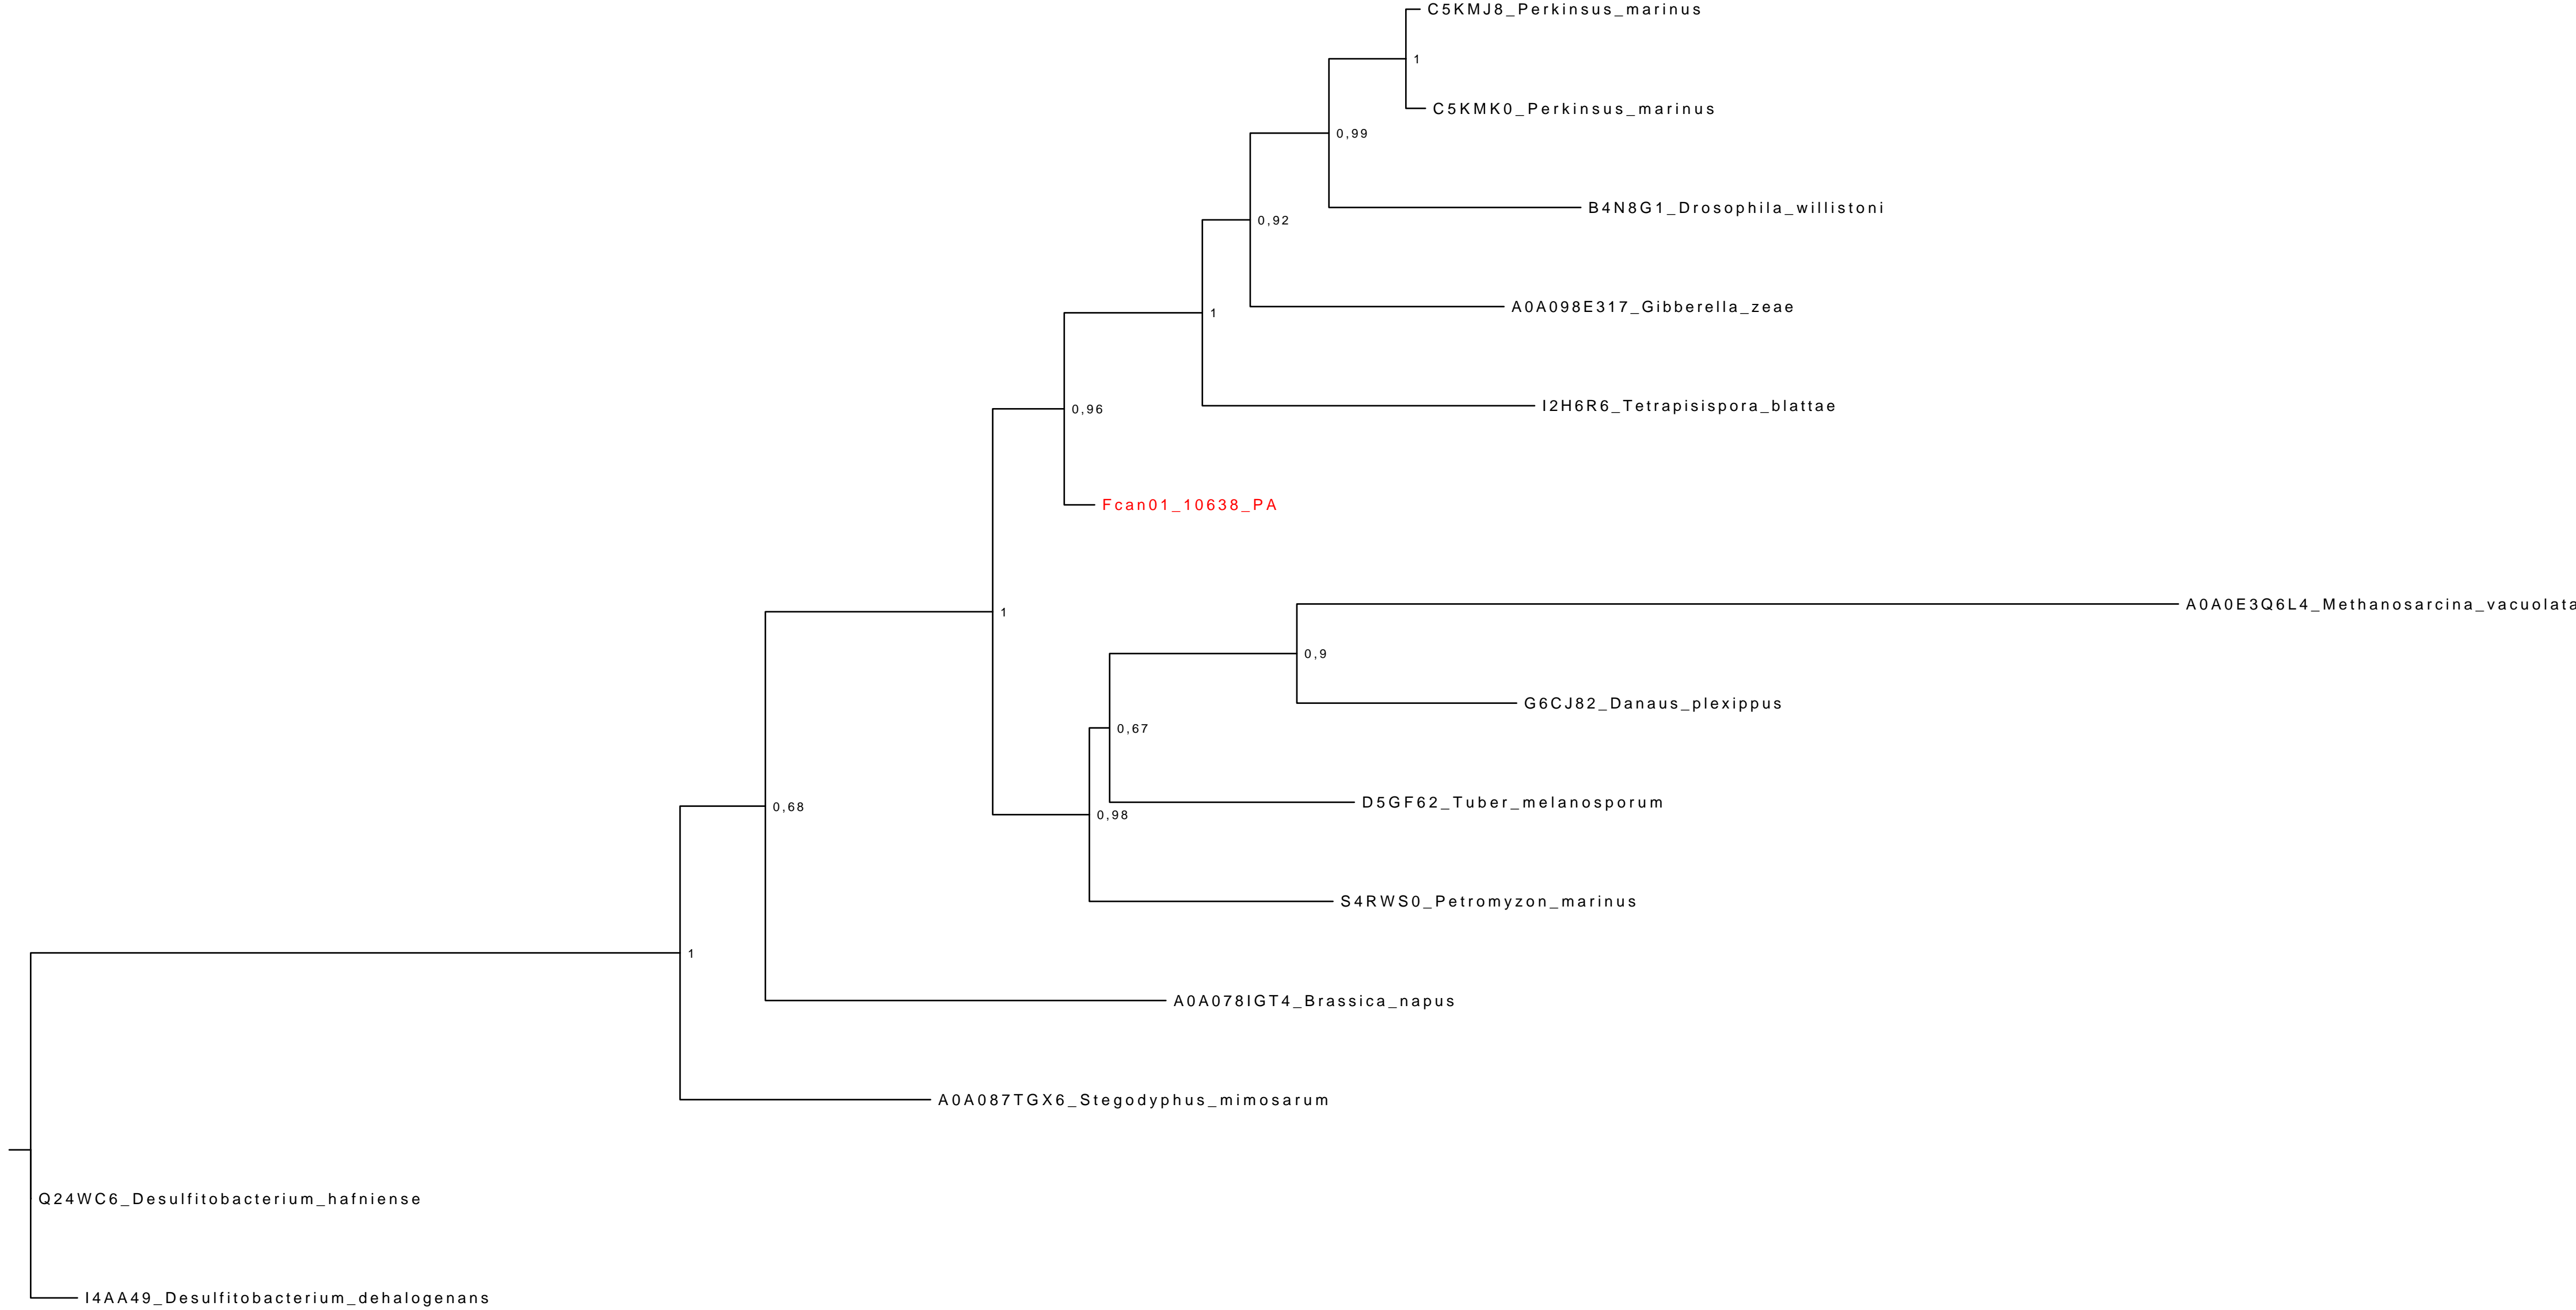

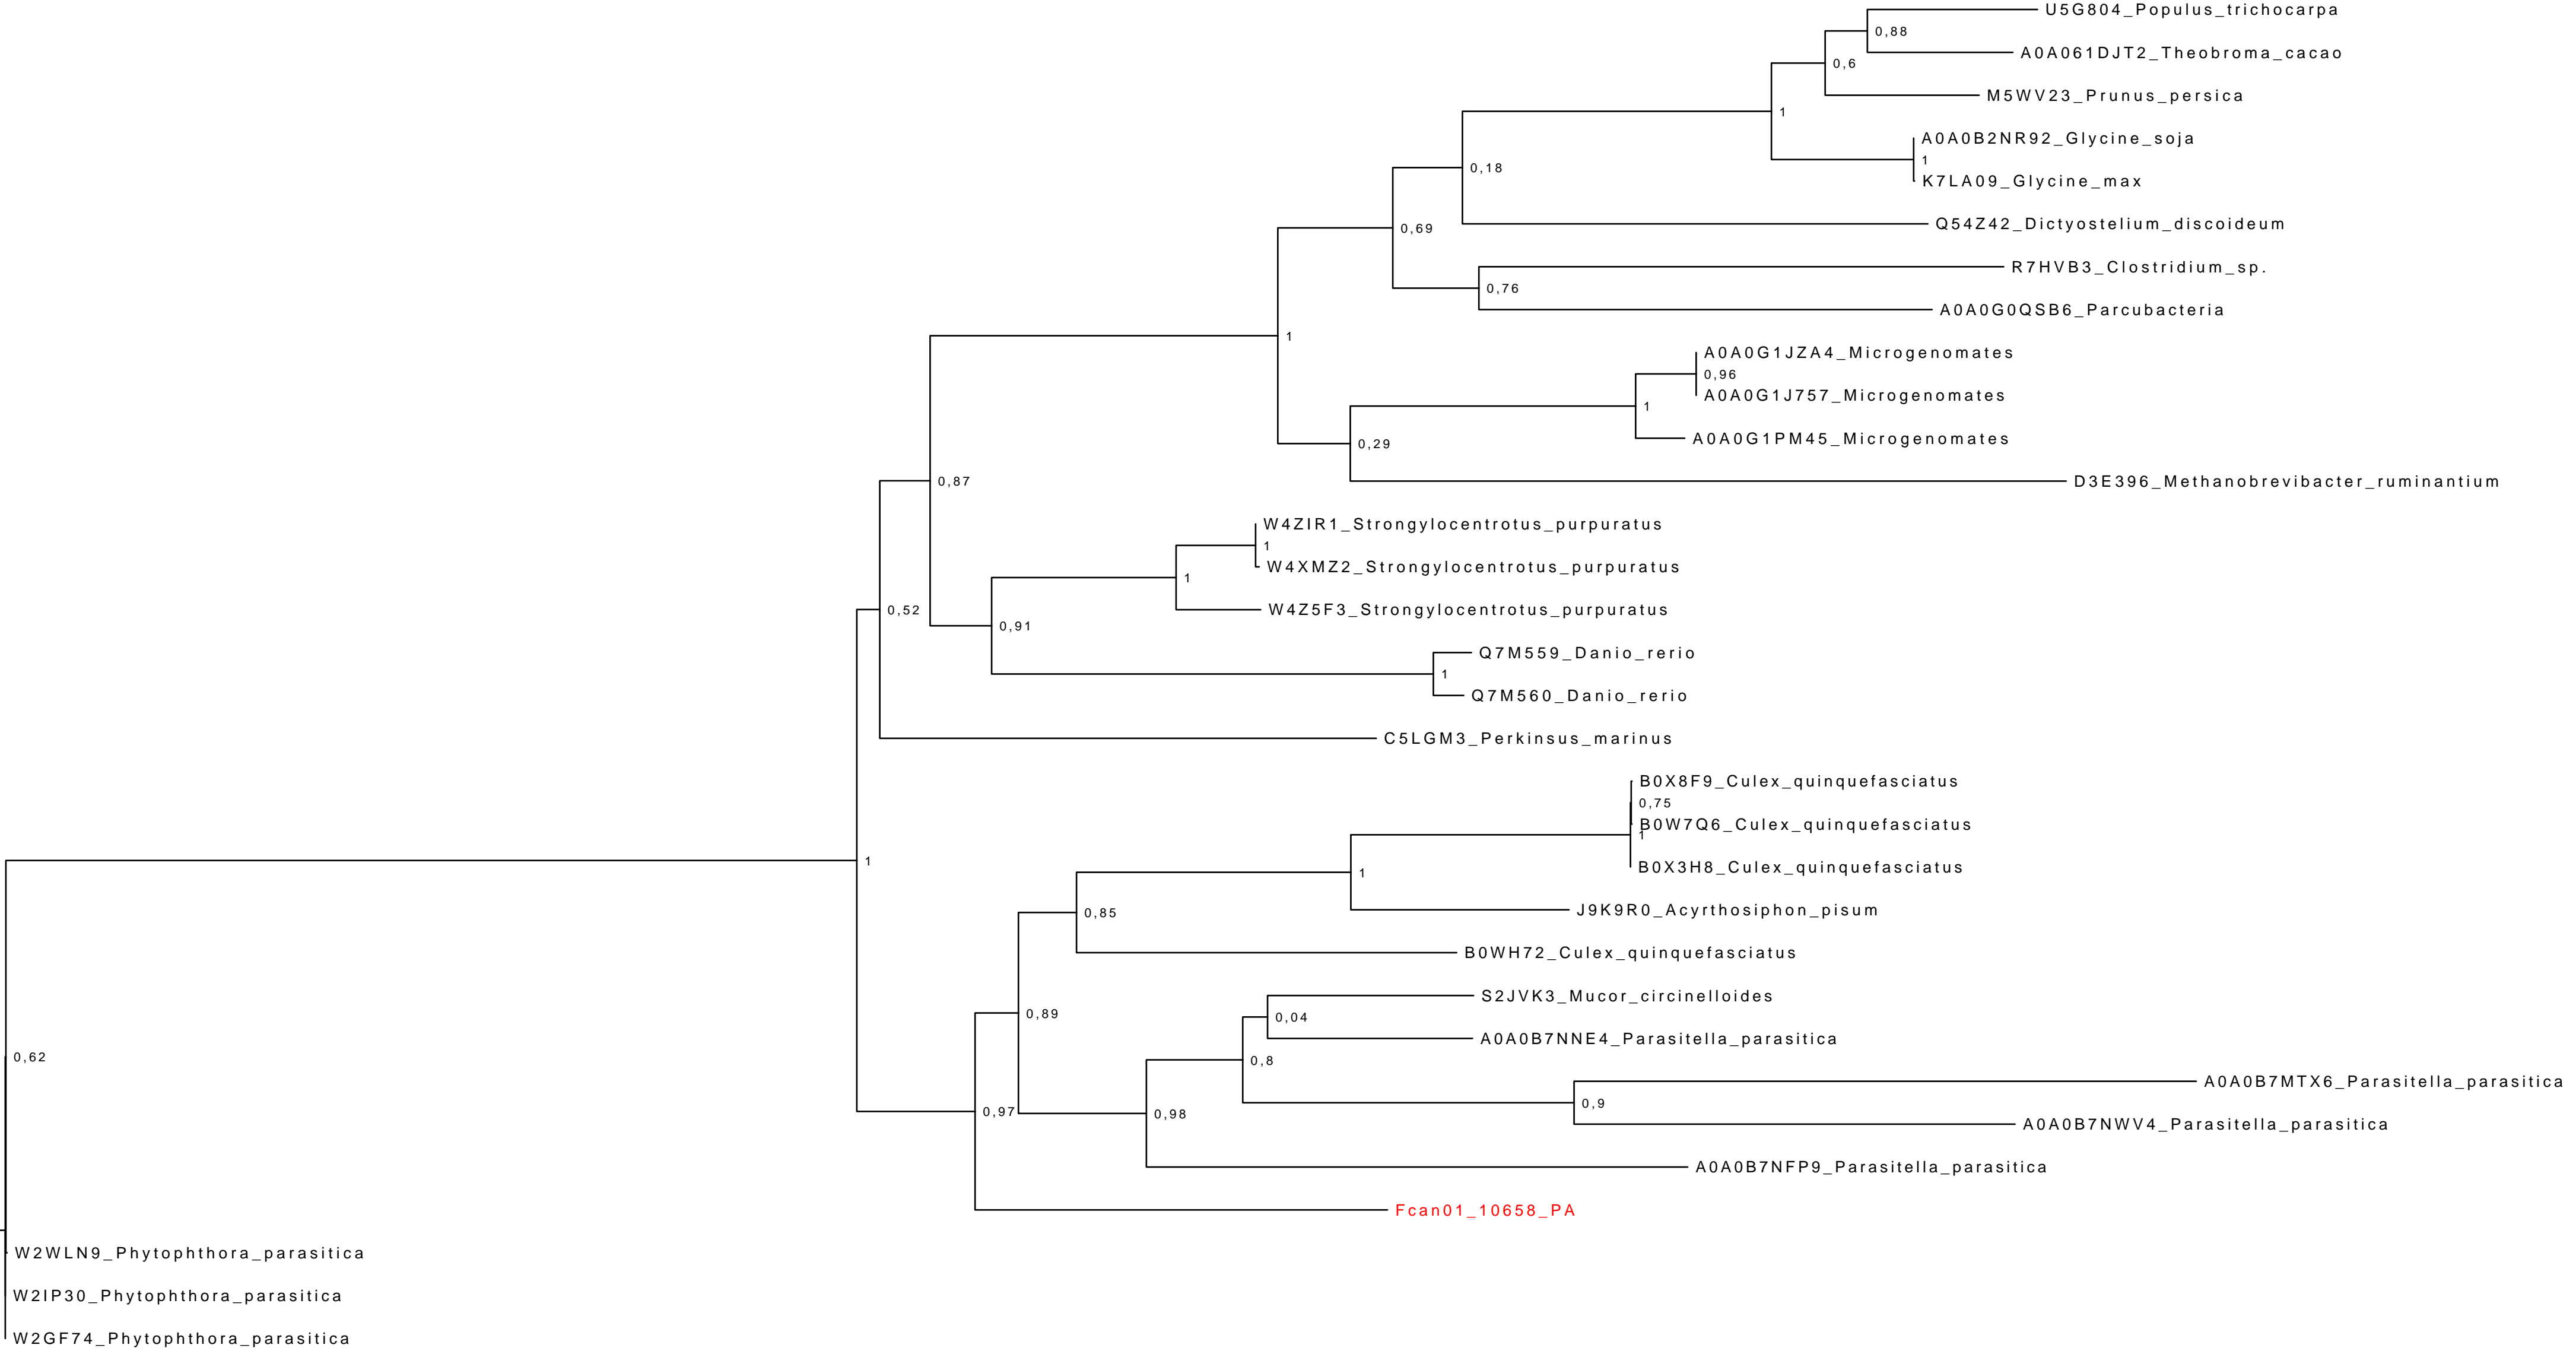

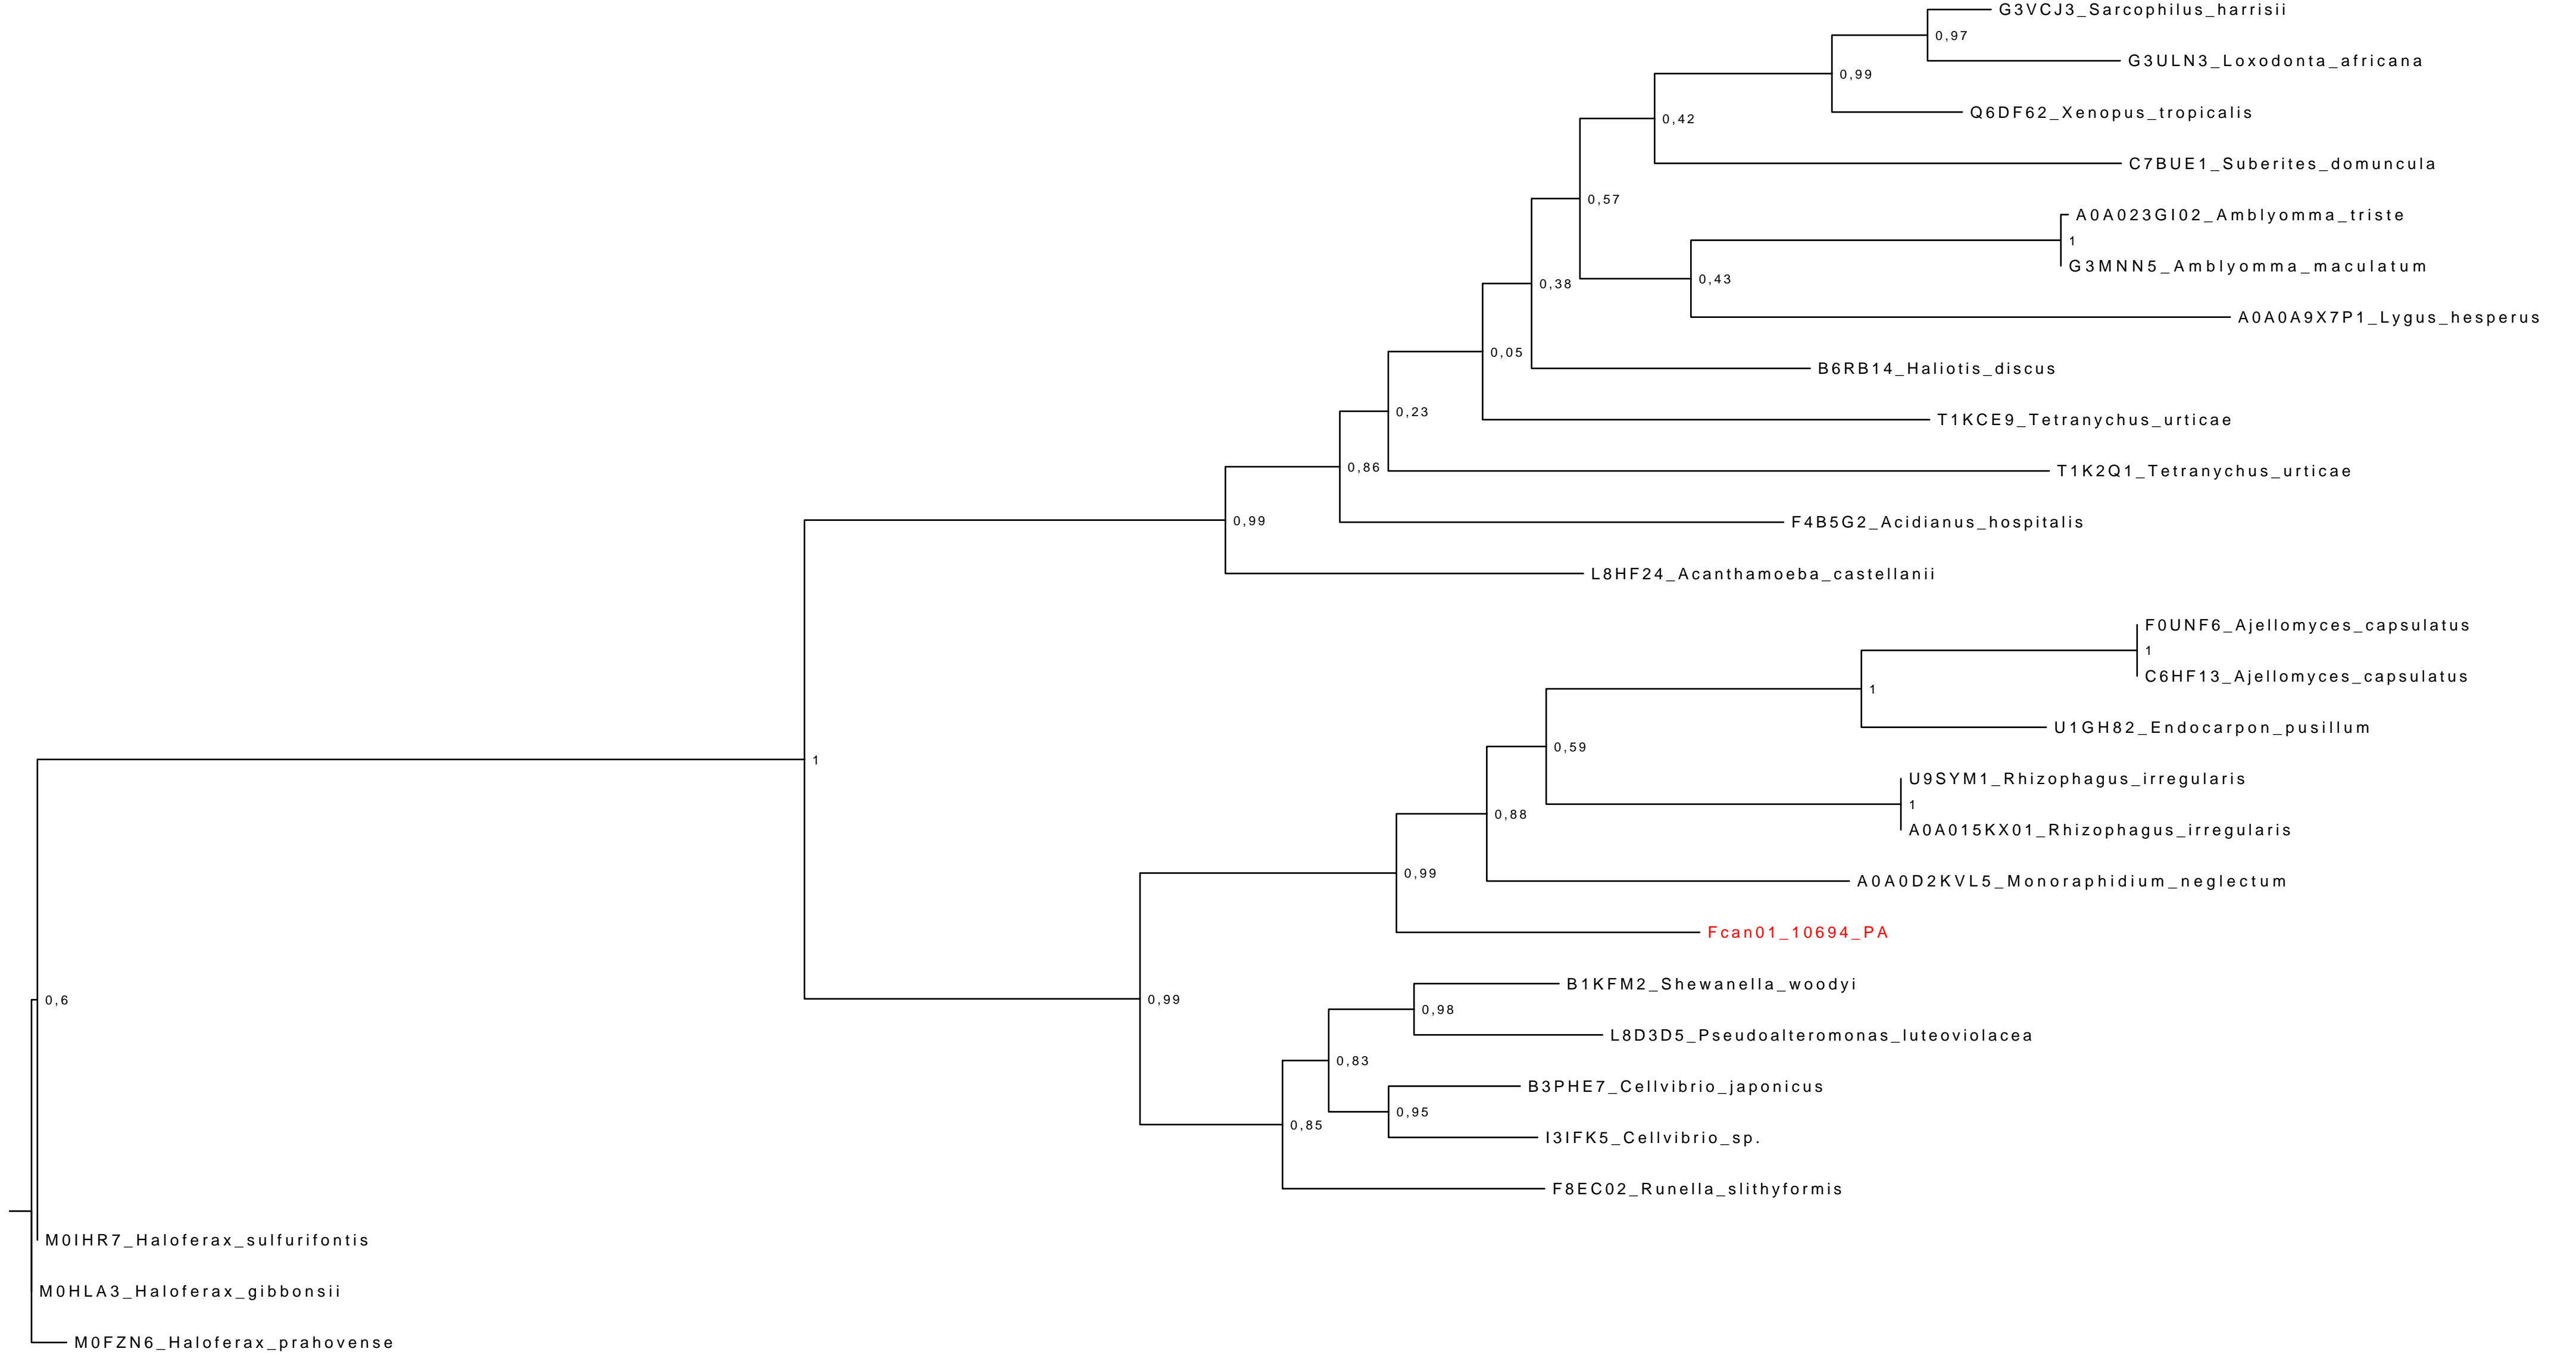

0.5

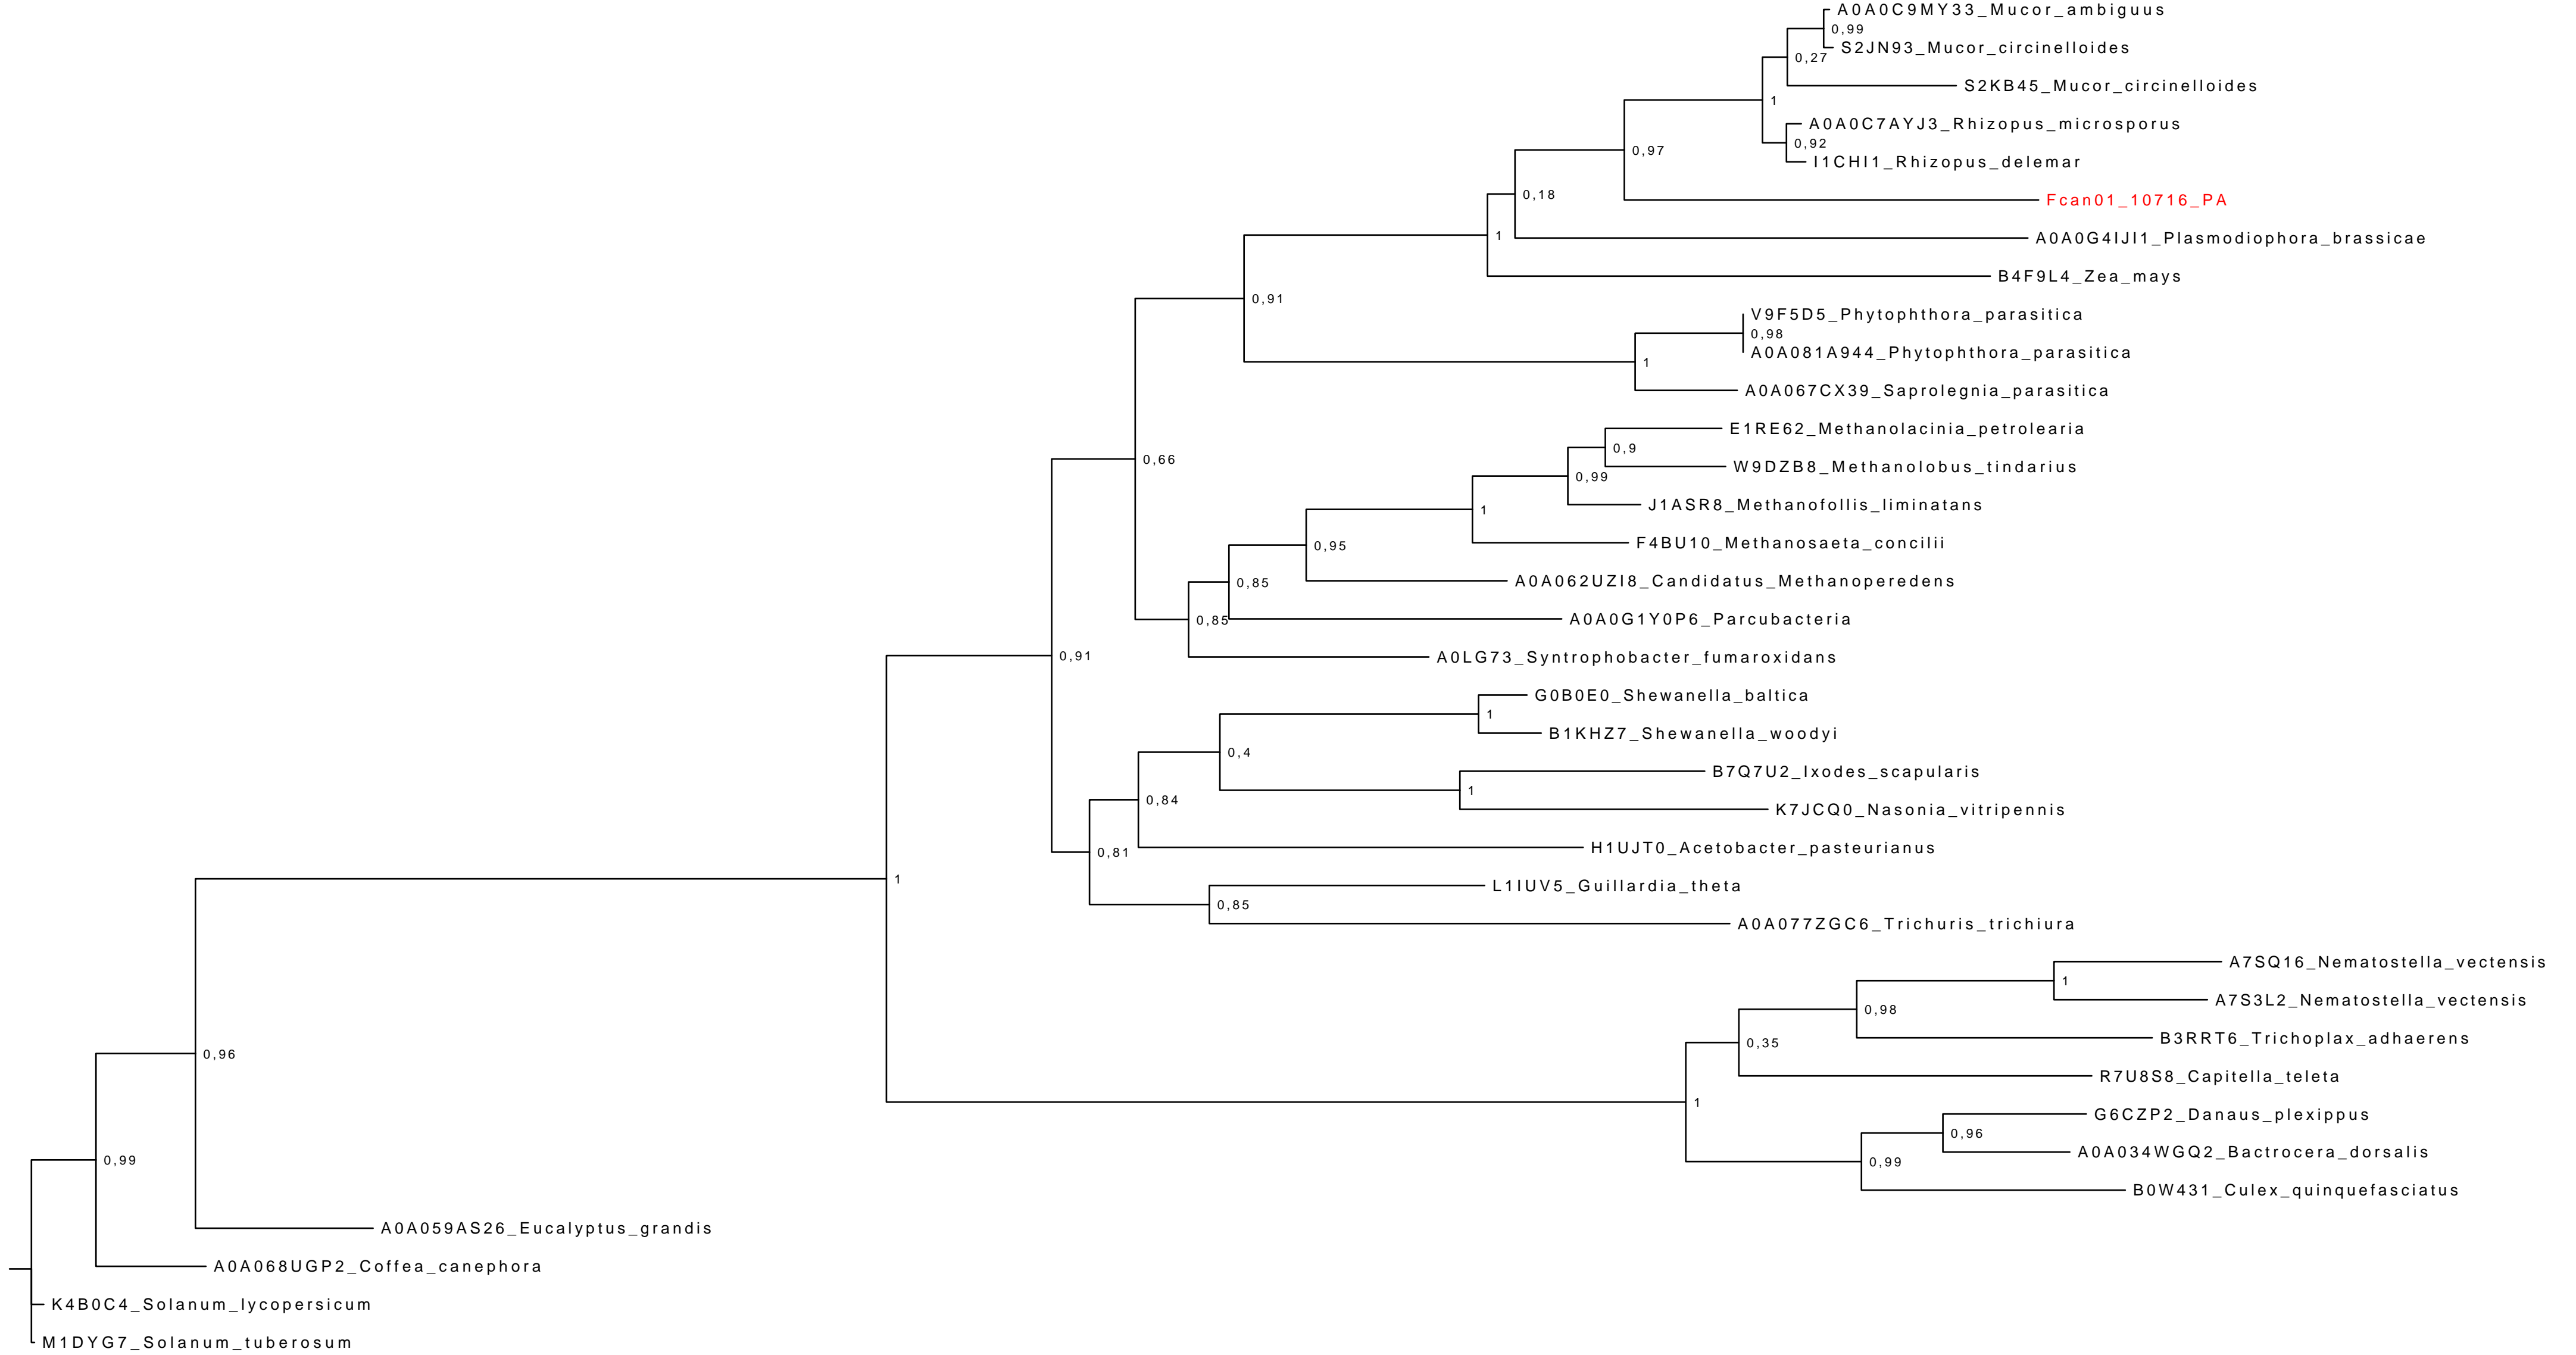

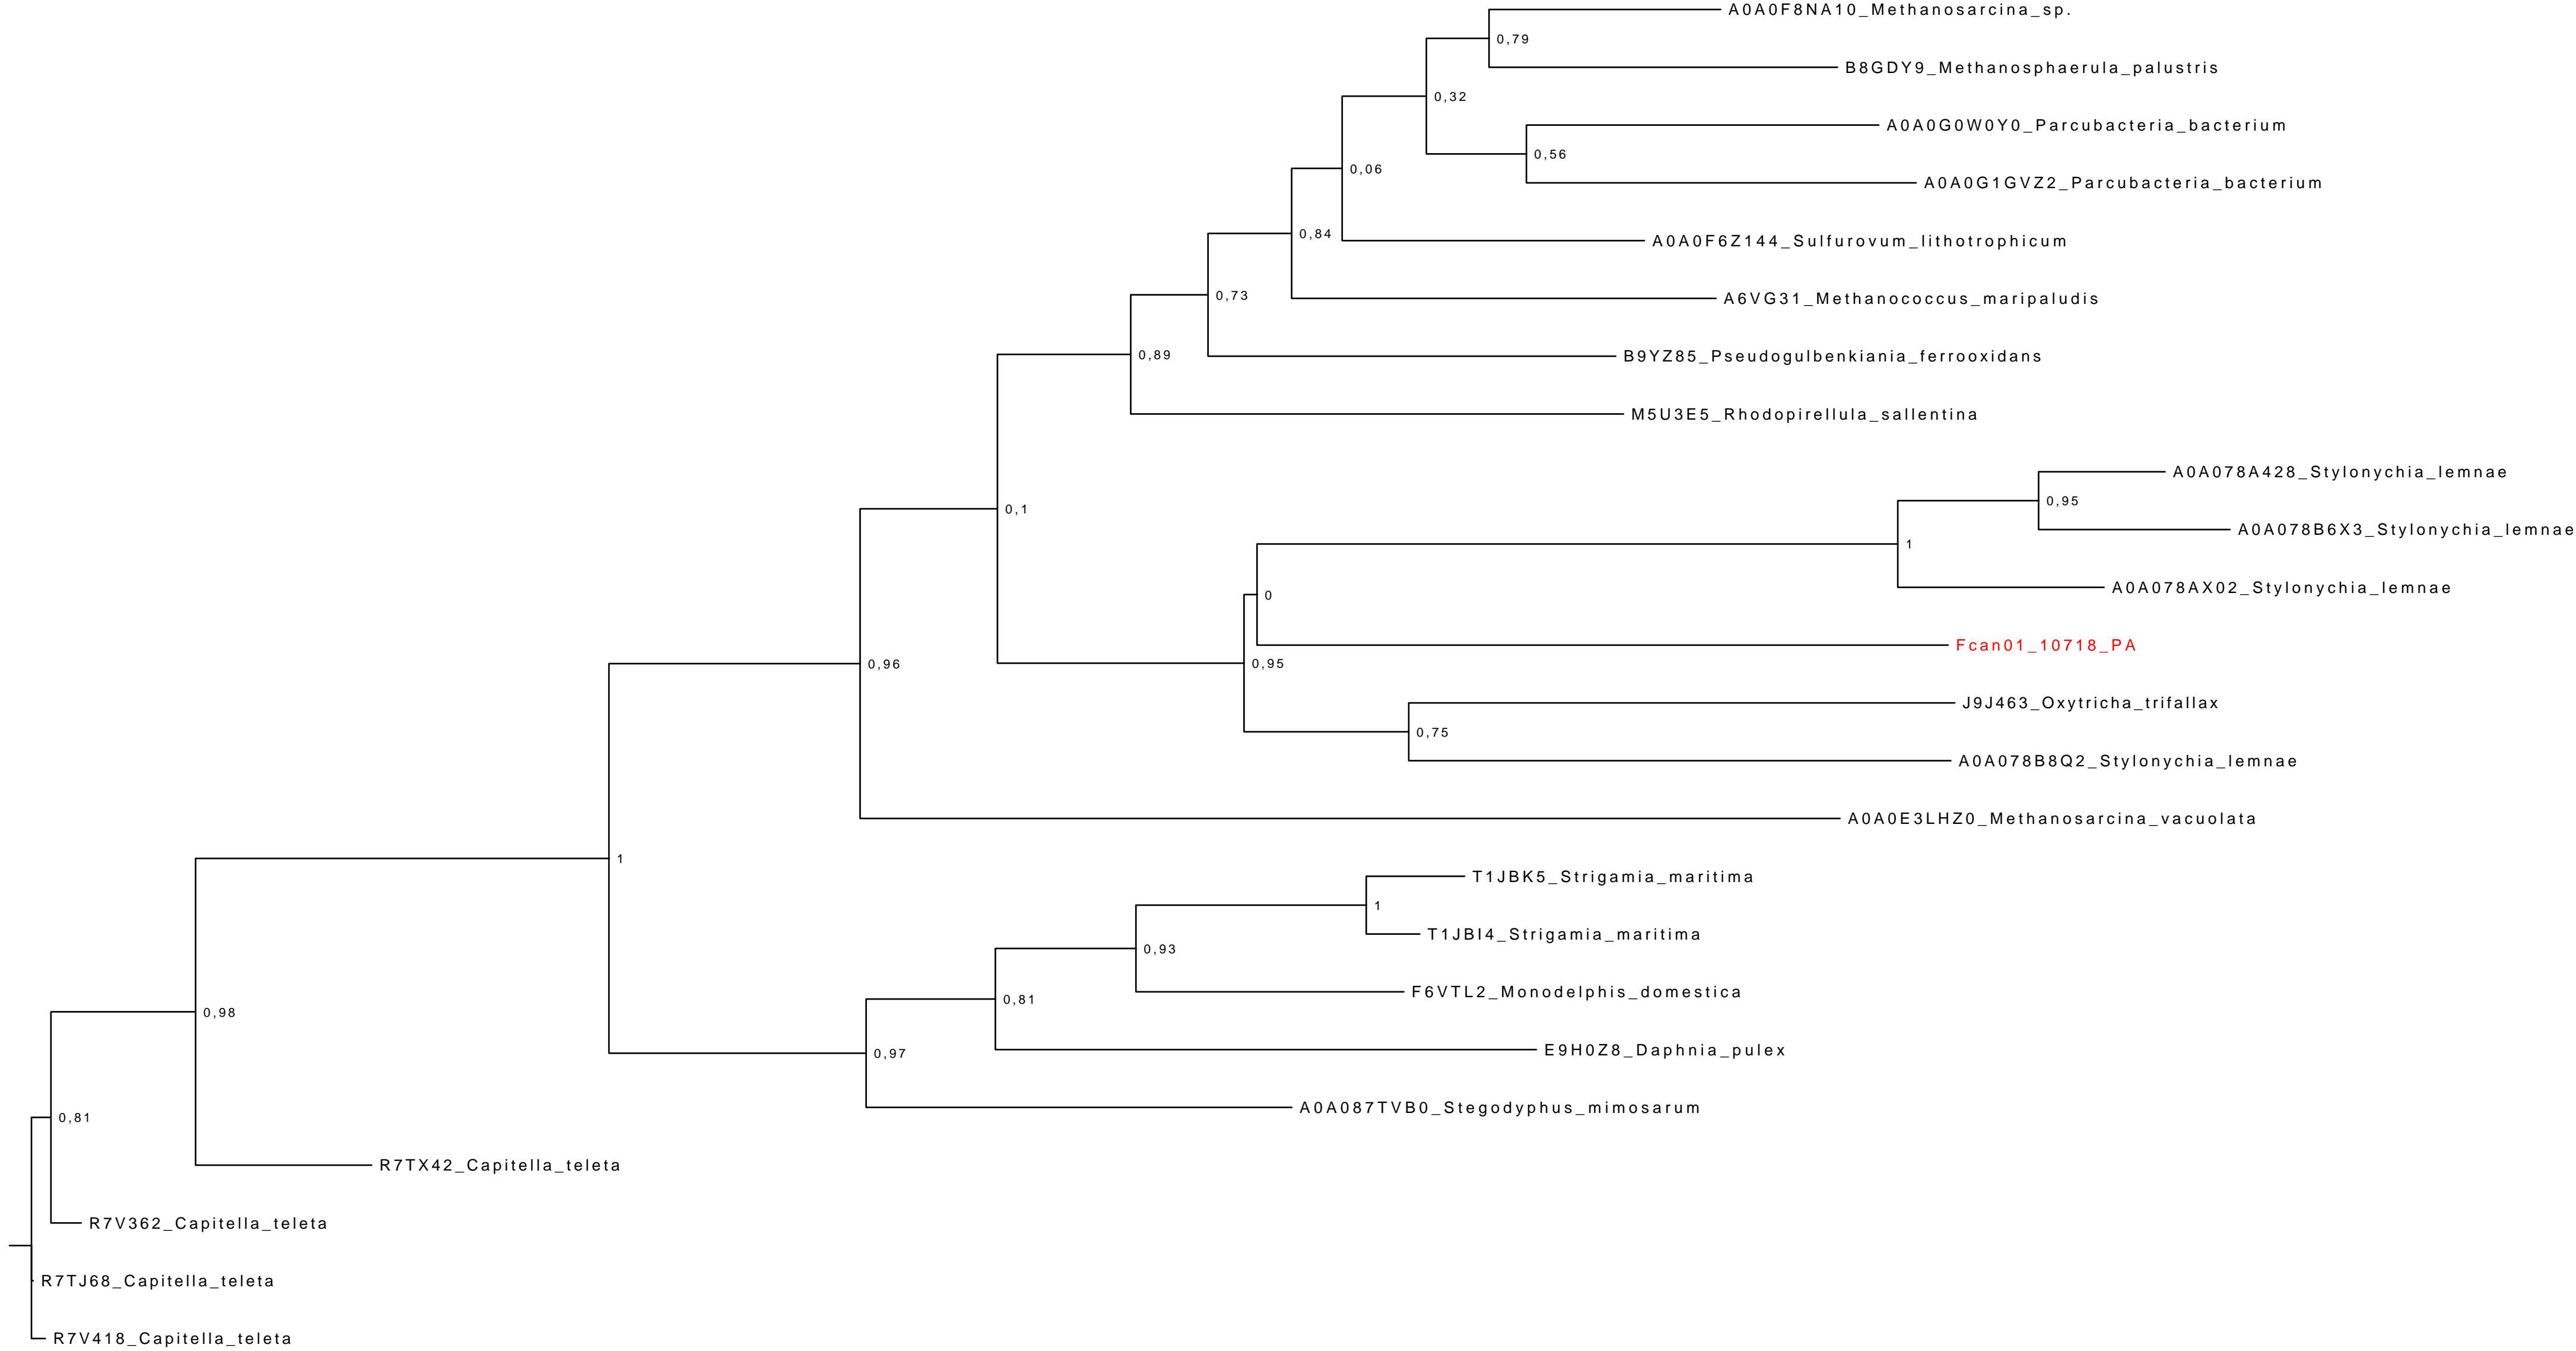

0.5



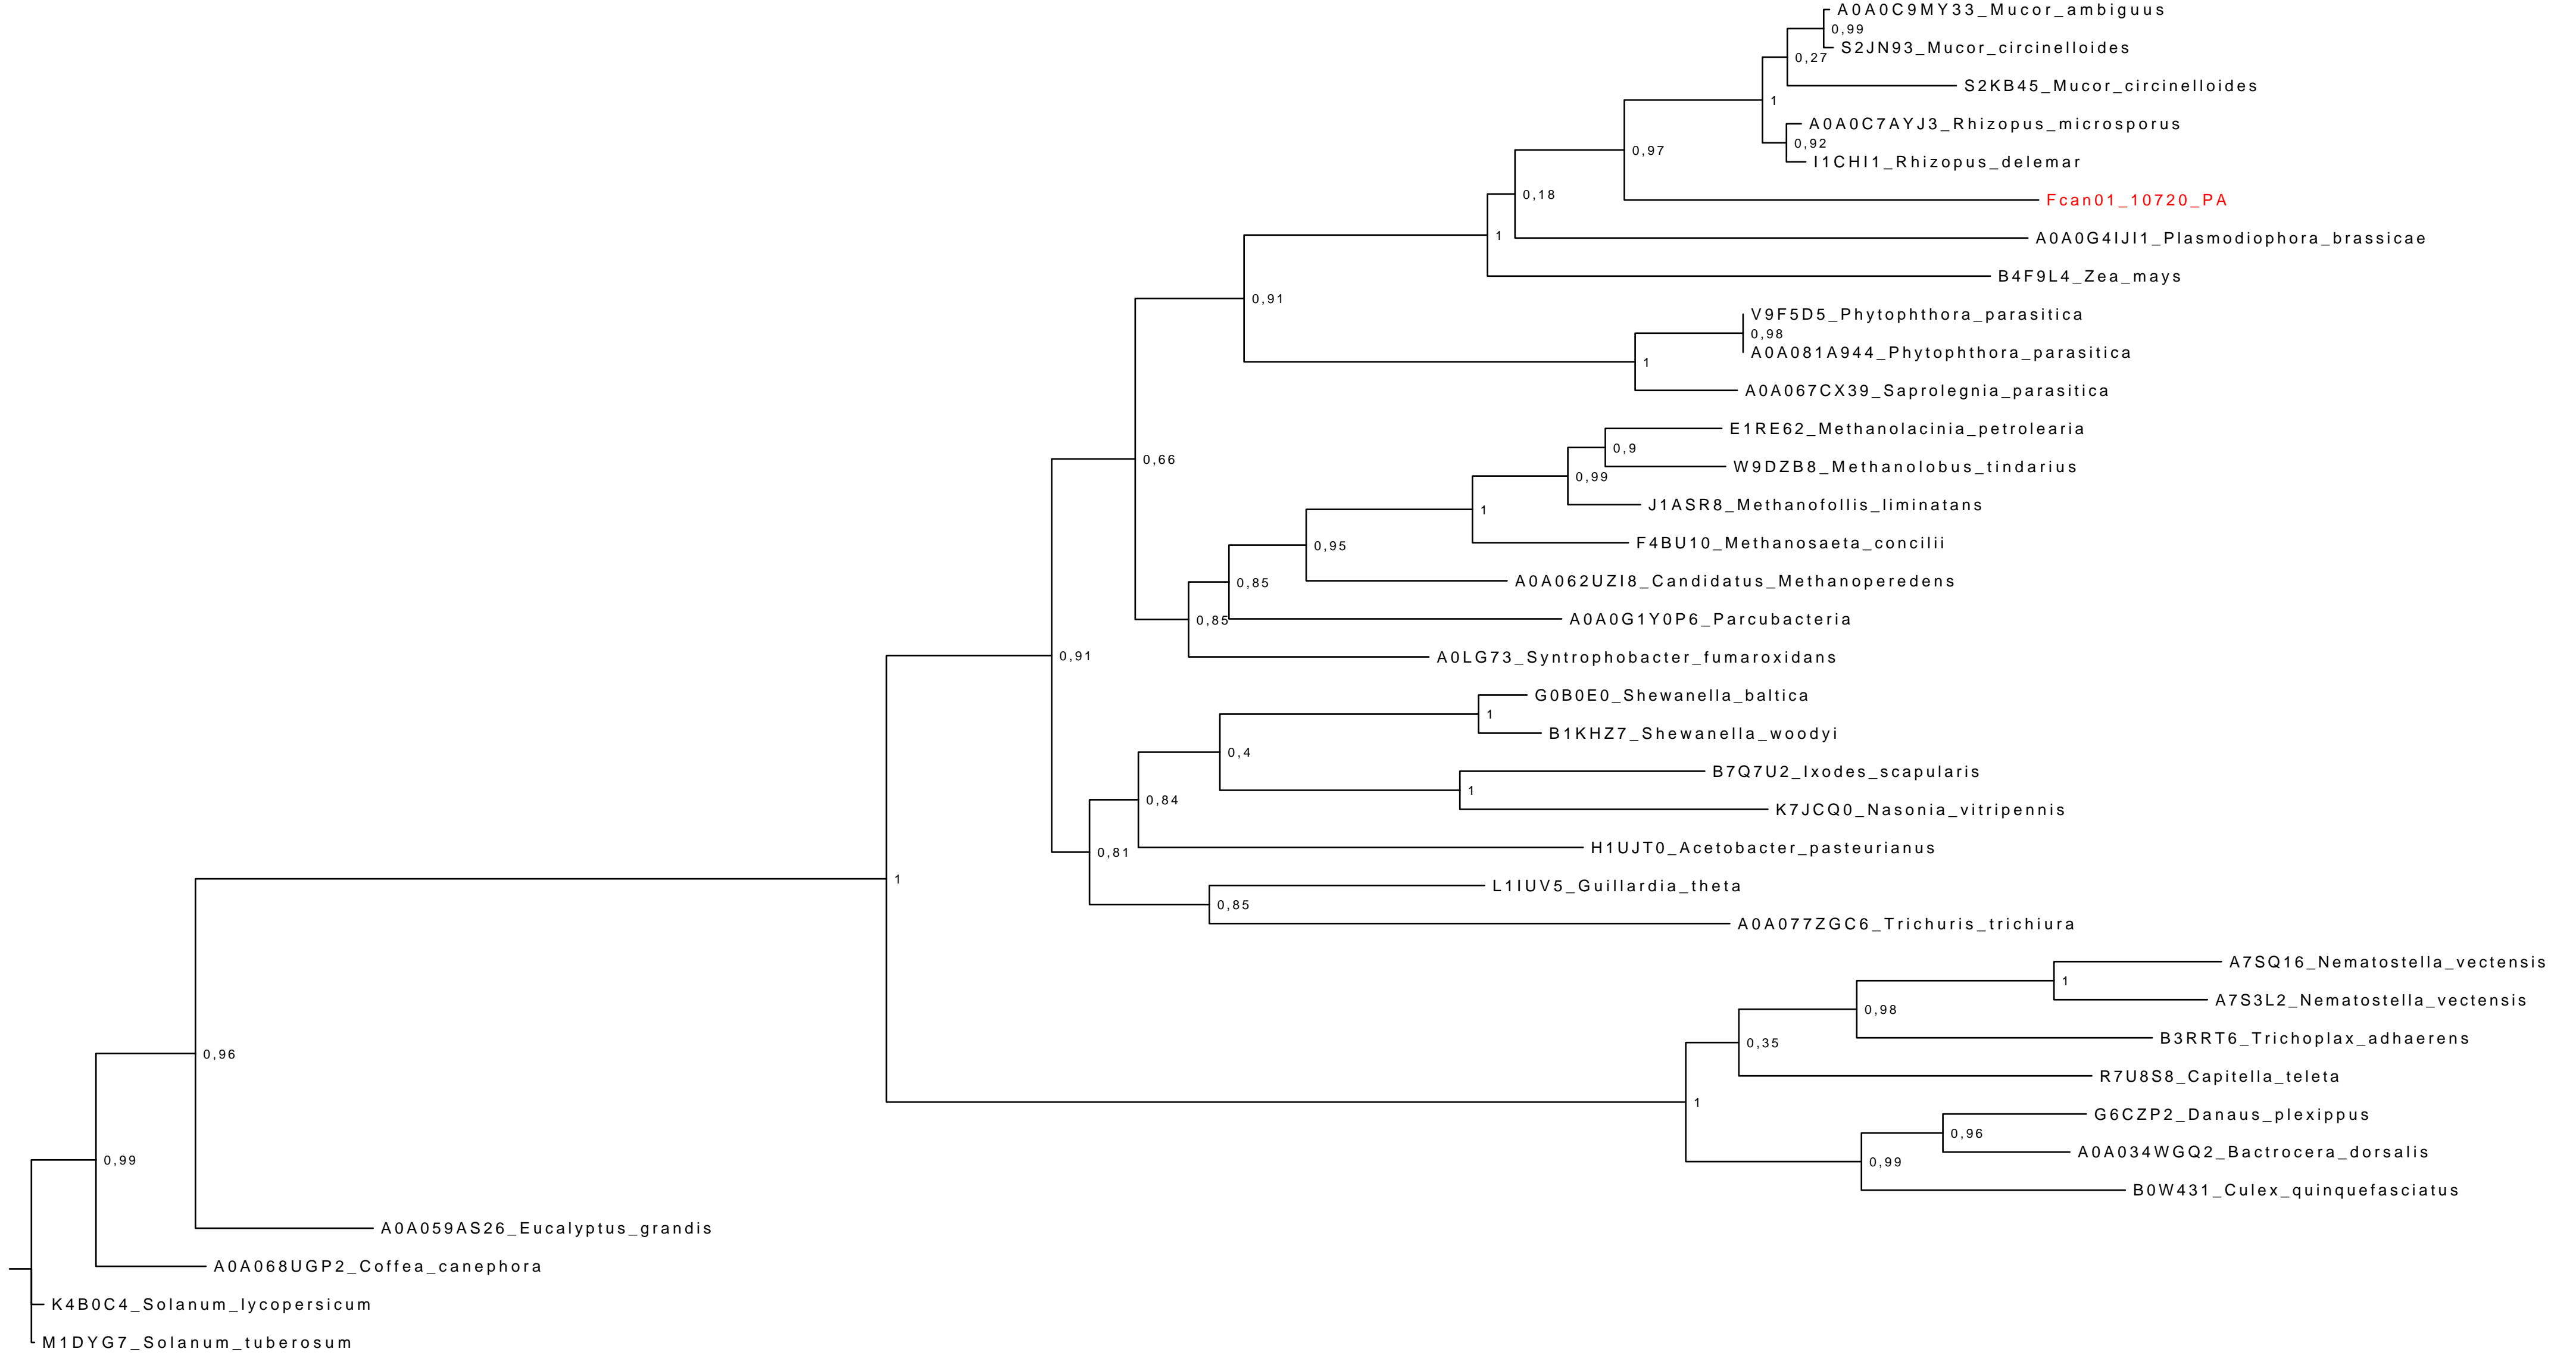

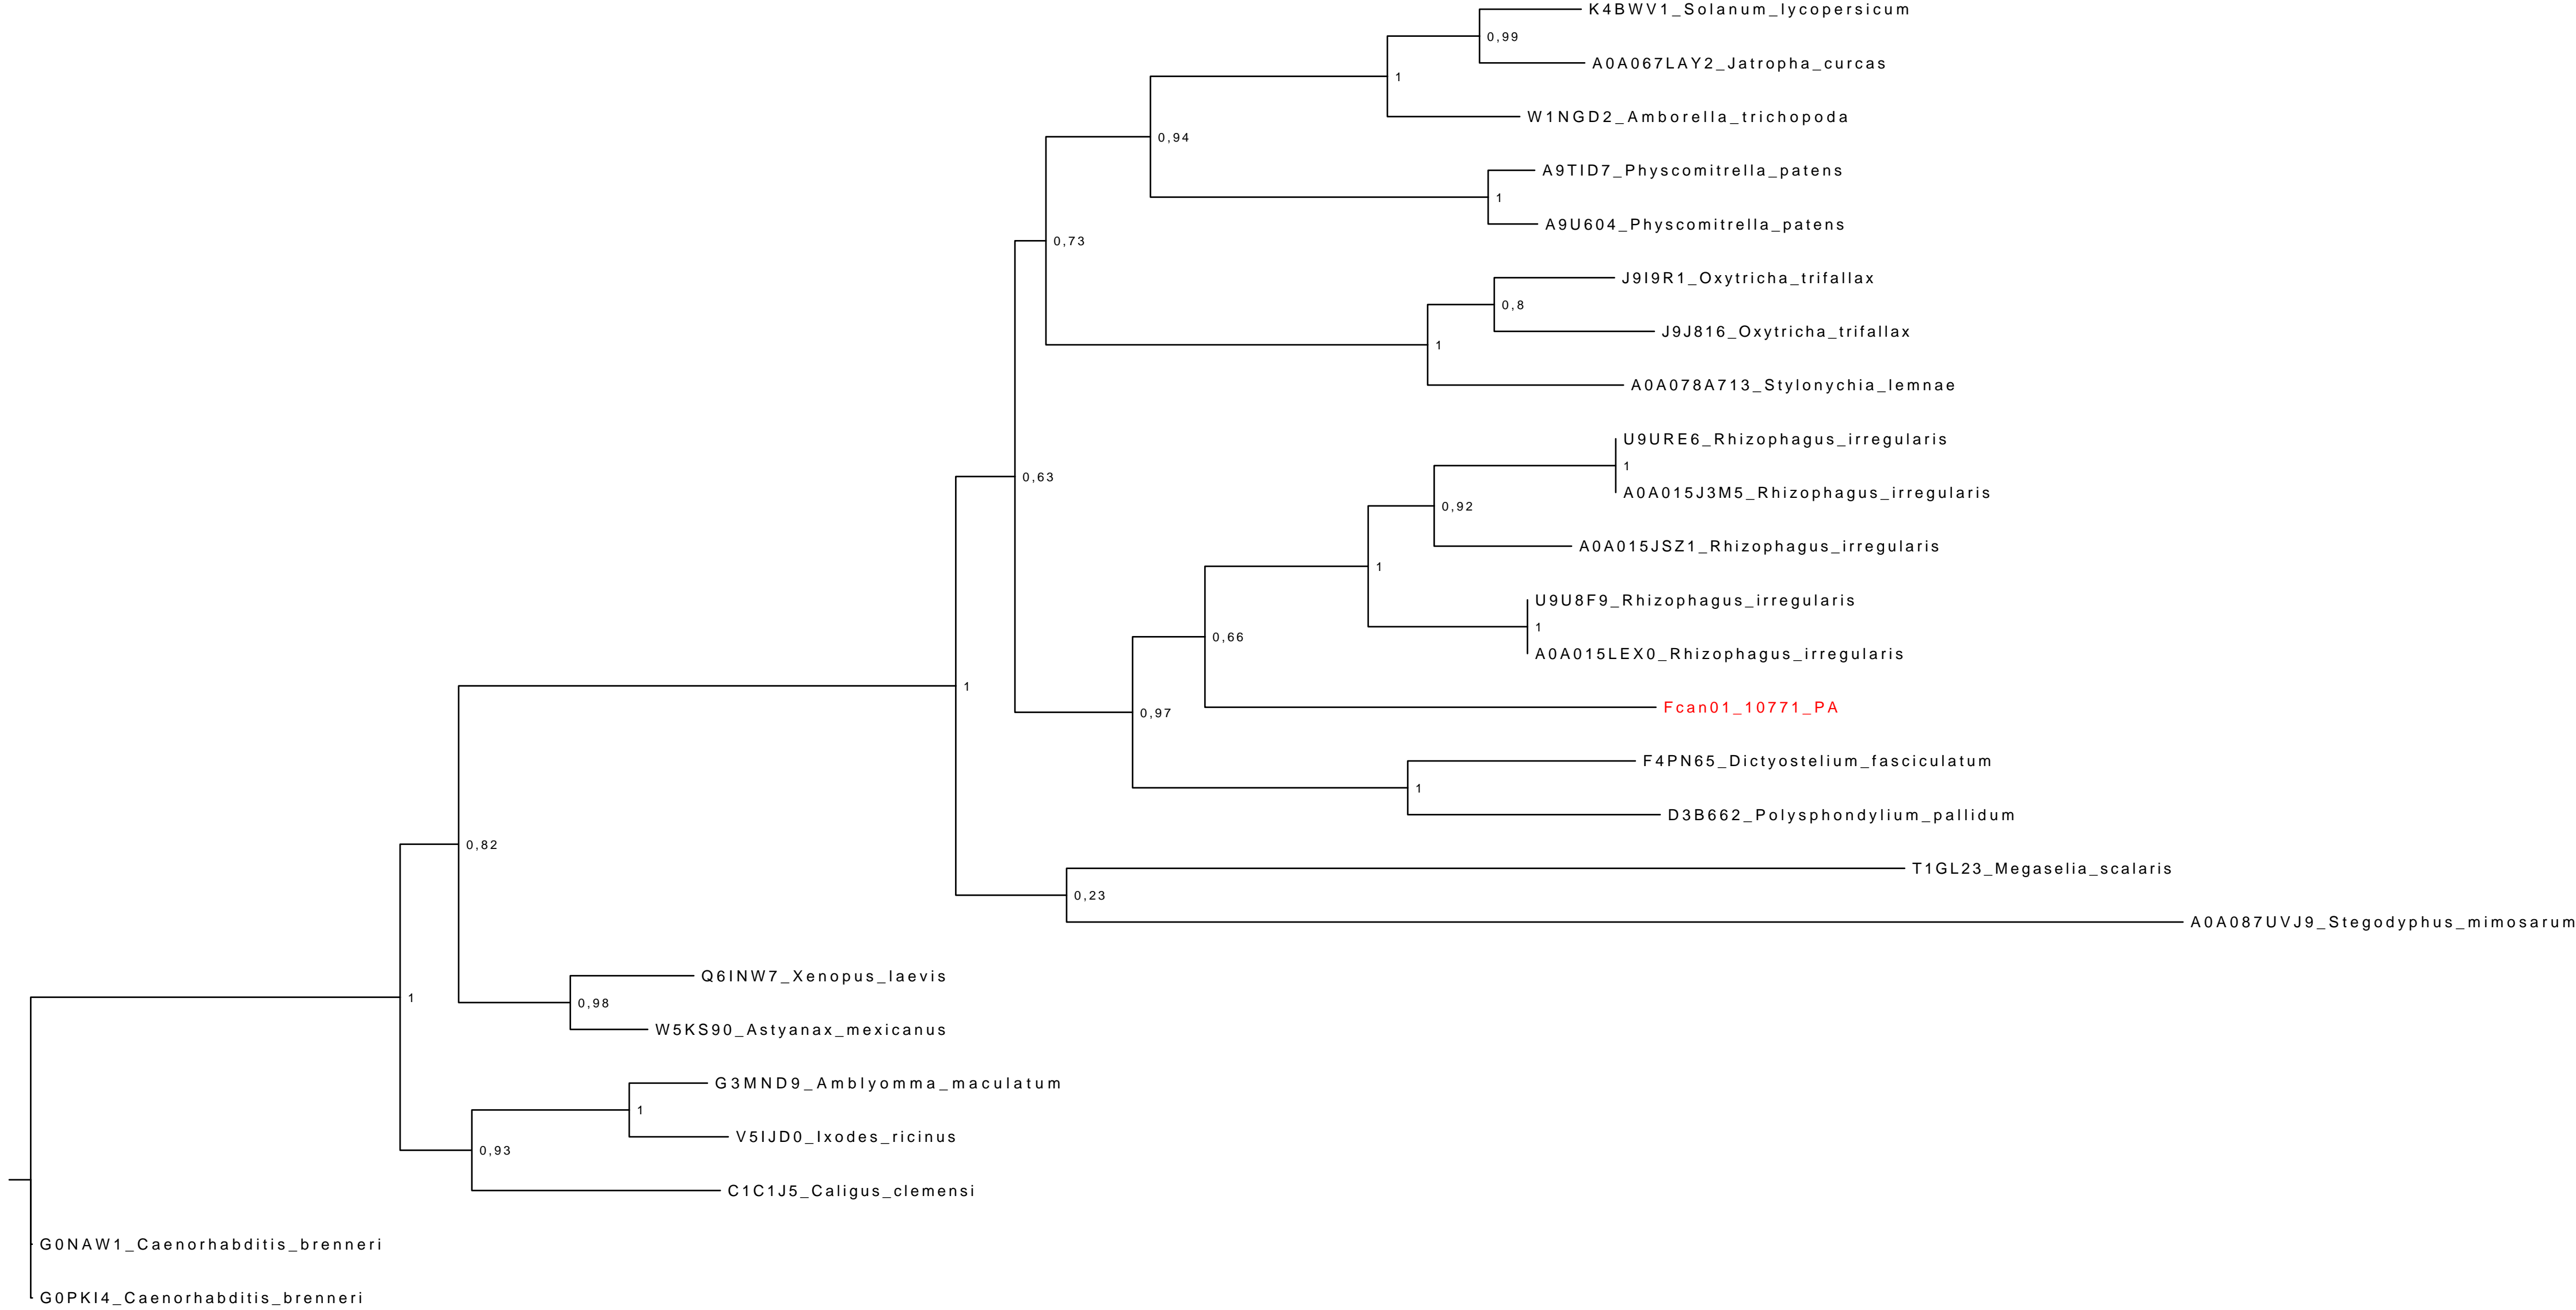

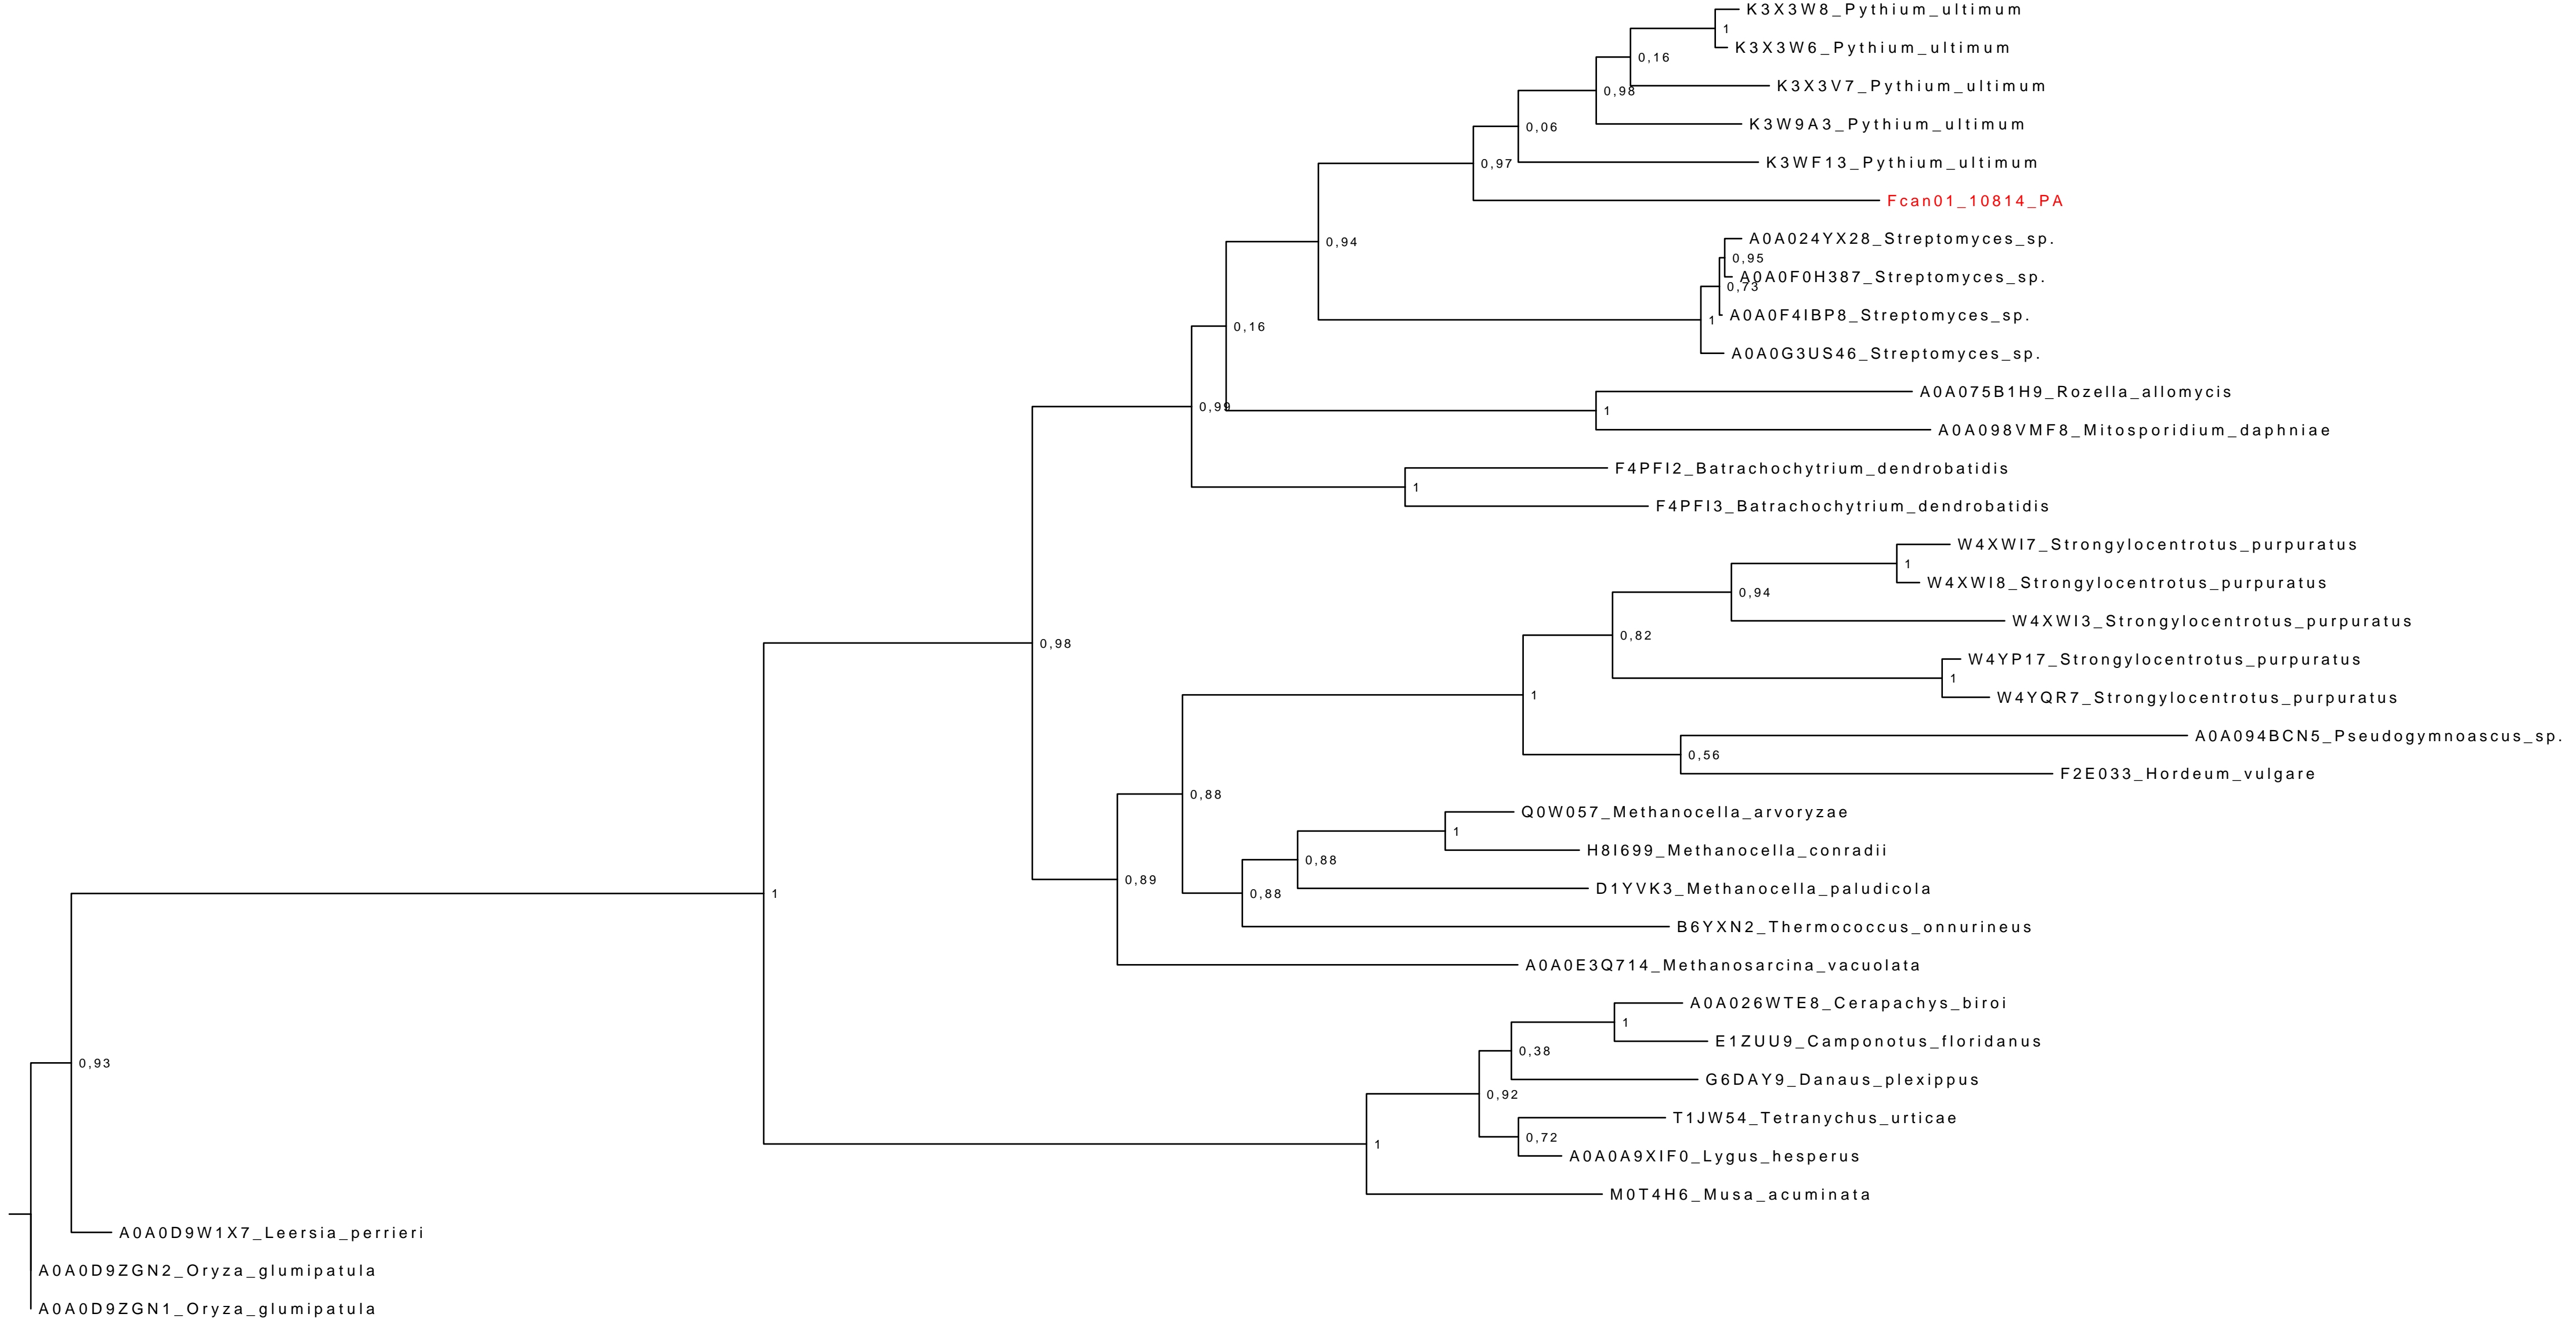

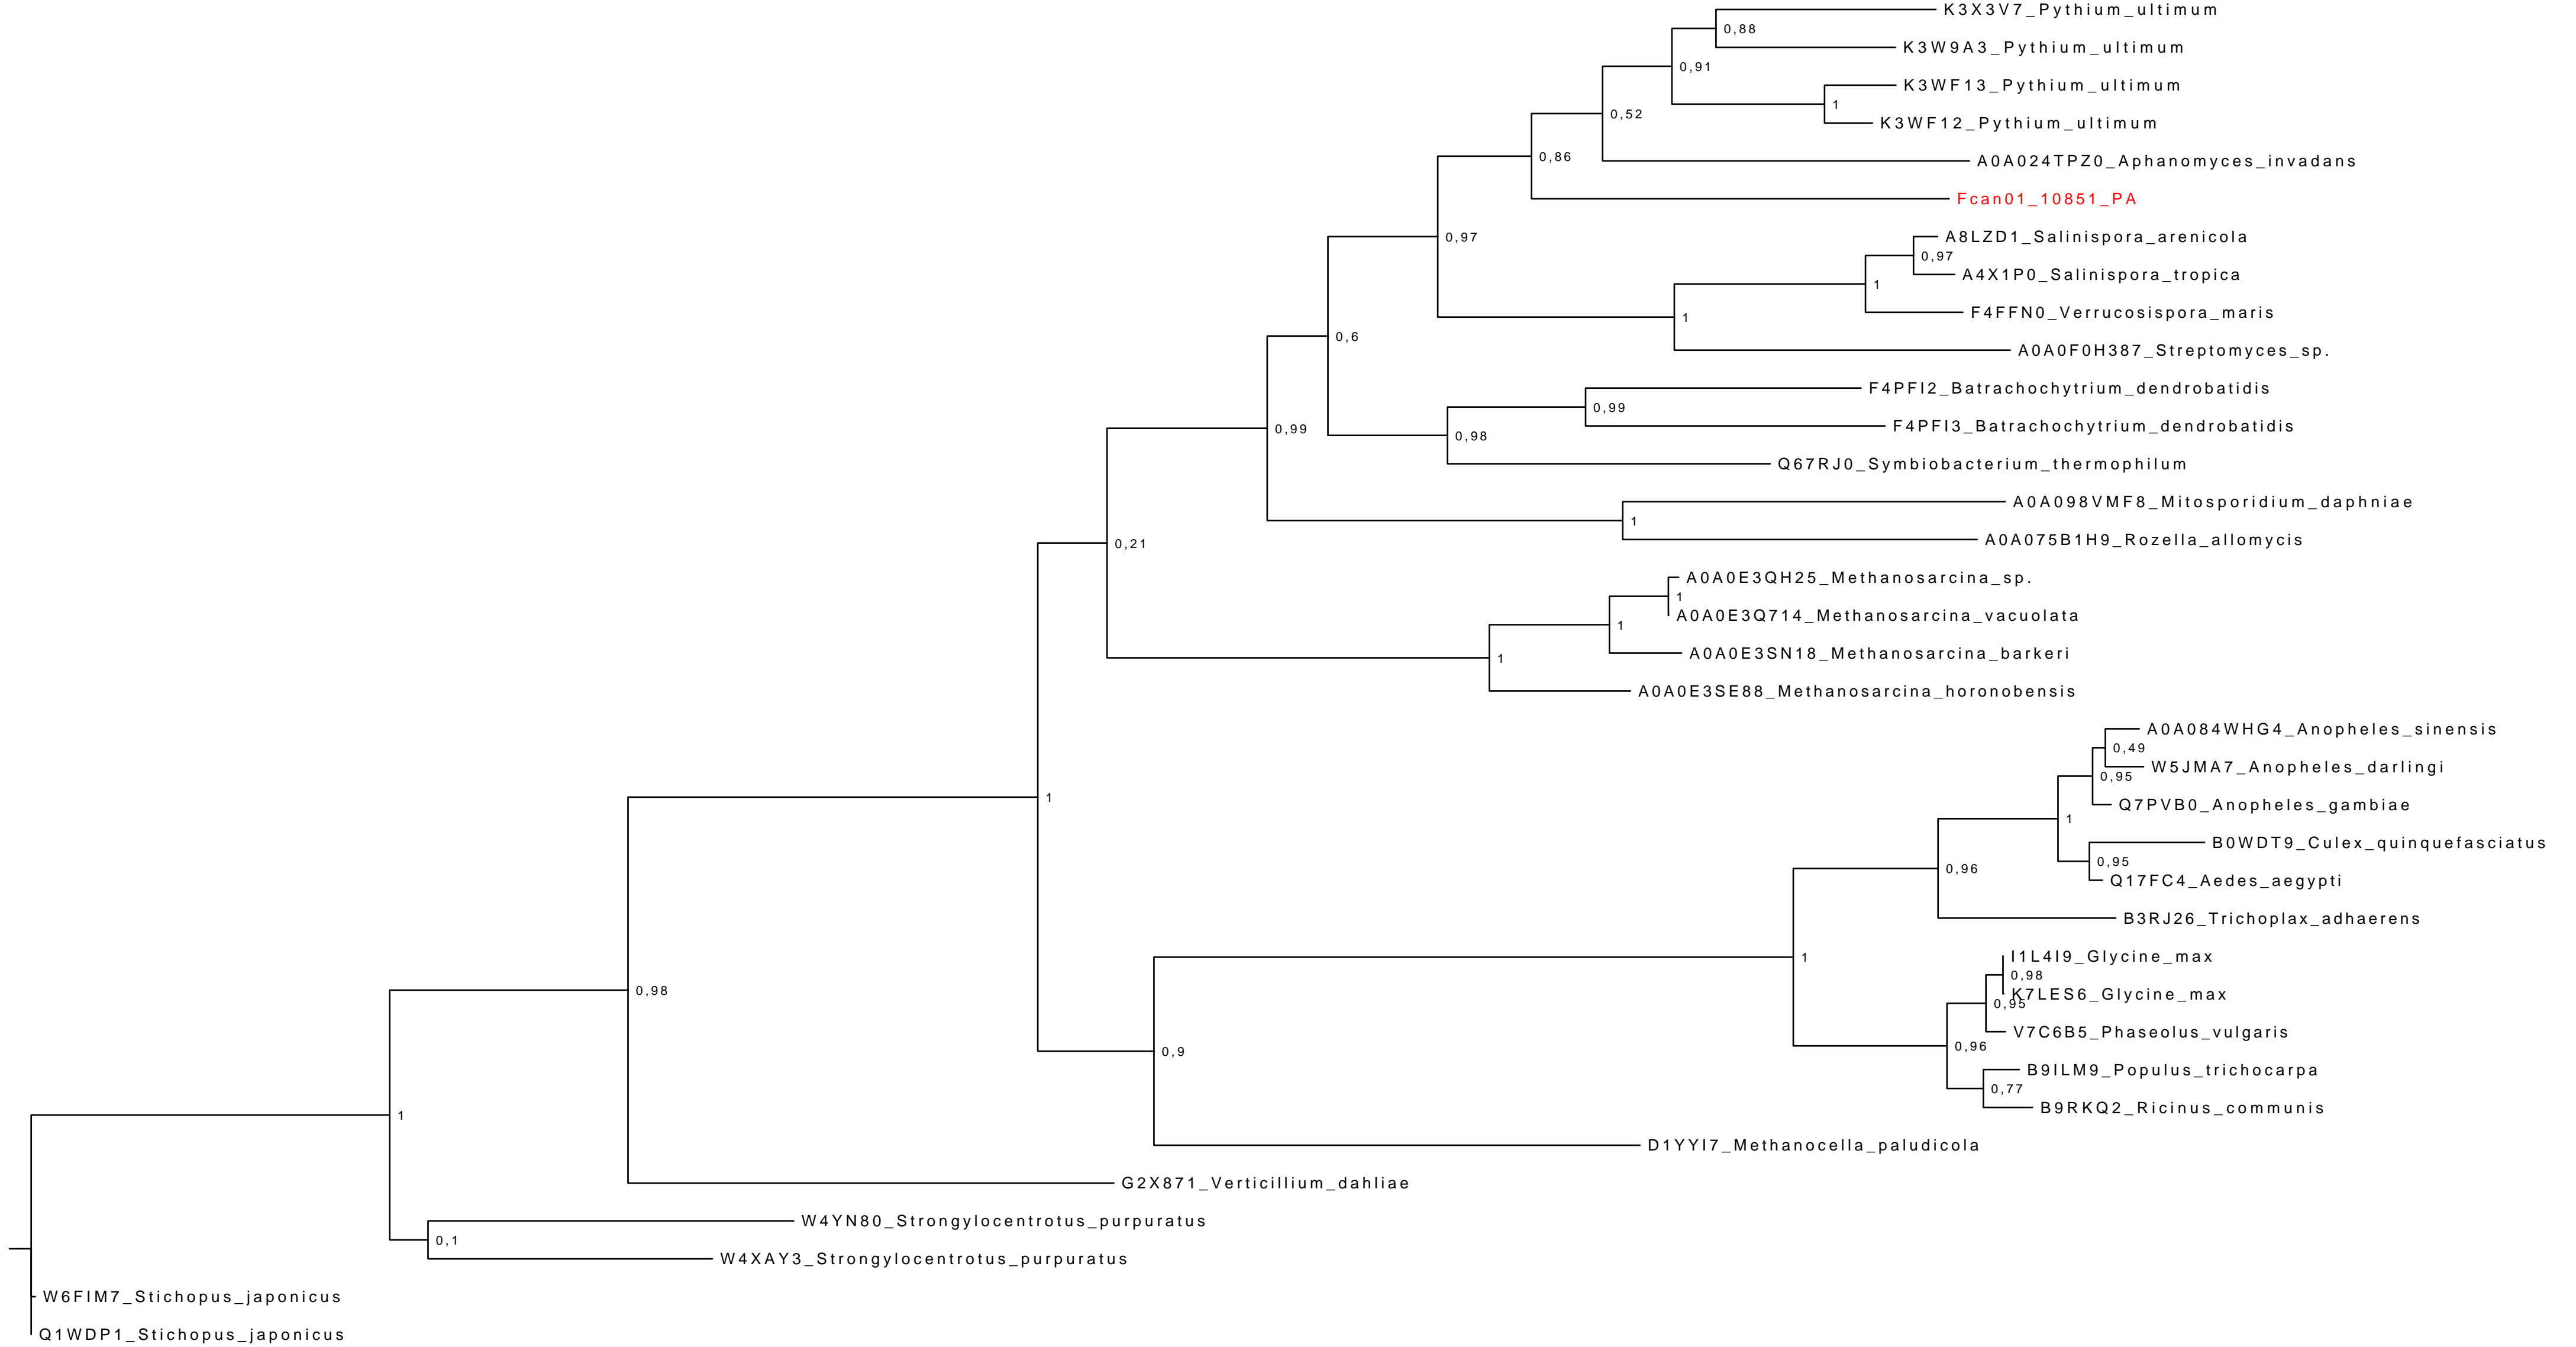

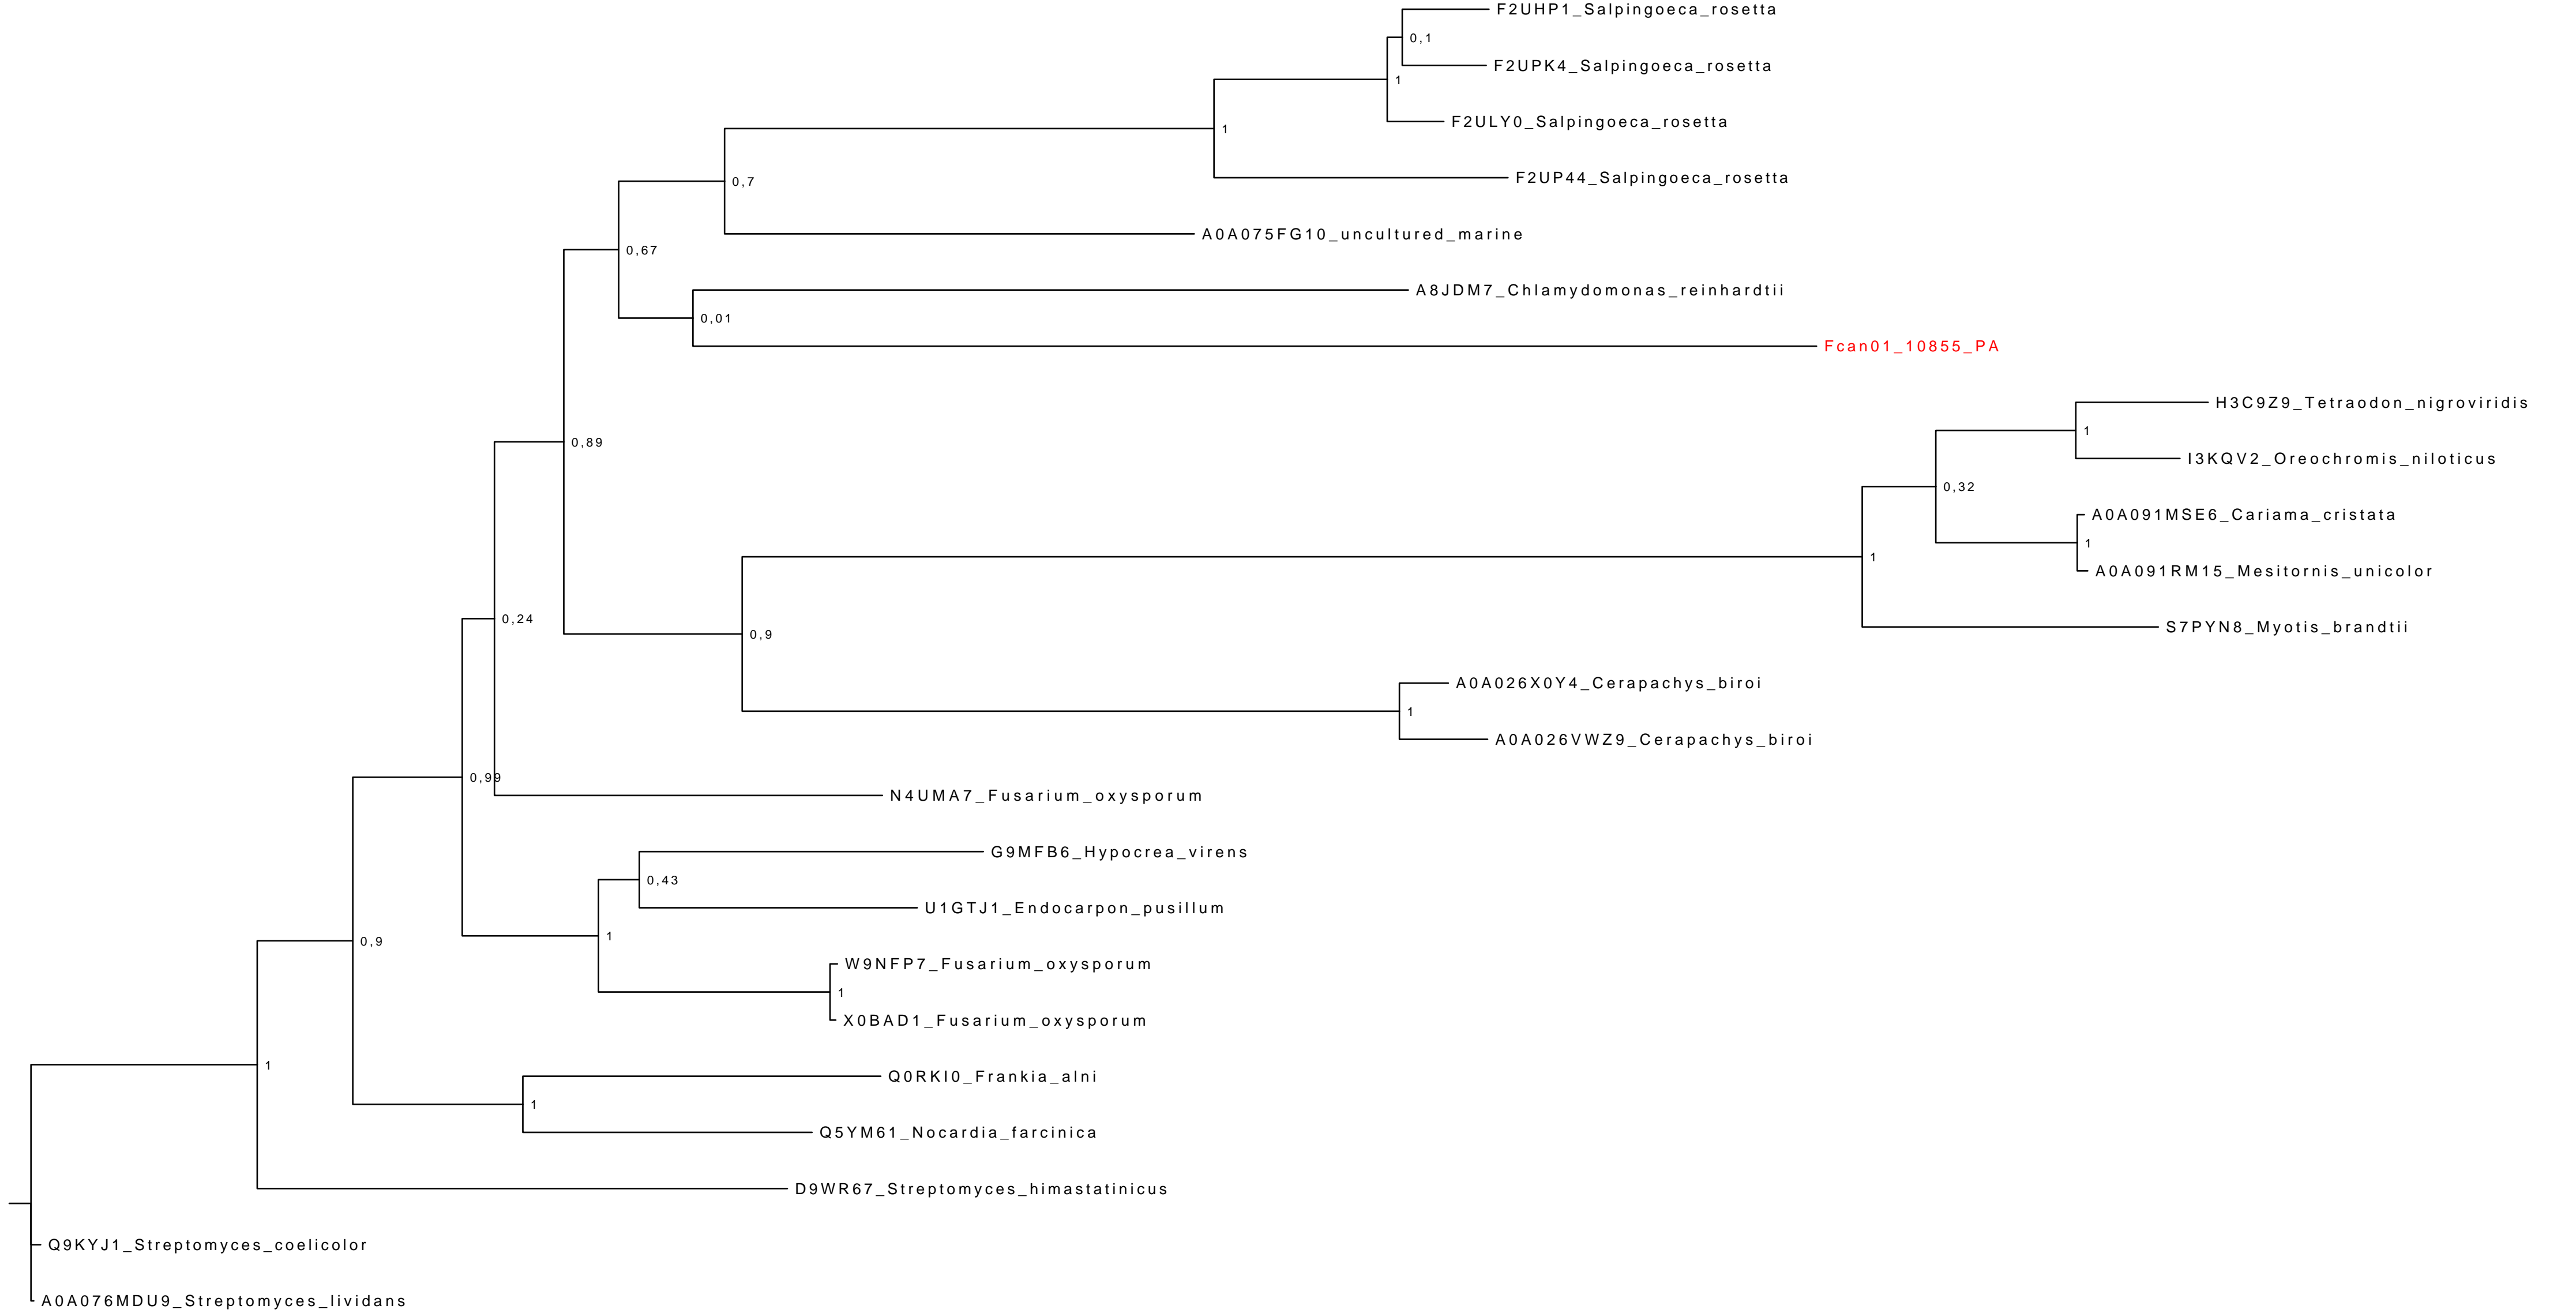

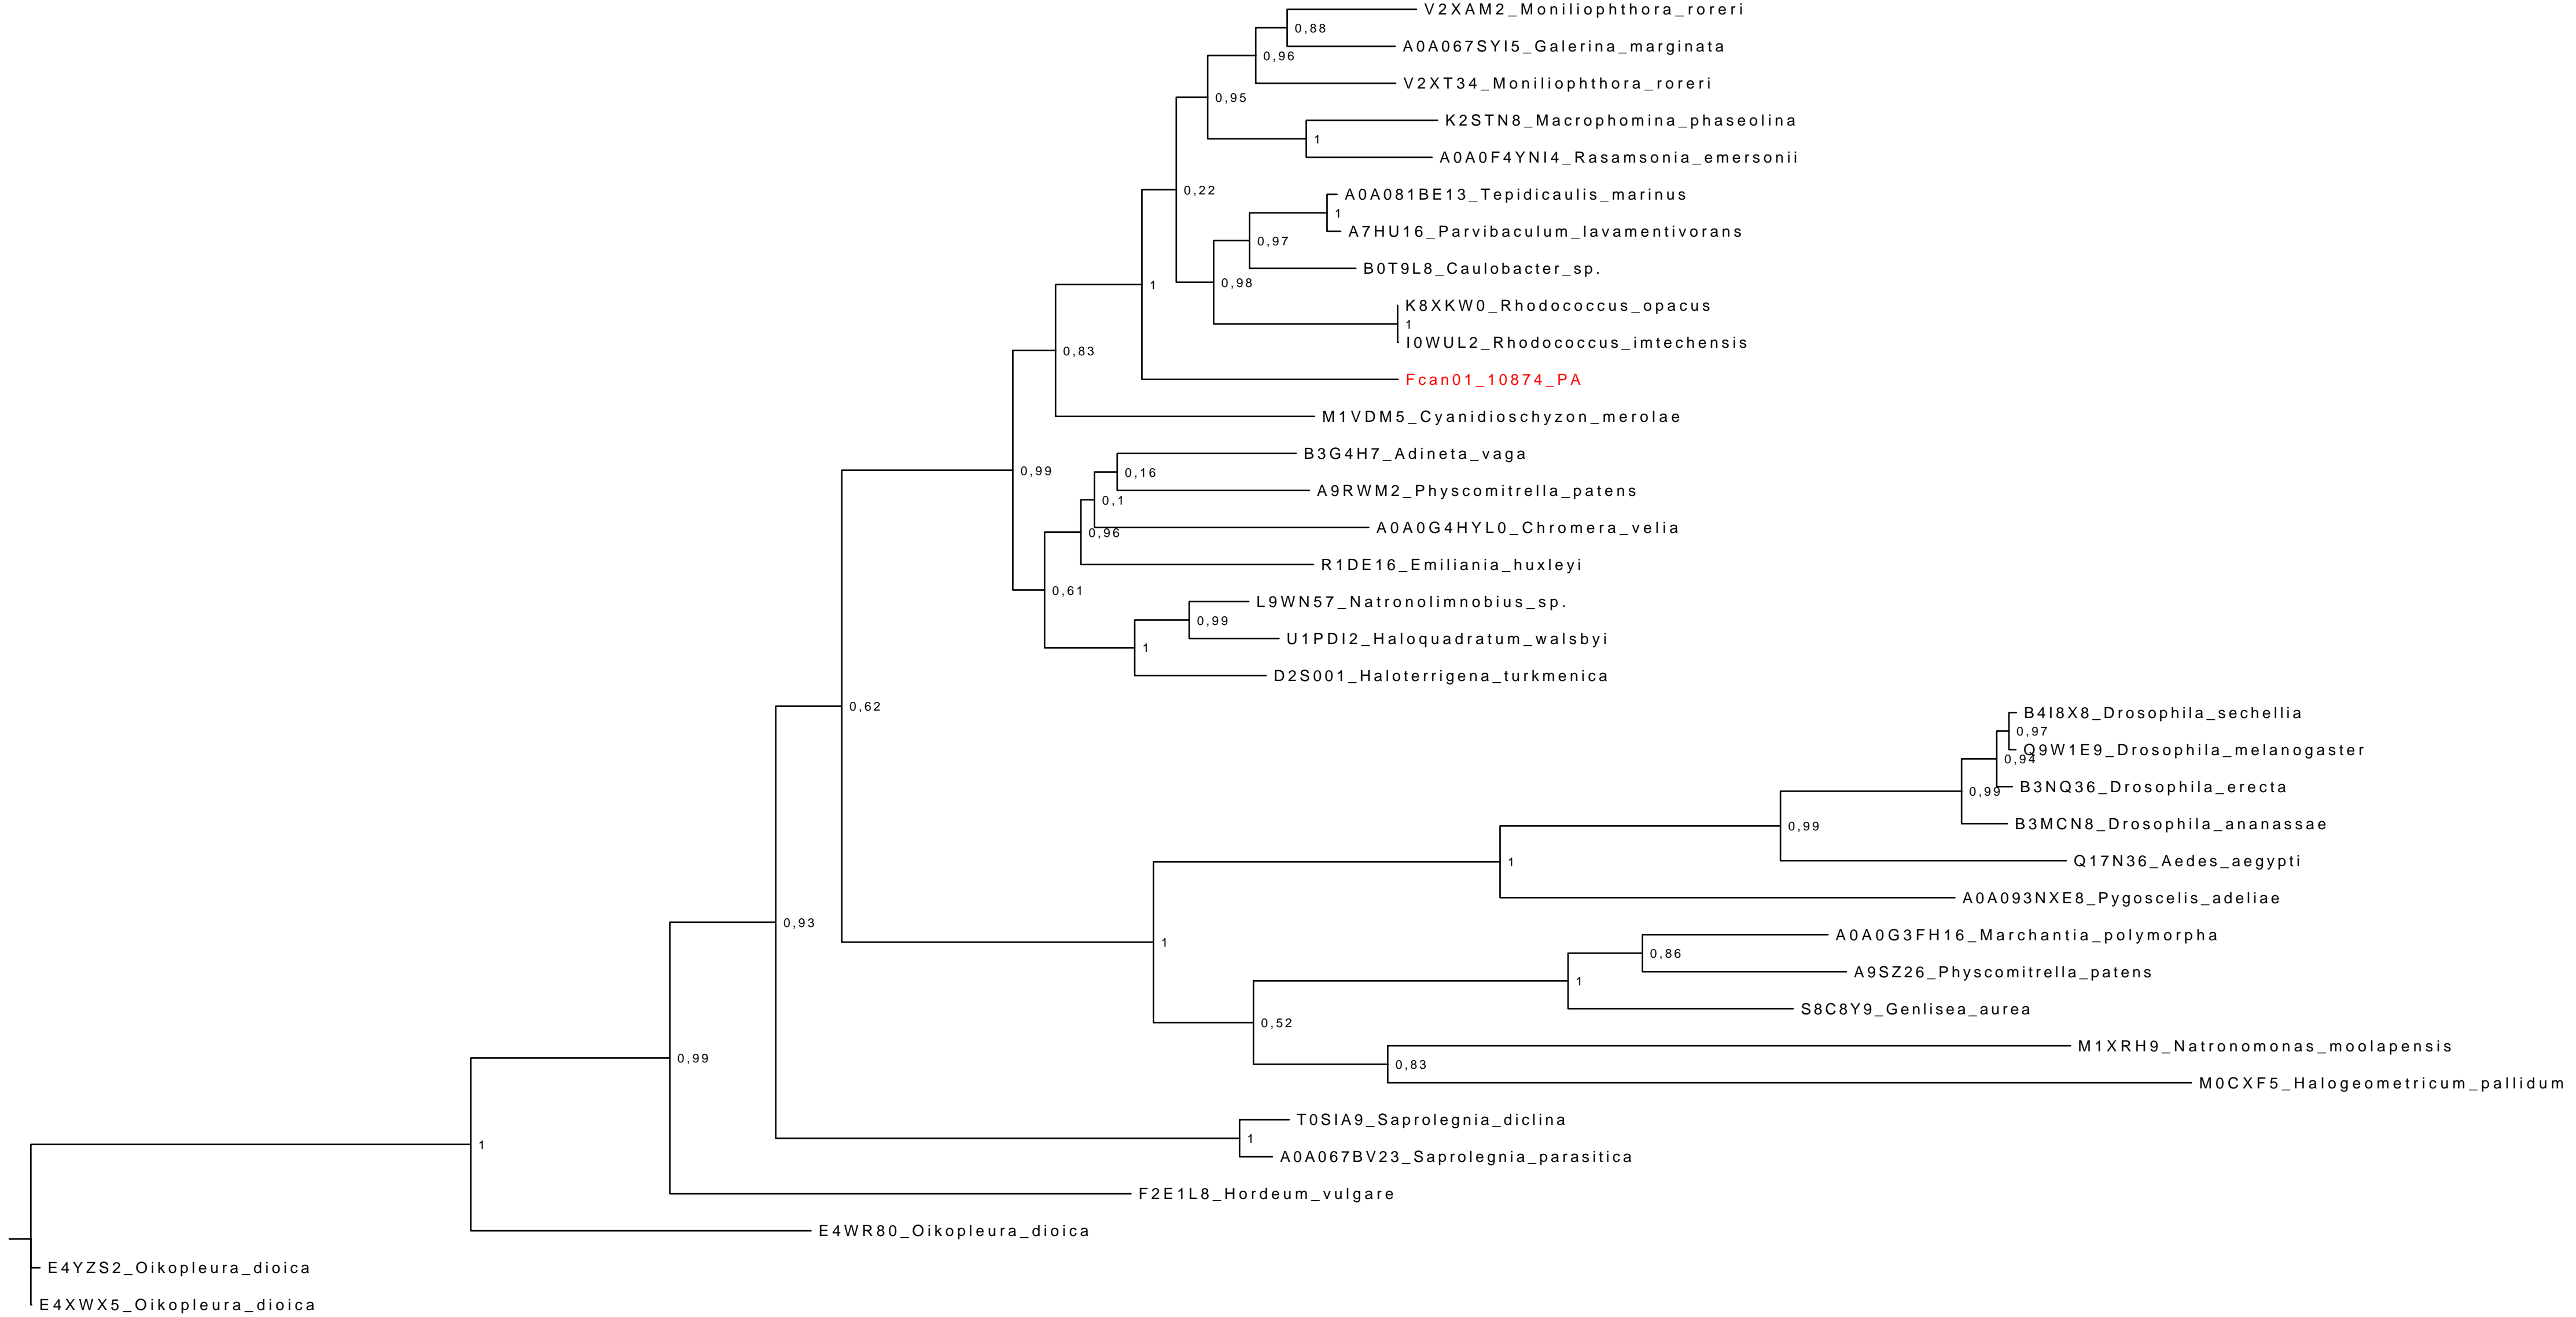

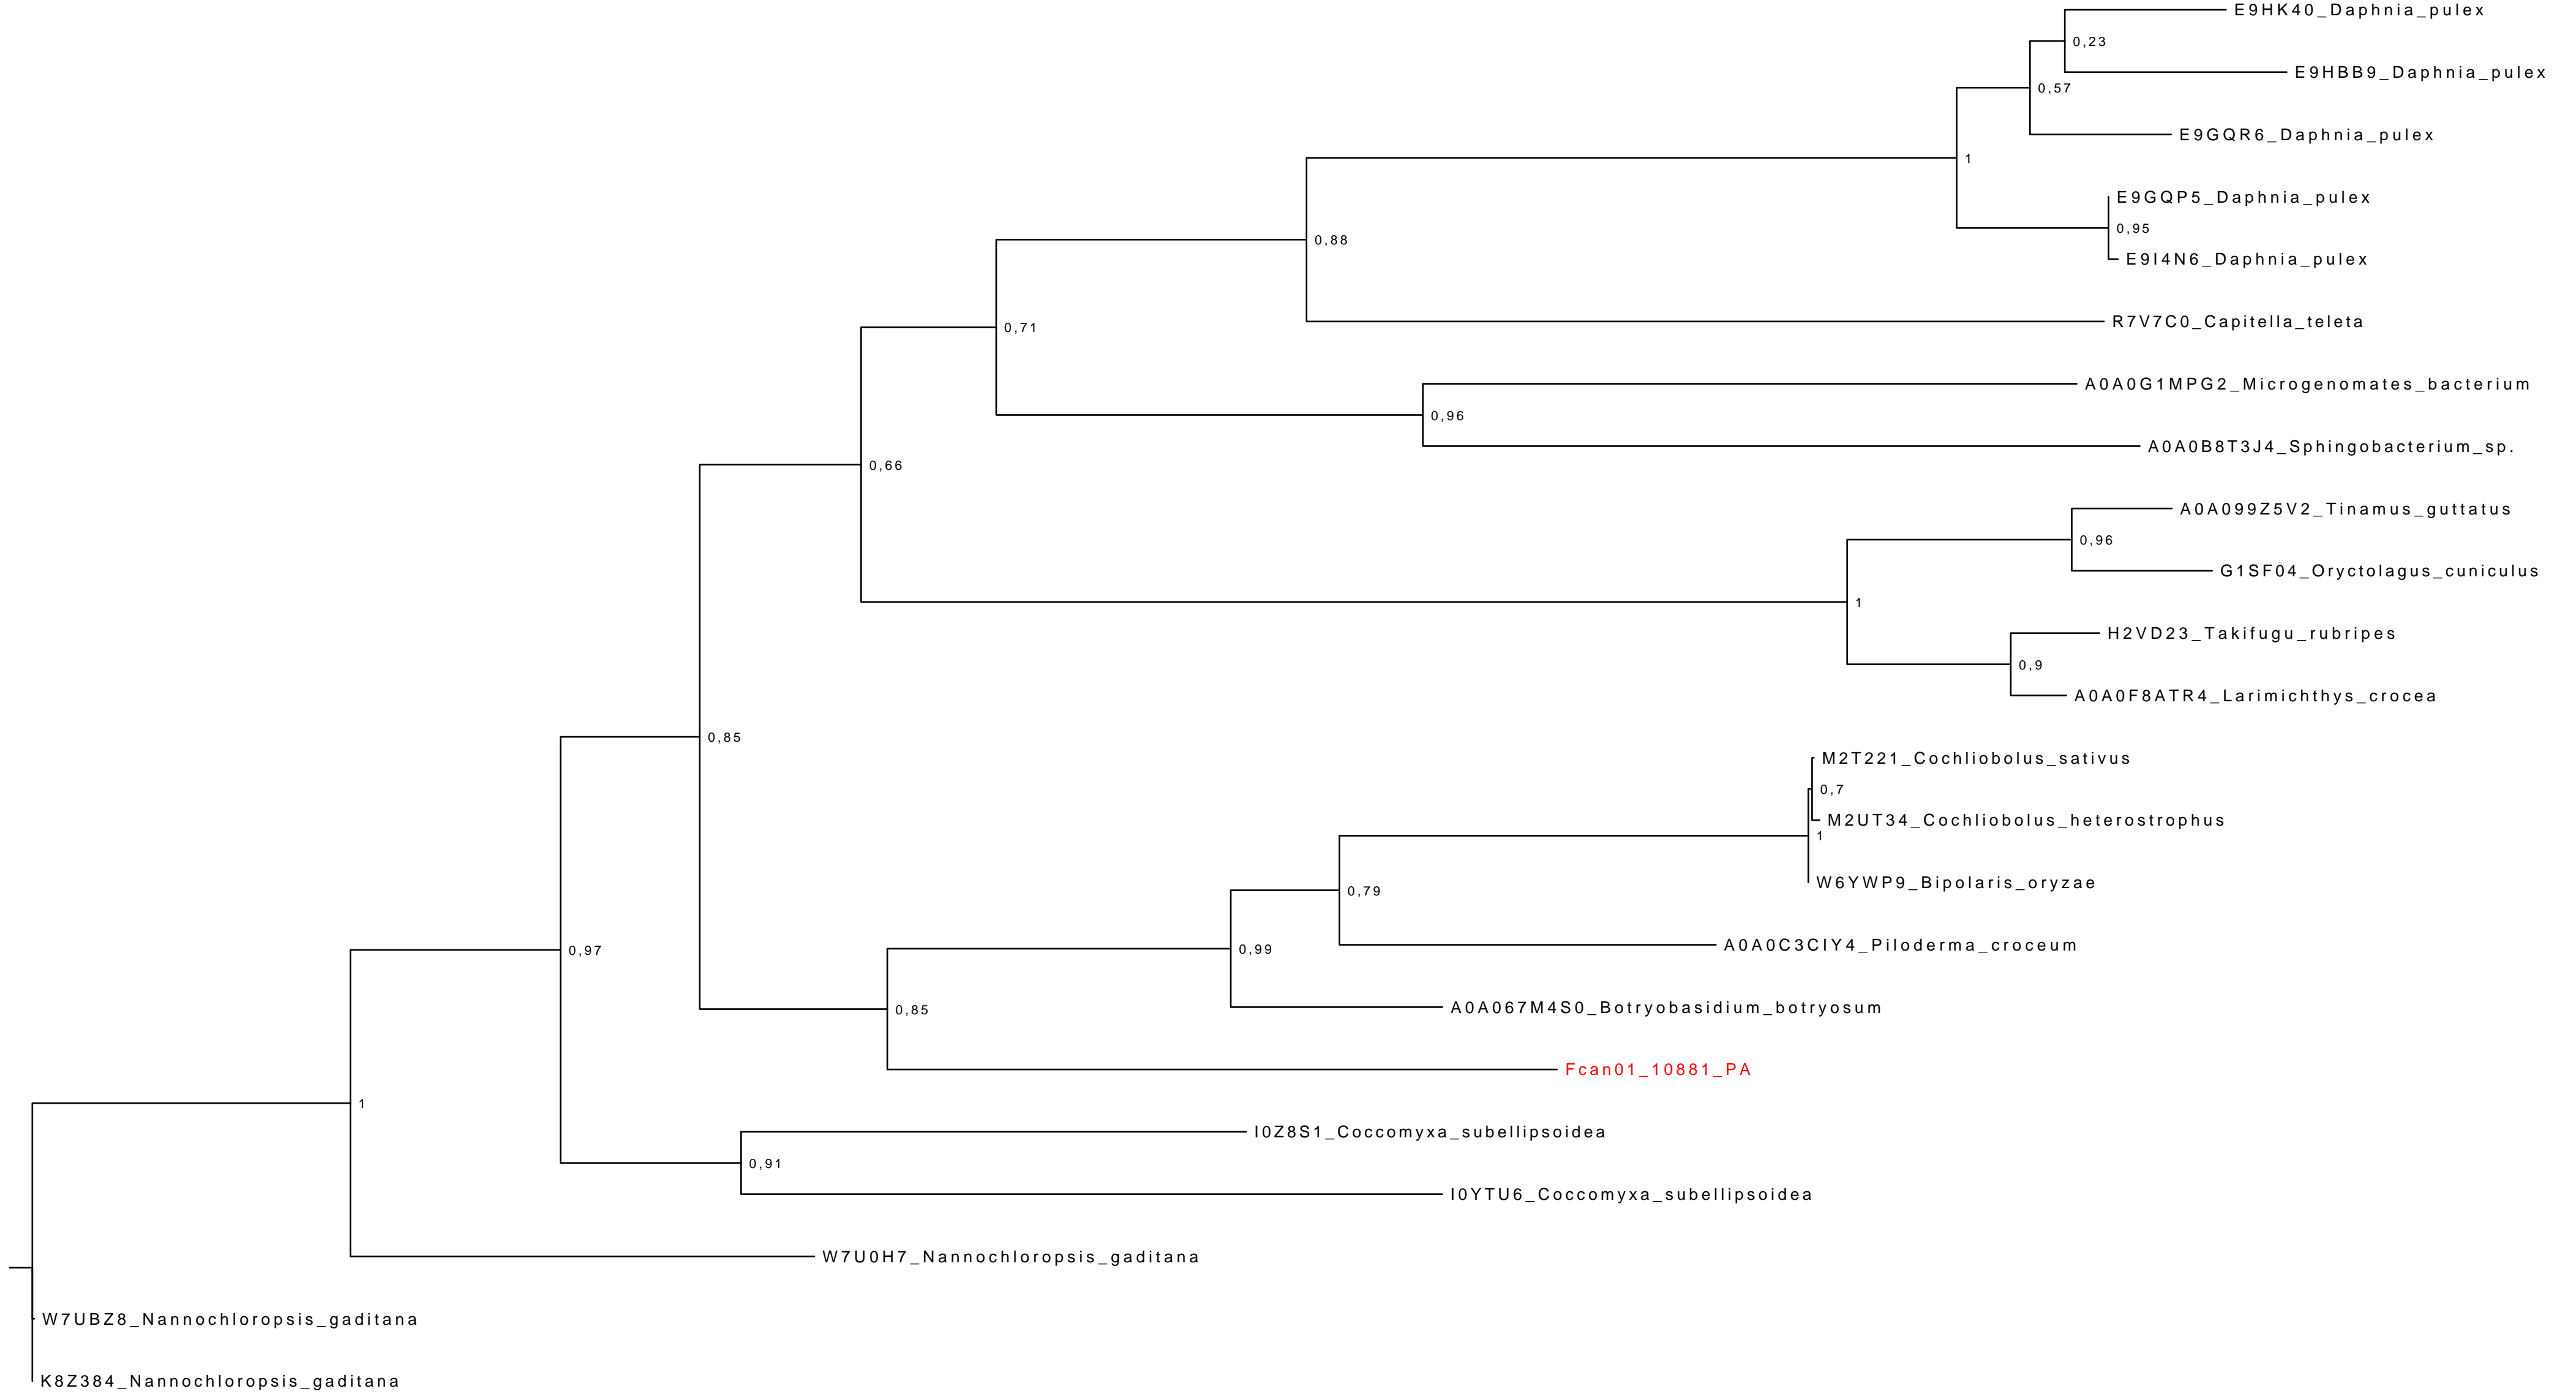

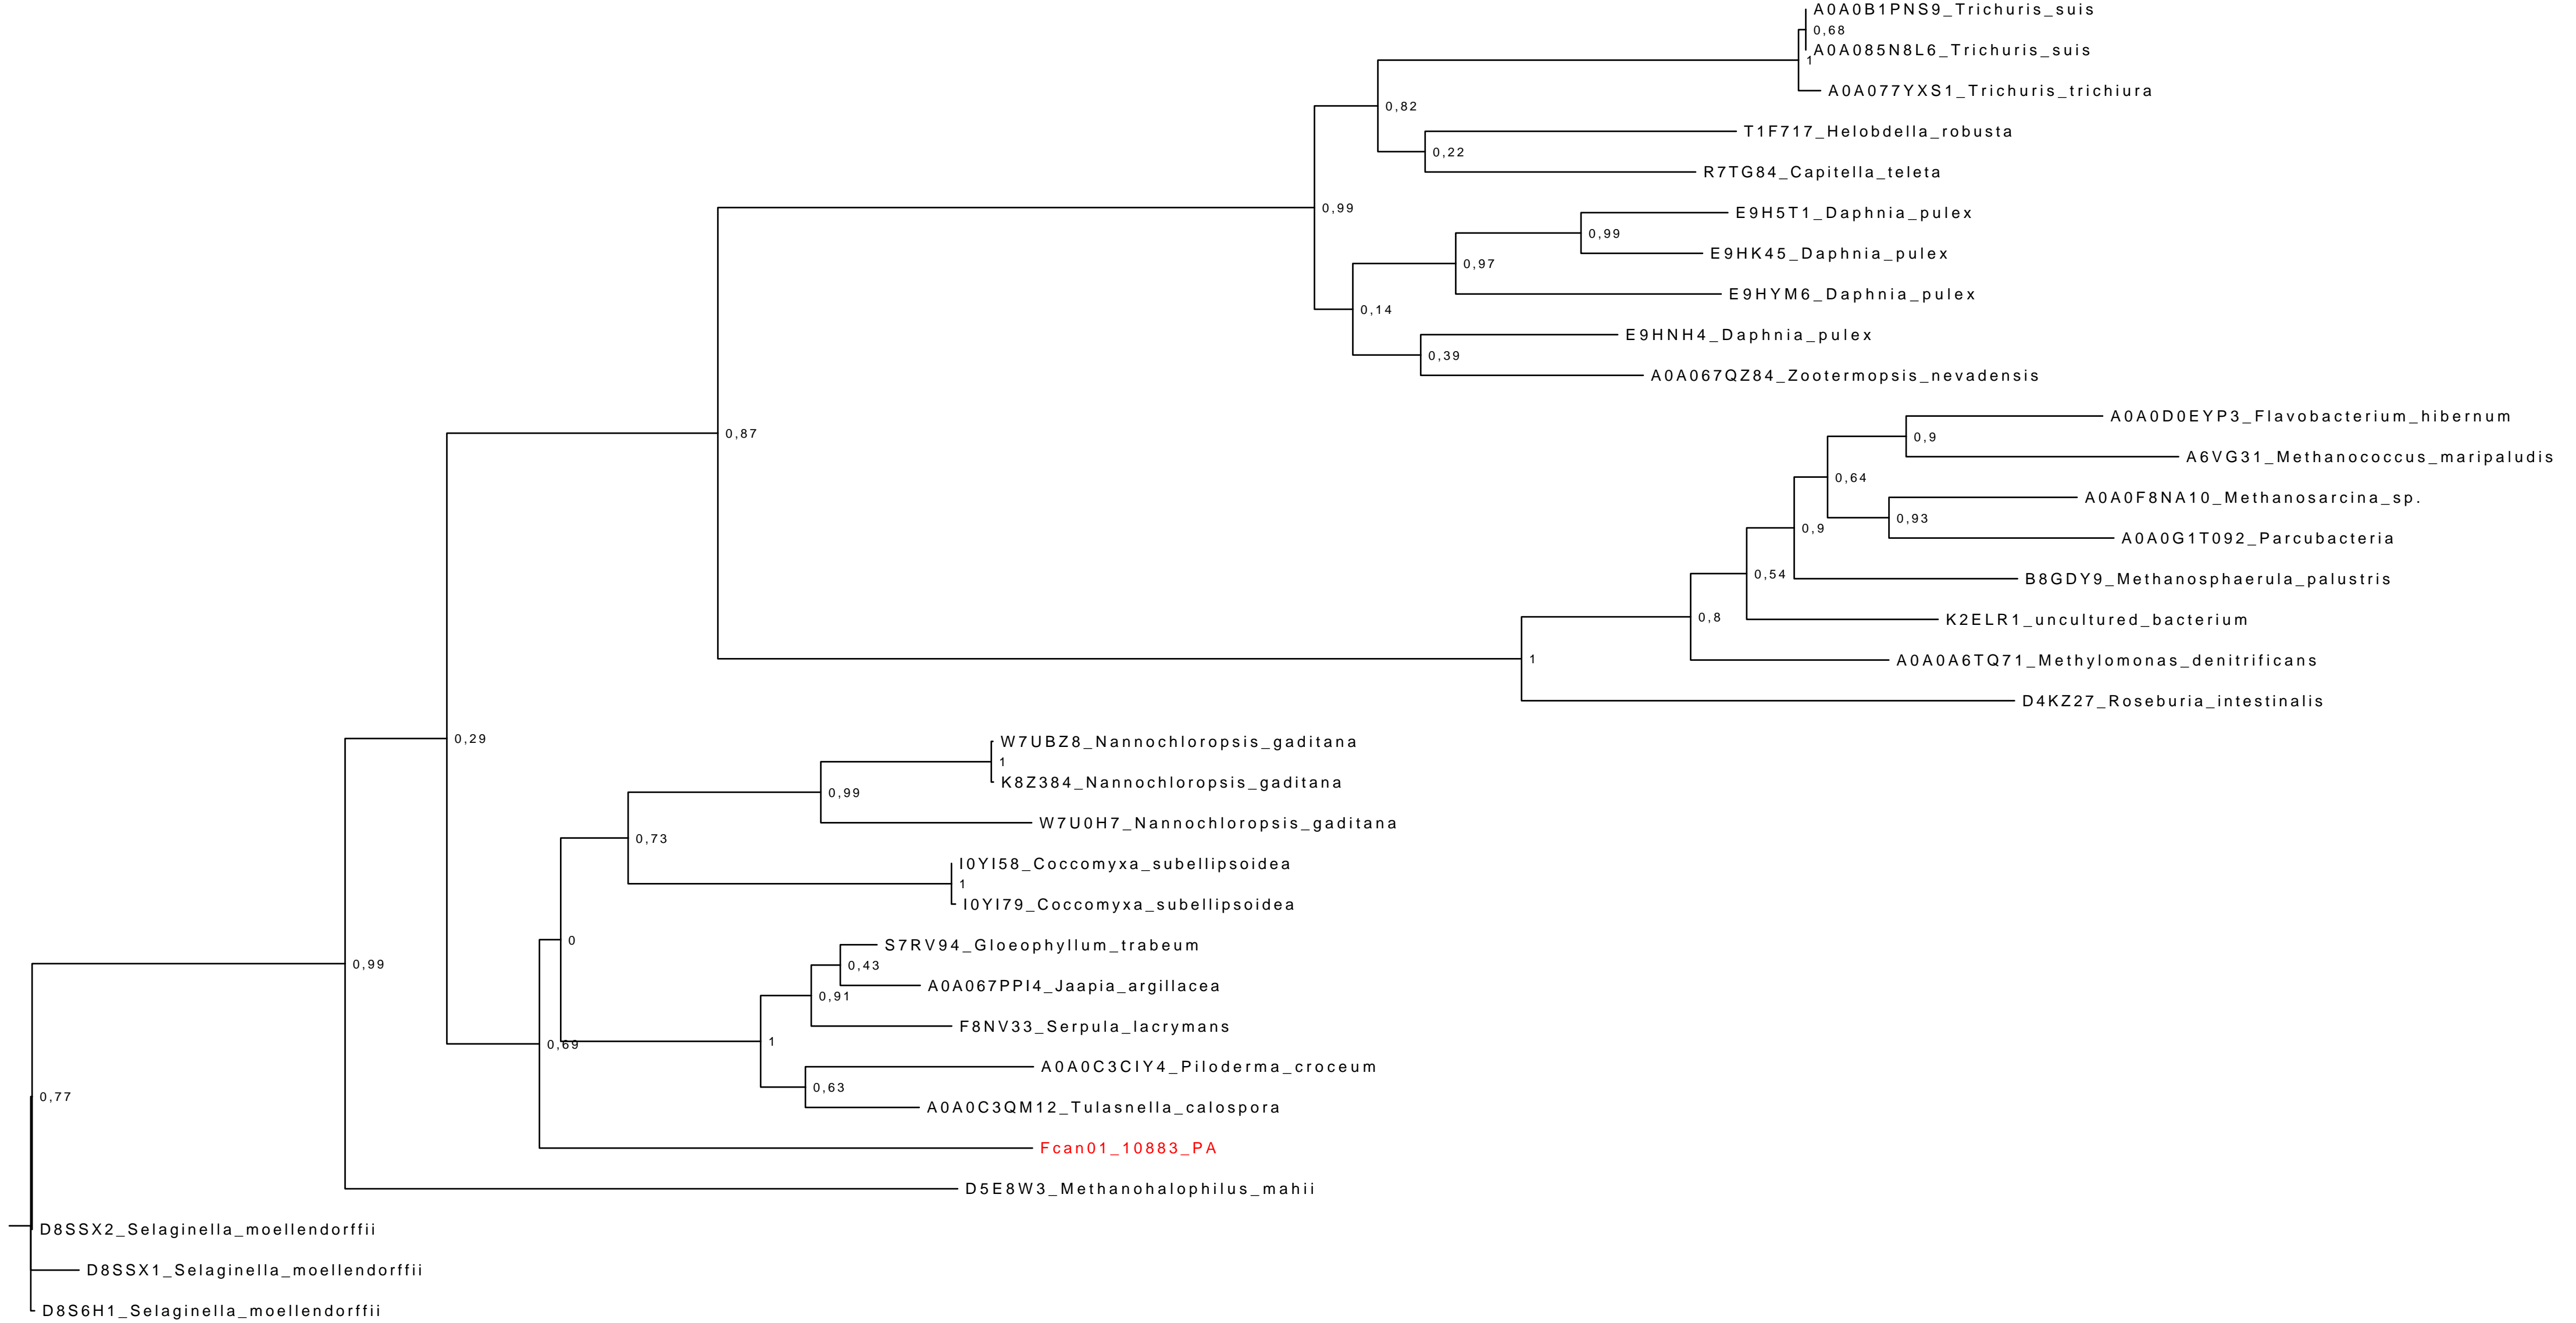

0.7



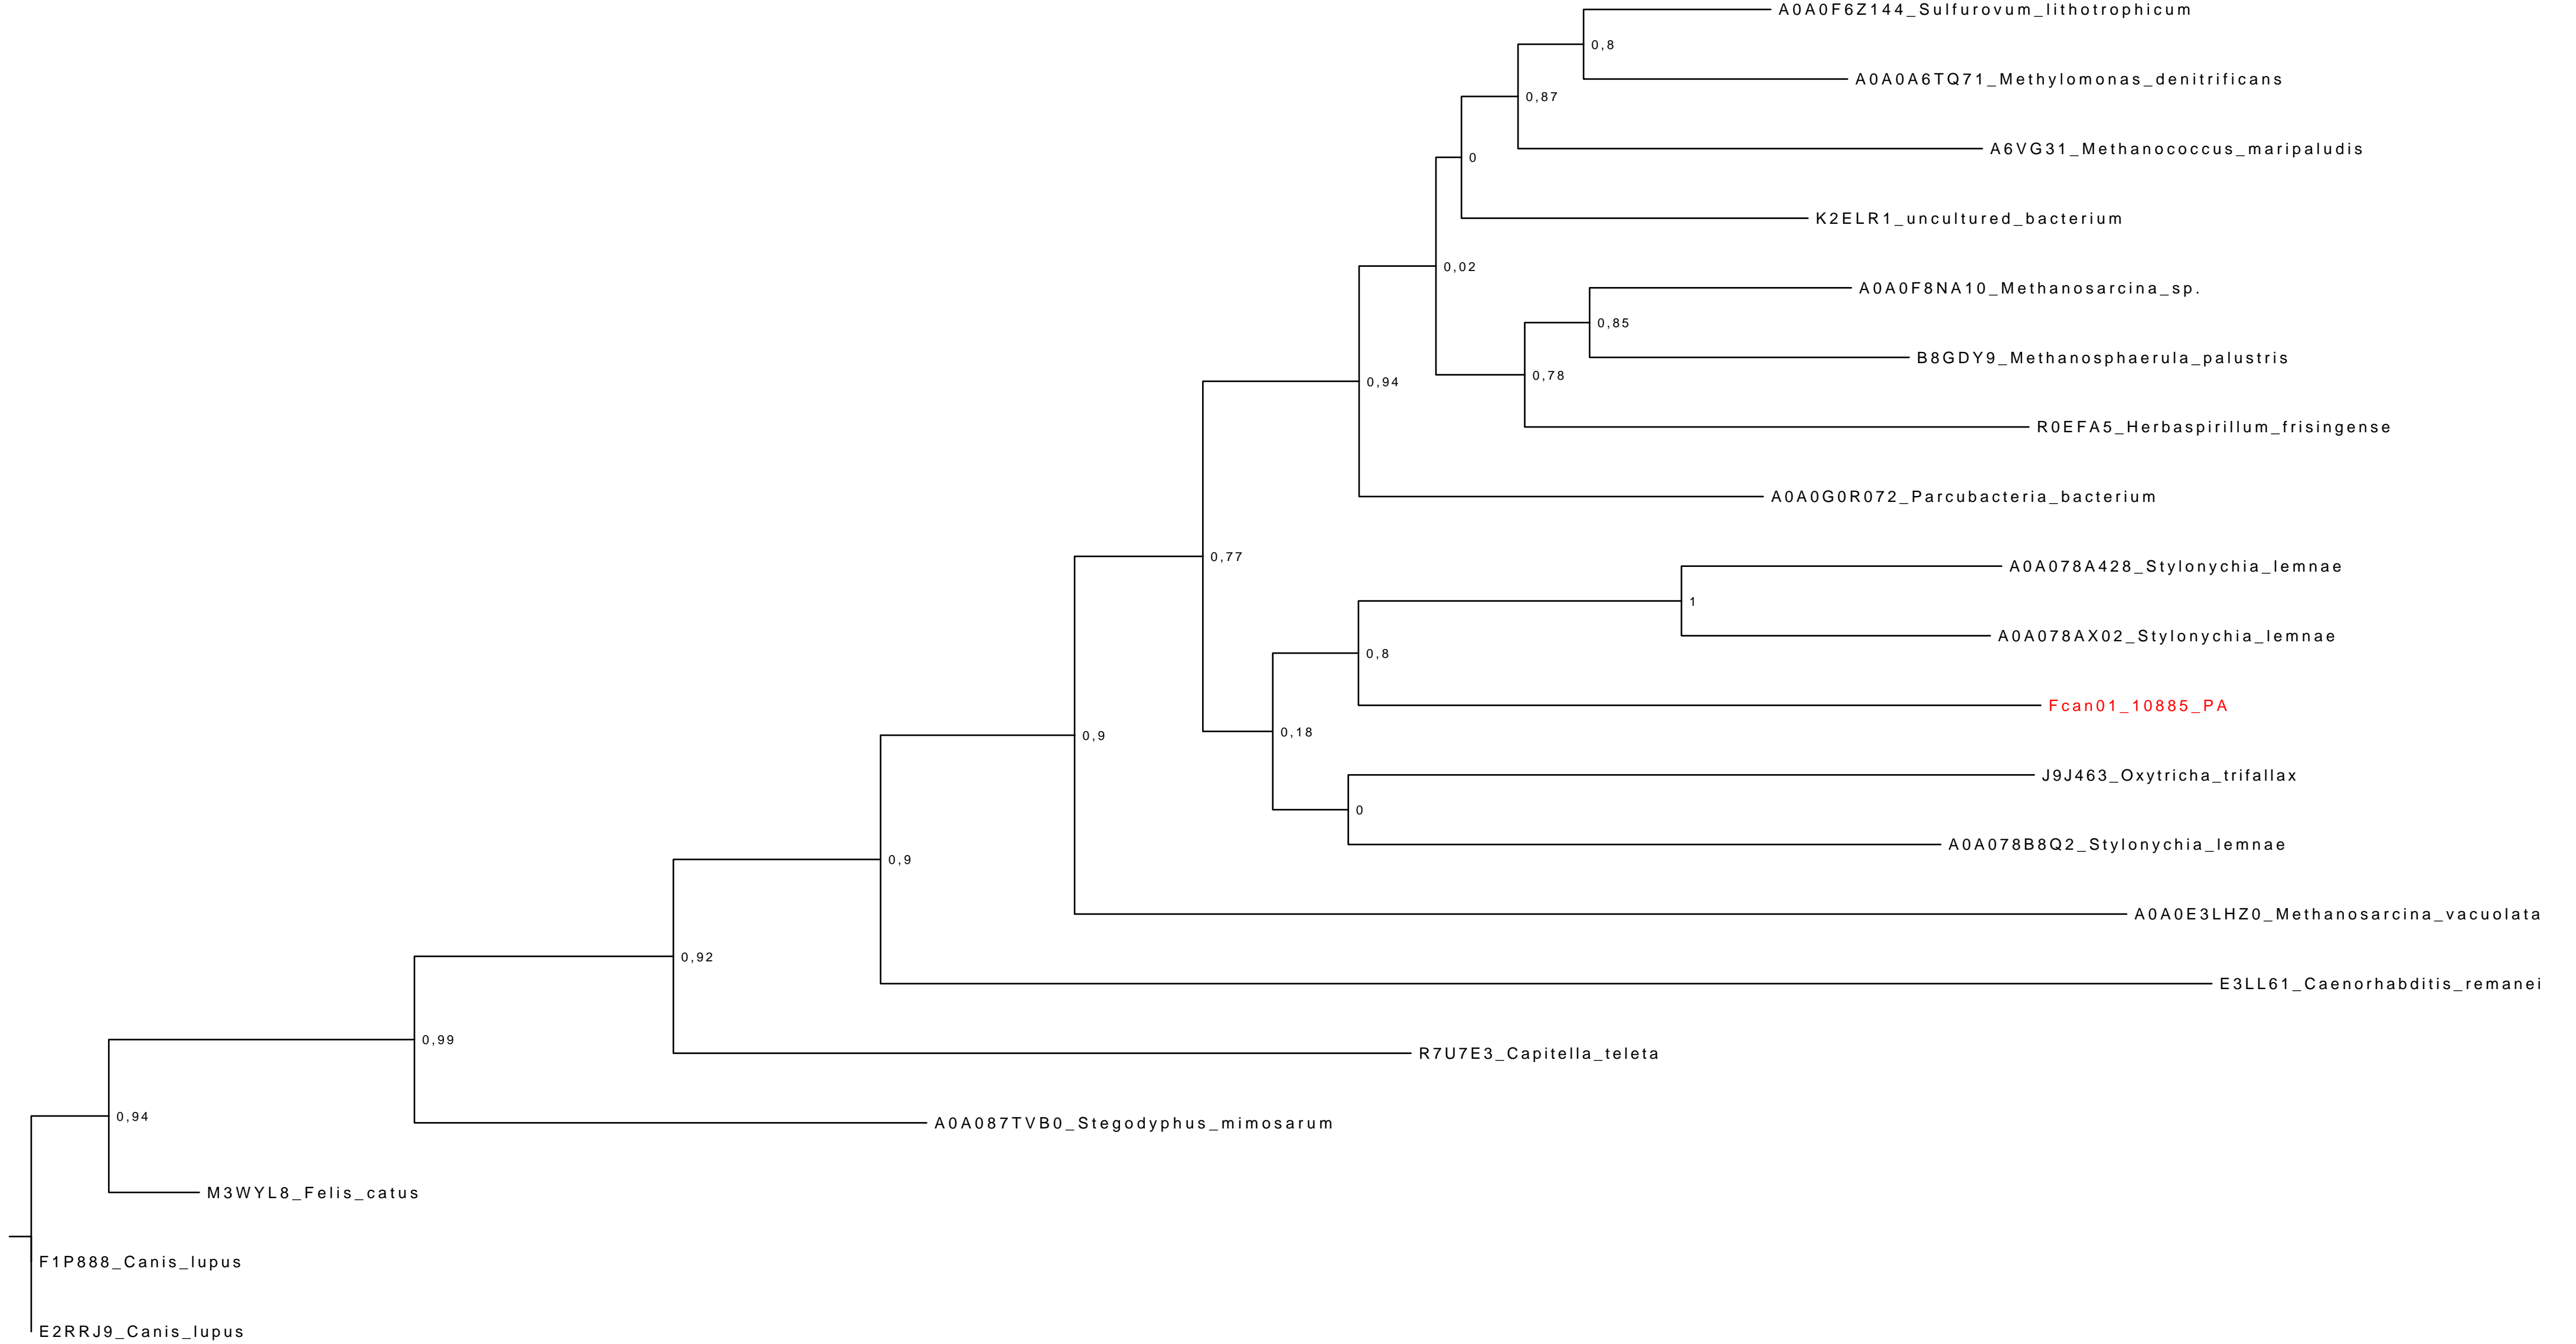

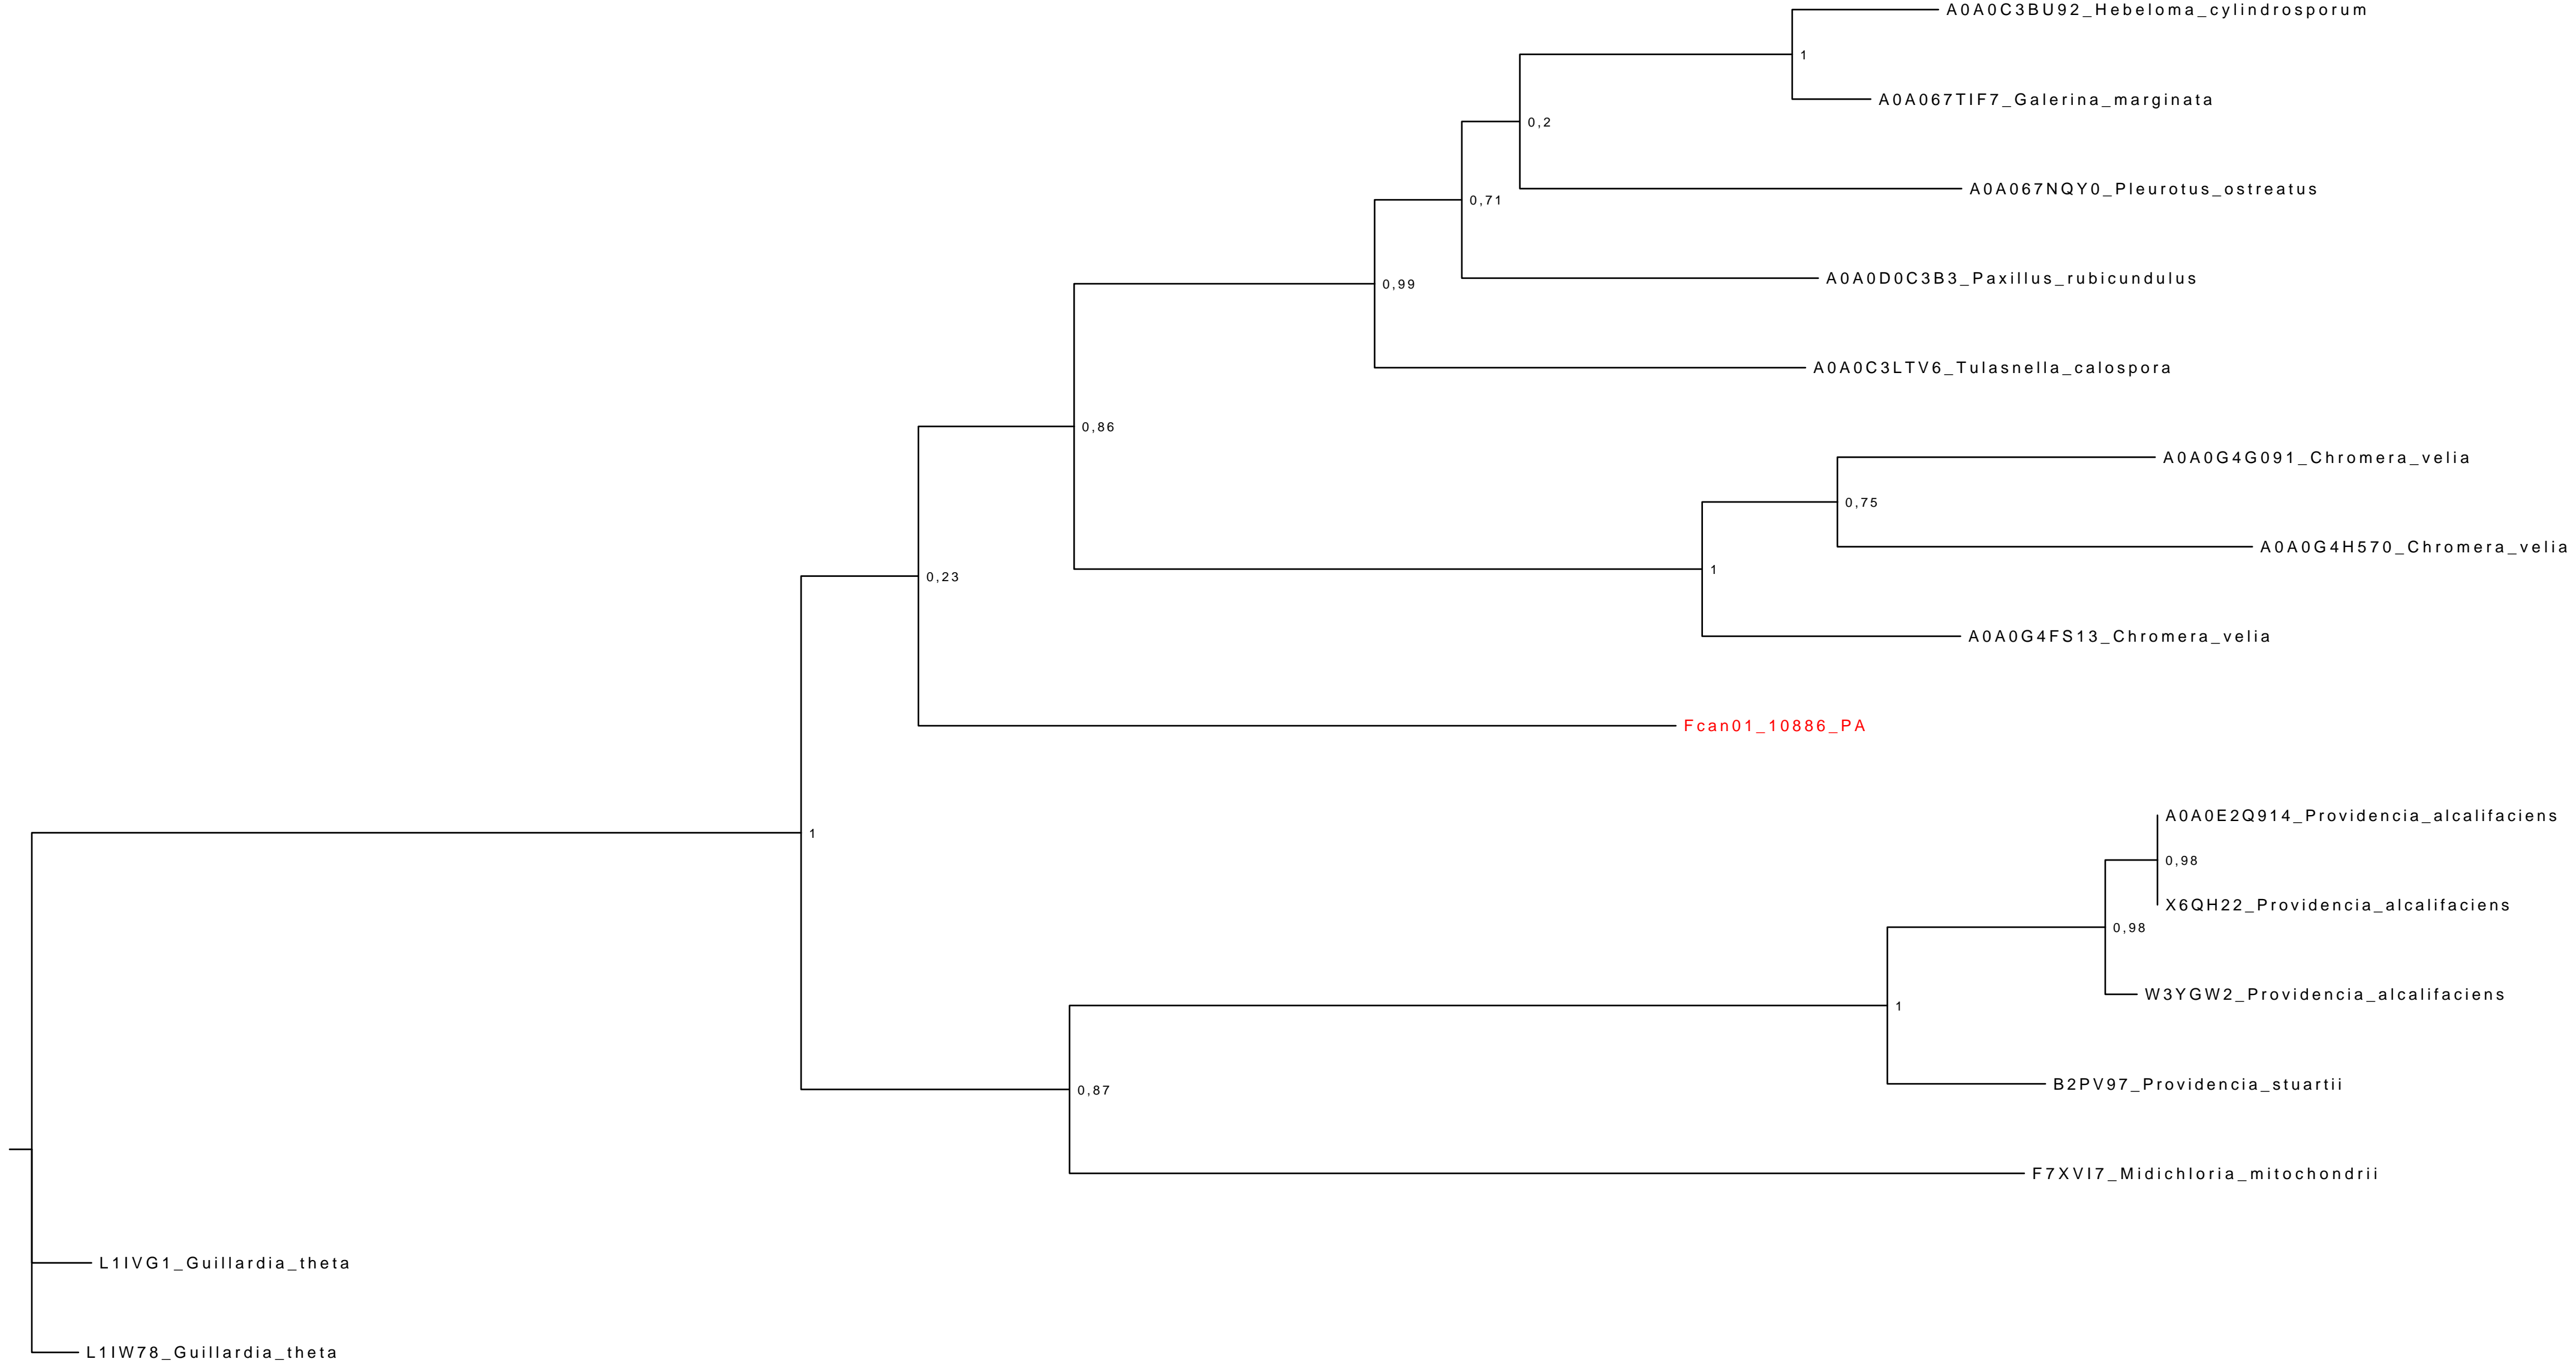

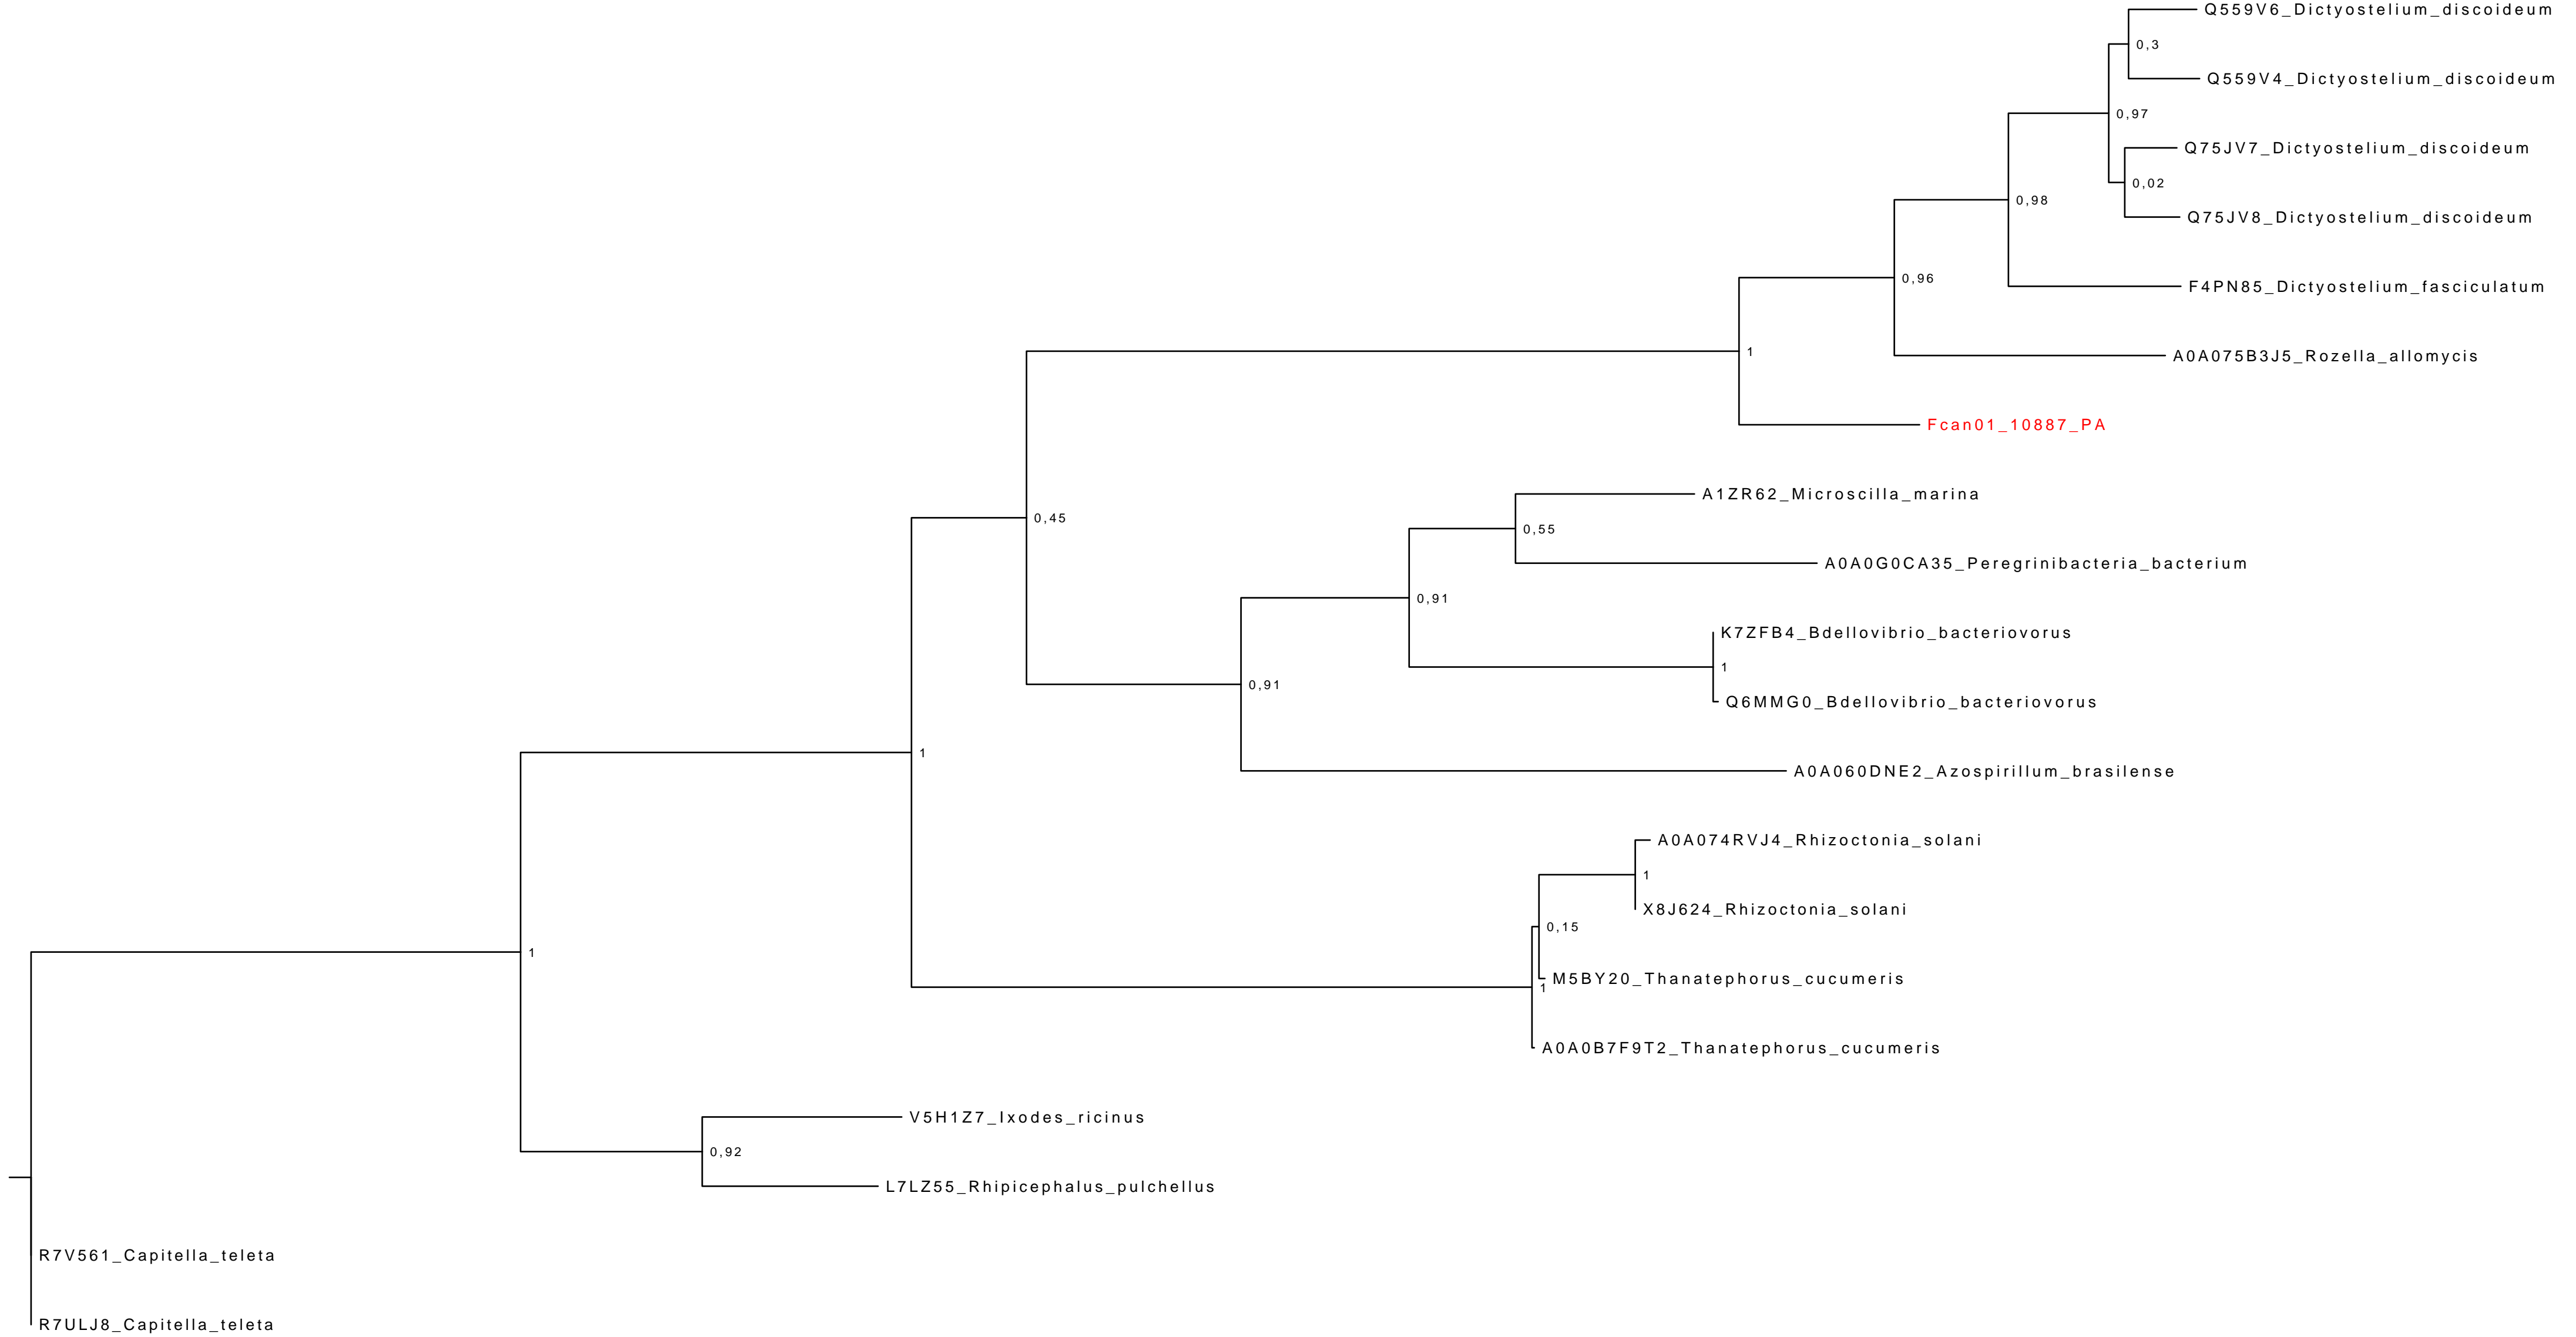

0.6

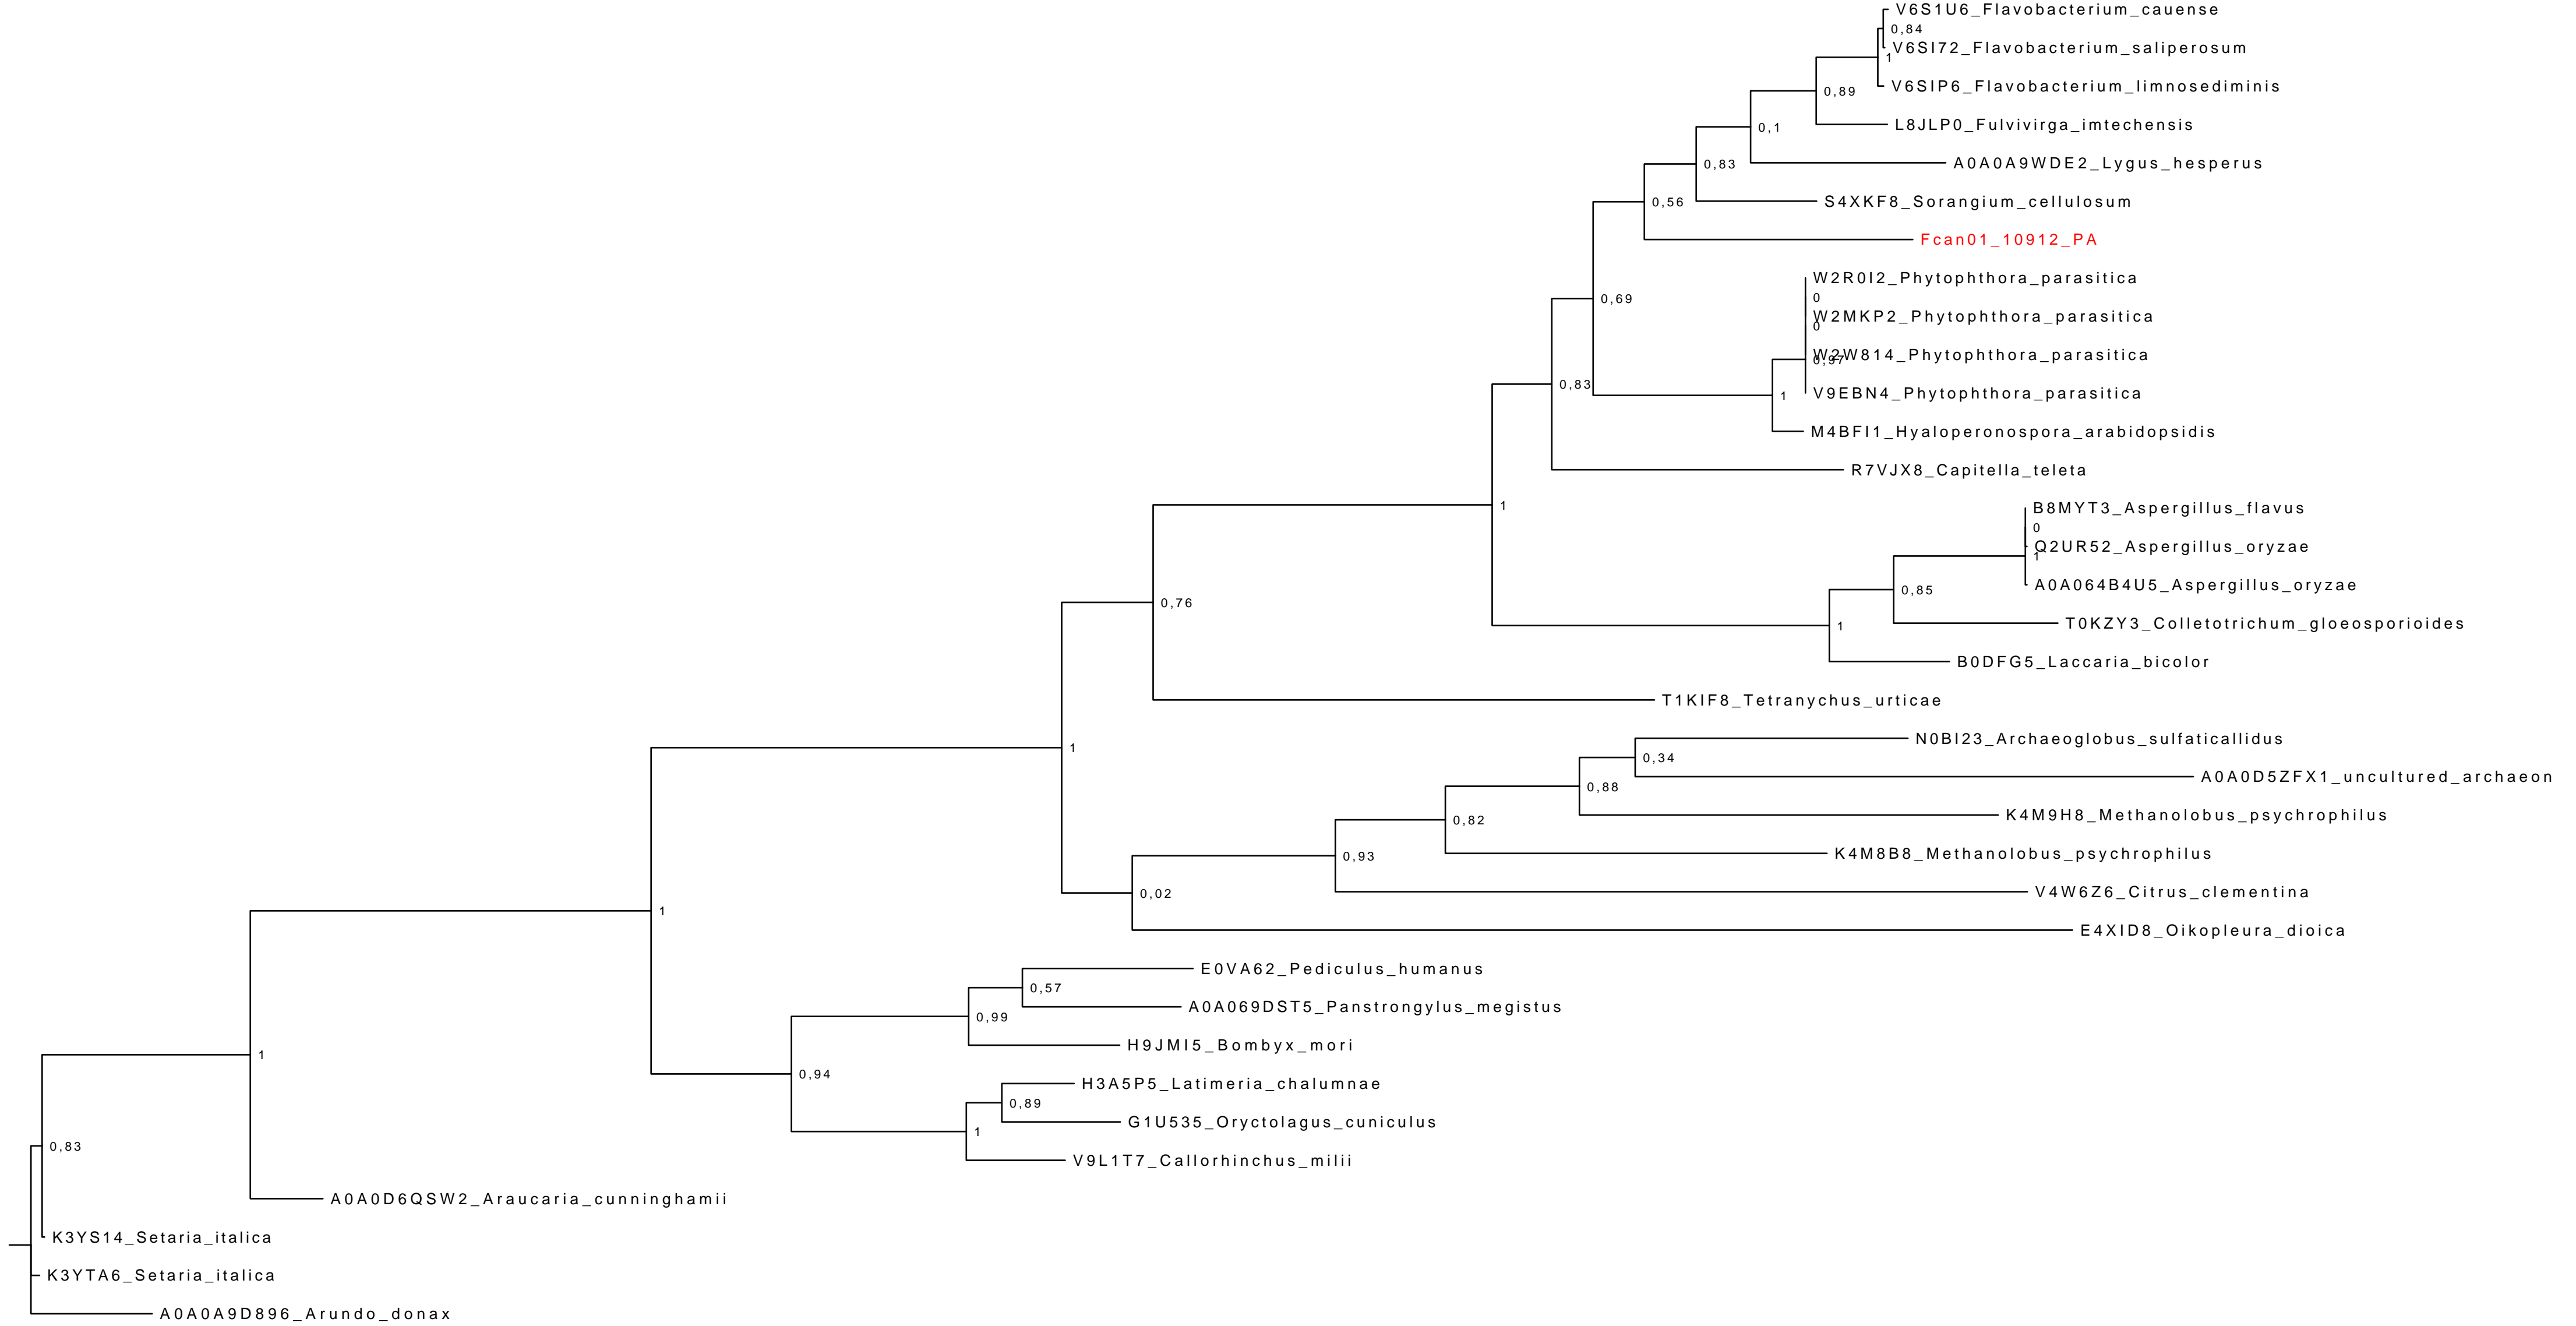

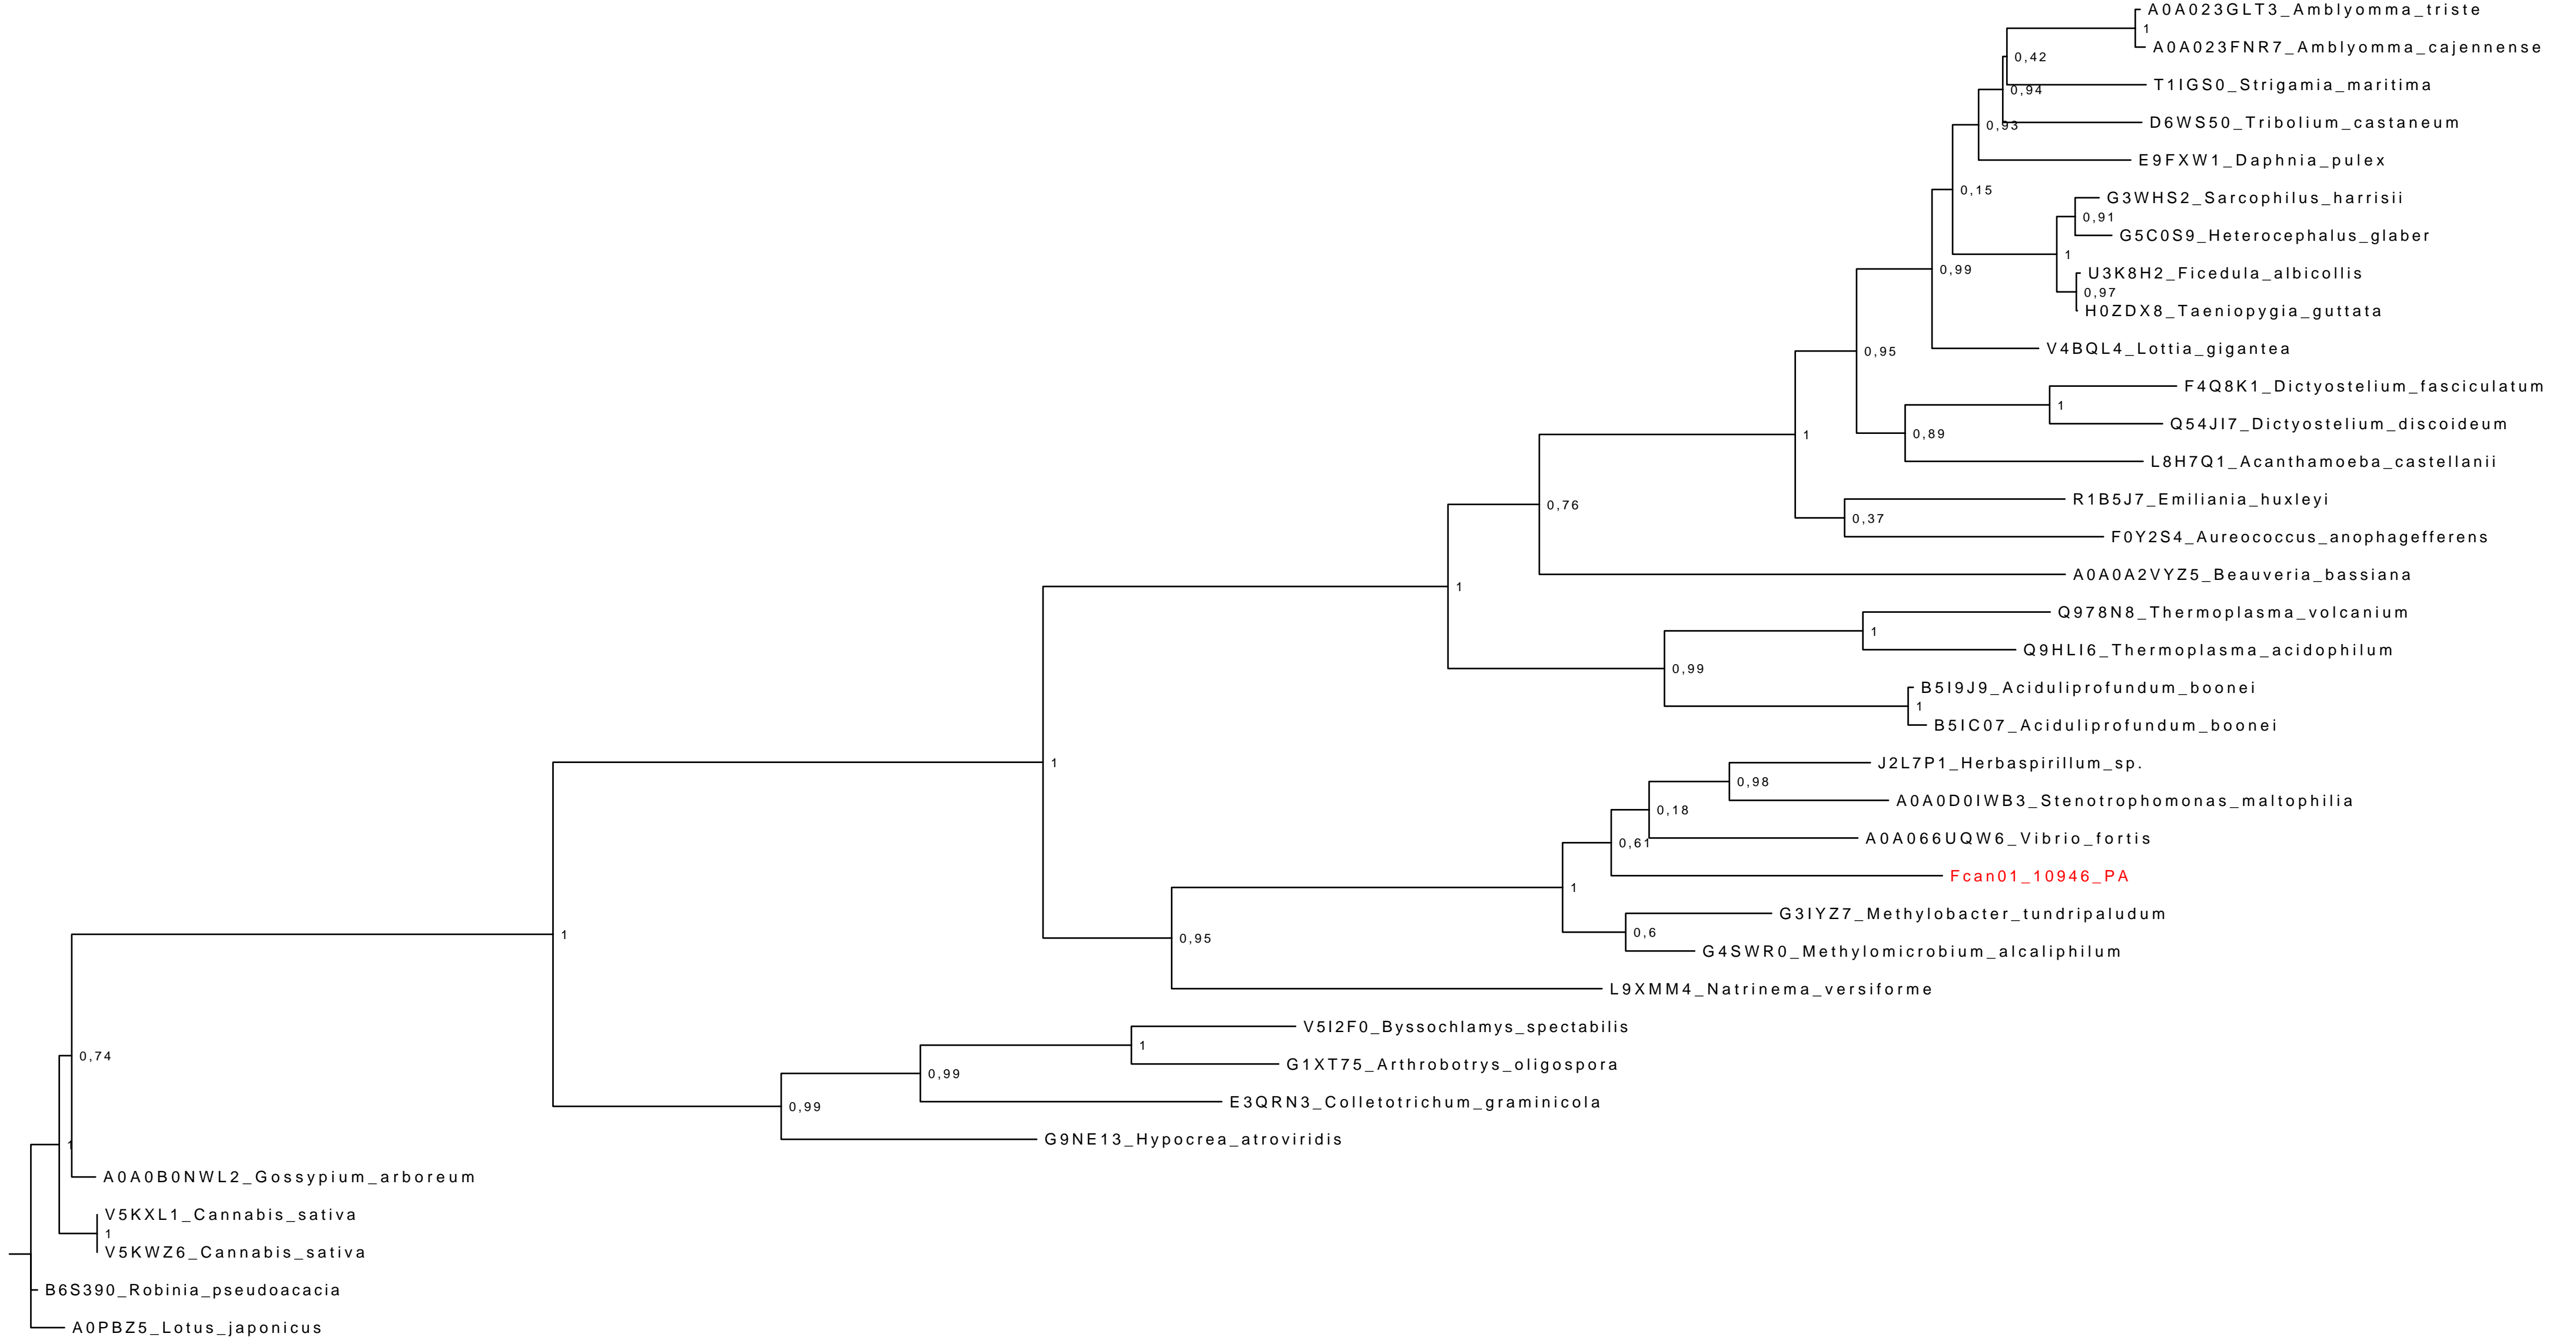

0.4

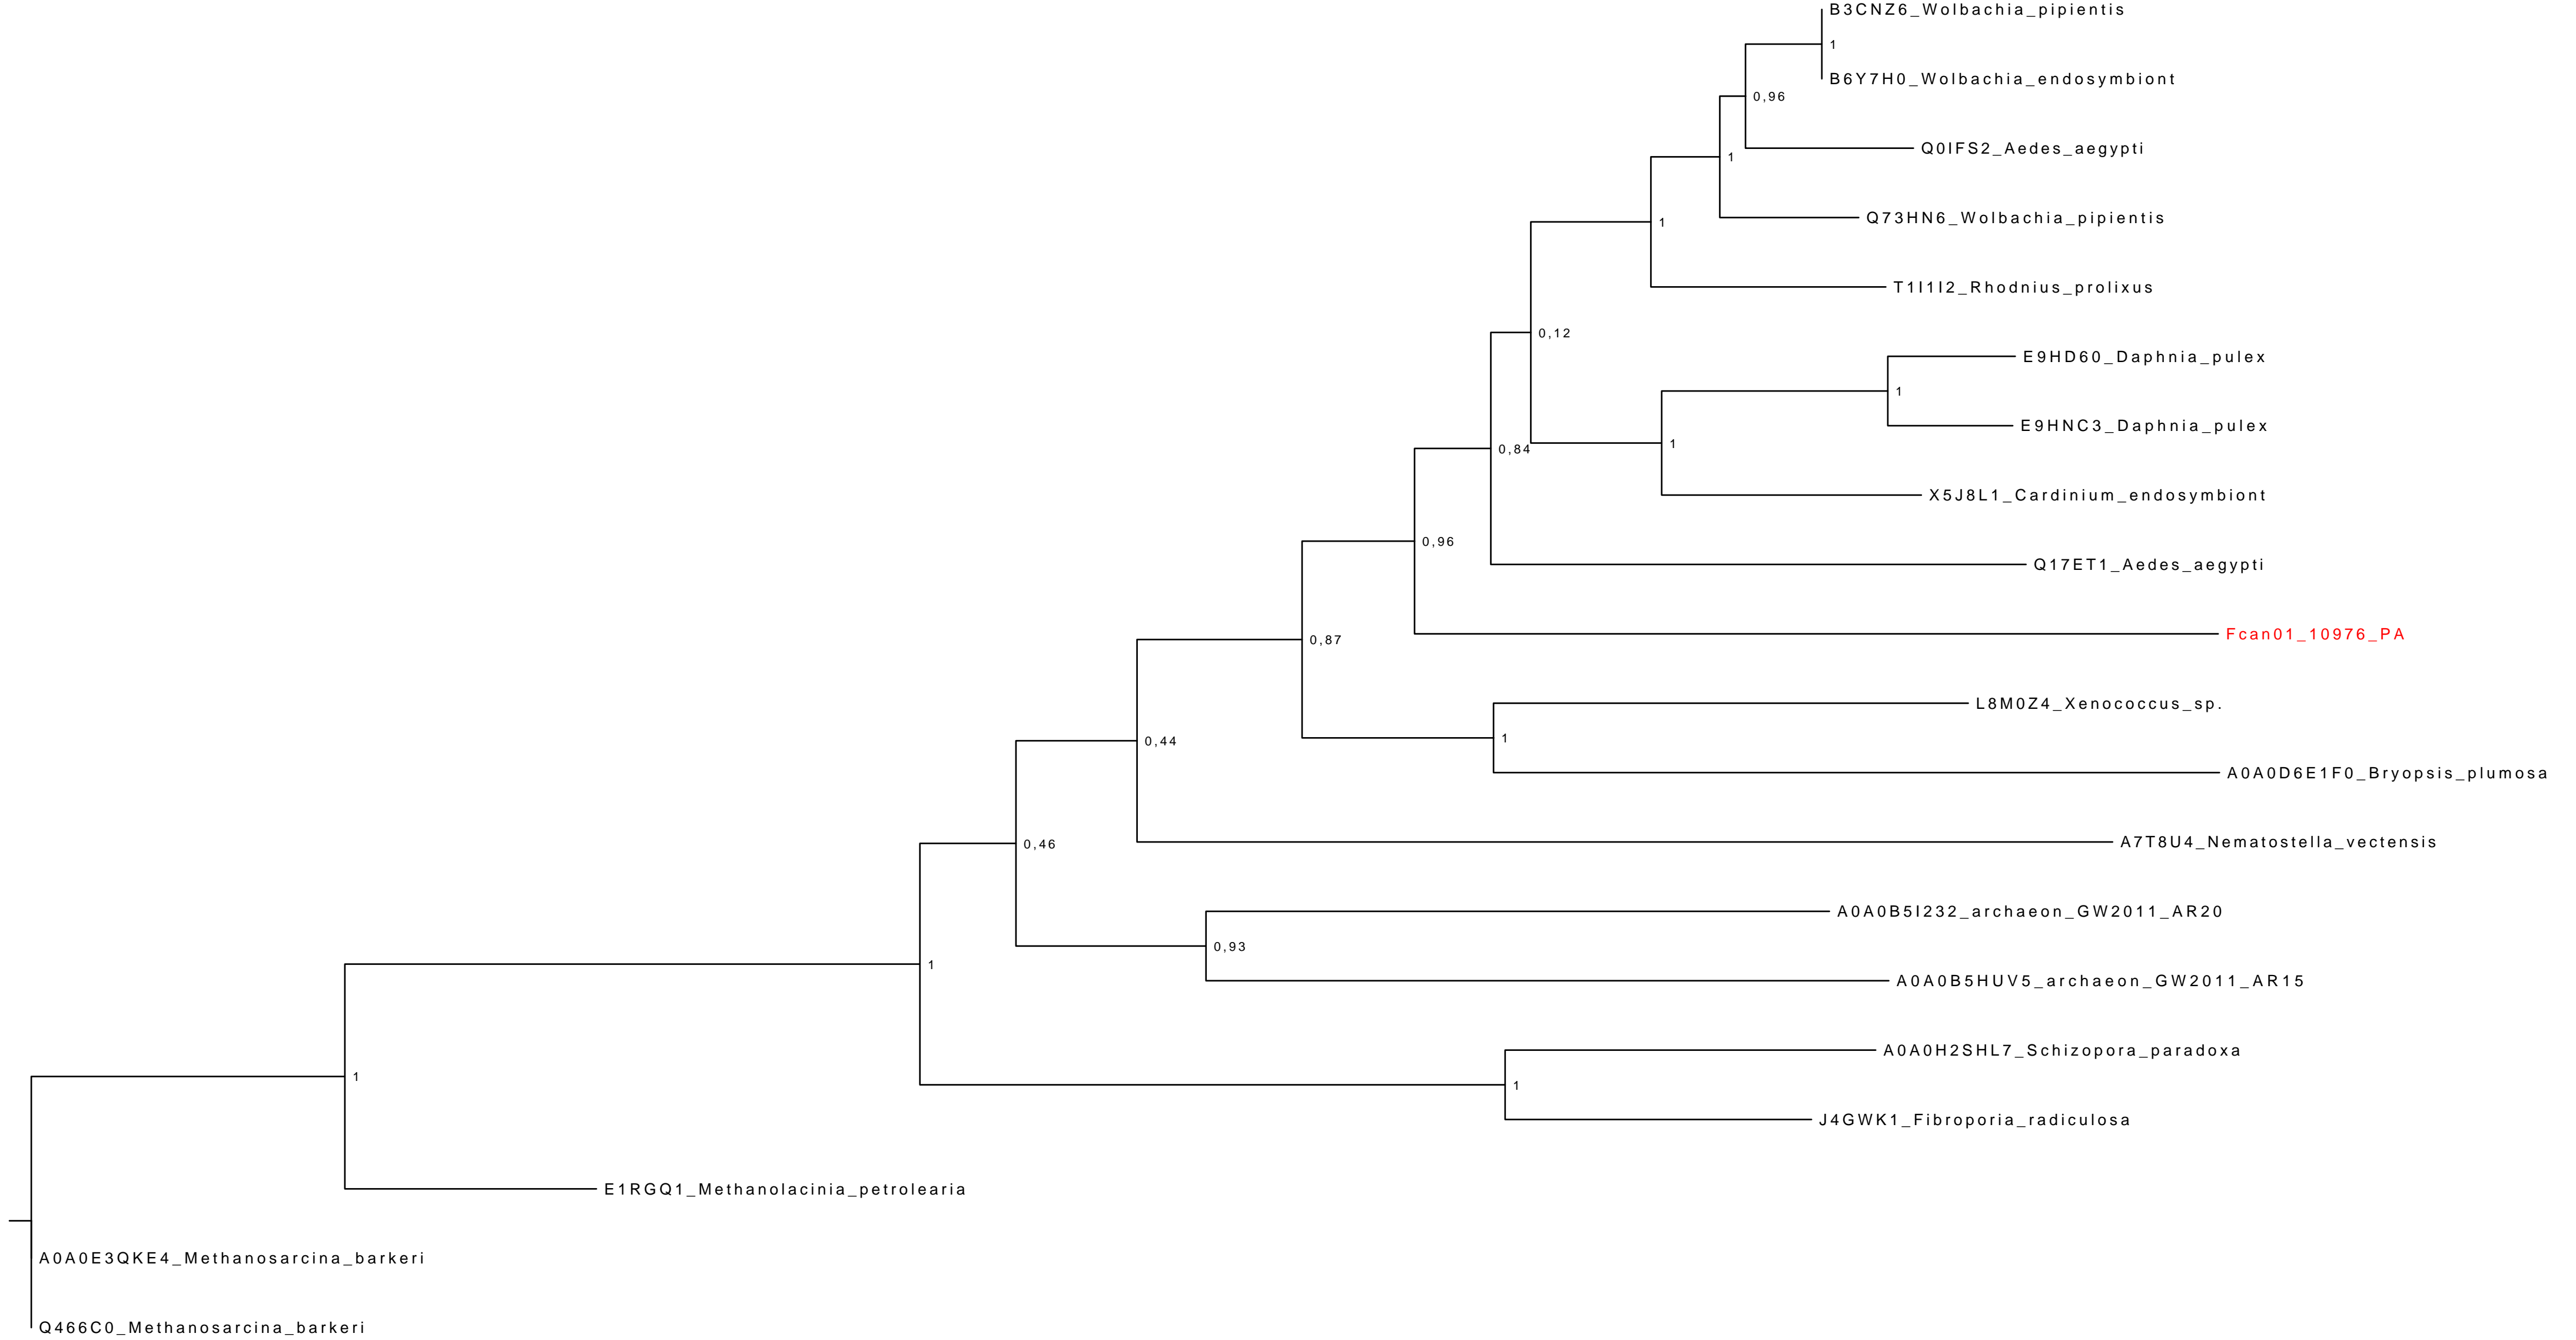

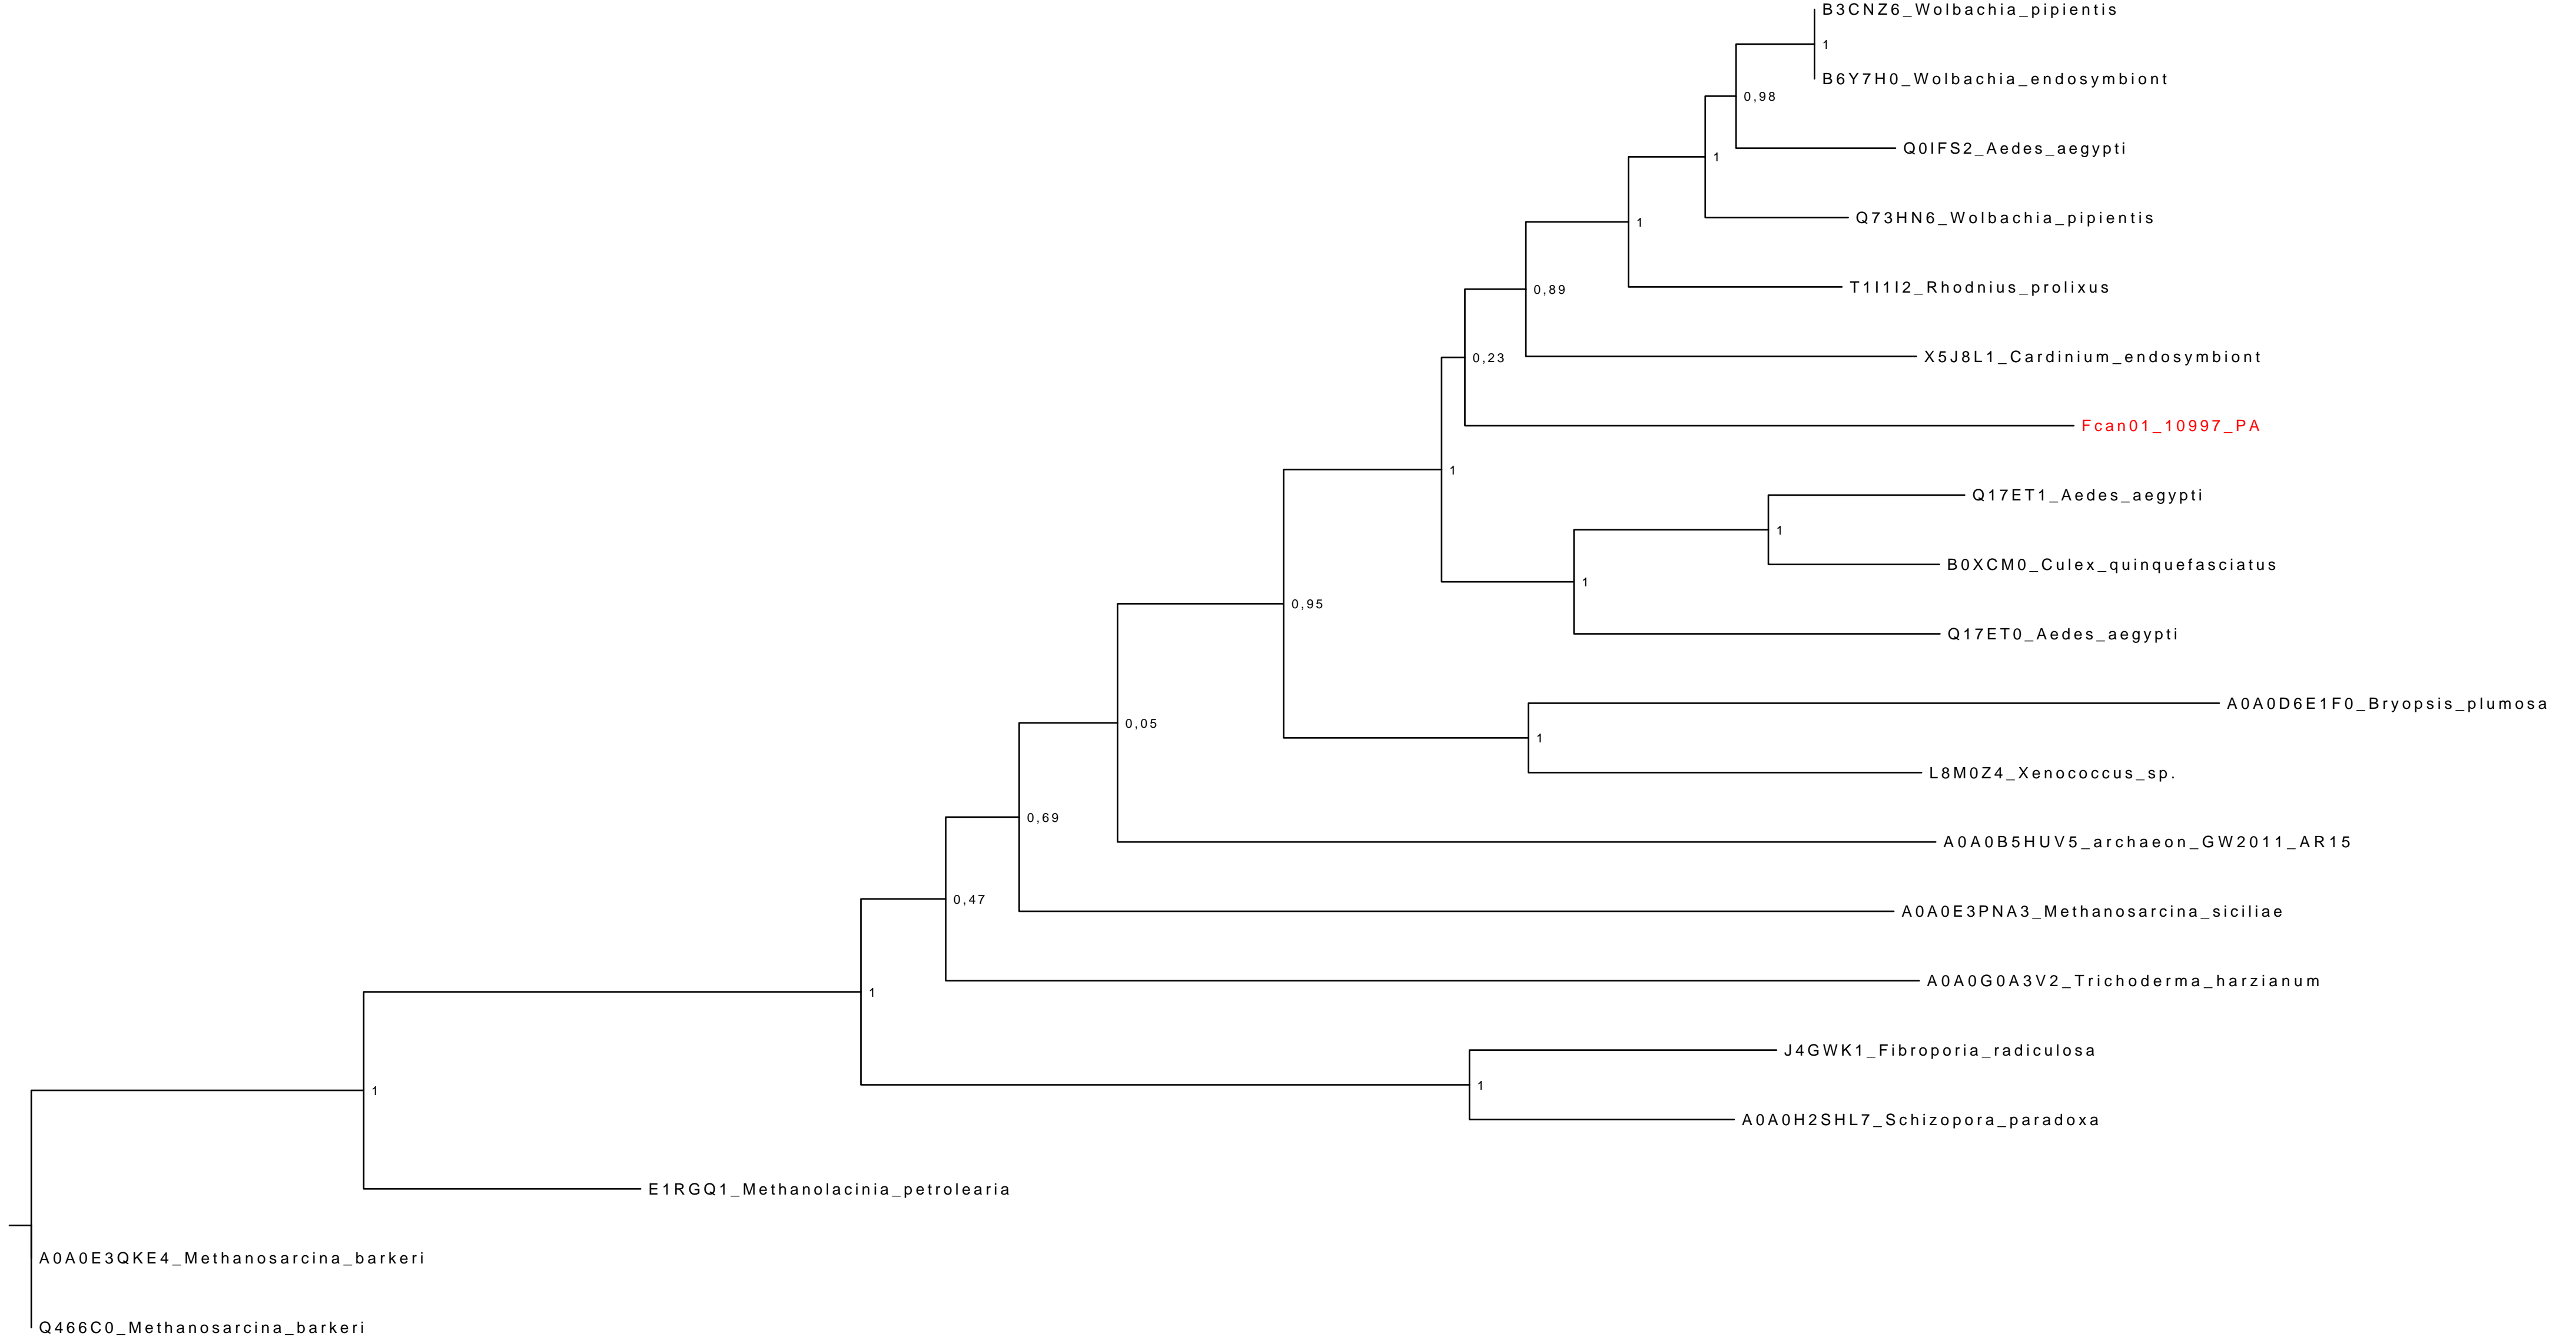

0.5

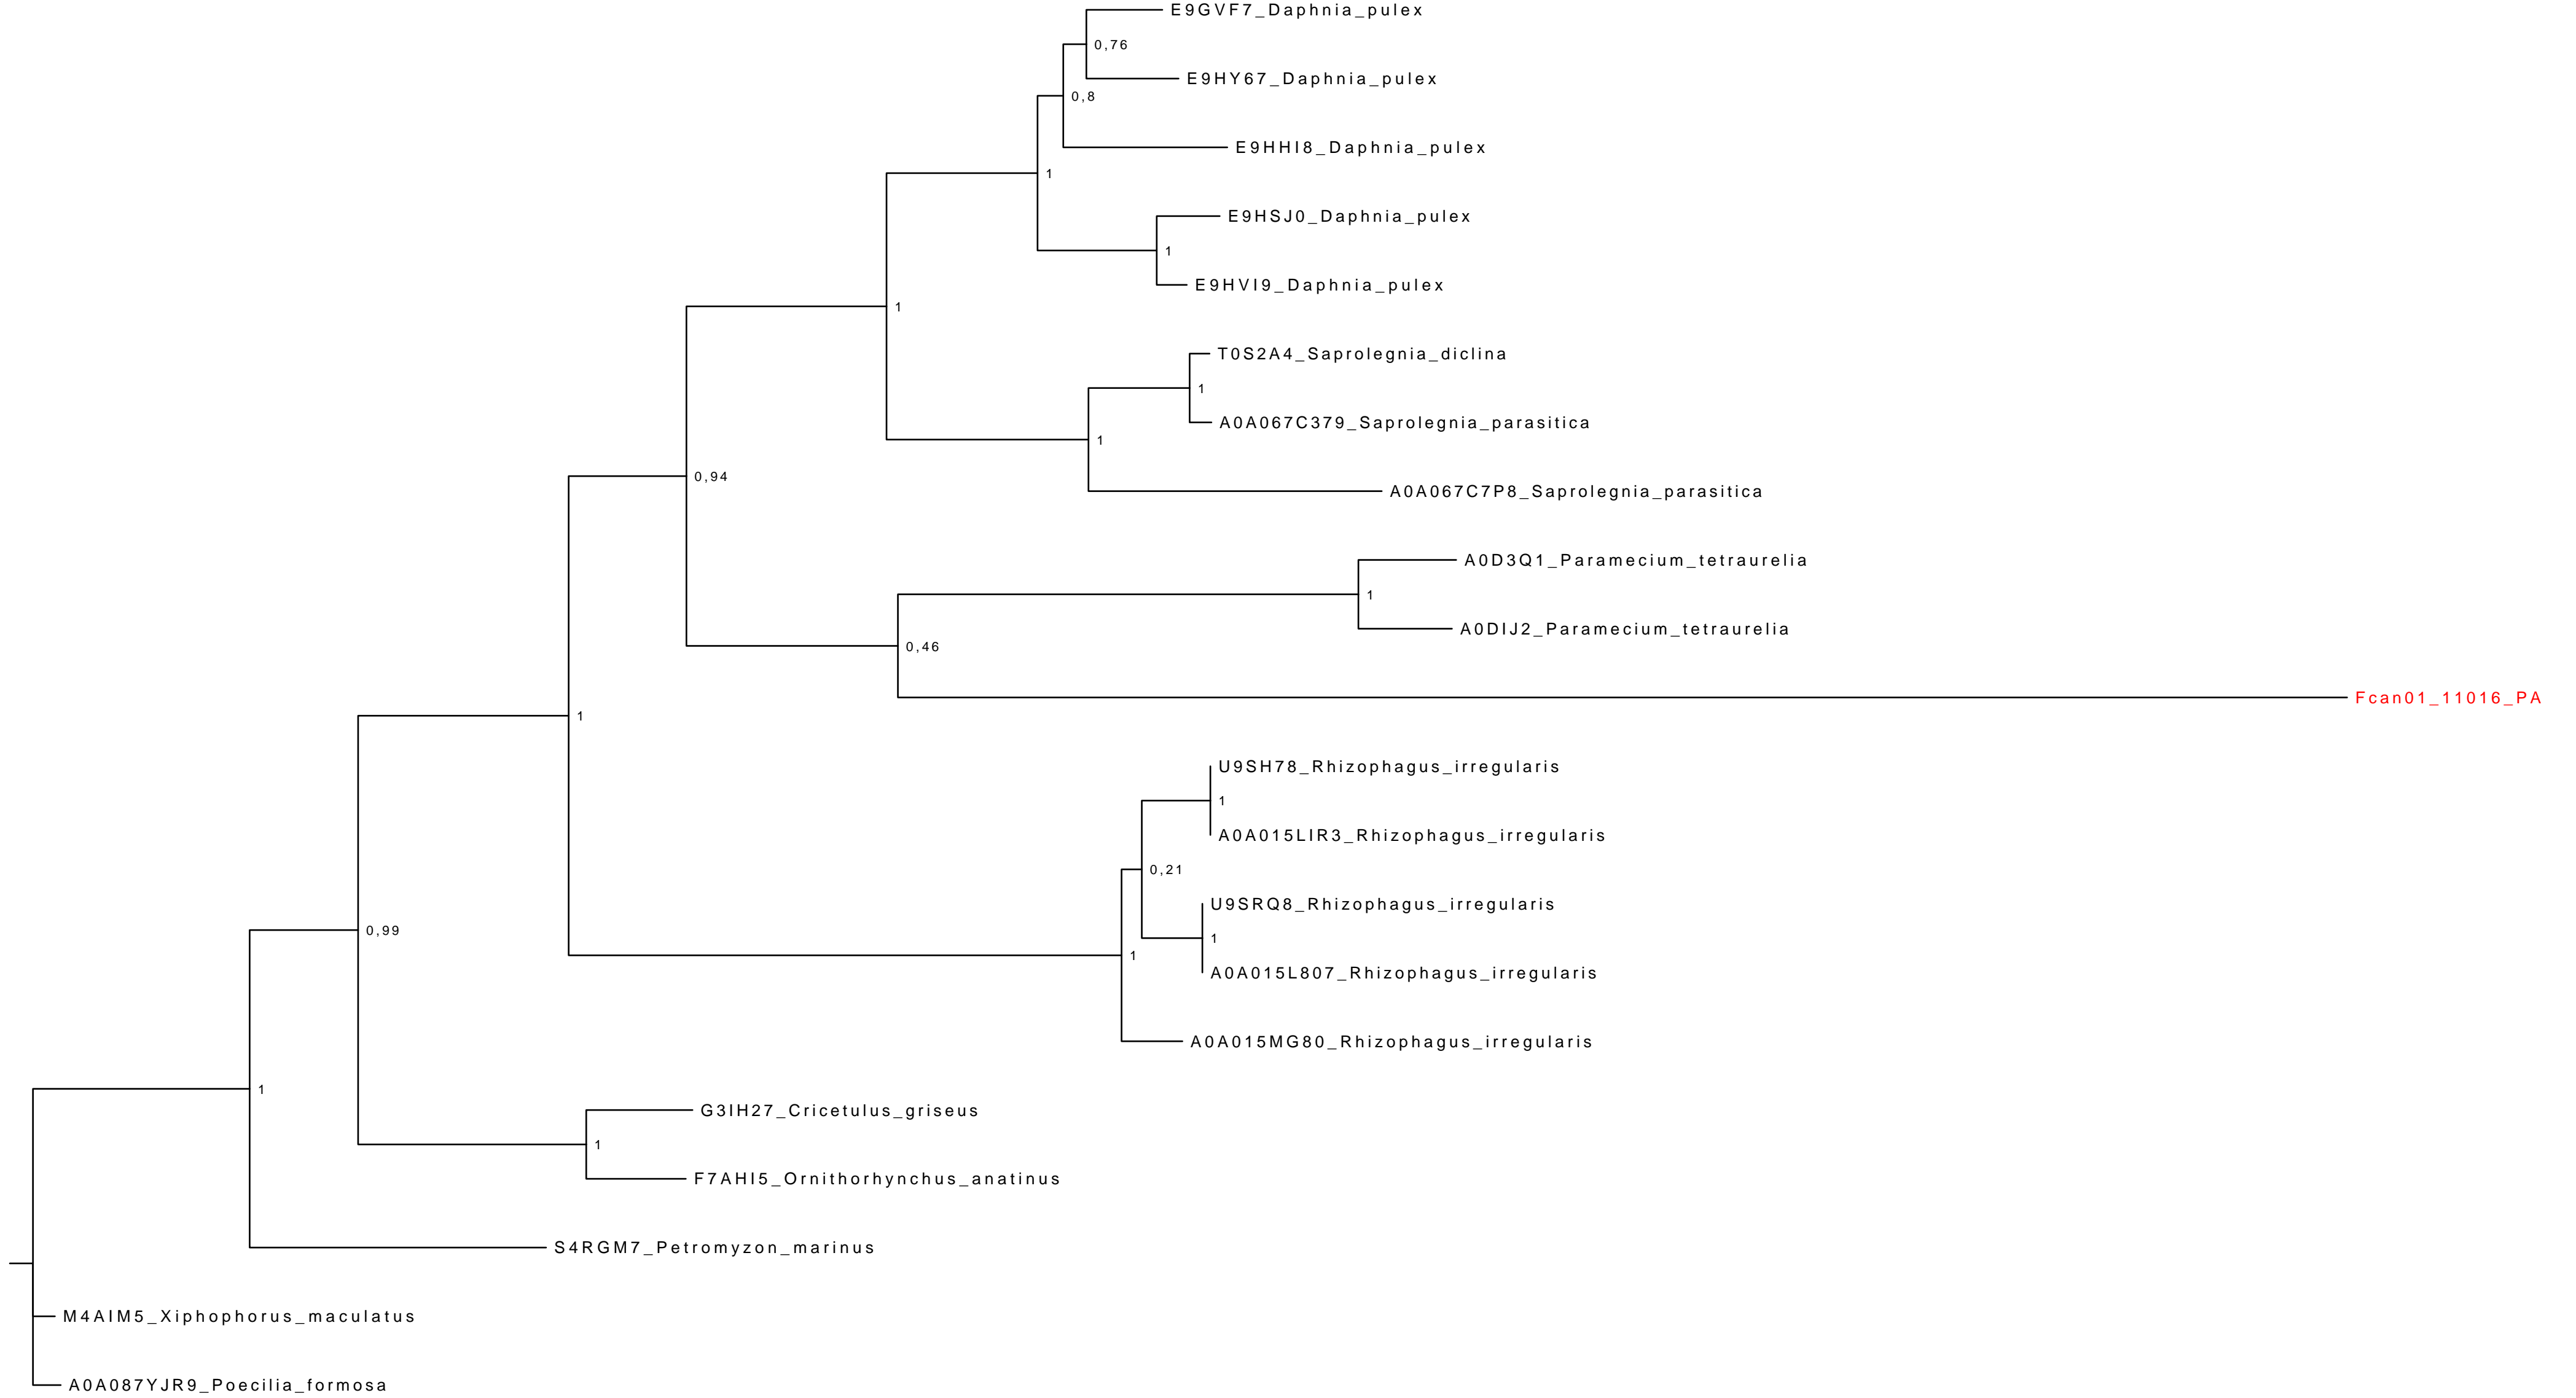

1.0



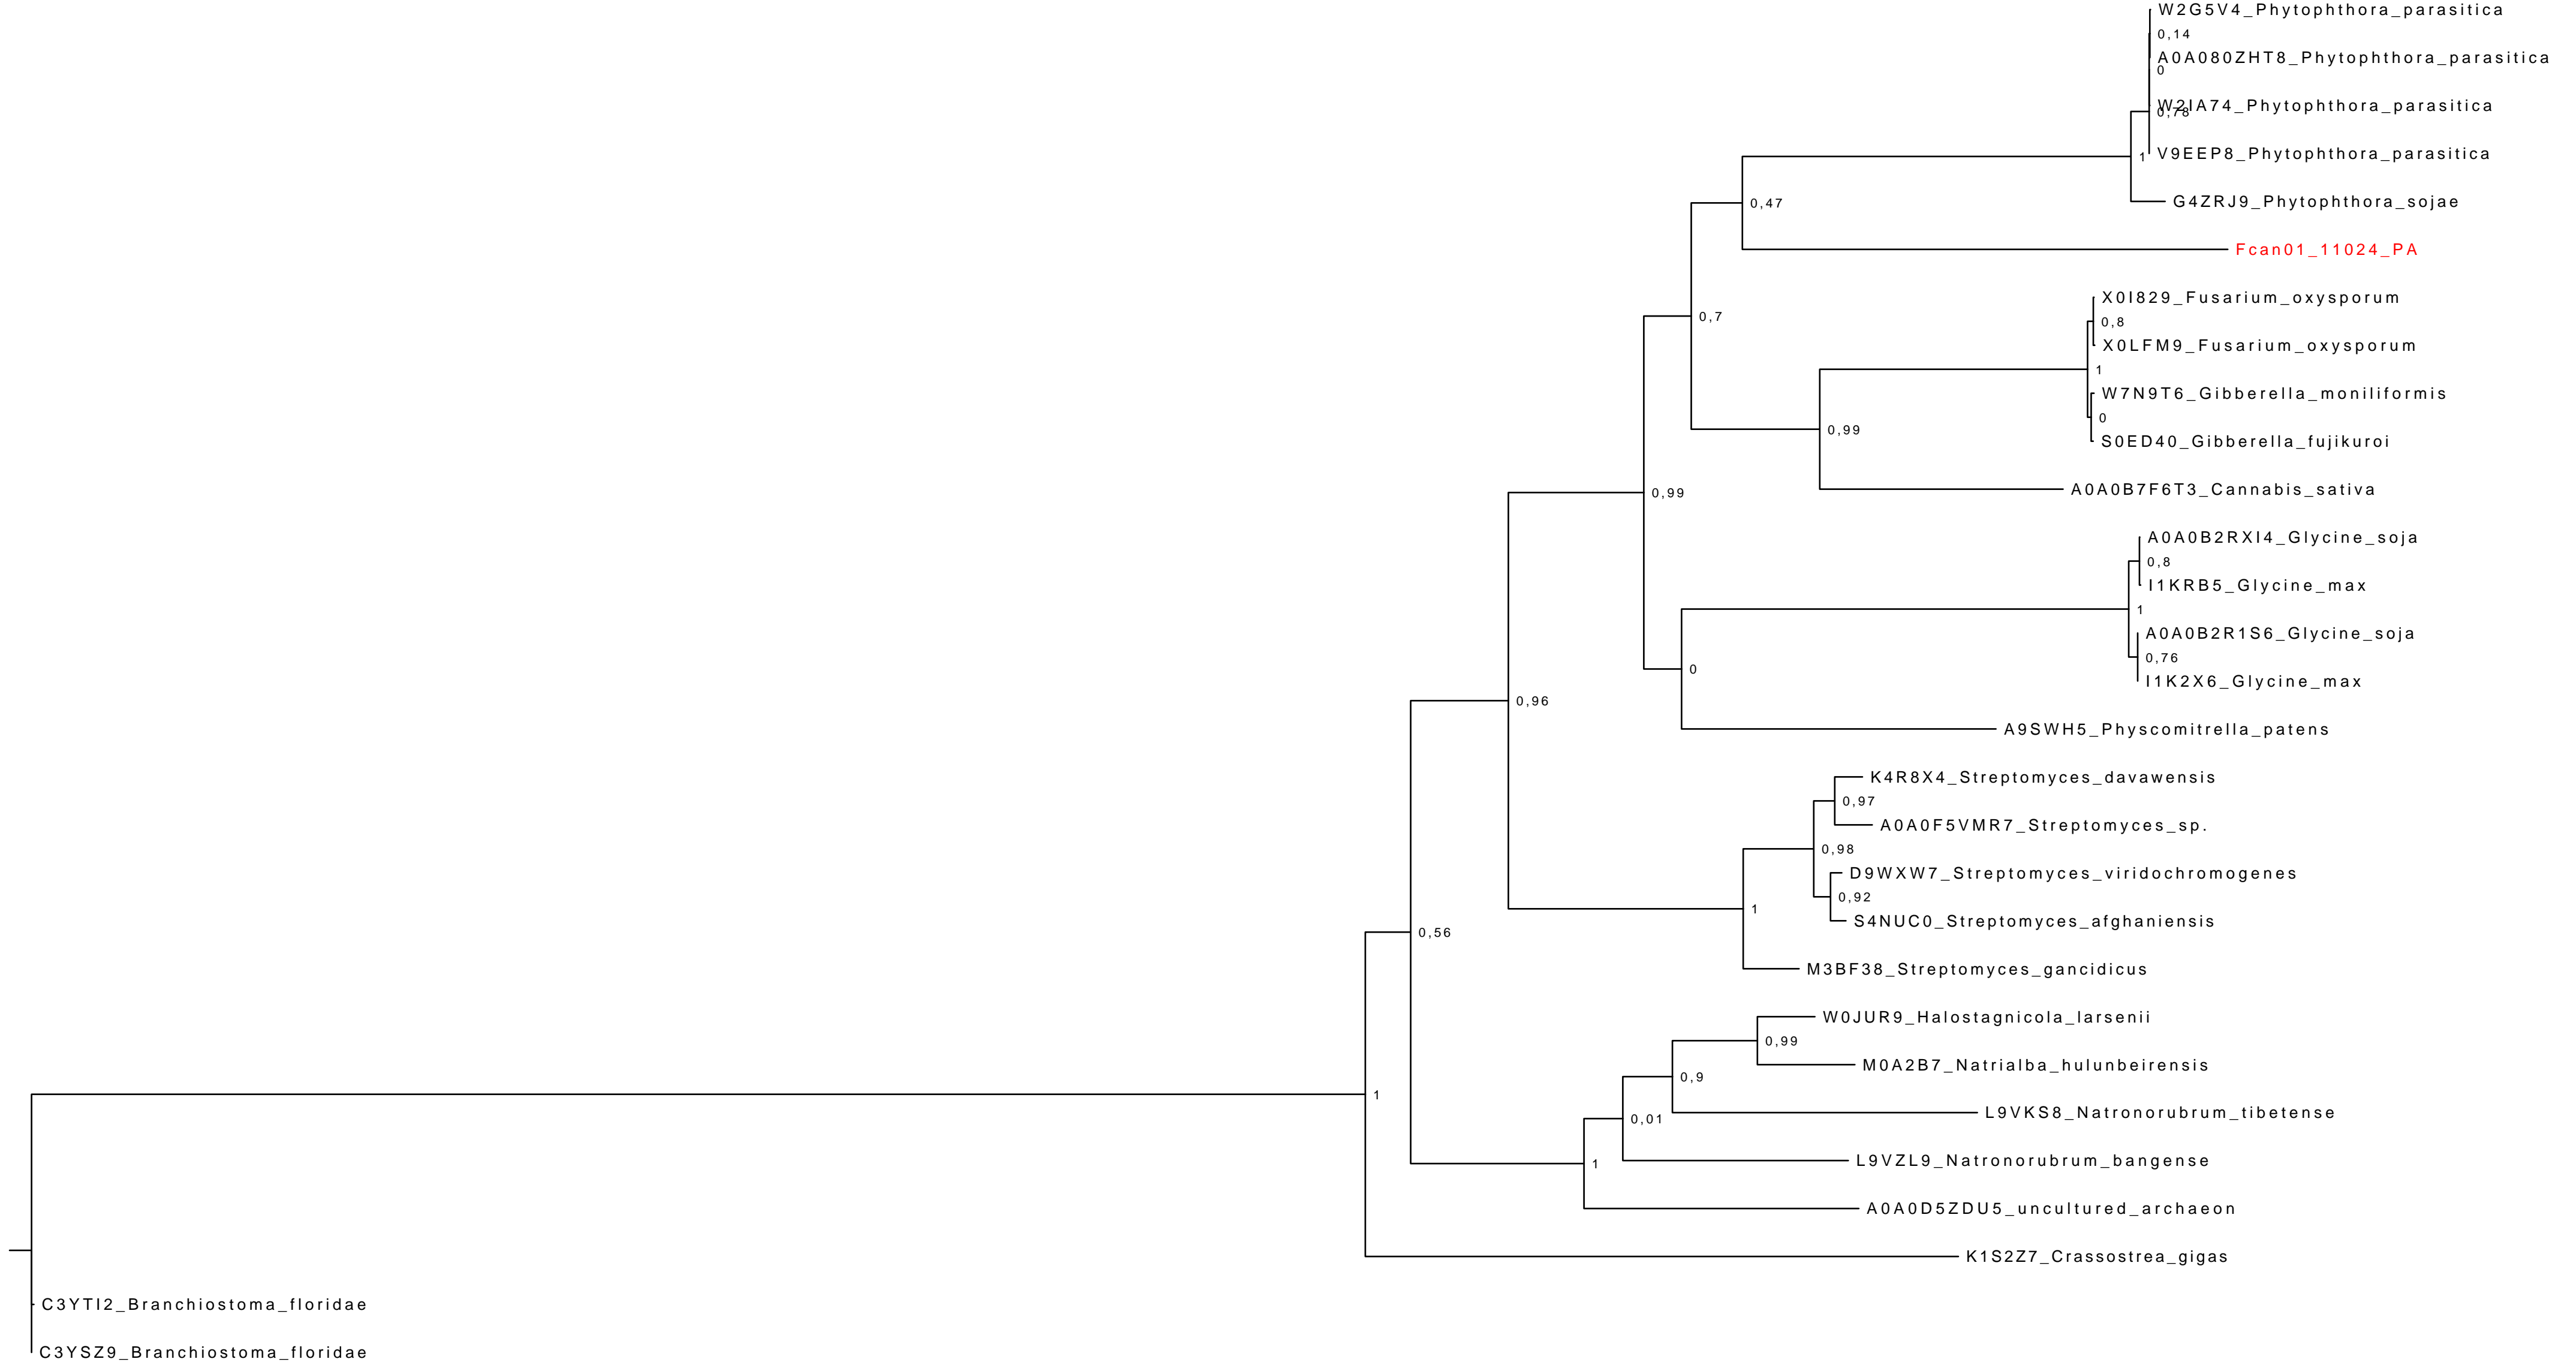

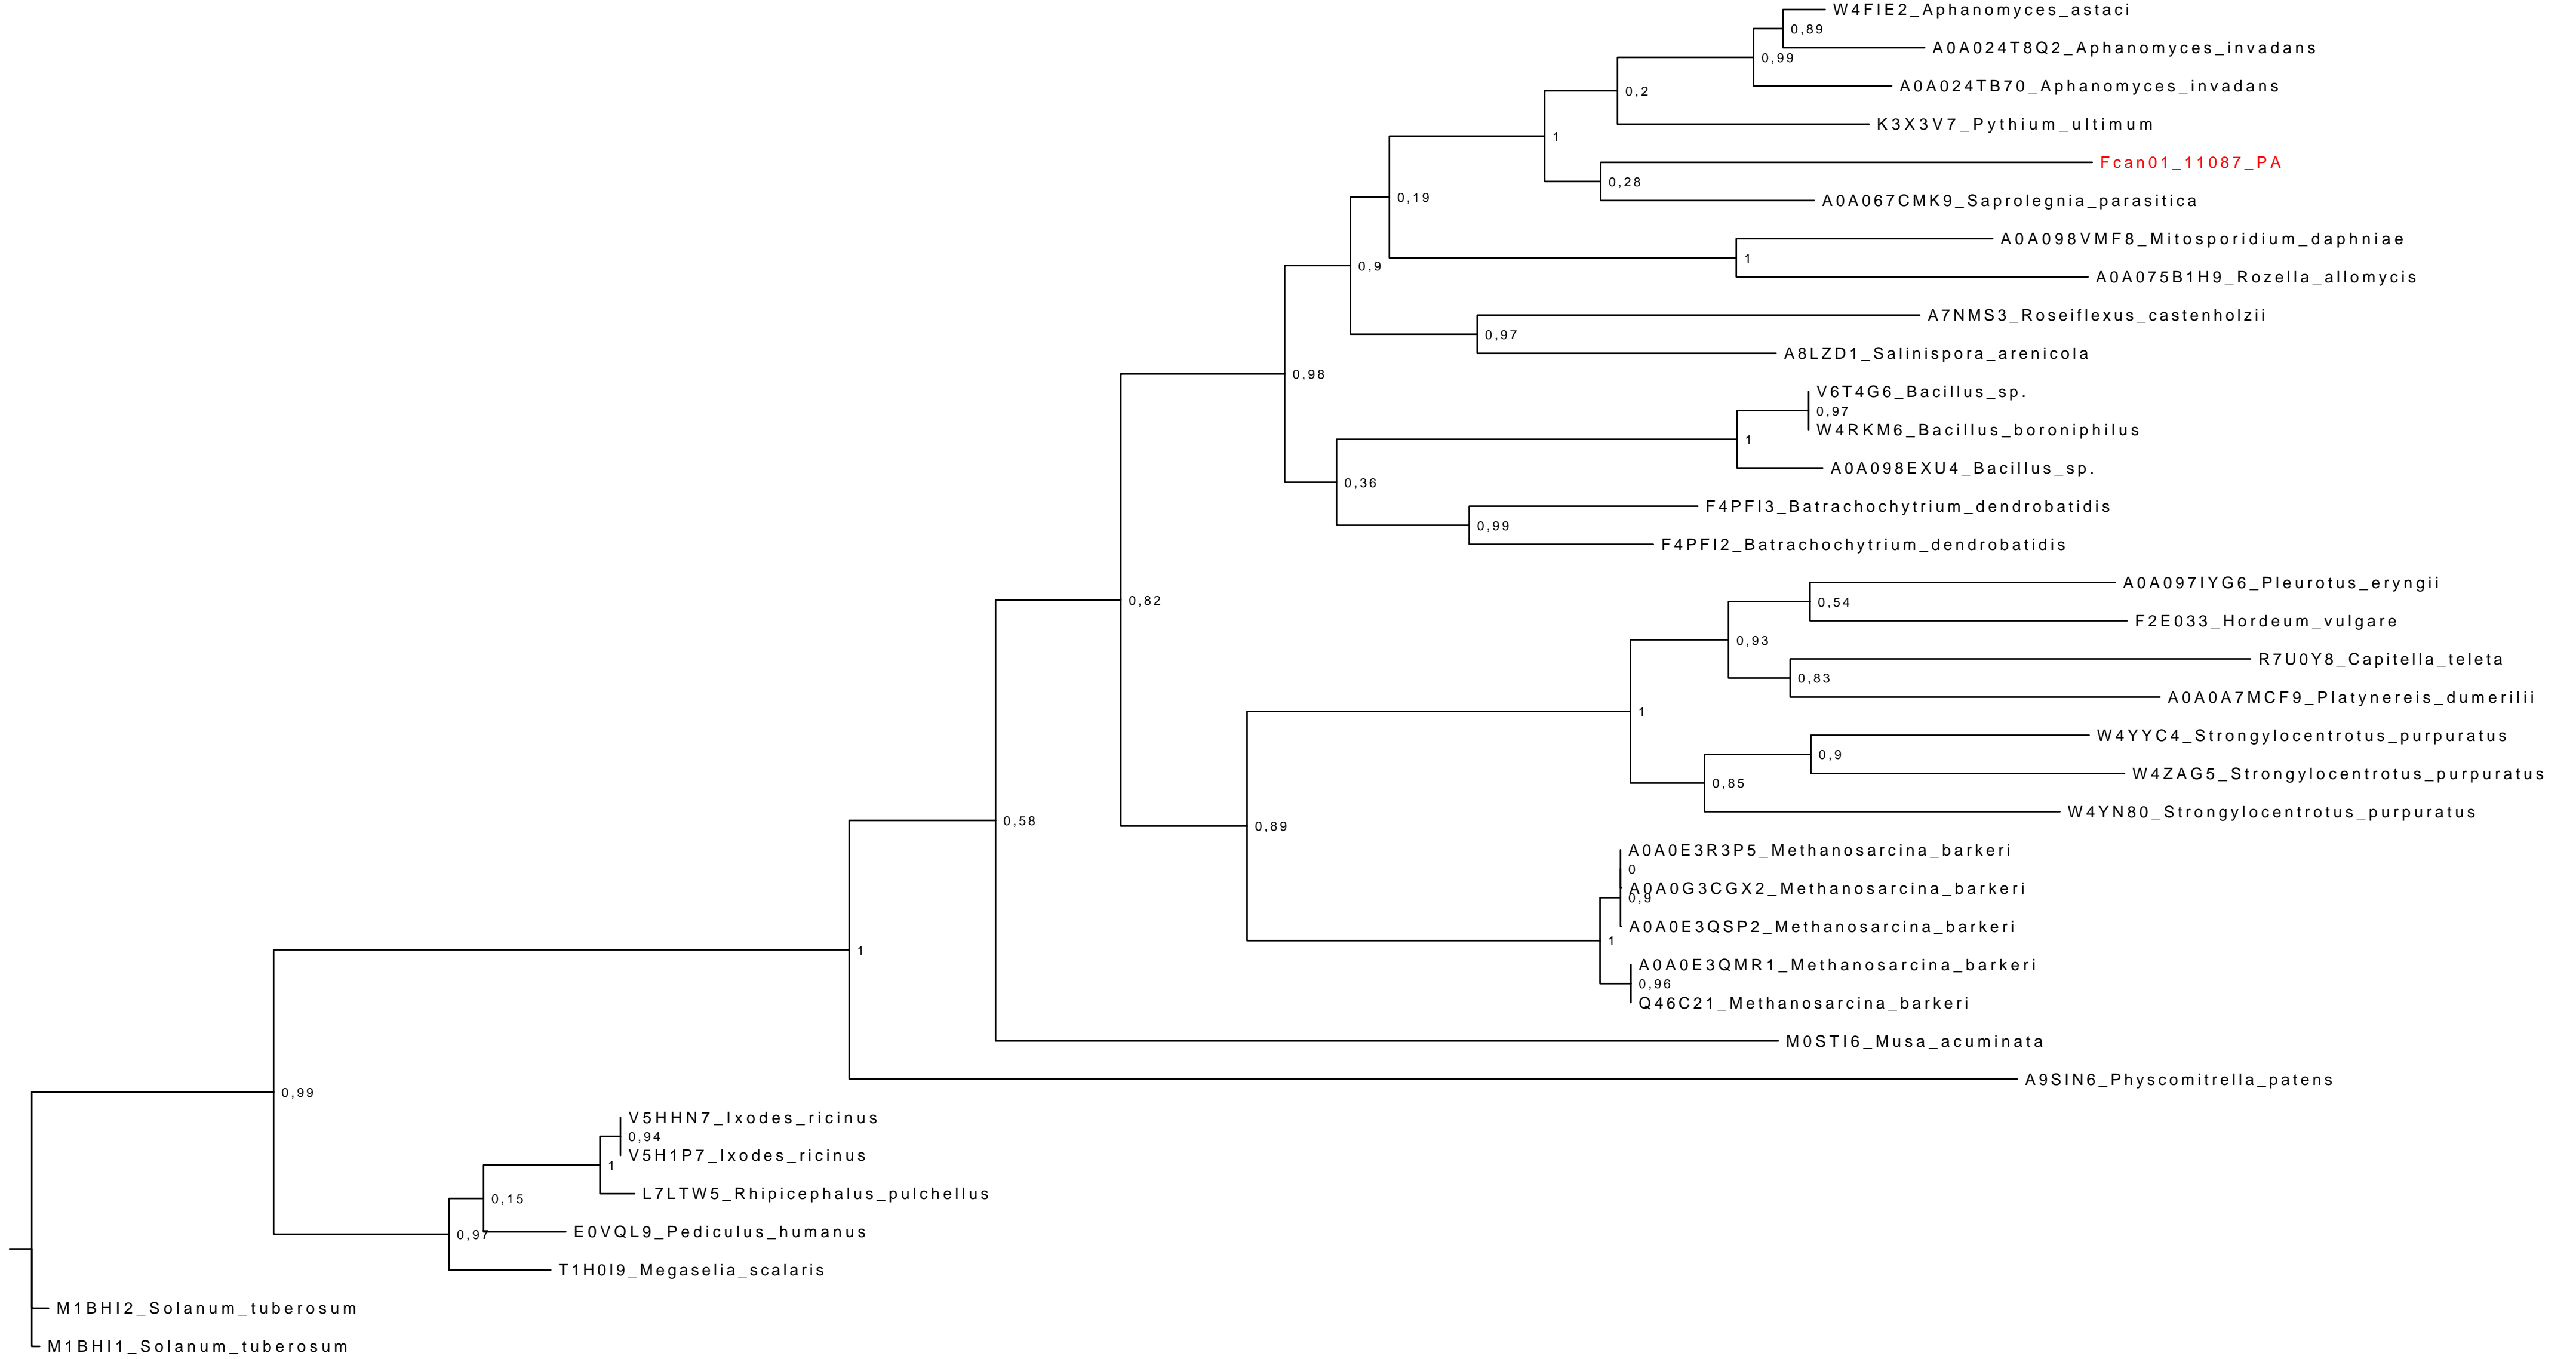

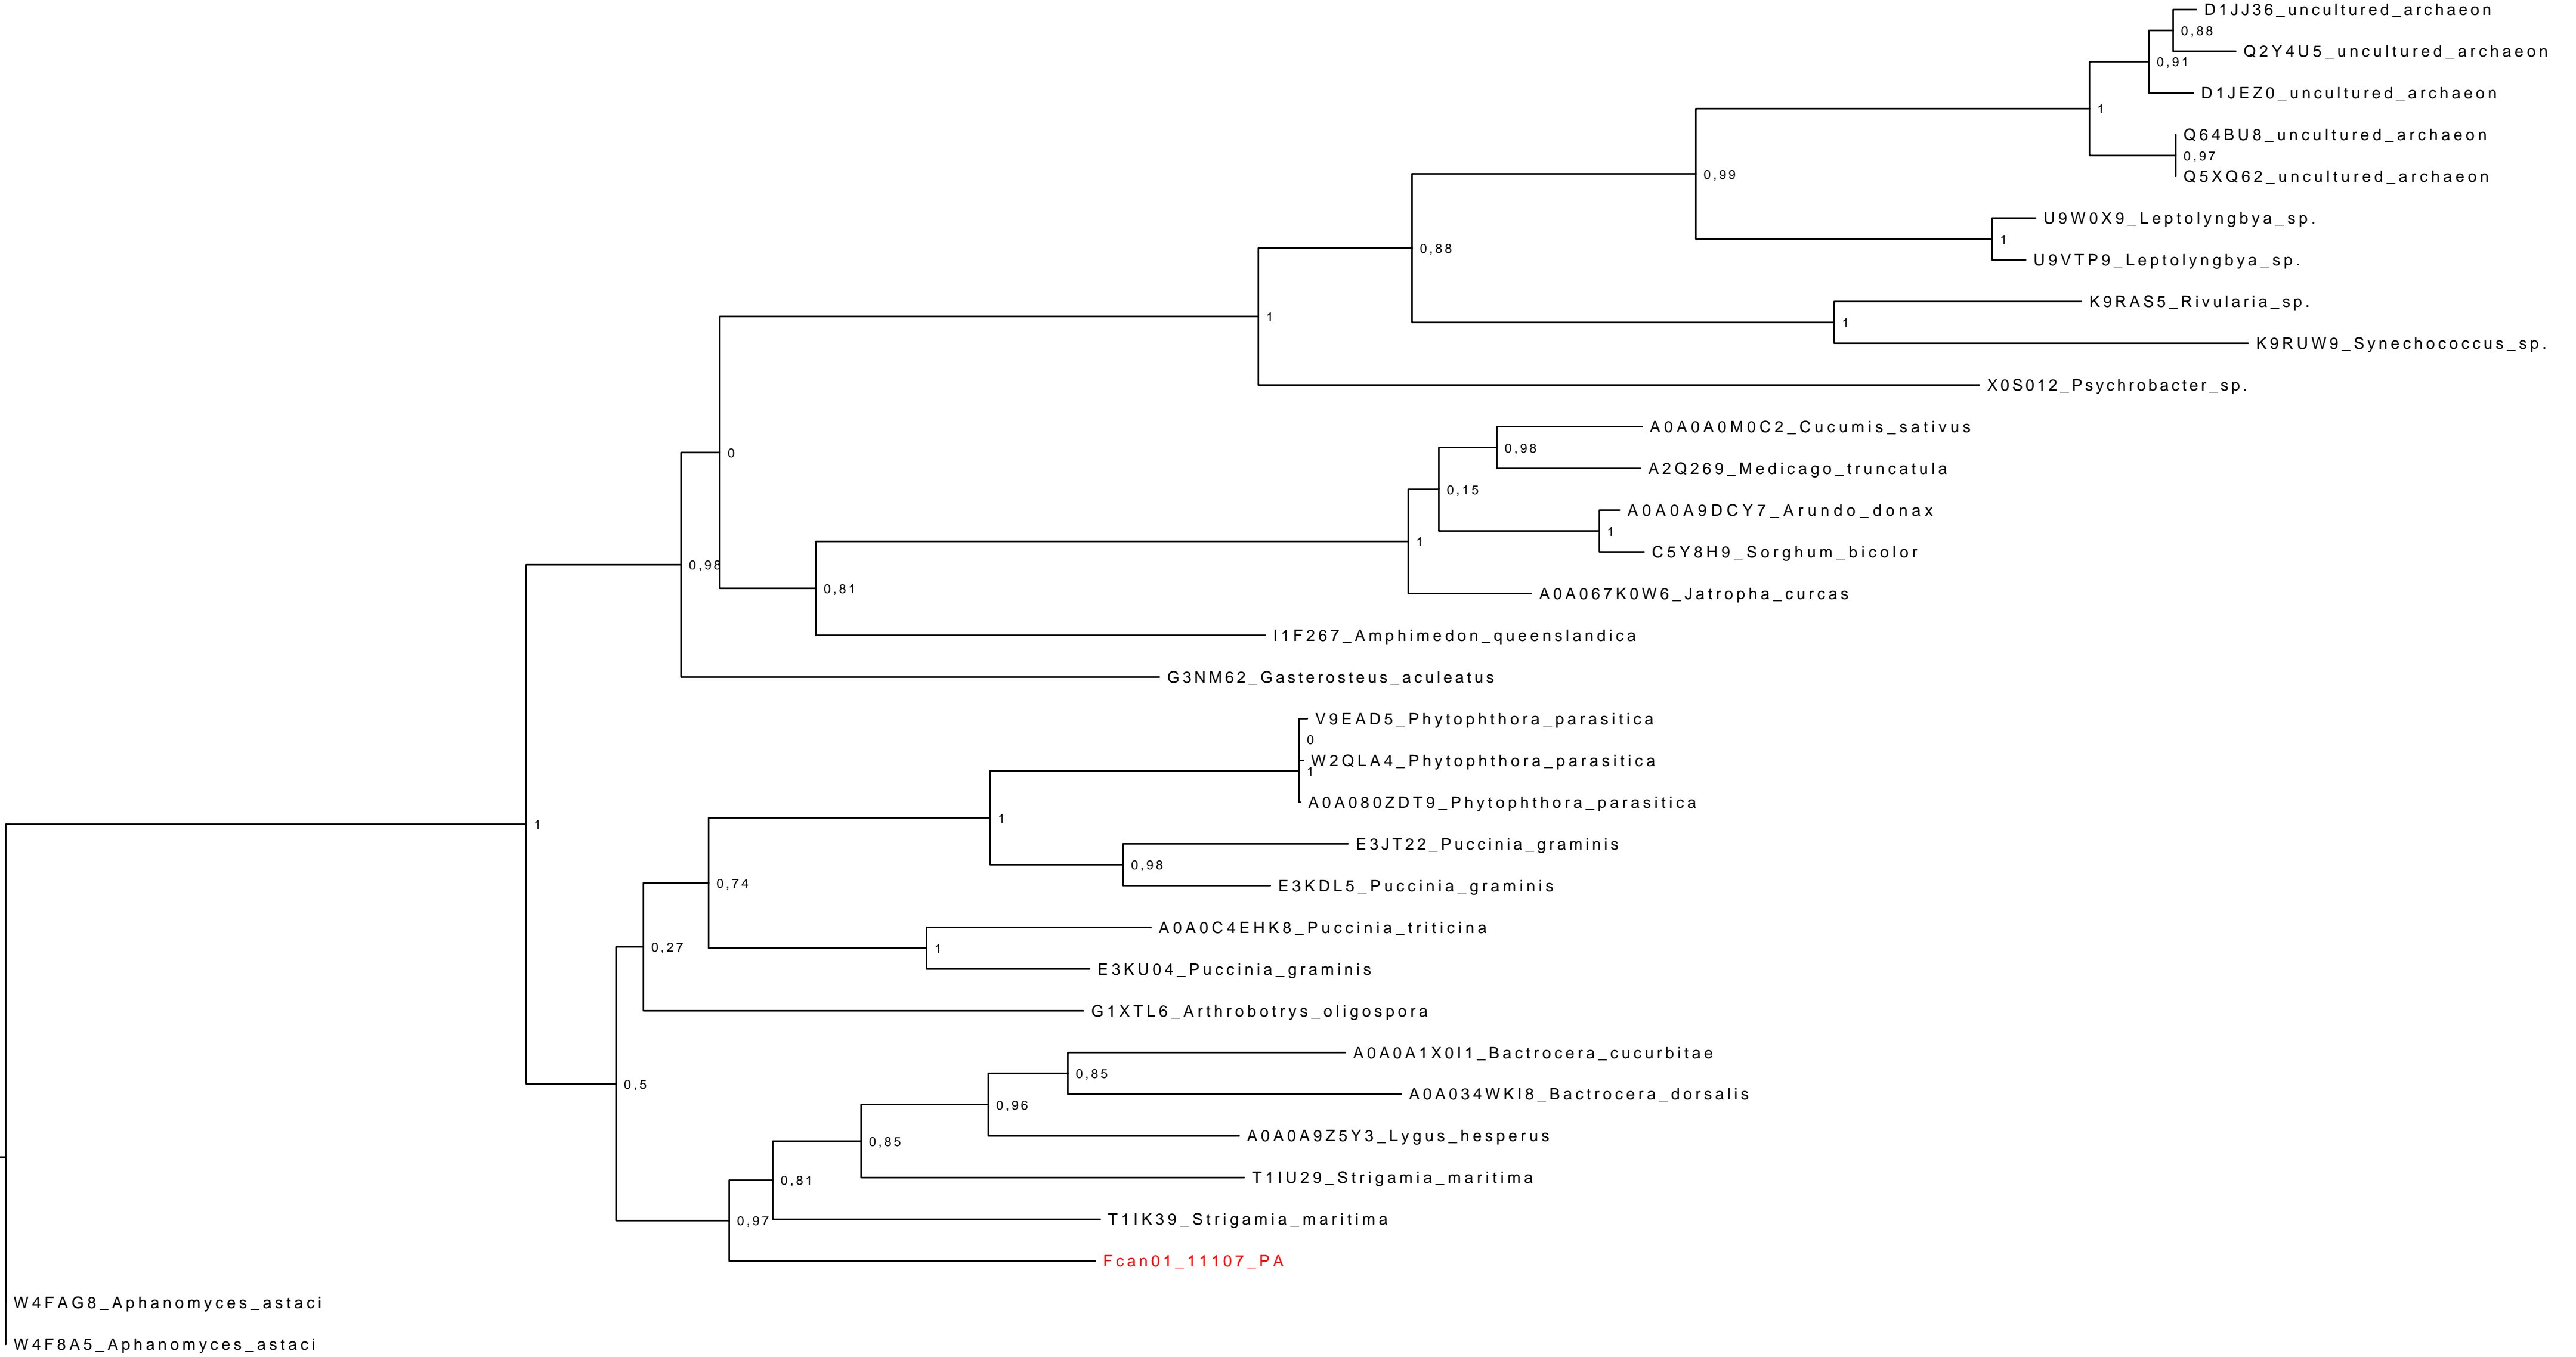

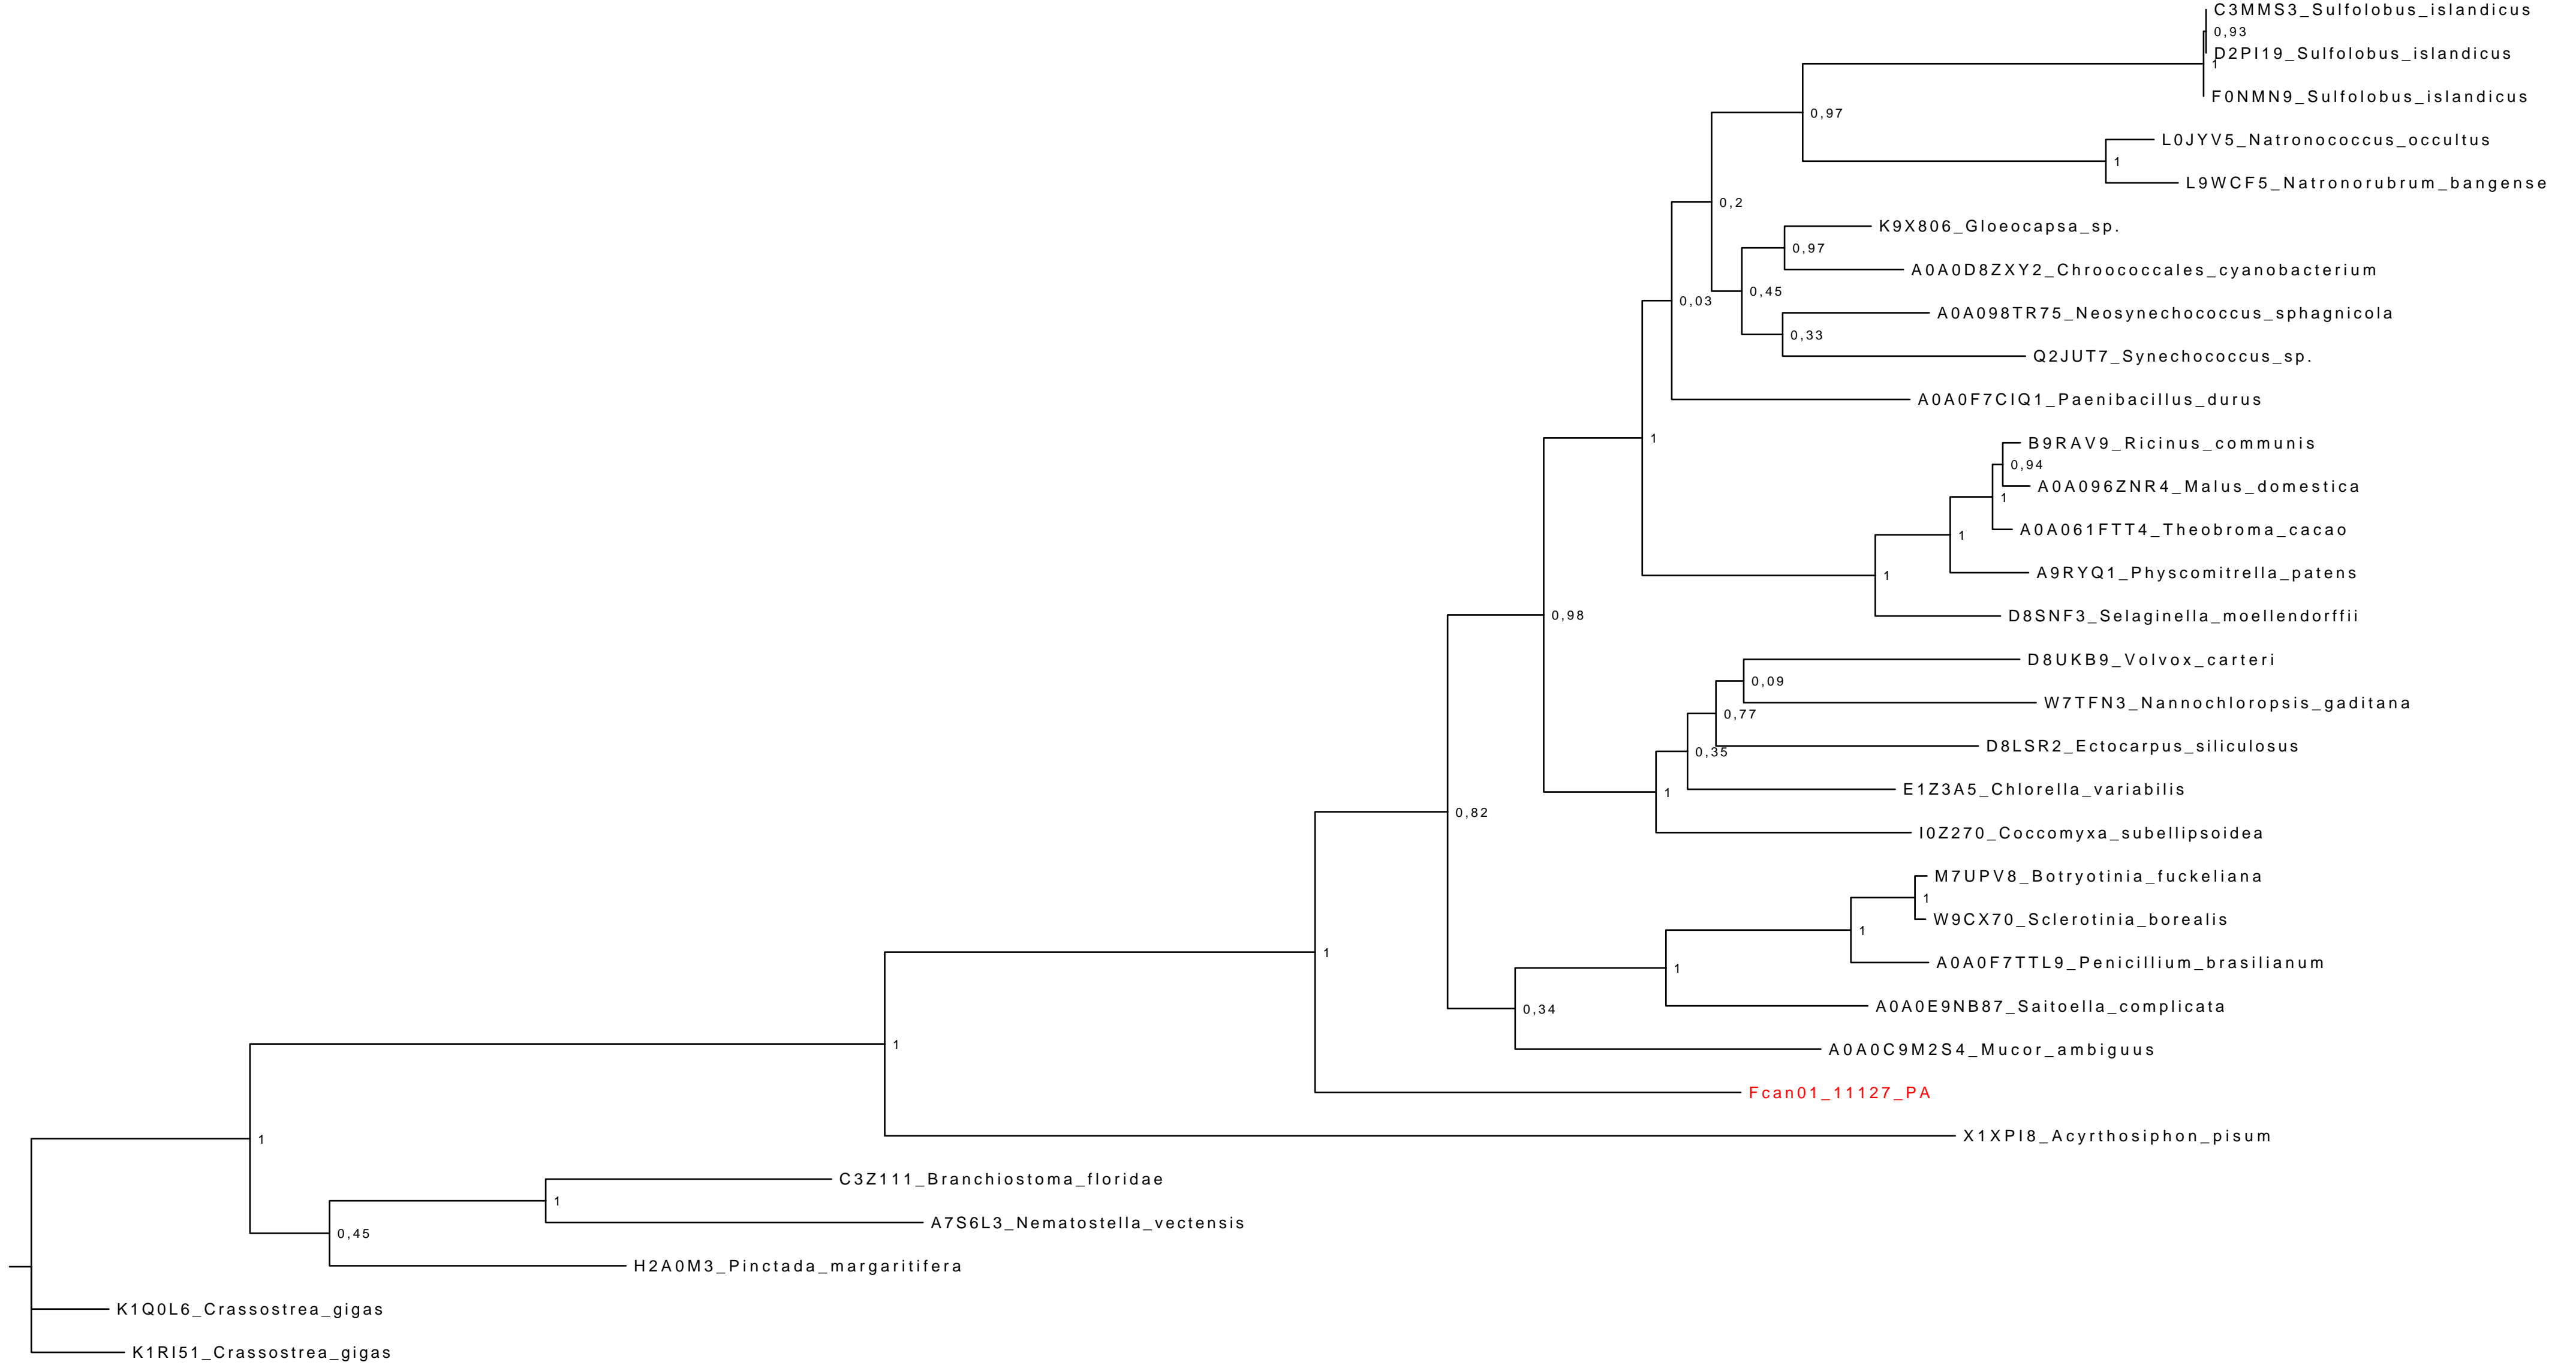

0.4

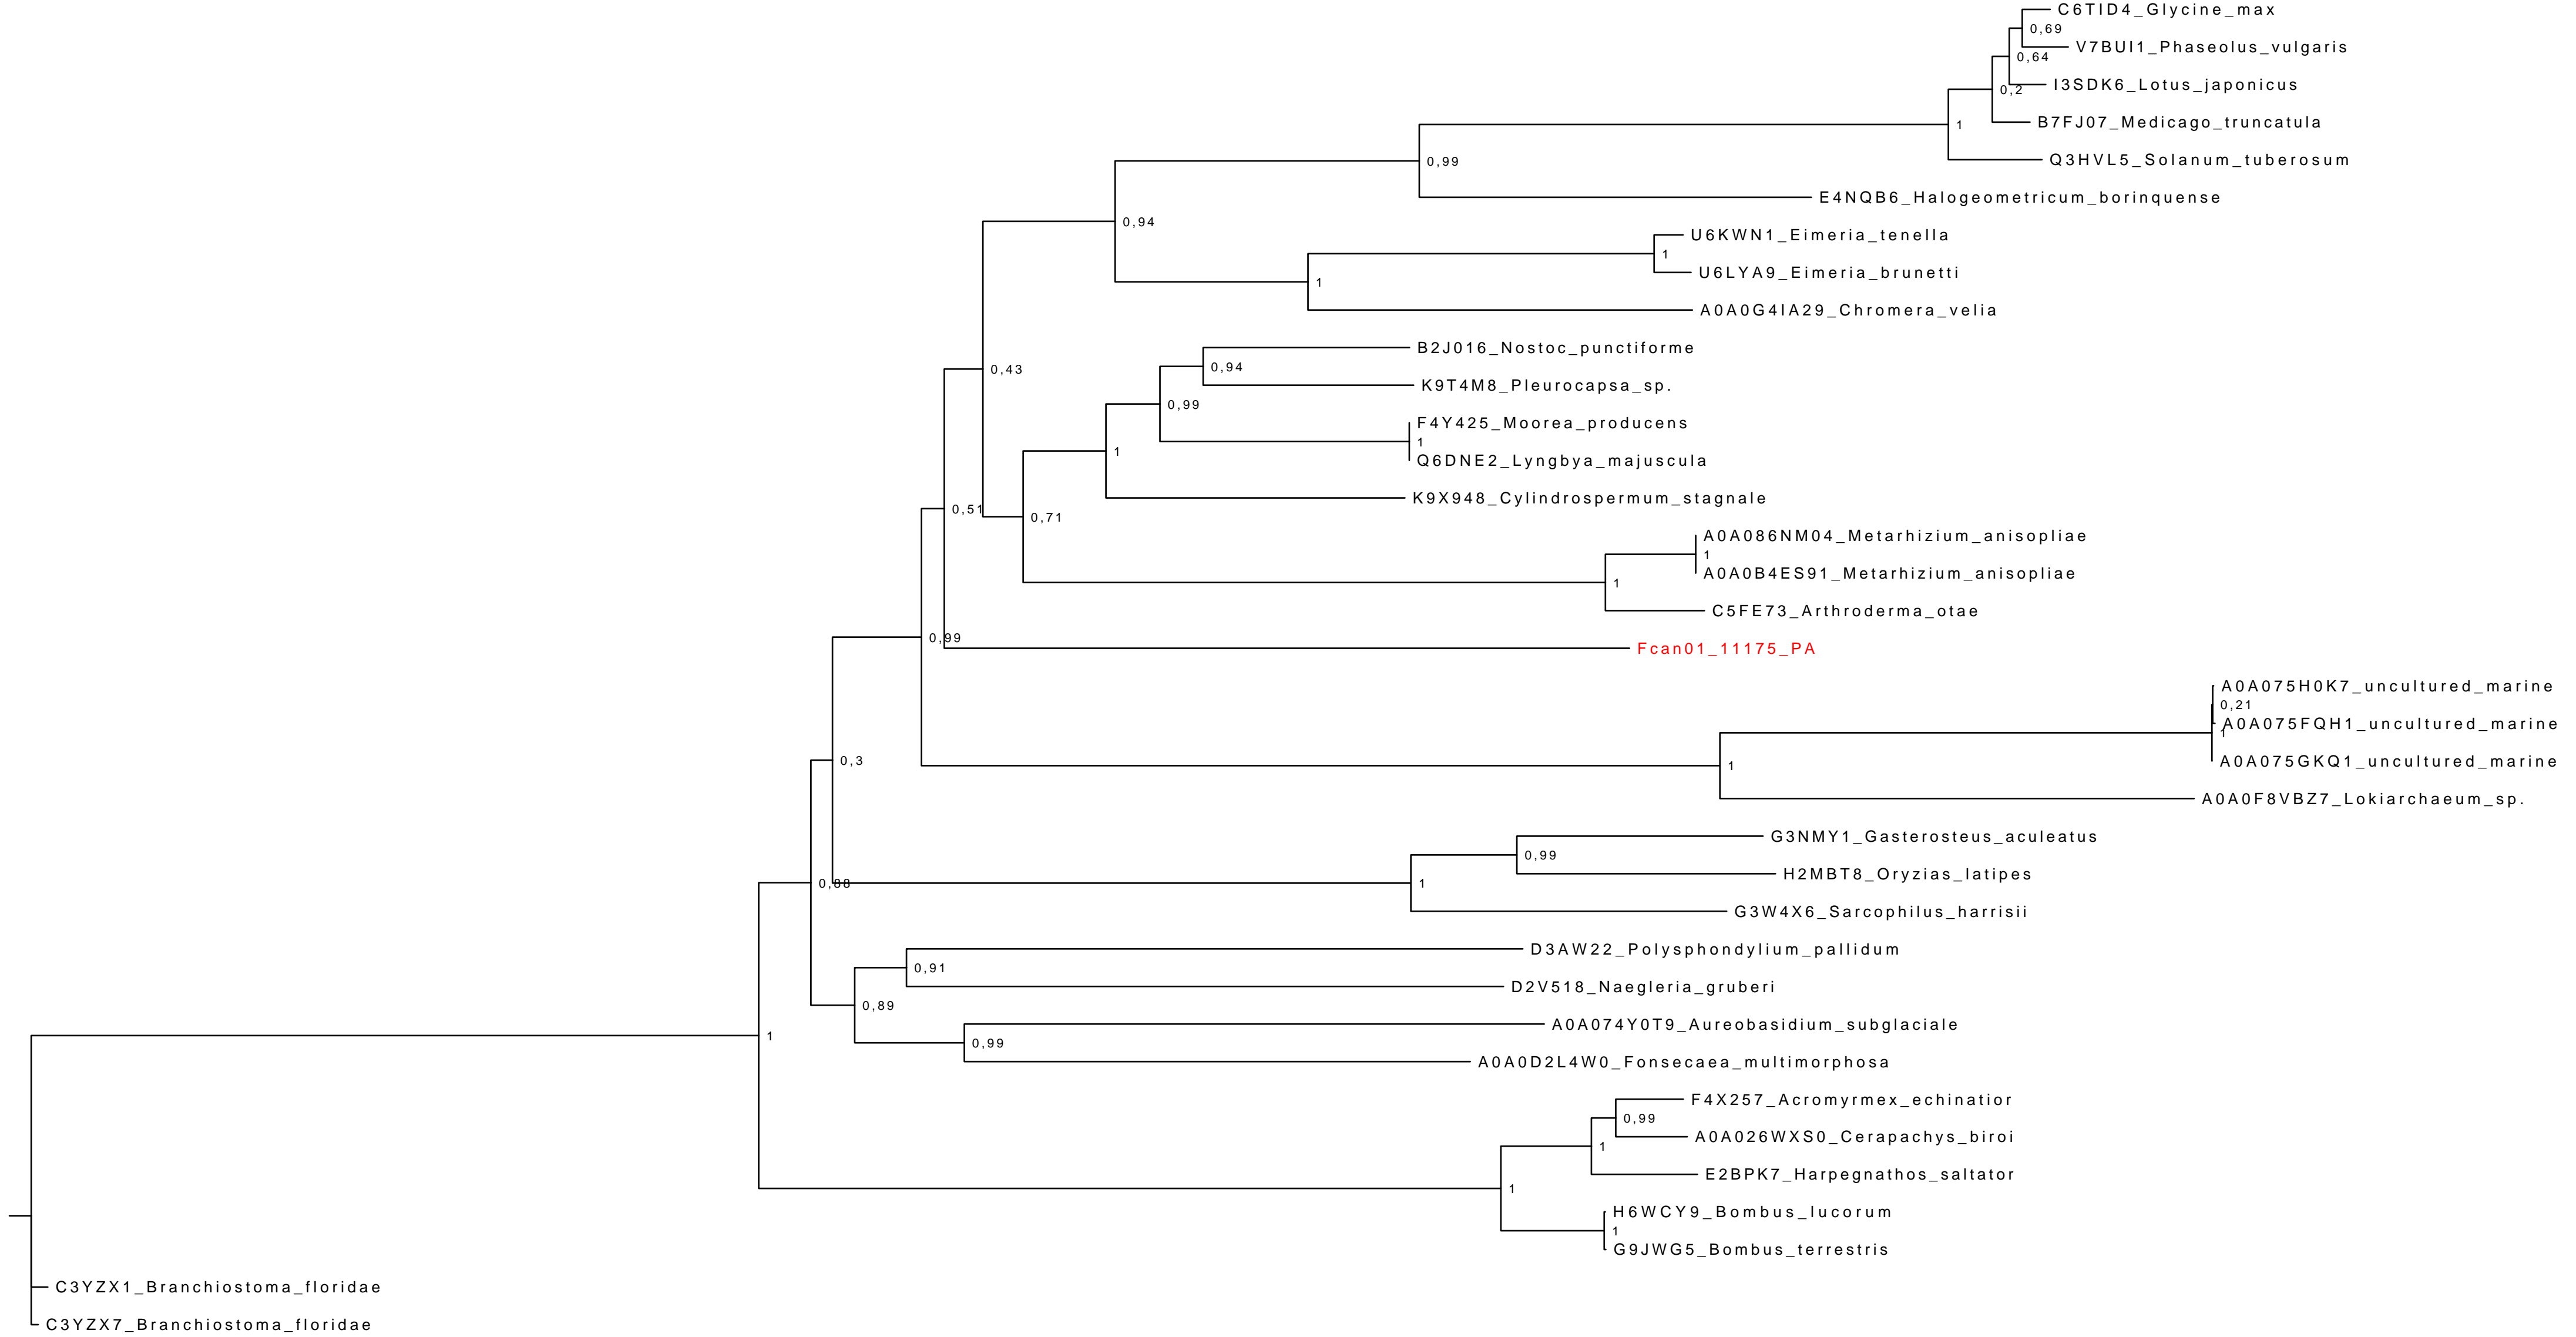

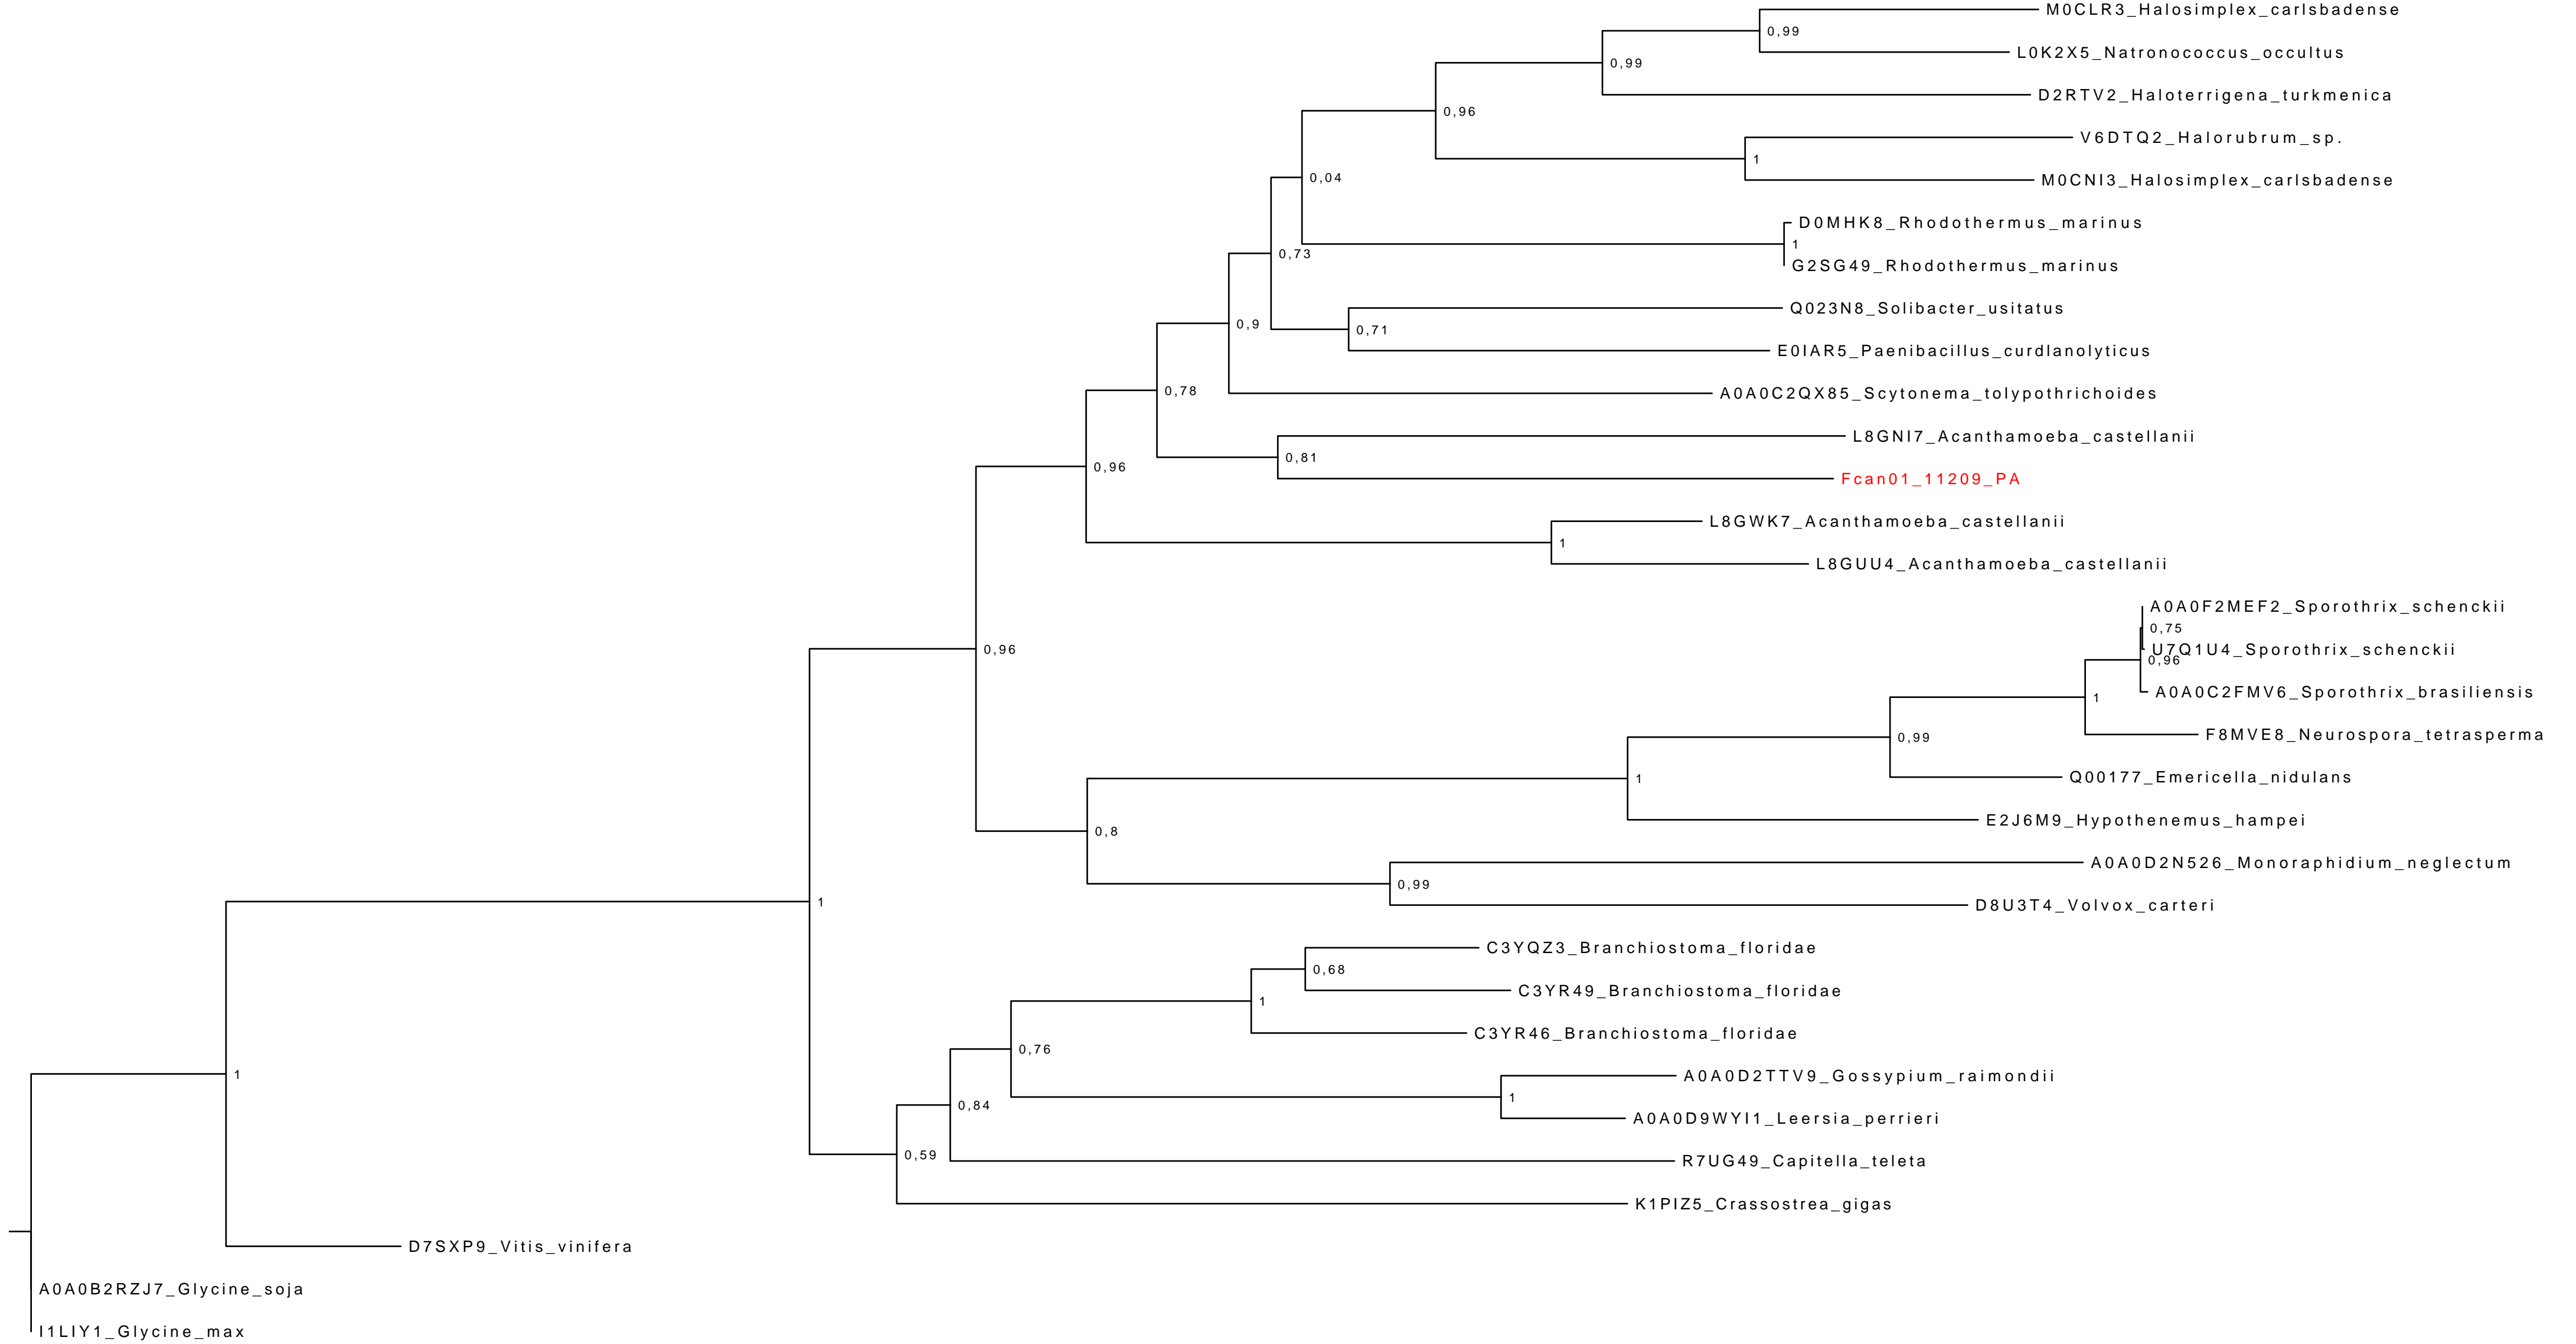

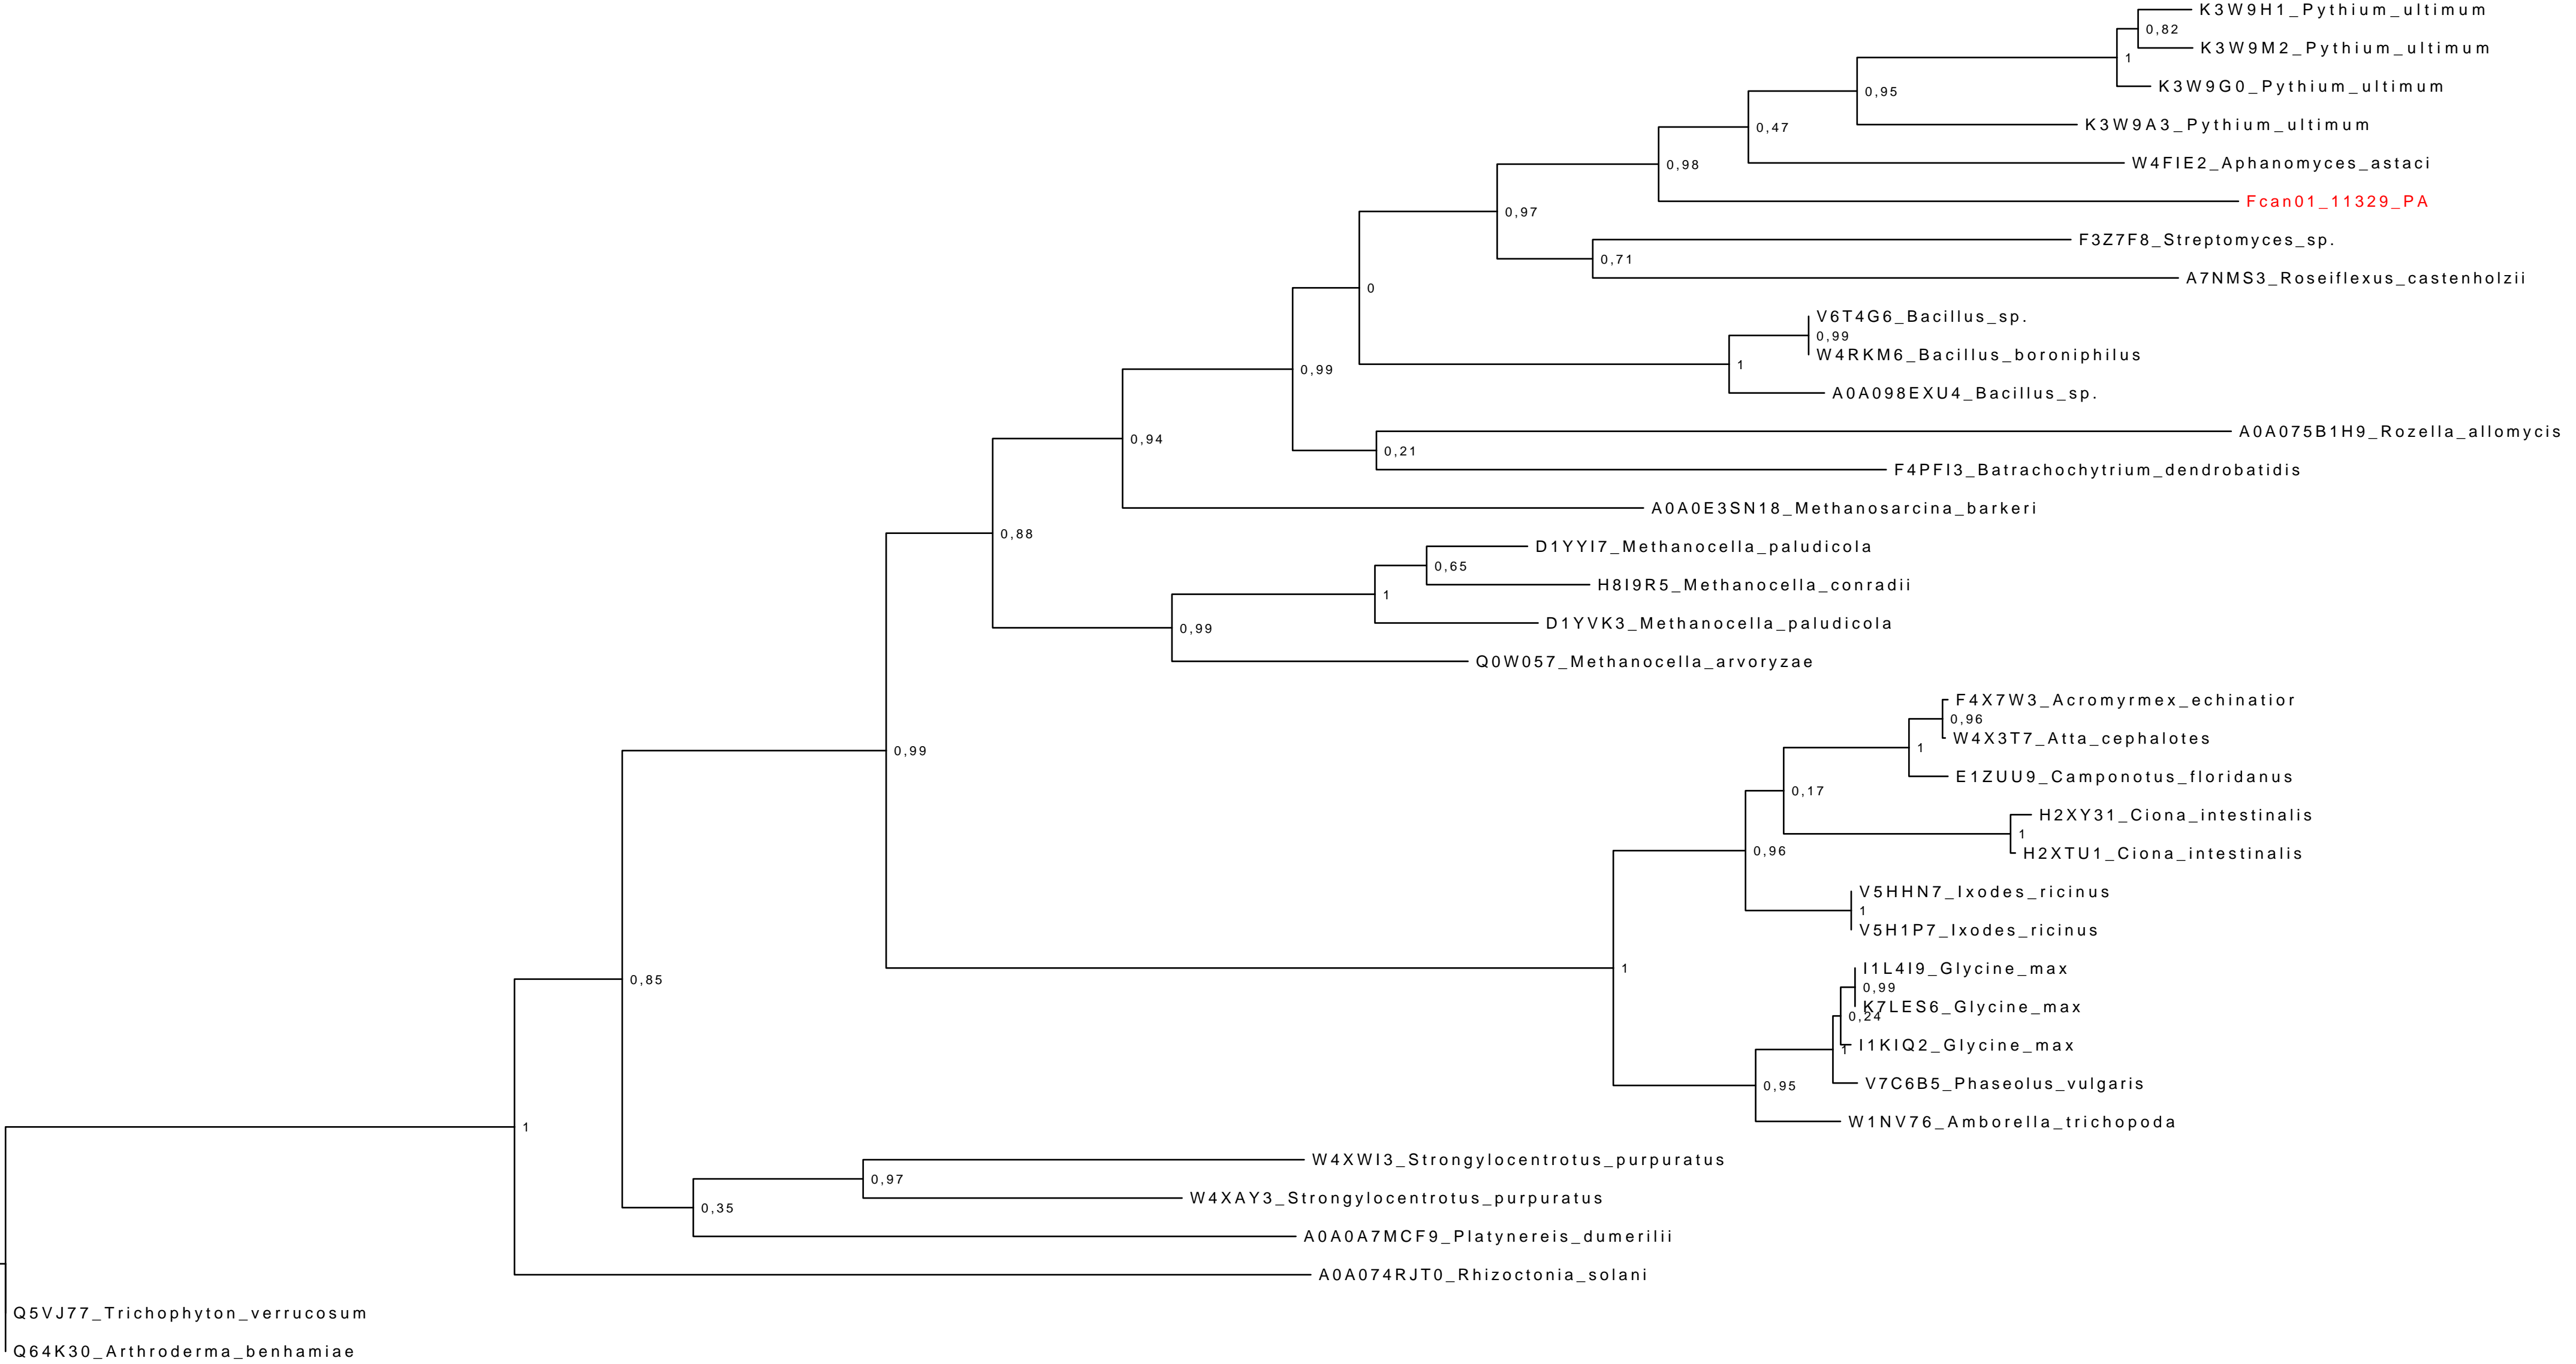

0.4

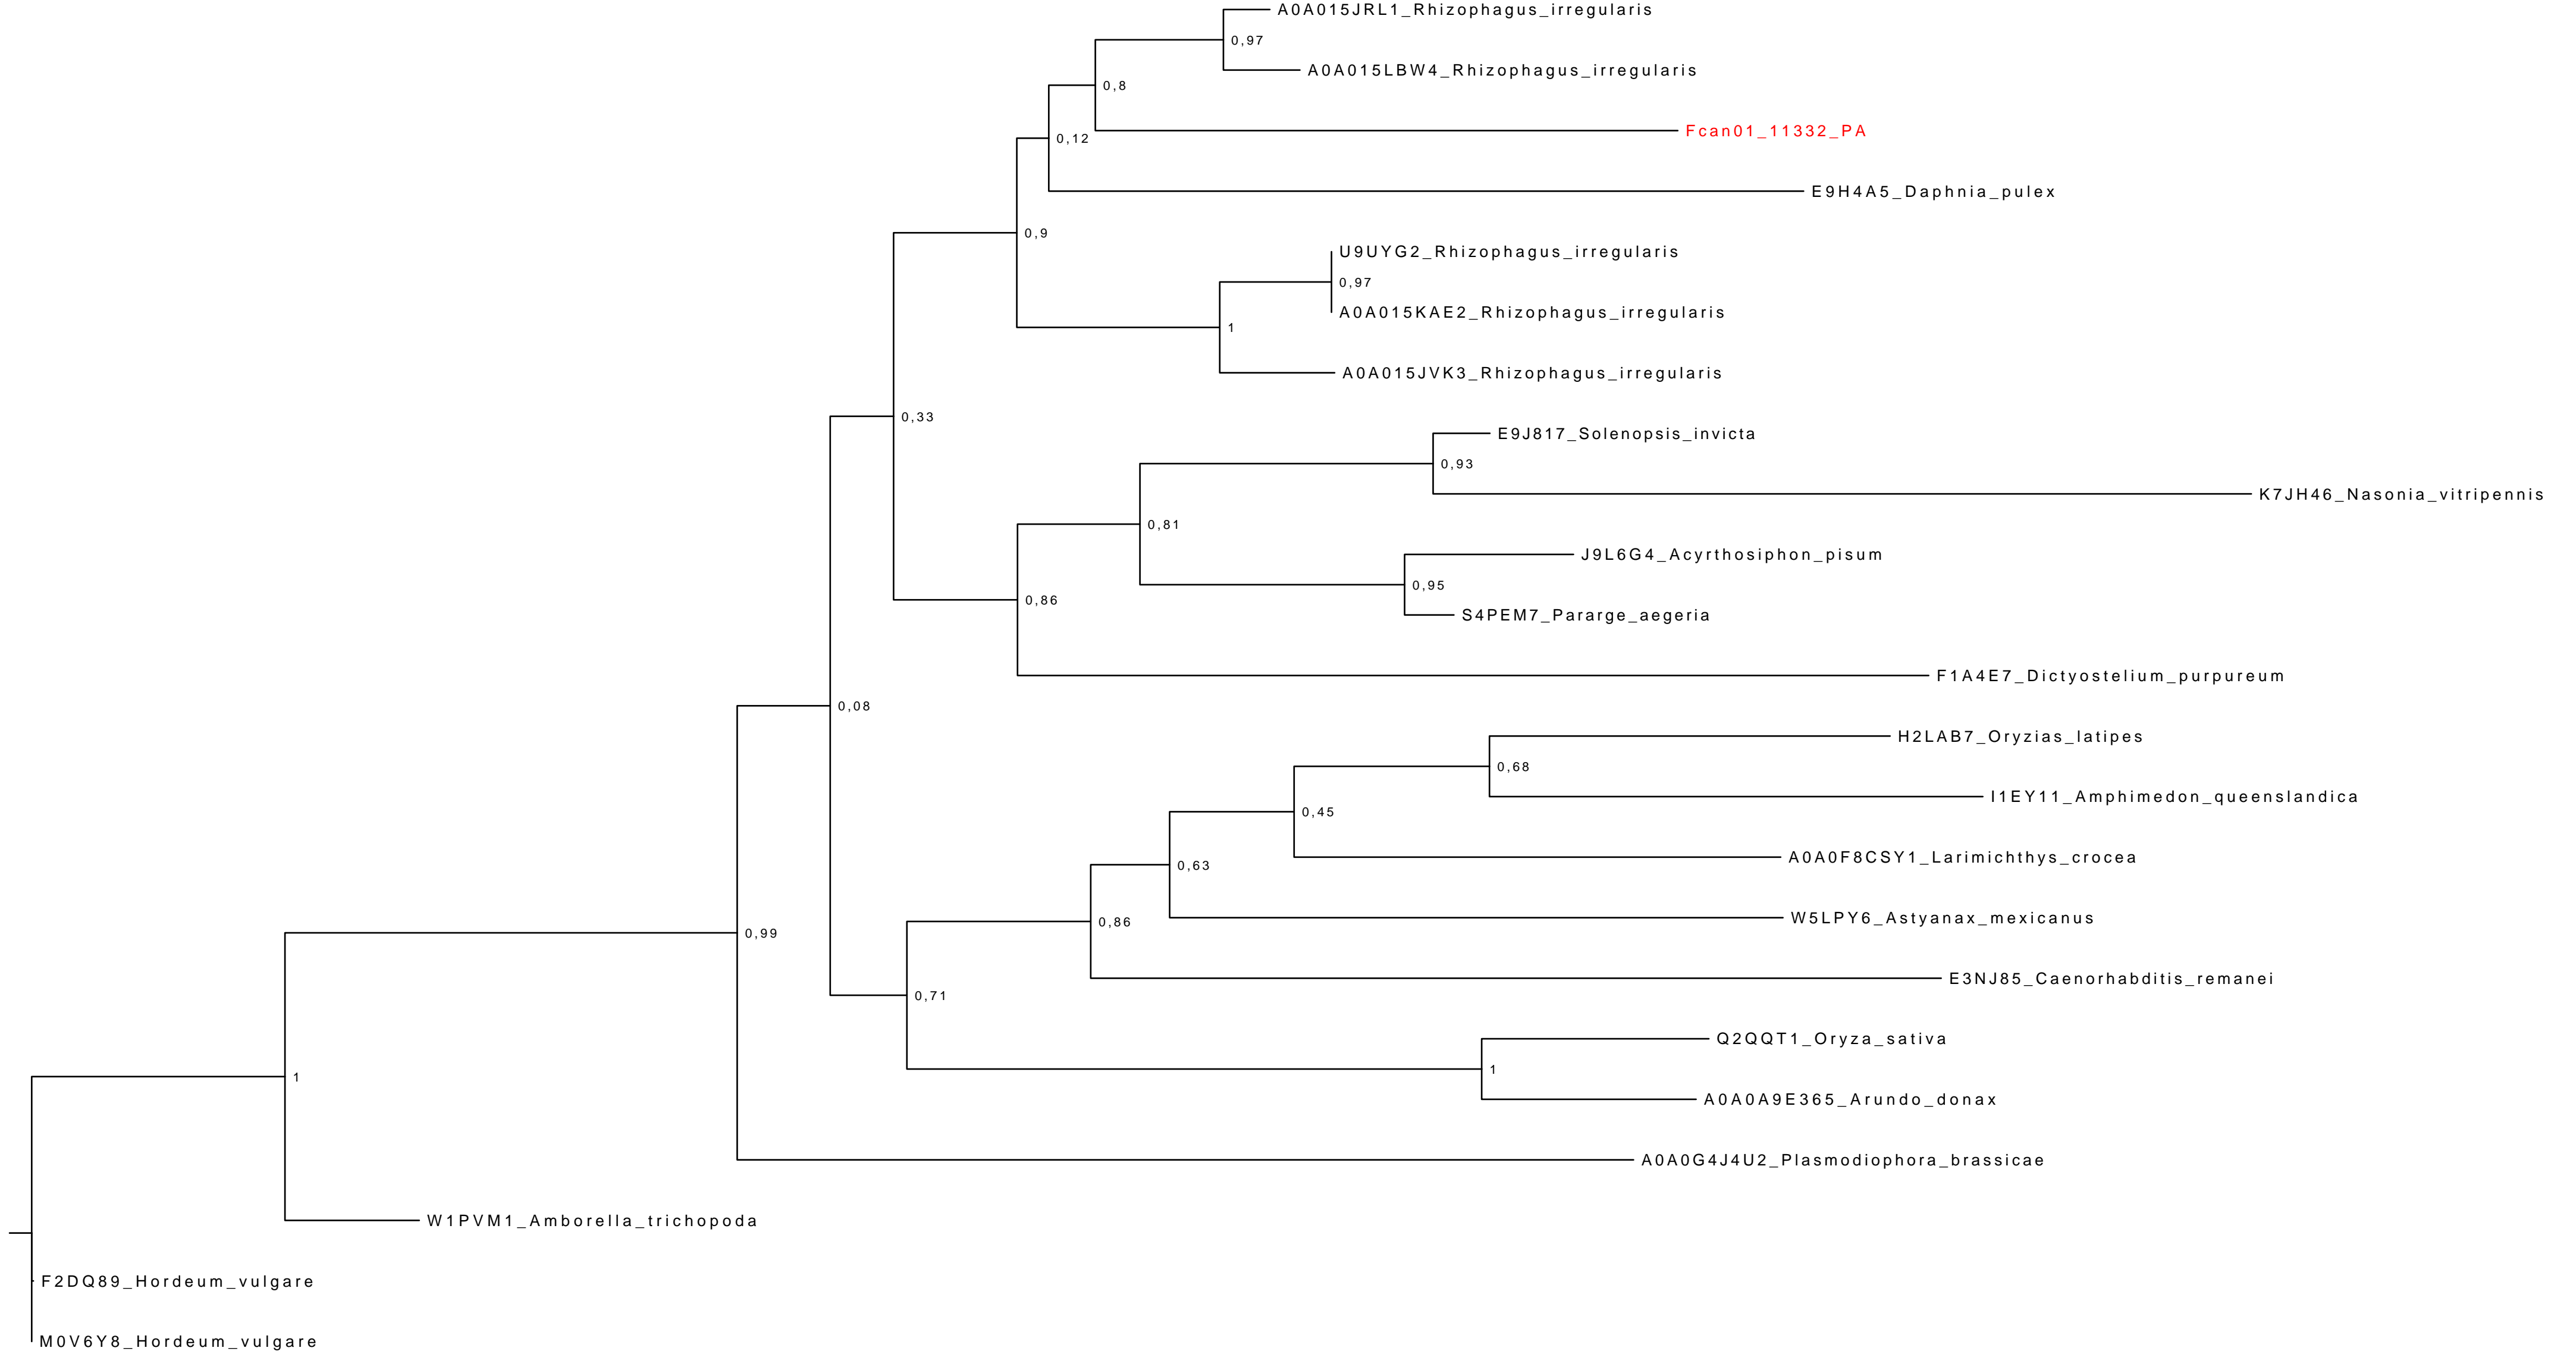



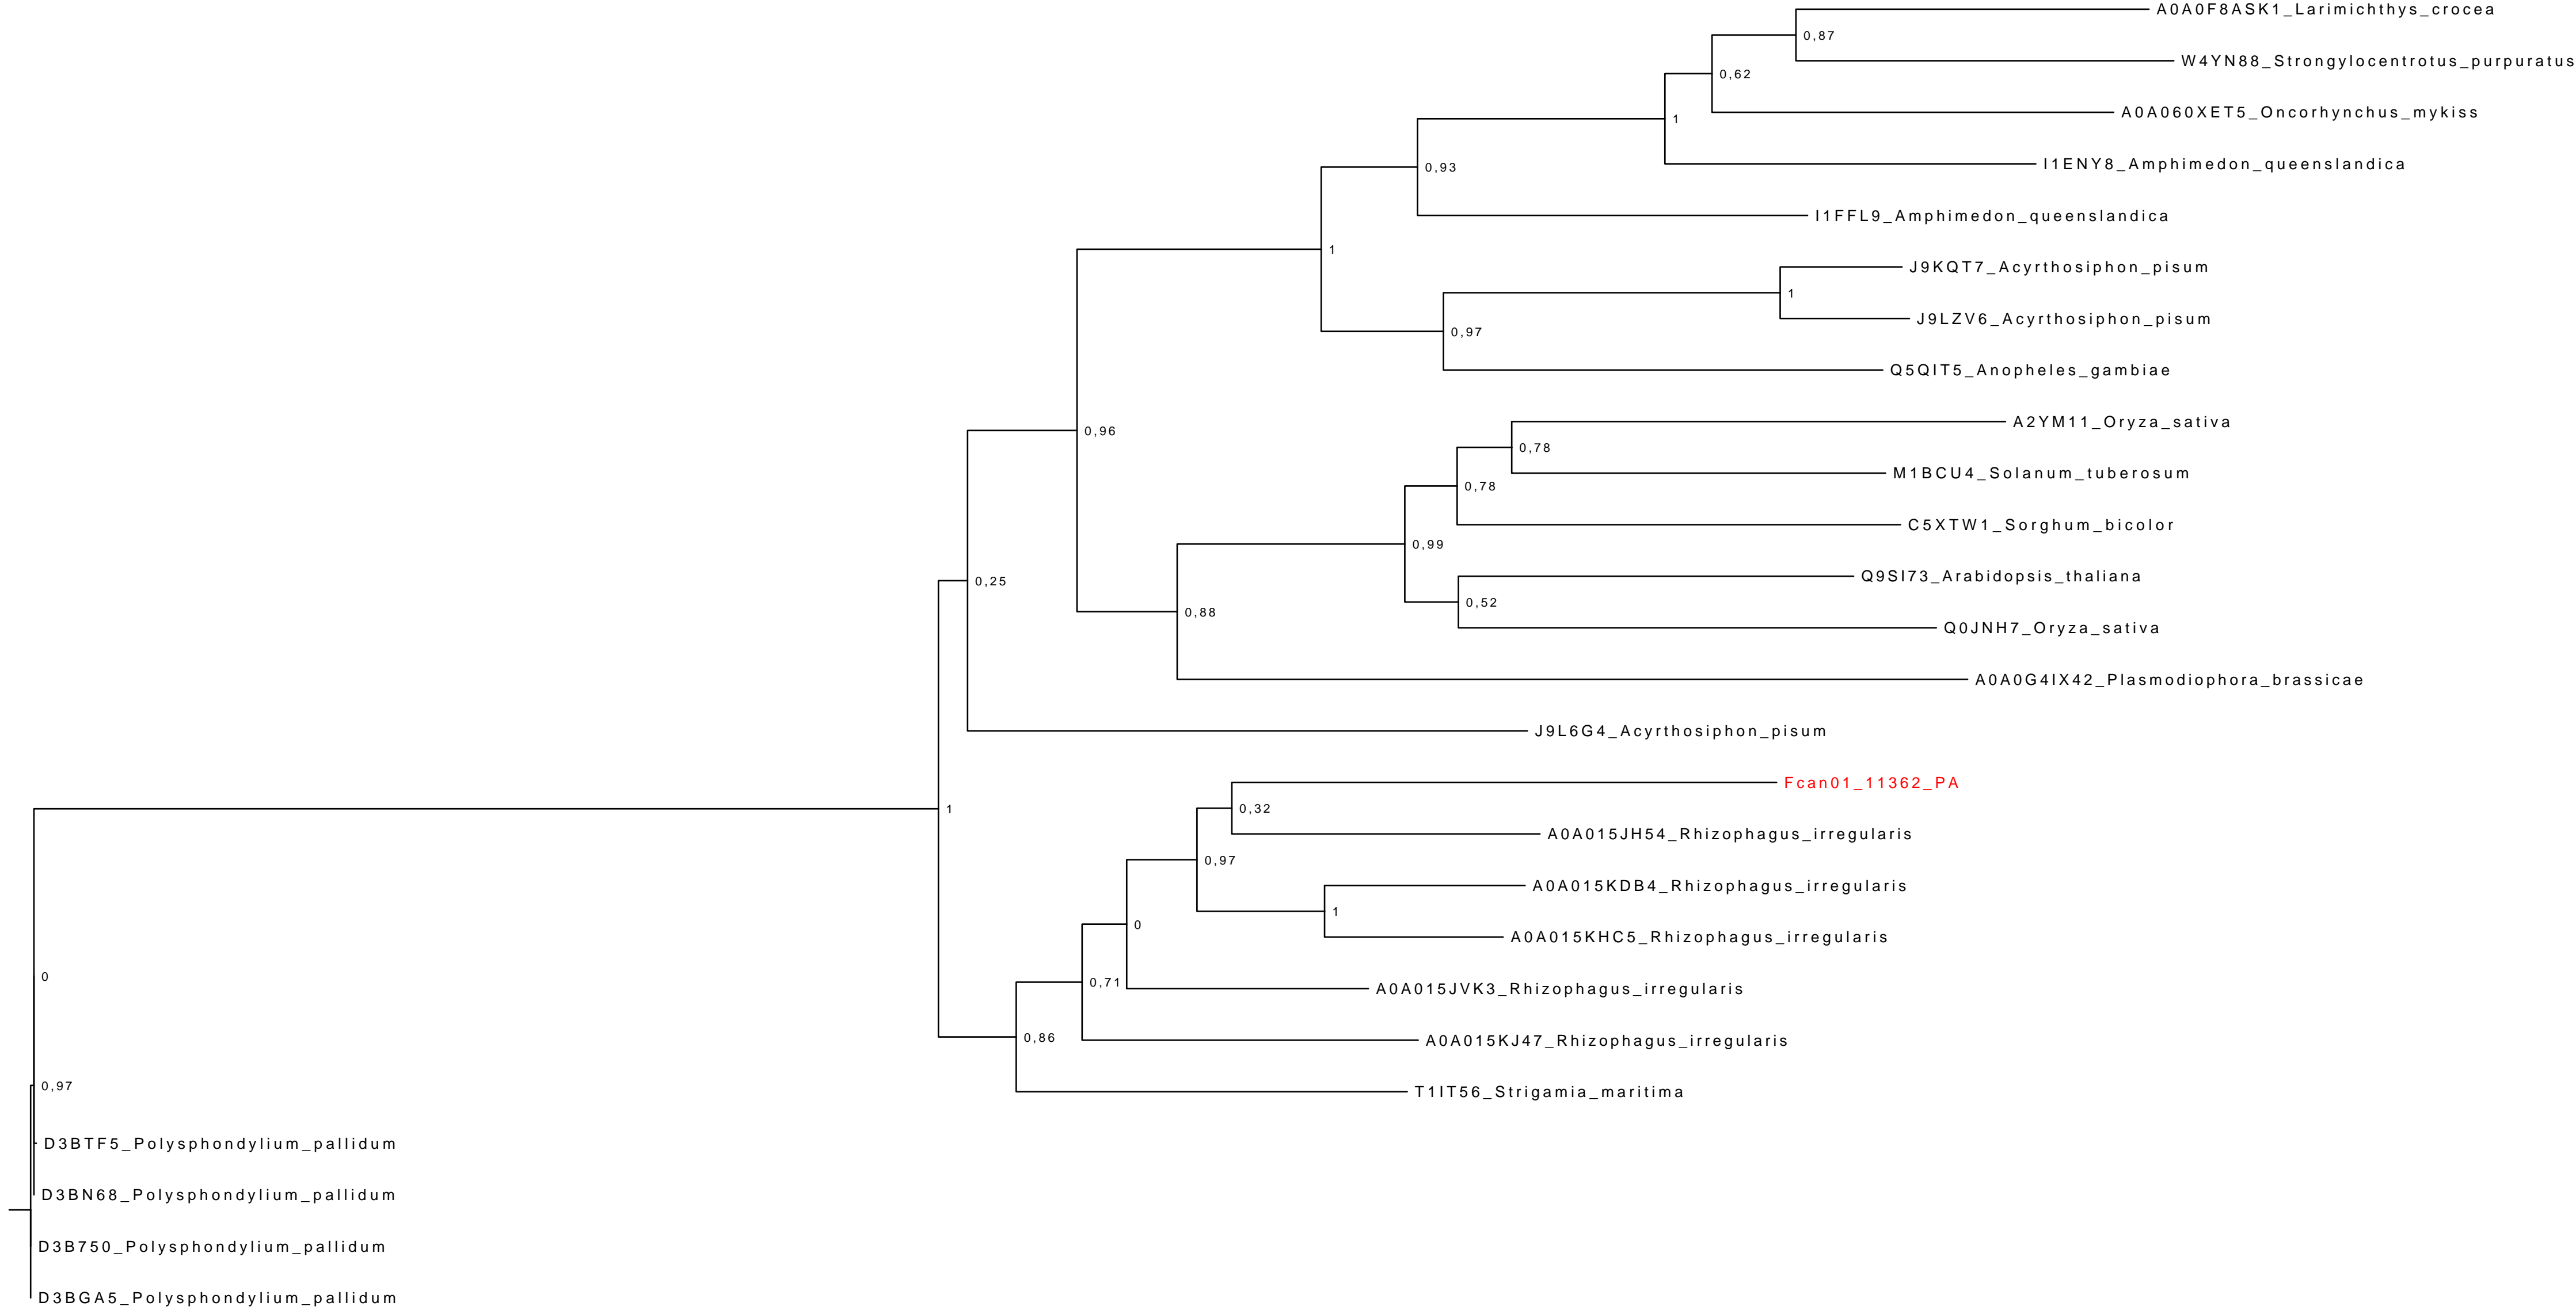

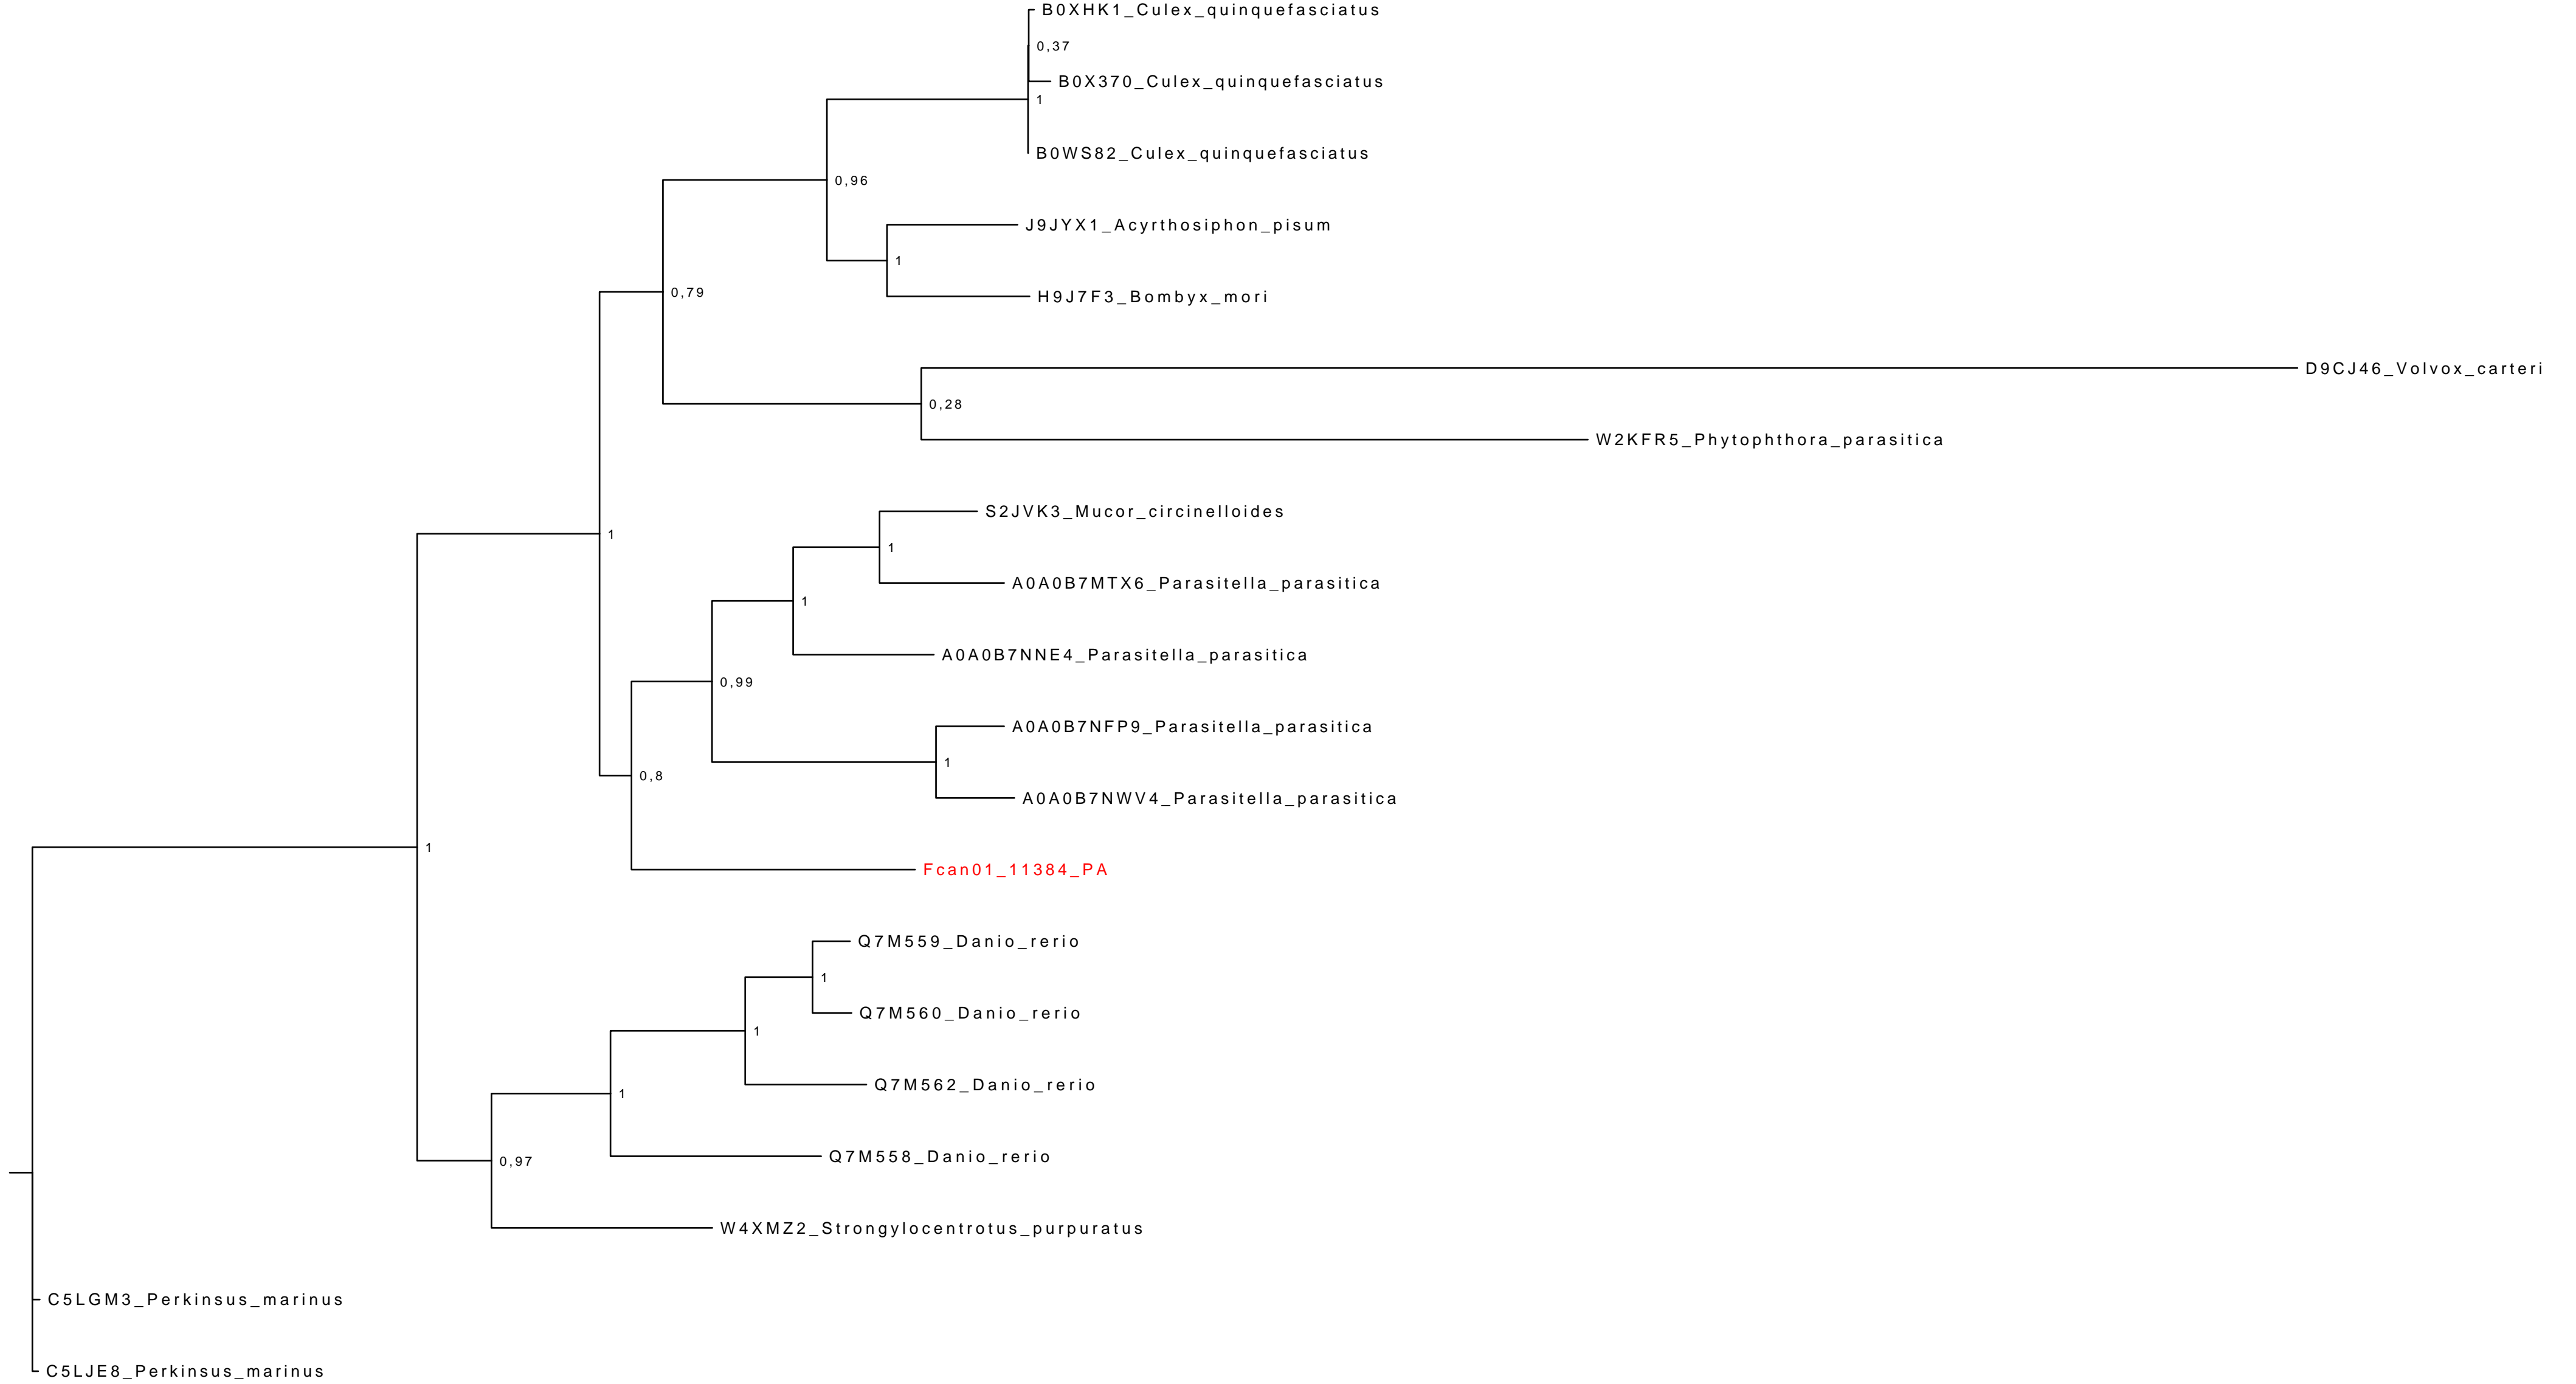

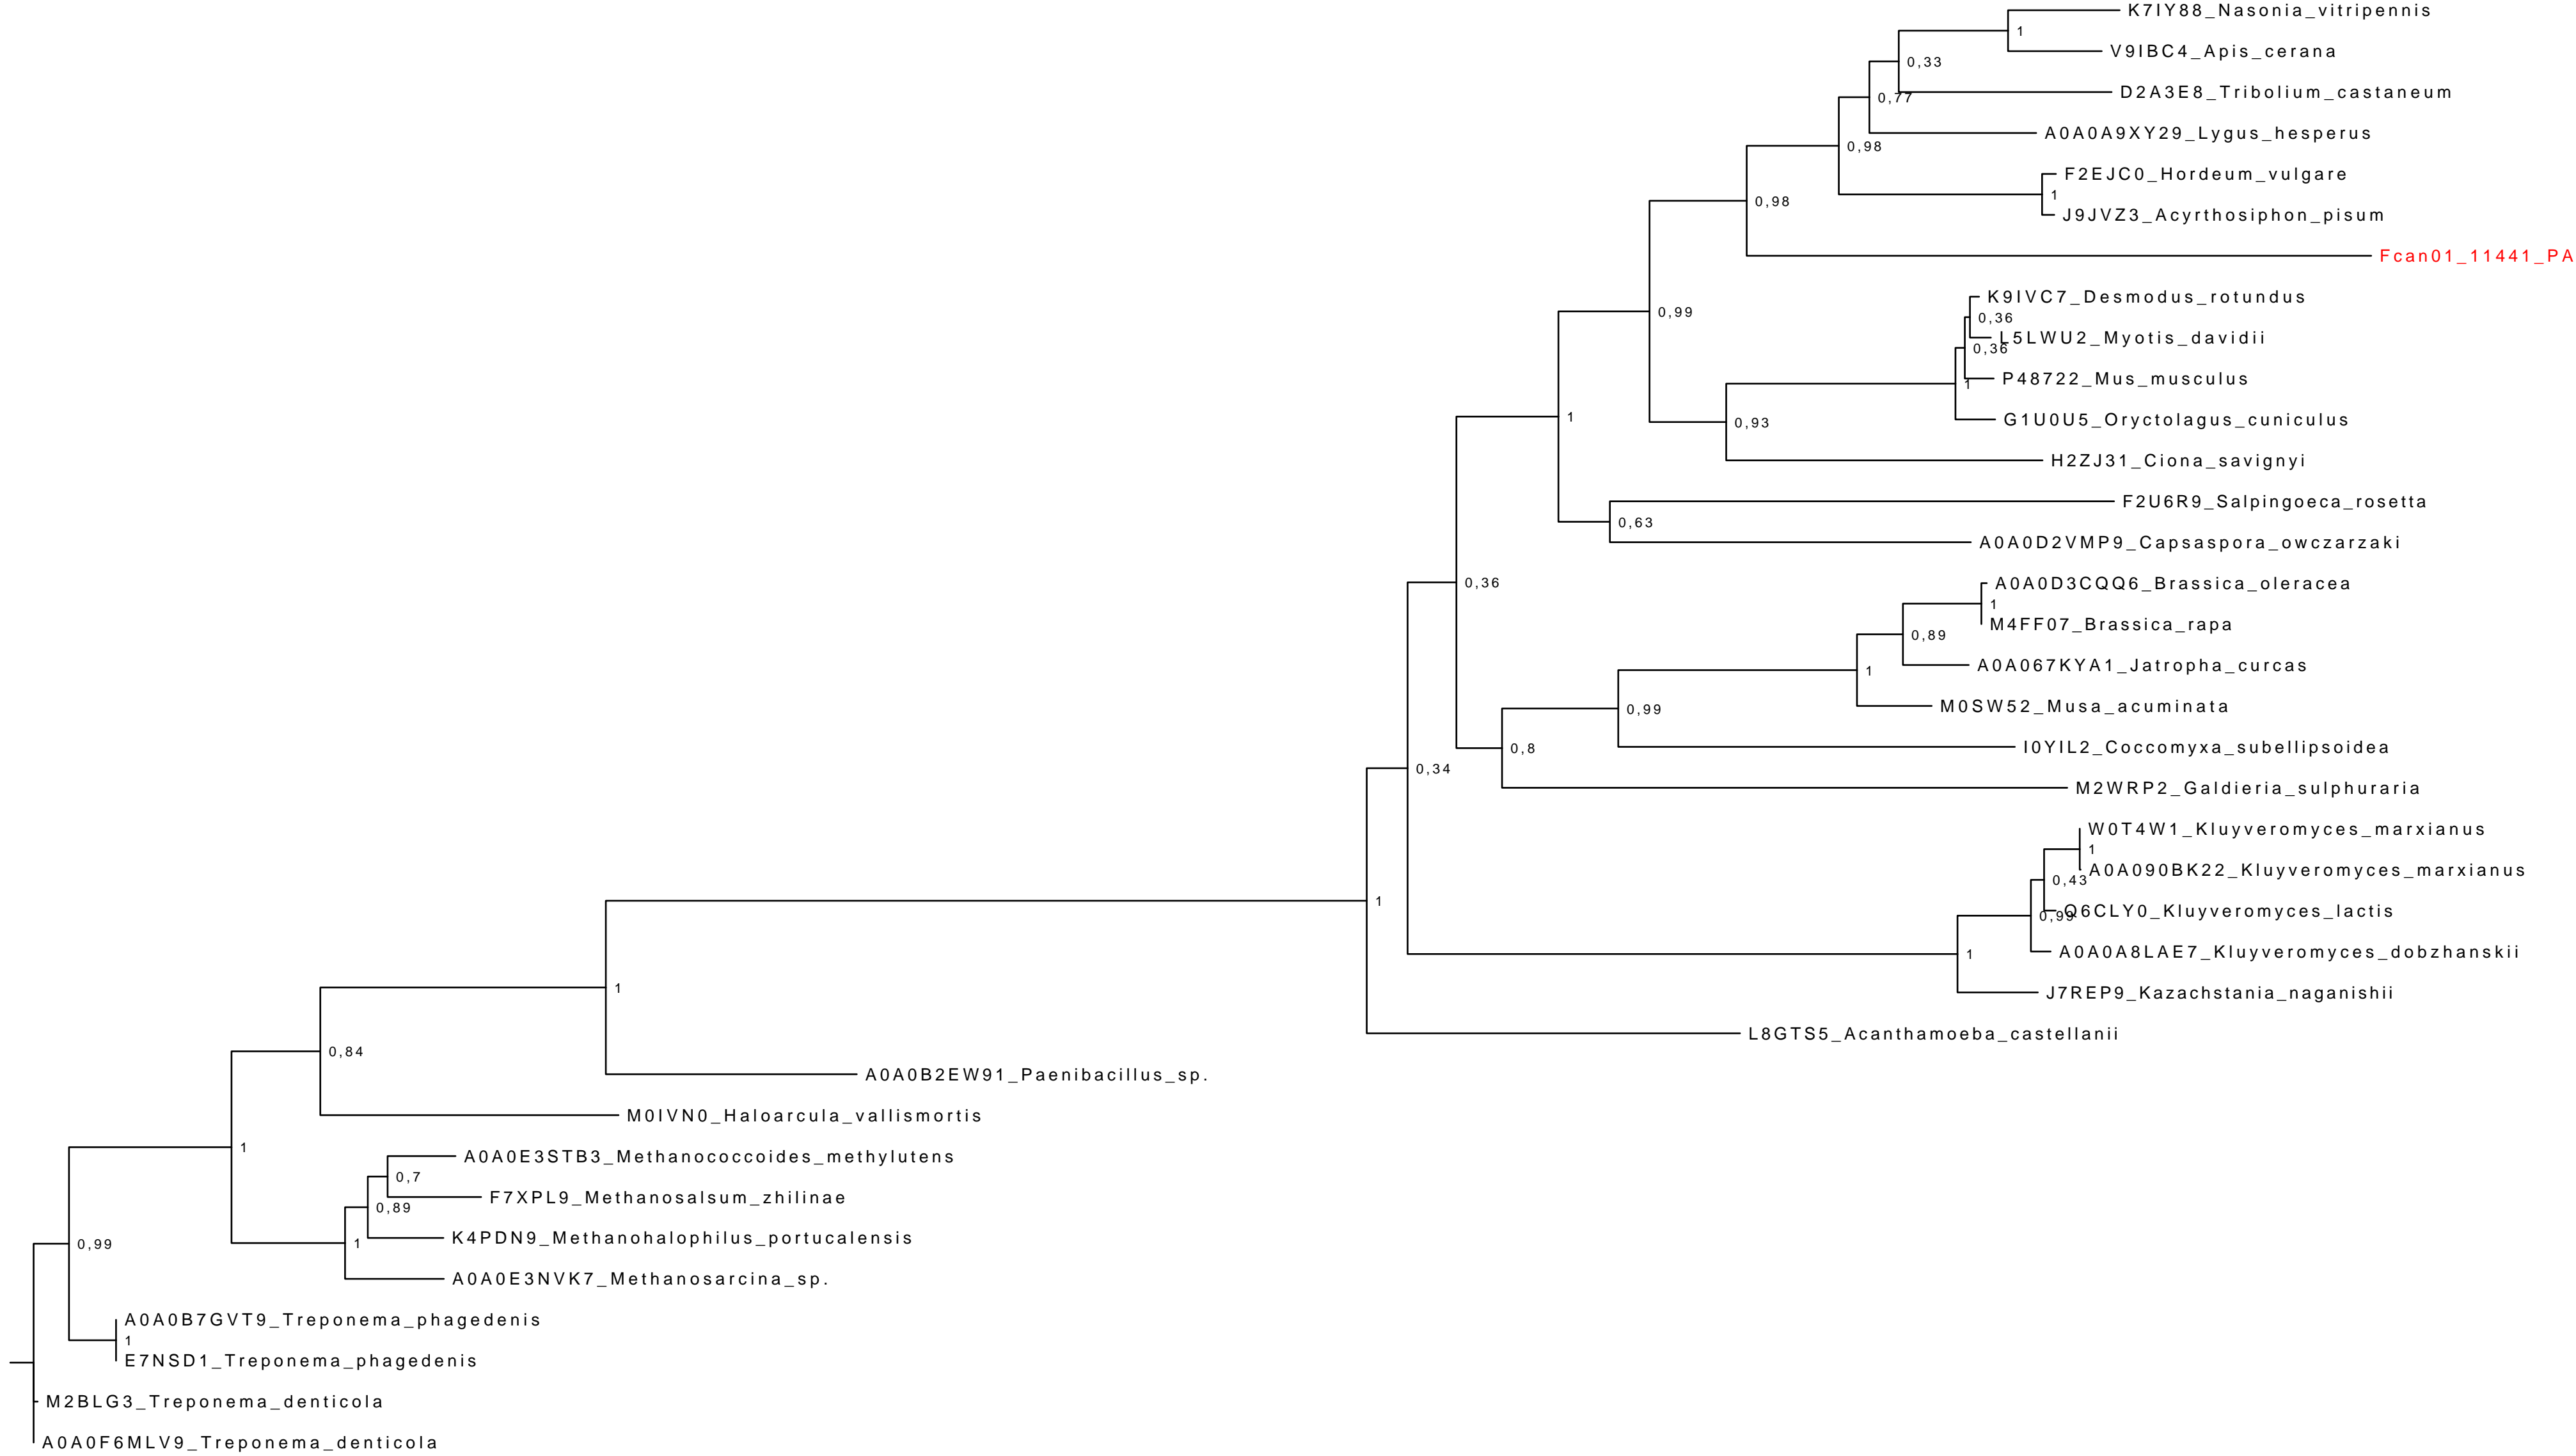

0.4

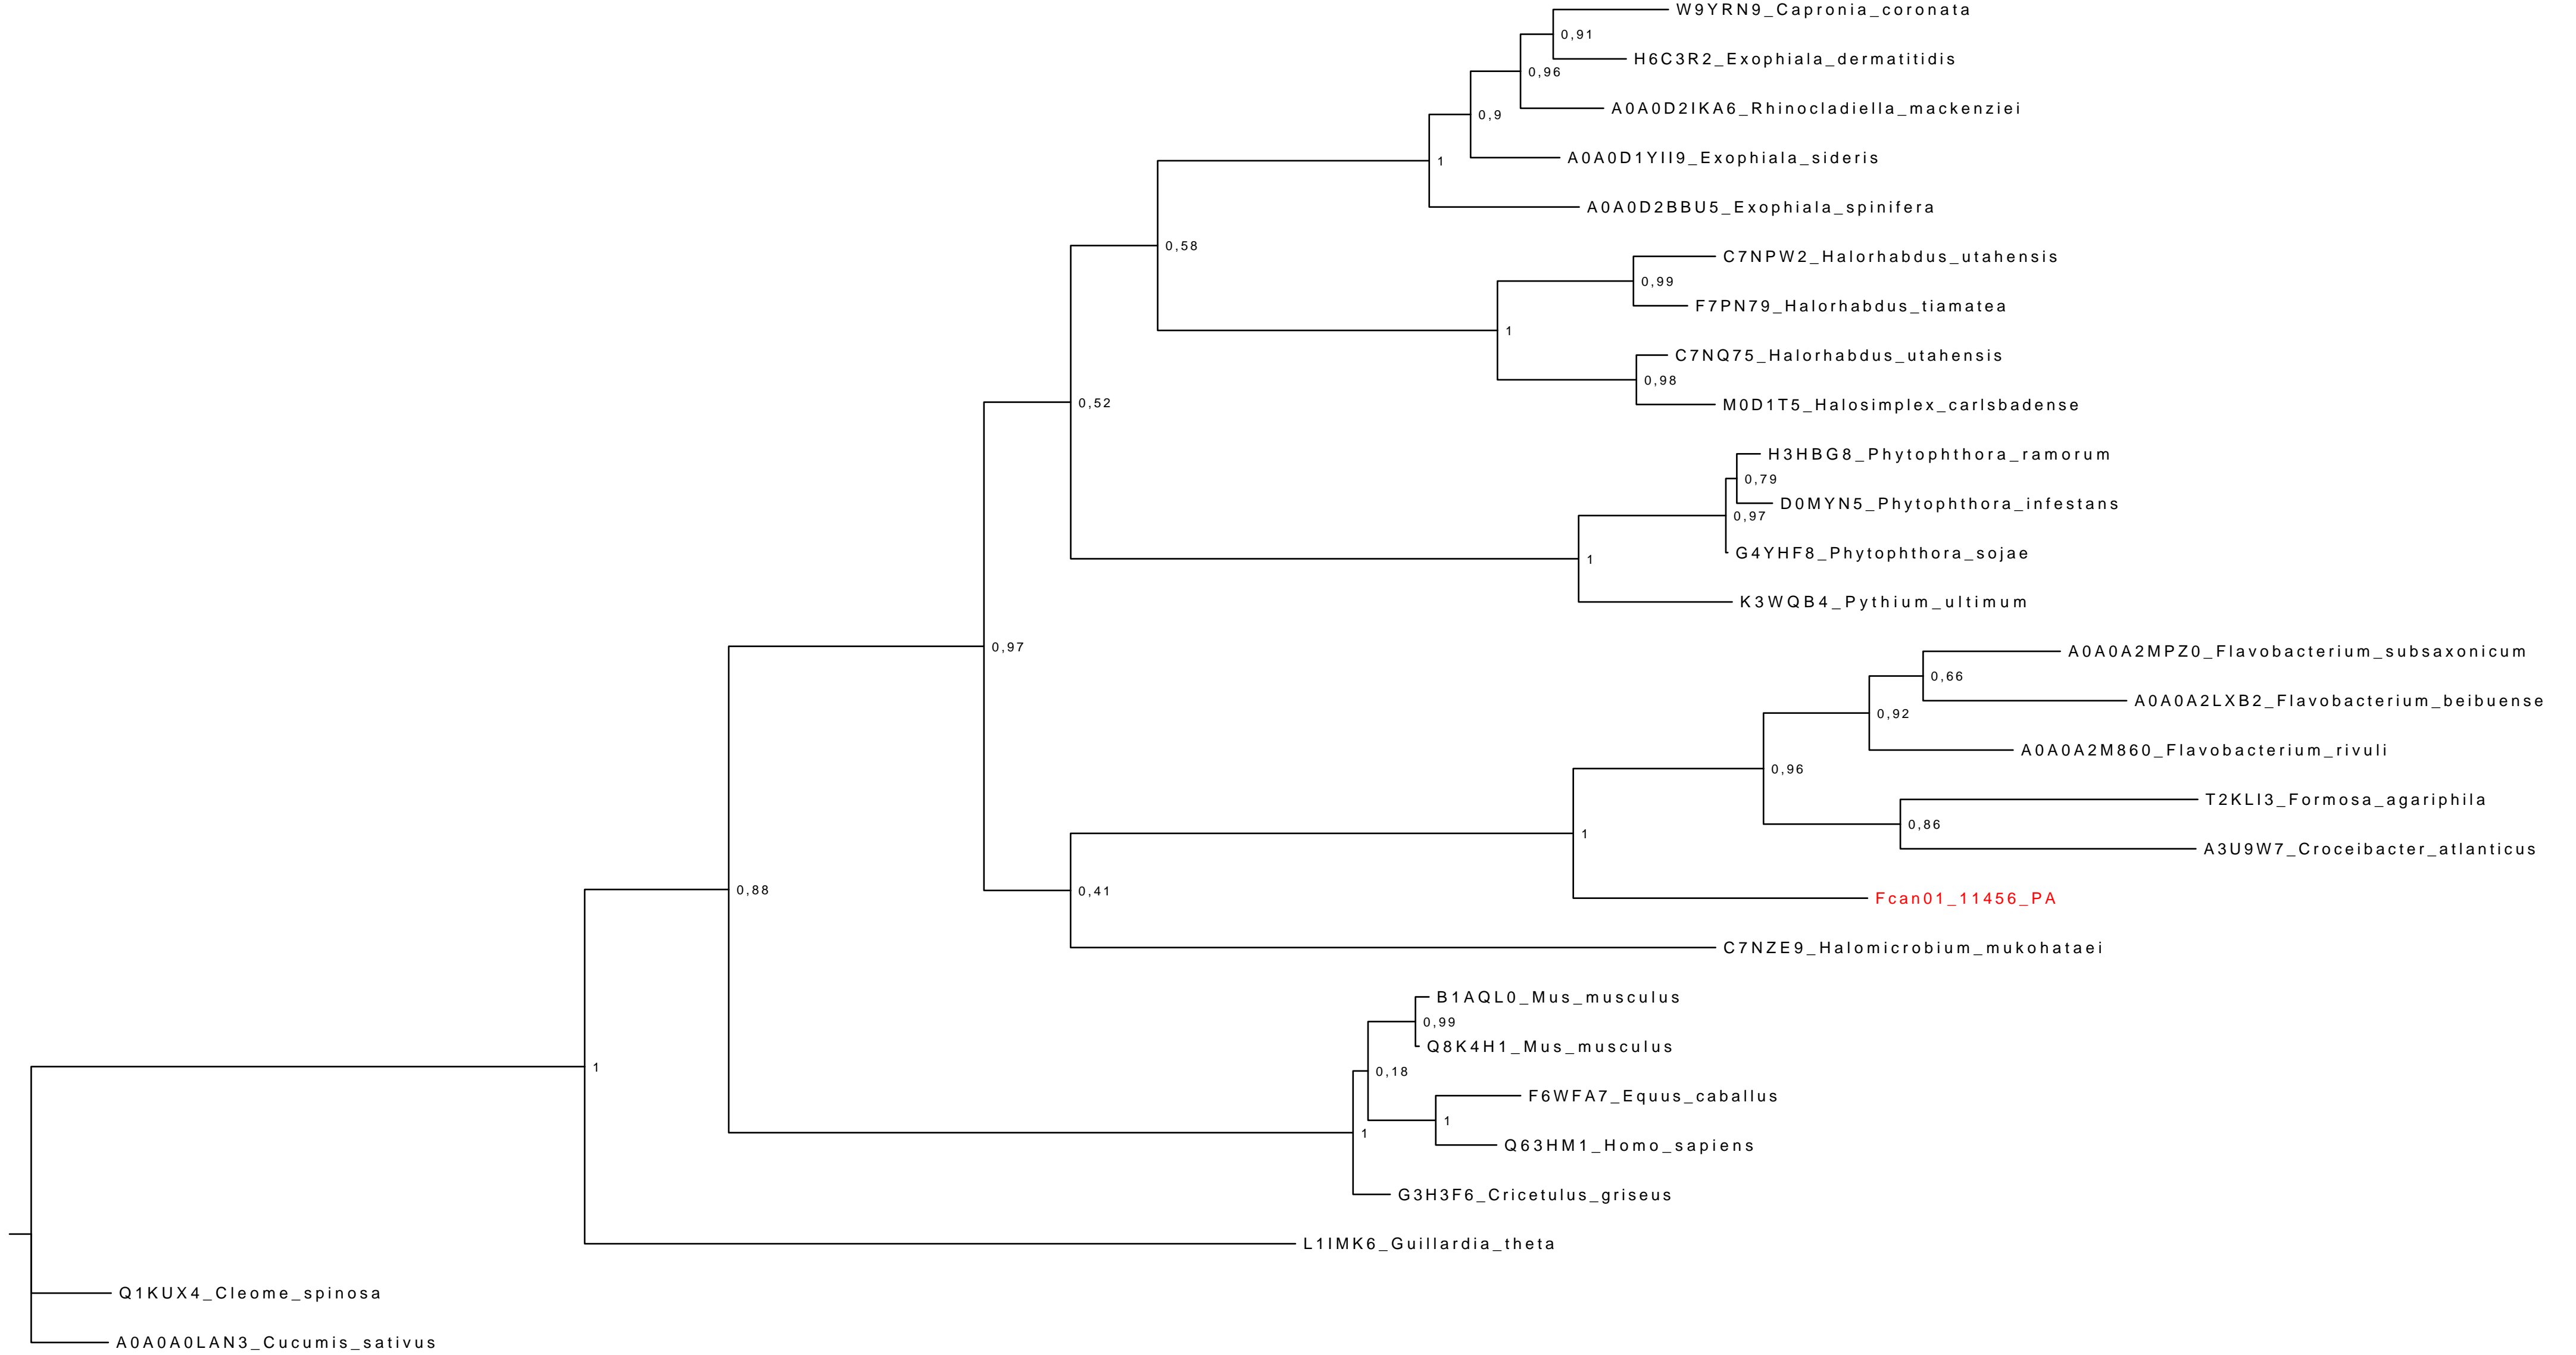

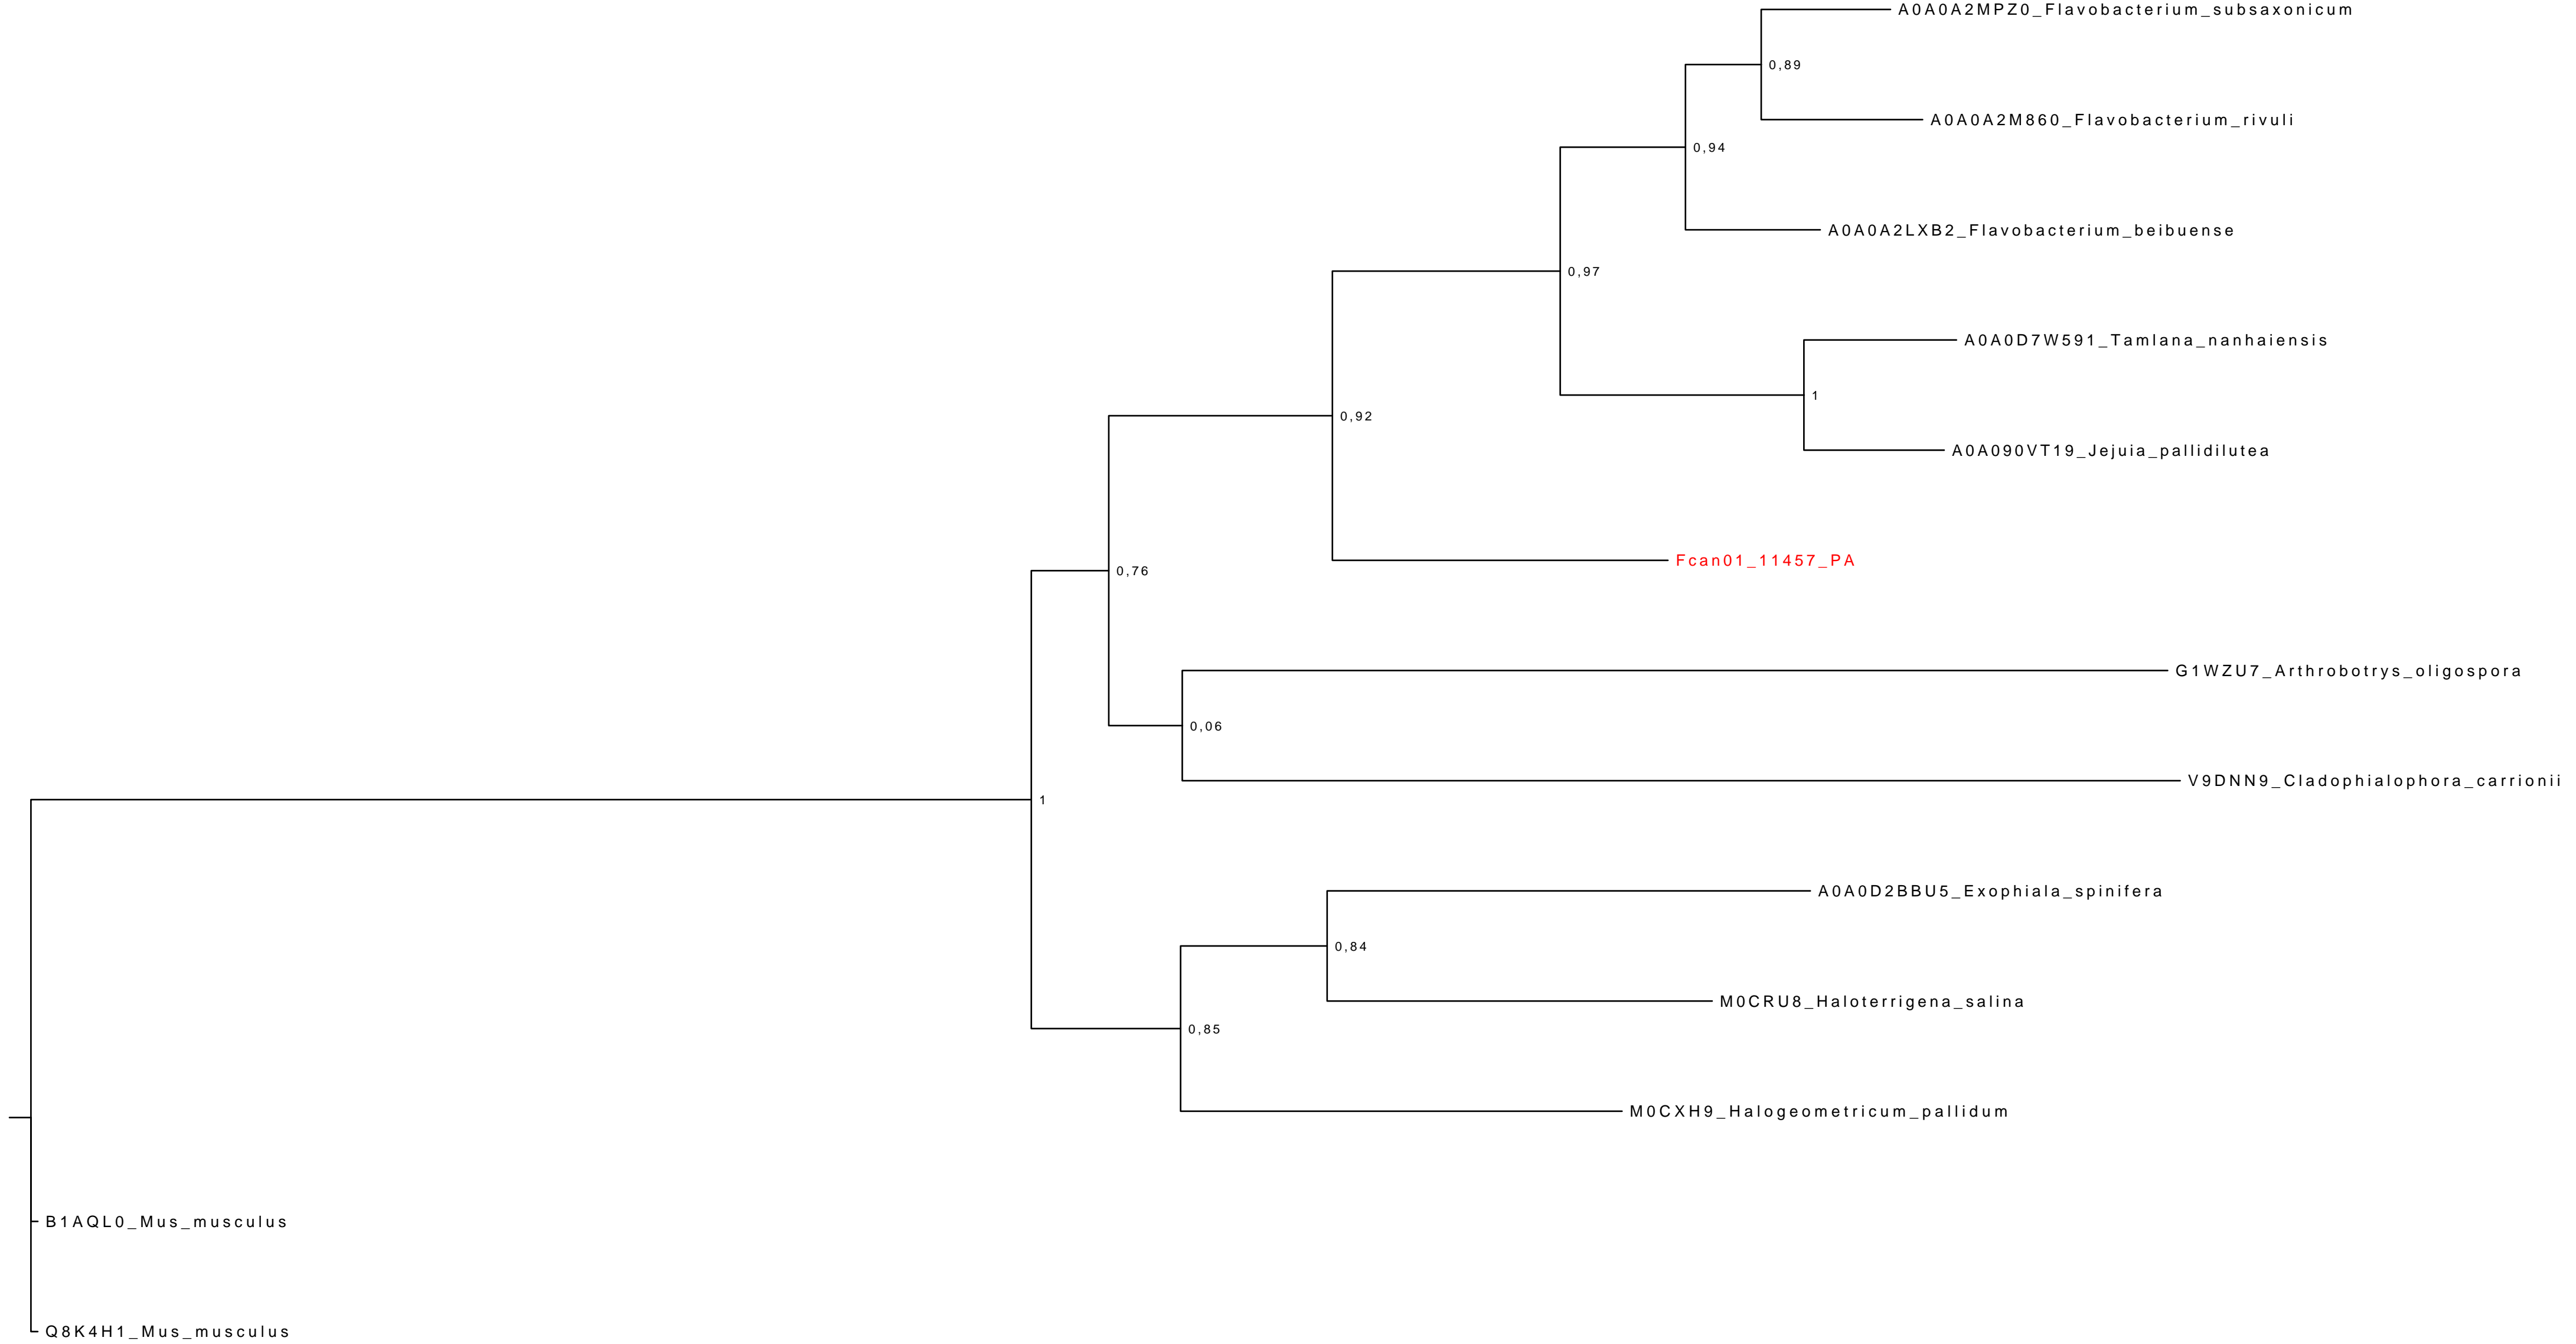

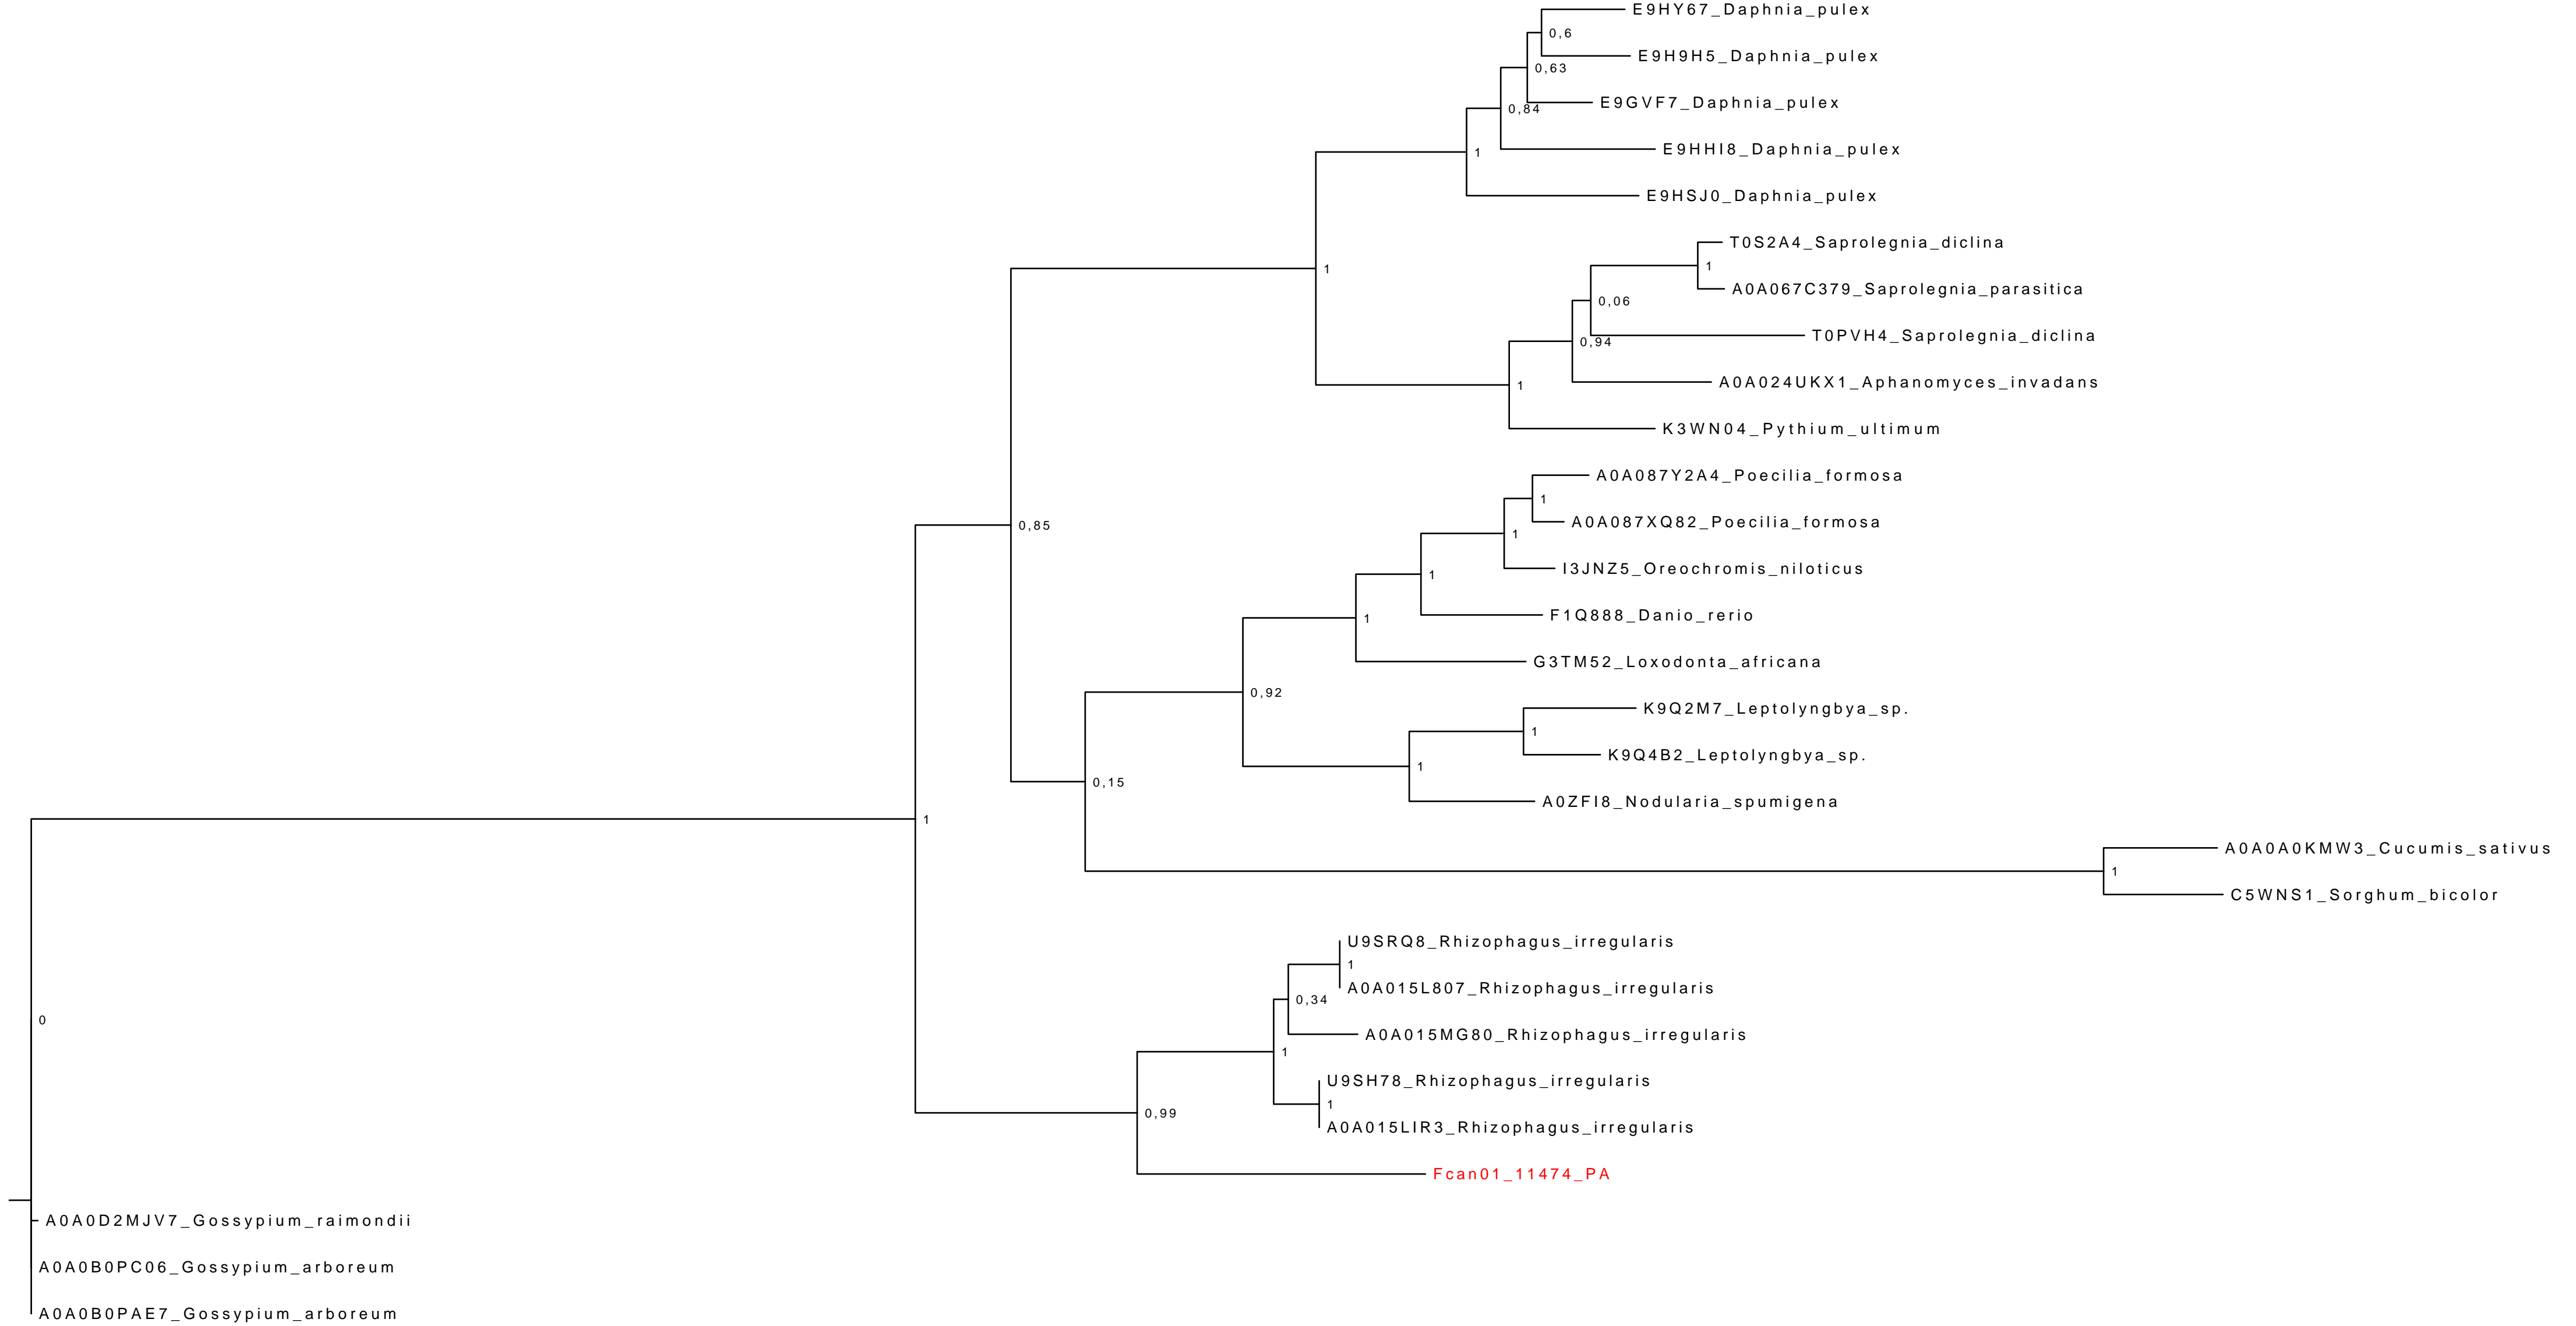

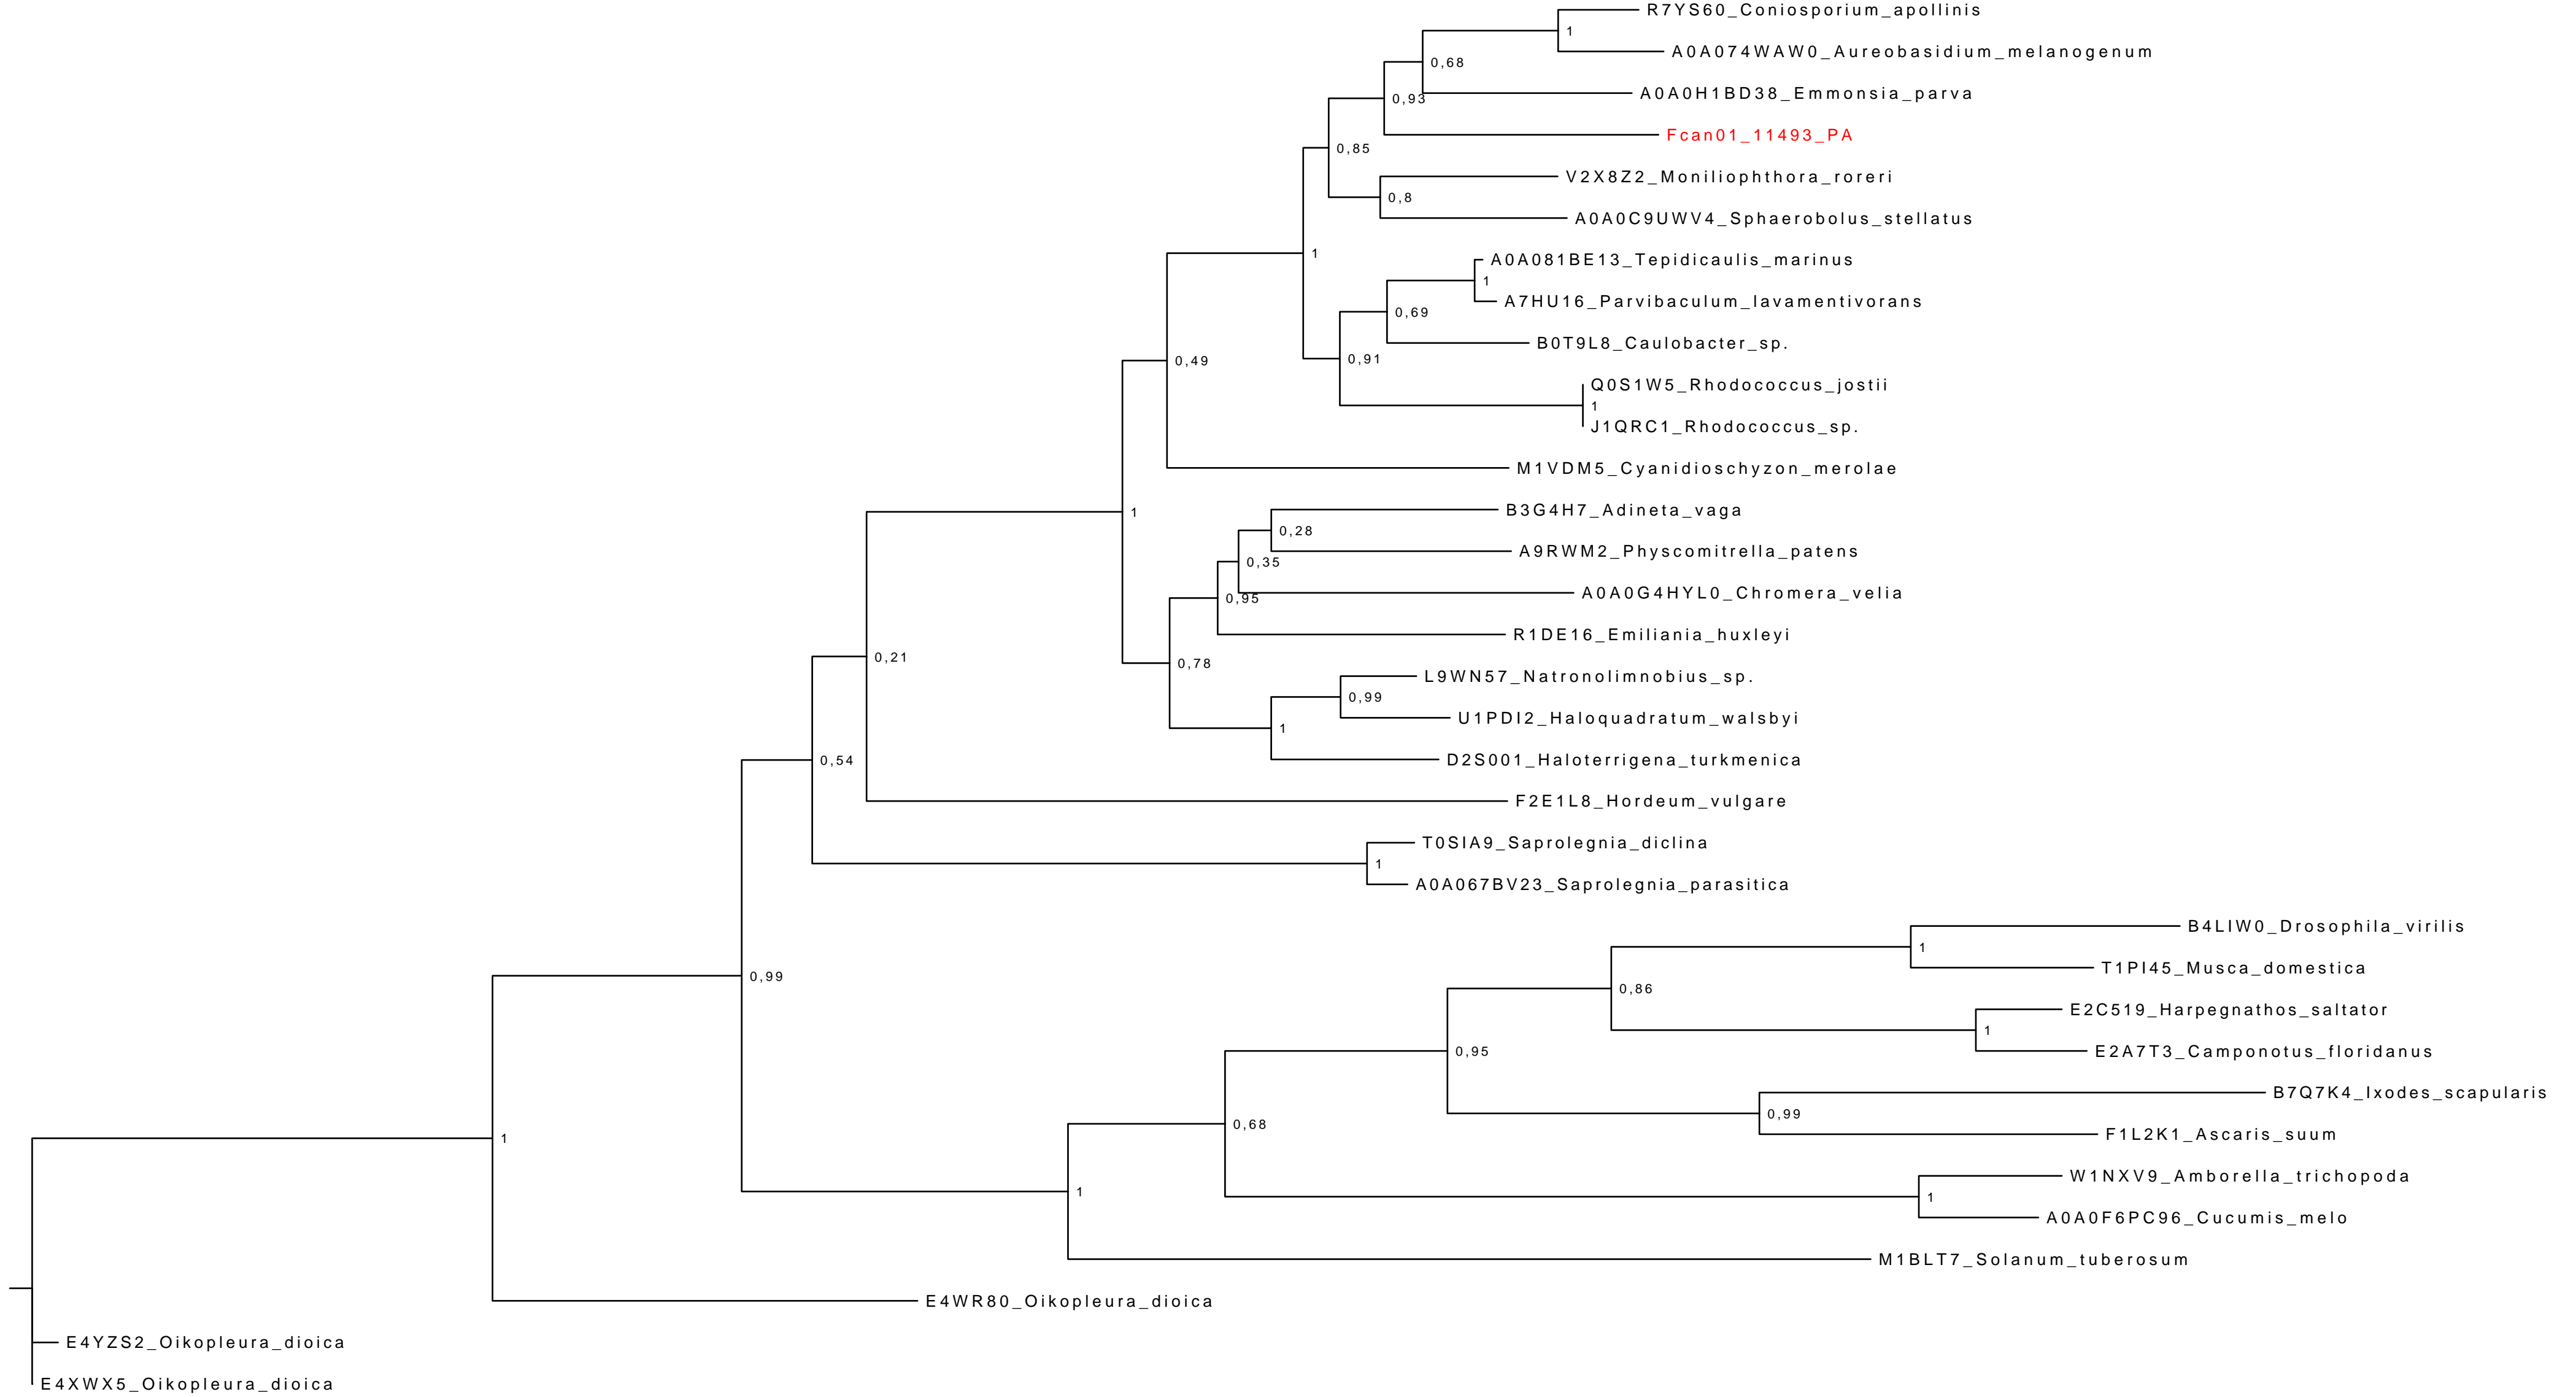

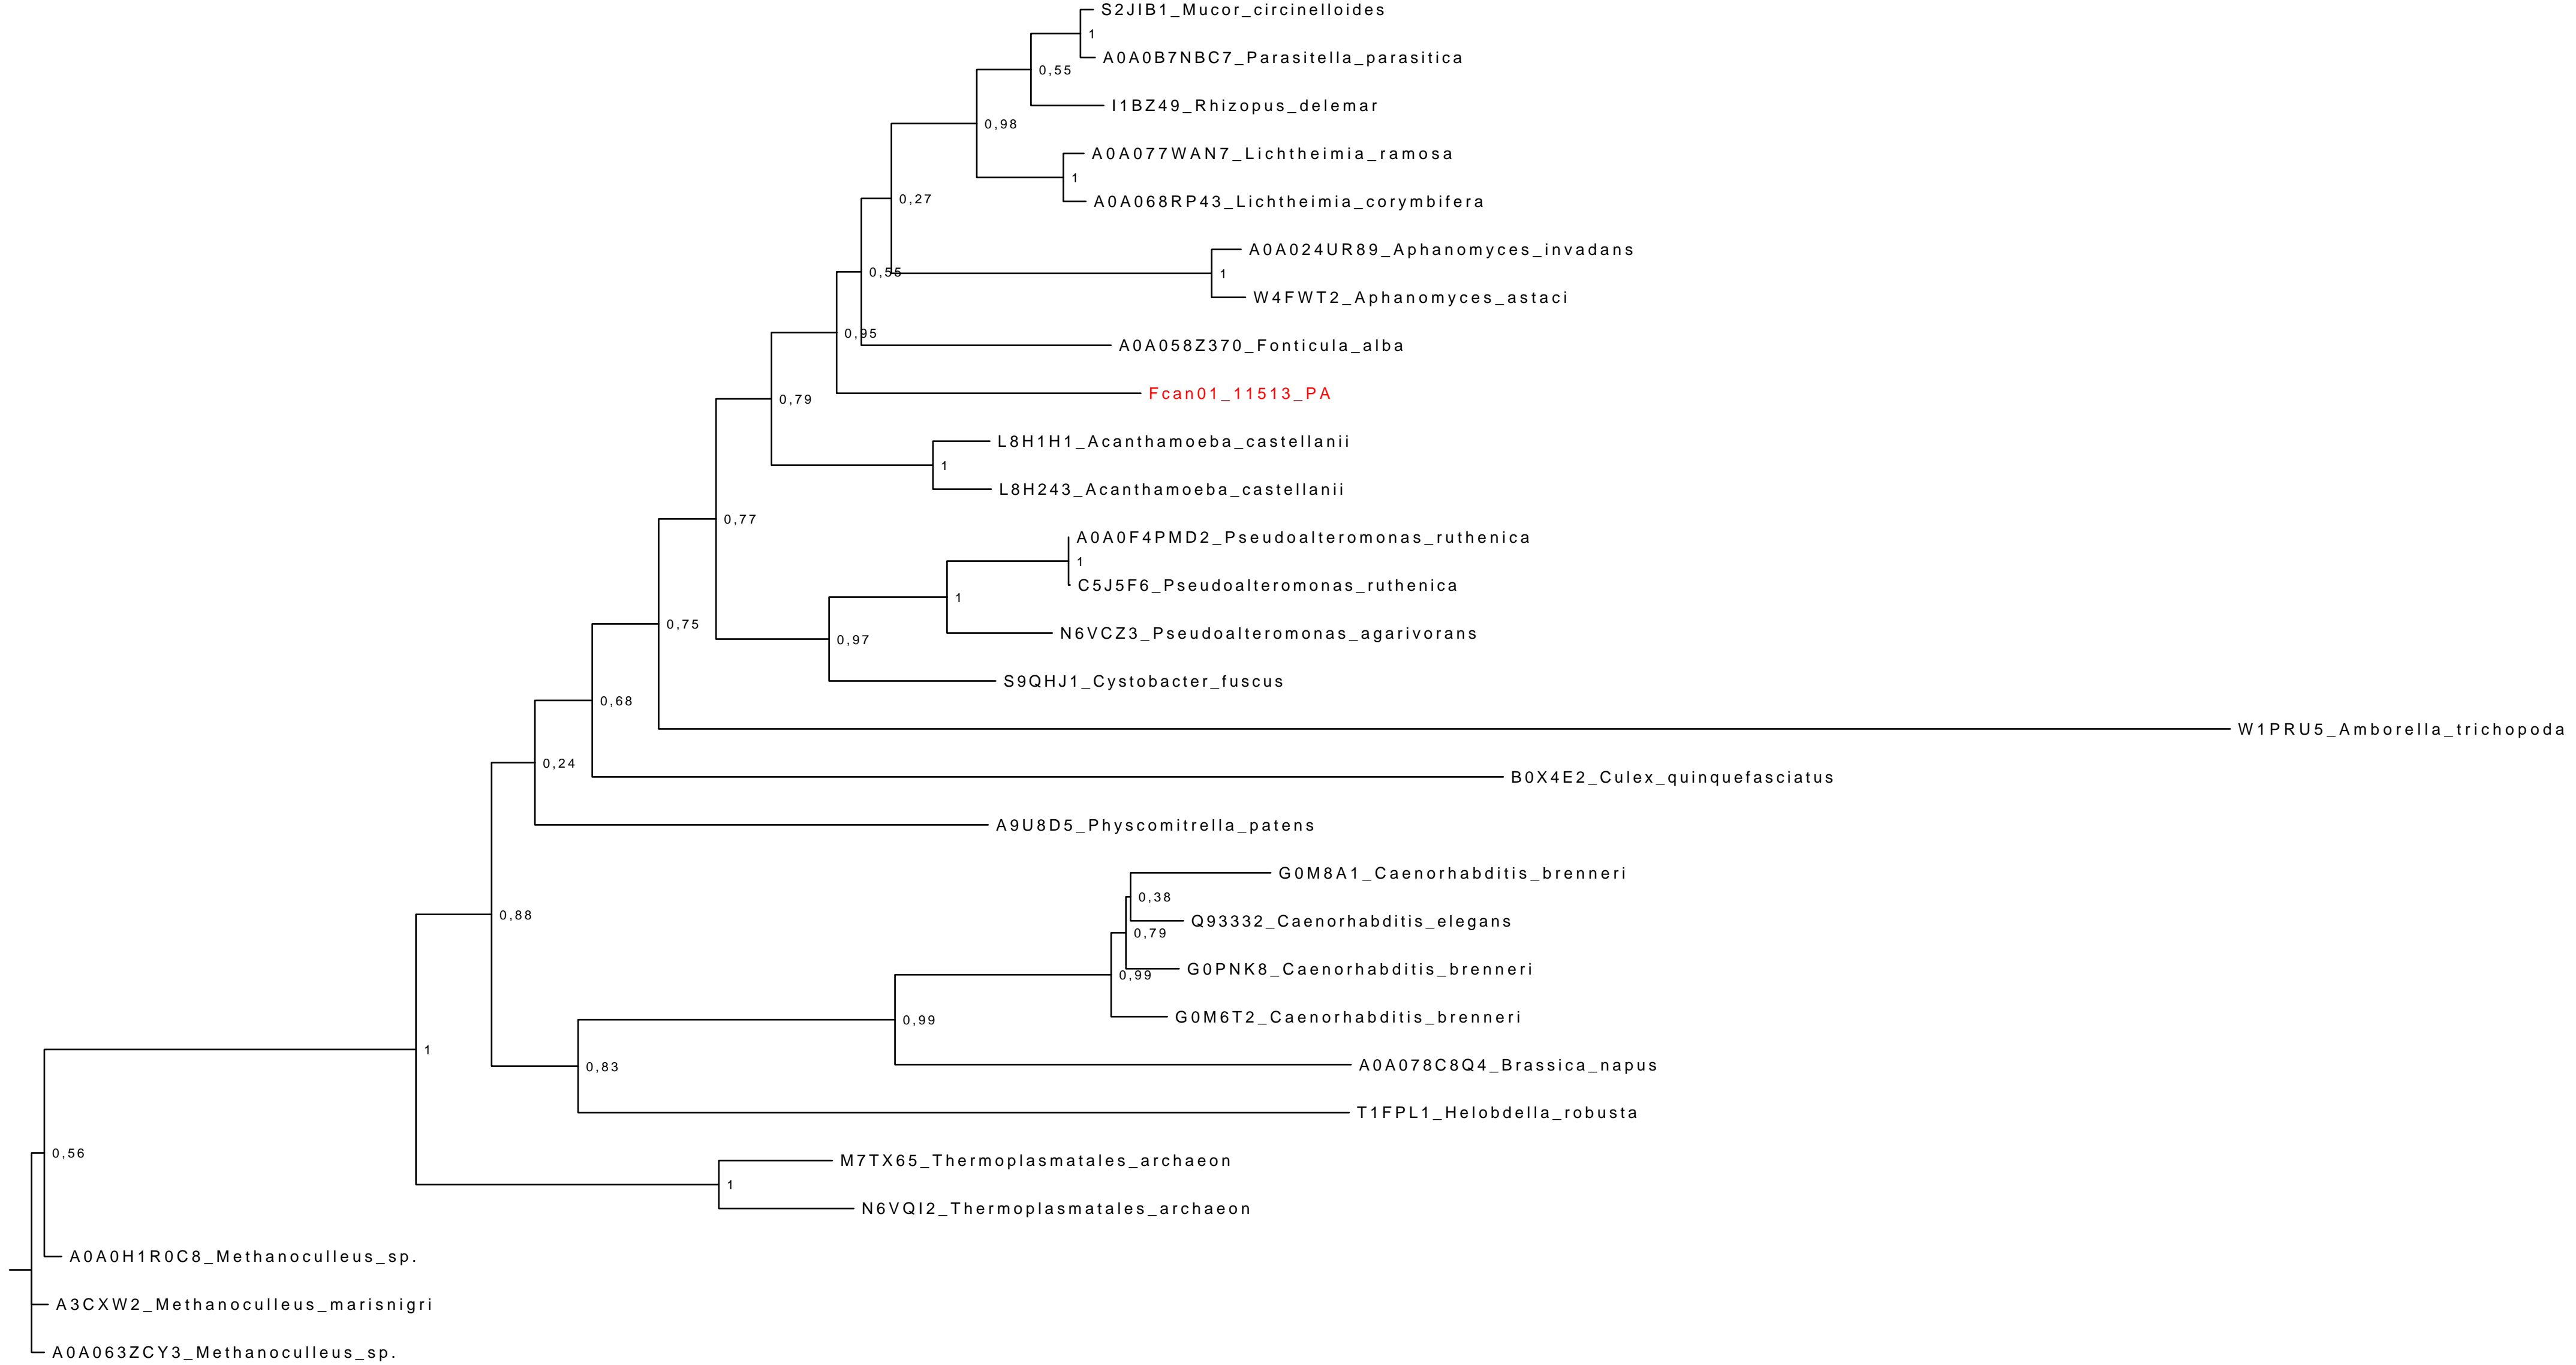



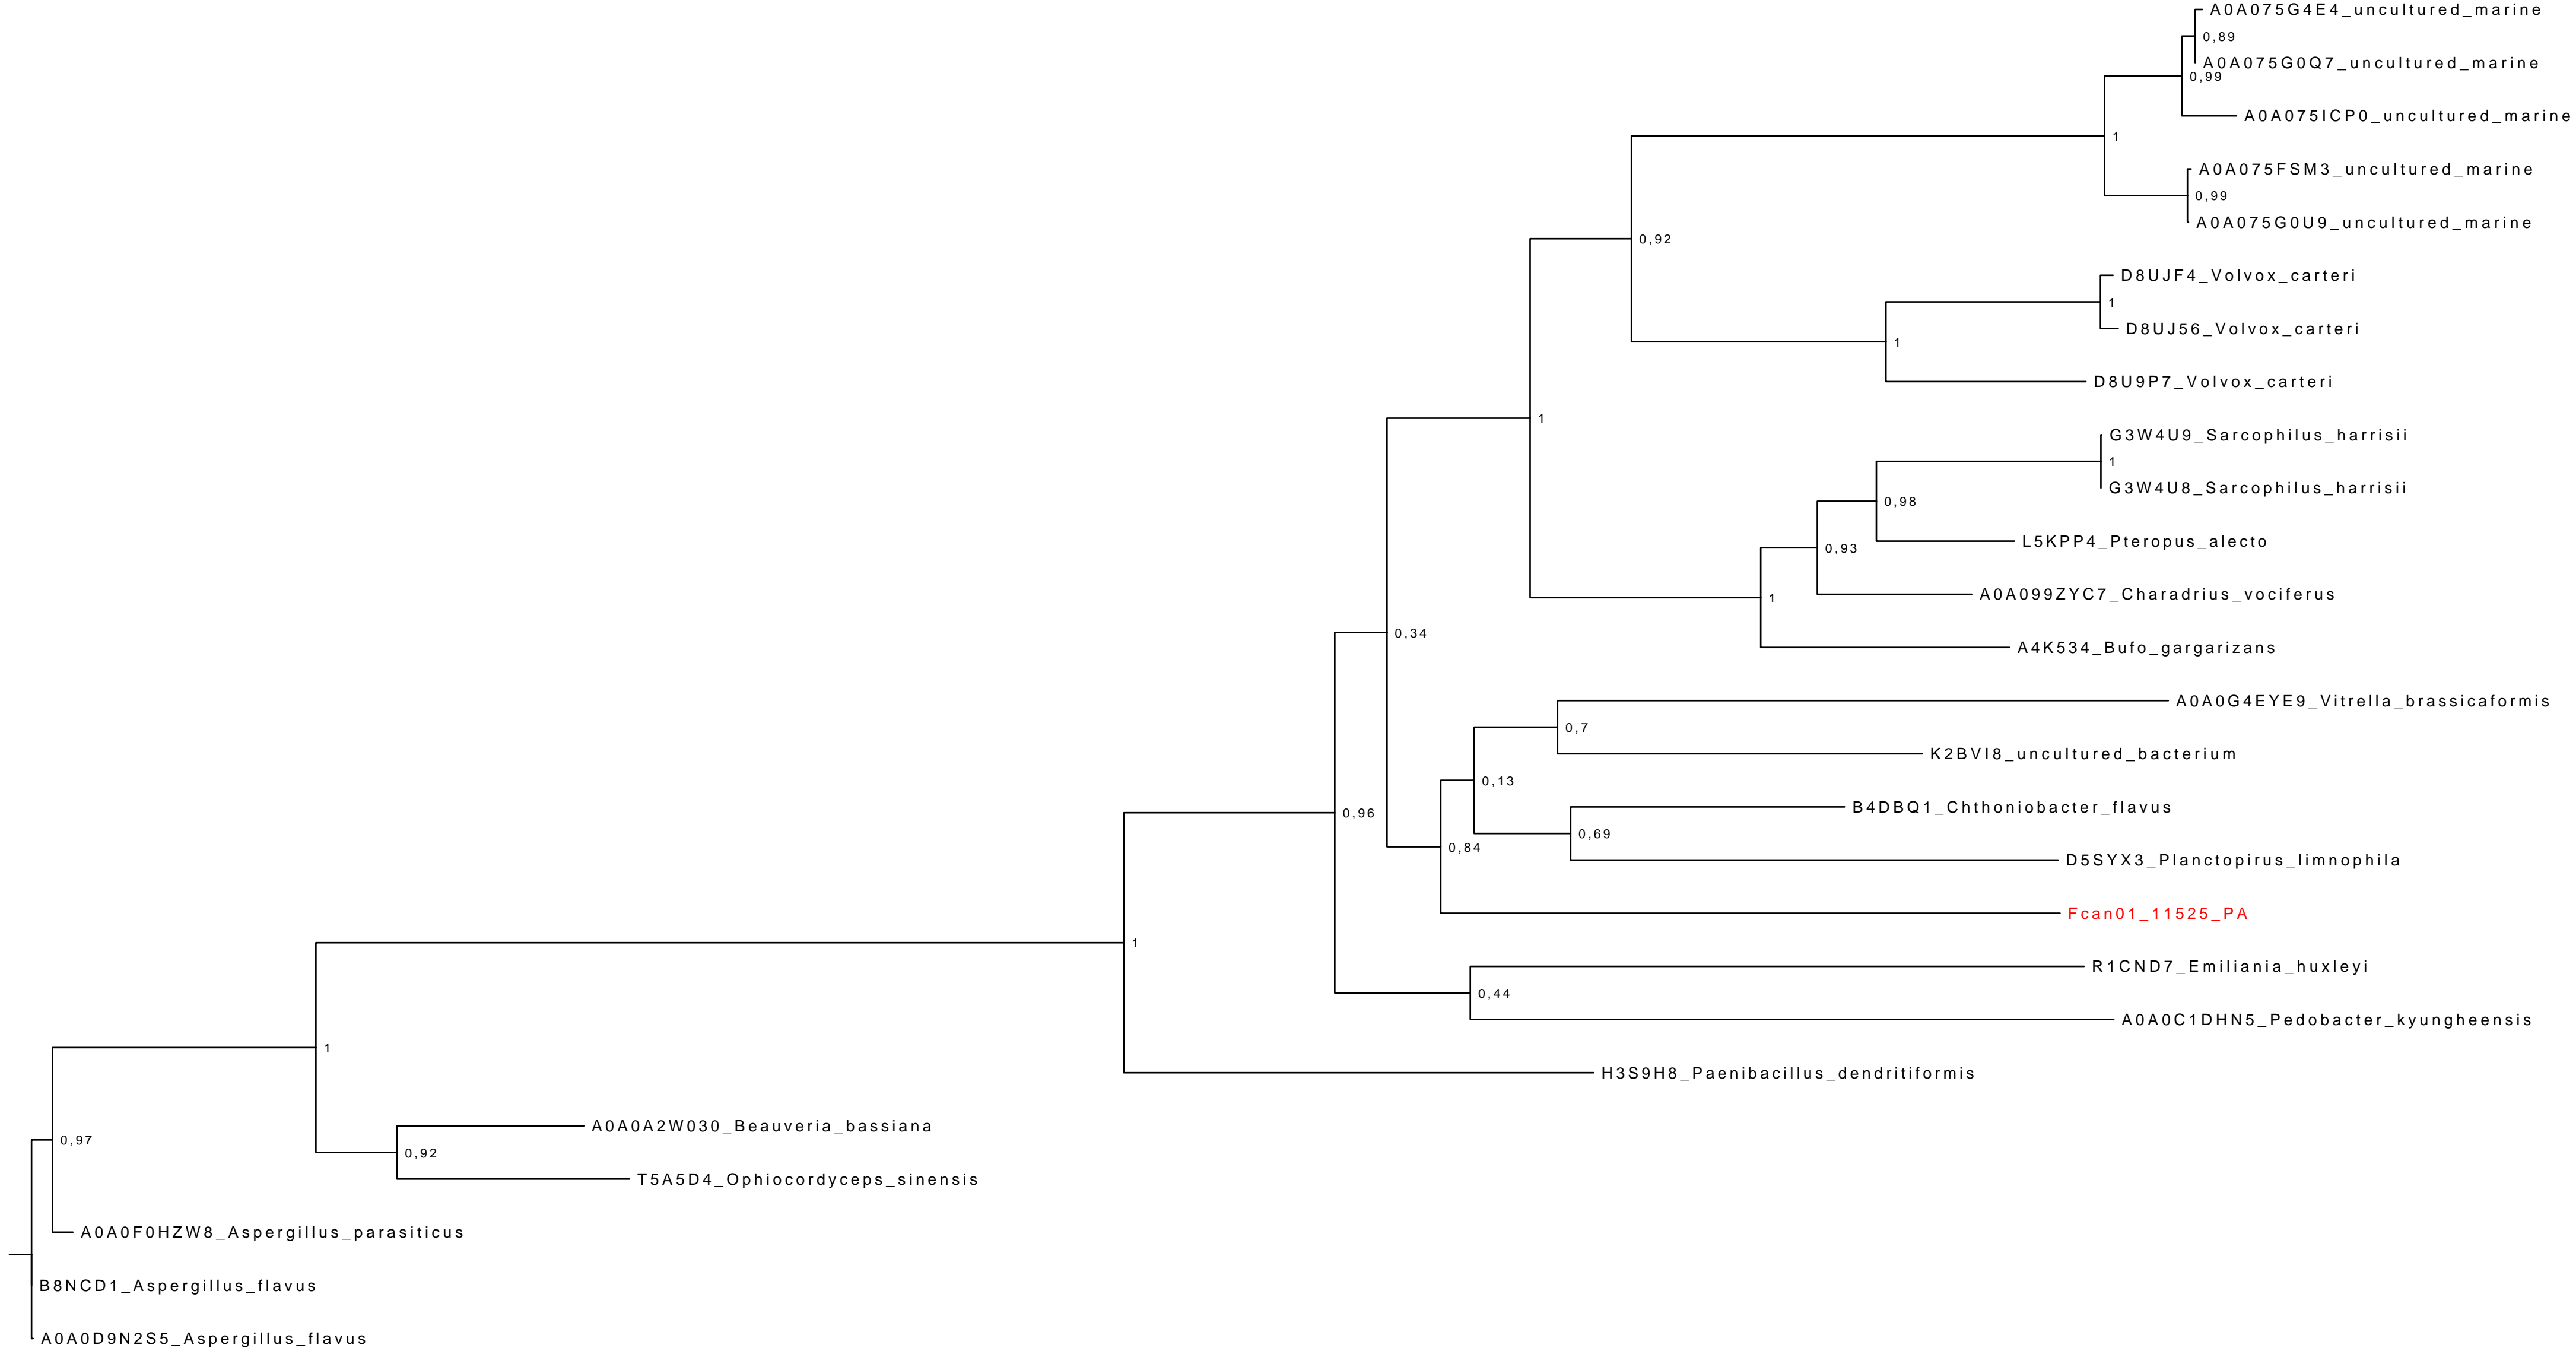

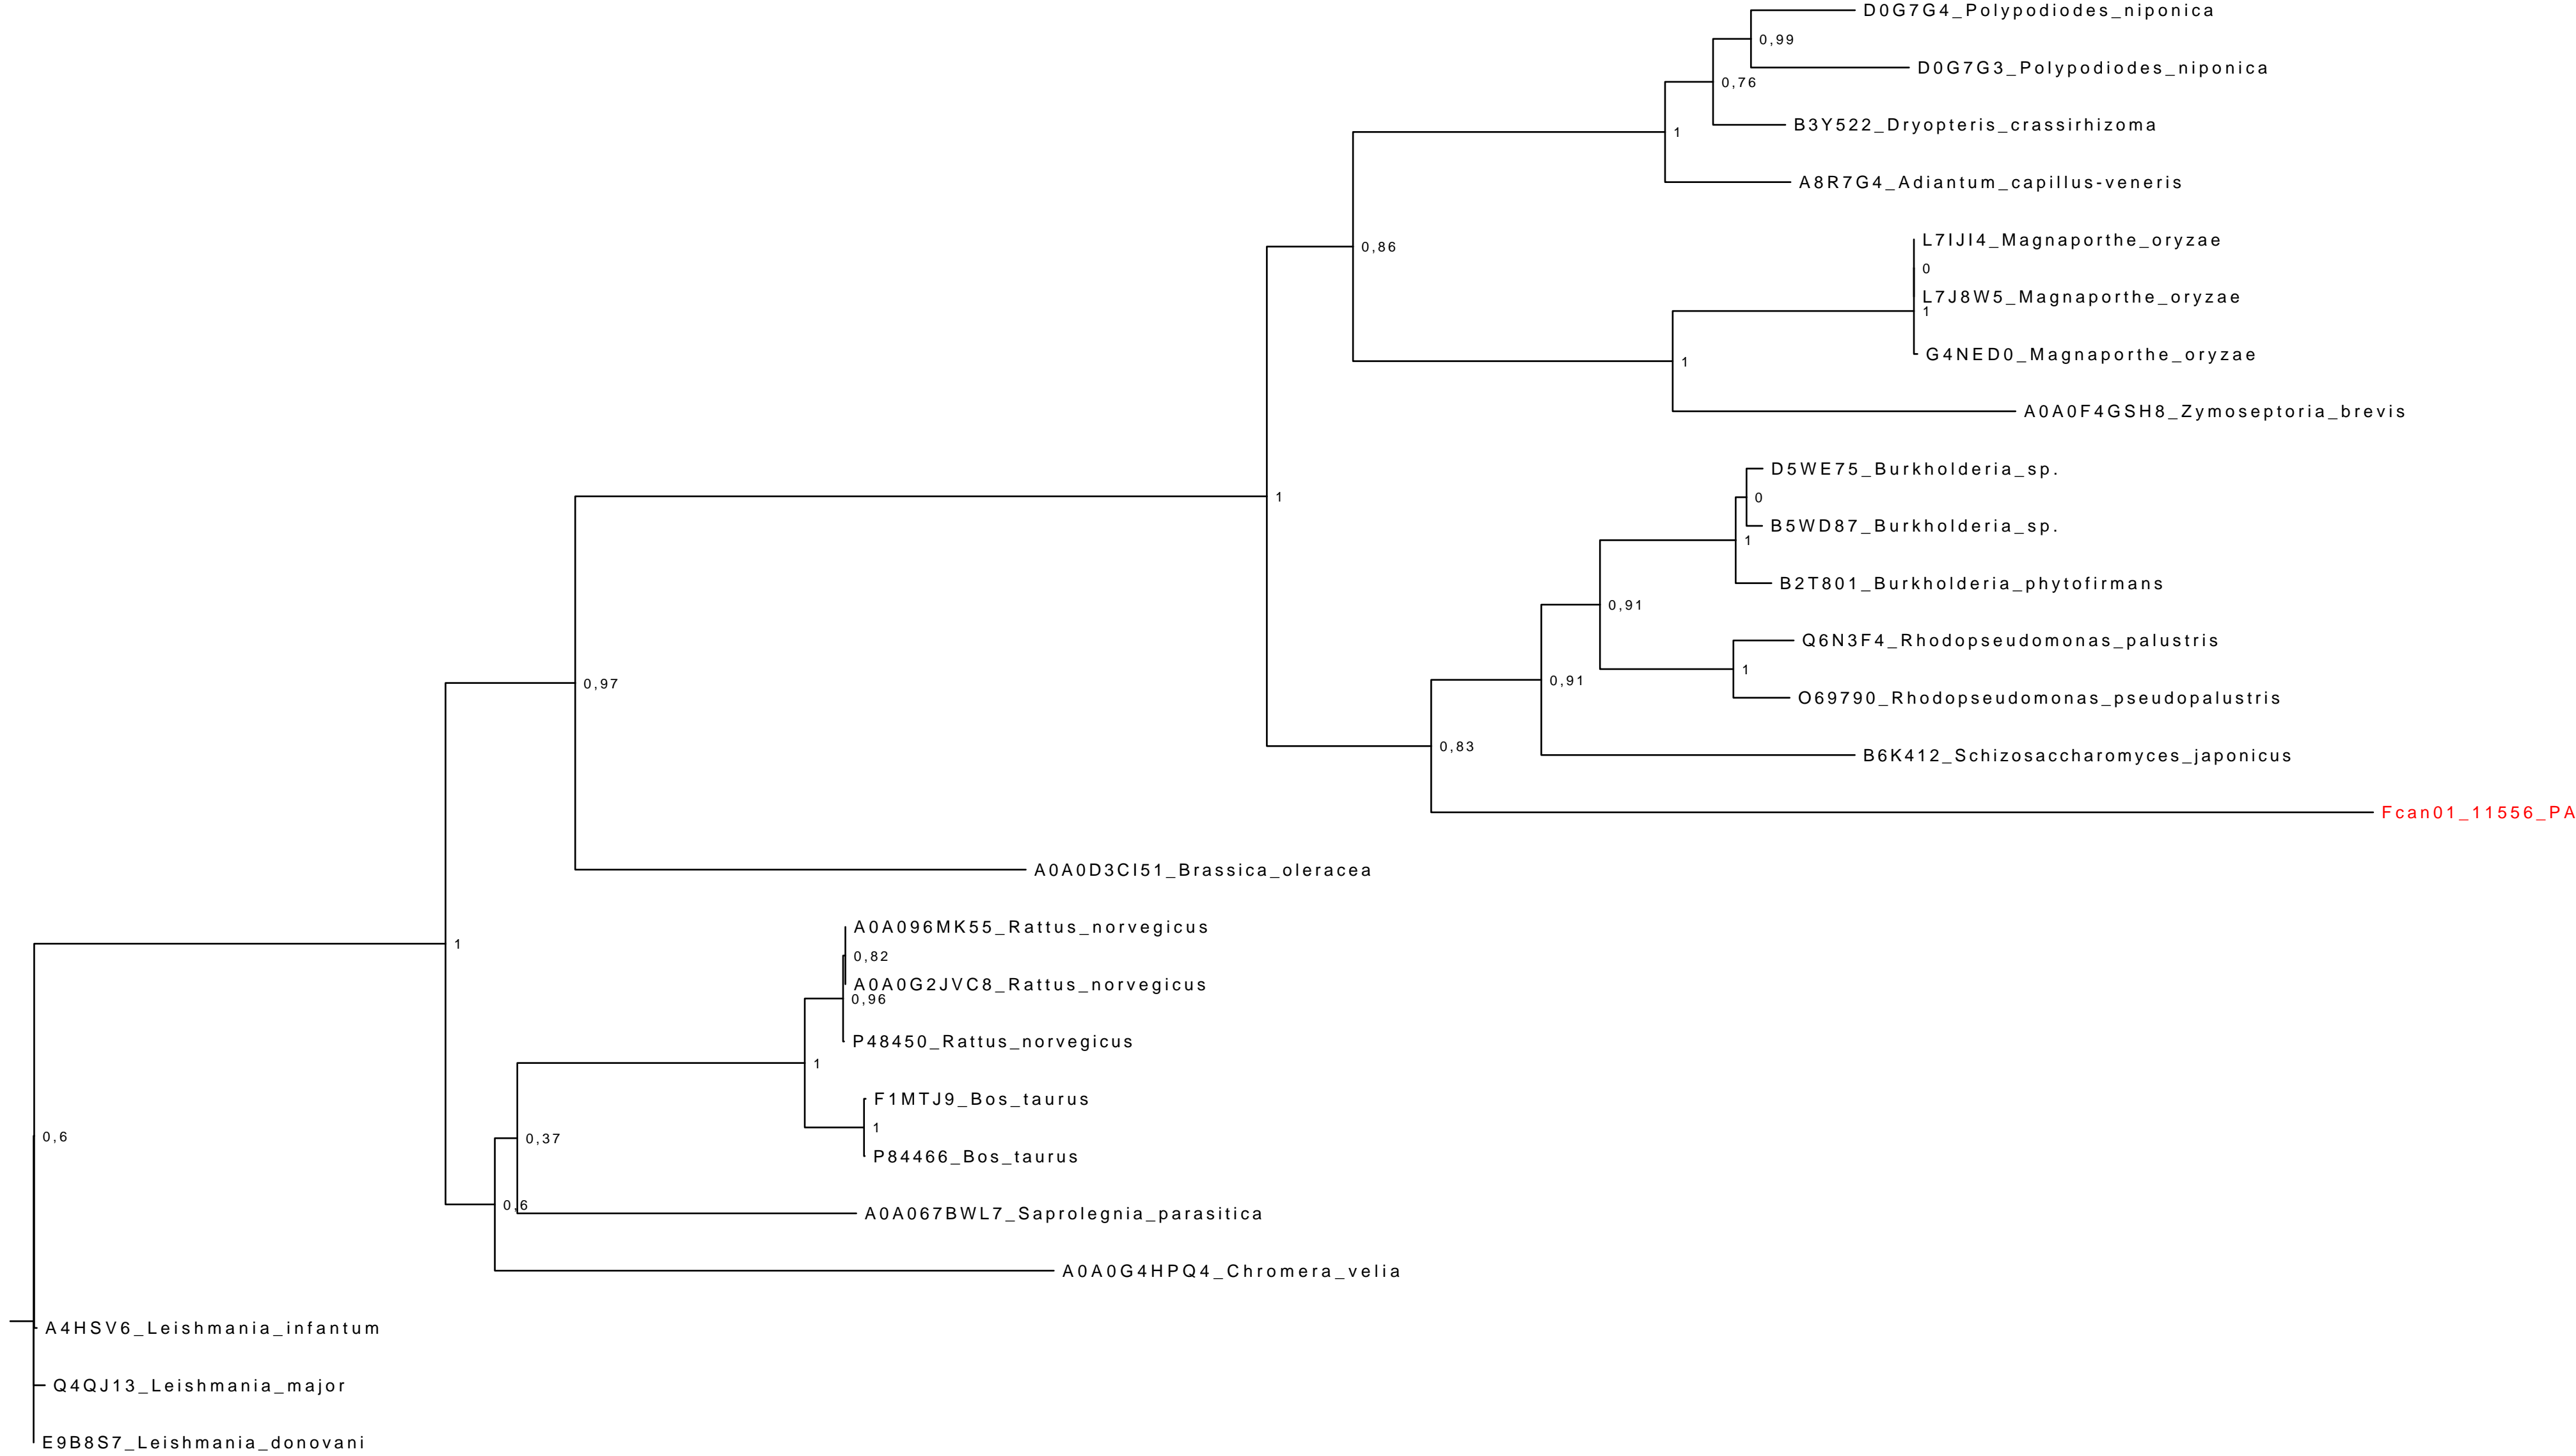

0.5

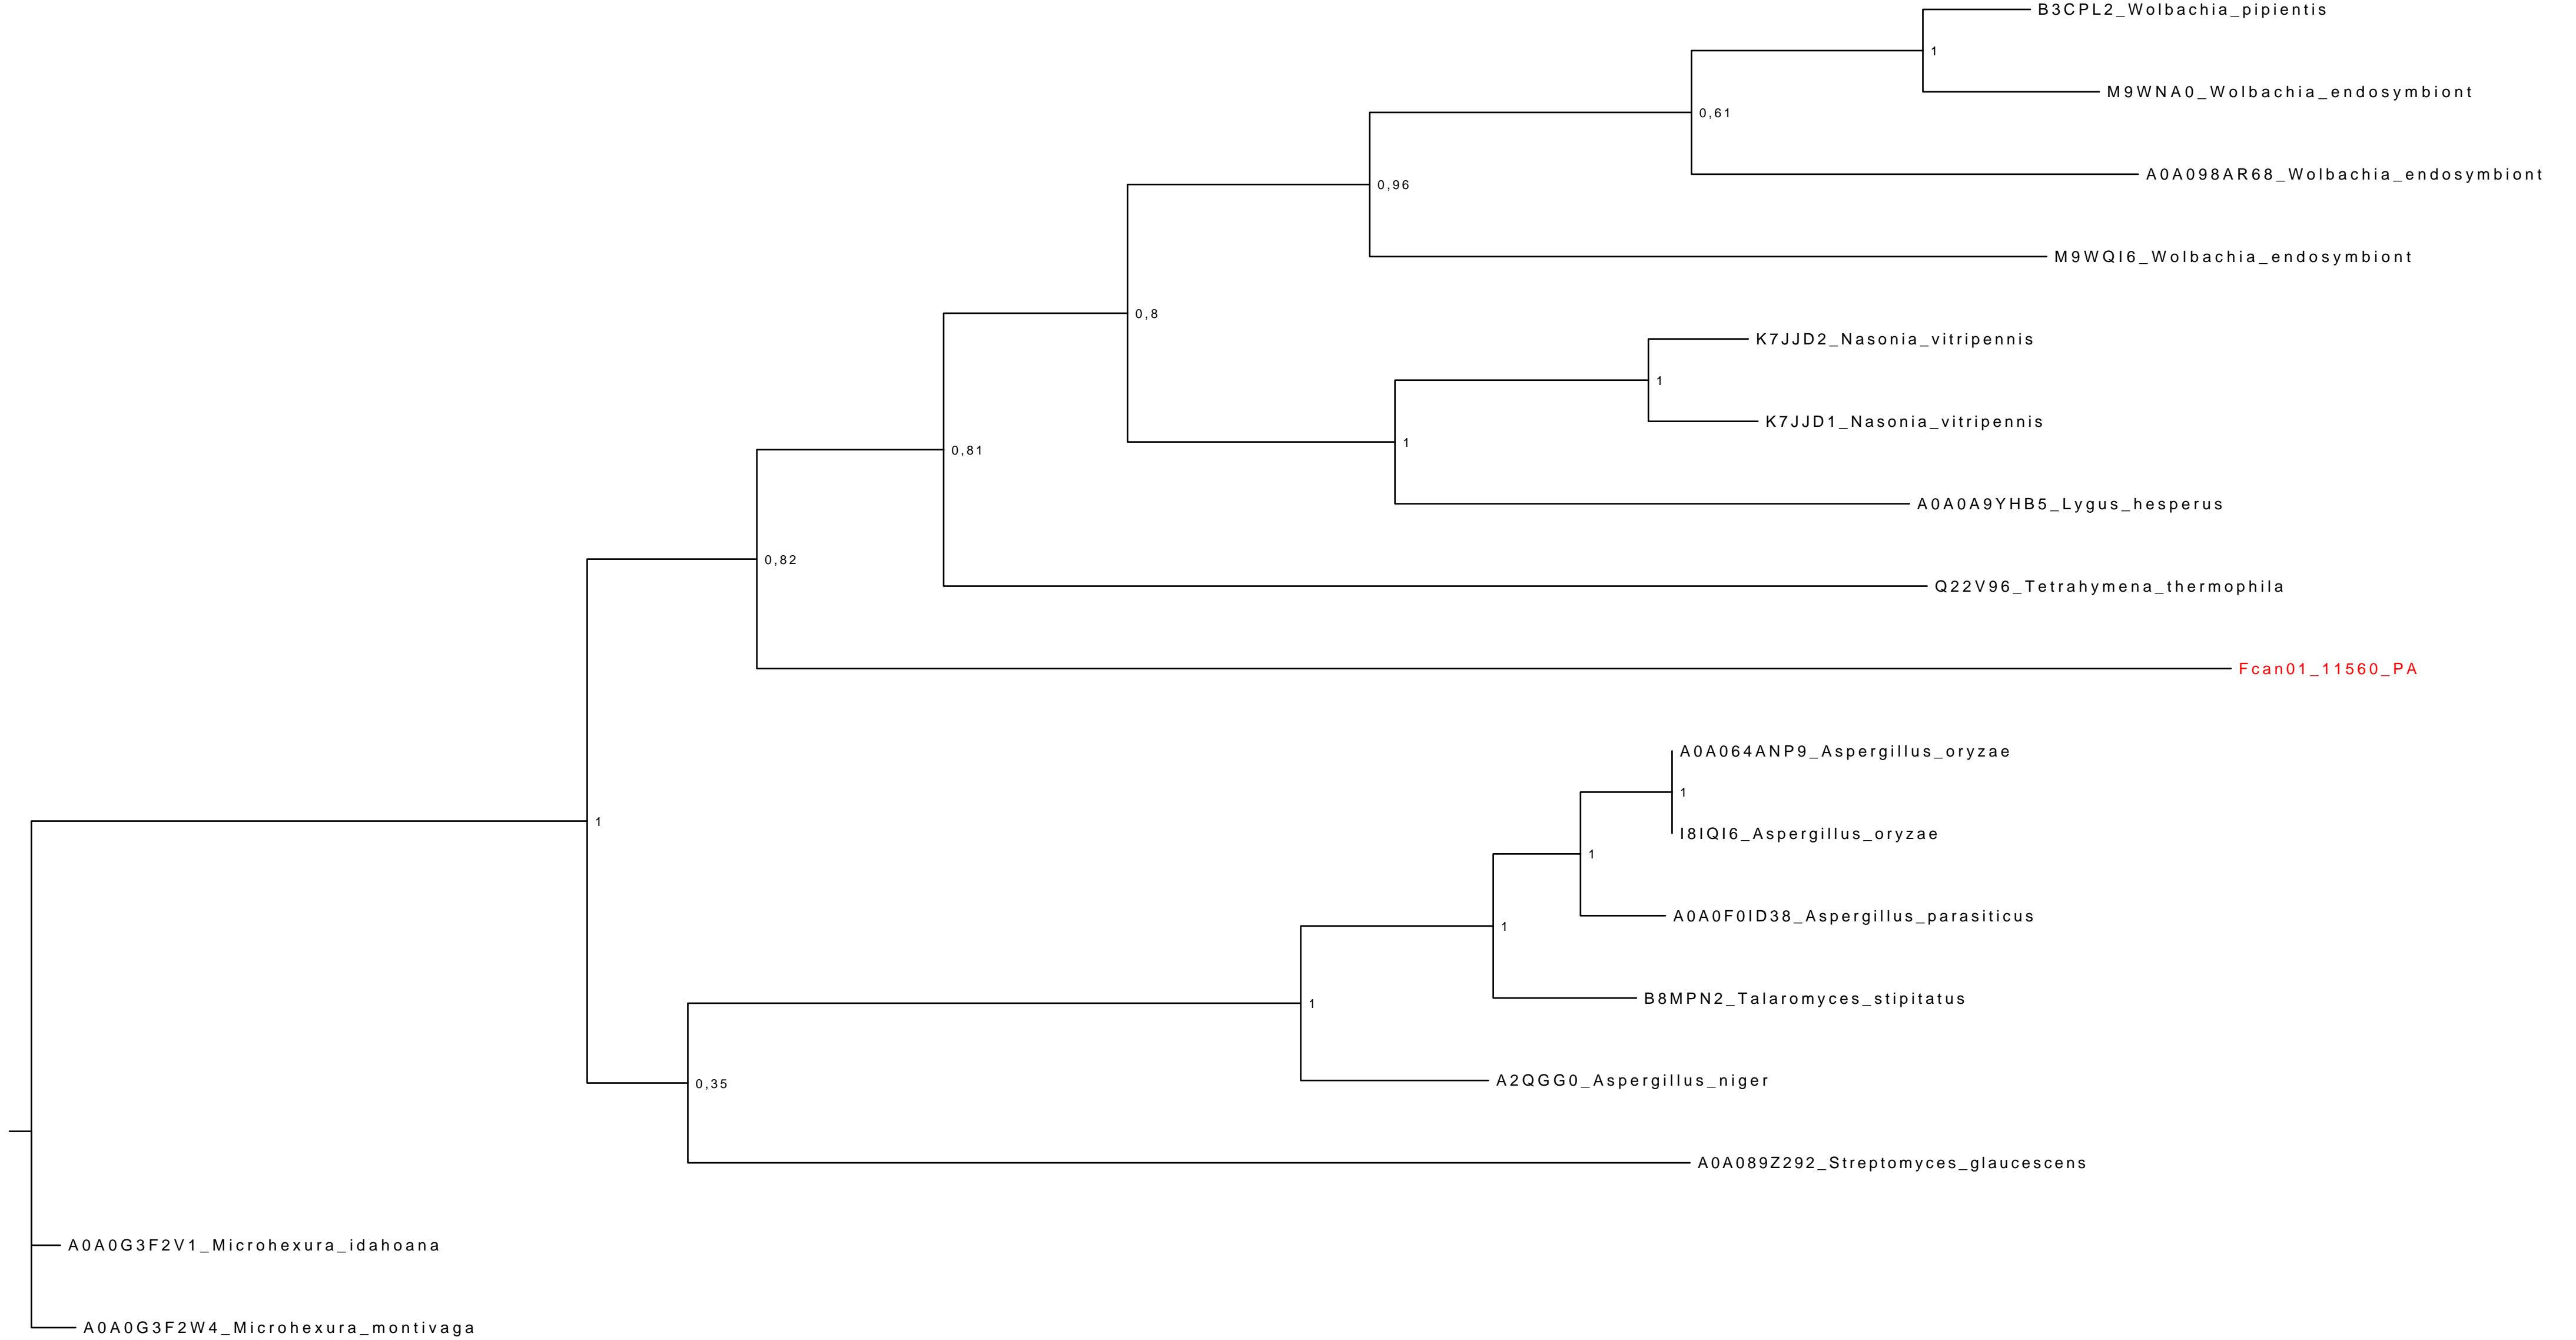

0.4

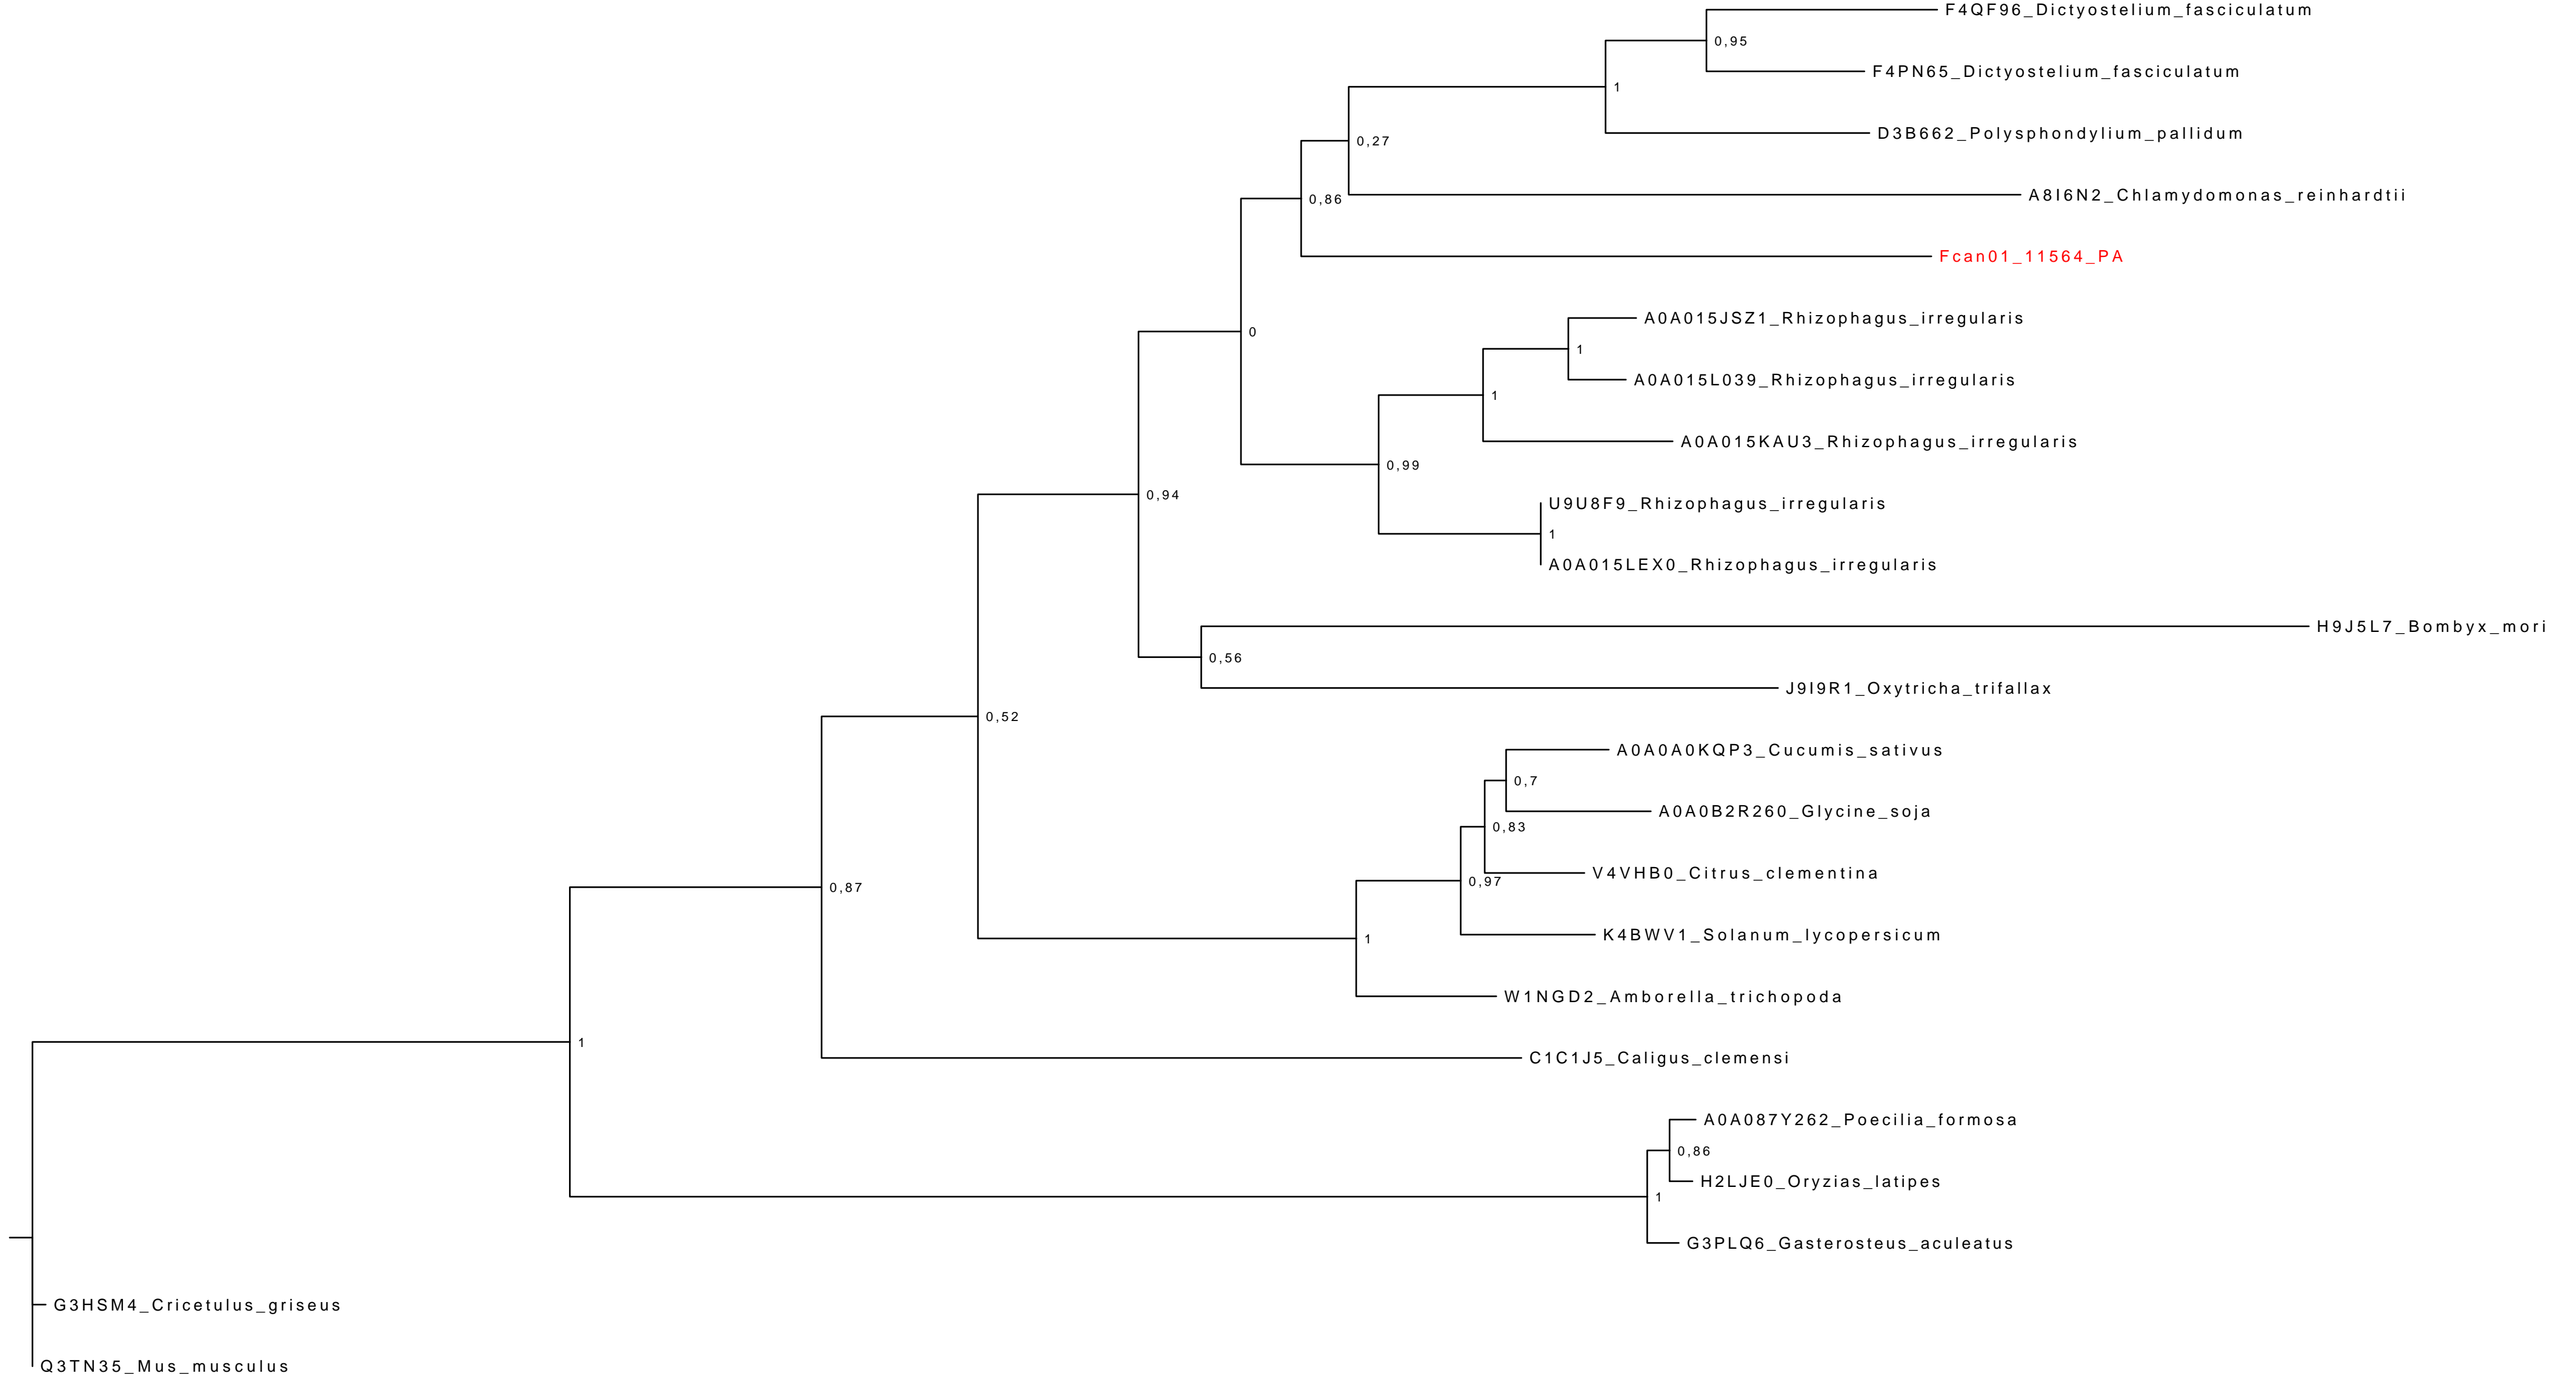

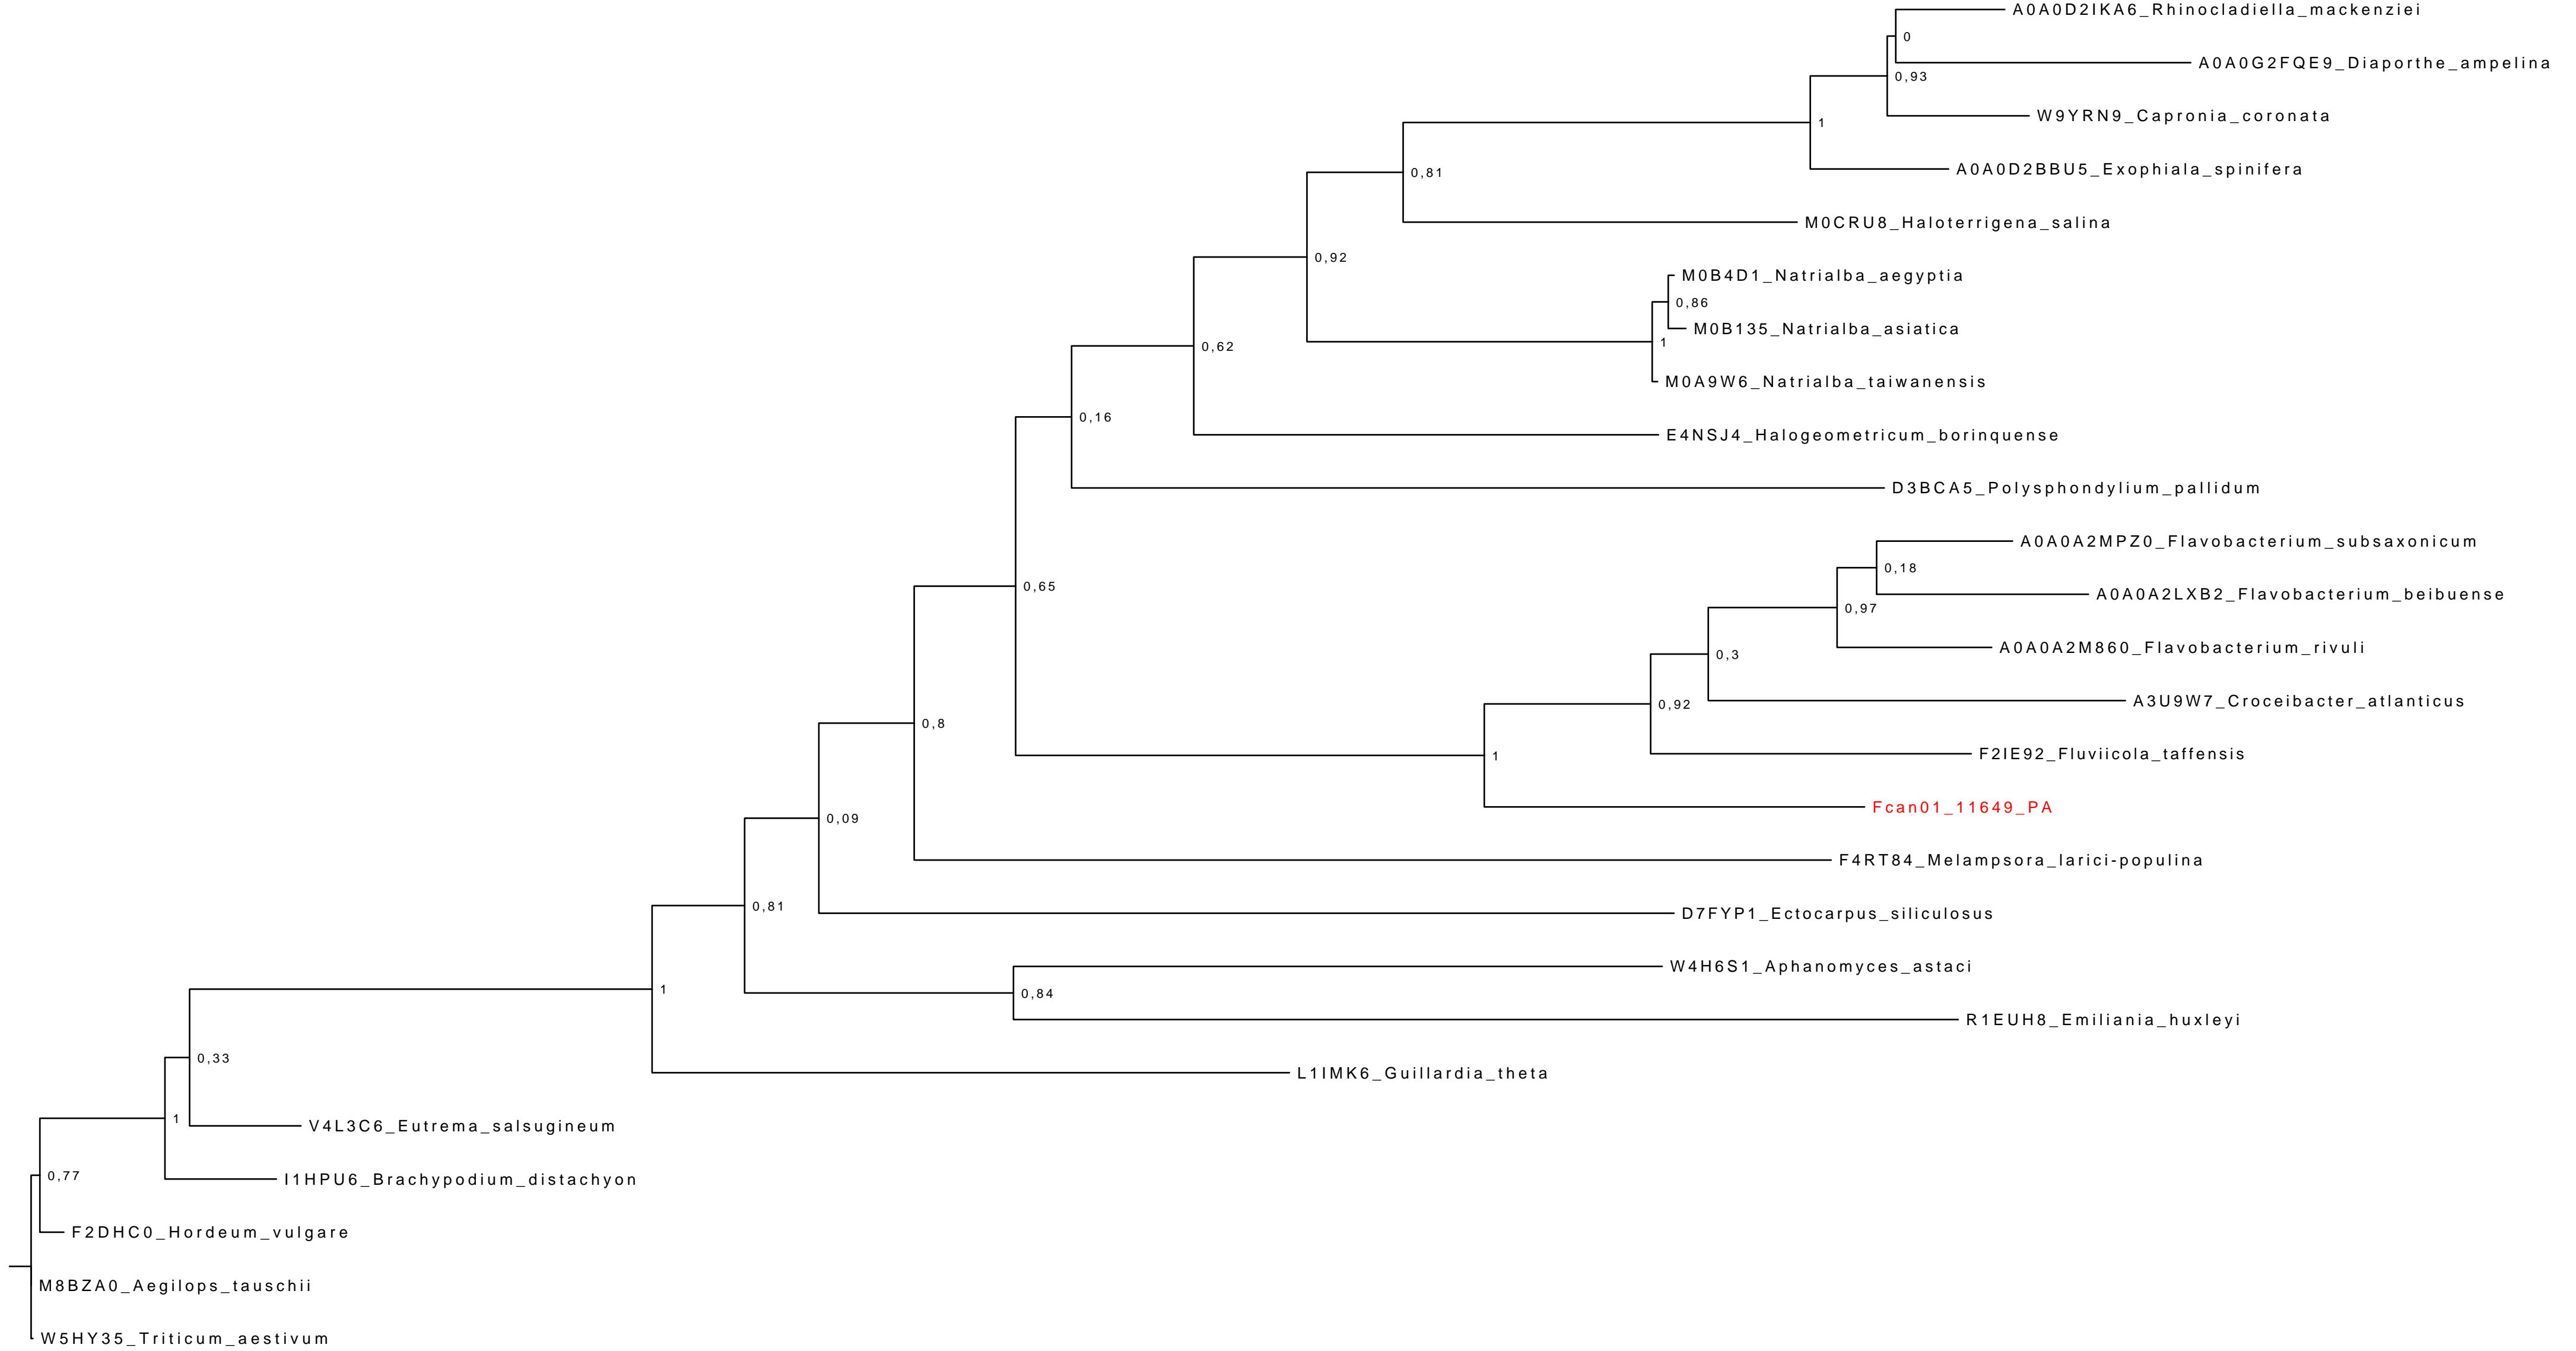

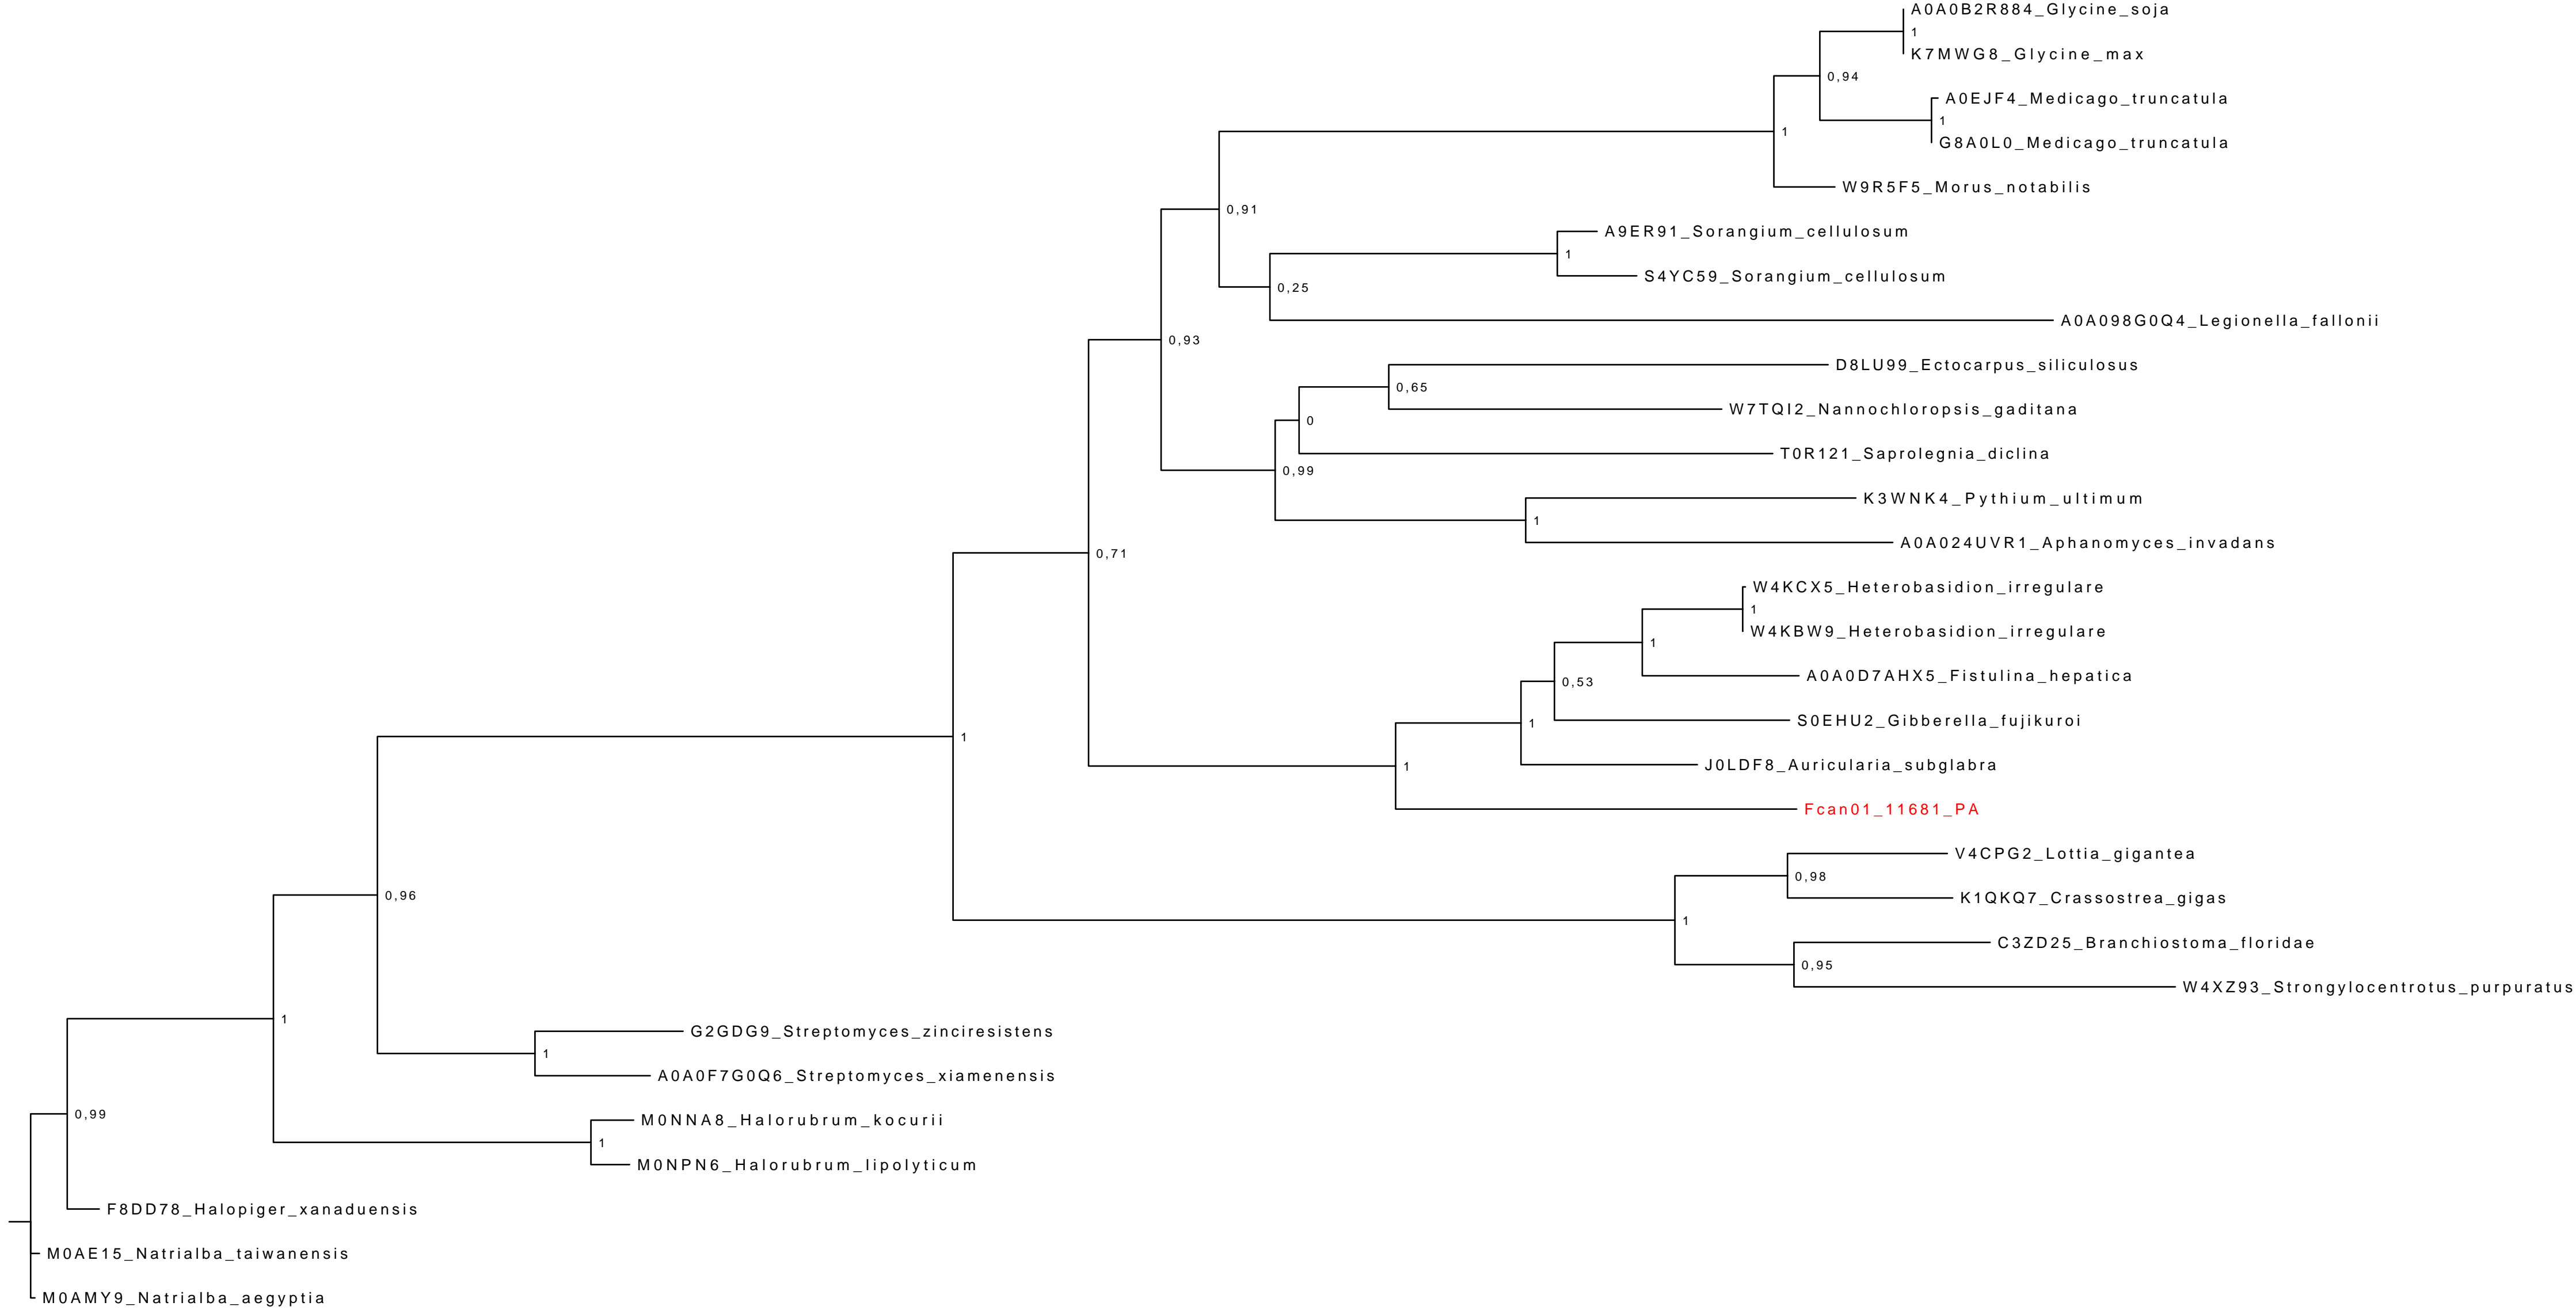

0.5

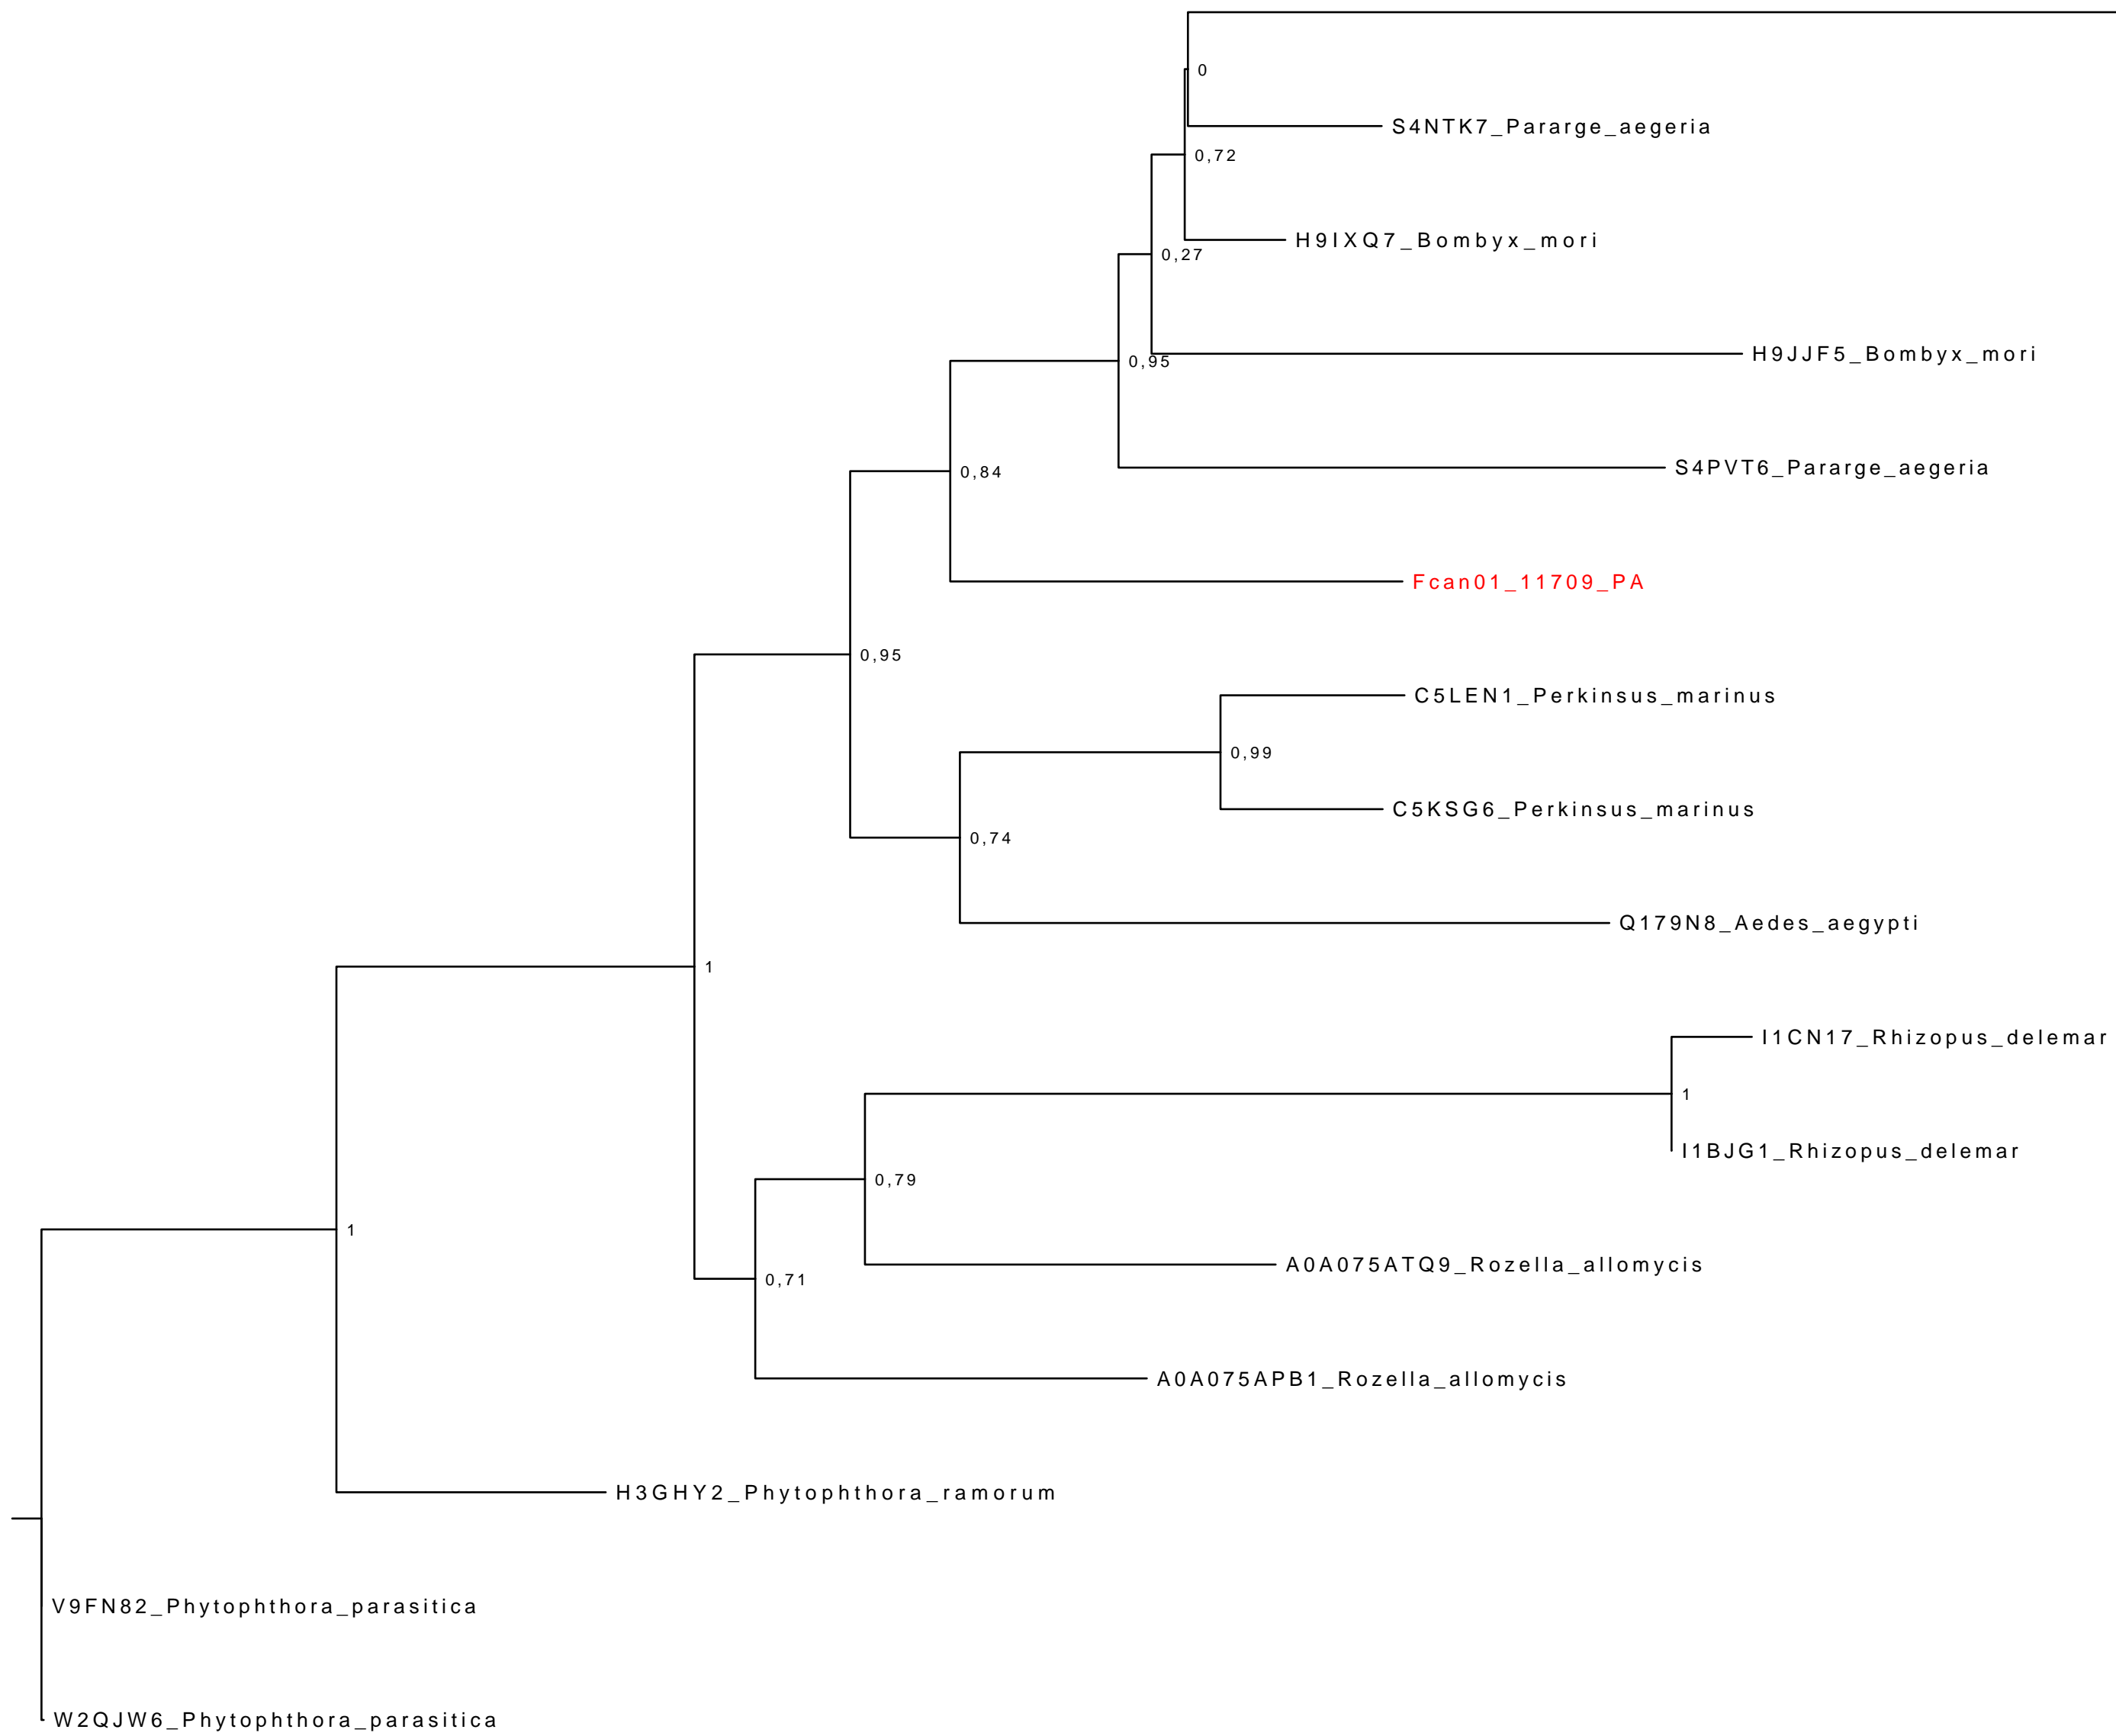

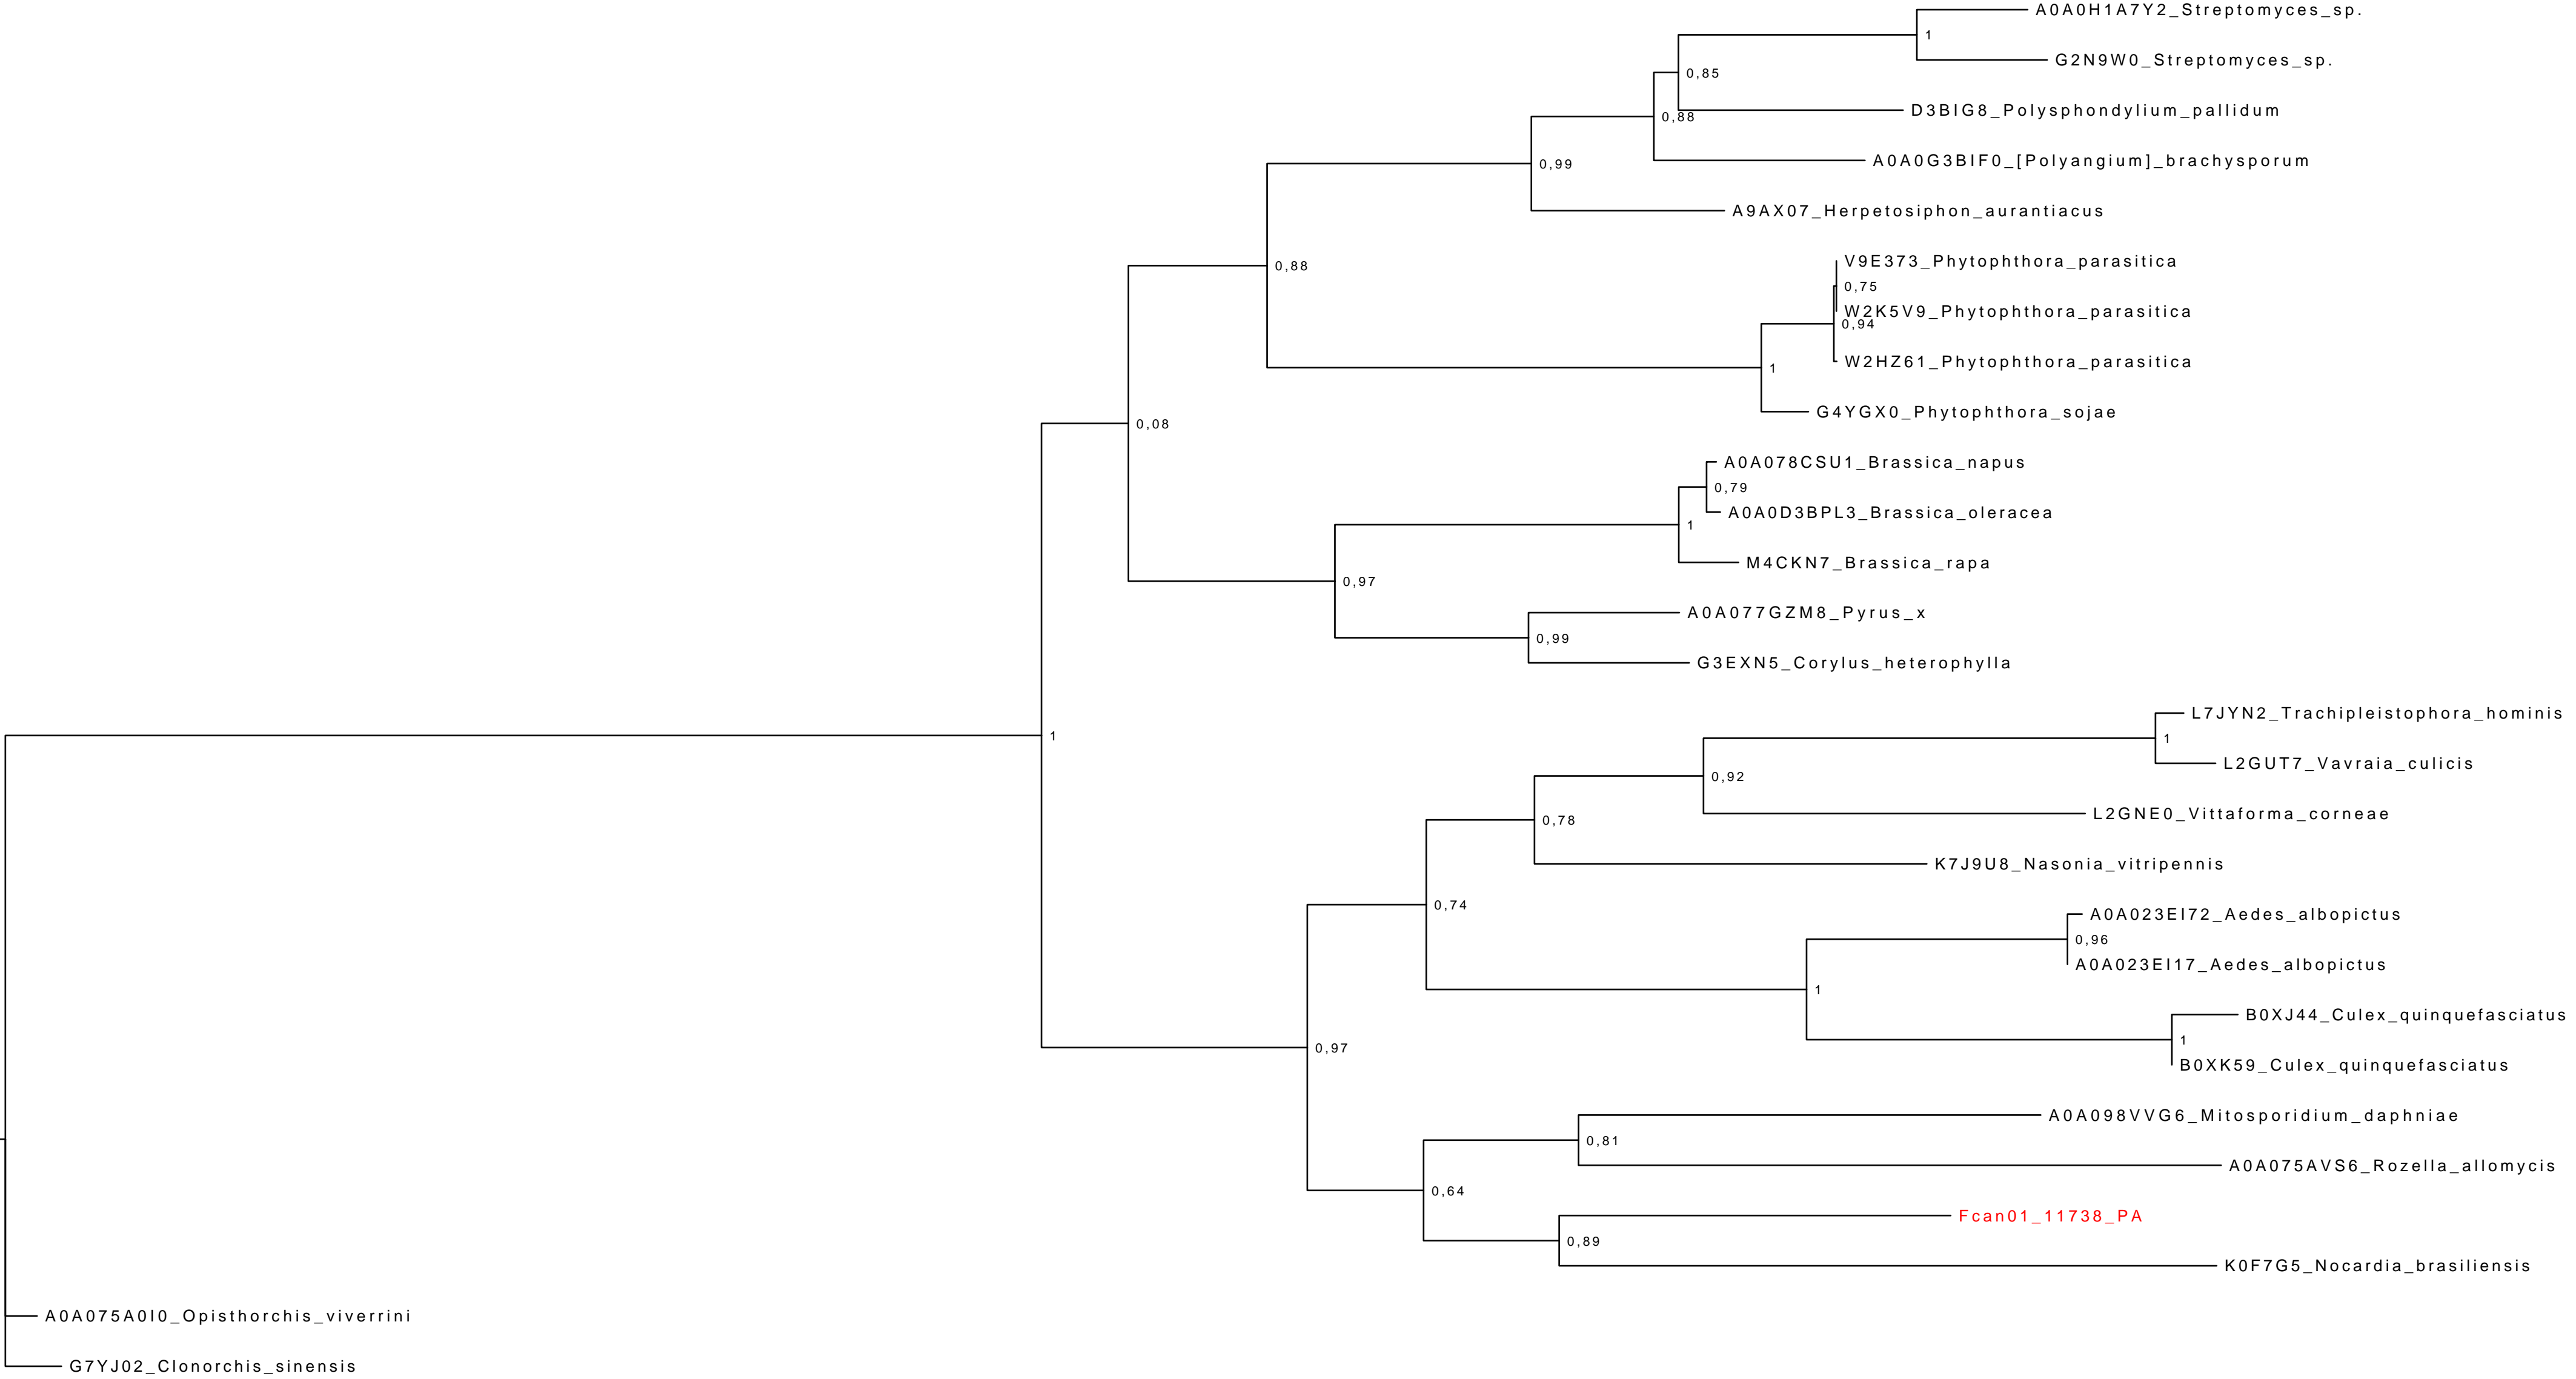

0.4



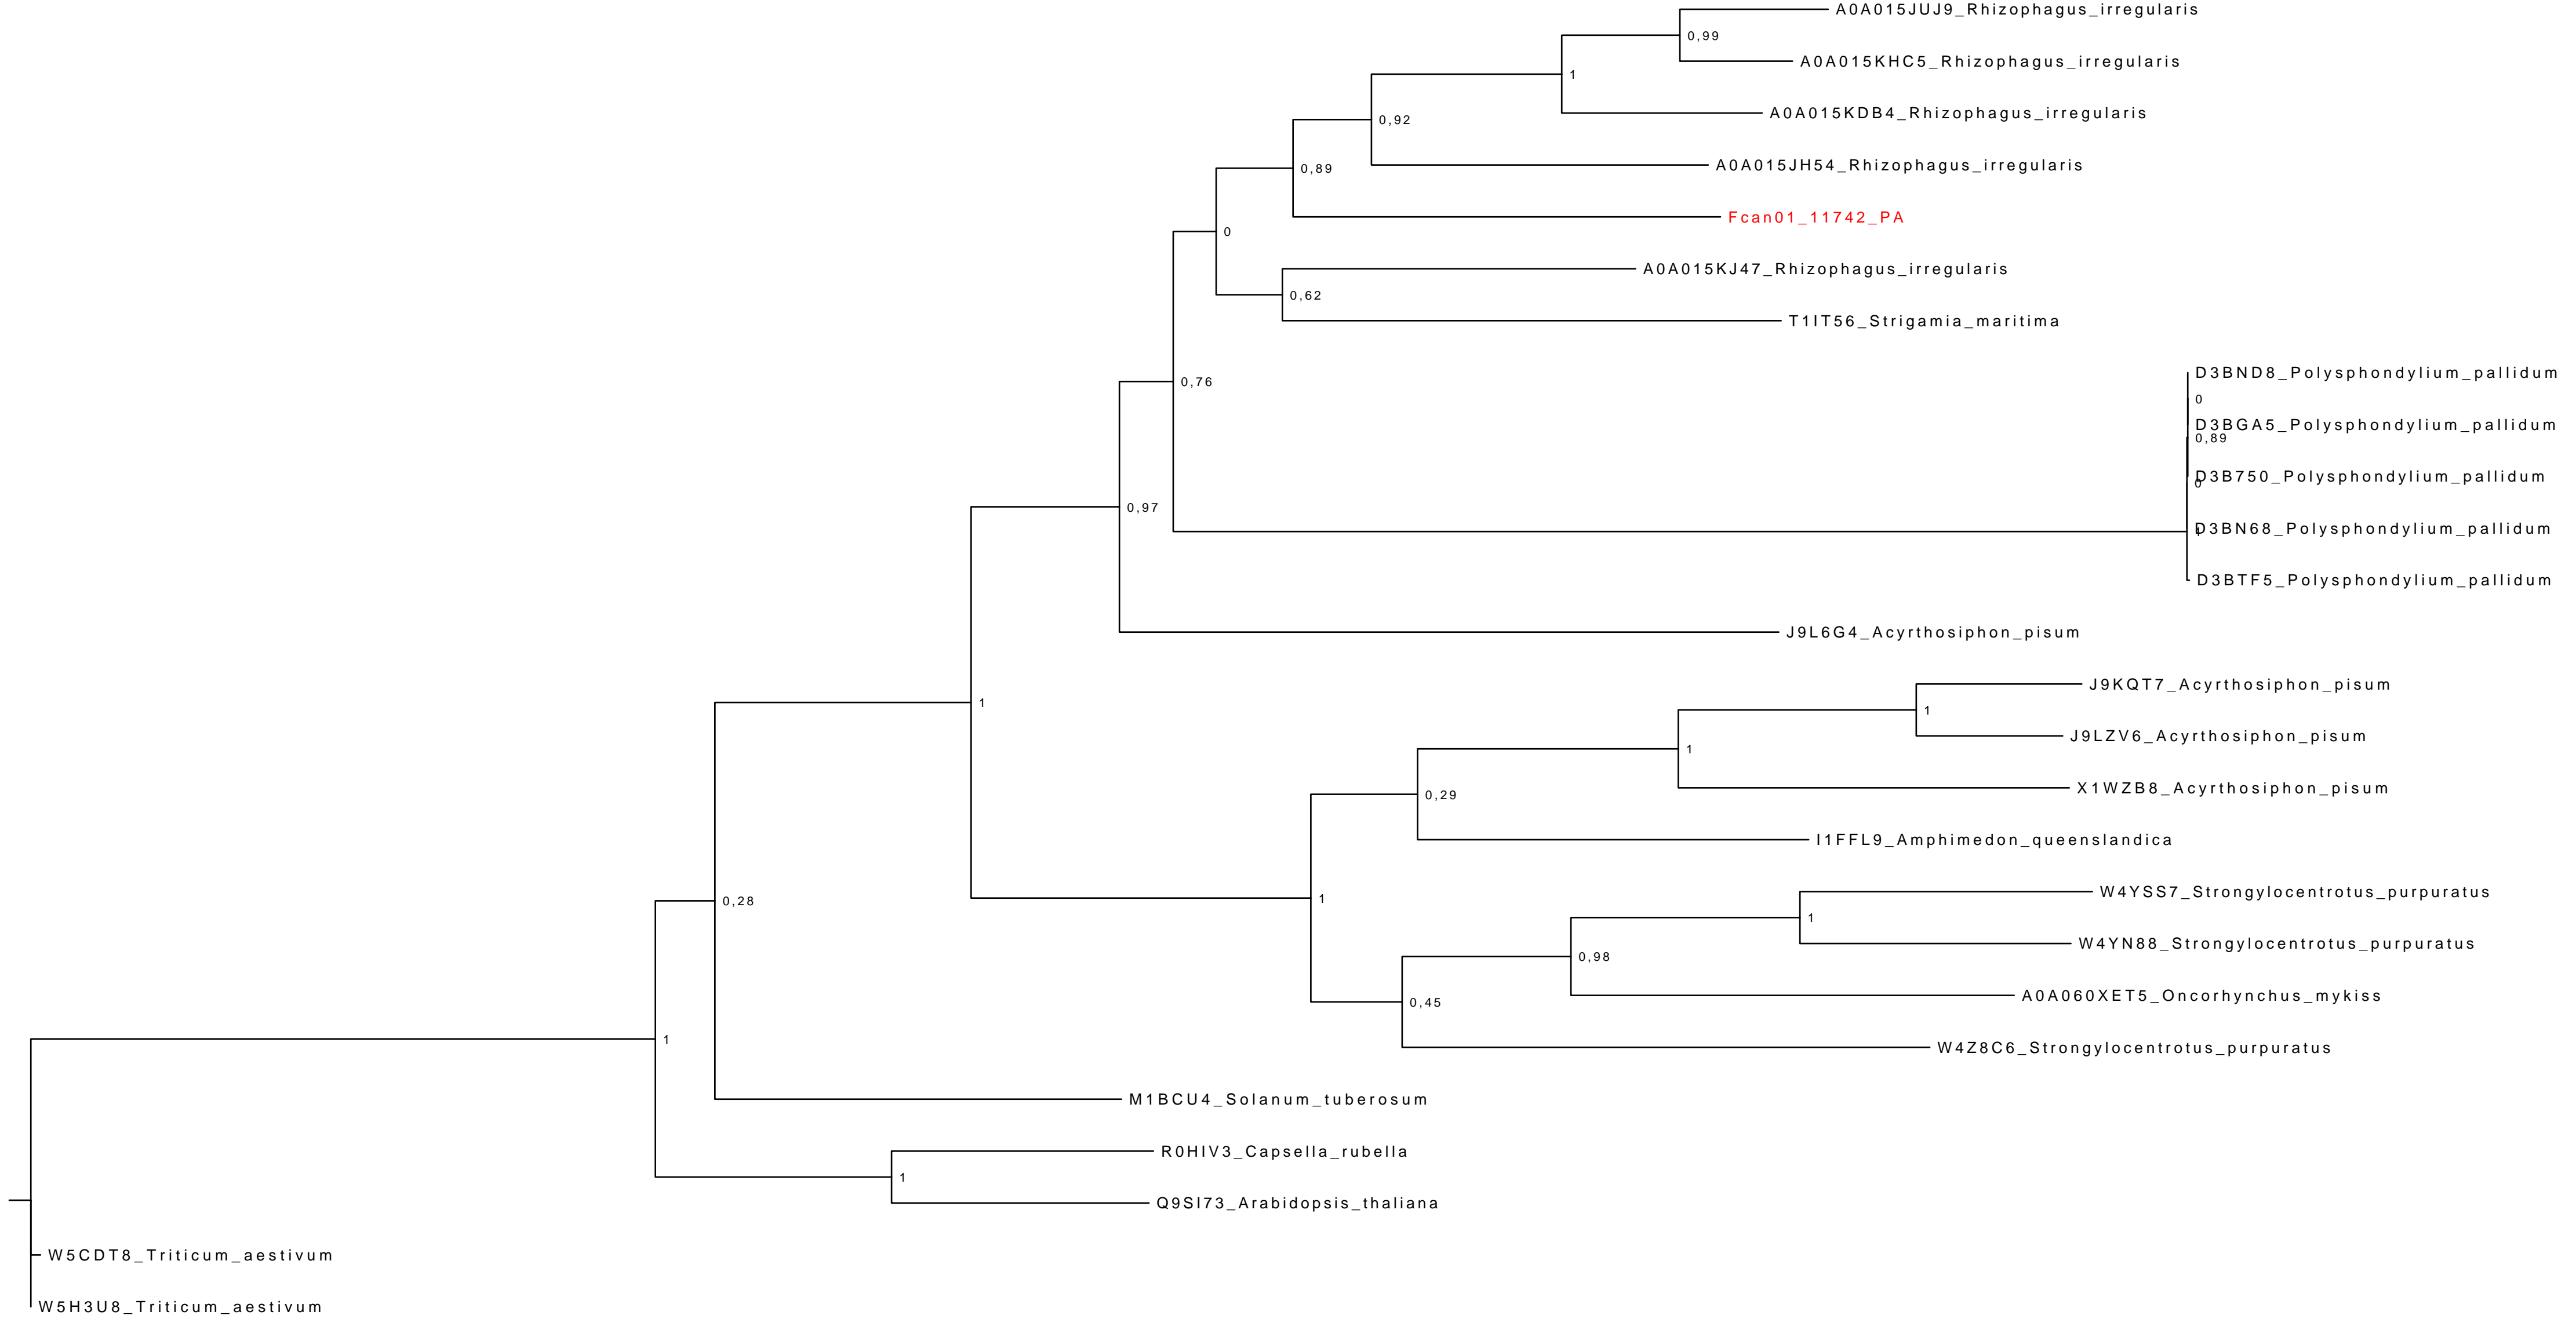

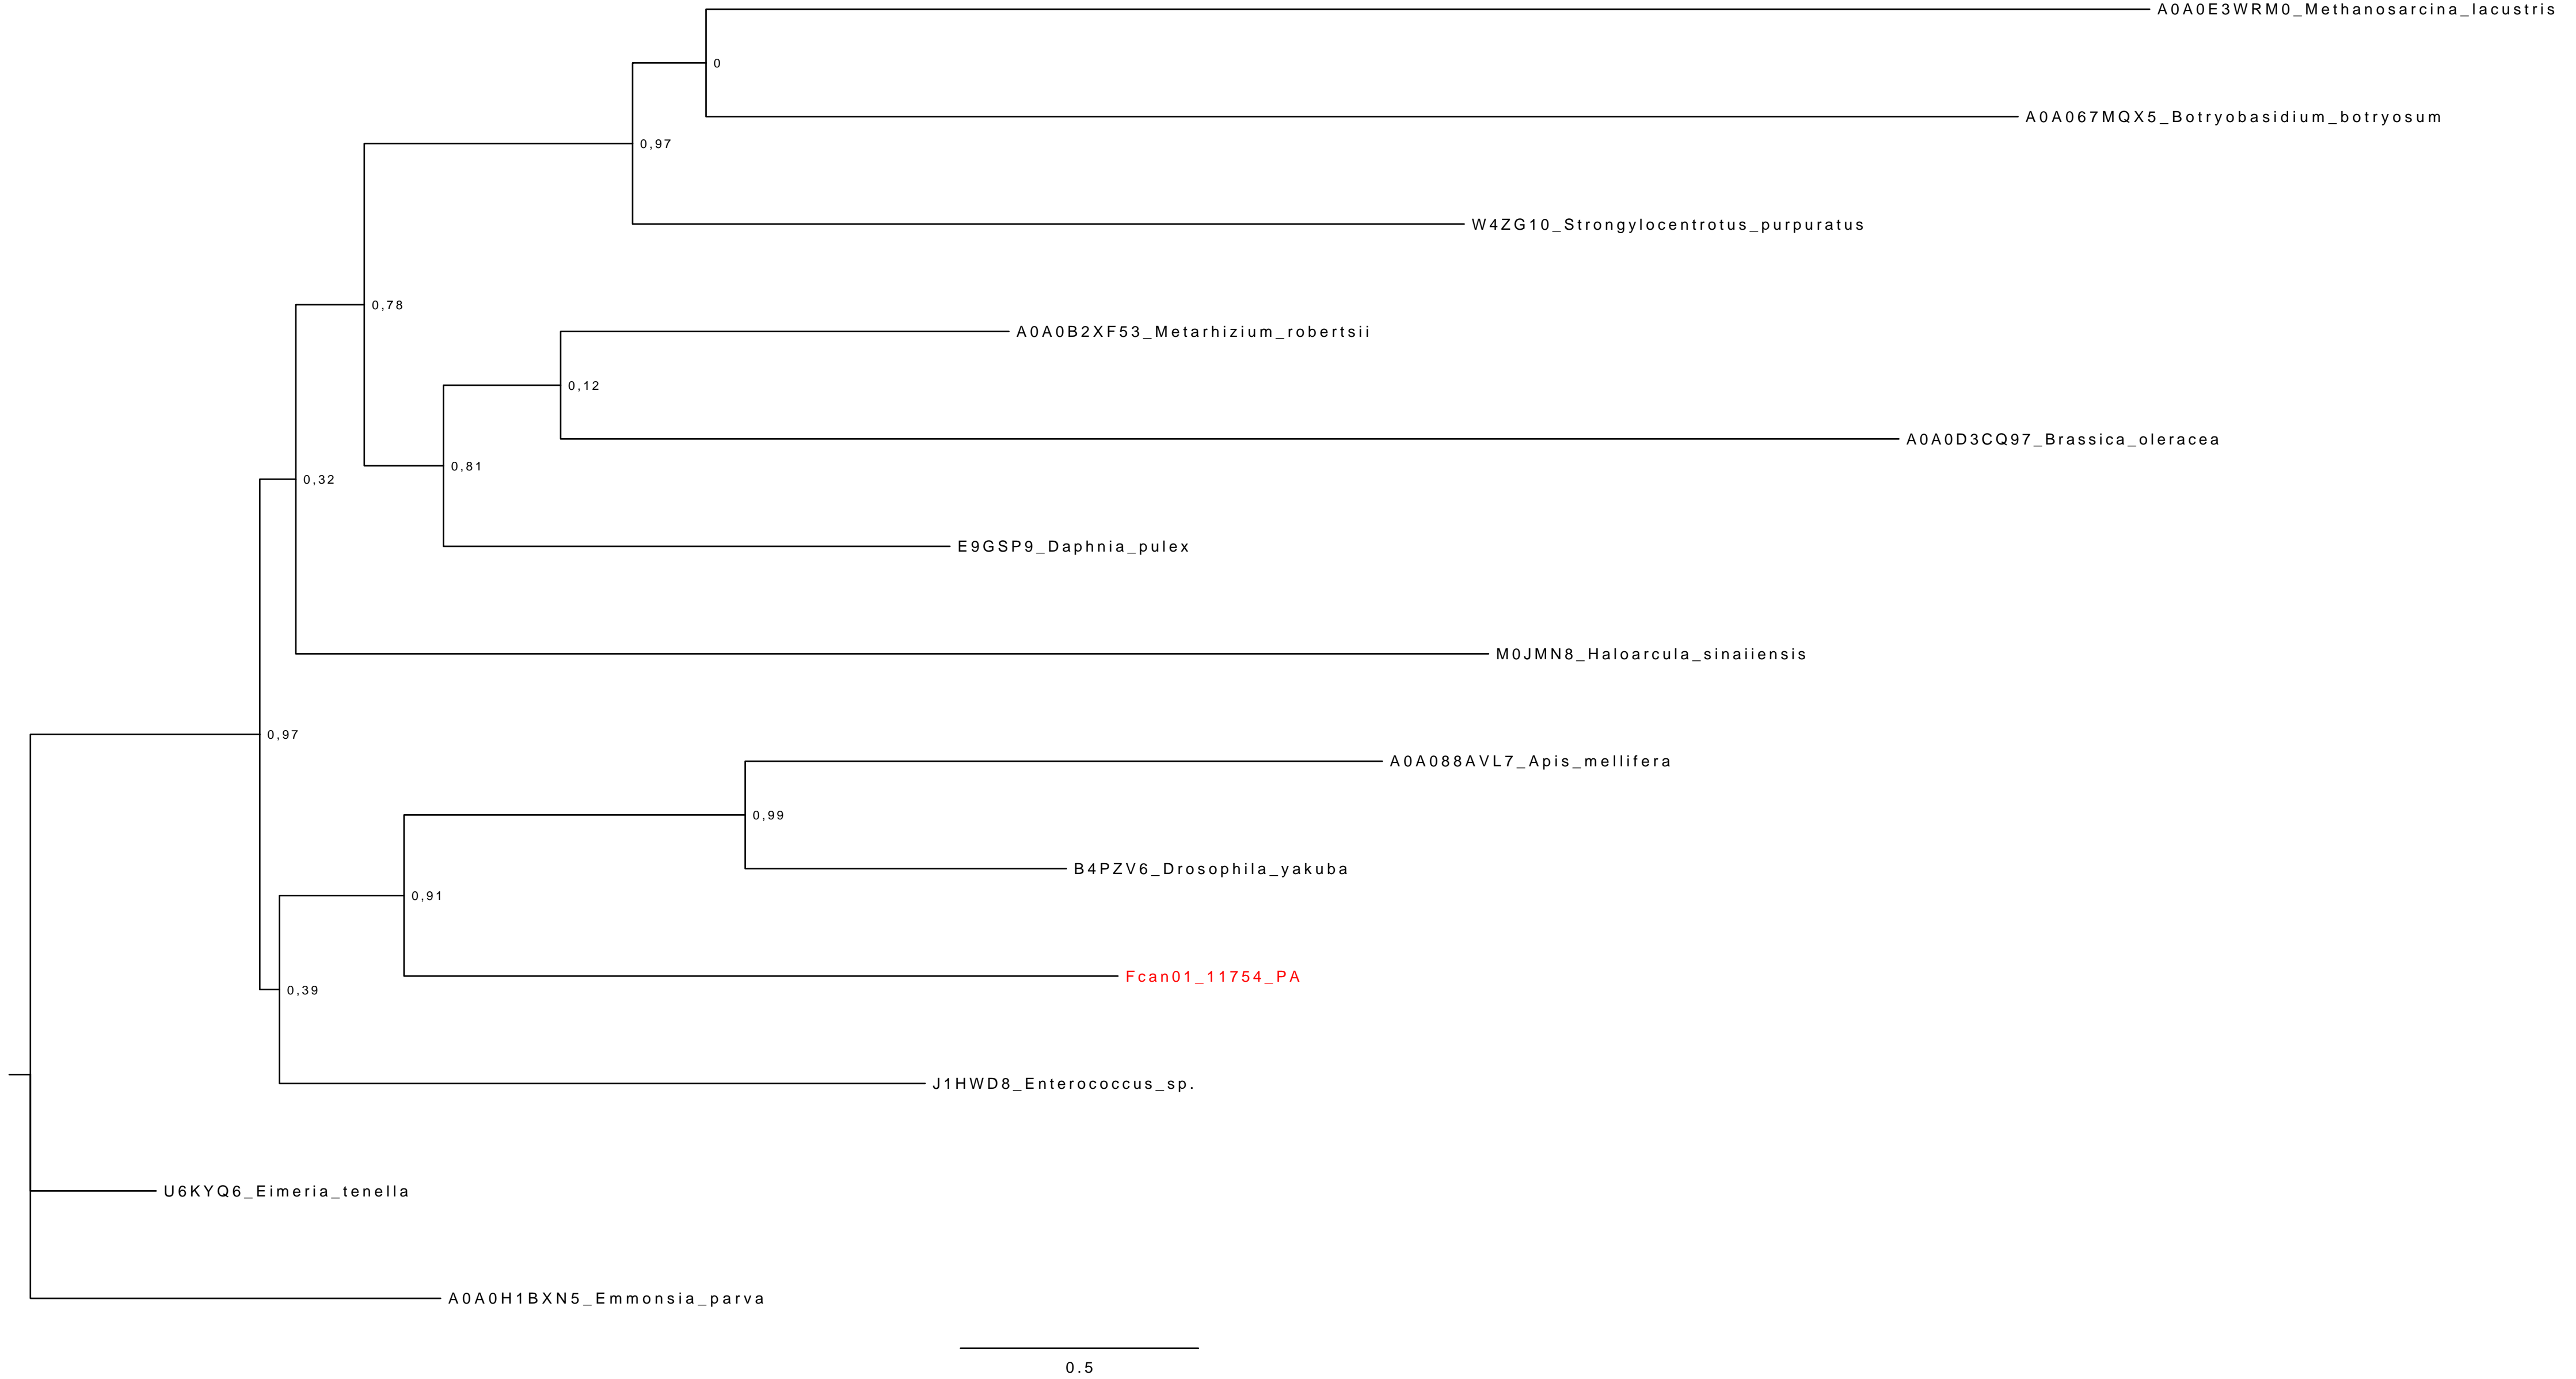

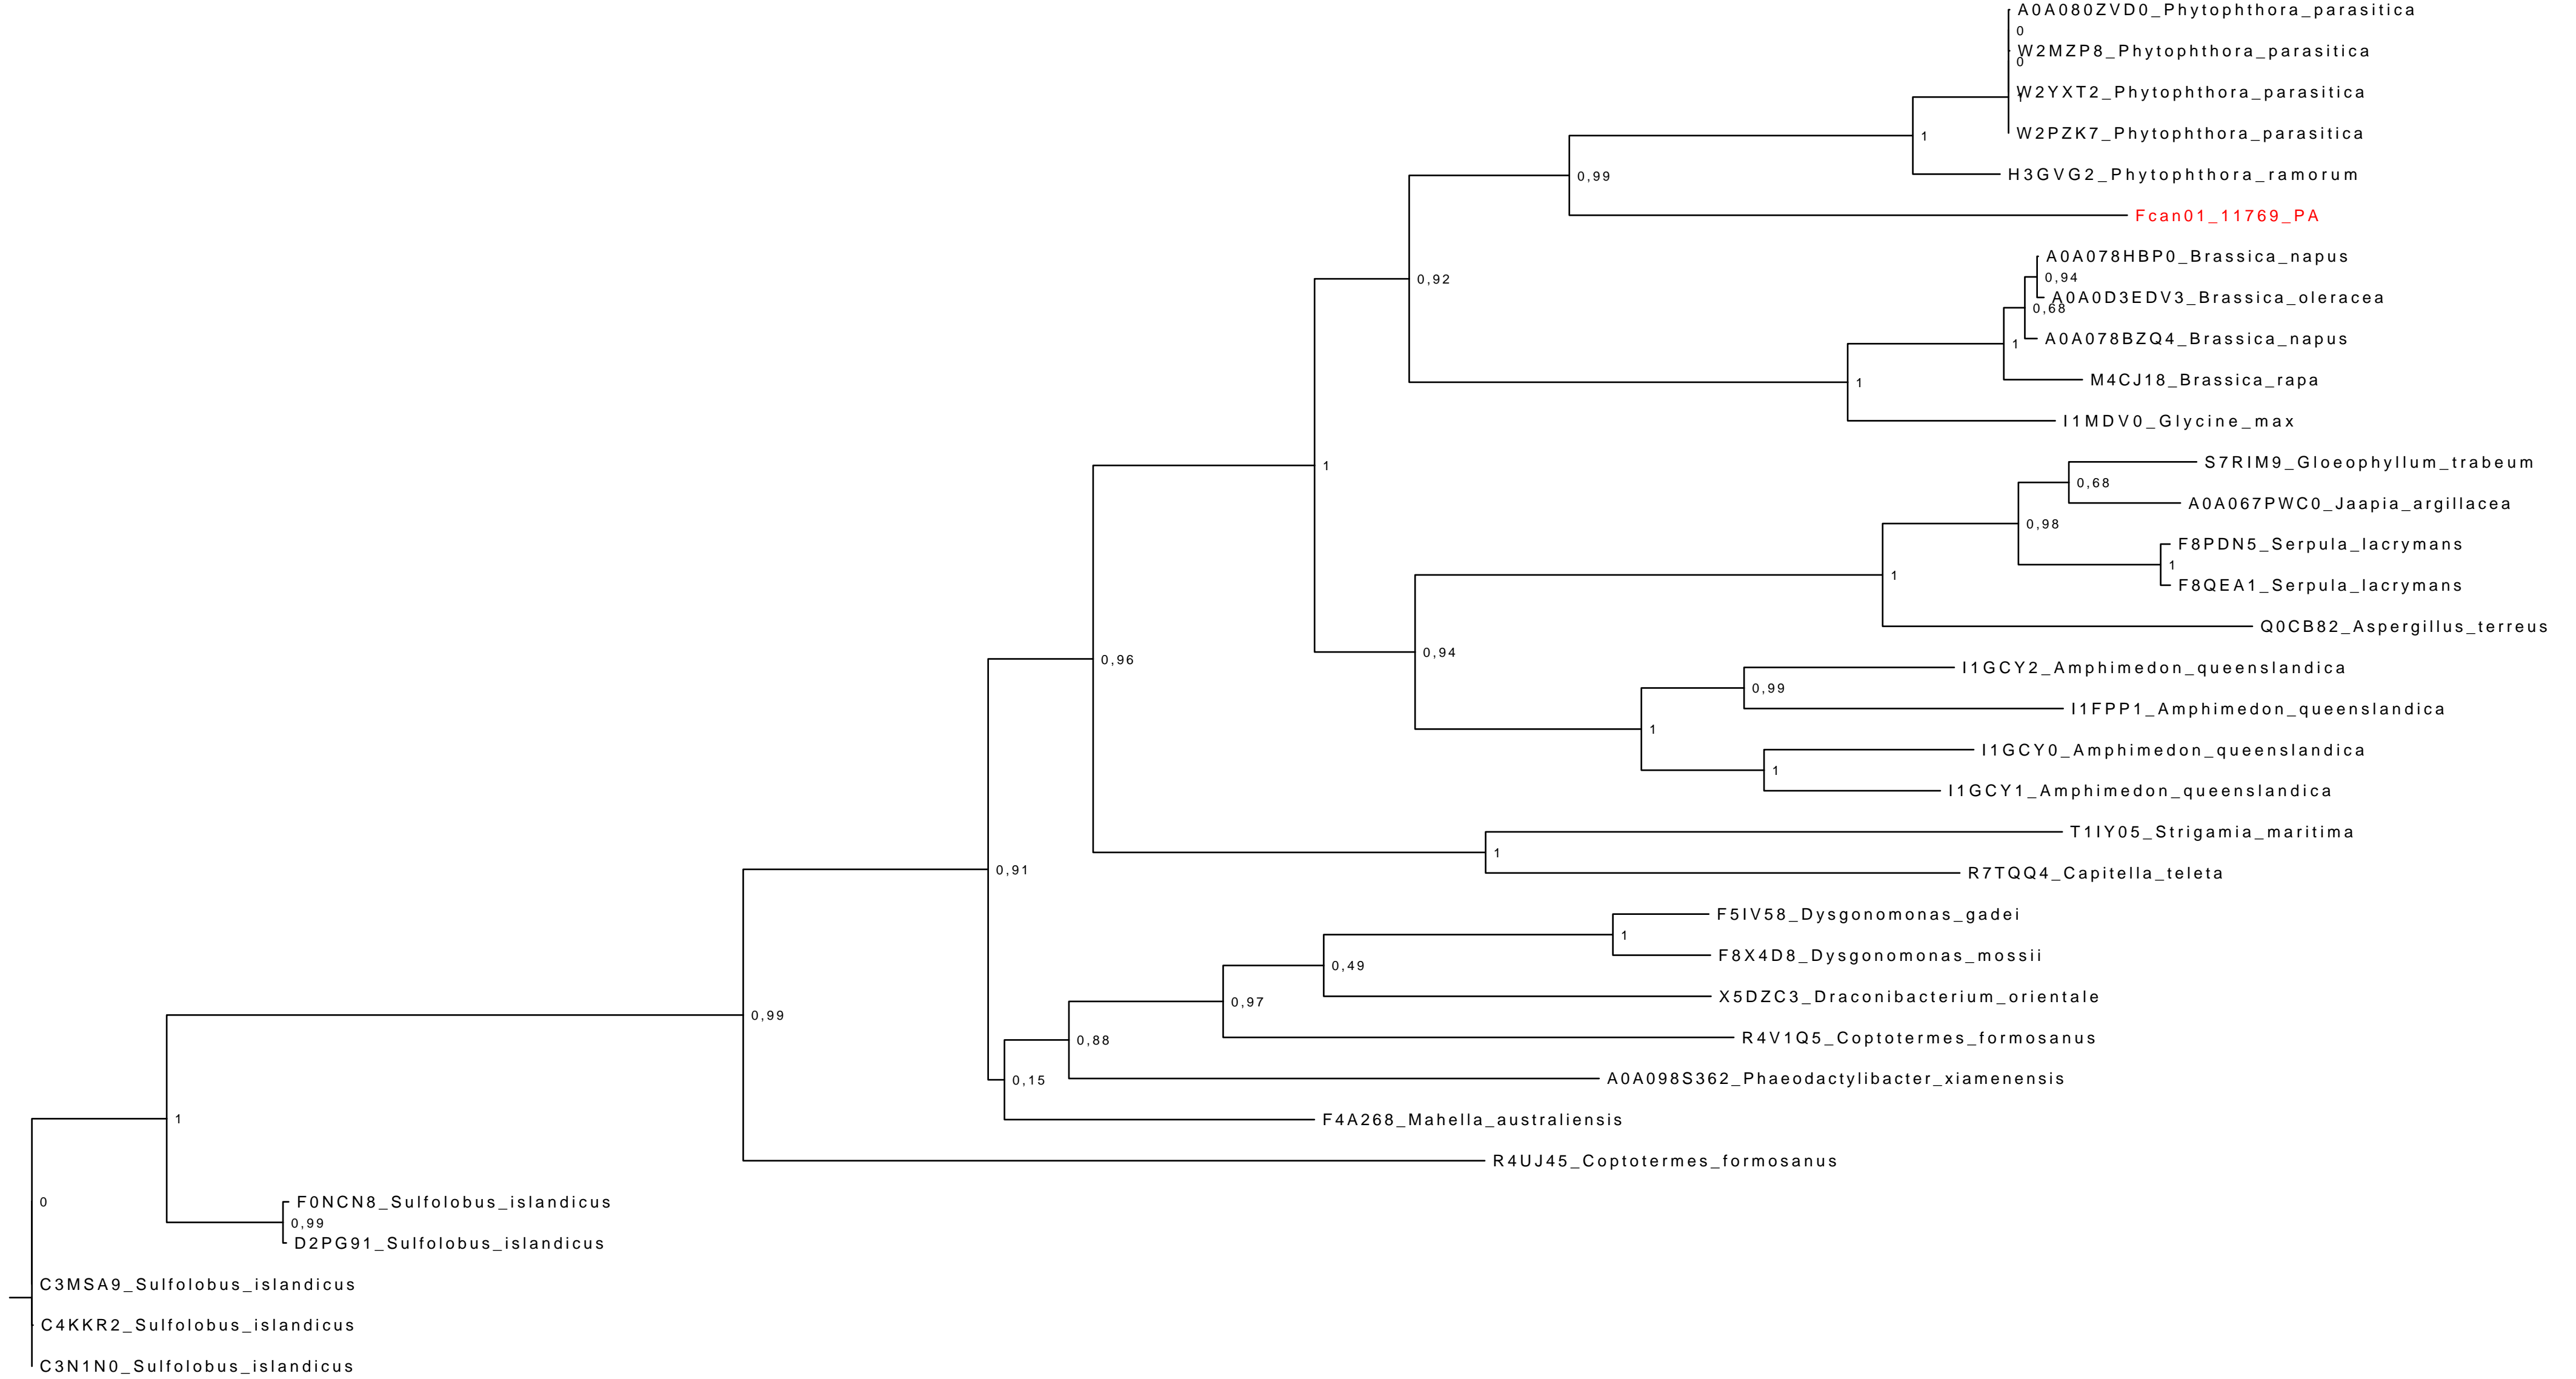

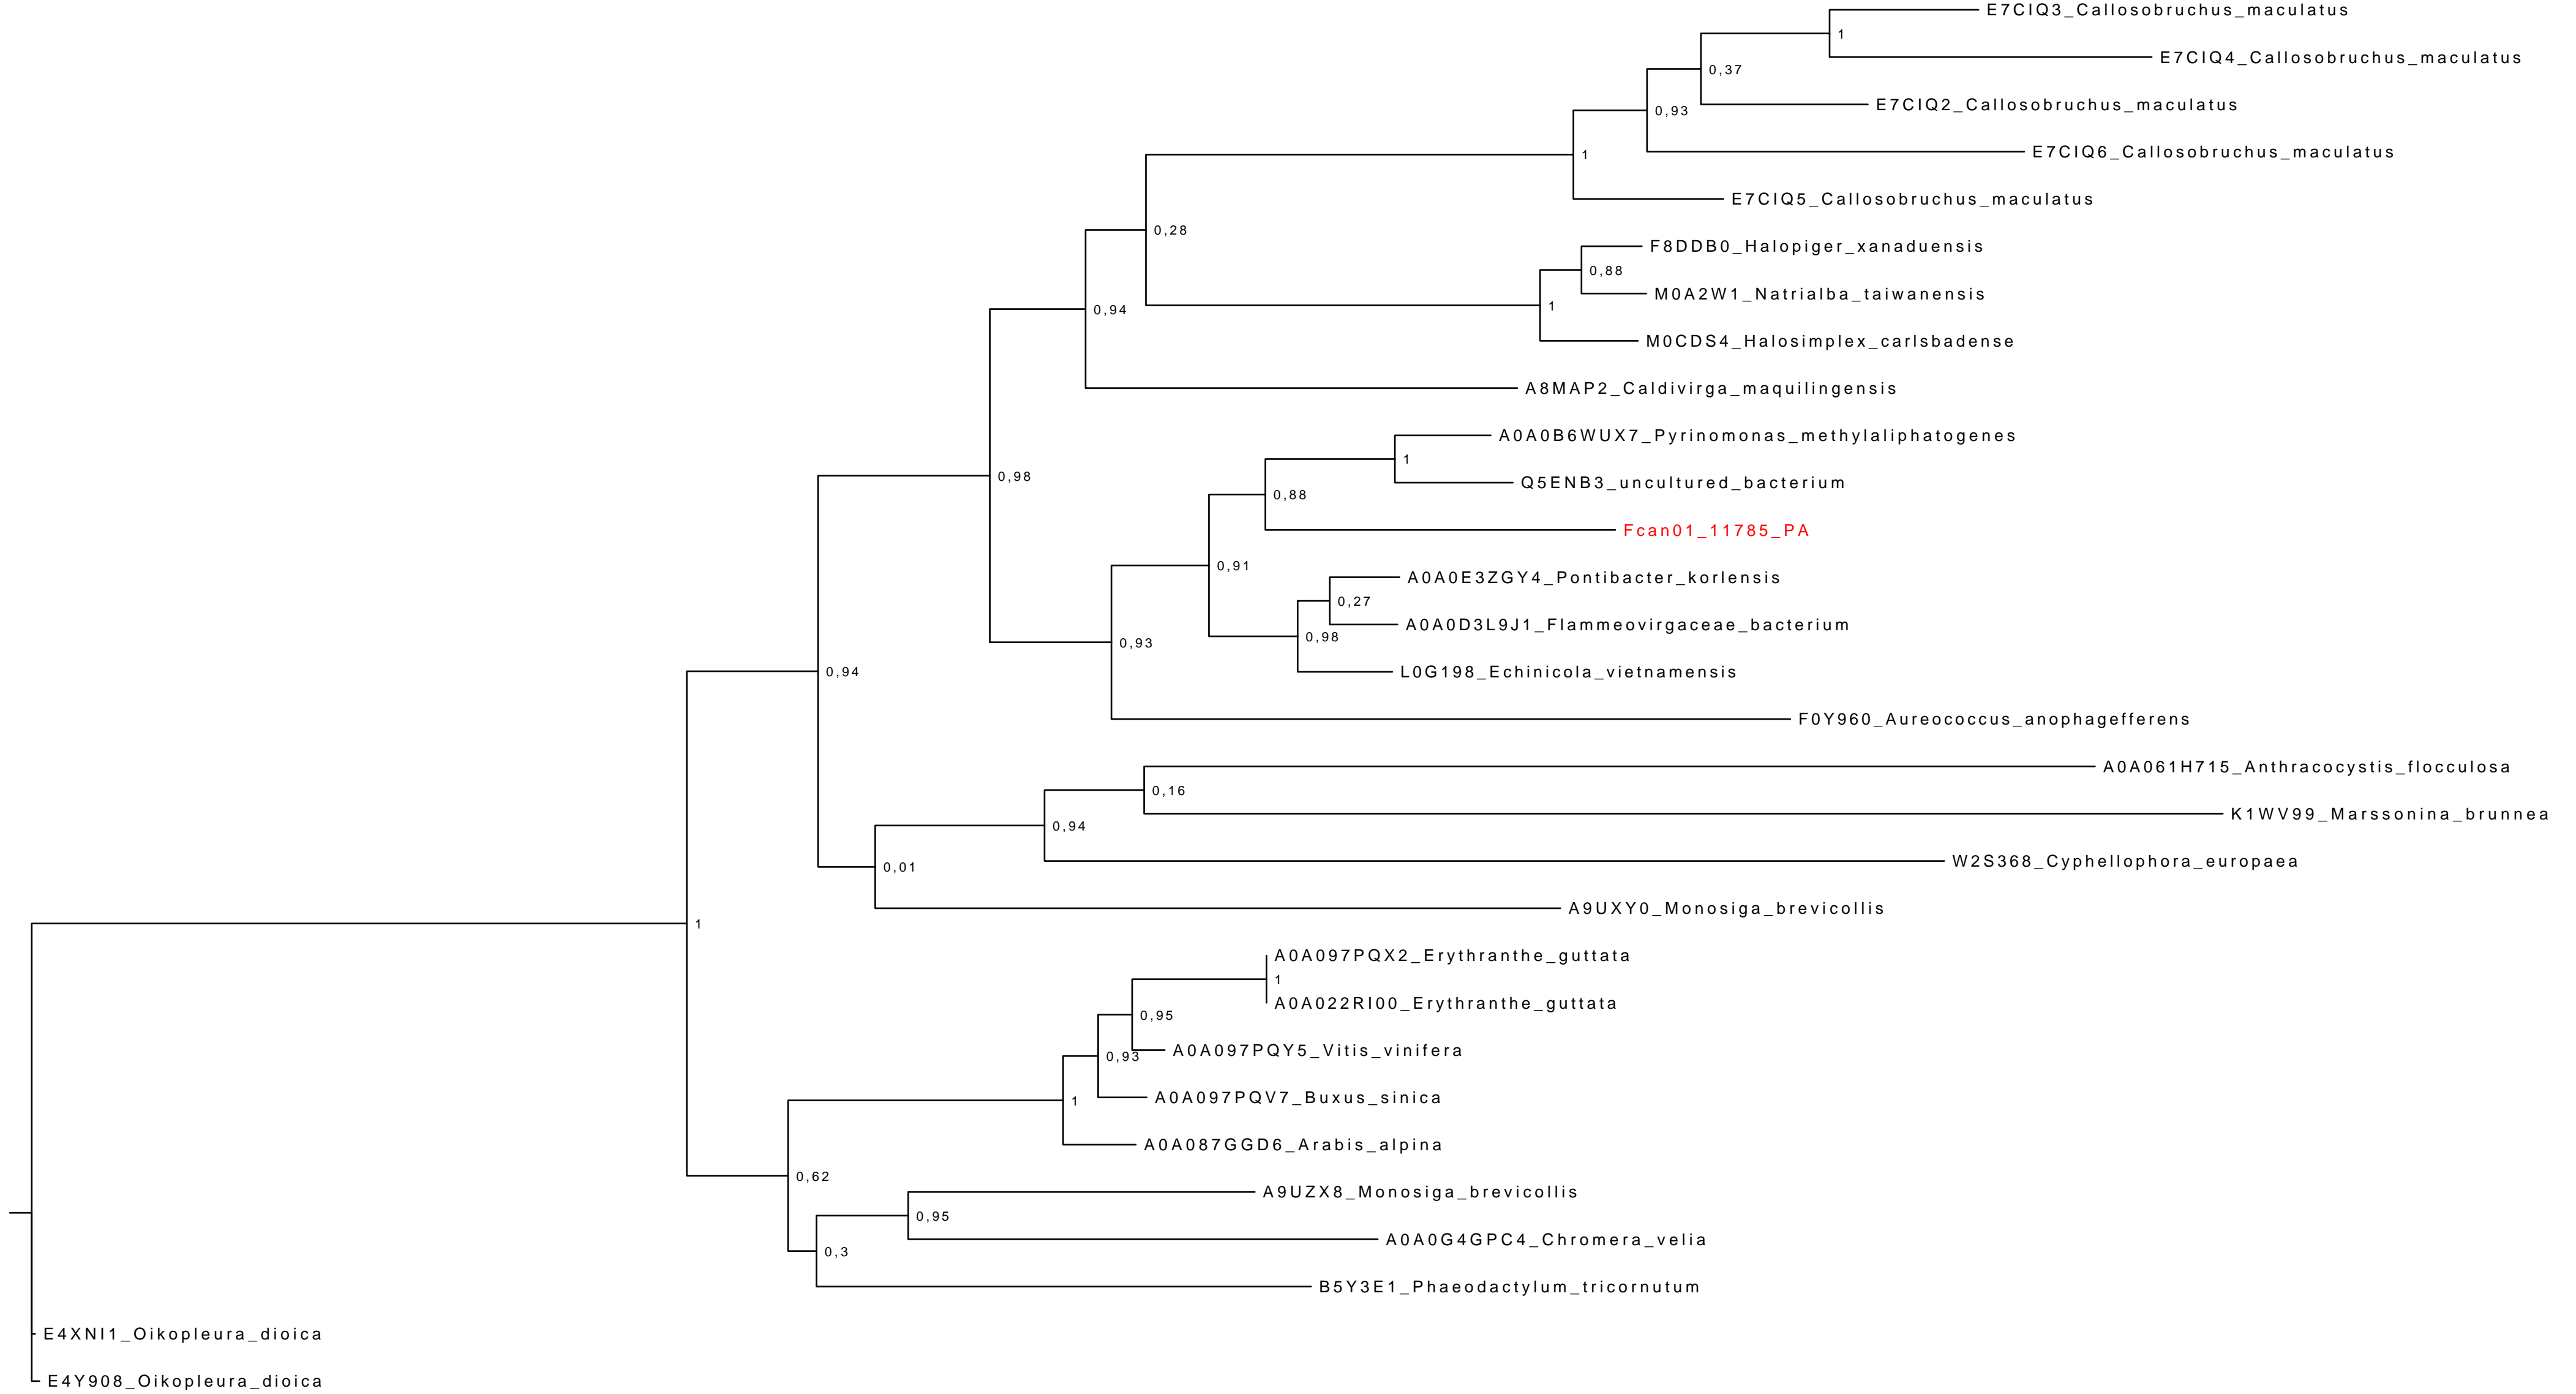

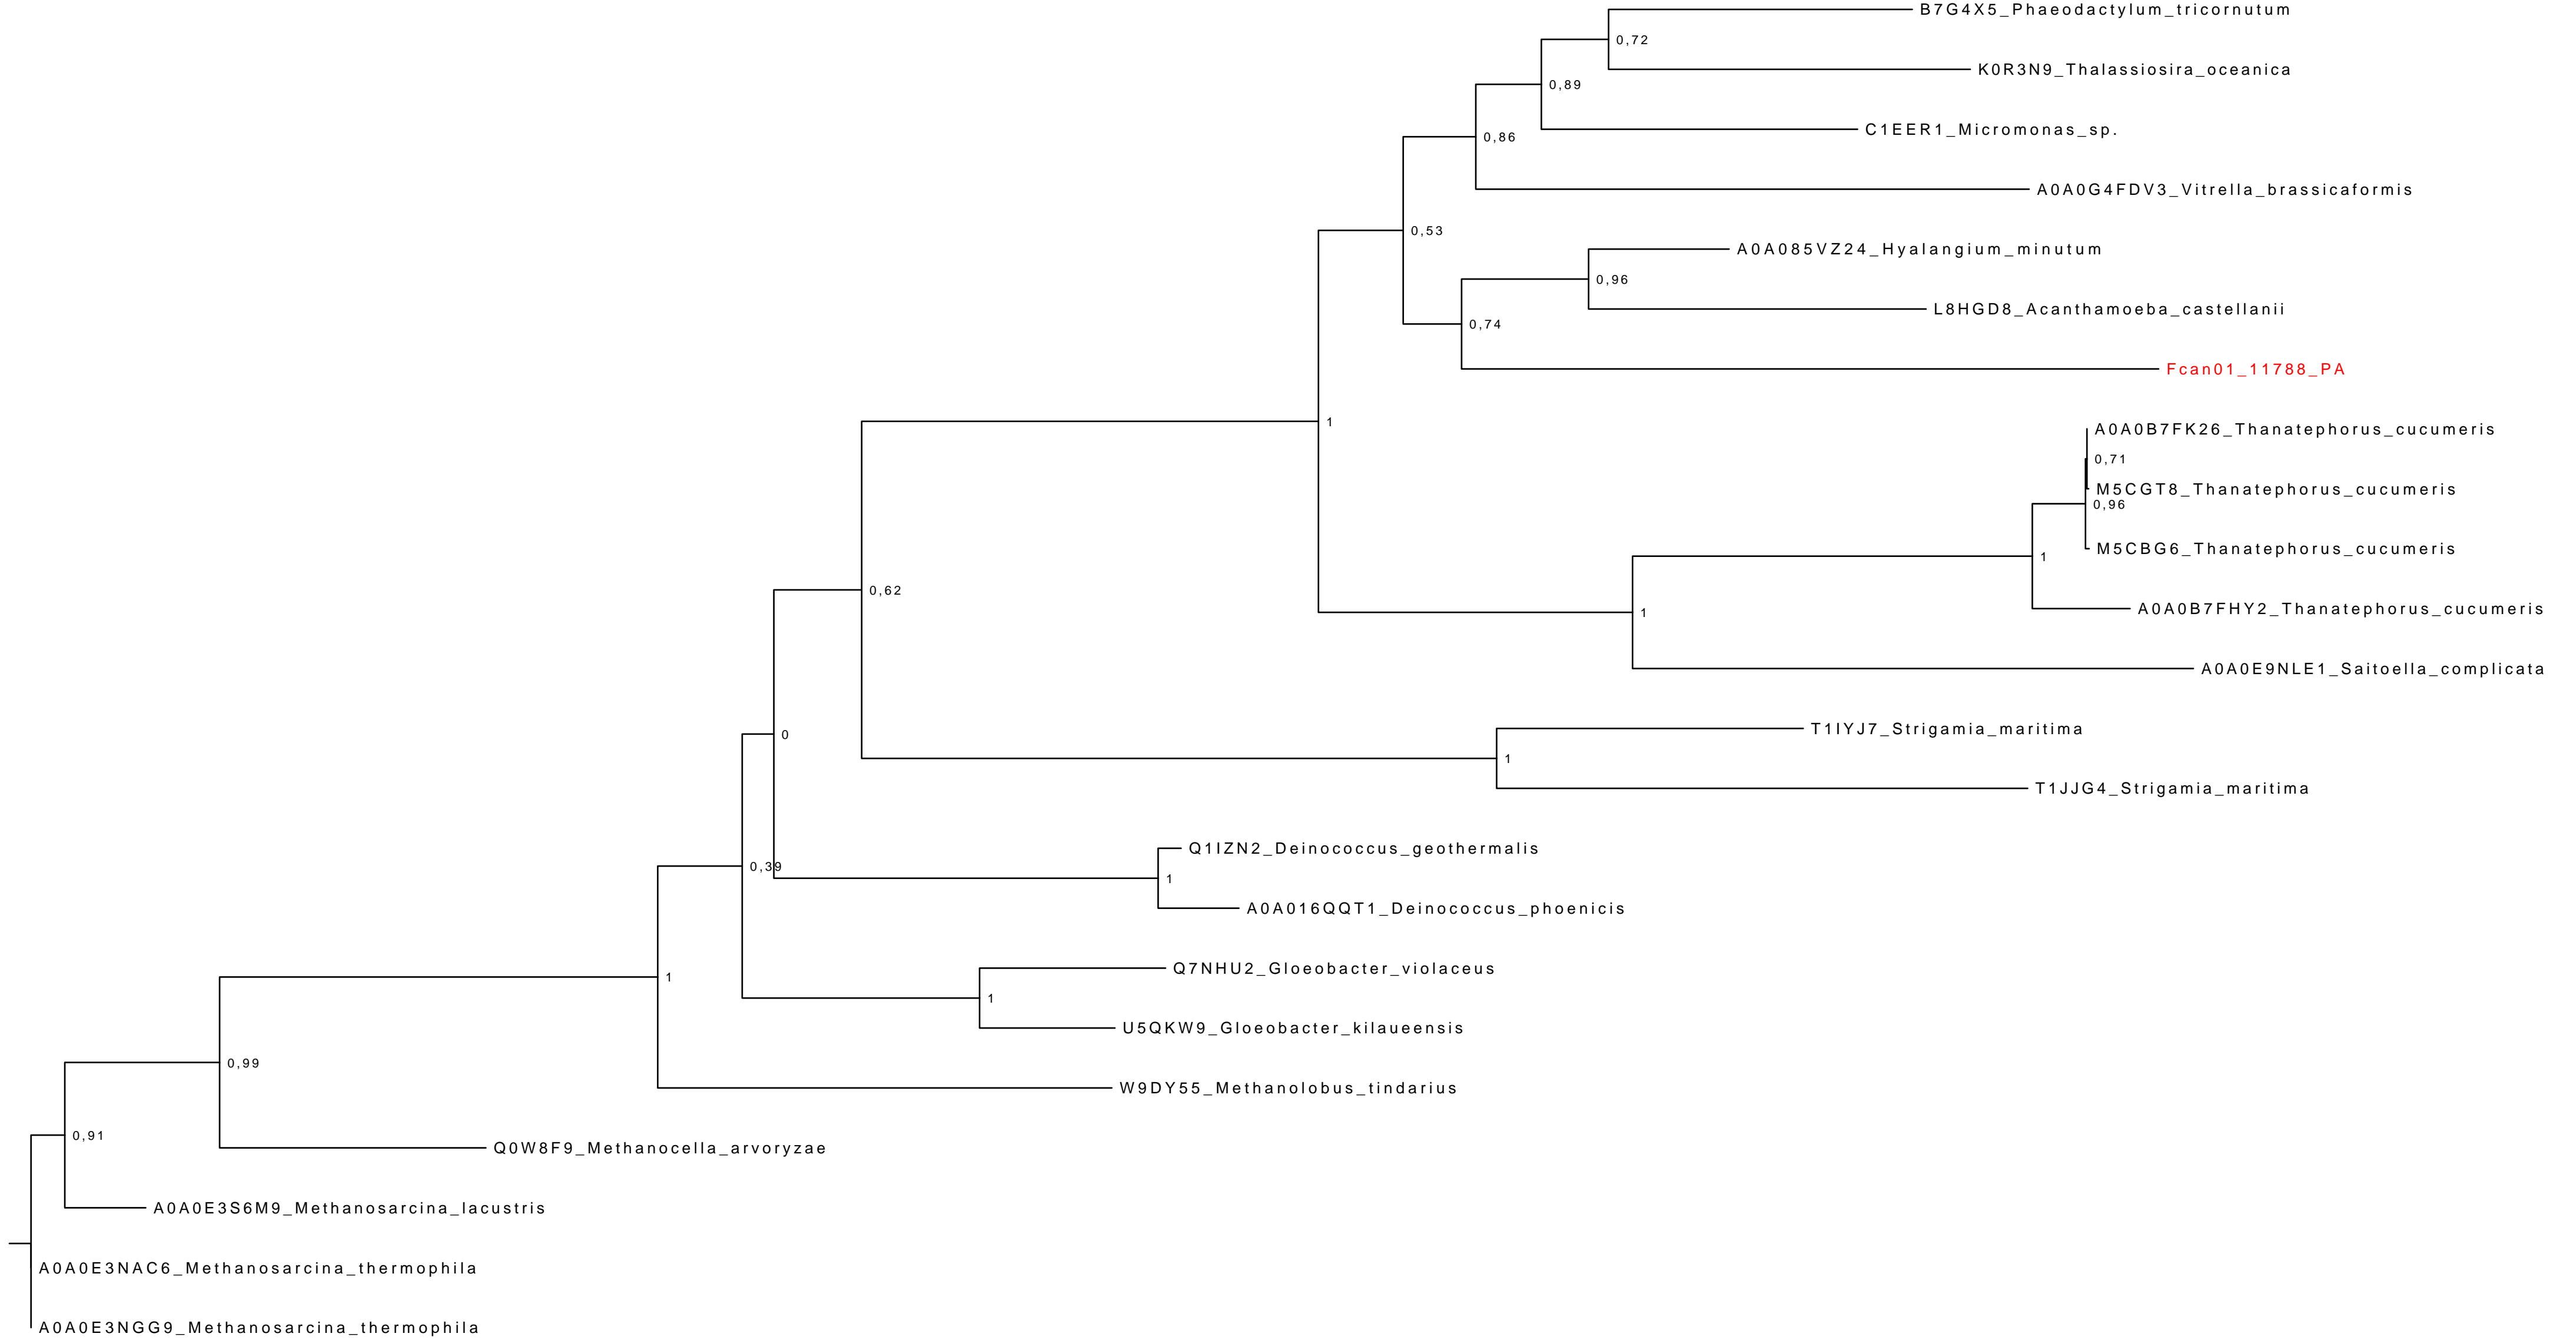

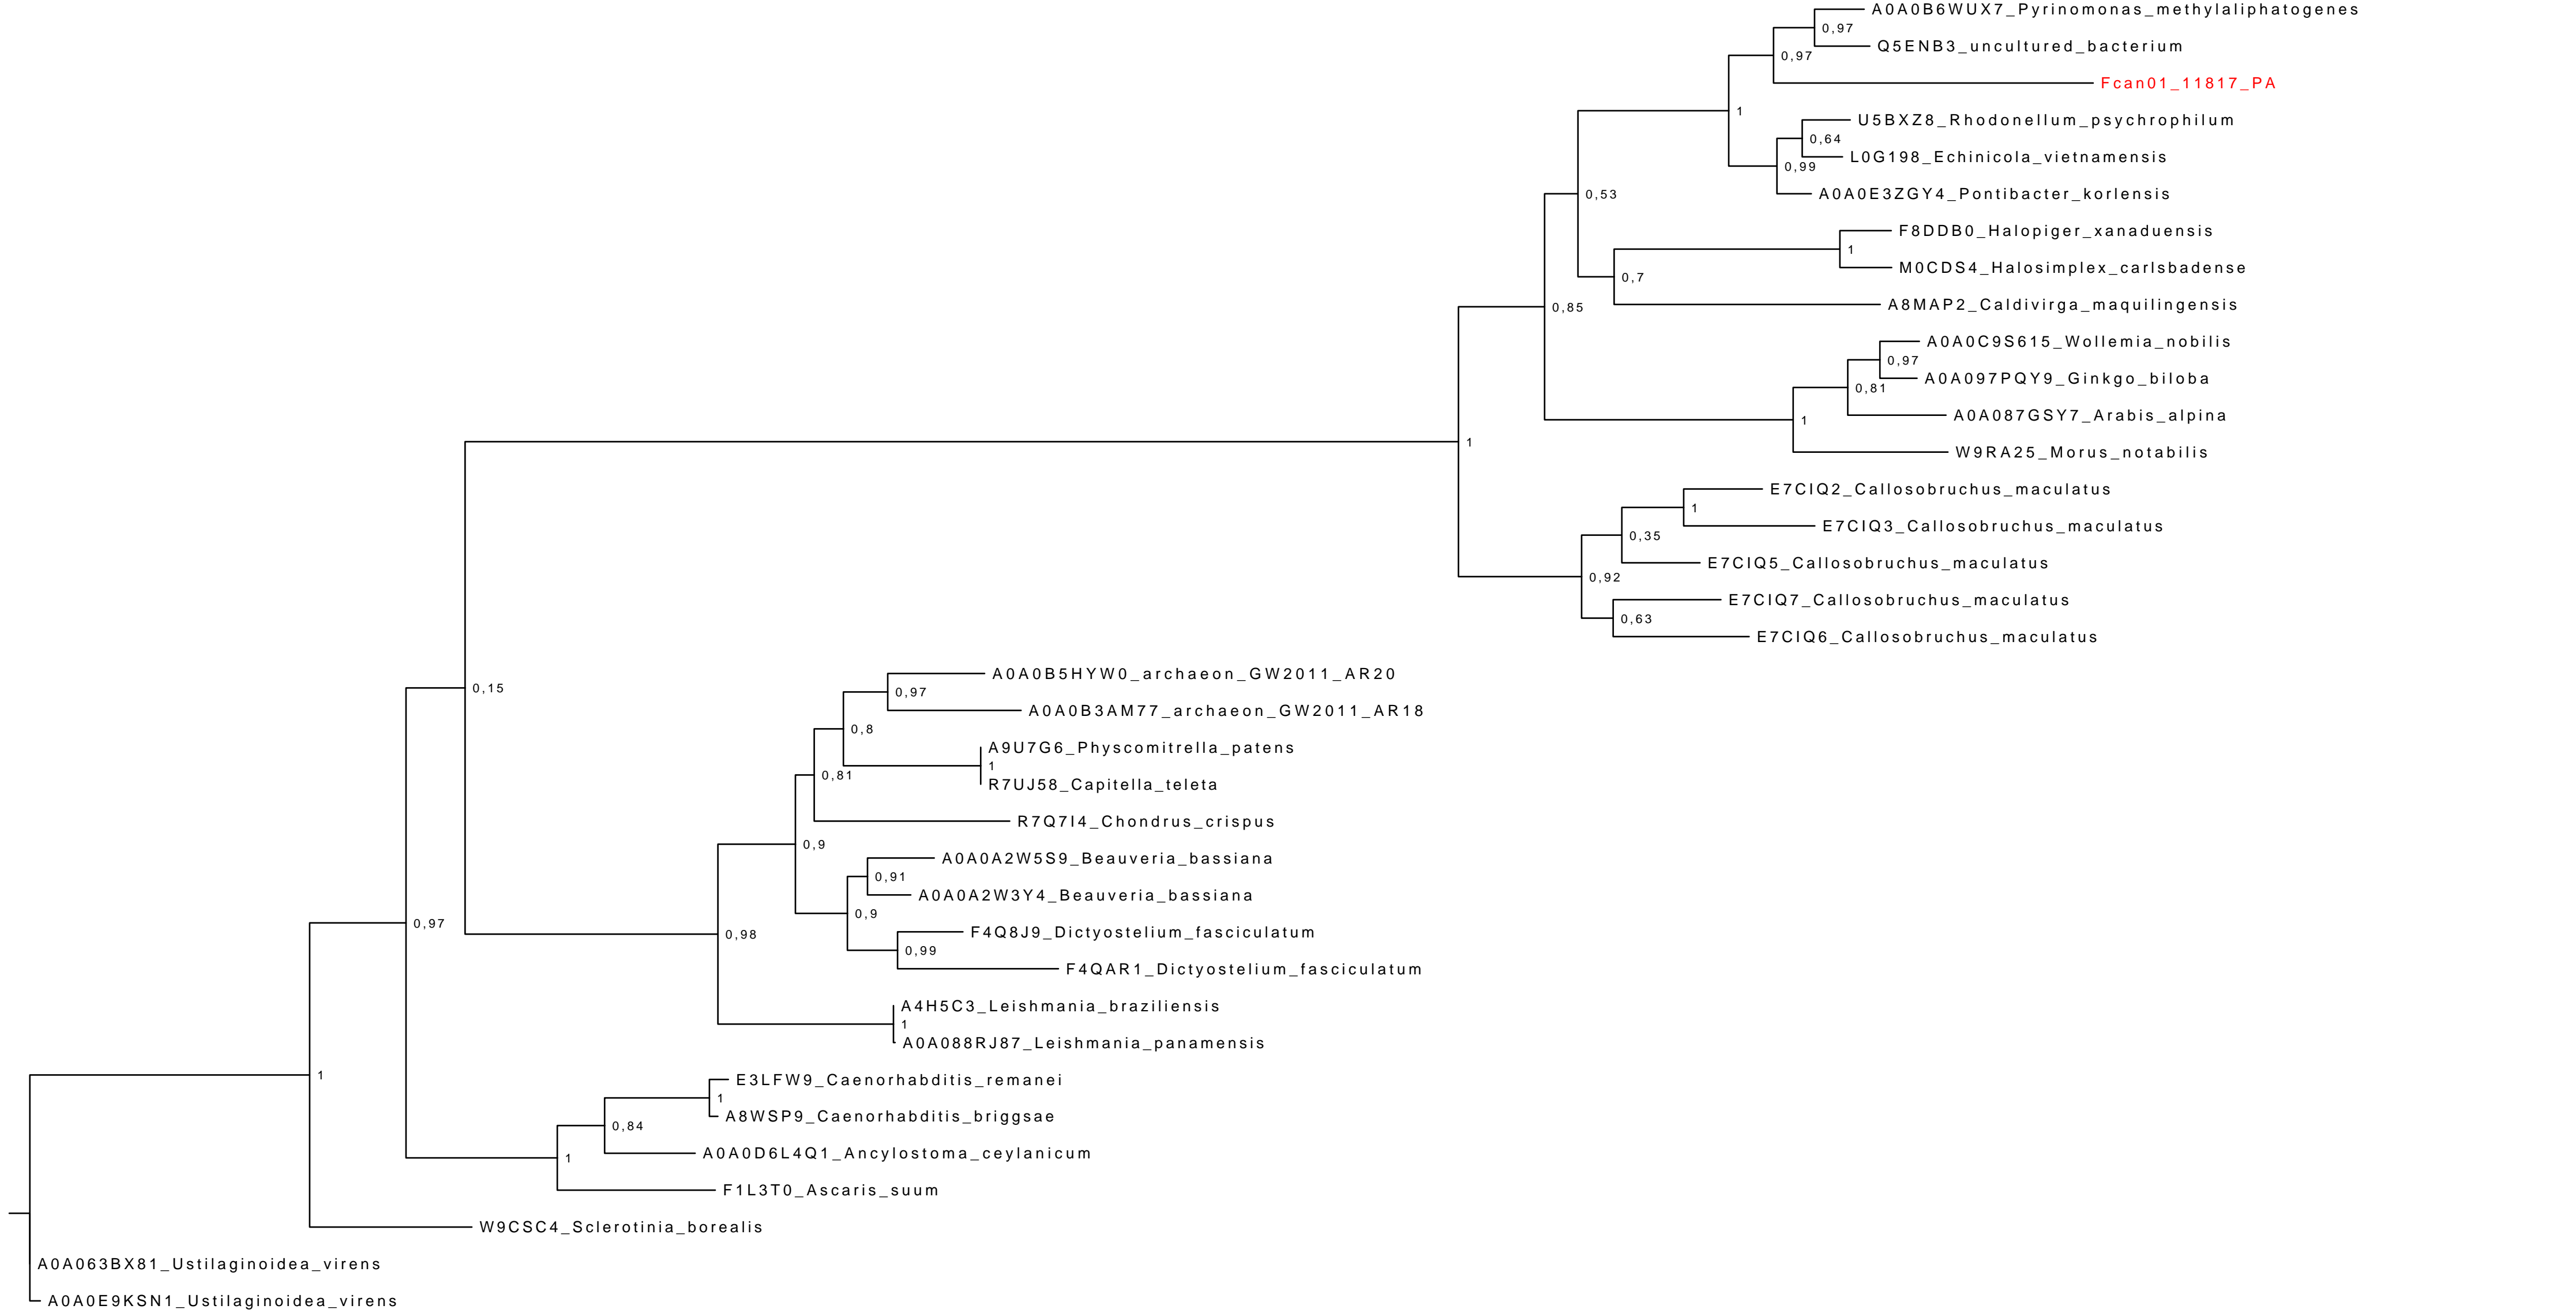

0.7

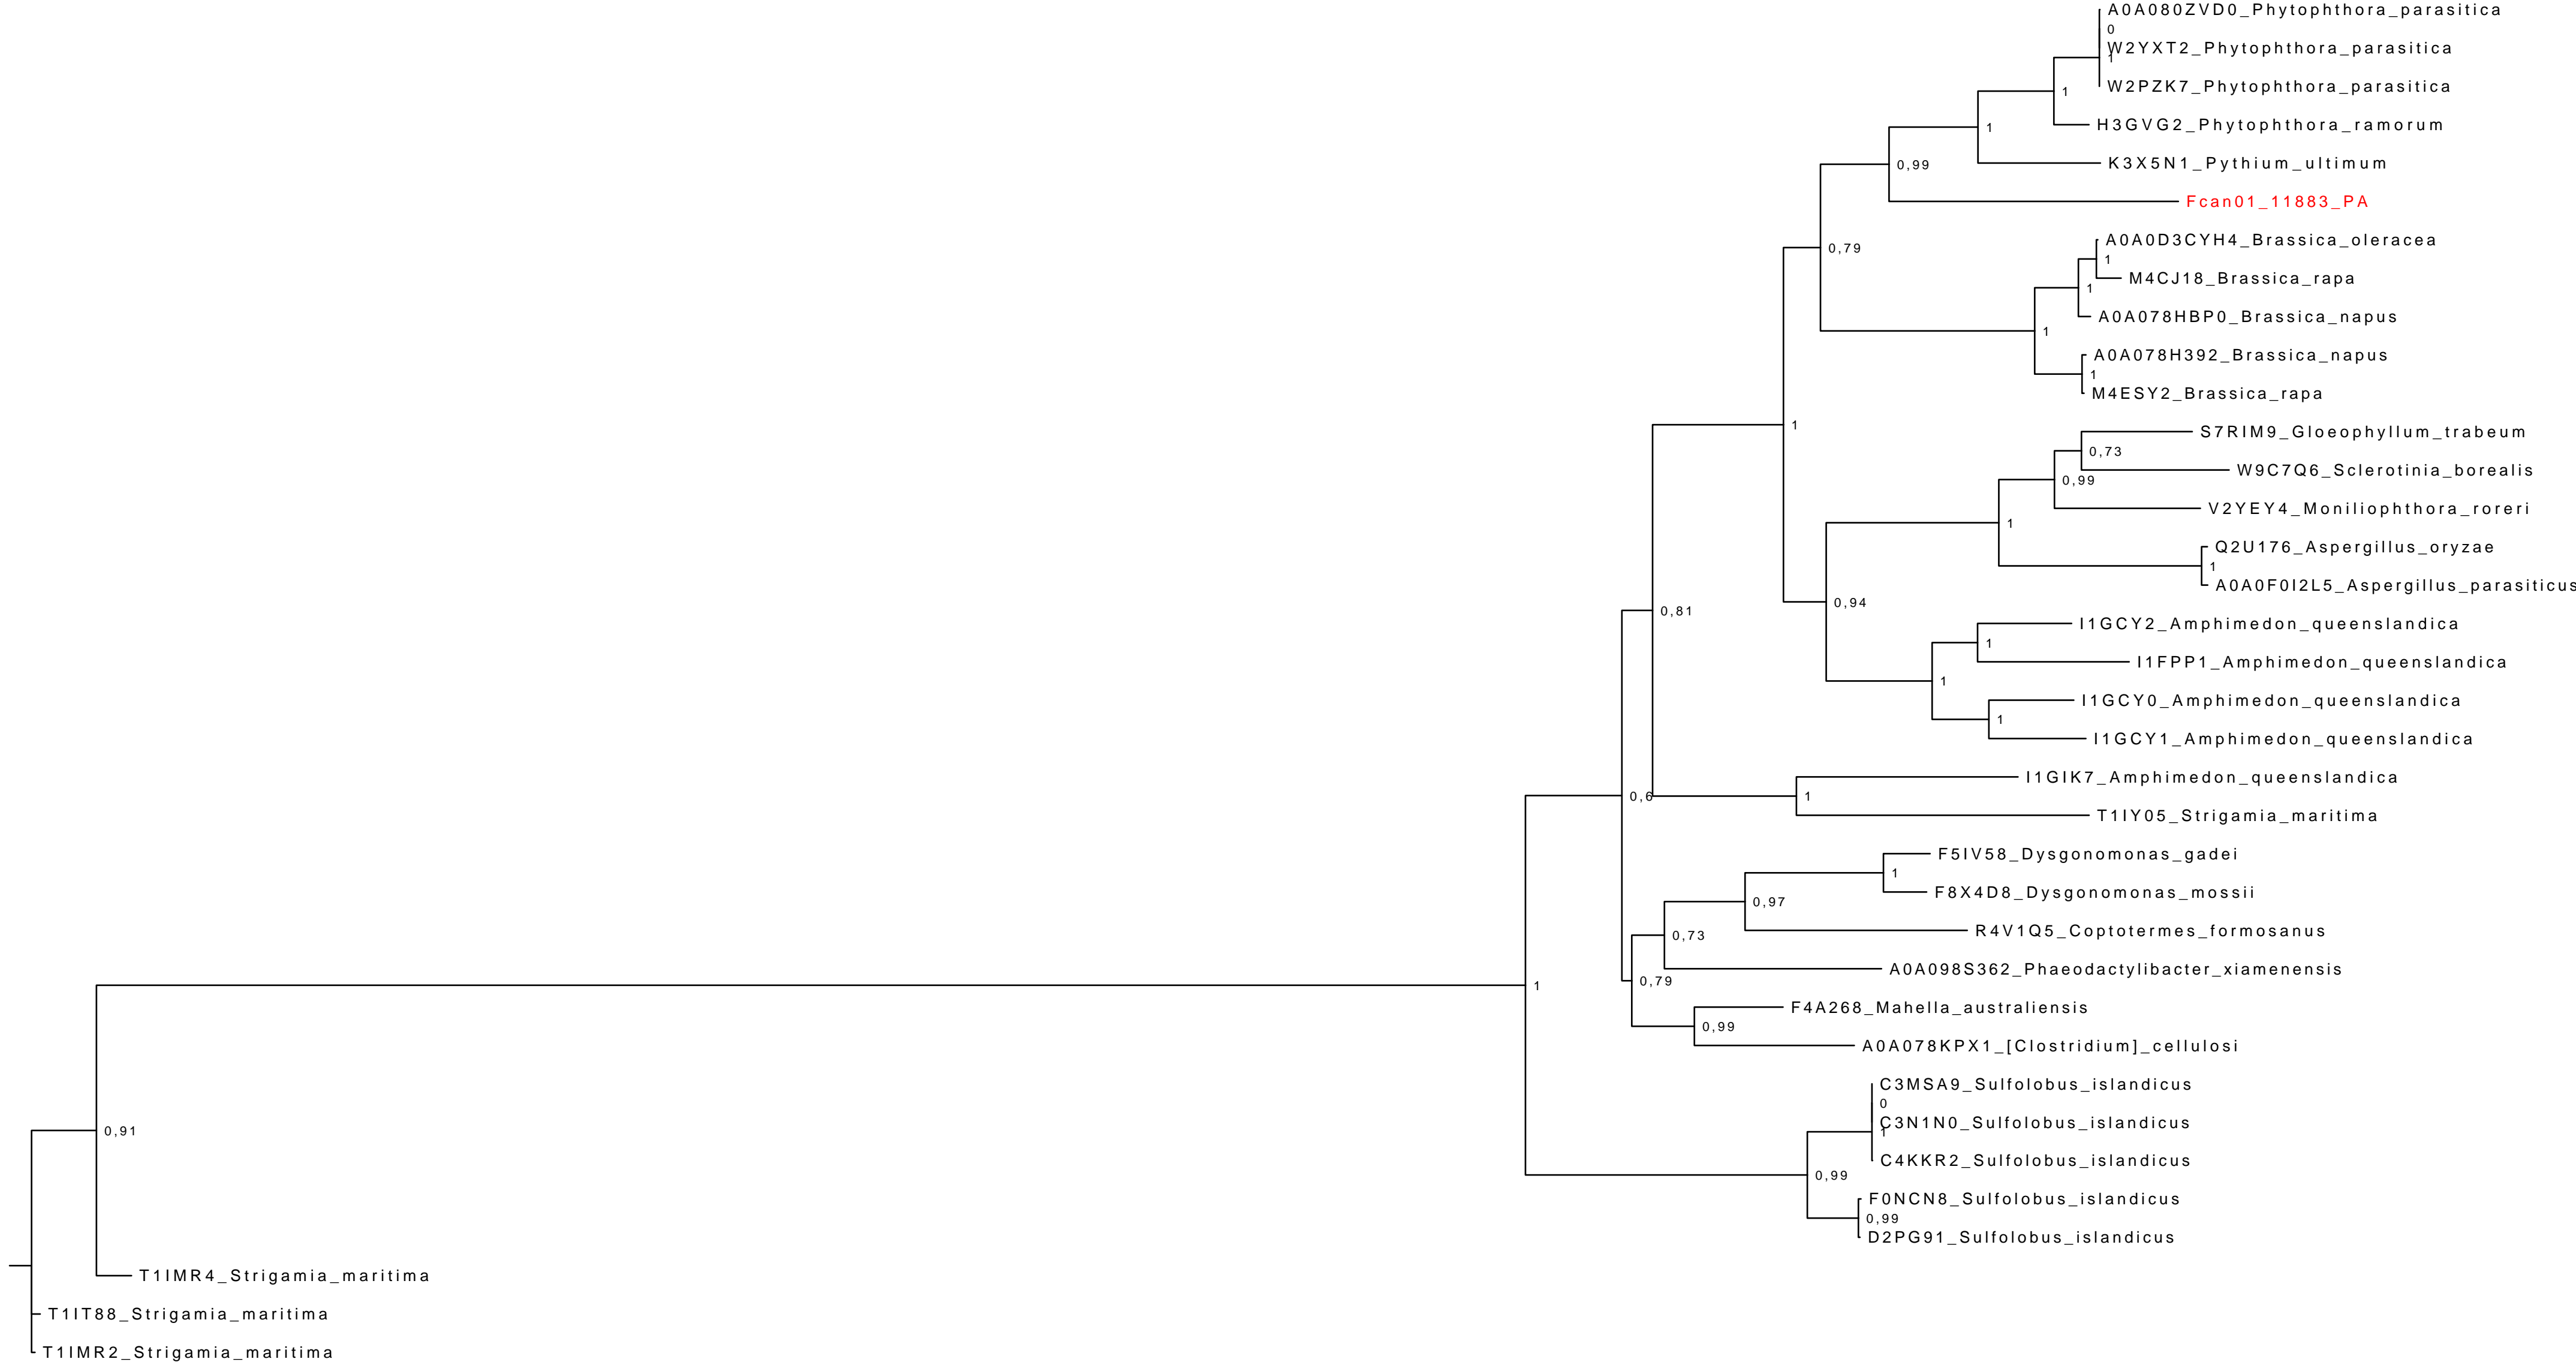

0.6

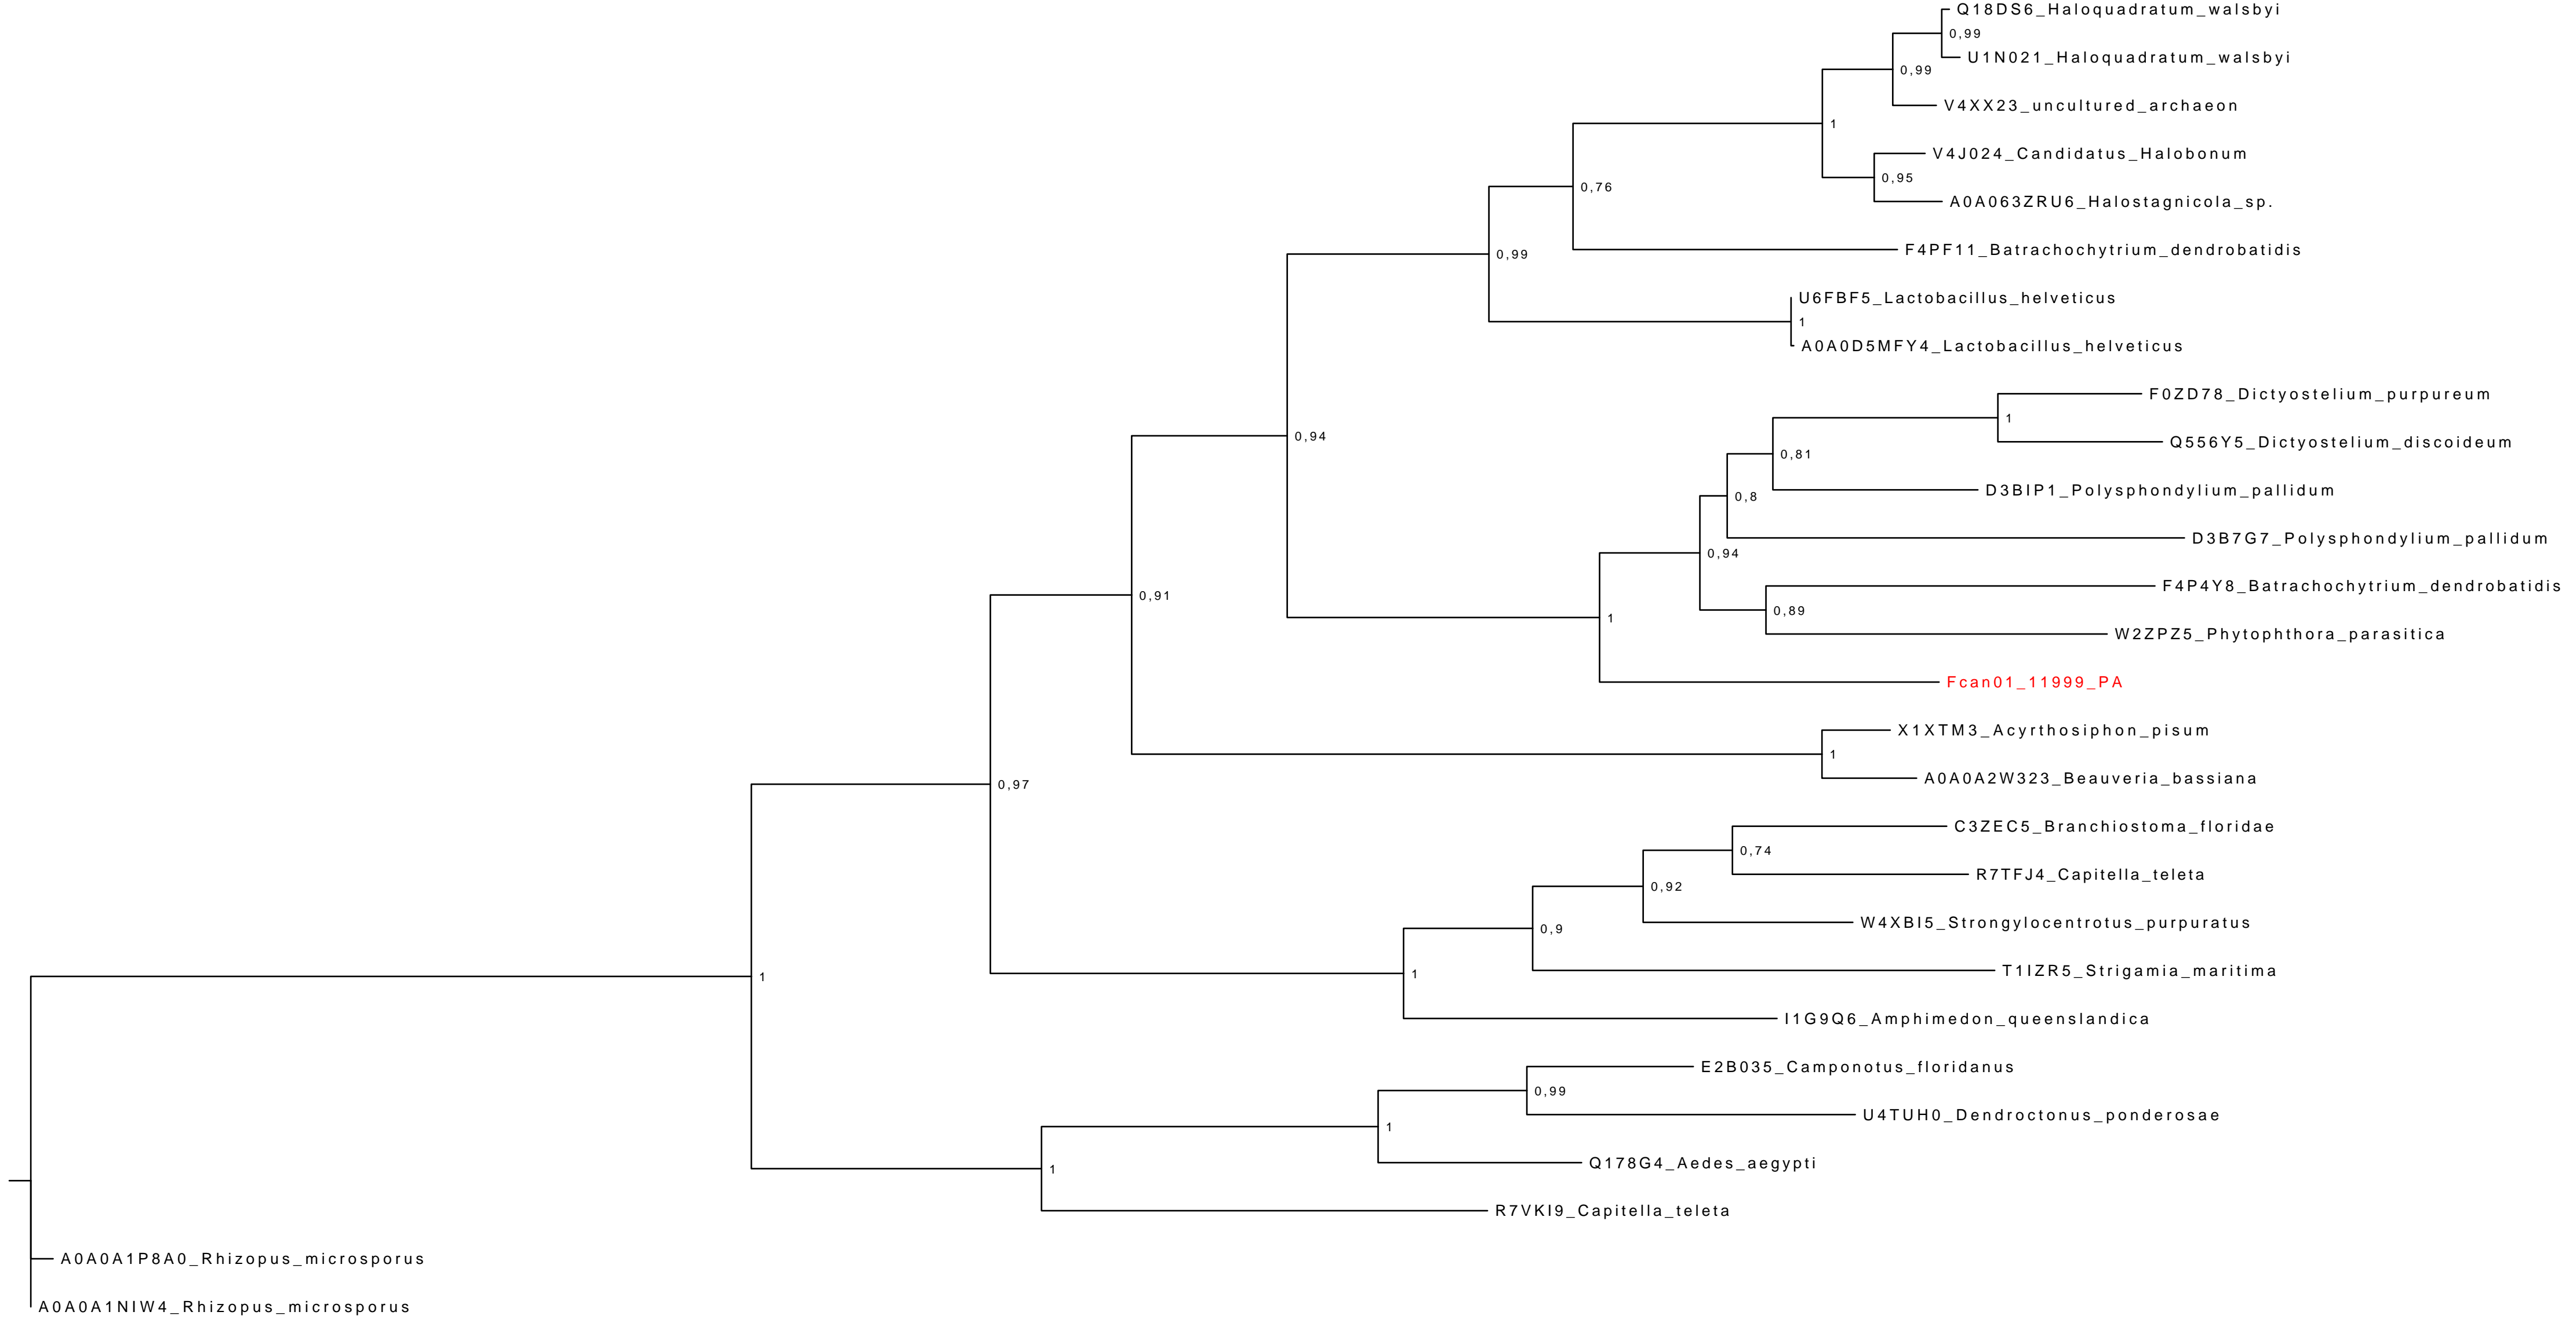

0.5



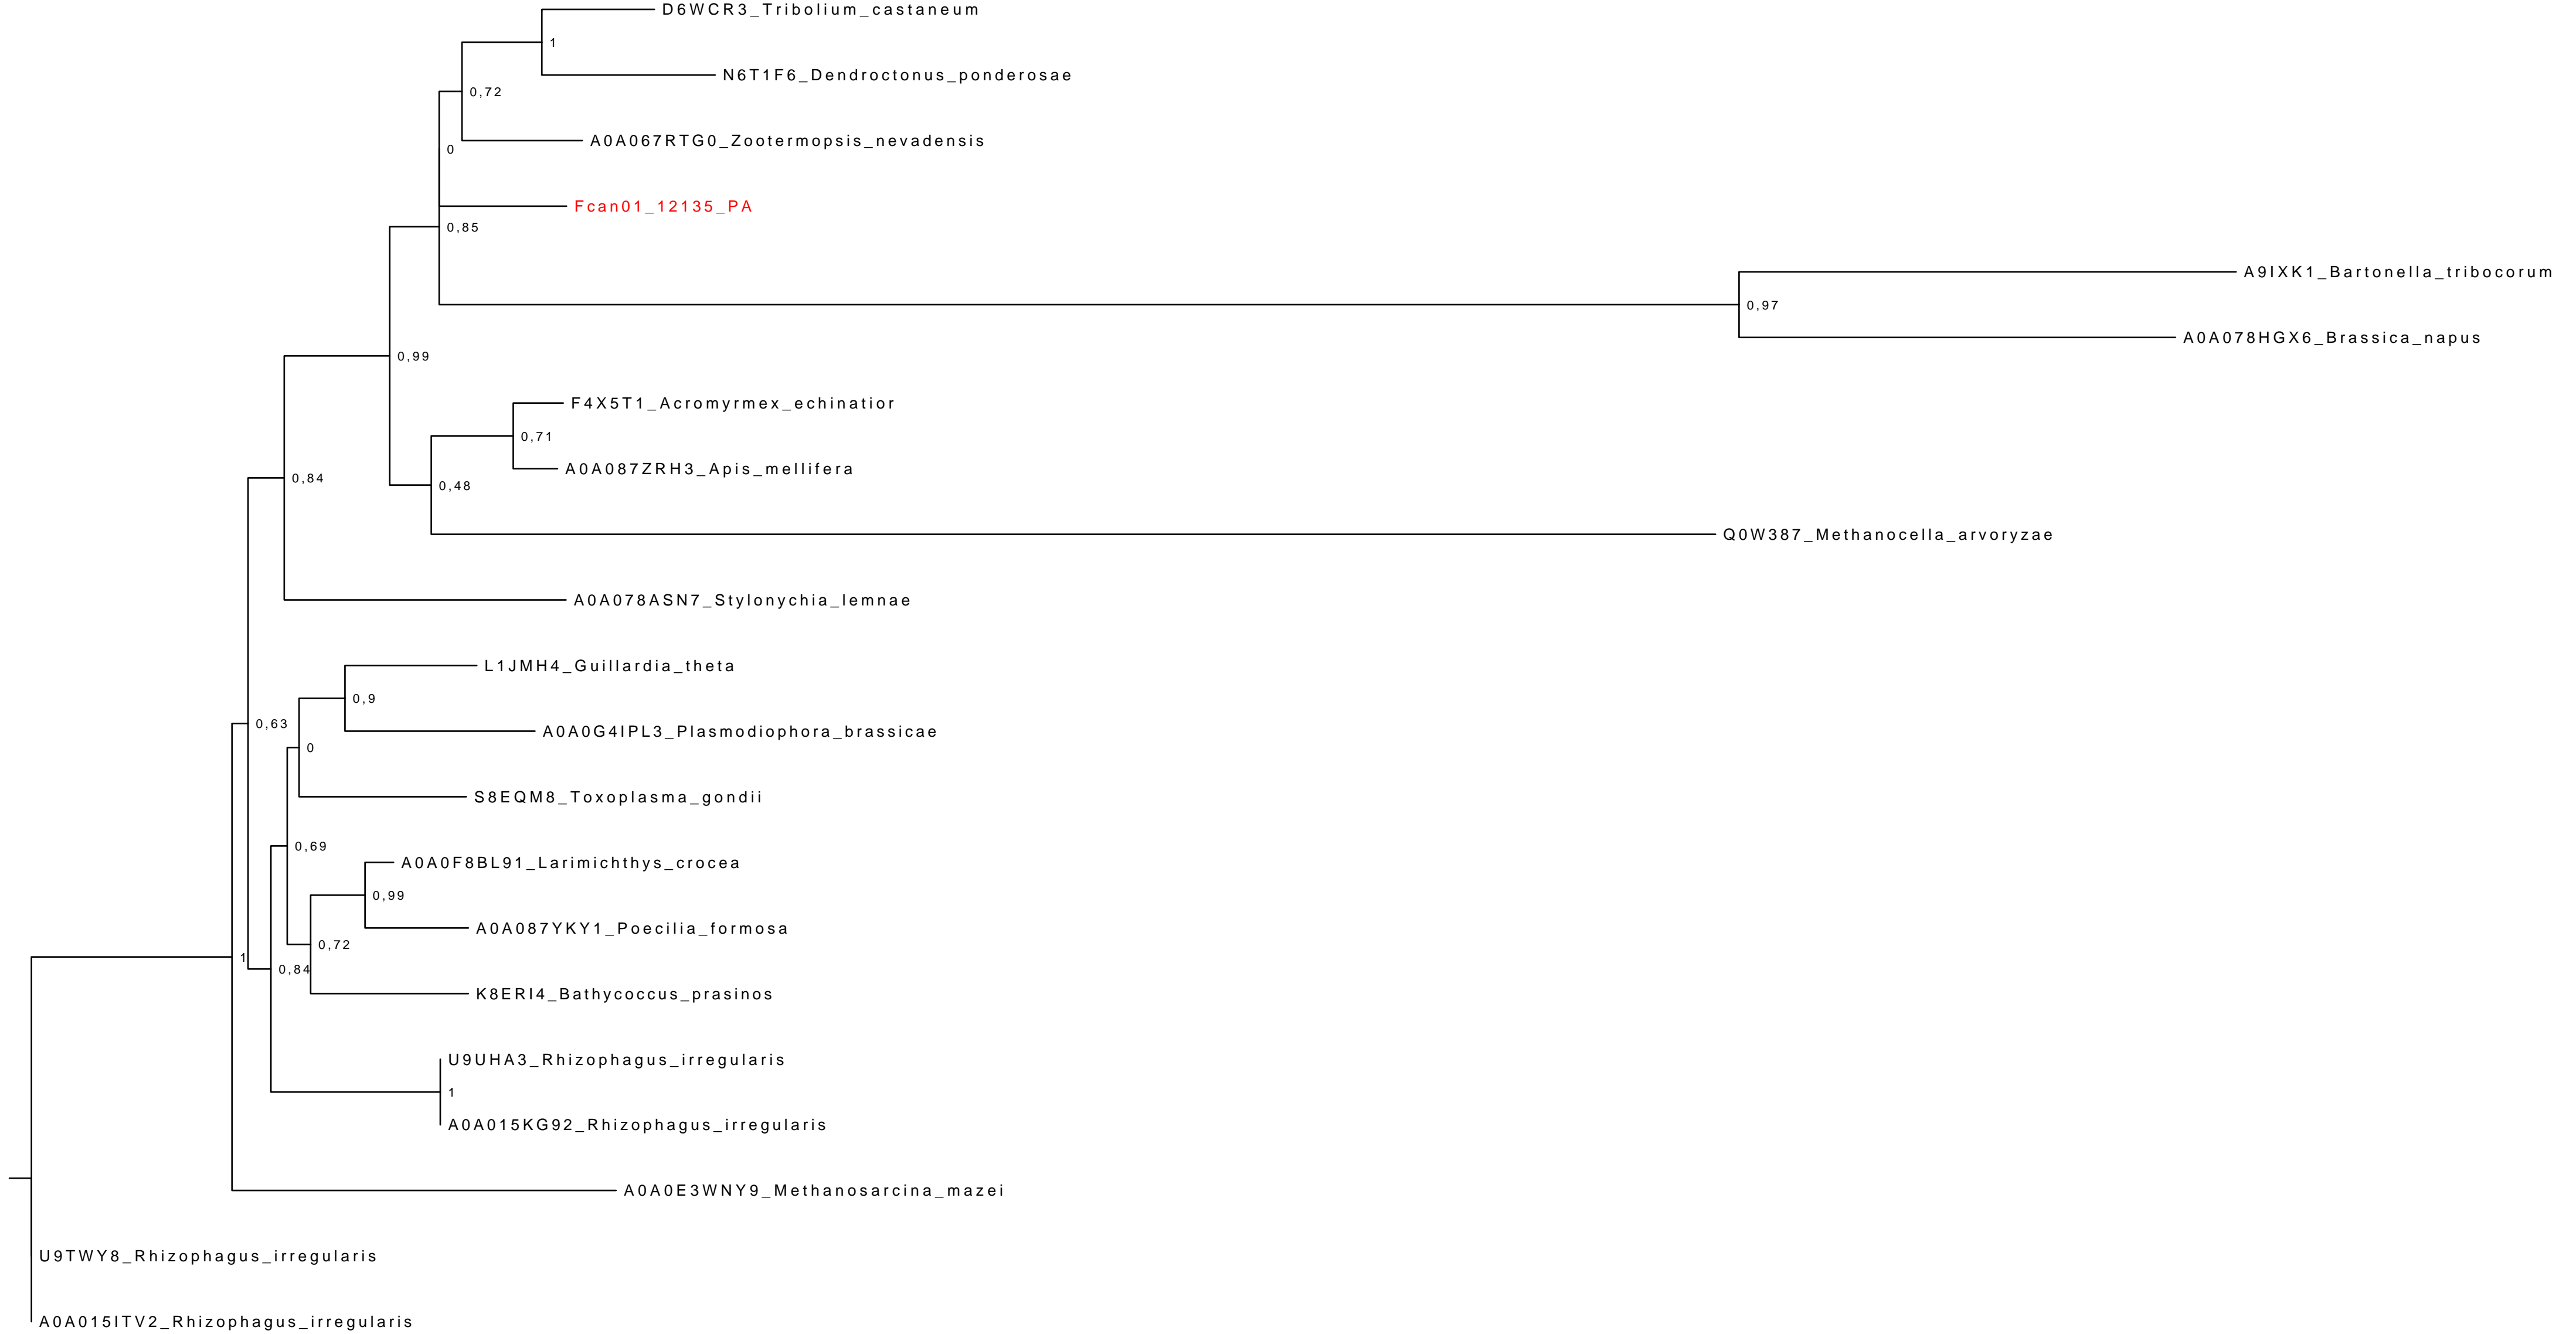

2.0

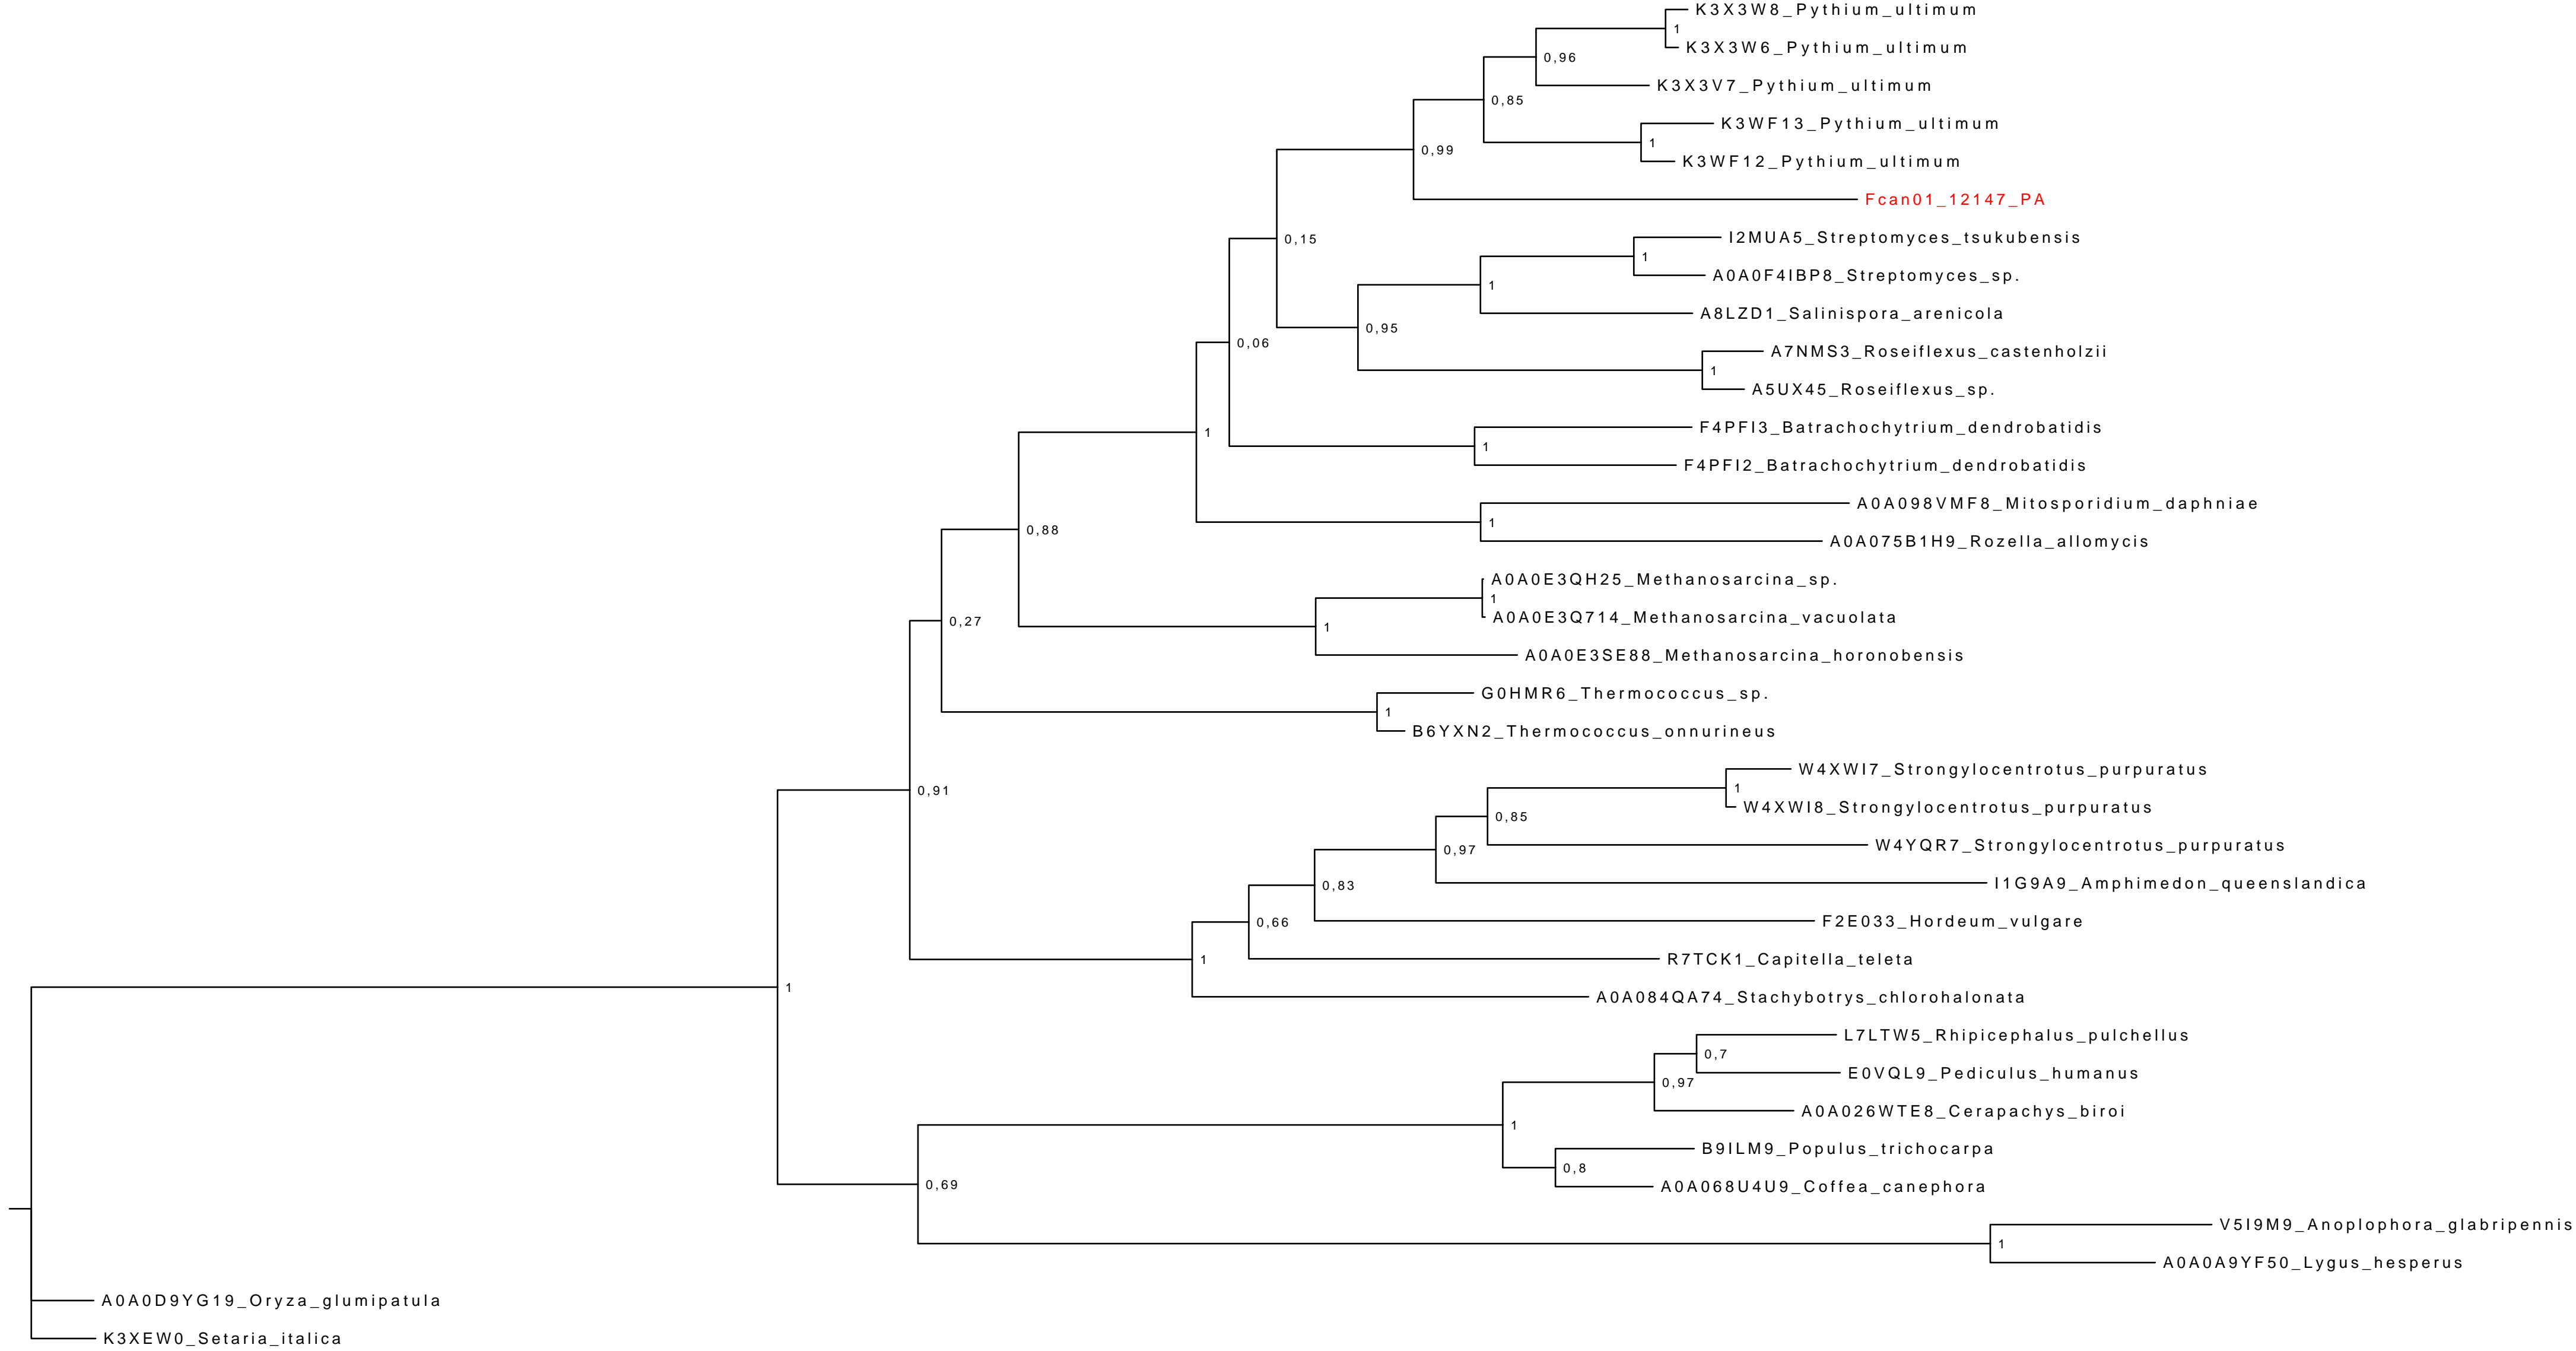

0.5

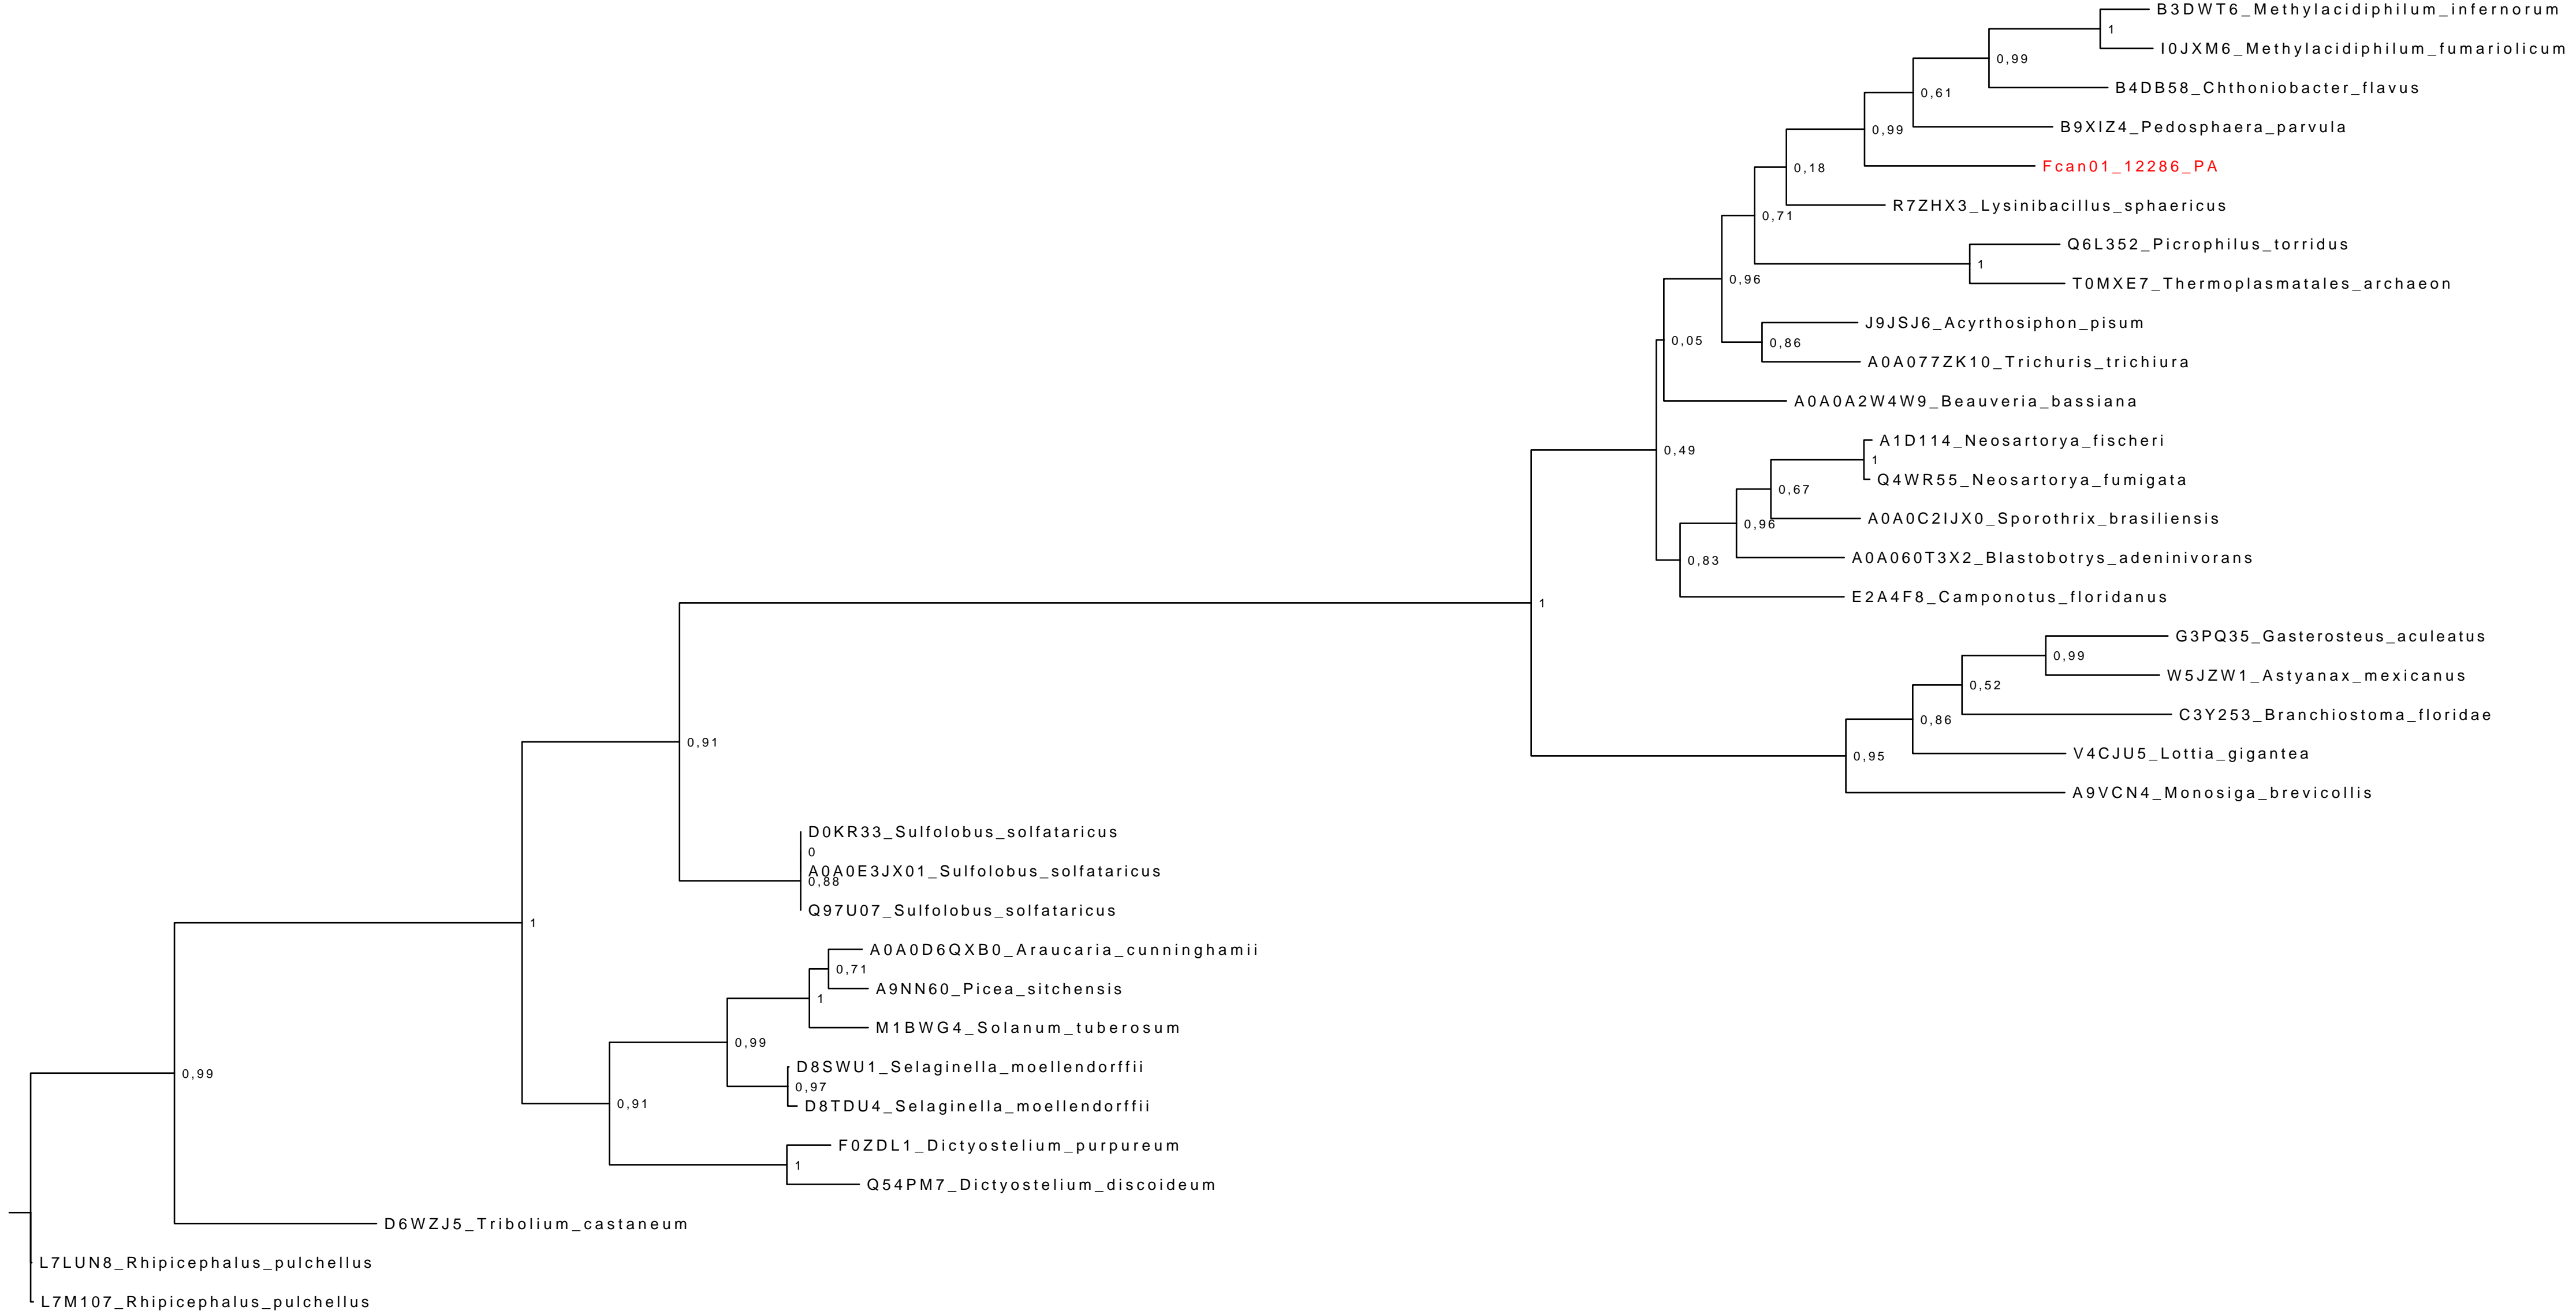

0.9

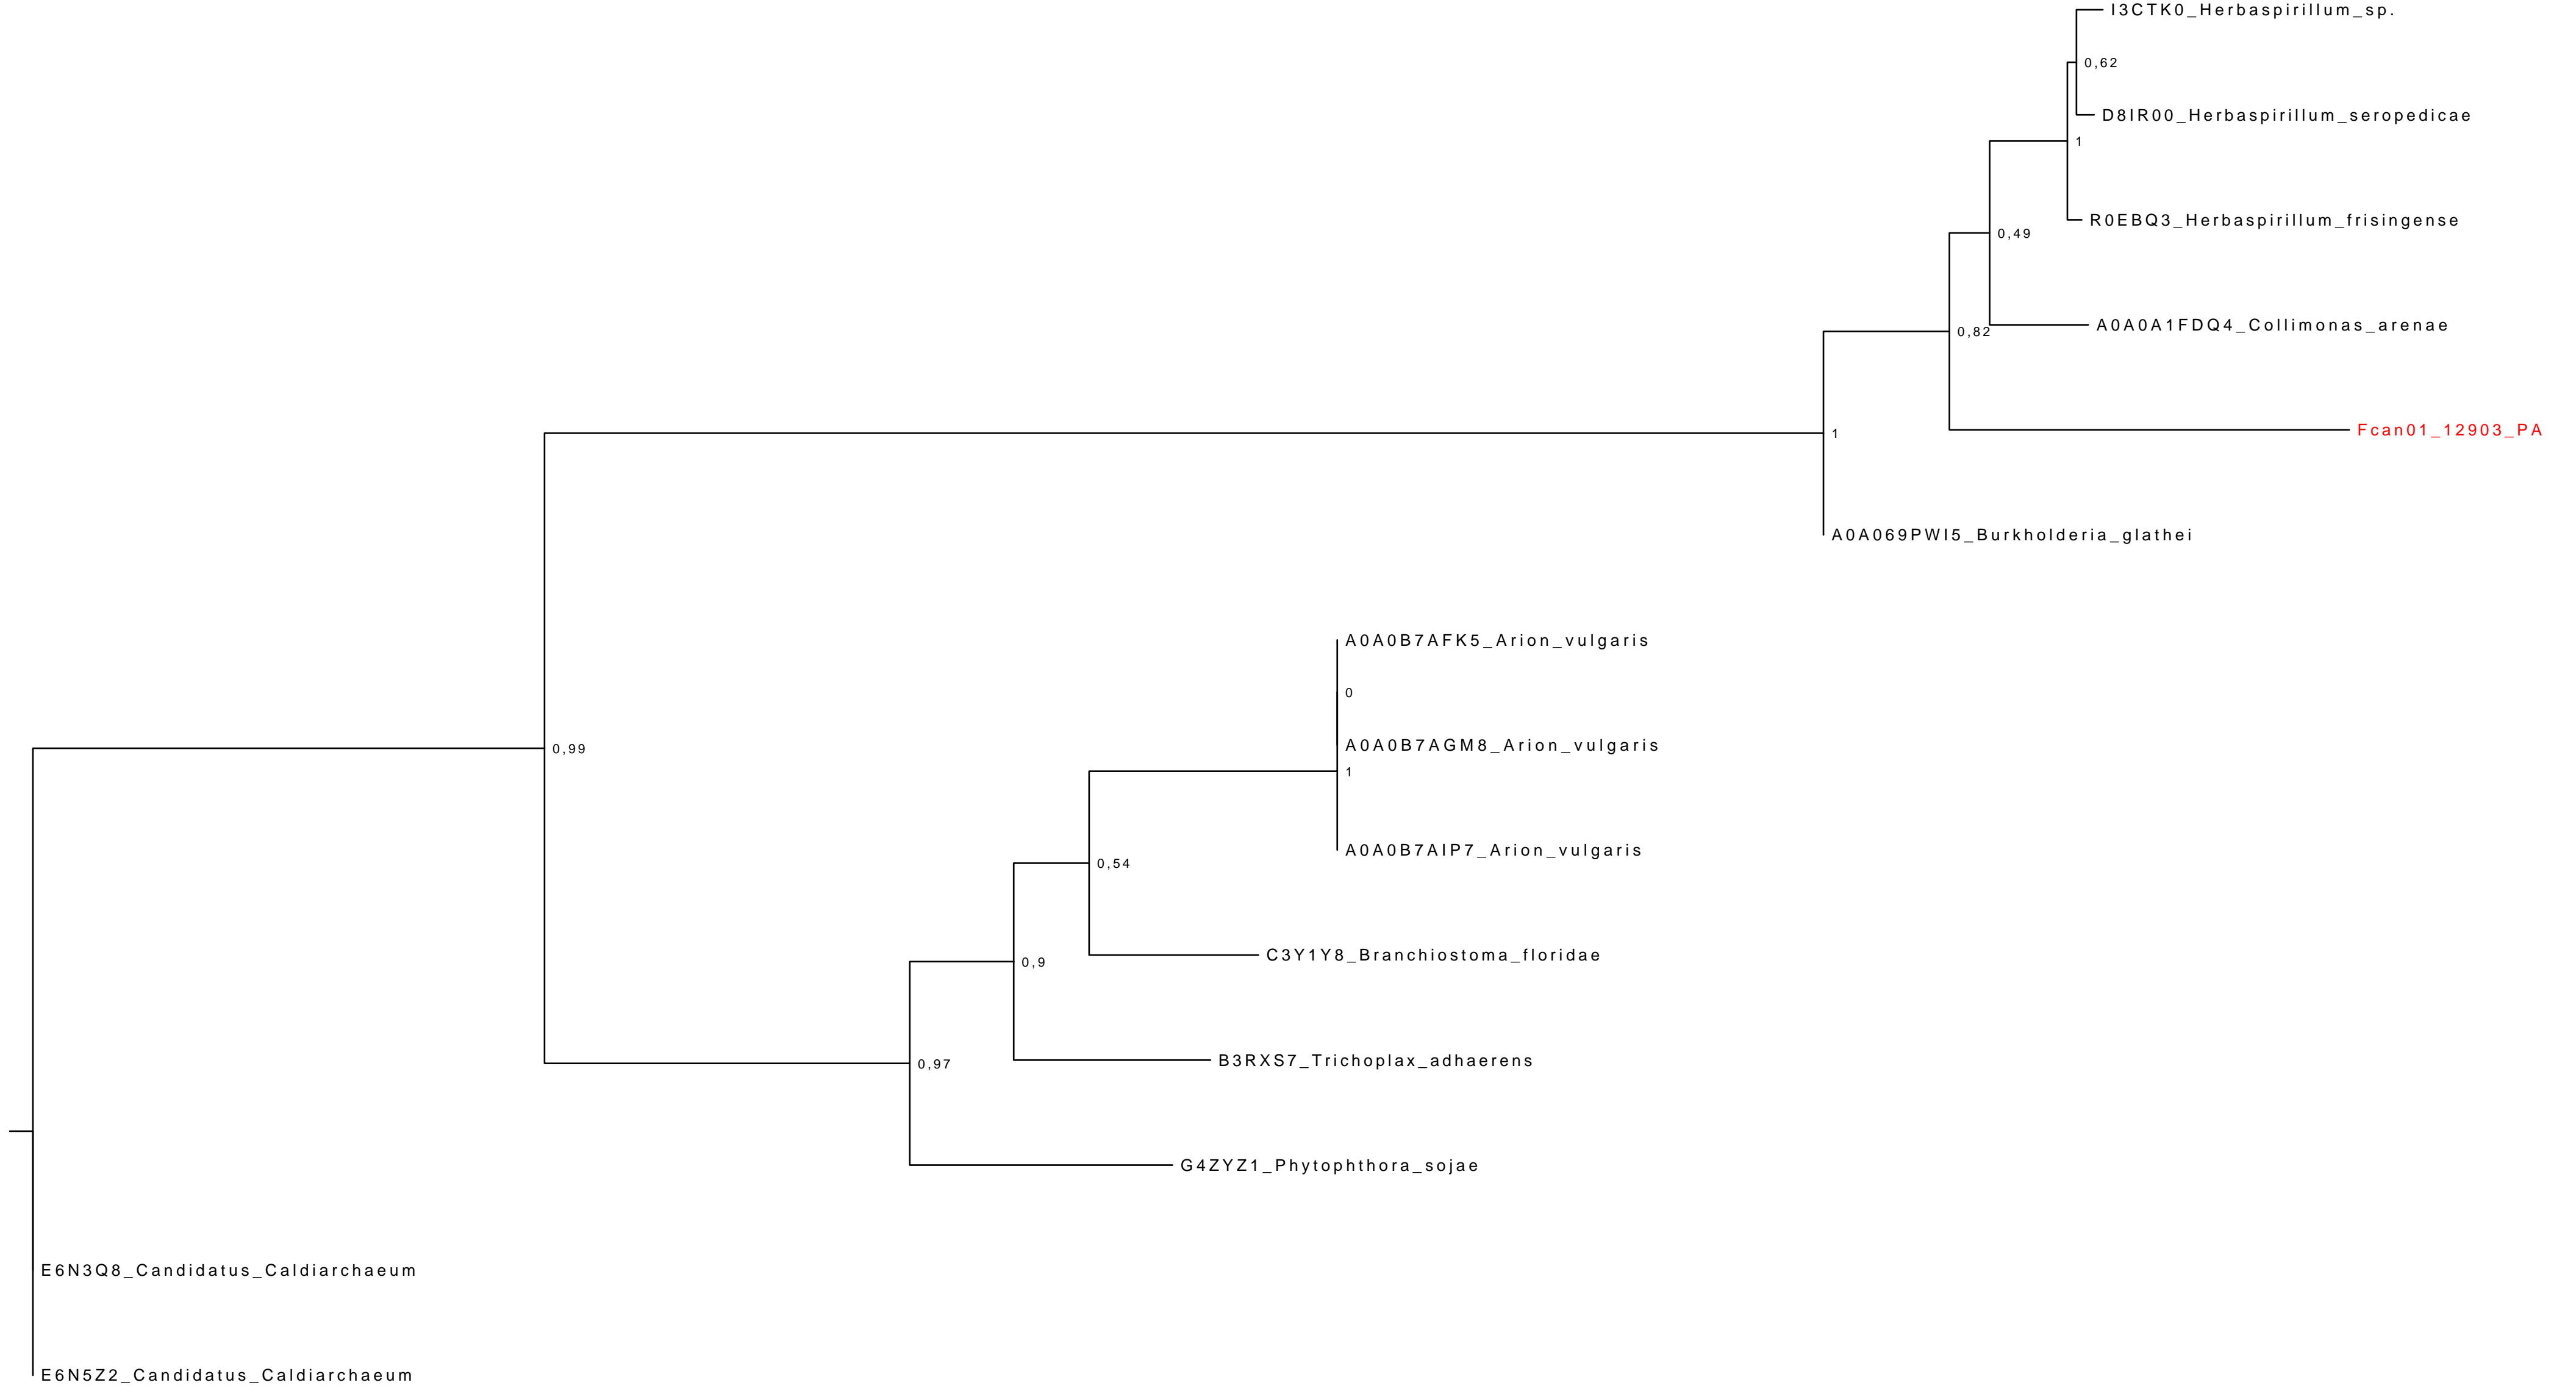

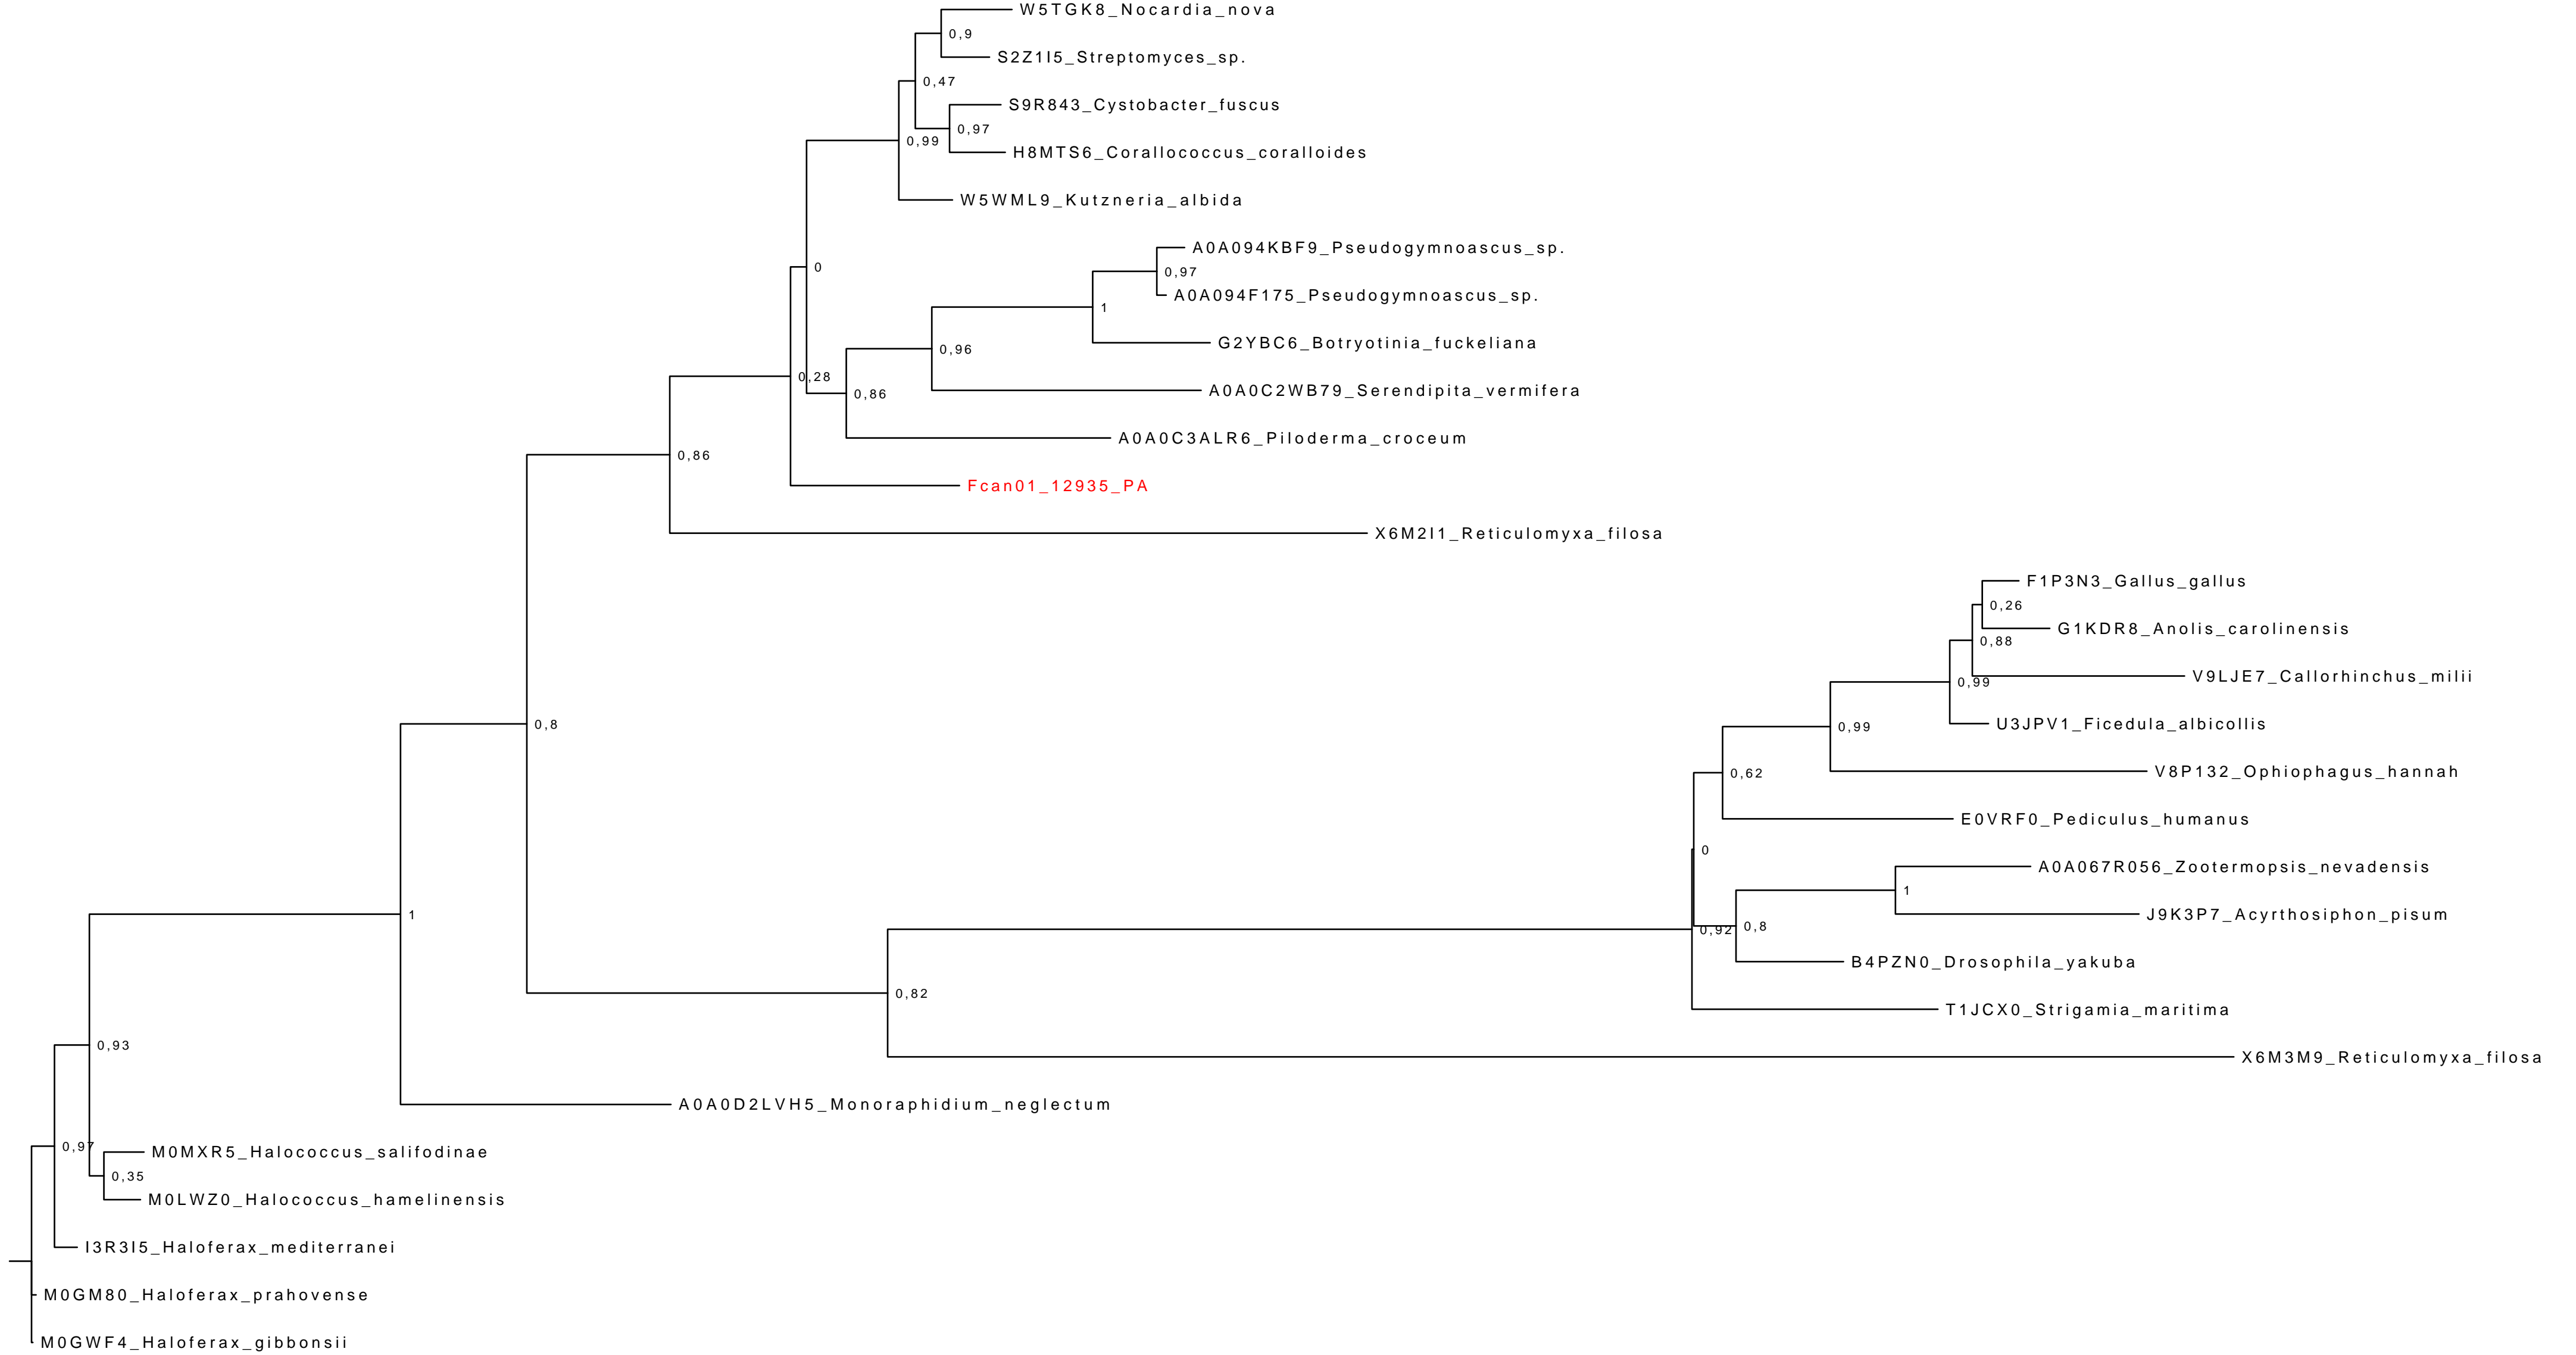

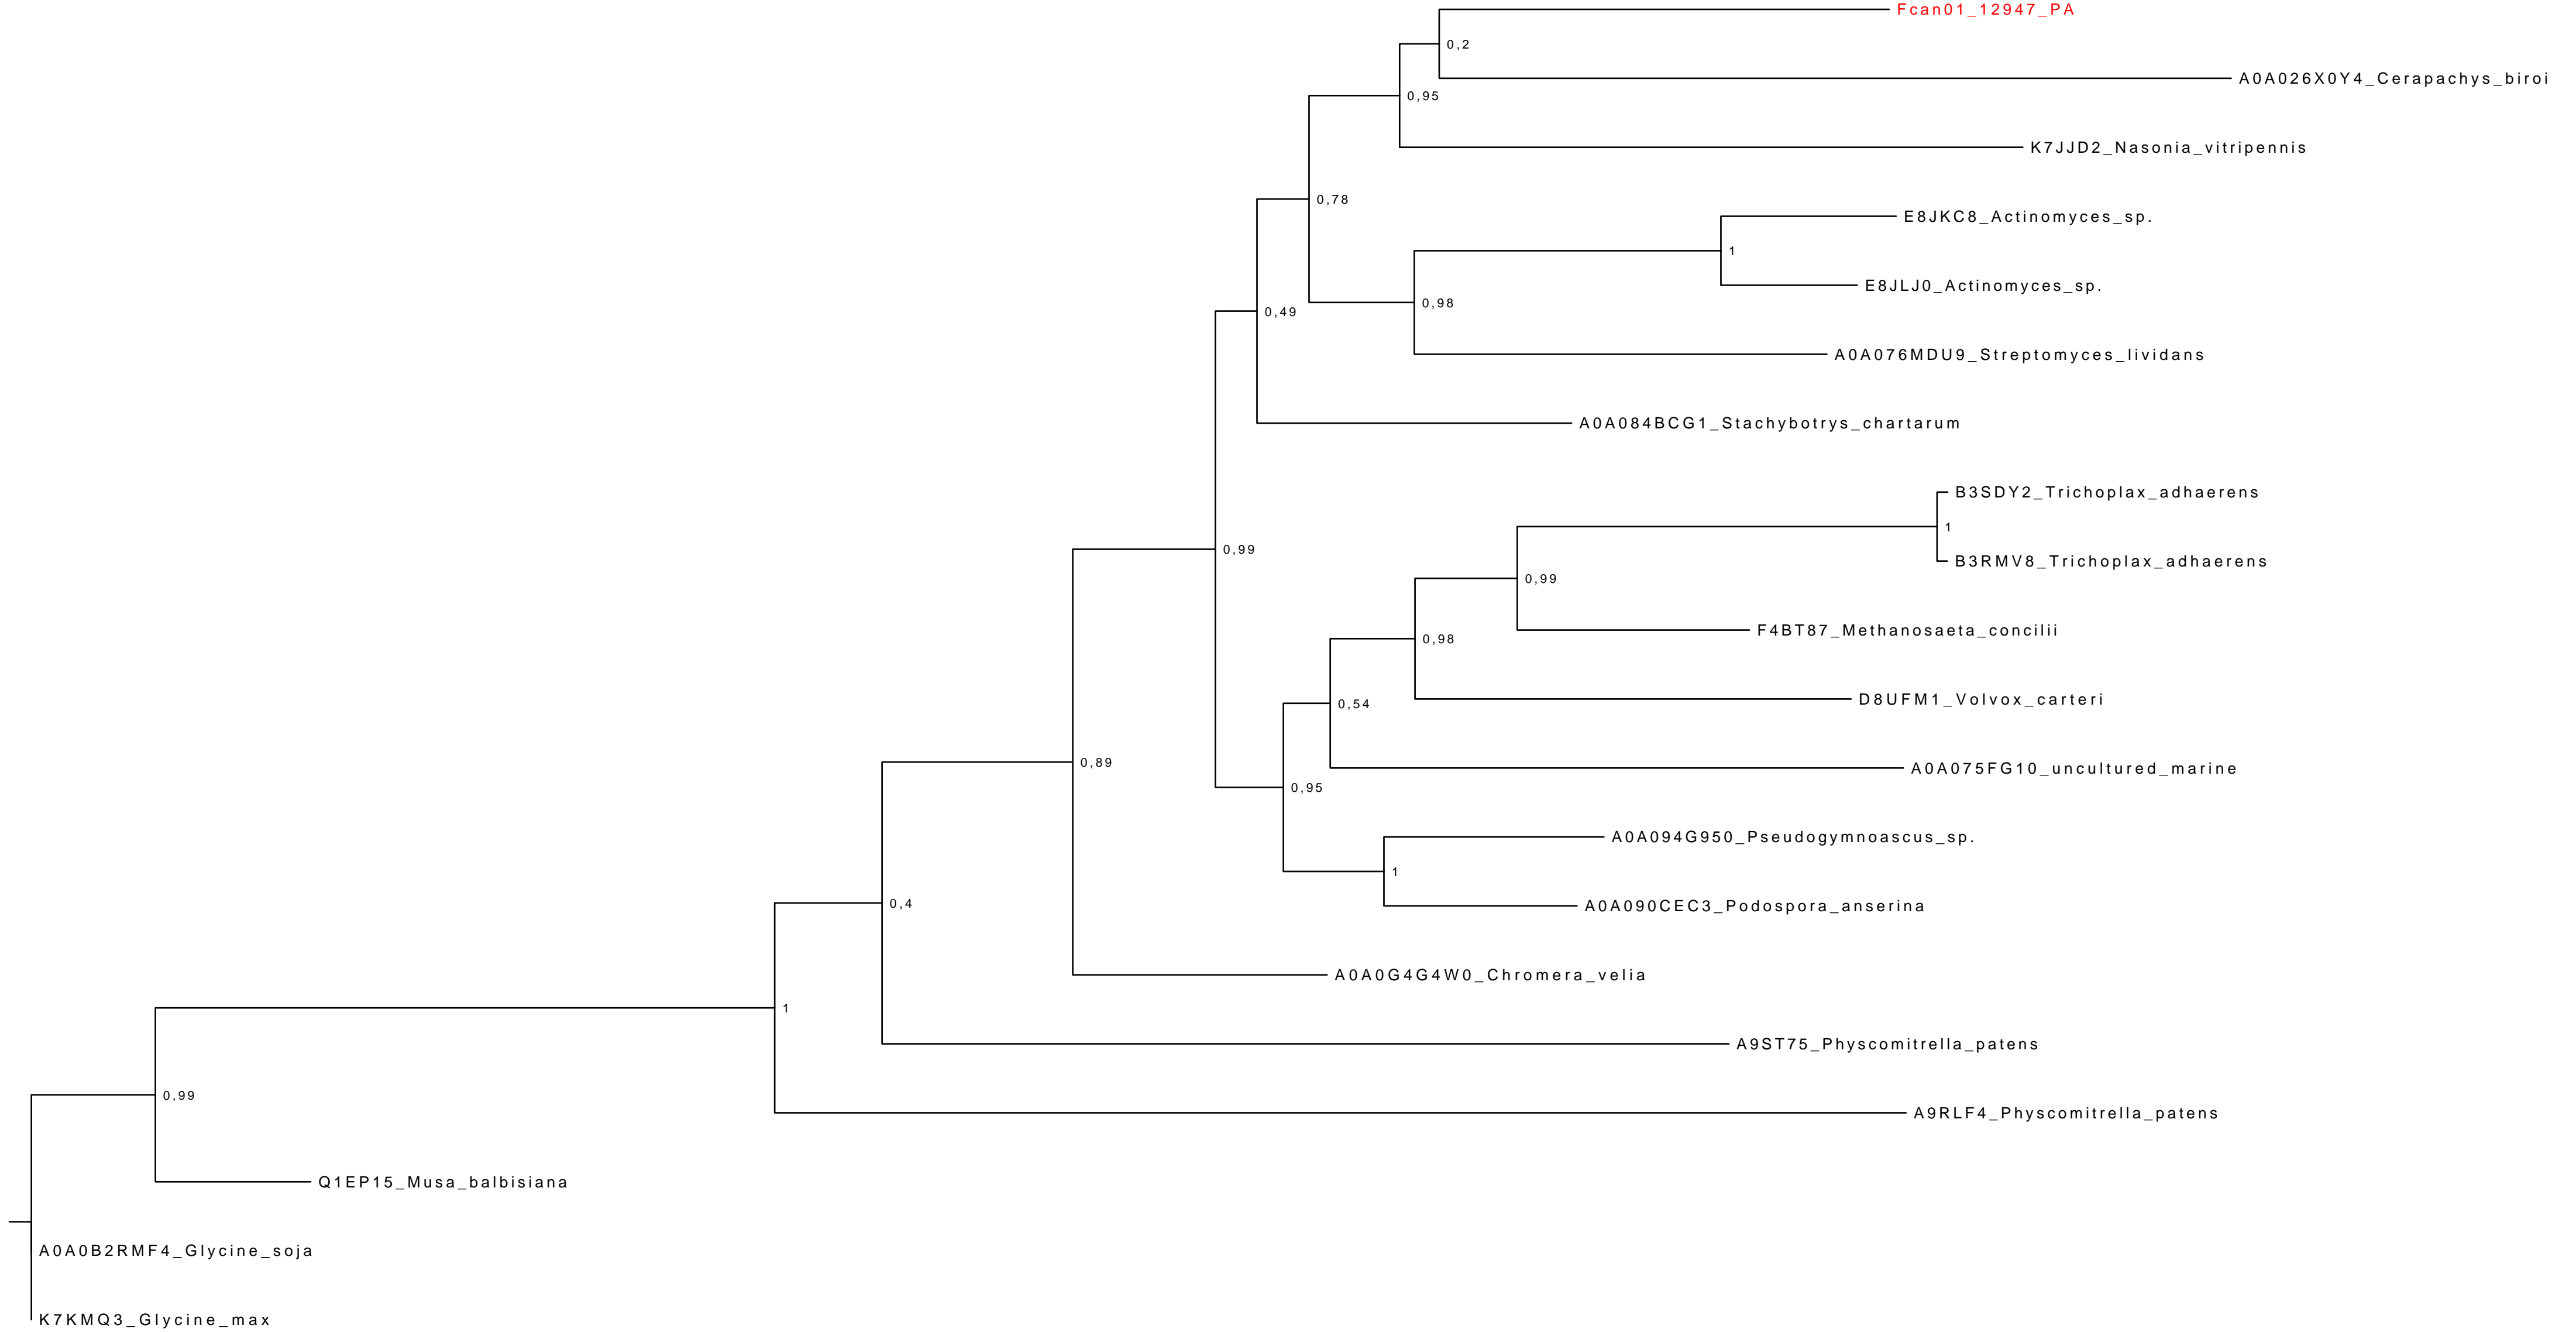

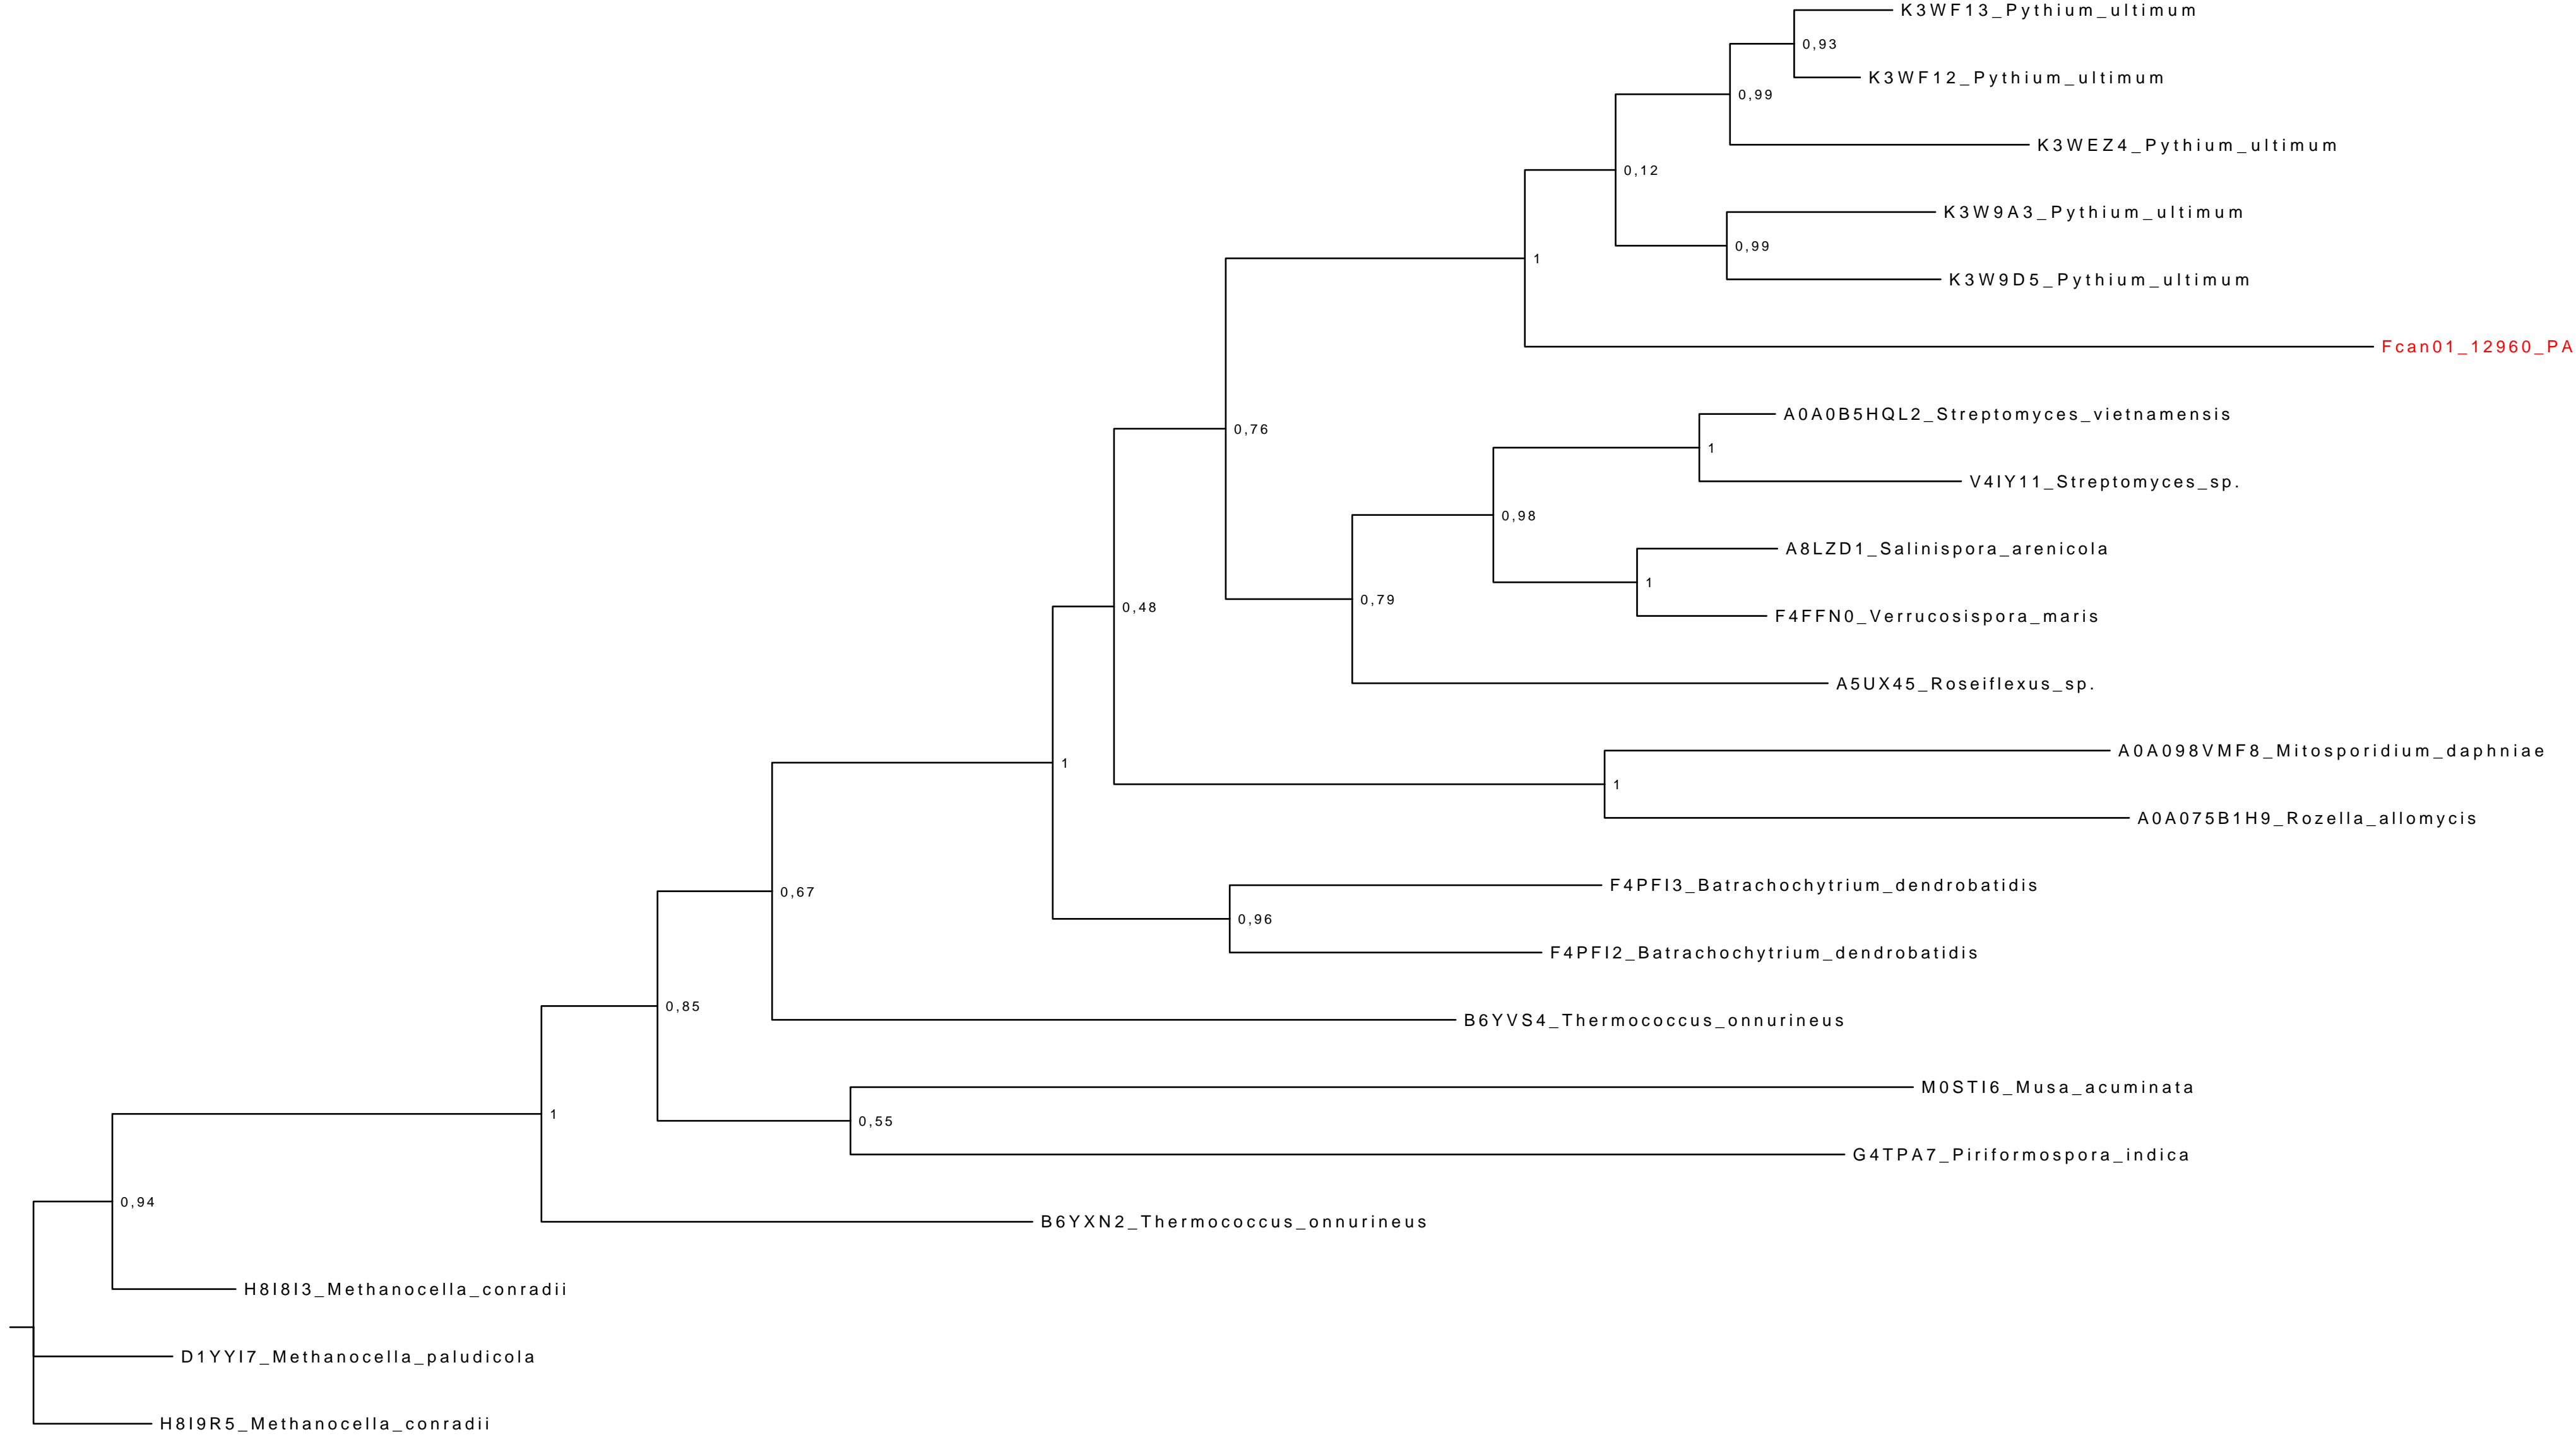

0.4

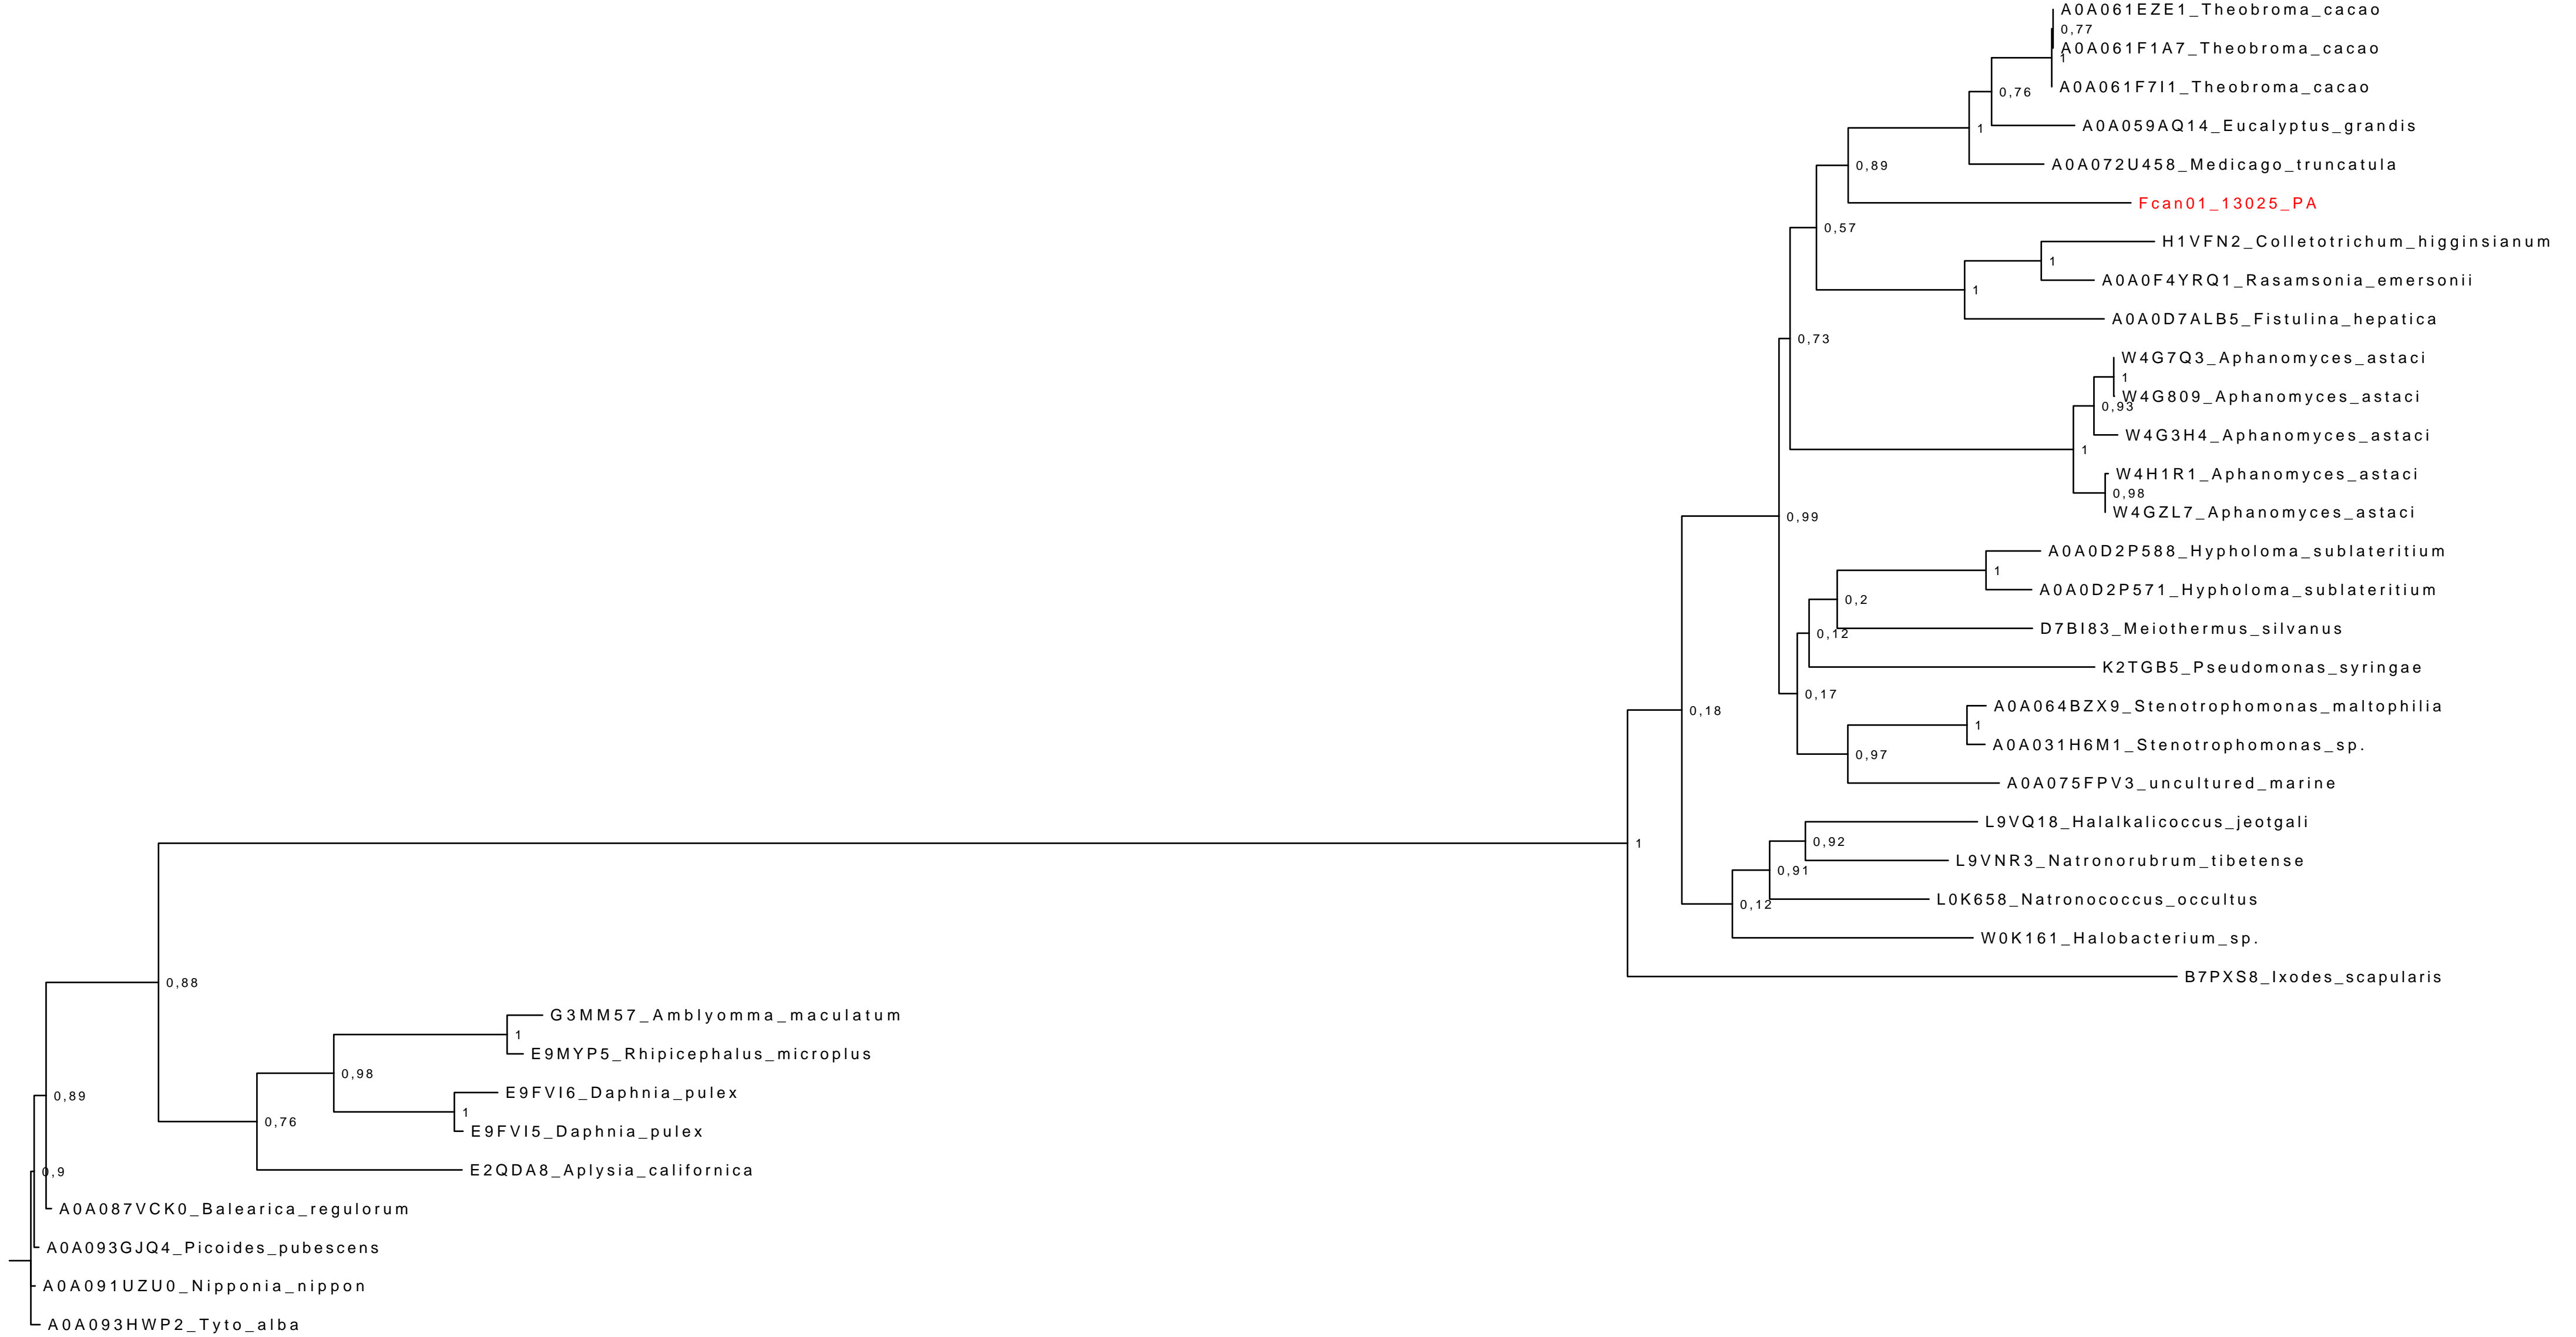

0.7



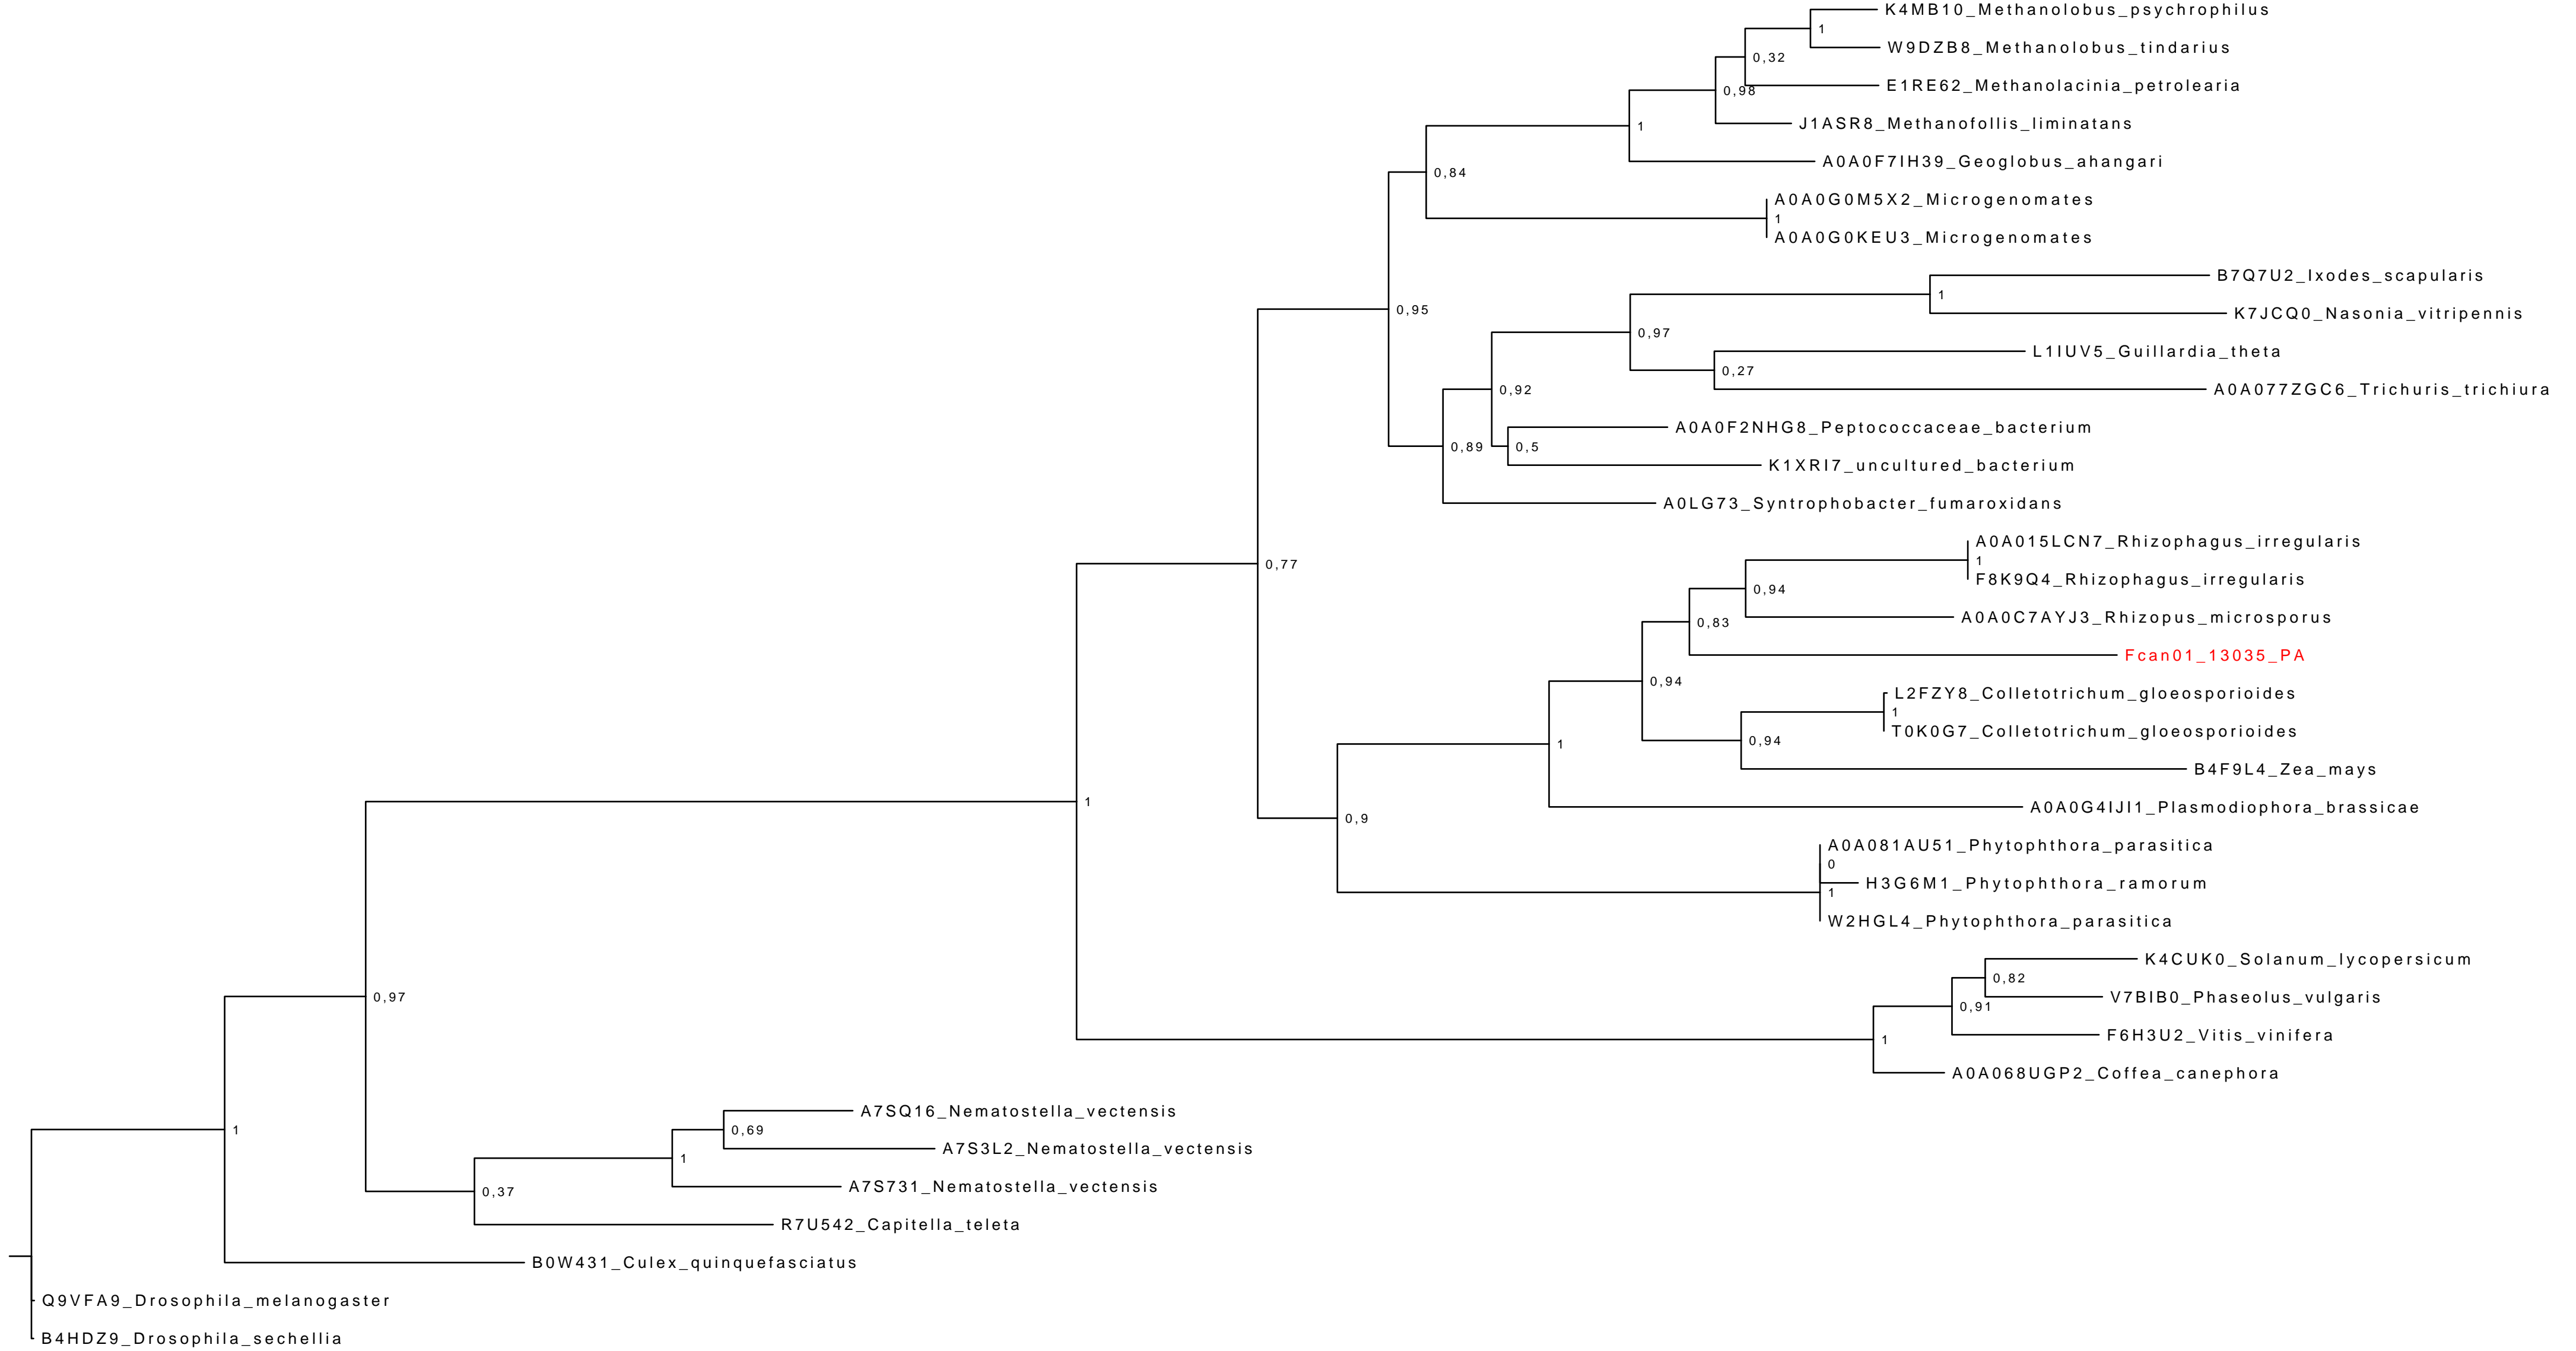

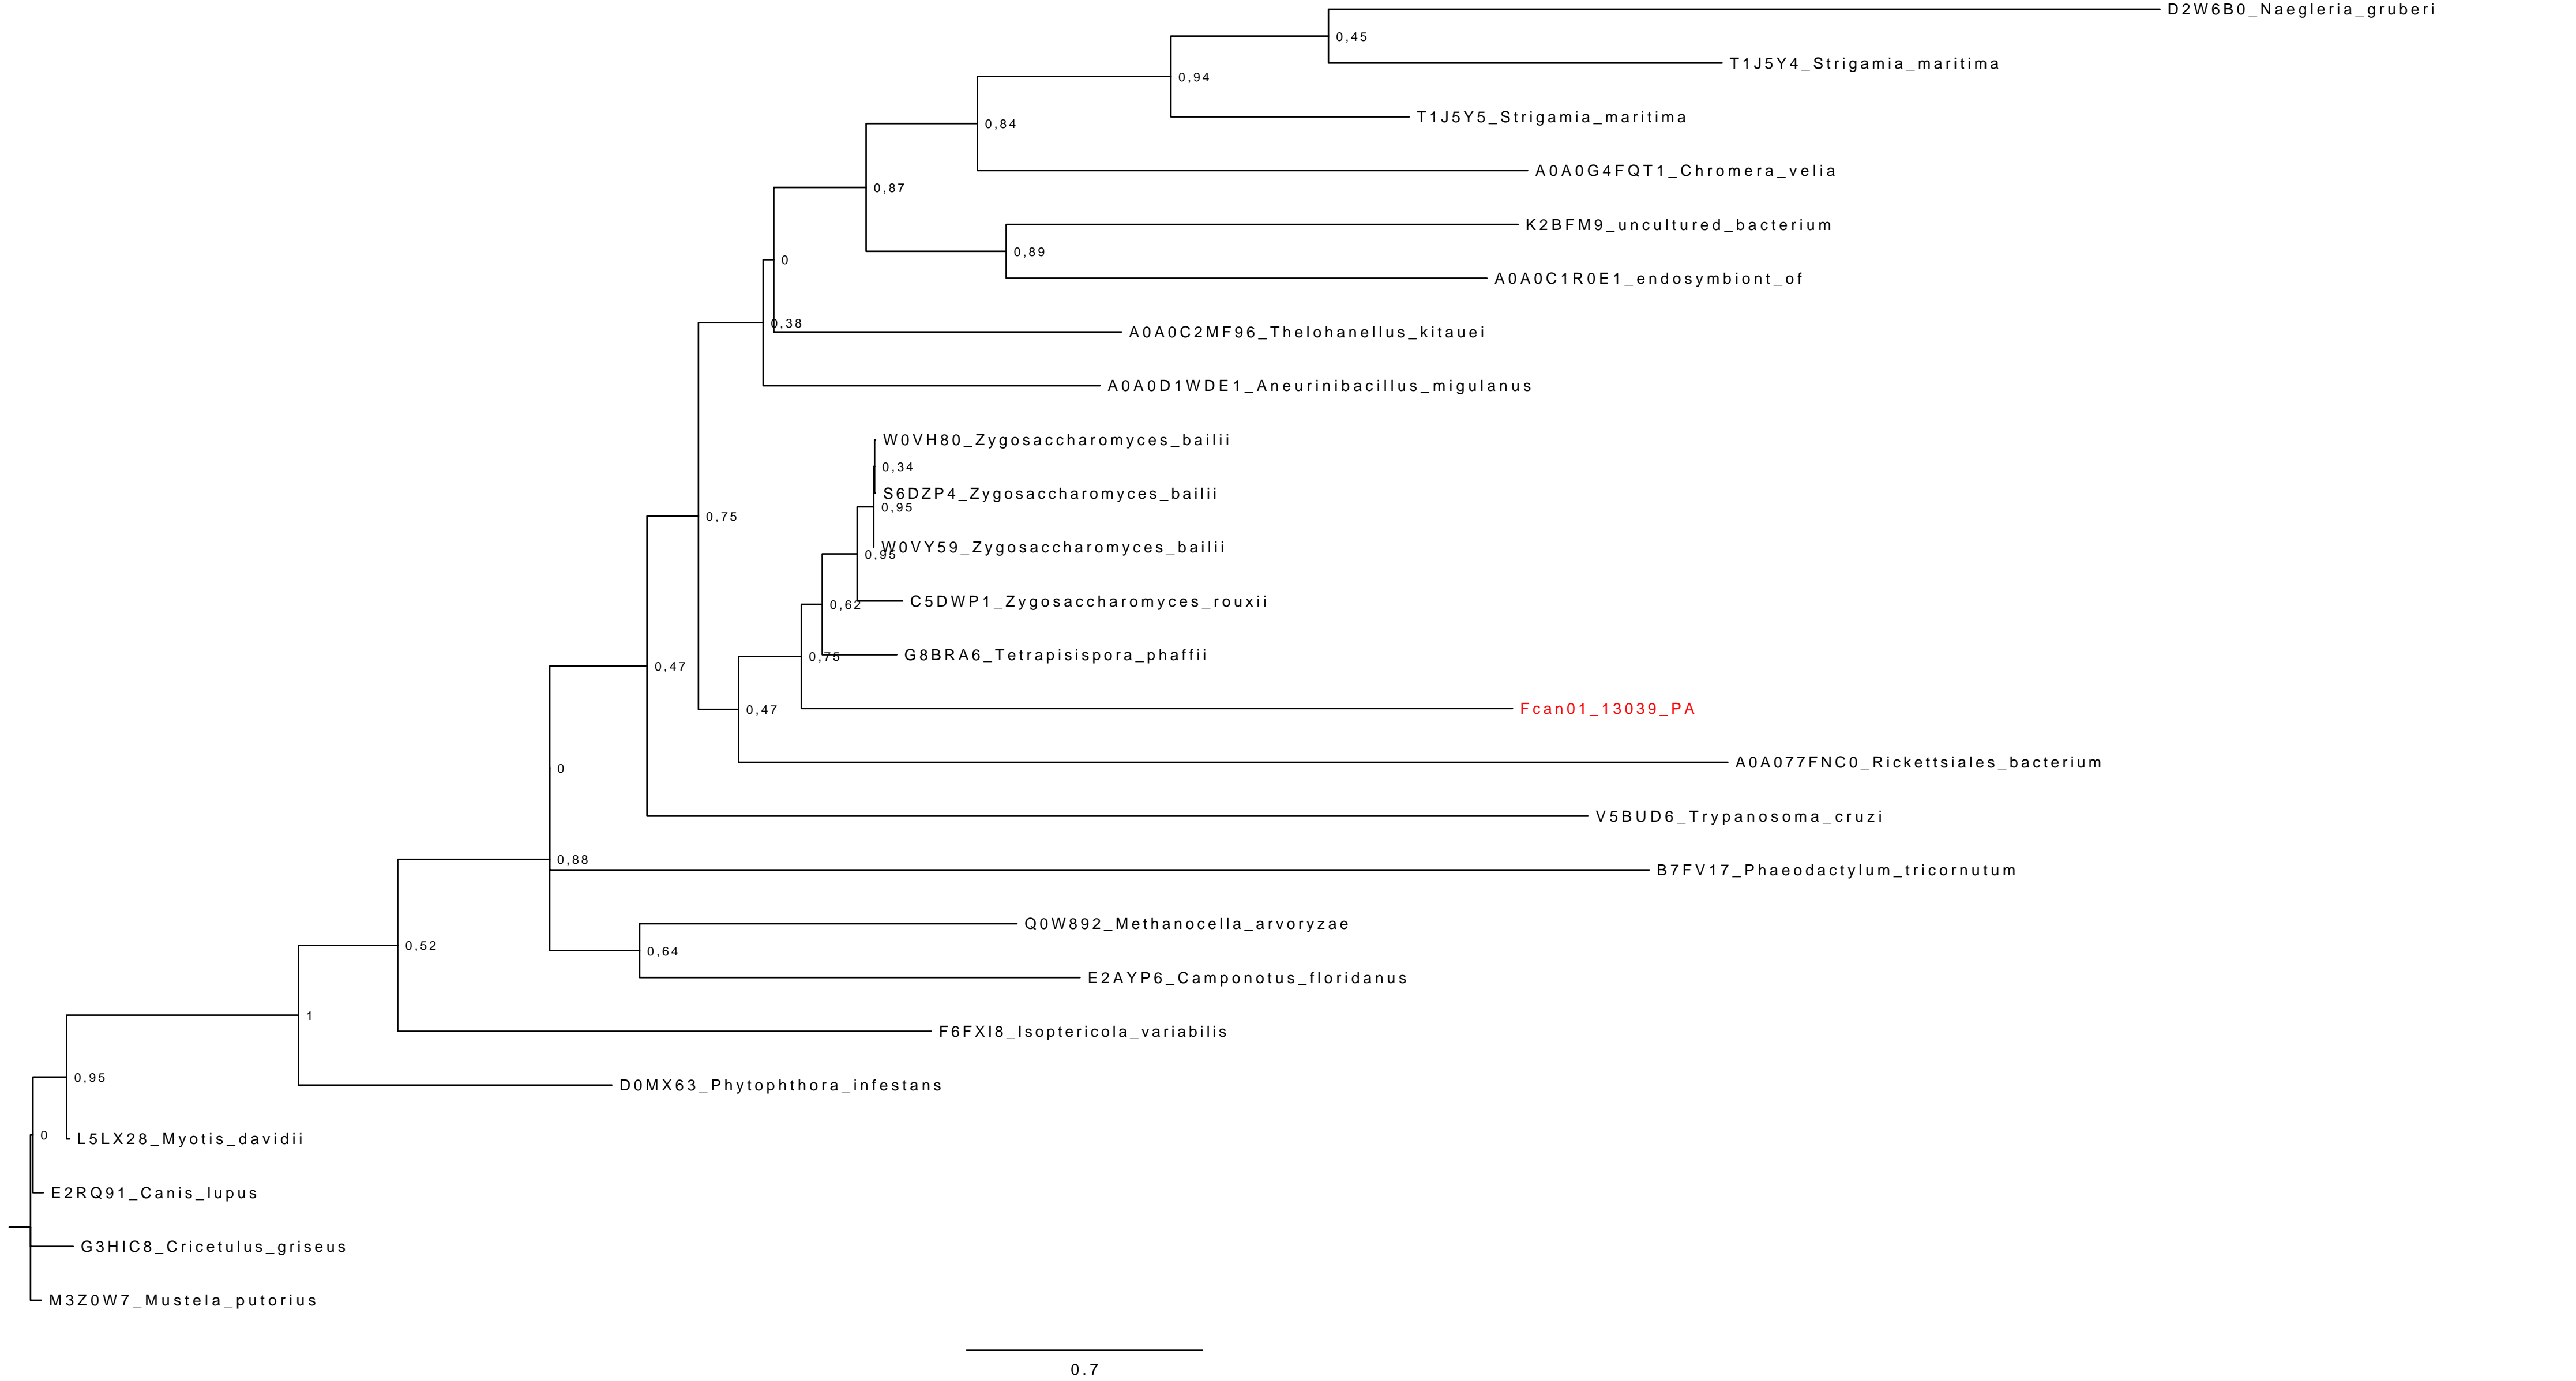

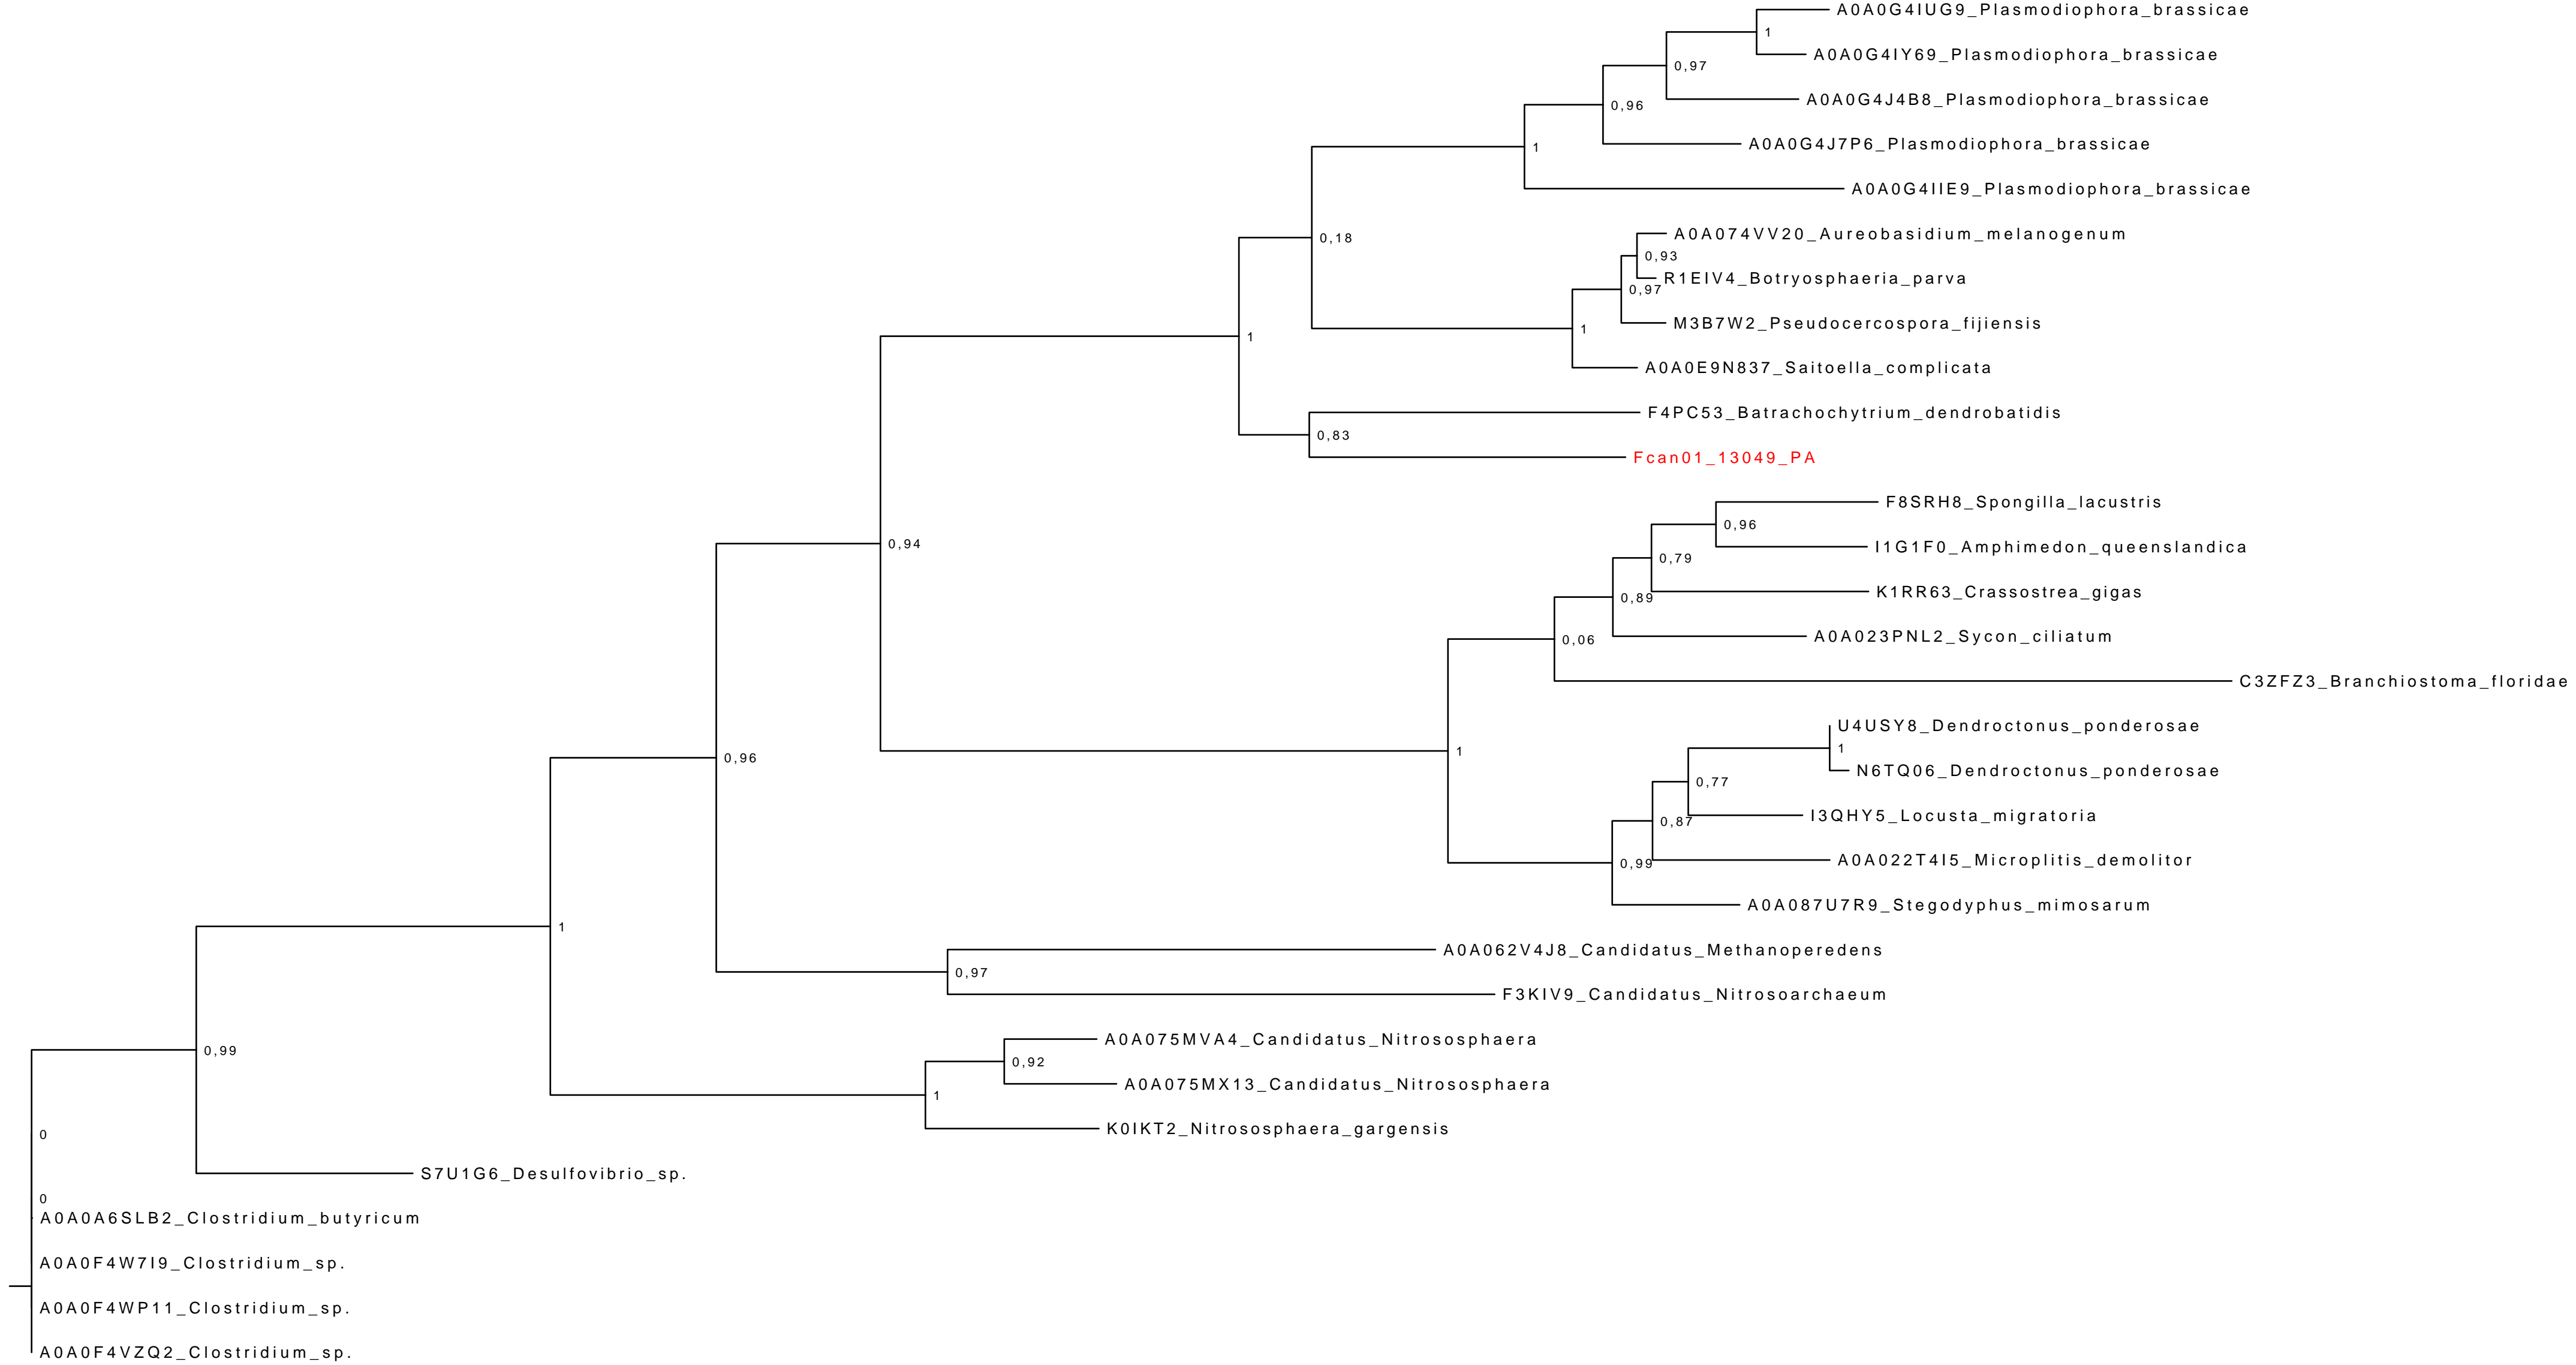

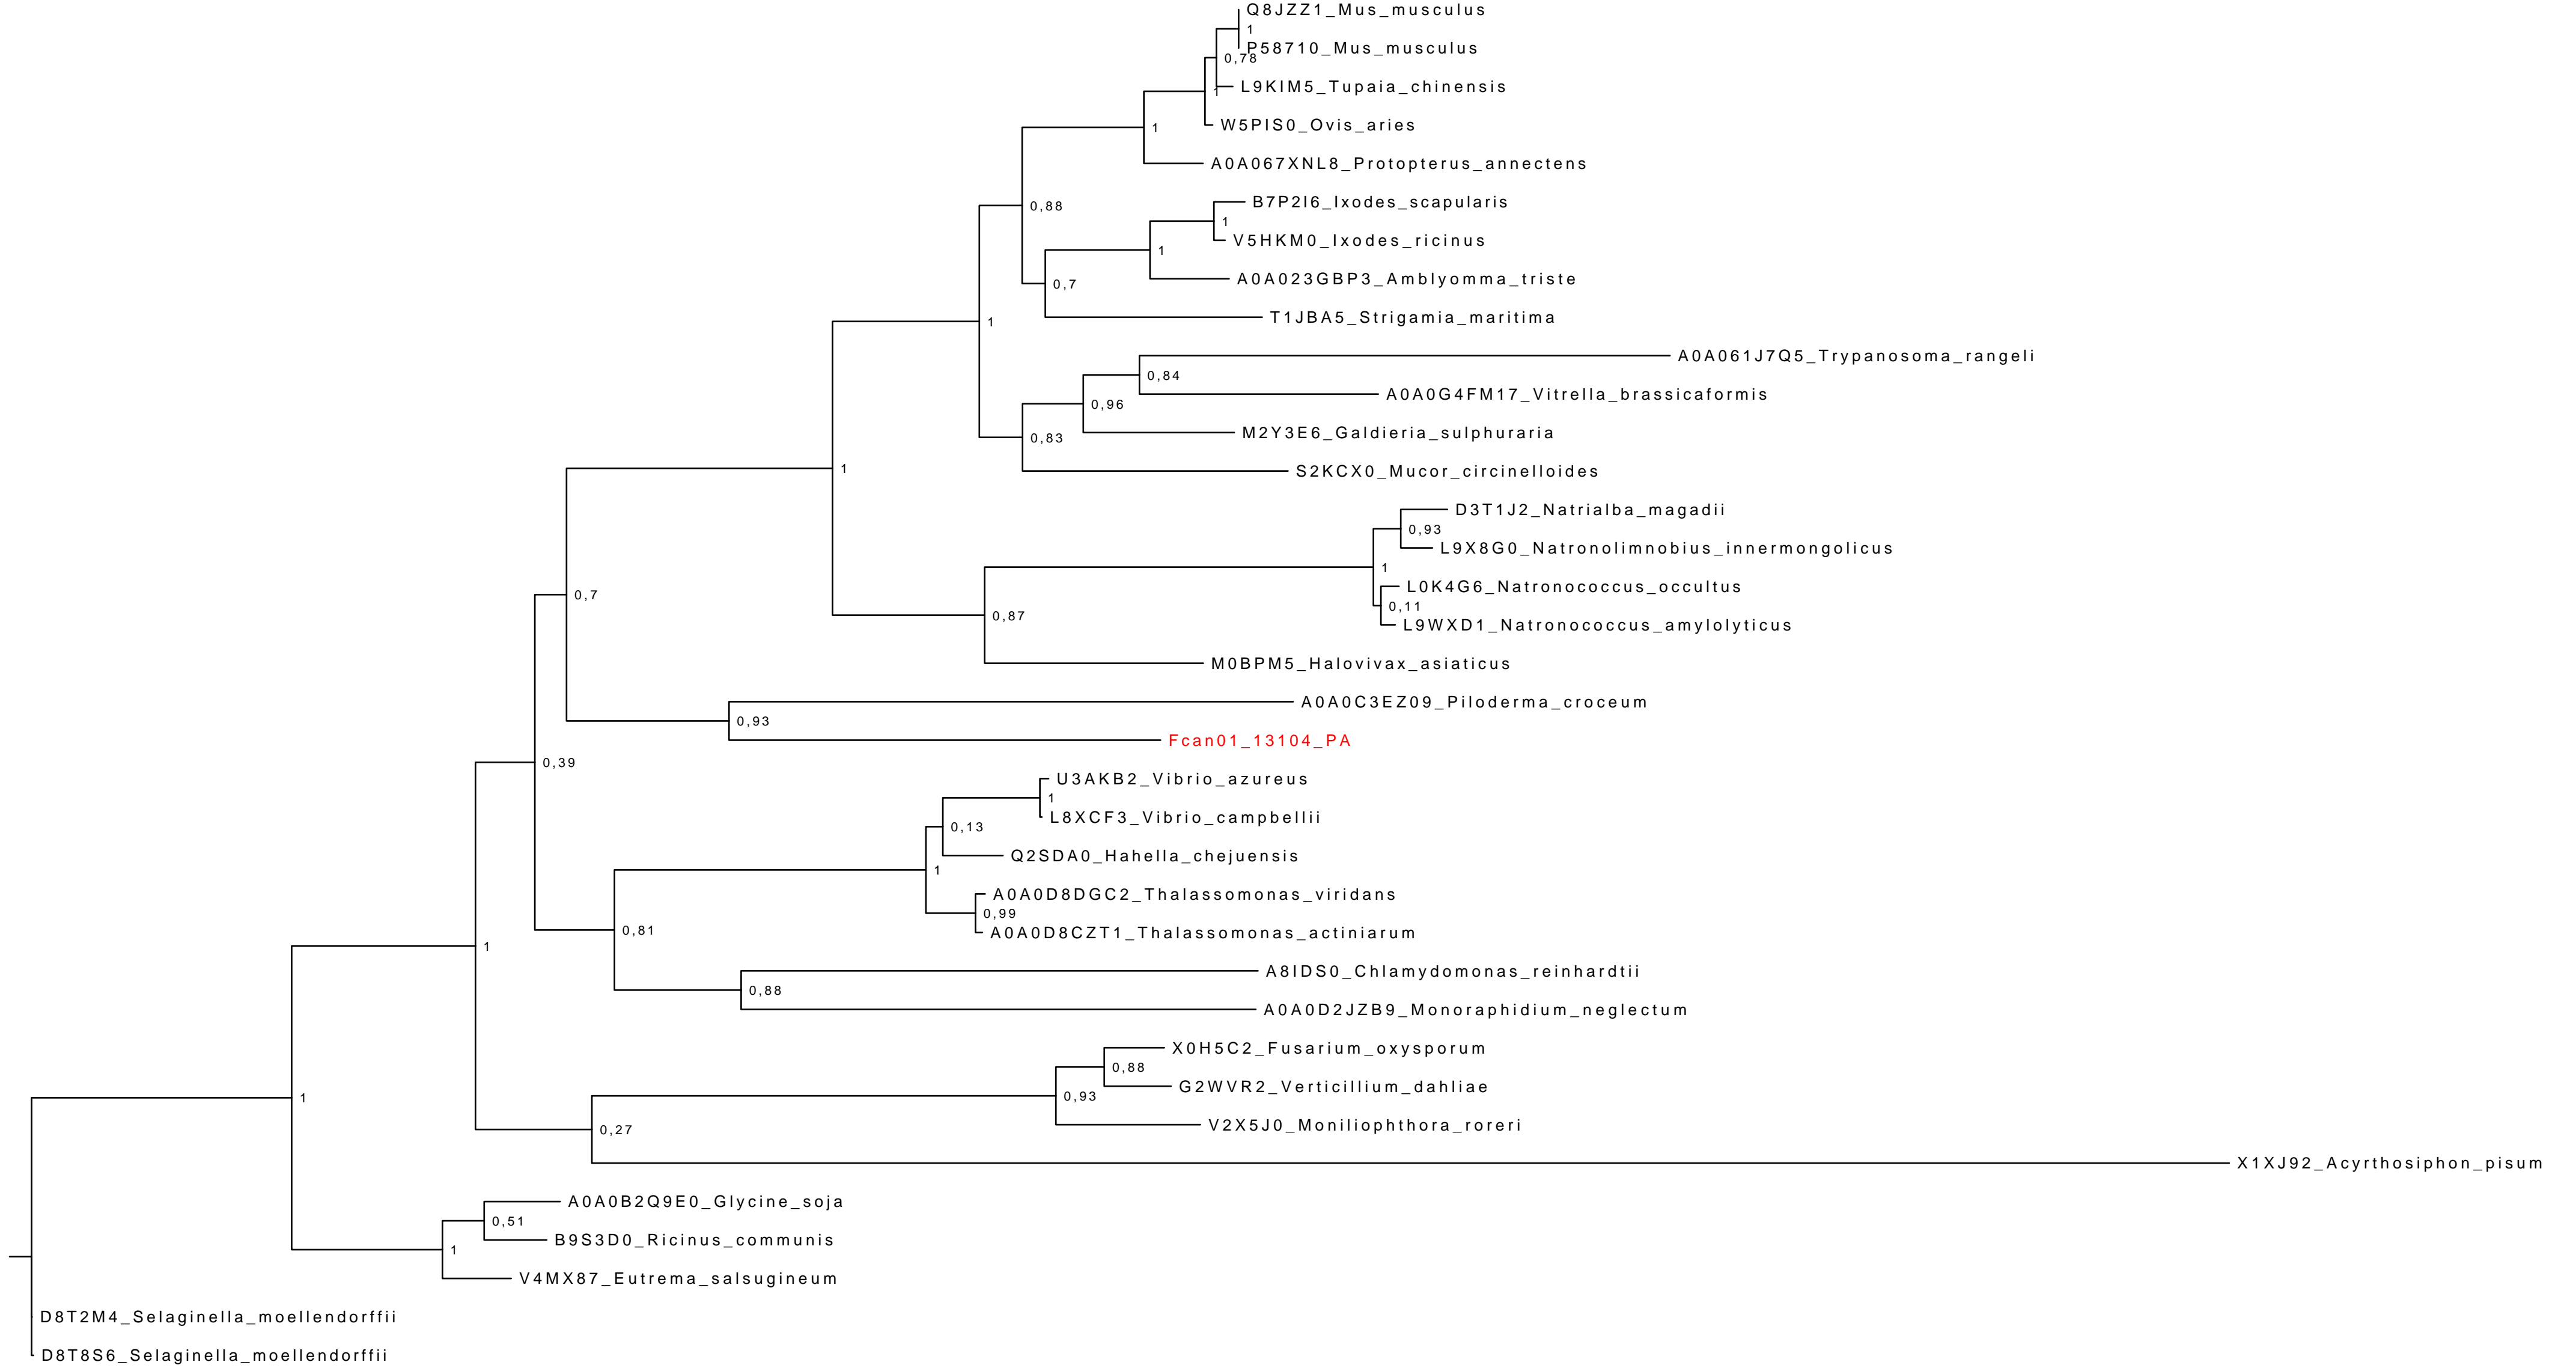

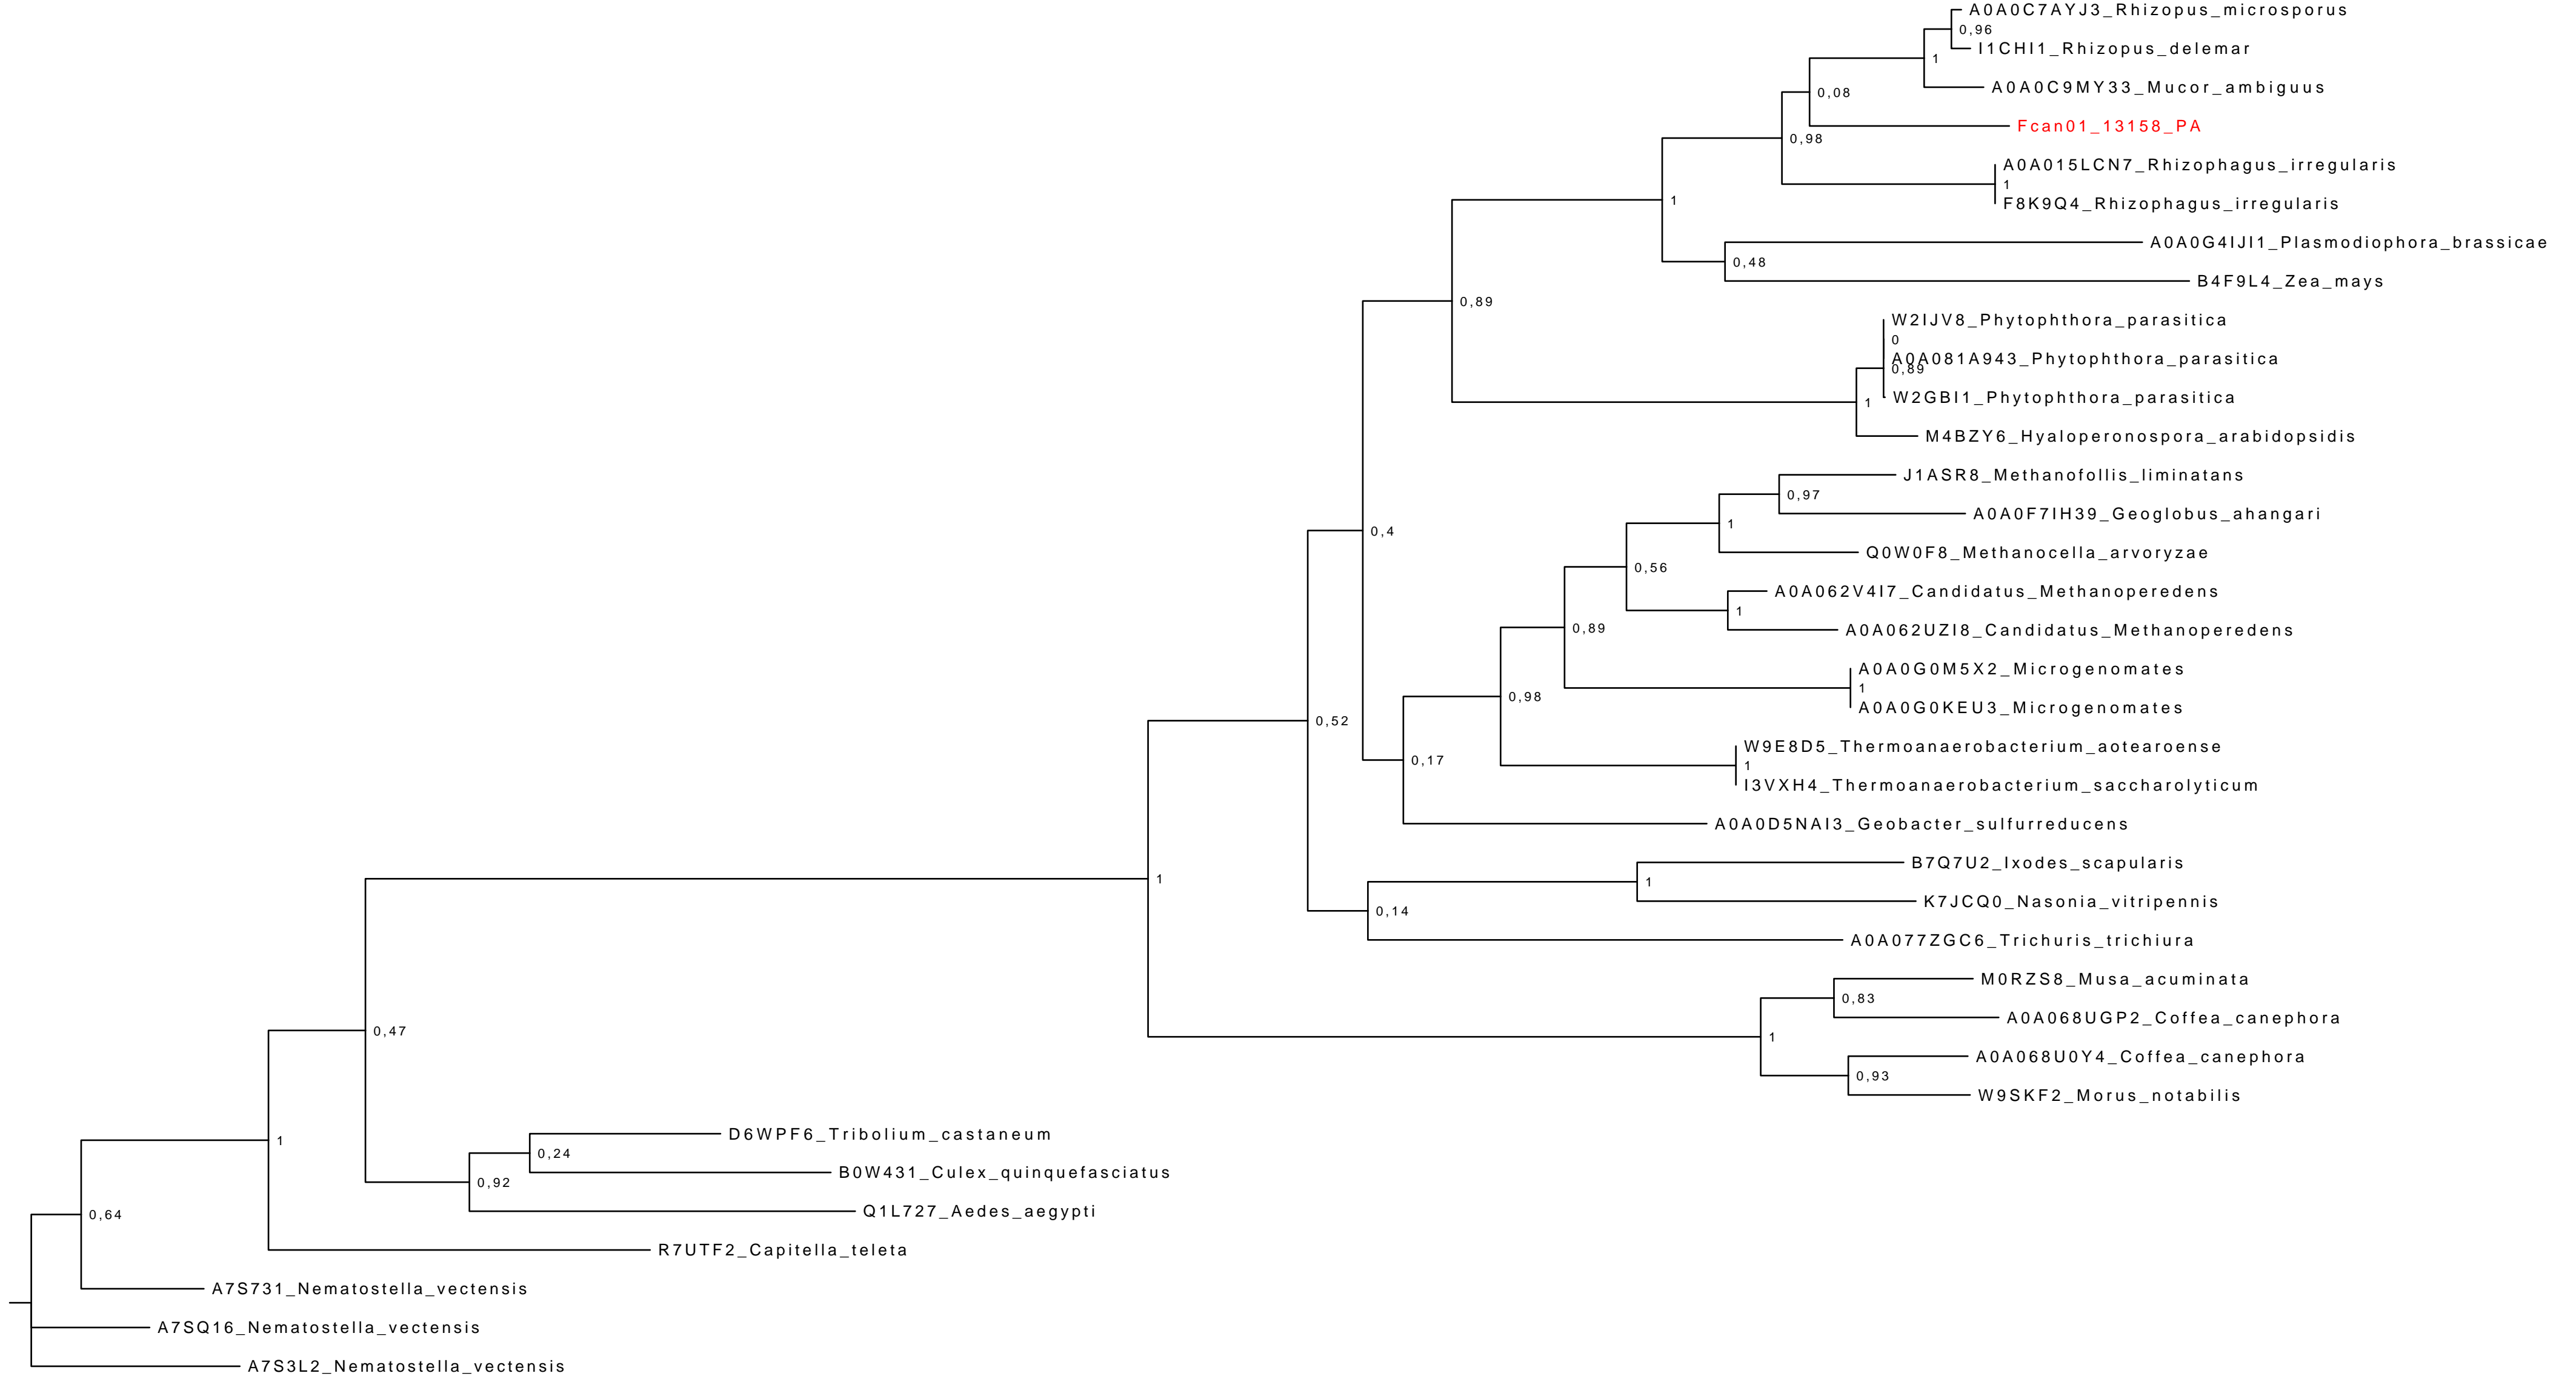

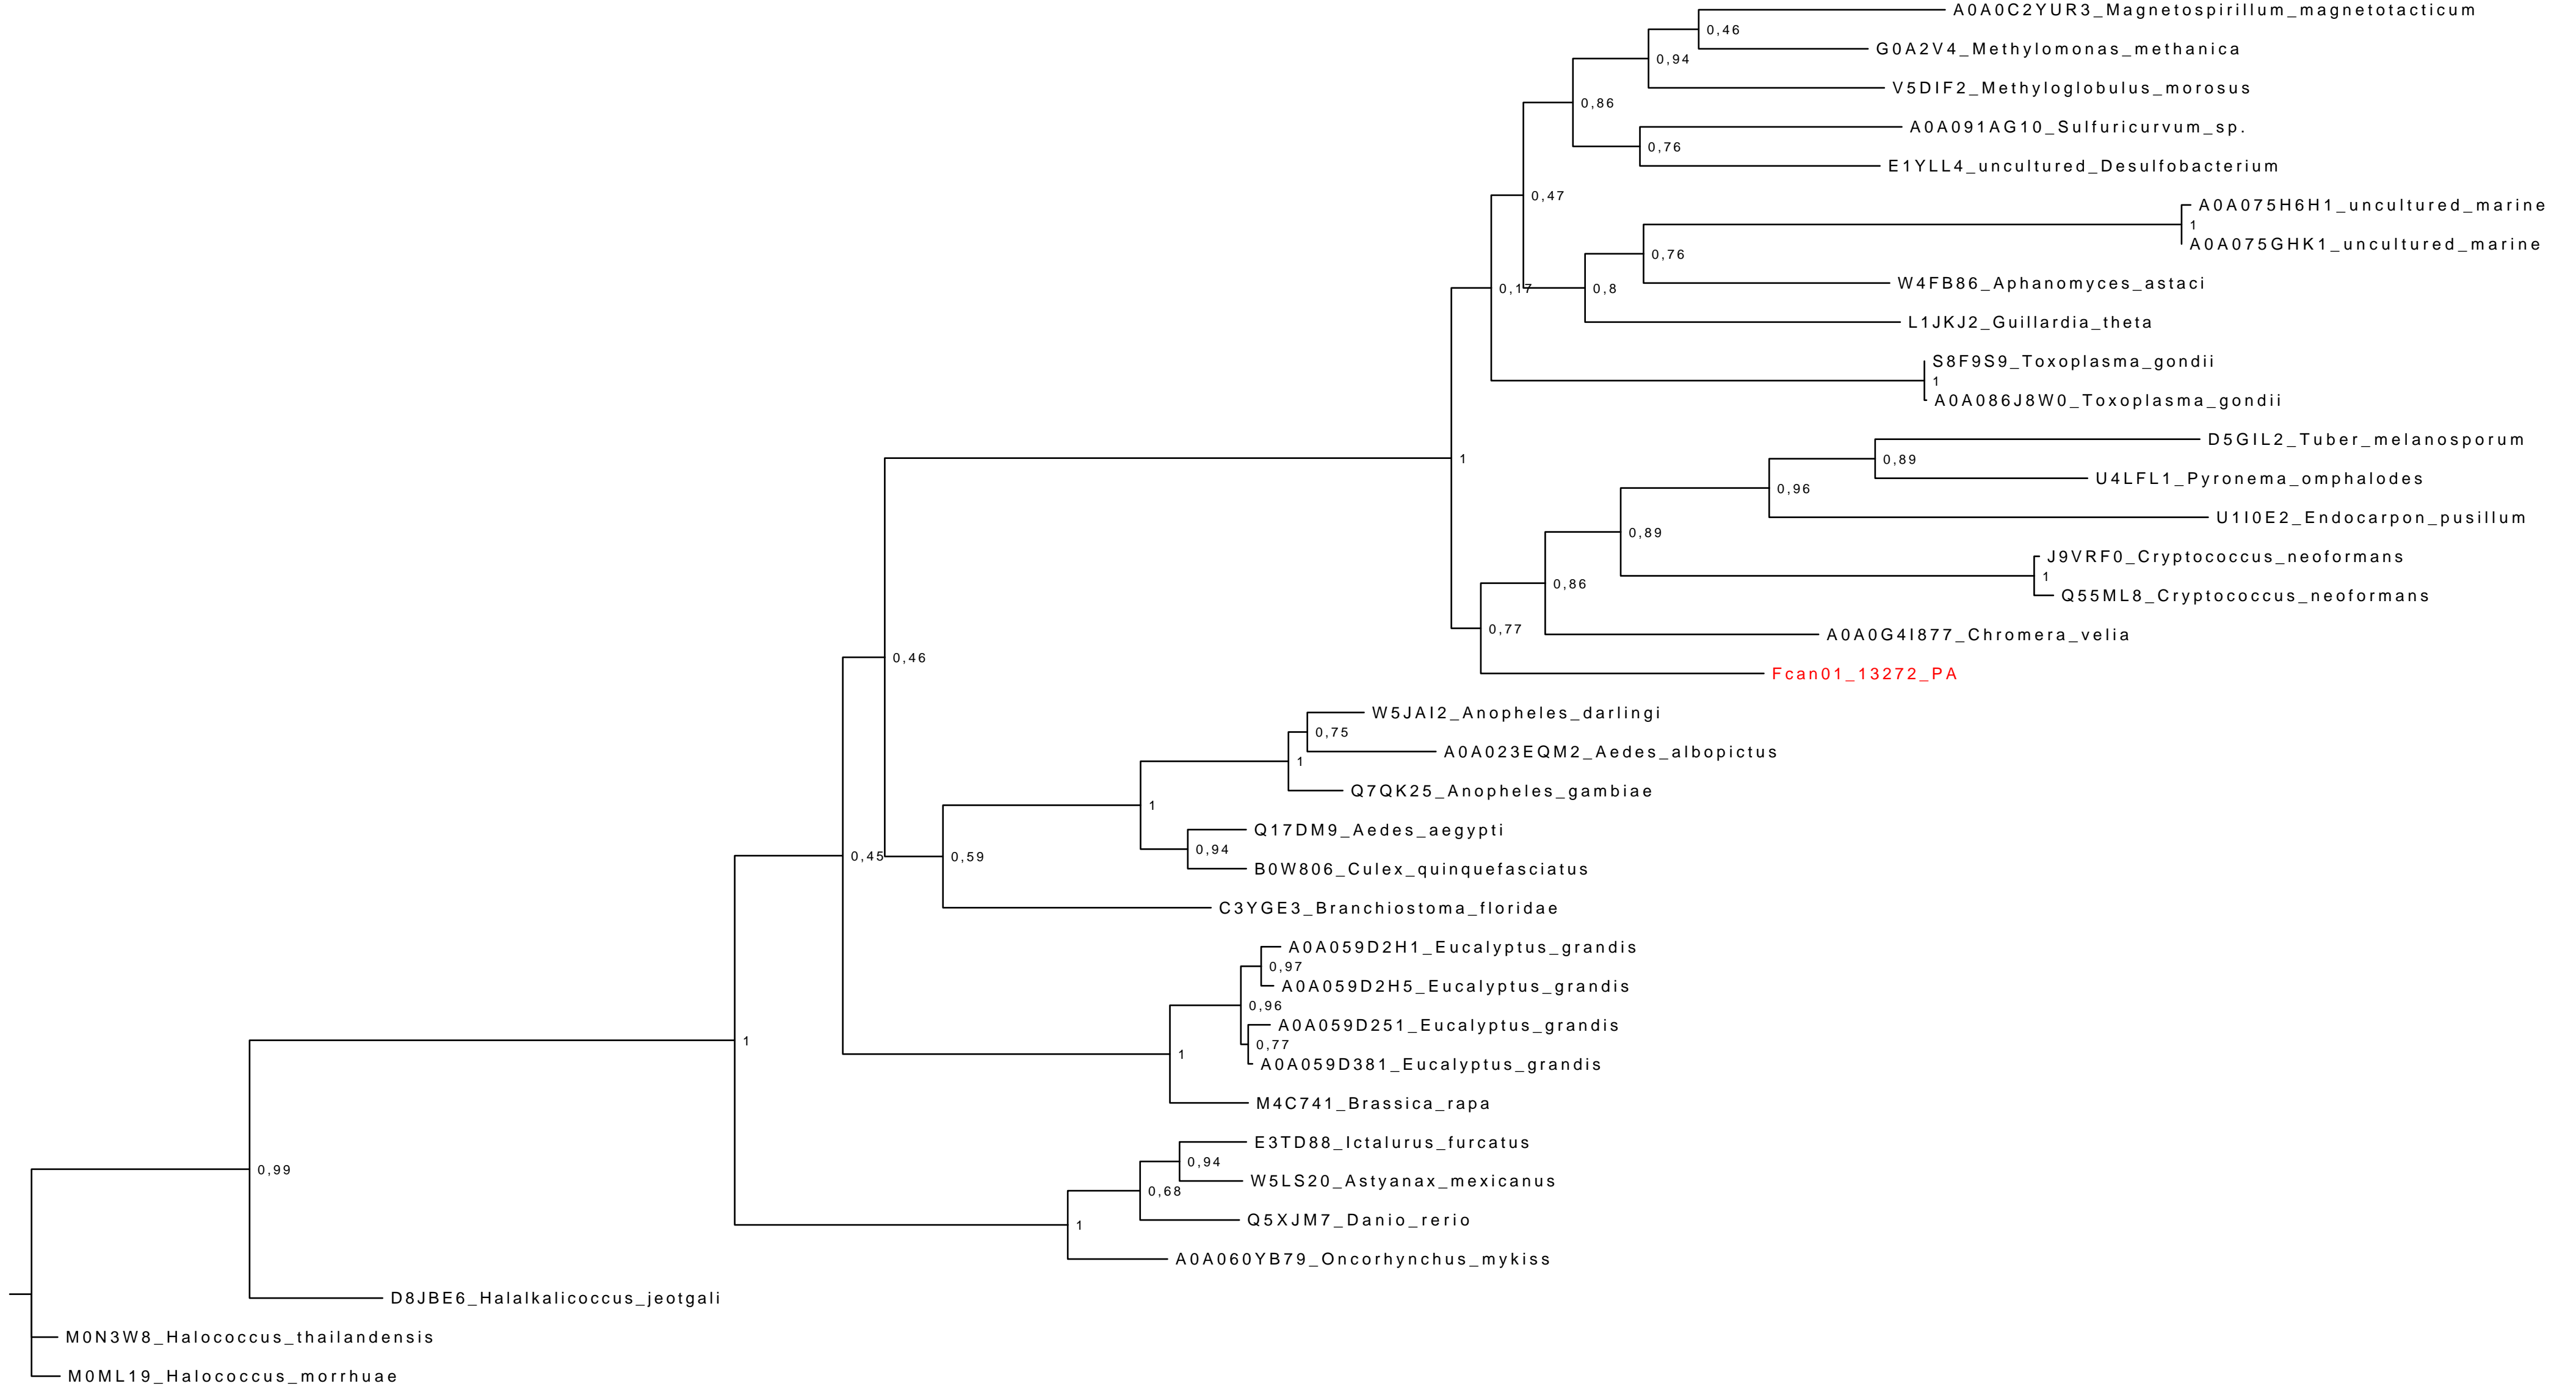

0.4

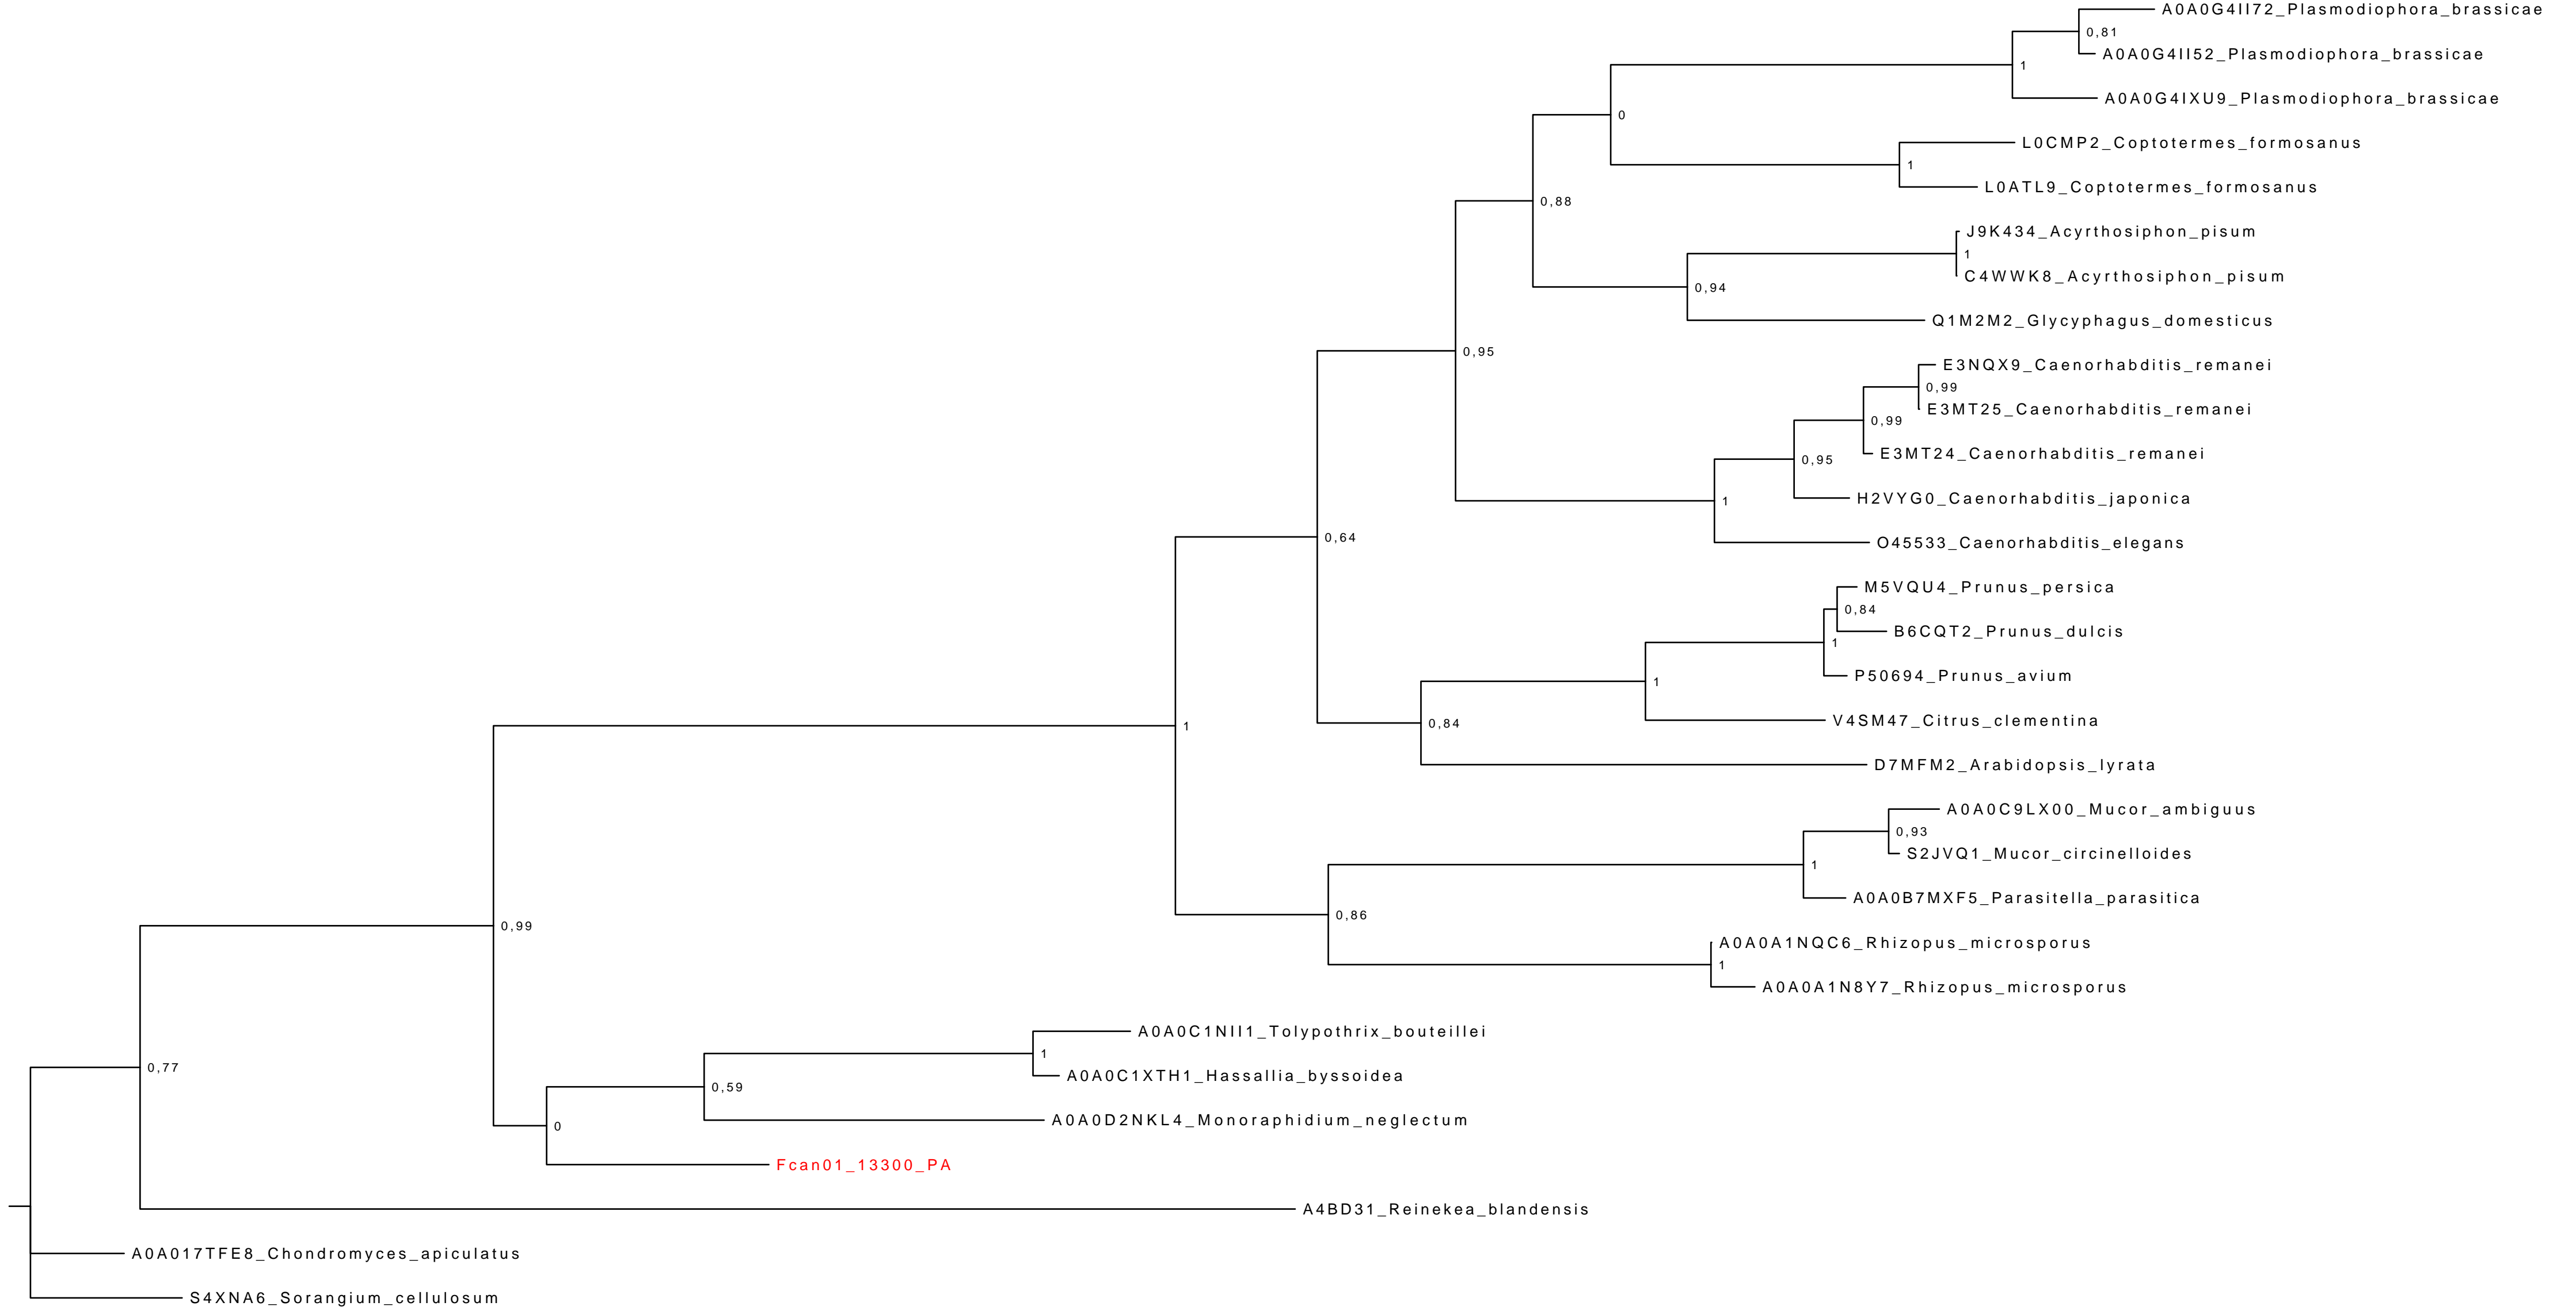

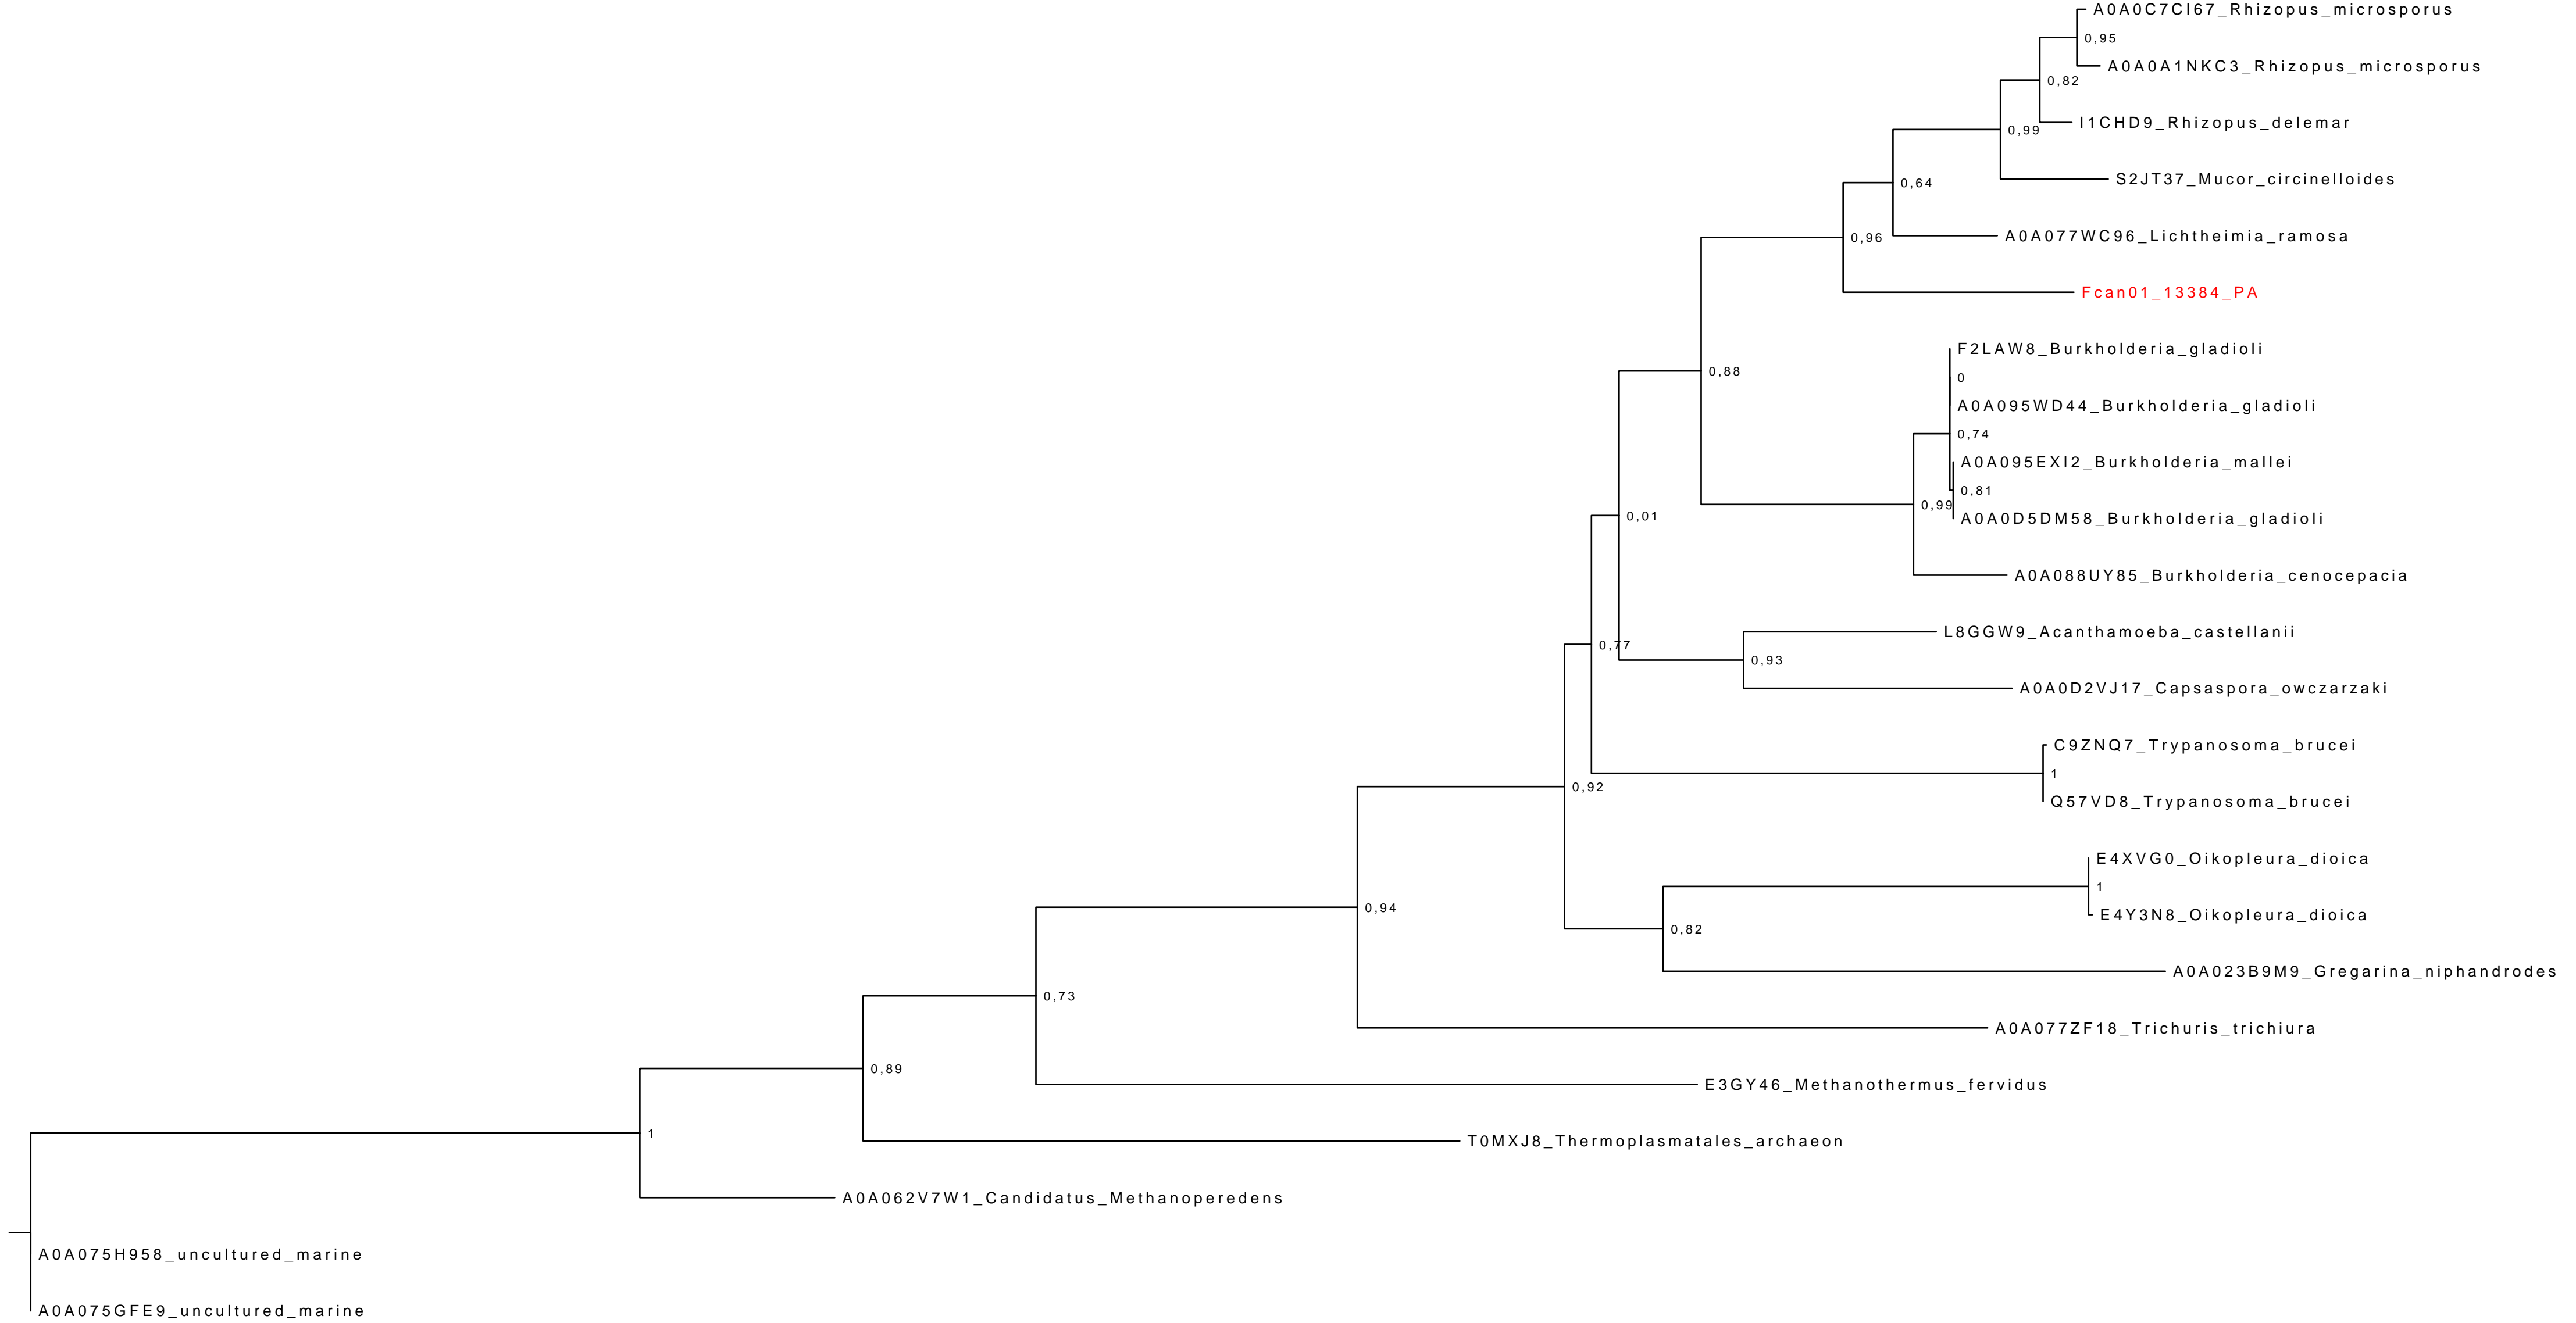



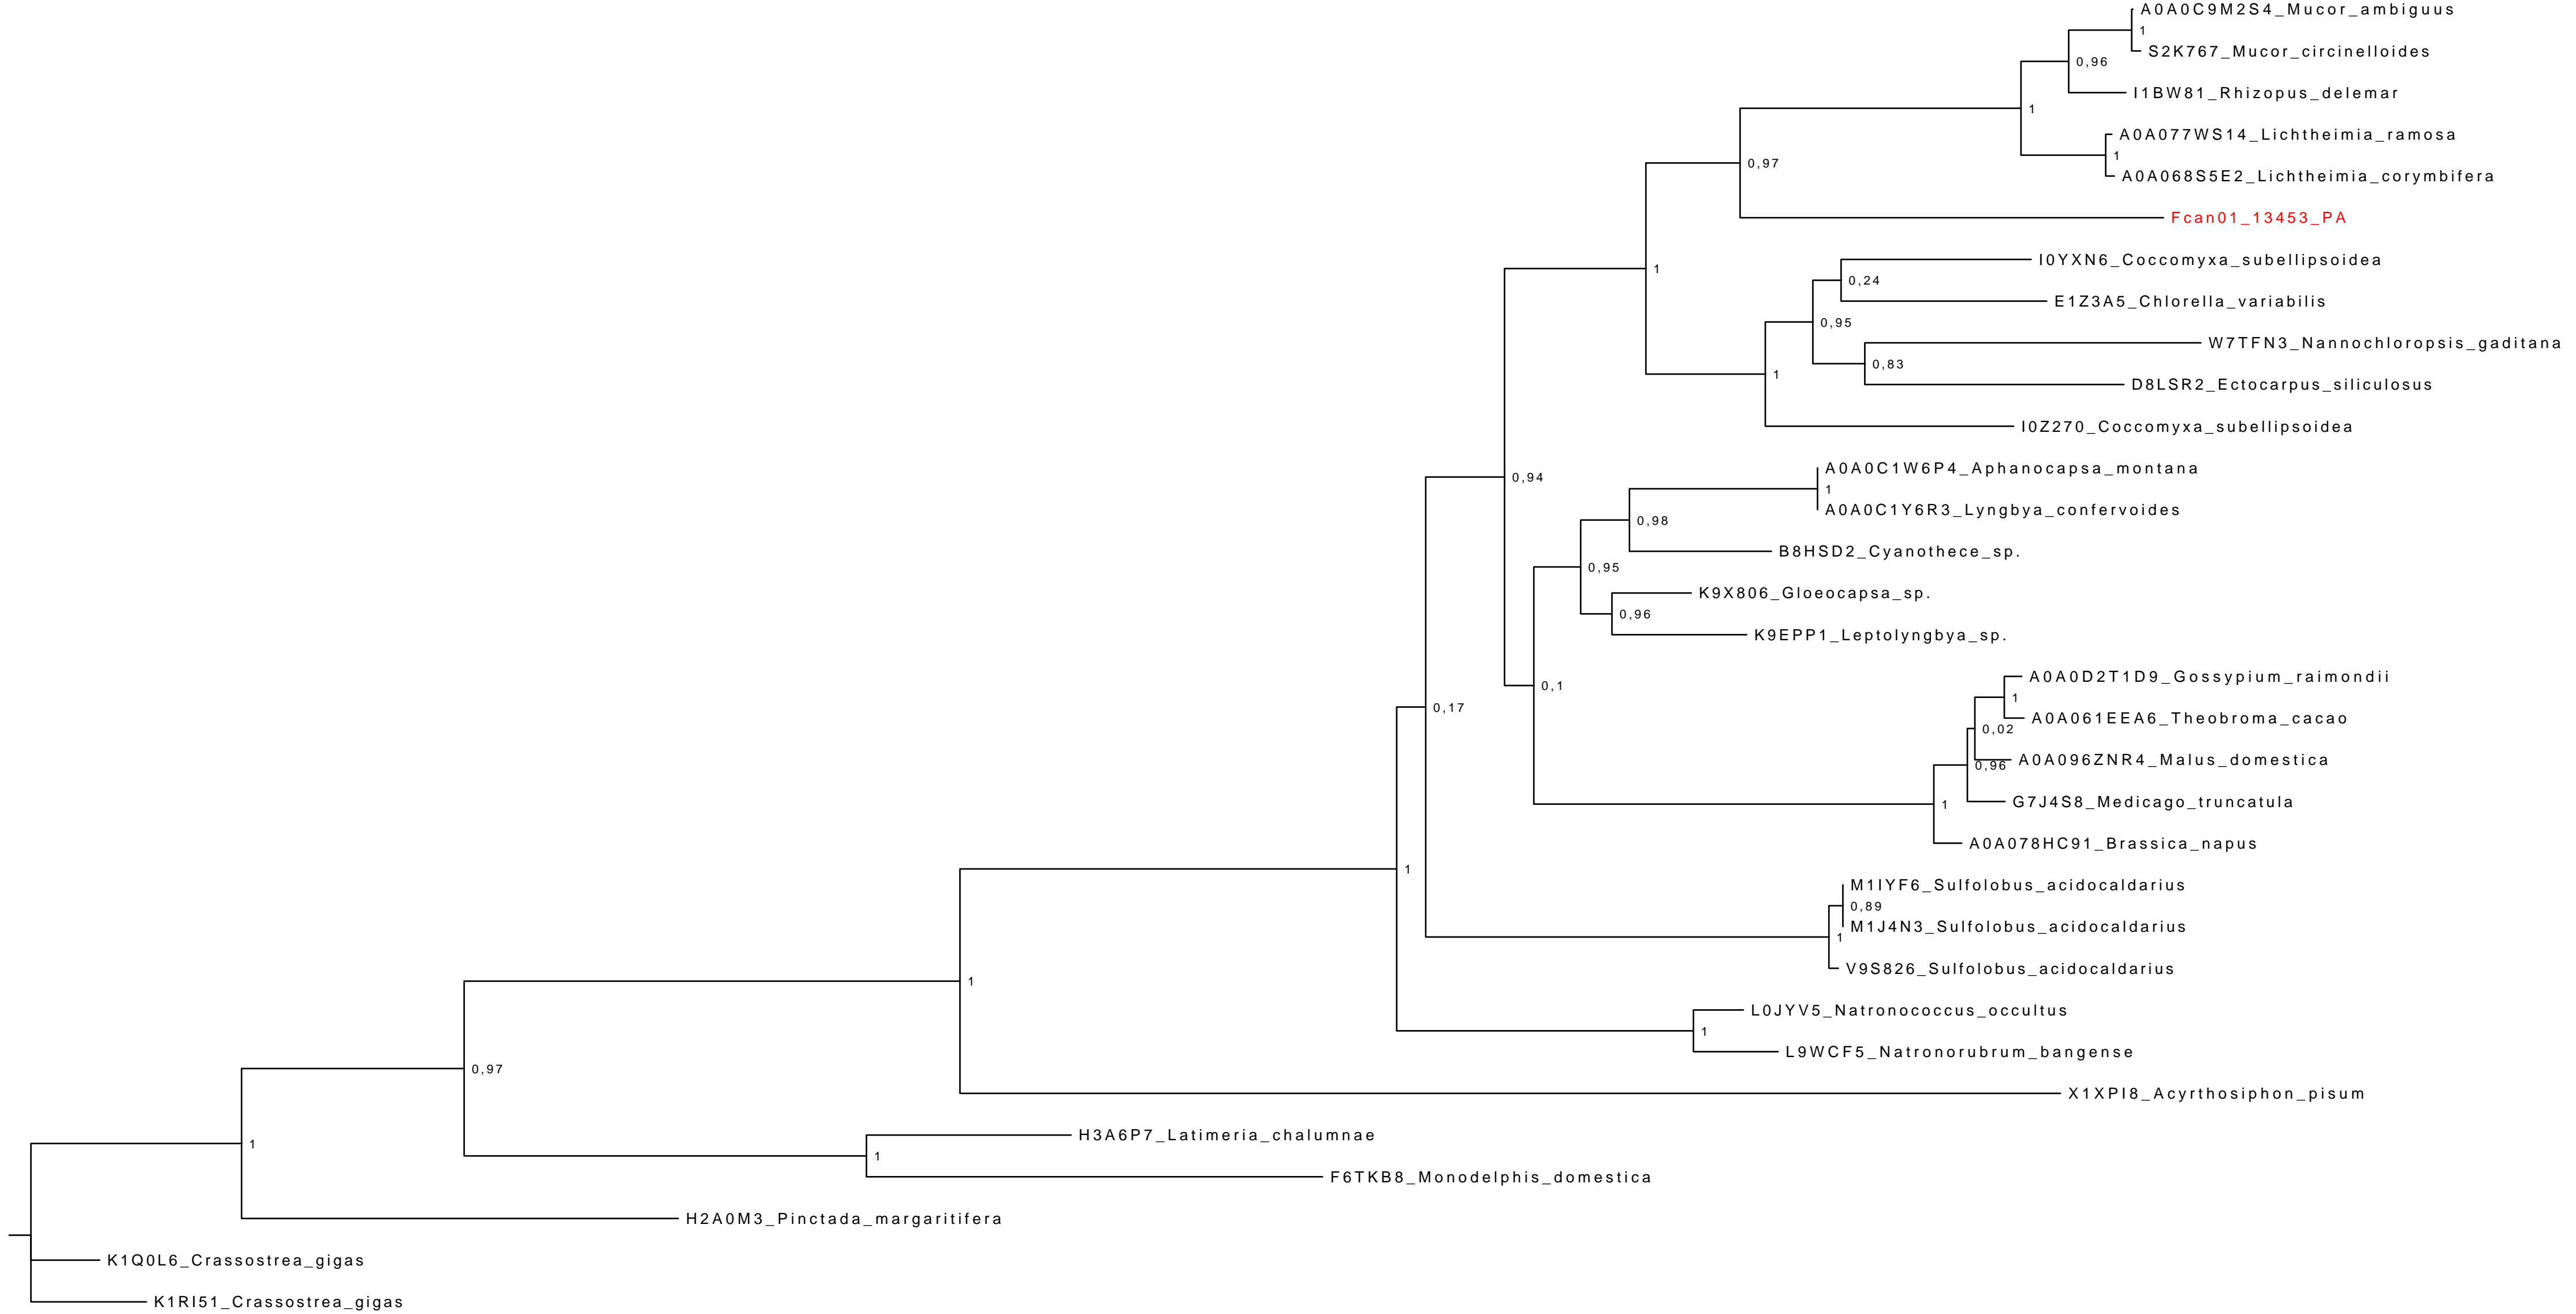

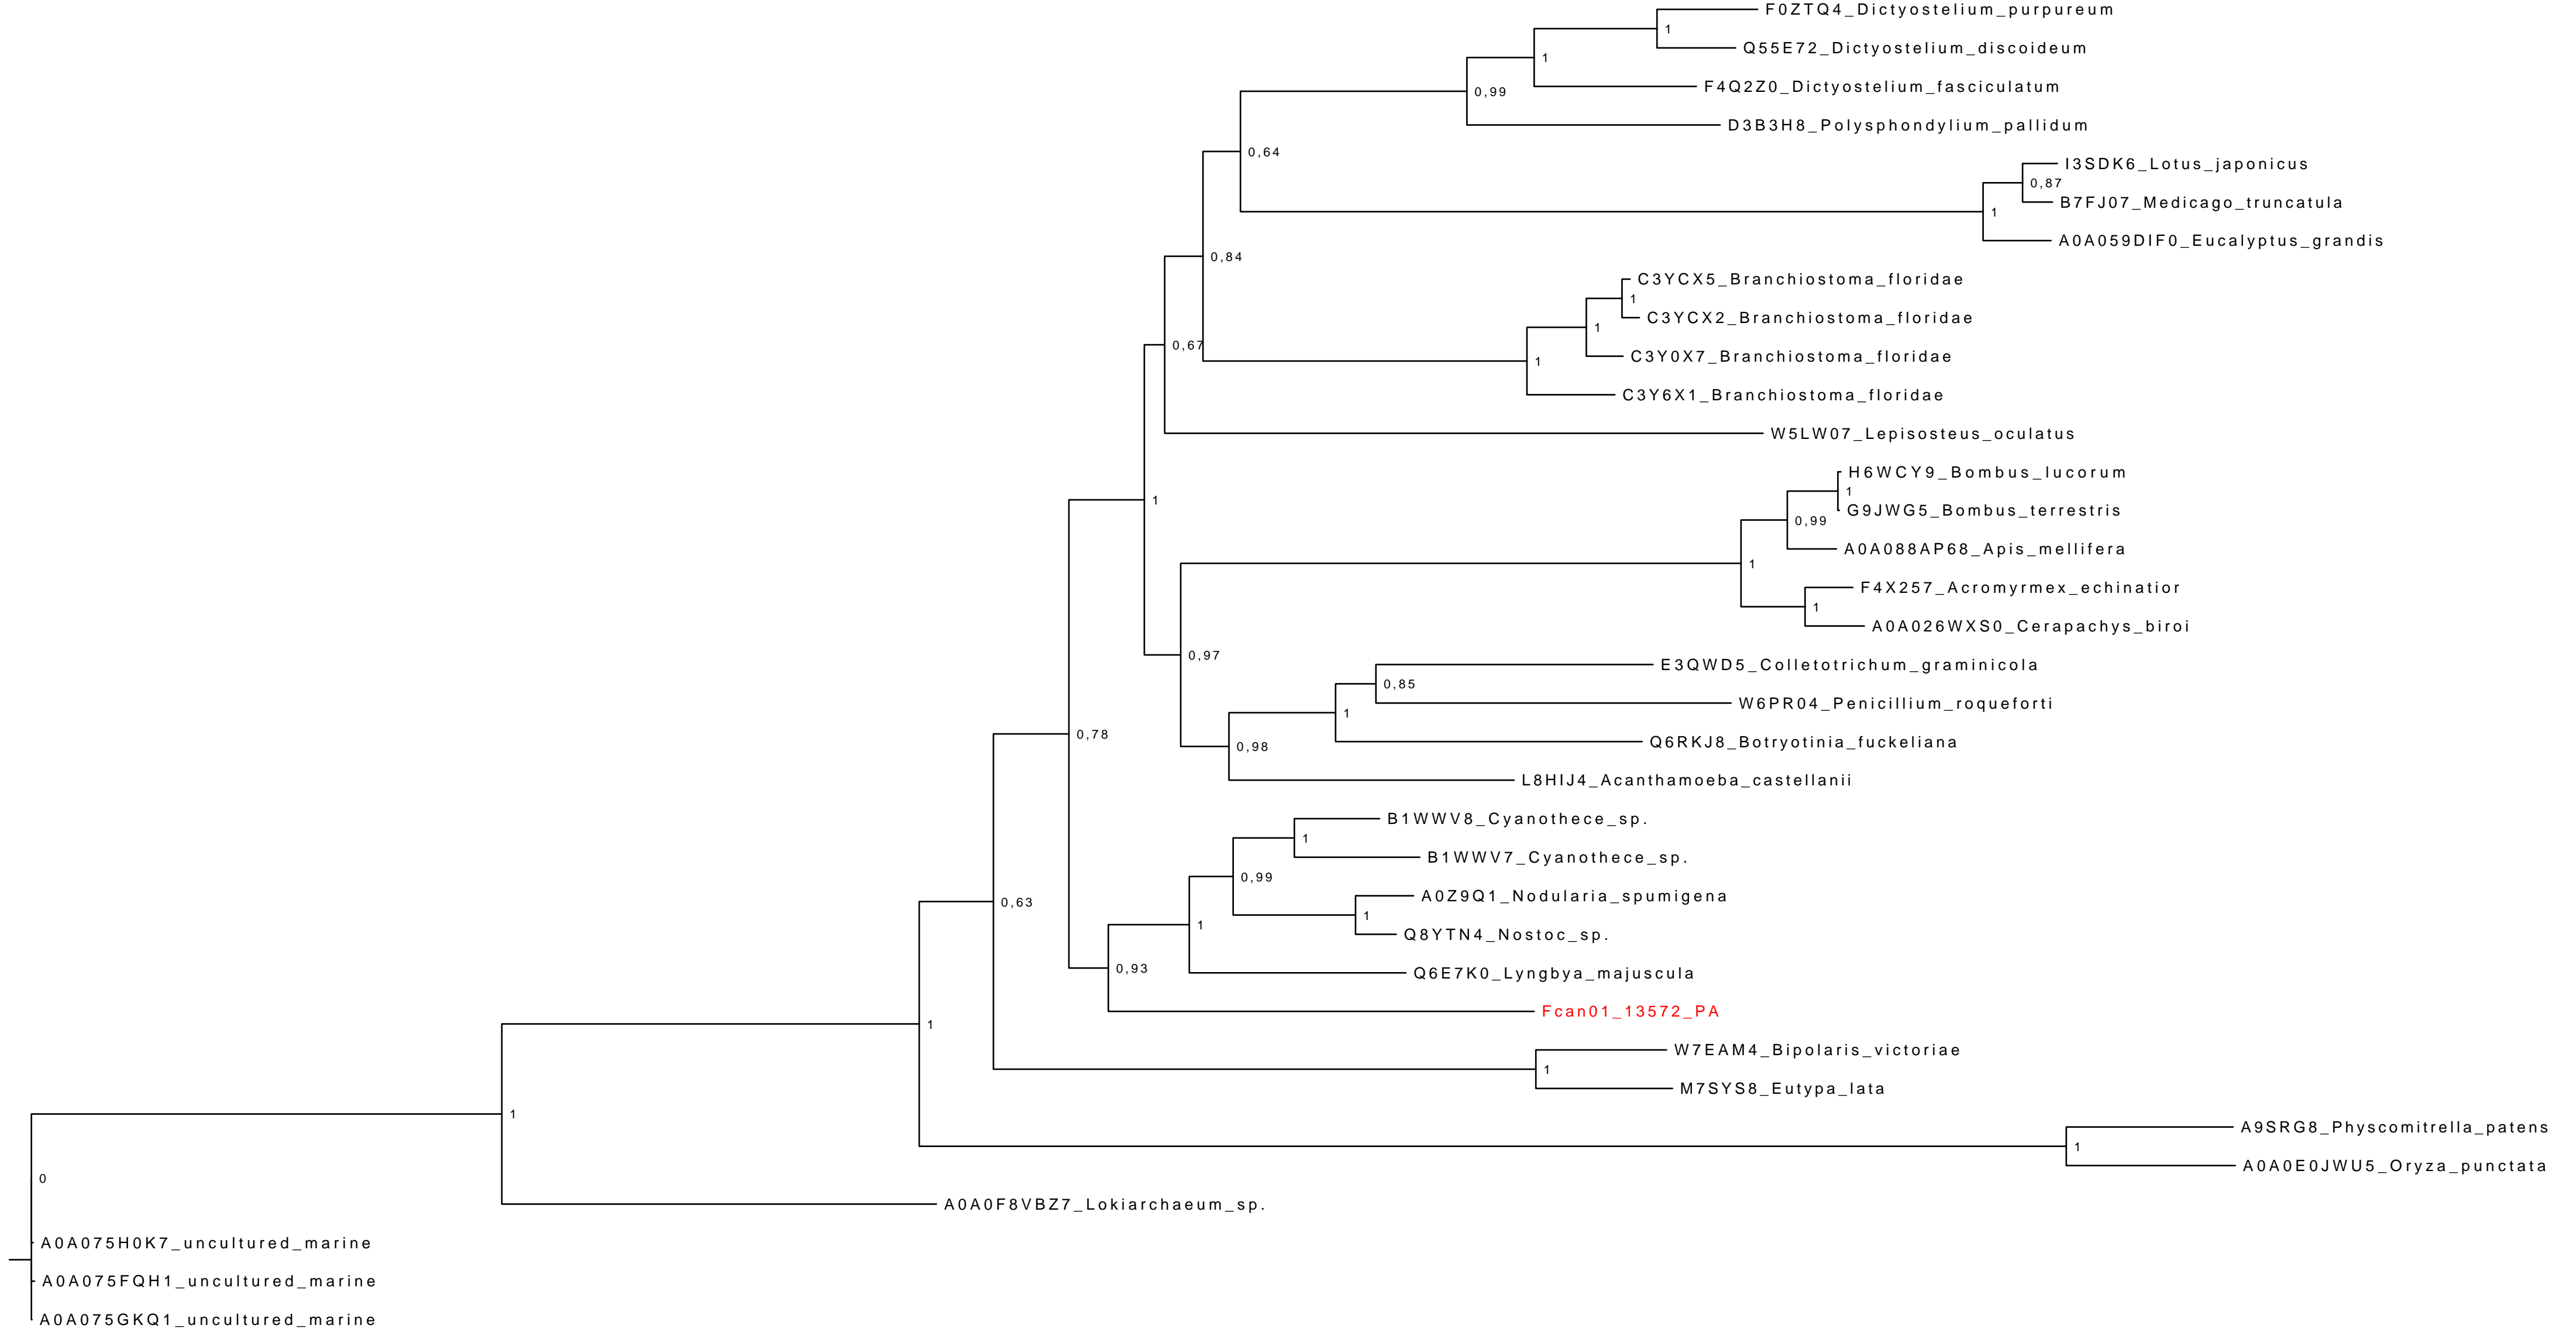

0.7

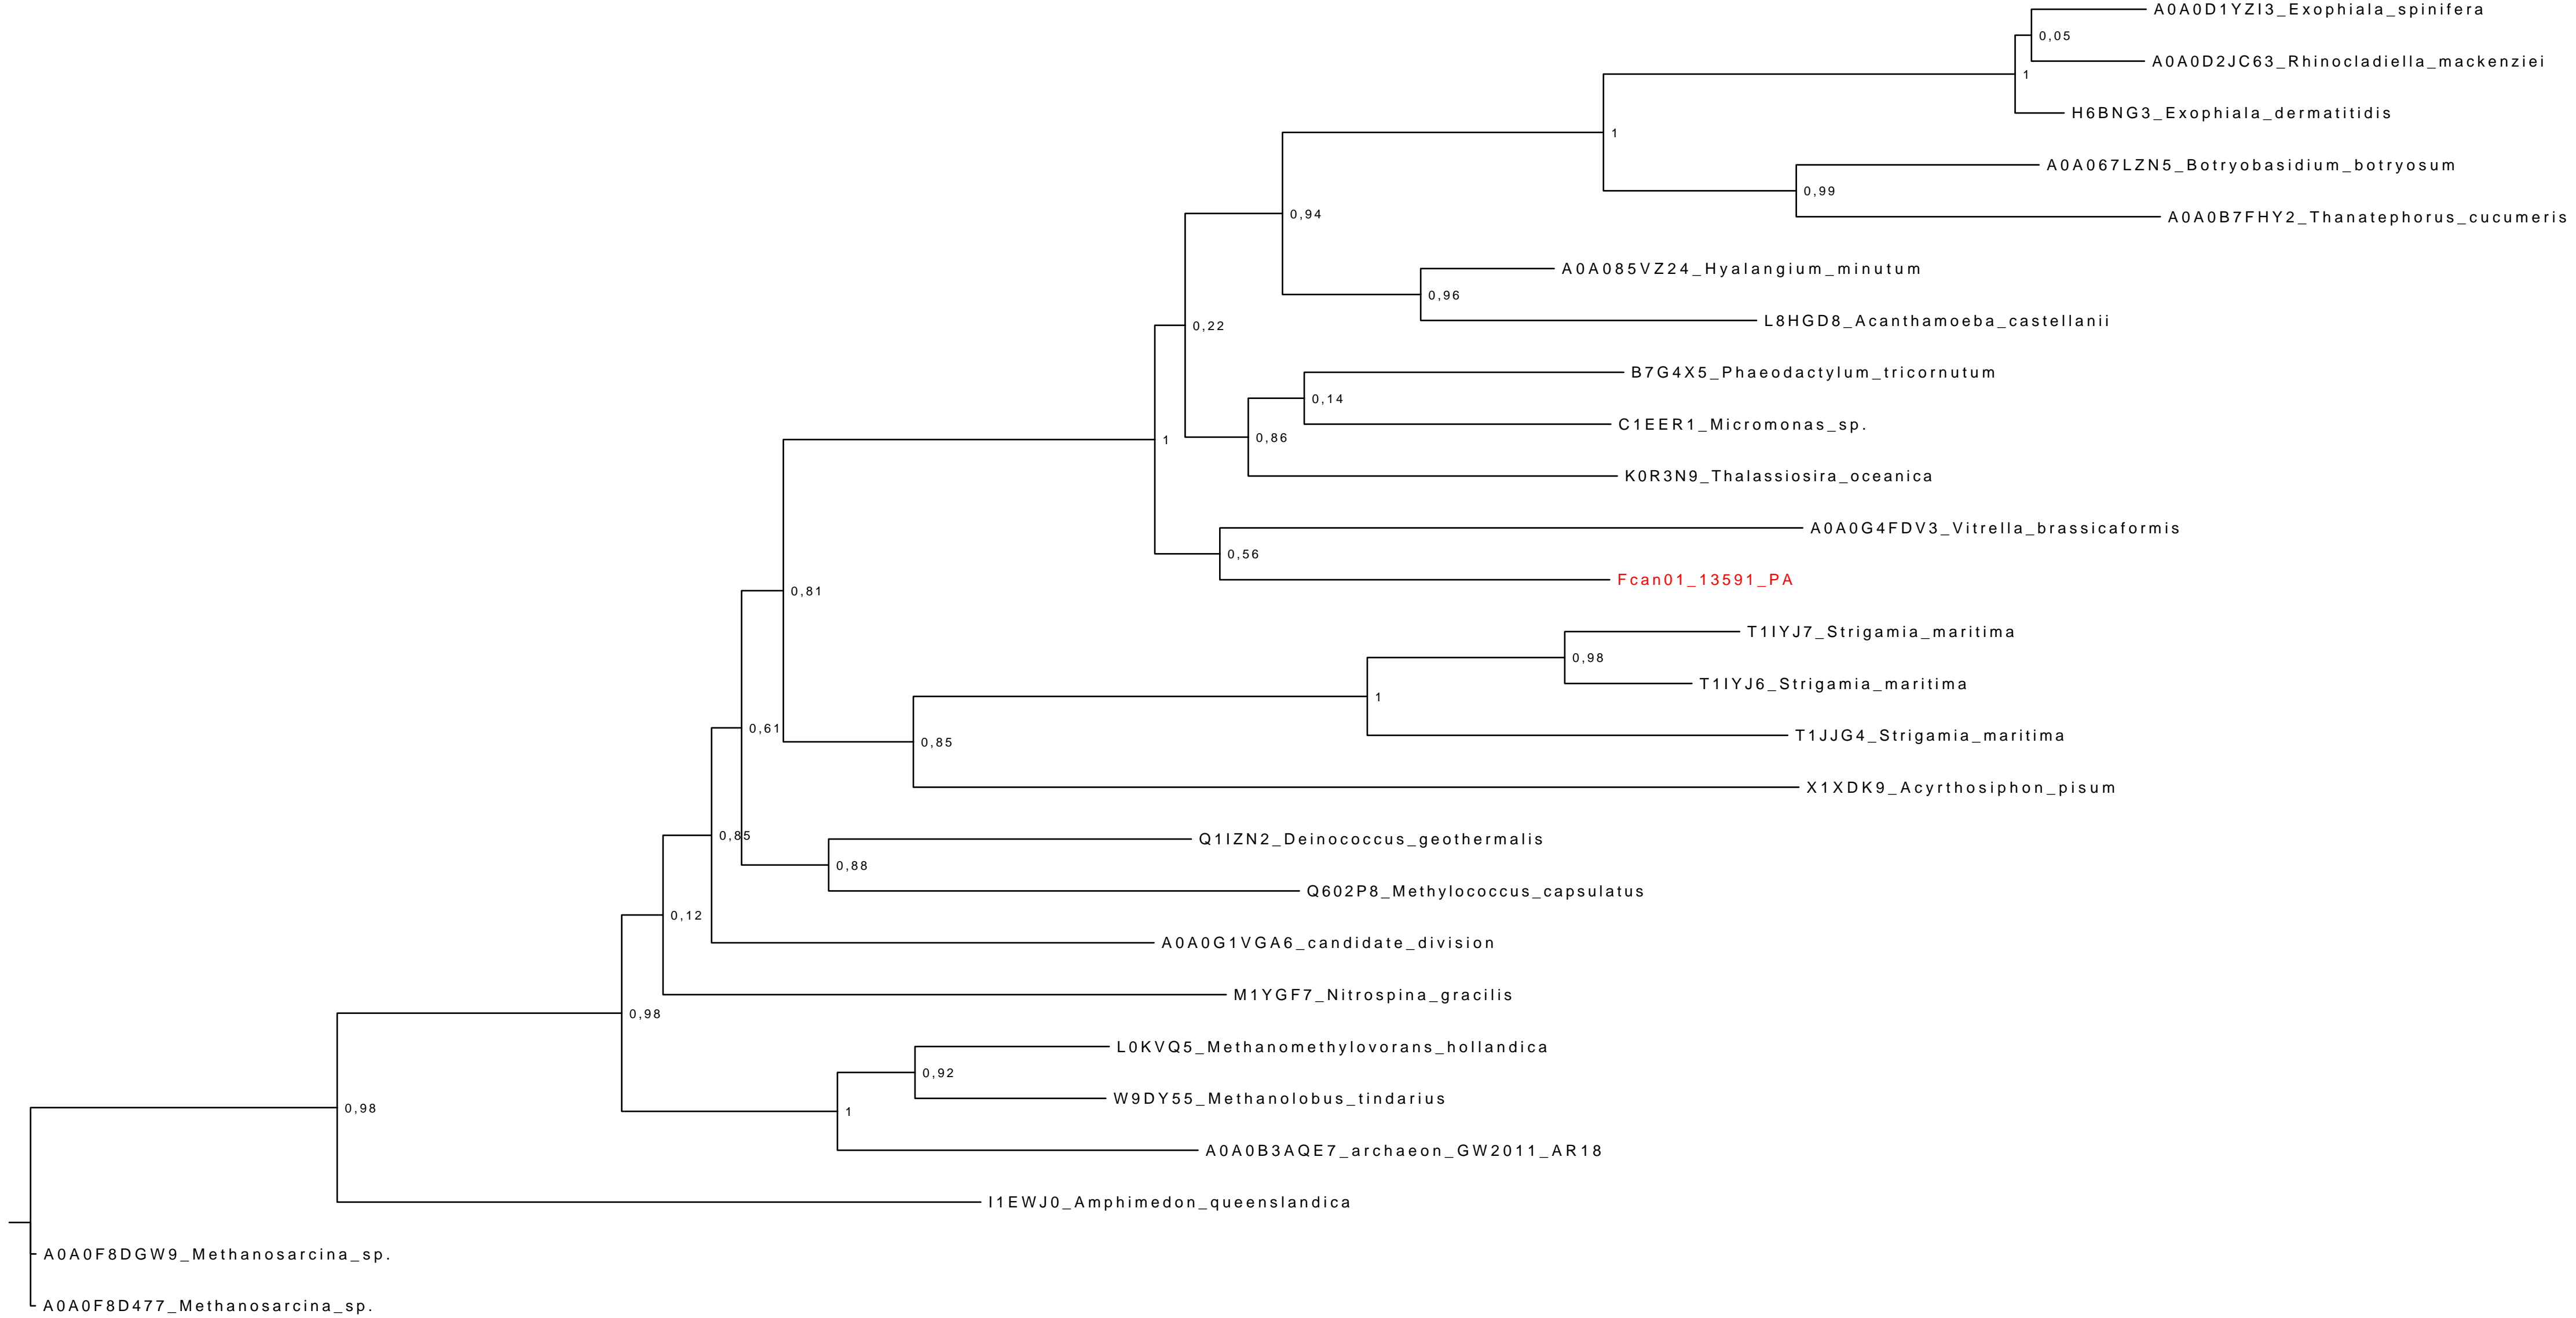

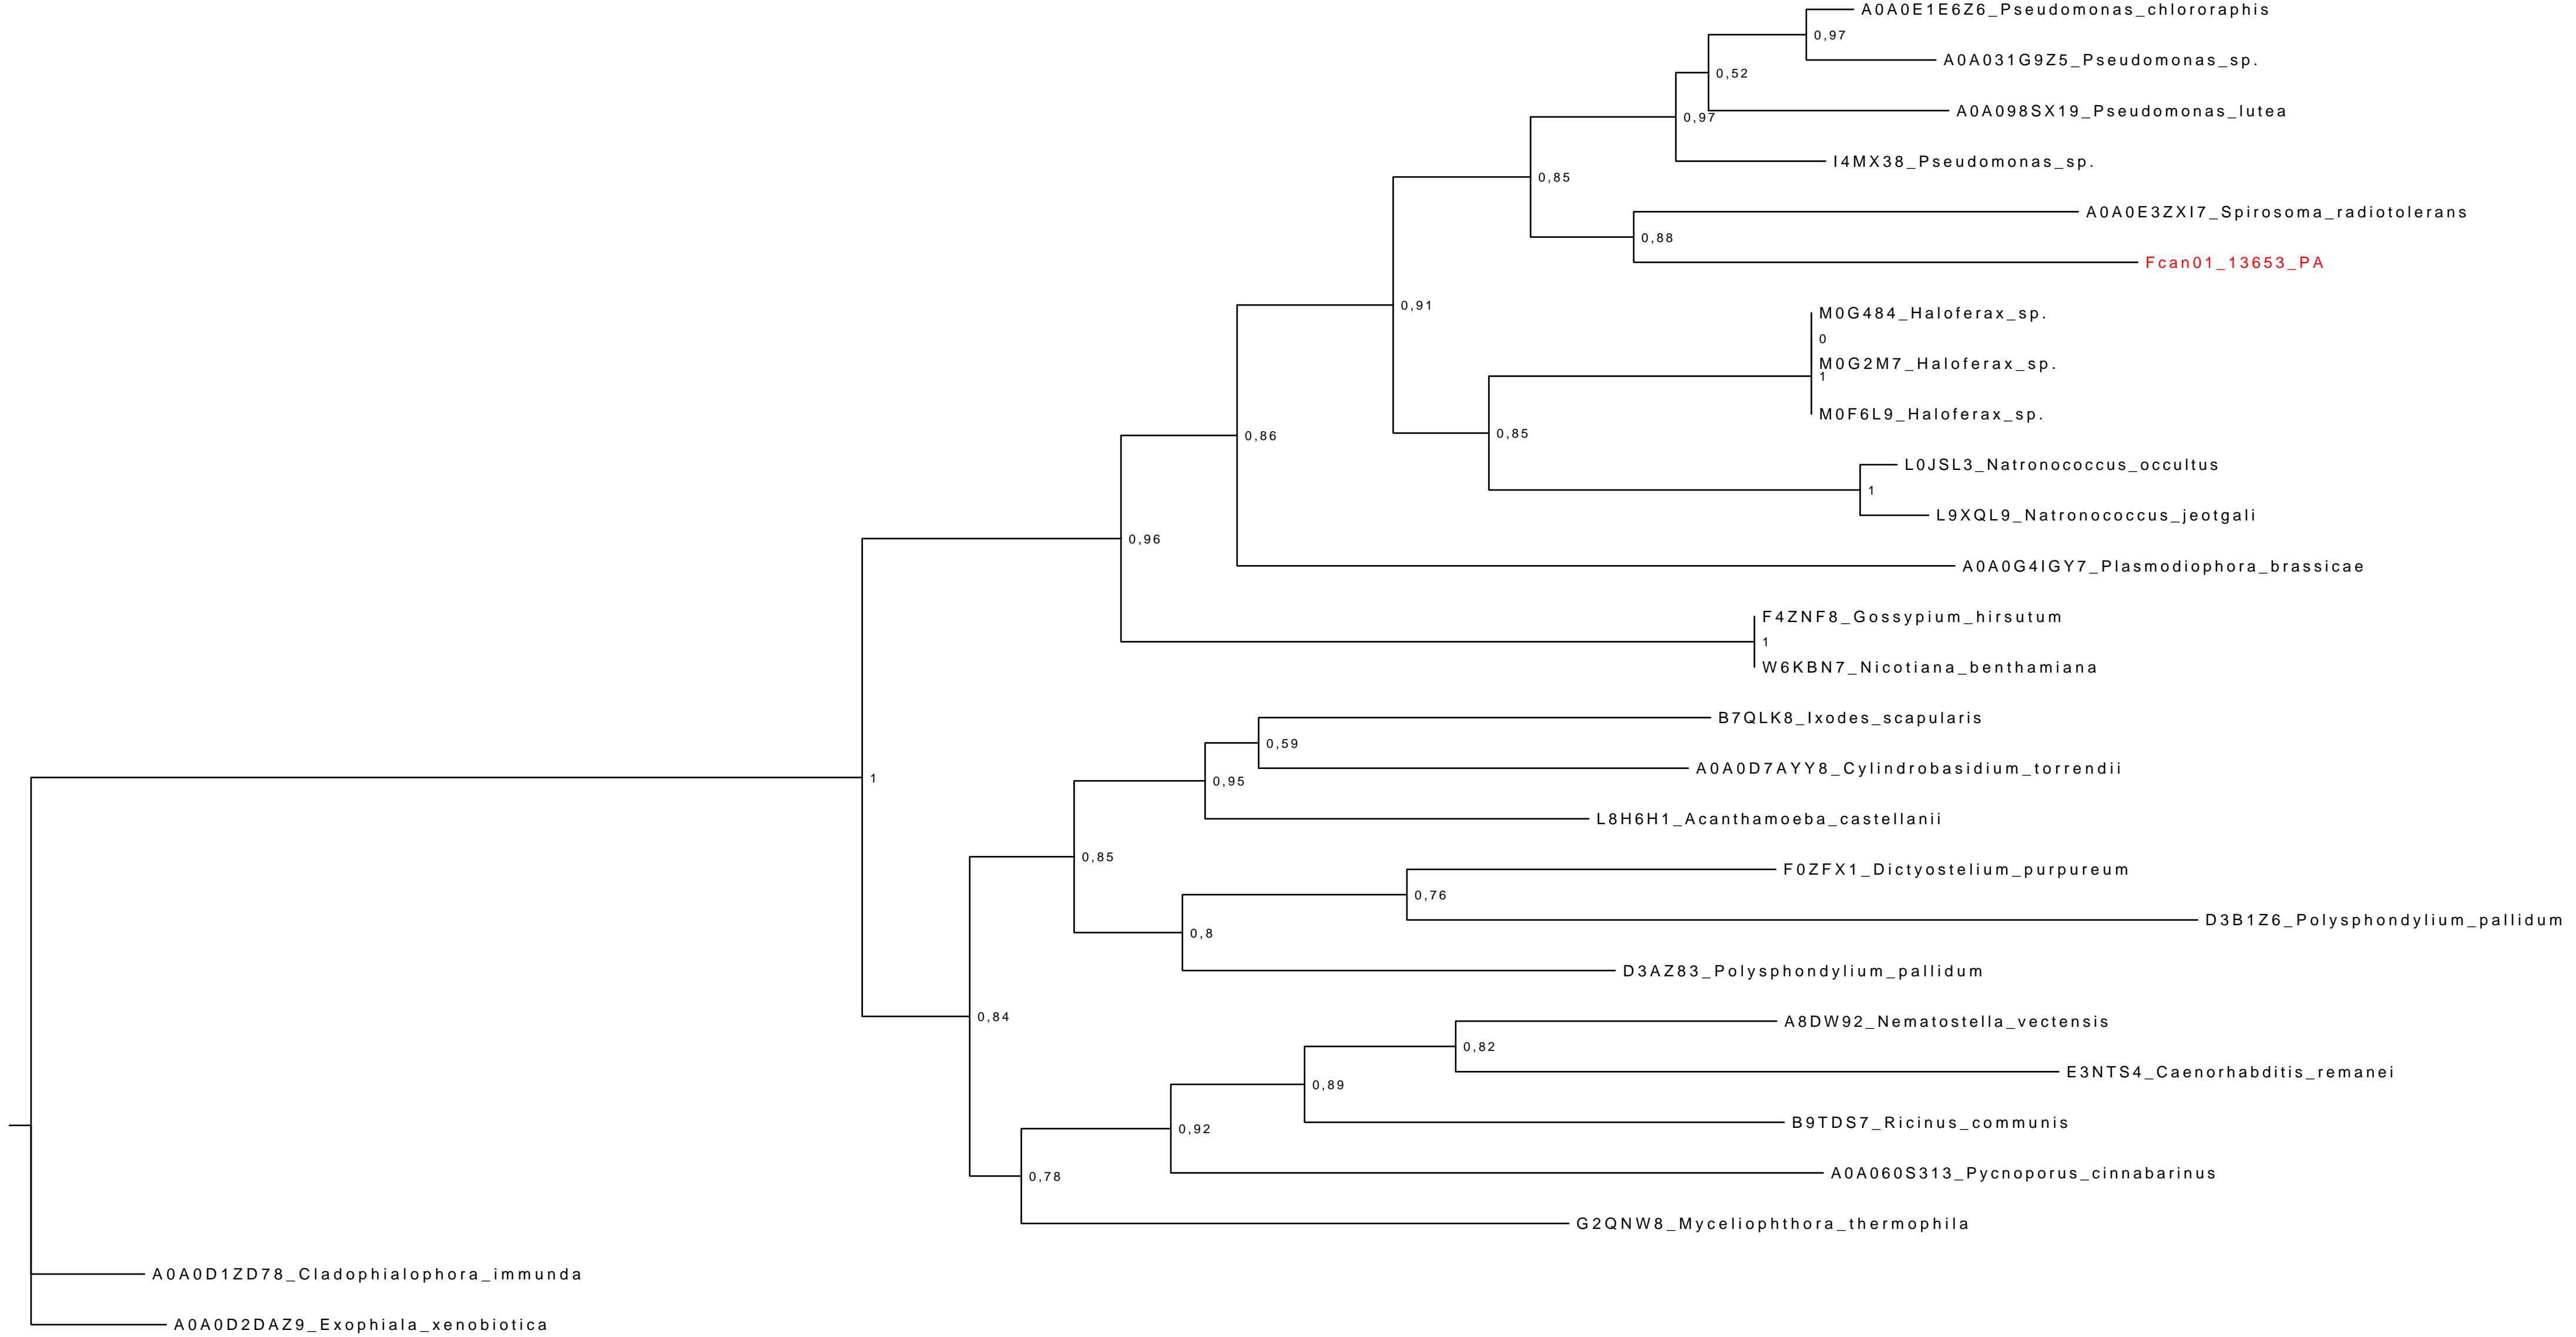

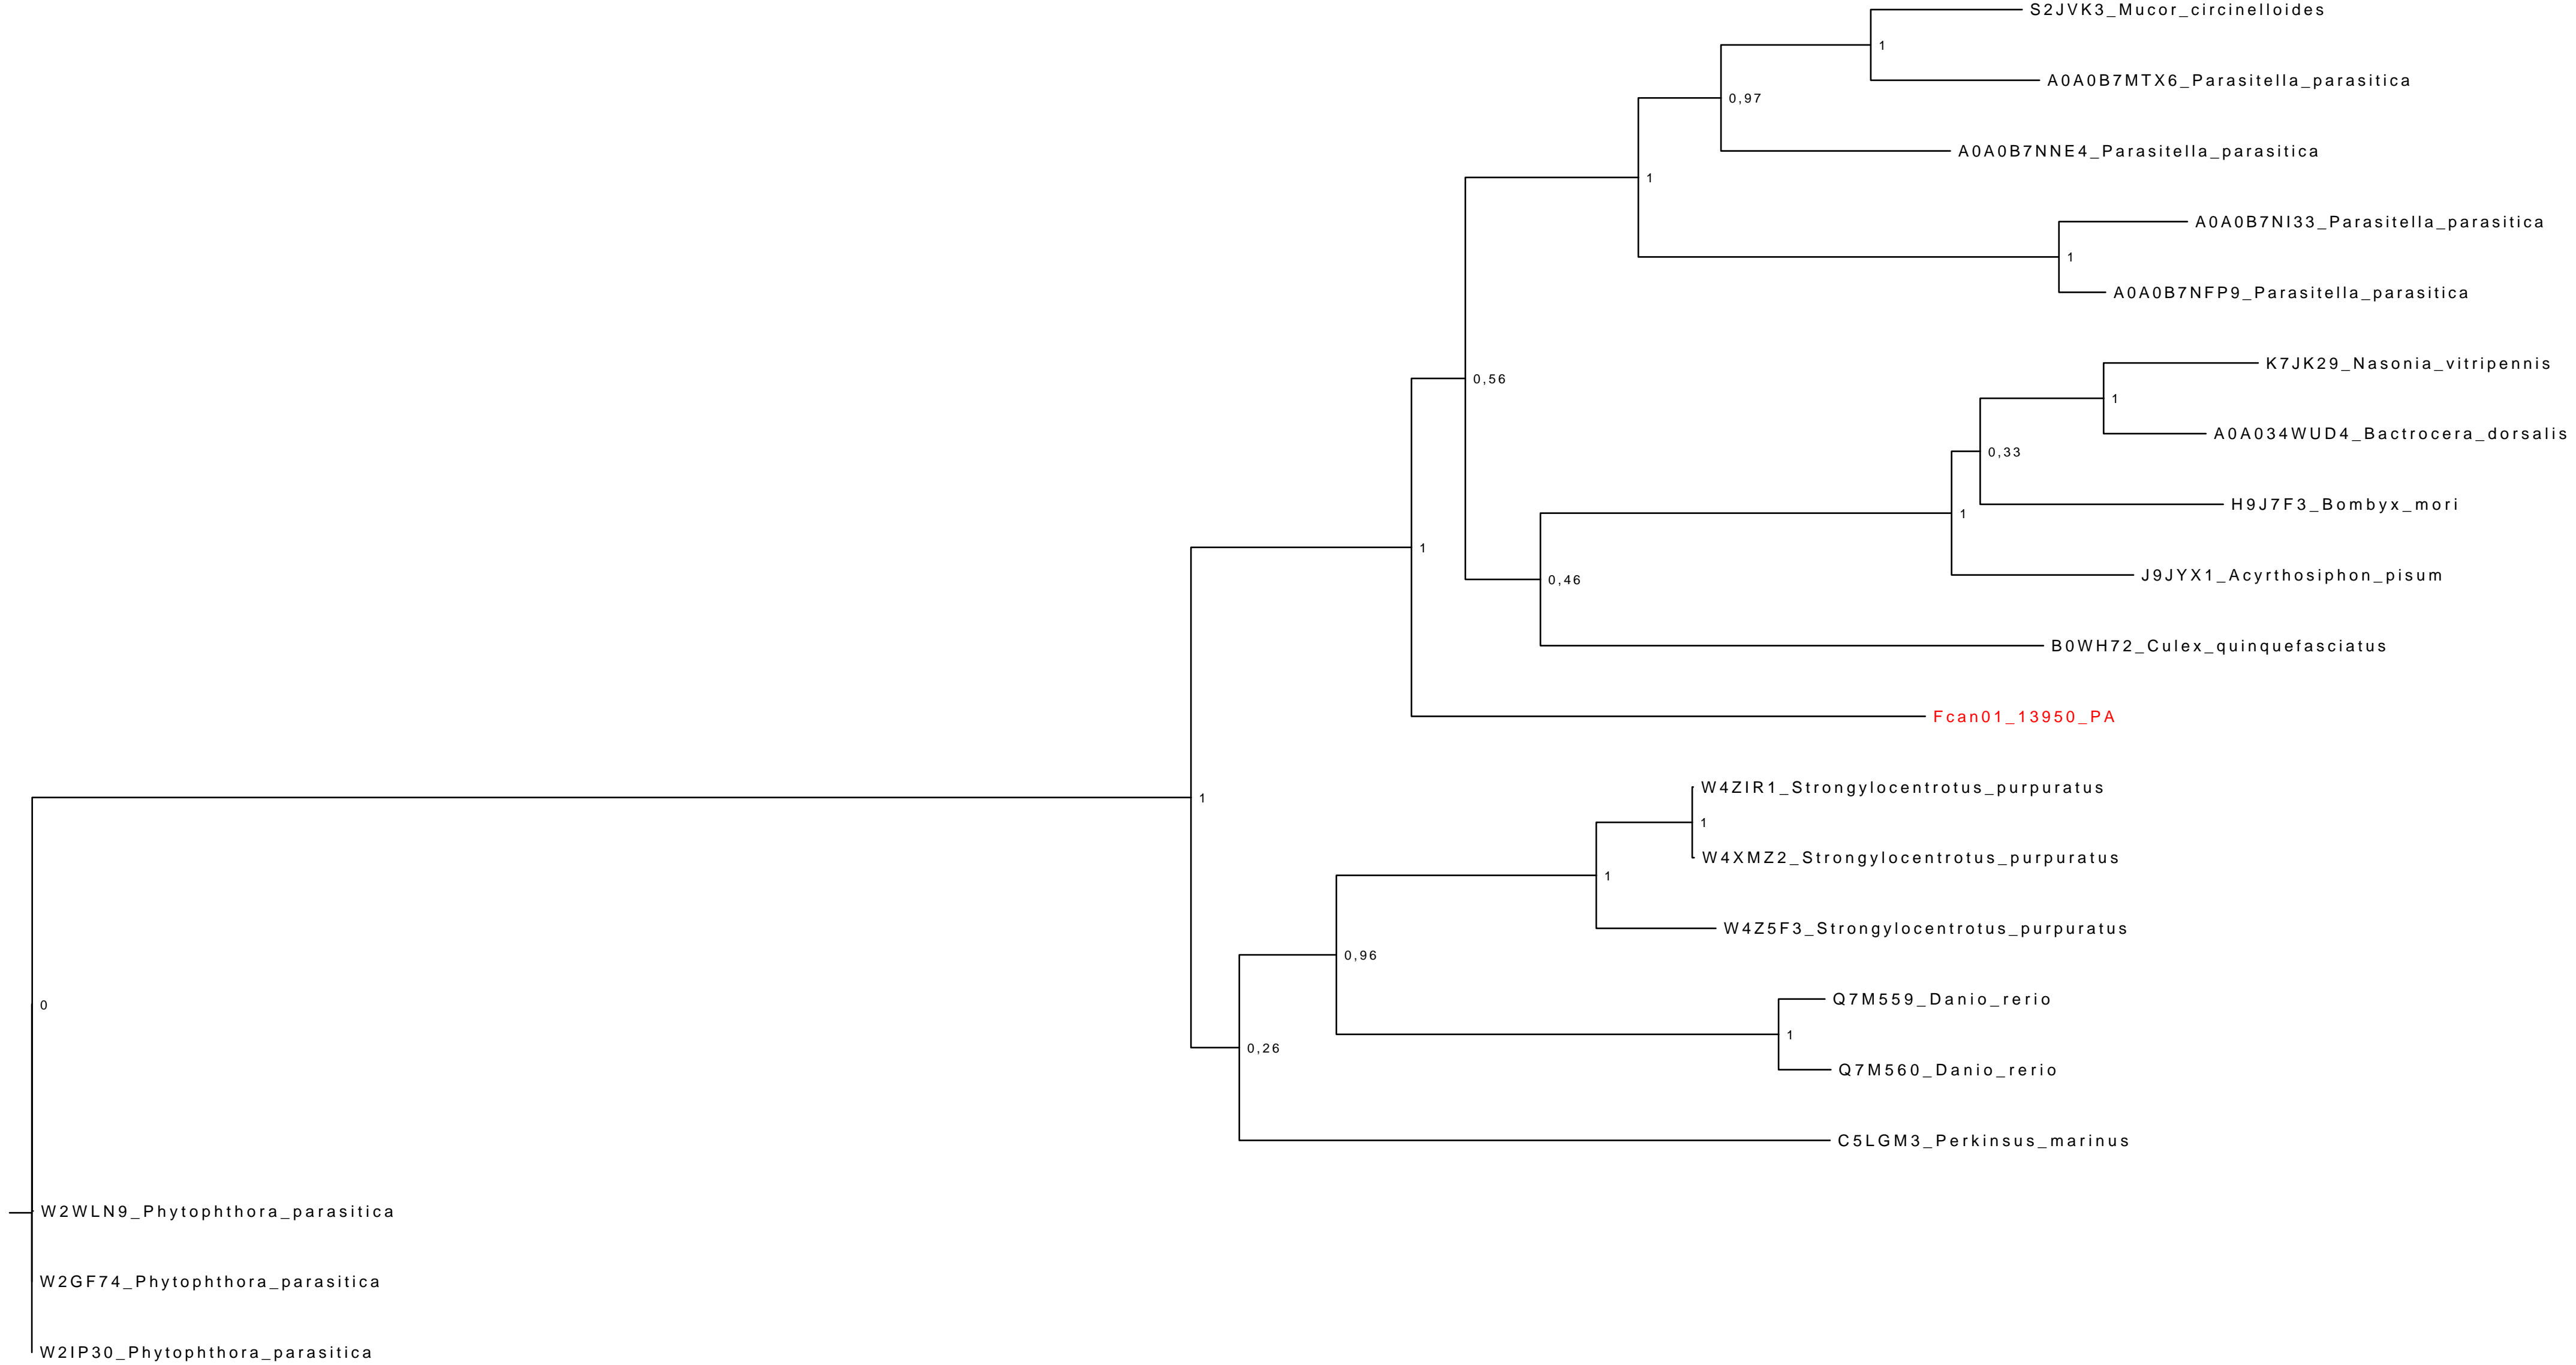

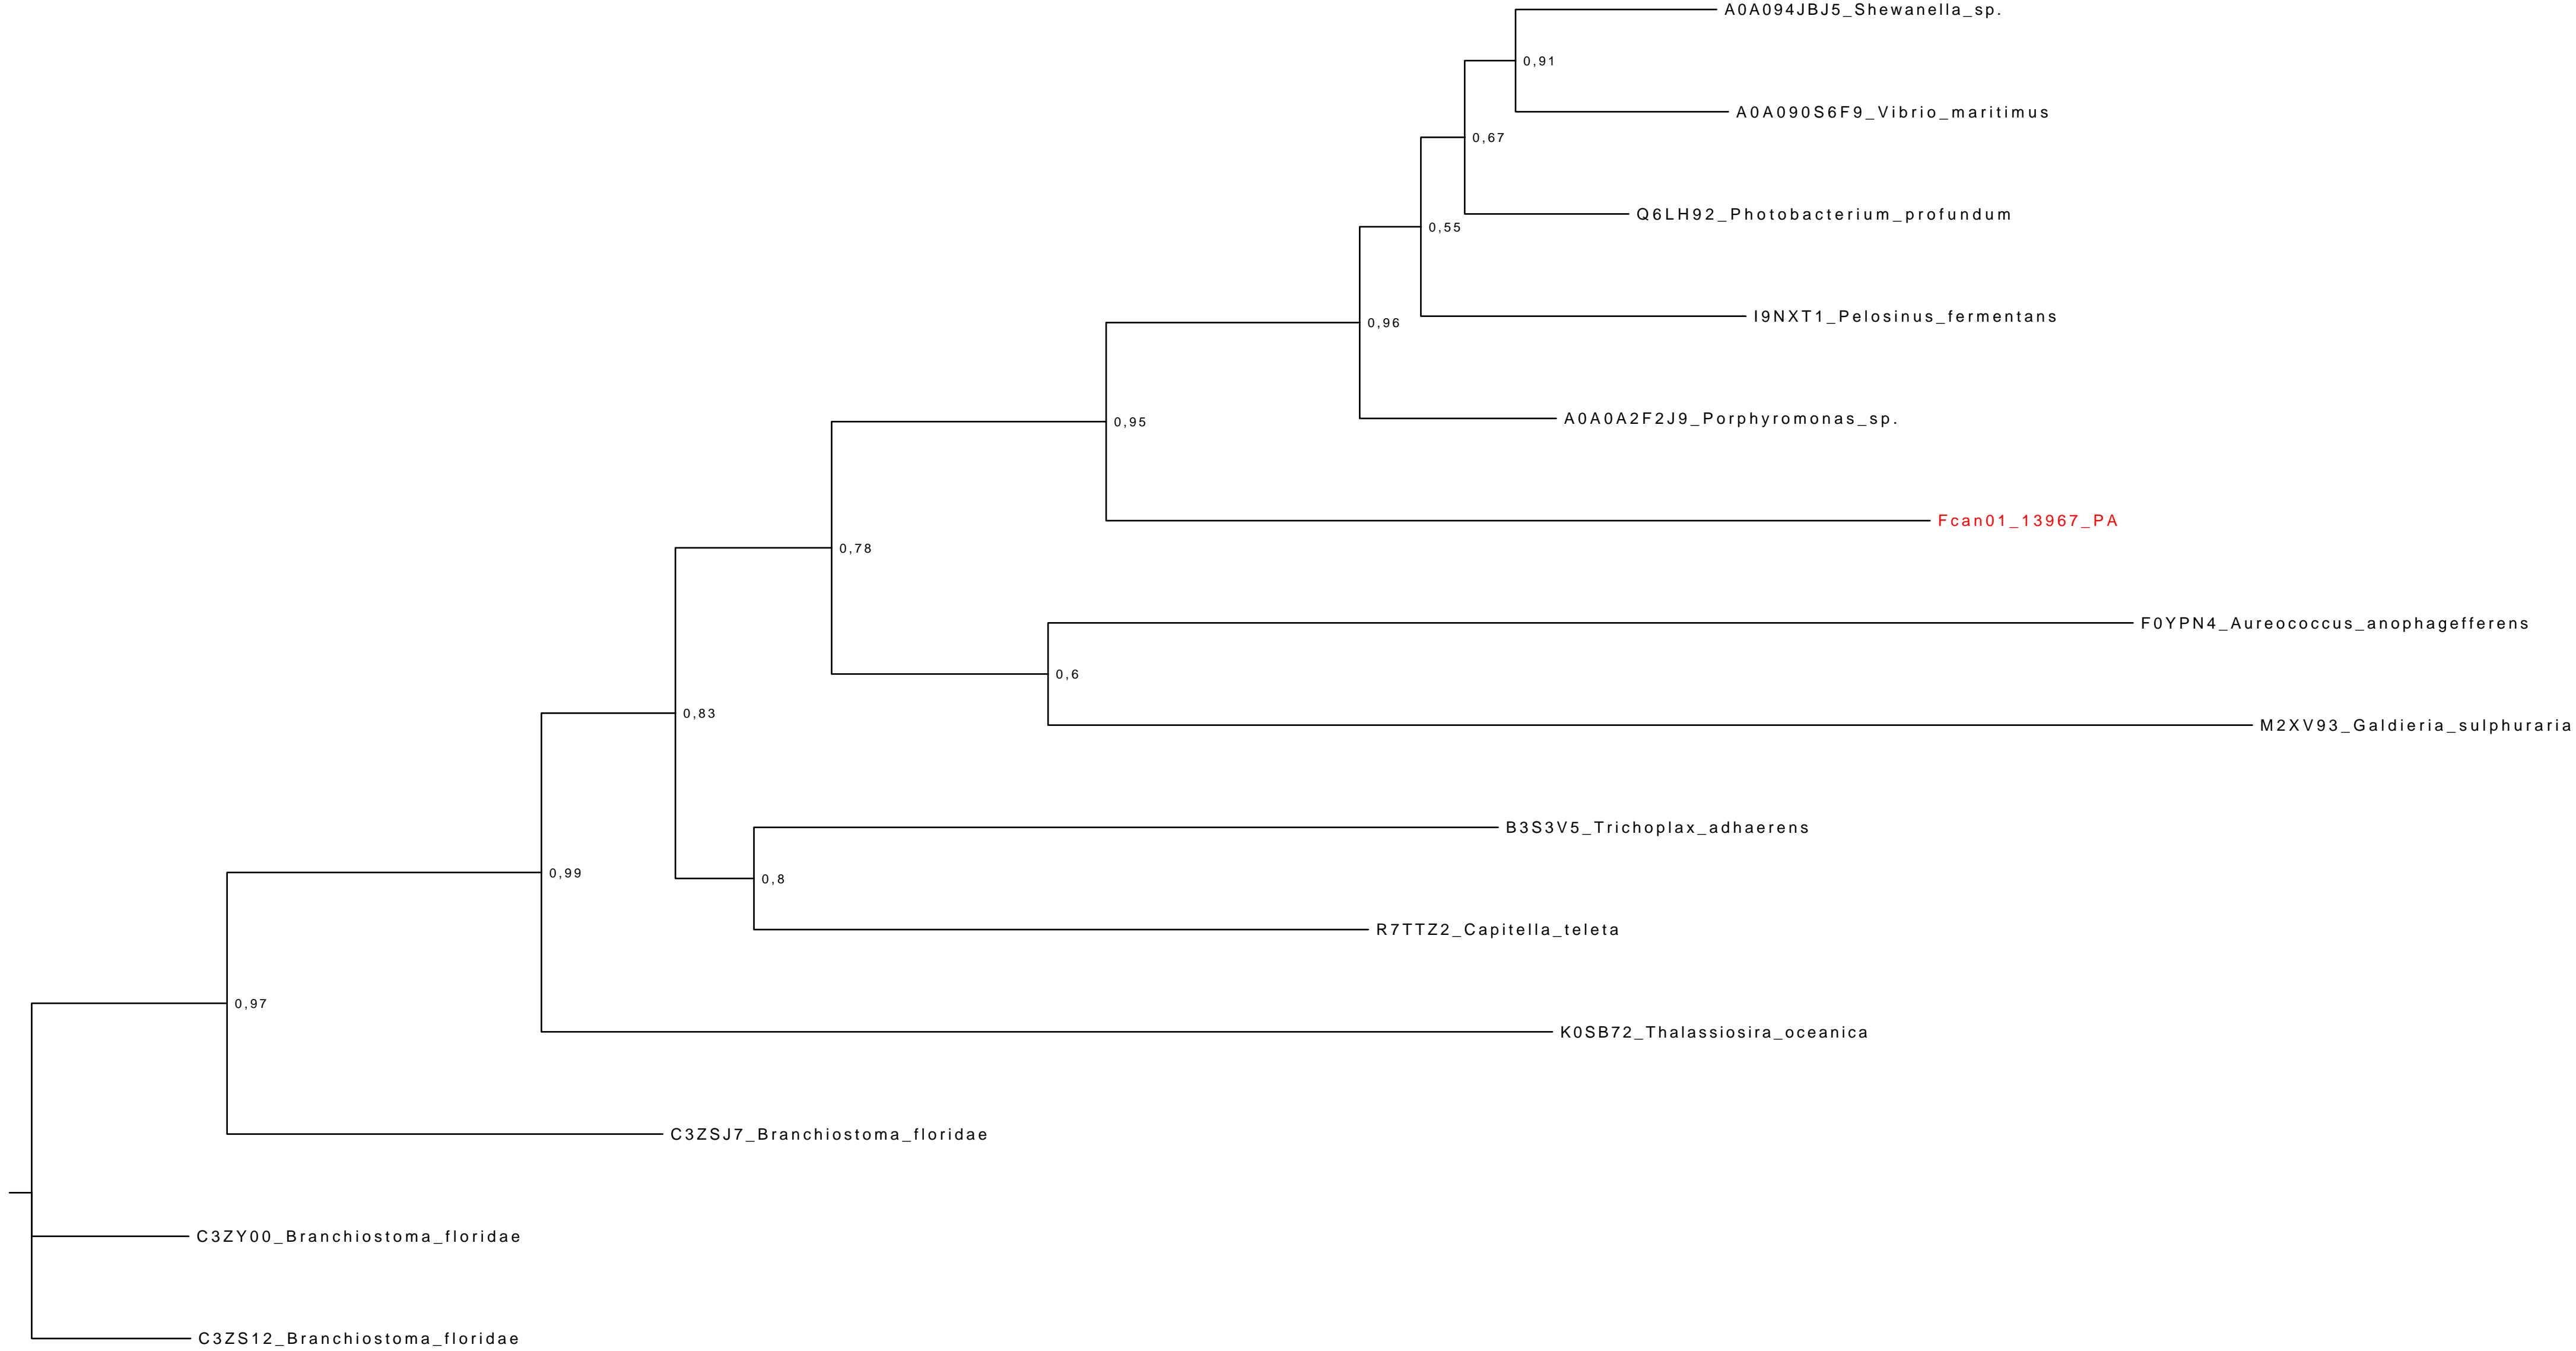

0.4

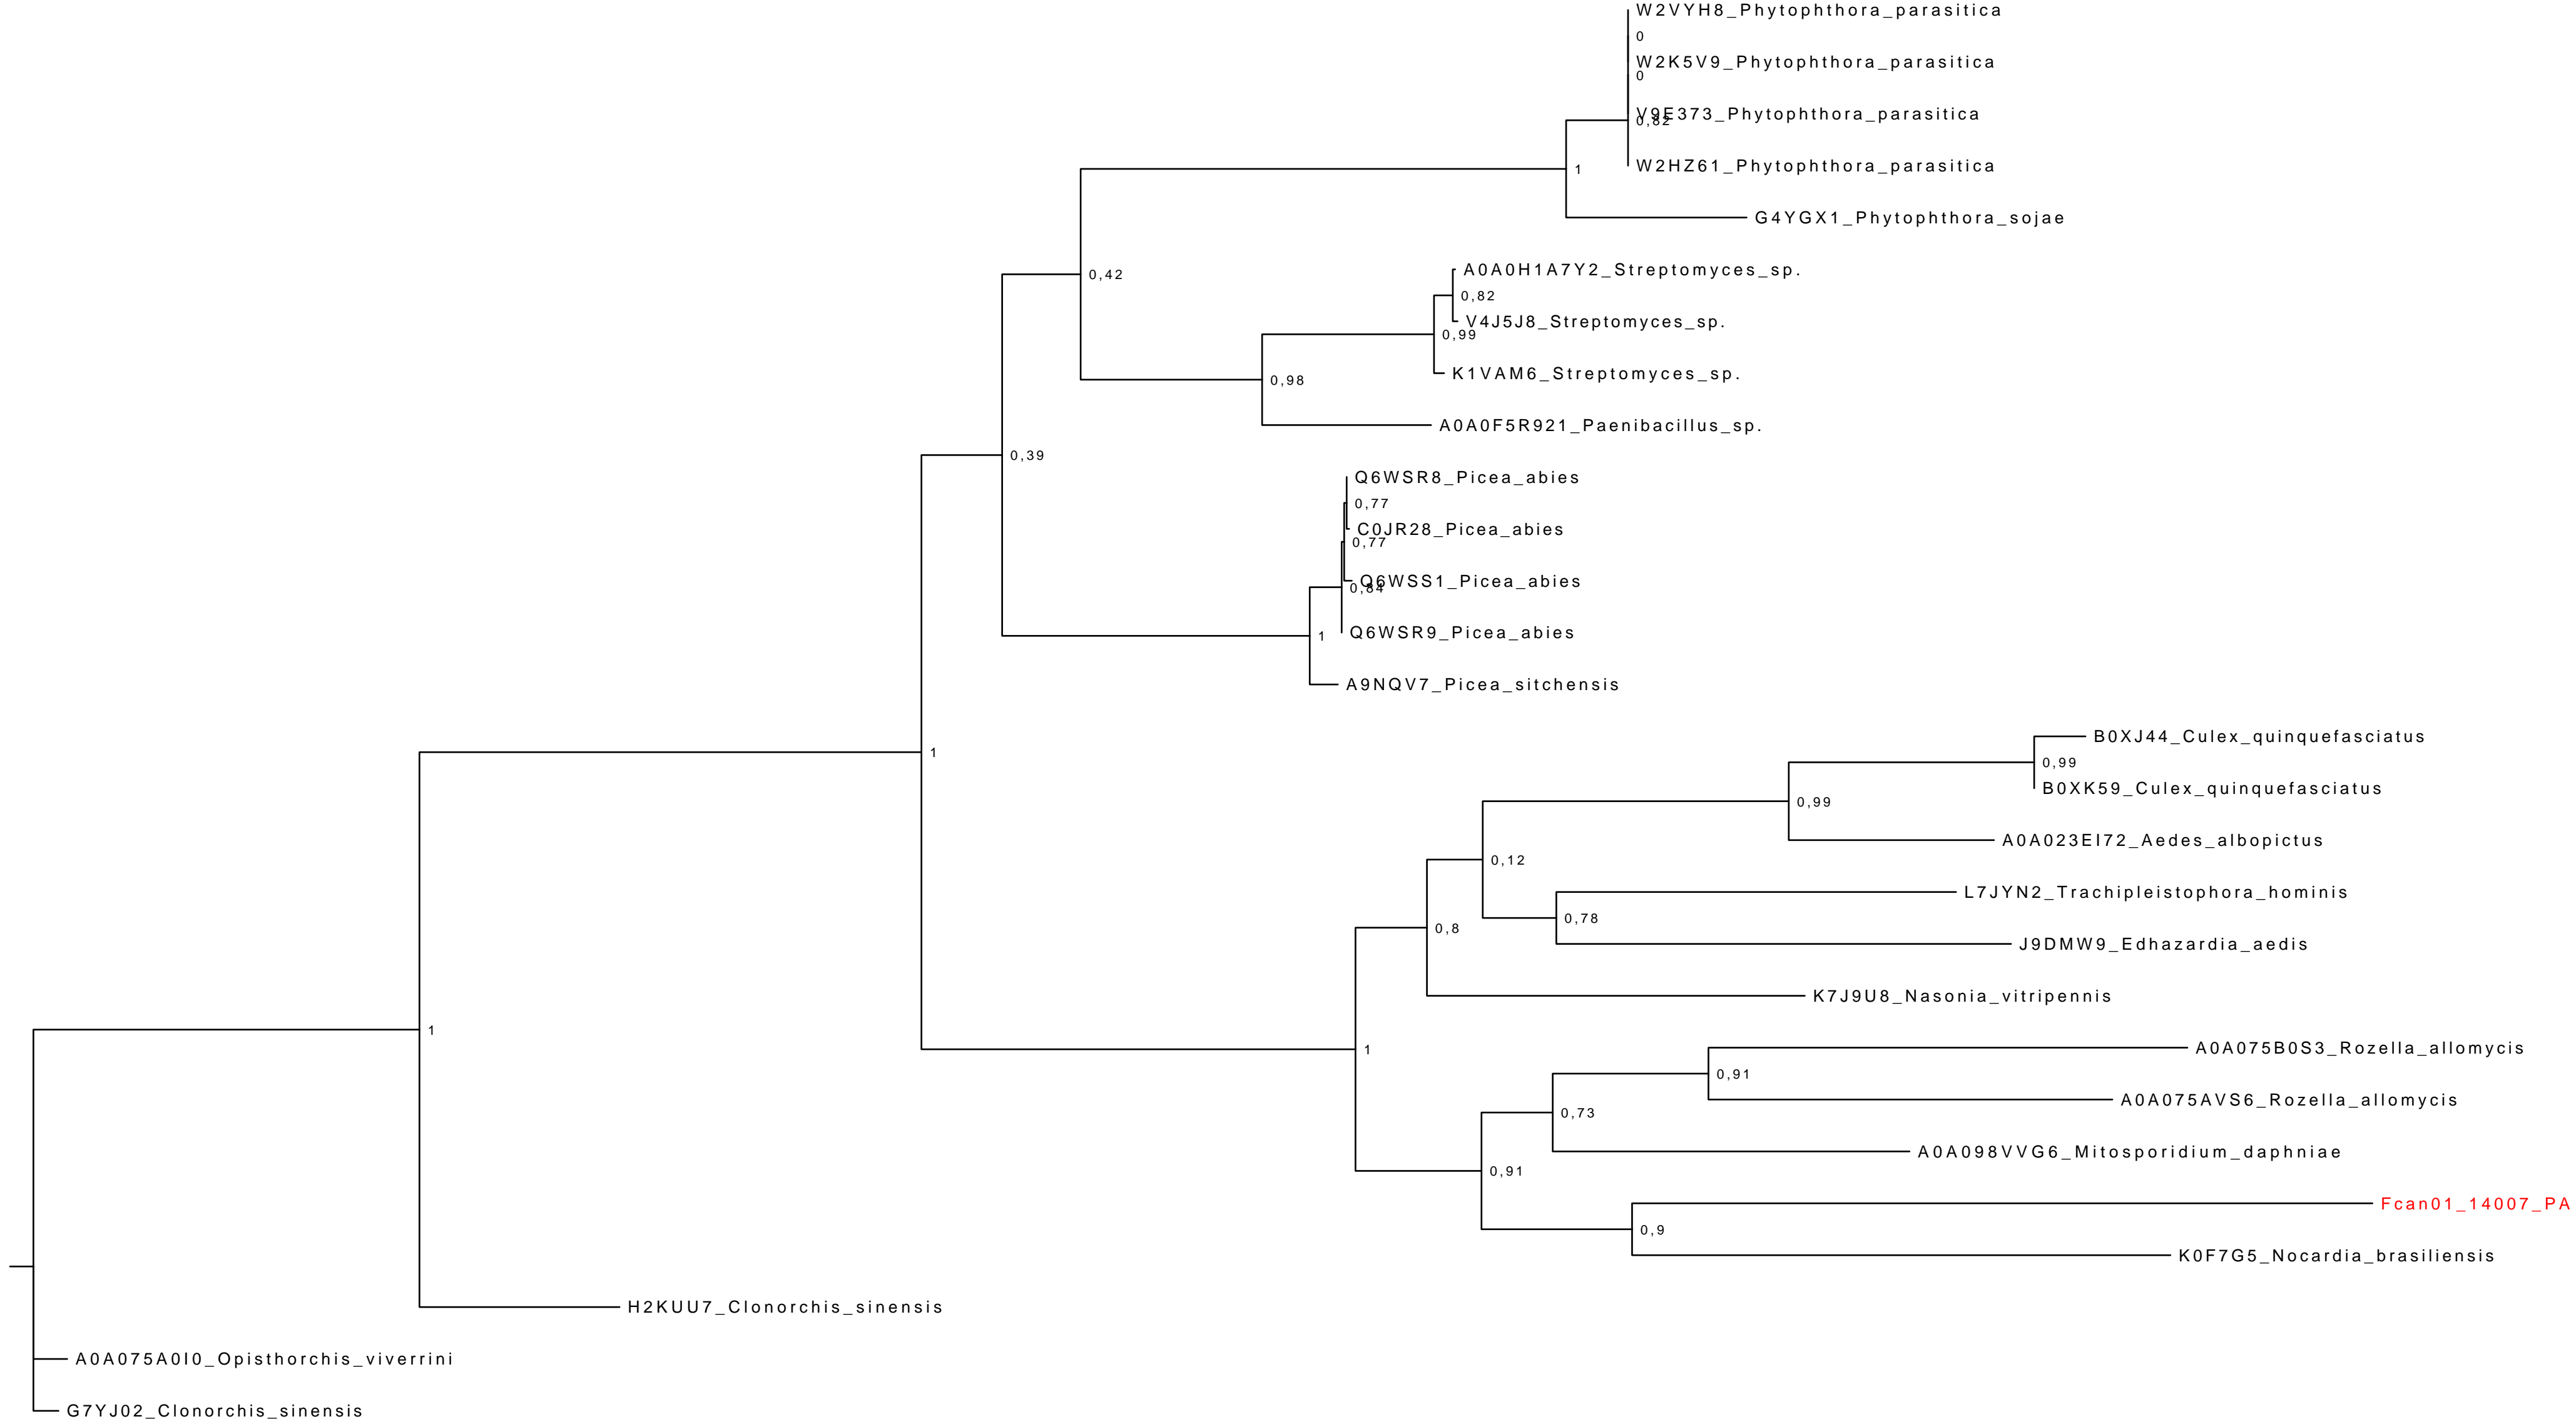

0.4

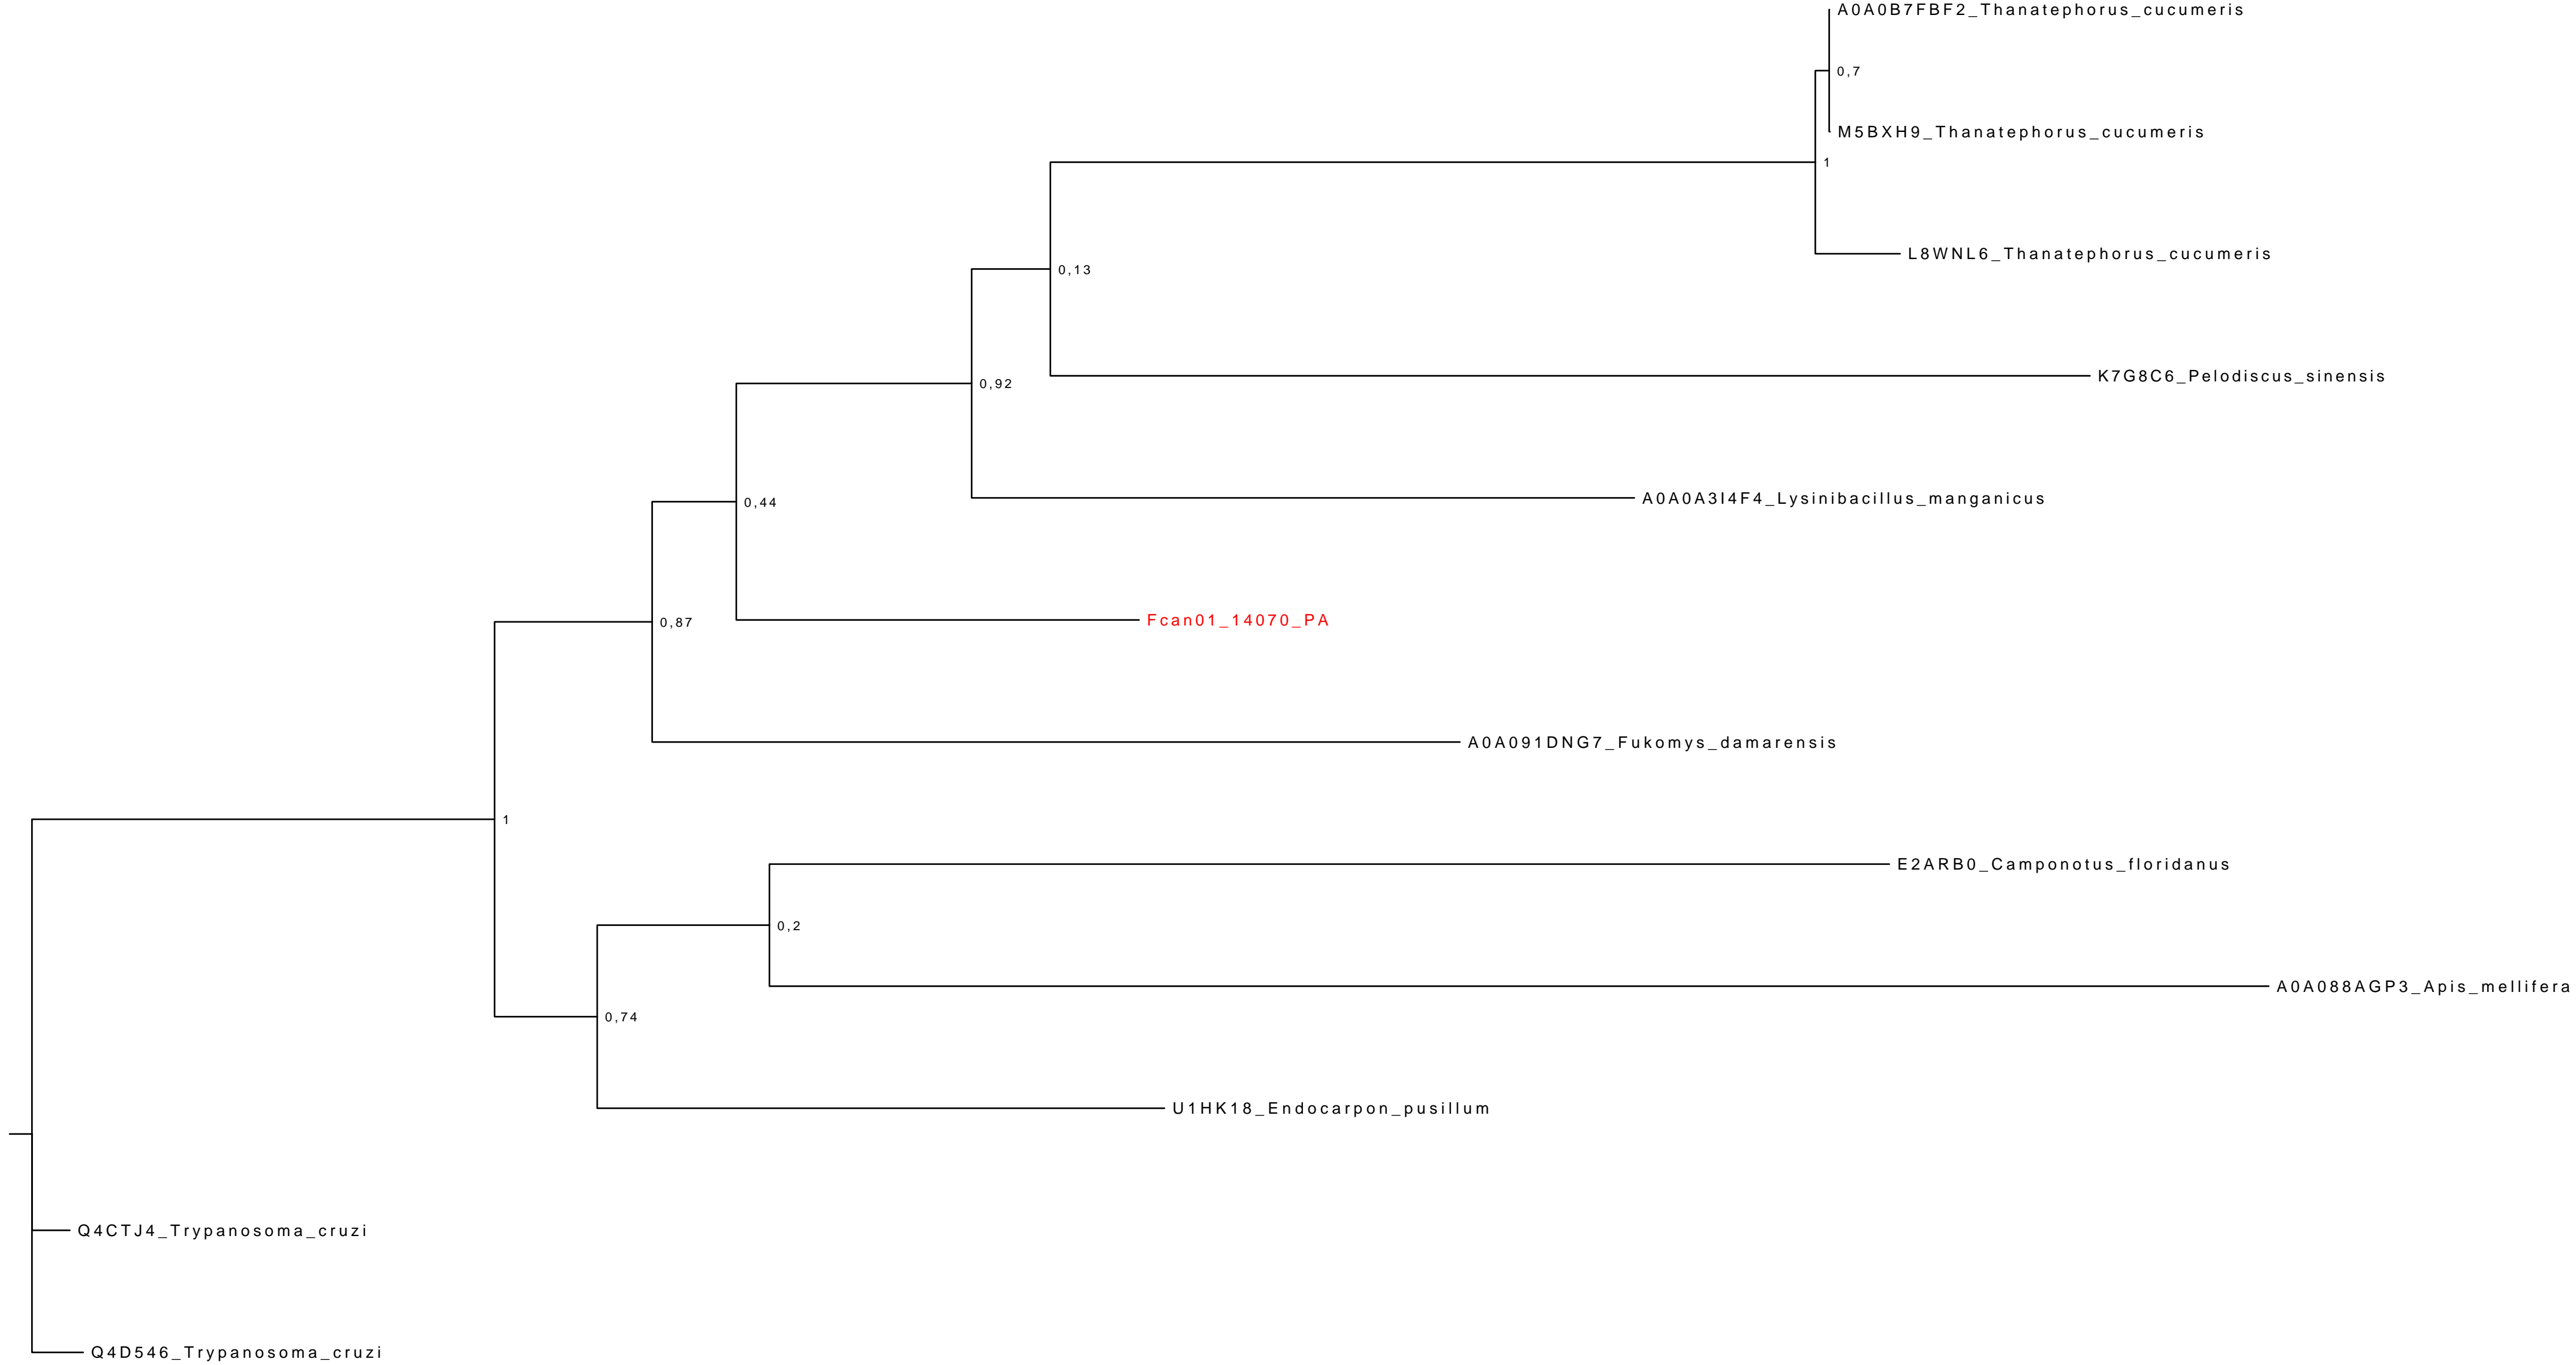



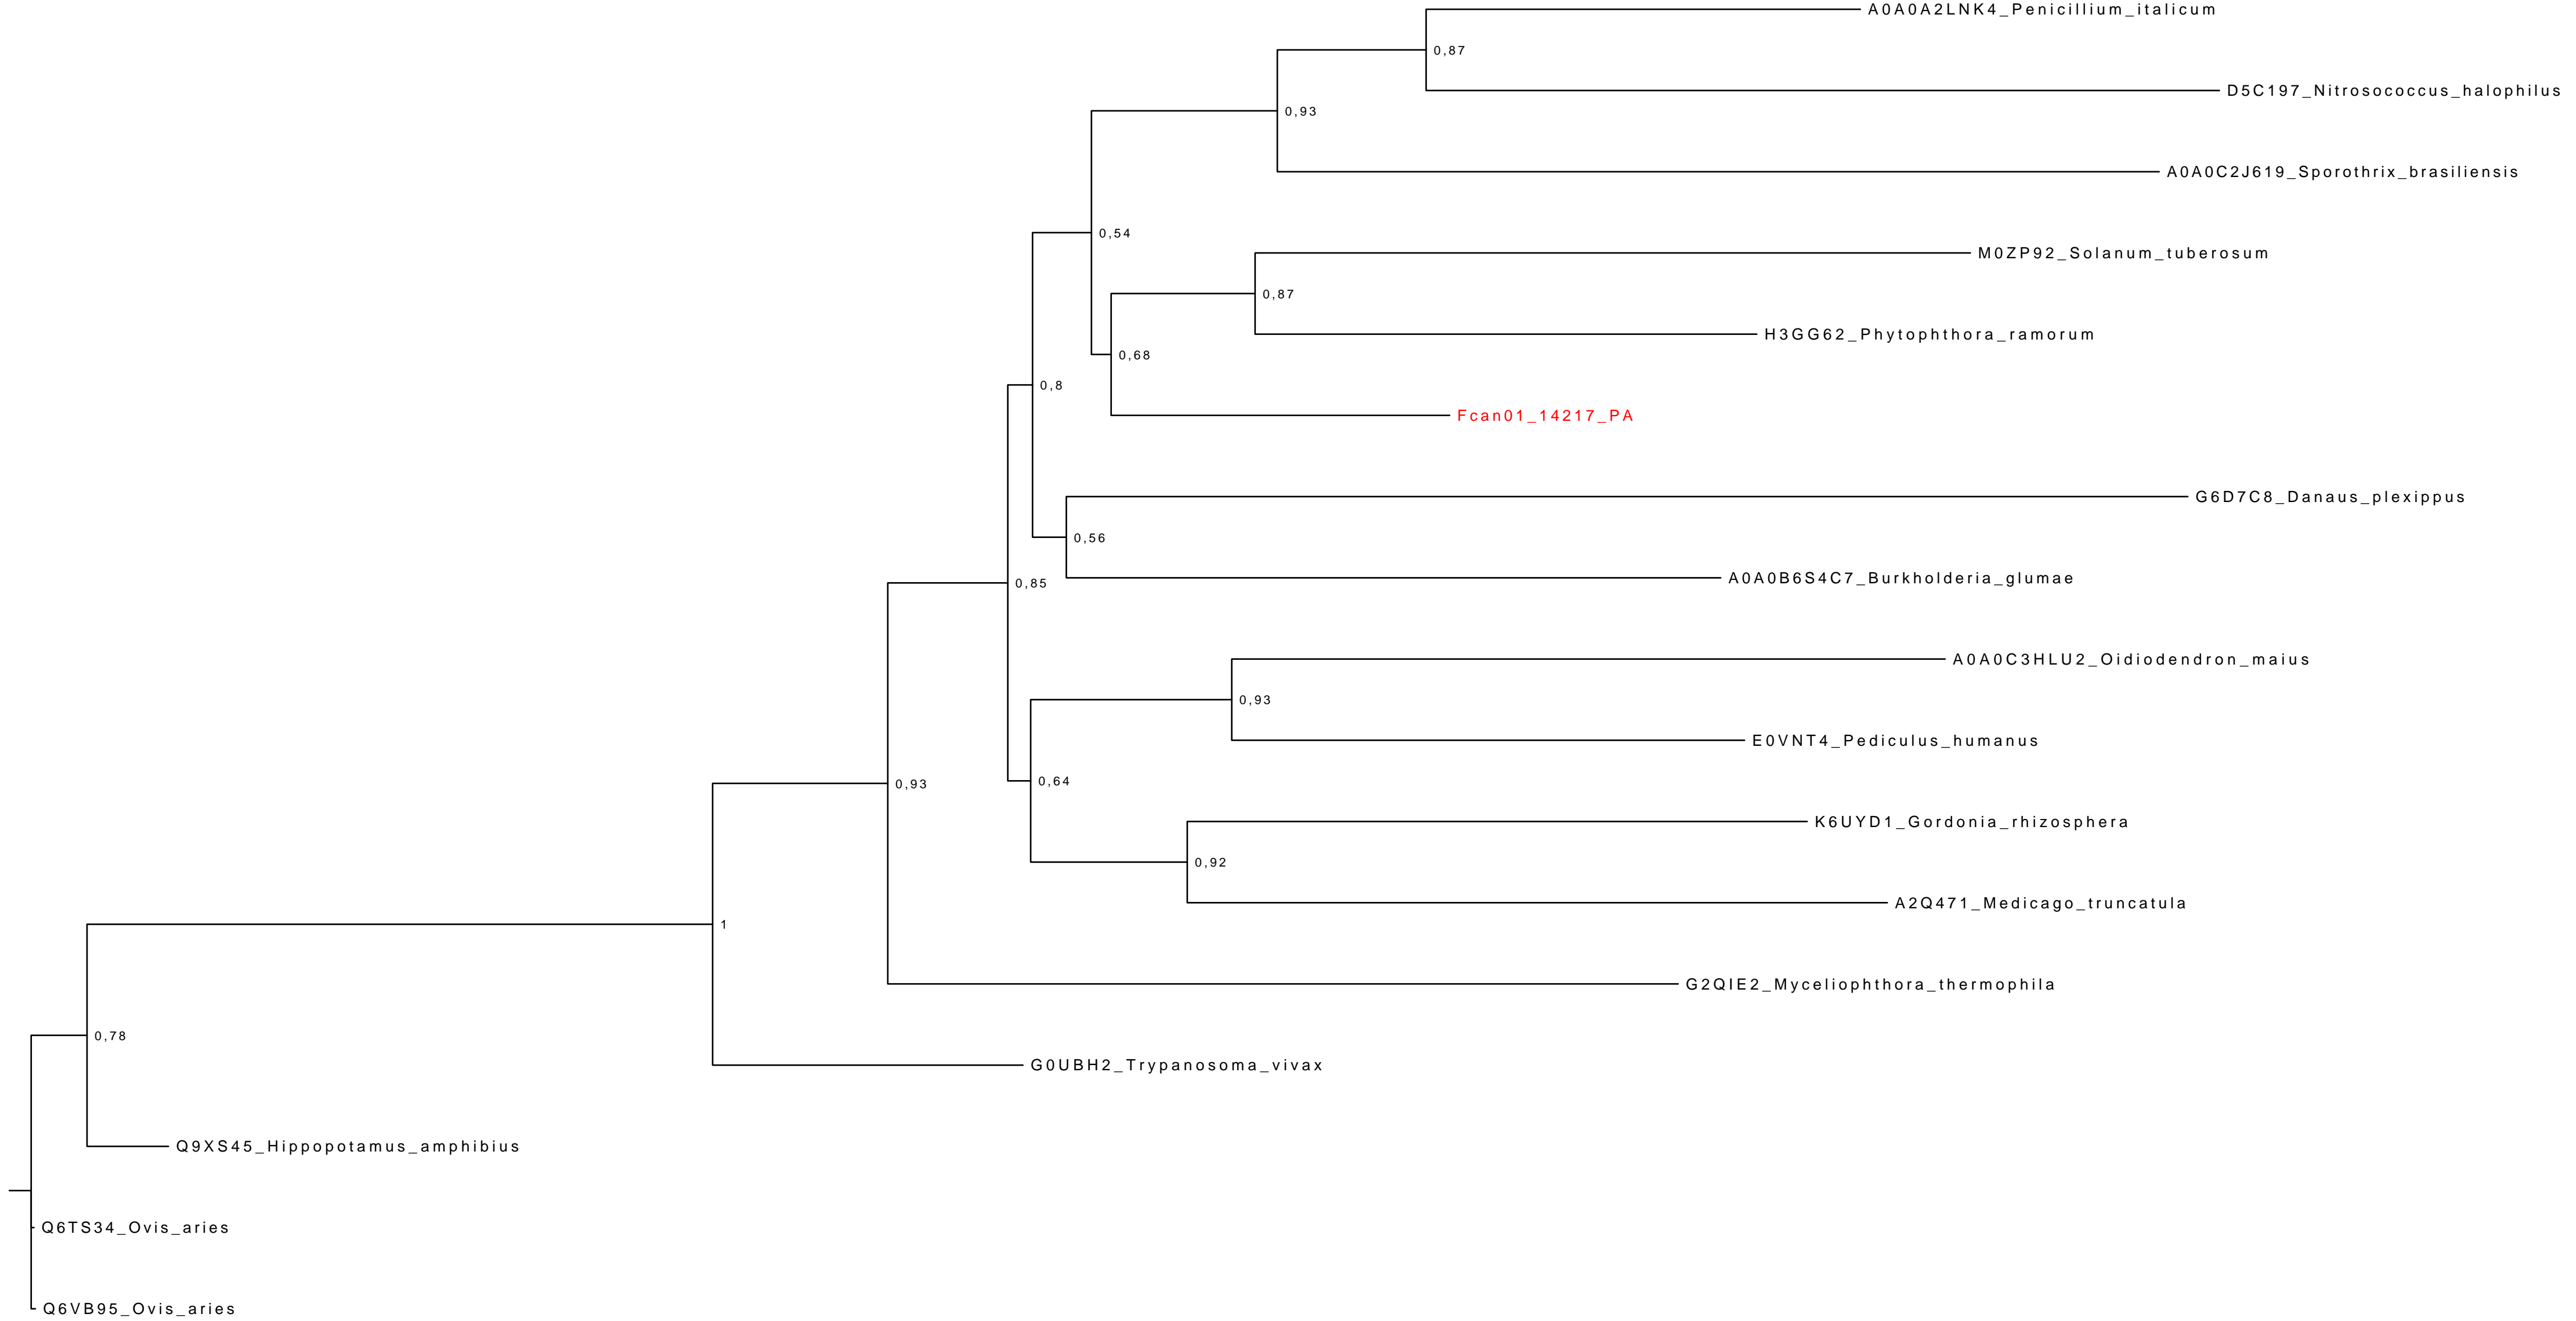

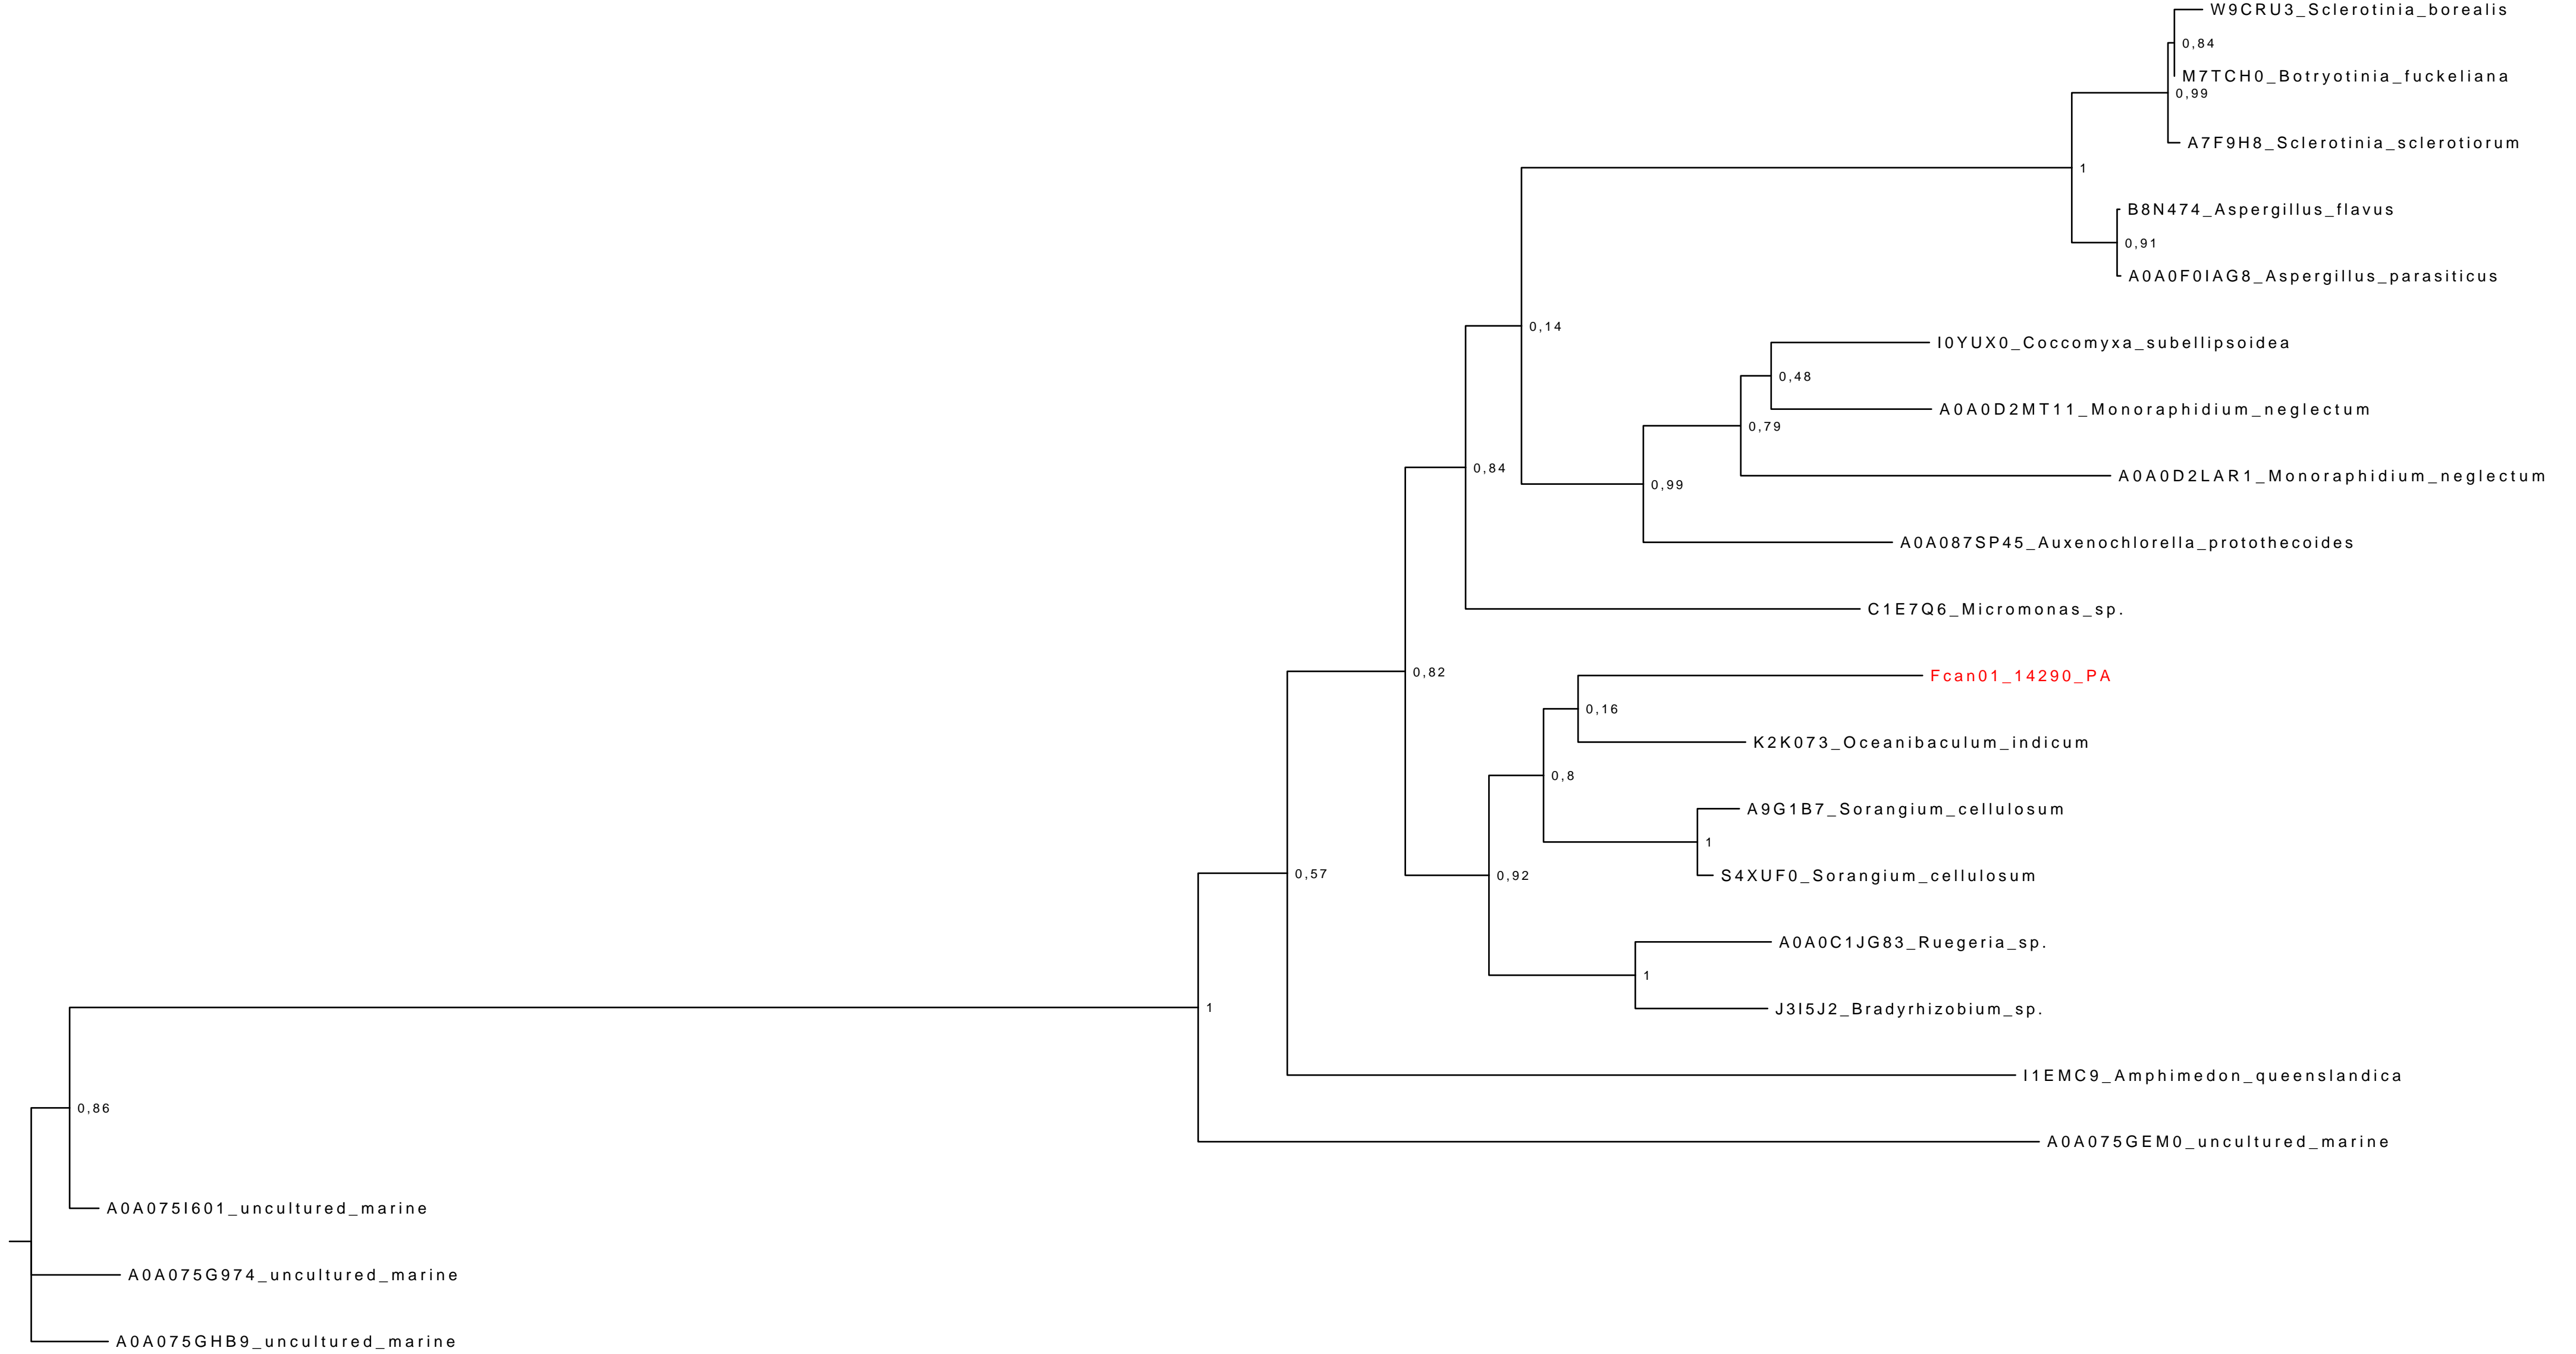

0.4

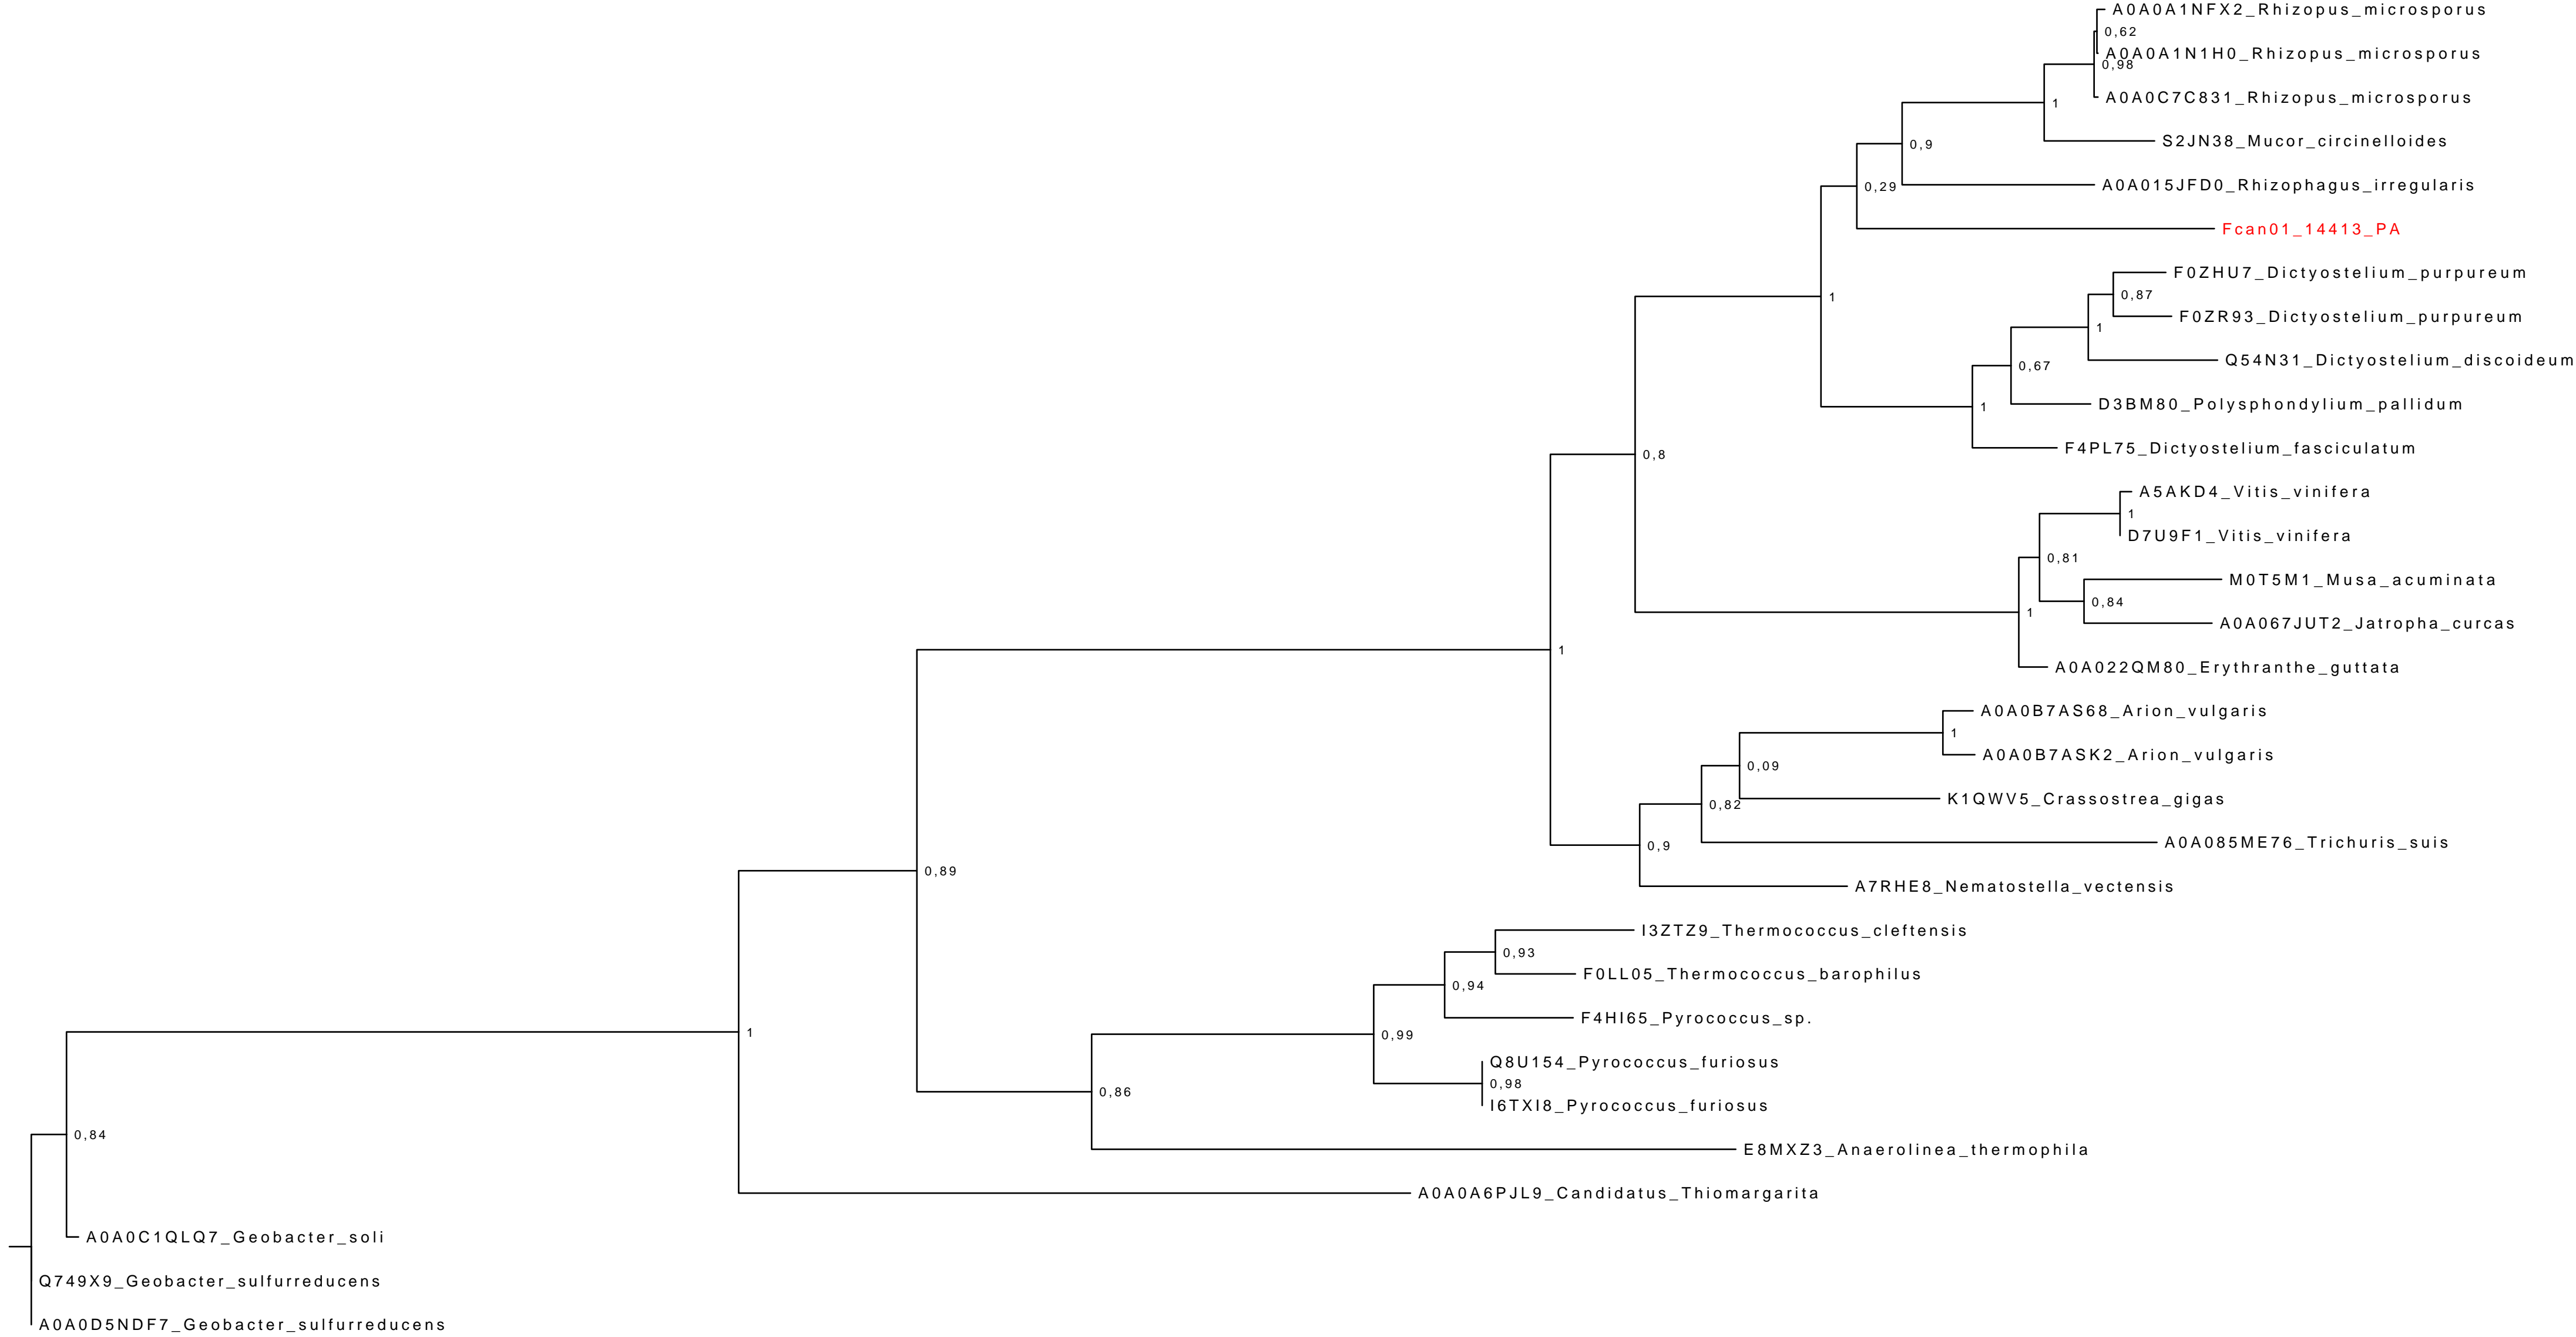

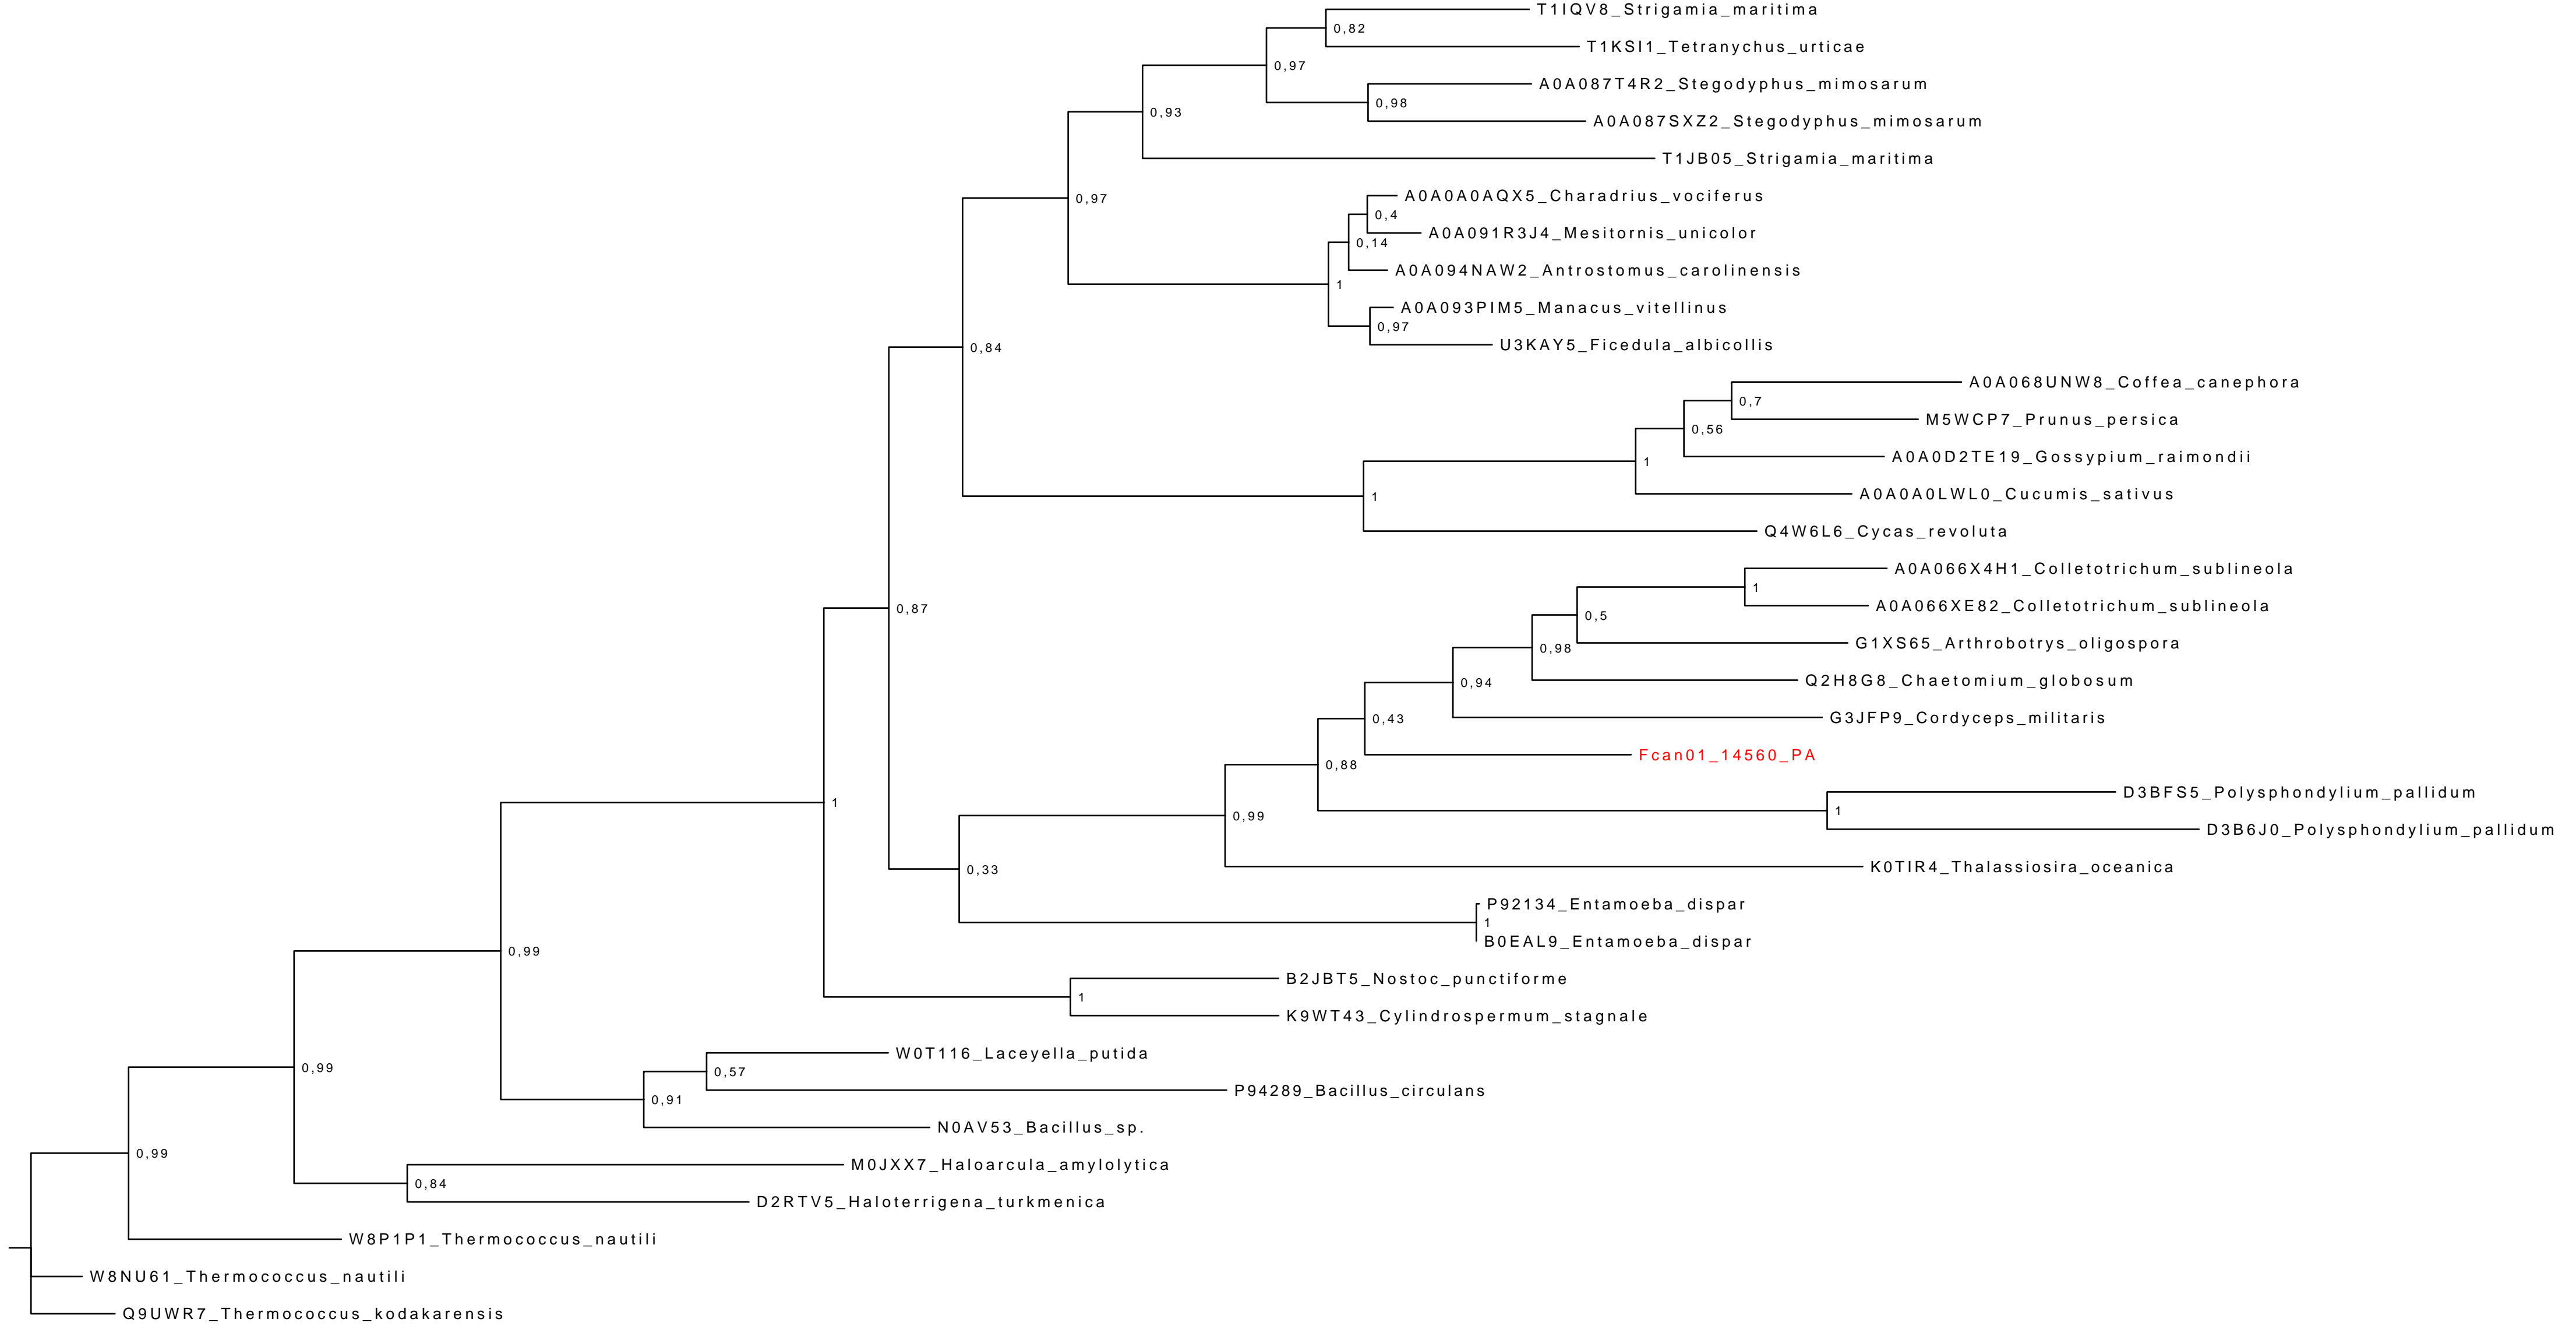

0.4

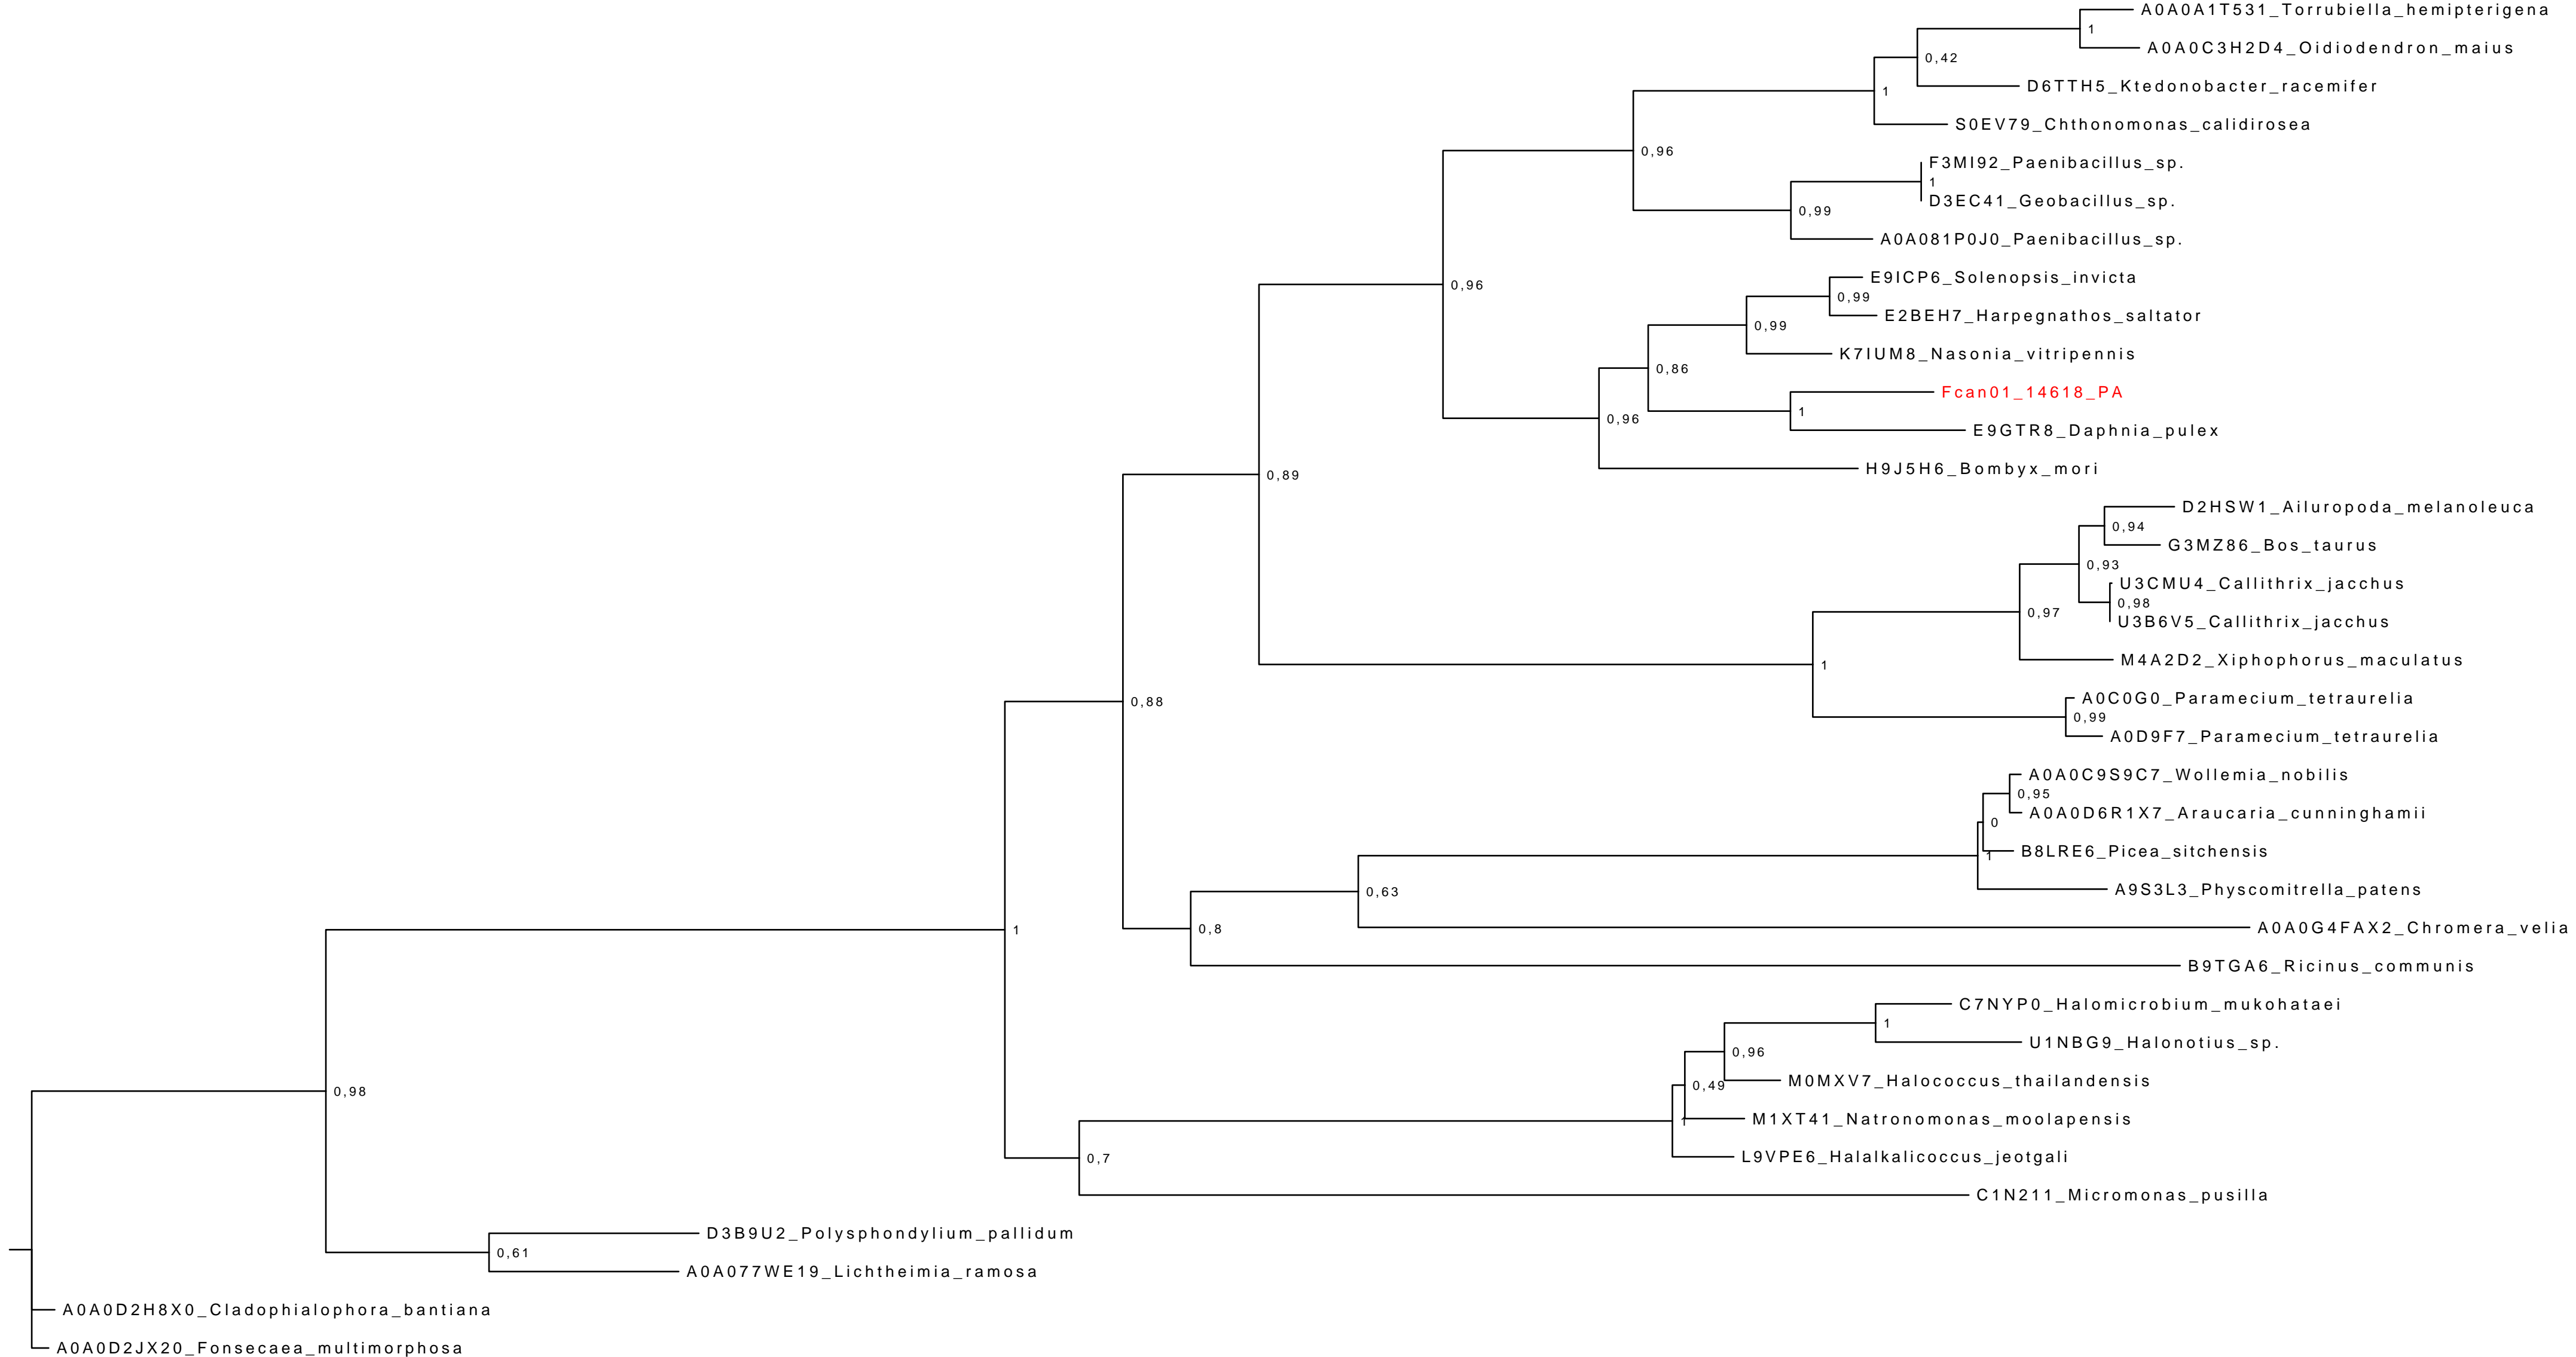

0.5

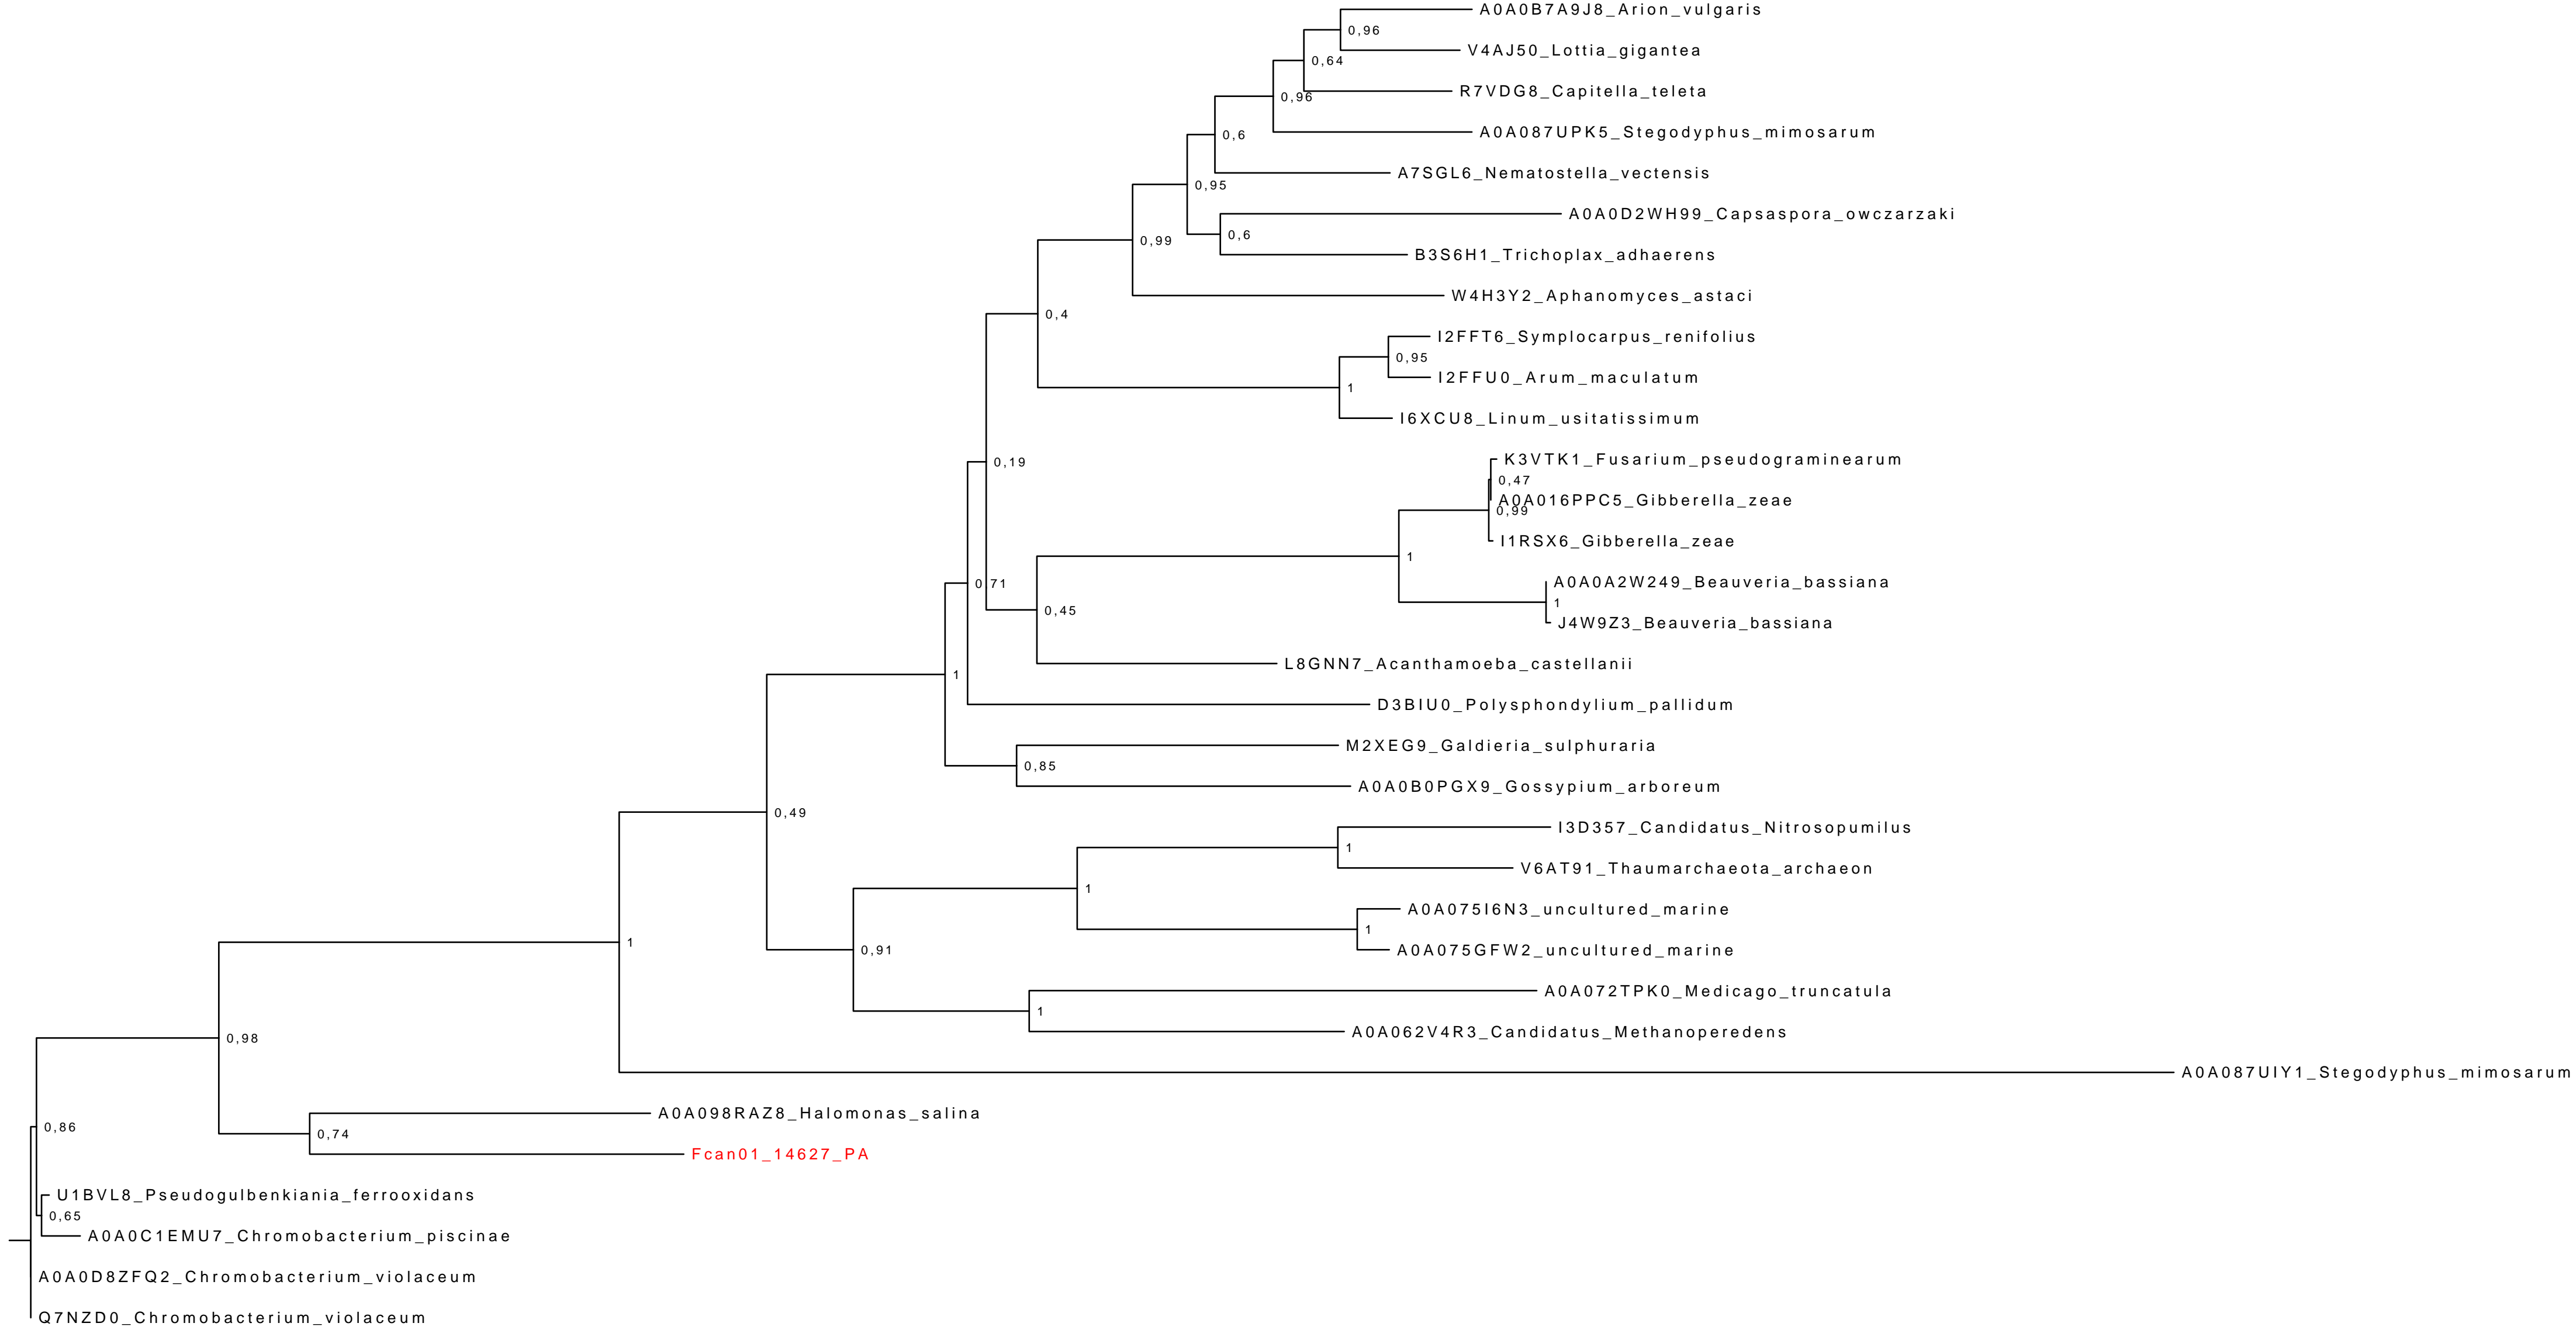

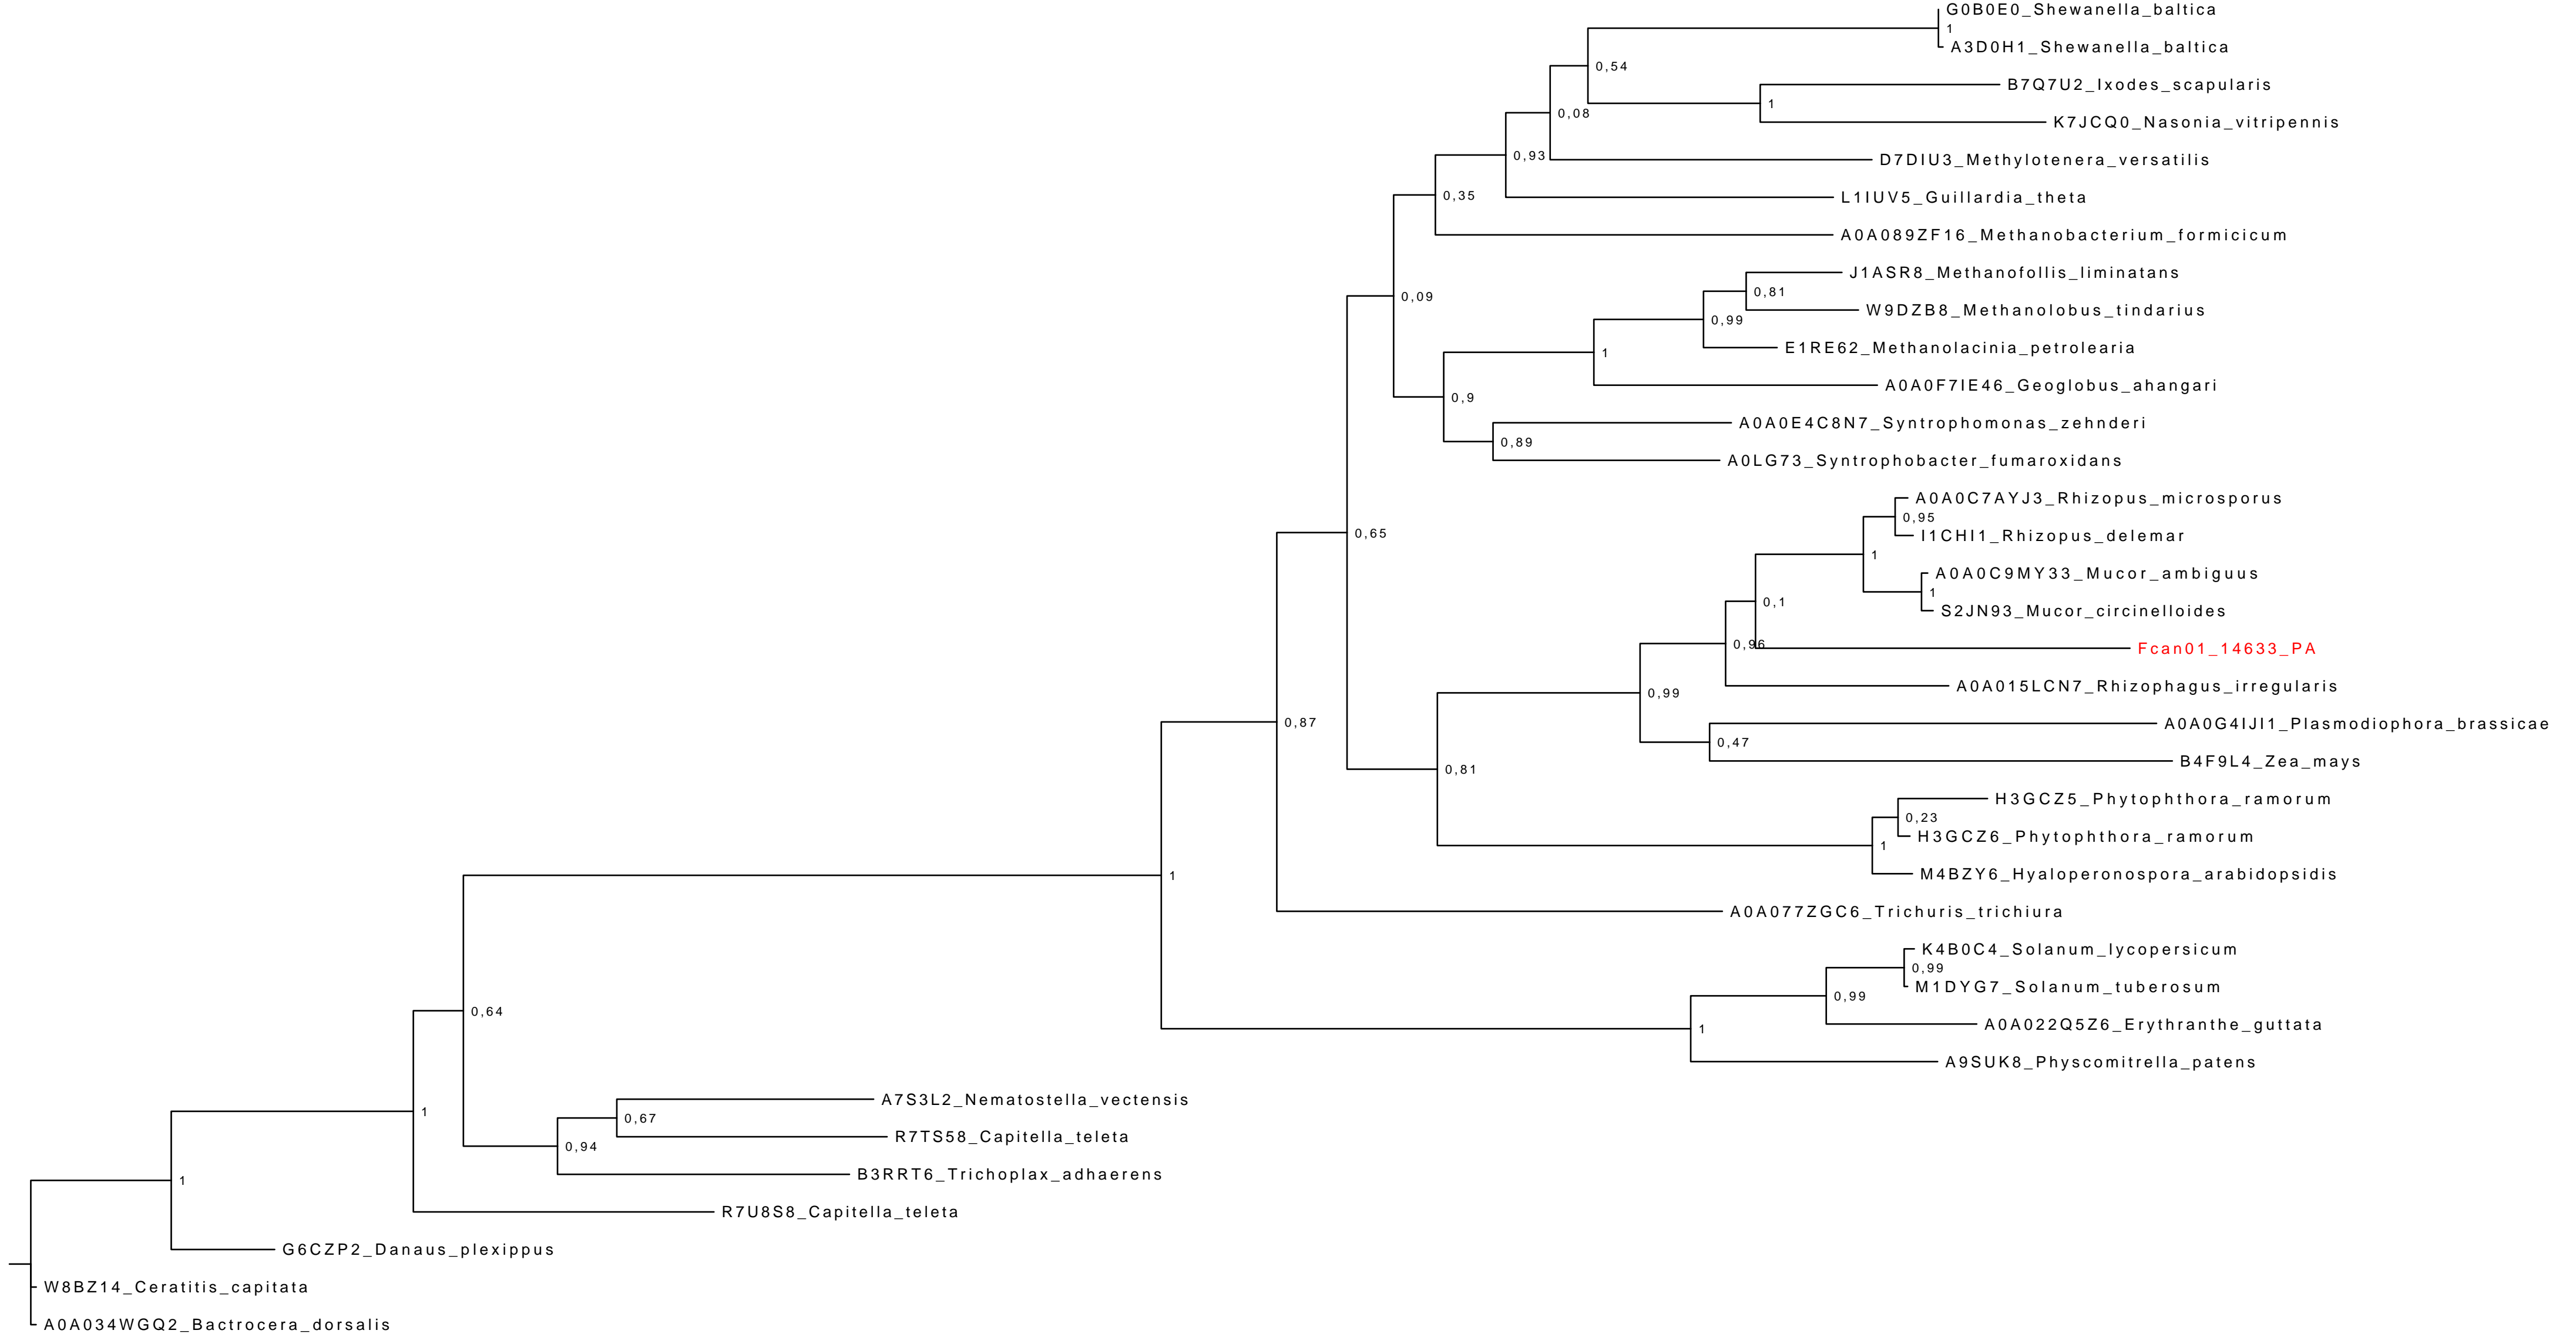

0.4

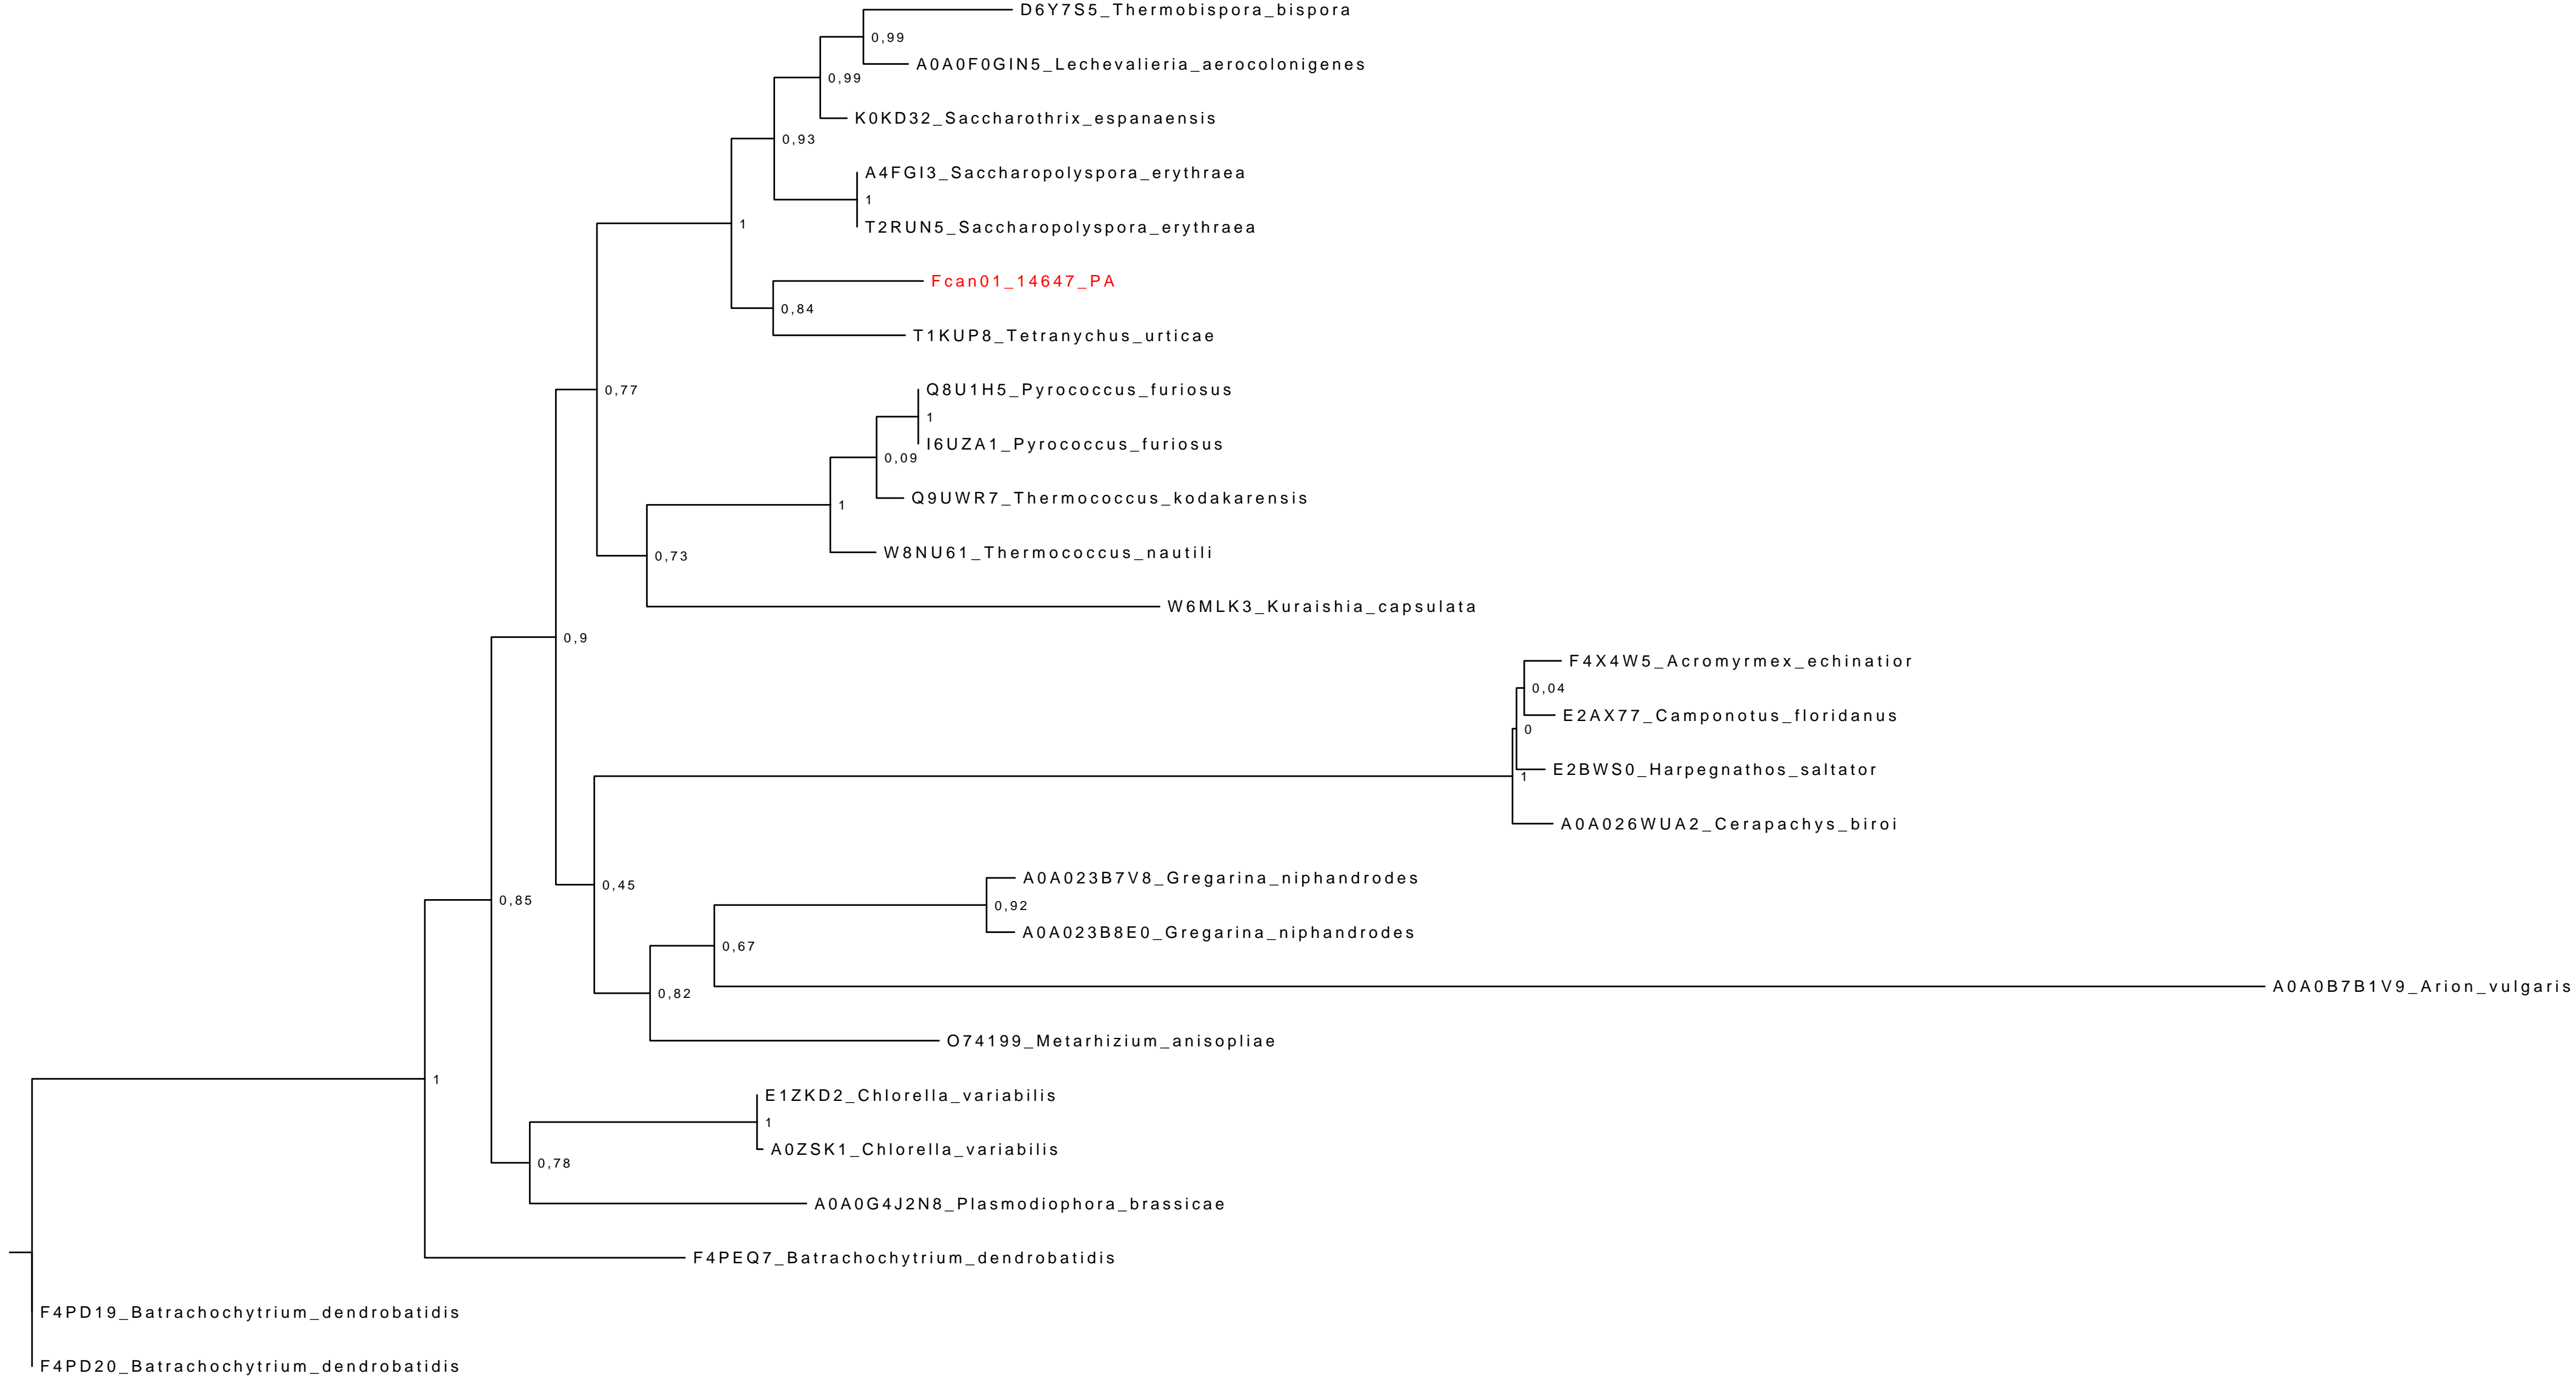



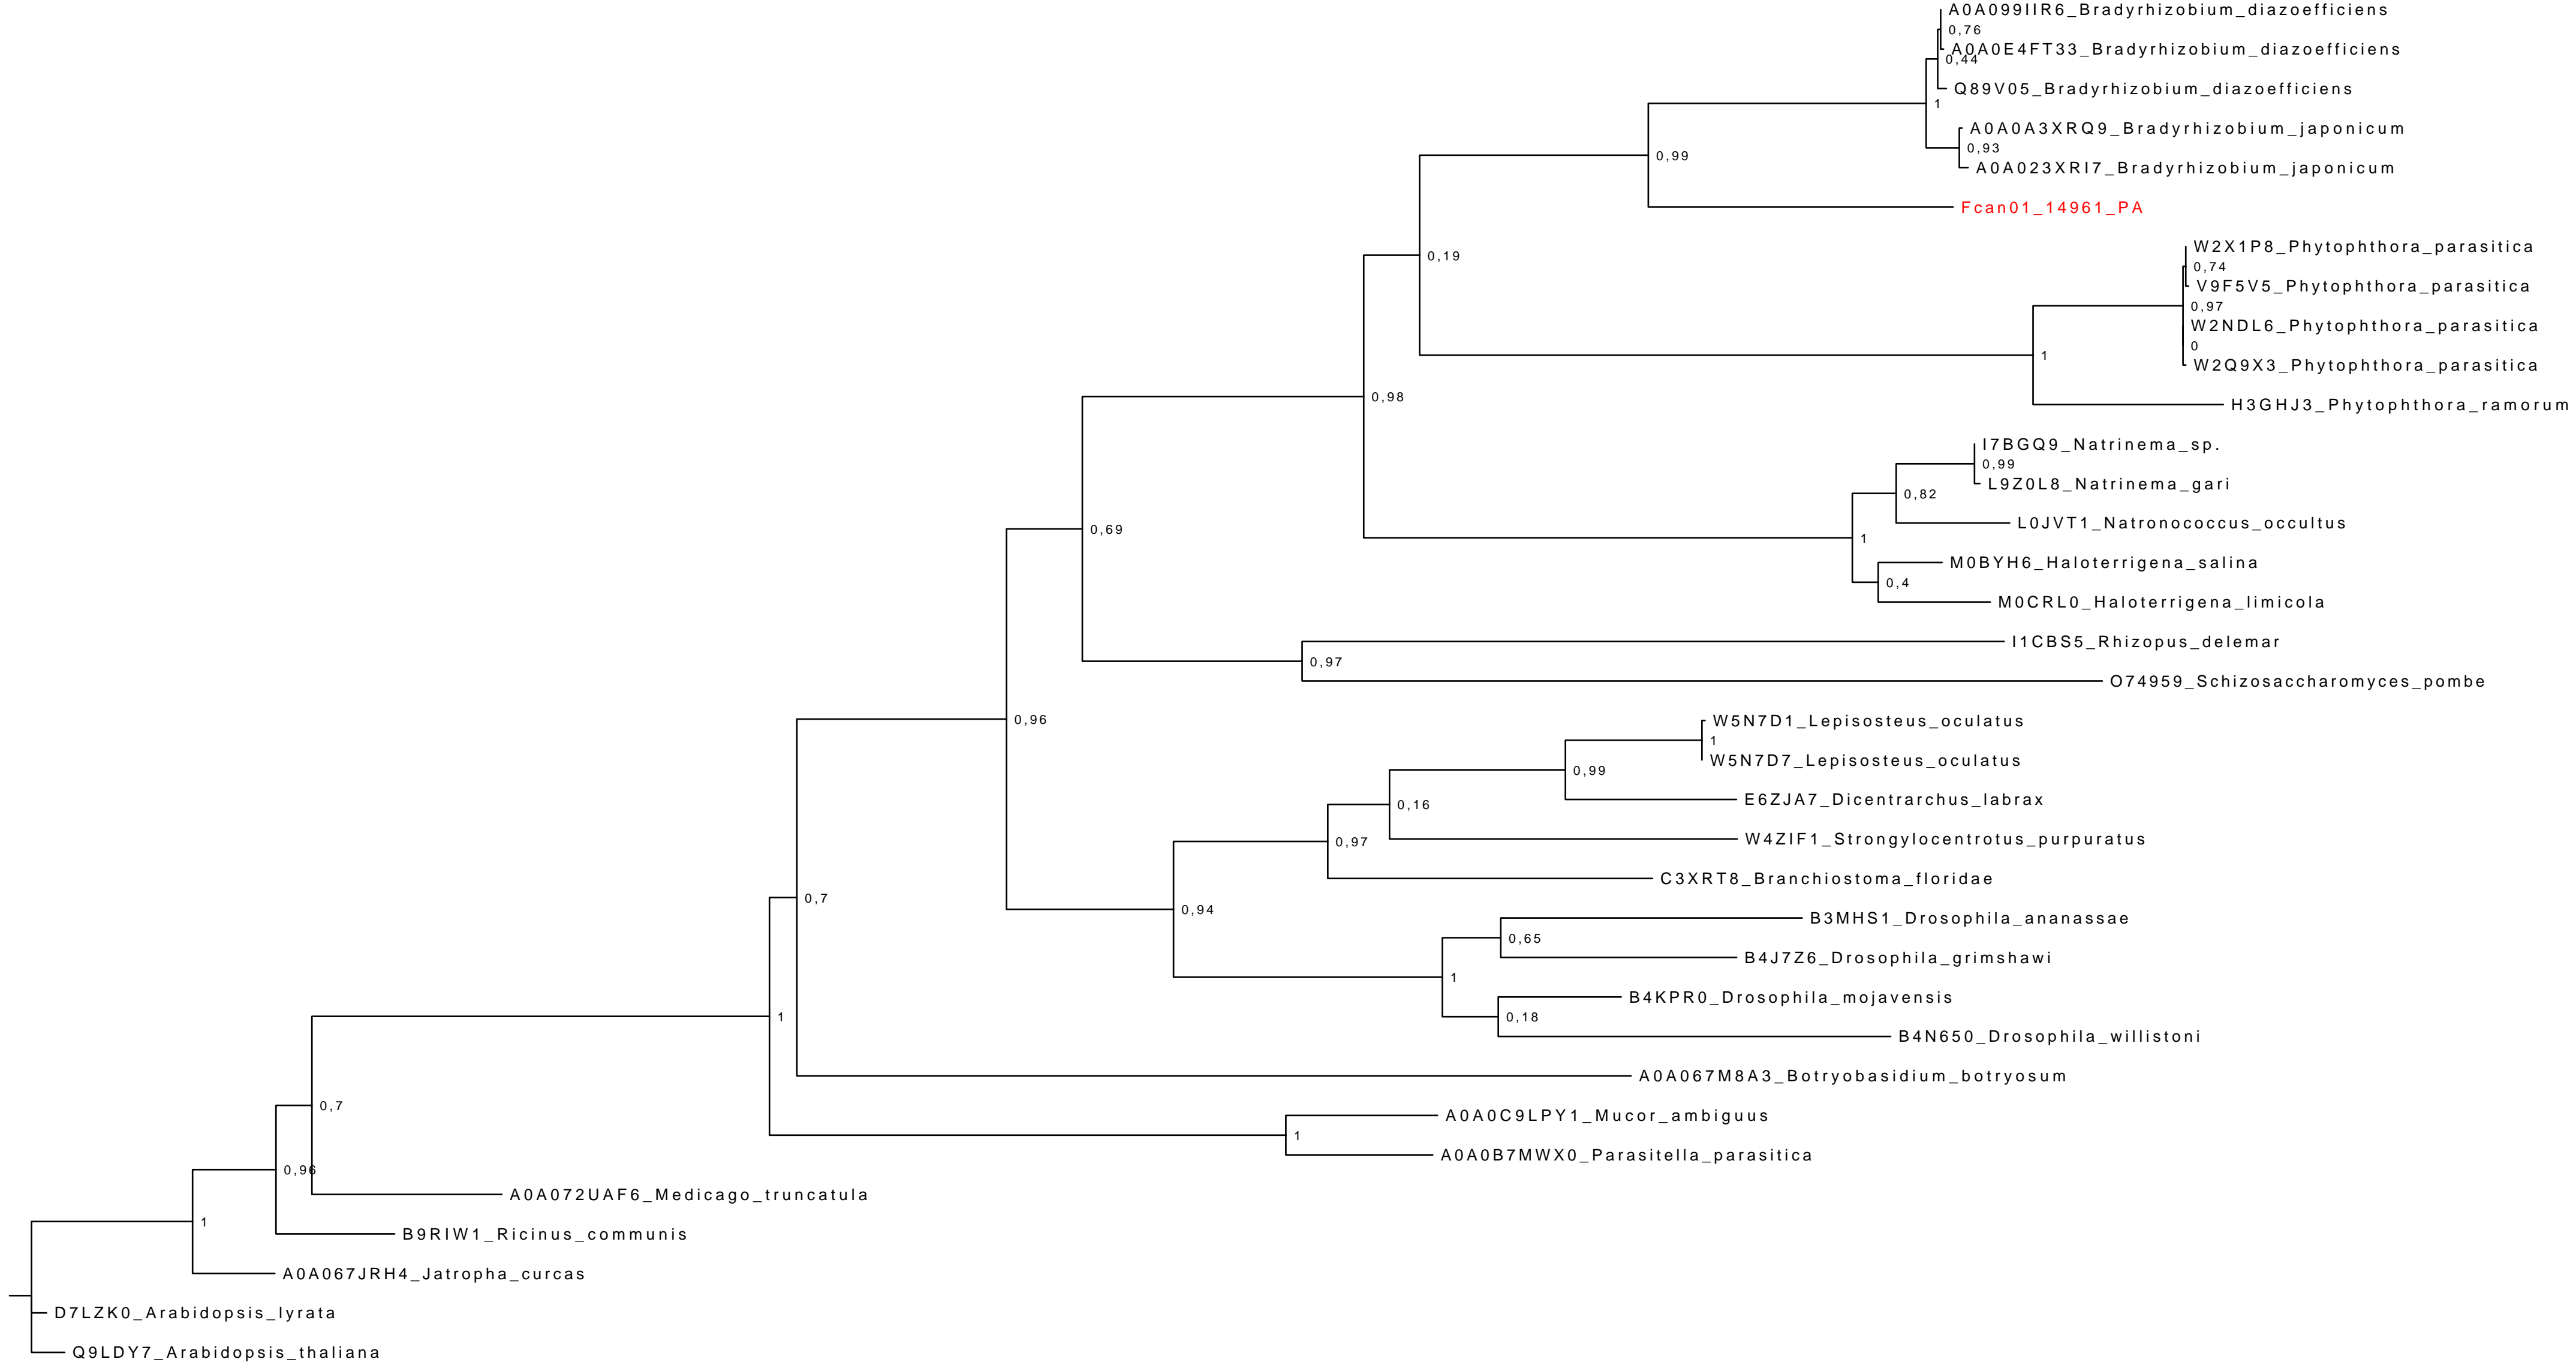

0.3

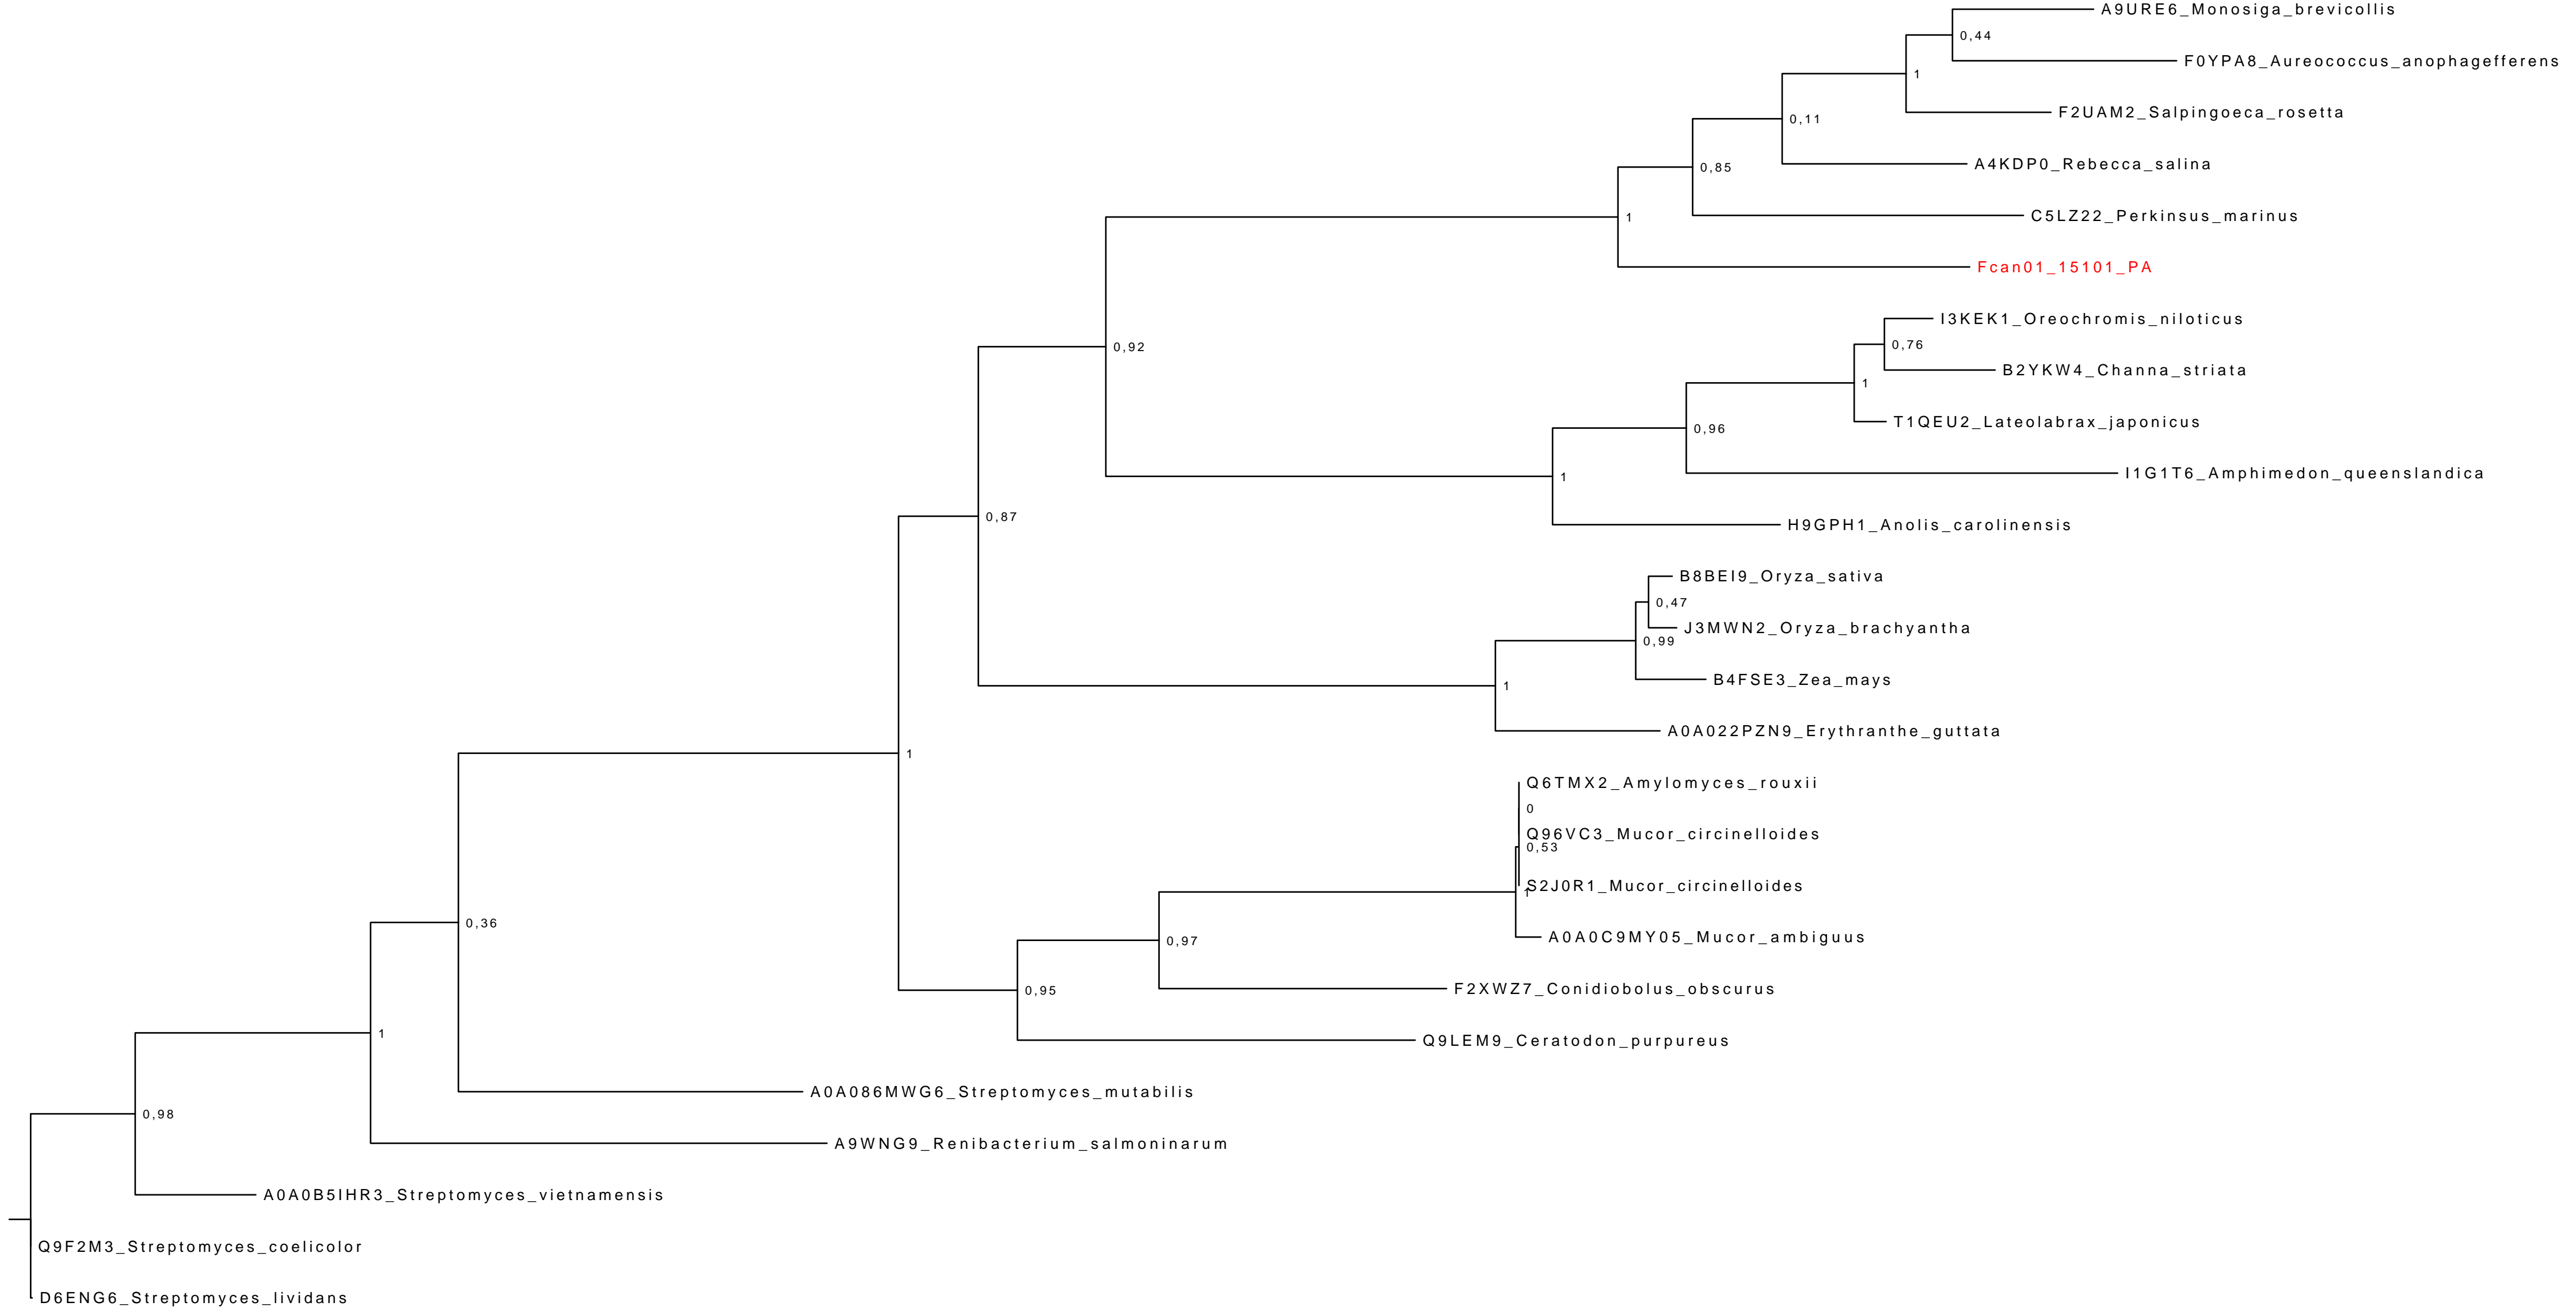

0.5

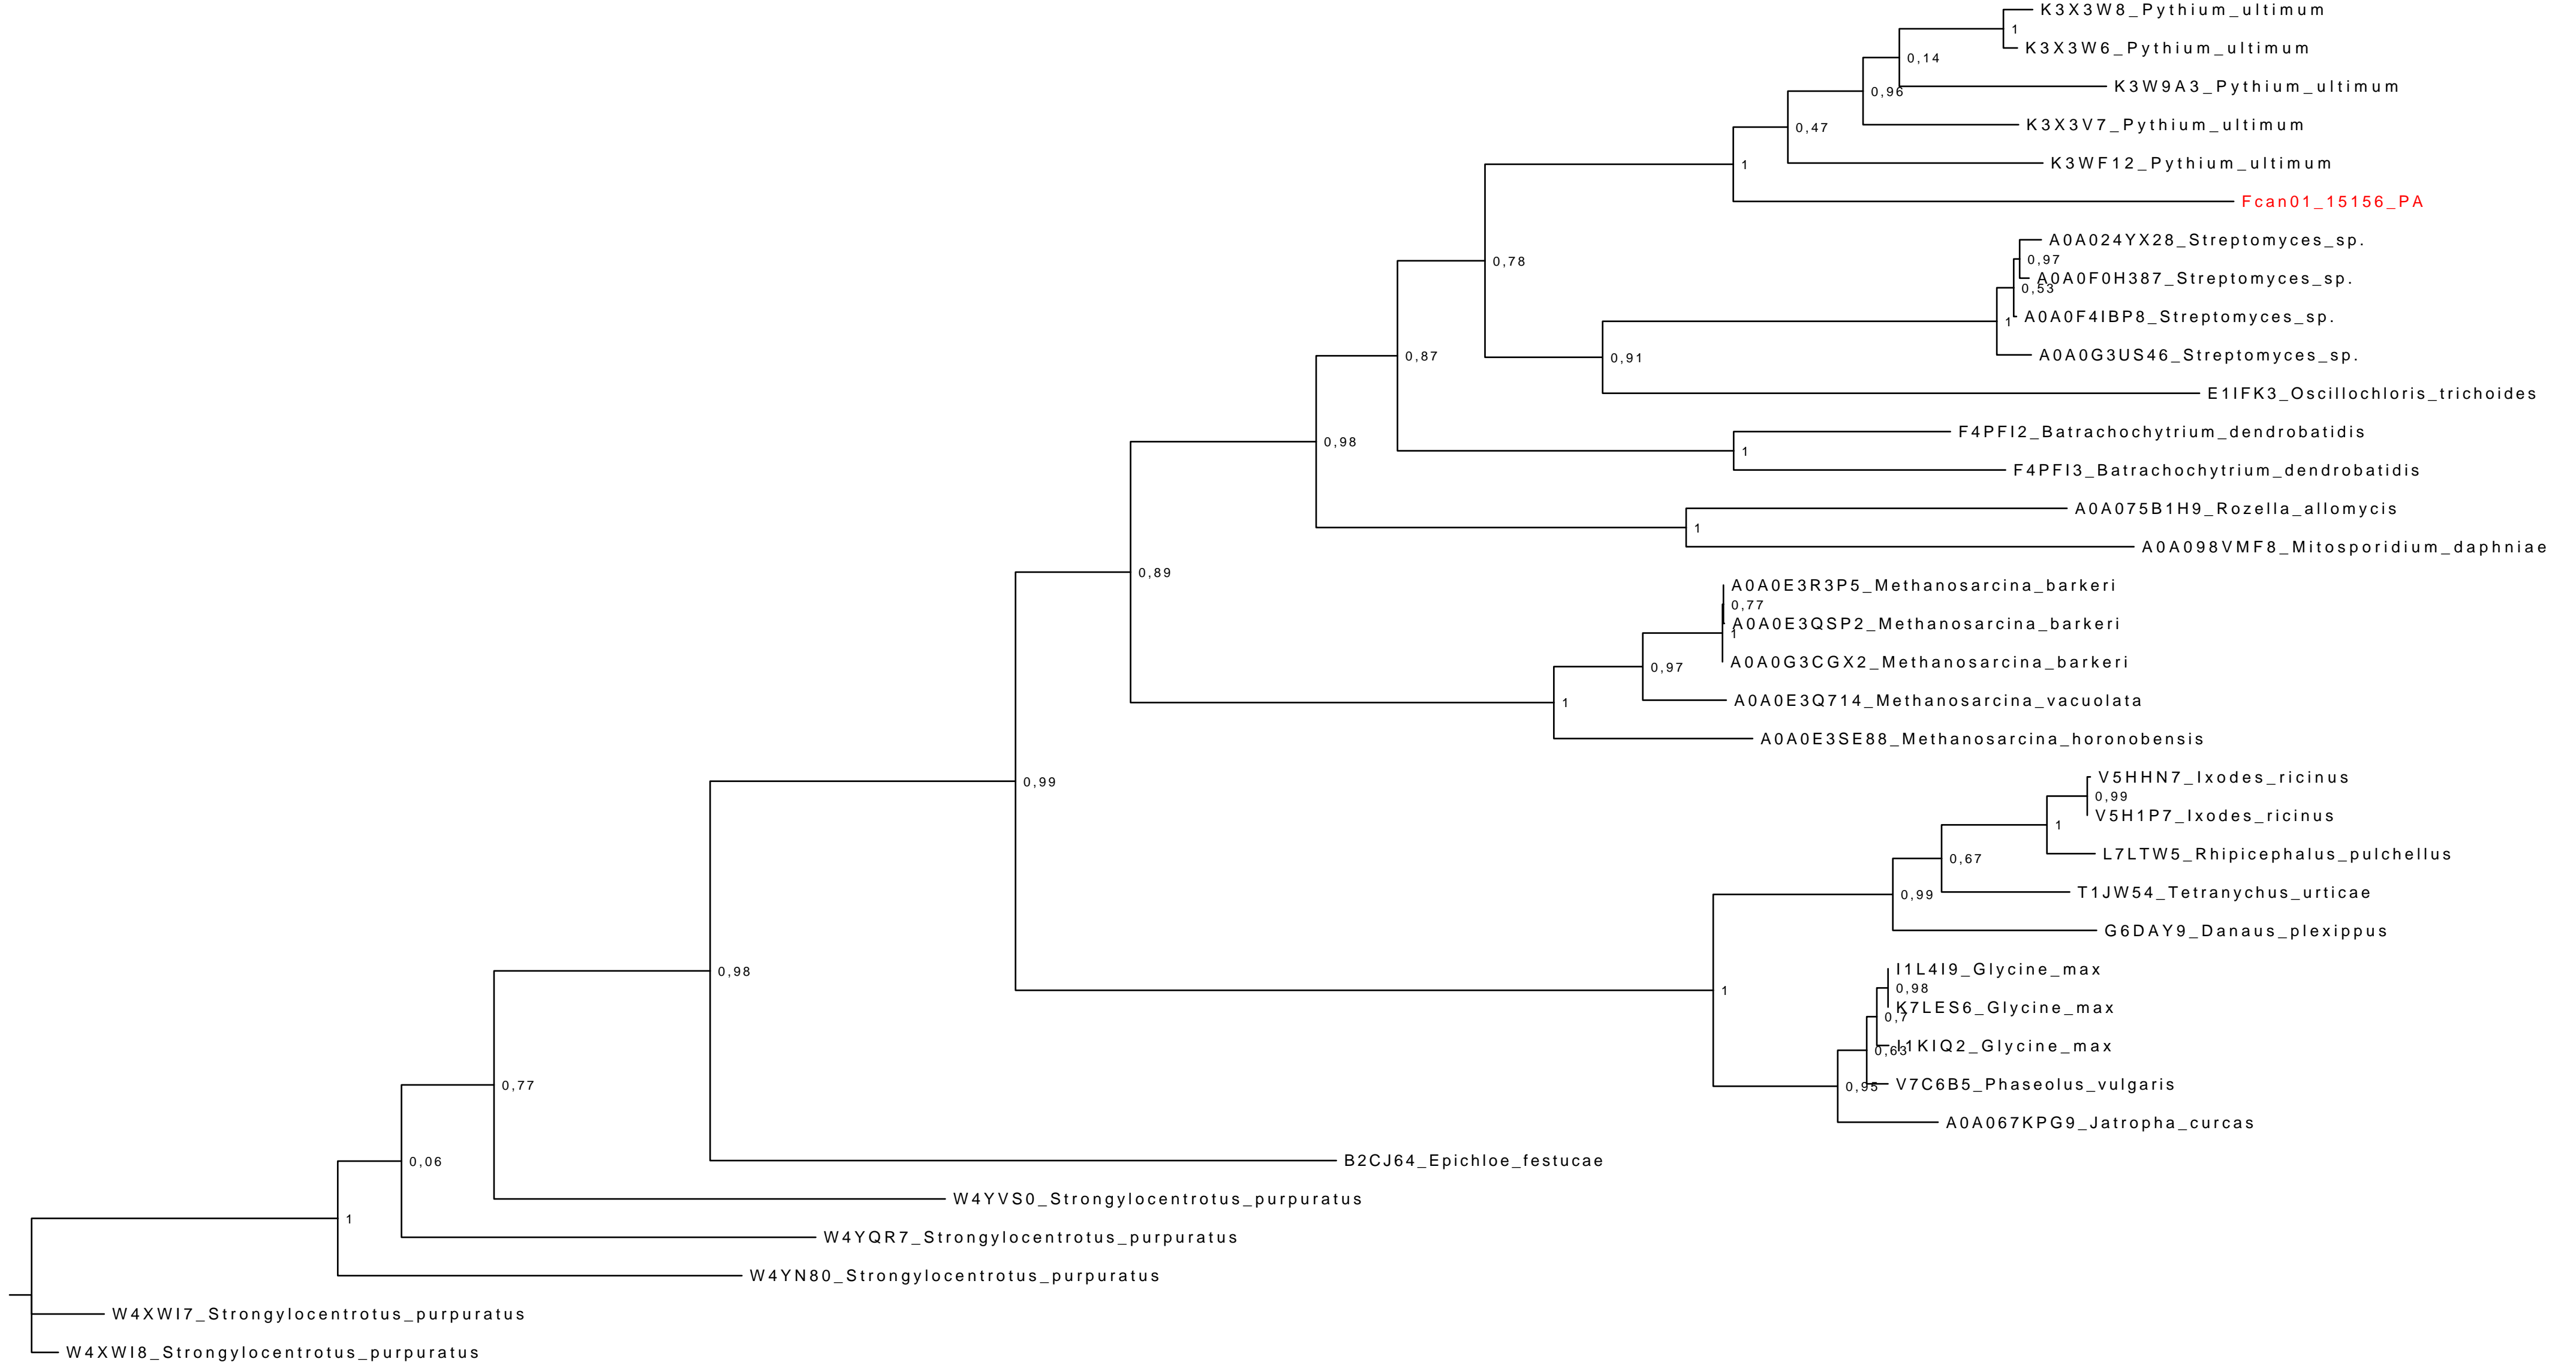

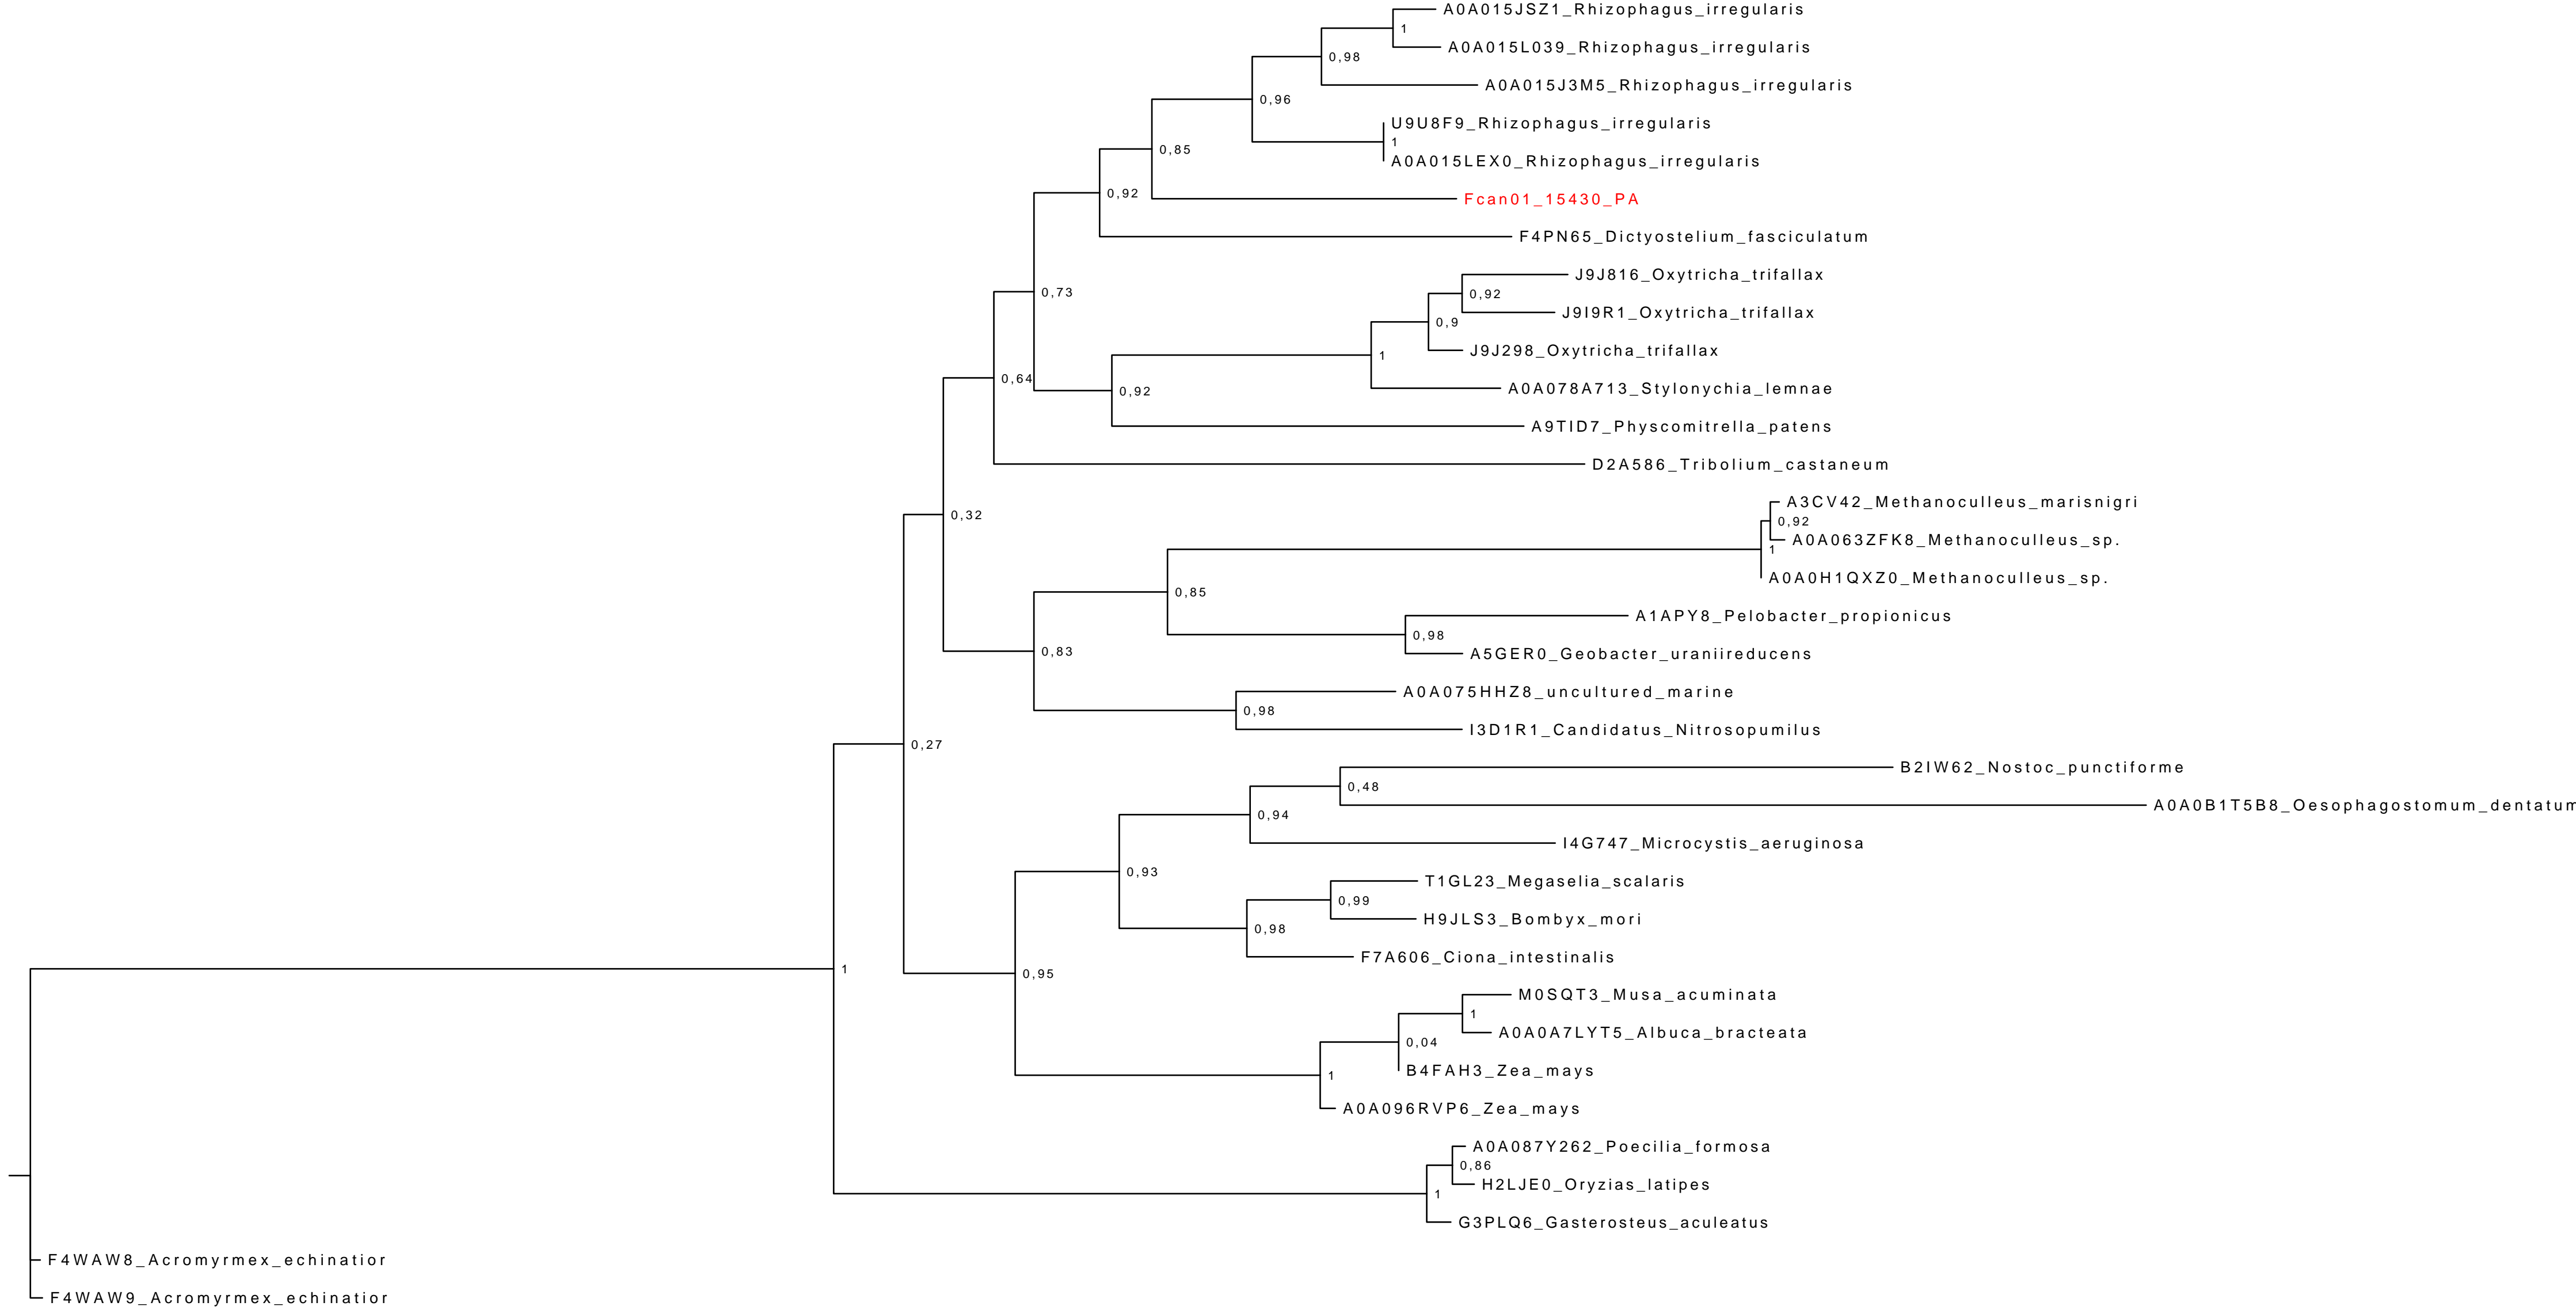

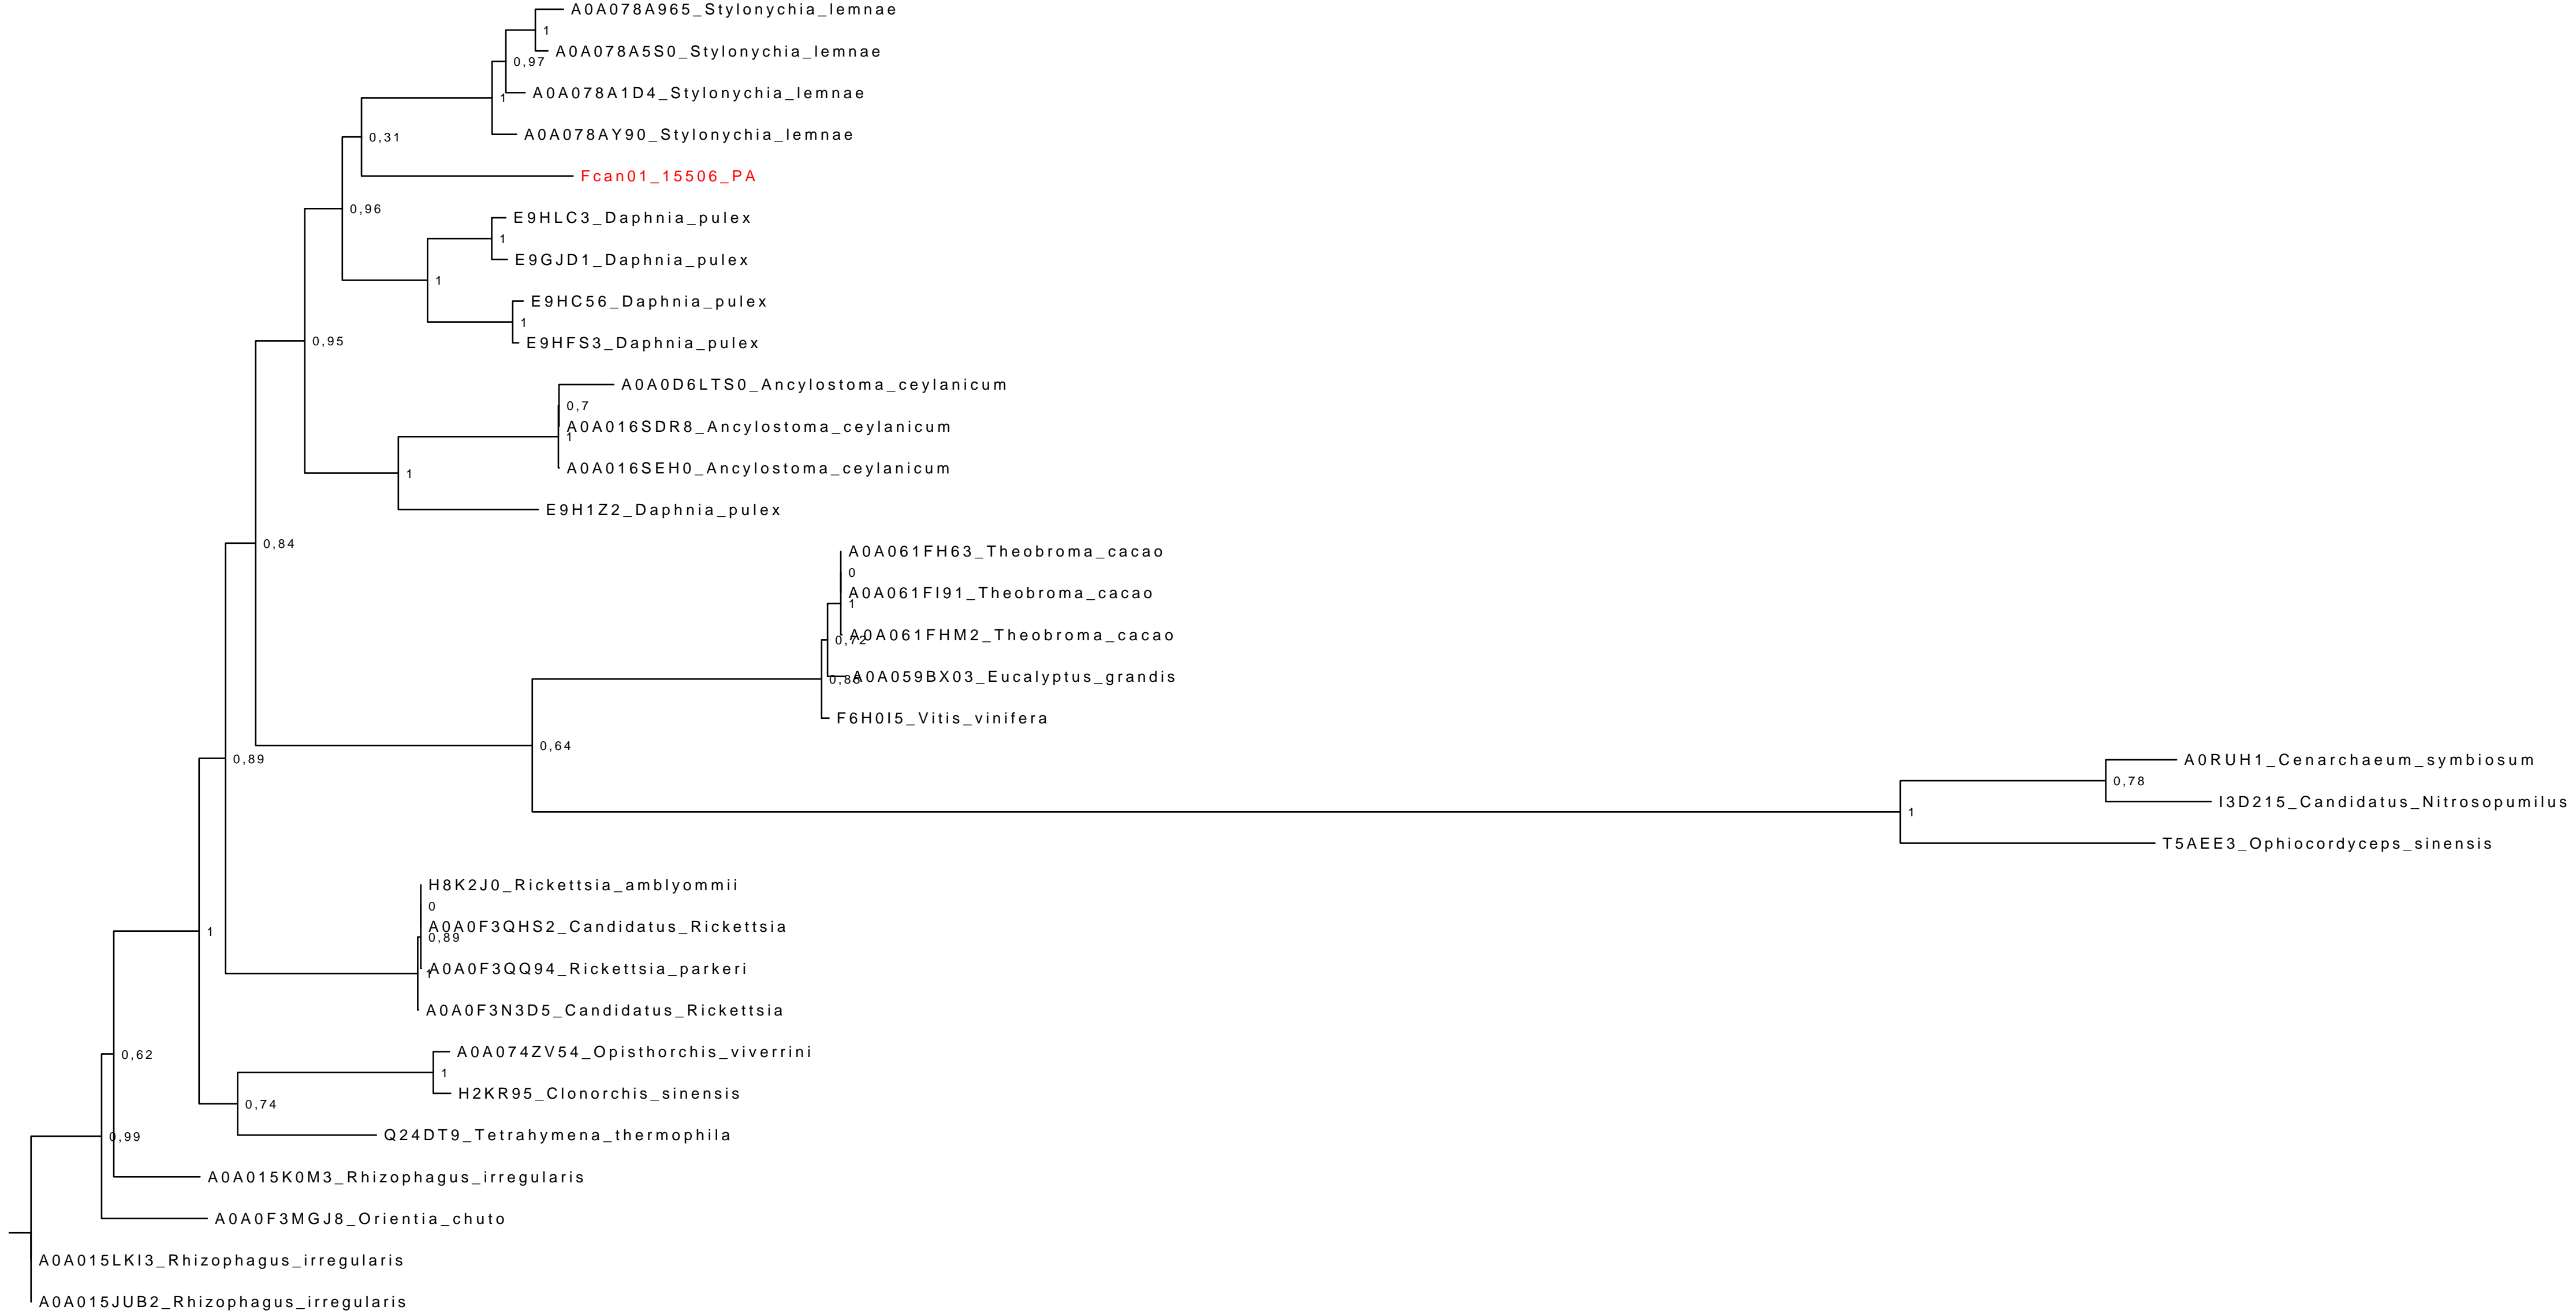

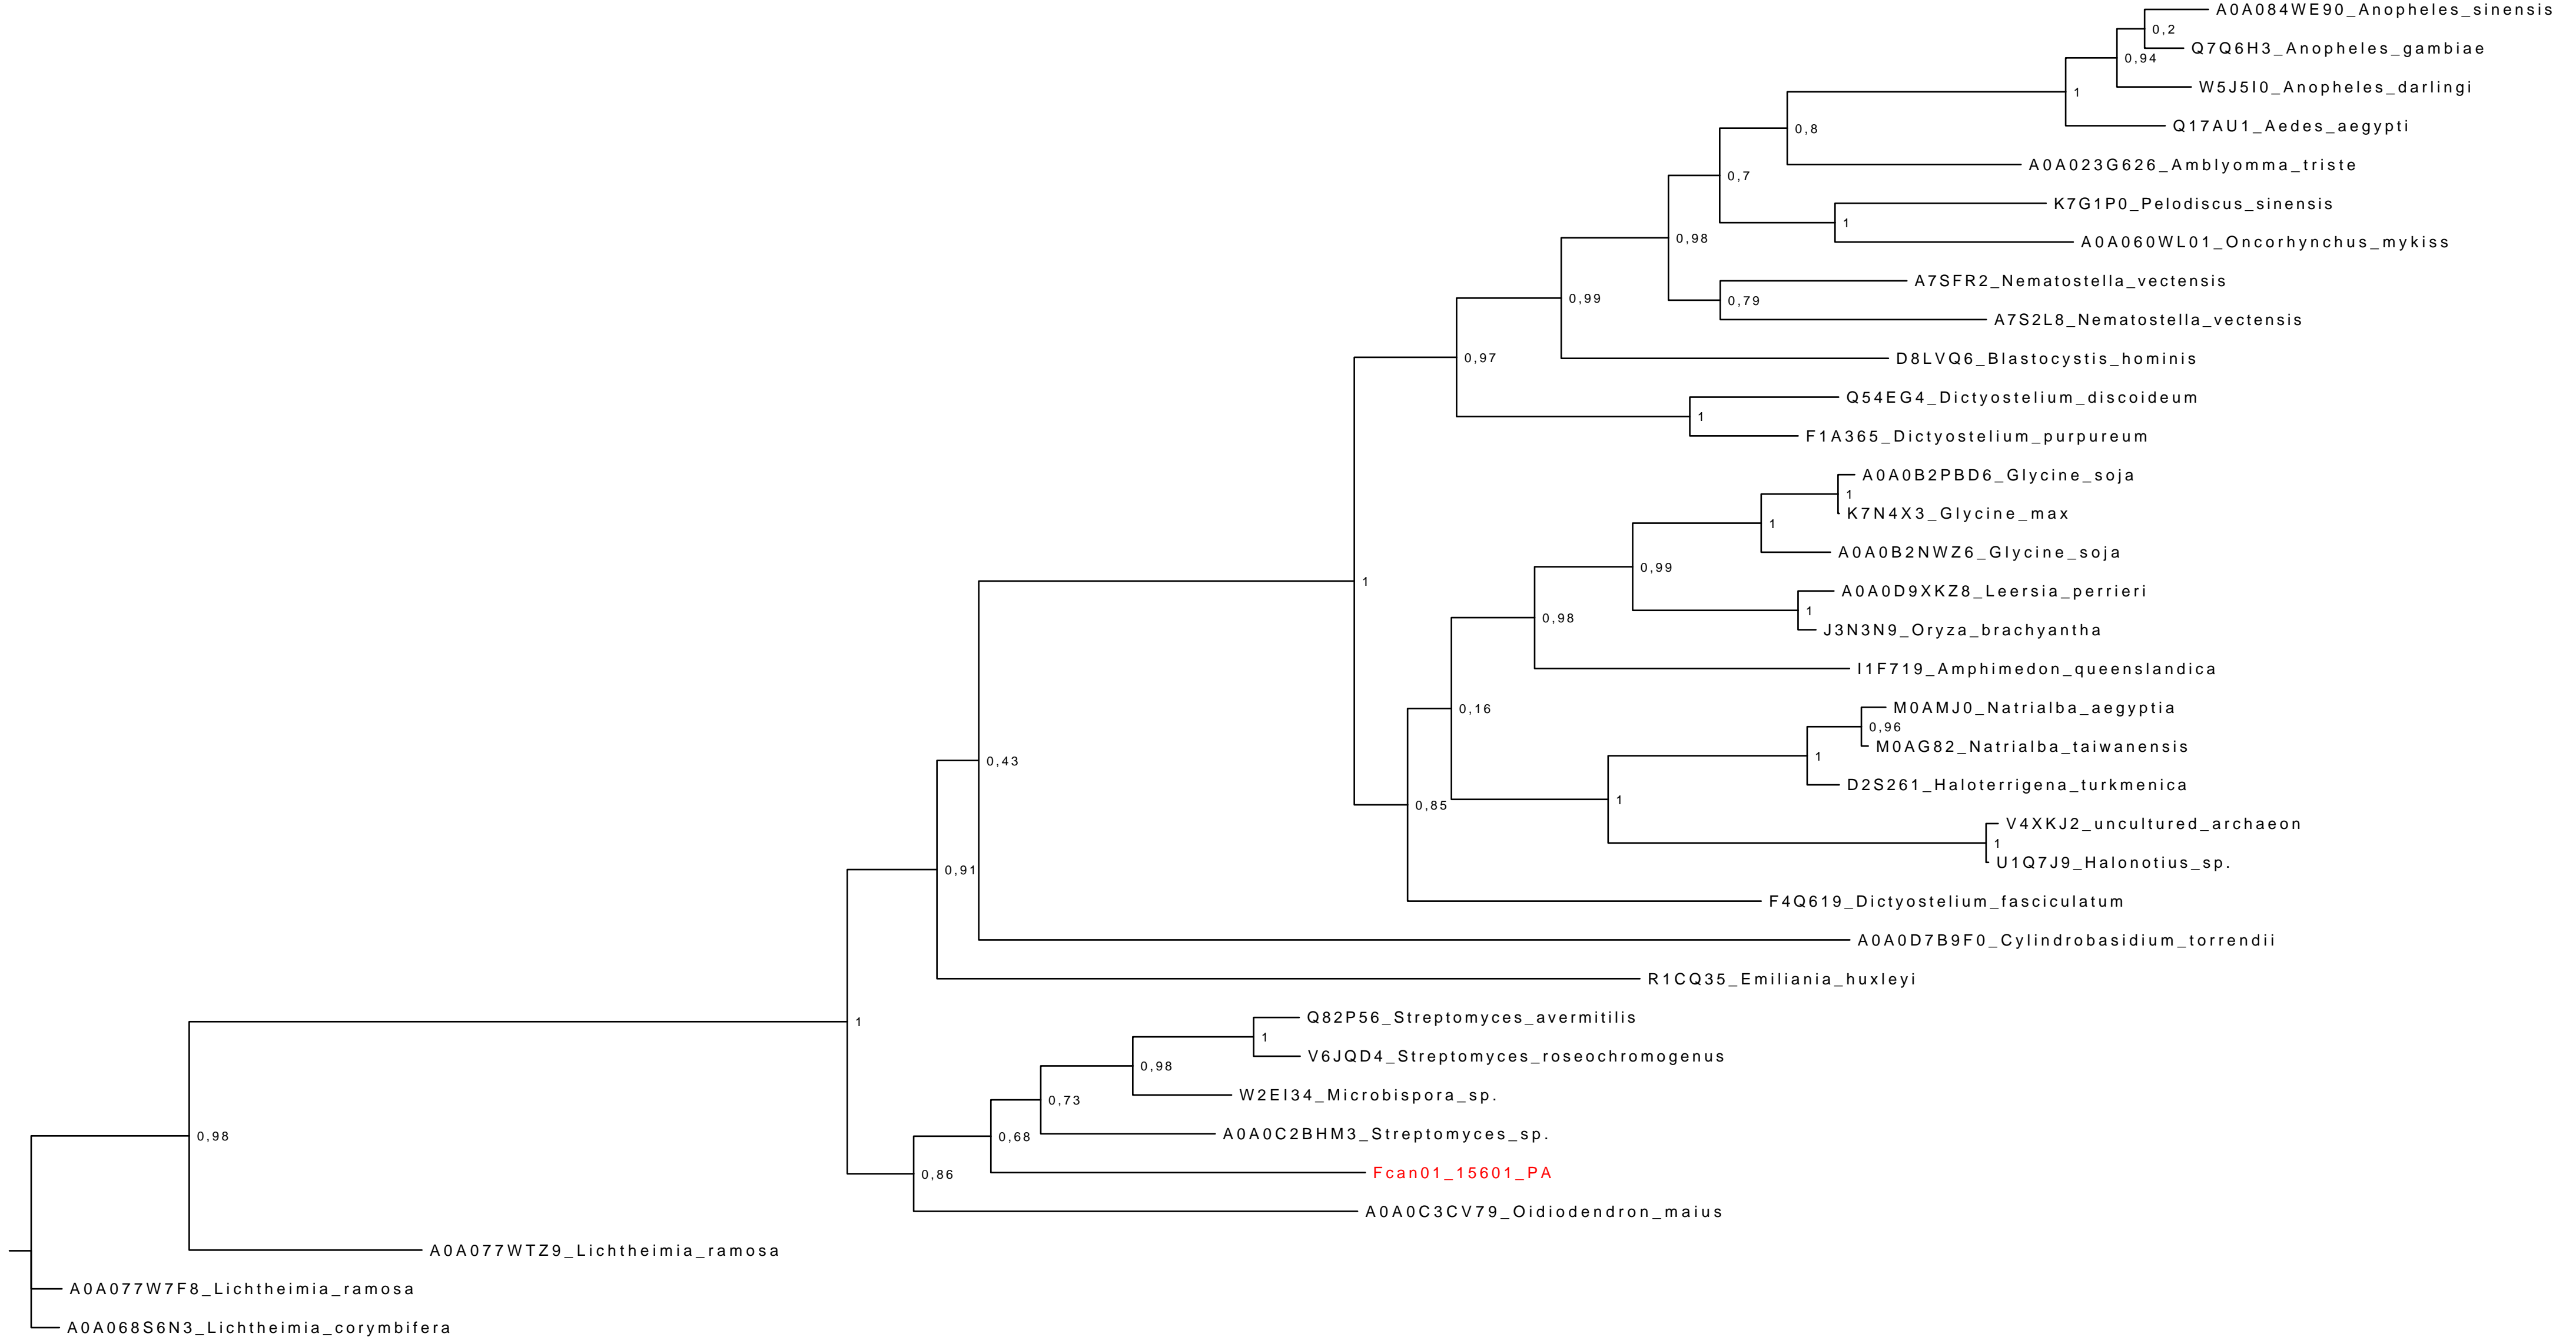

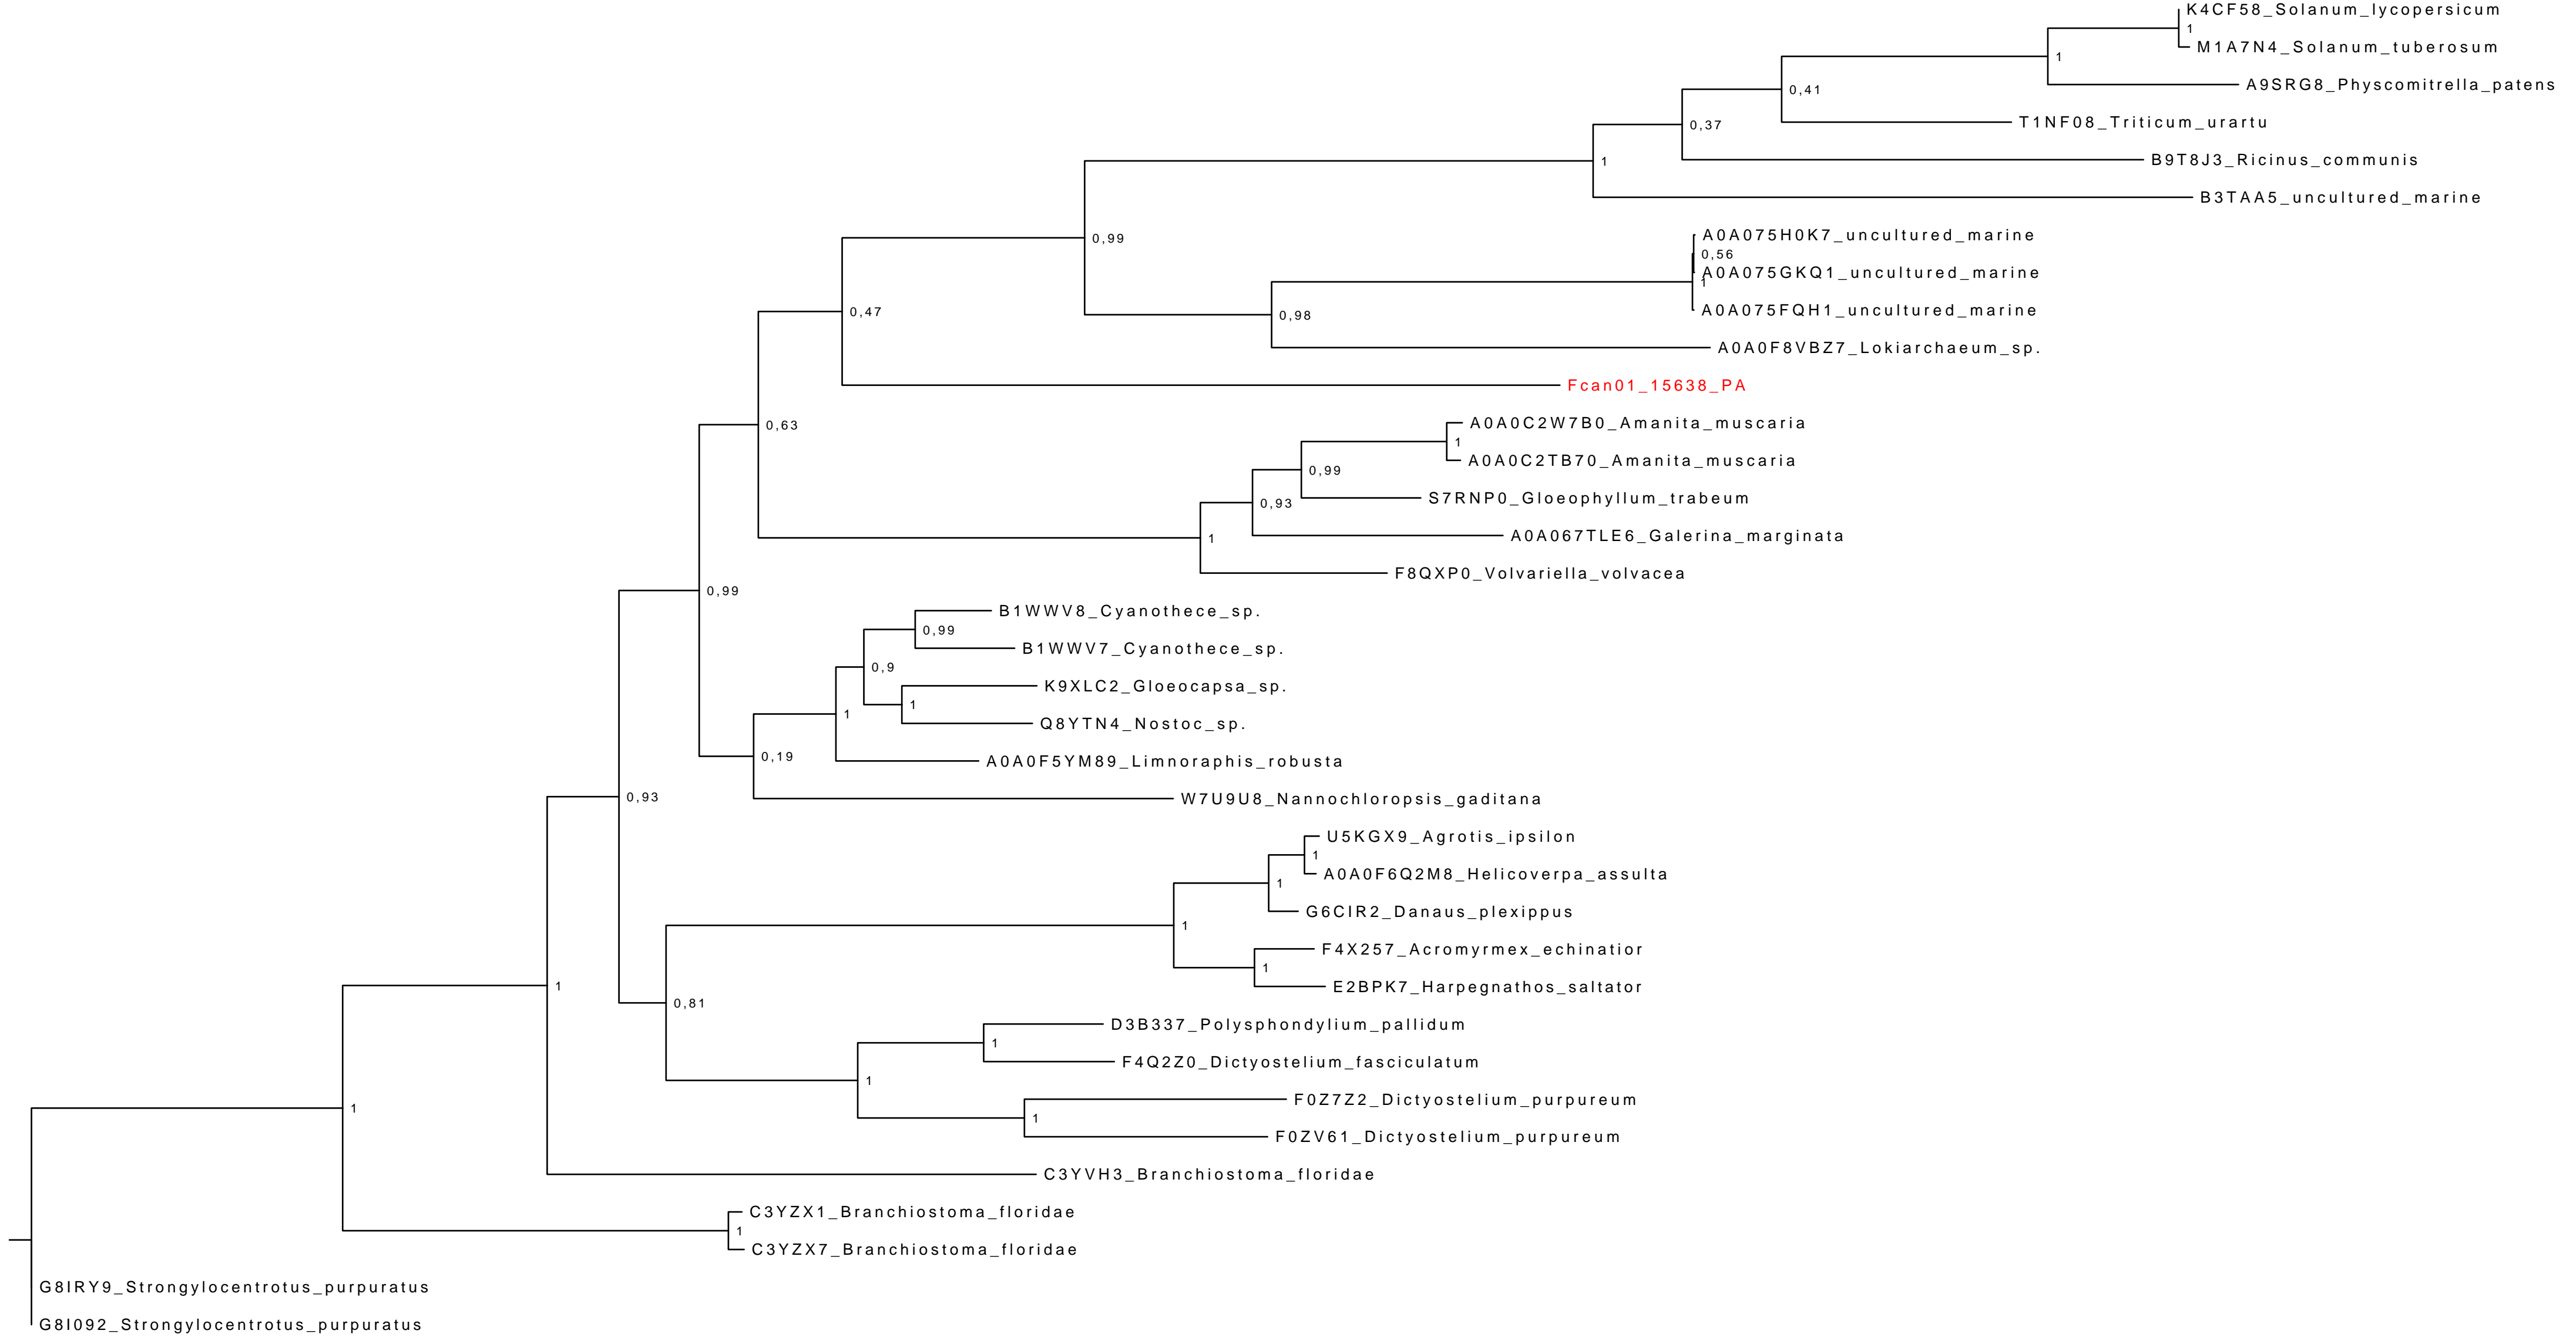

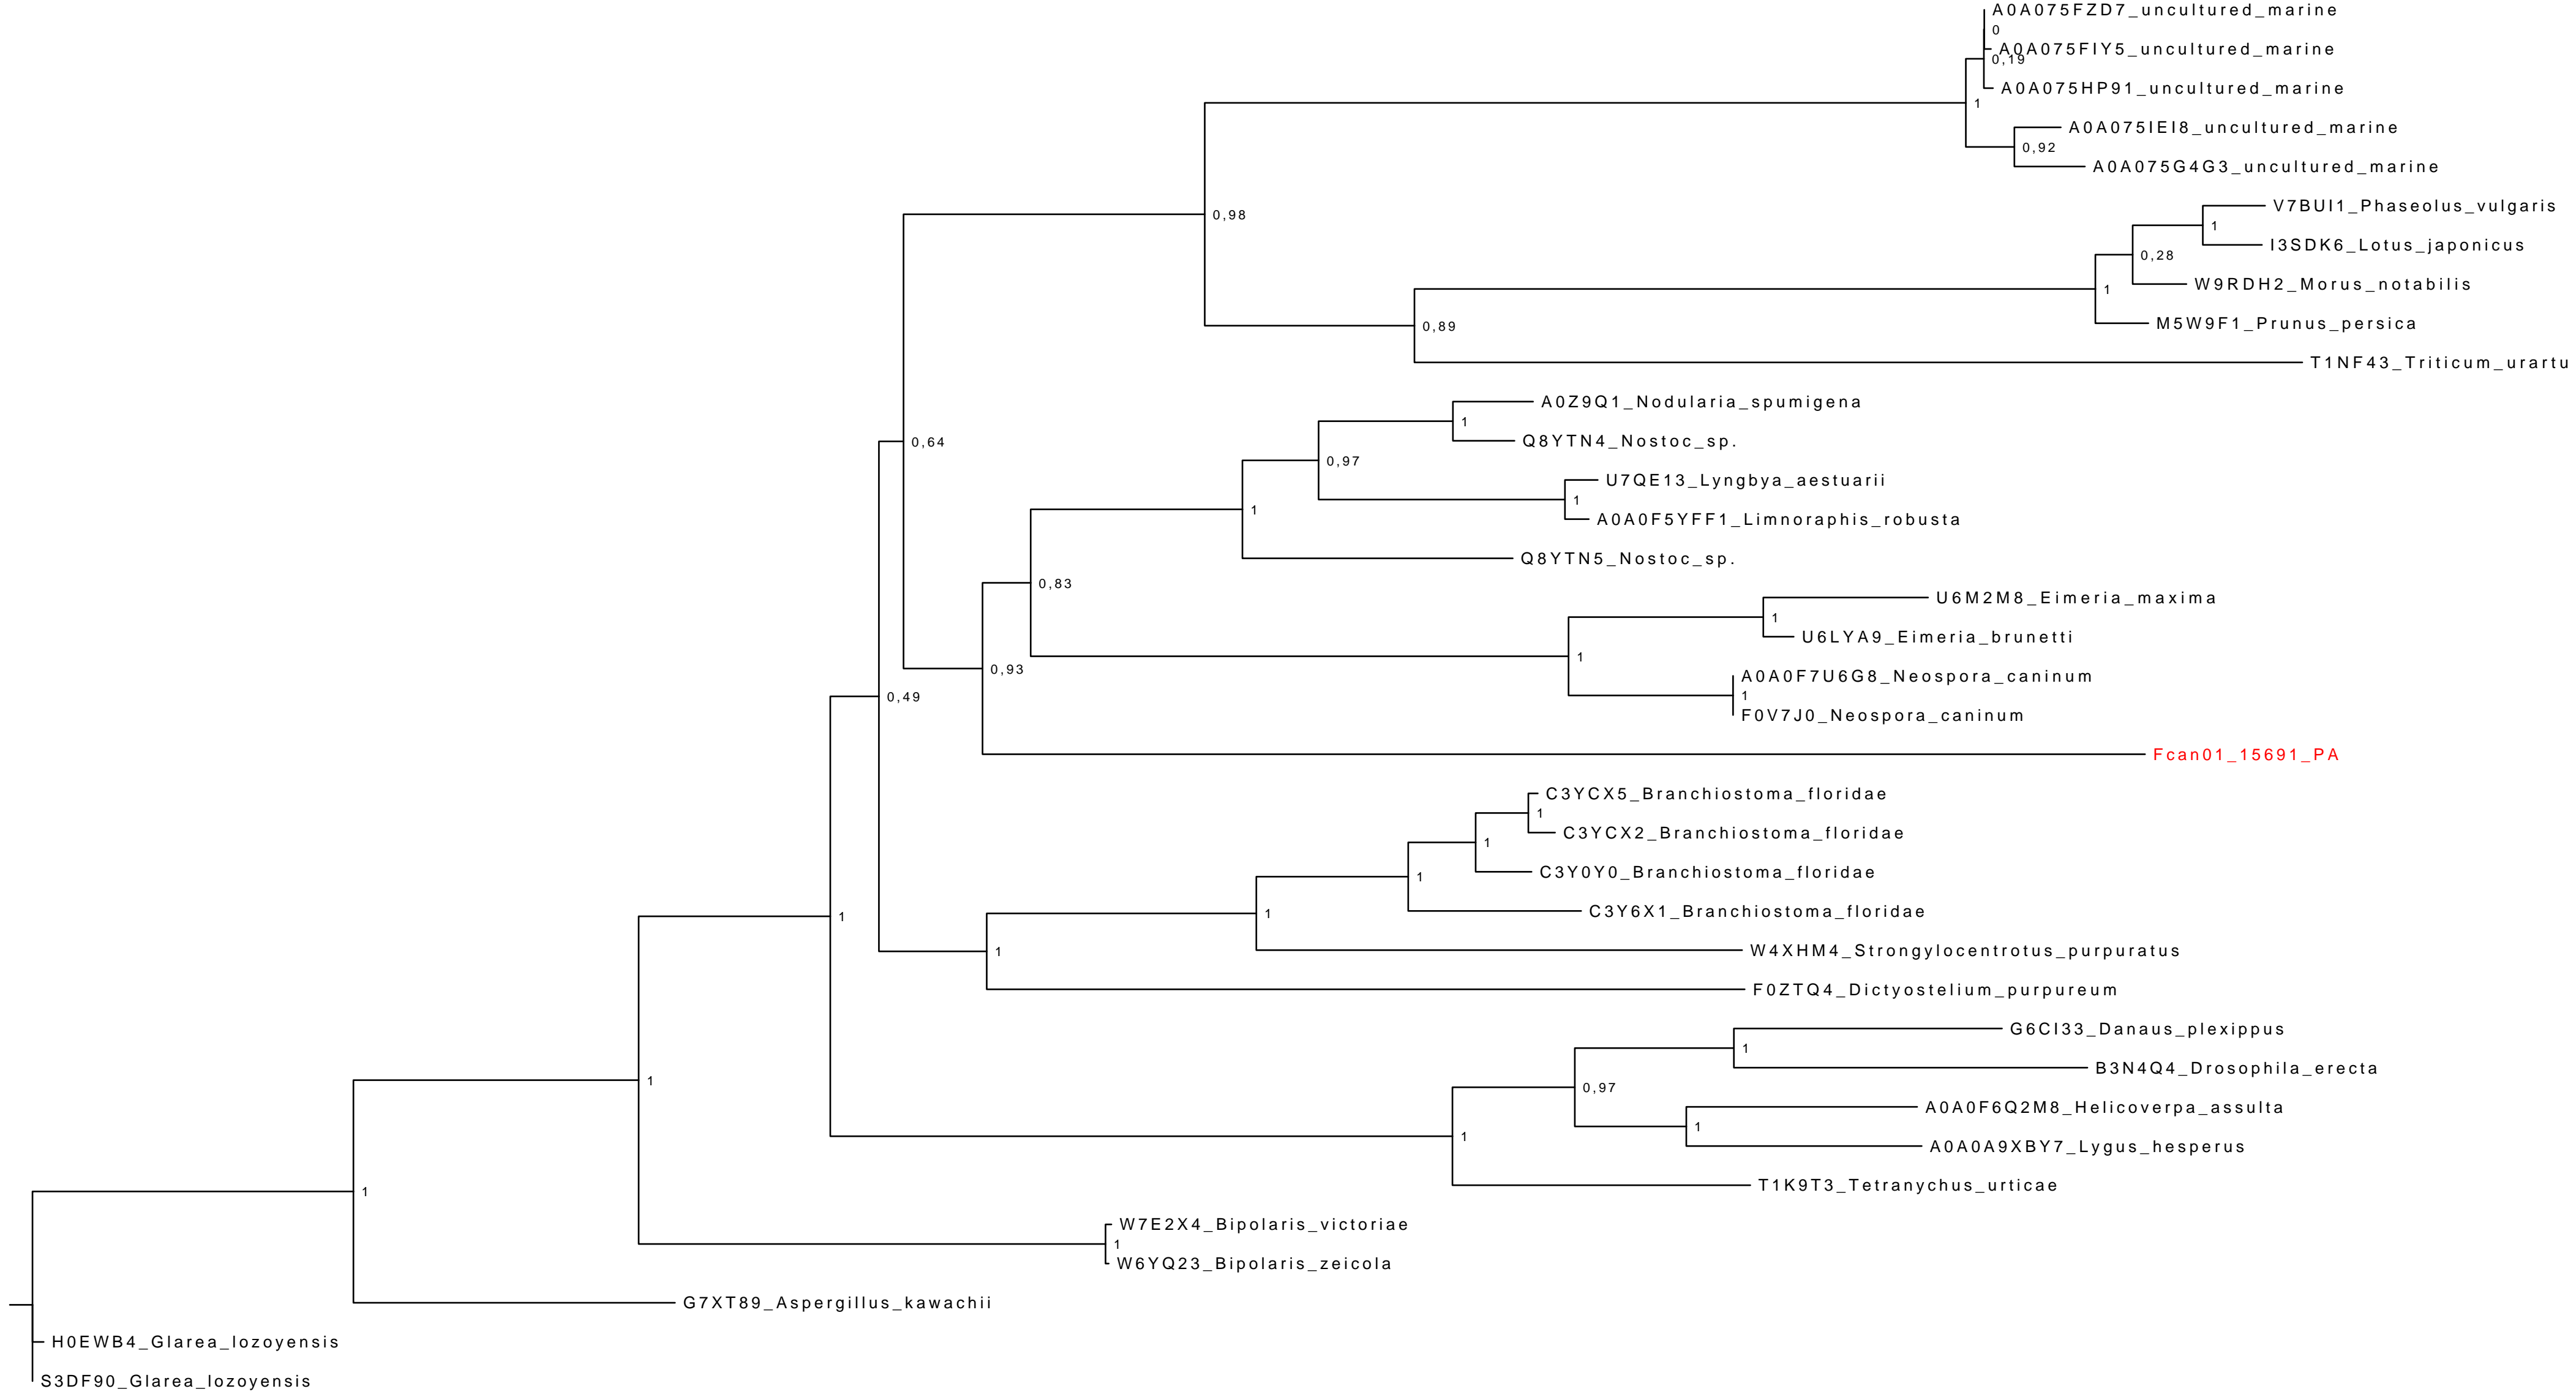



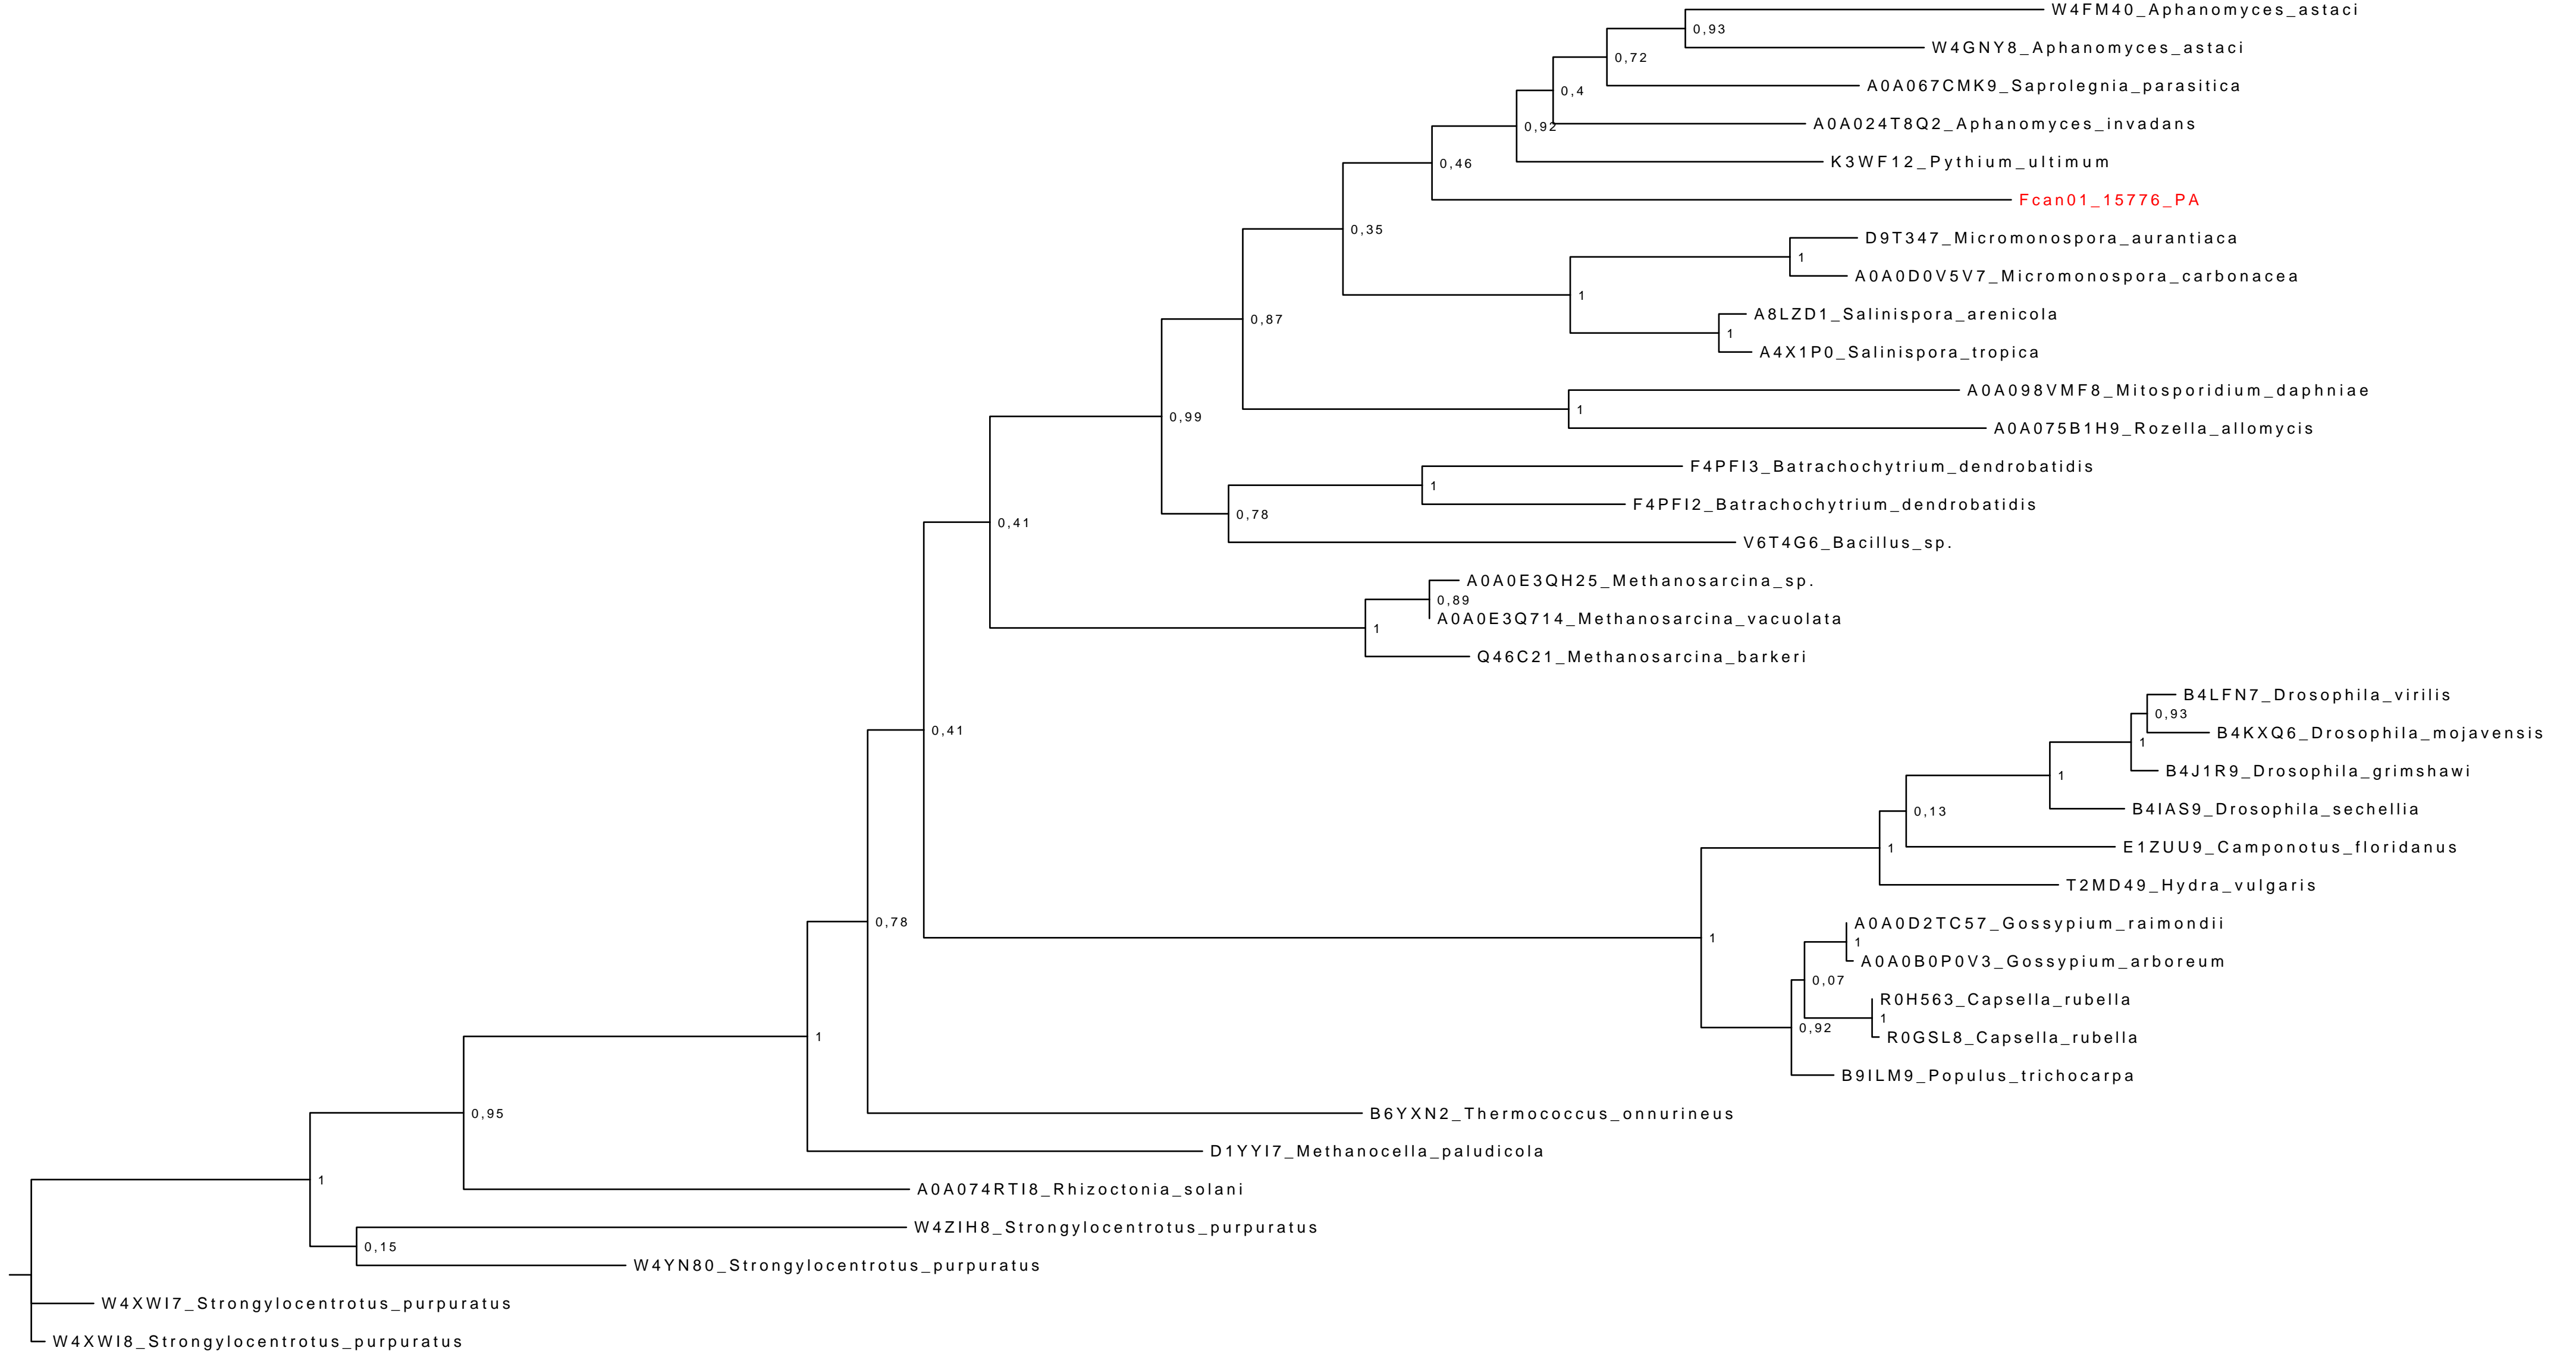

0.5



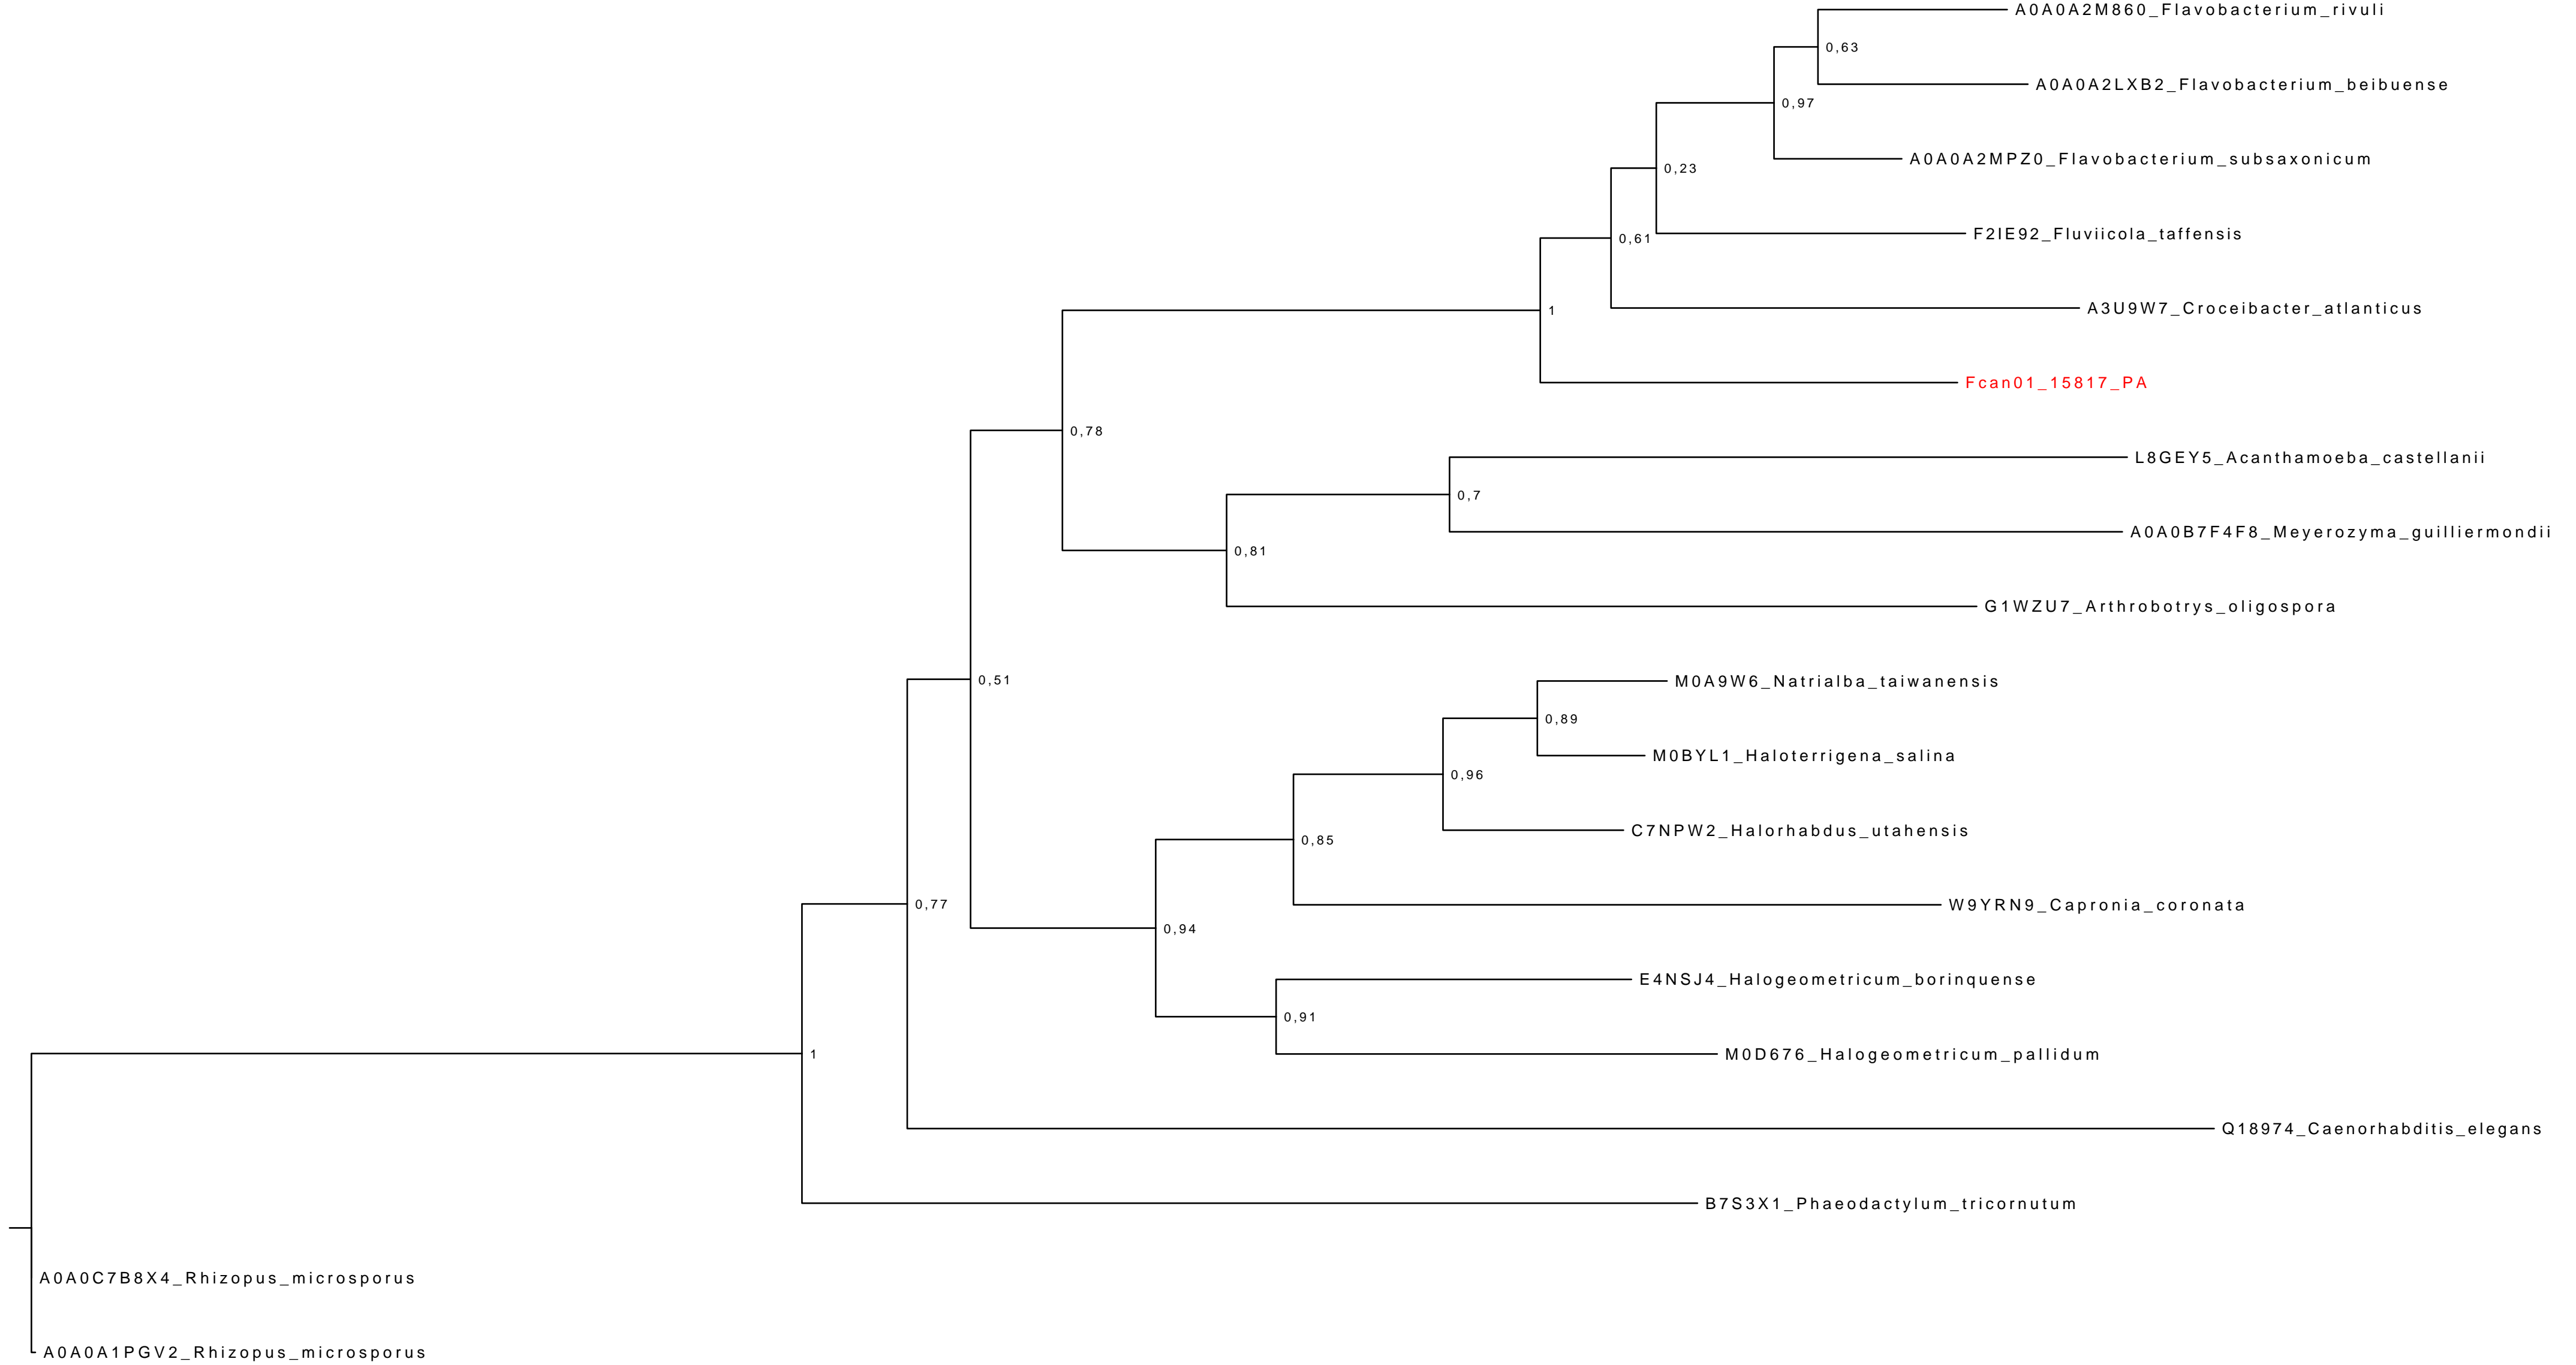

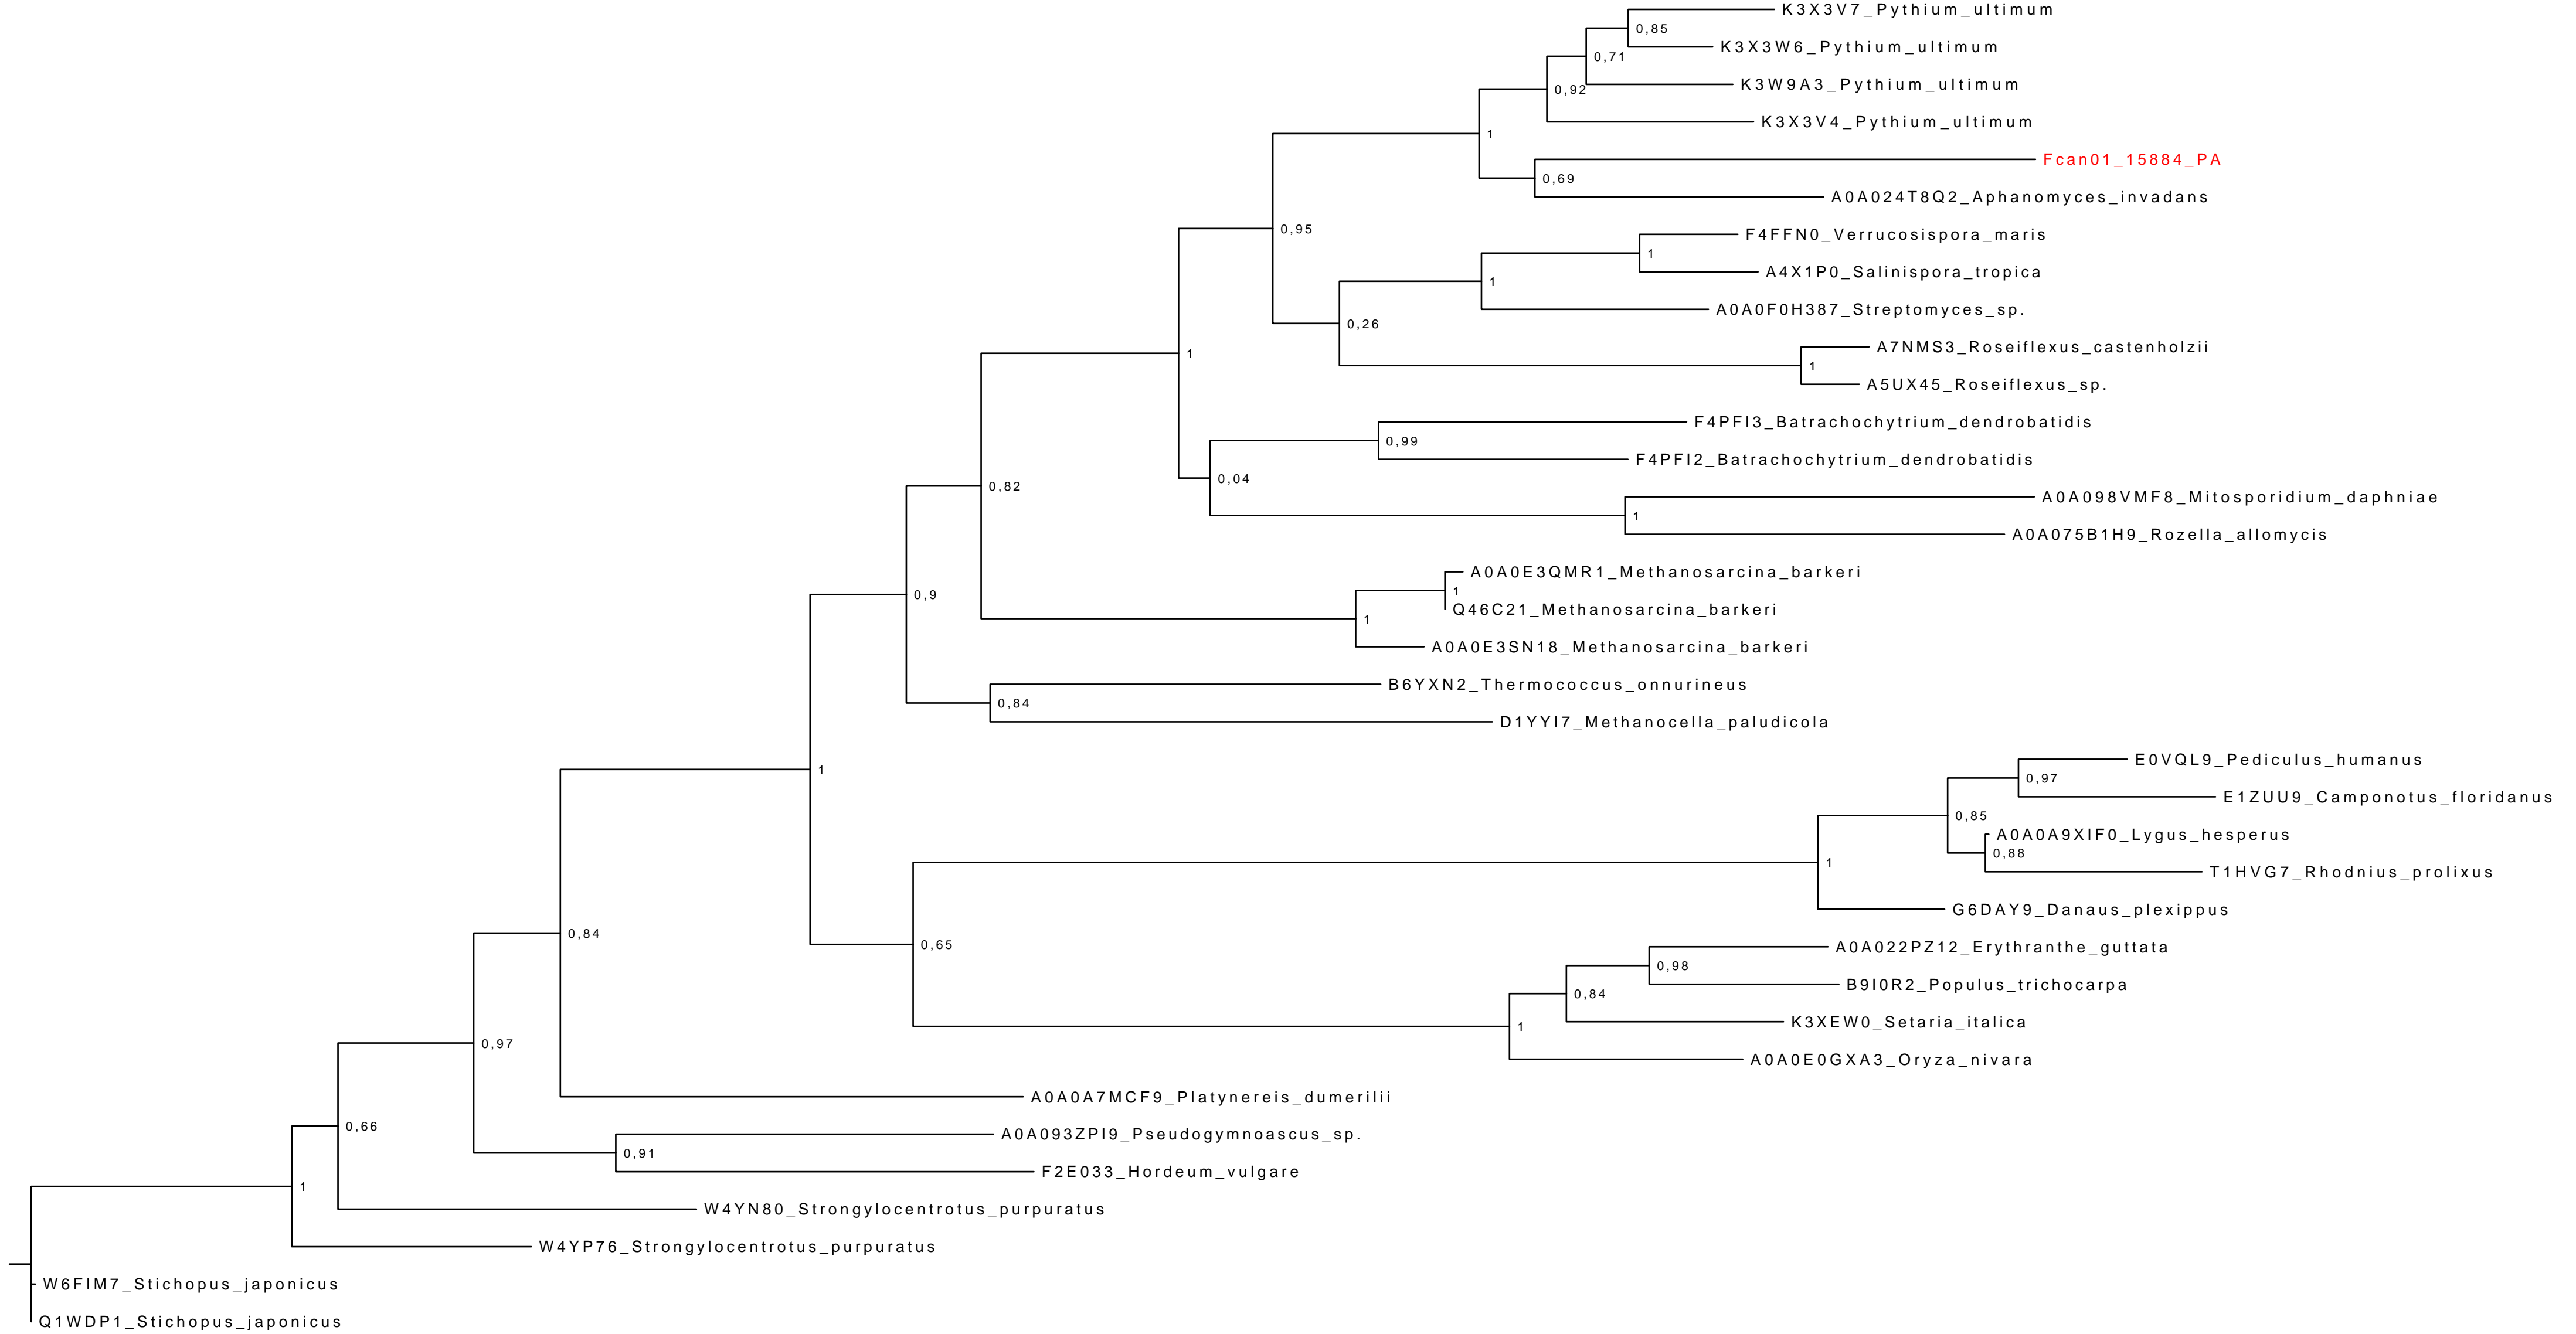

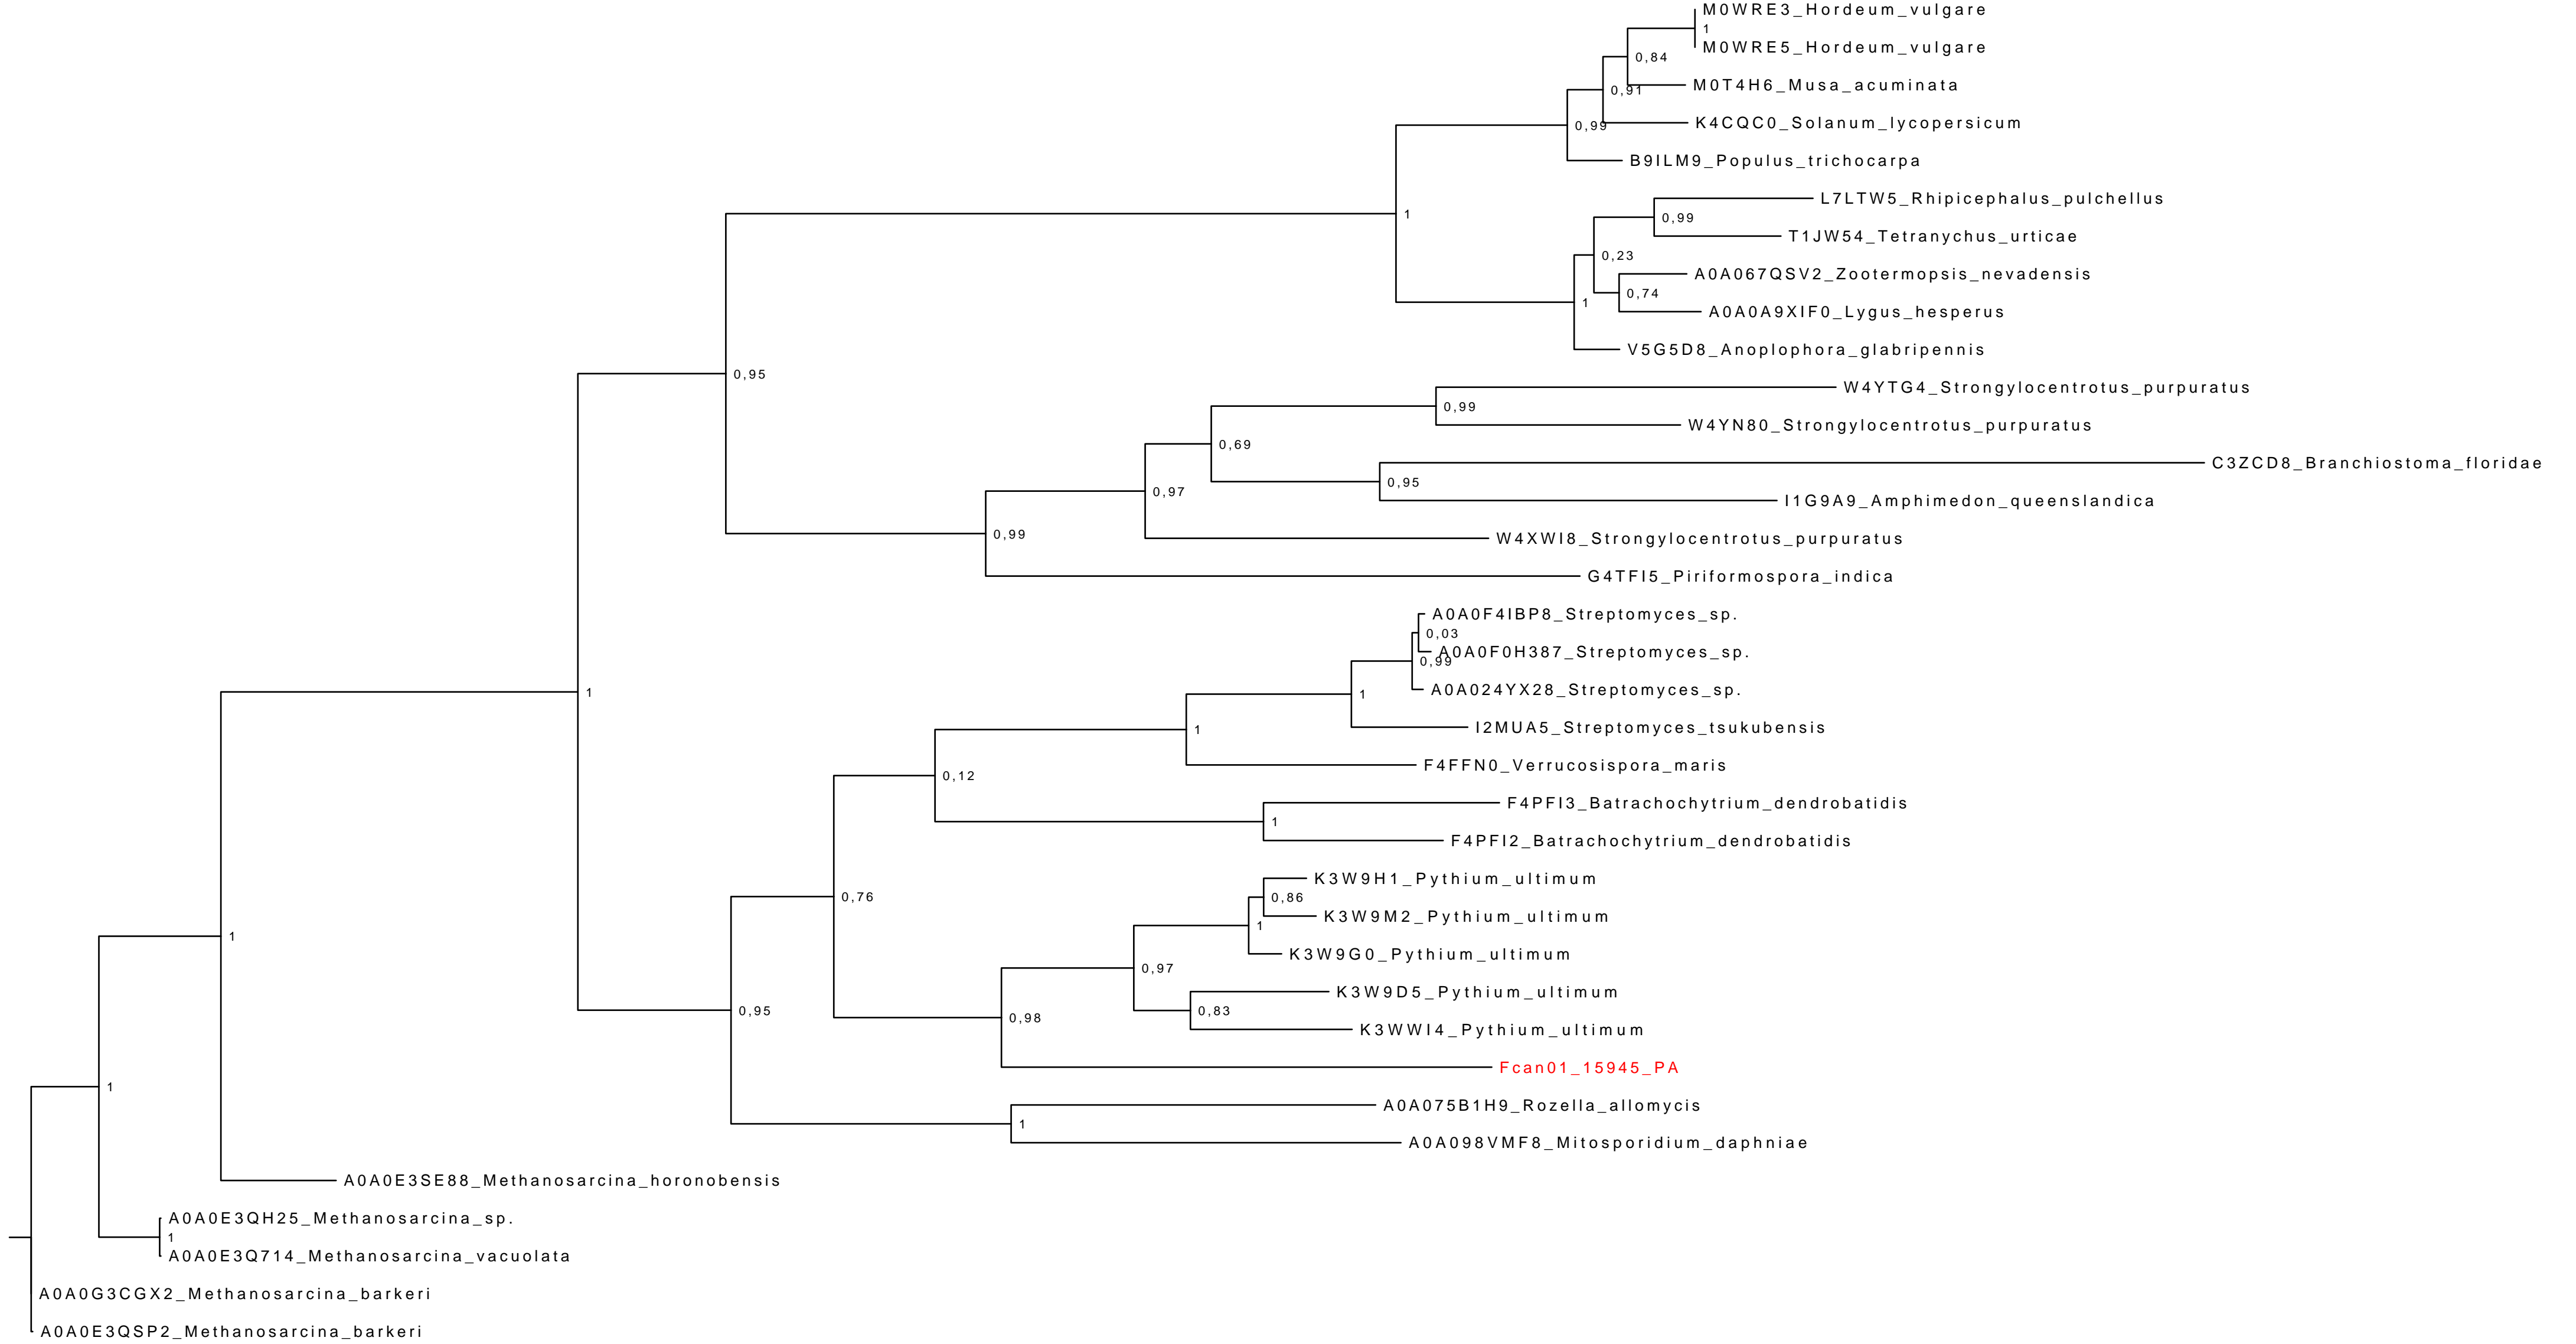

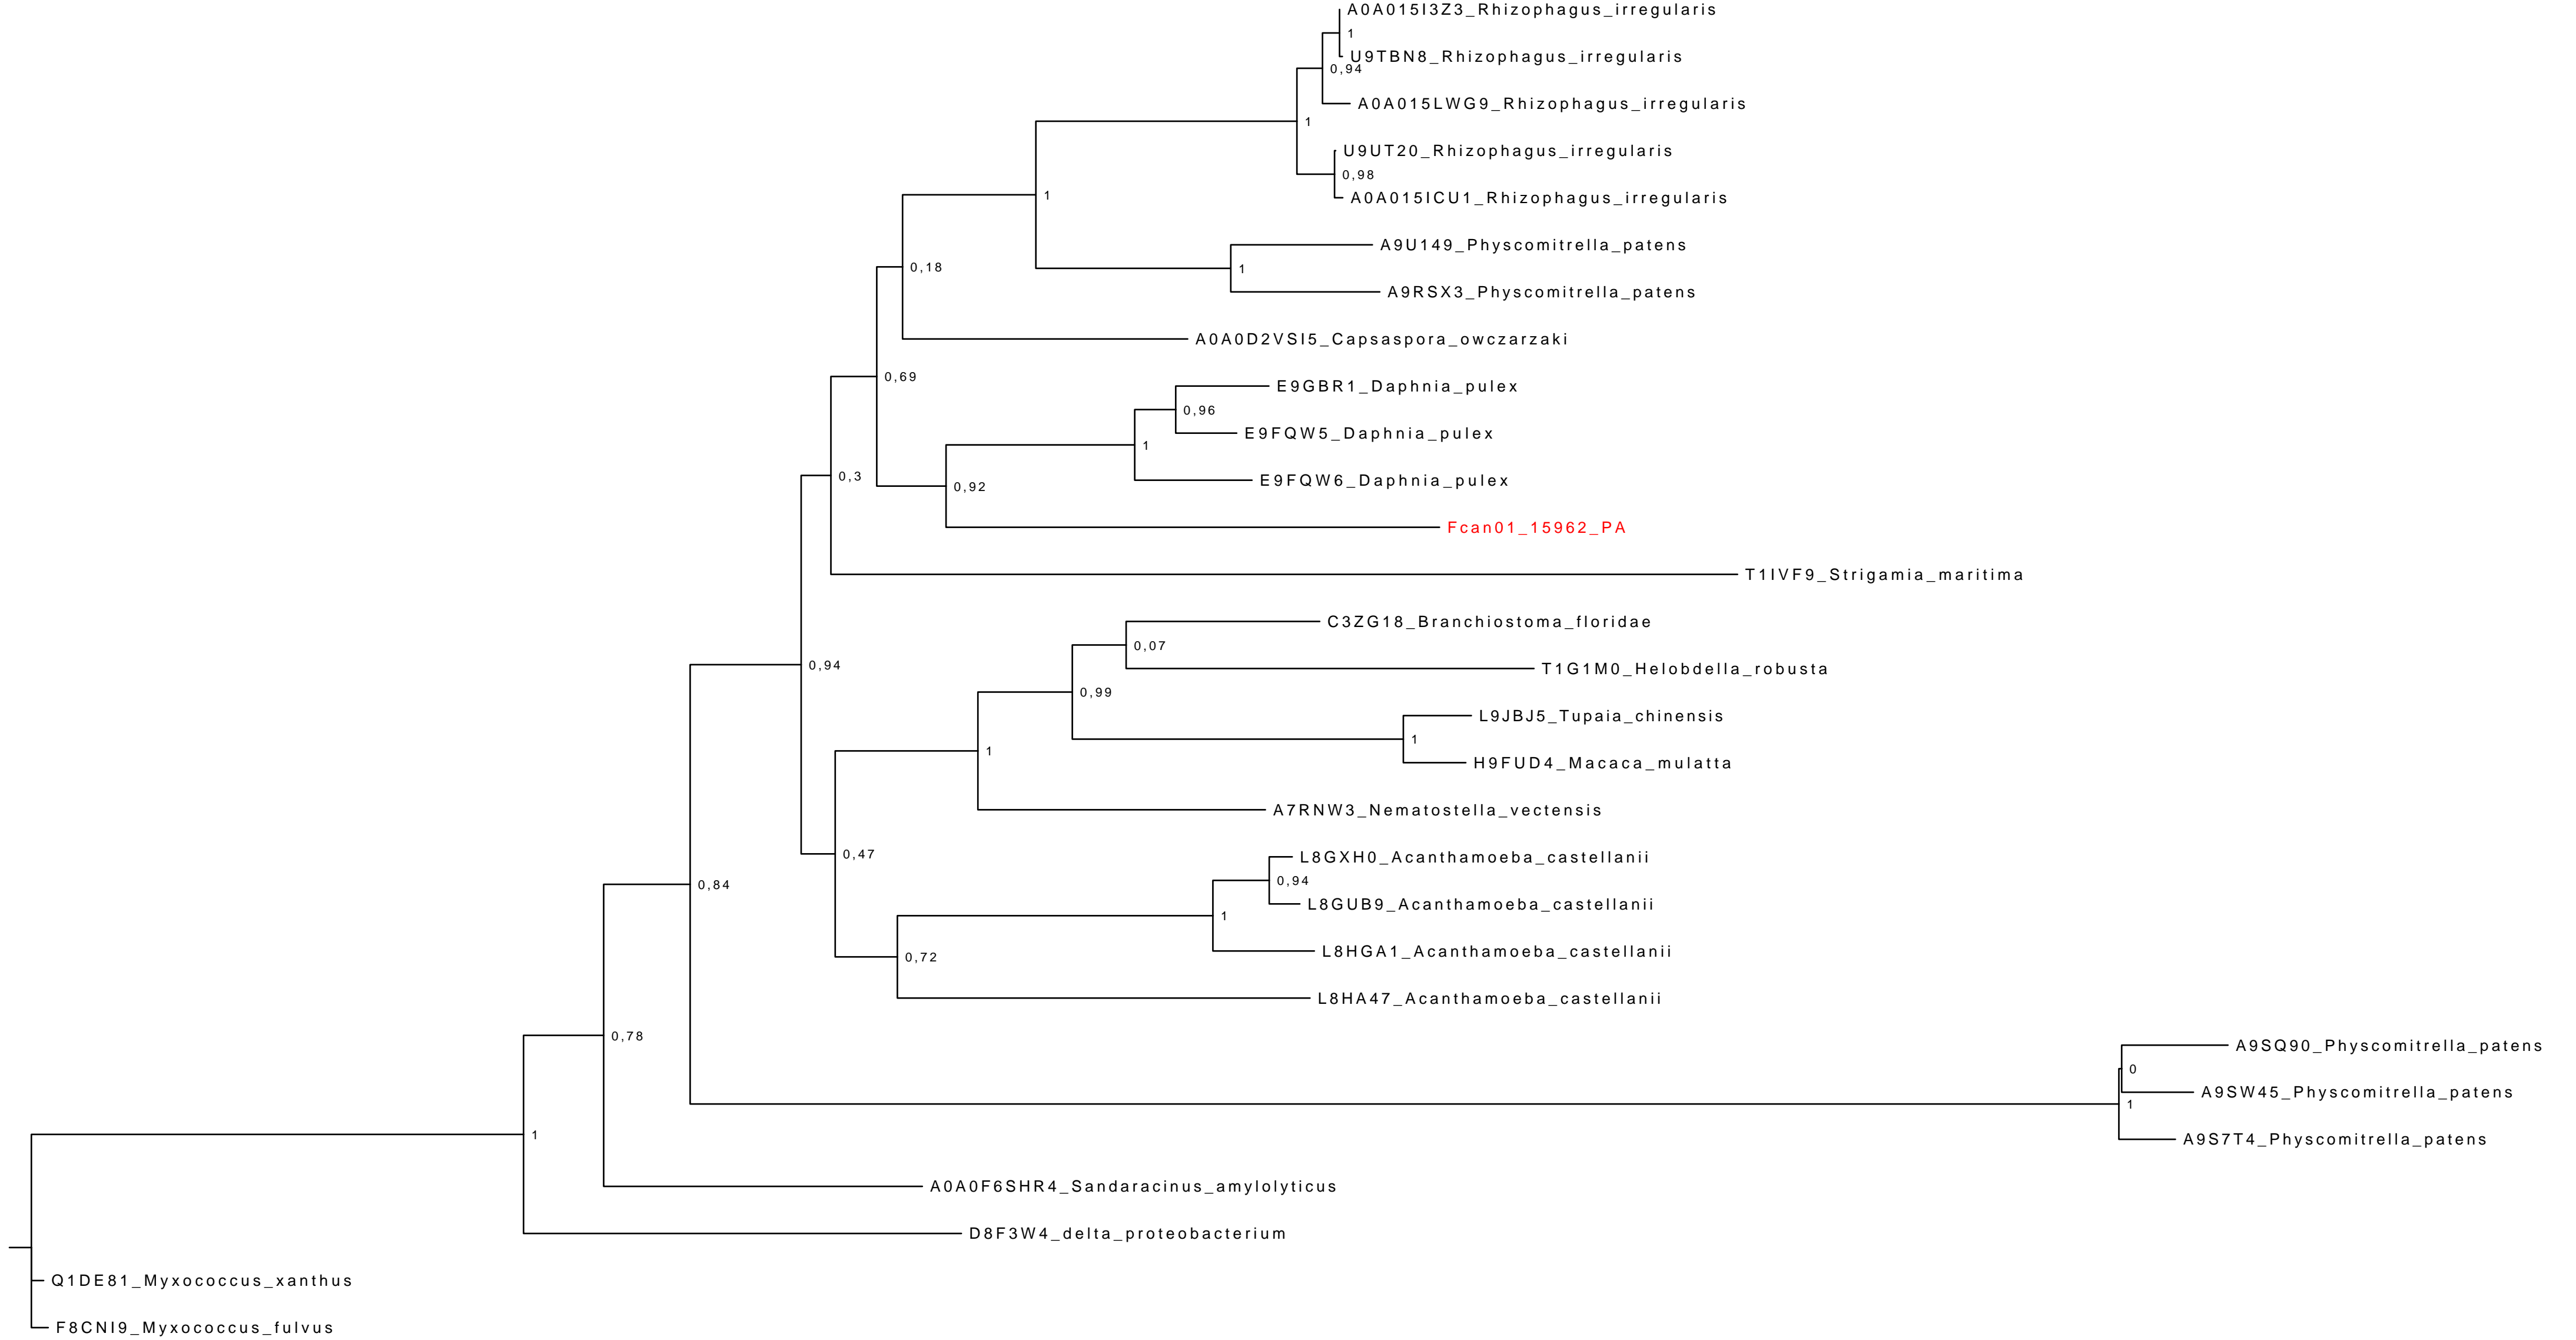

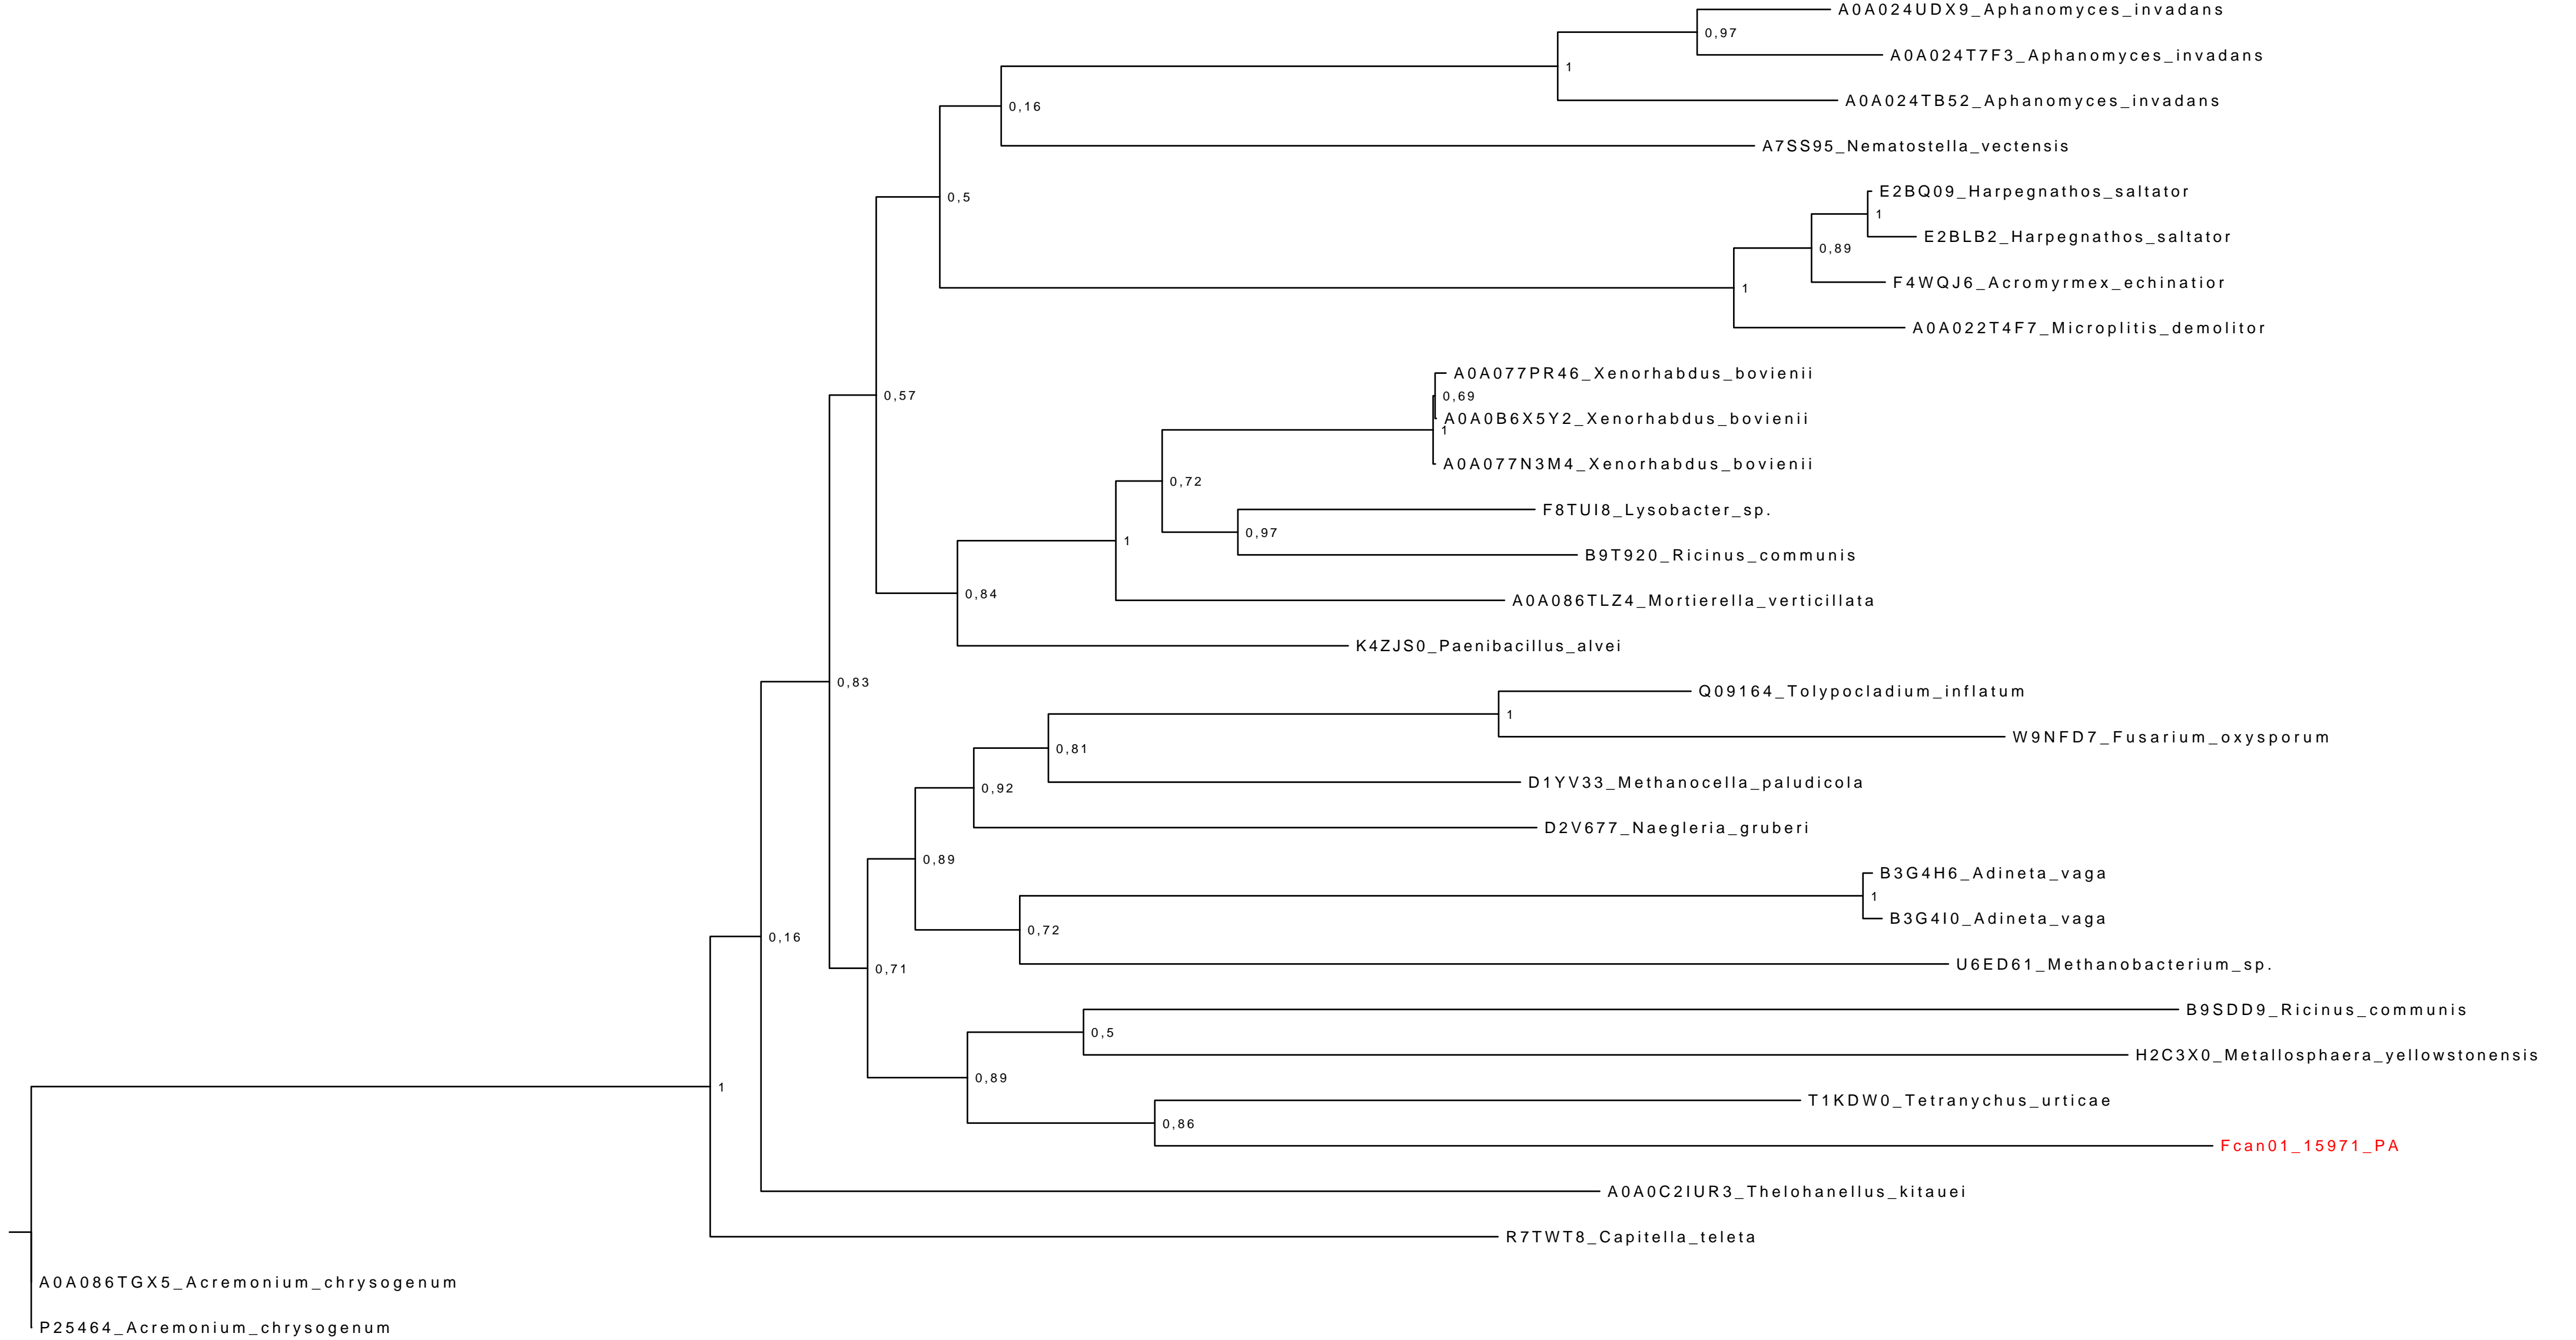

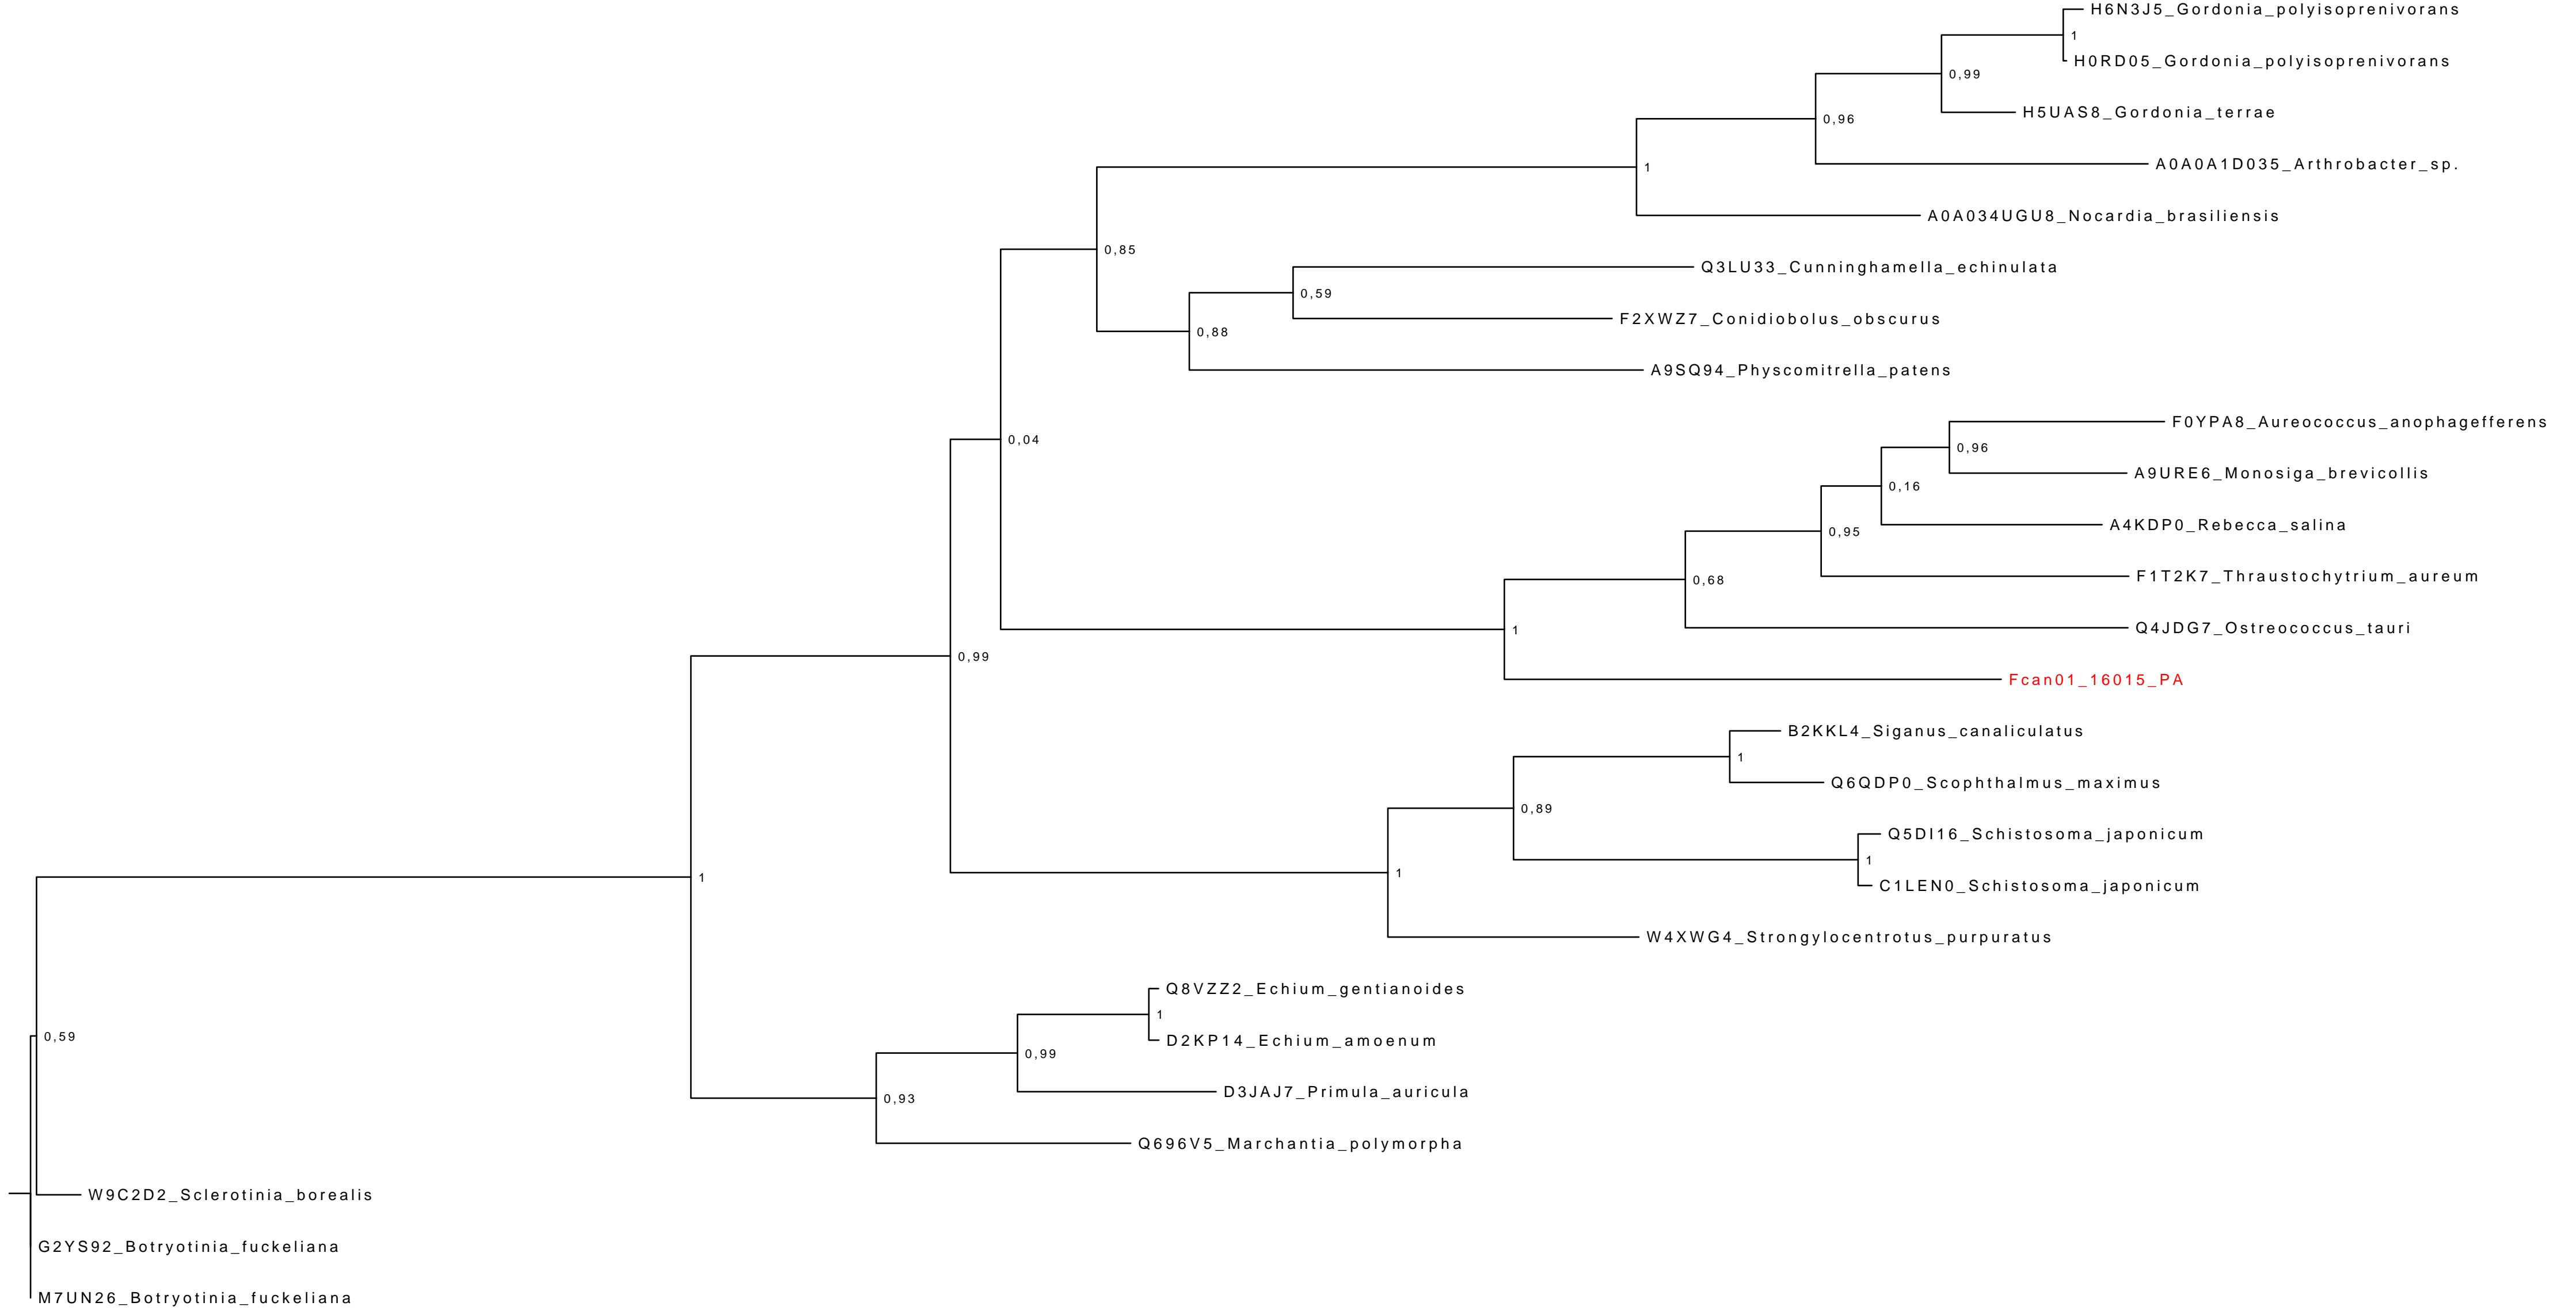



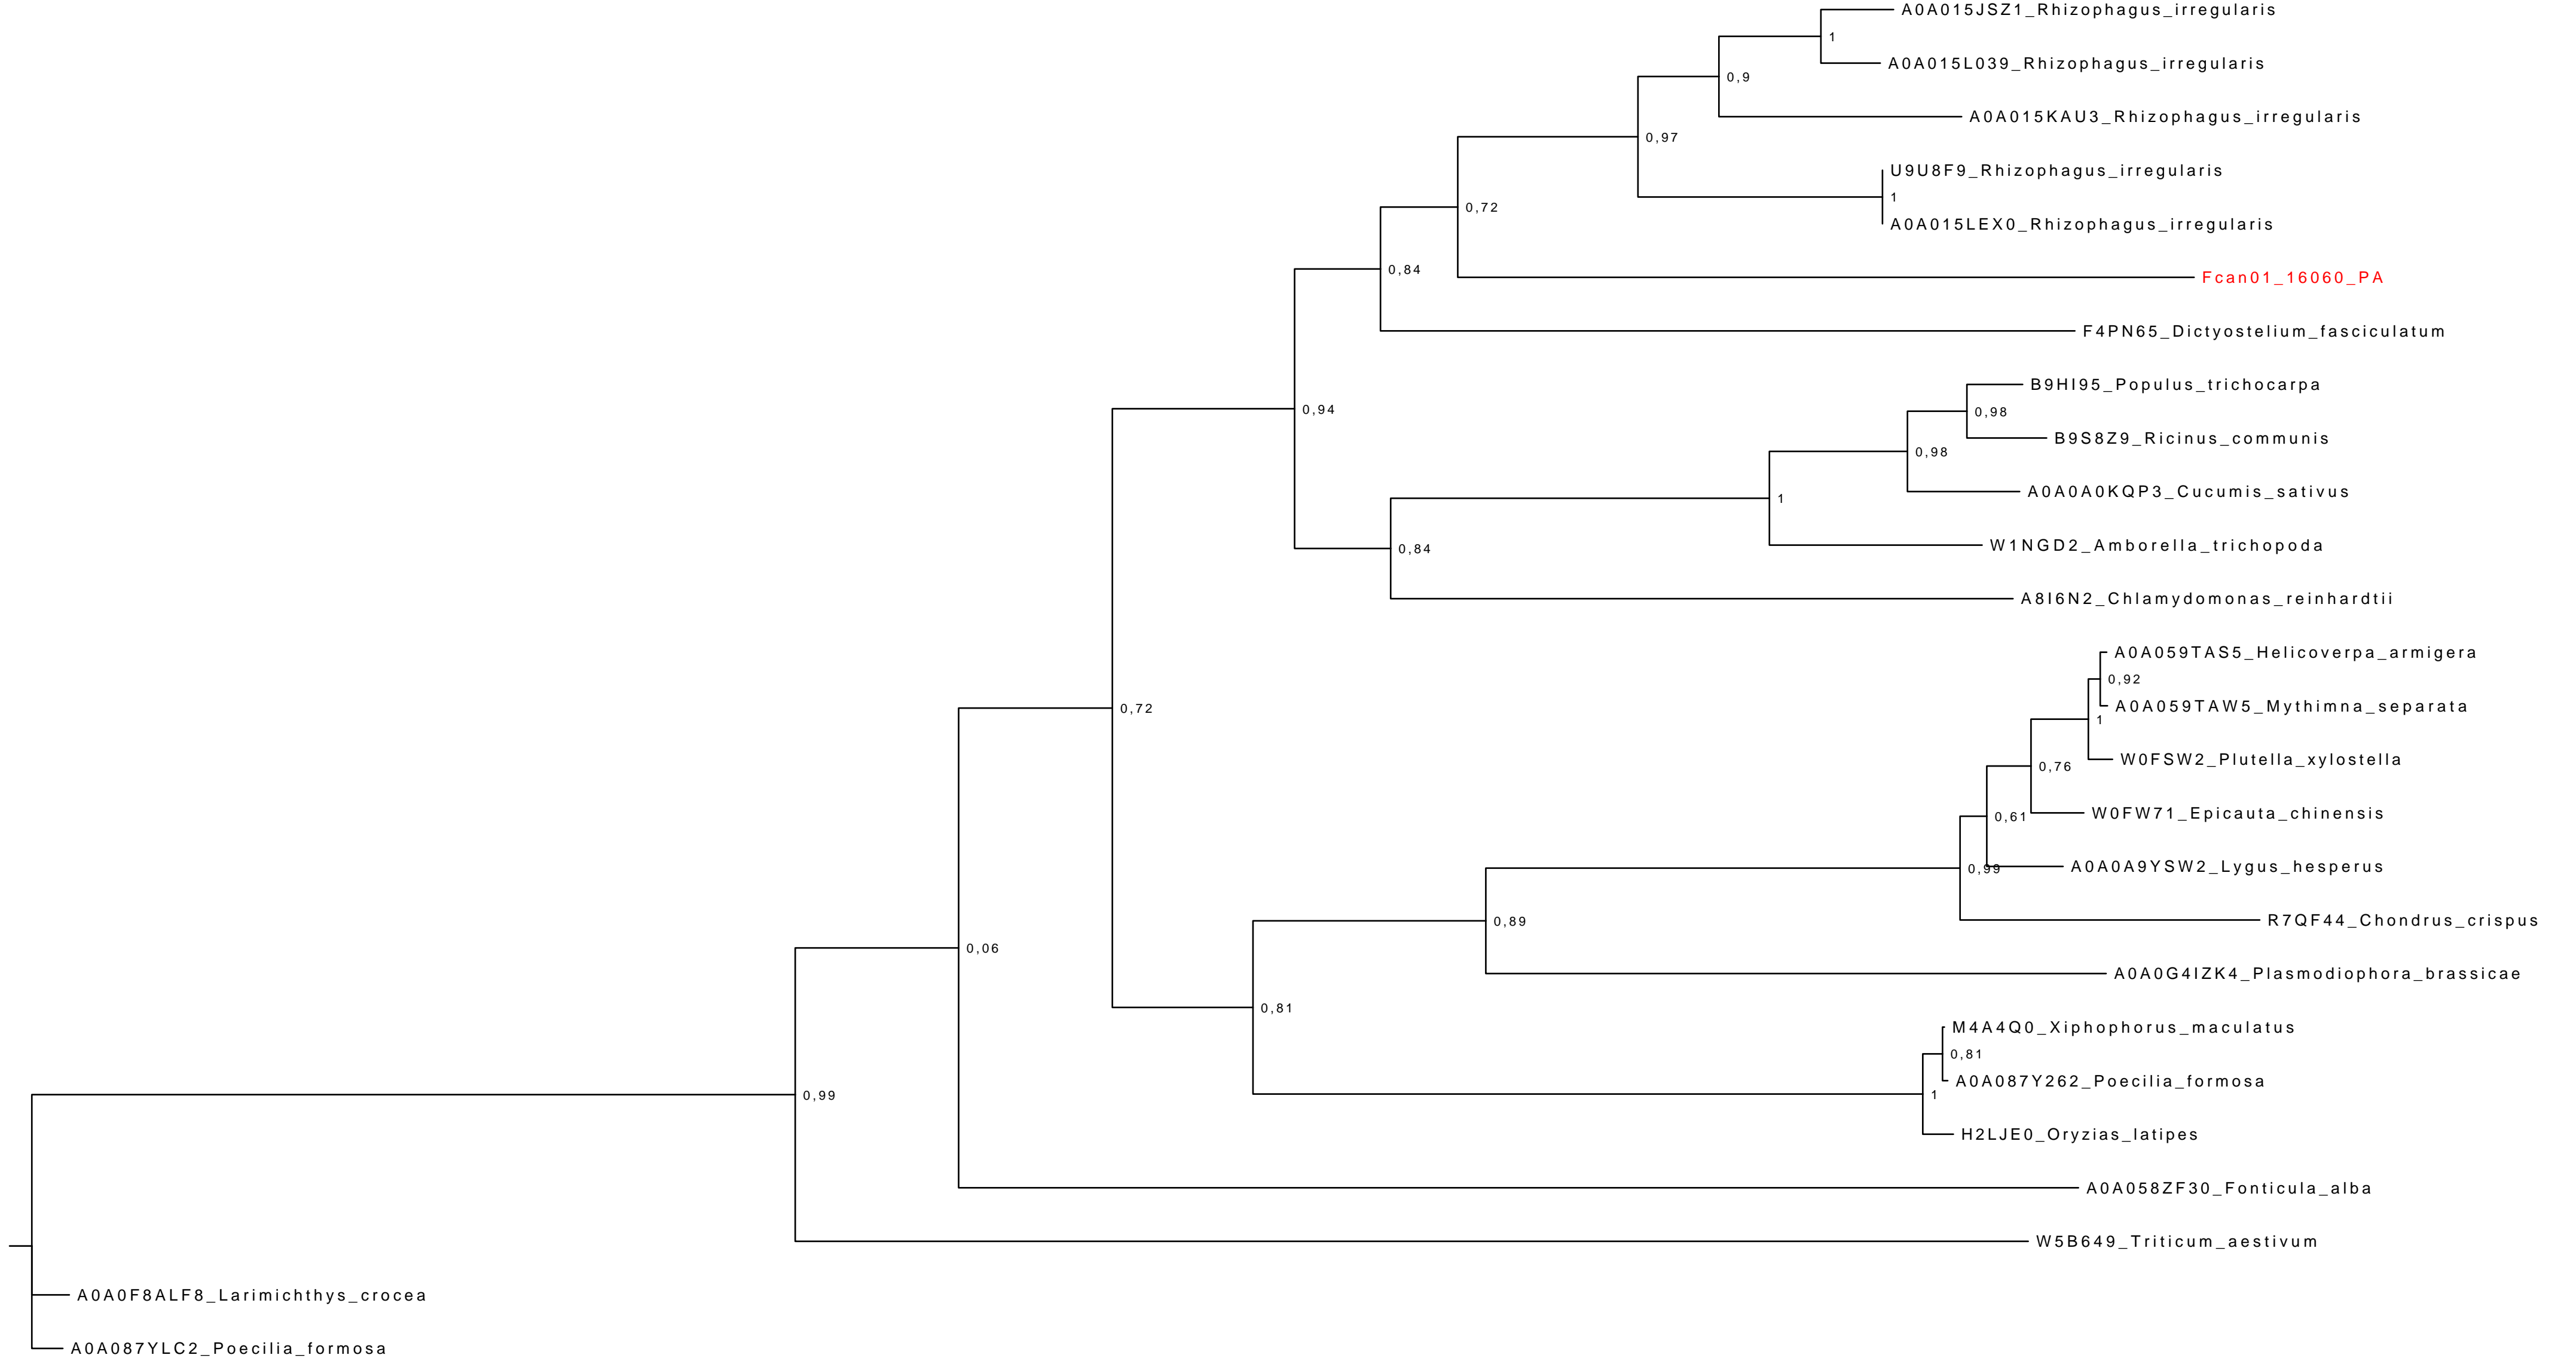

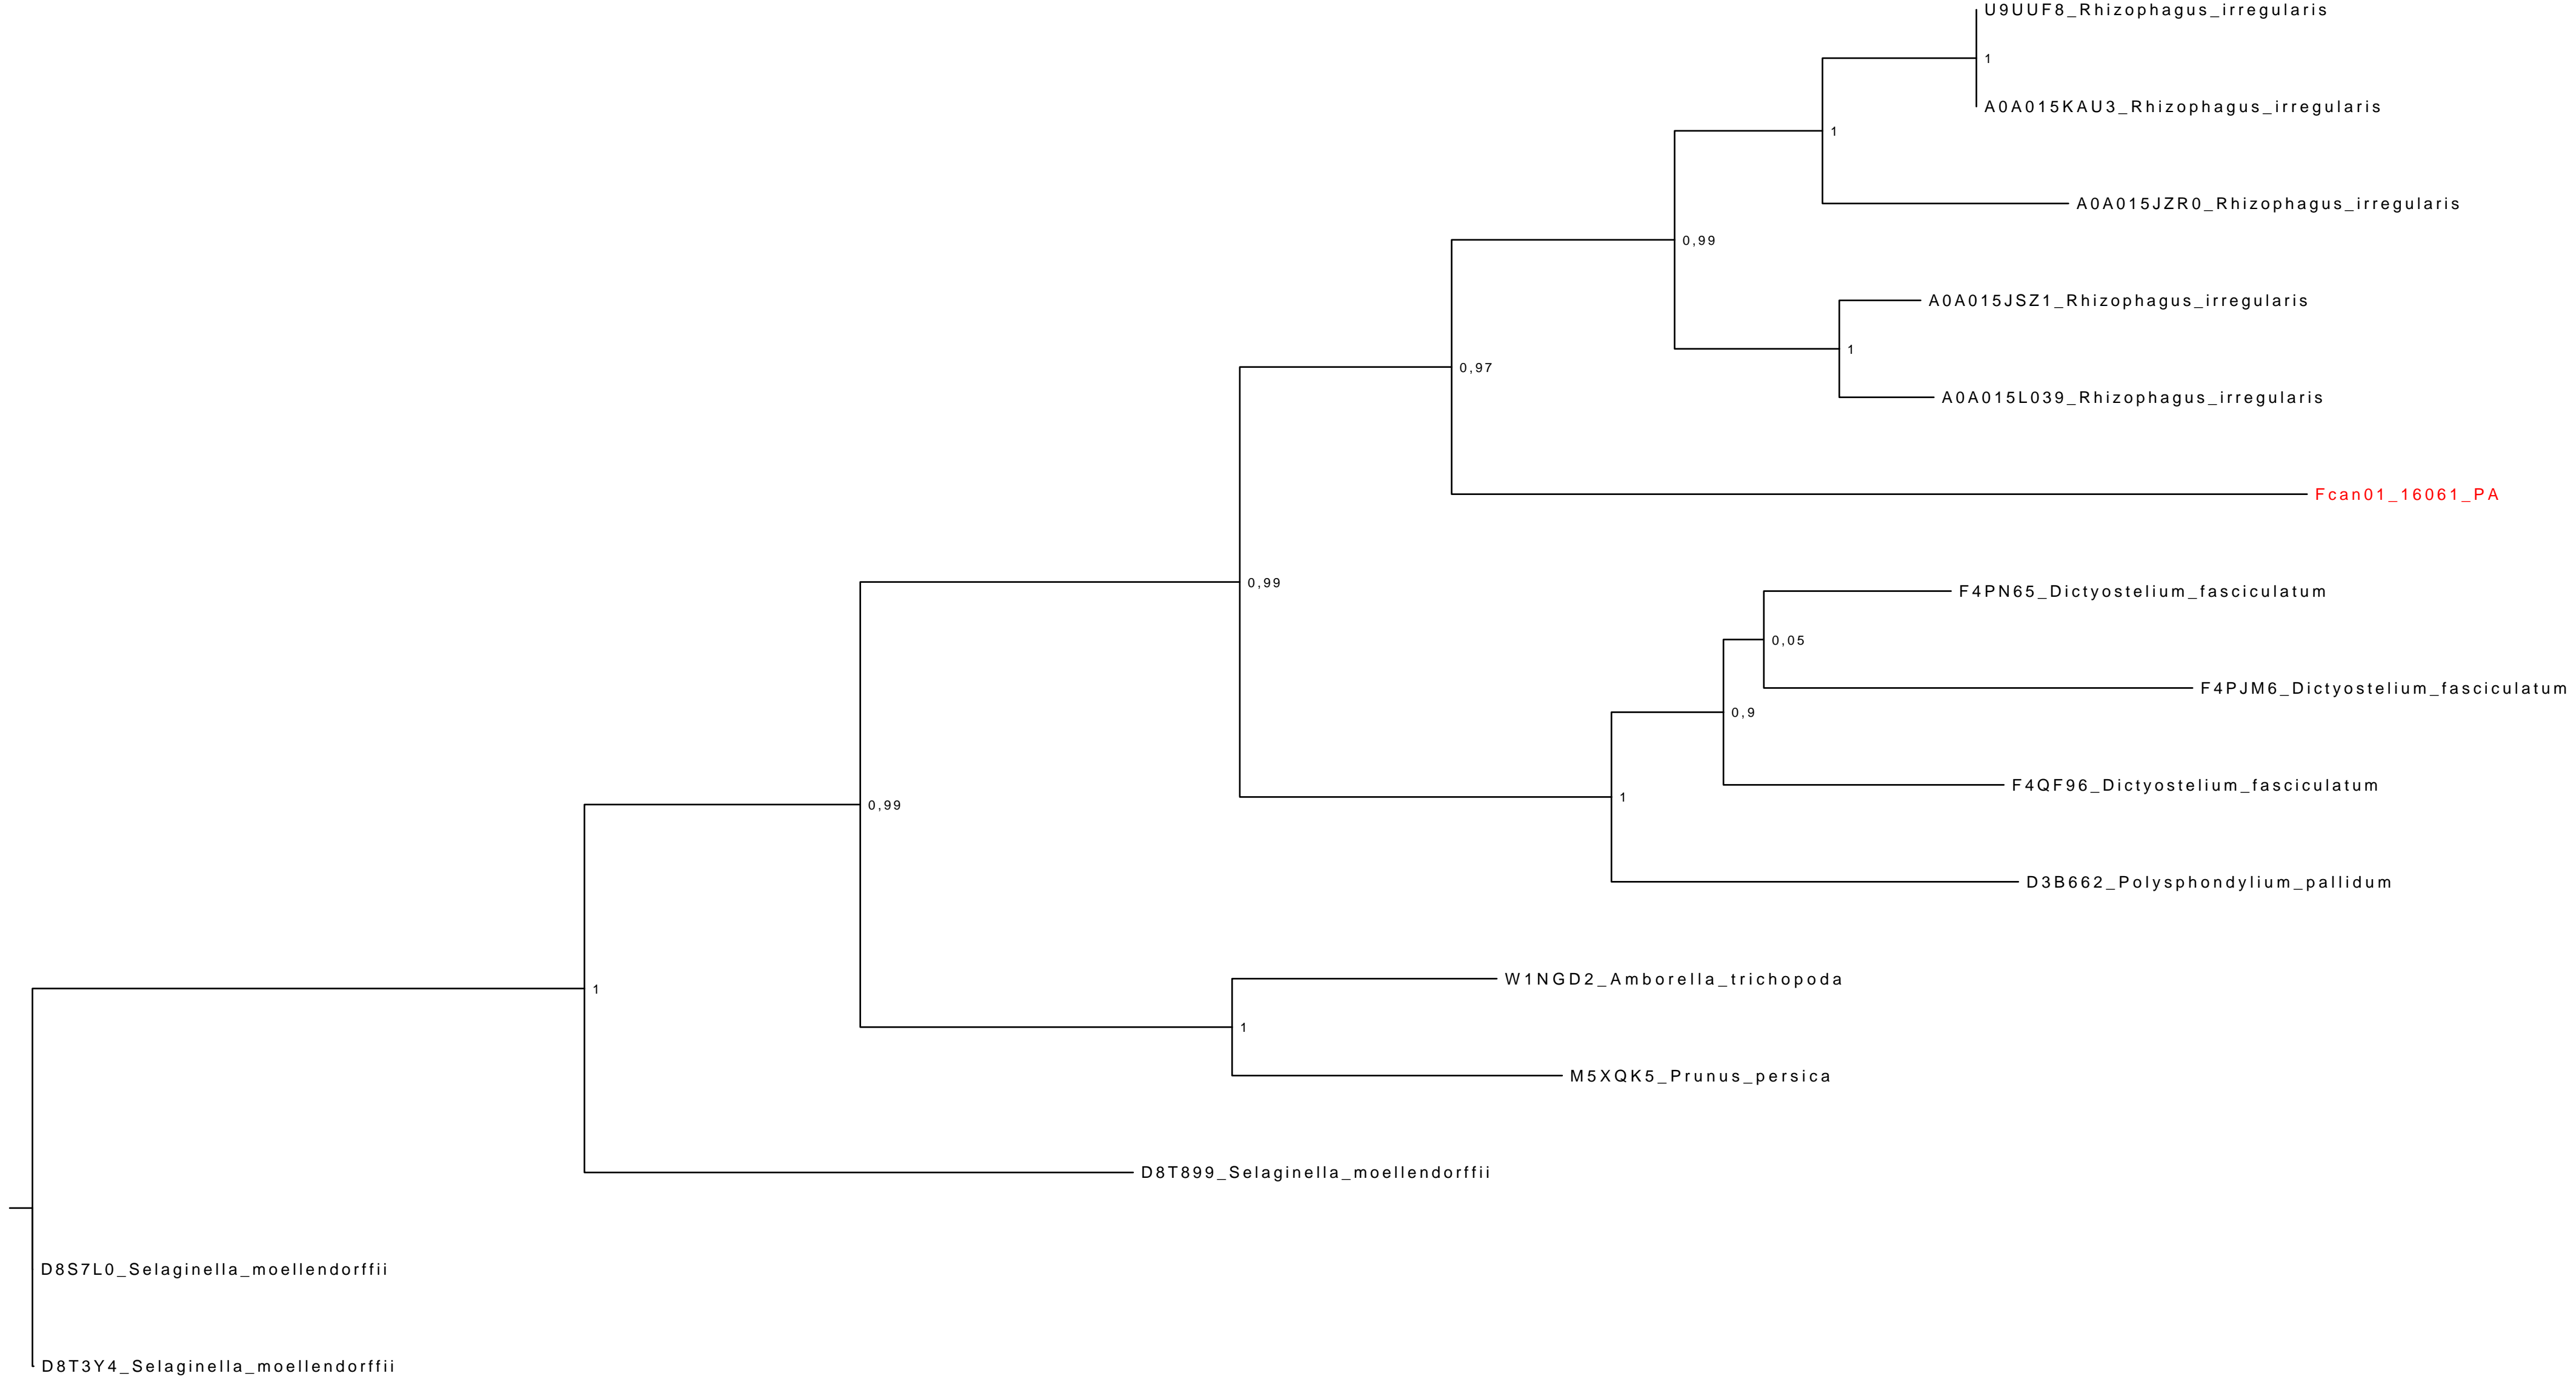

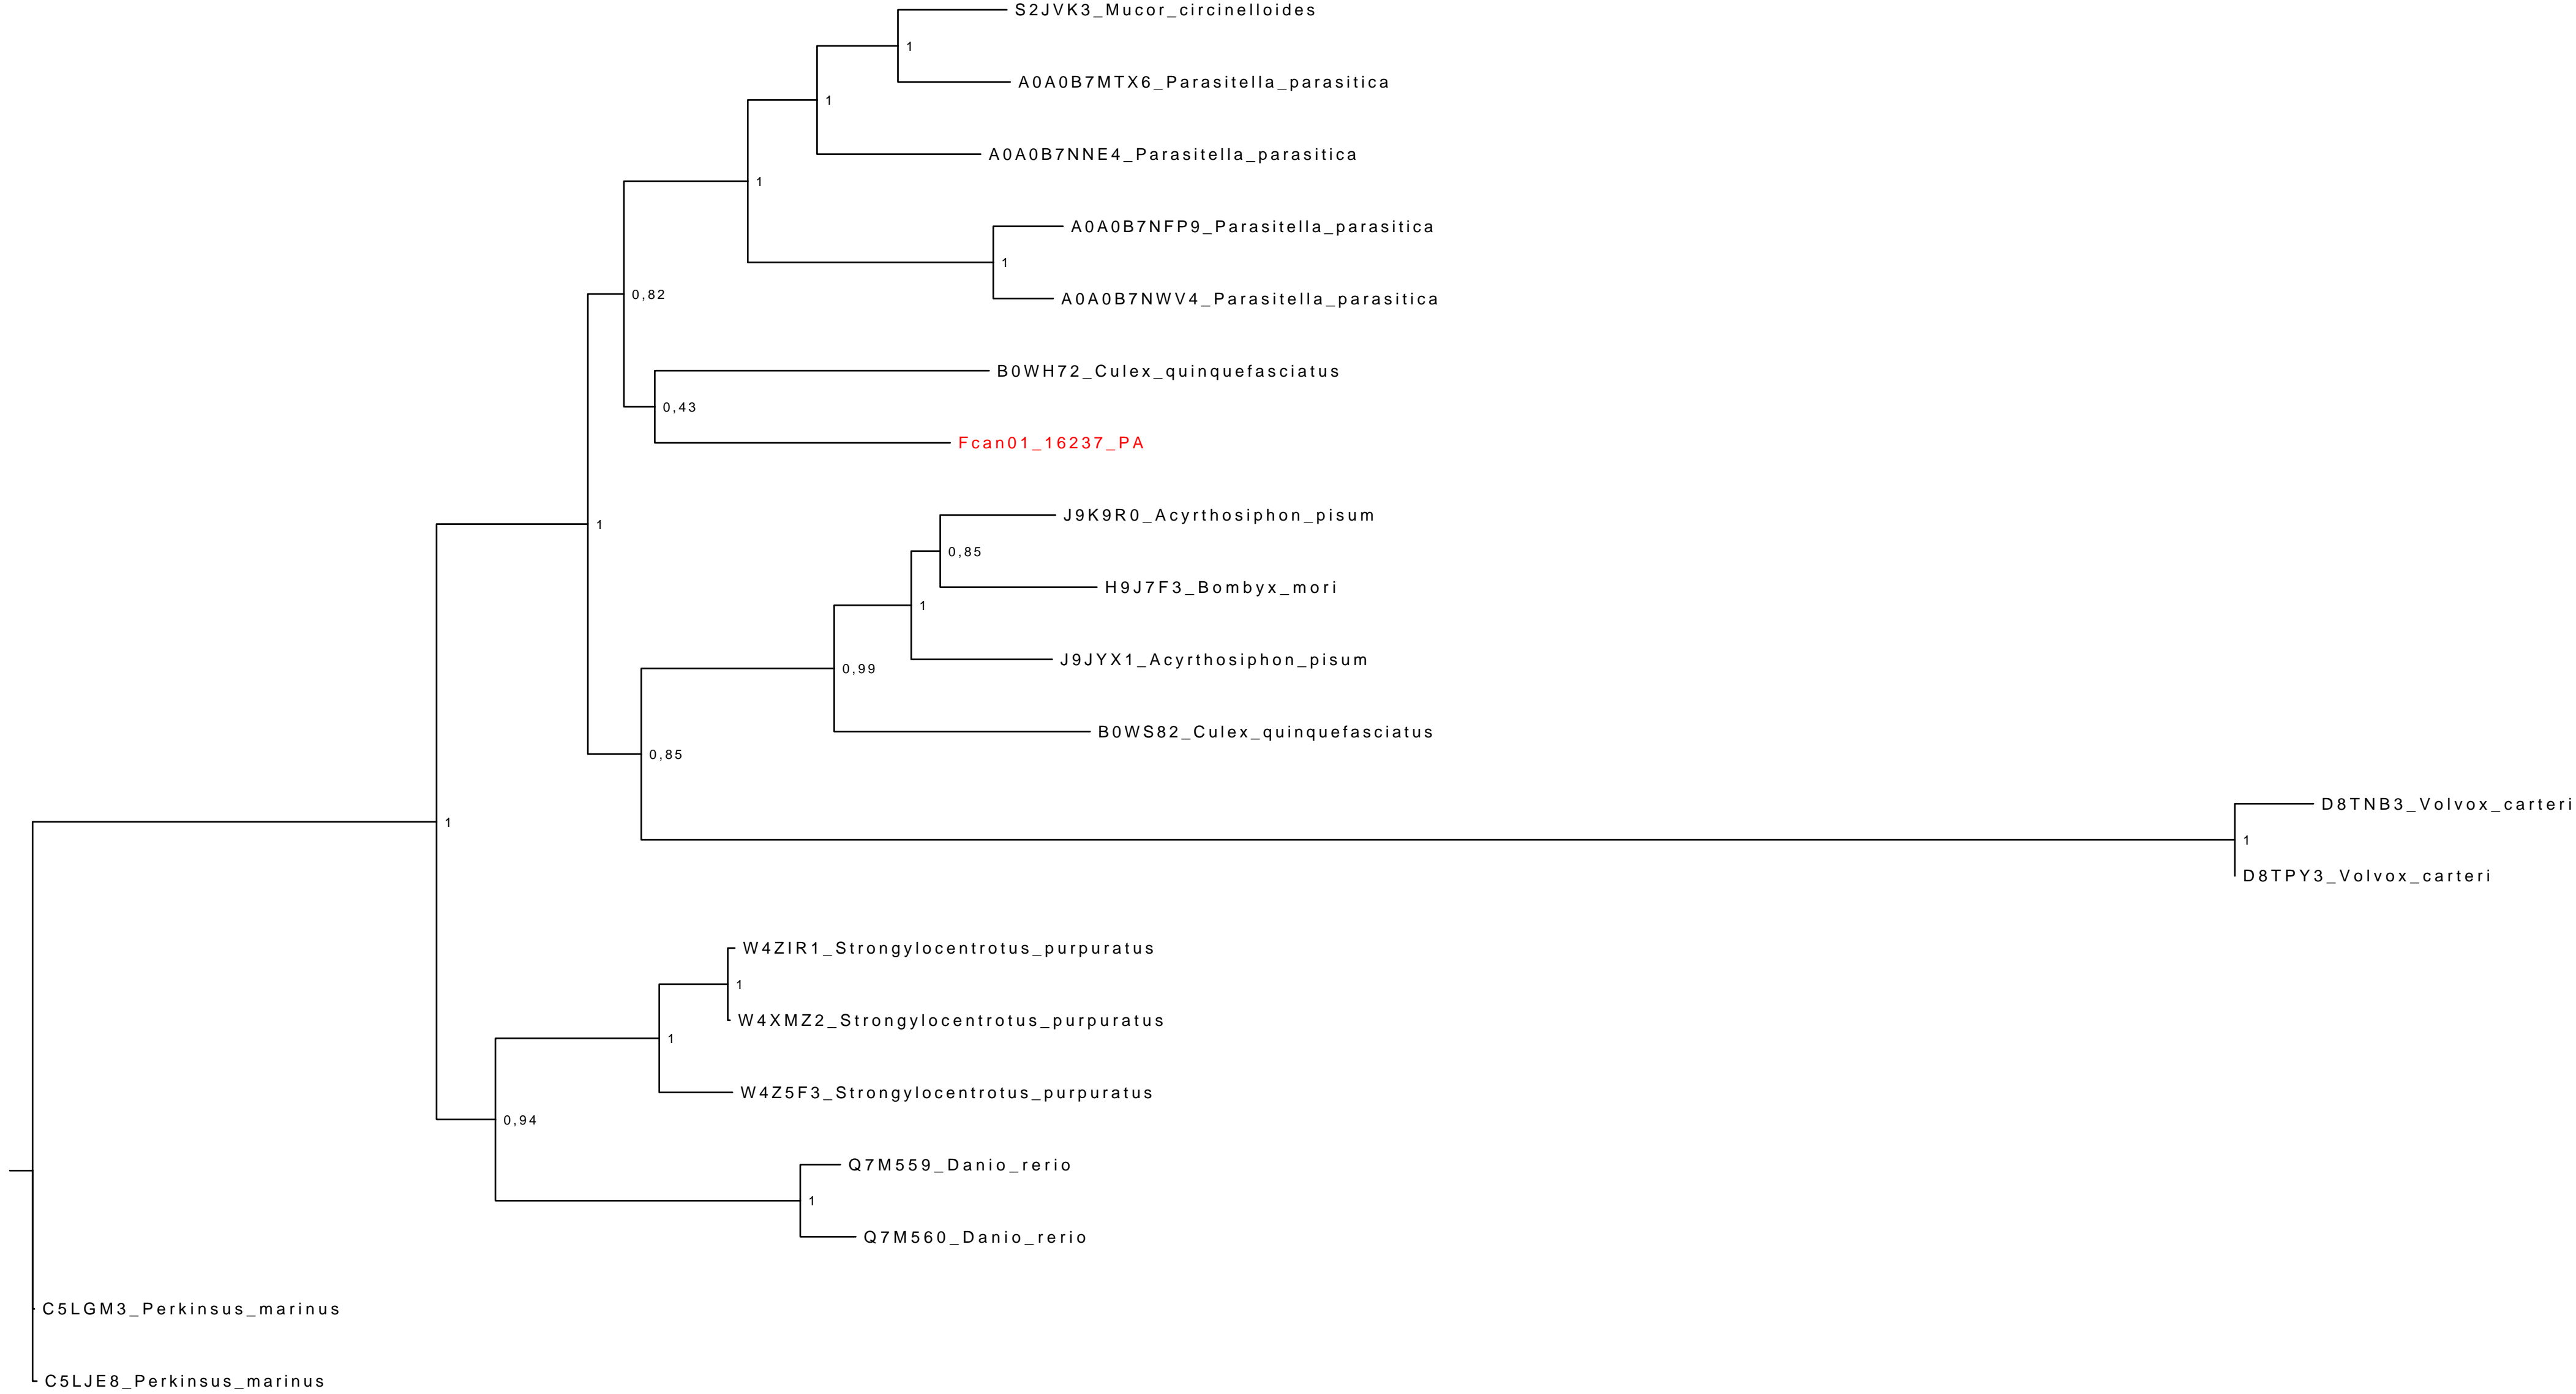

0.9

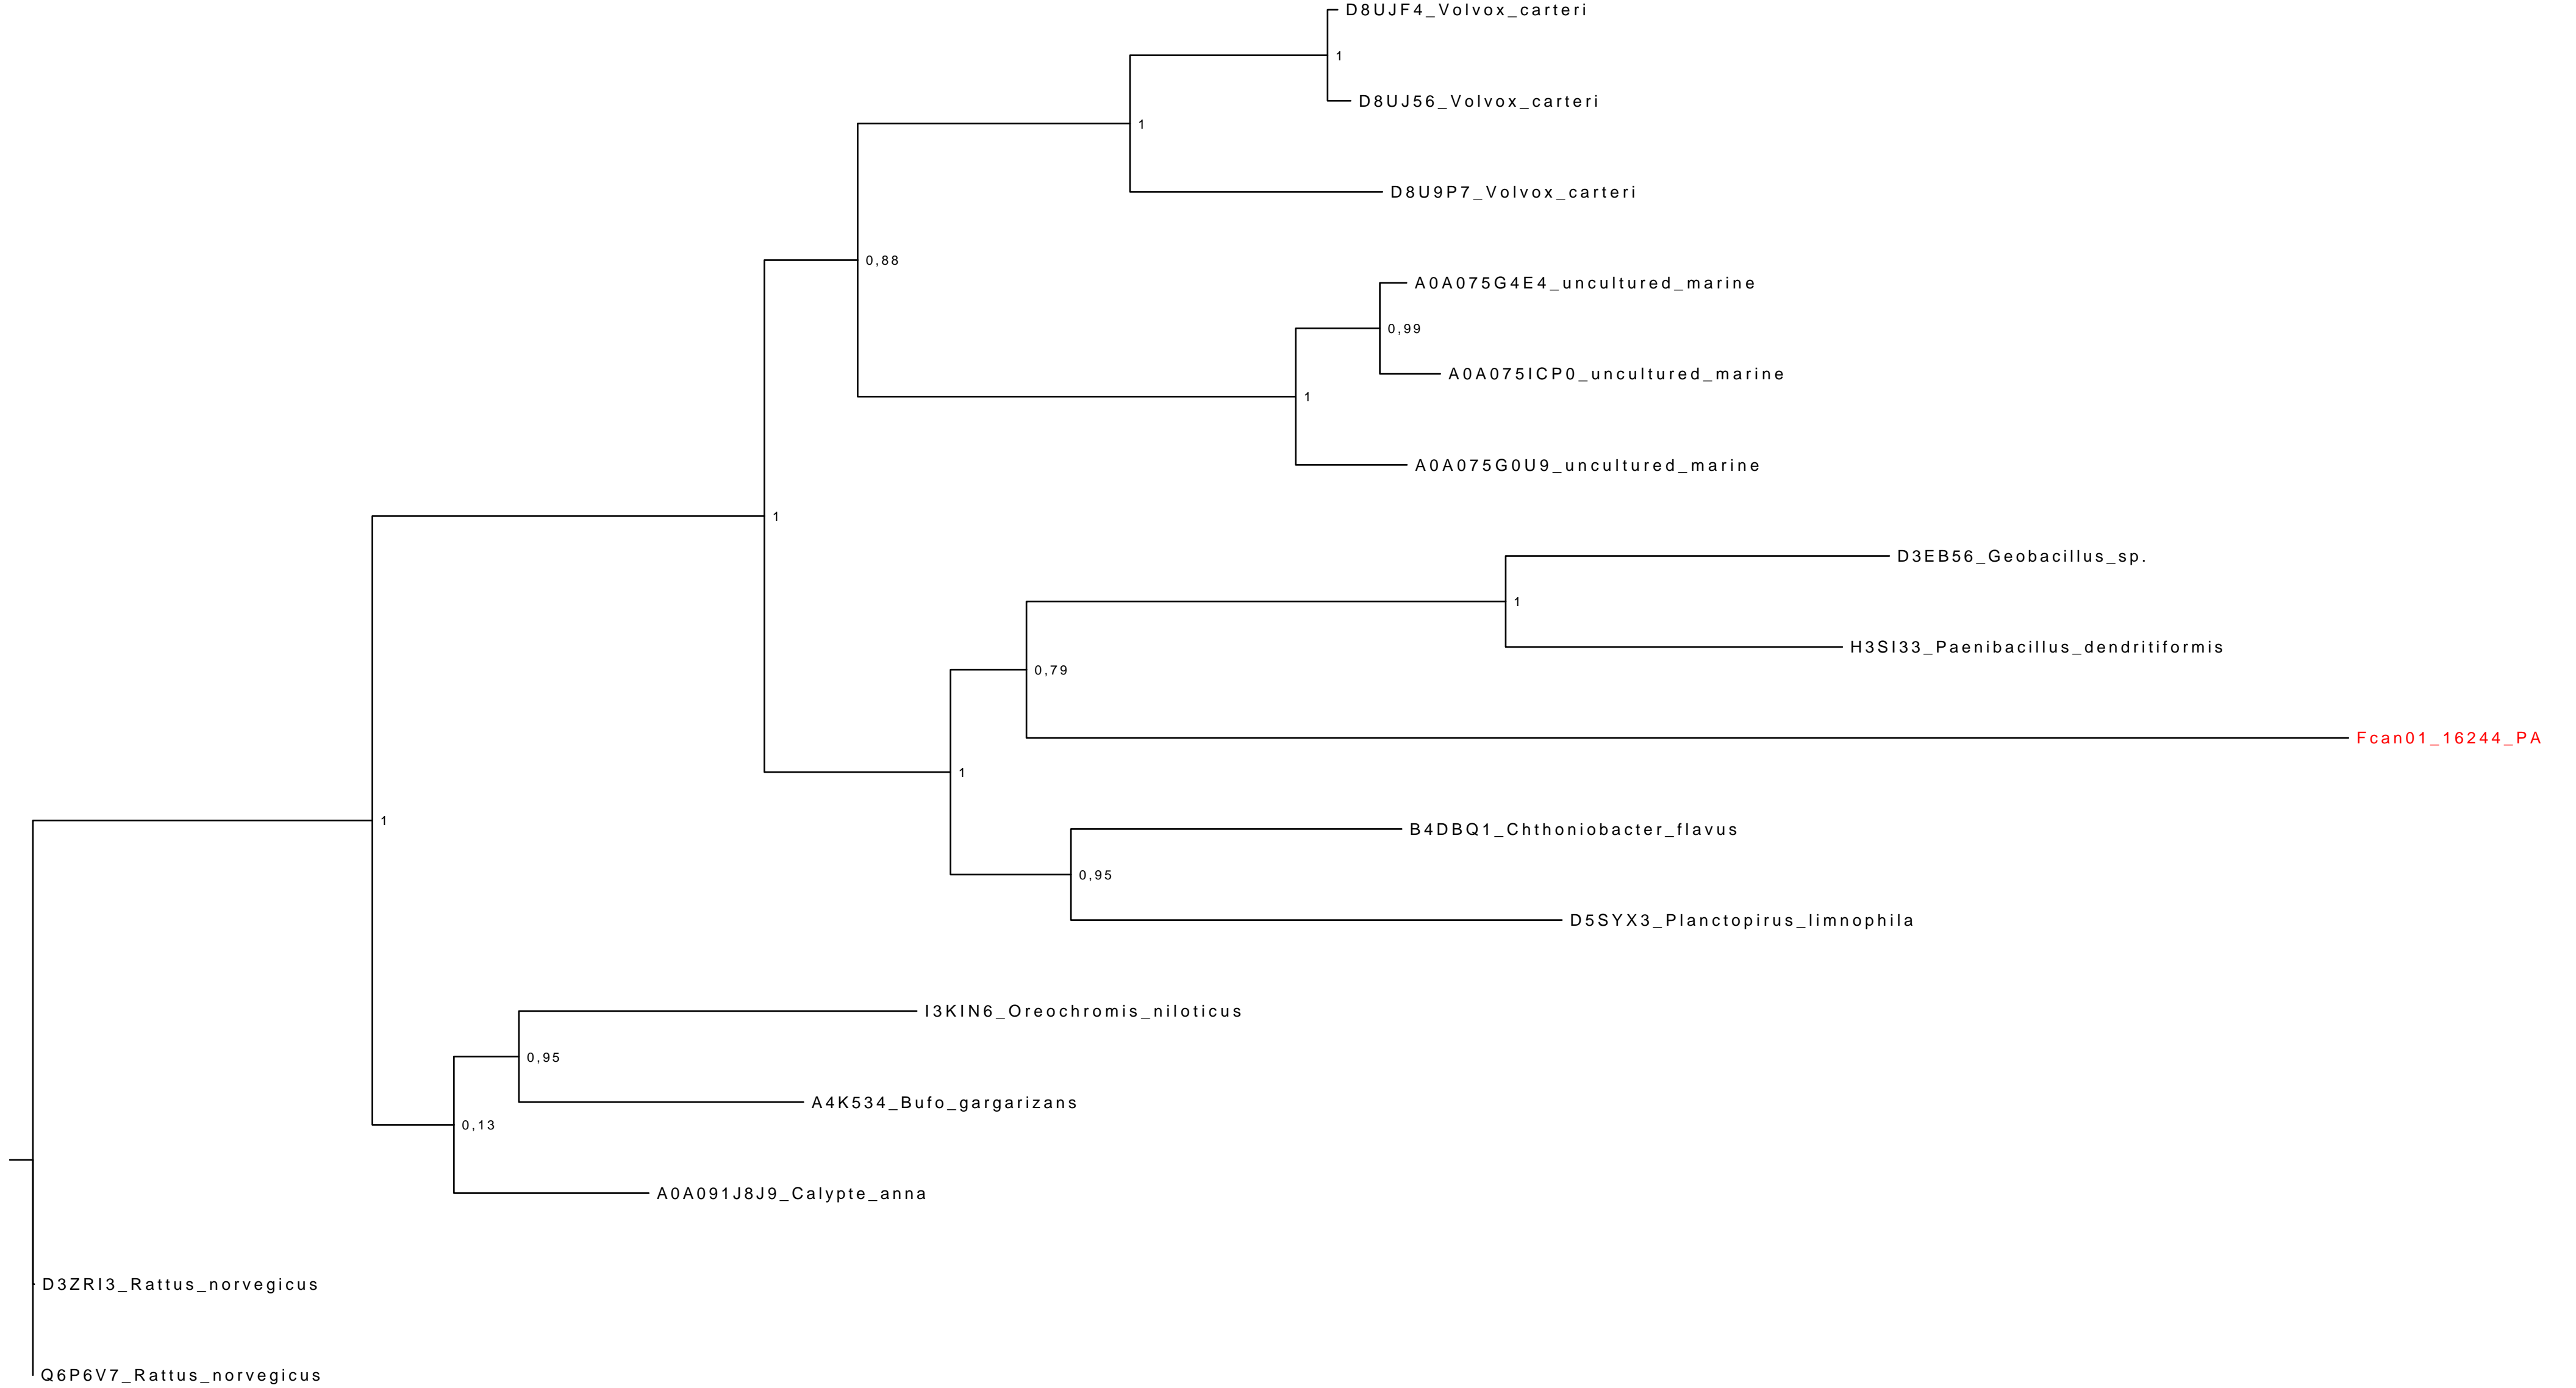

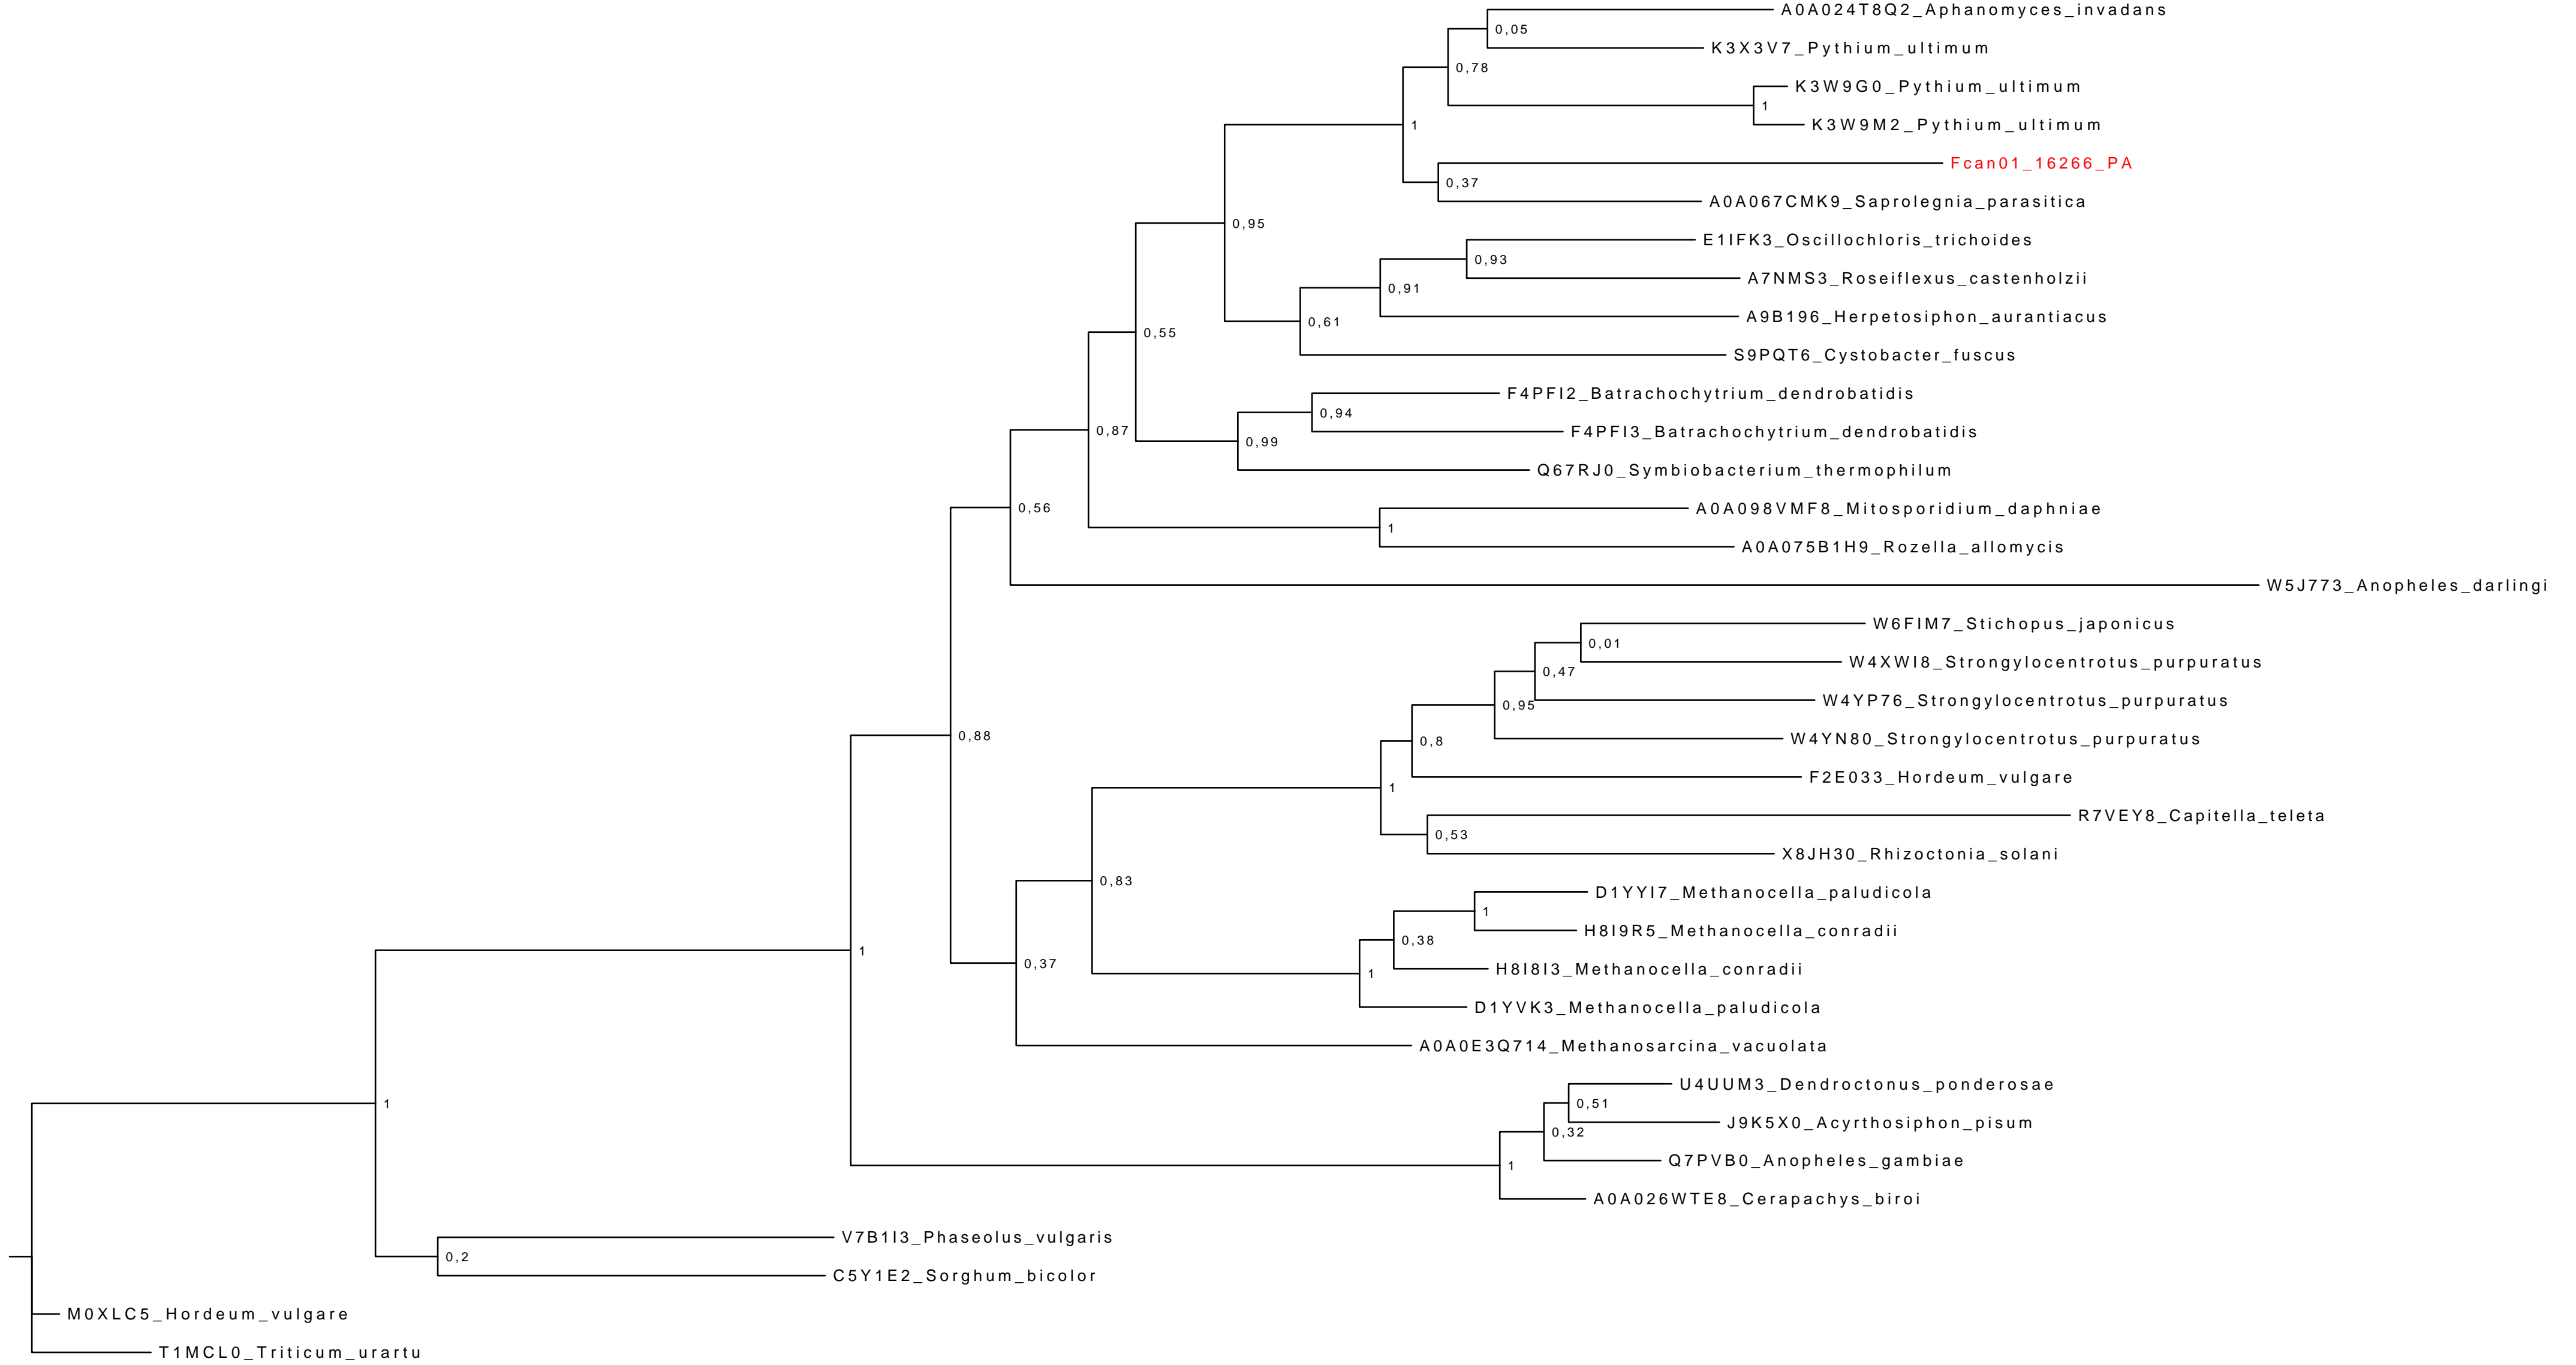

0.5

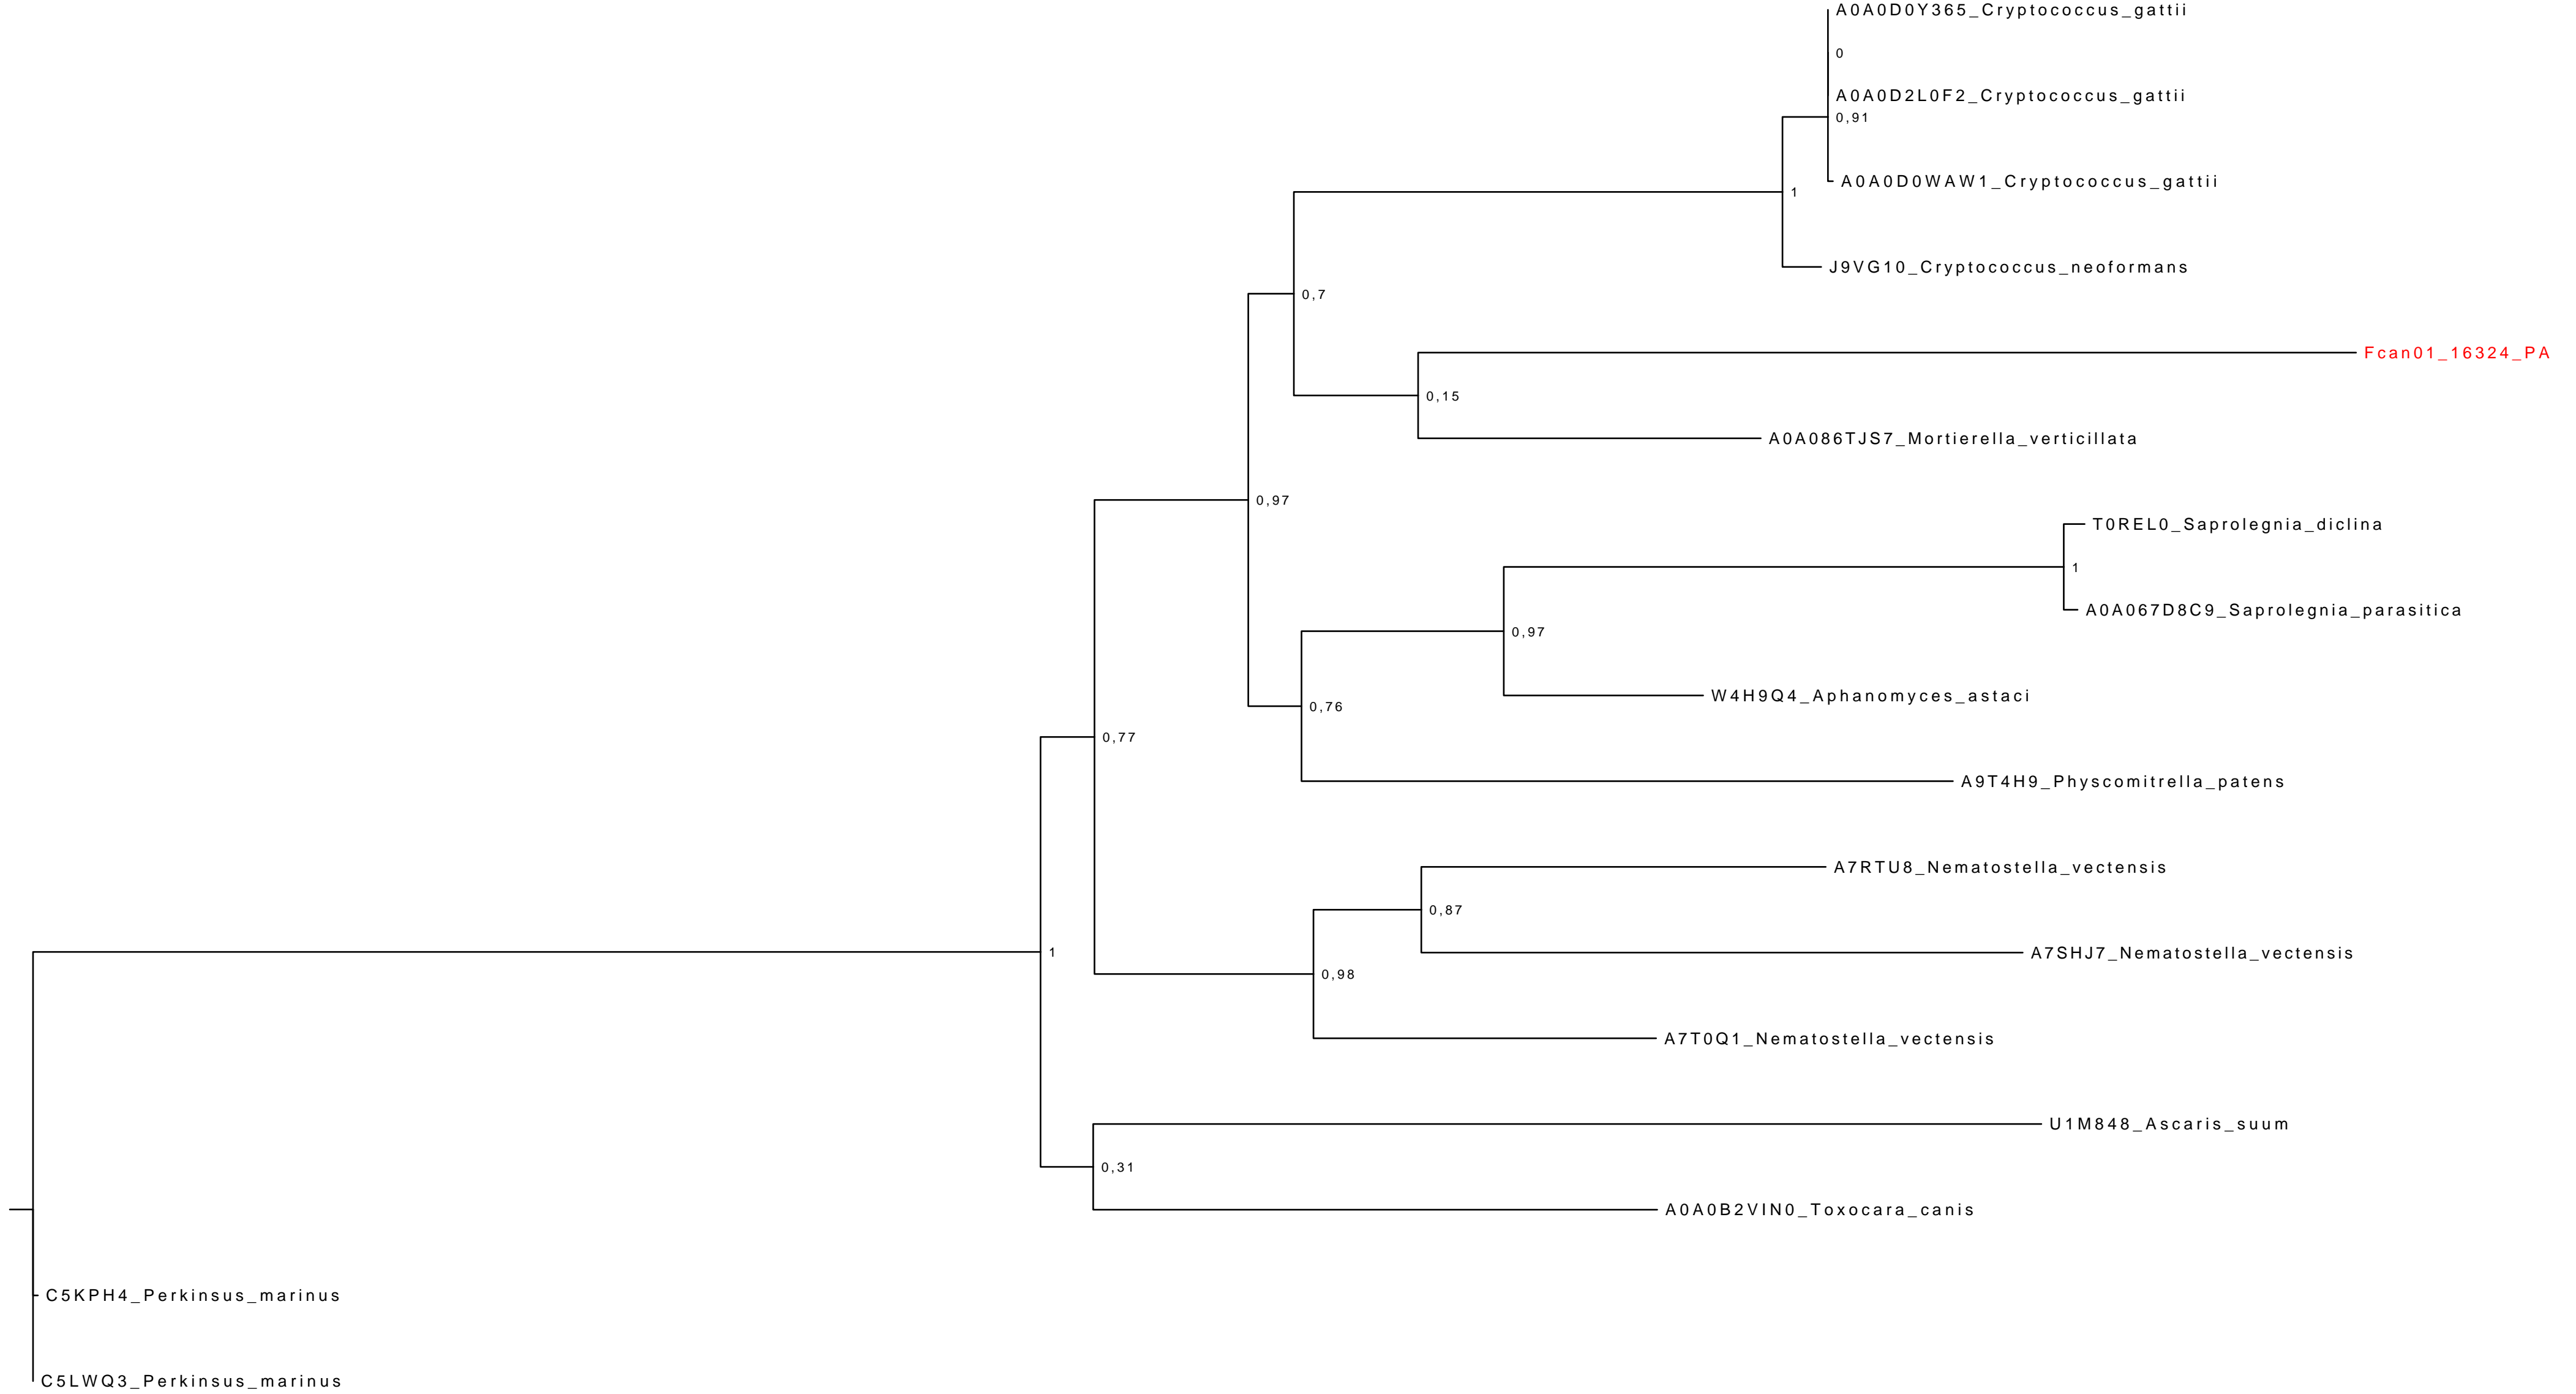

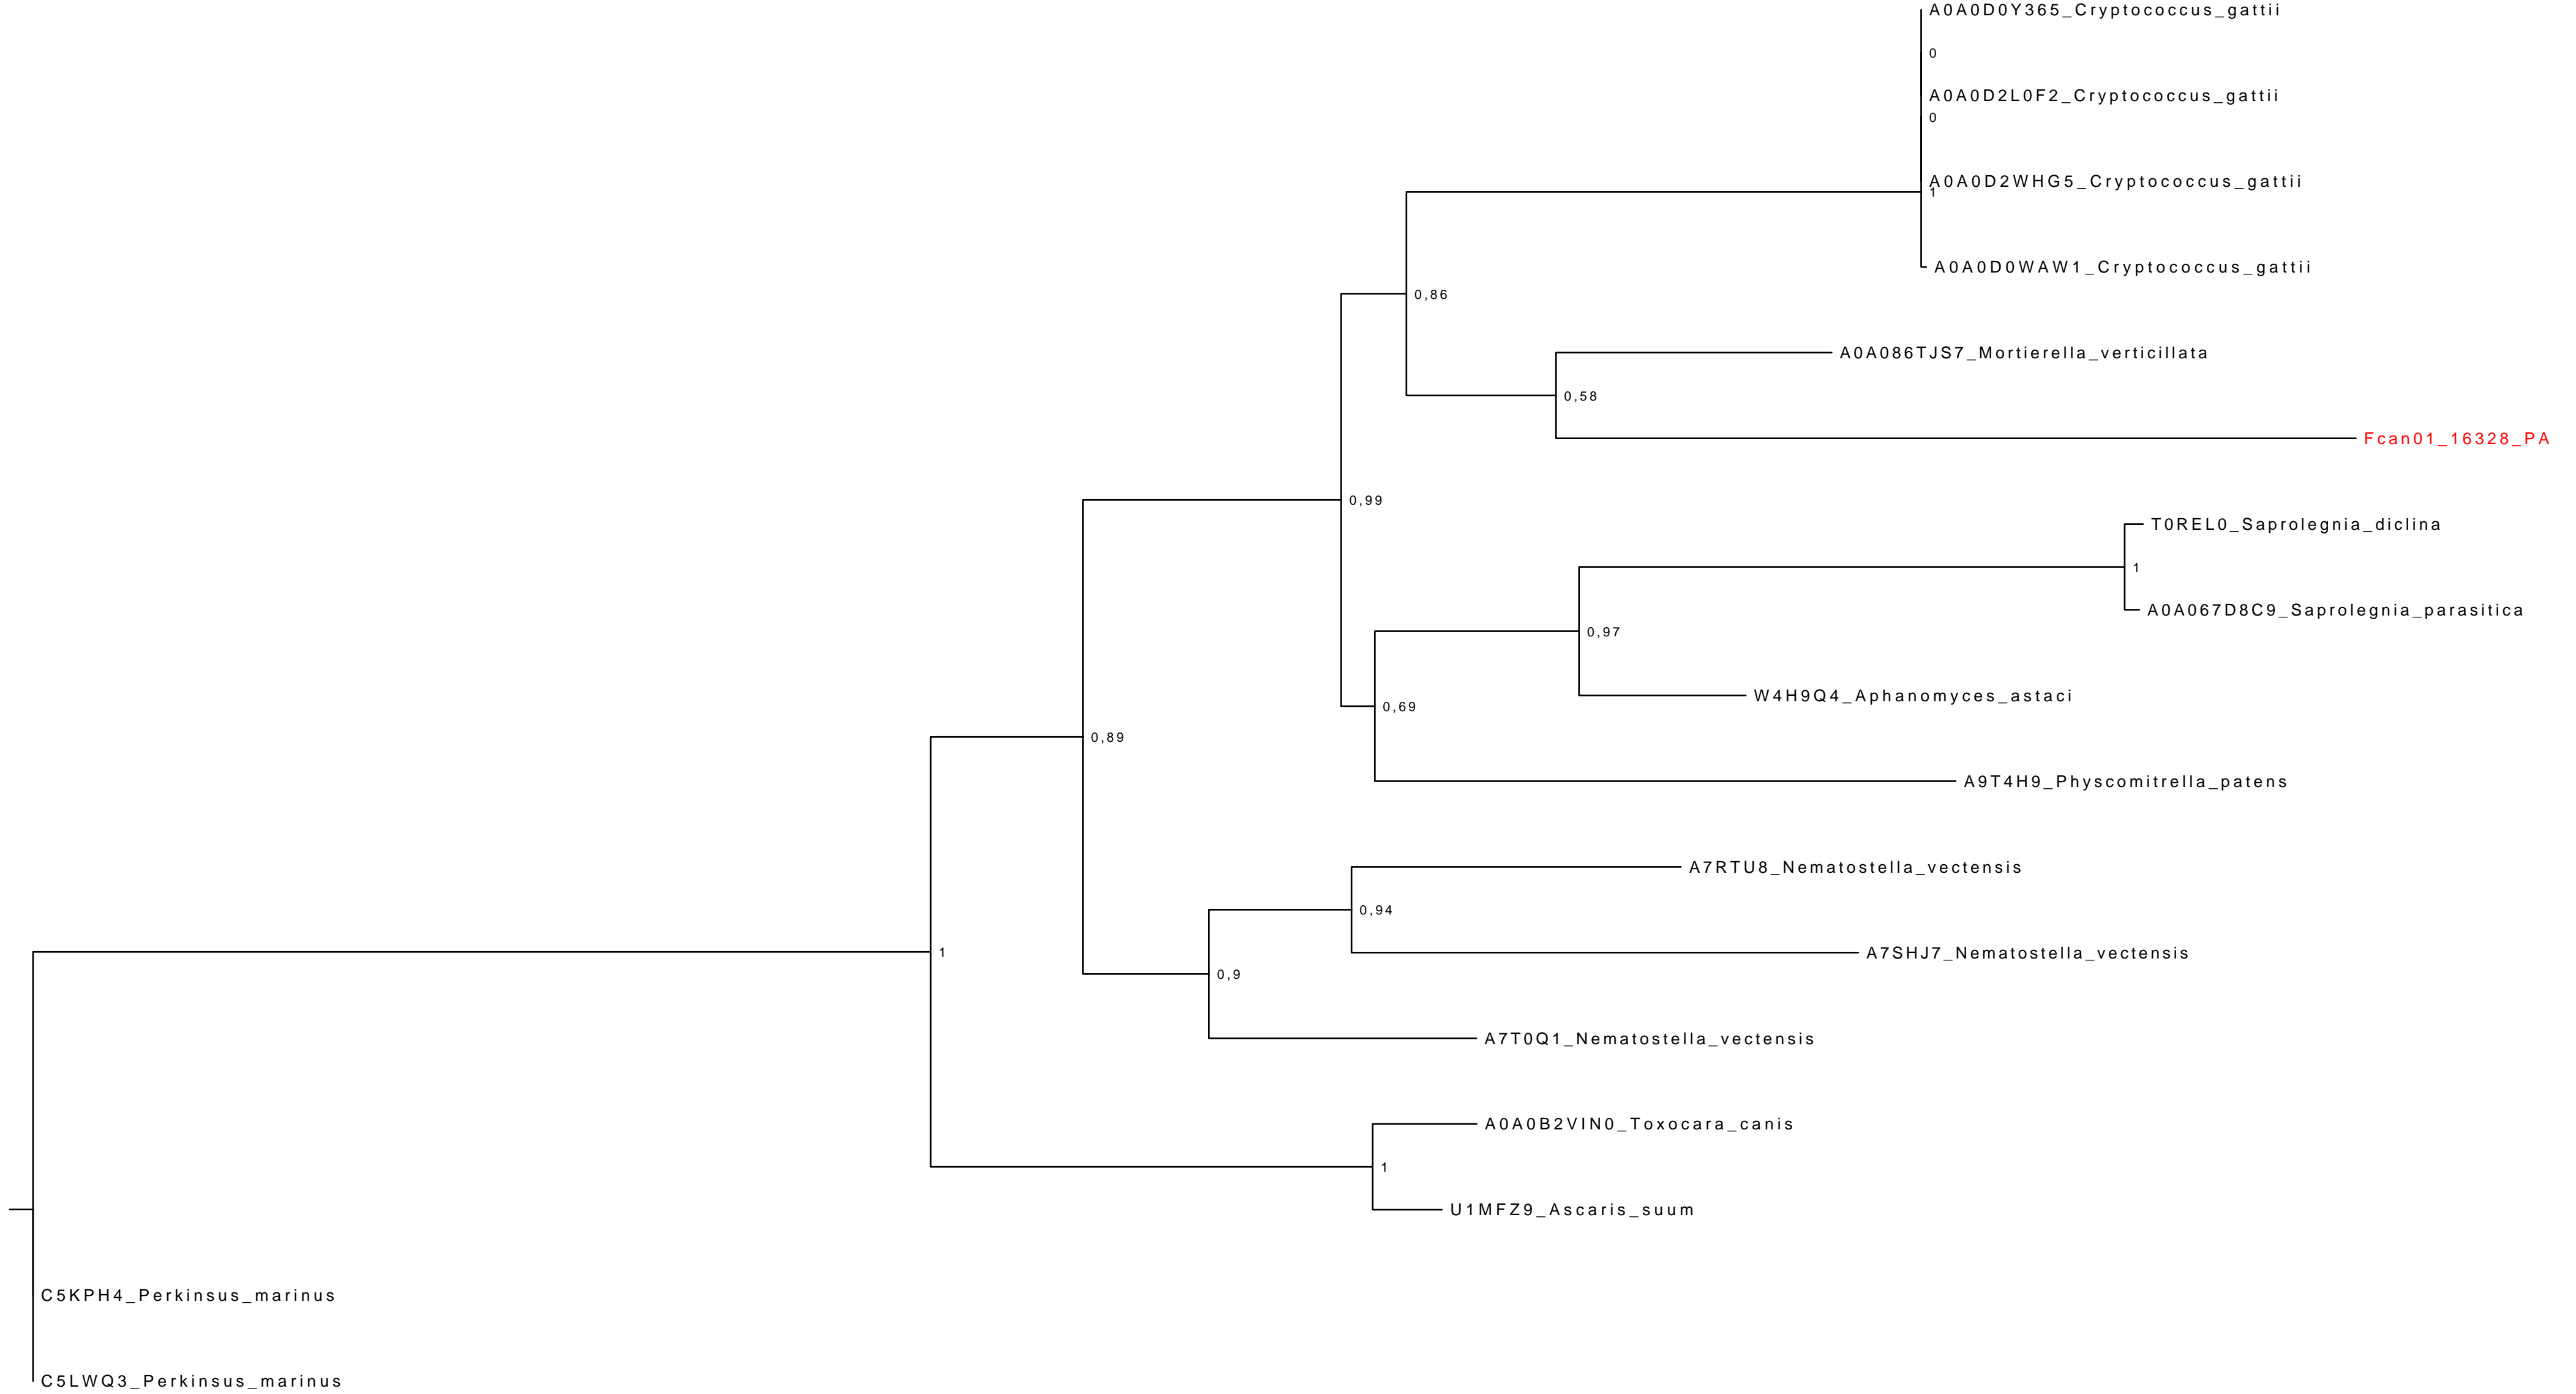

A0A0D0Y365\_Cryptococcus\_gattii  
0  
A0A0D2L0F2\_Cryptococcus\_gattii  
0  
A0A0D2WHG5\_Cryptococcus\_gattii  
1  
A0A0D0WAW1\_Cryptococcus\_gattii

A0A086TJS7\_Mortierella\_verticillata

Fcan01\_16328\_PA

T0REL0\_Saprolegnia\_diclina  
1  
A0A067D8C9\_Saprolegnia\_parasitica

W4H9Q4\_Aphanomyces\_astaci

A9T4H9\_Physcomitrella\_patens

A7RTU8\_Nematostella\_vectensis

A7SHJ7\_Nematostella\_vectensis

A7T0Q1\_Nematostella\_vectensis

A0A0B2VIN0\_Toxocara\_canis

U1MFZ9\_Ascaris\_suum

C5KPH4\_Perkinsus\_marinus

C5LWQ3\_Perkinsus\_marinus

0.4

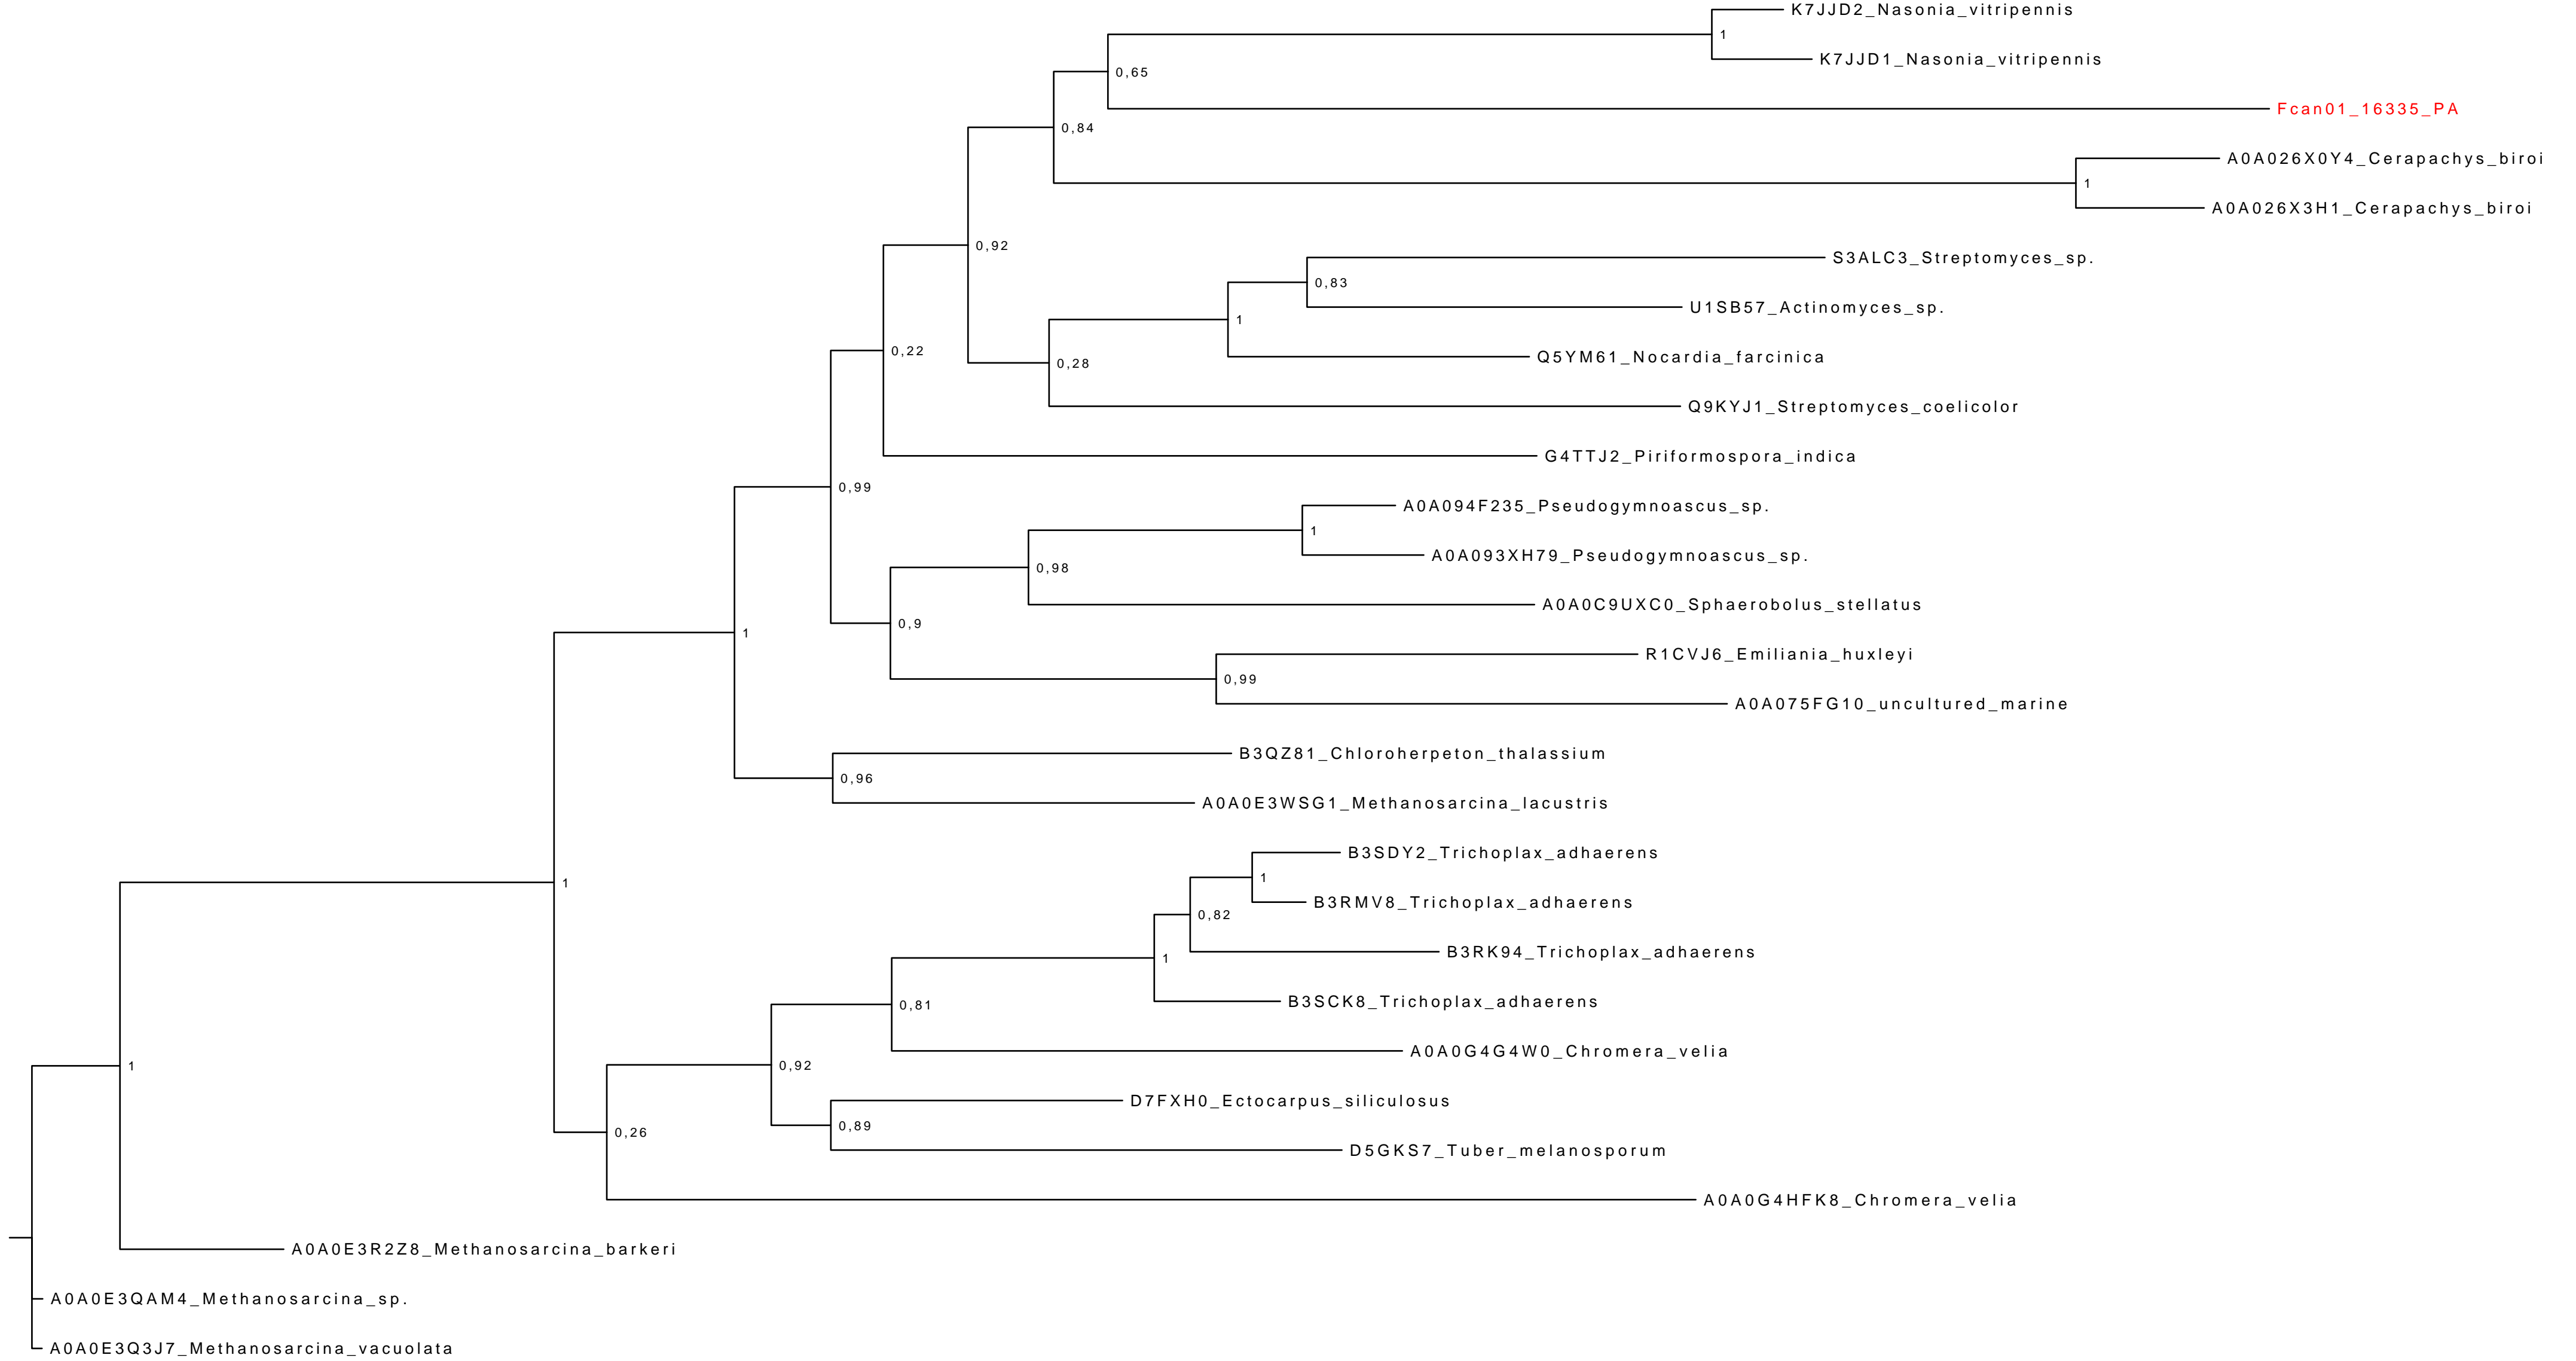



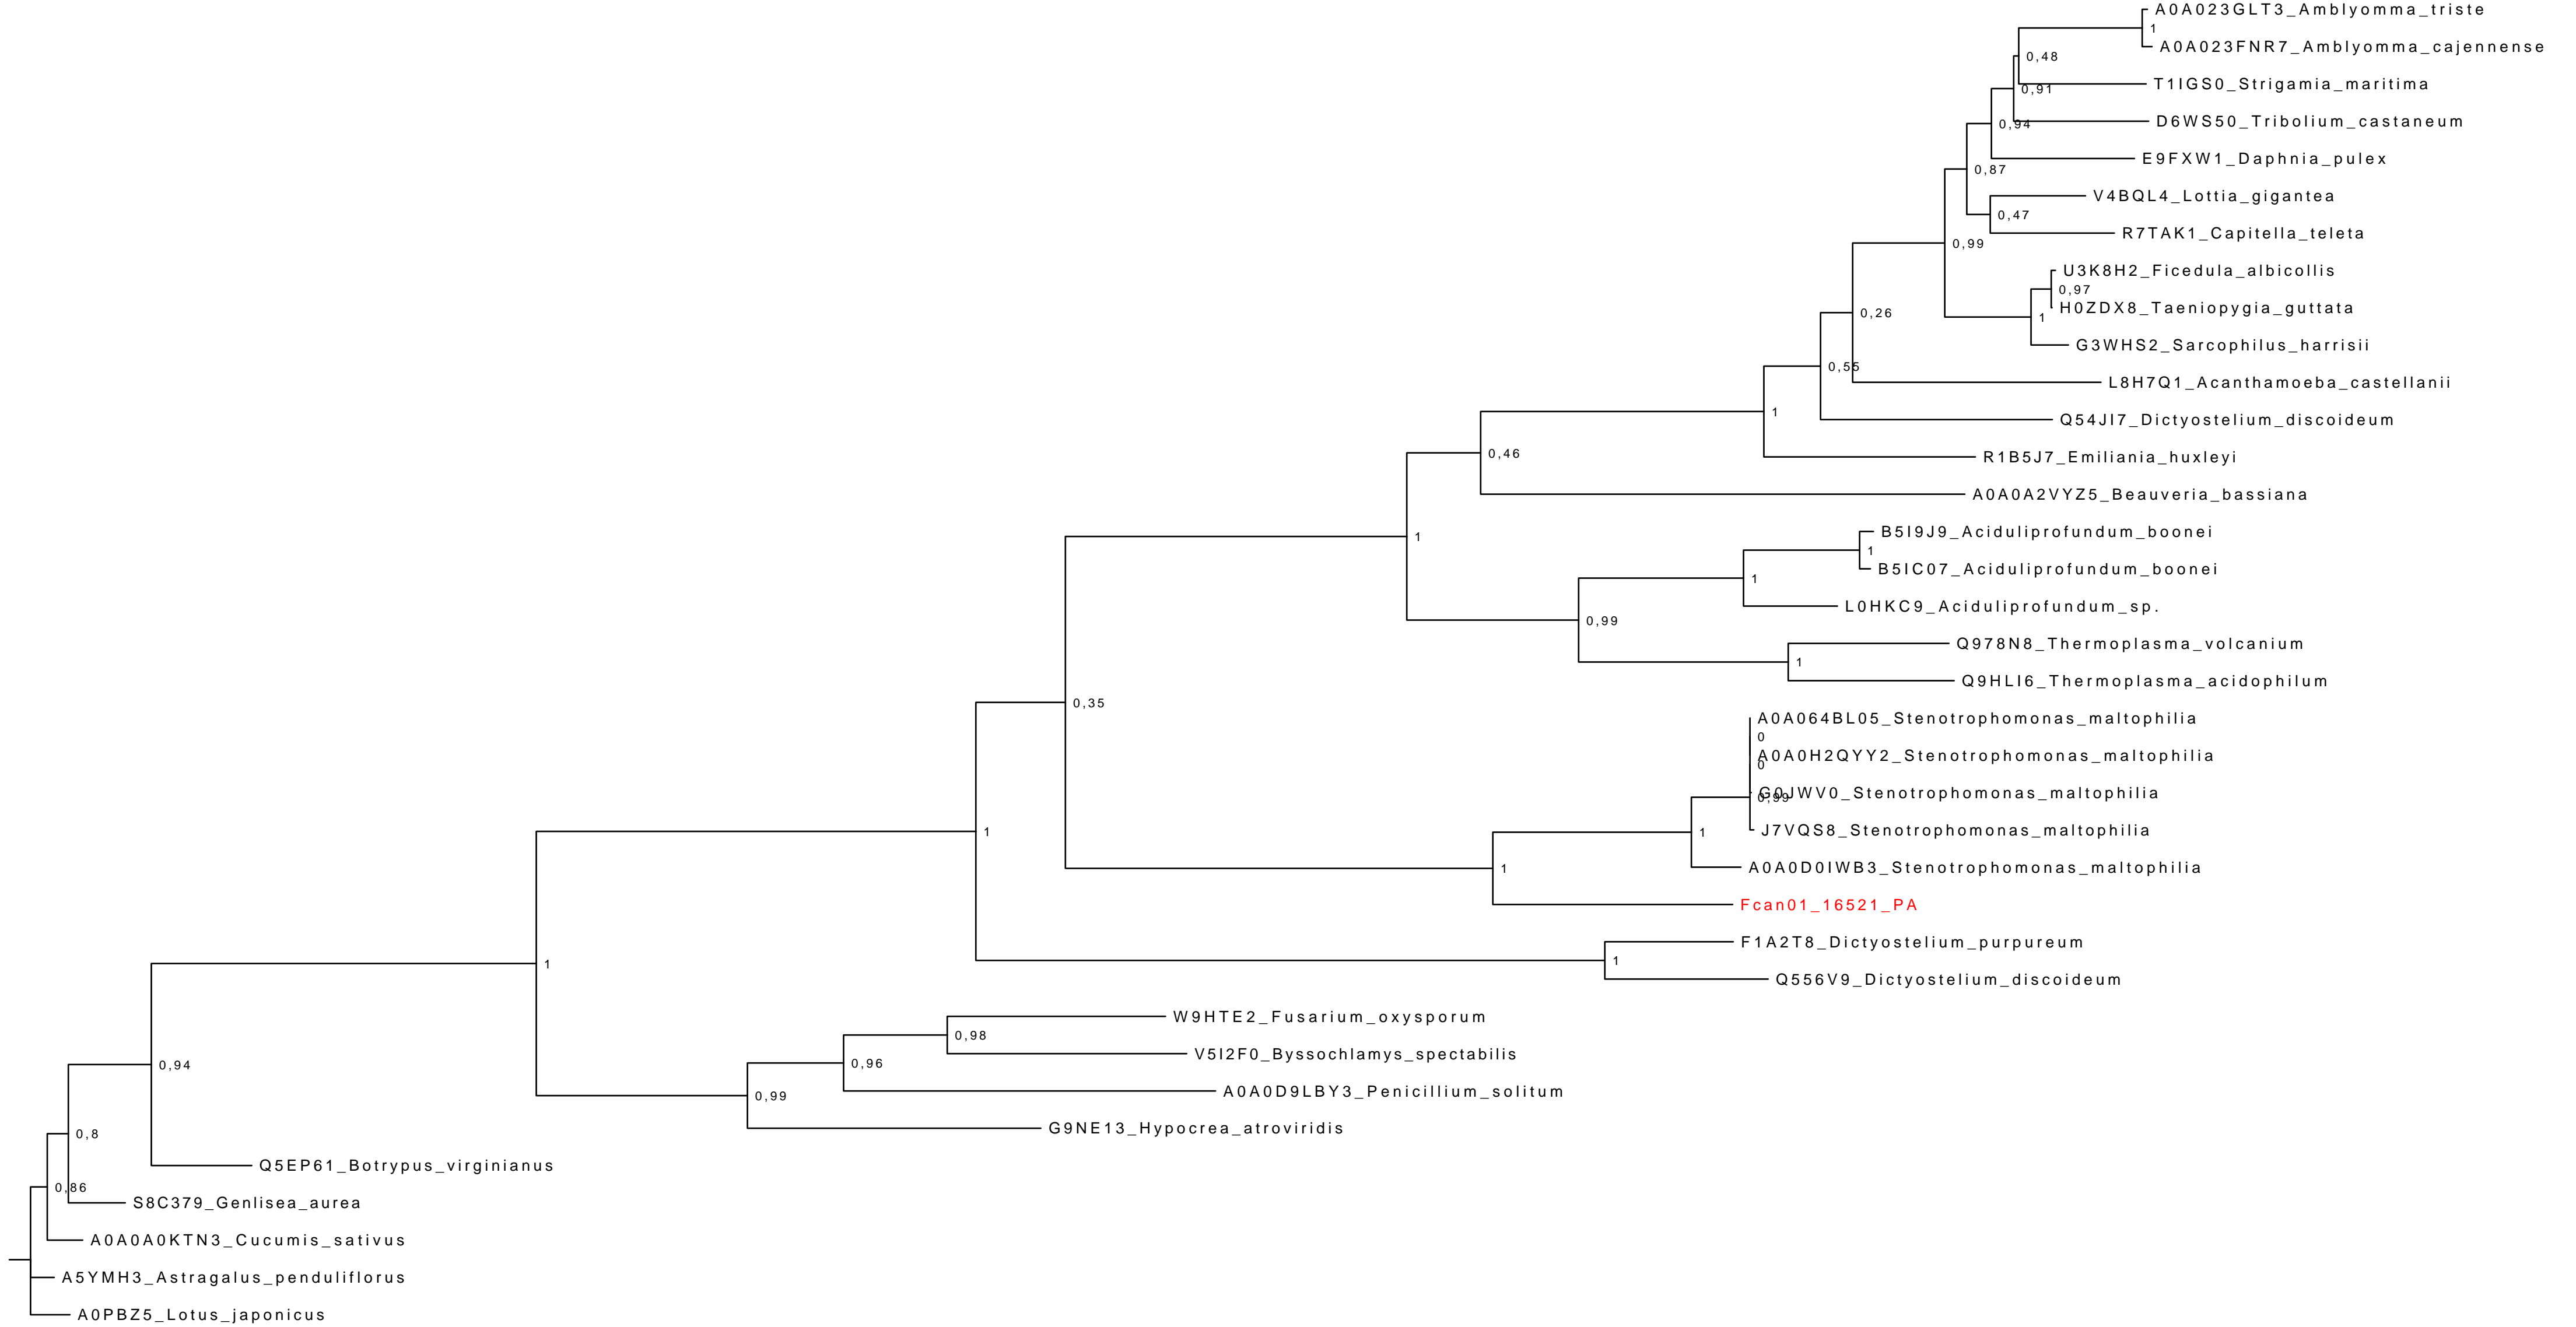

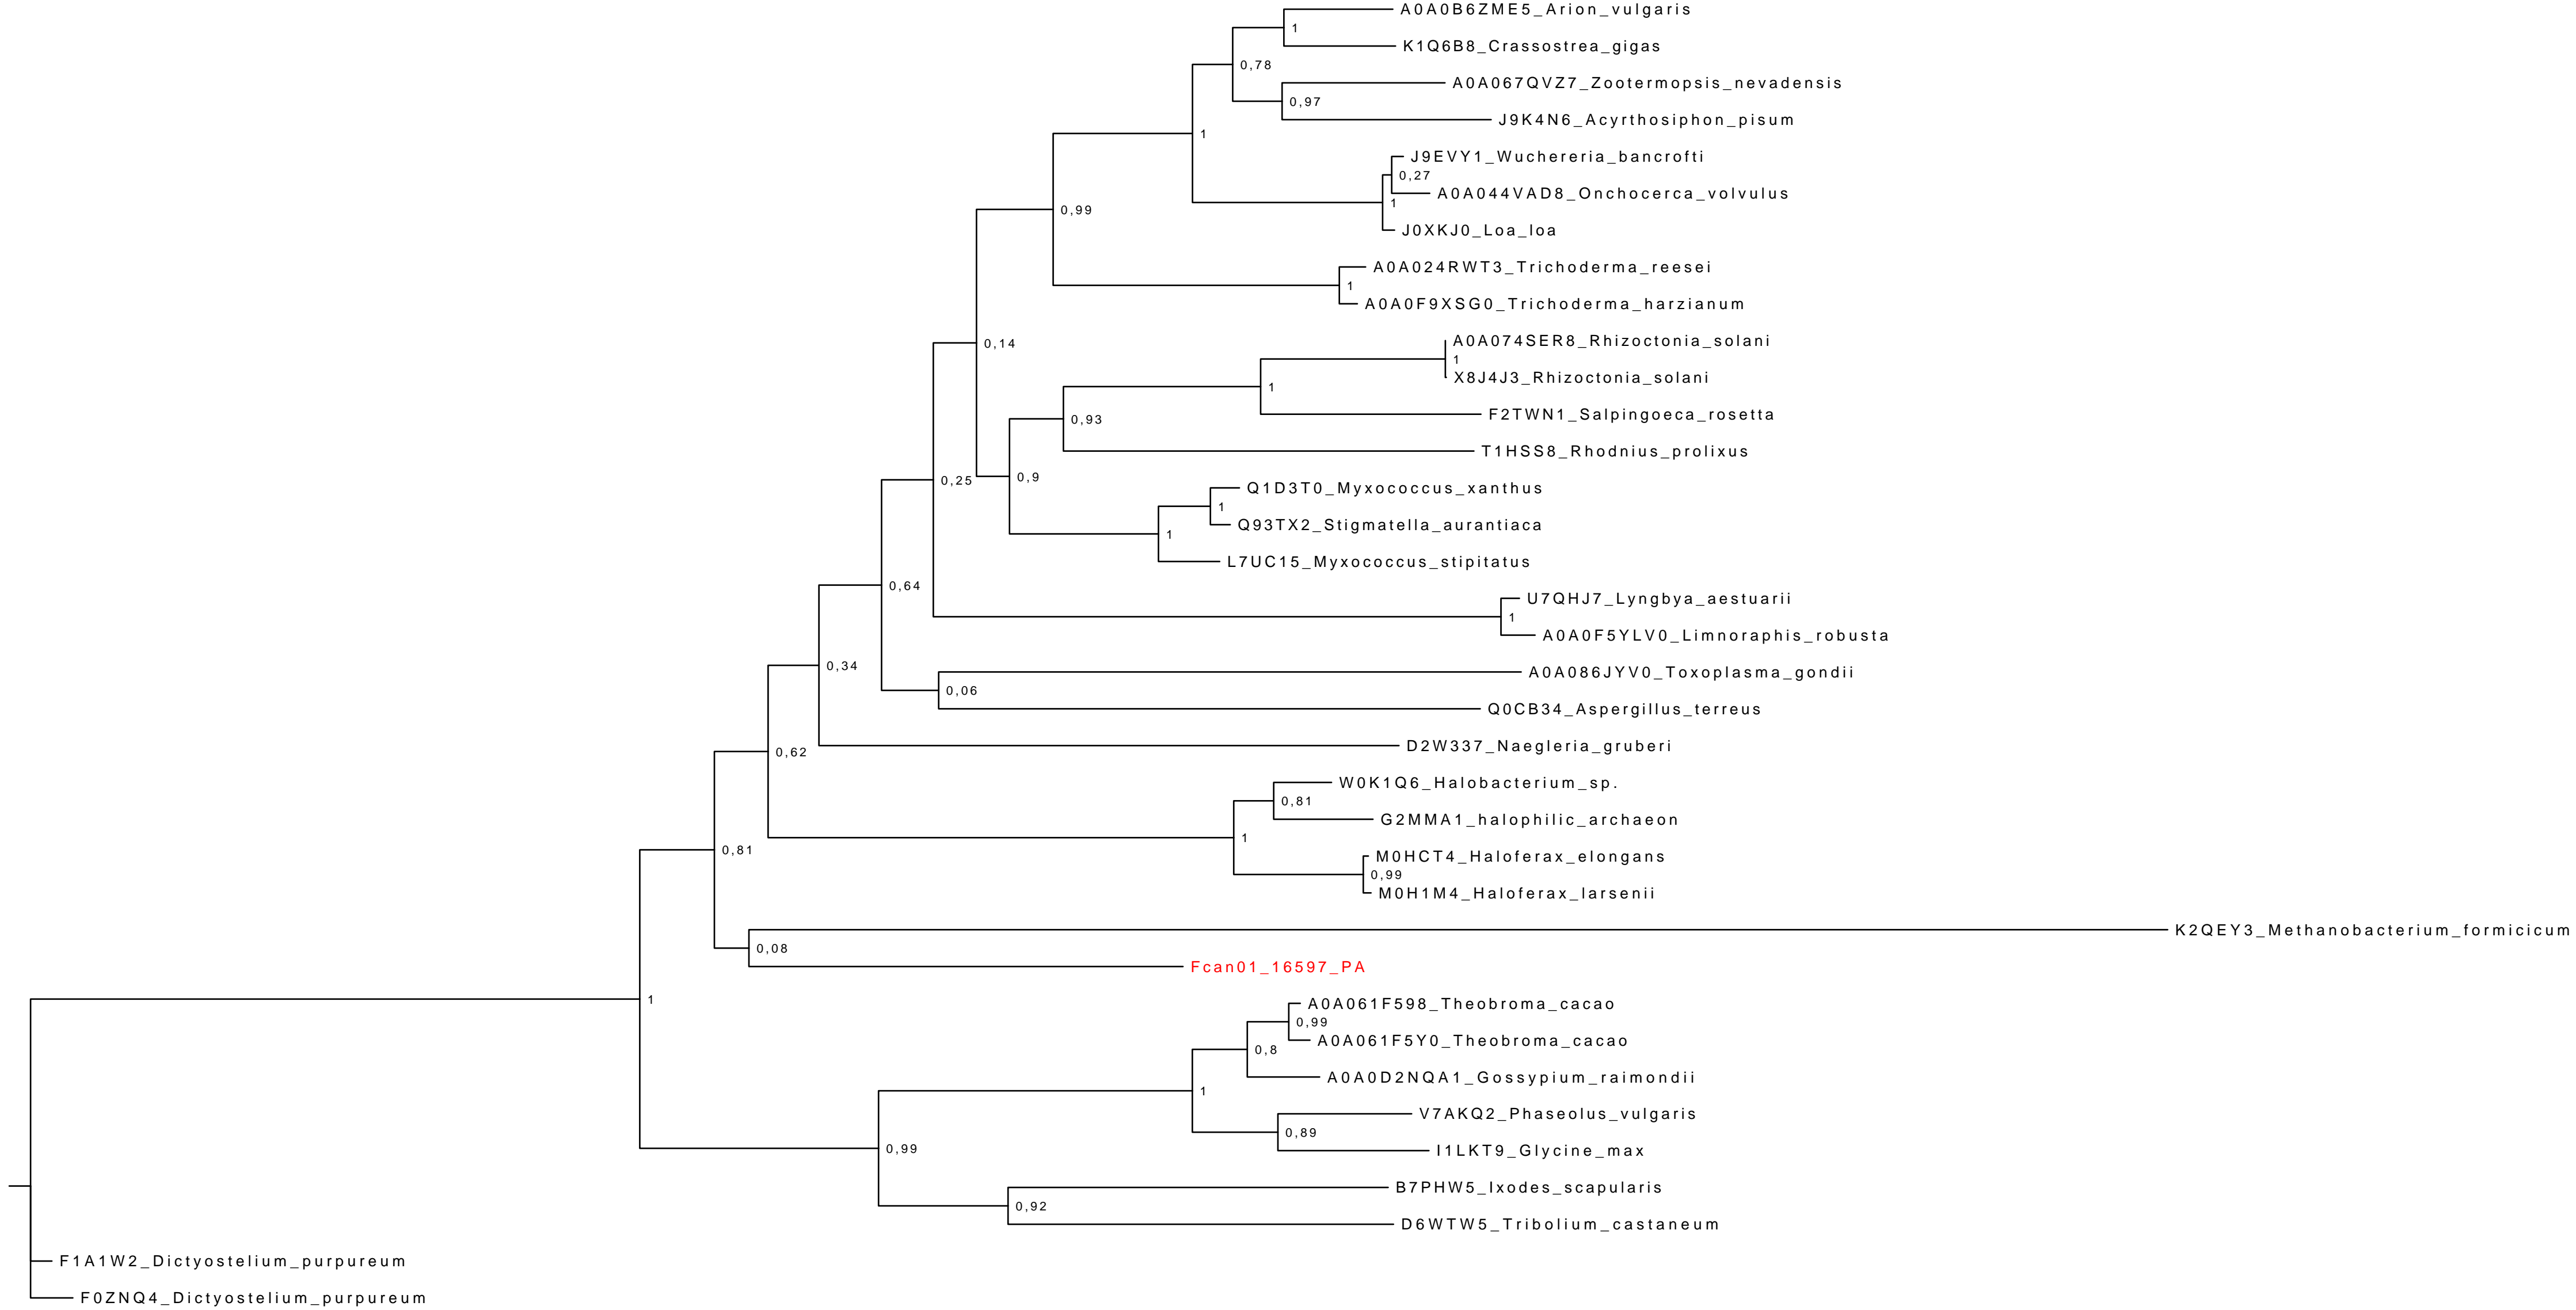

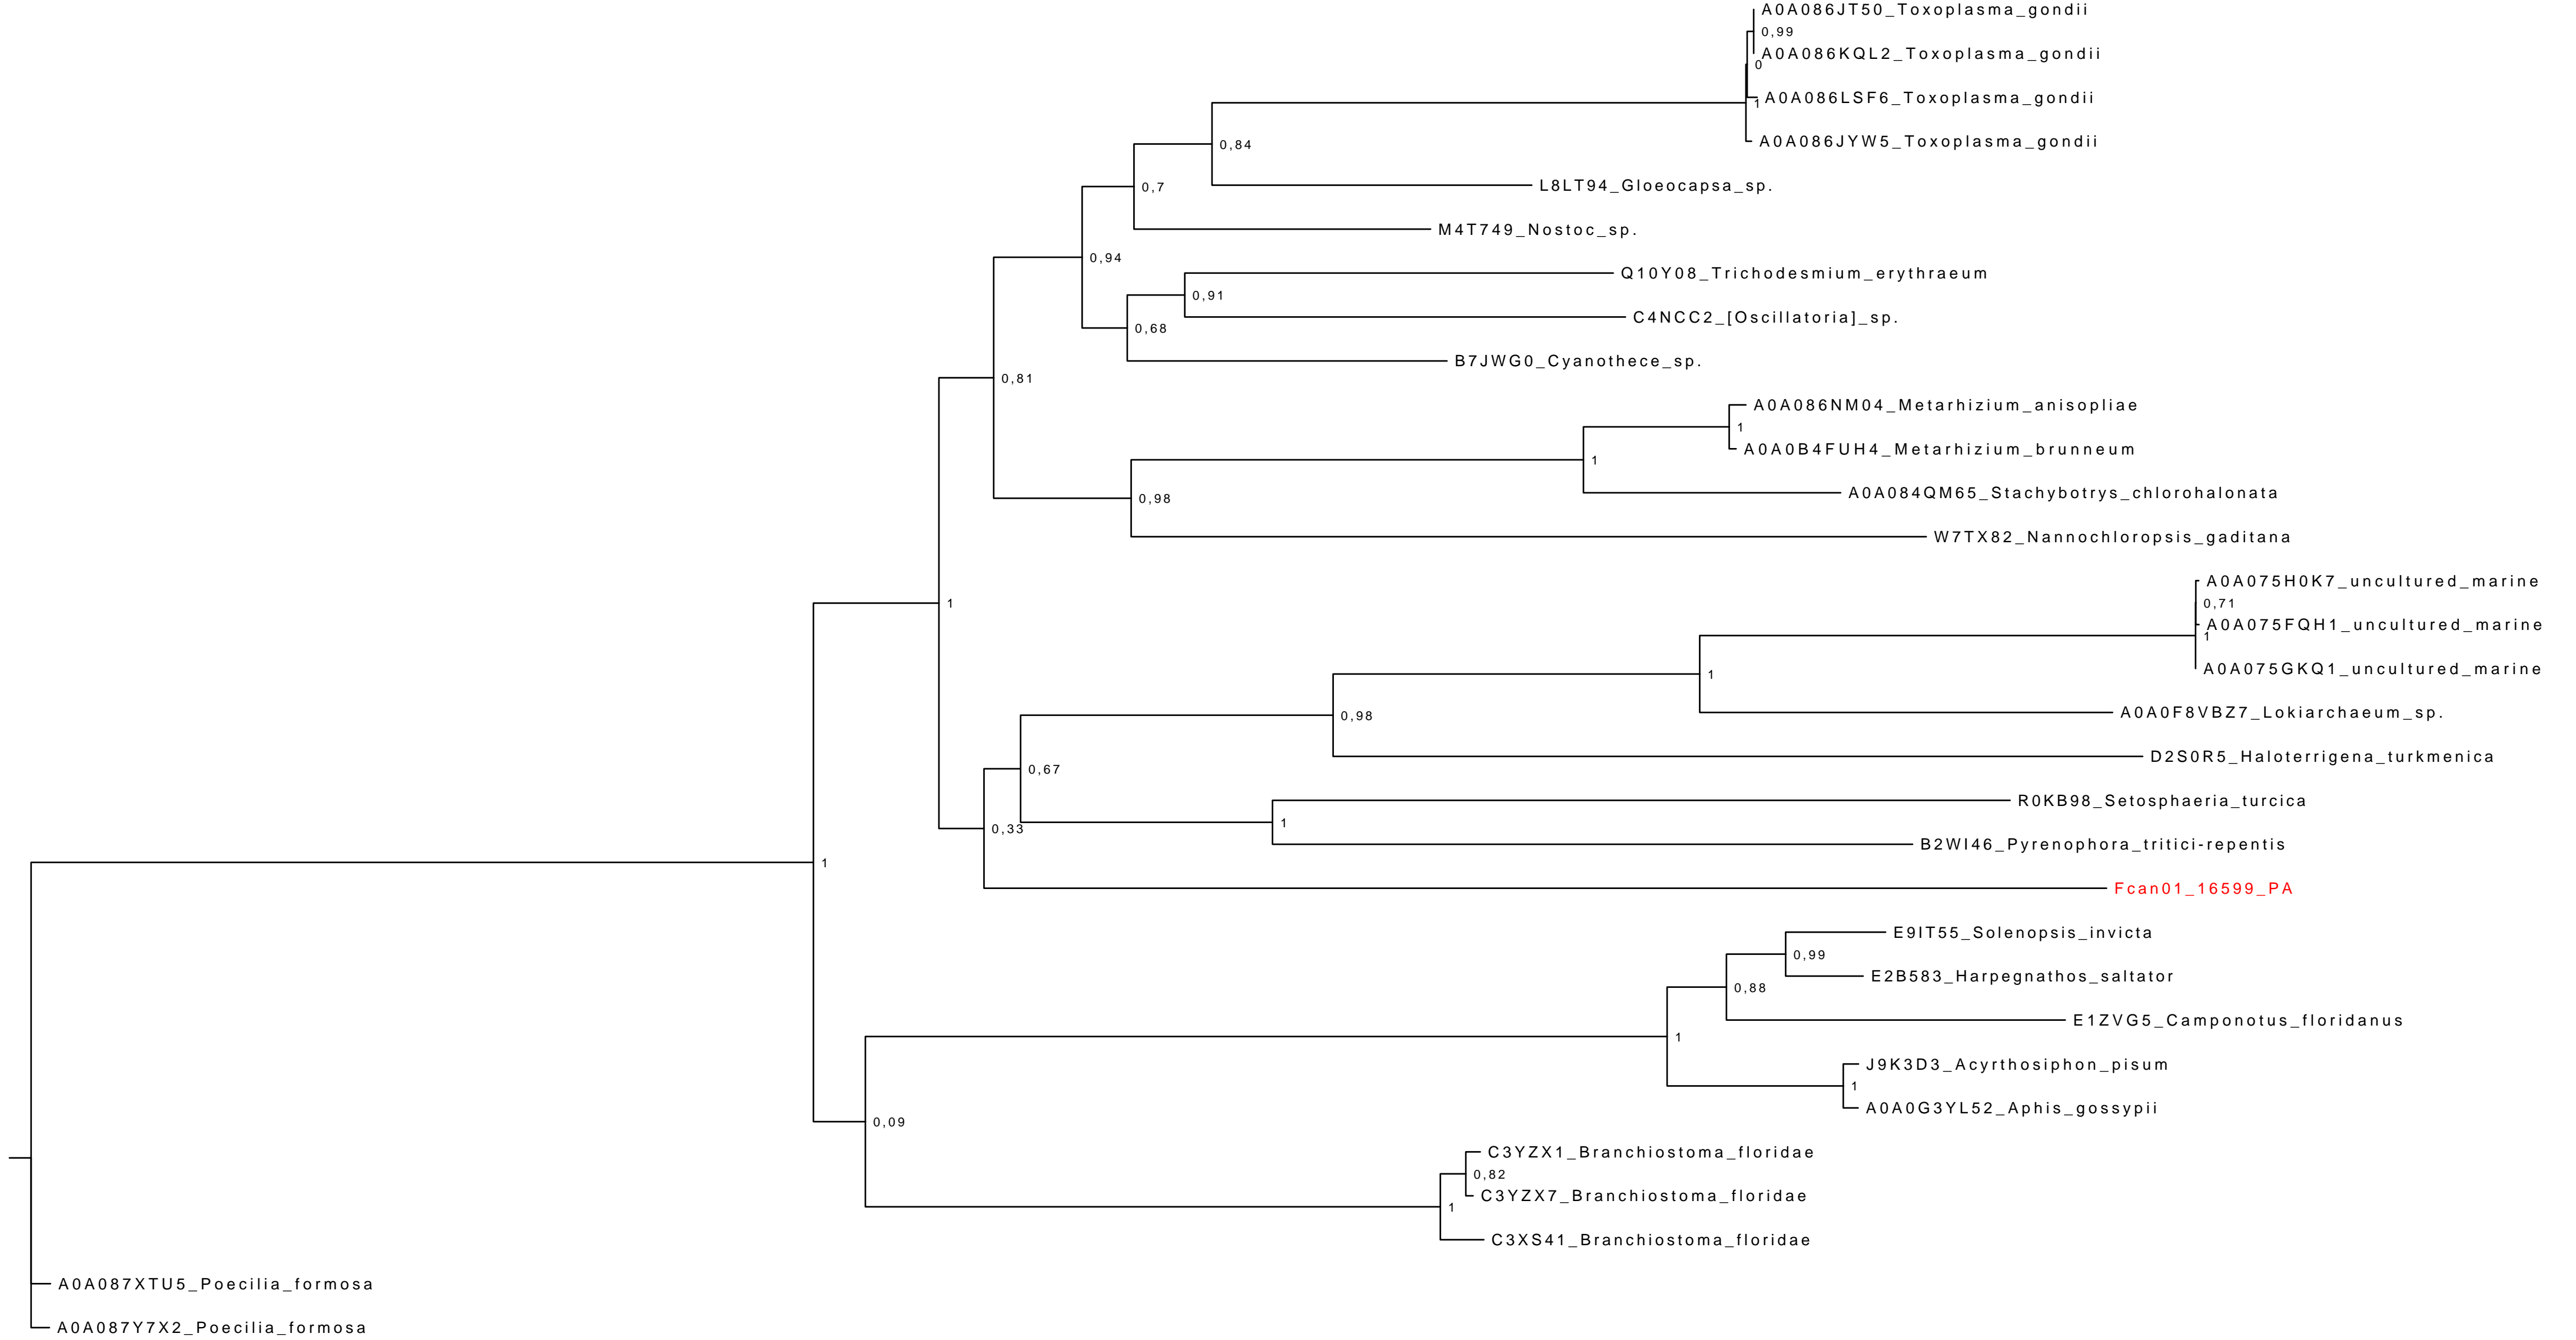

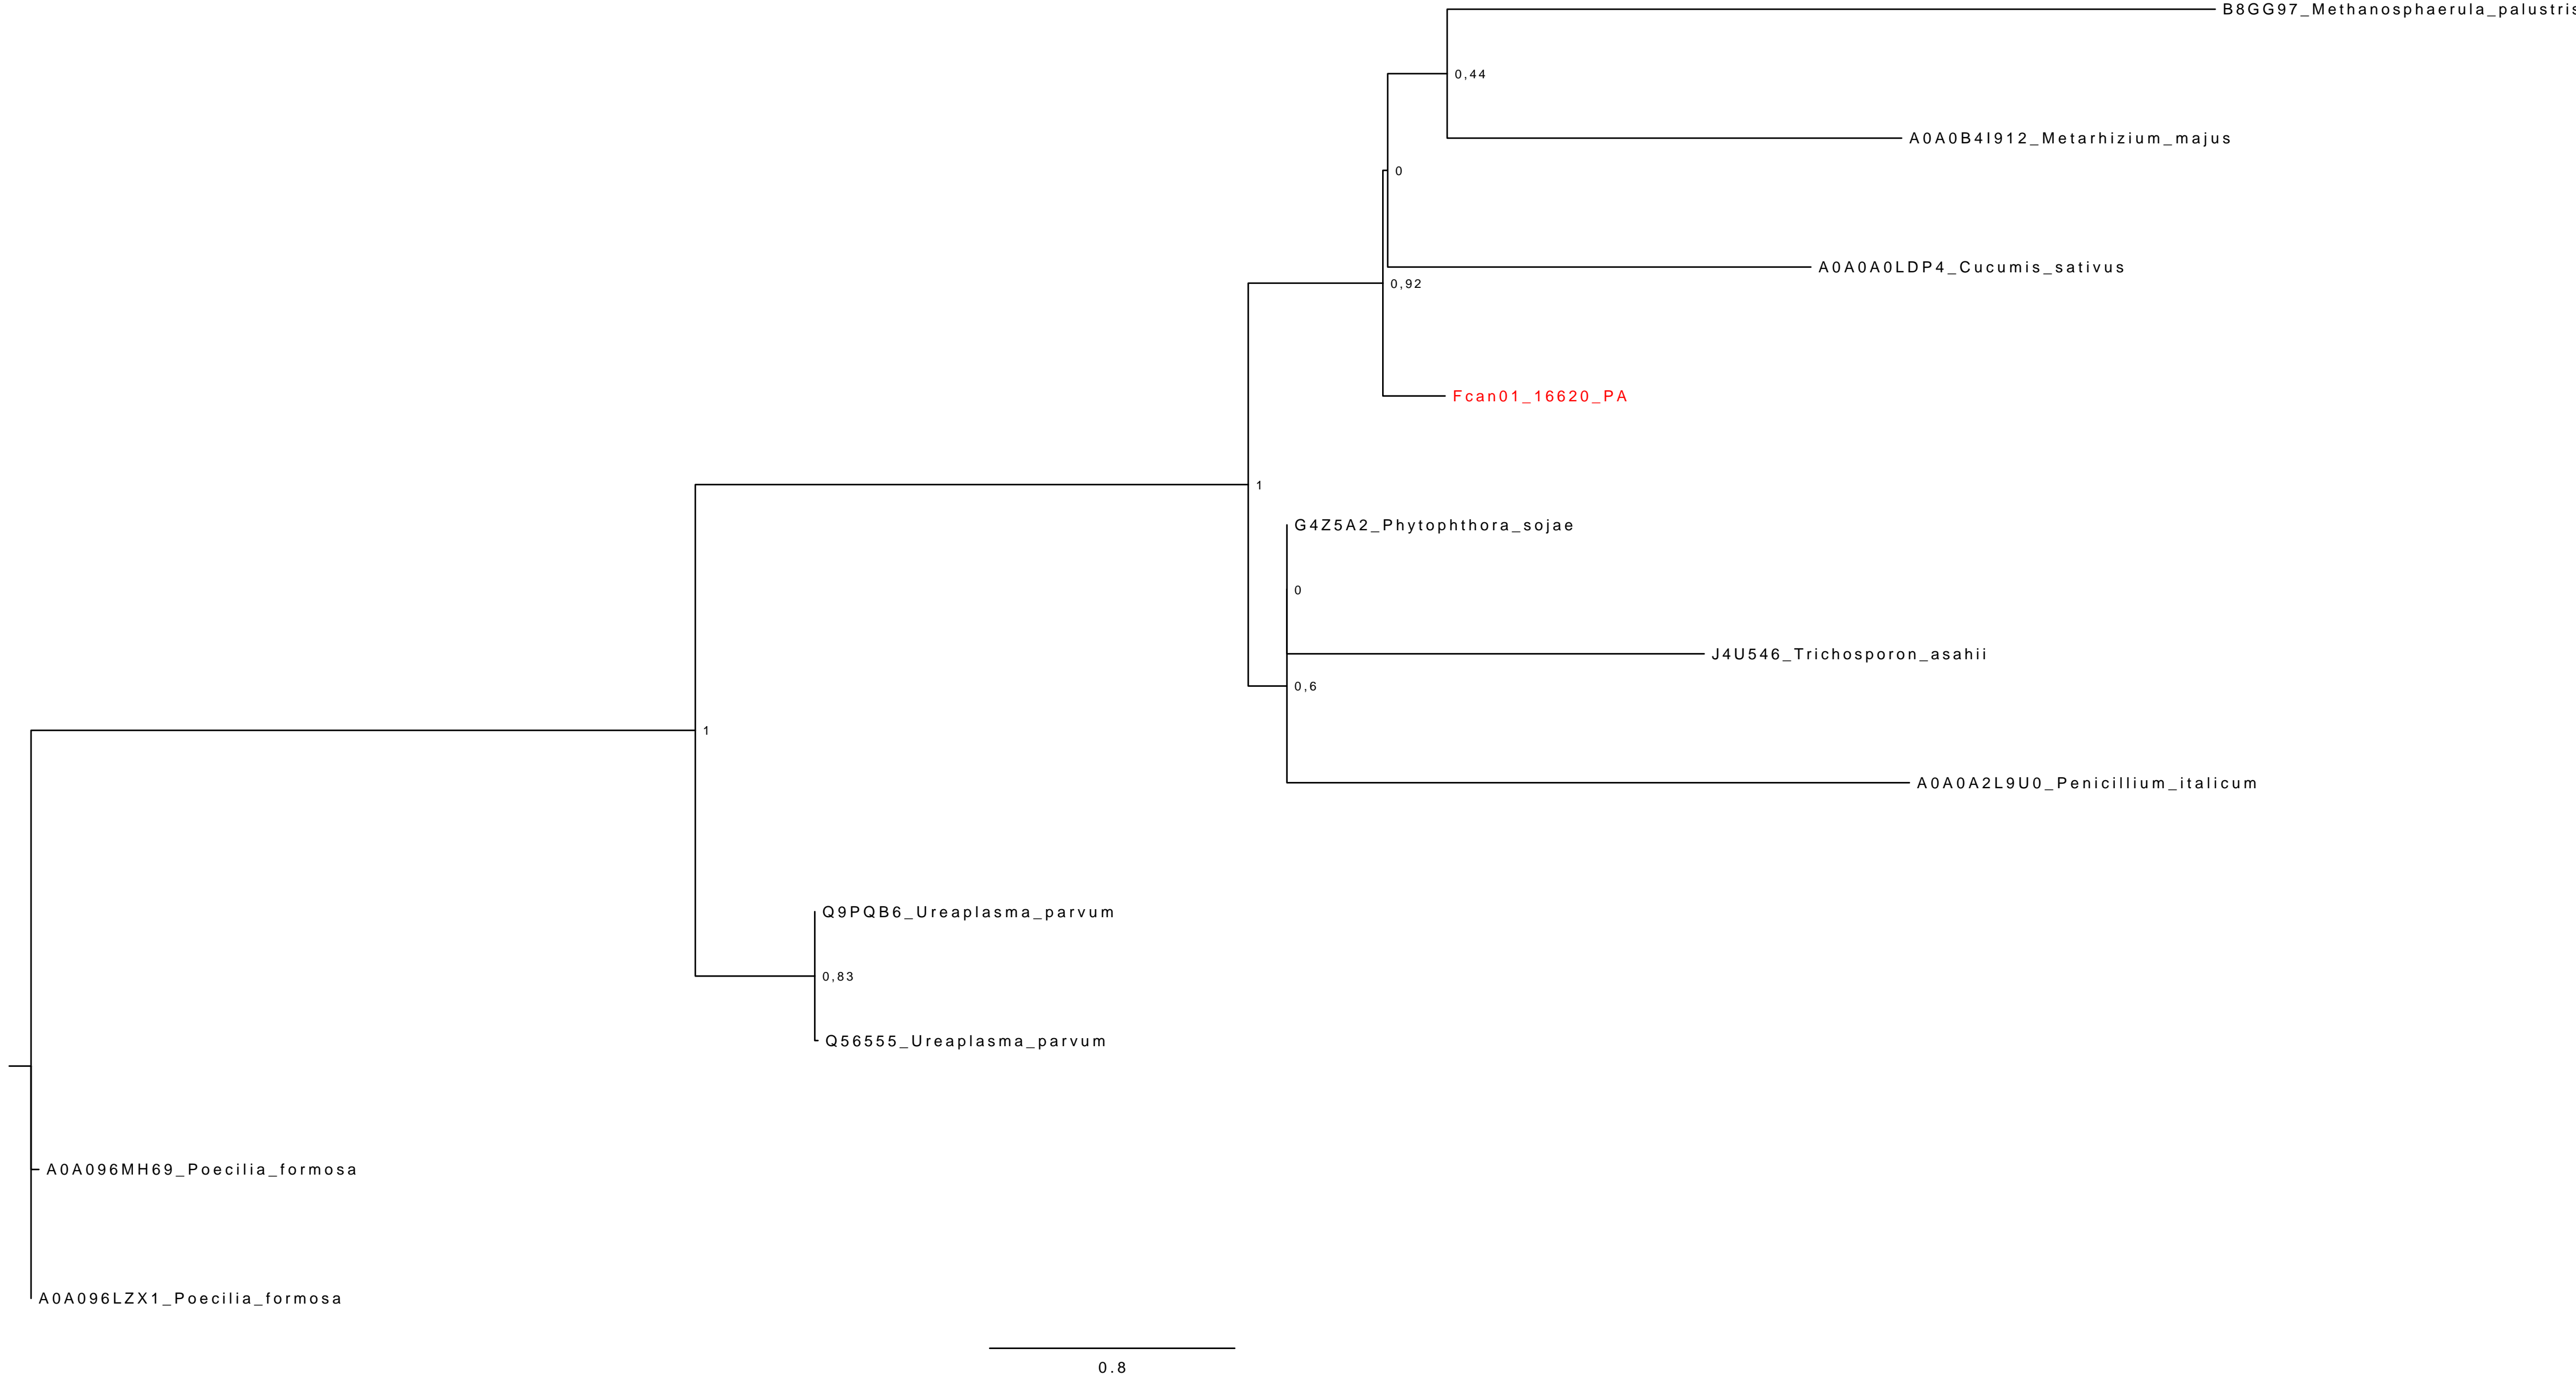

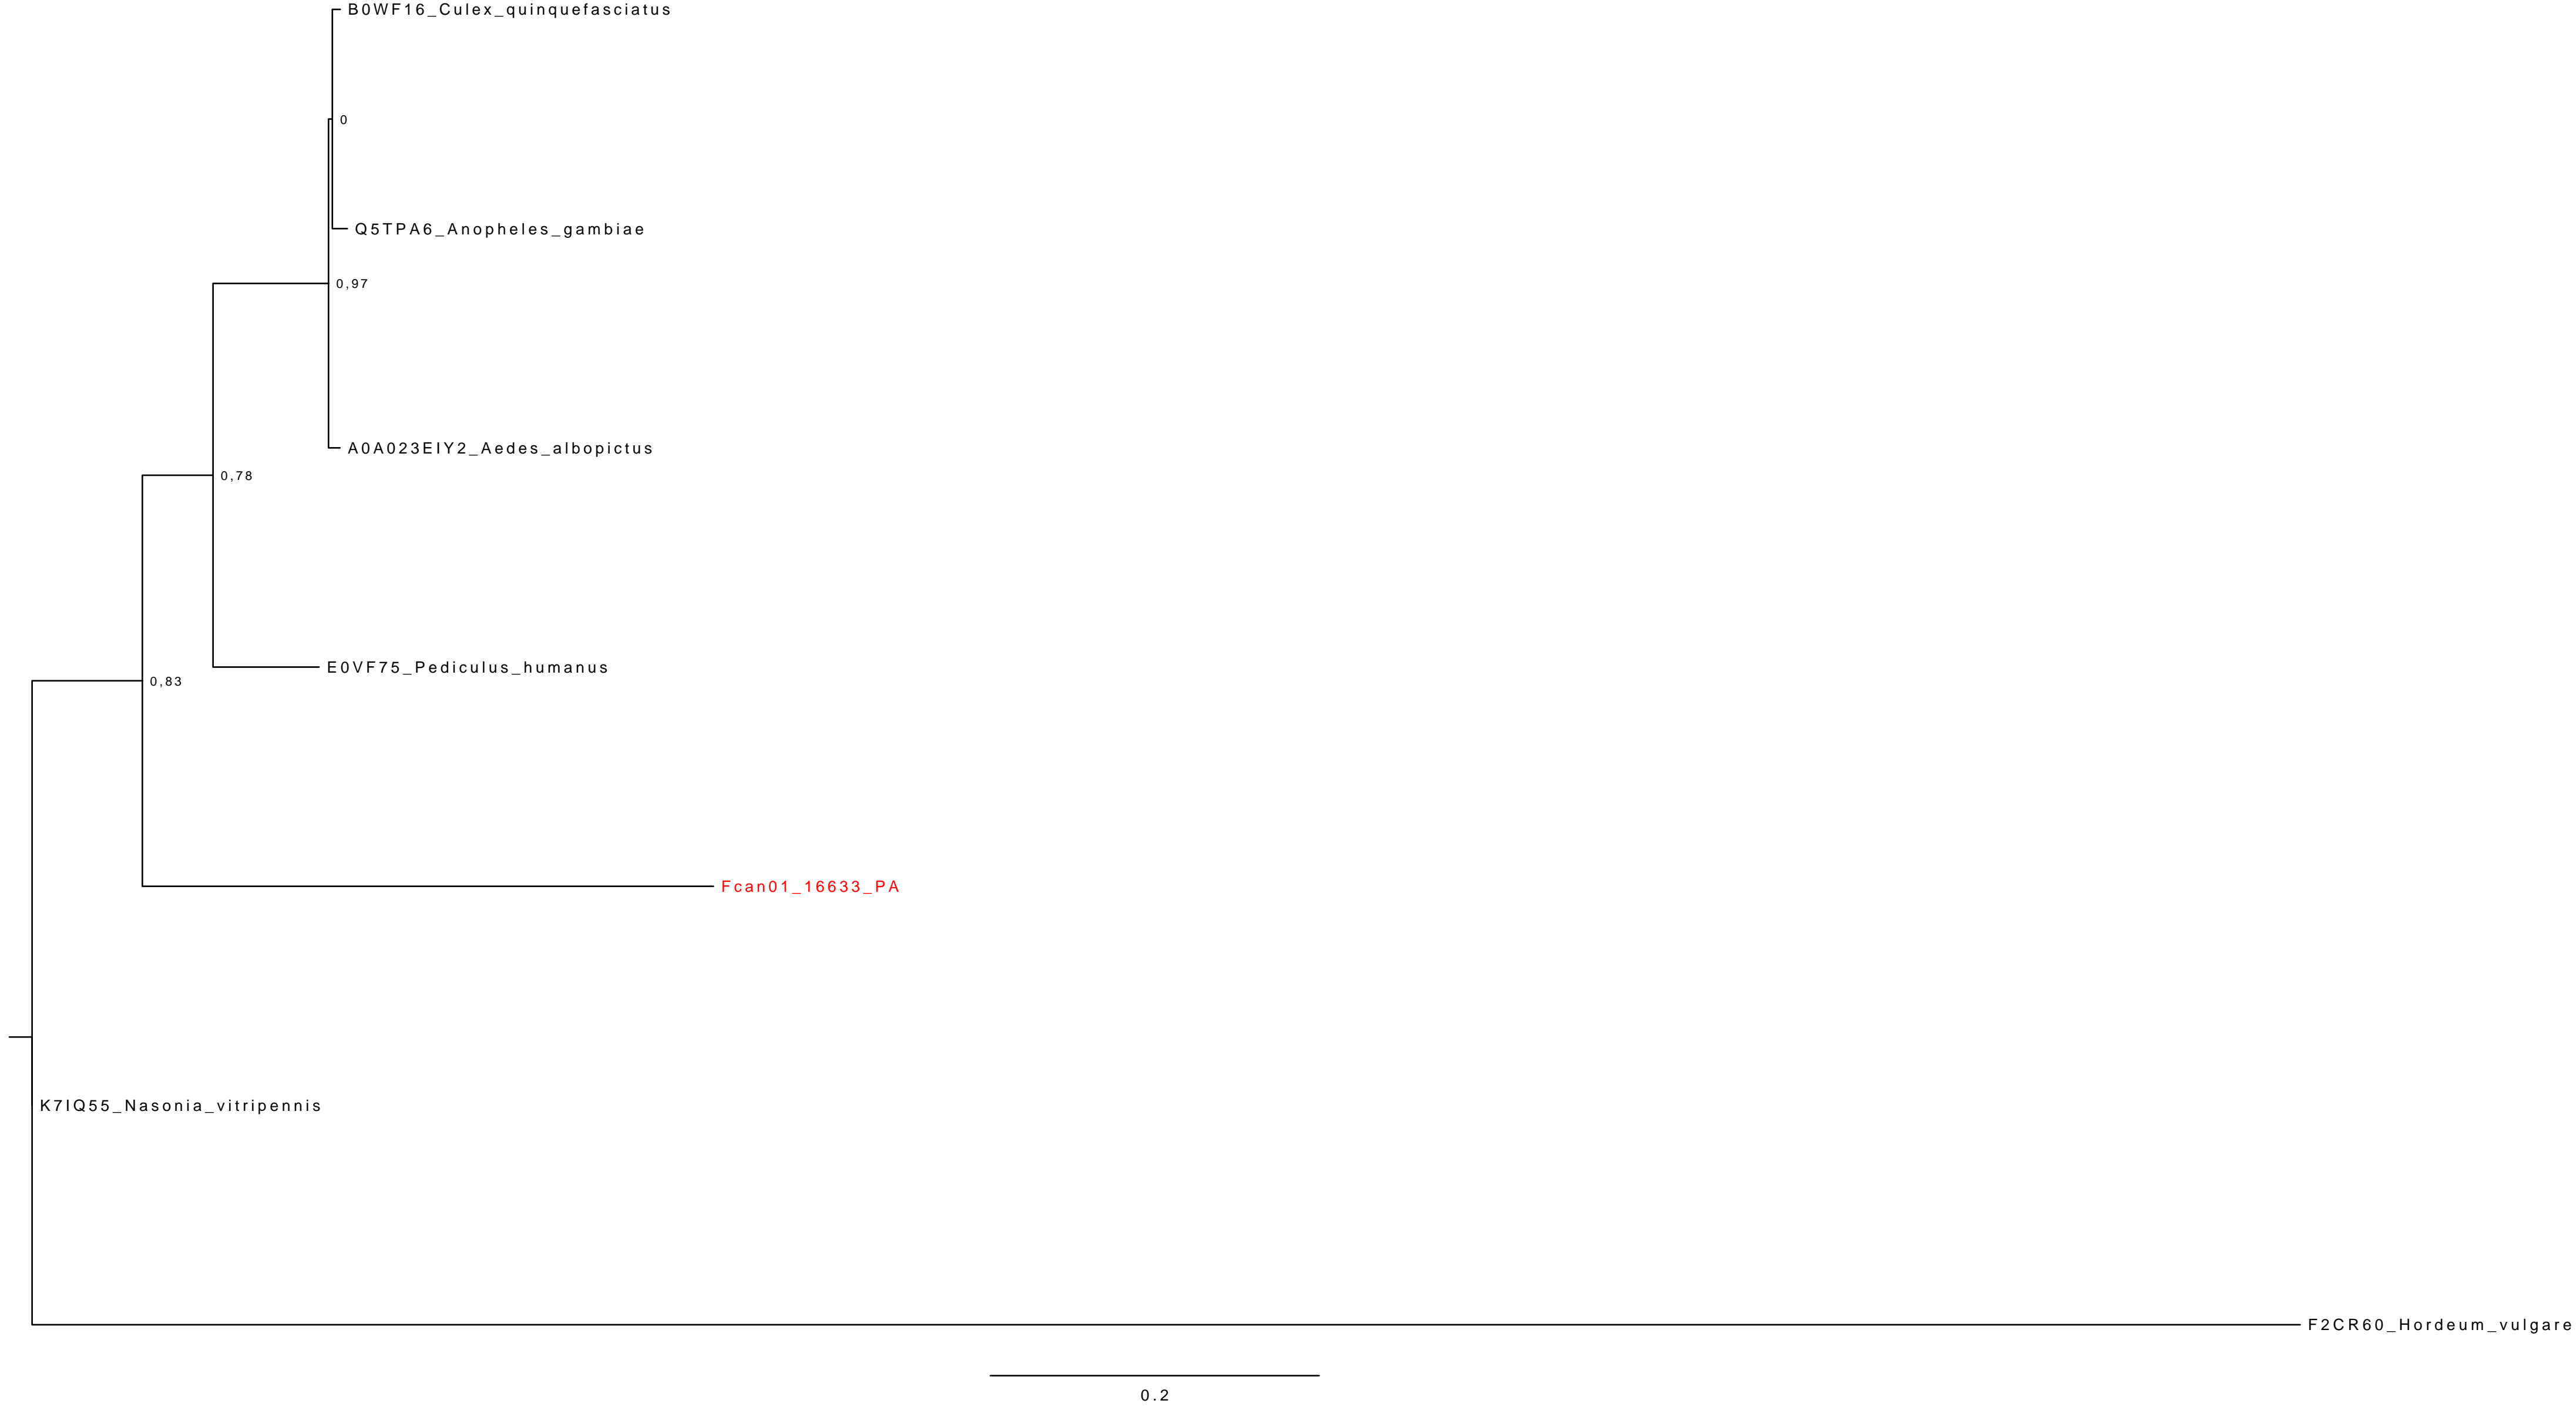

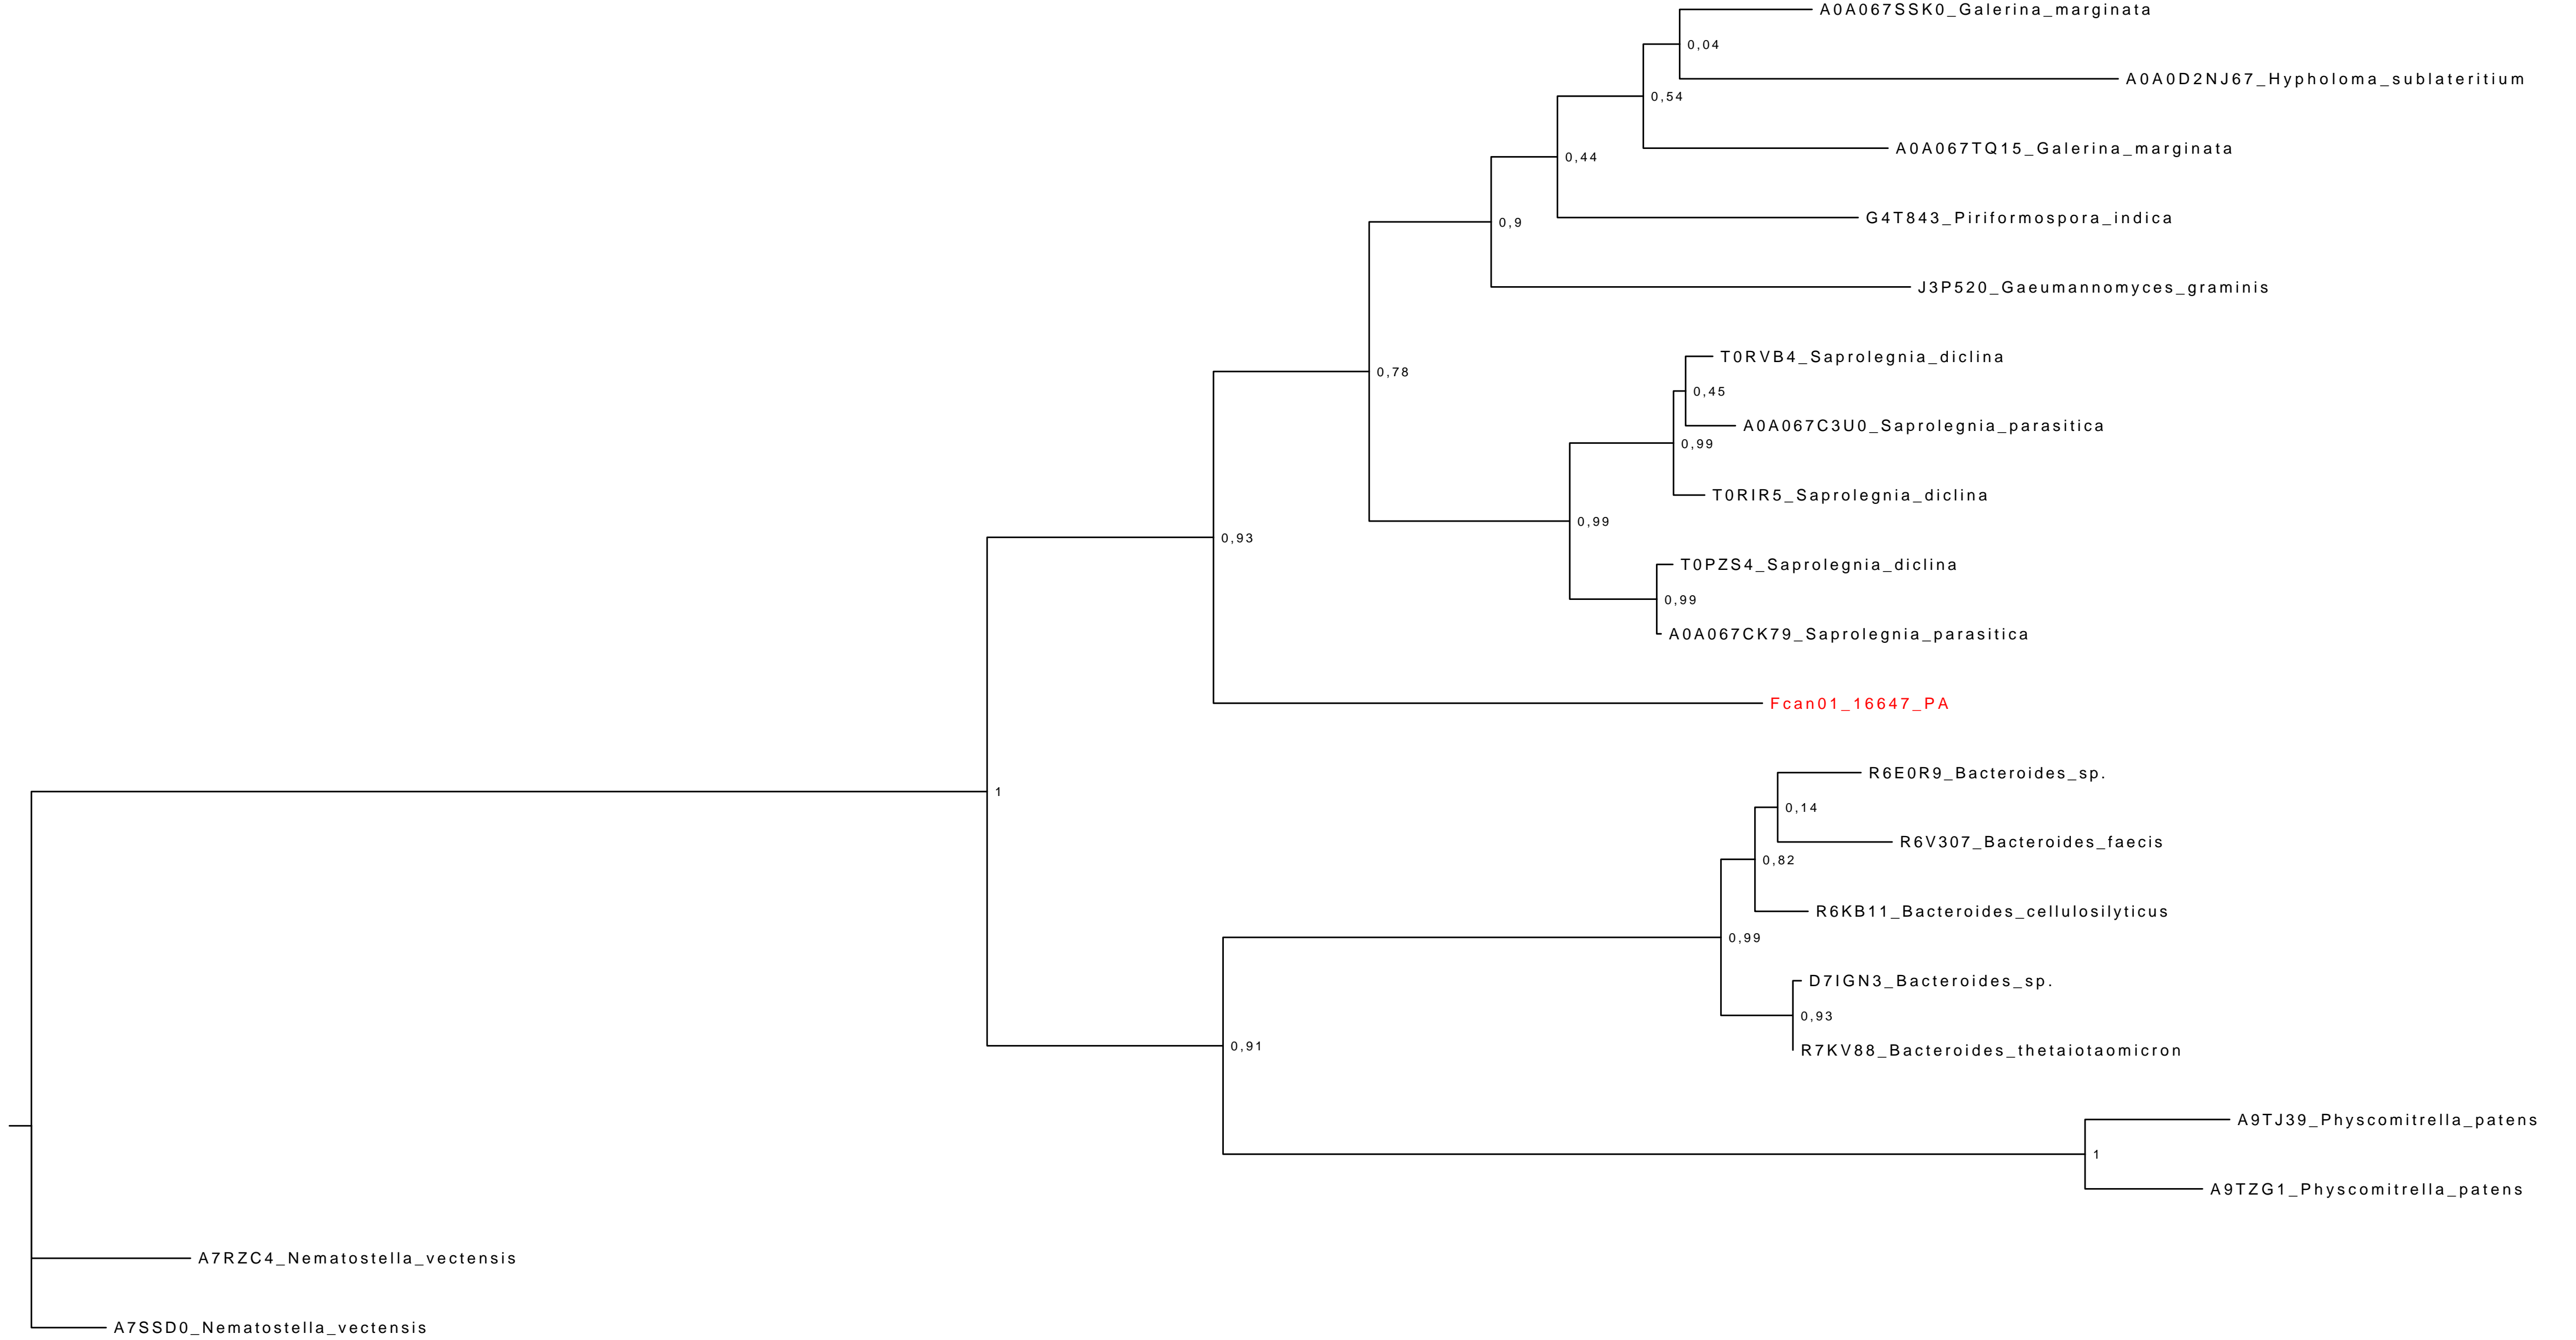

0.6

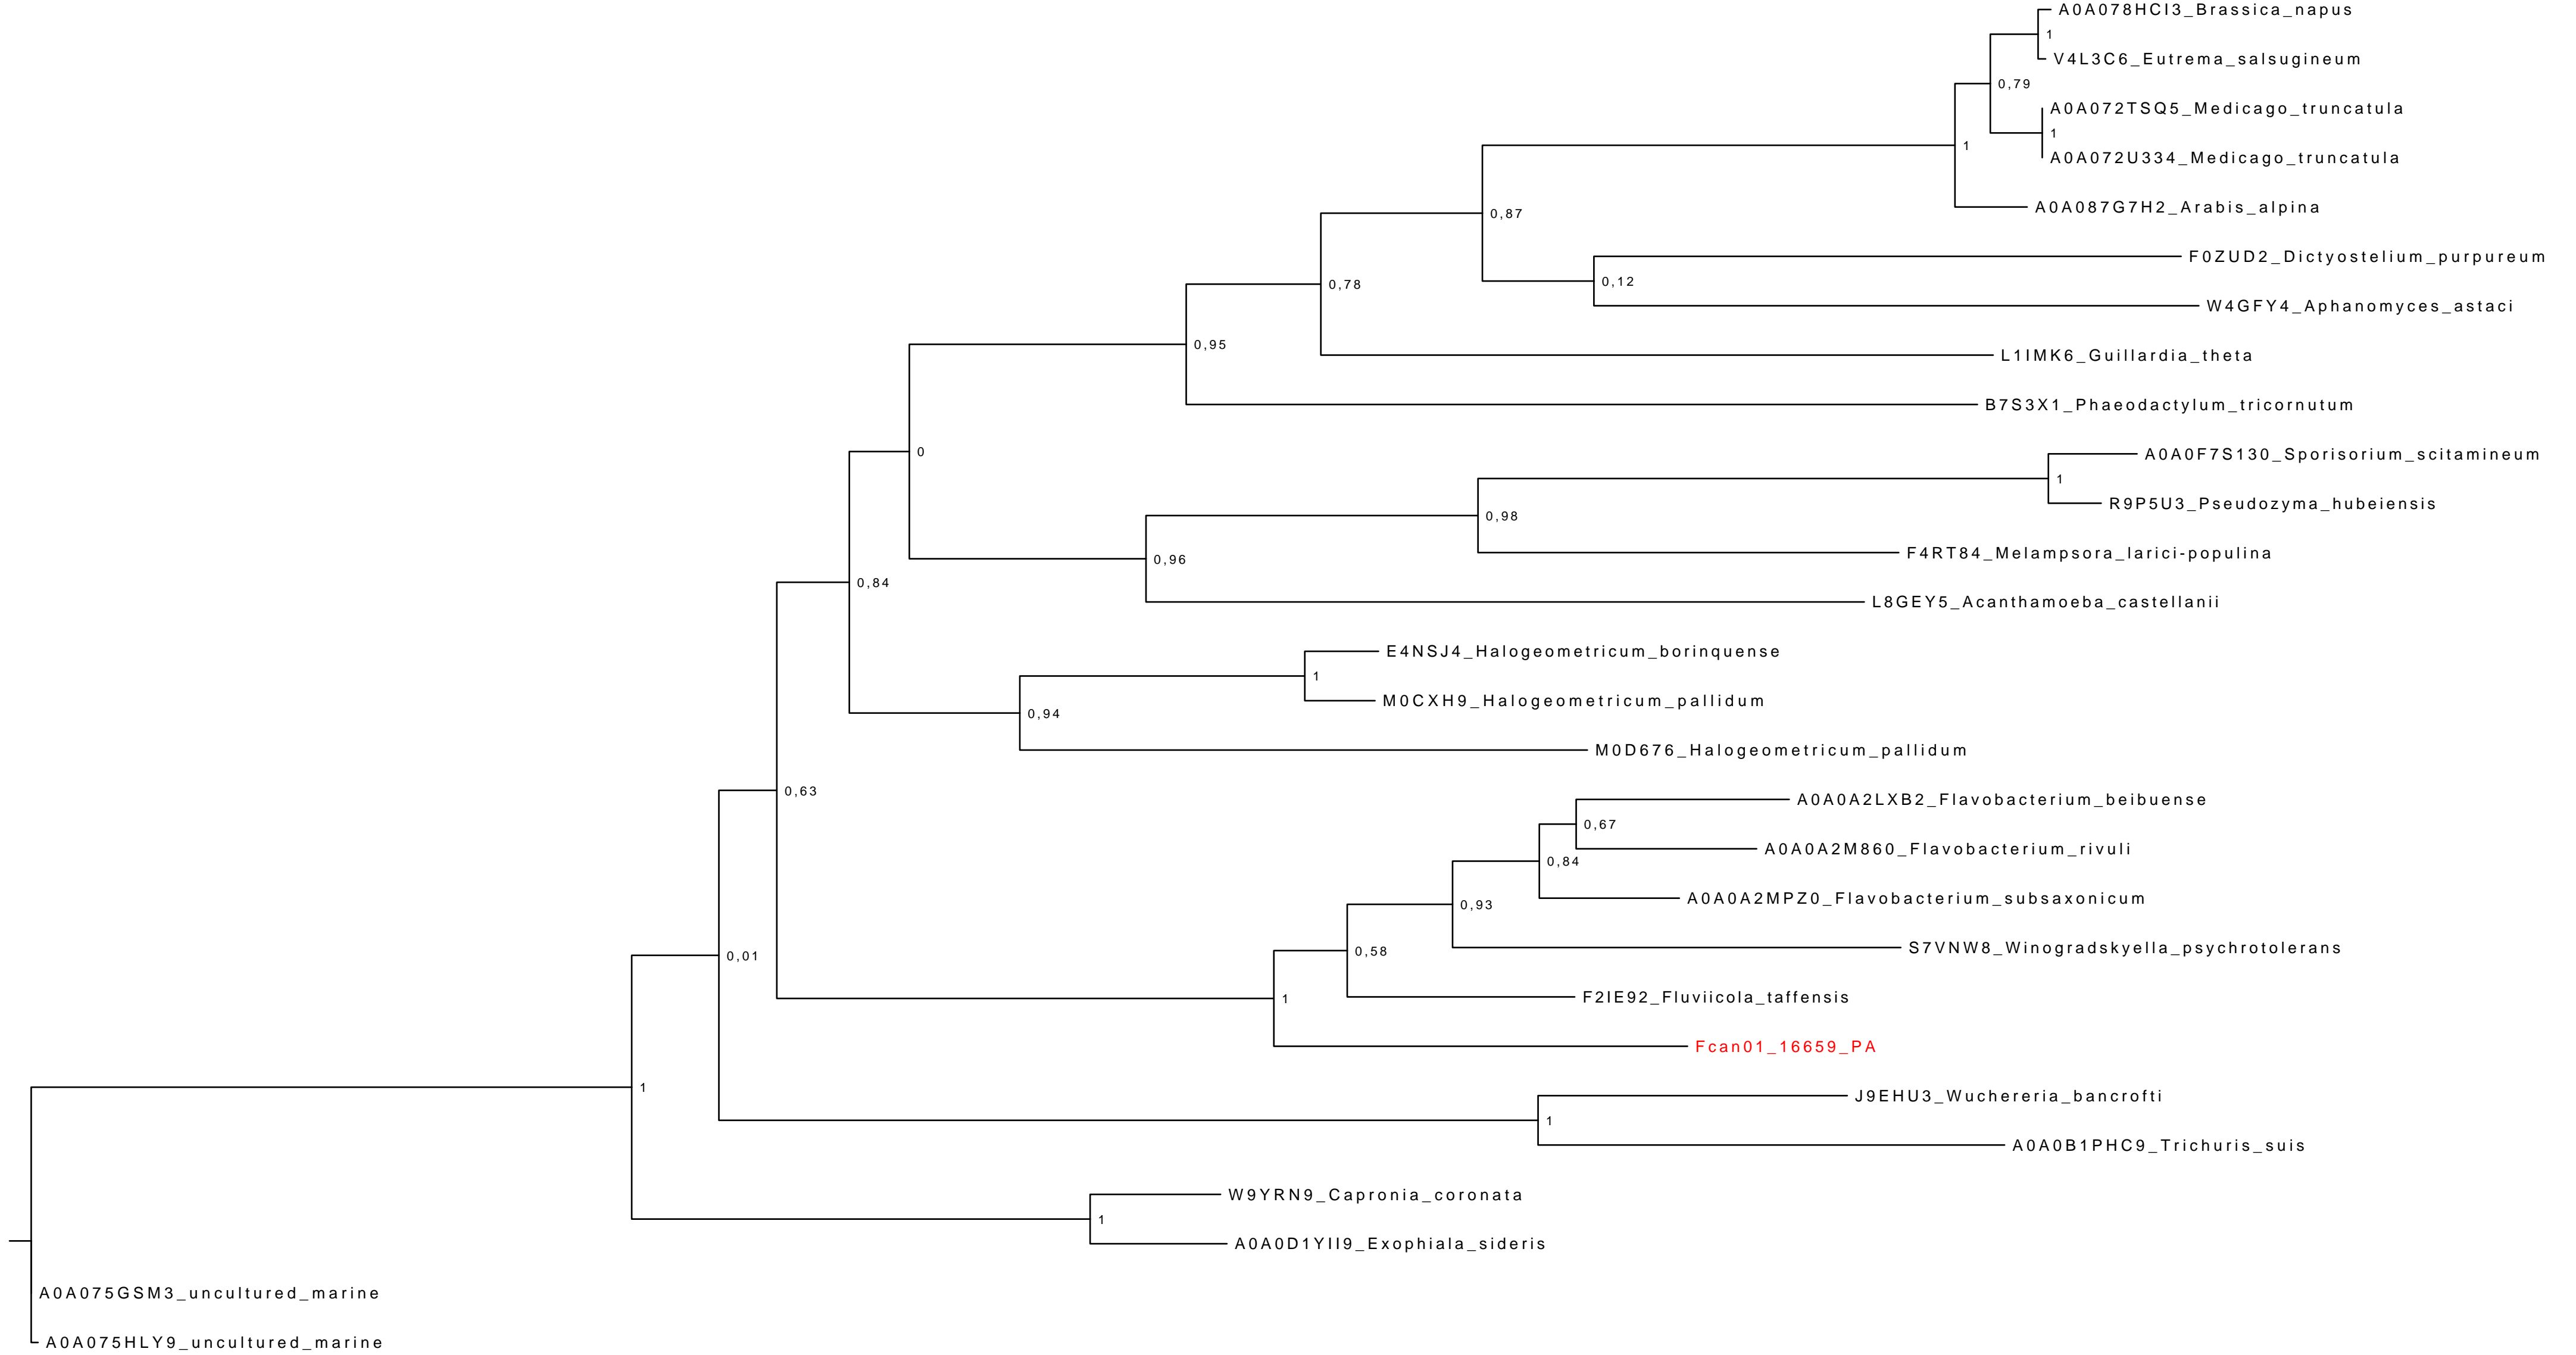

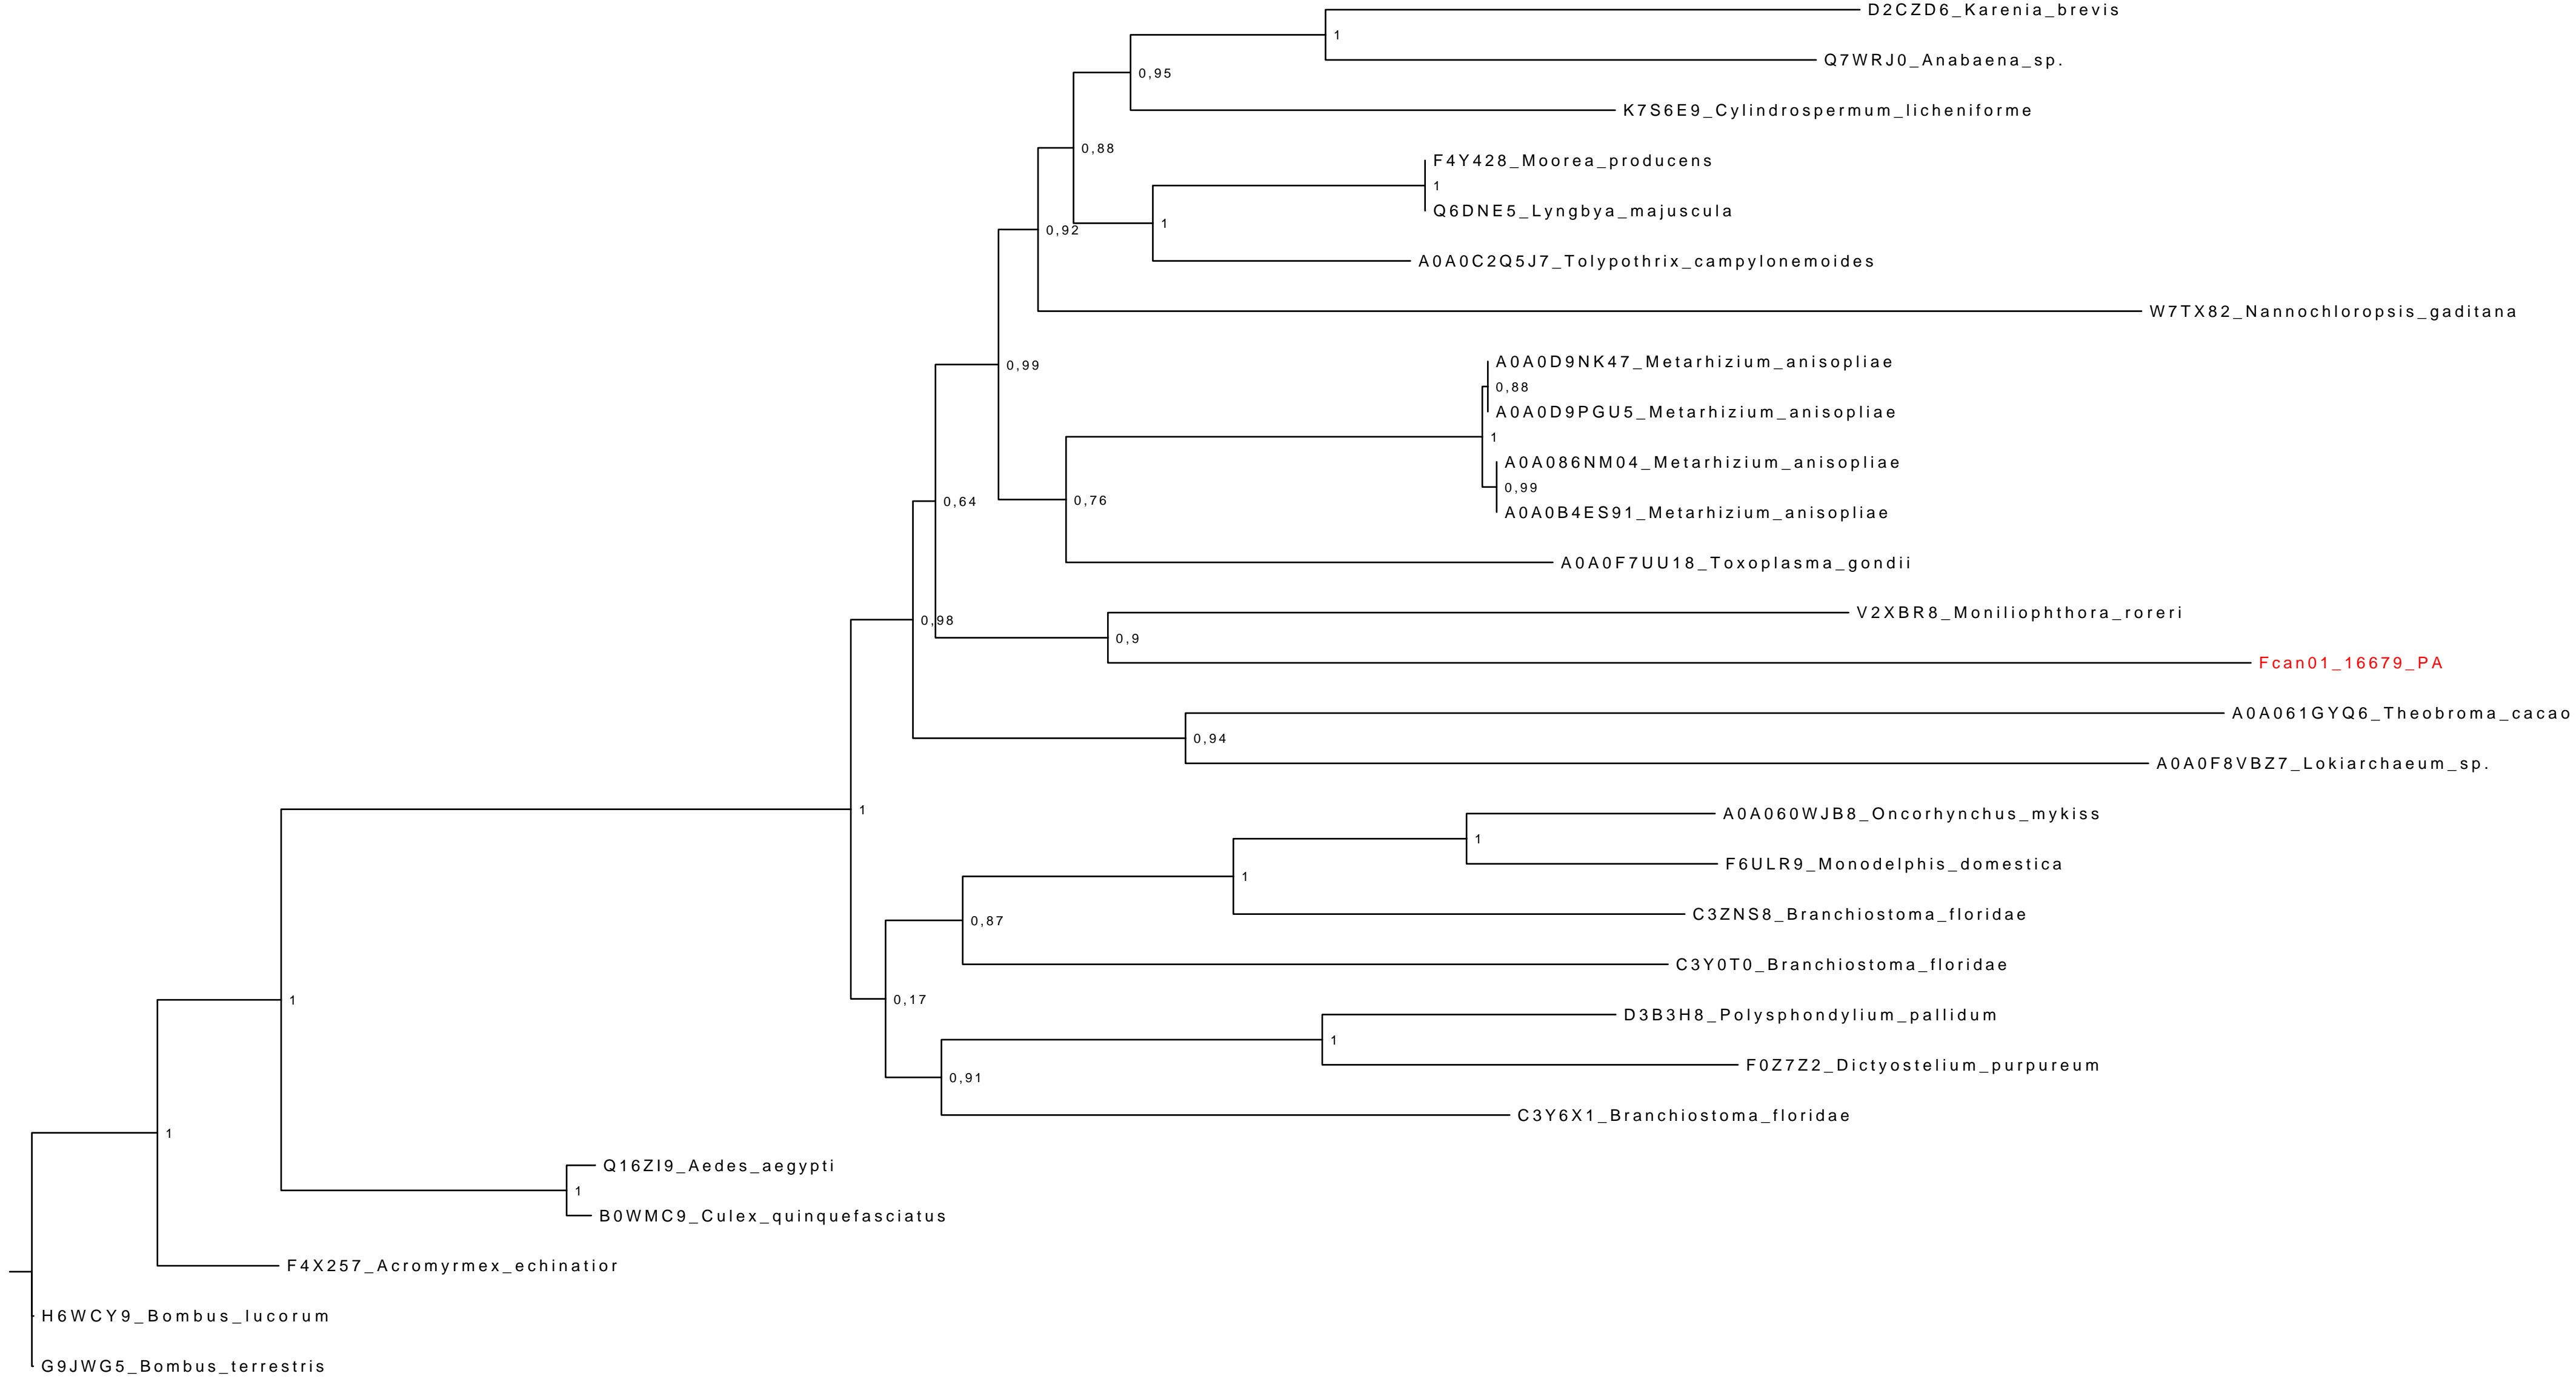



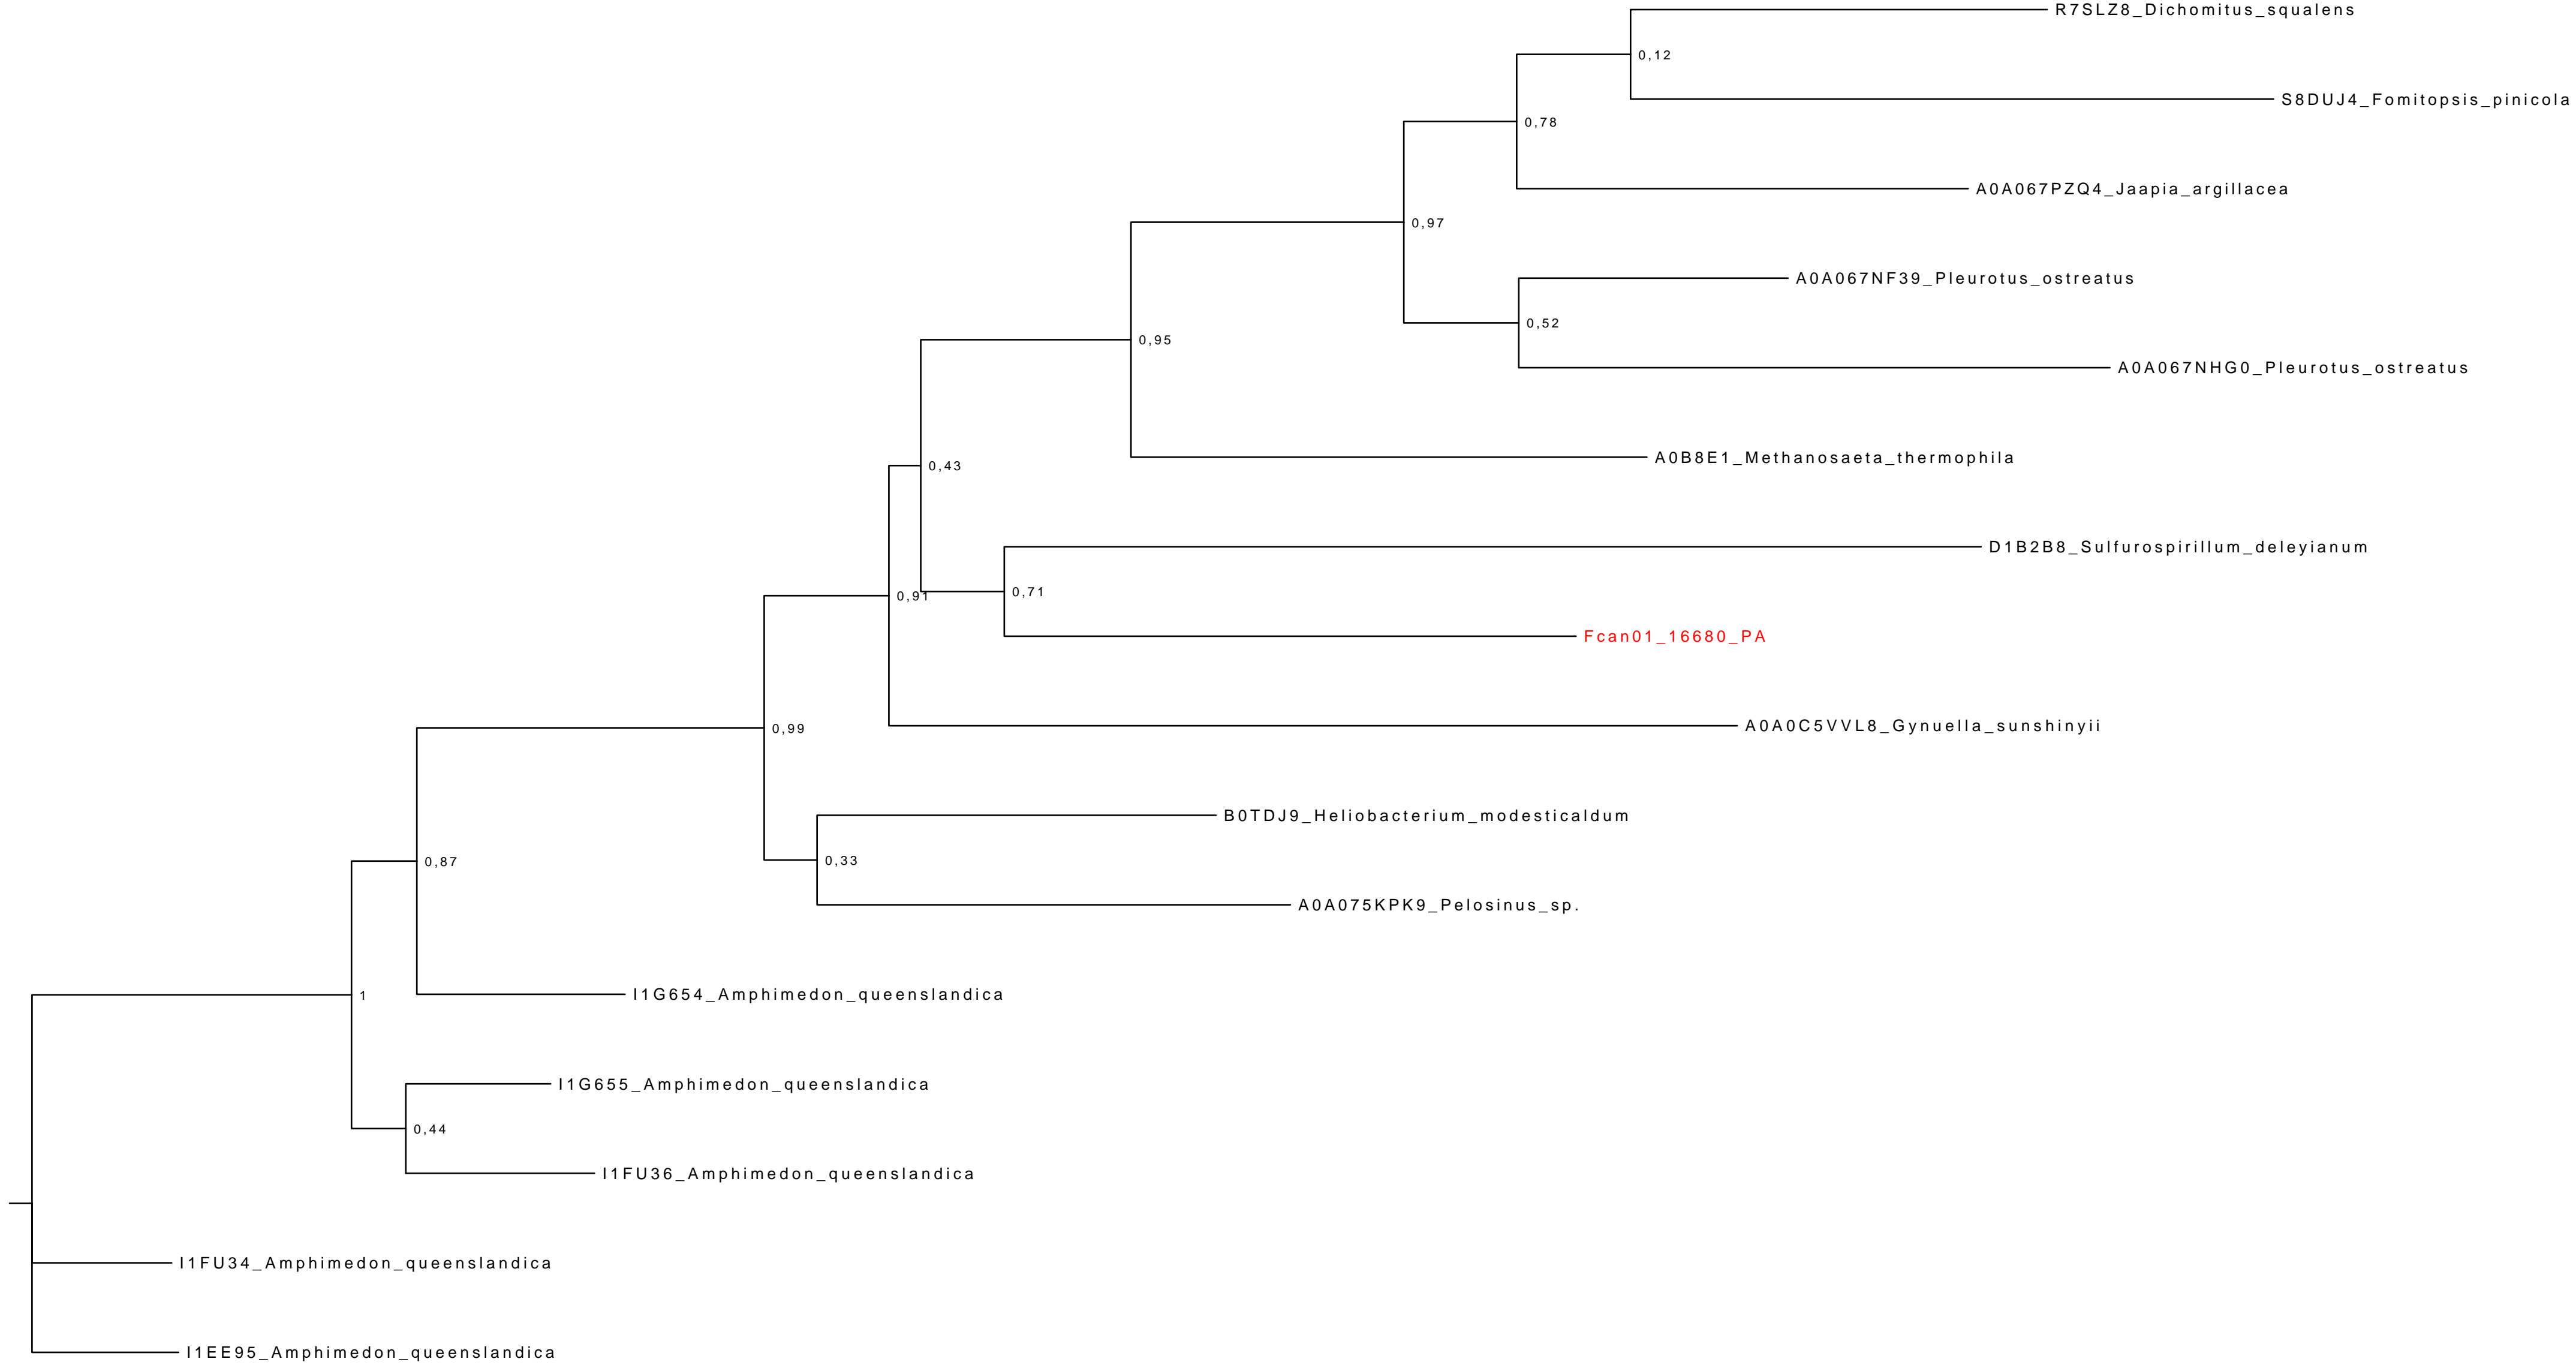

0.4

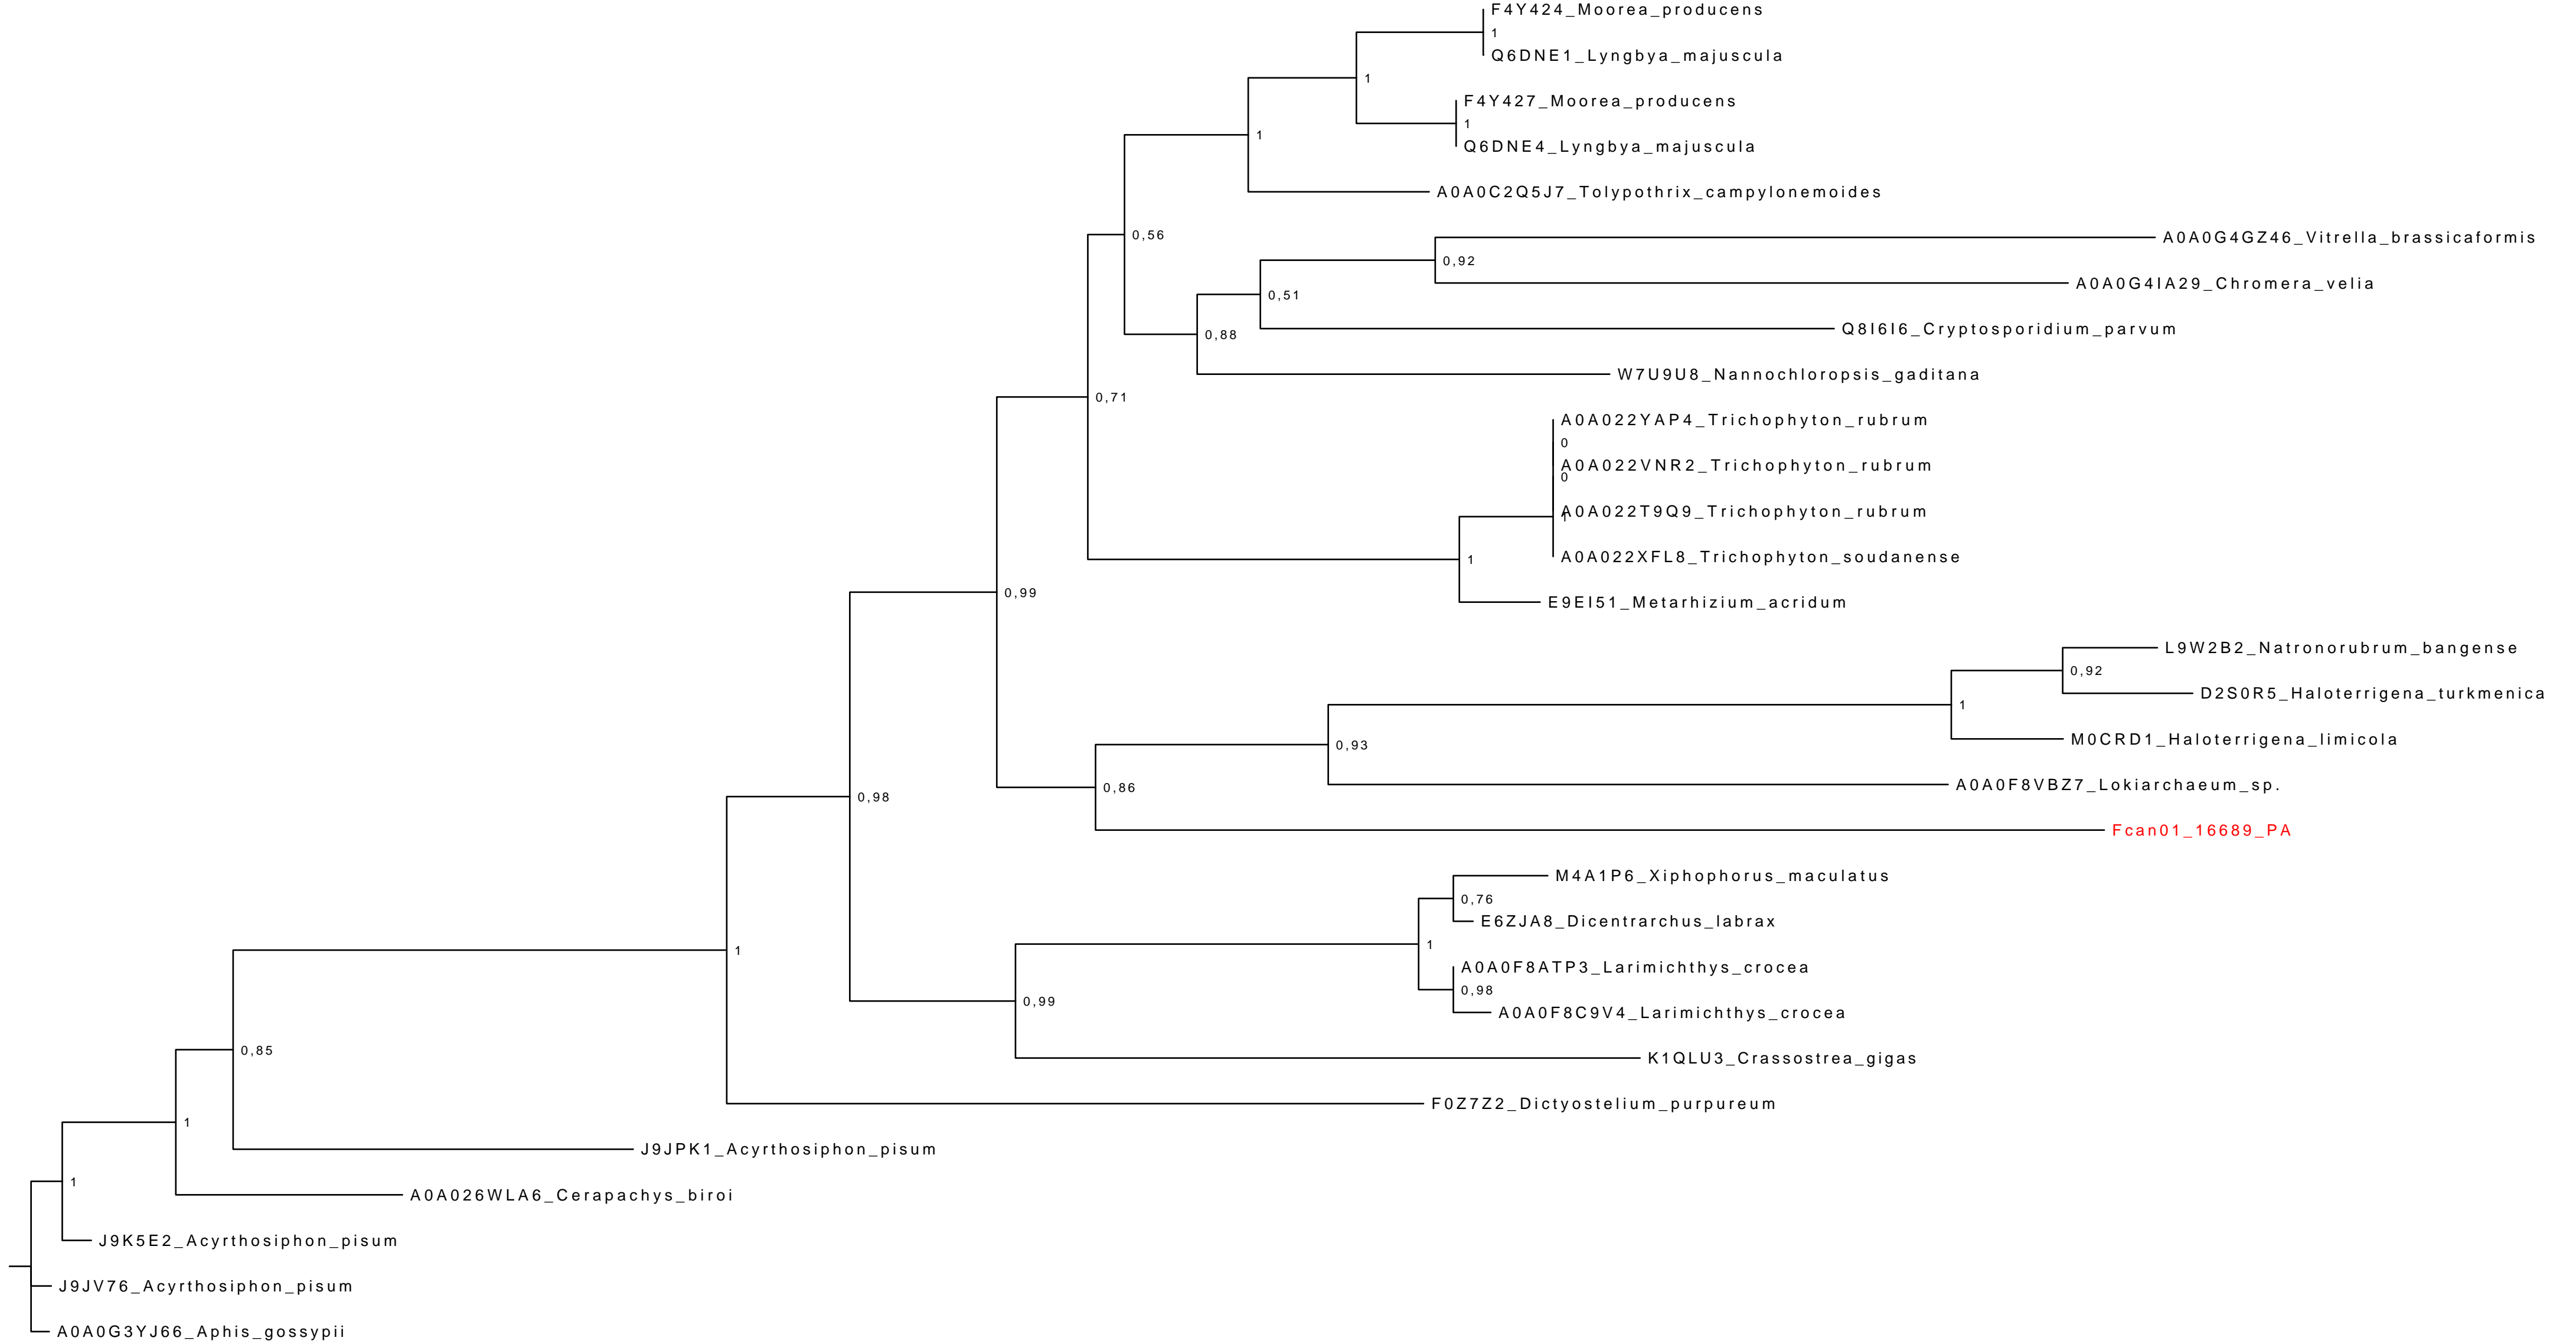

0.5

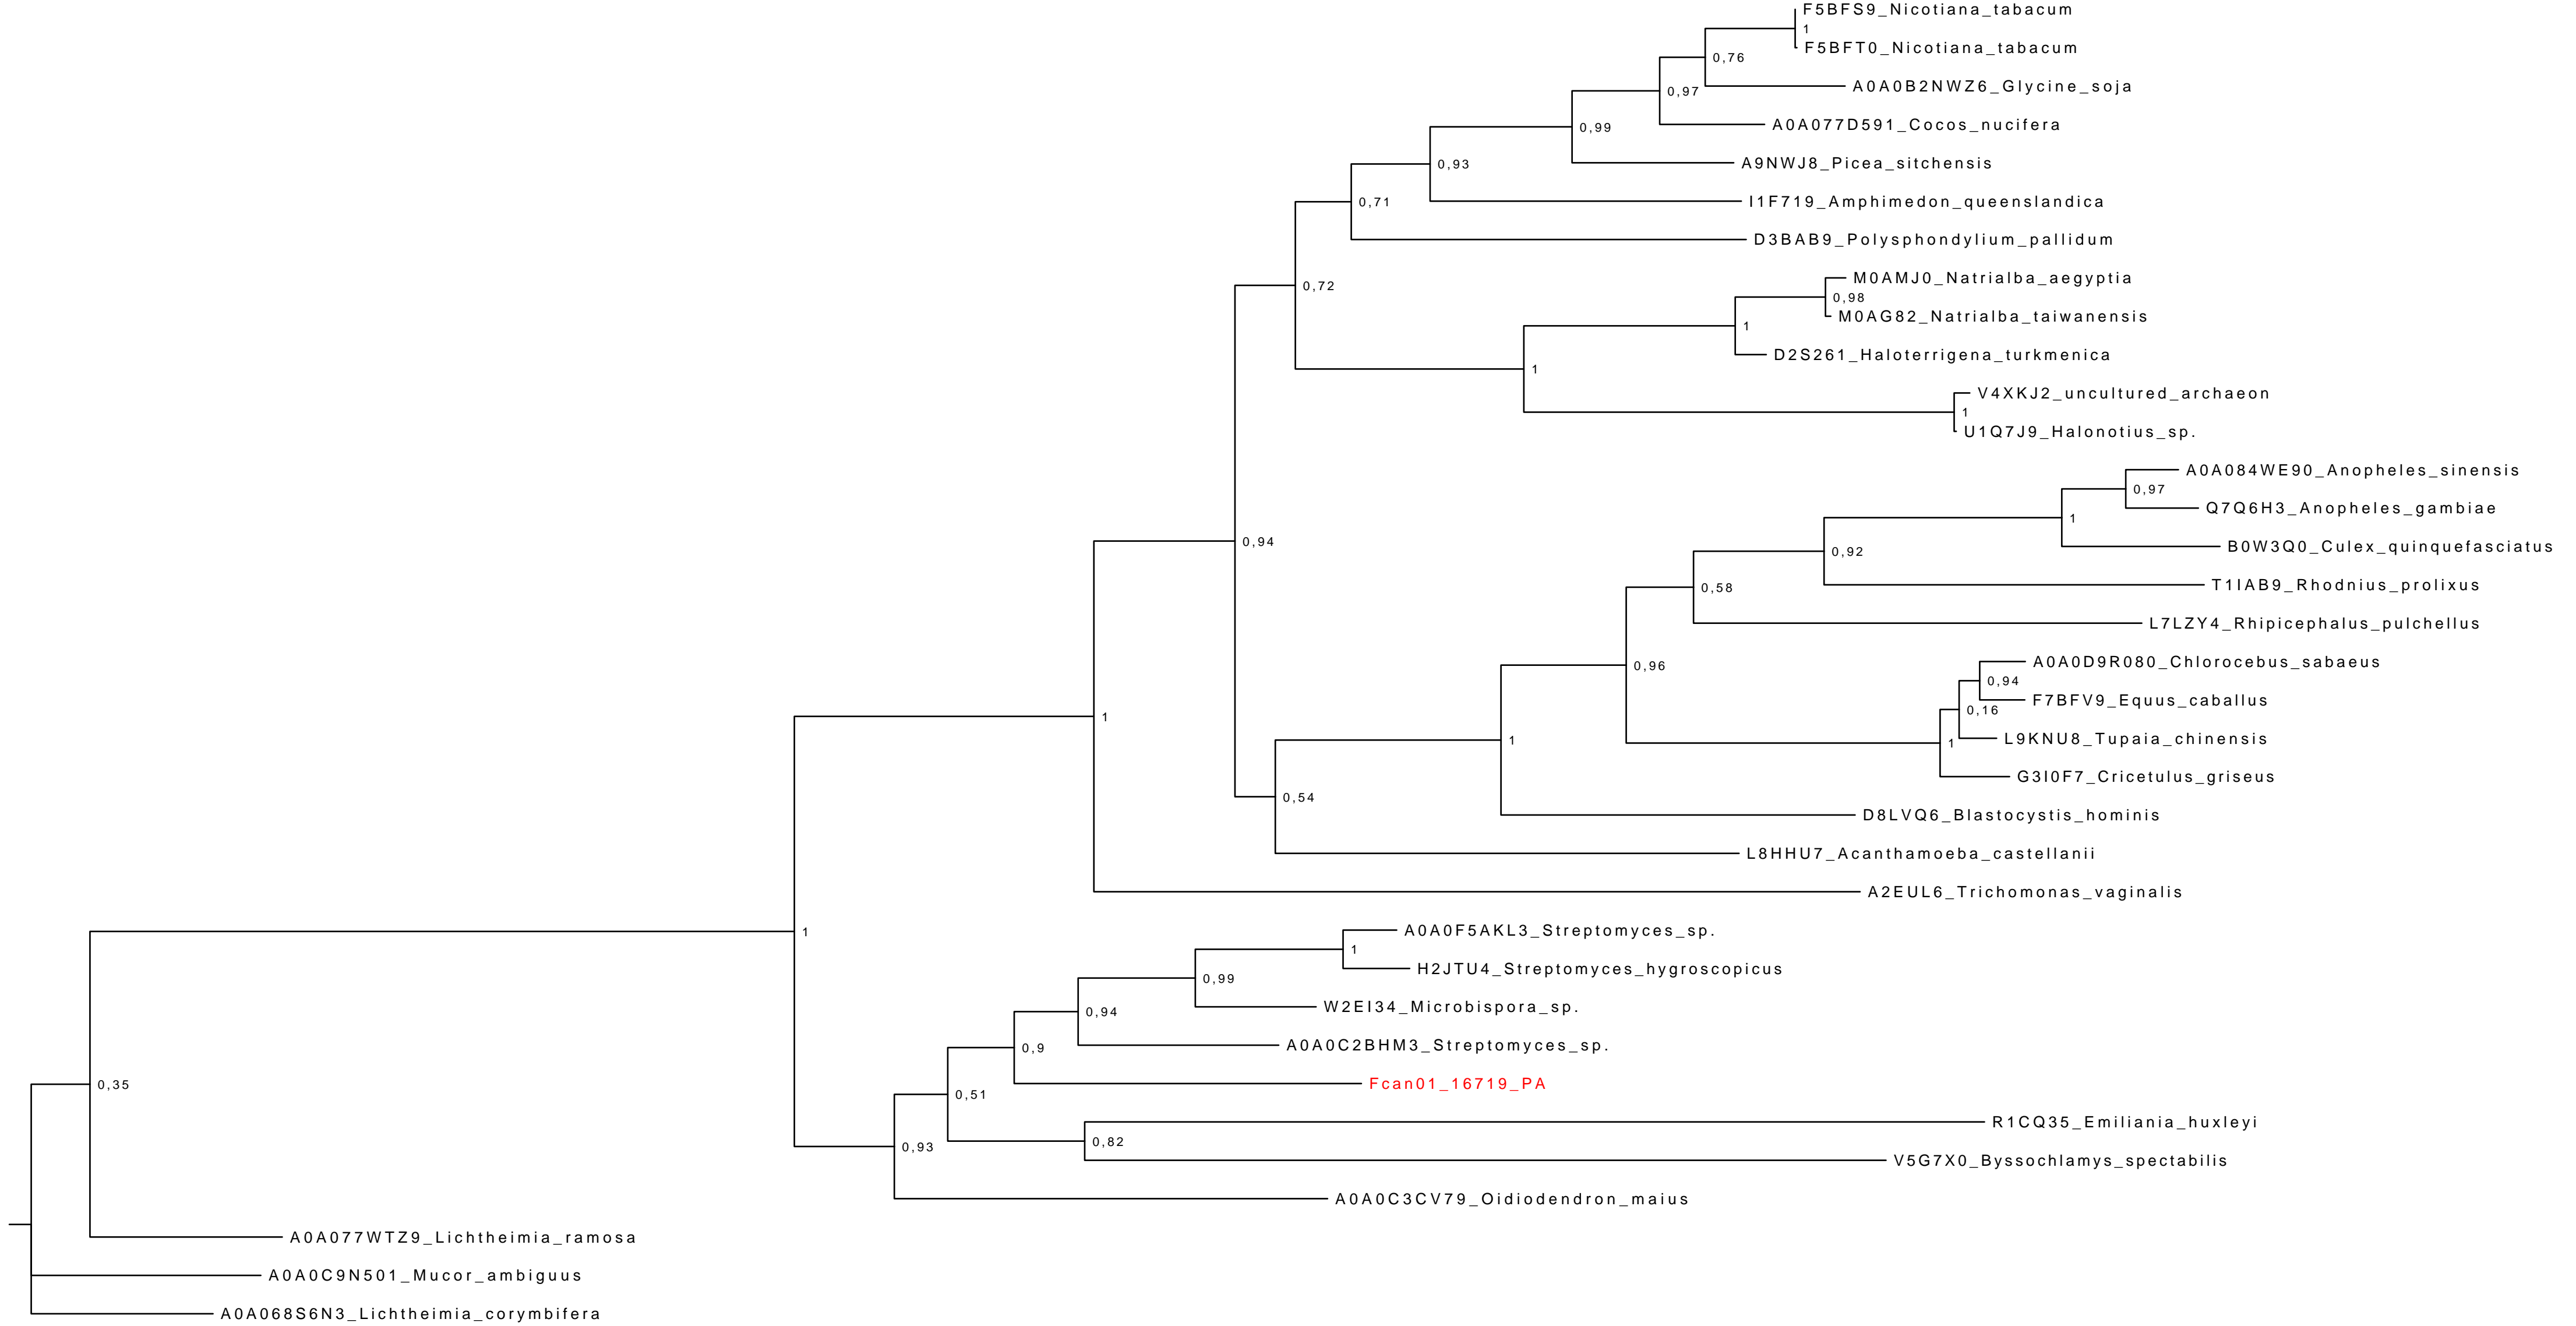

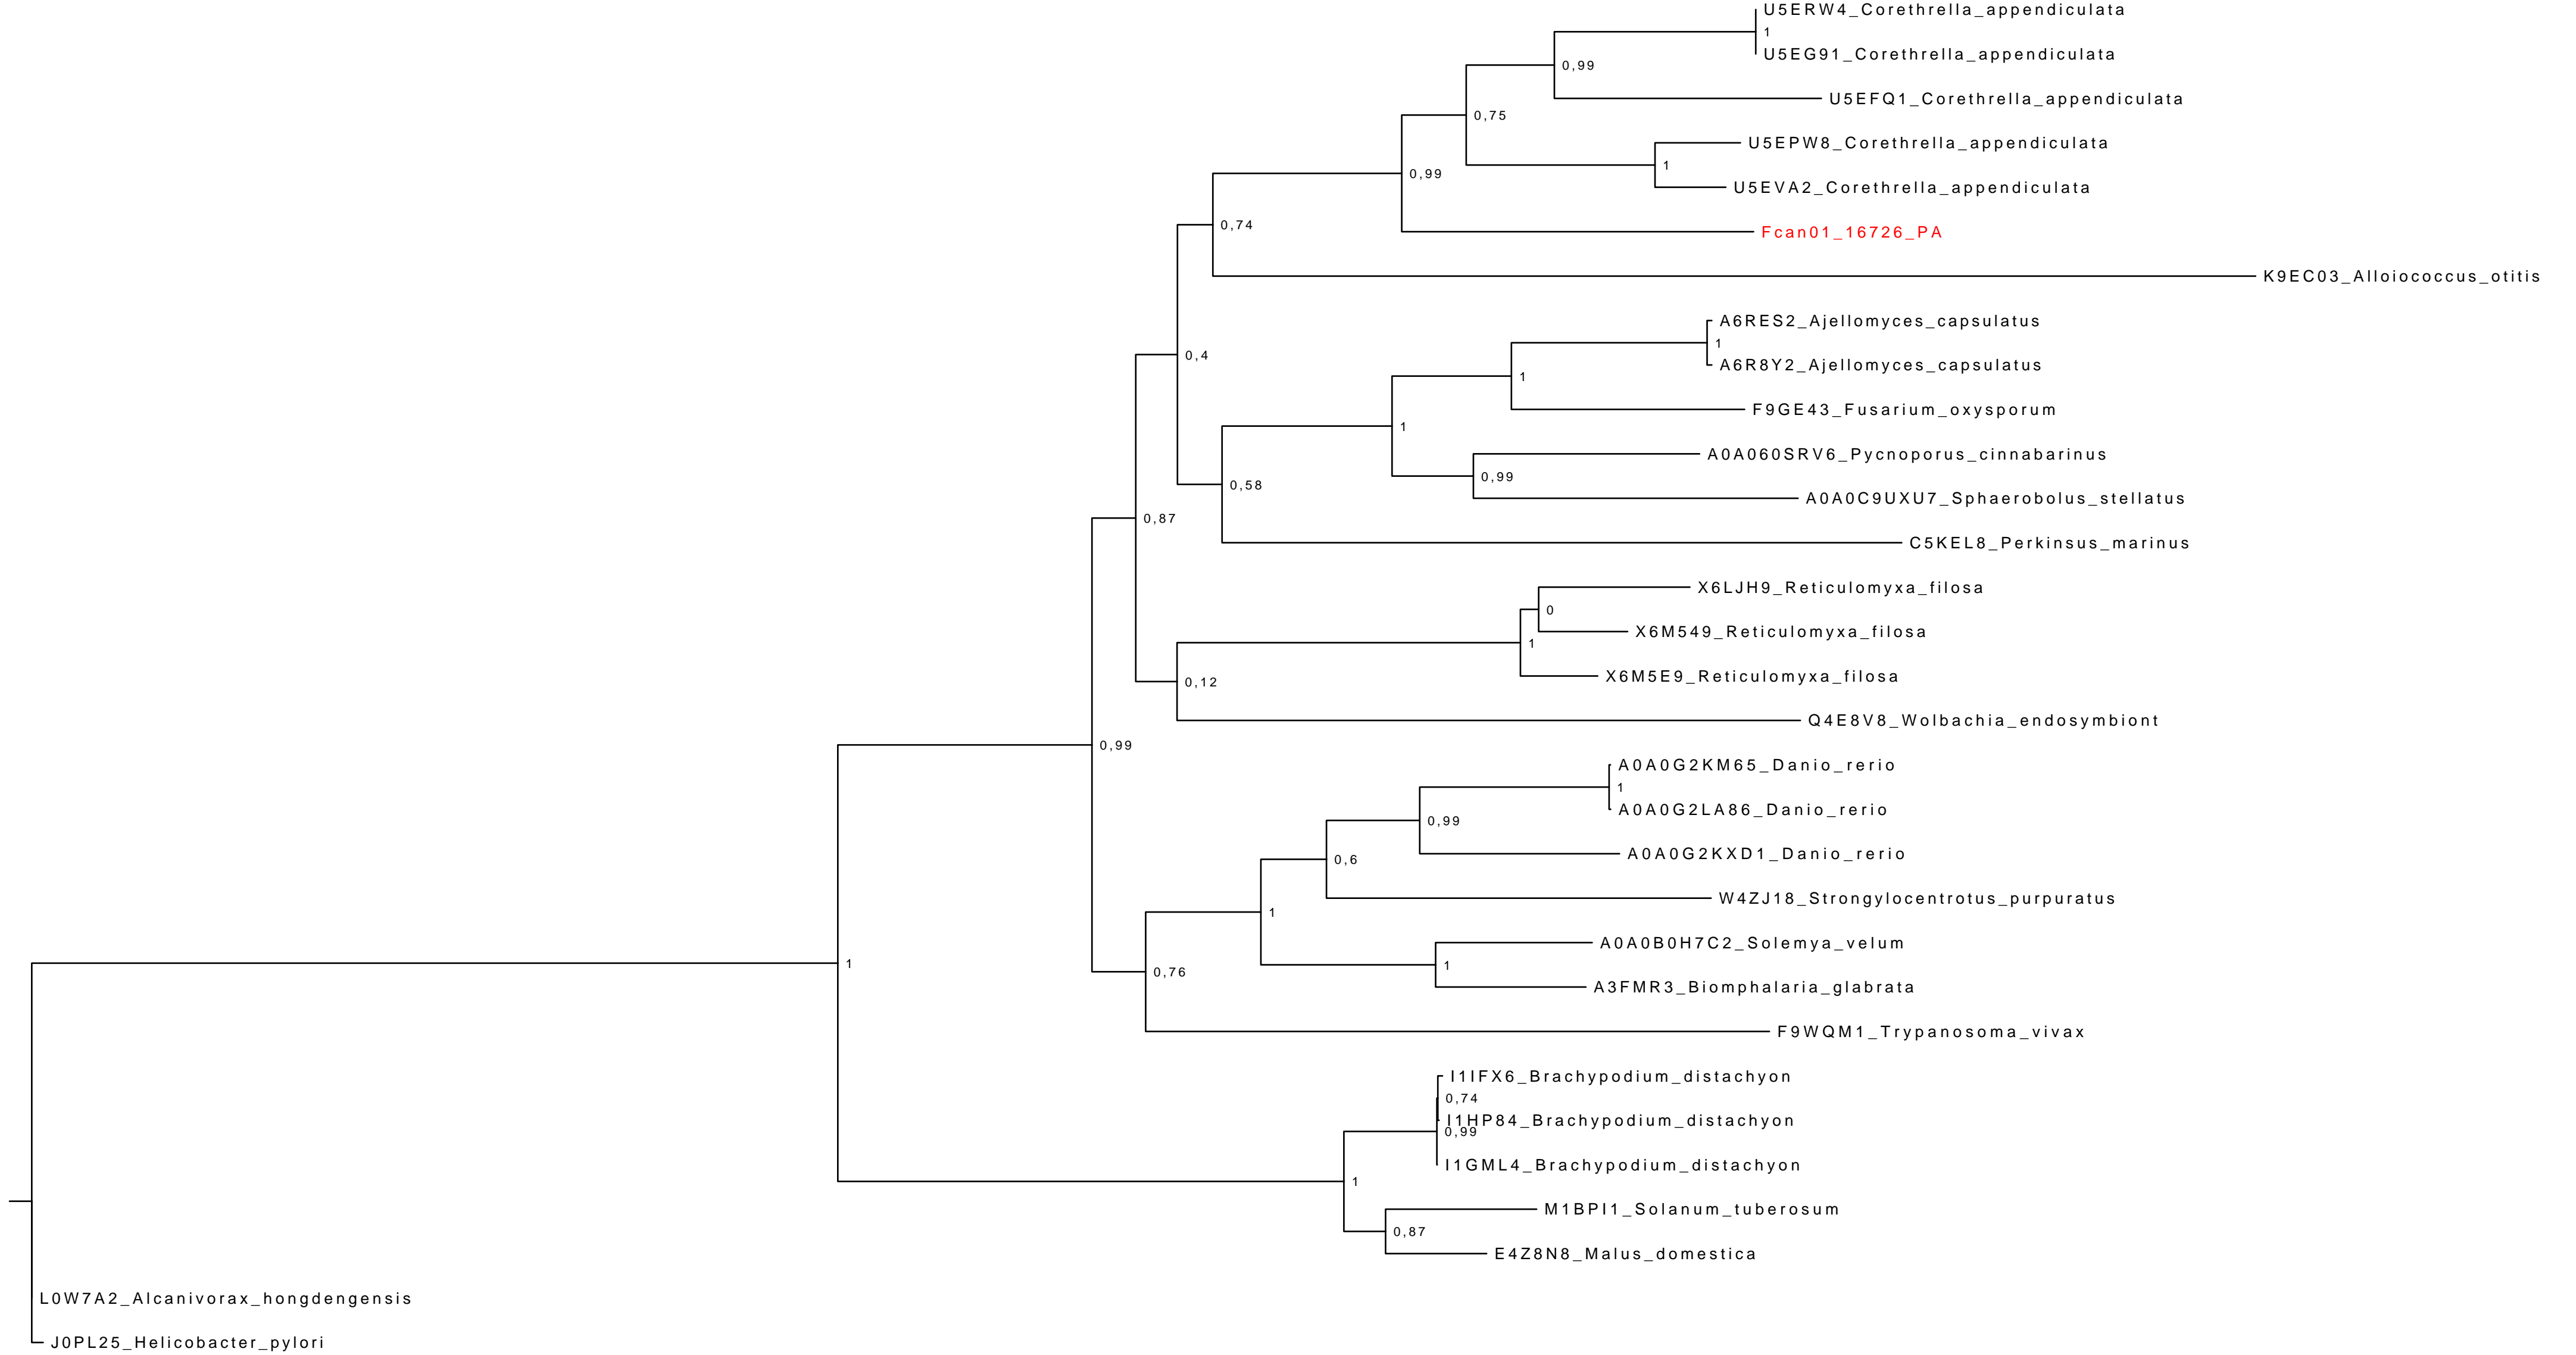

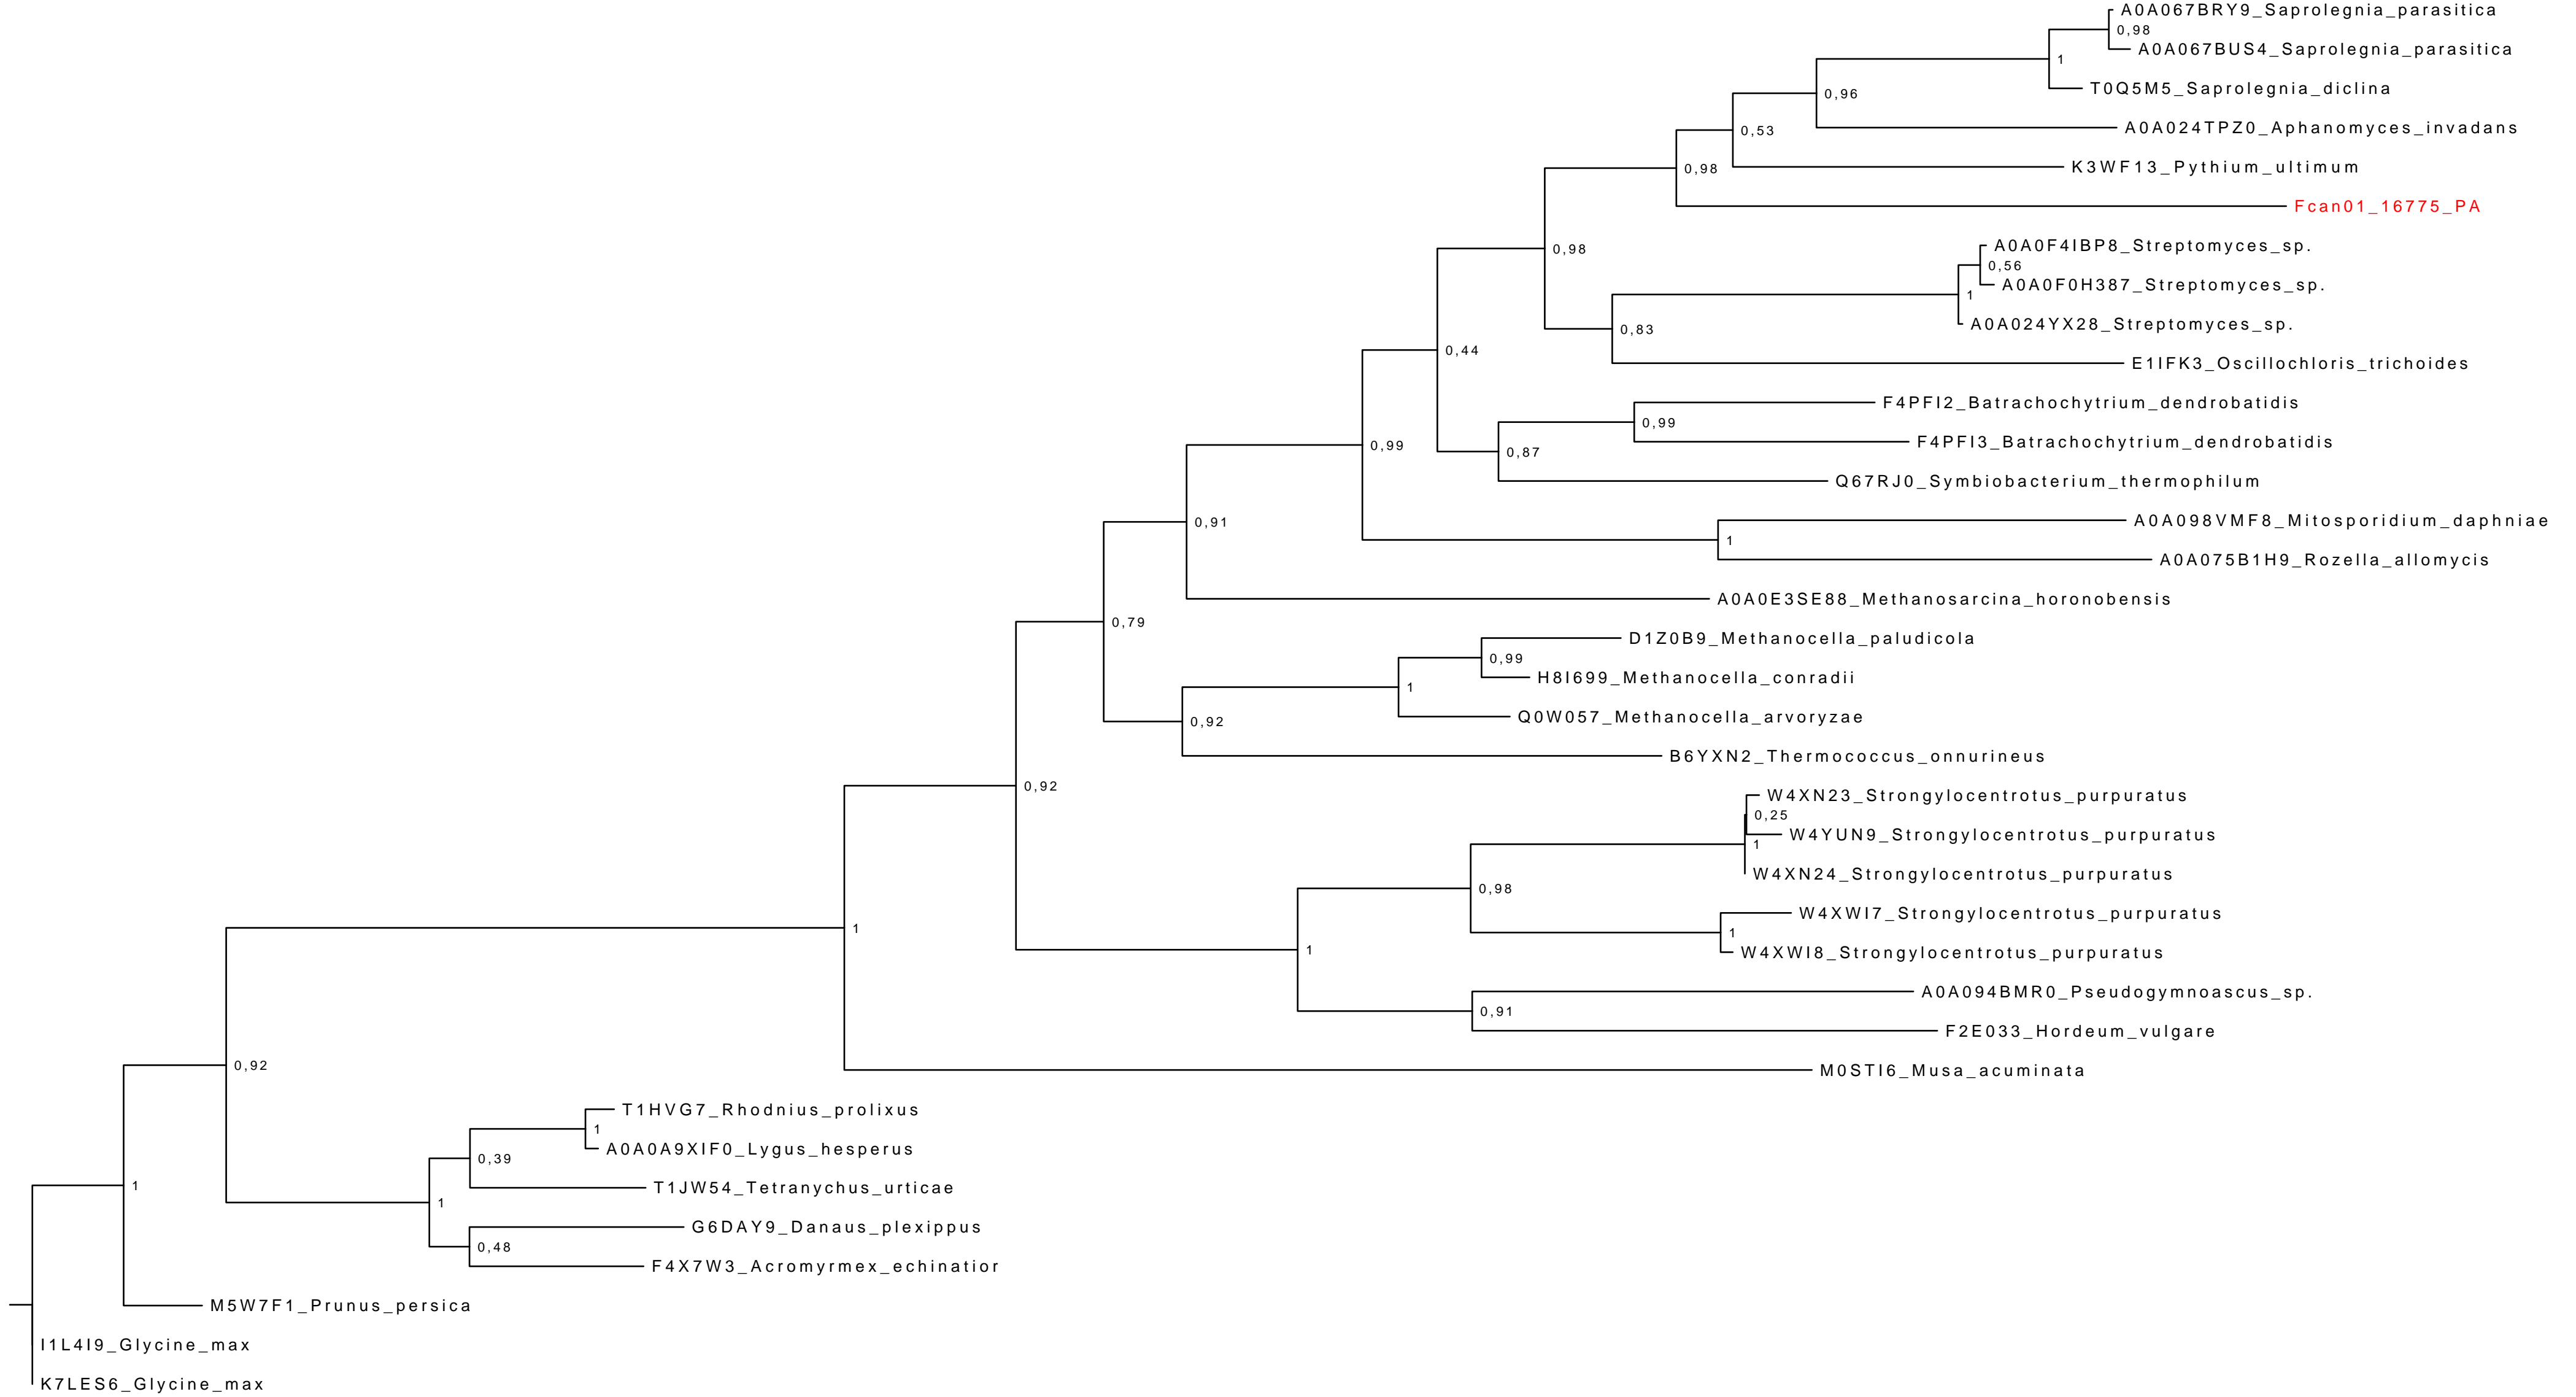

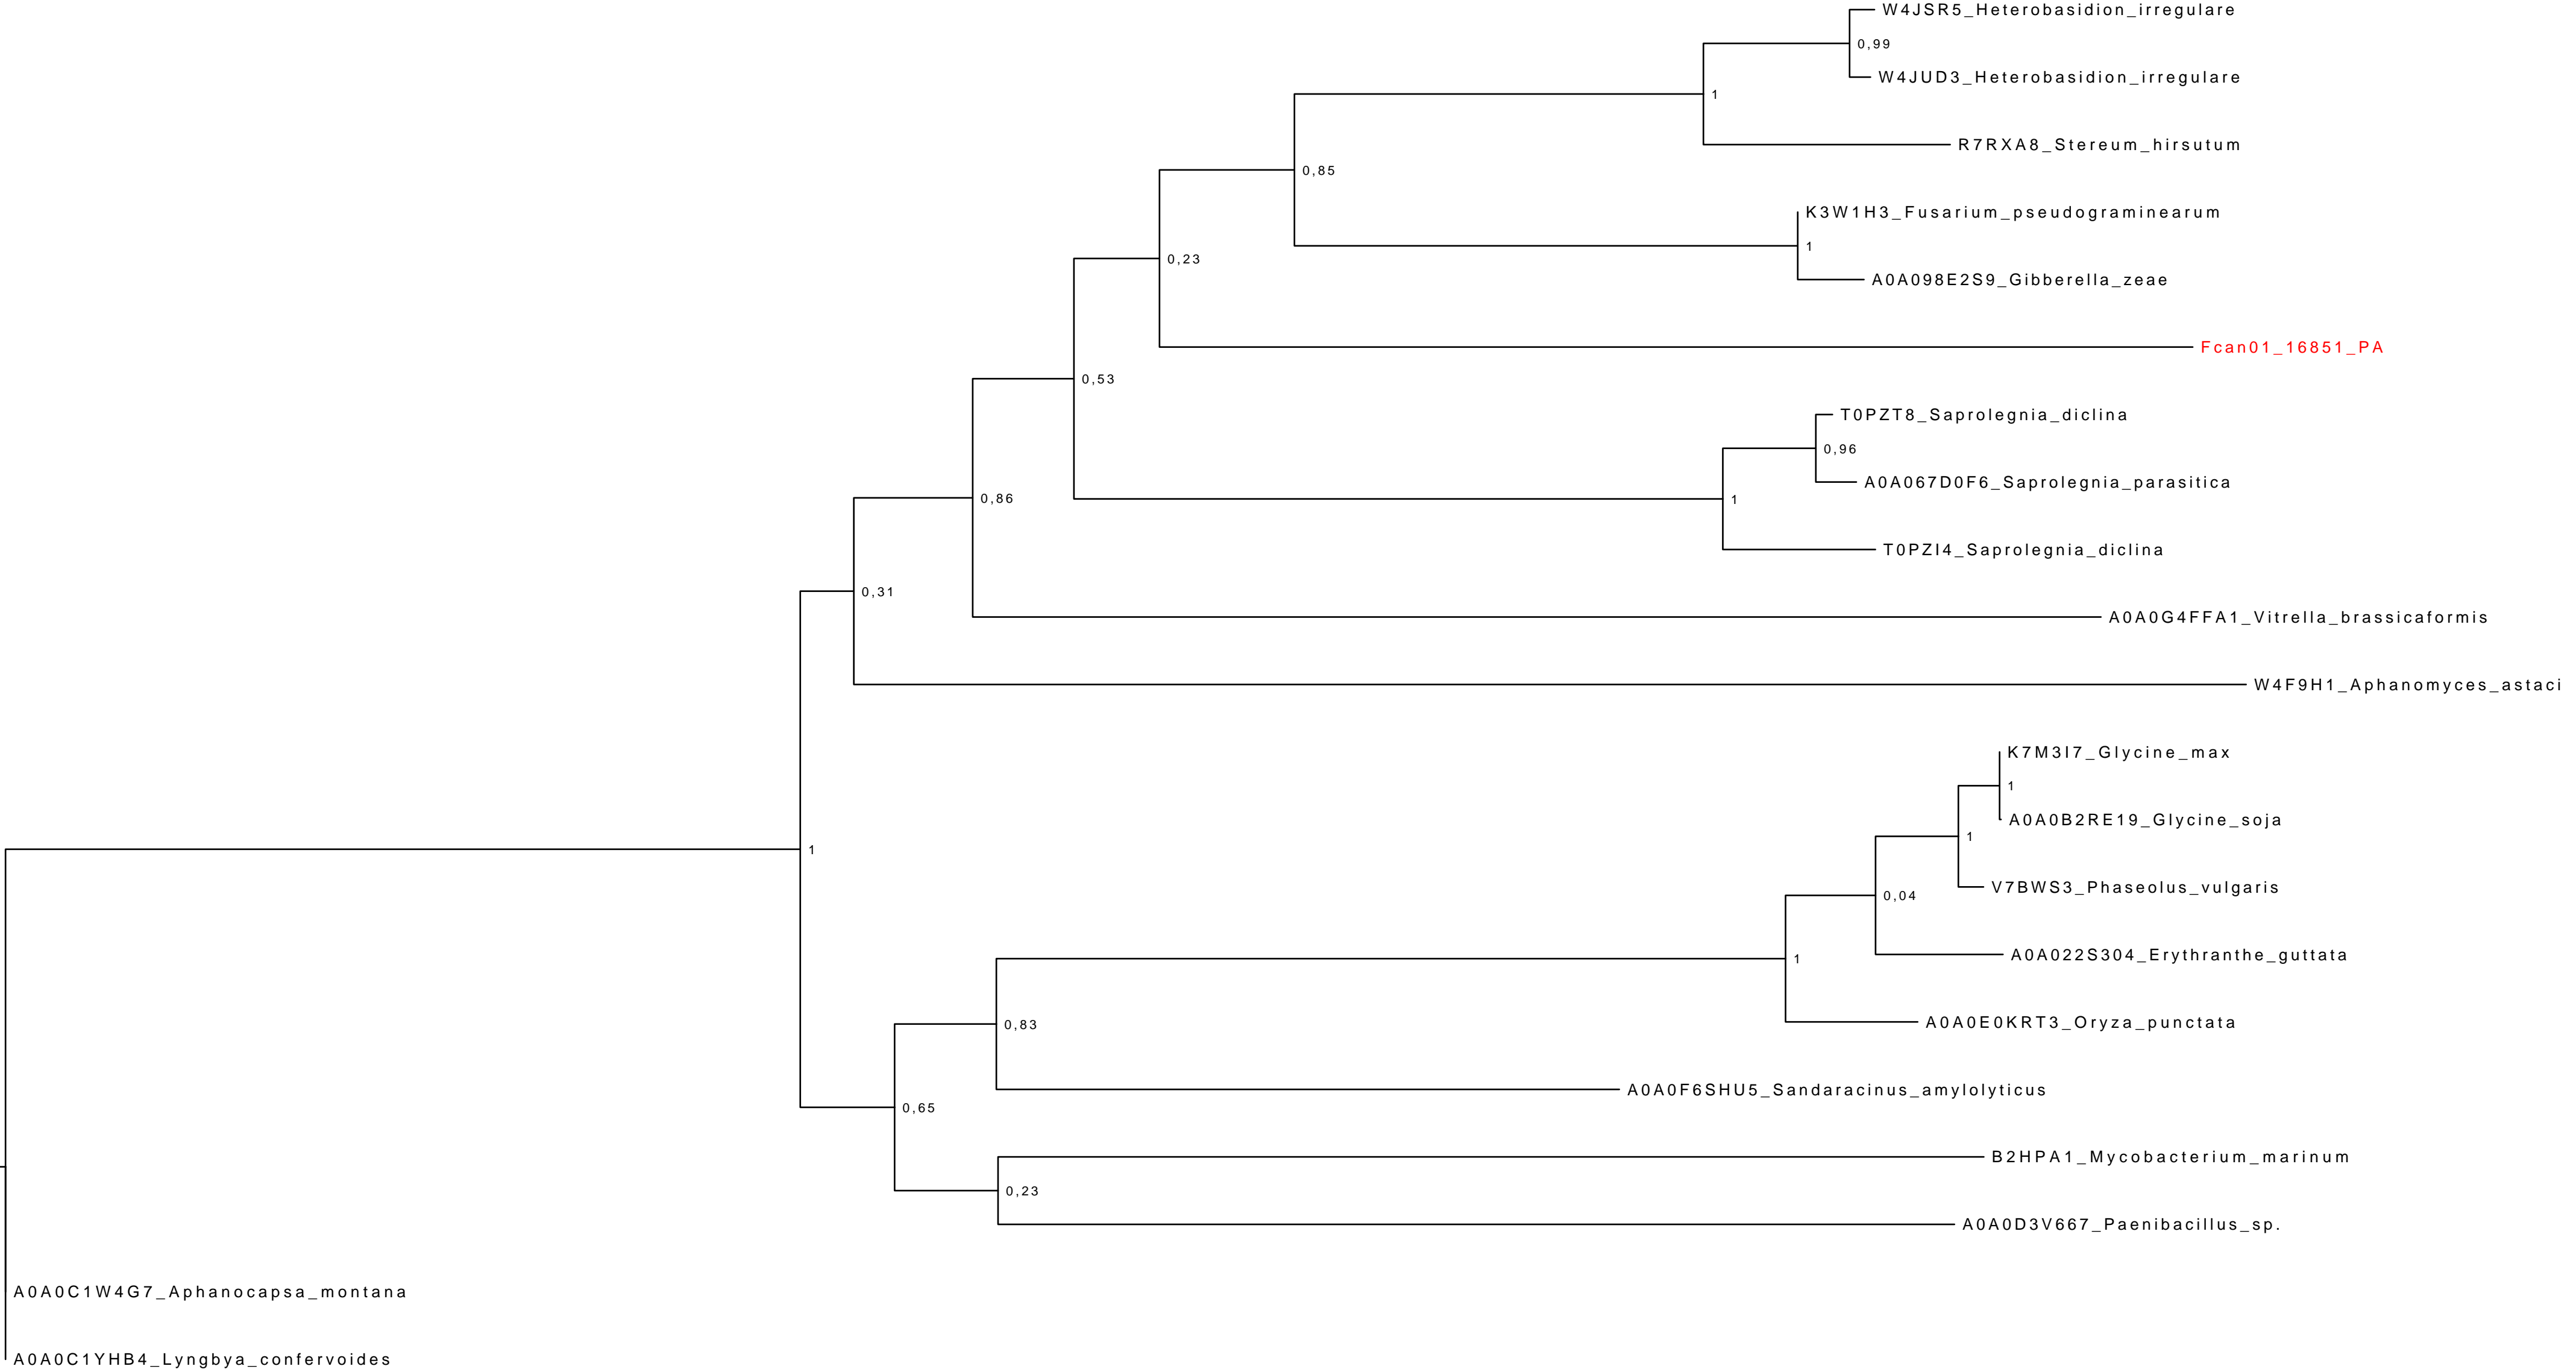

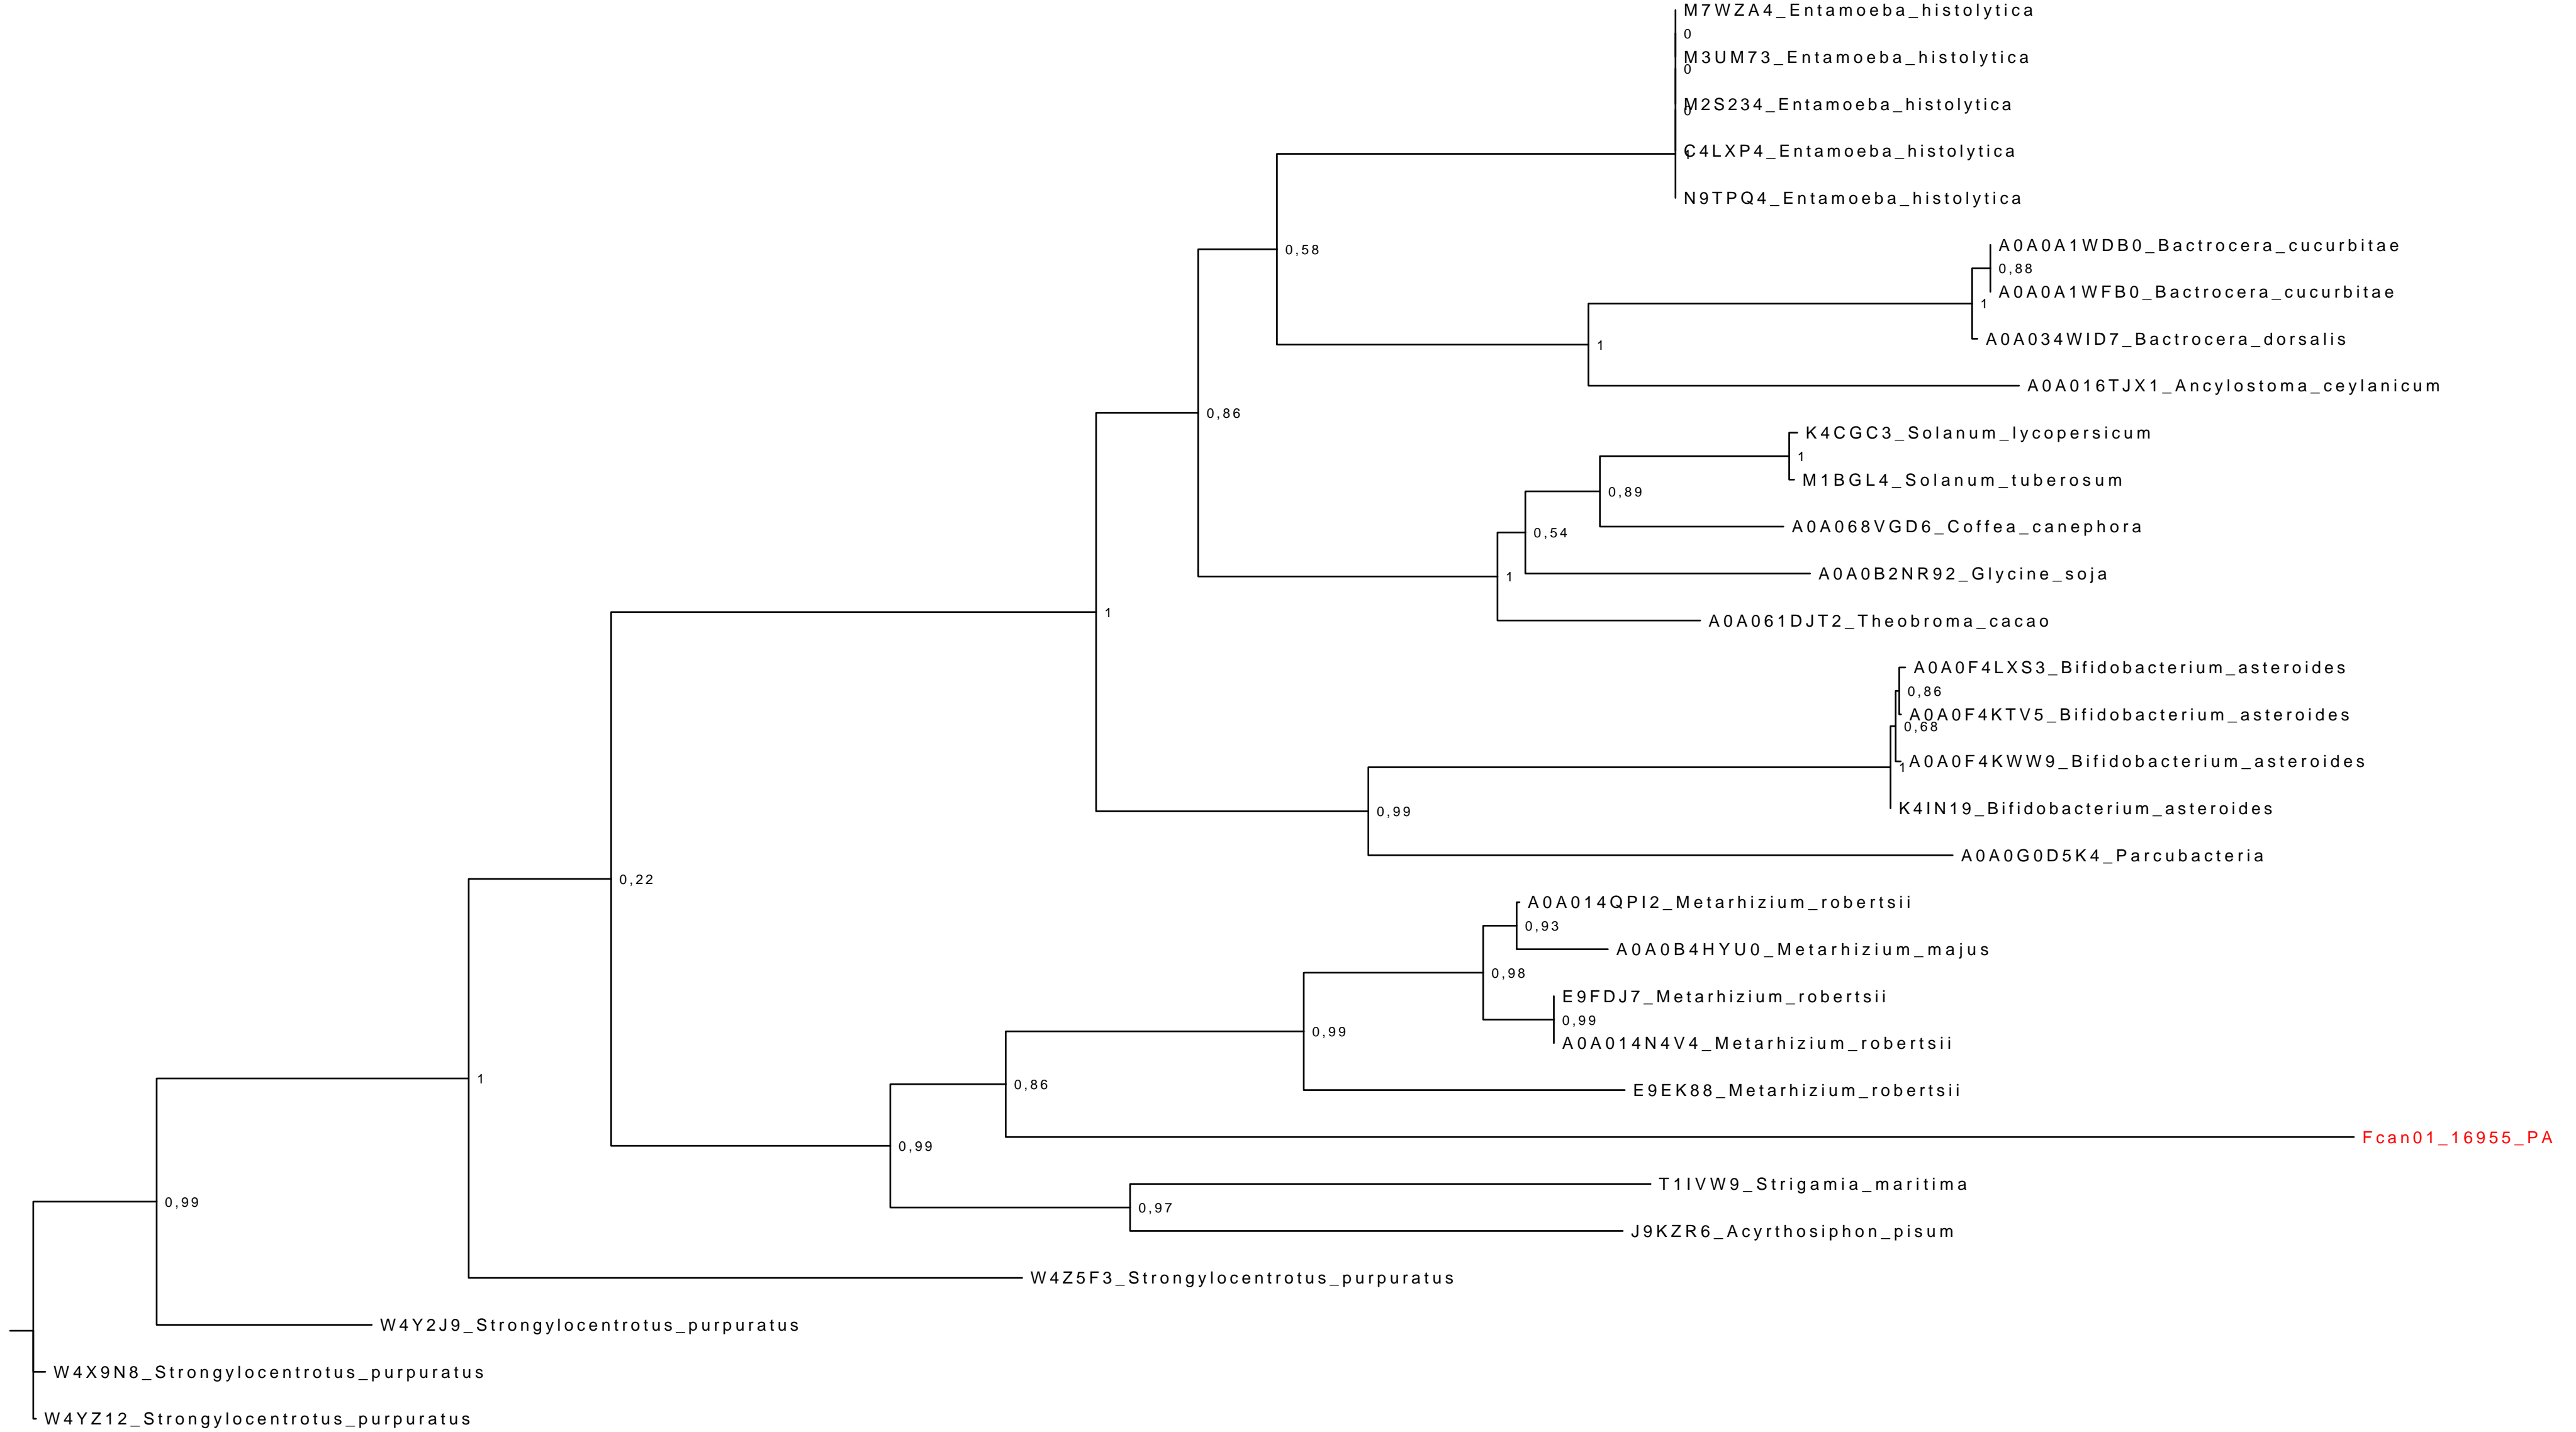

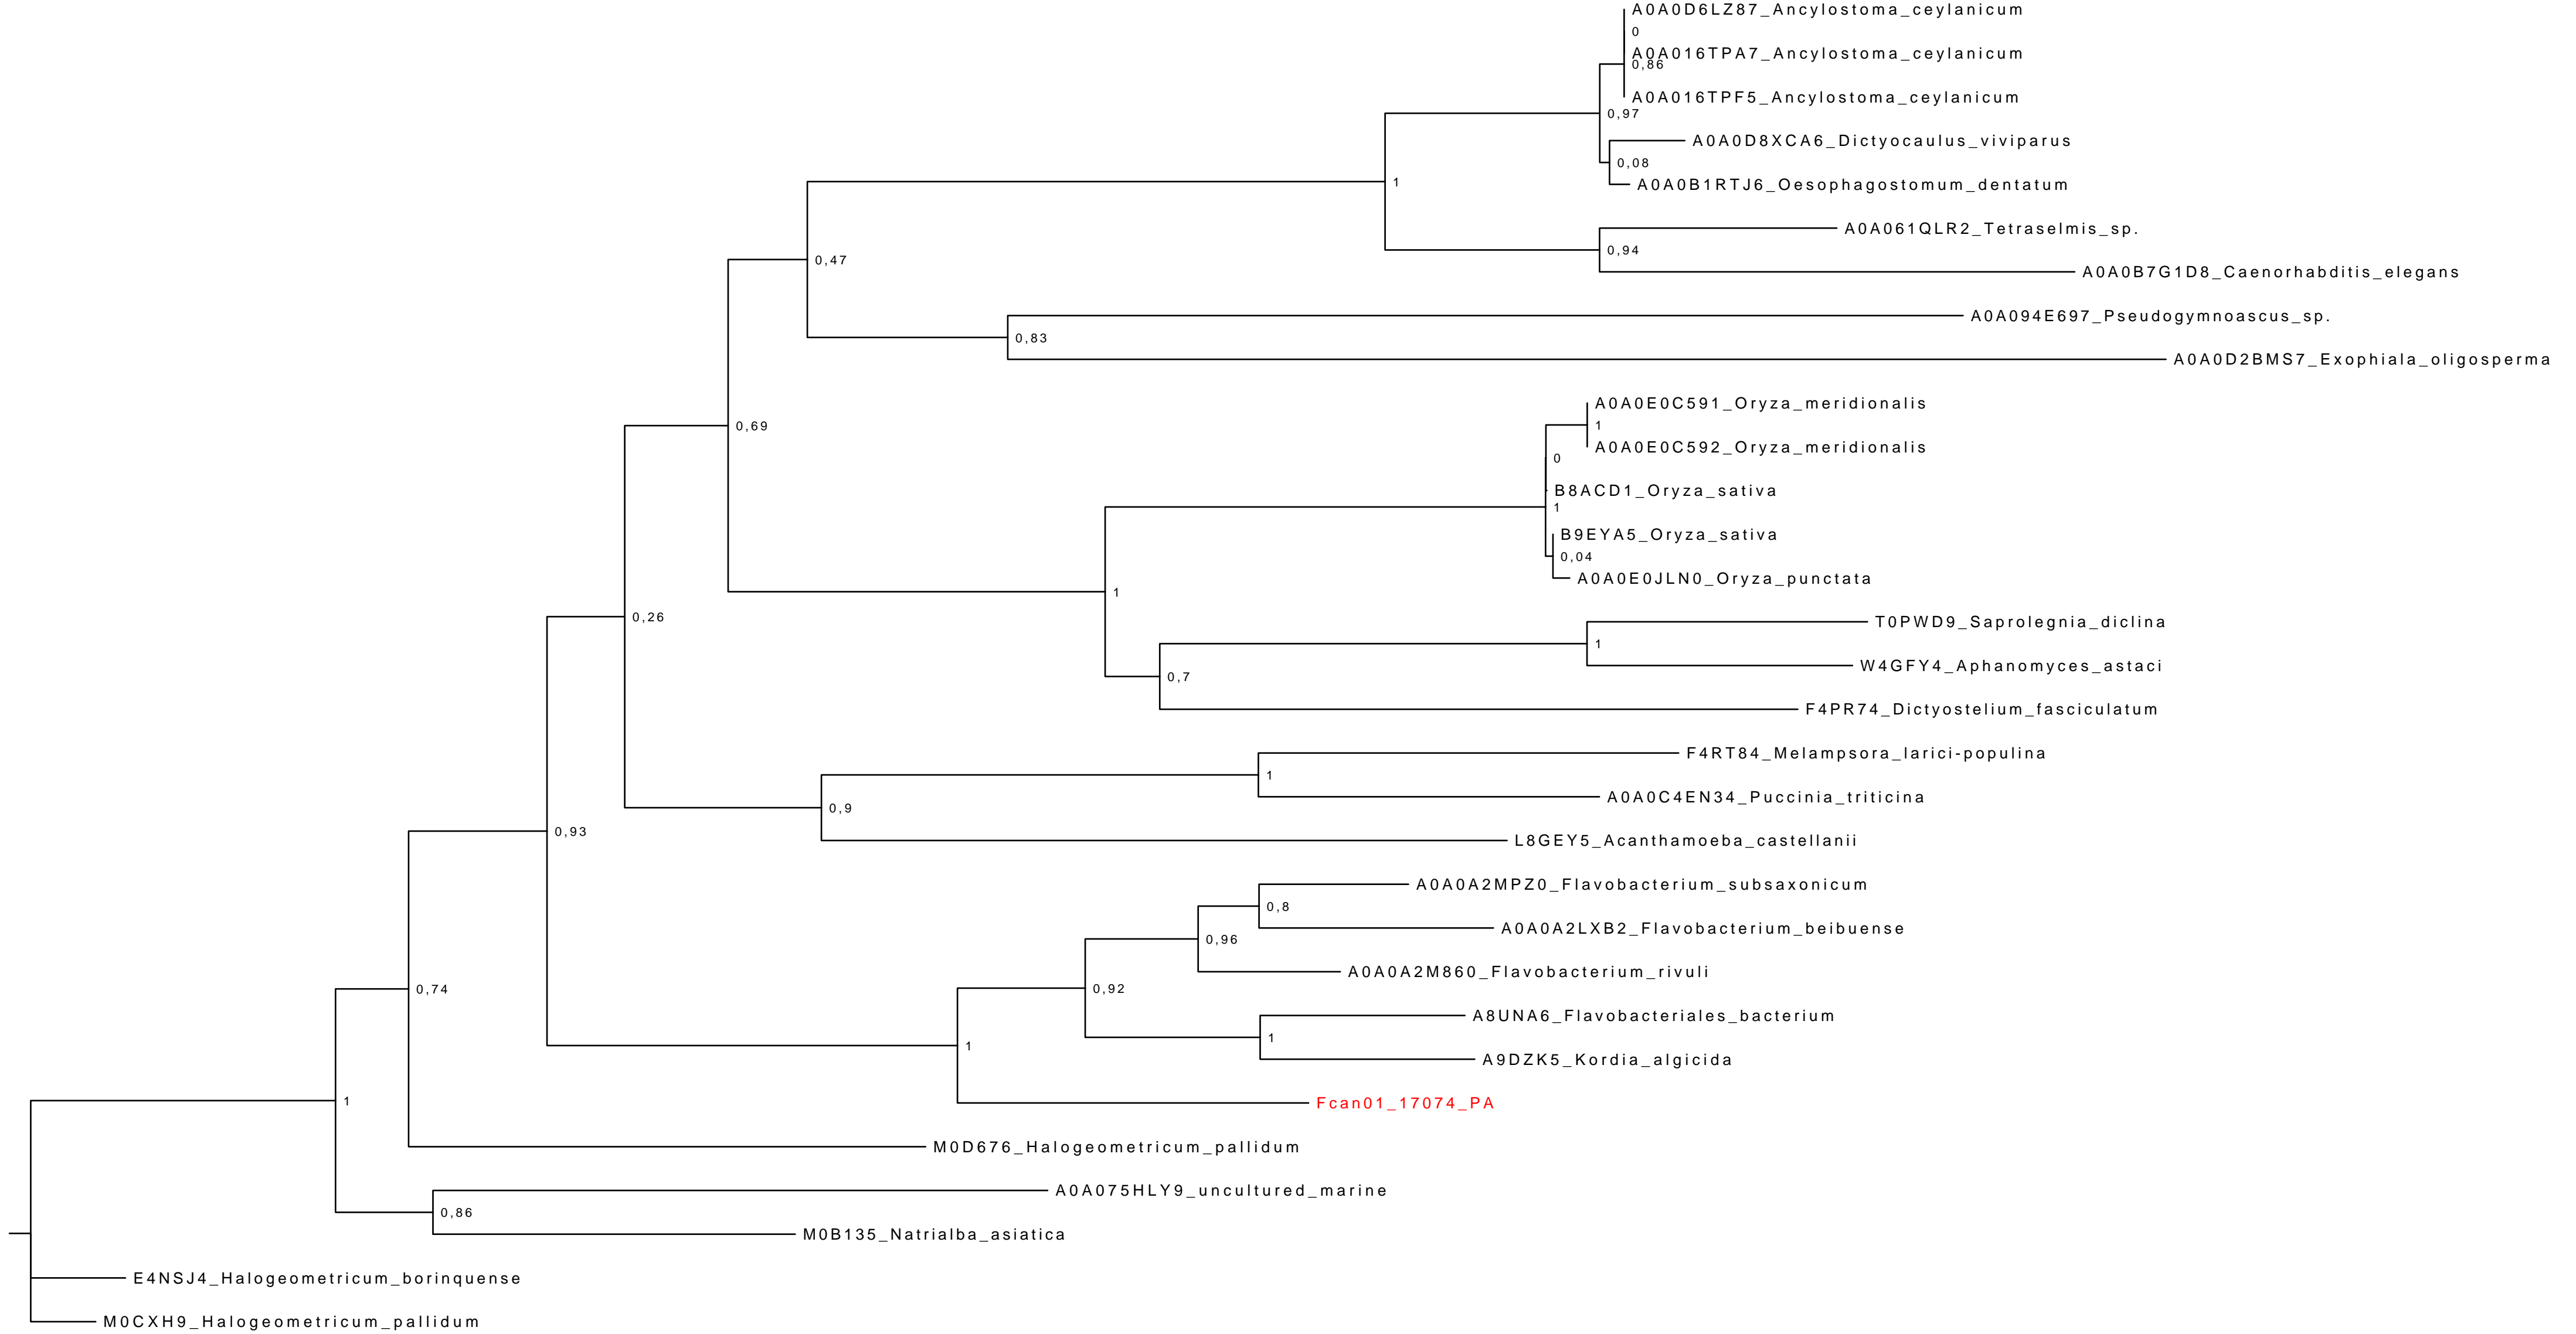

0.4



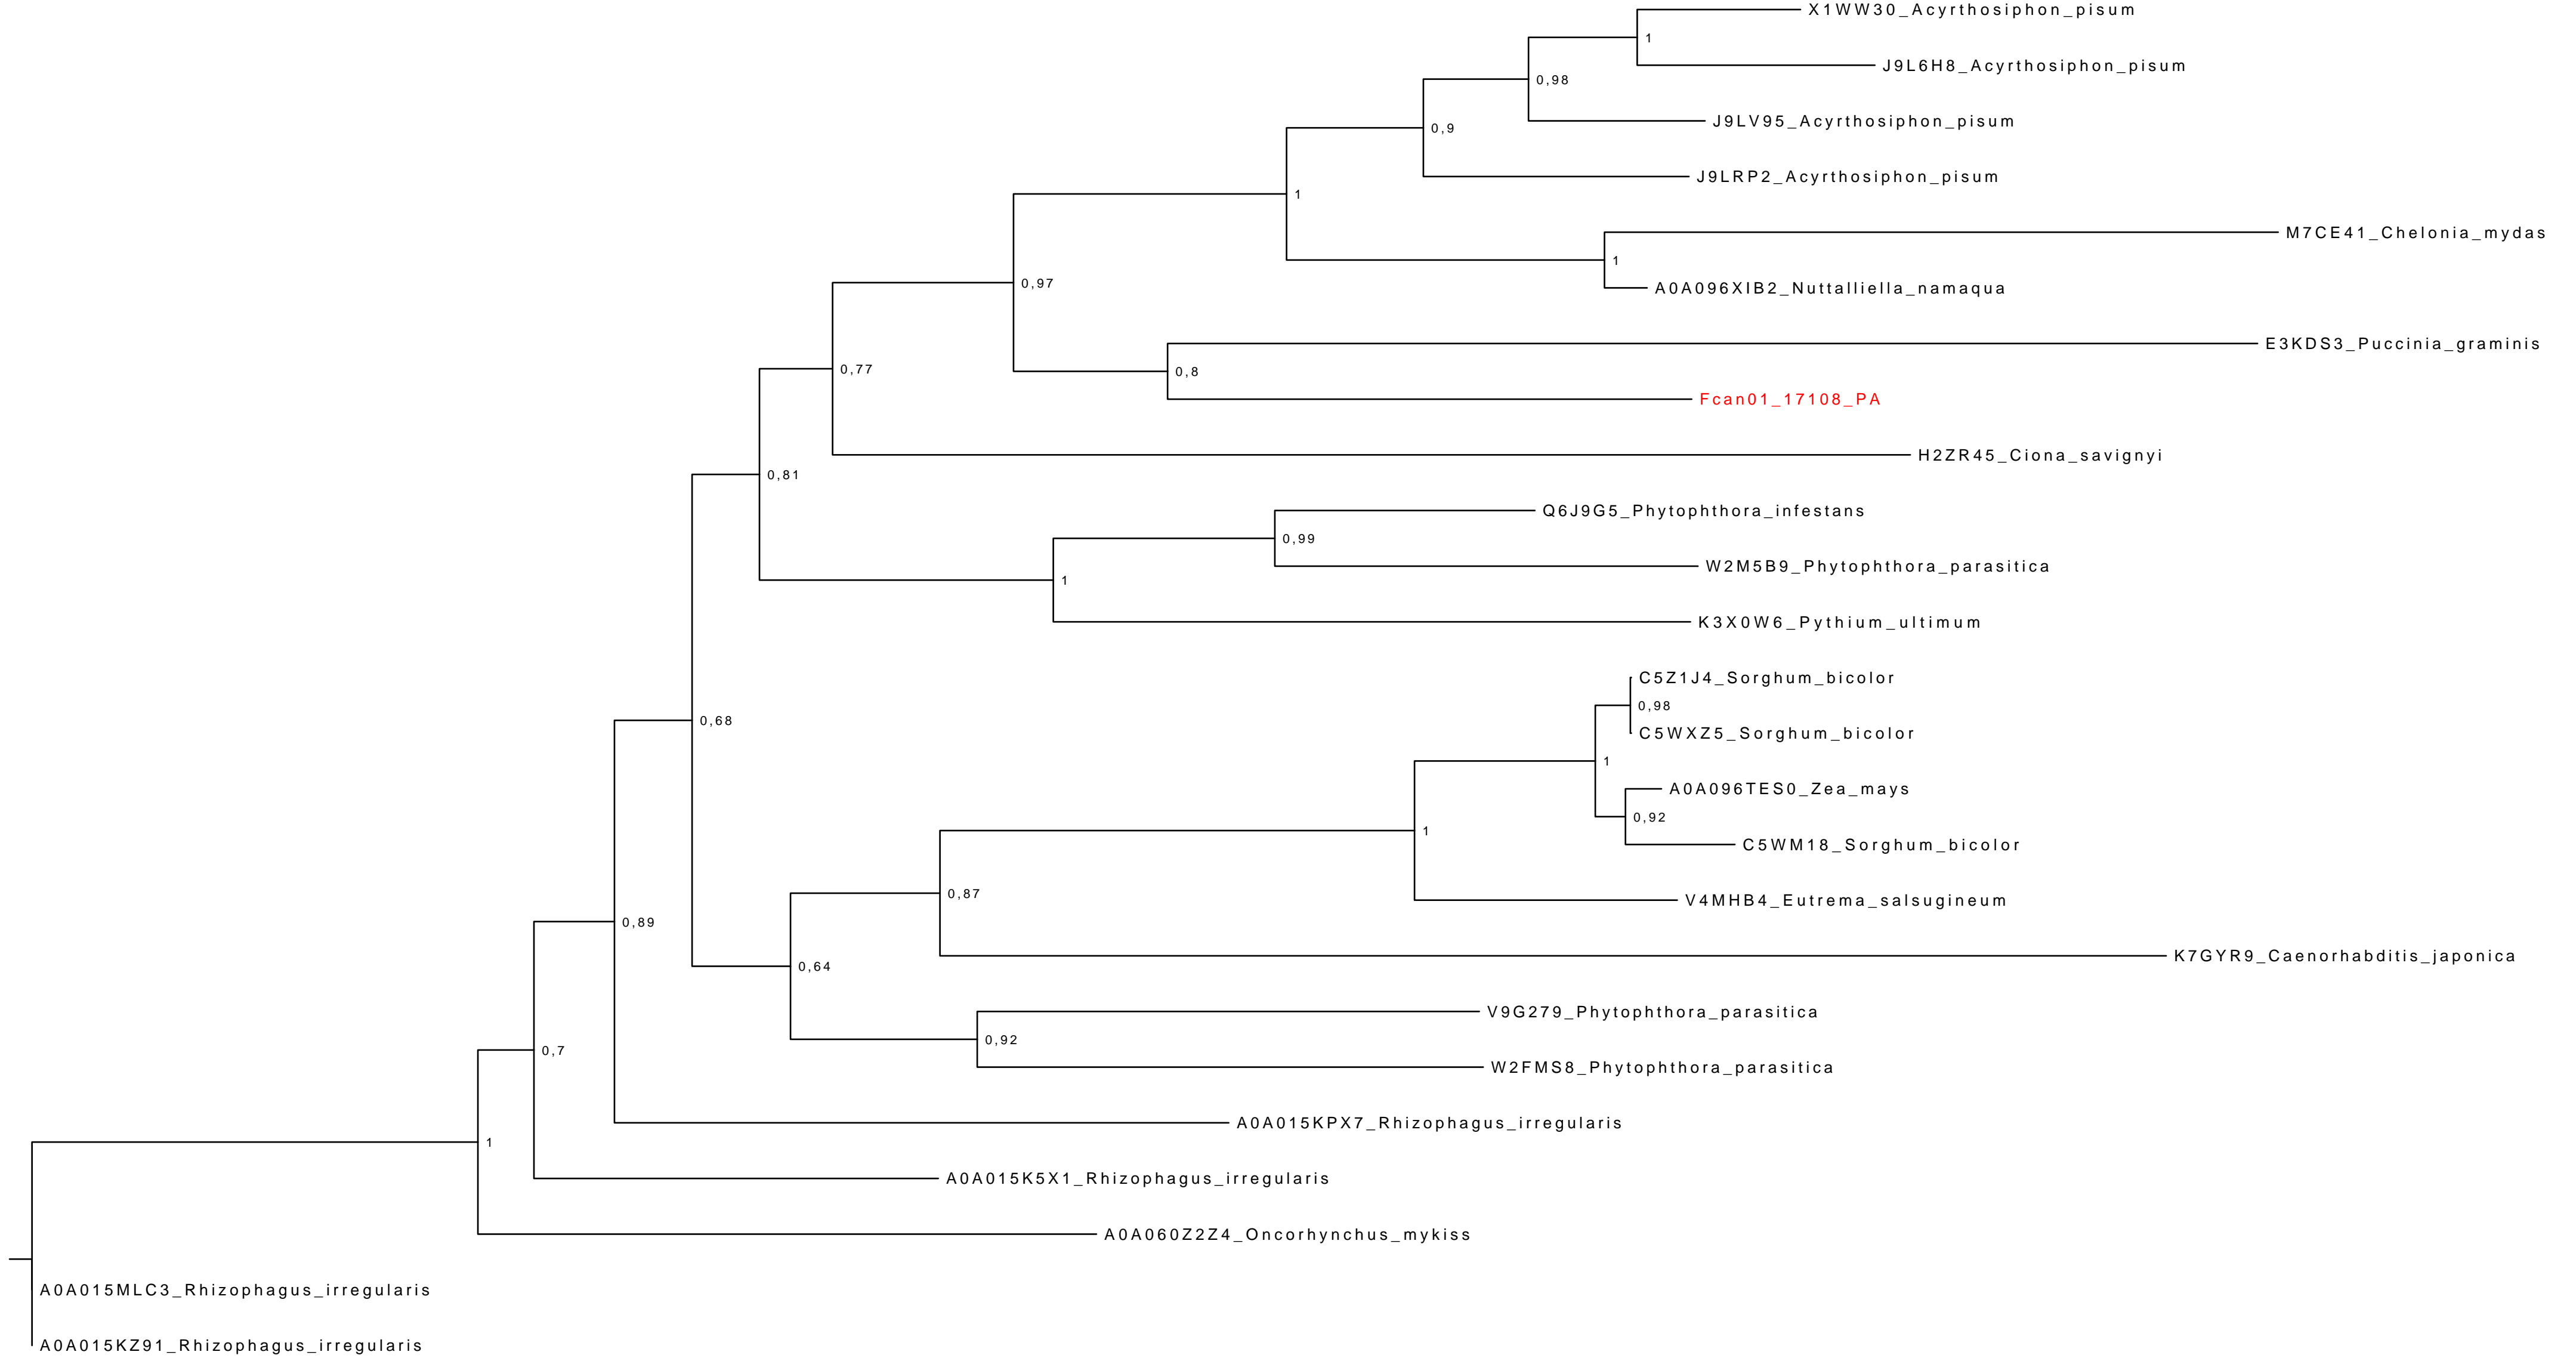

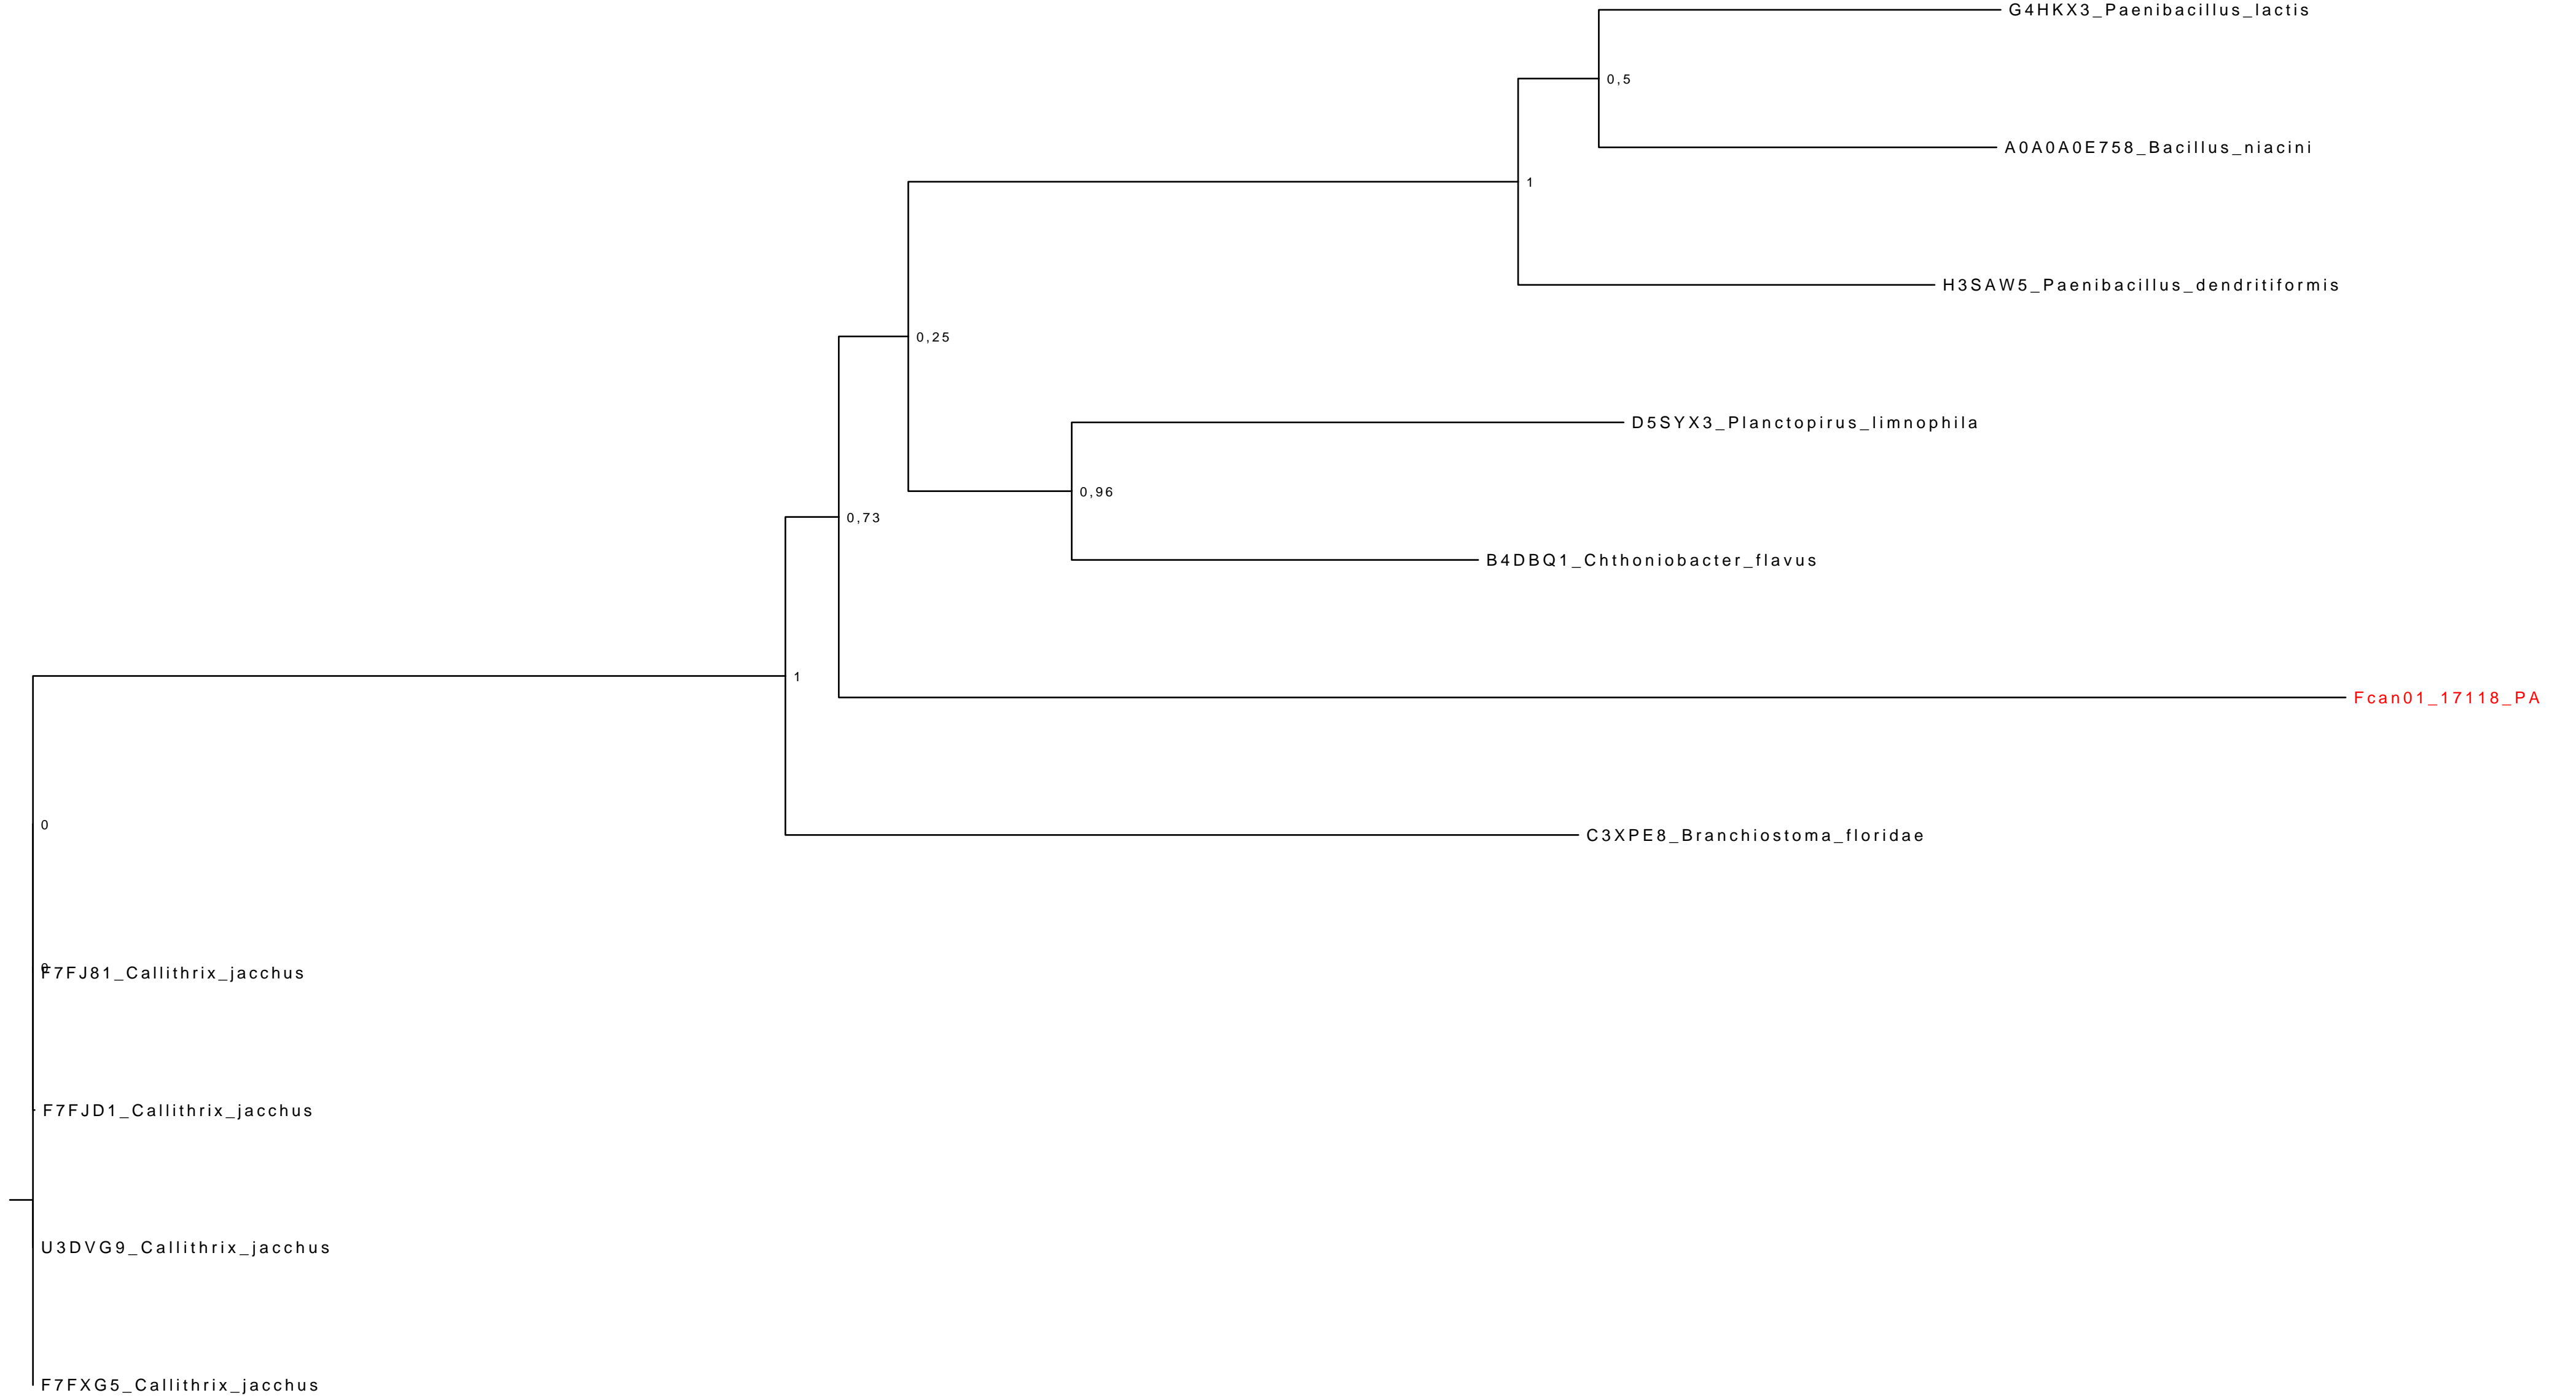

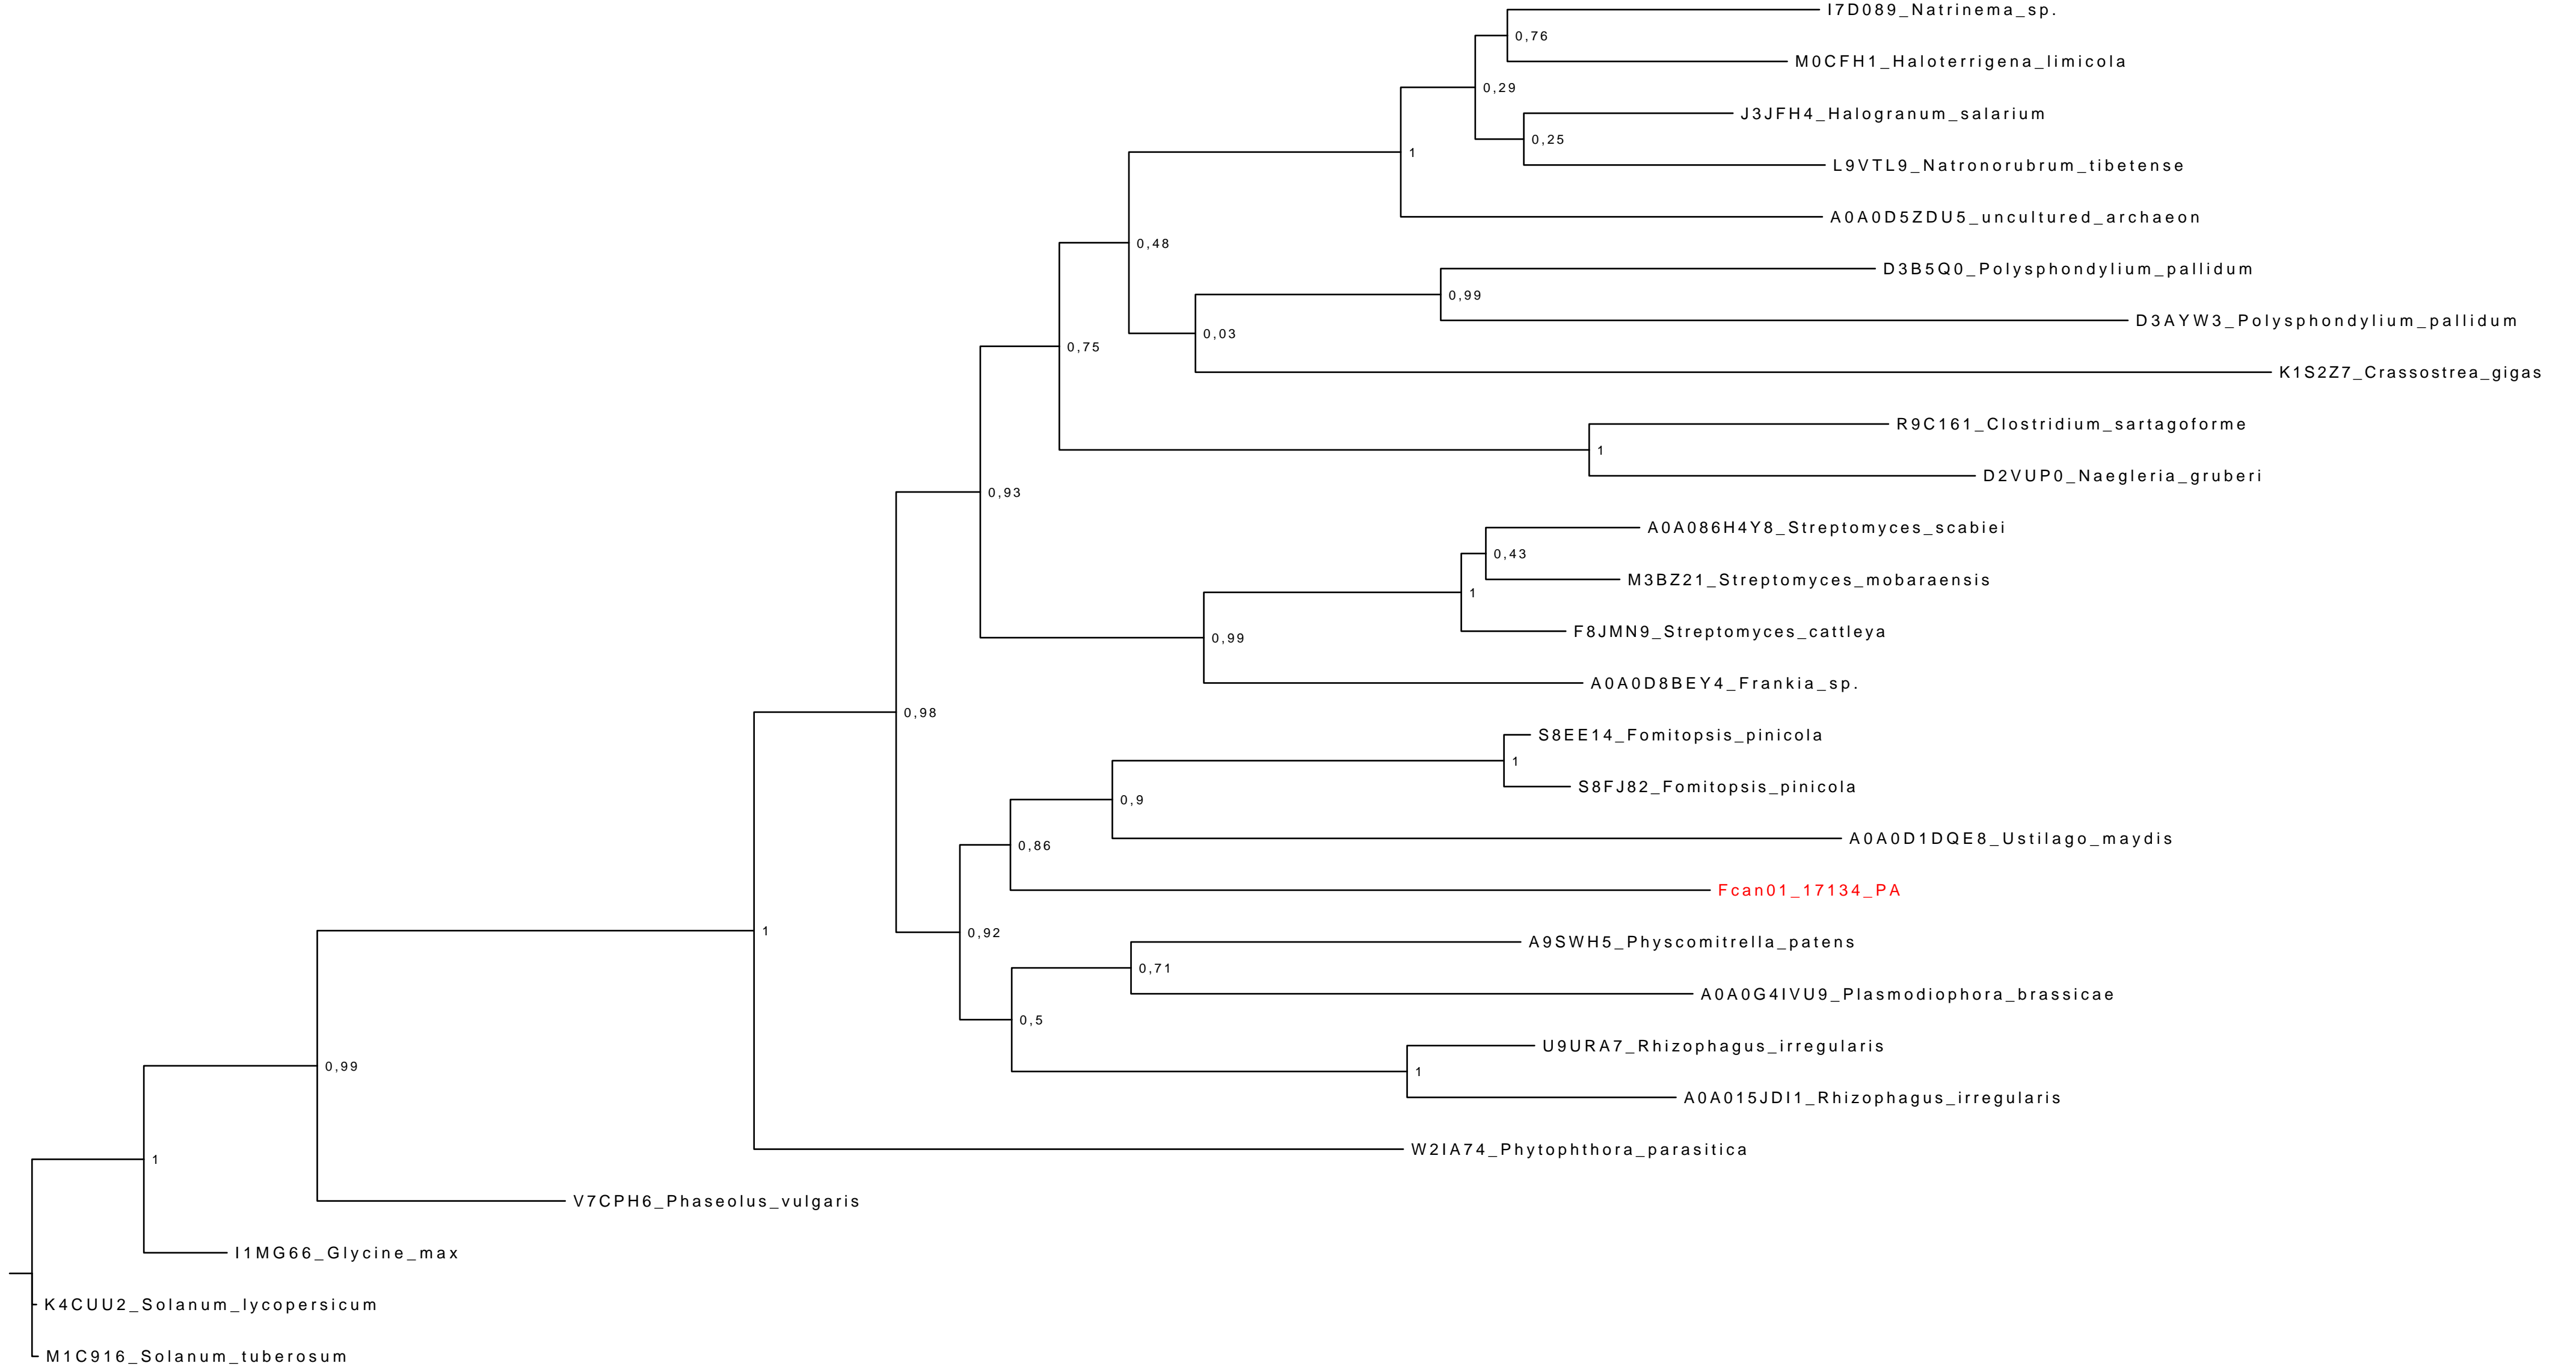

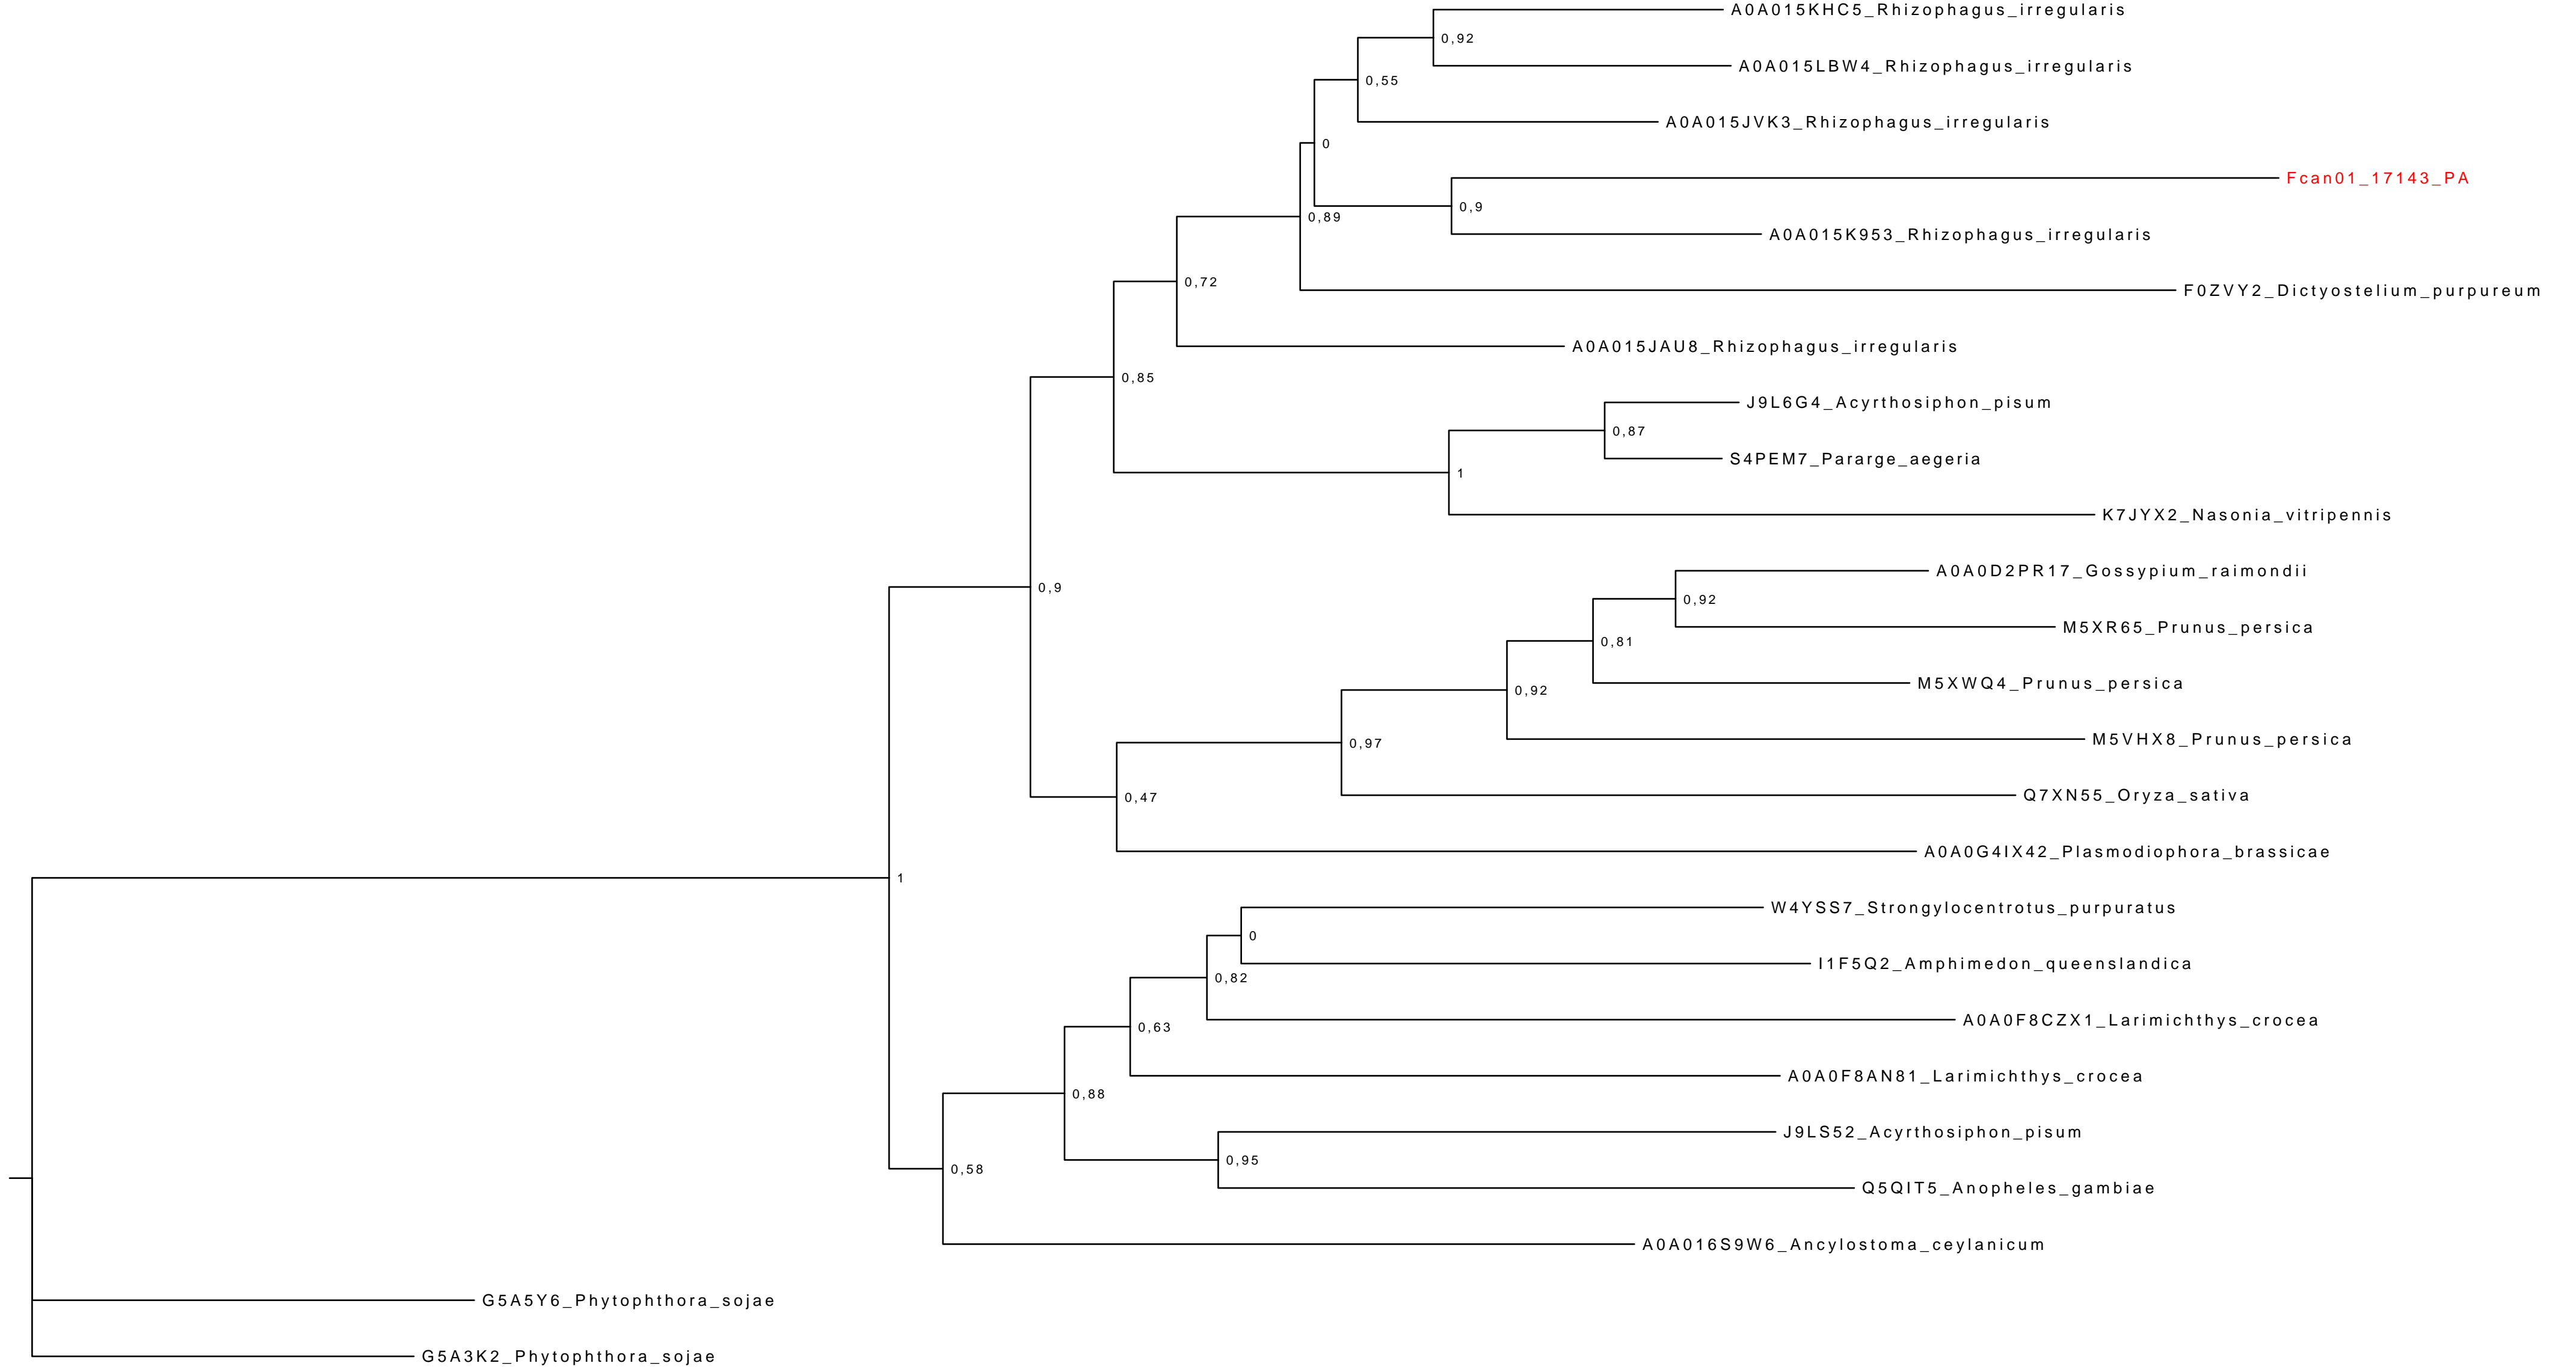

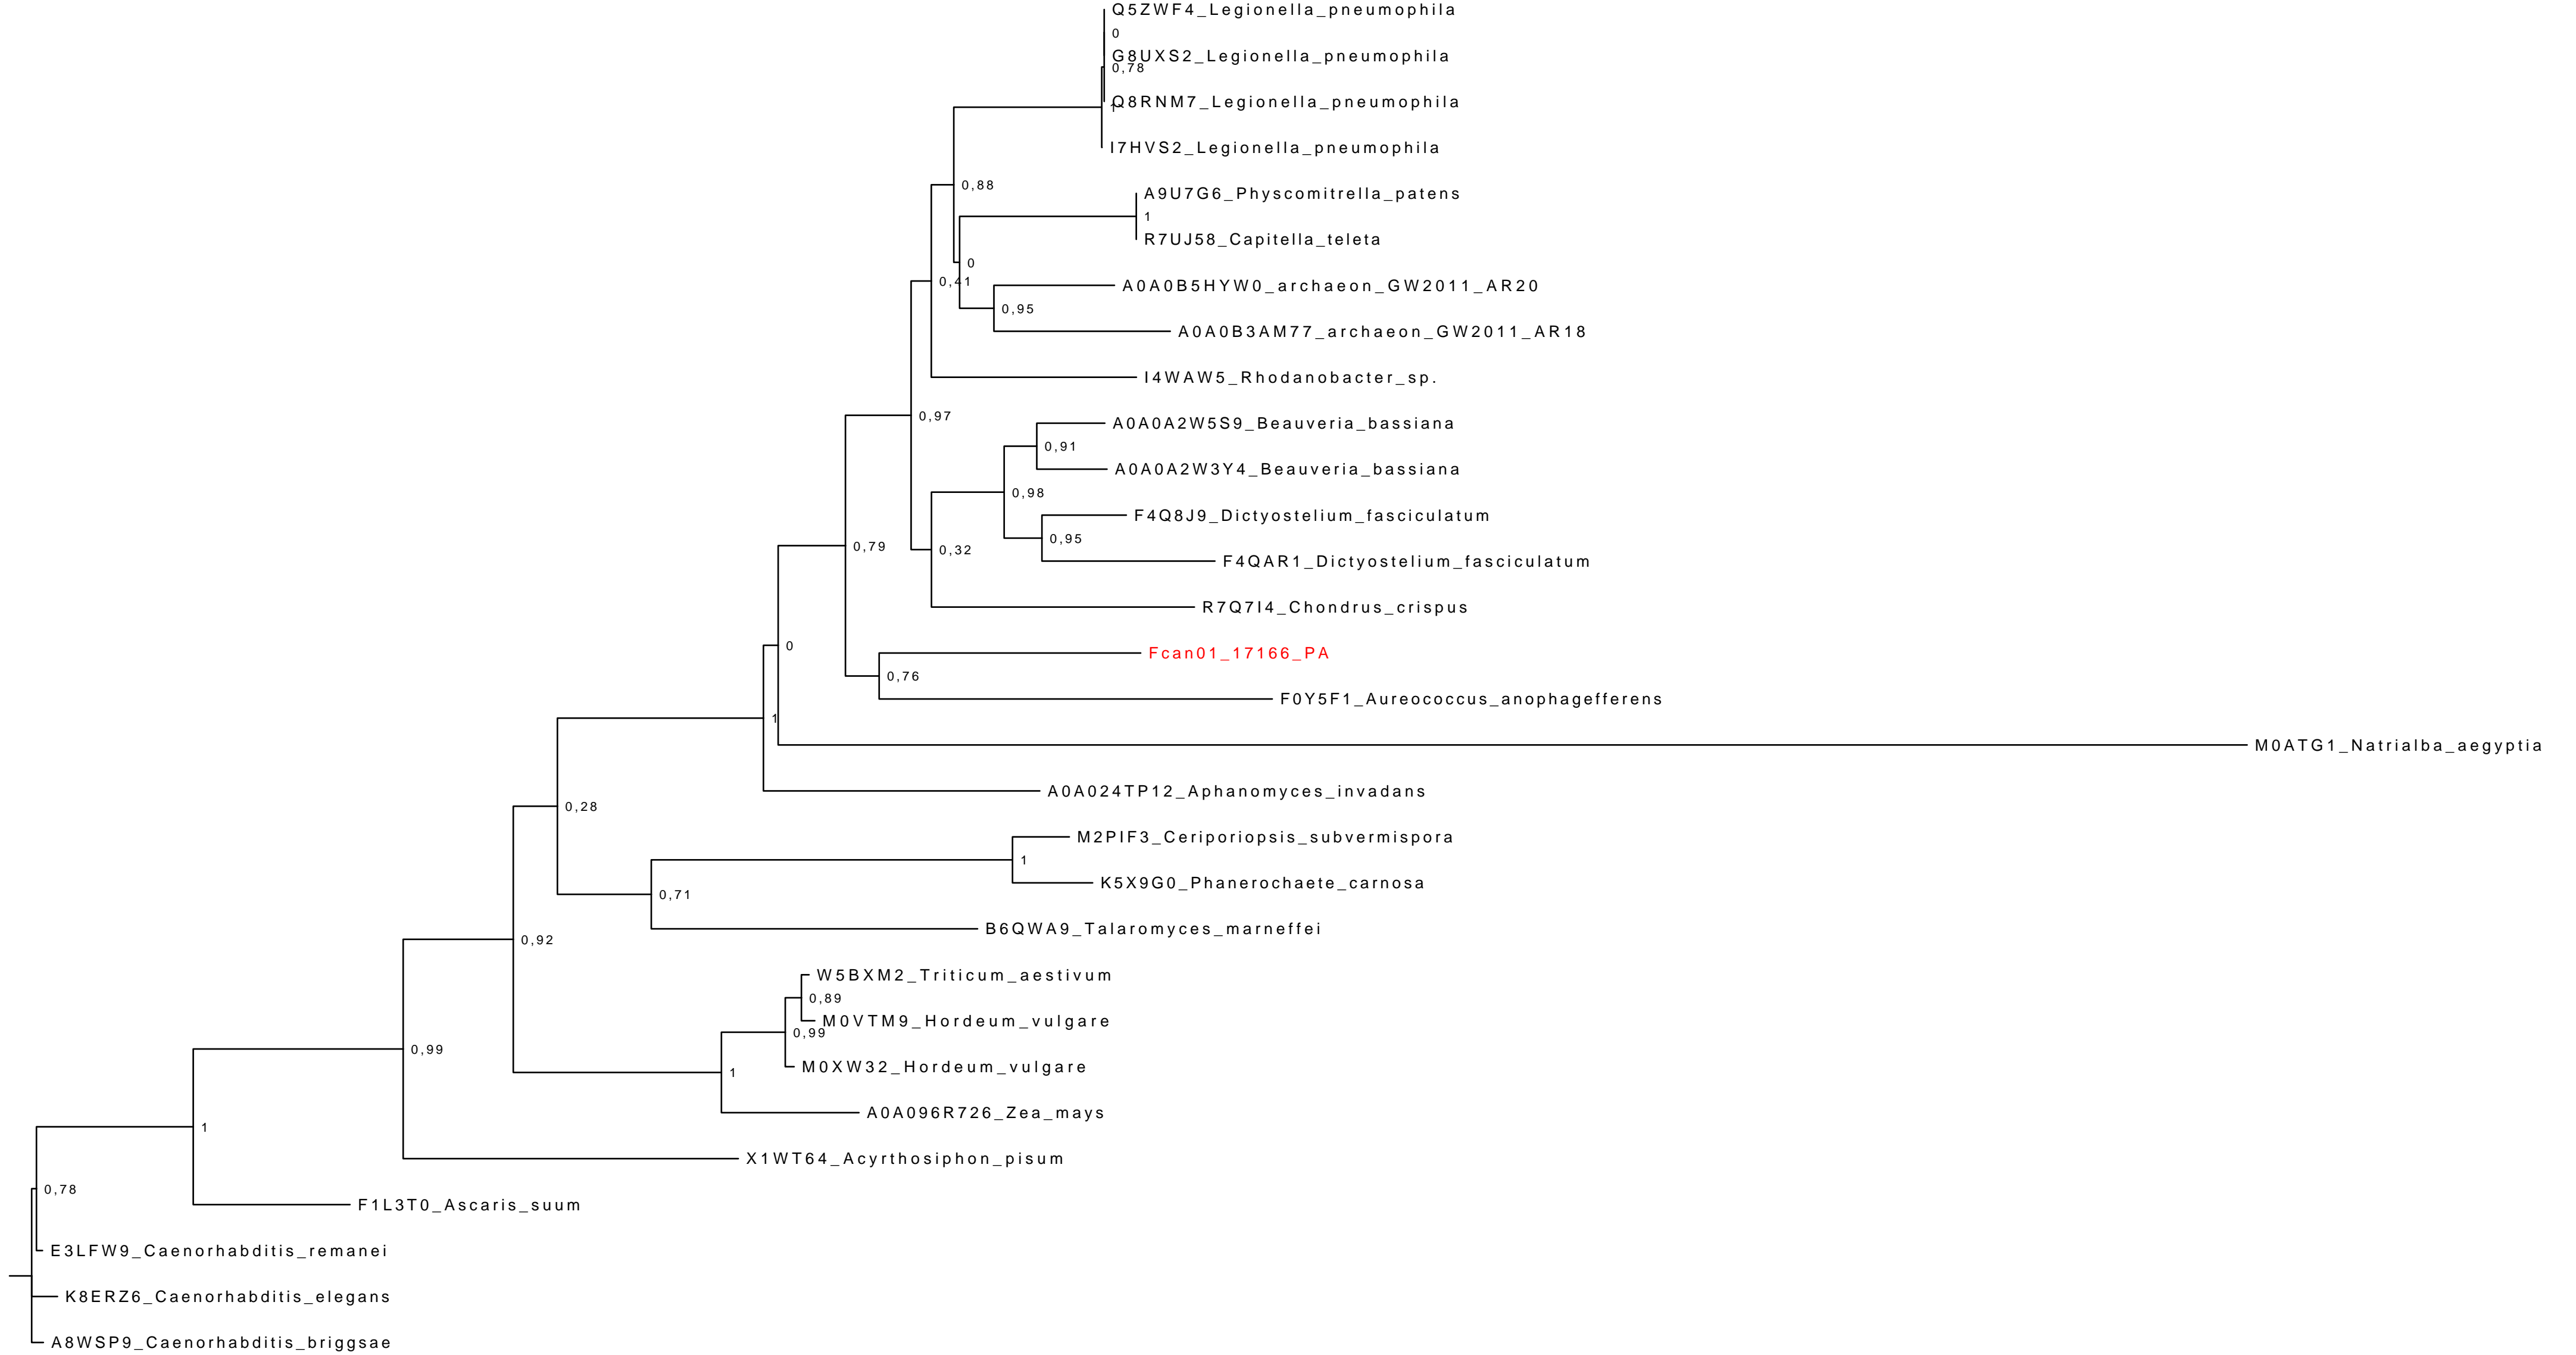

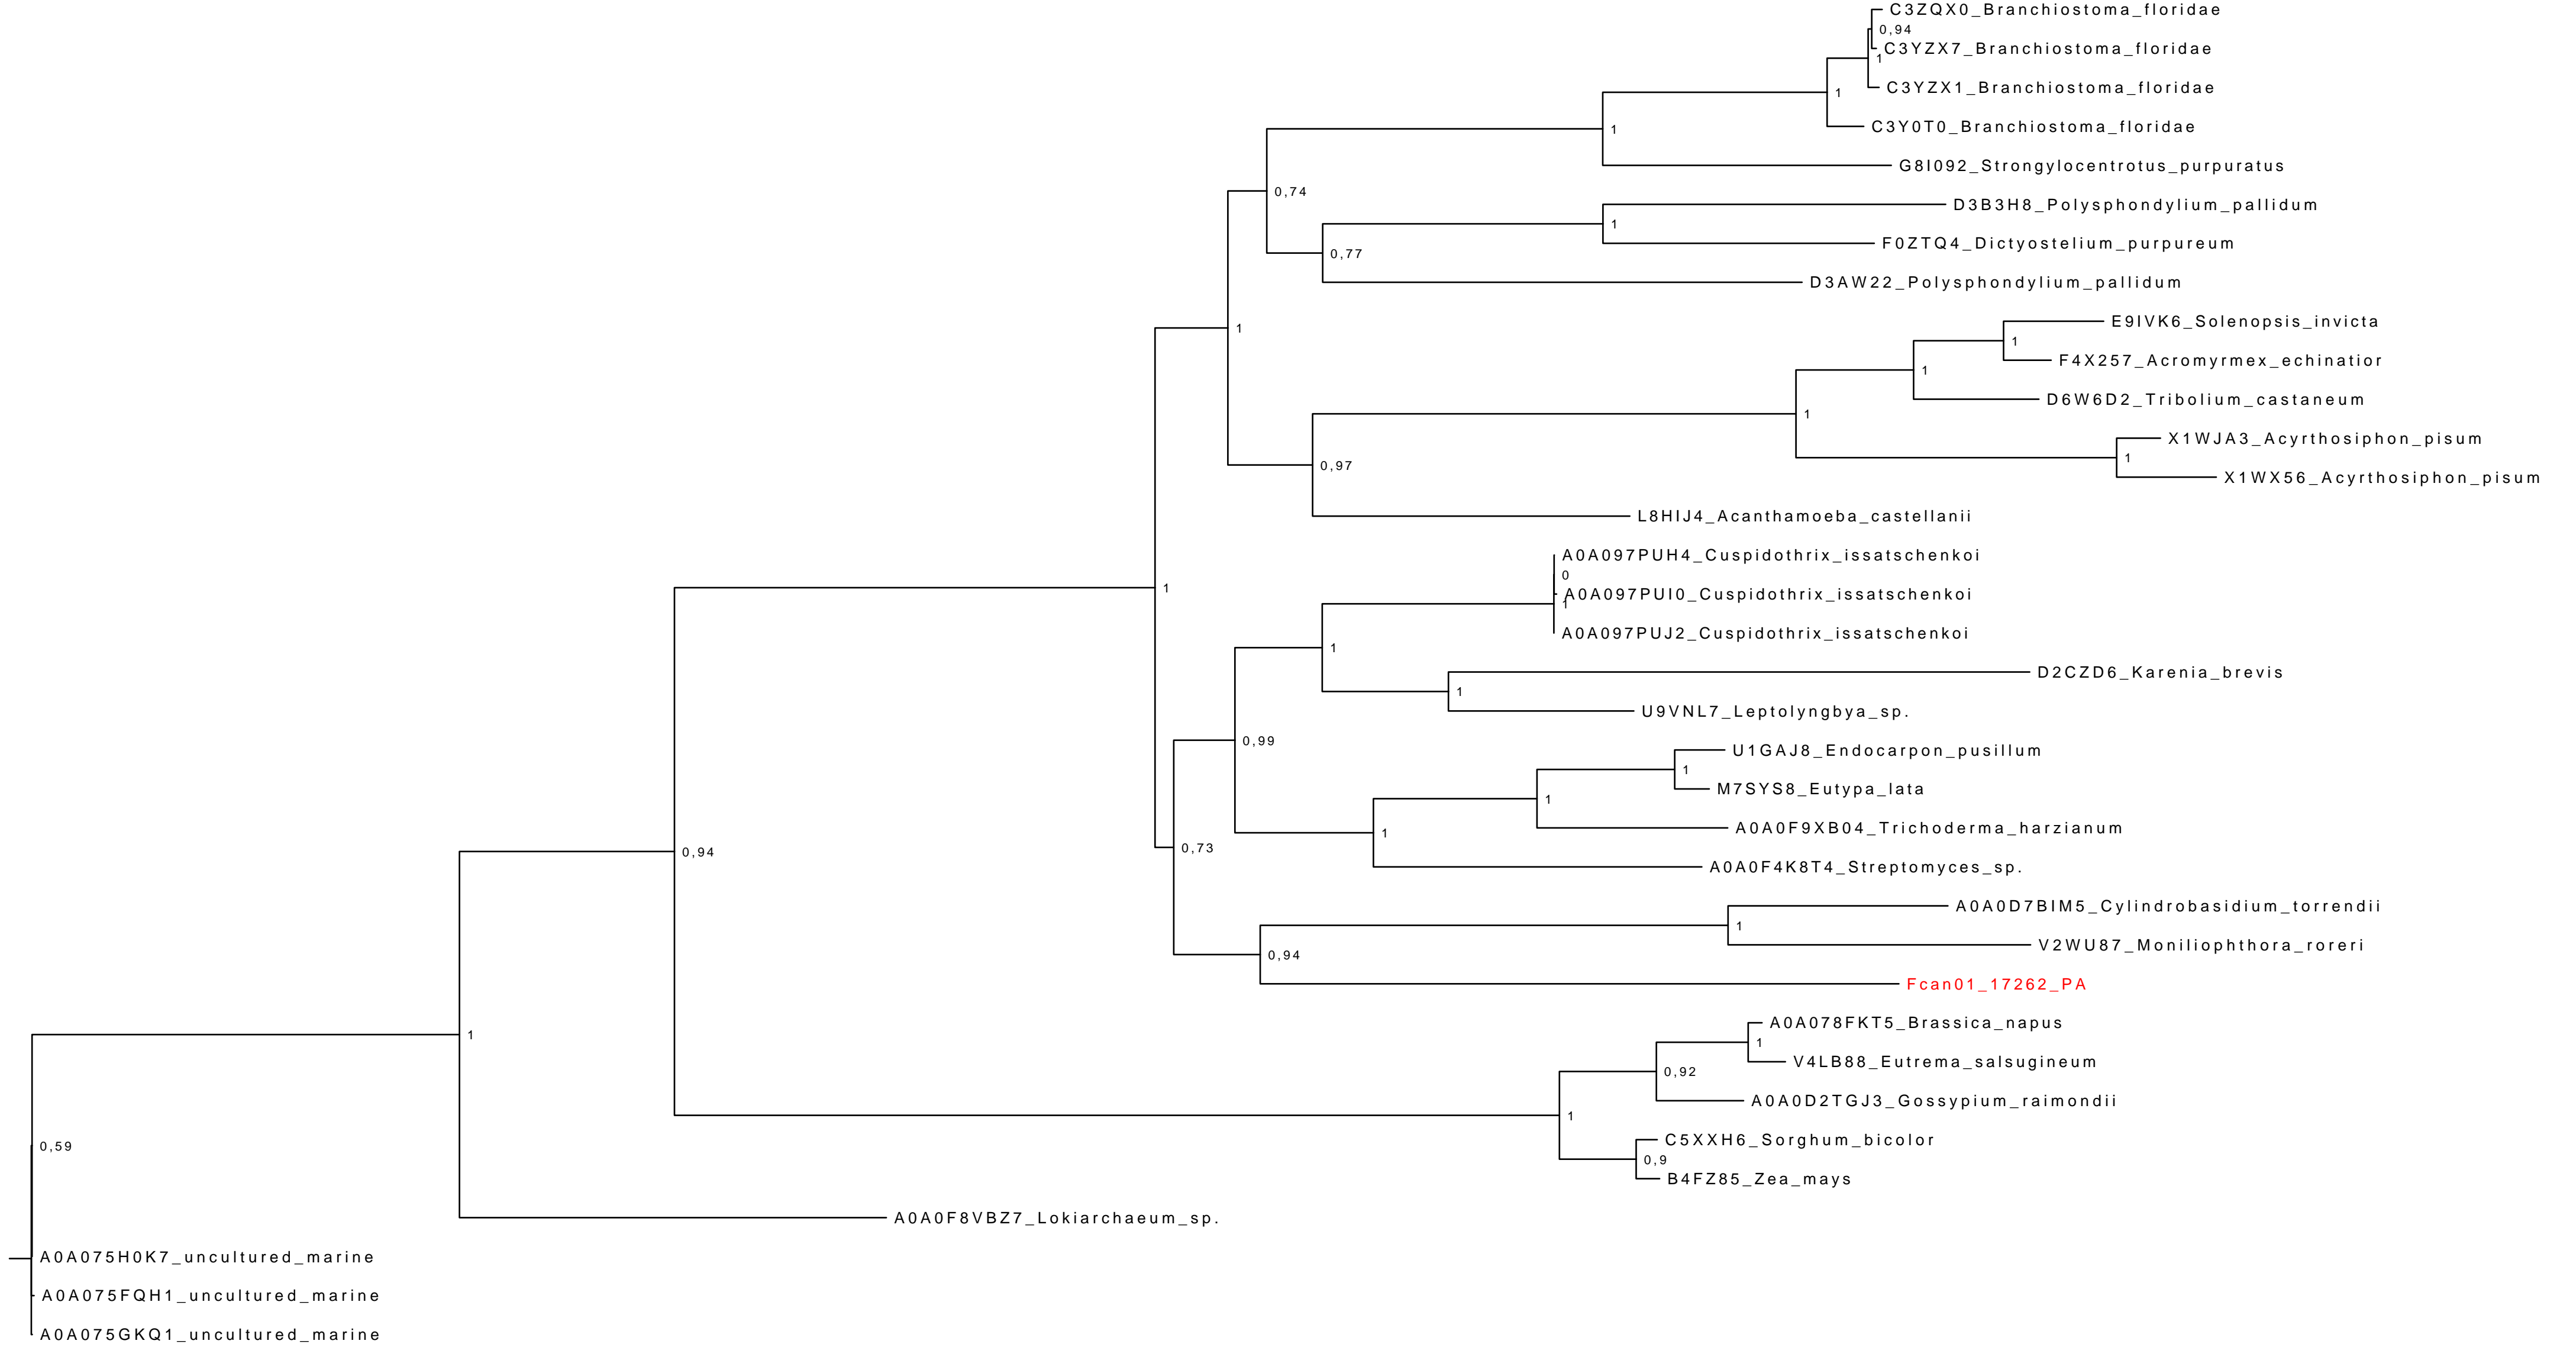

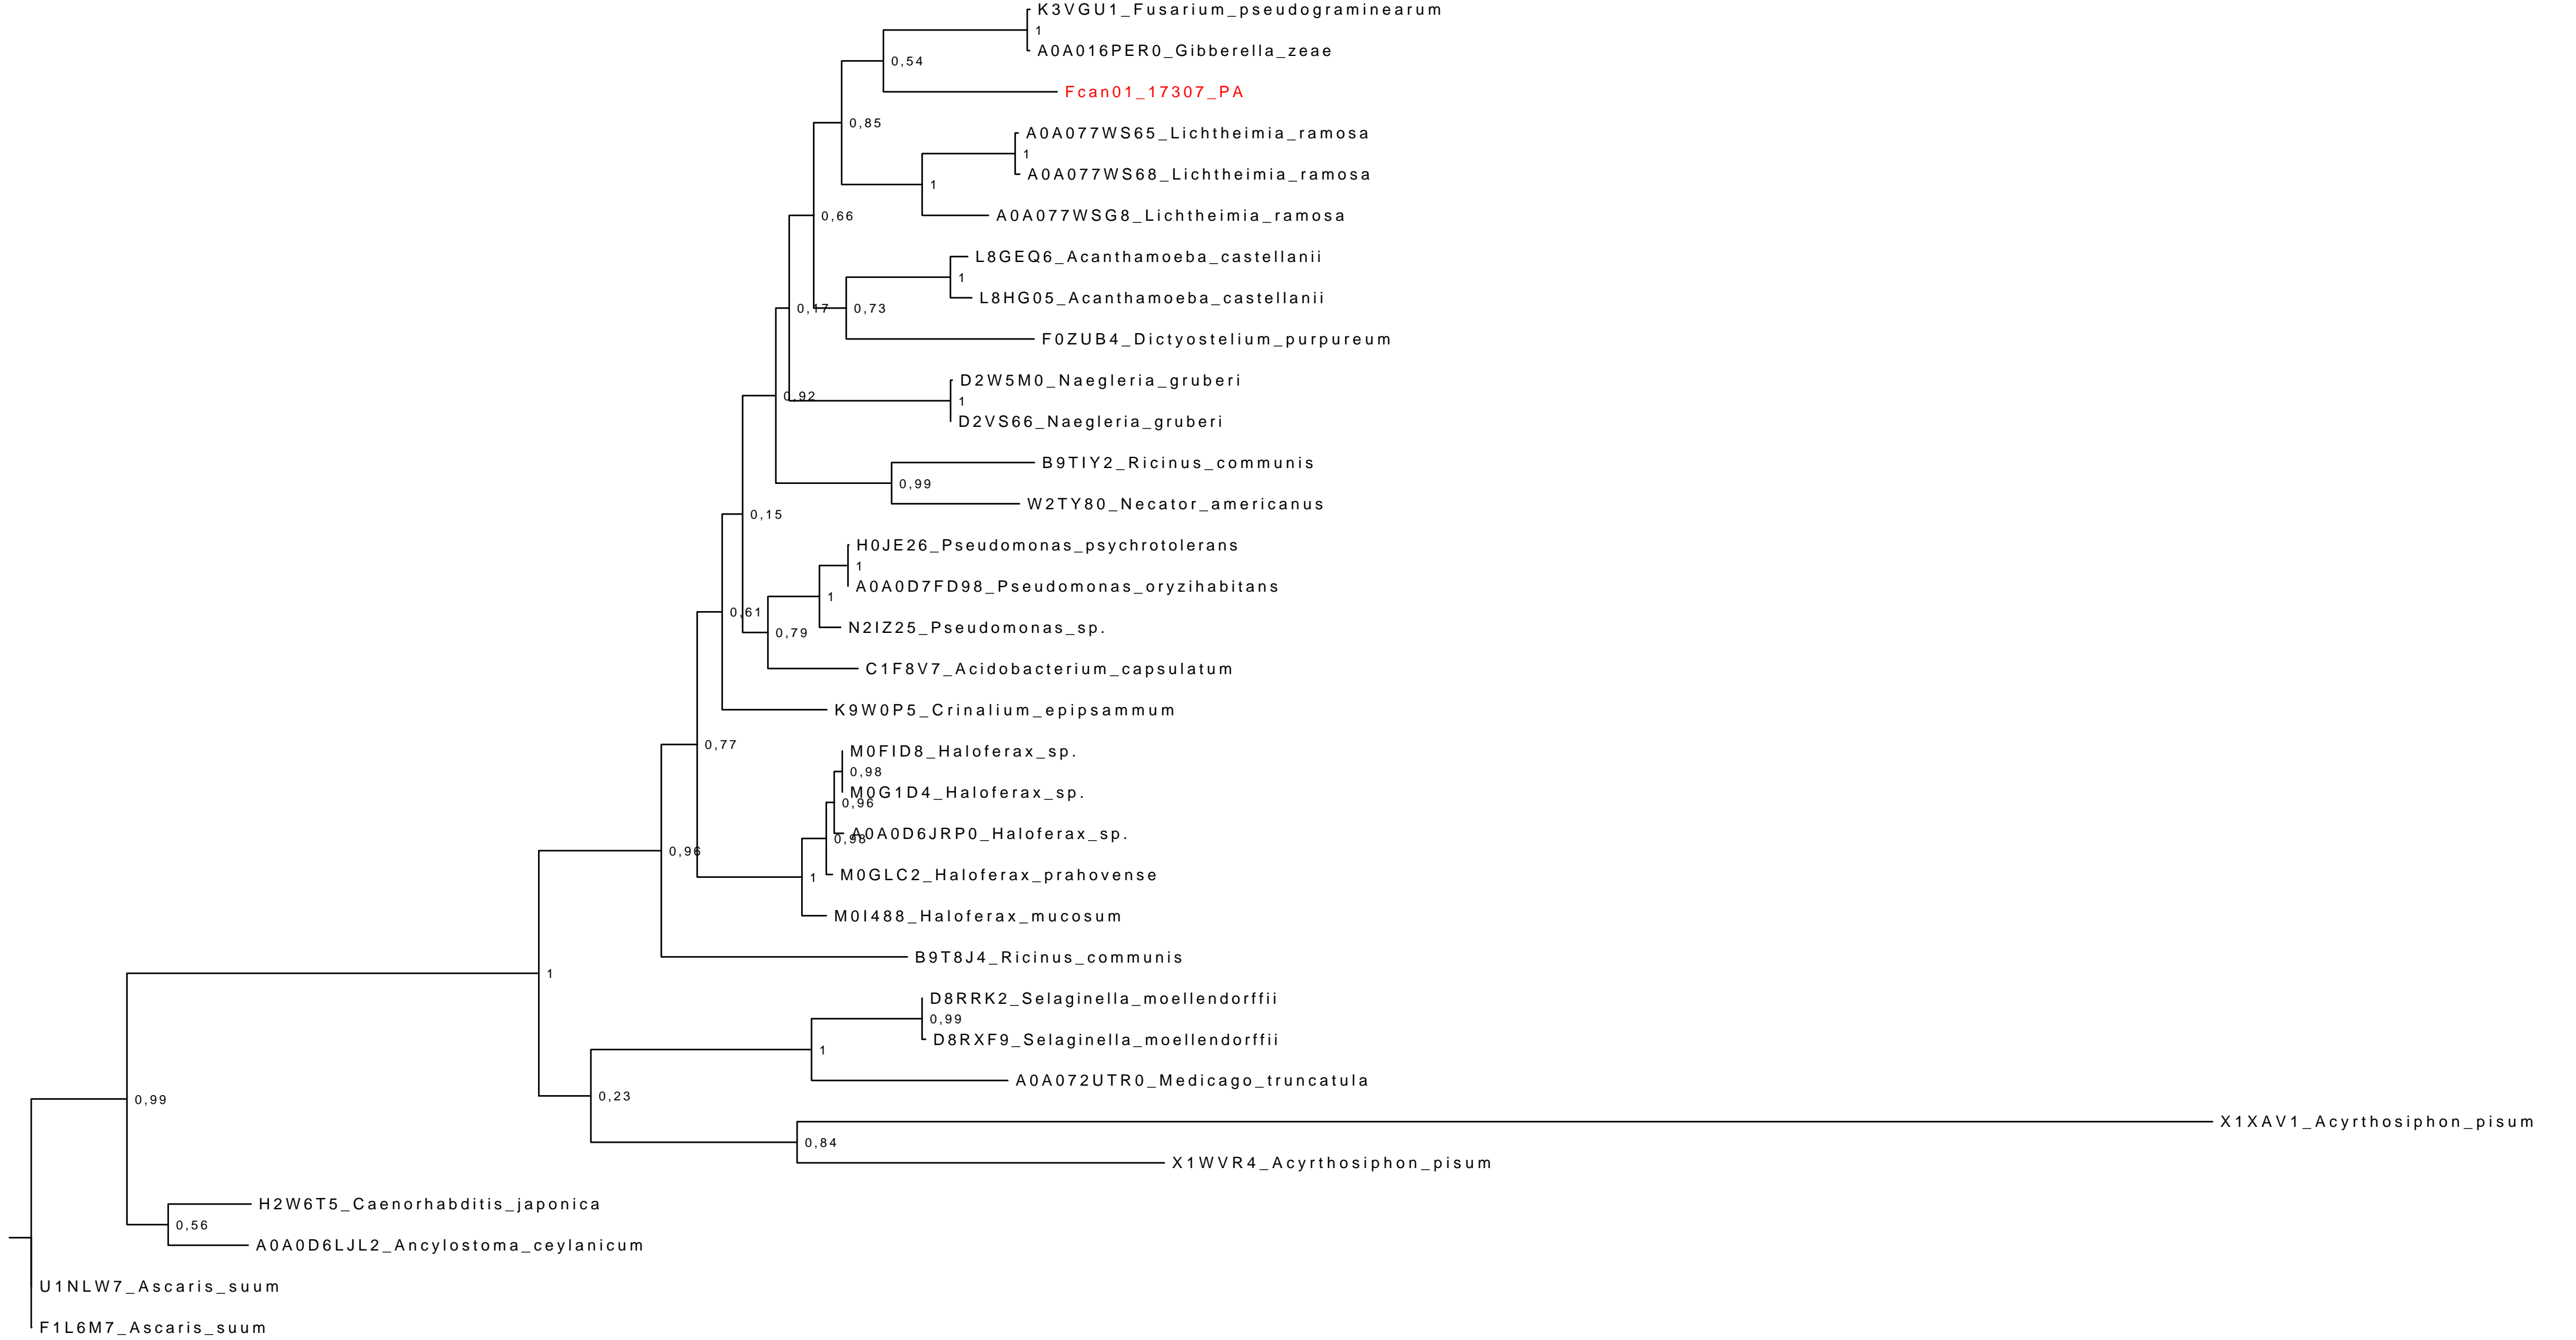

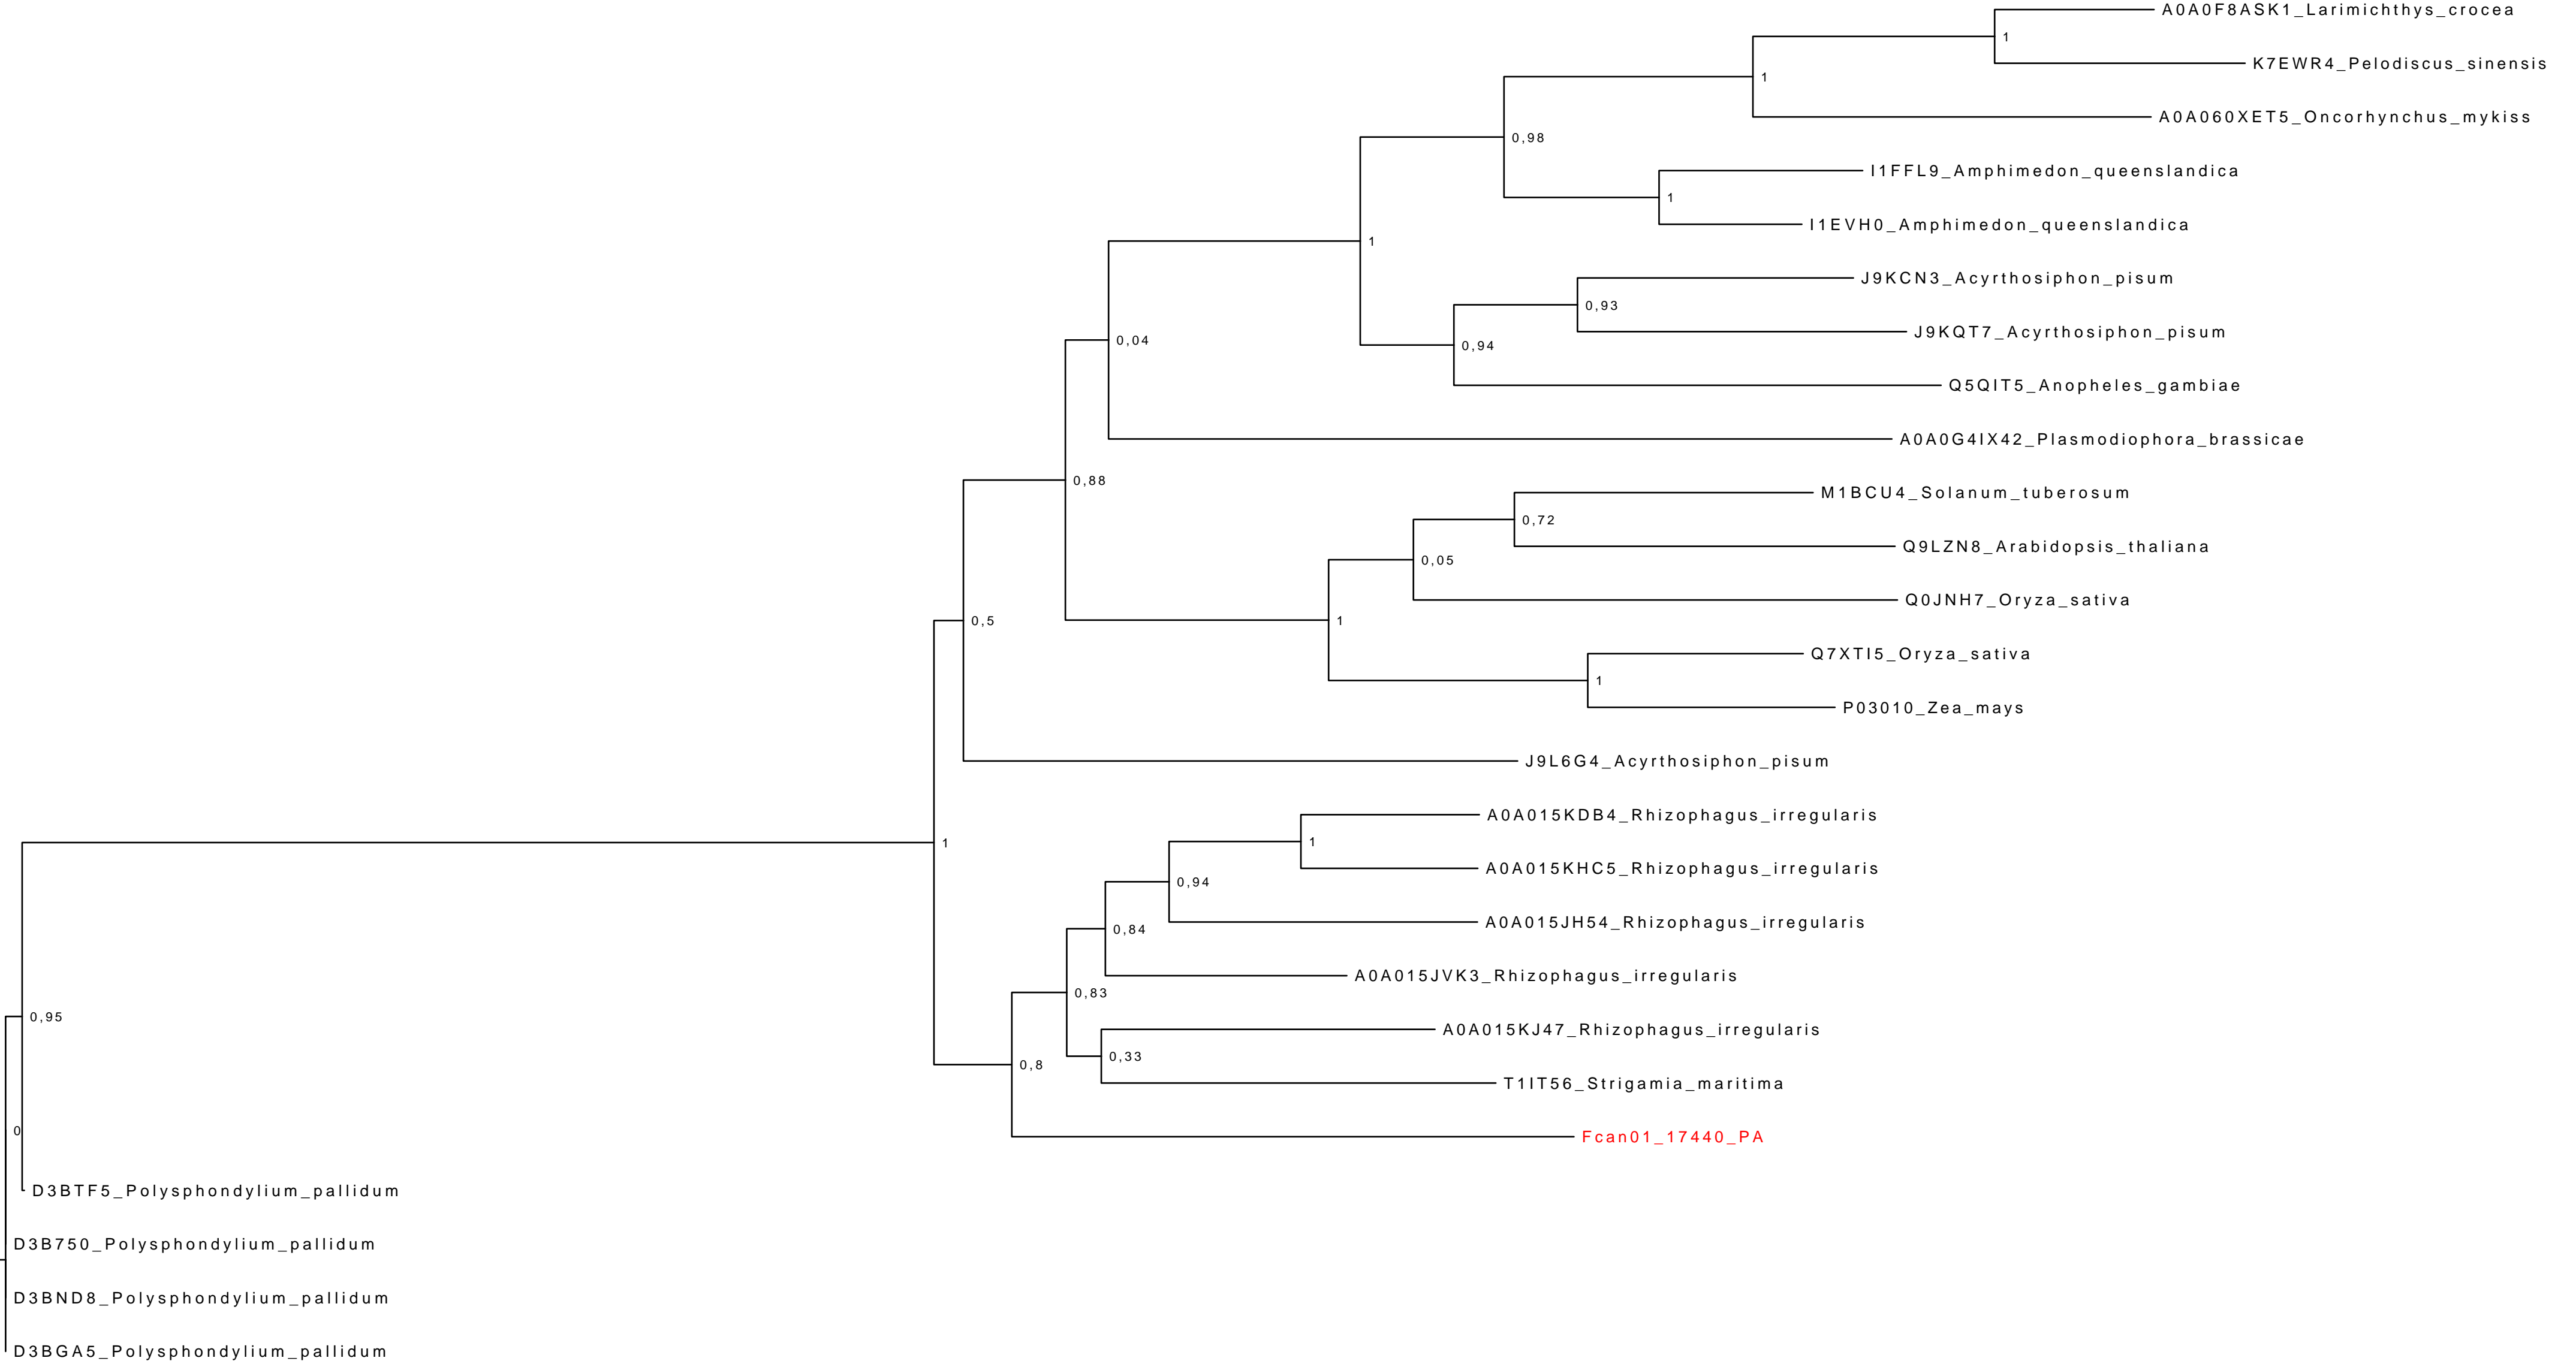



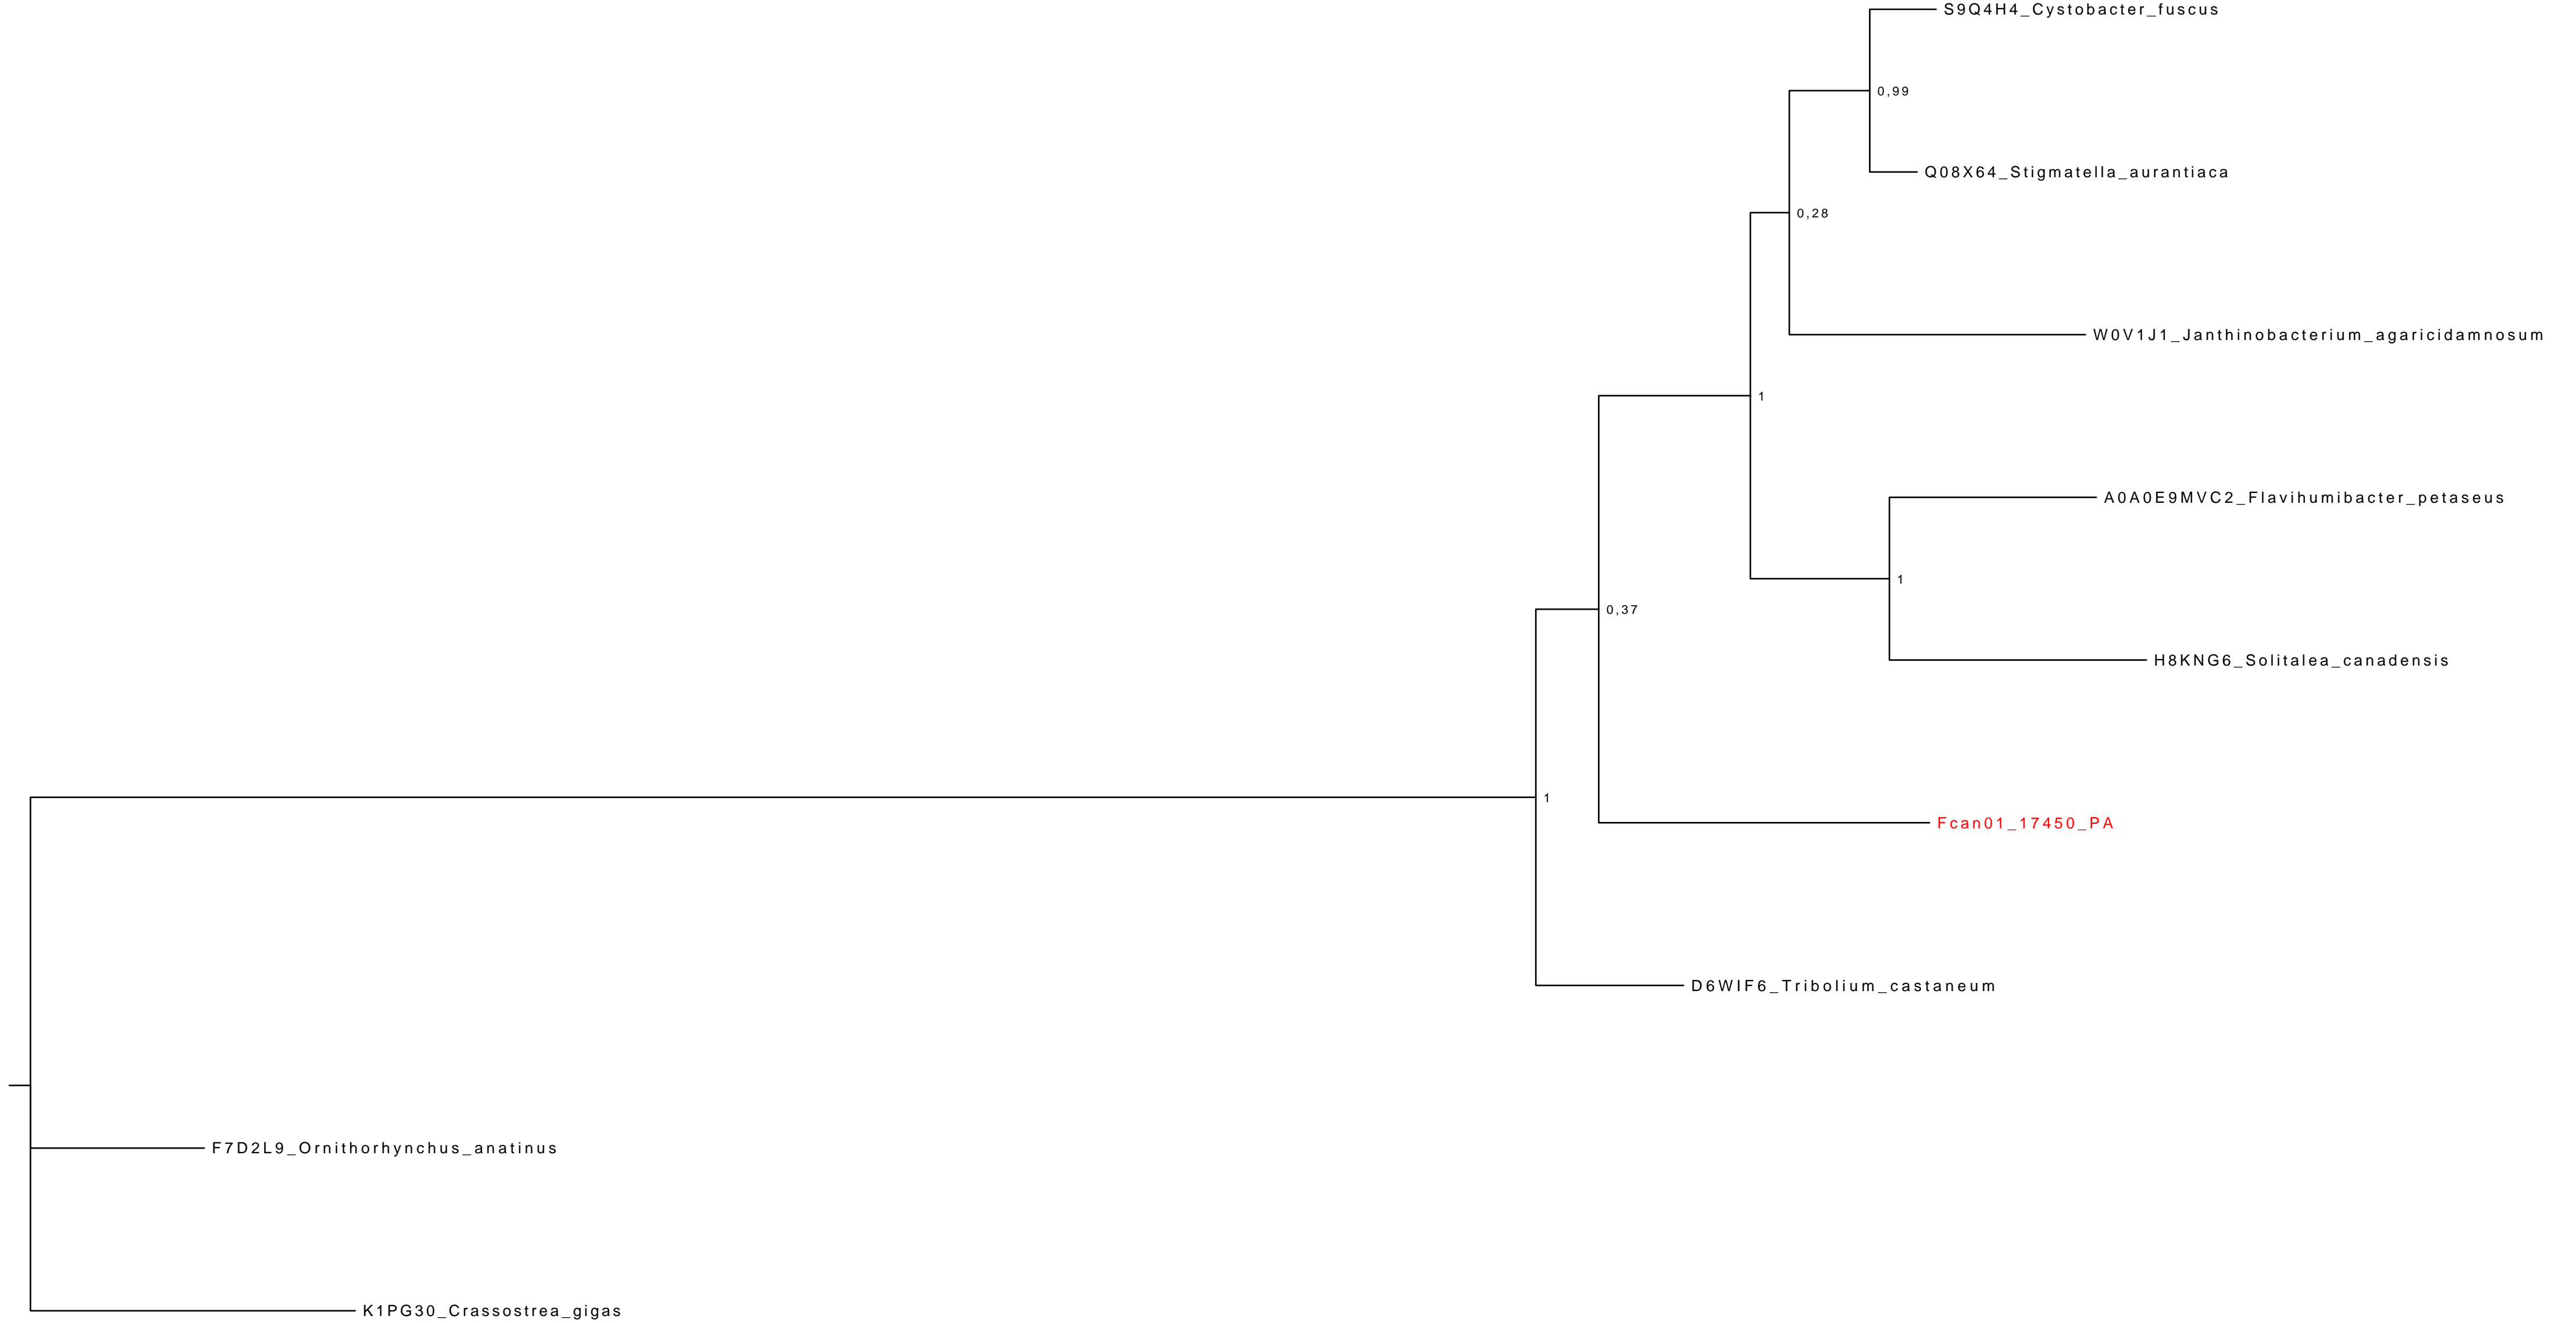

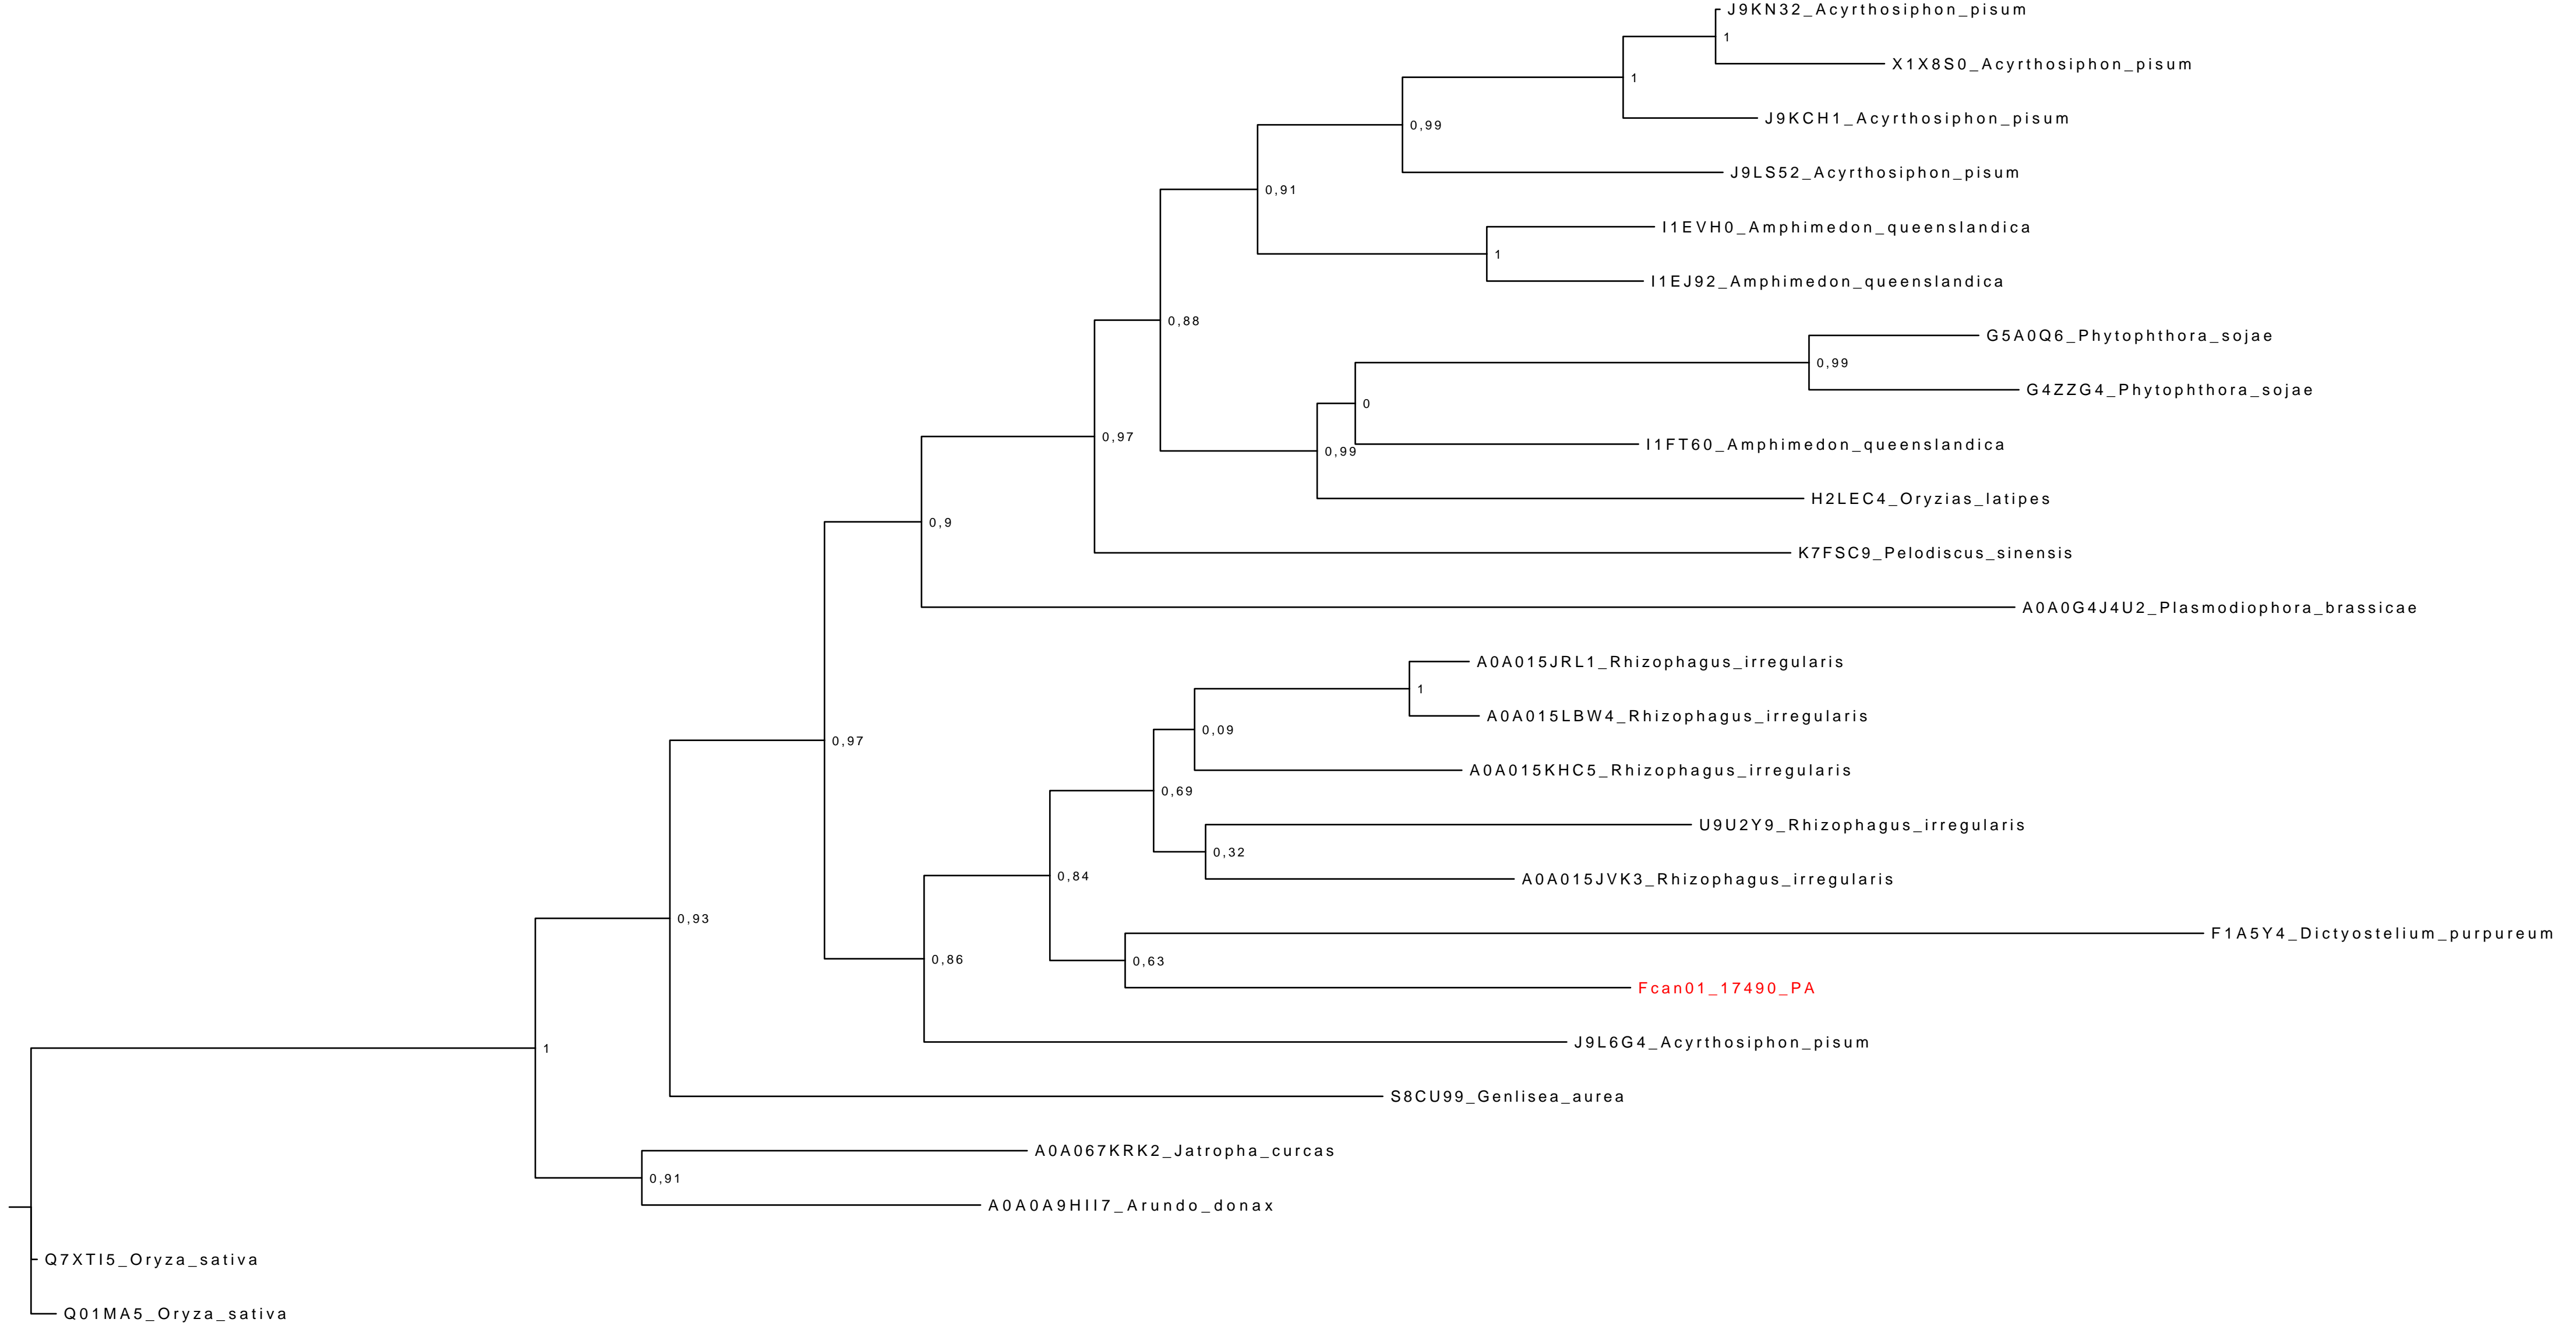

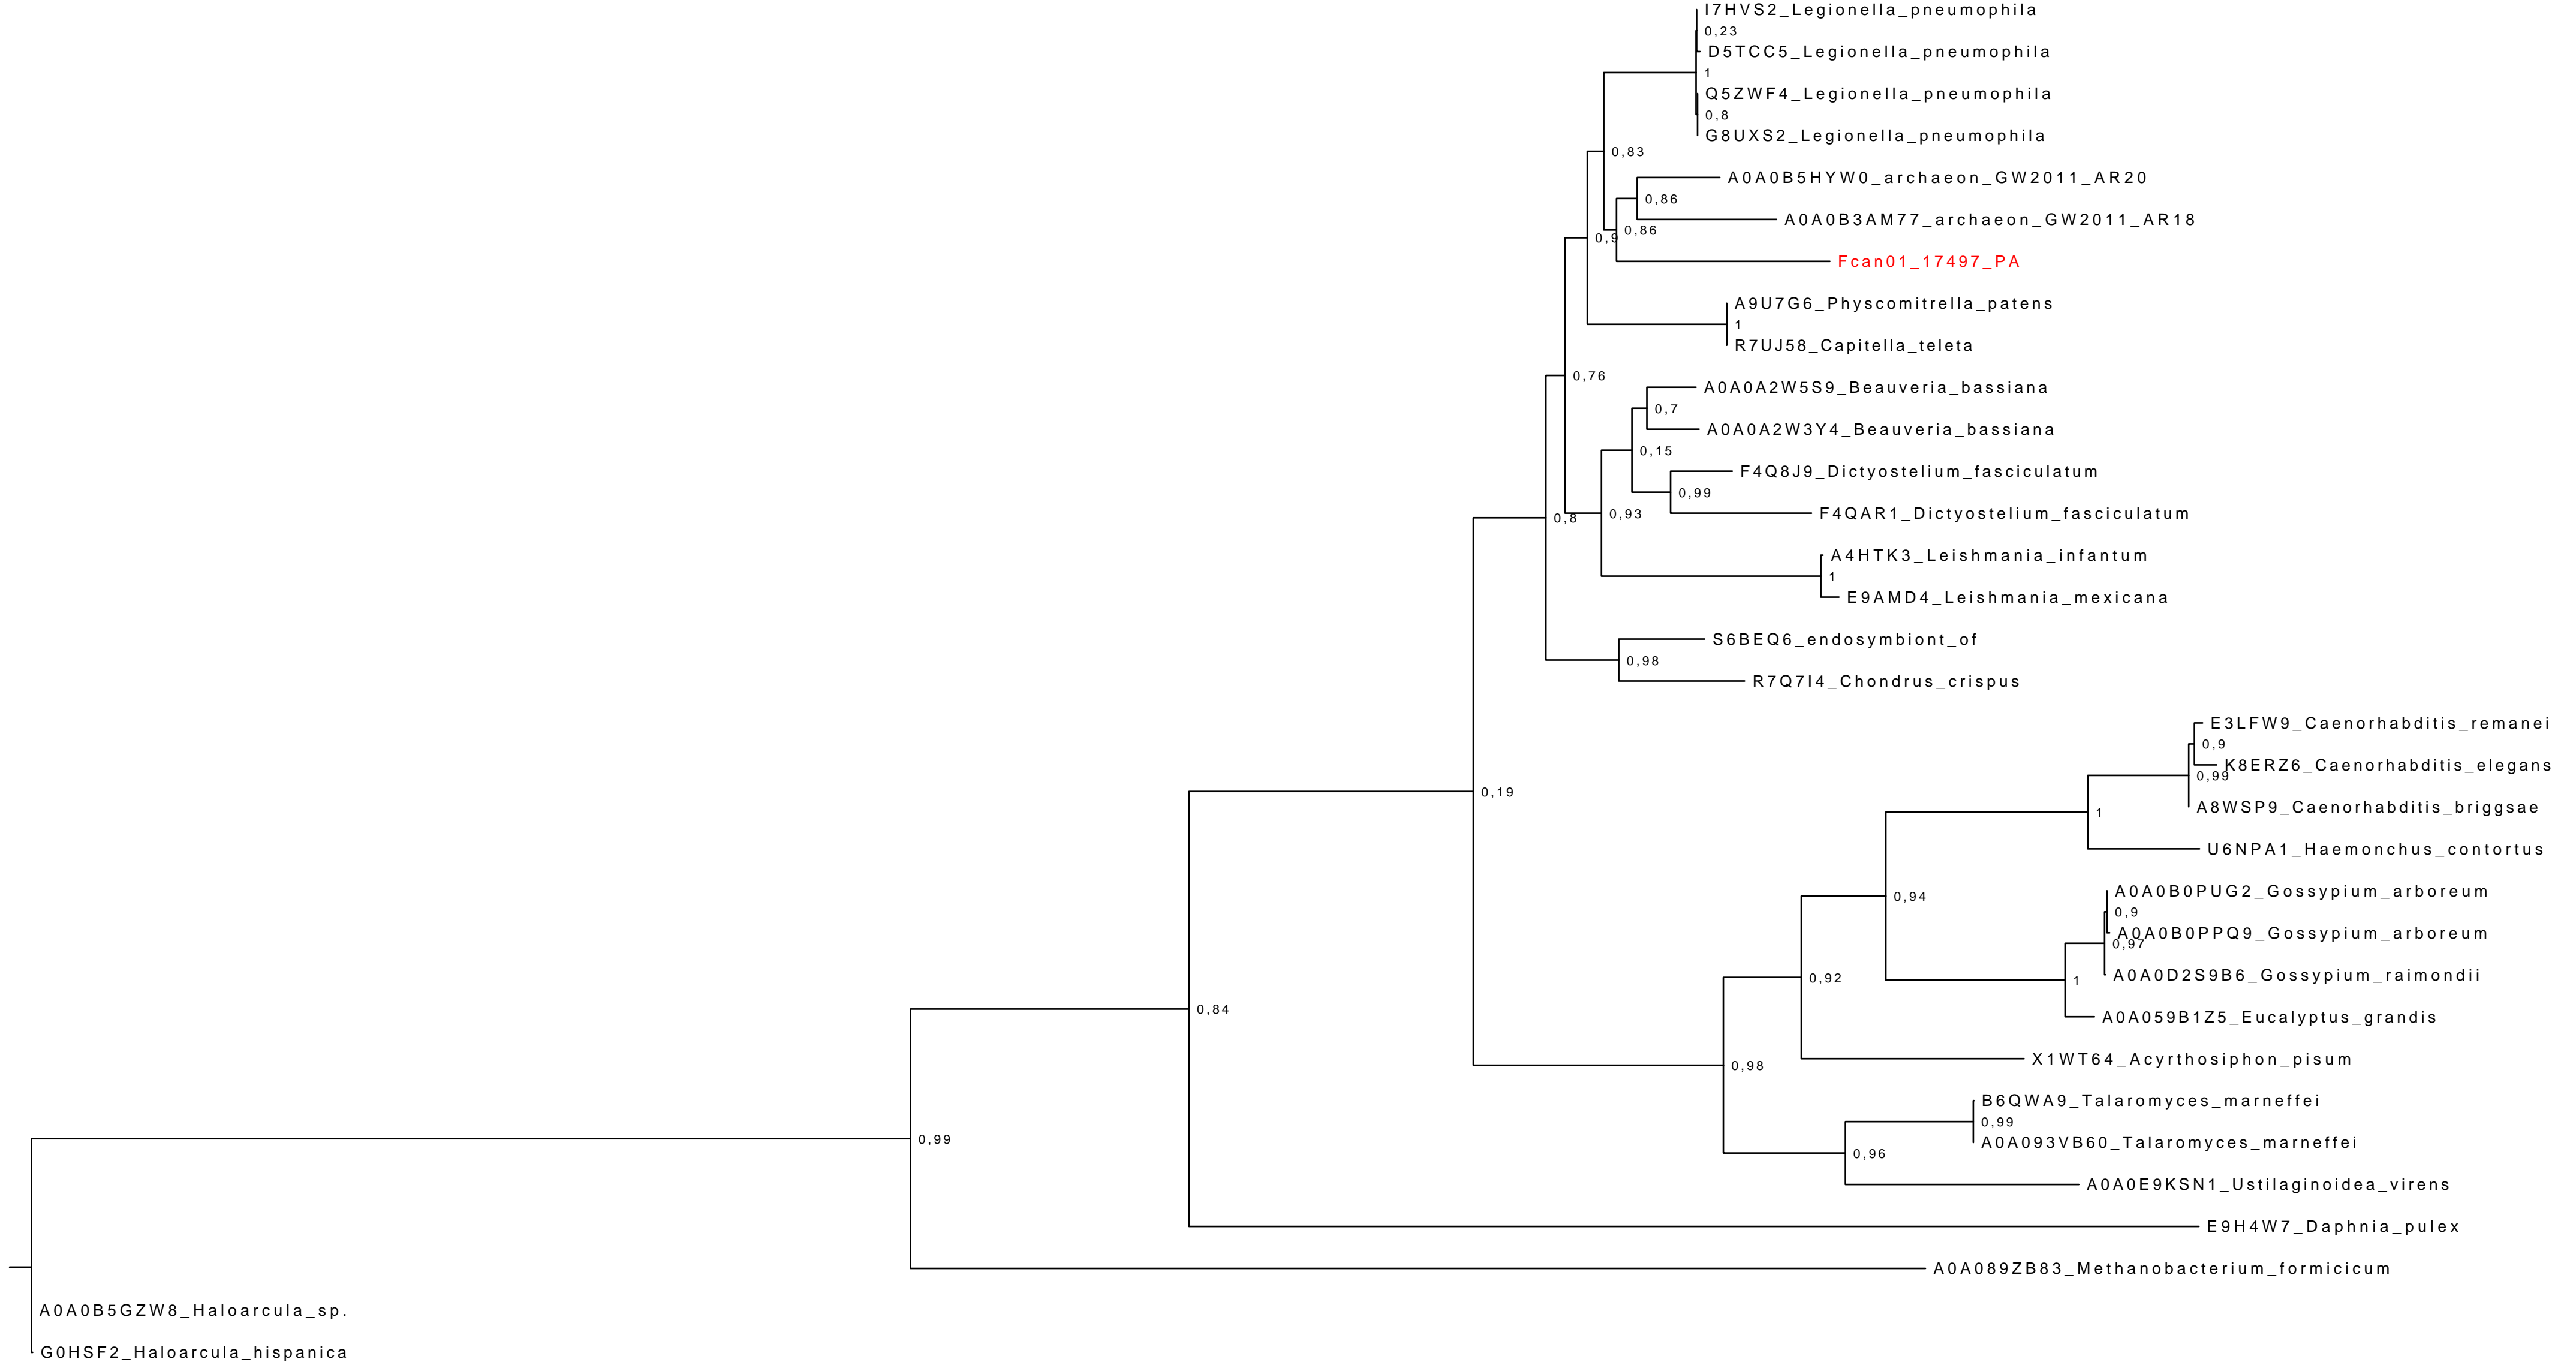

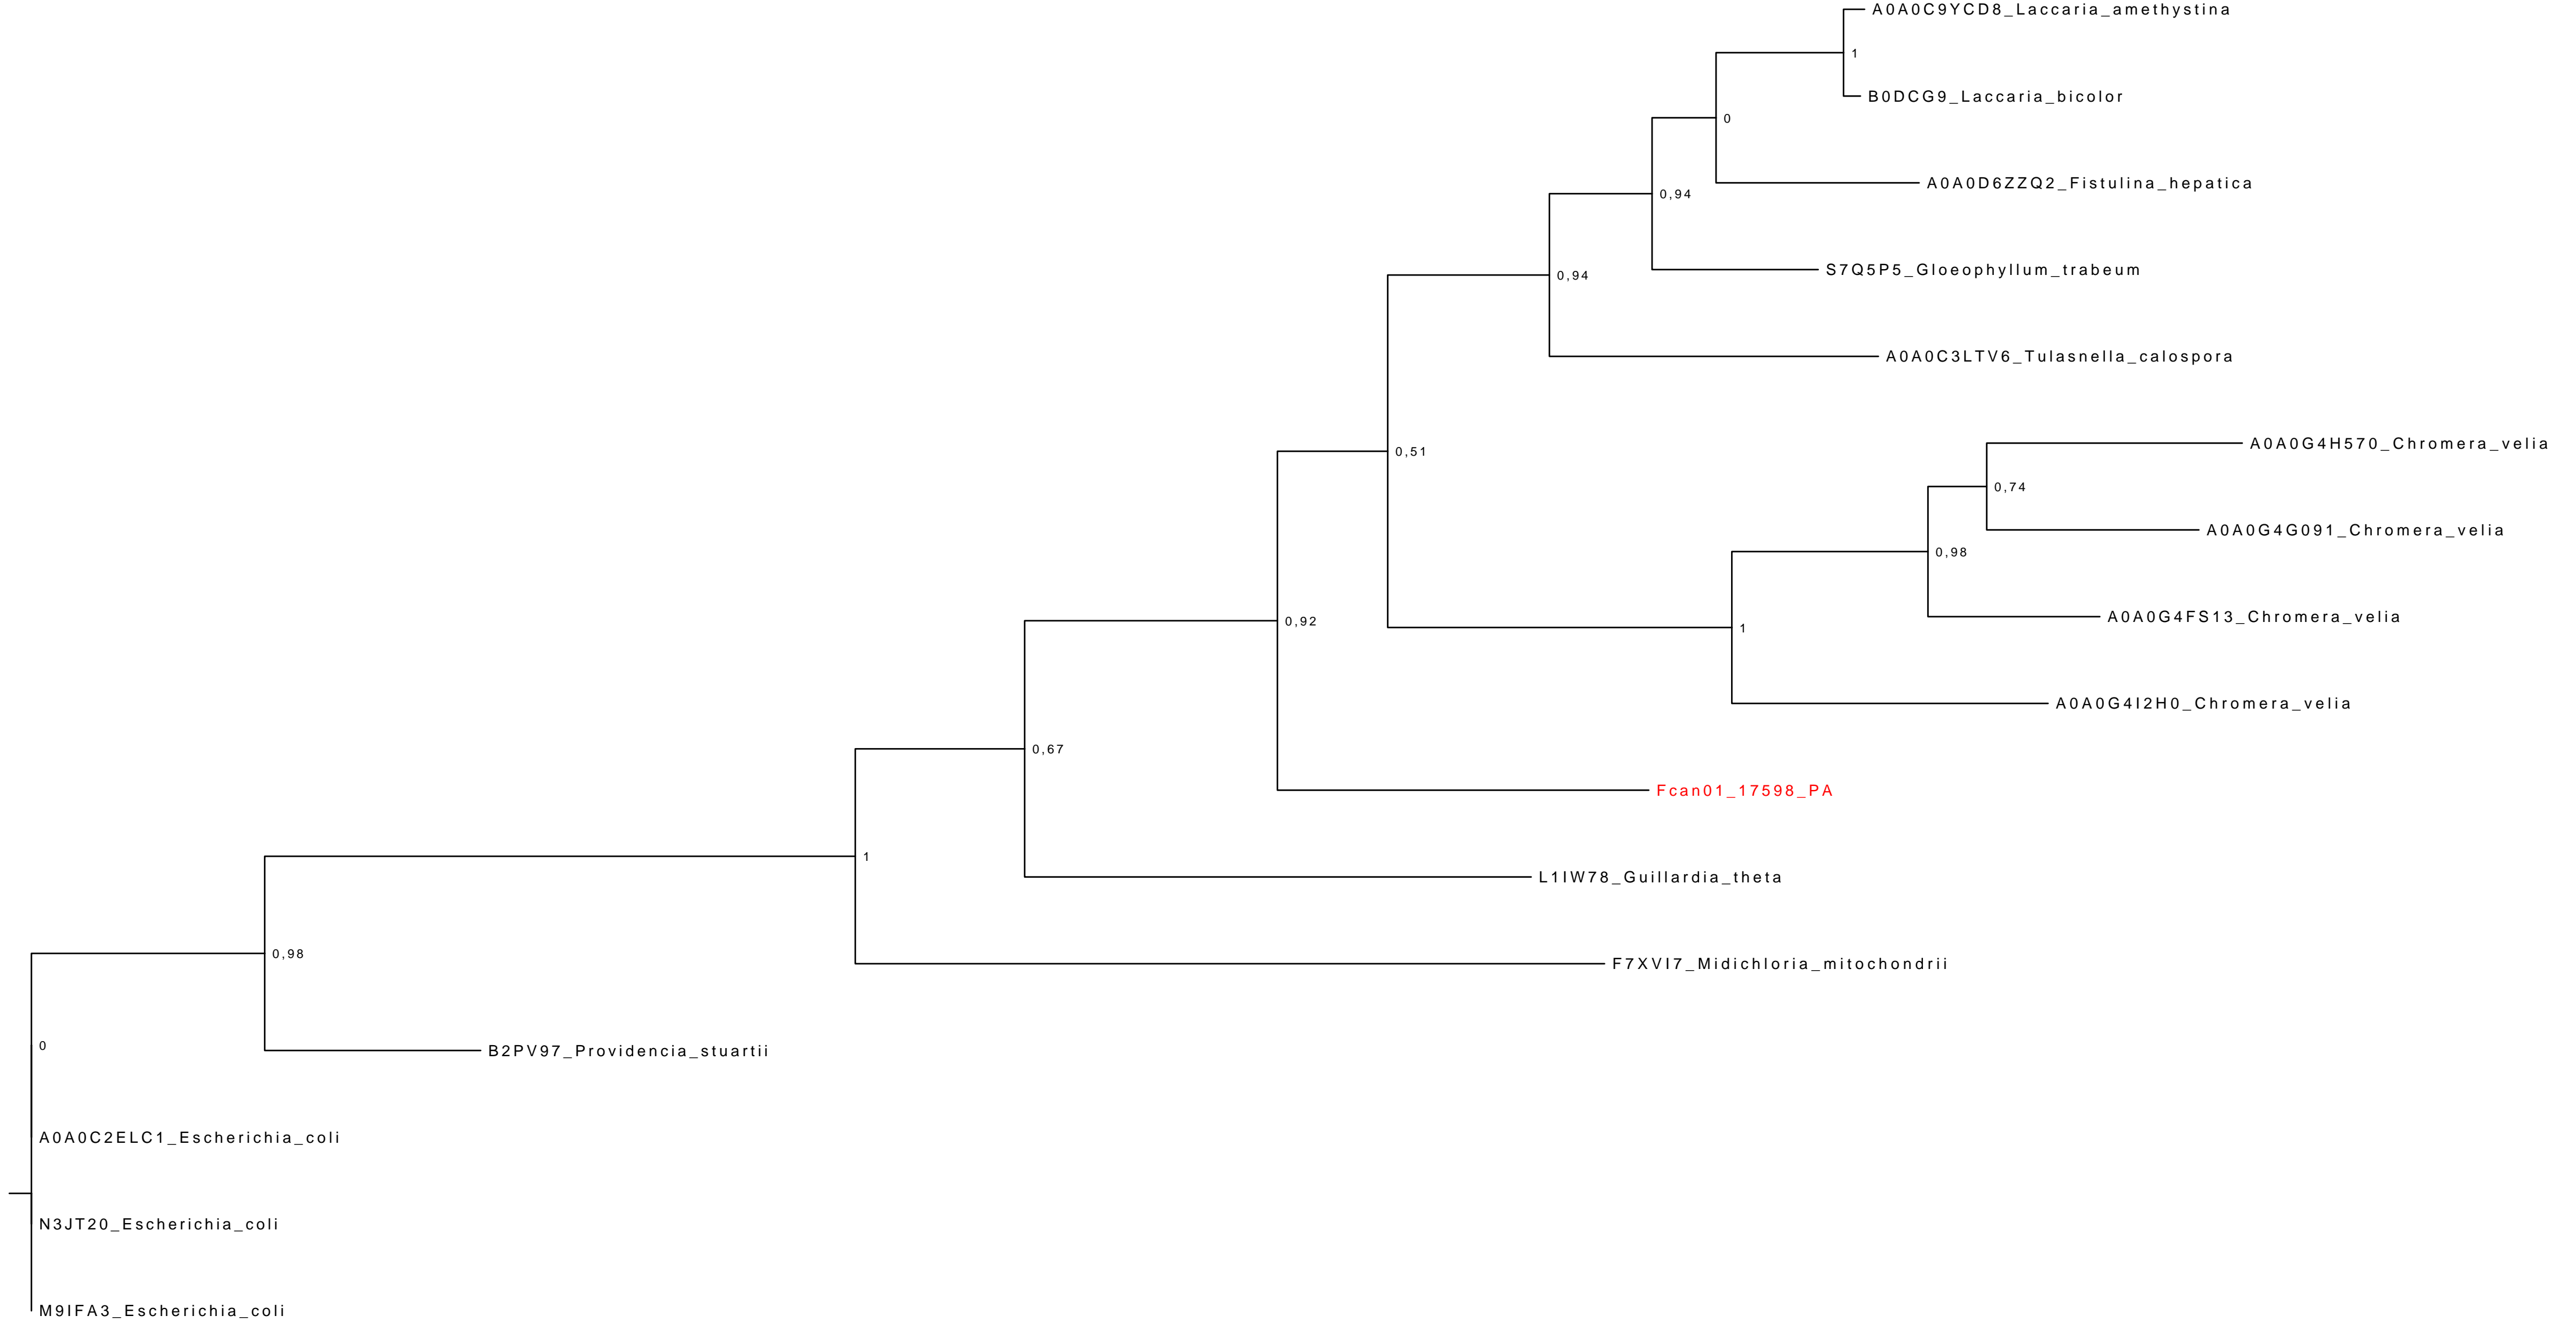

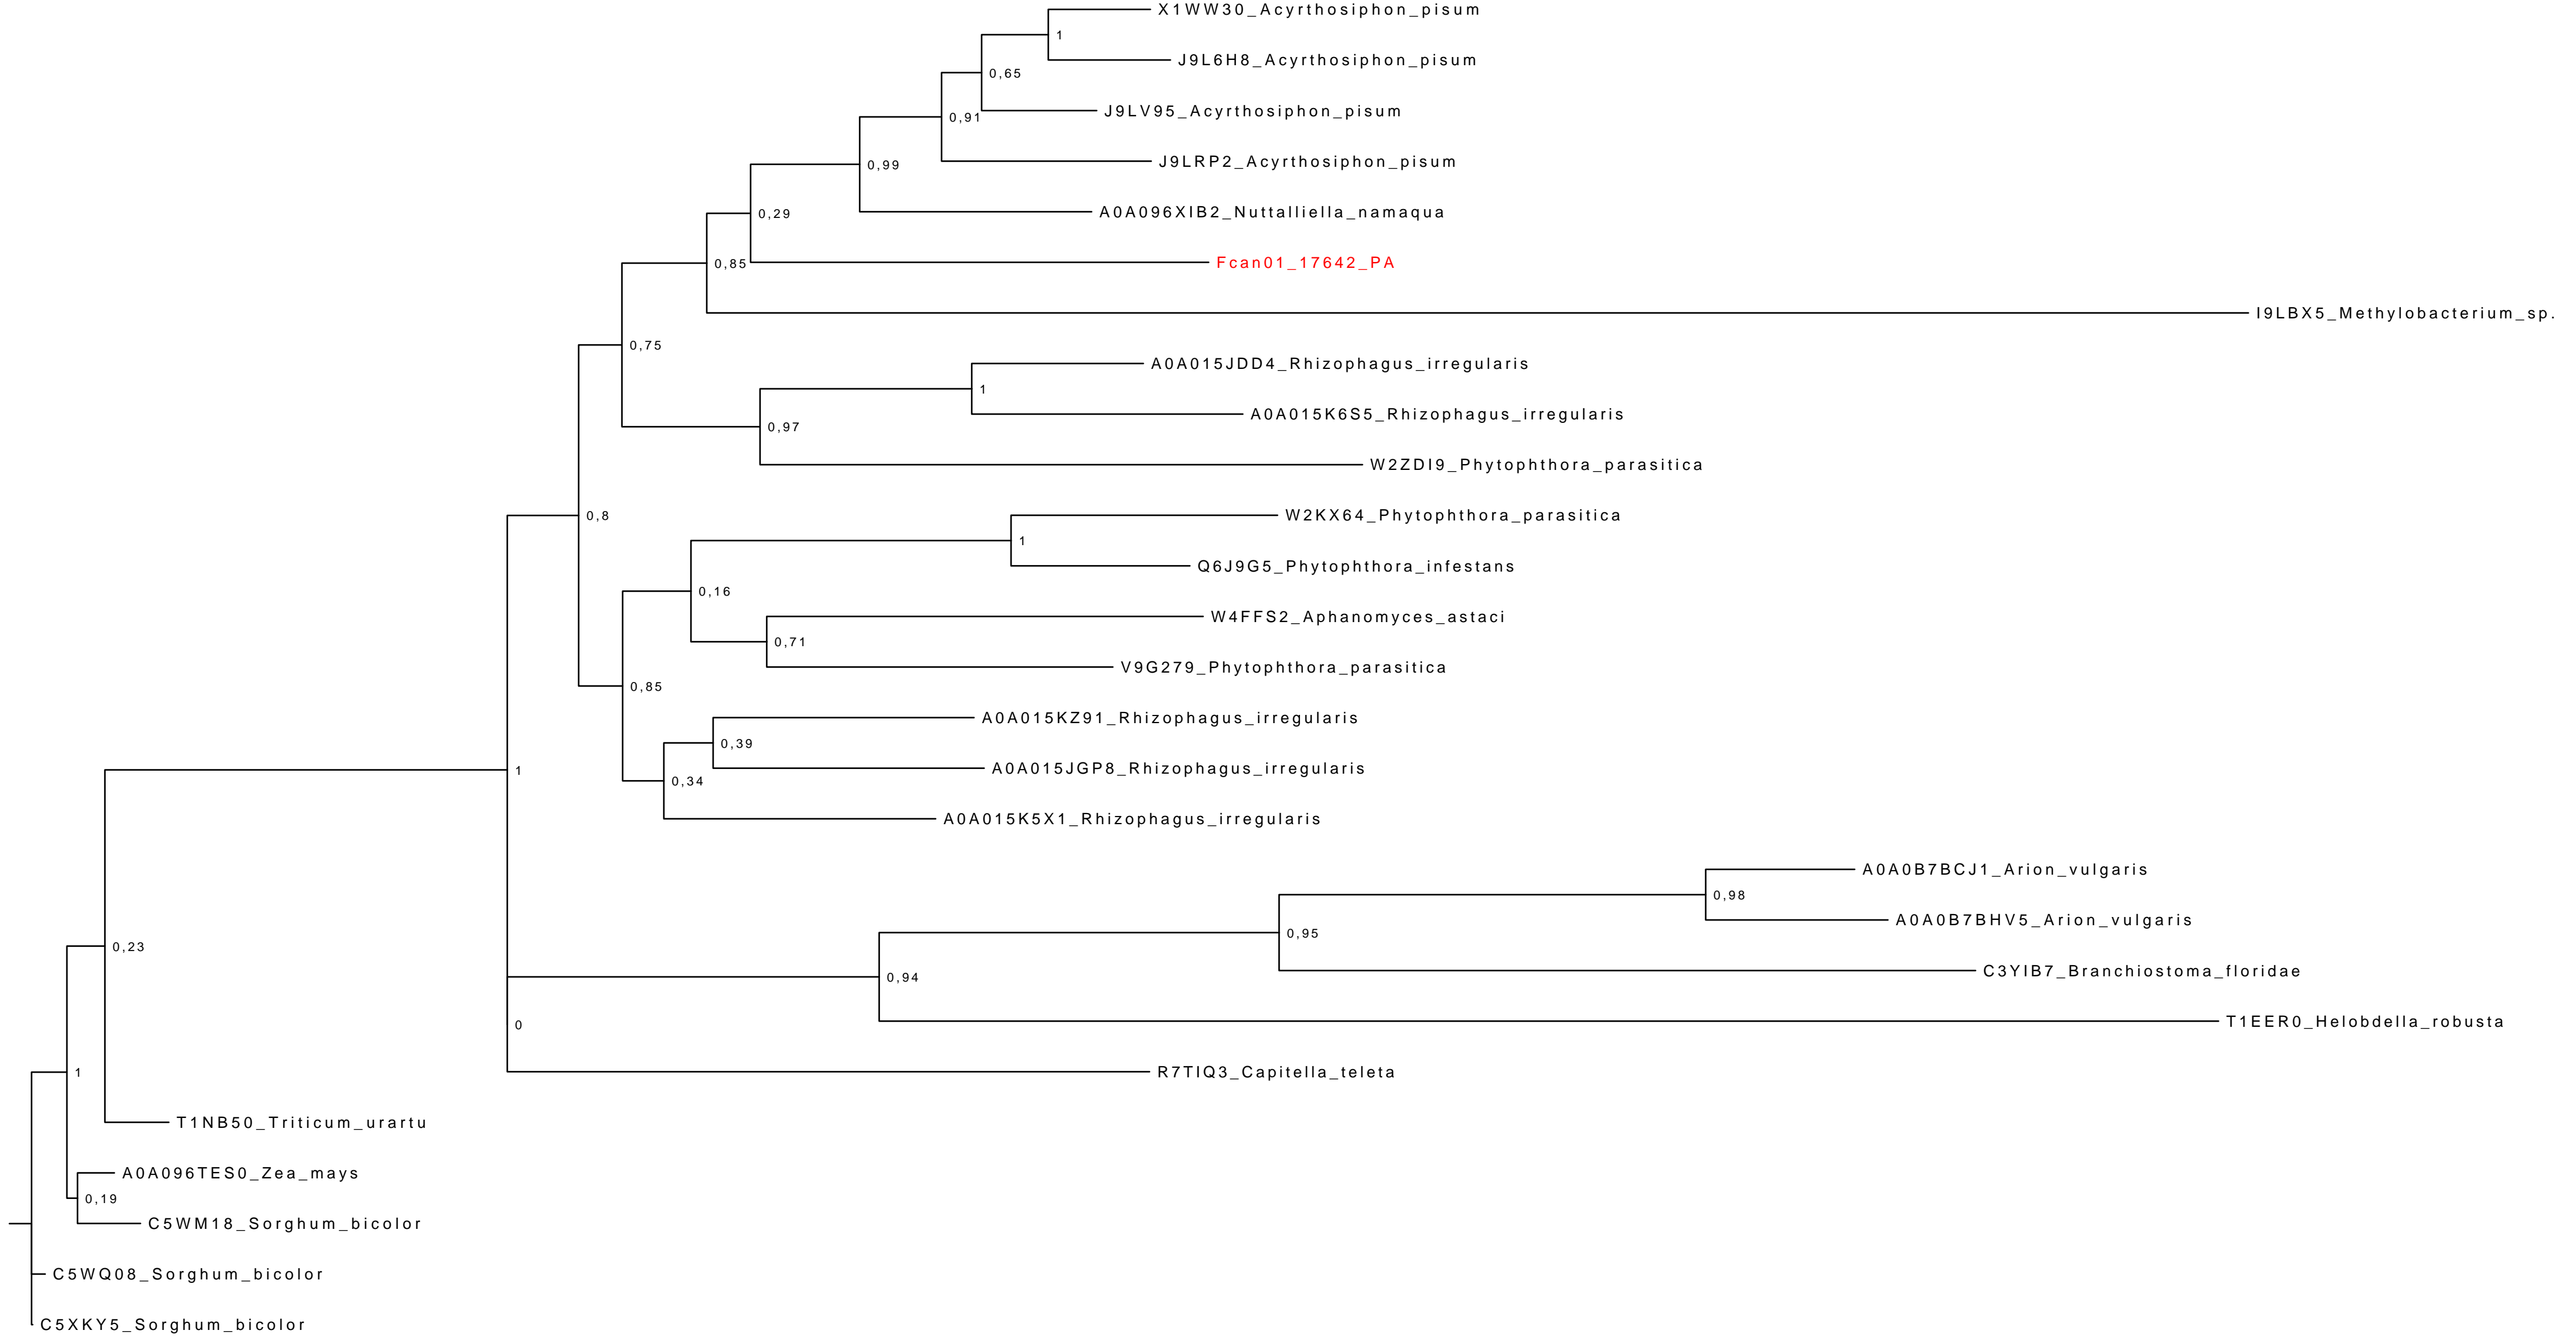

0.7

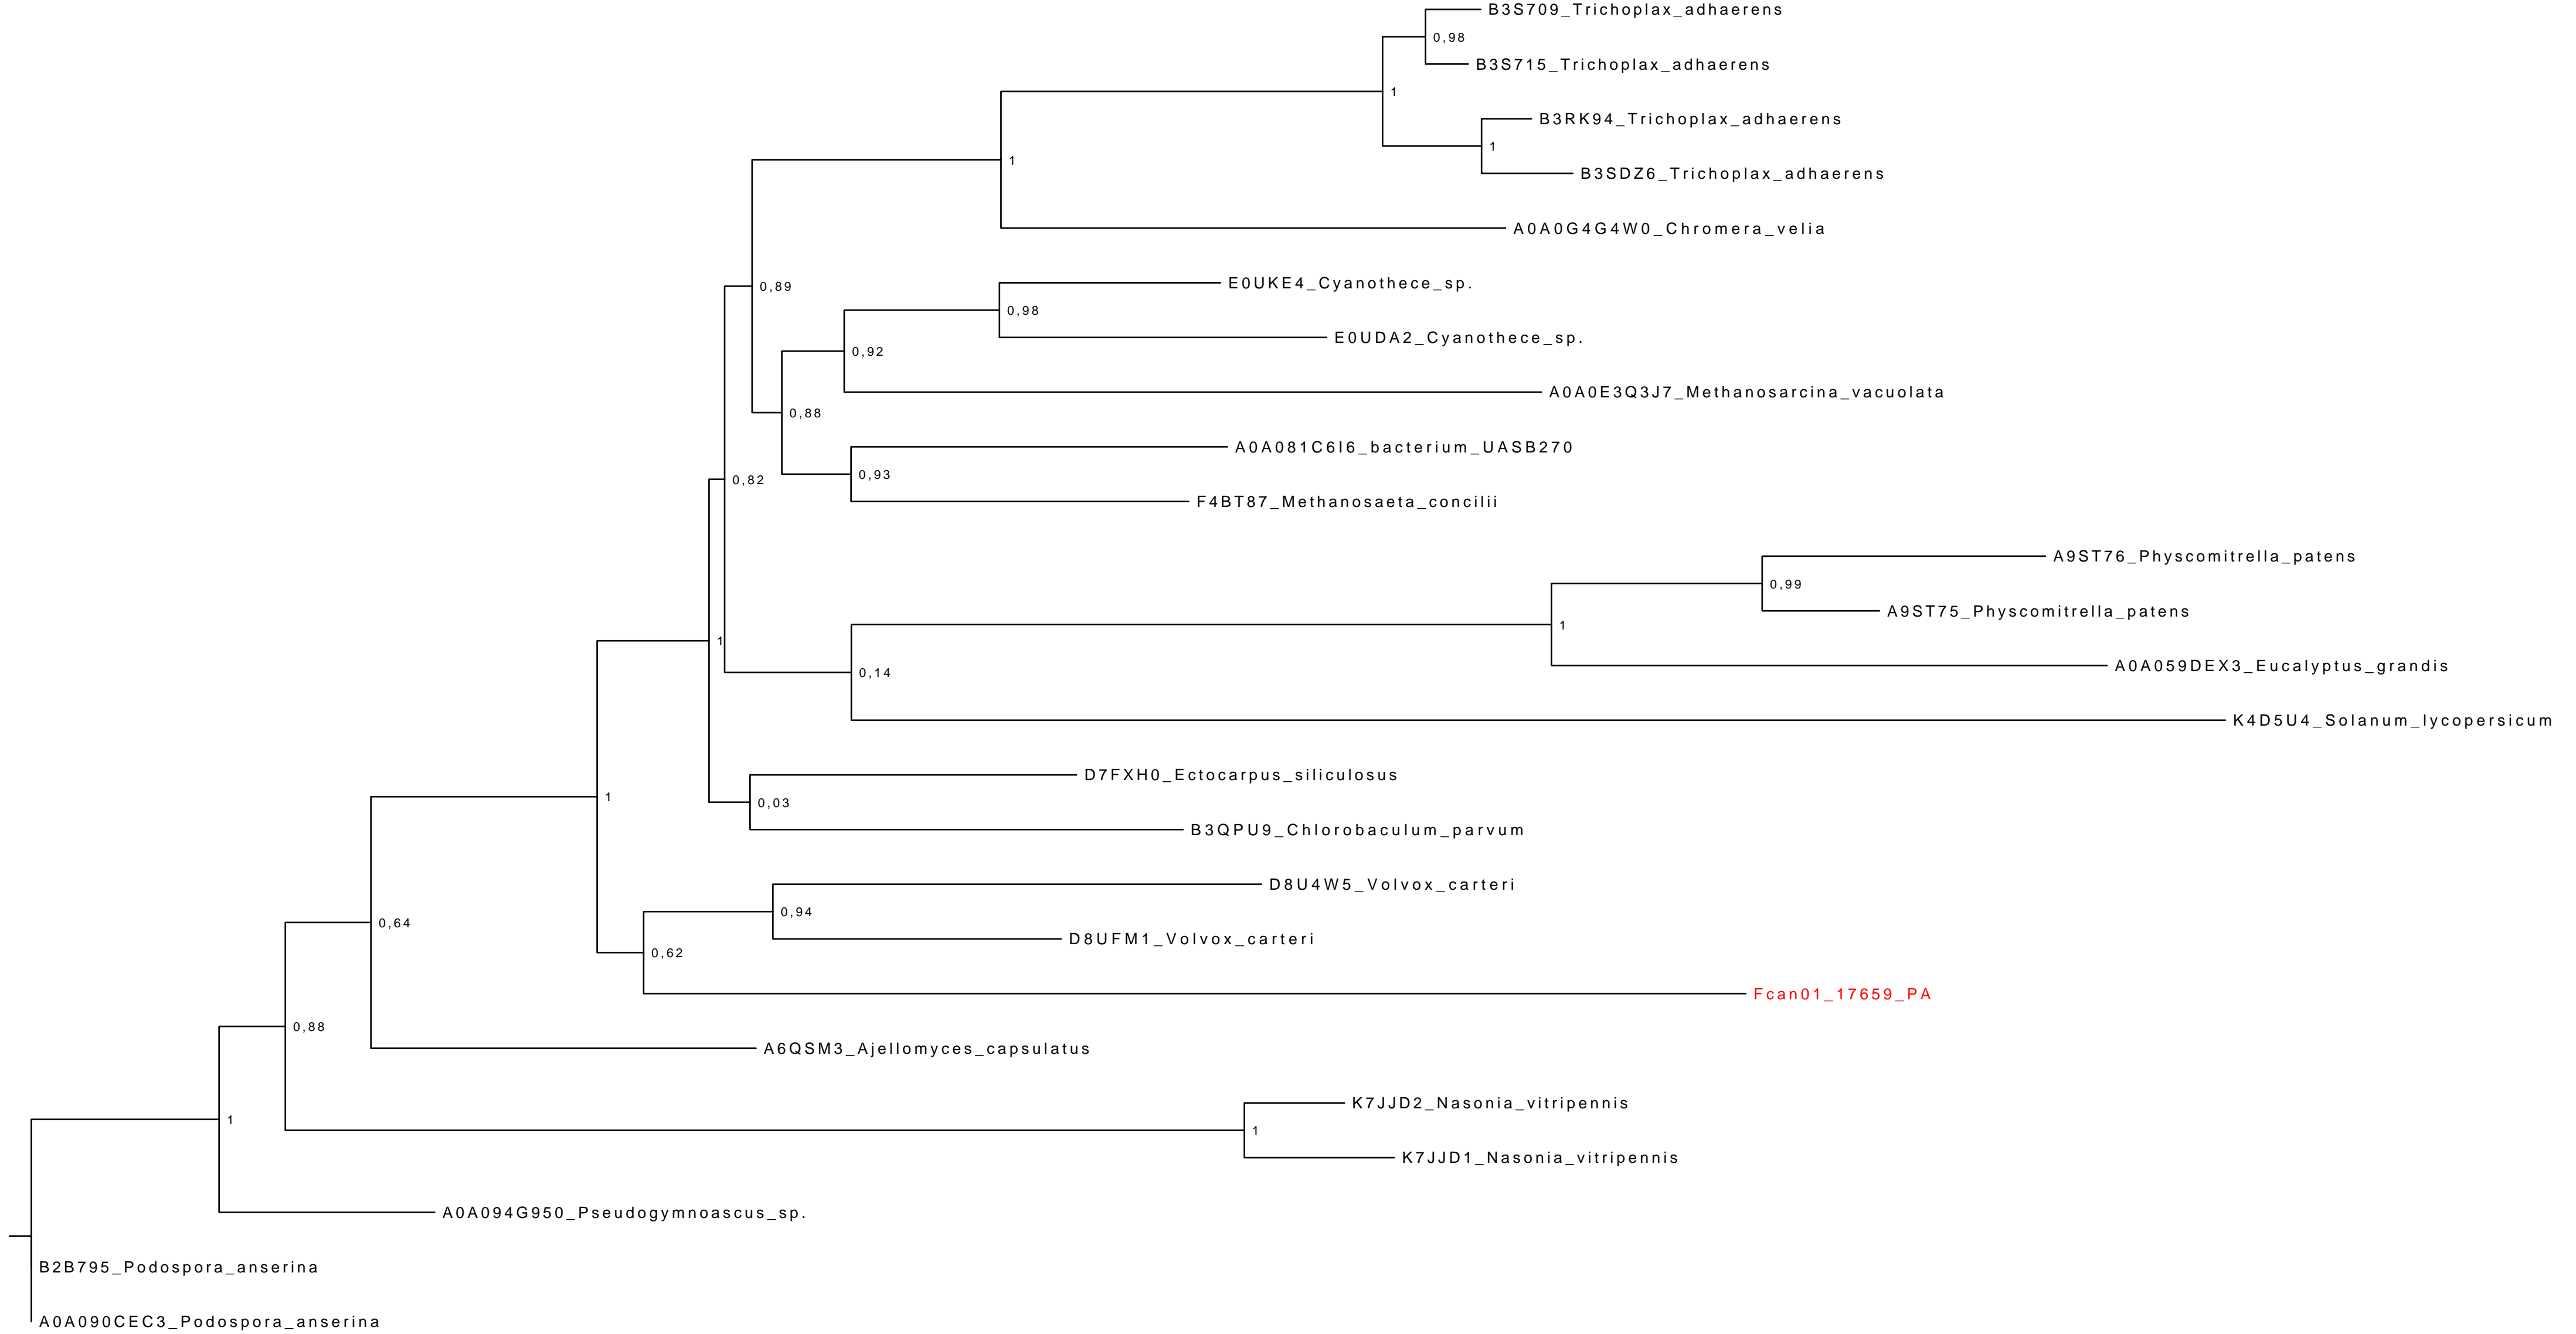



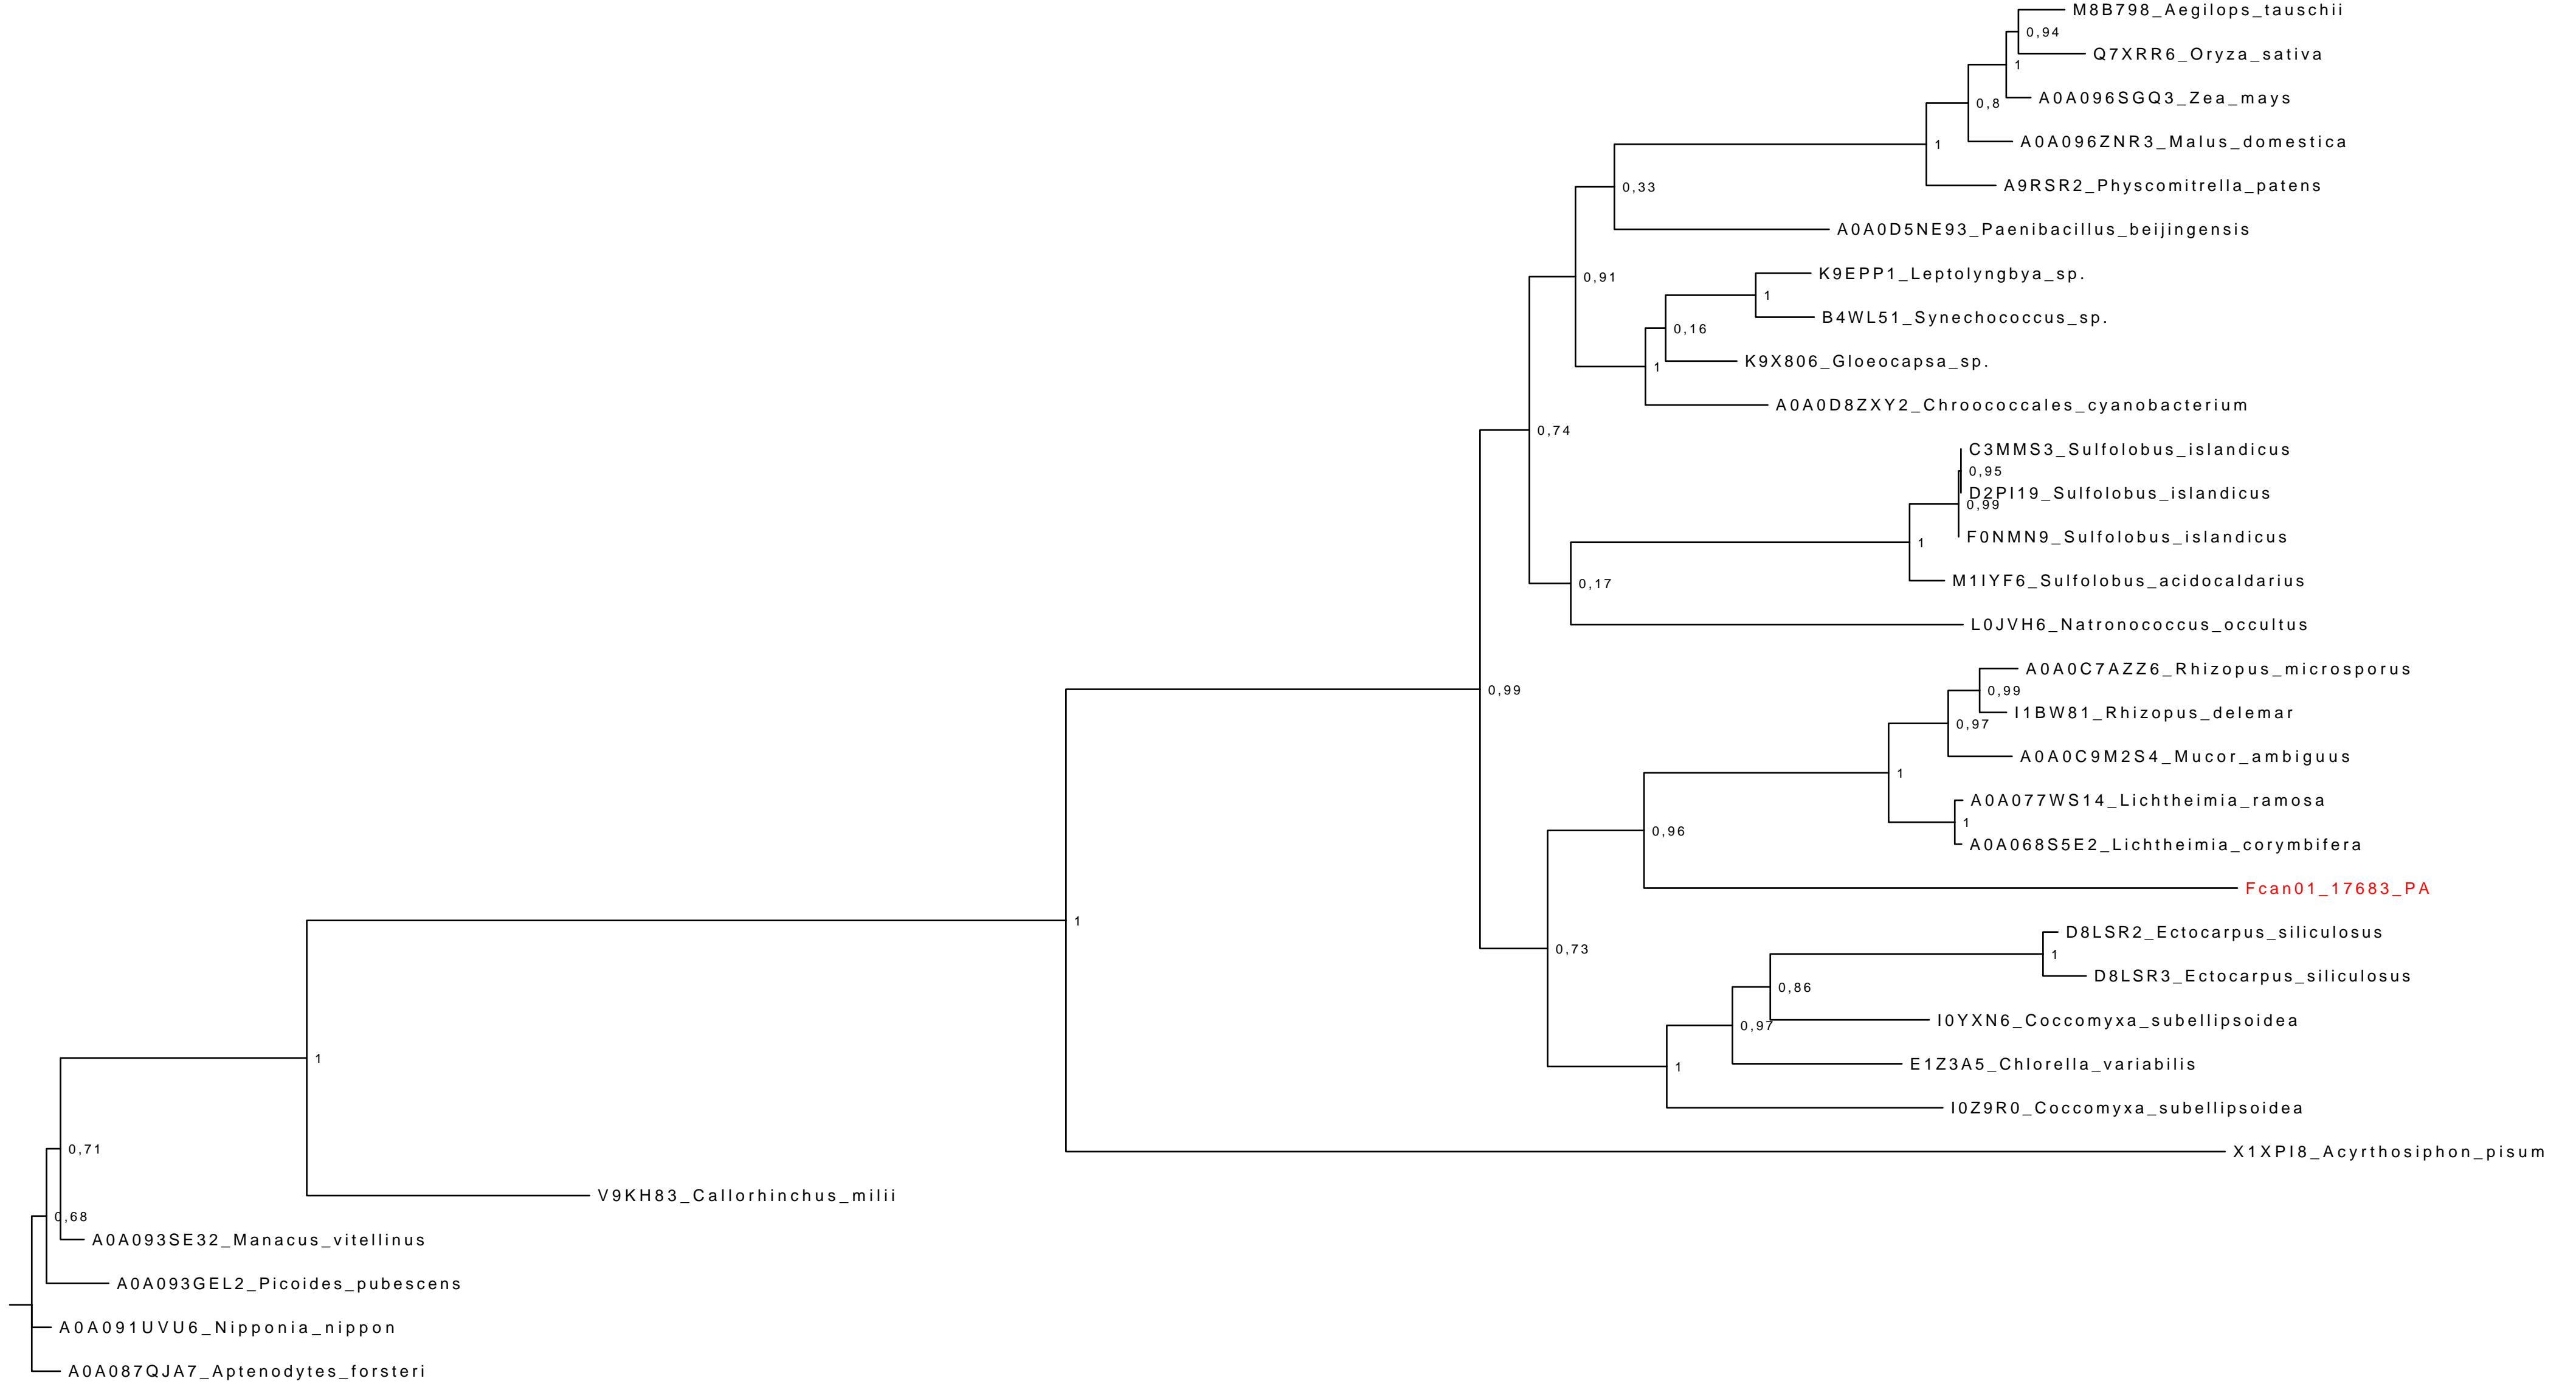

0.5



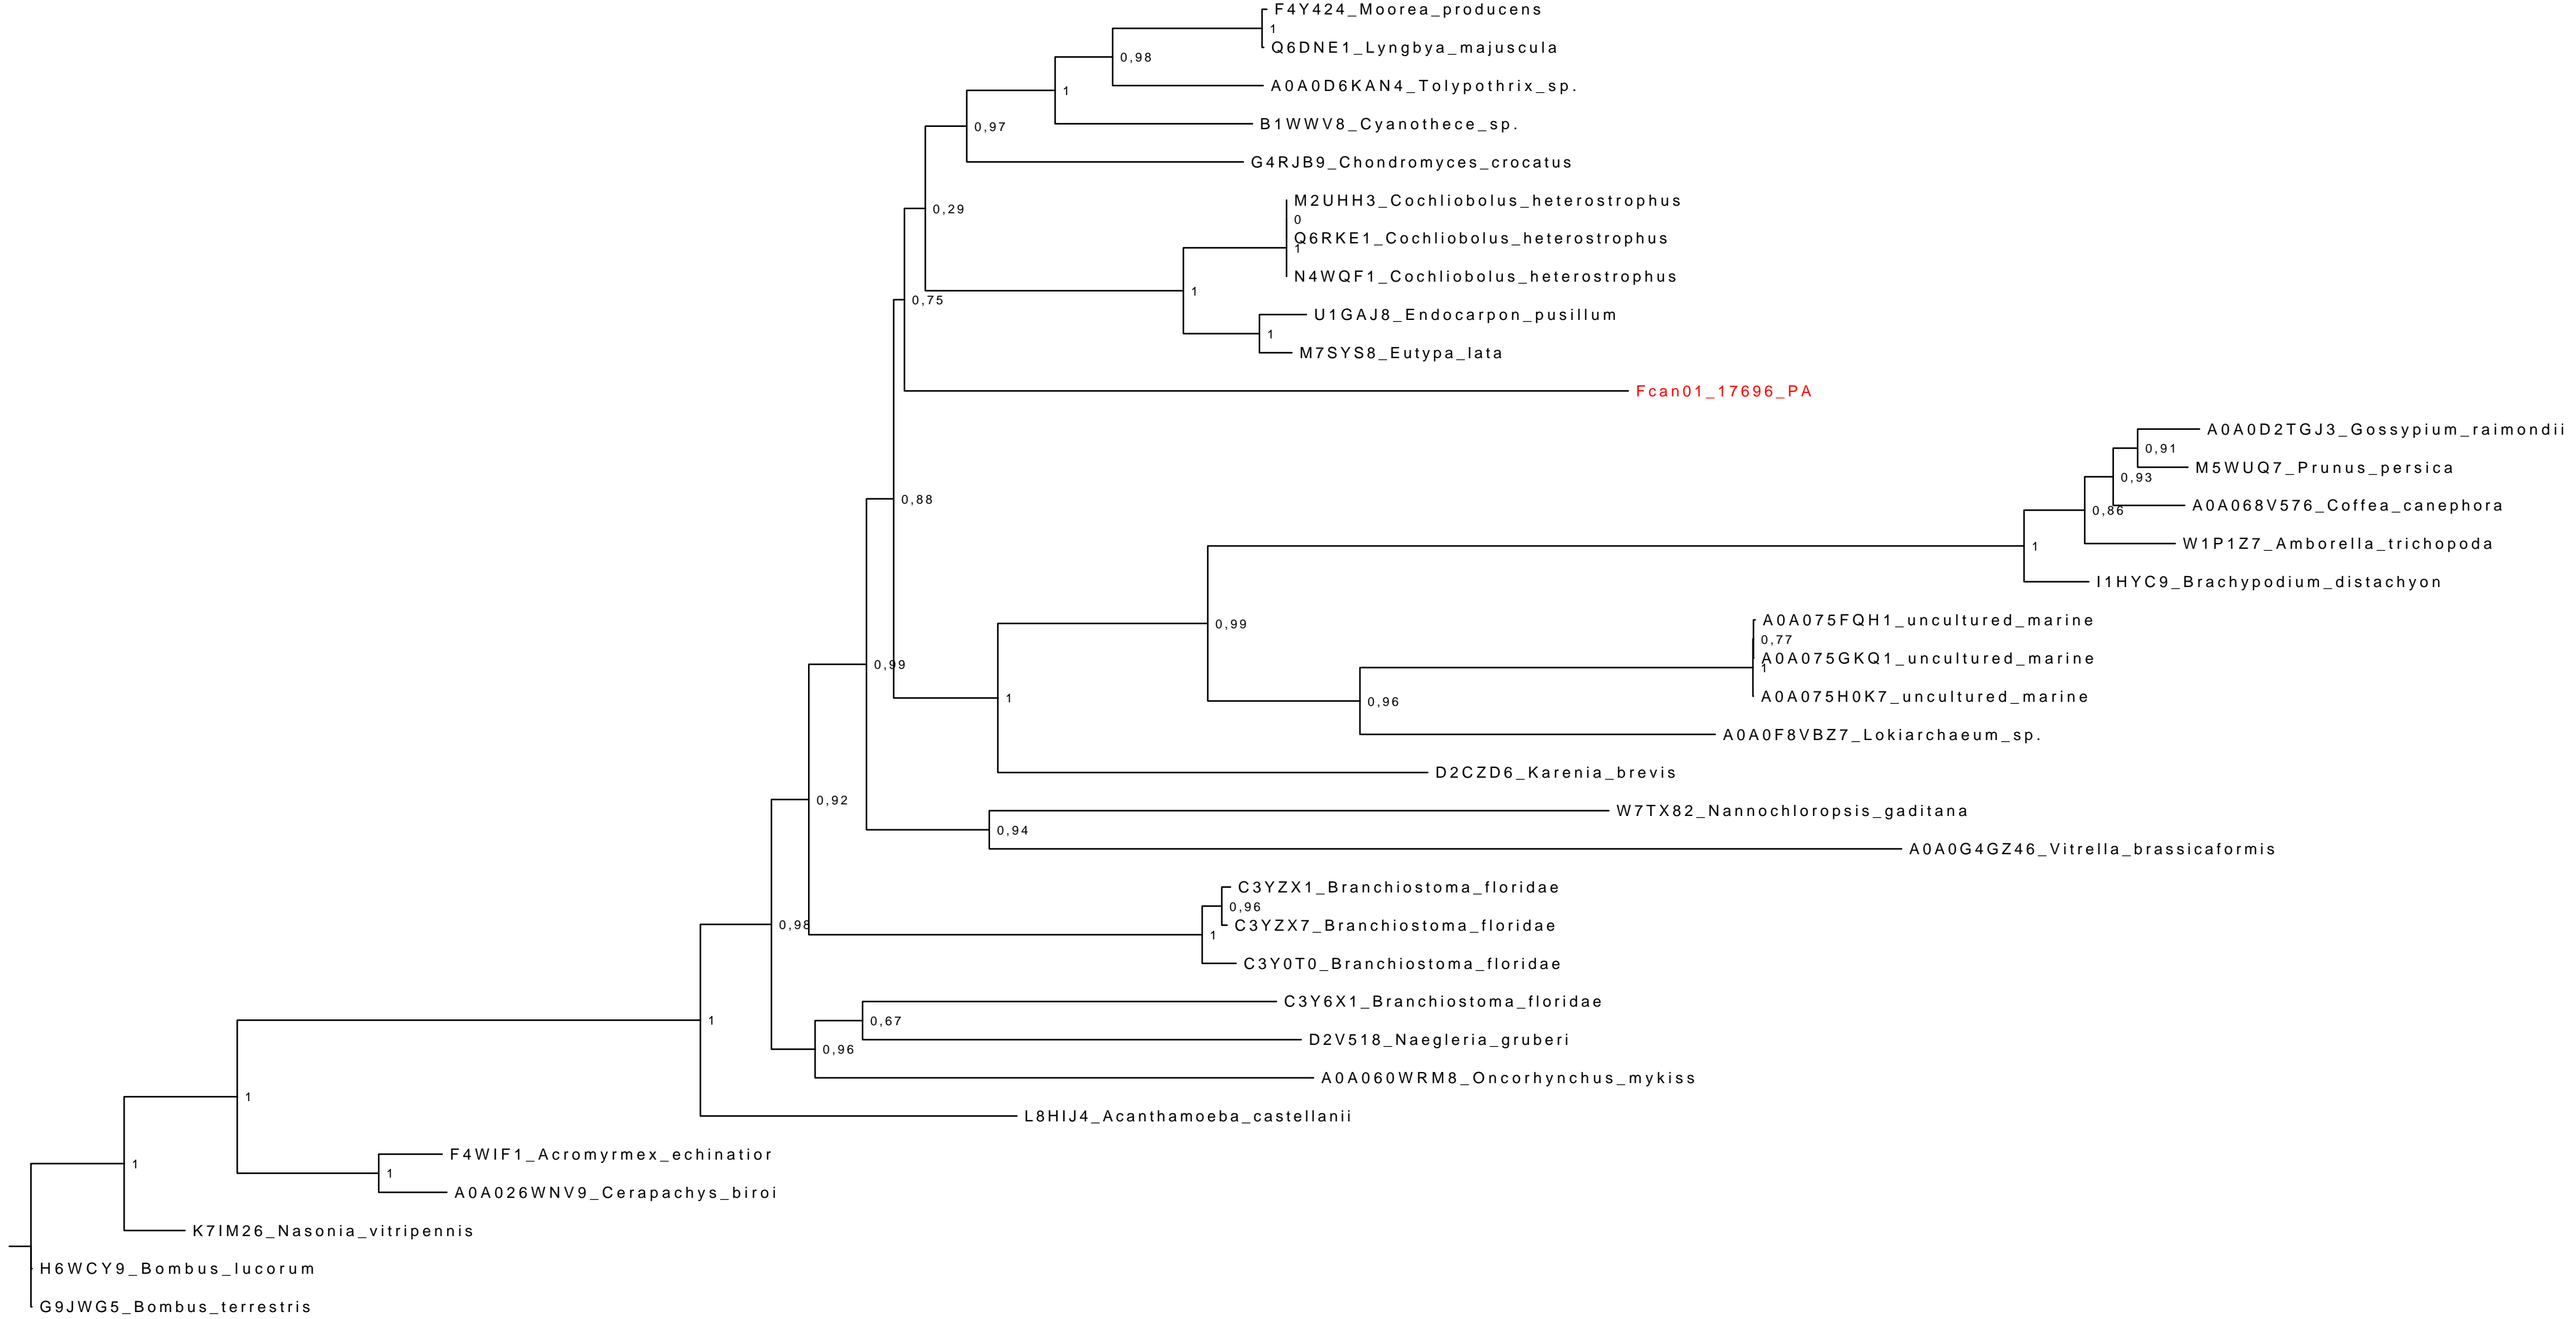

0.7

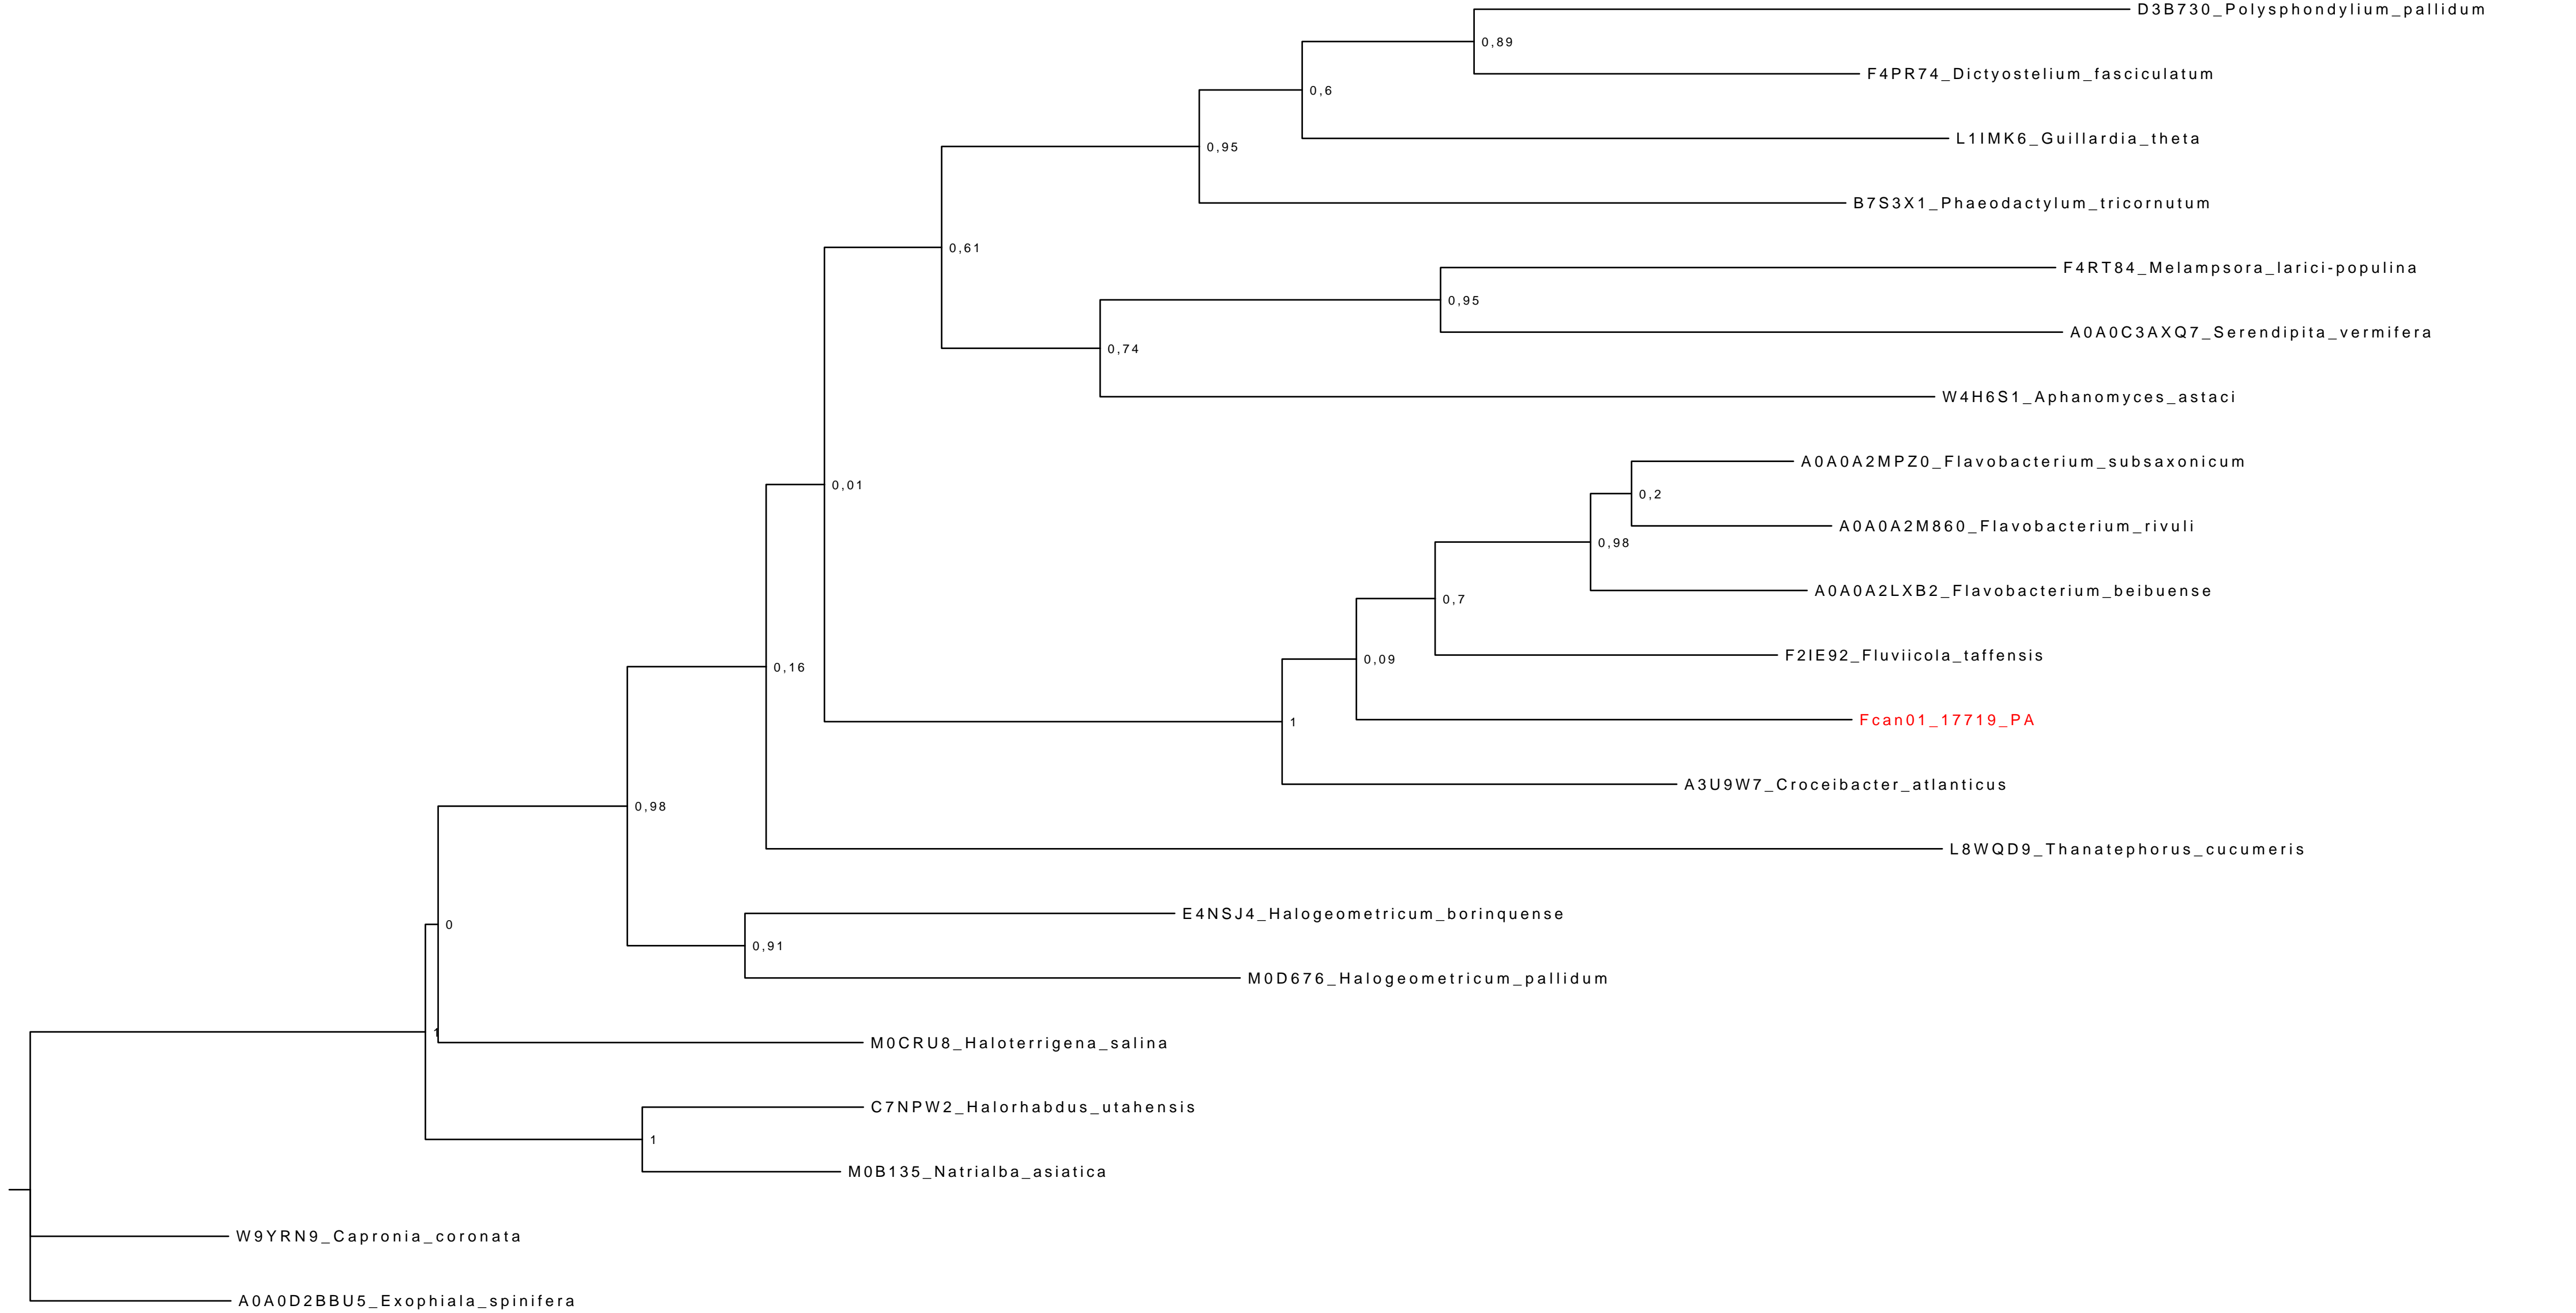

0.4

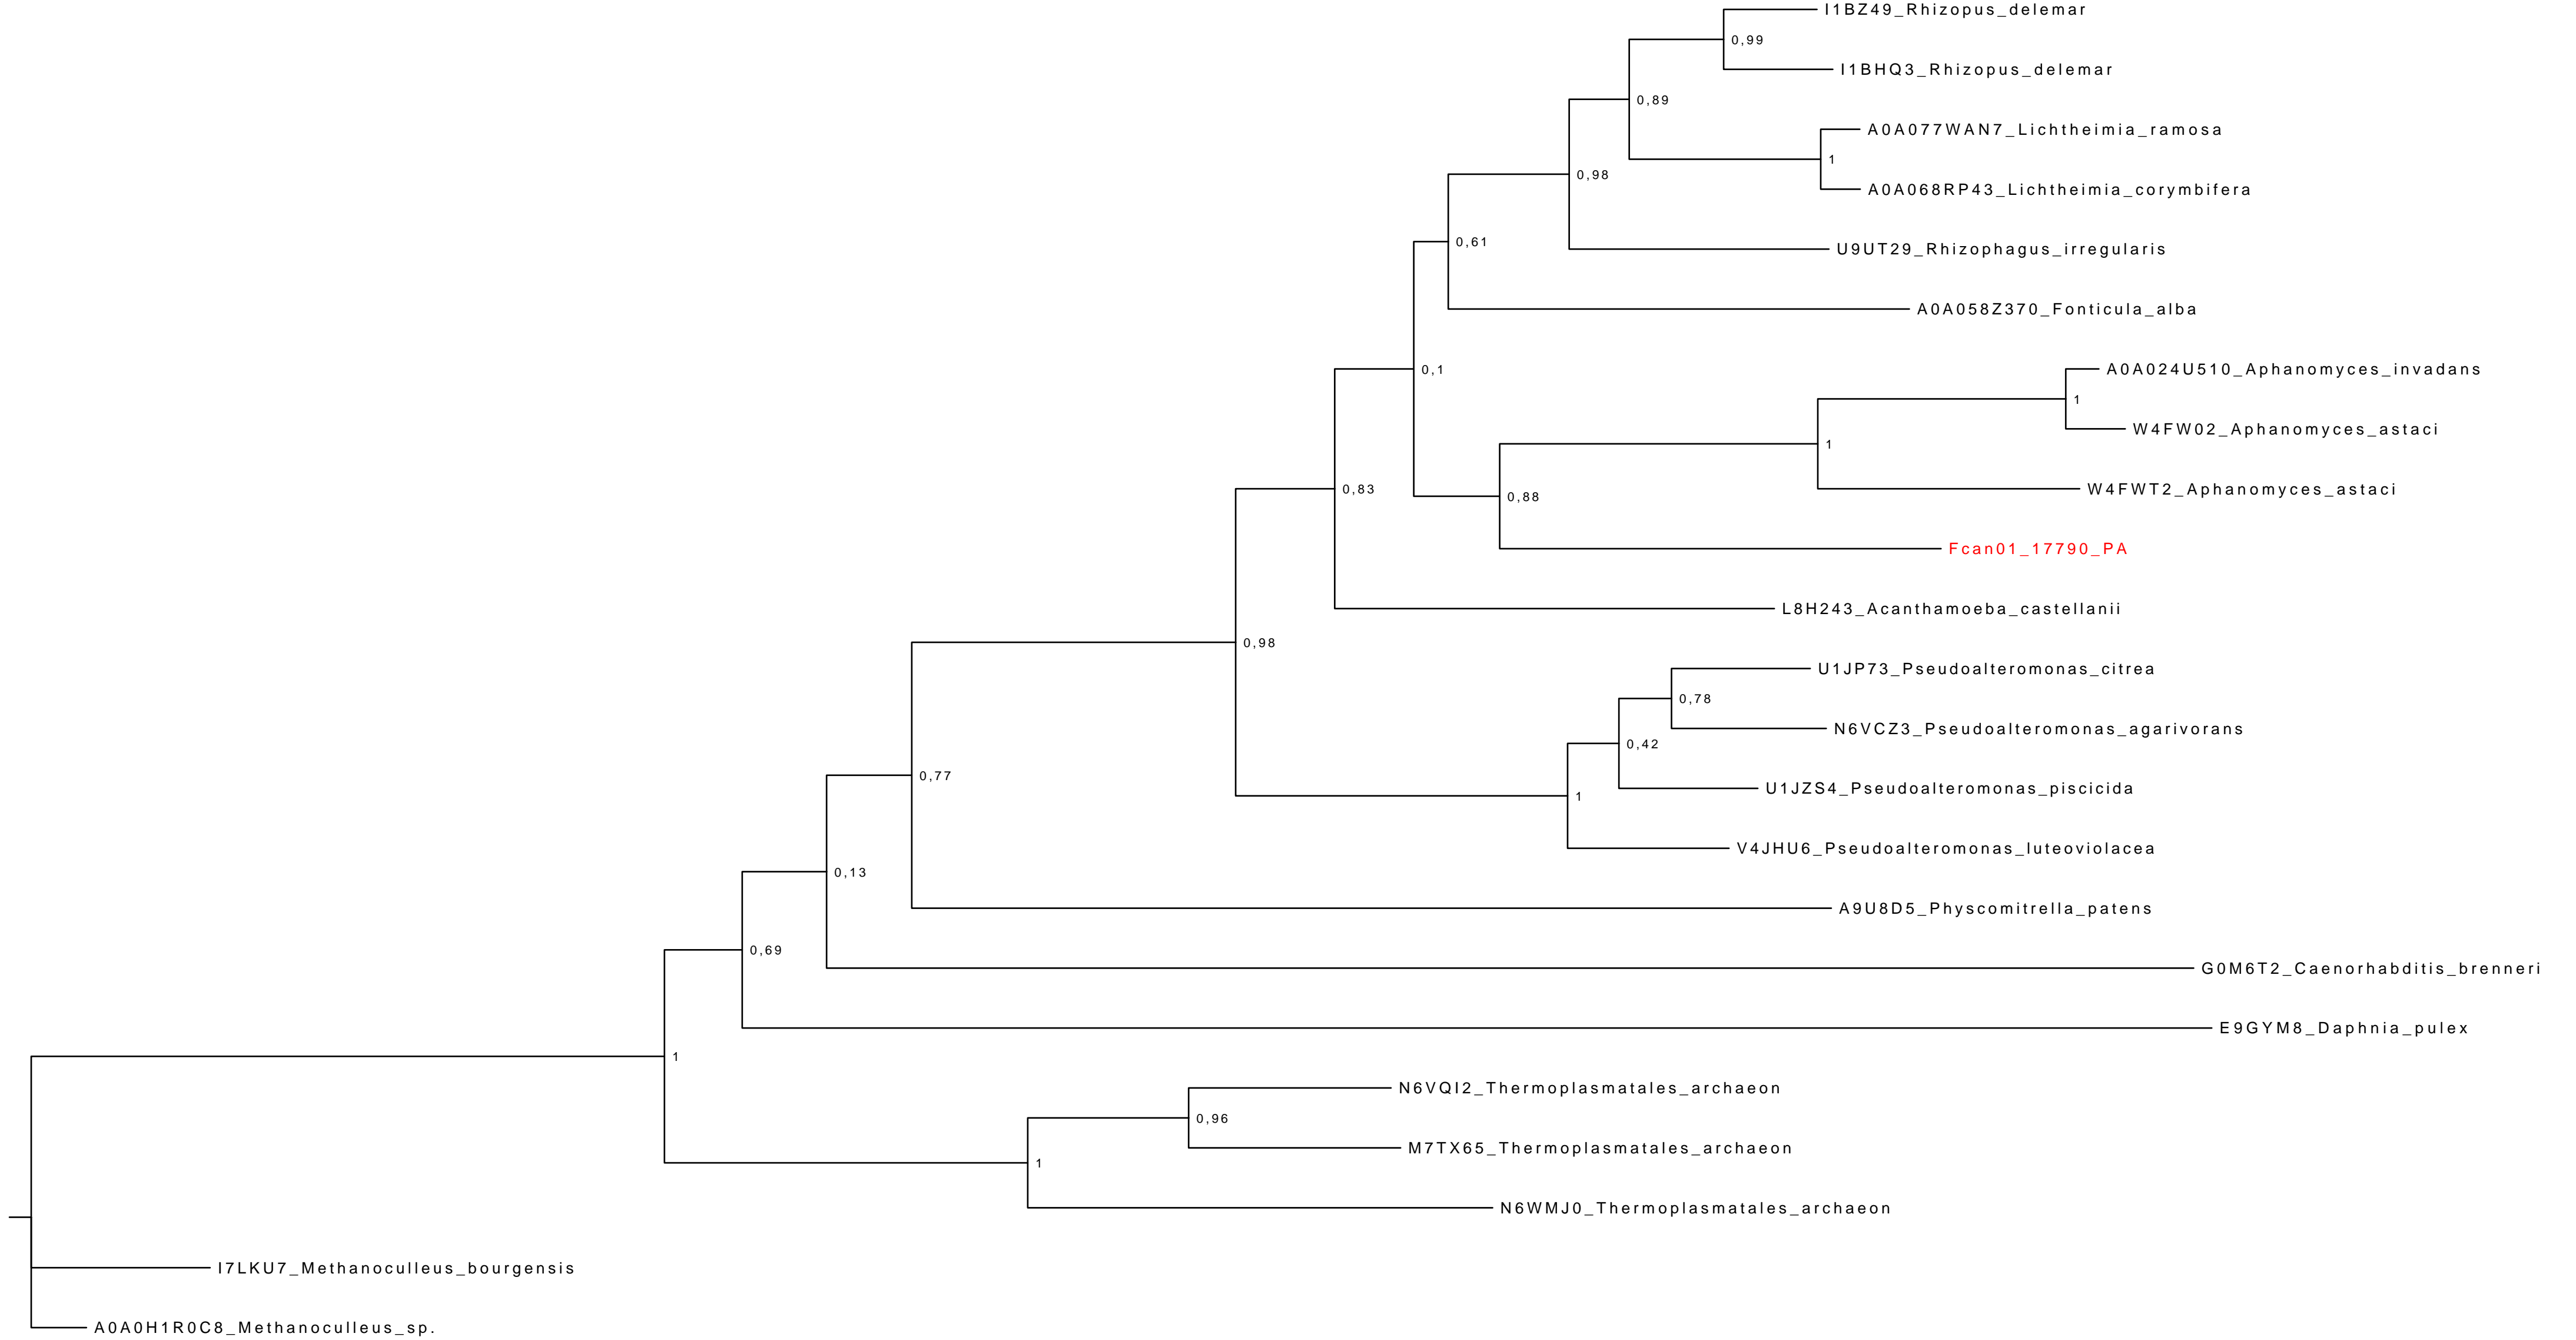

0.4

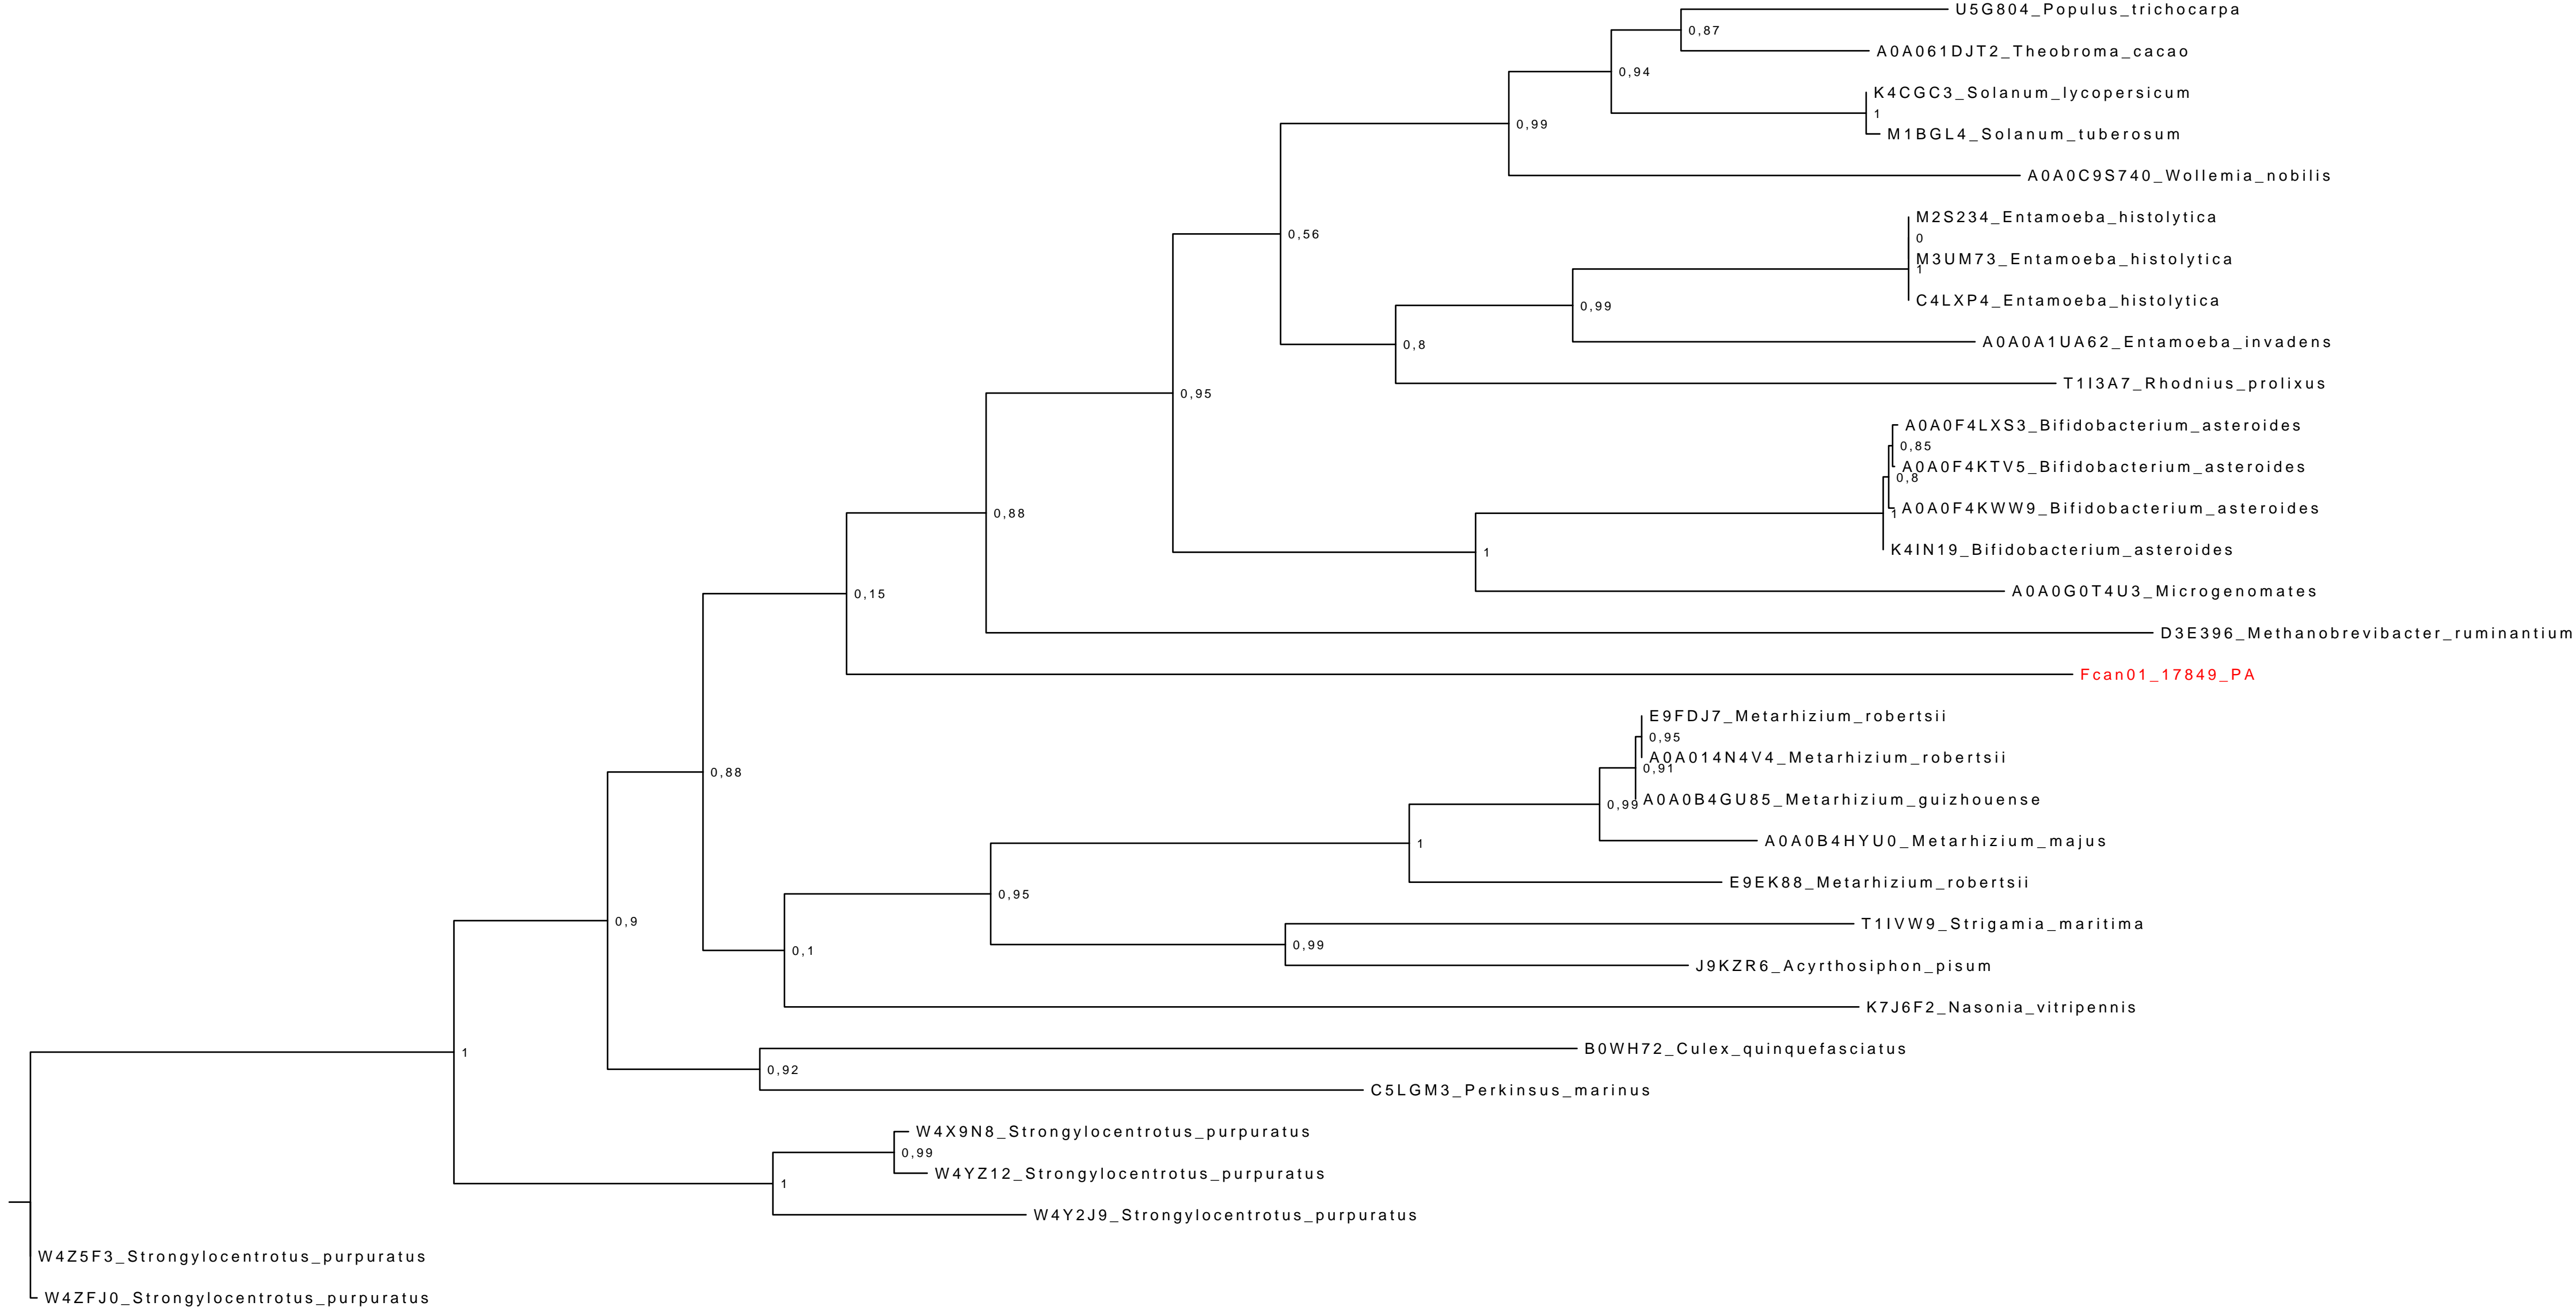

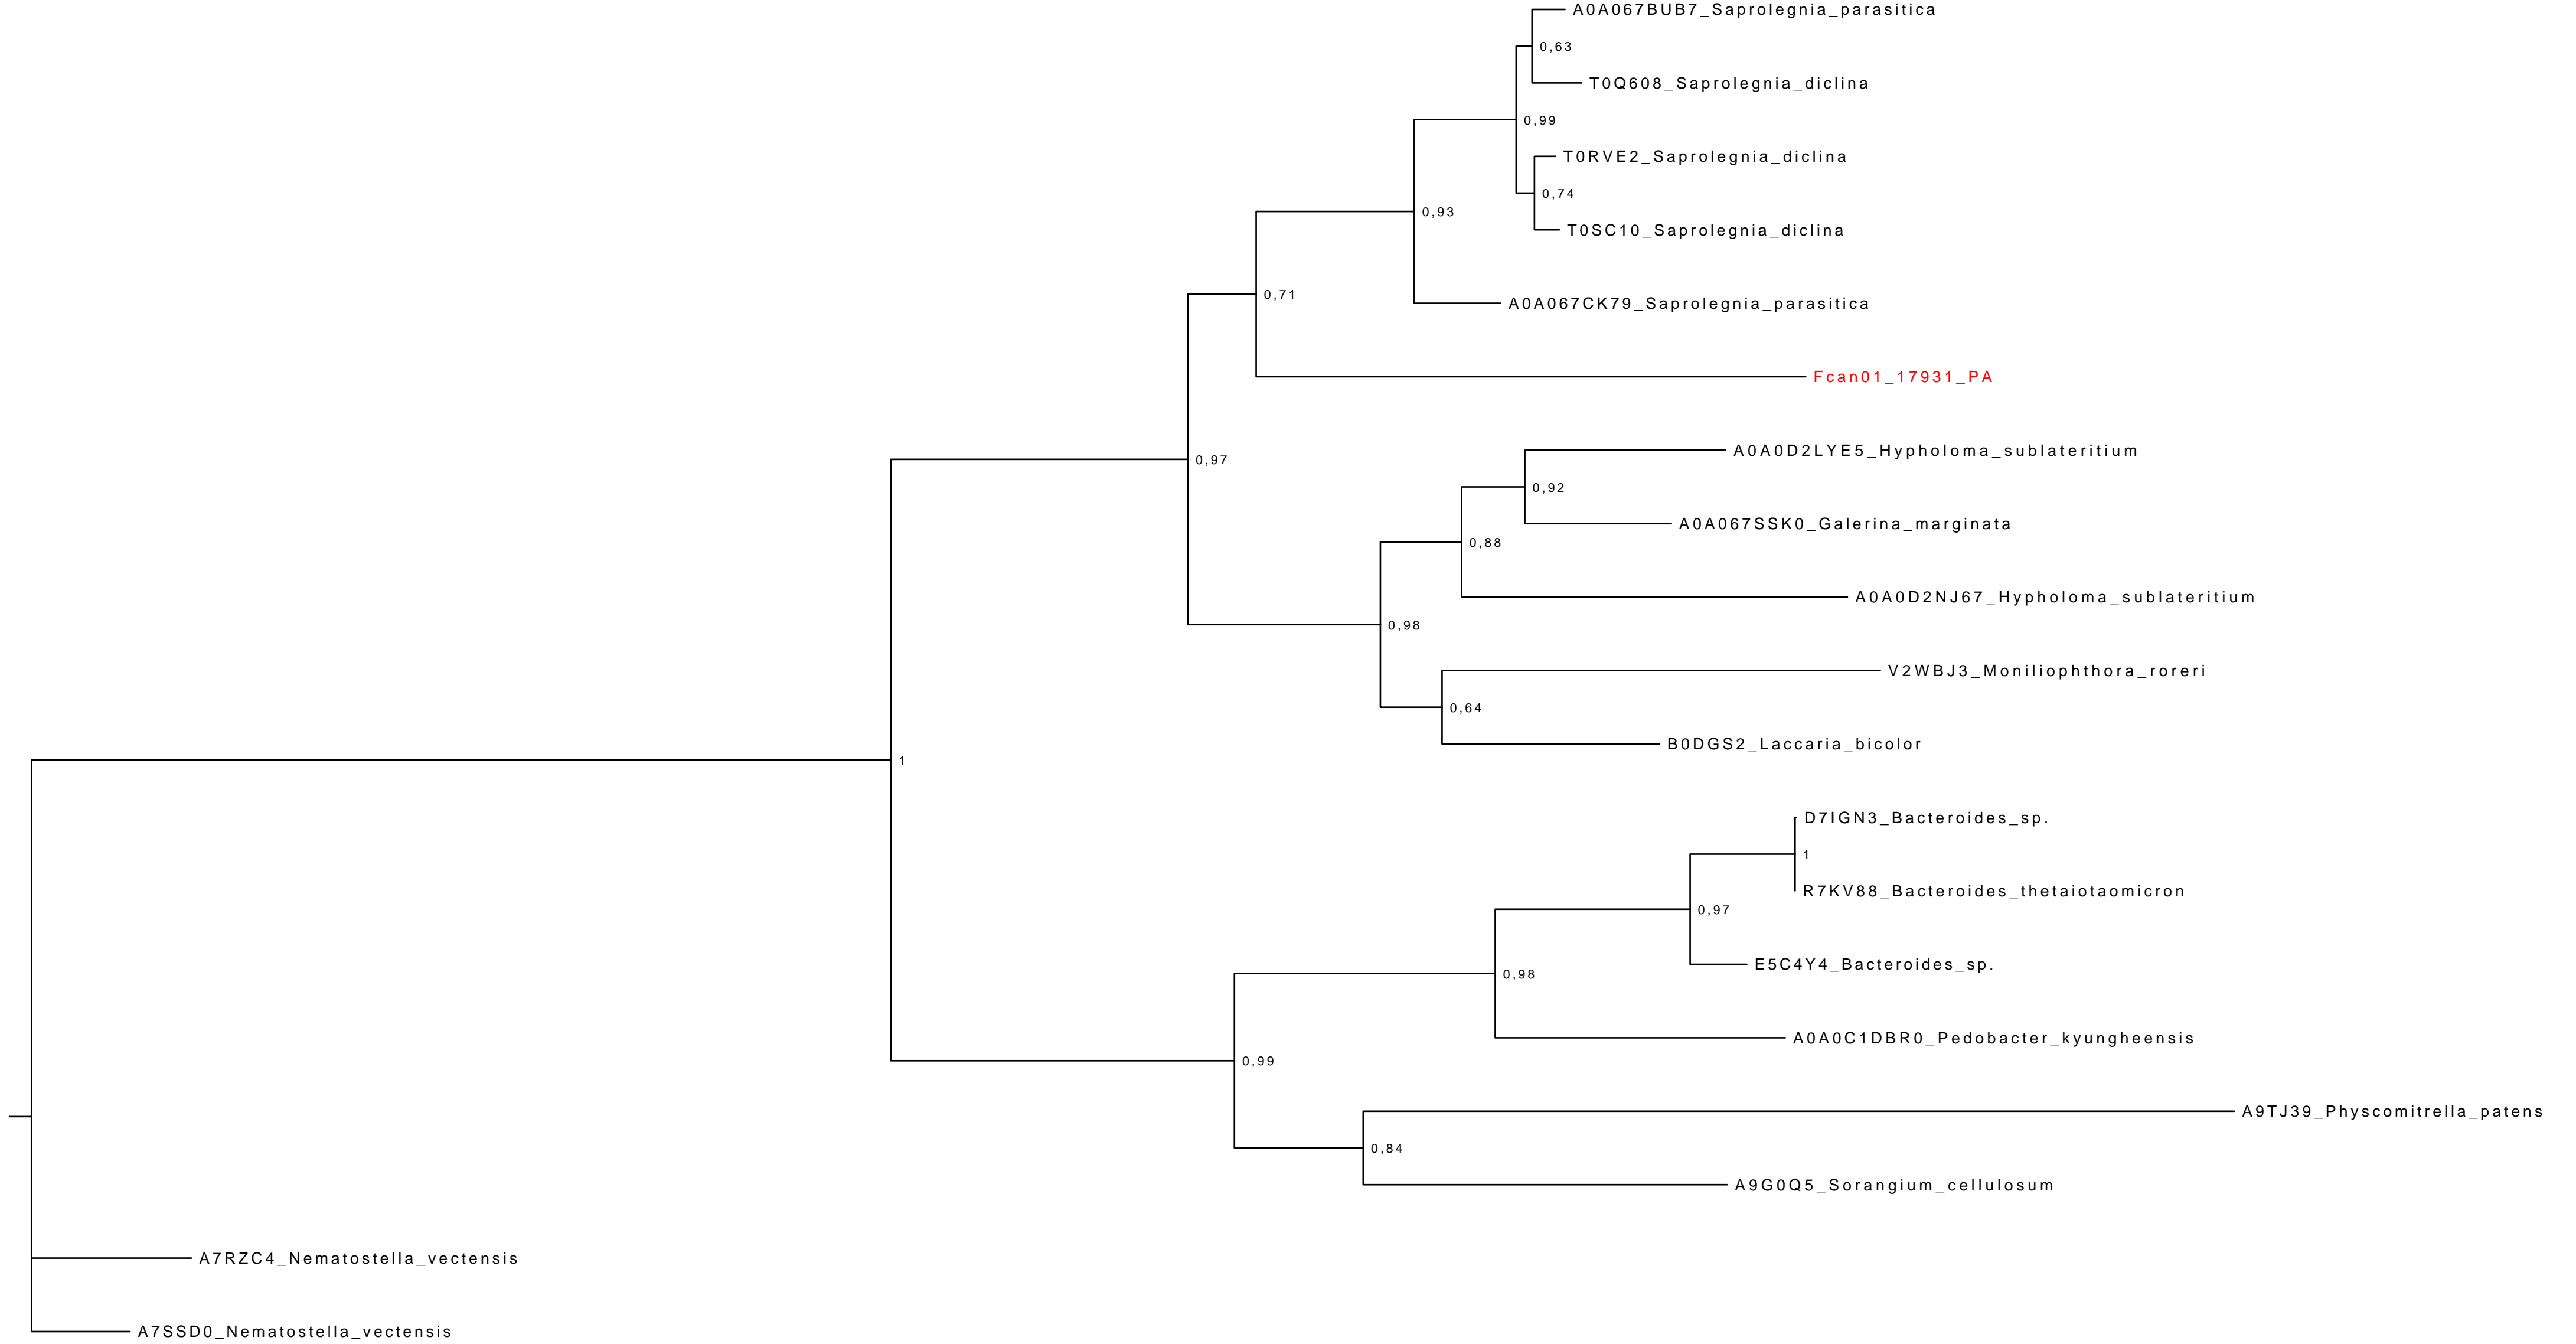

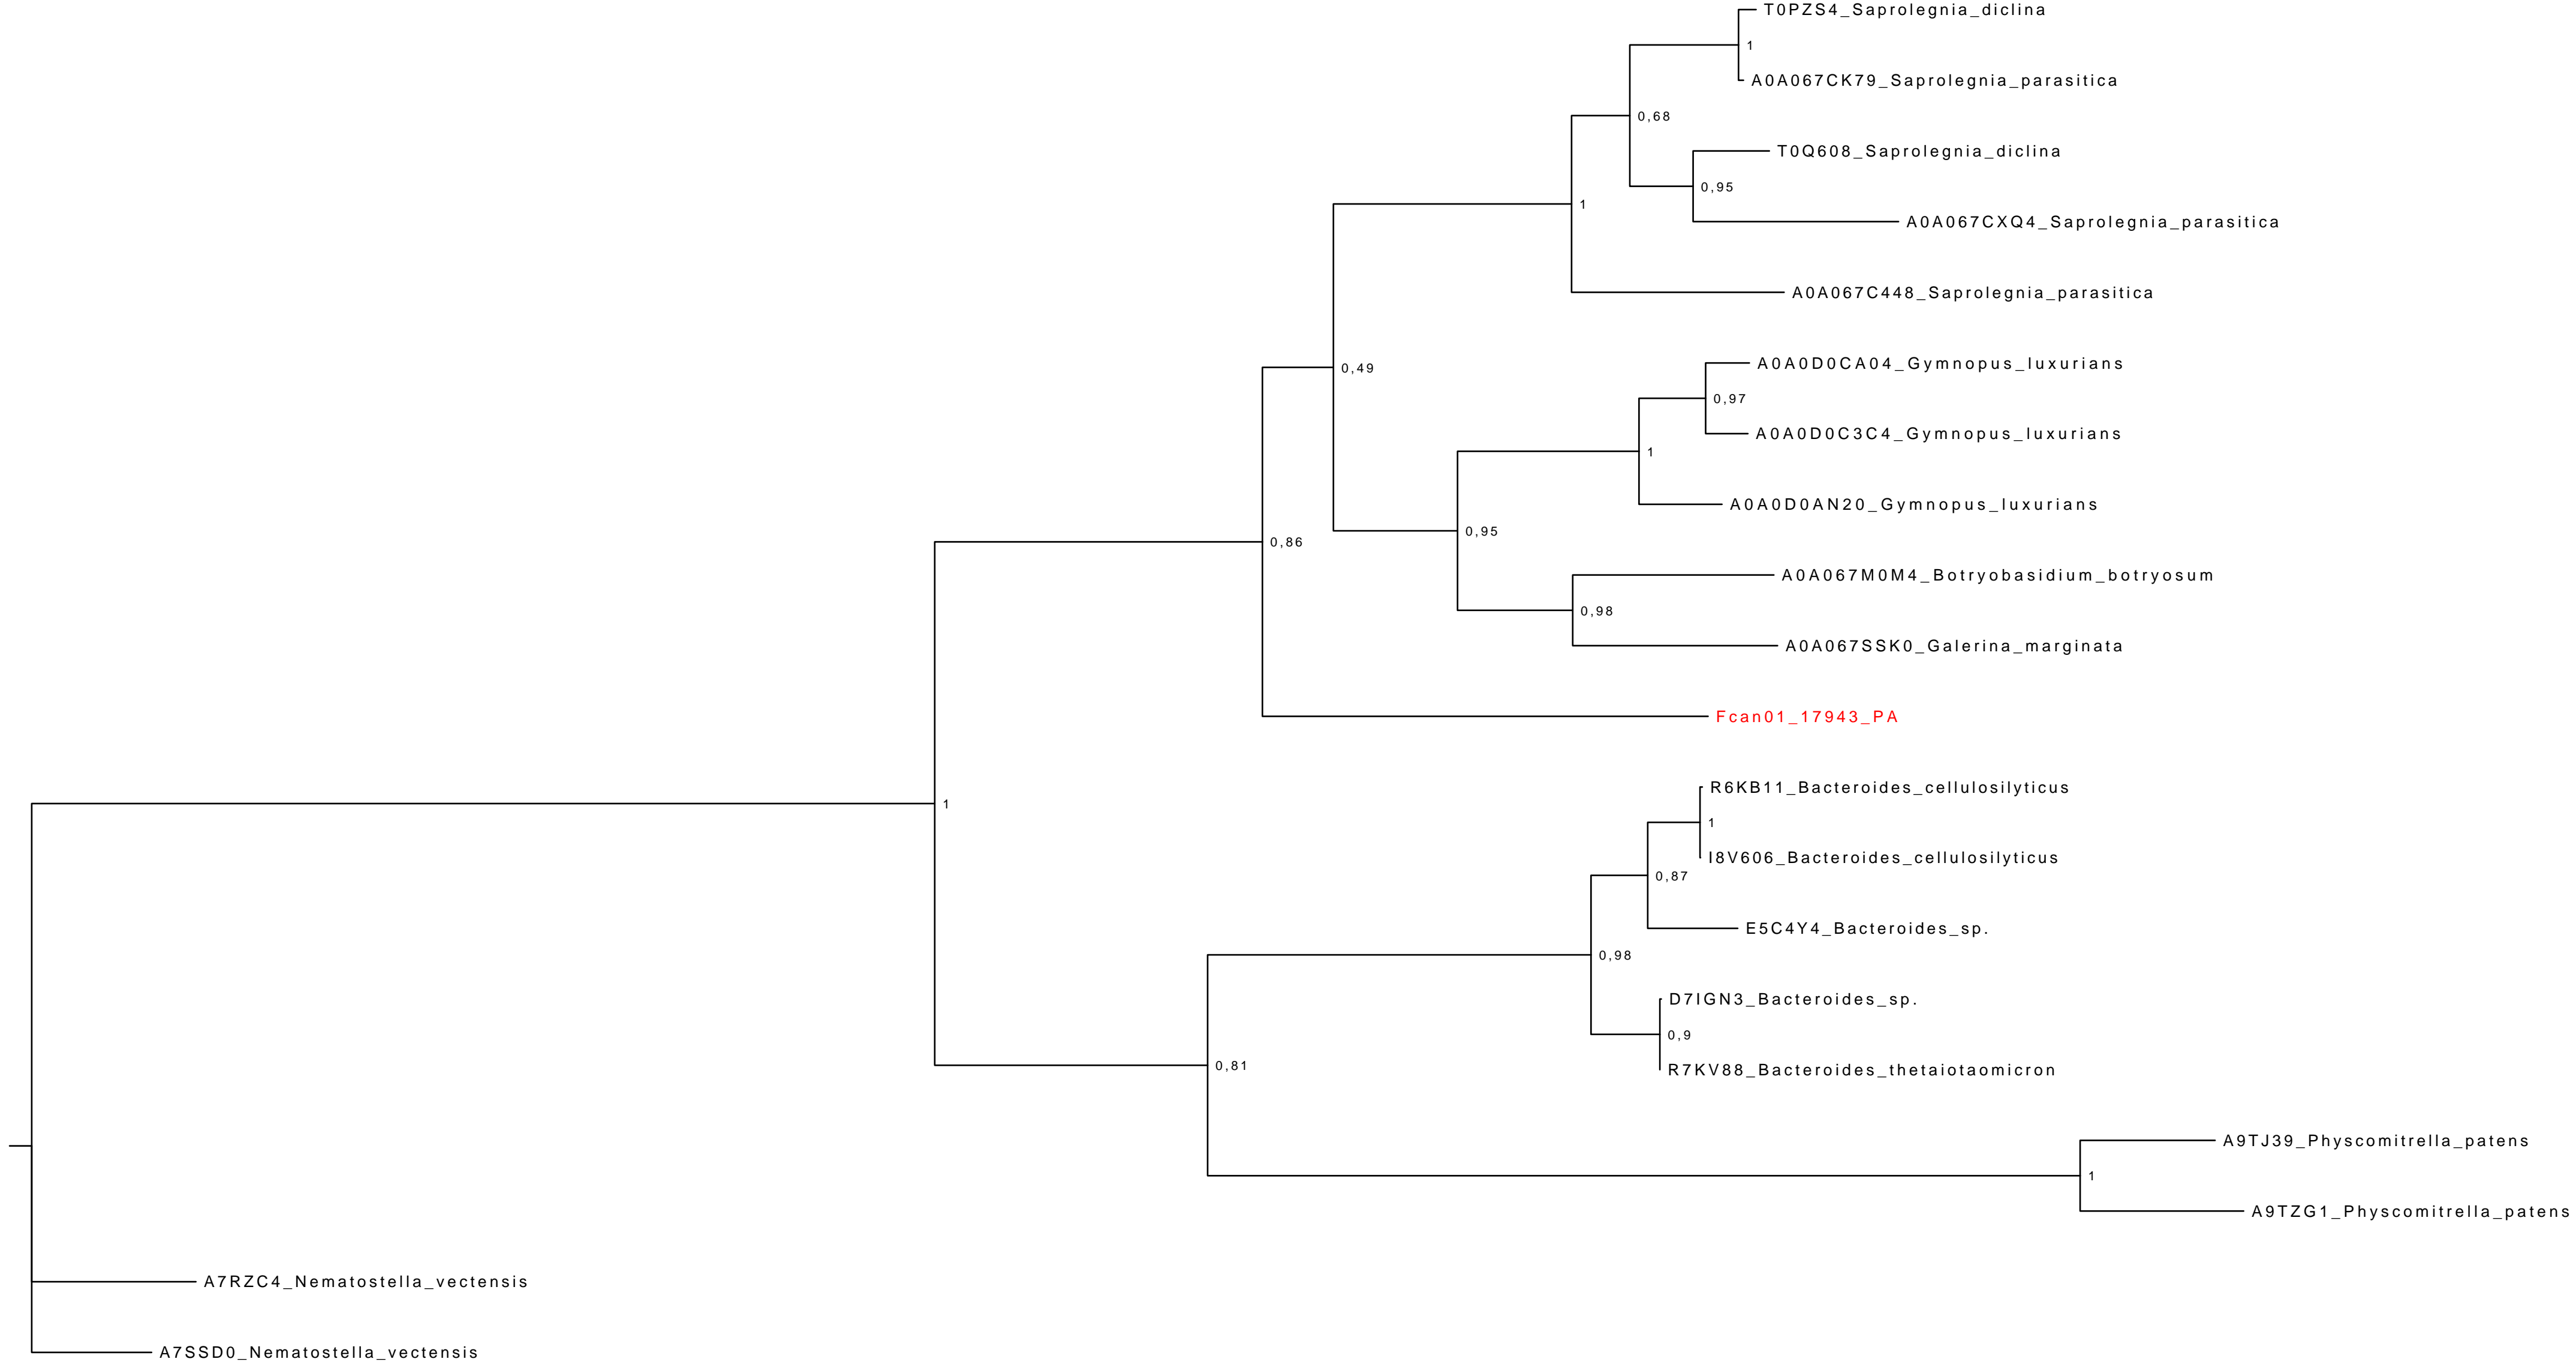

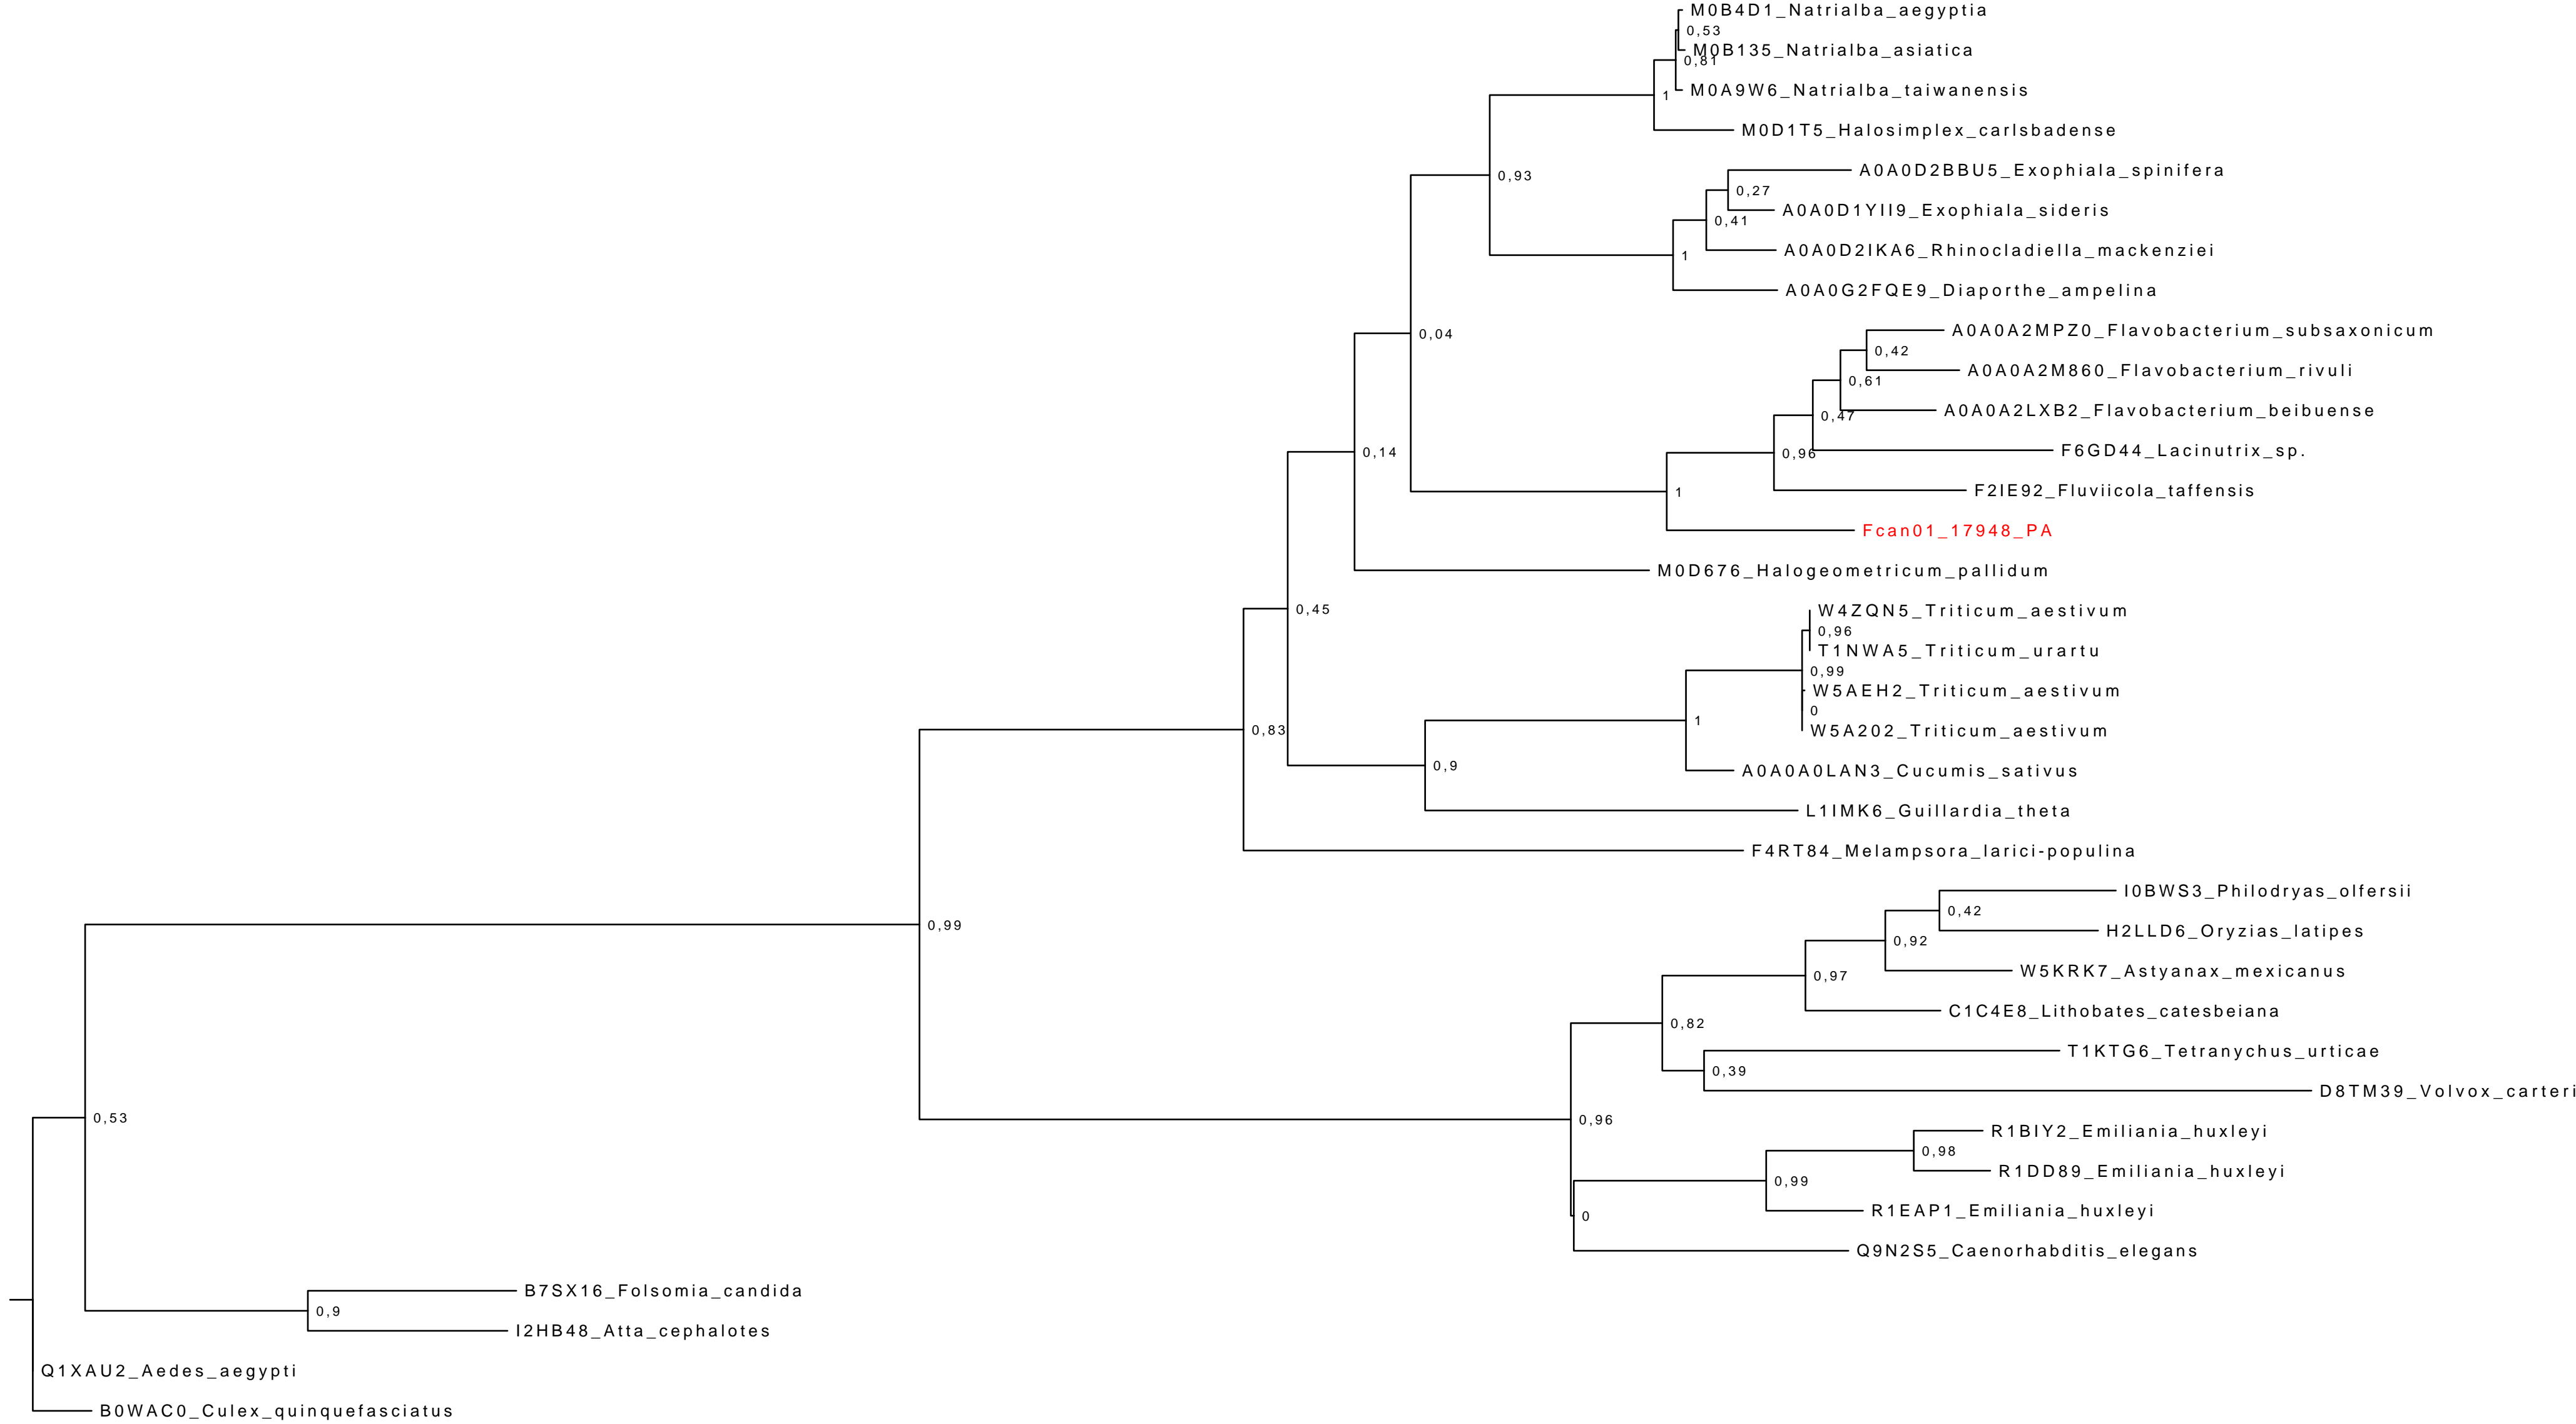

0.8

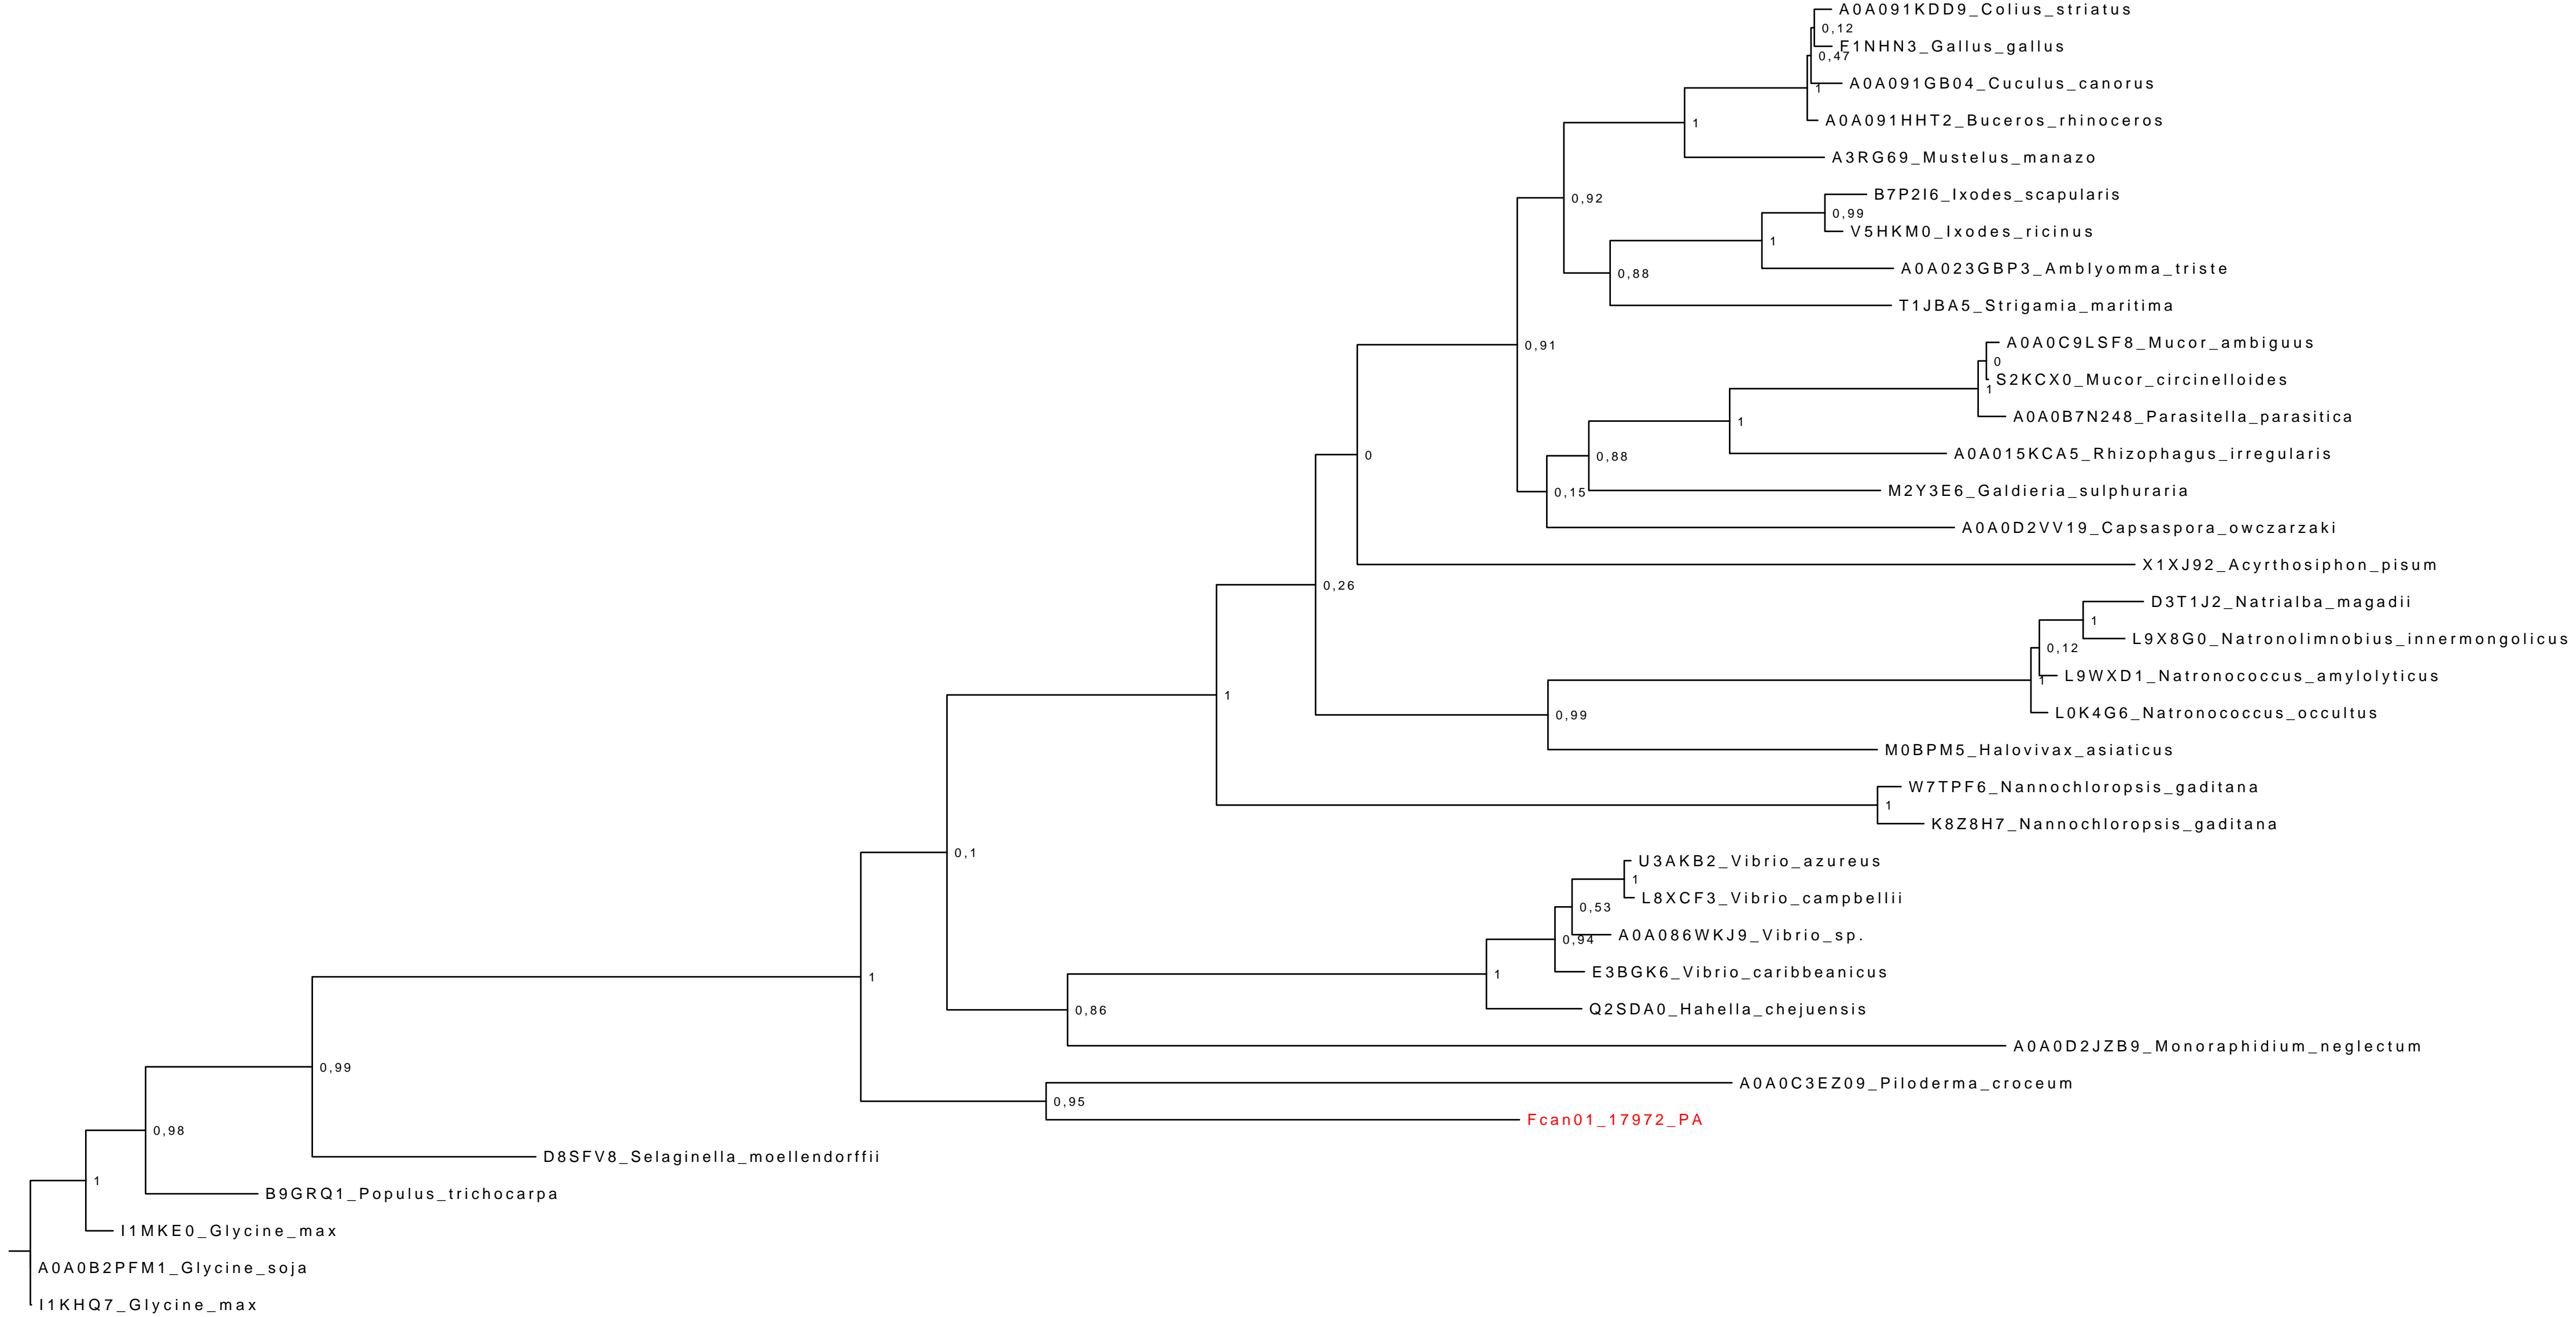



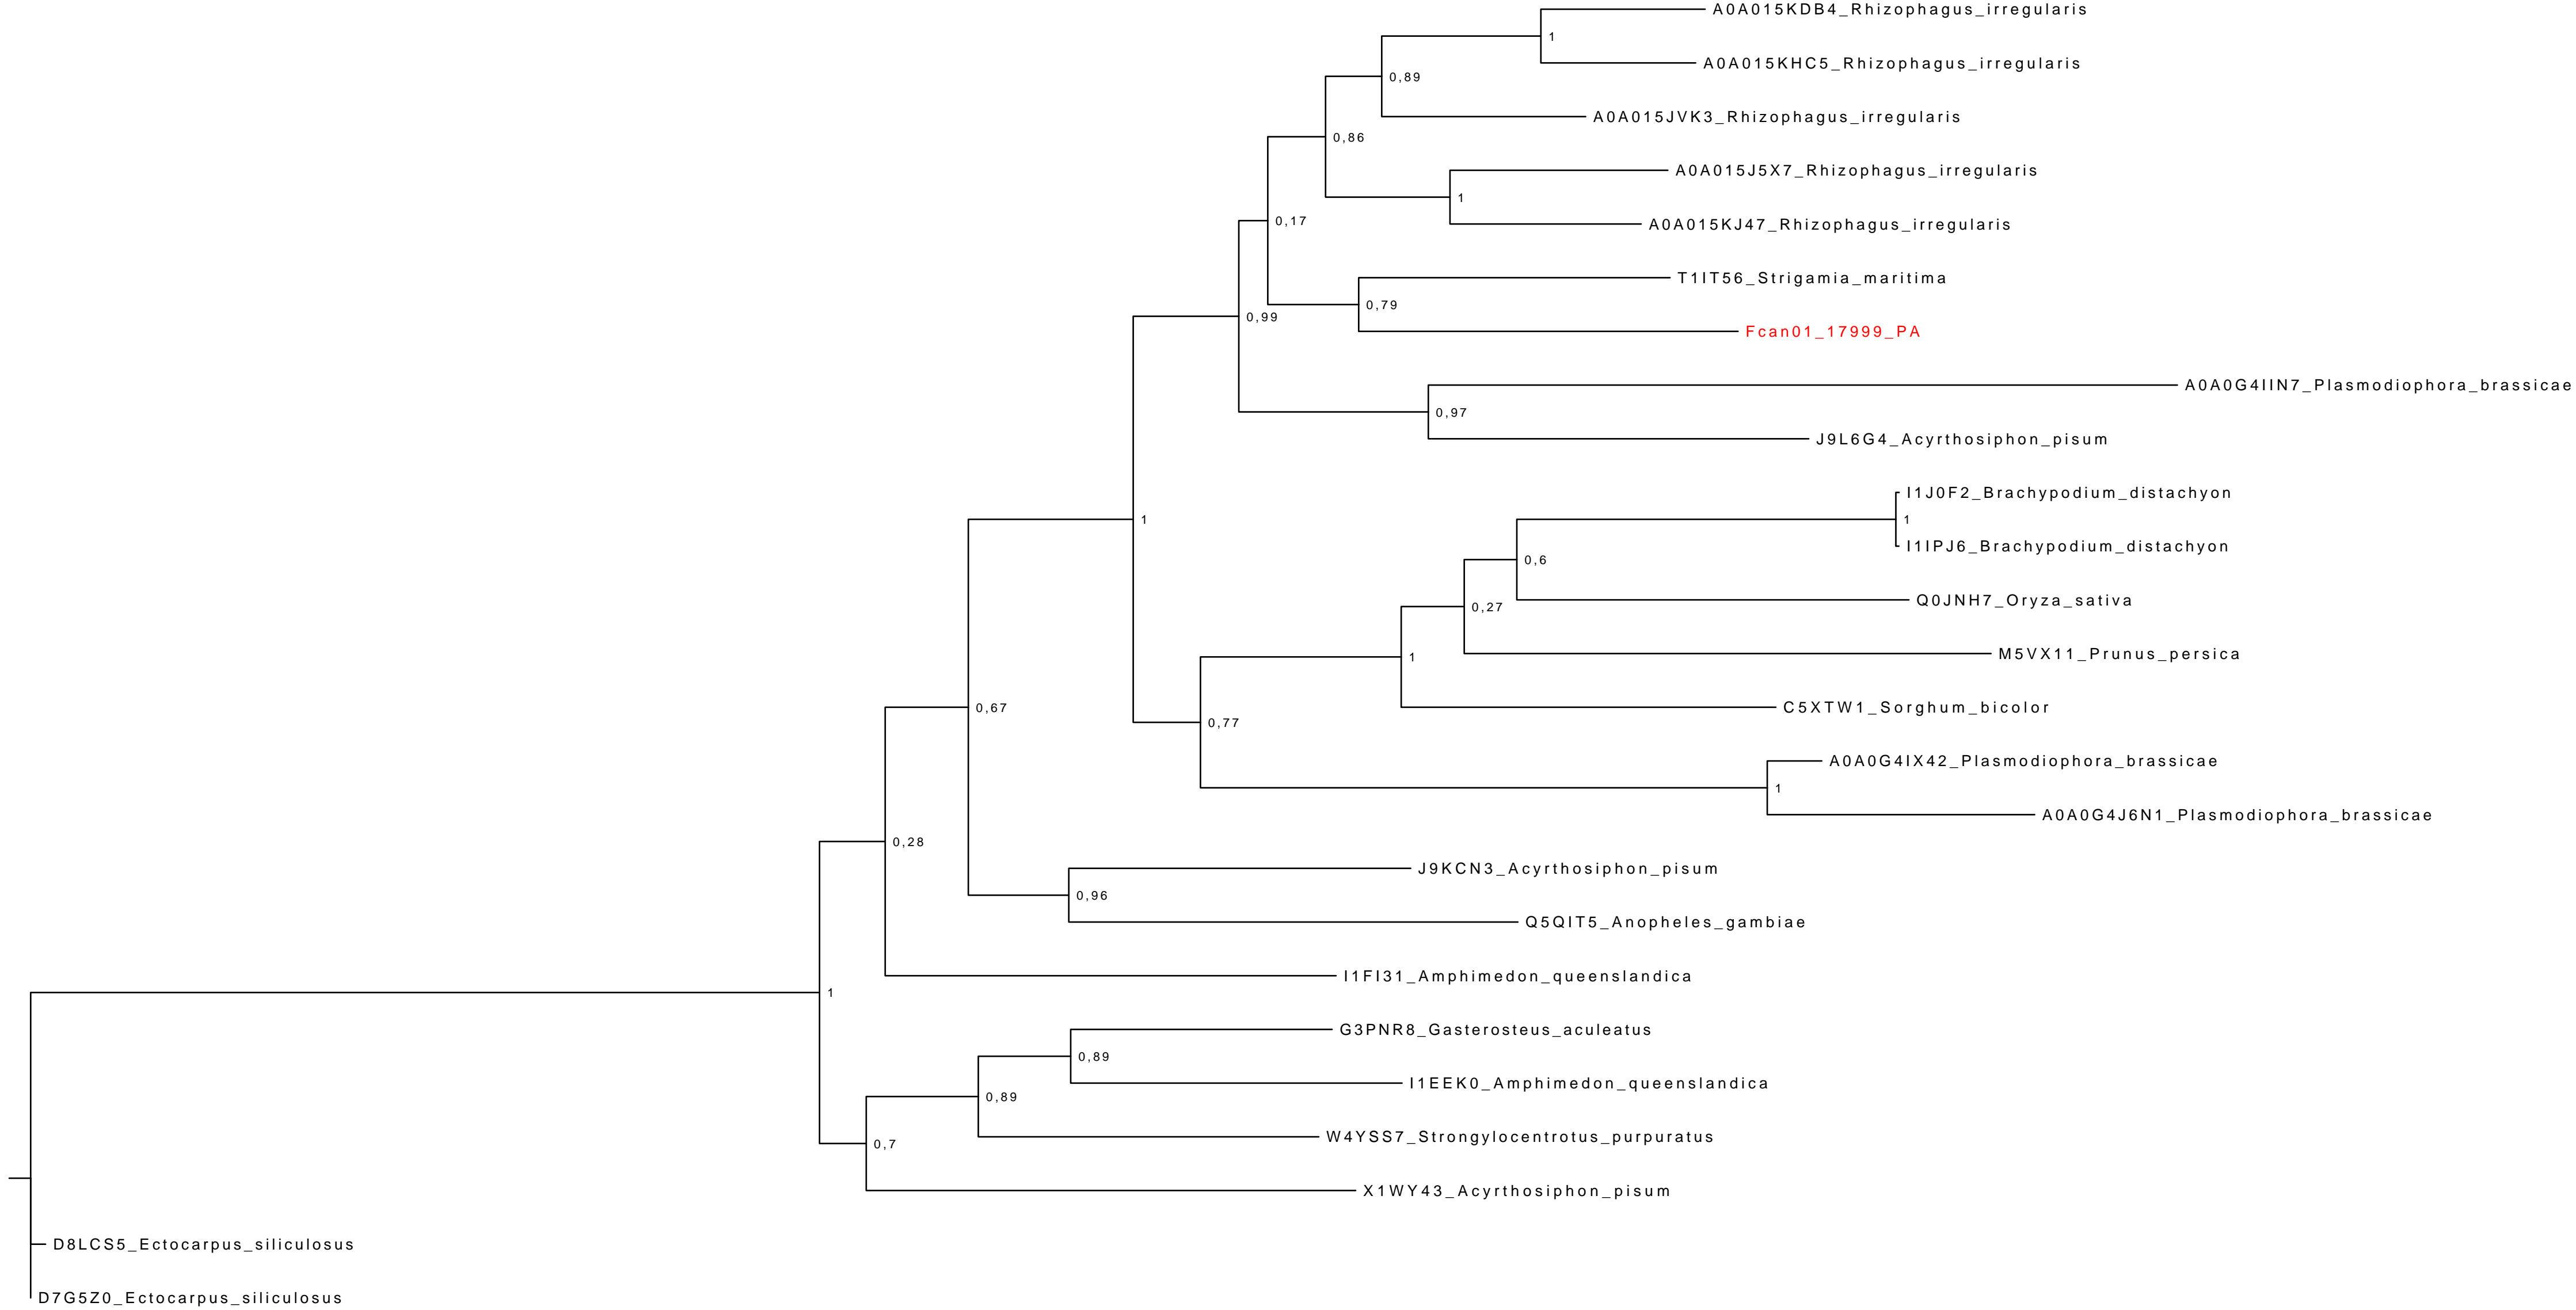

0.6

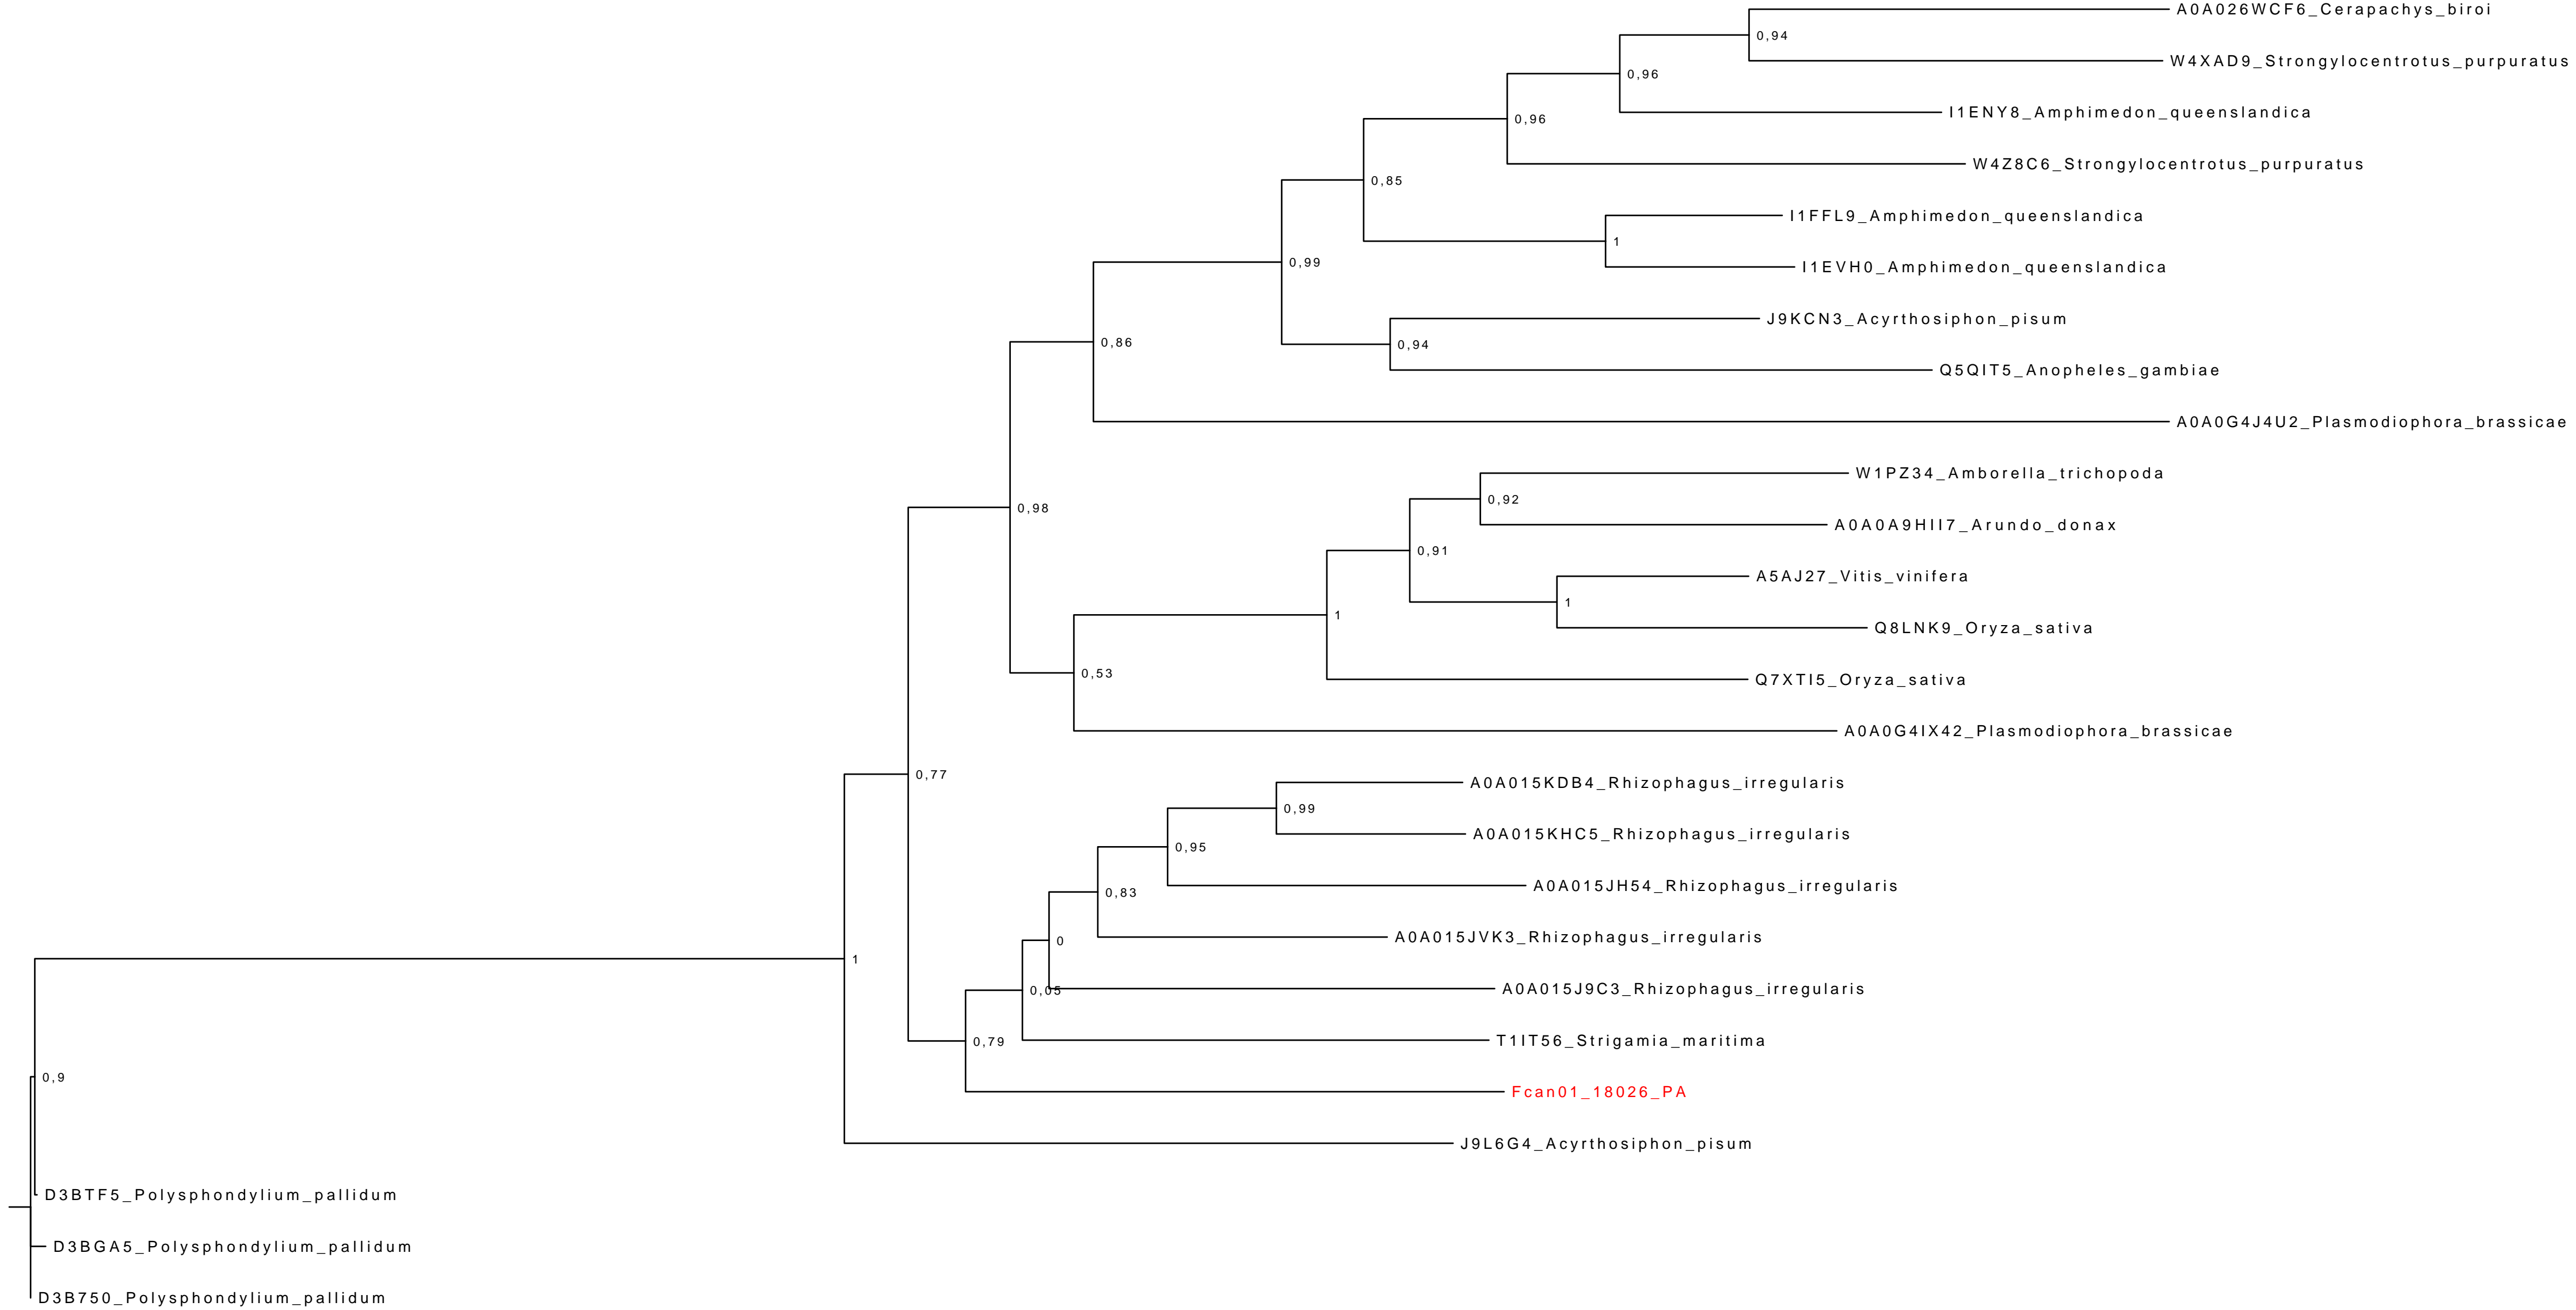

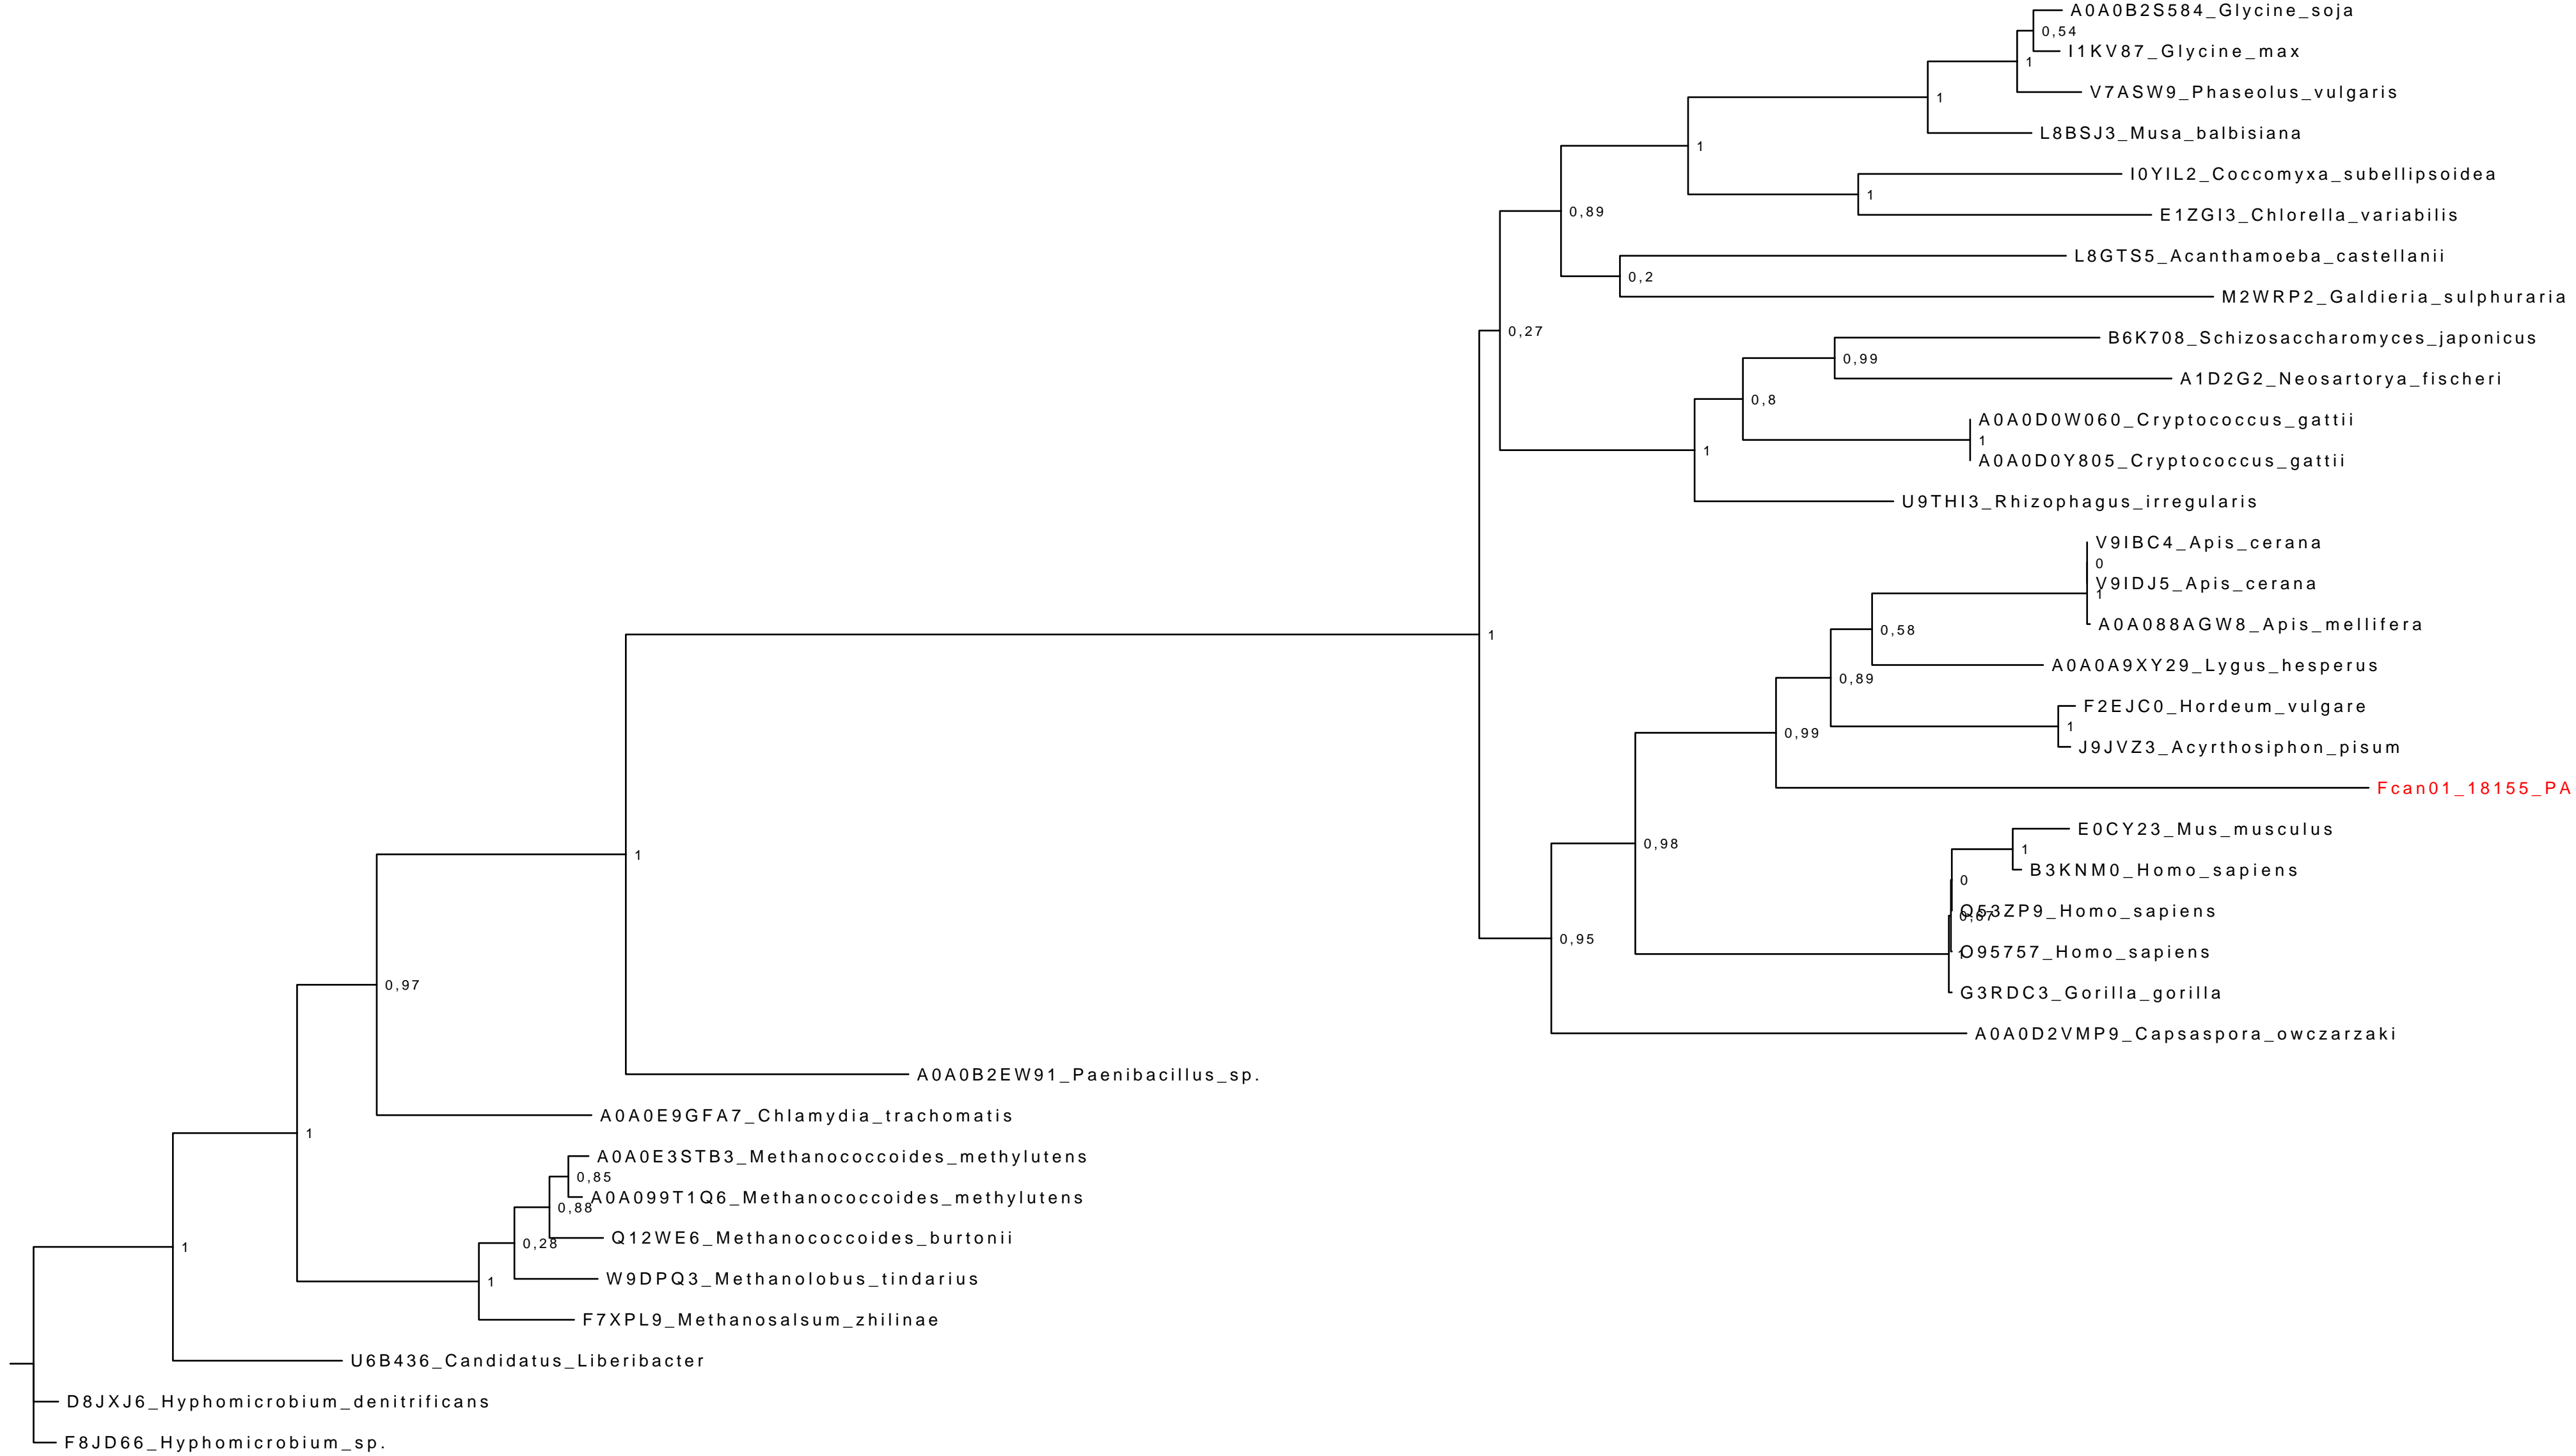

0.4

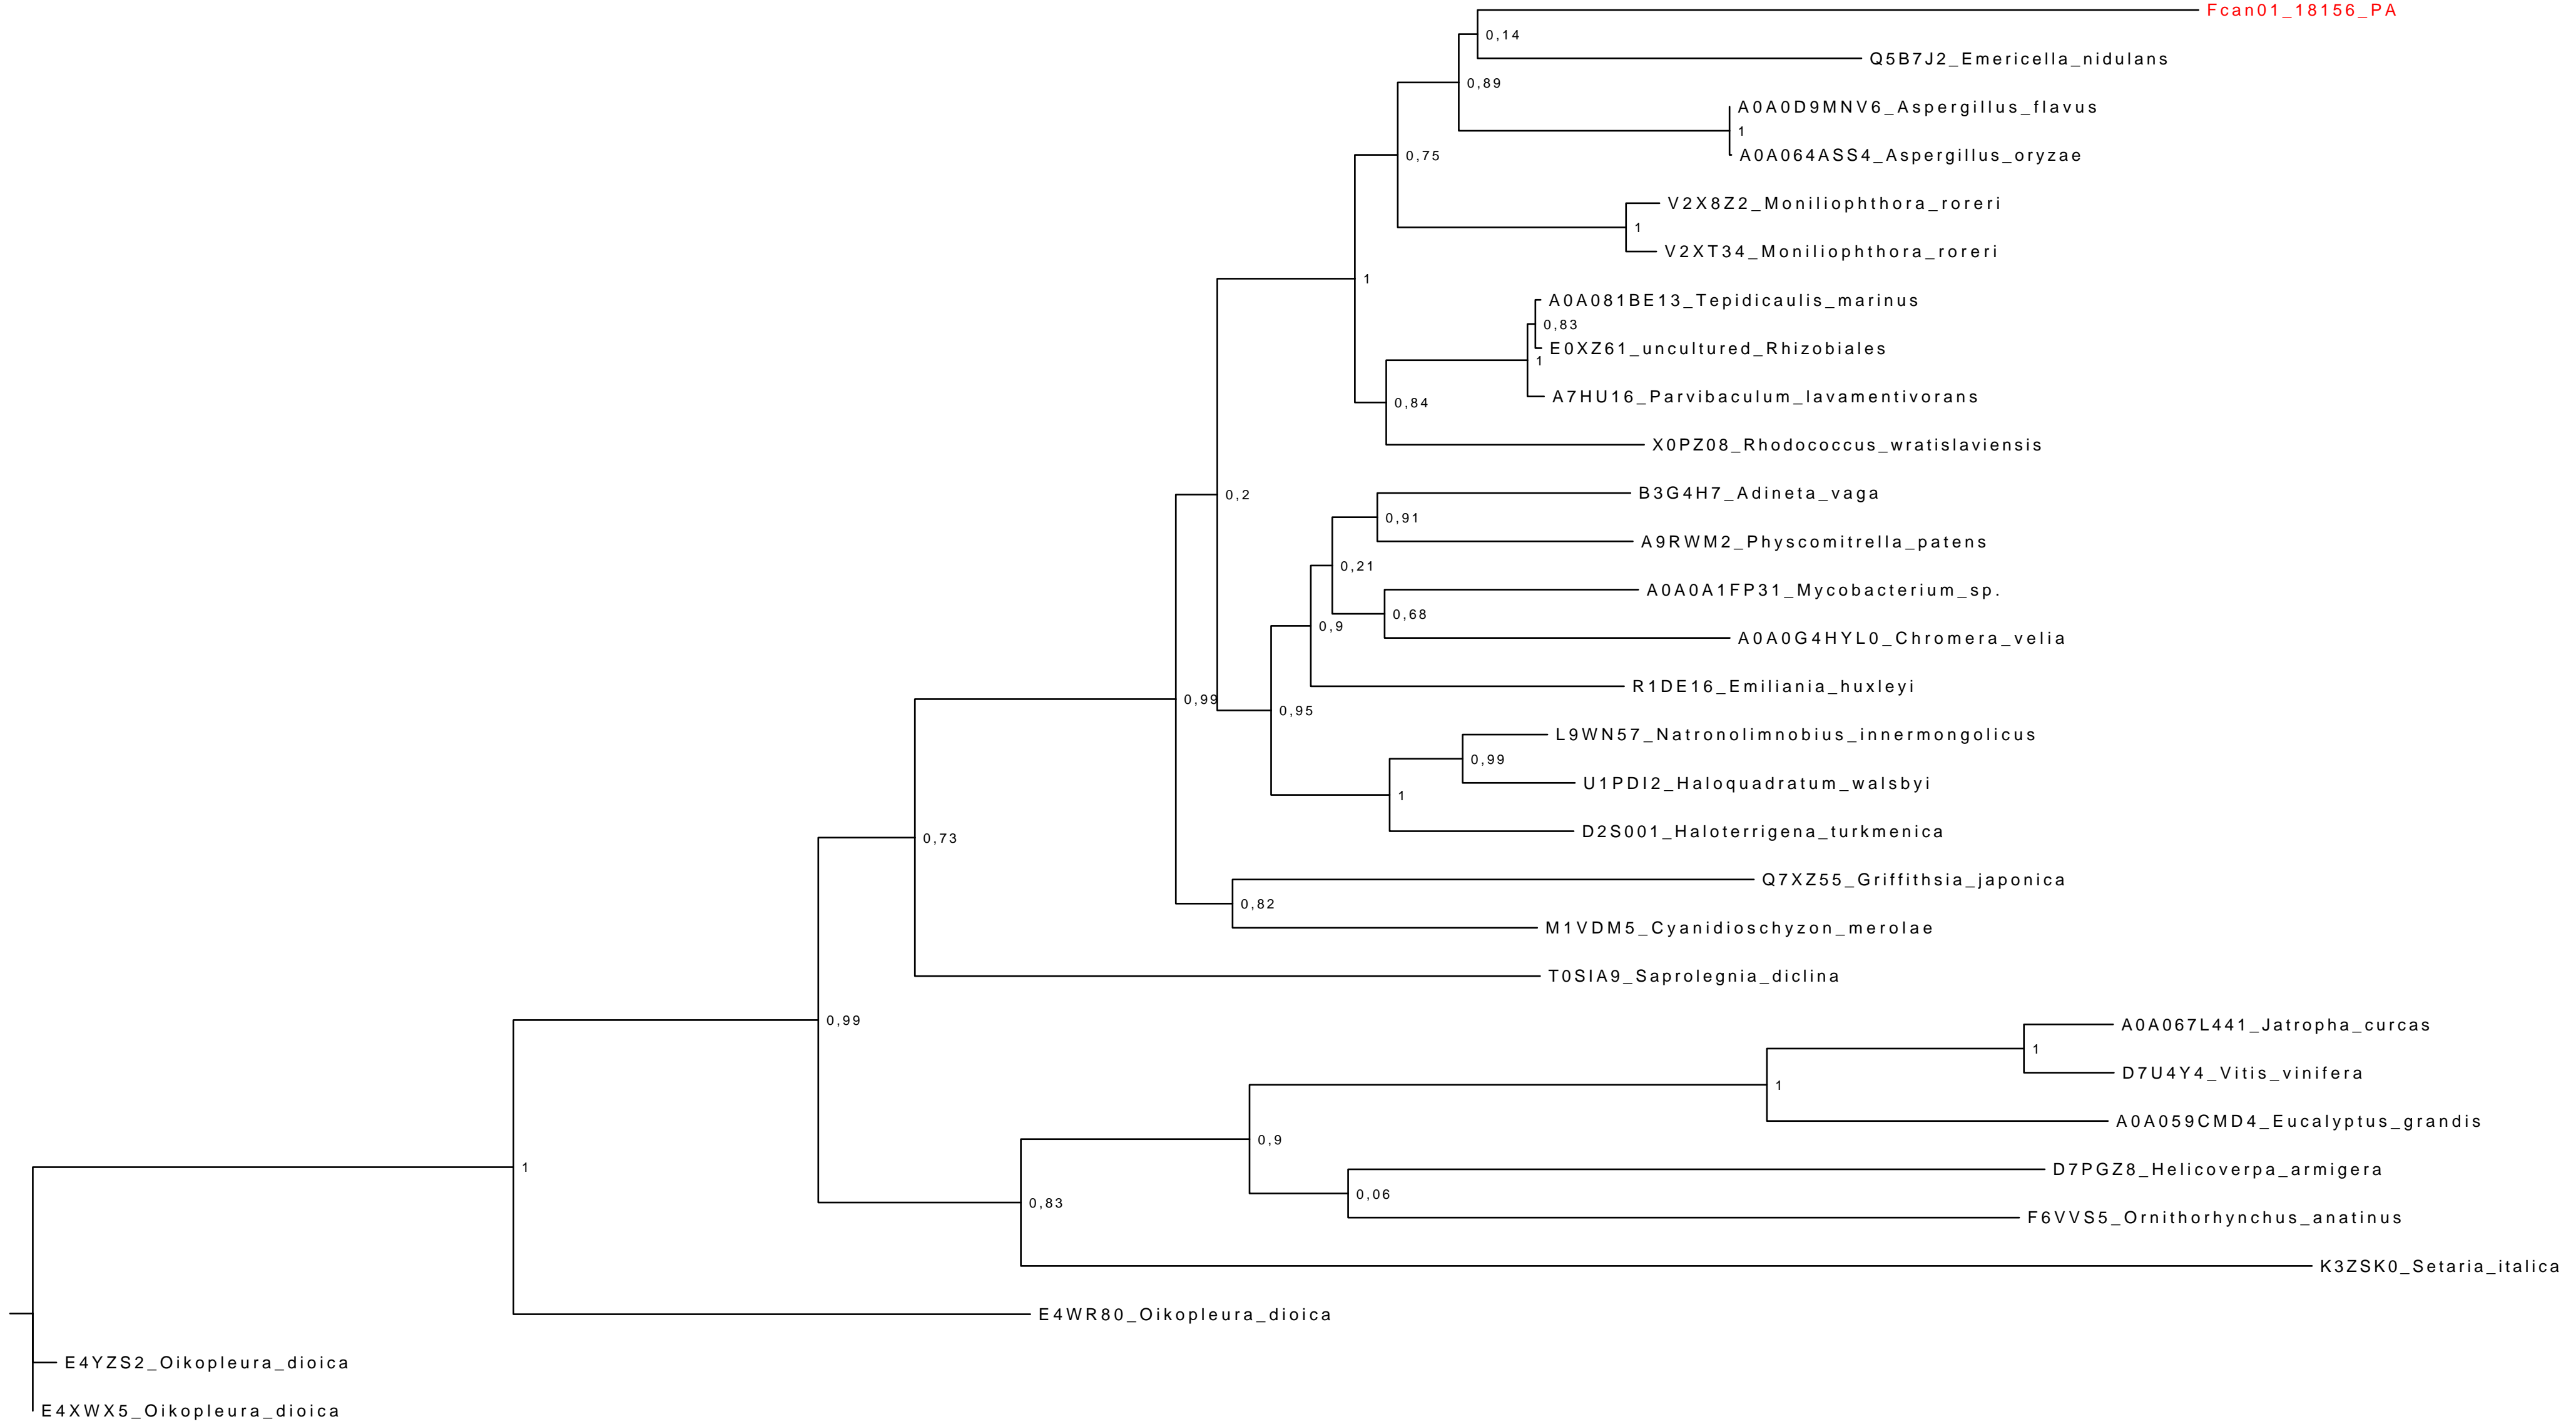

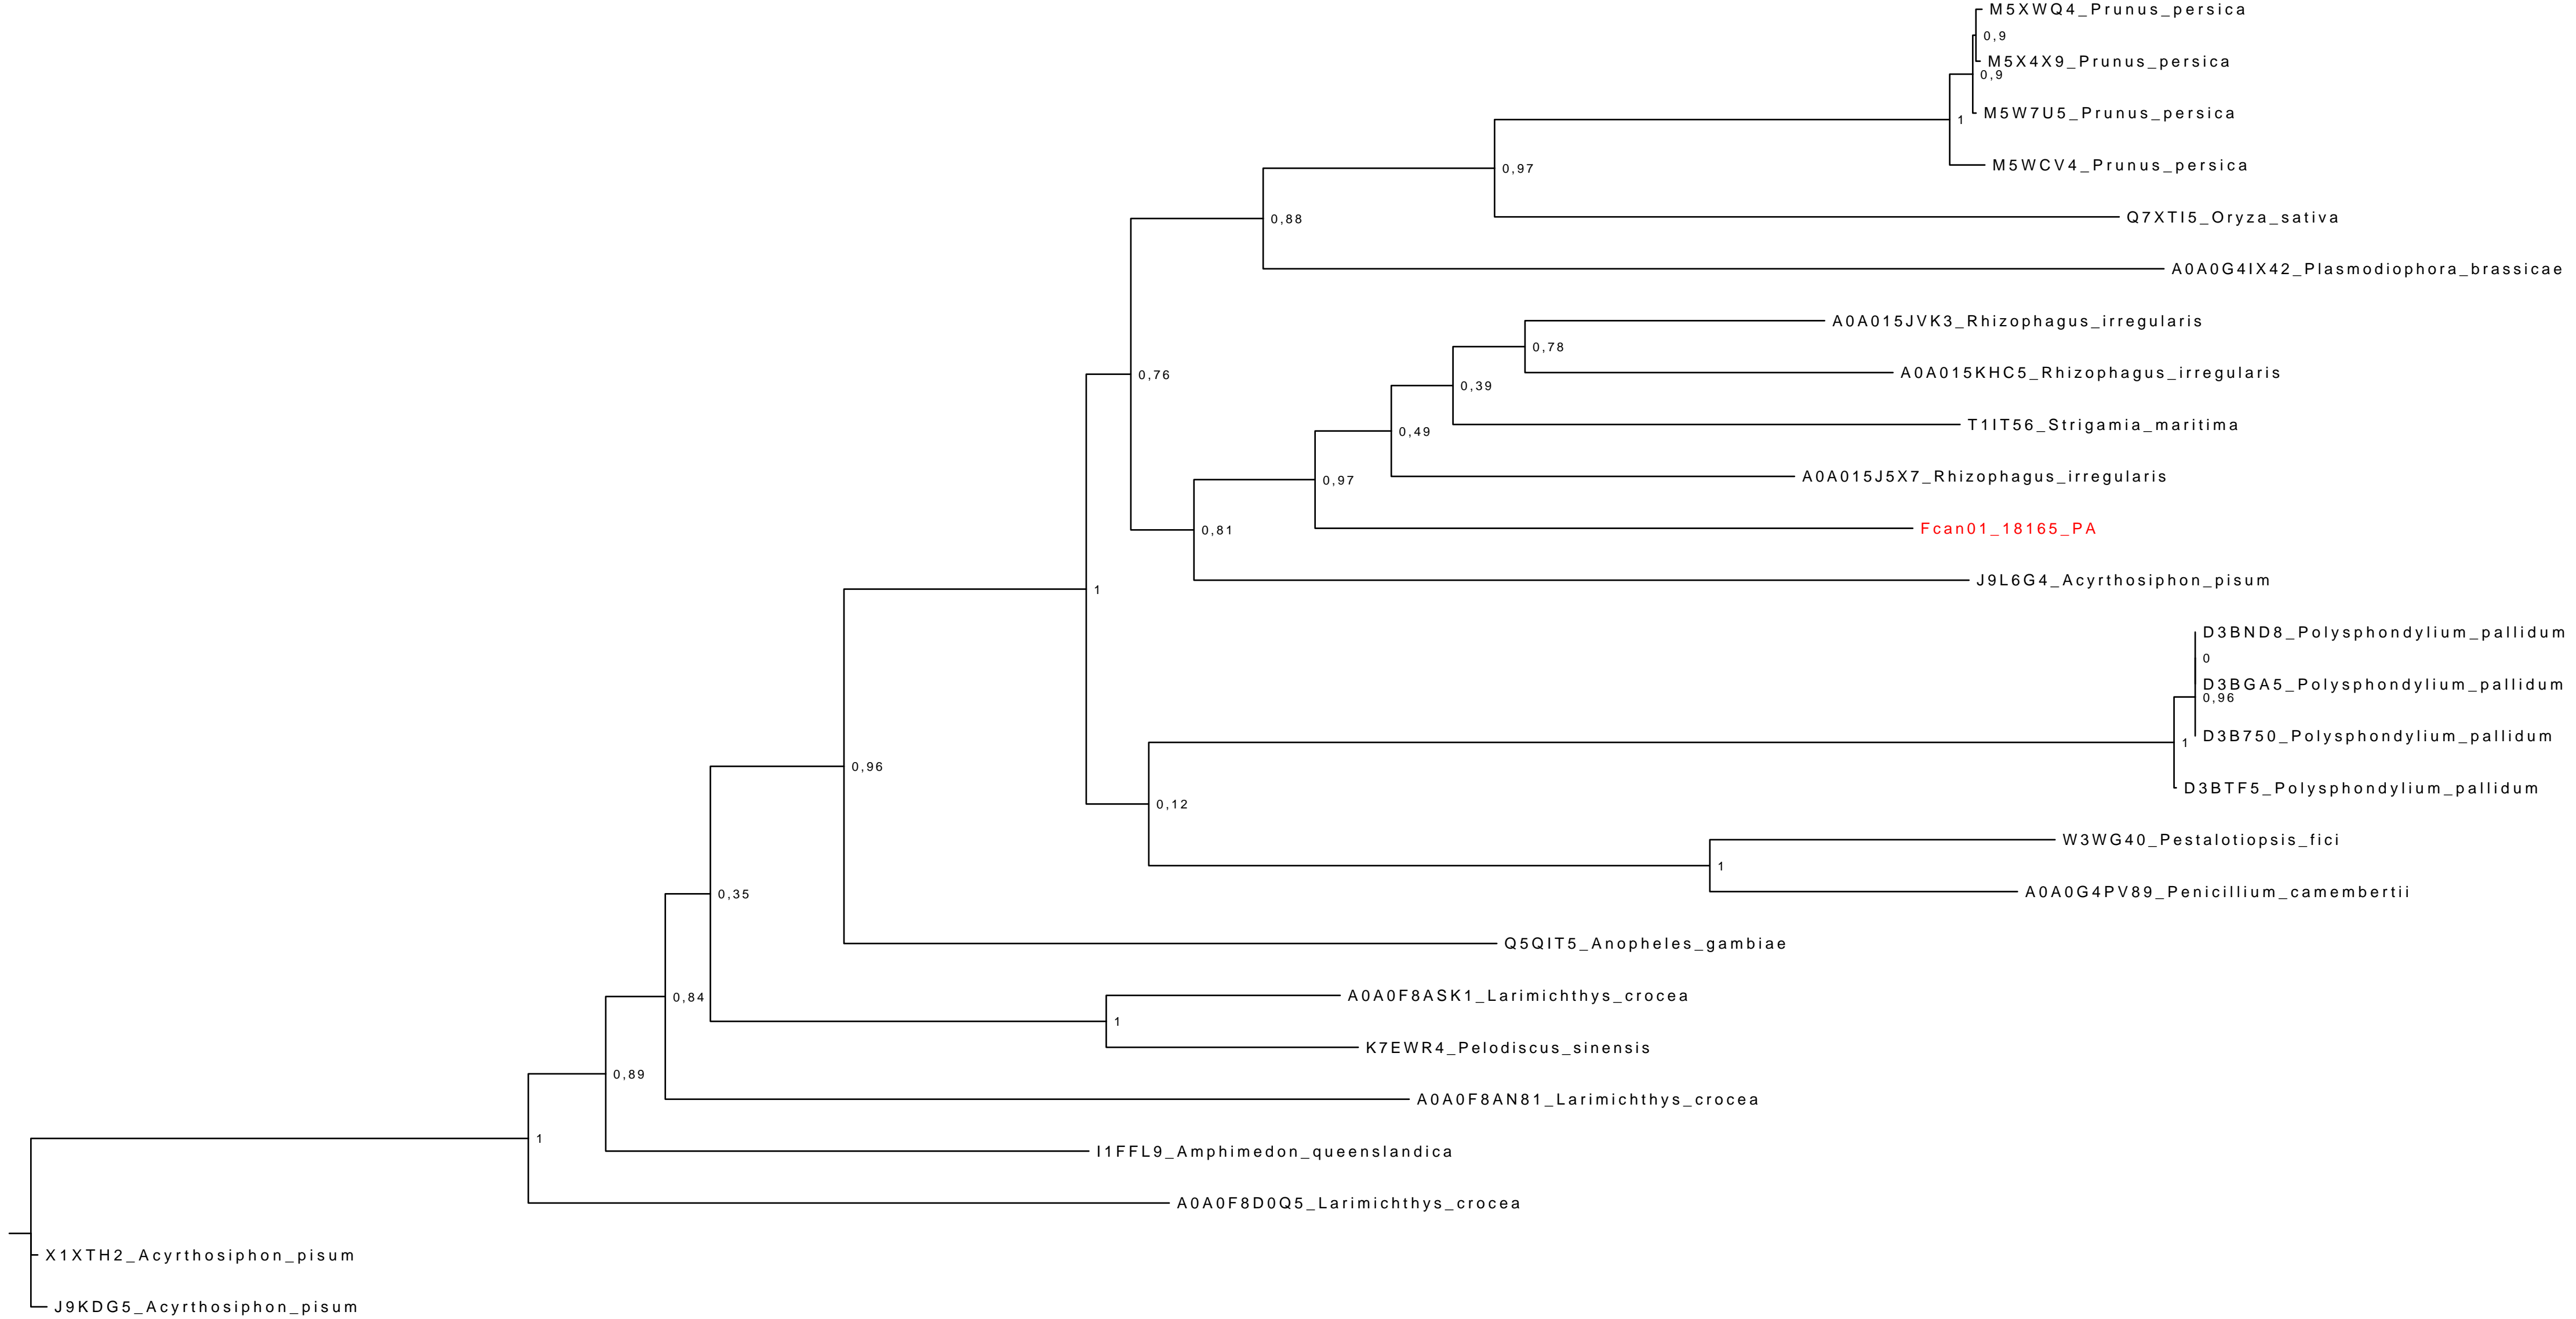

0.4

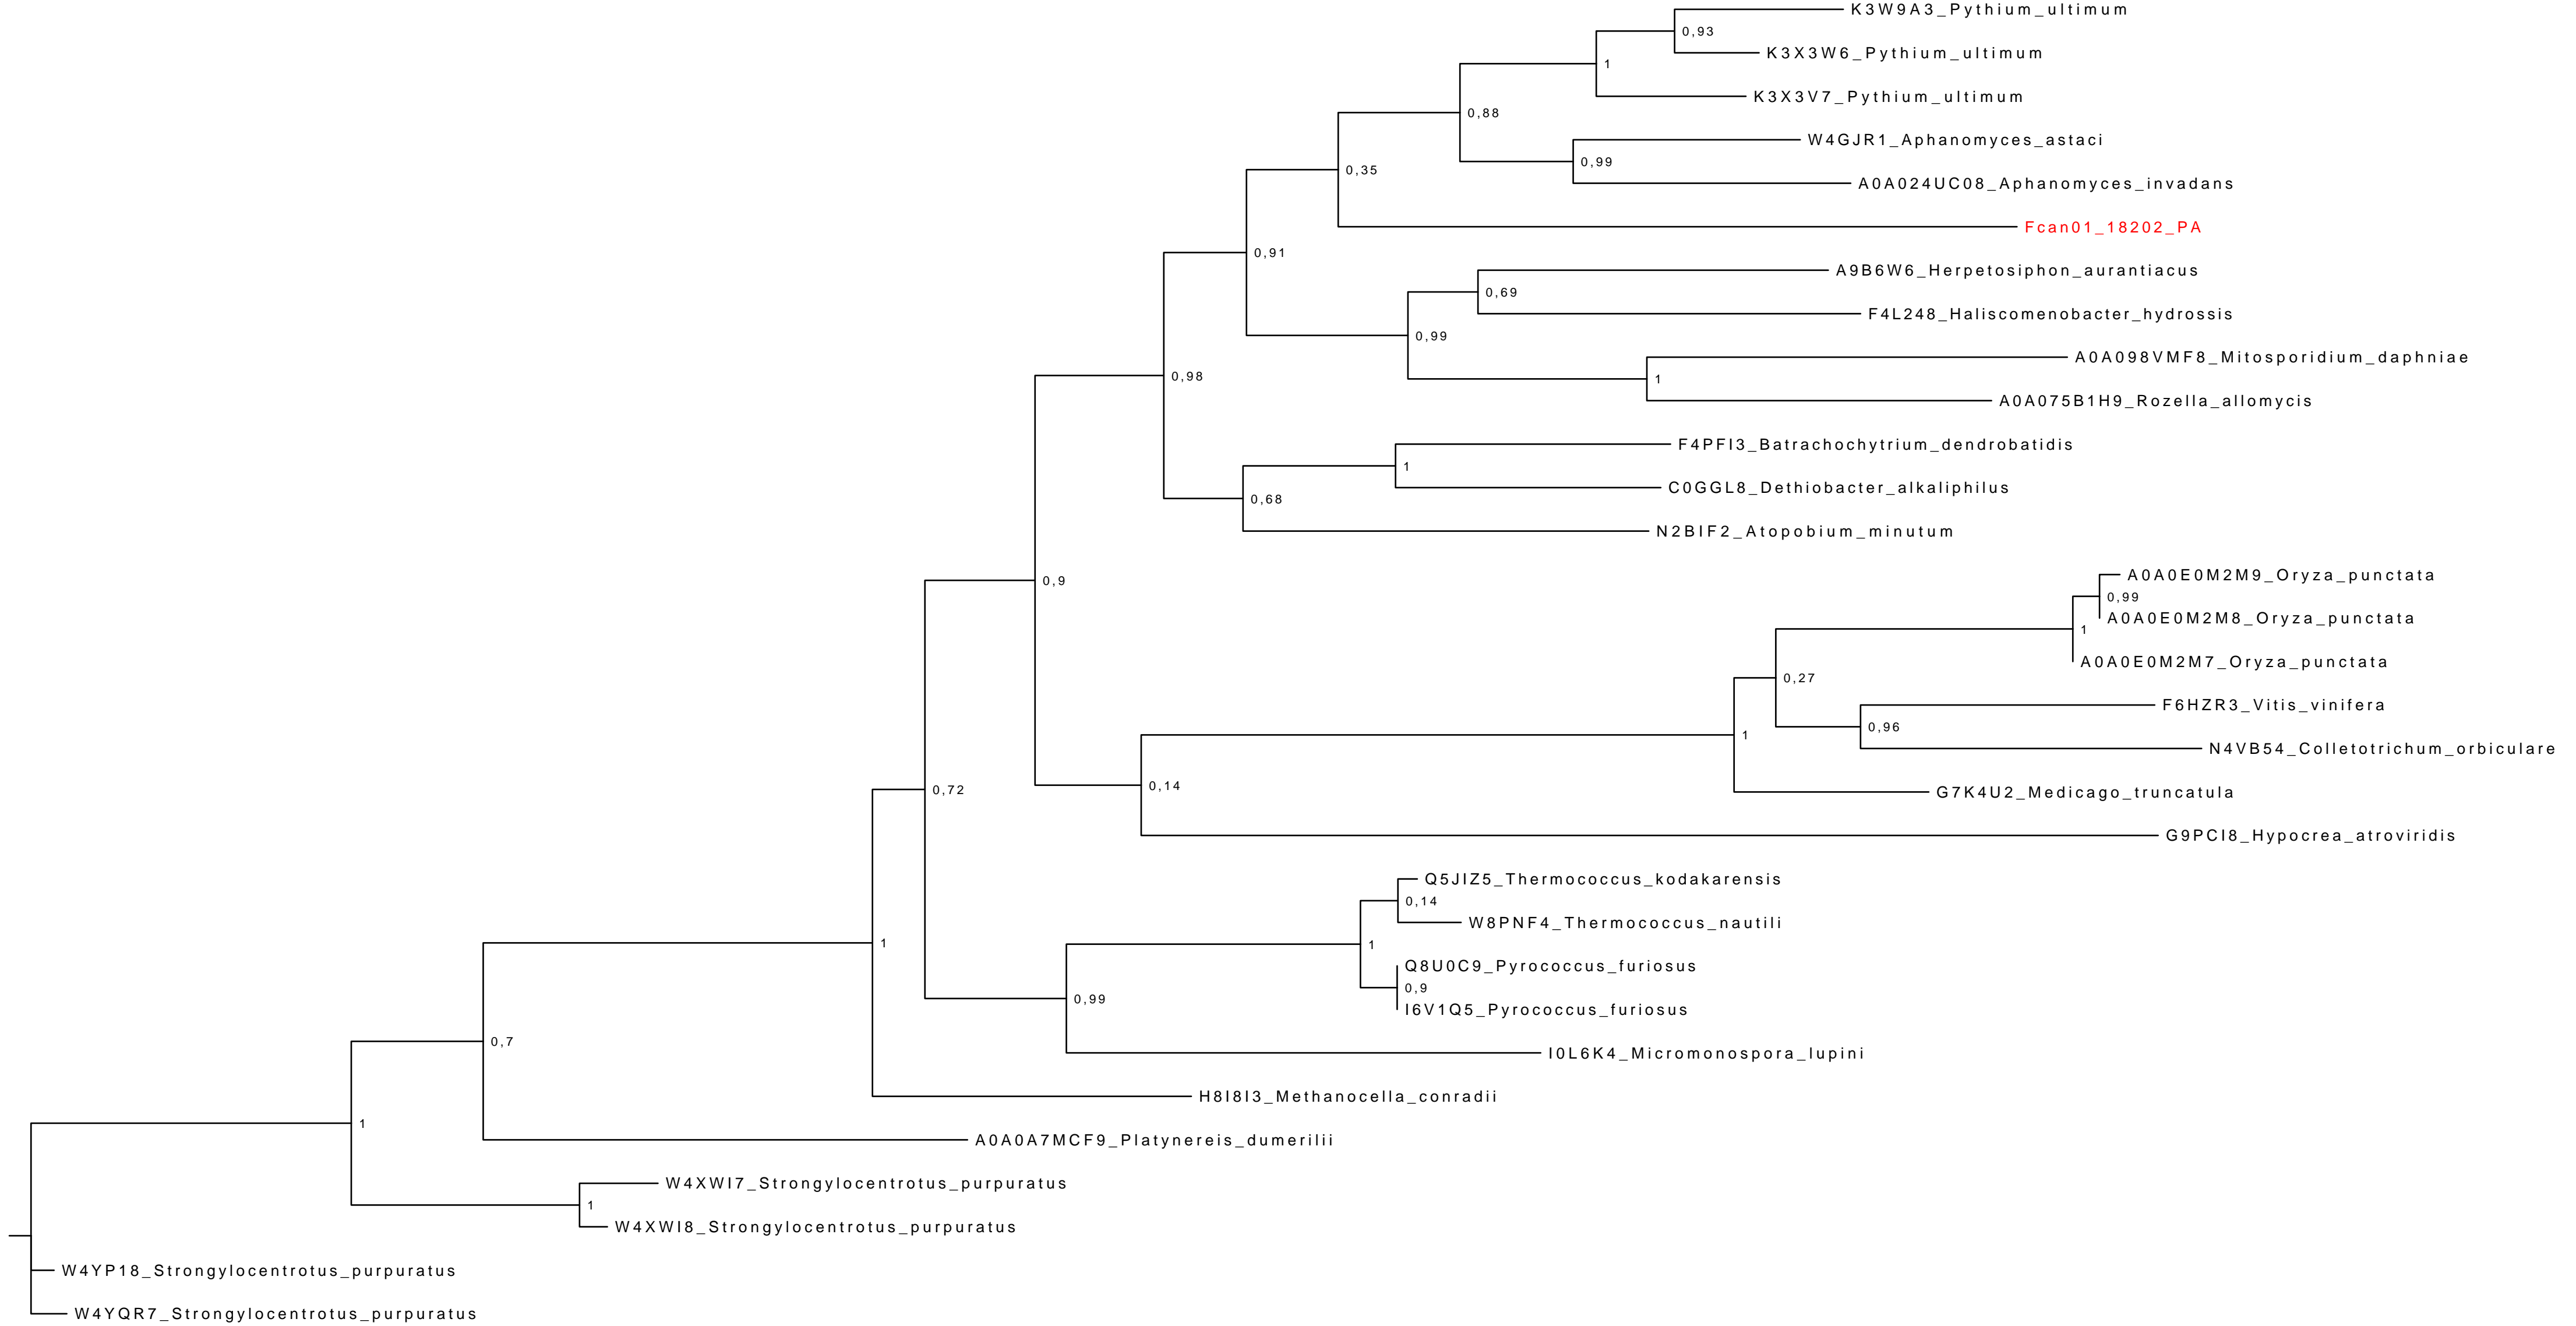

0.5

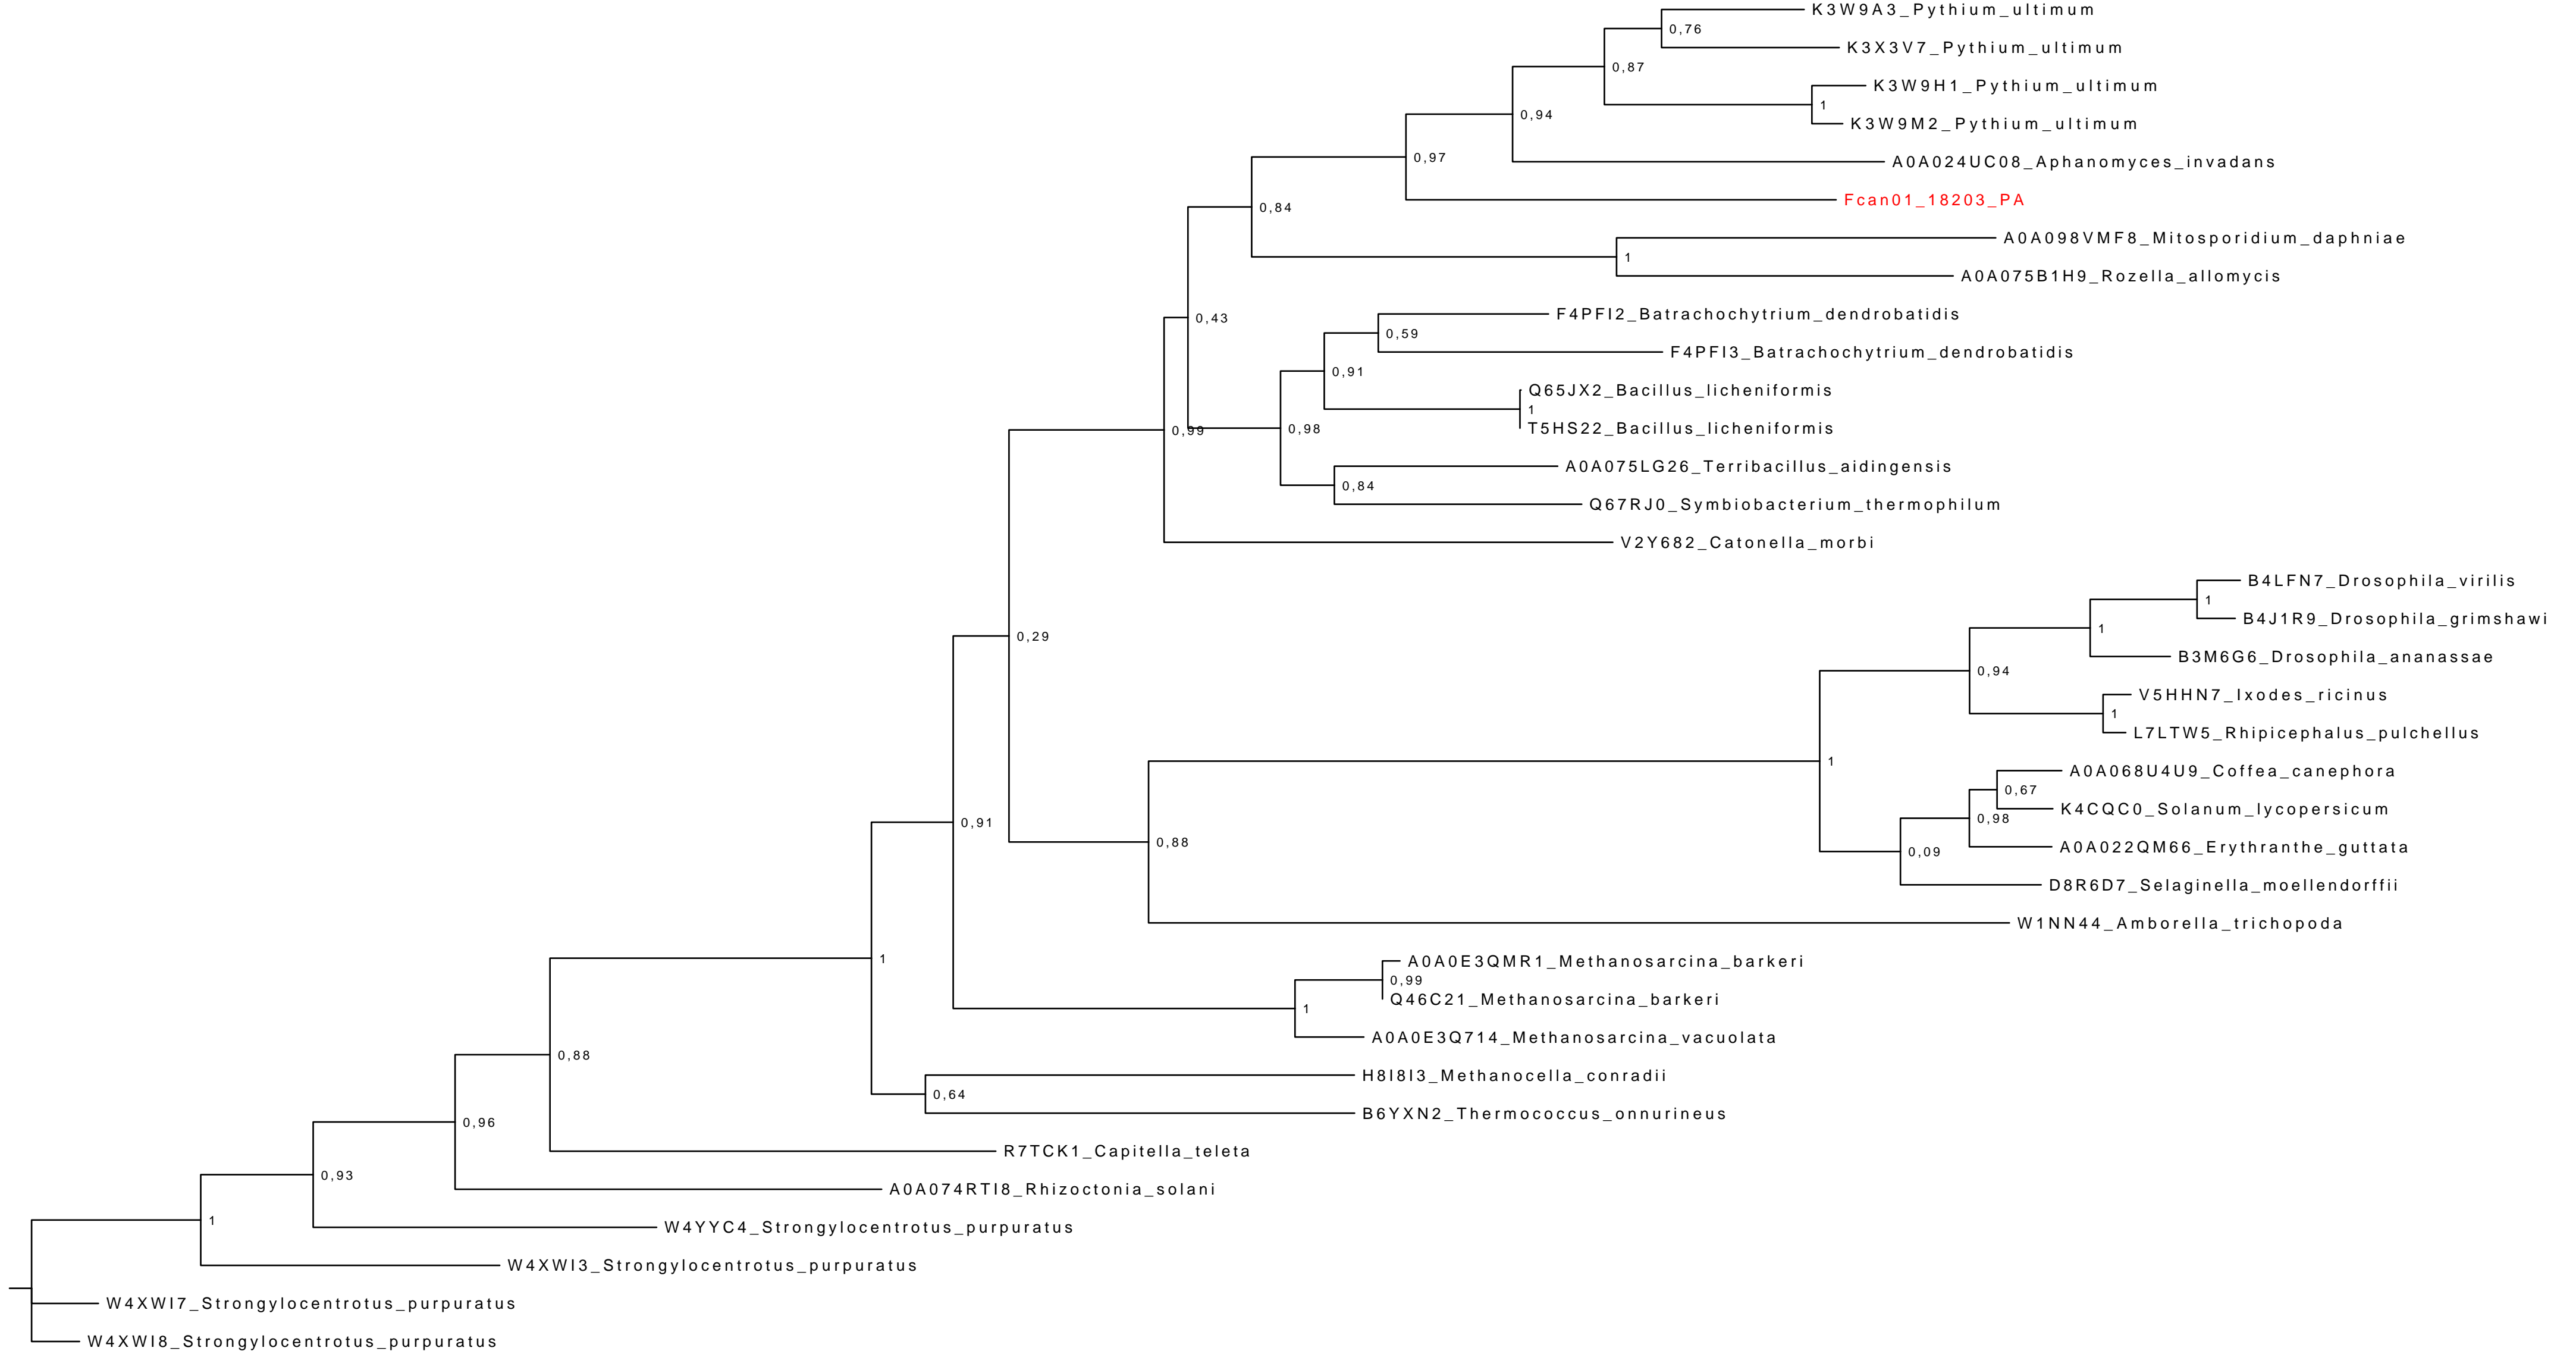

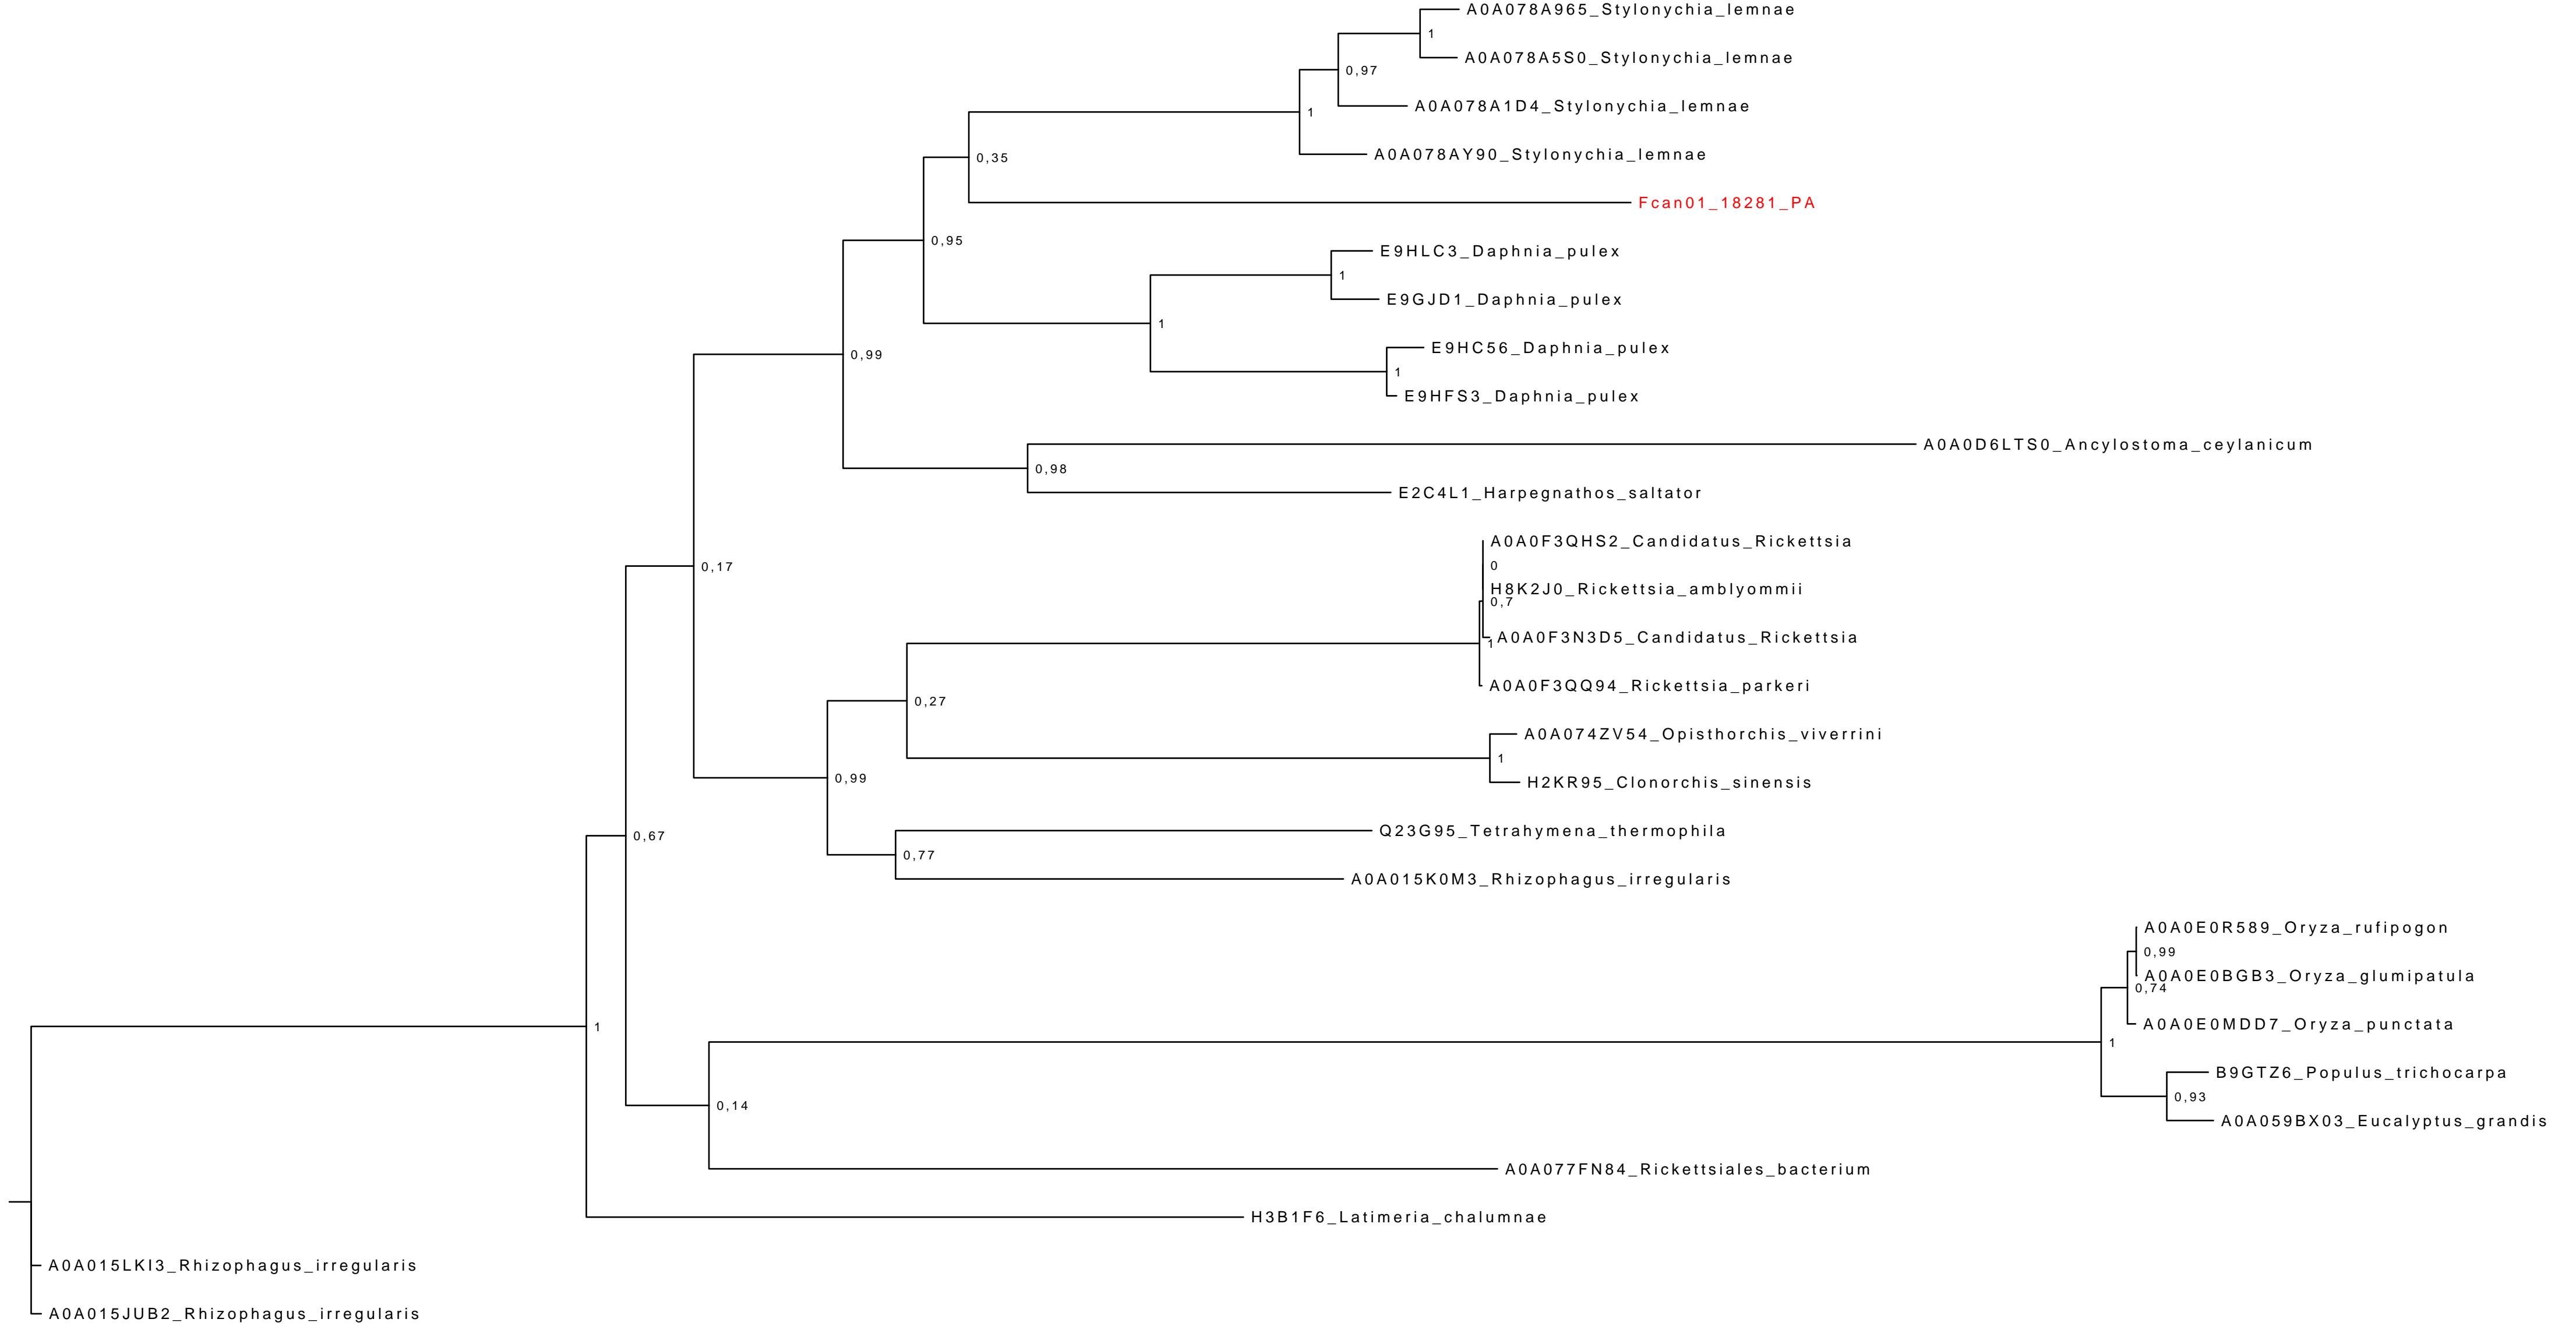



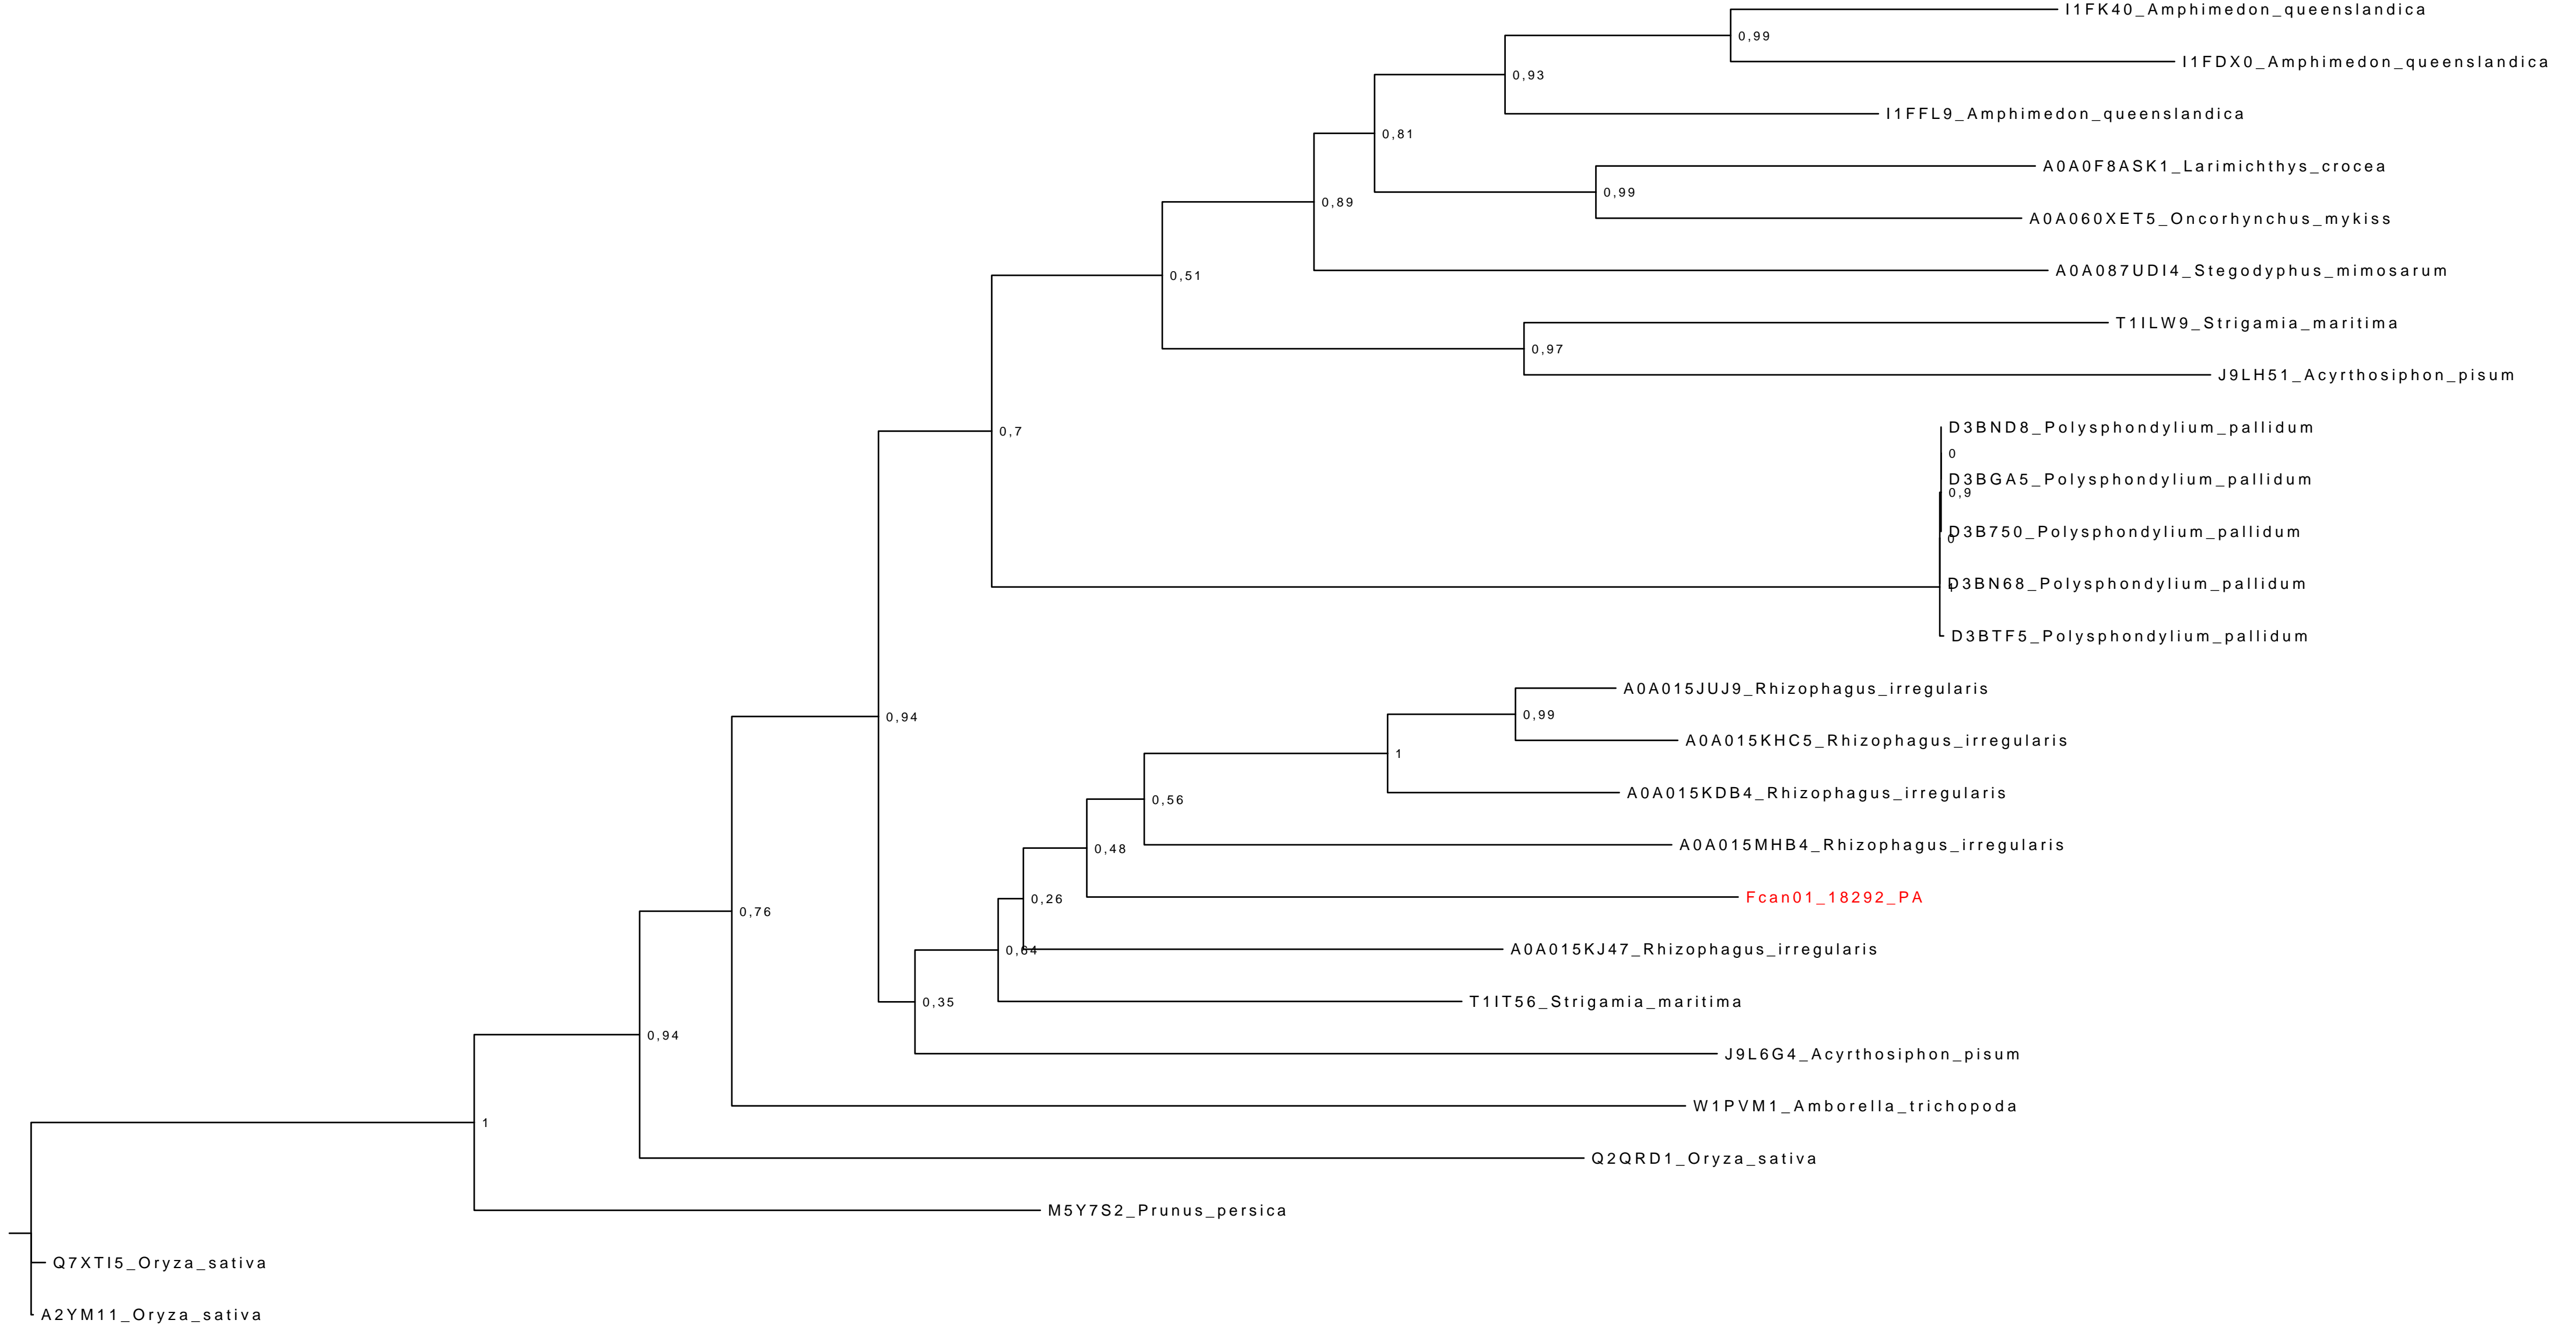

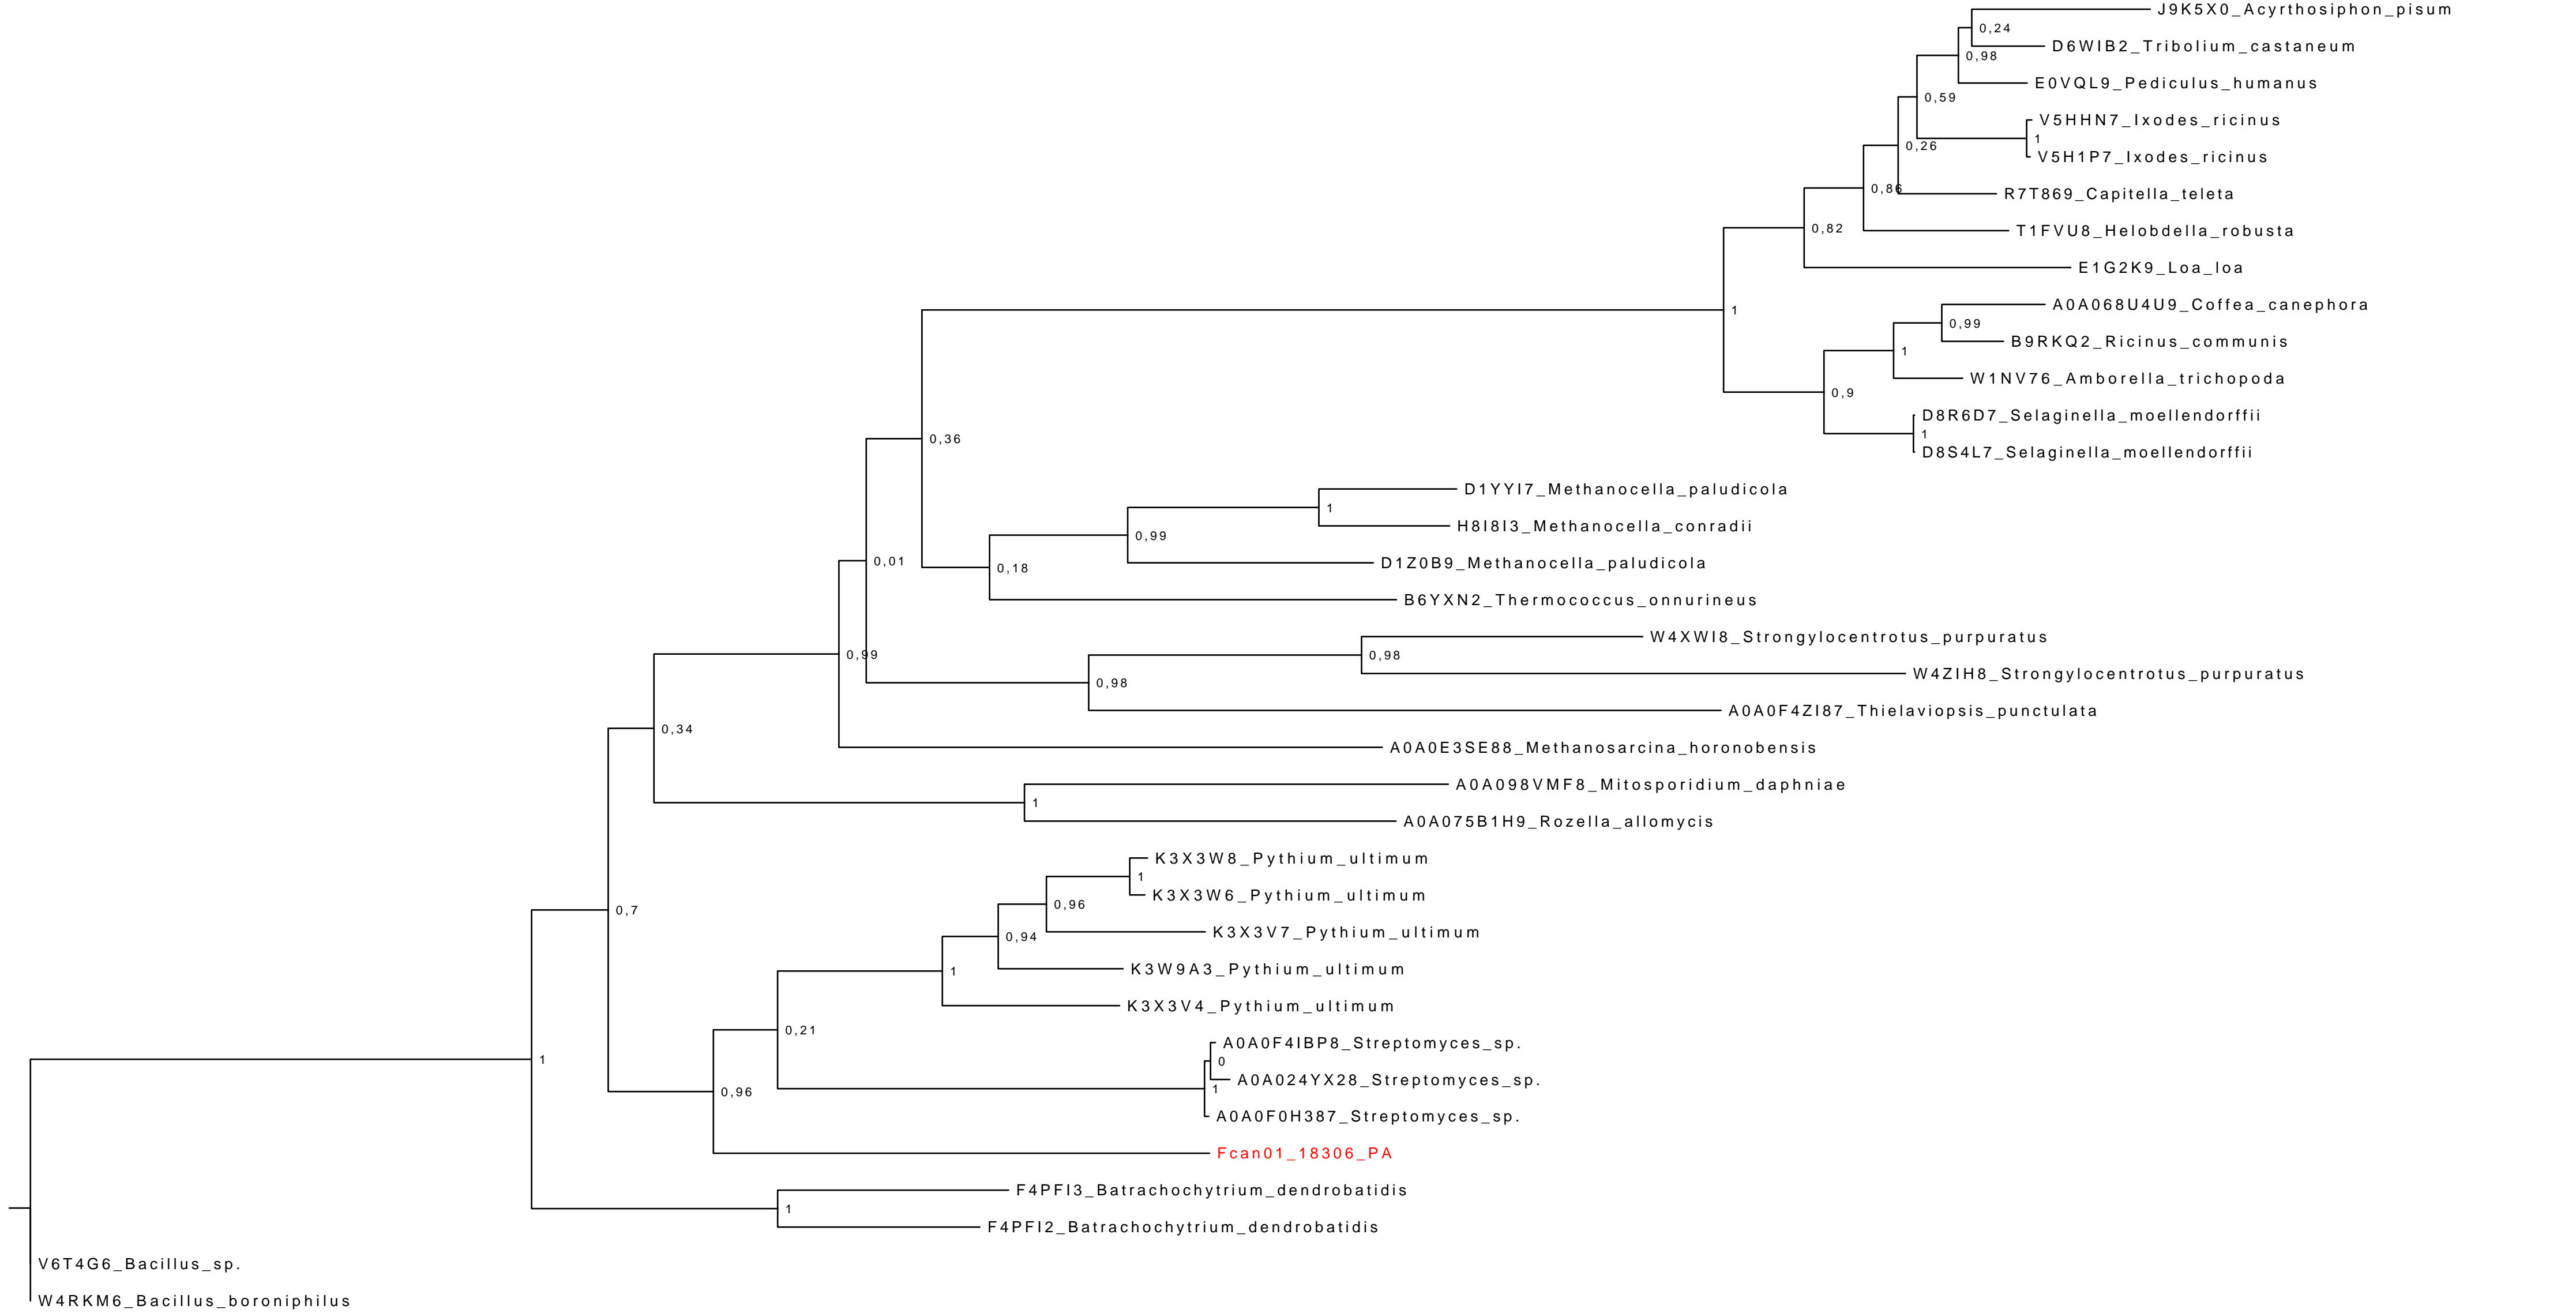

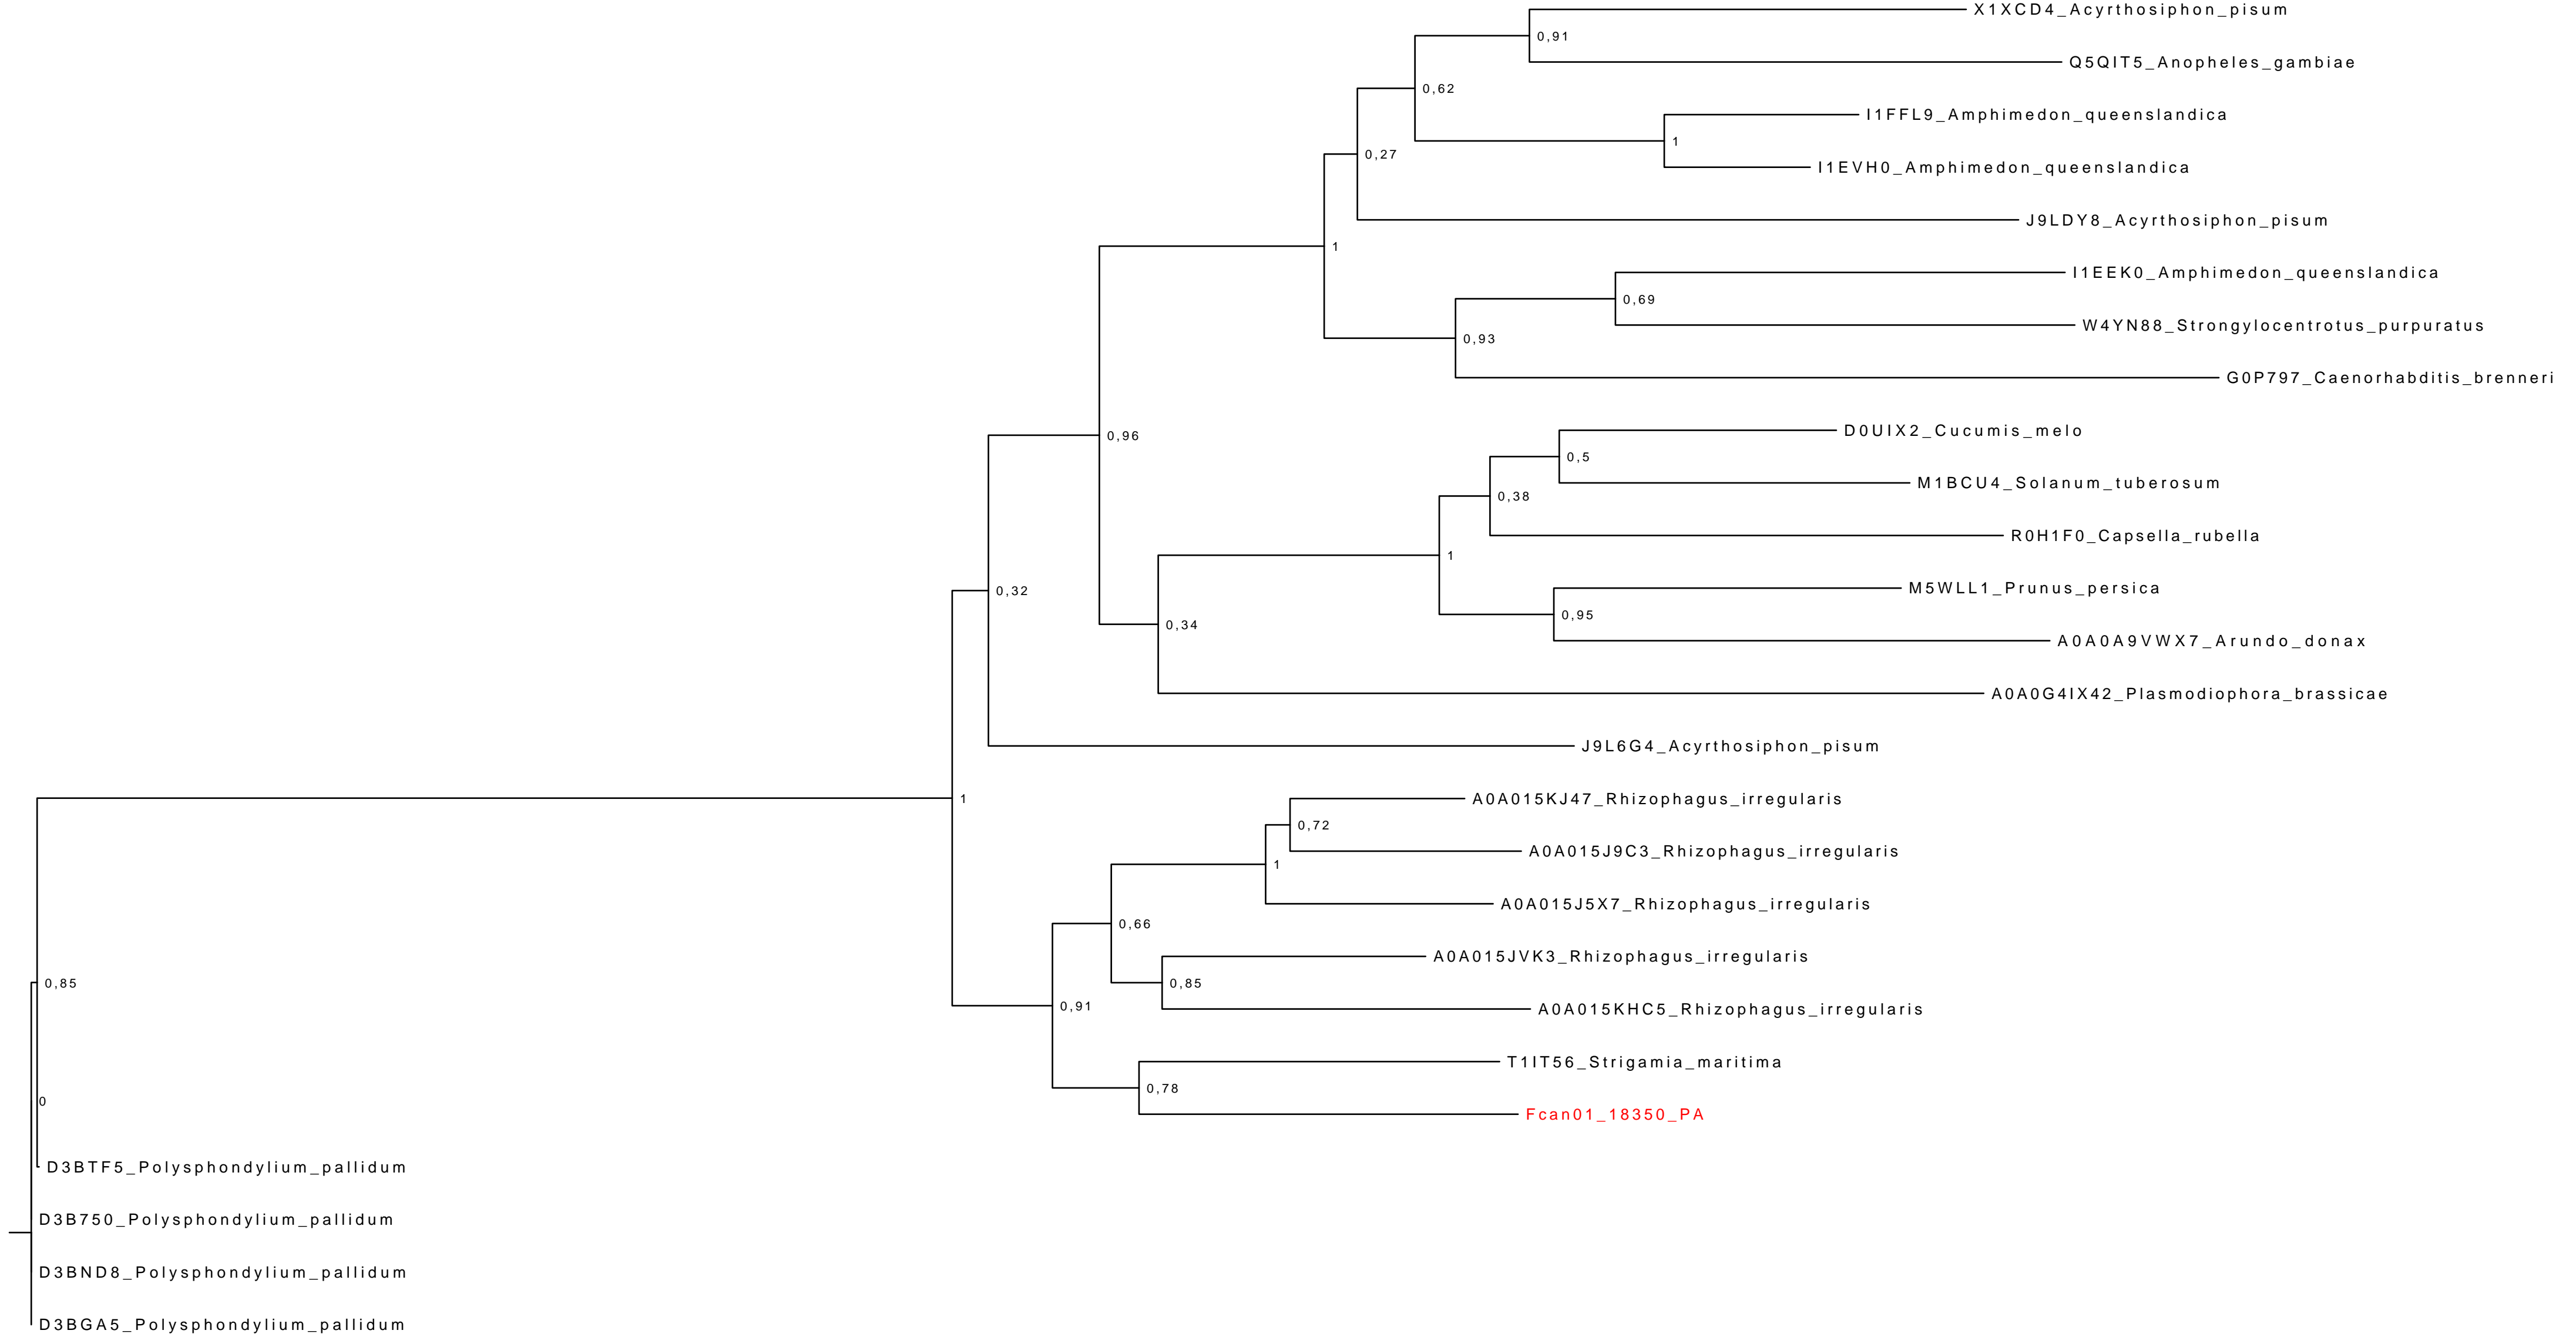

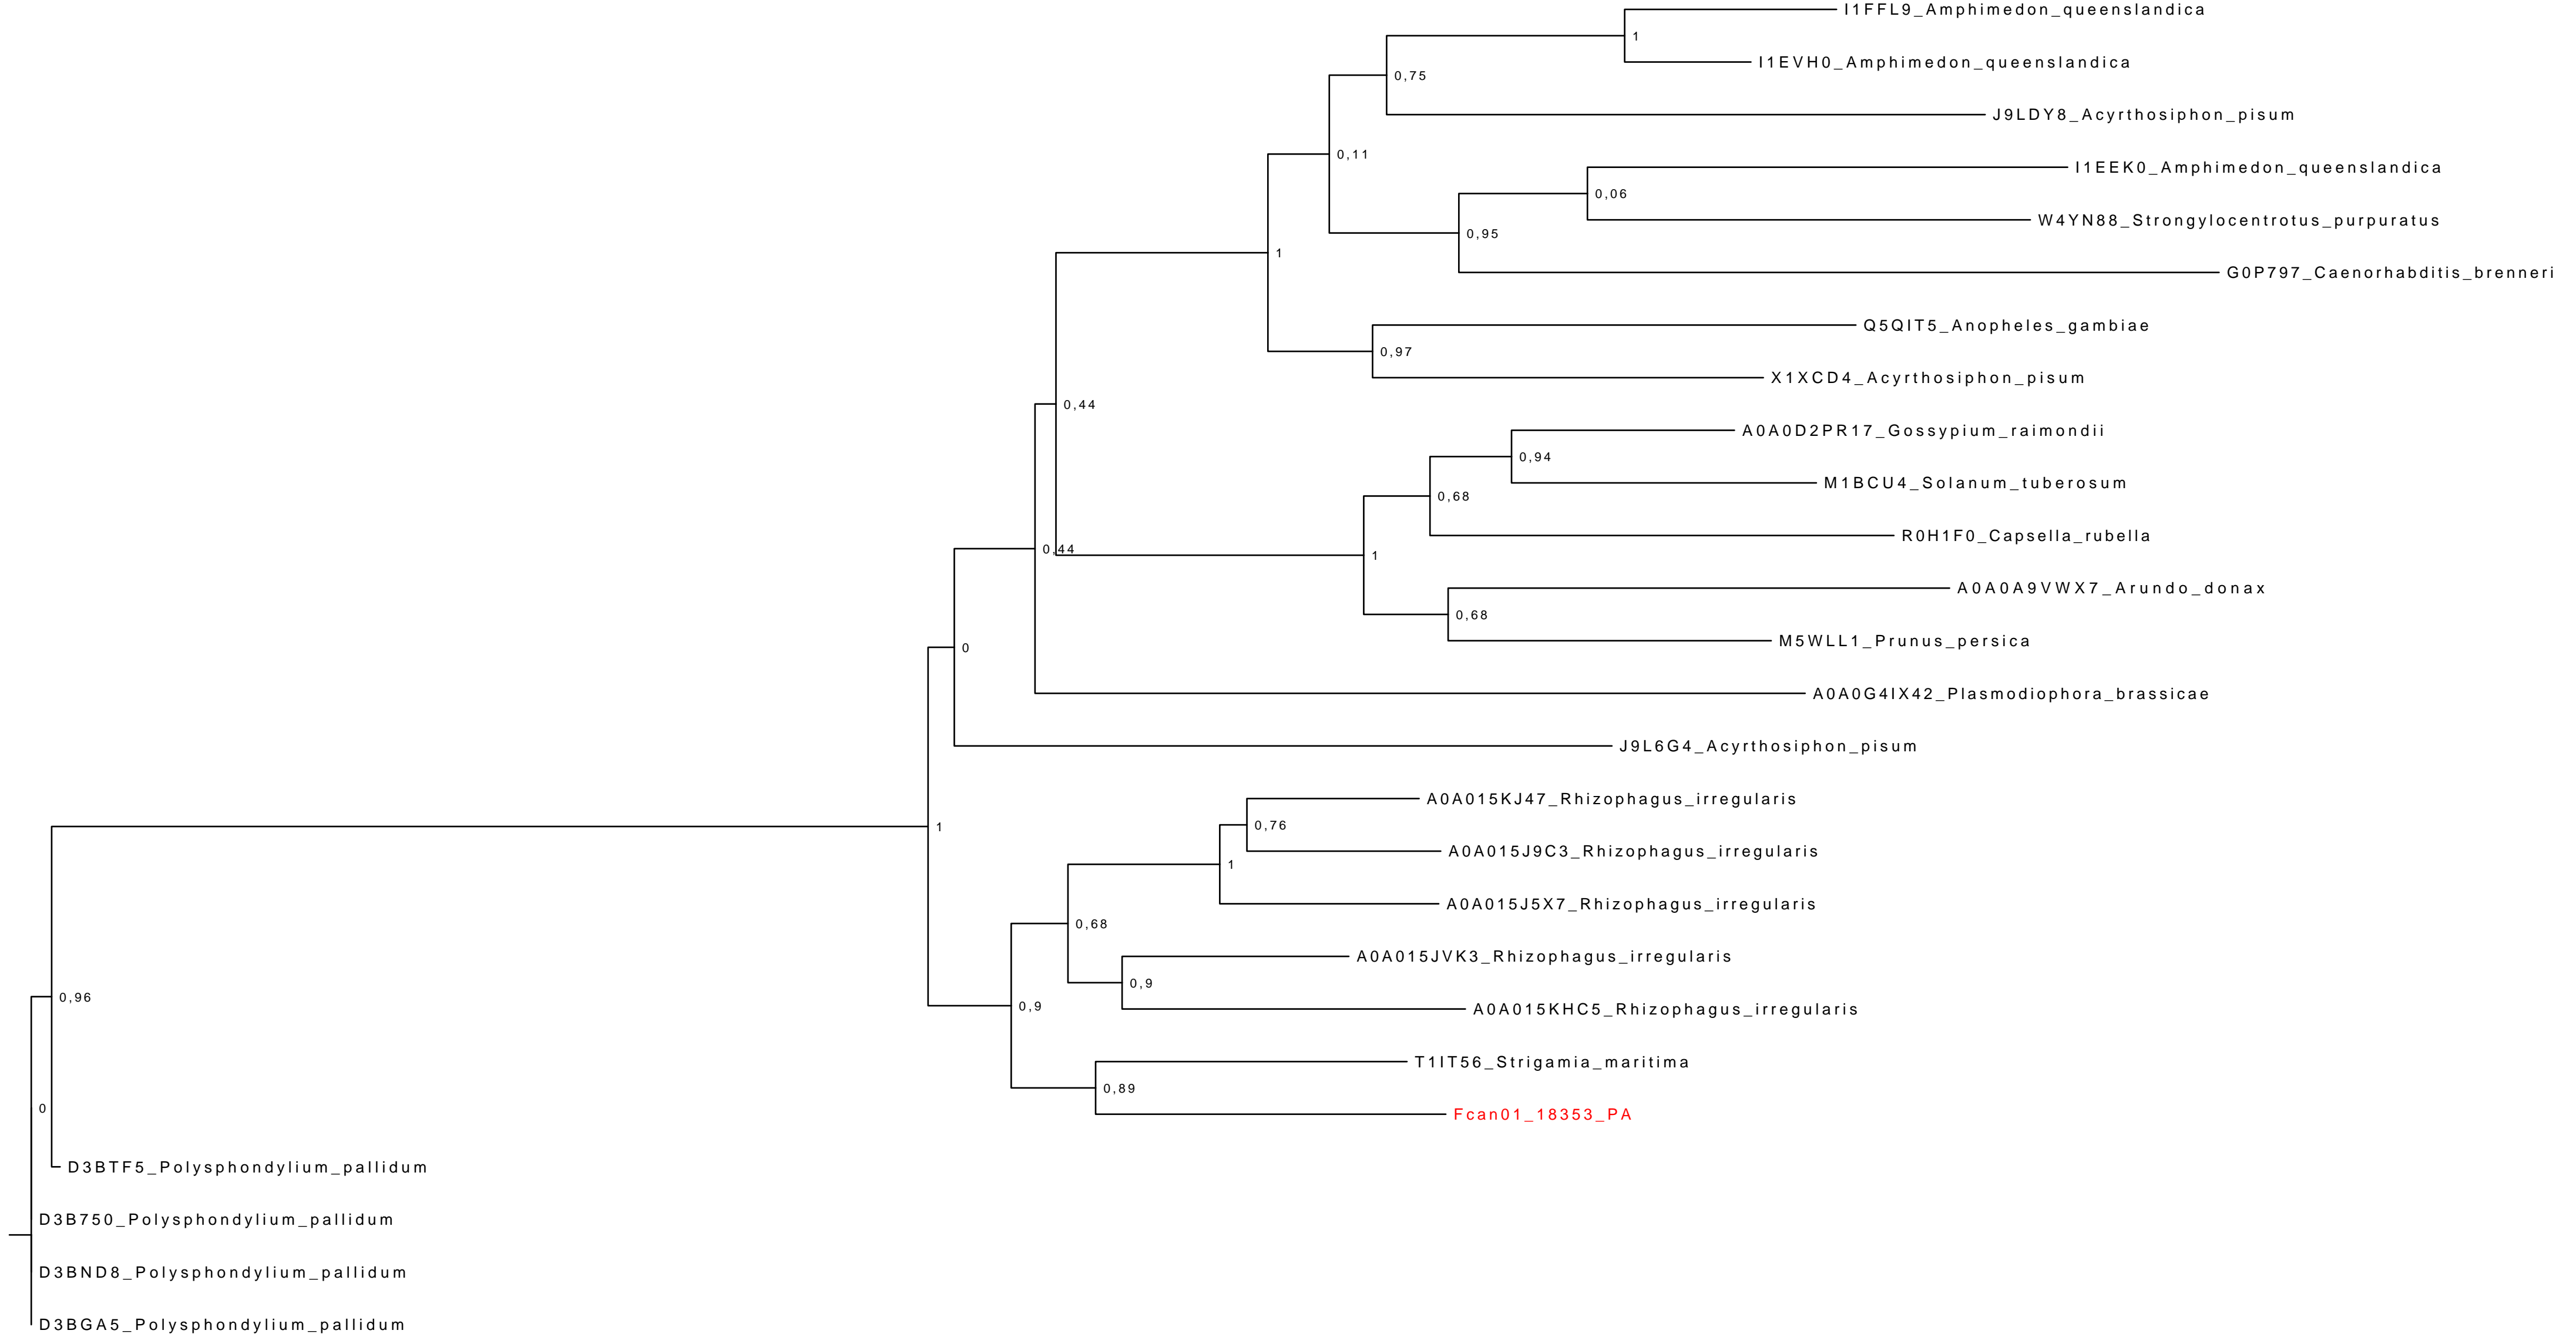

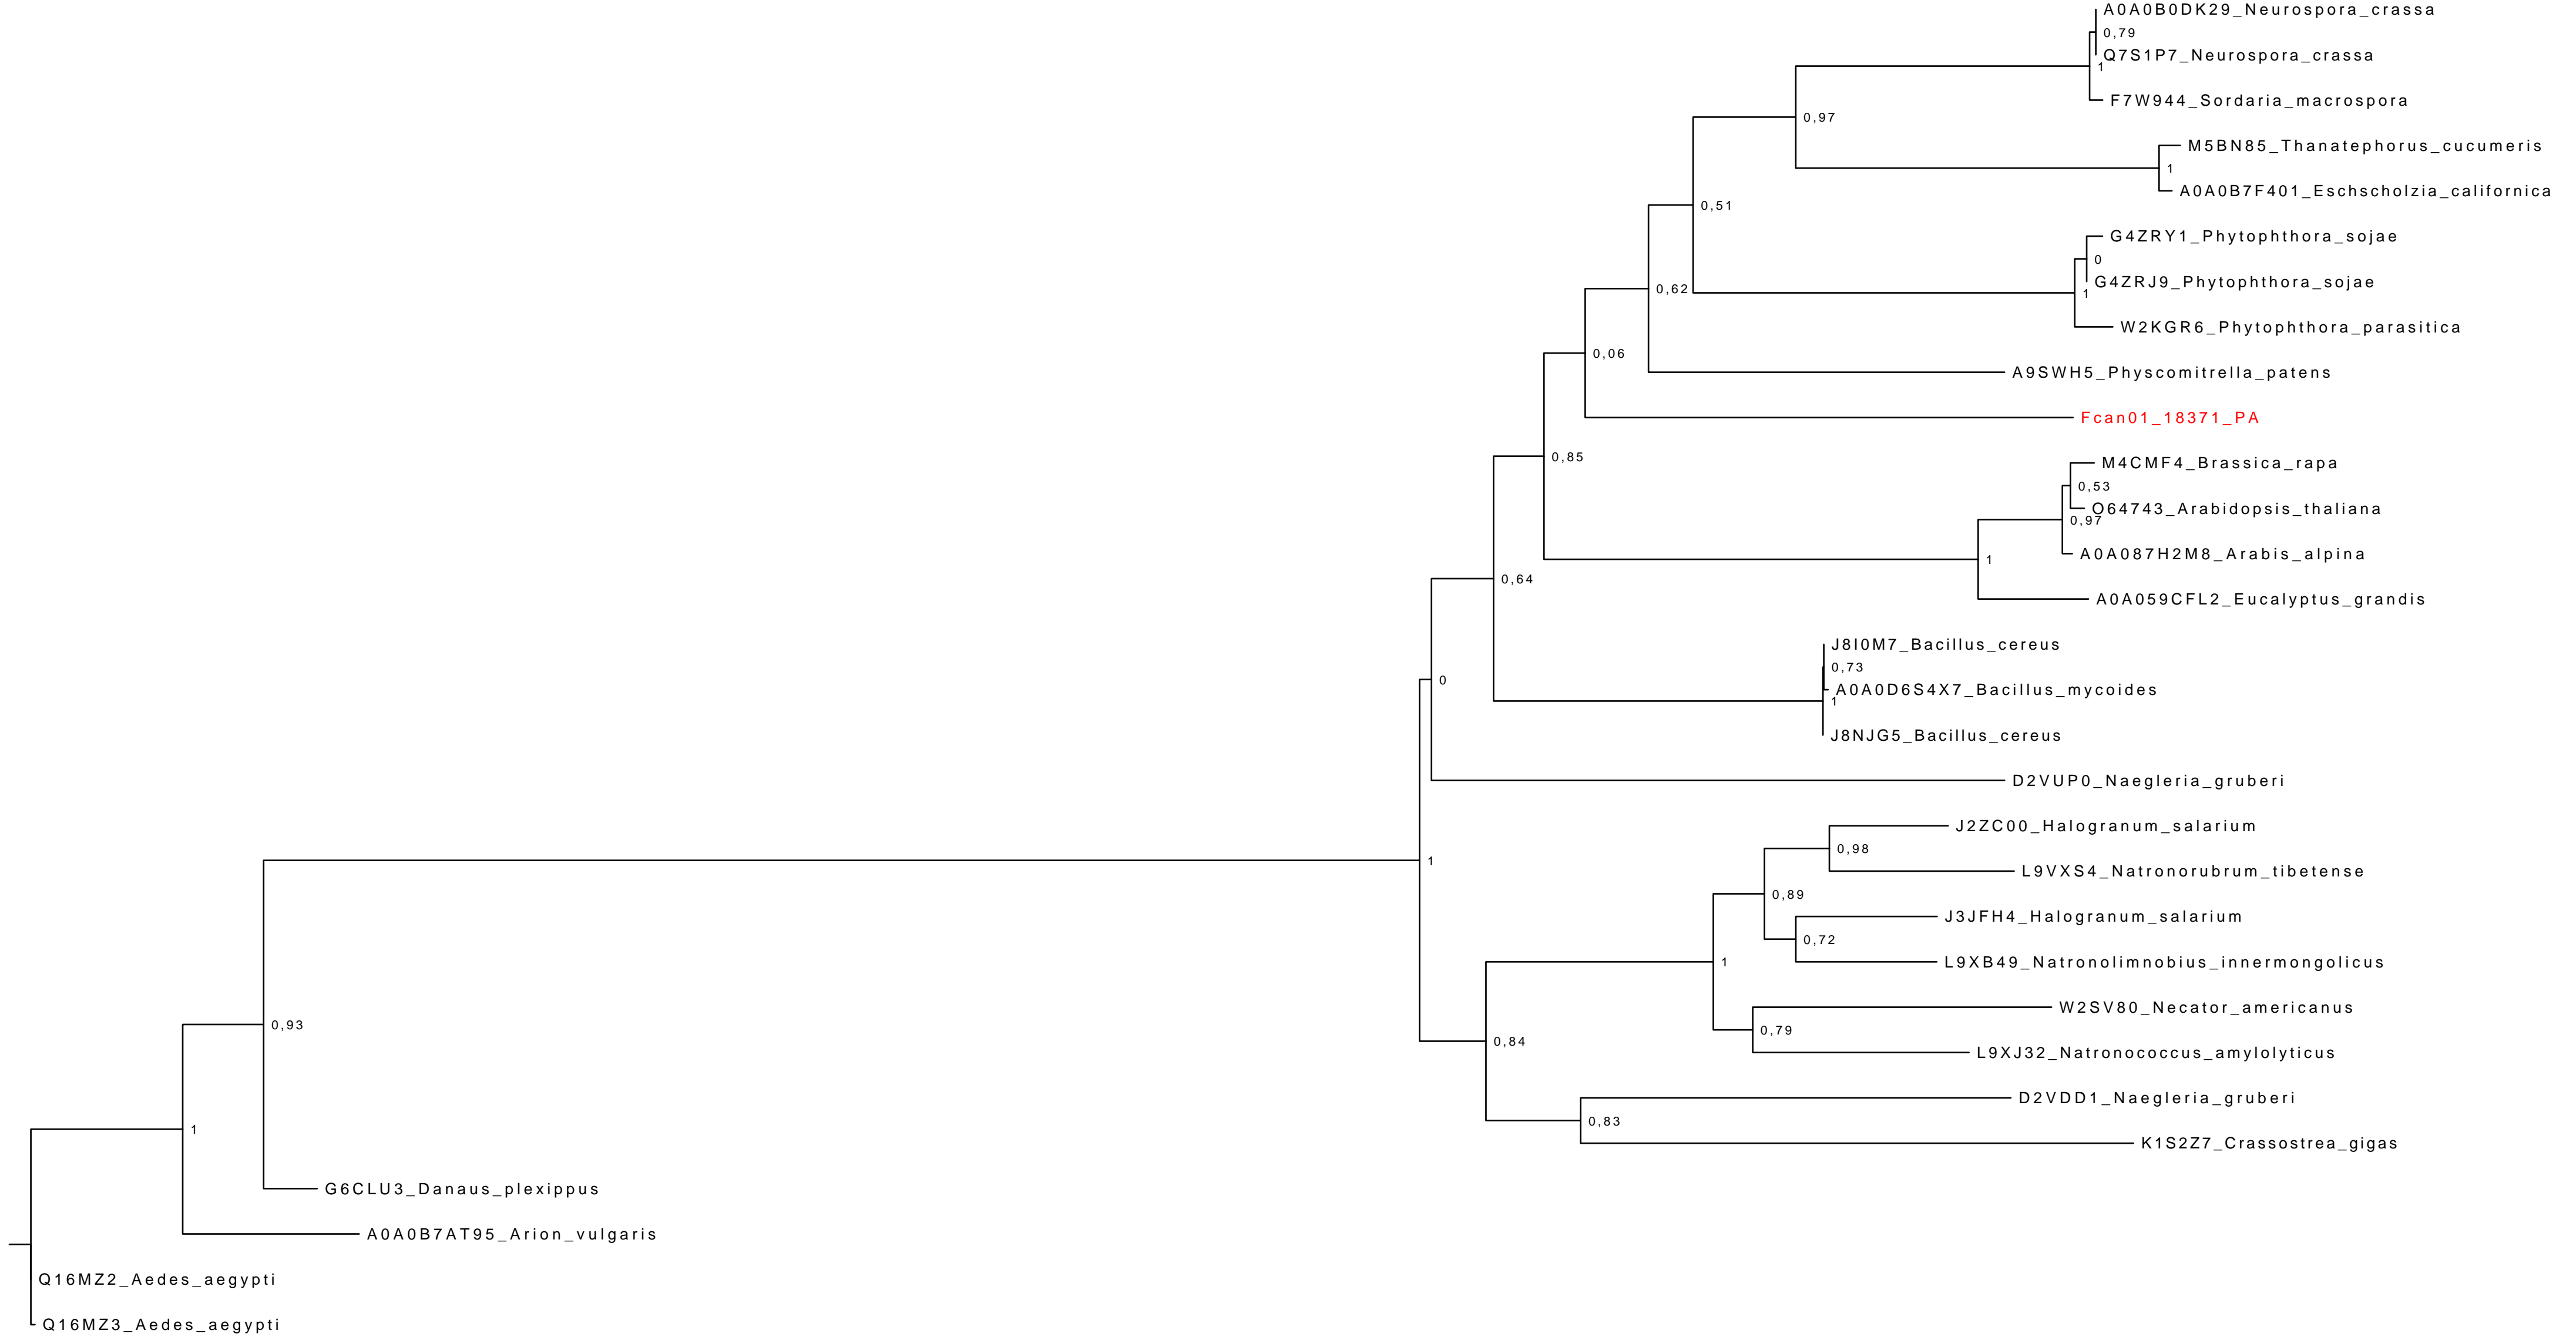

0.6

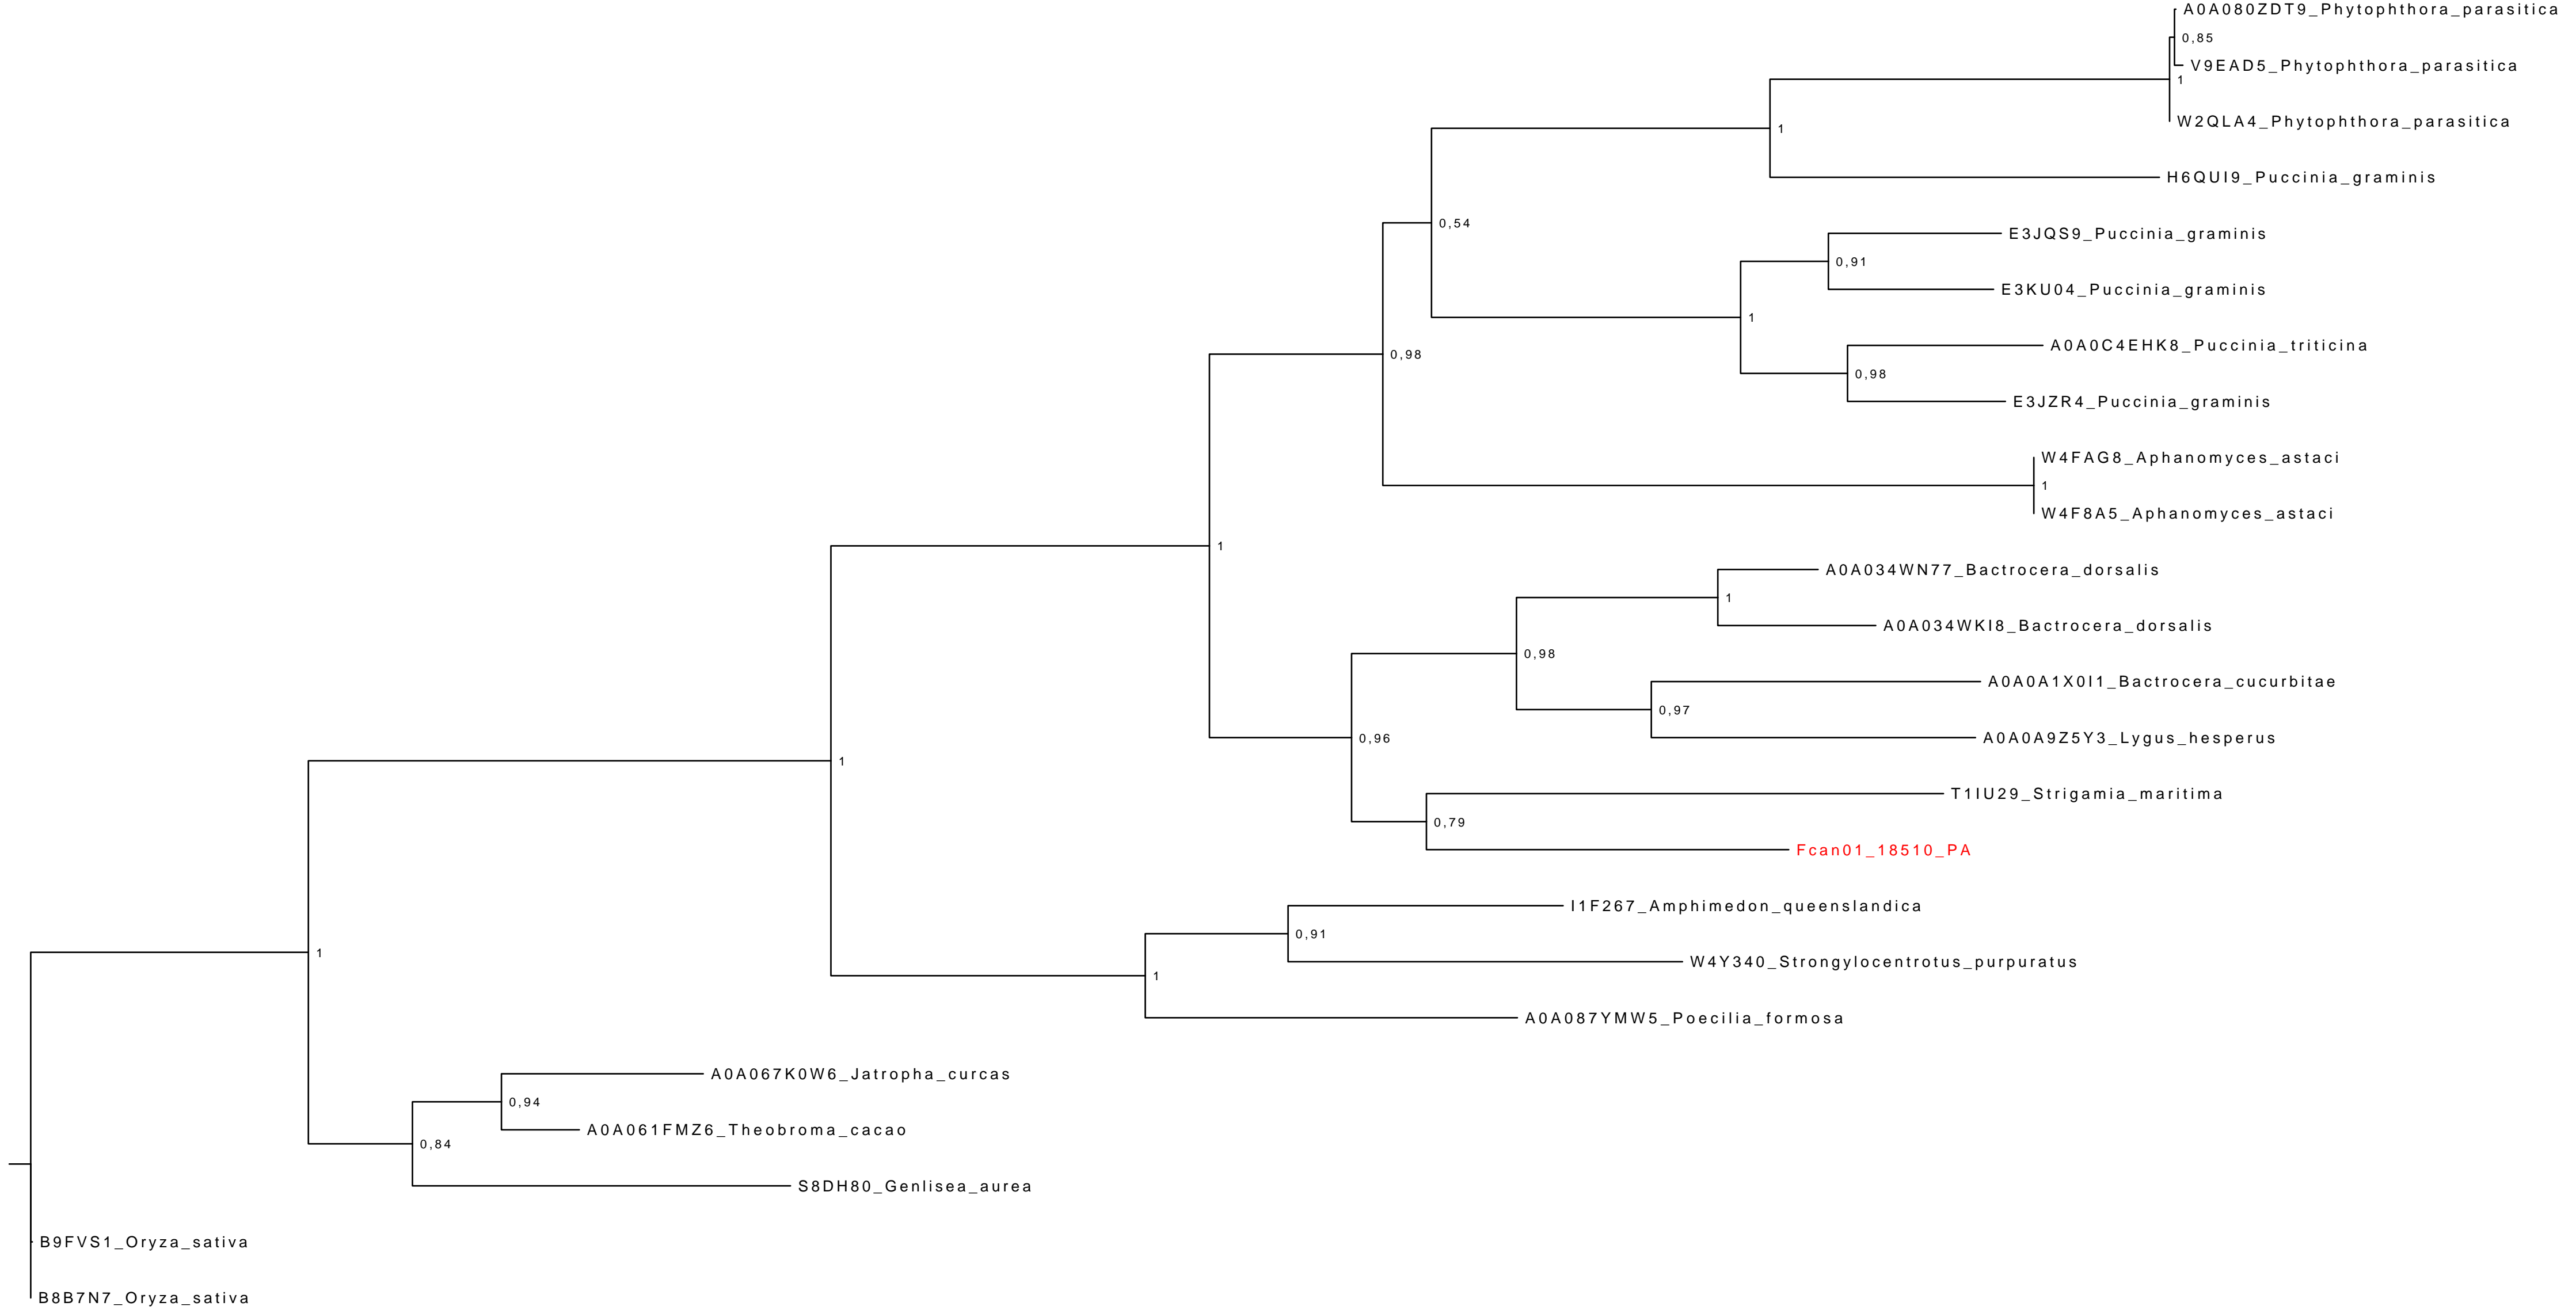

0.4

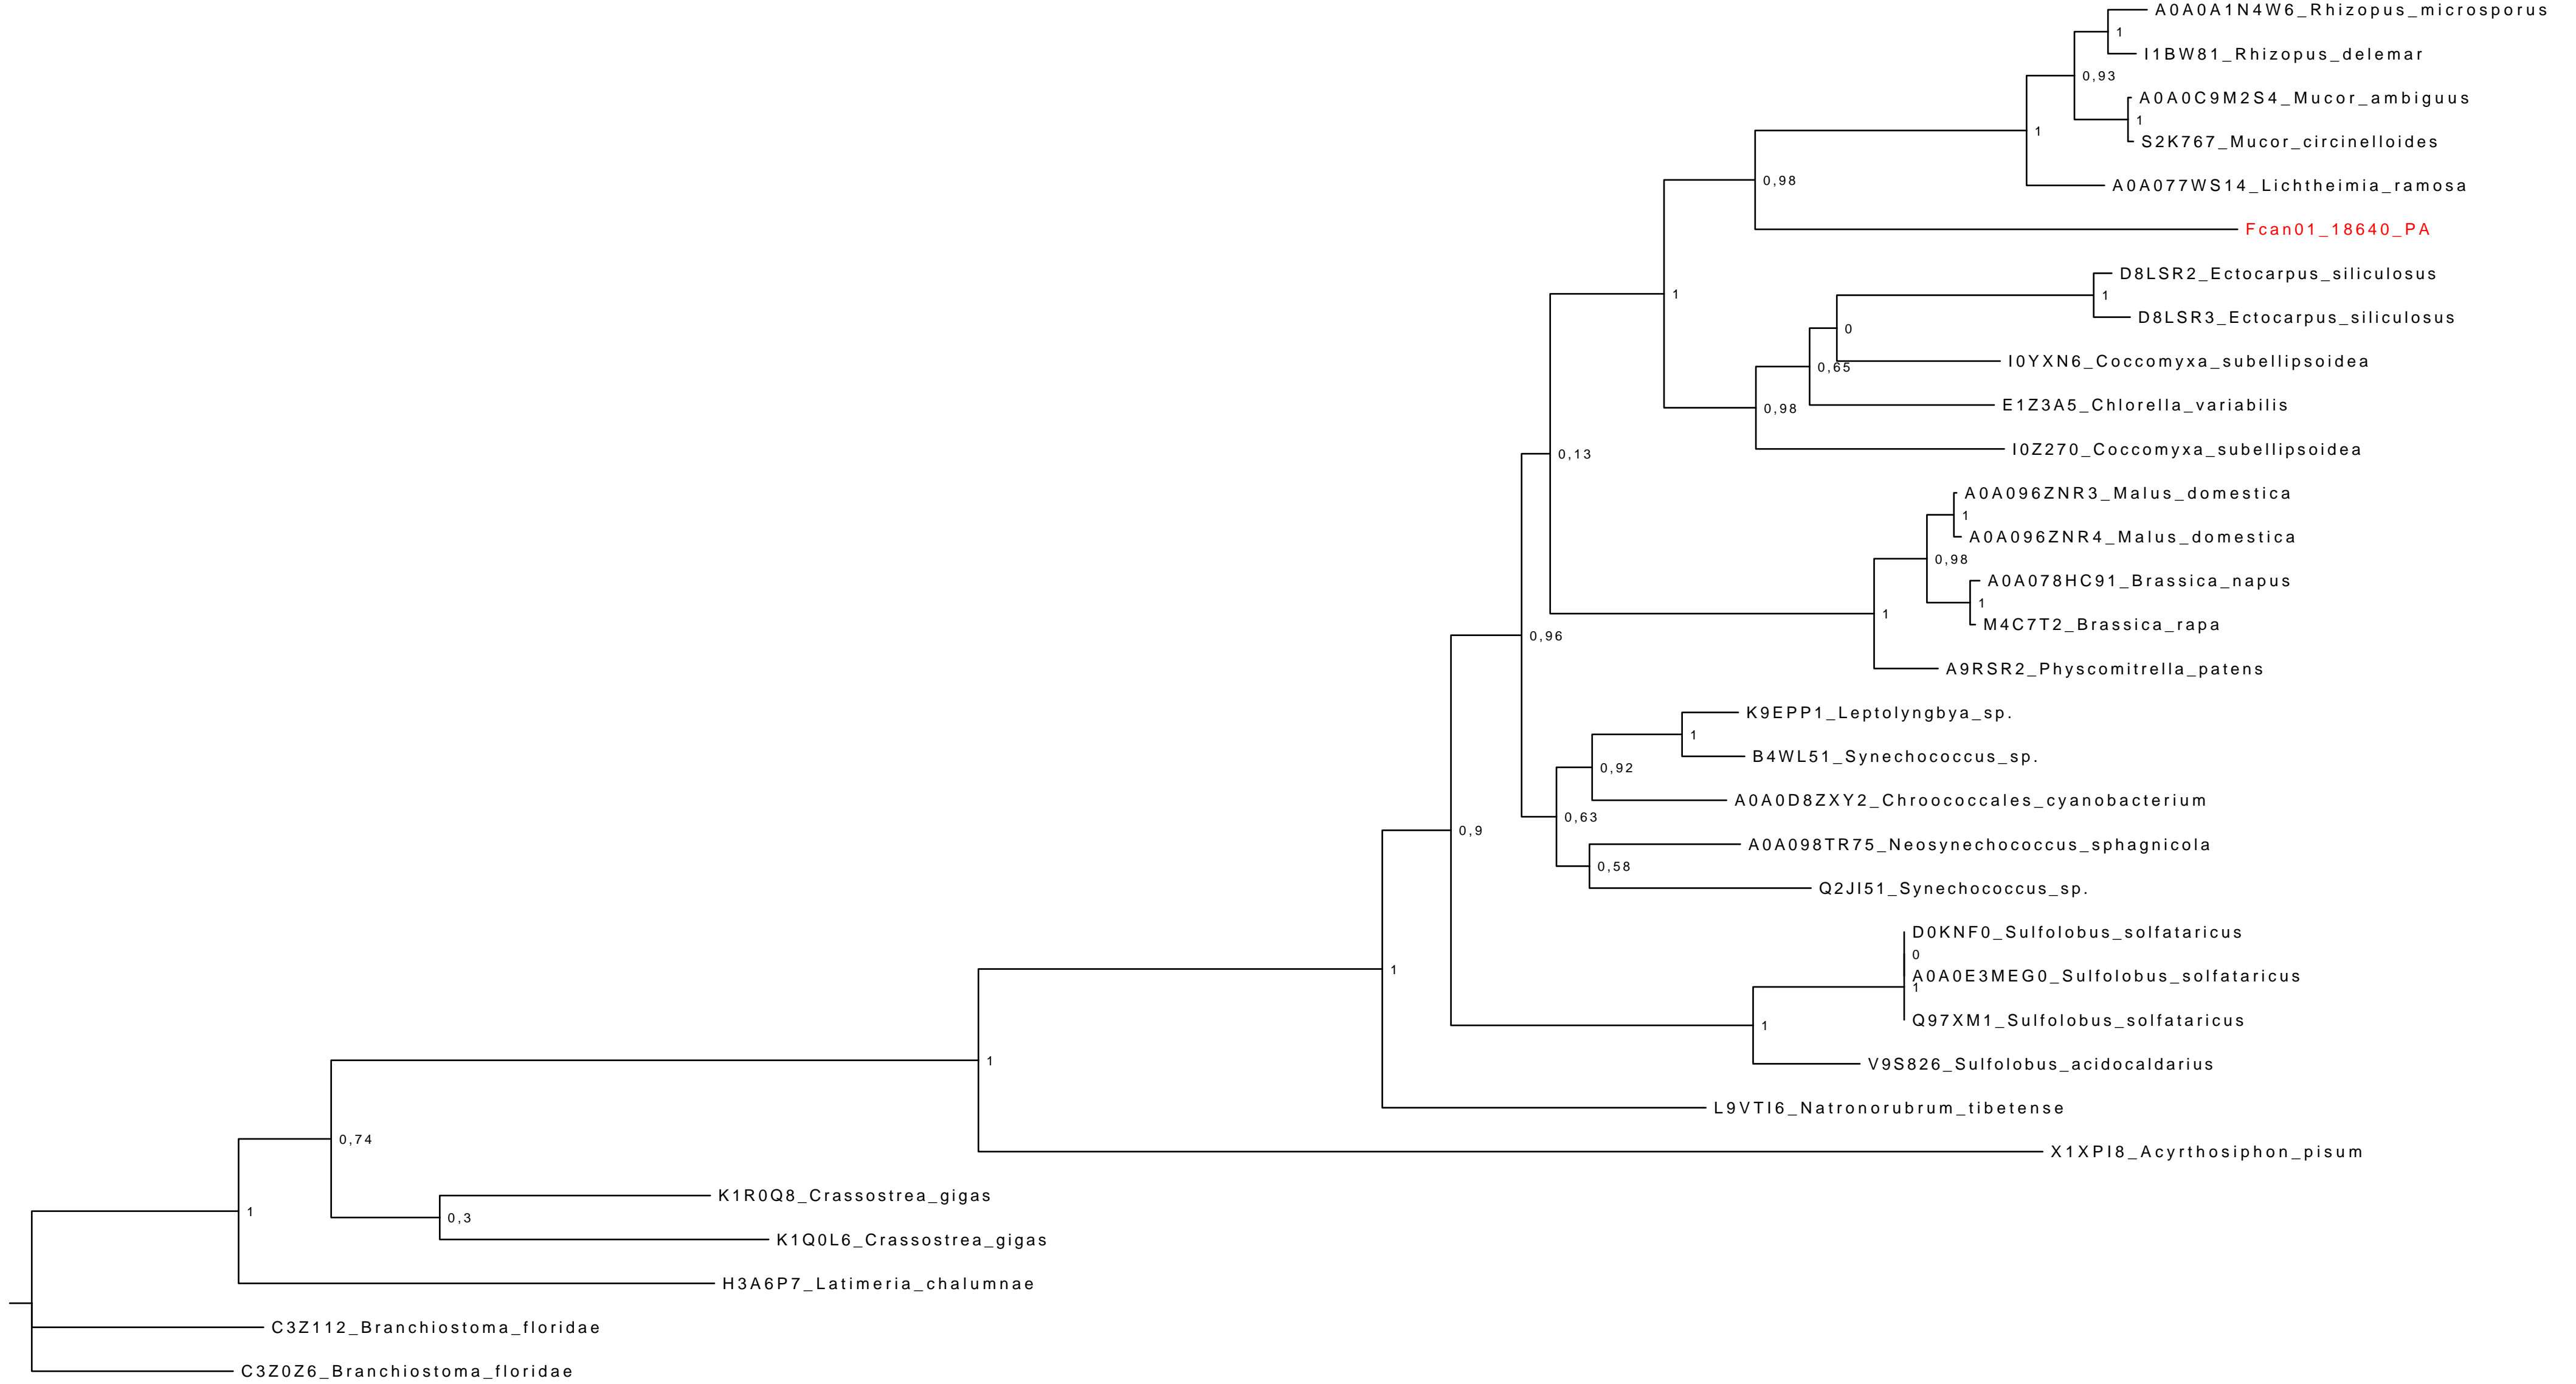

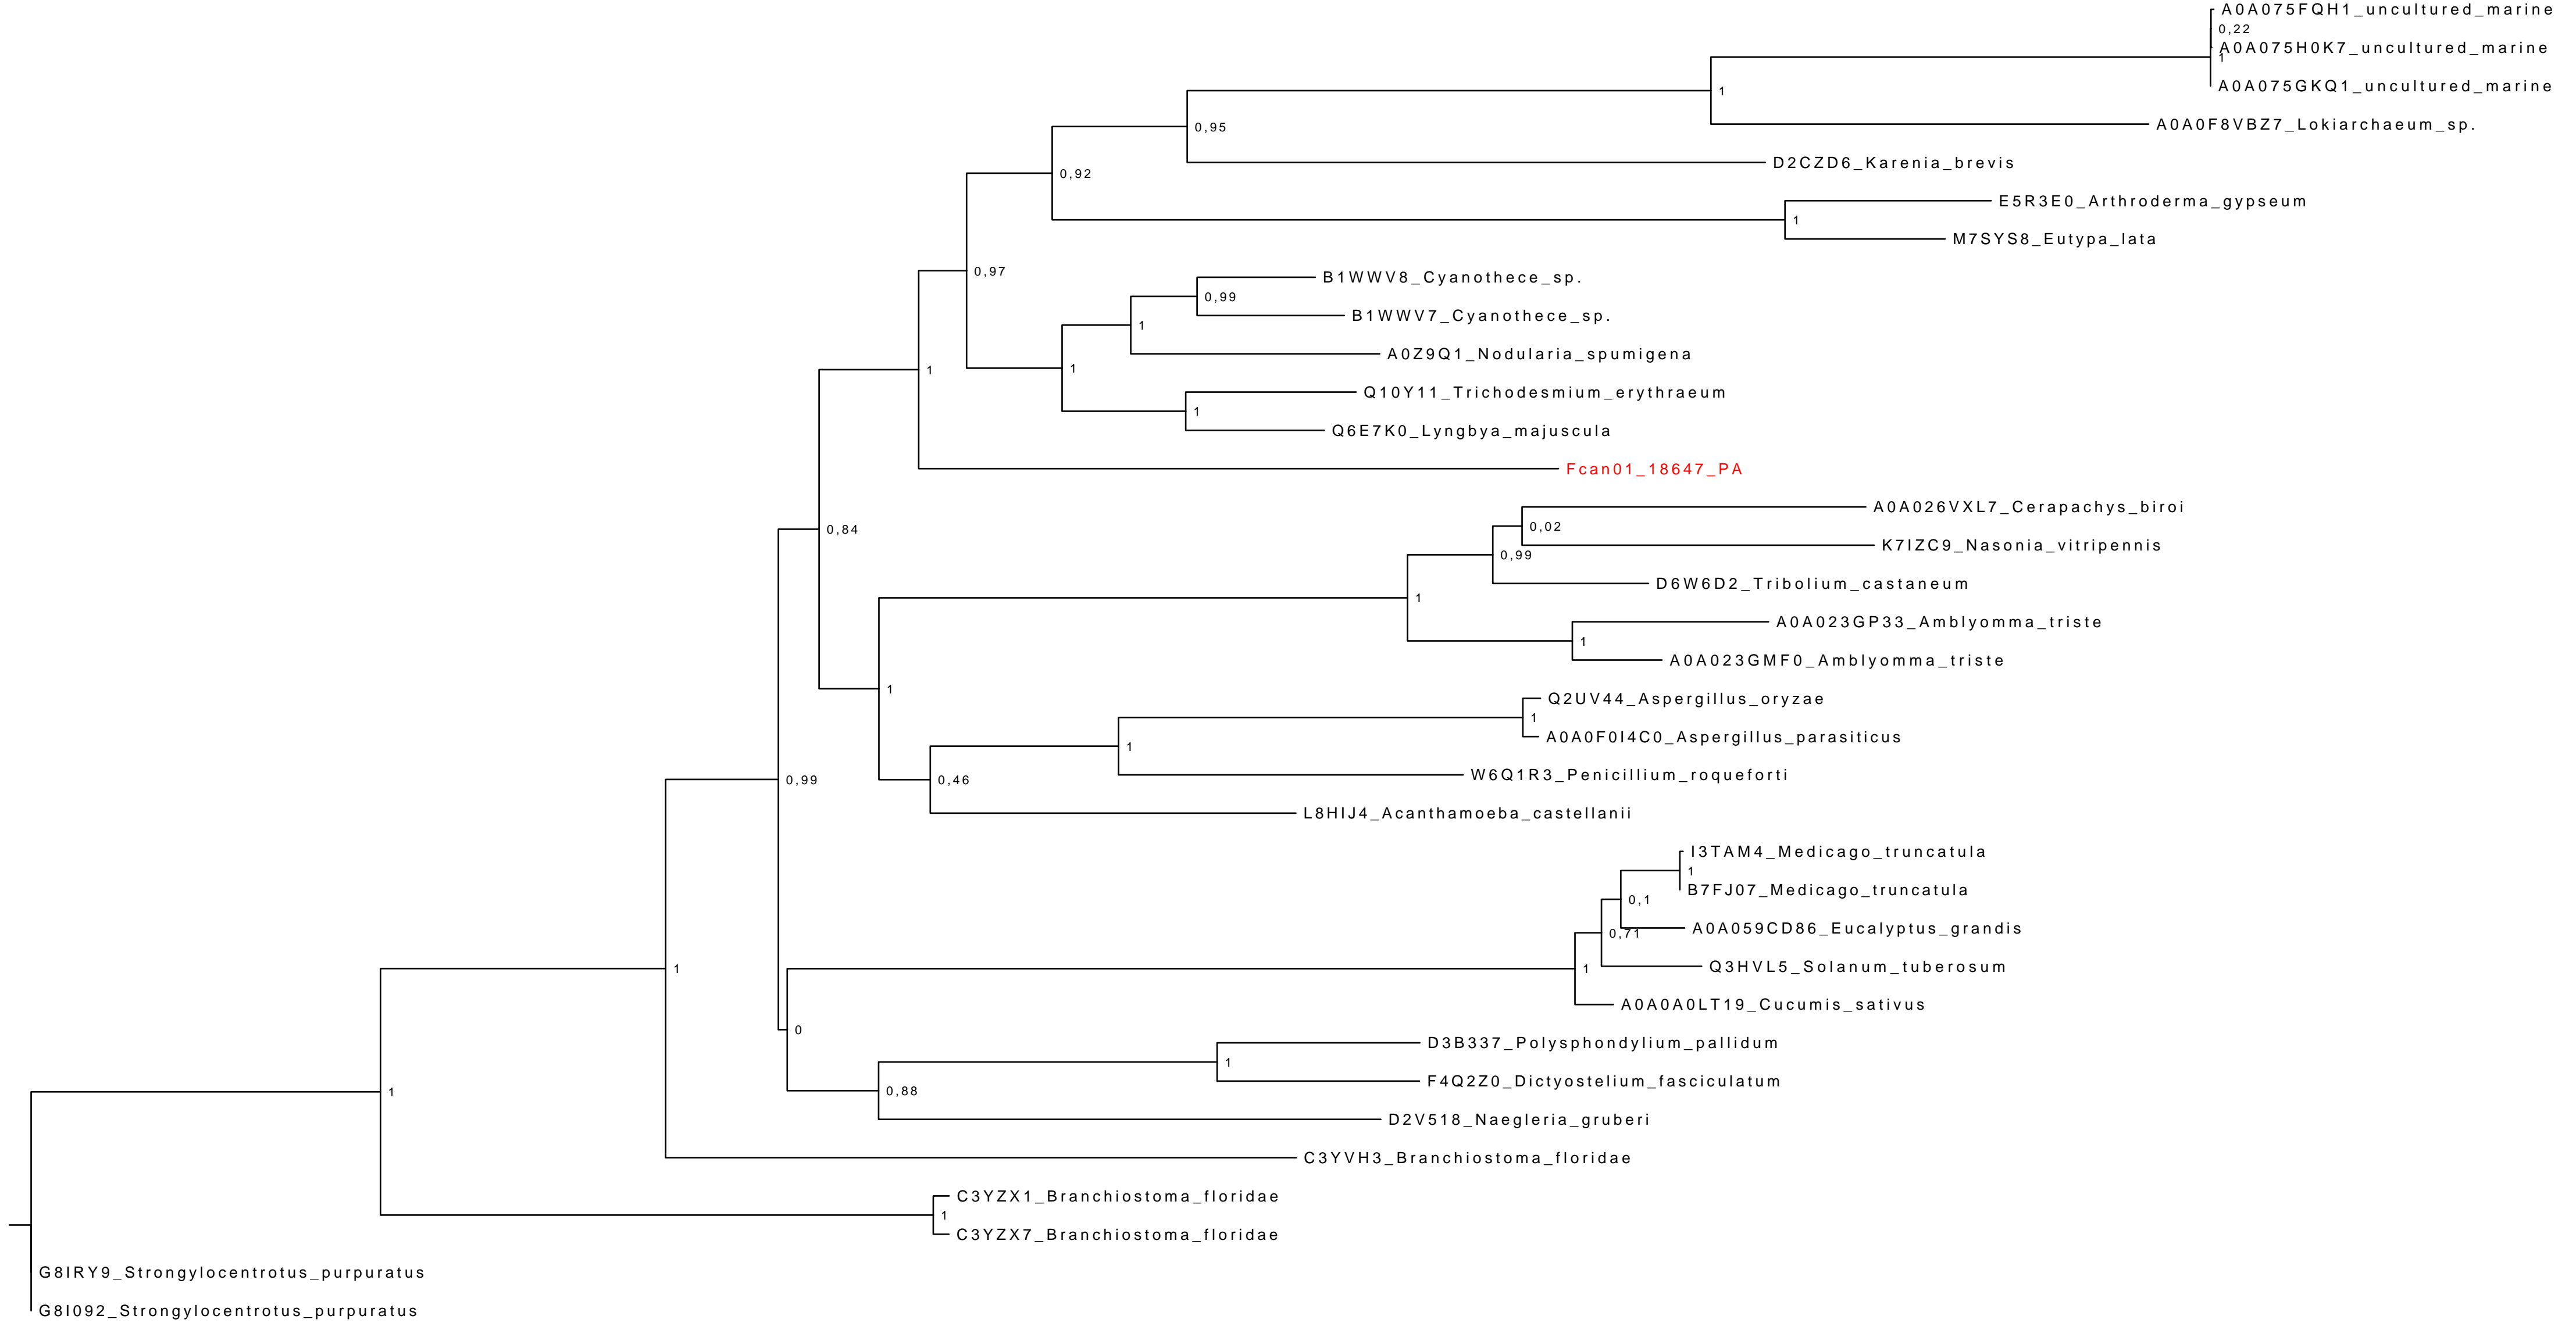



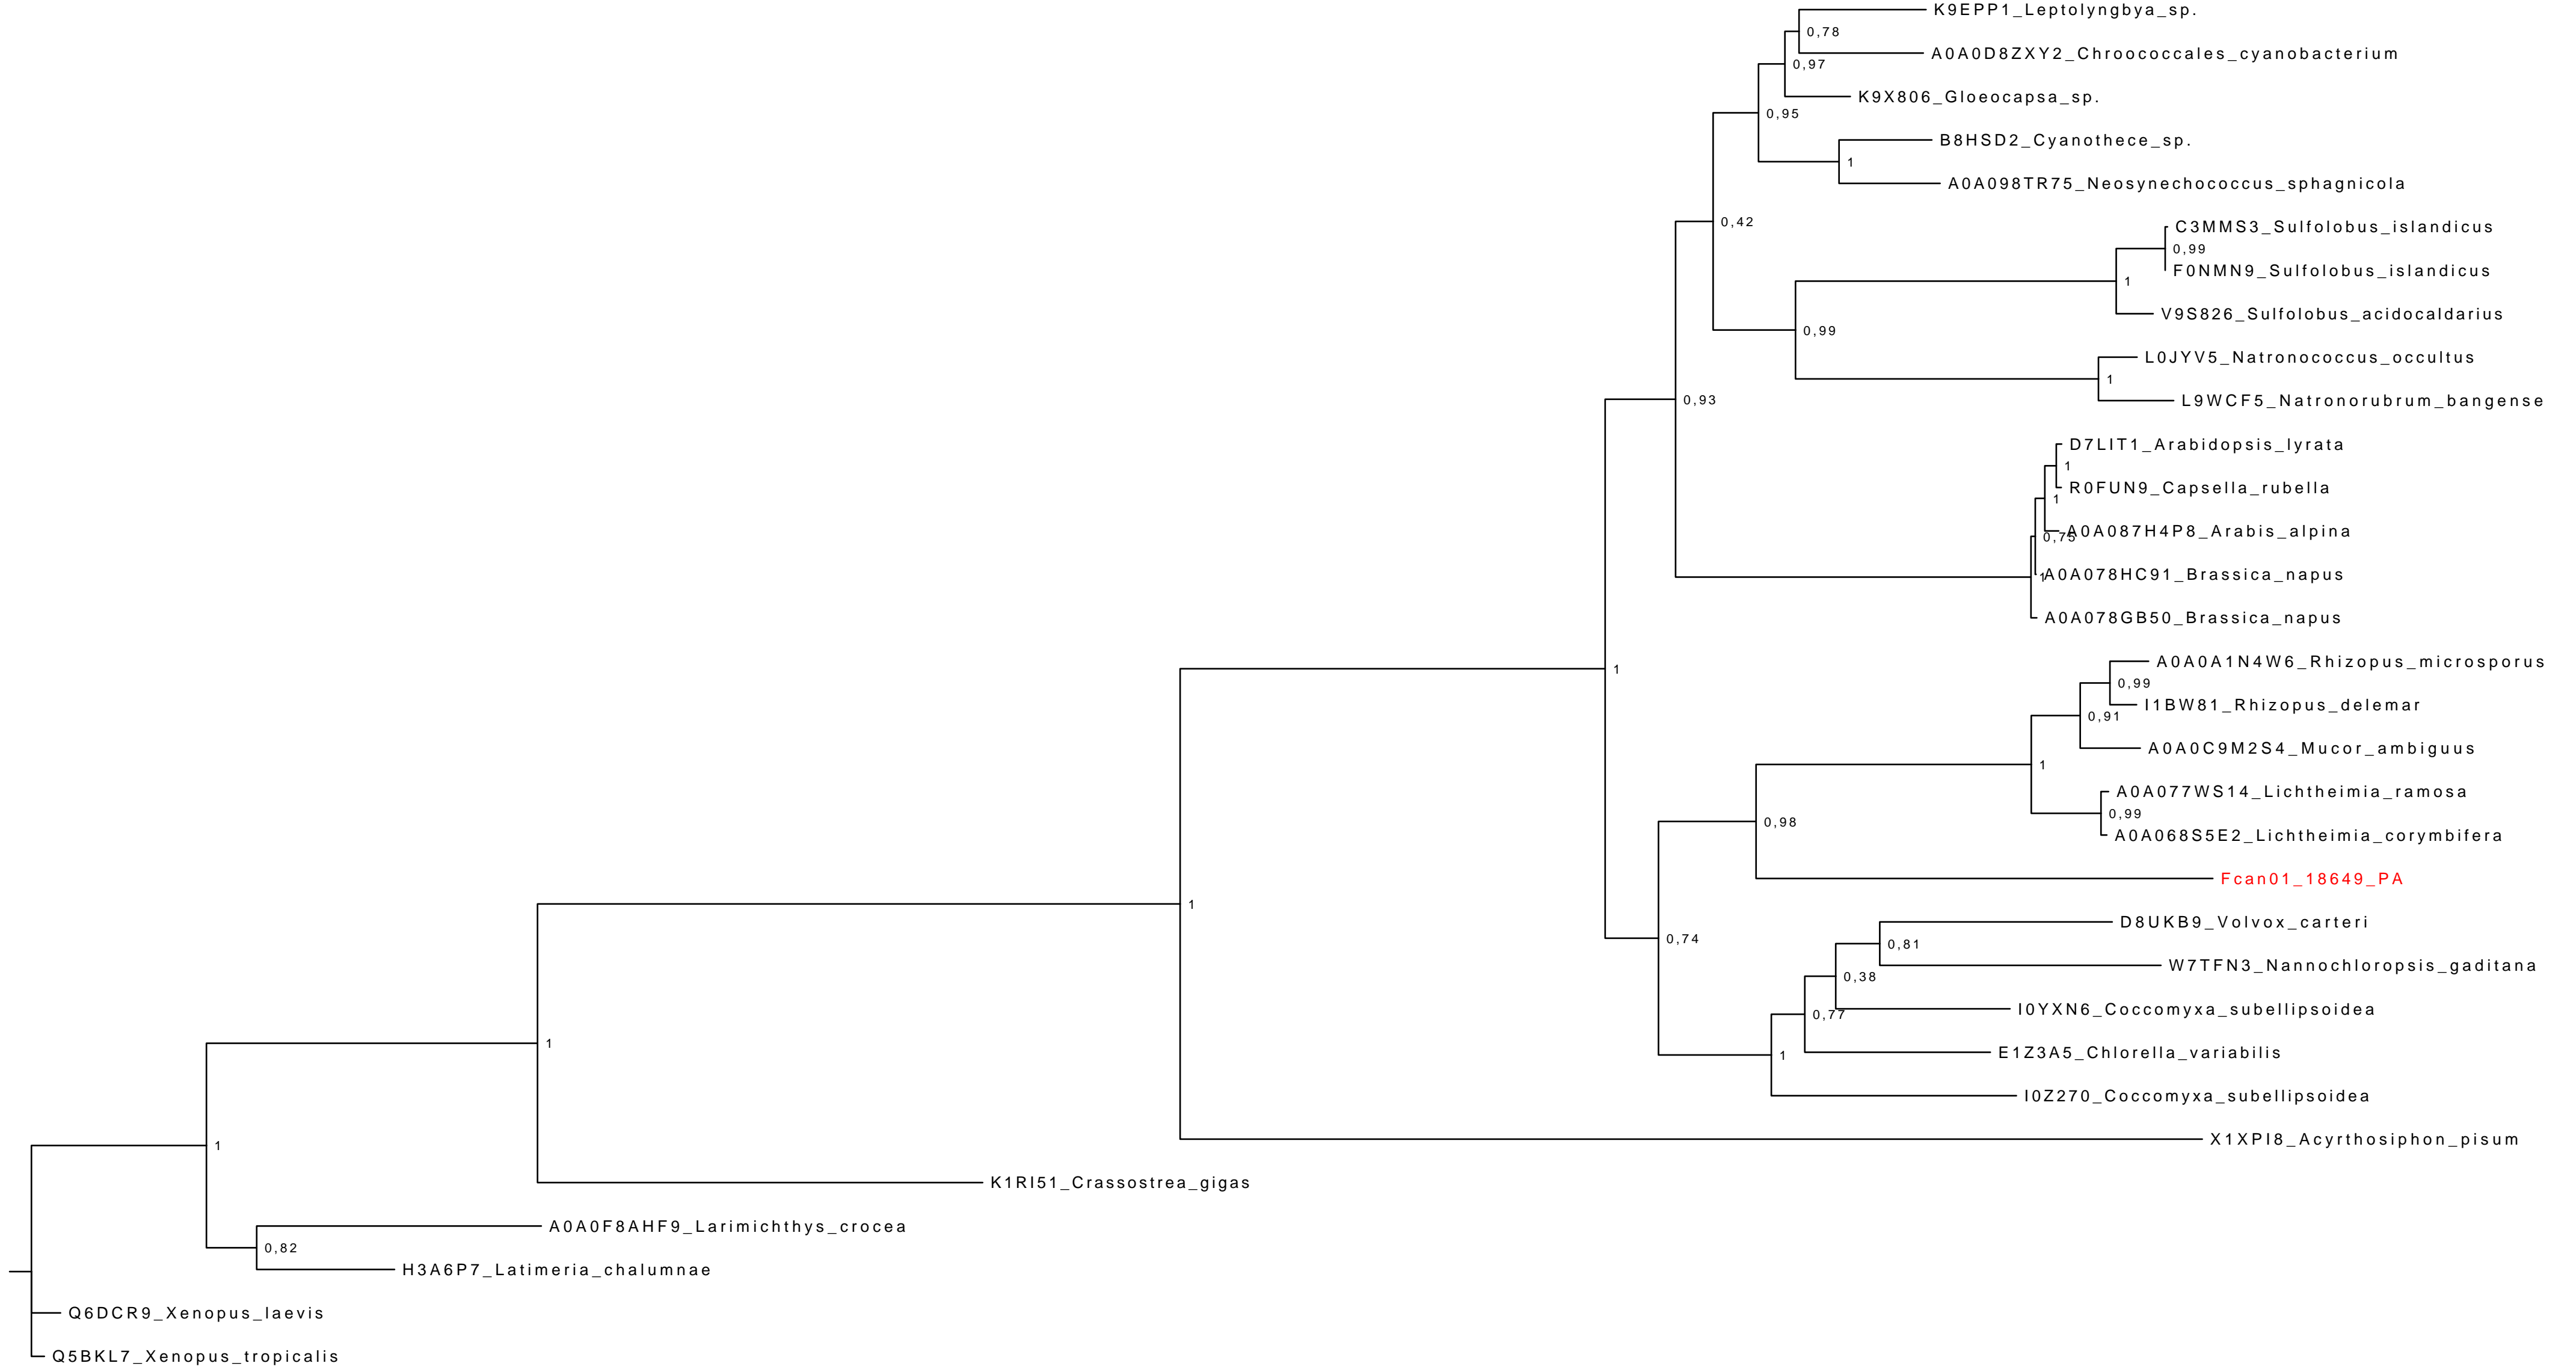

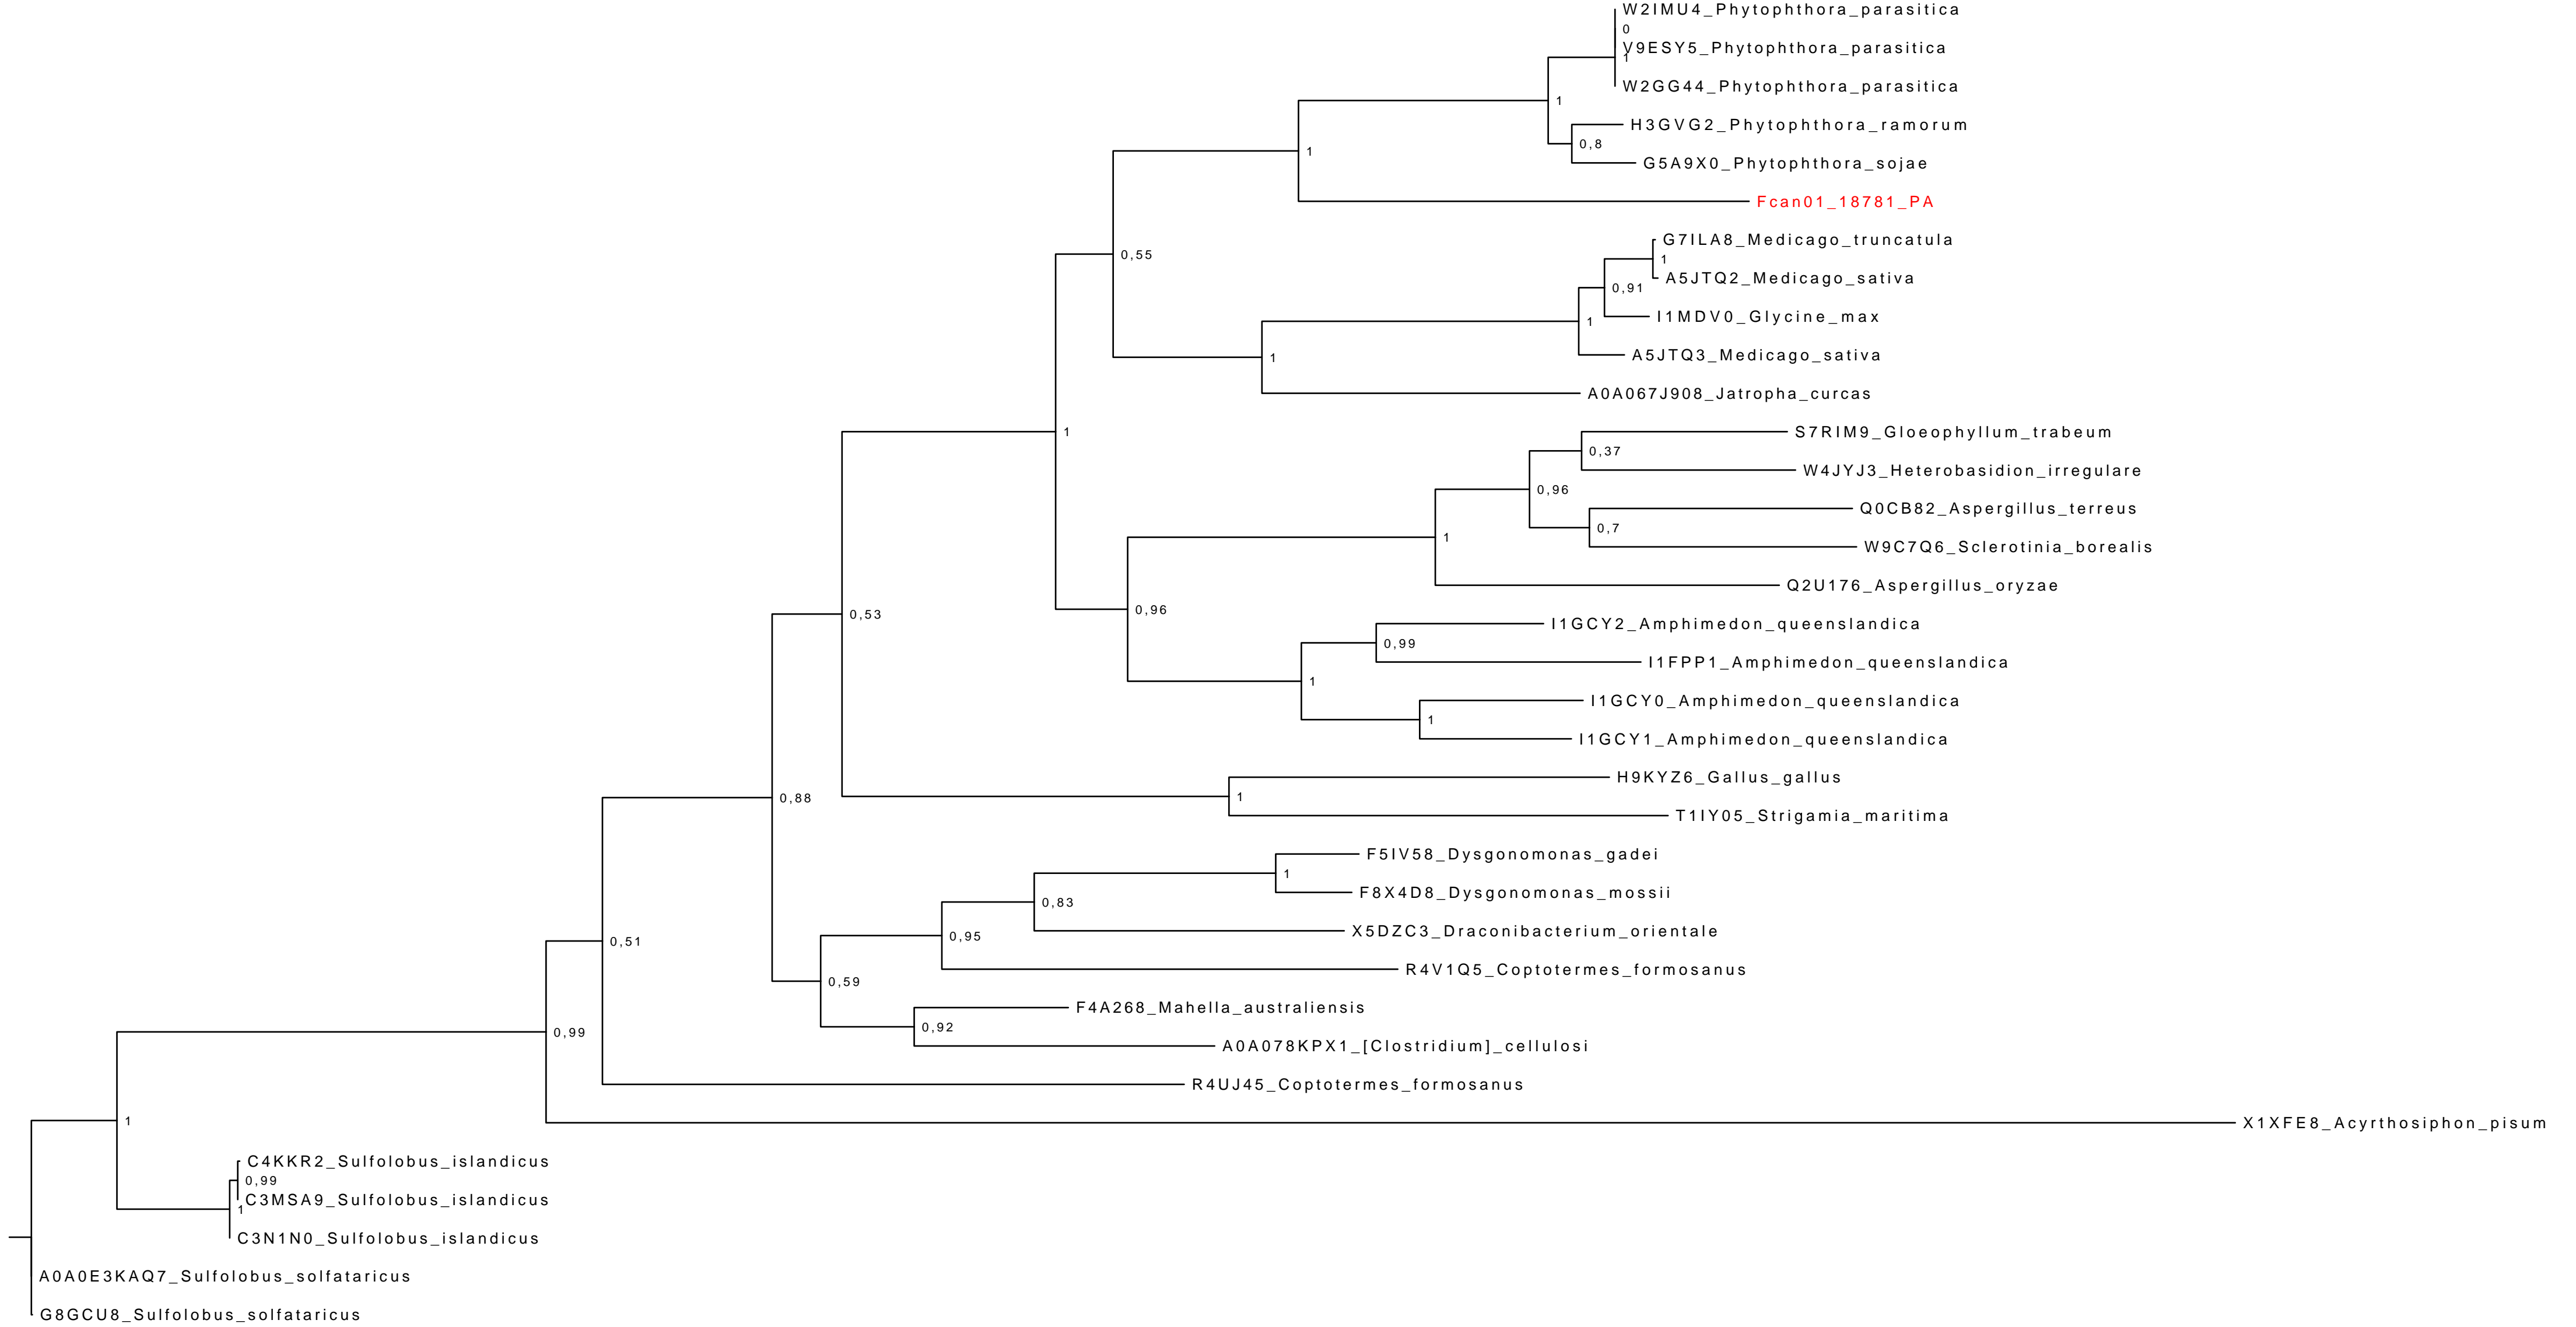

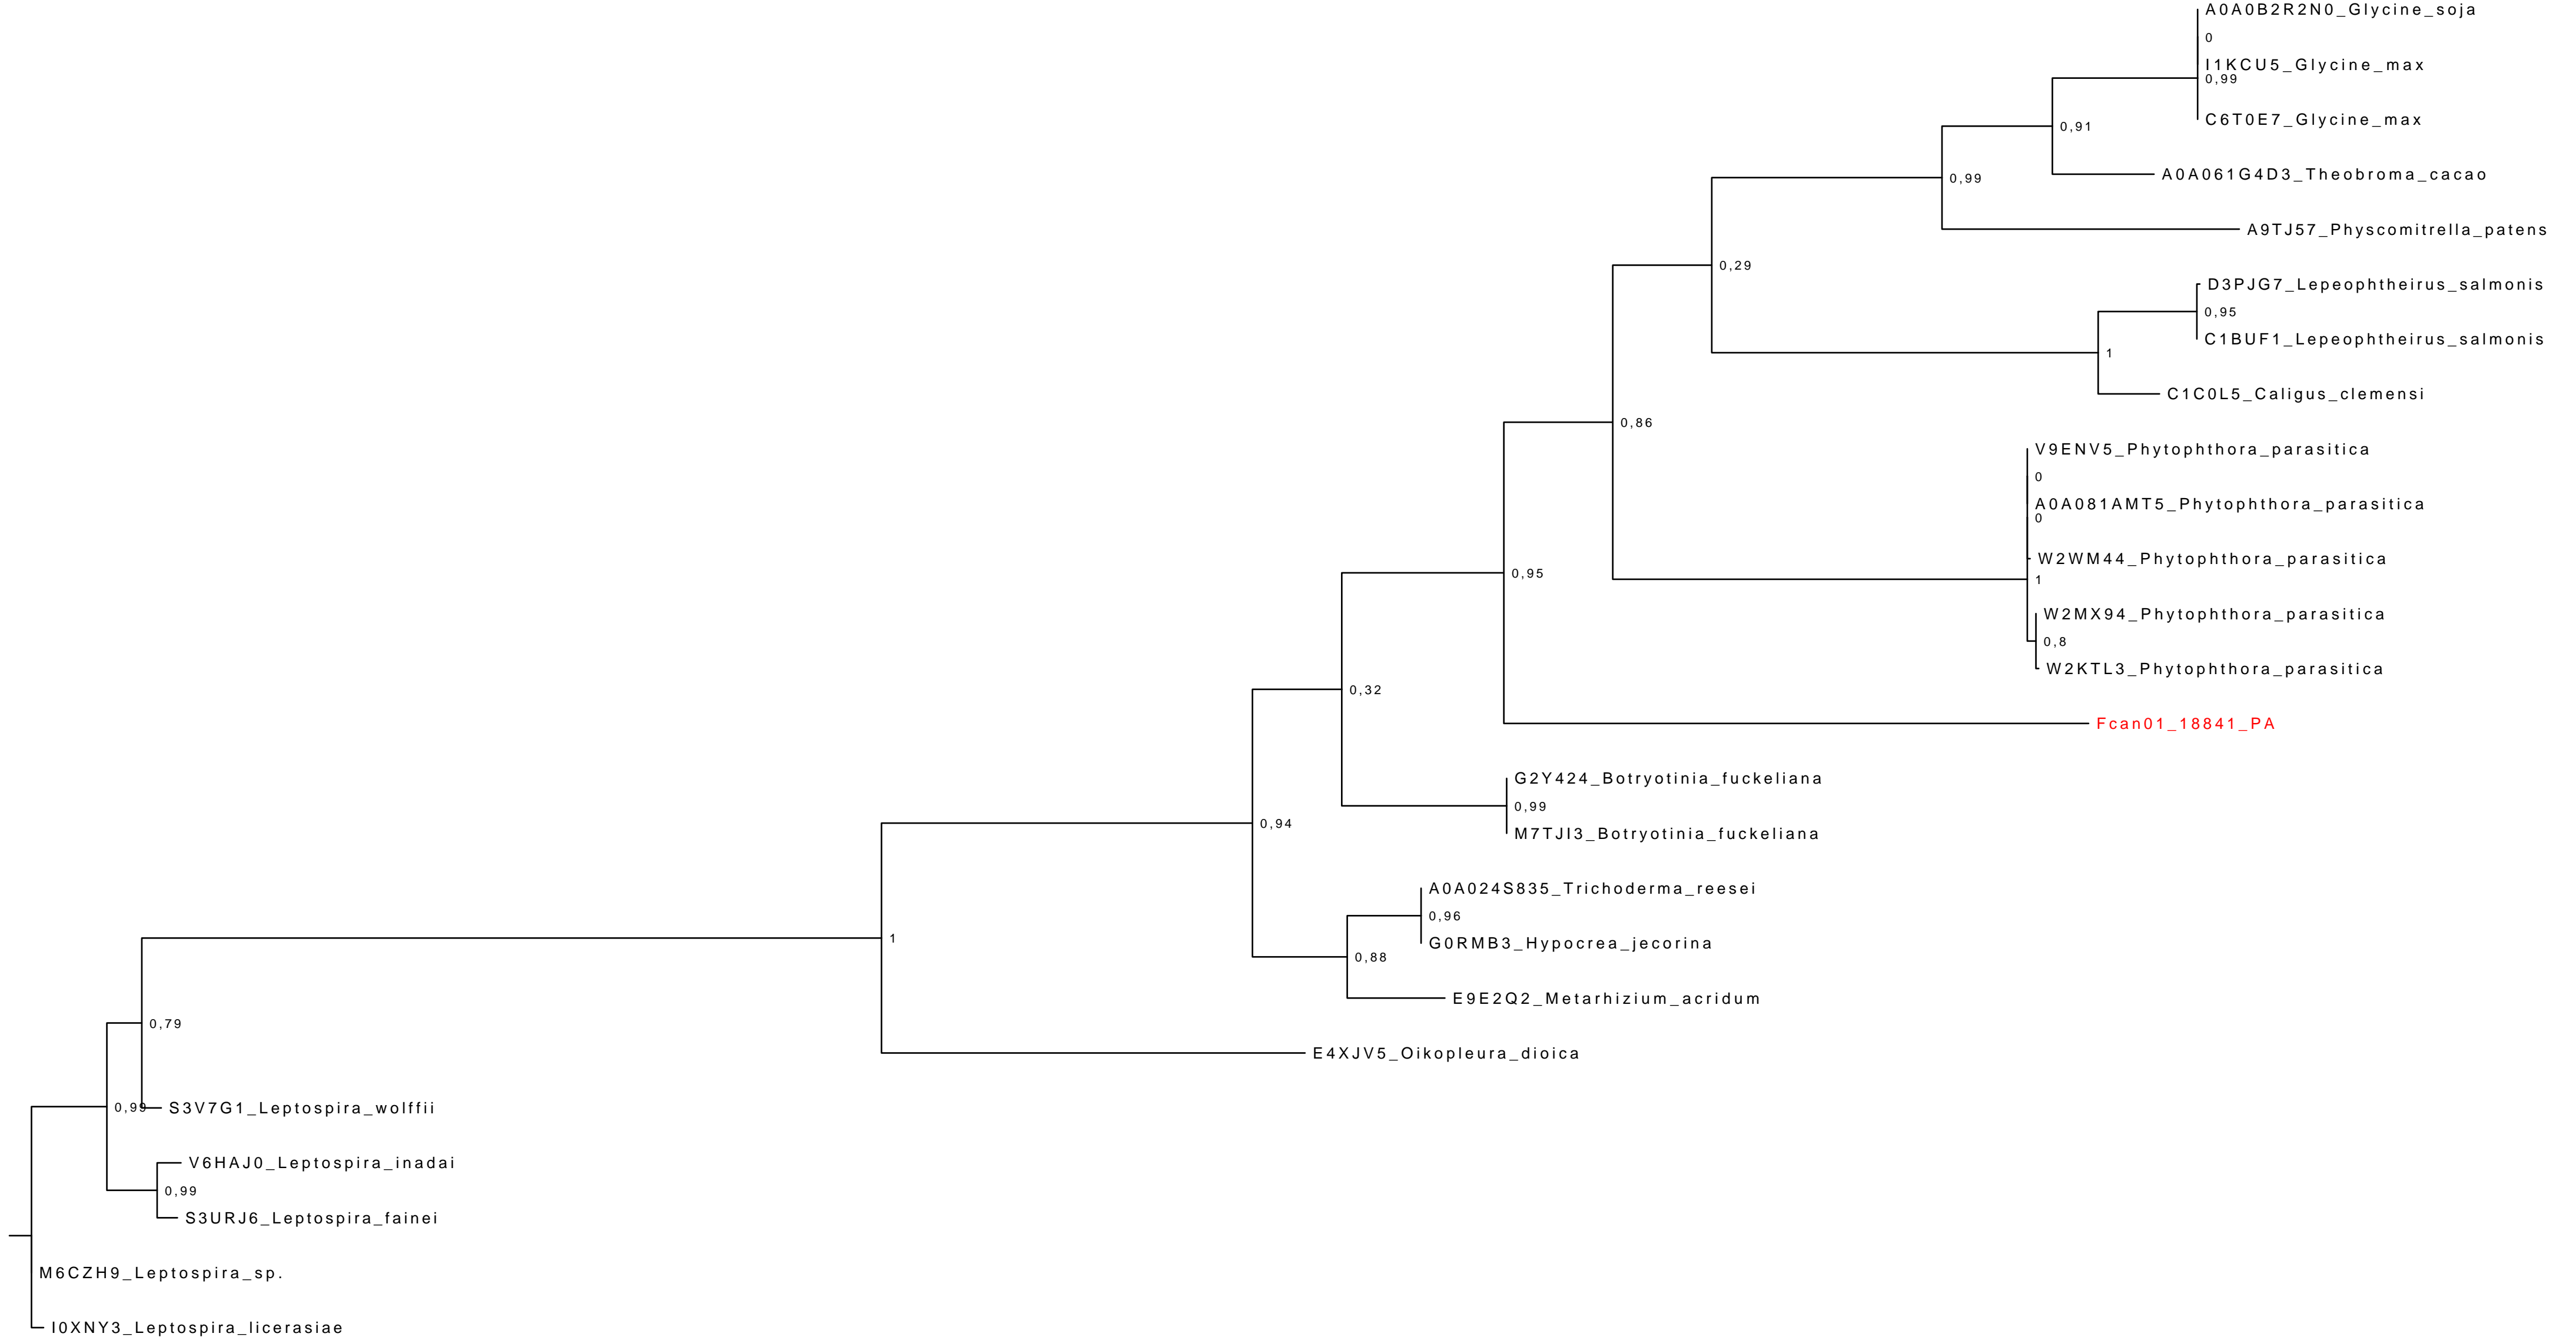

0.5

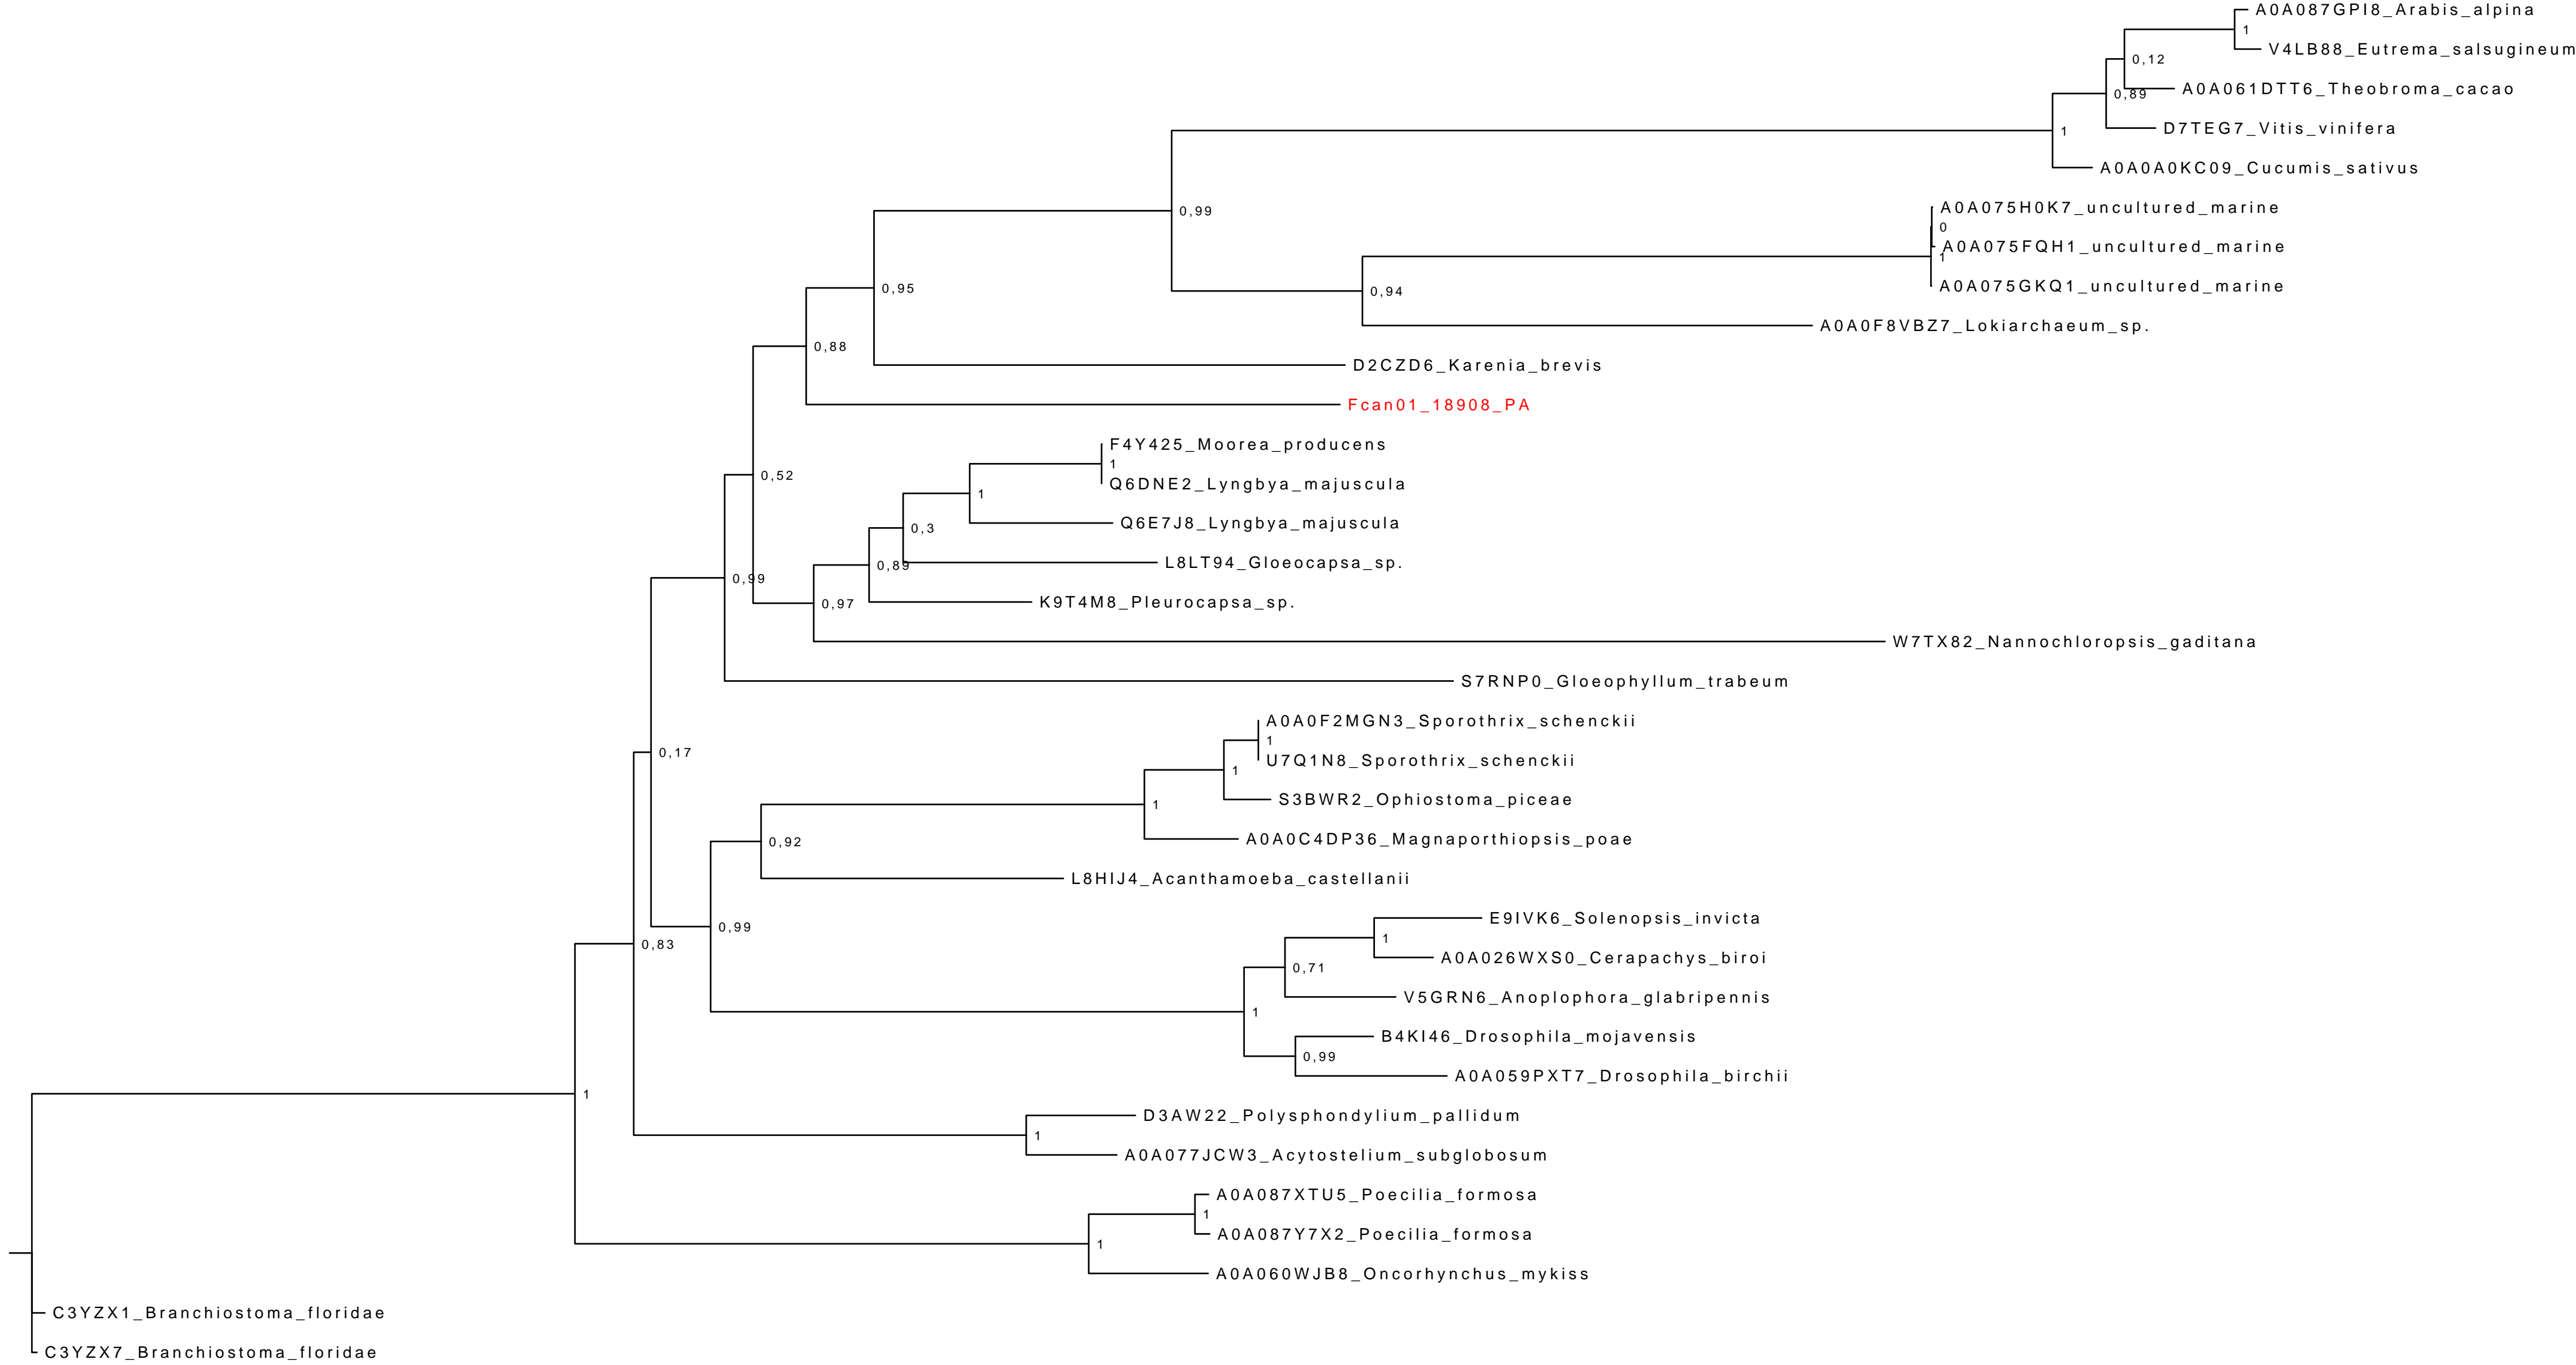

0.6

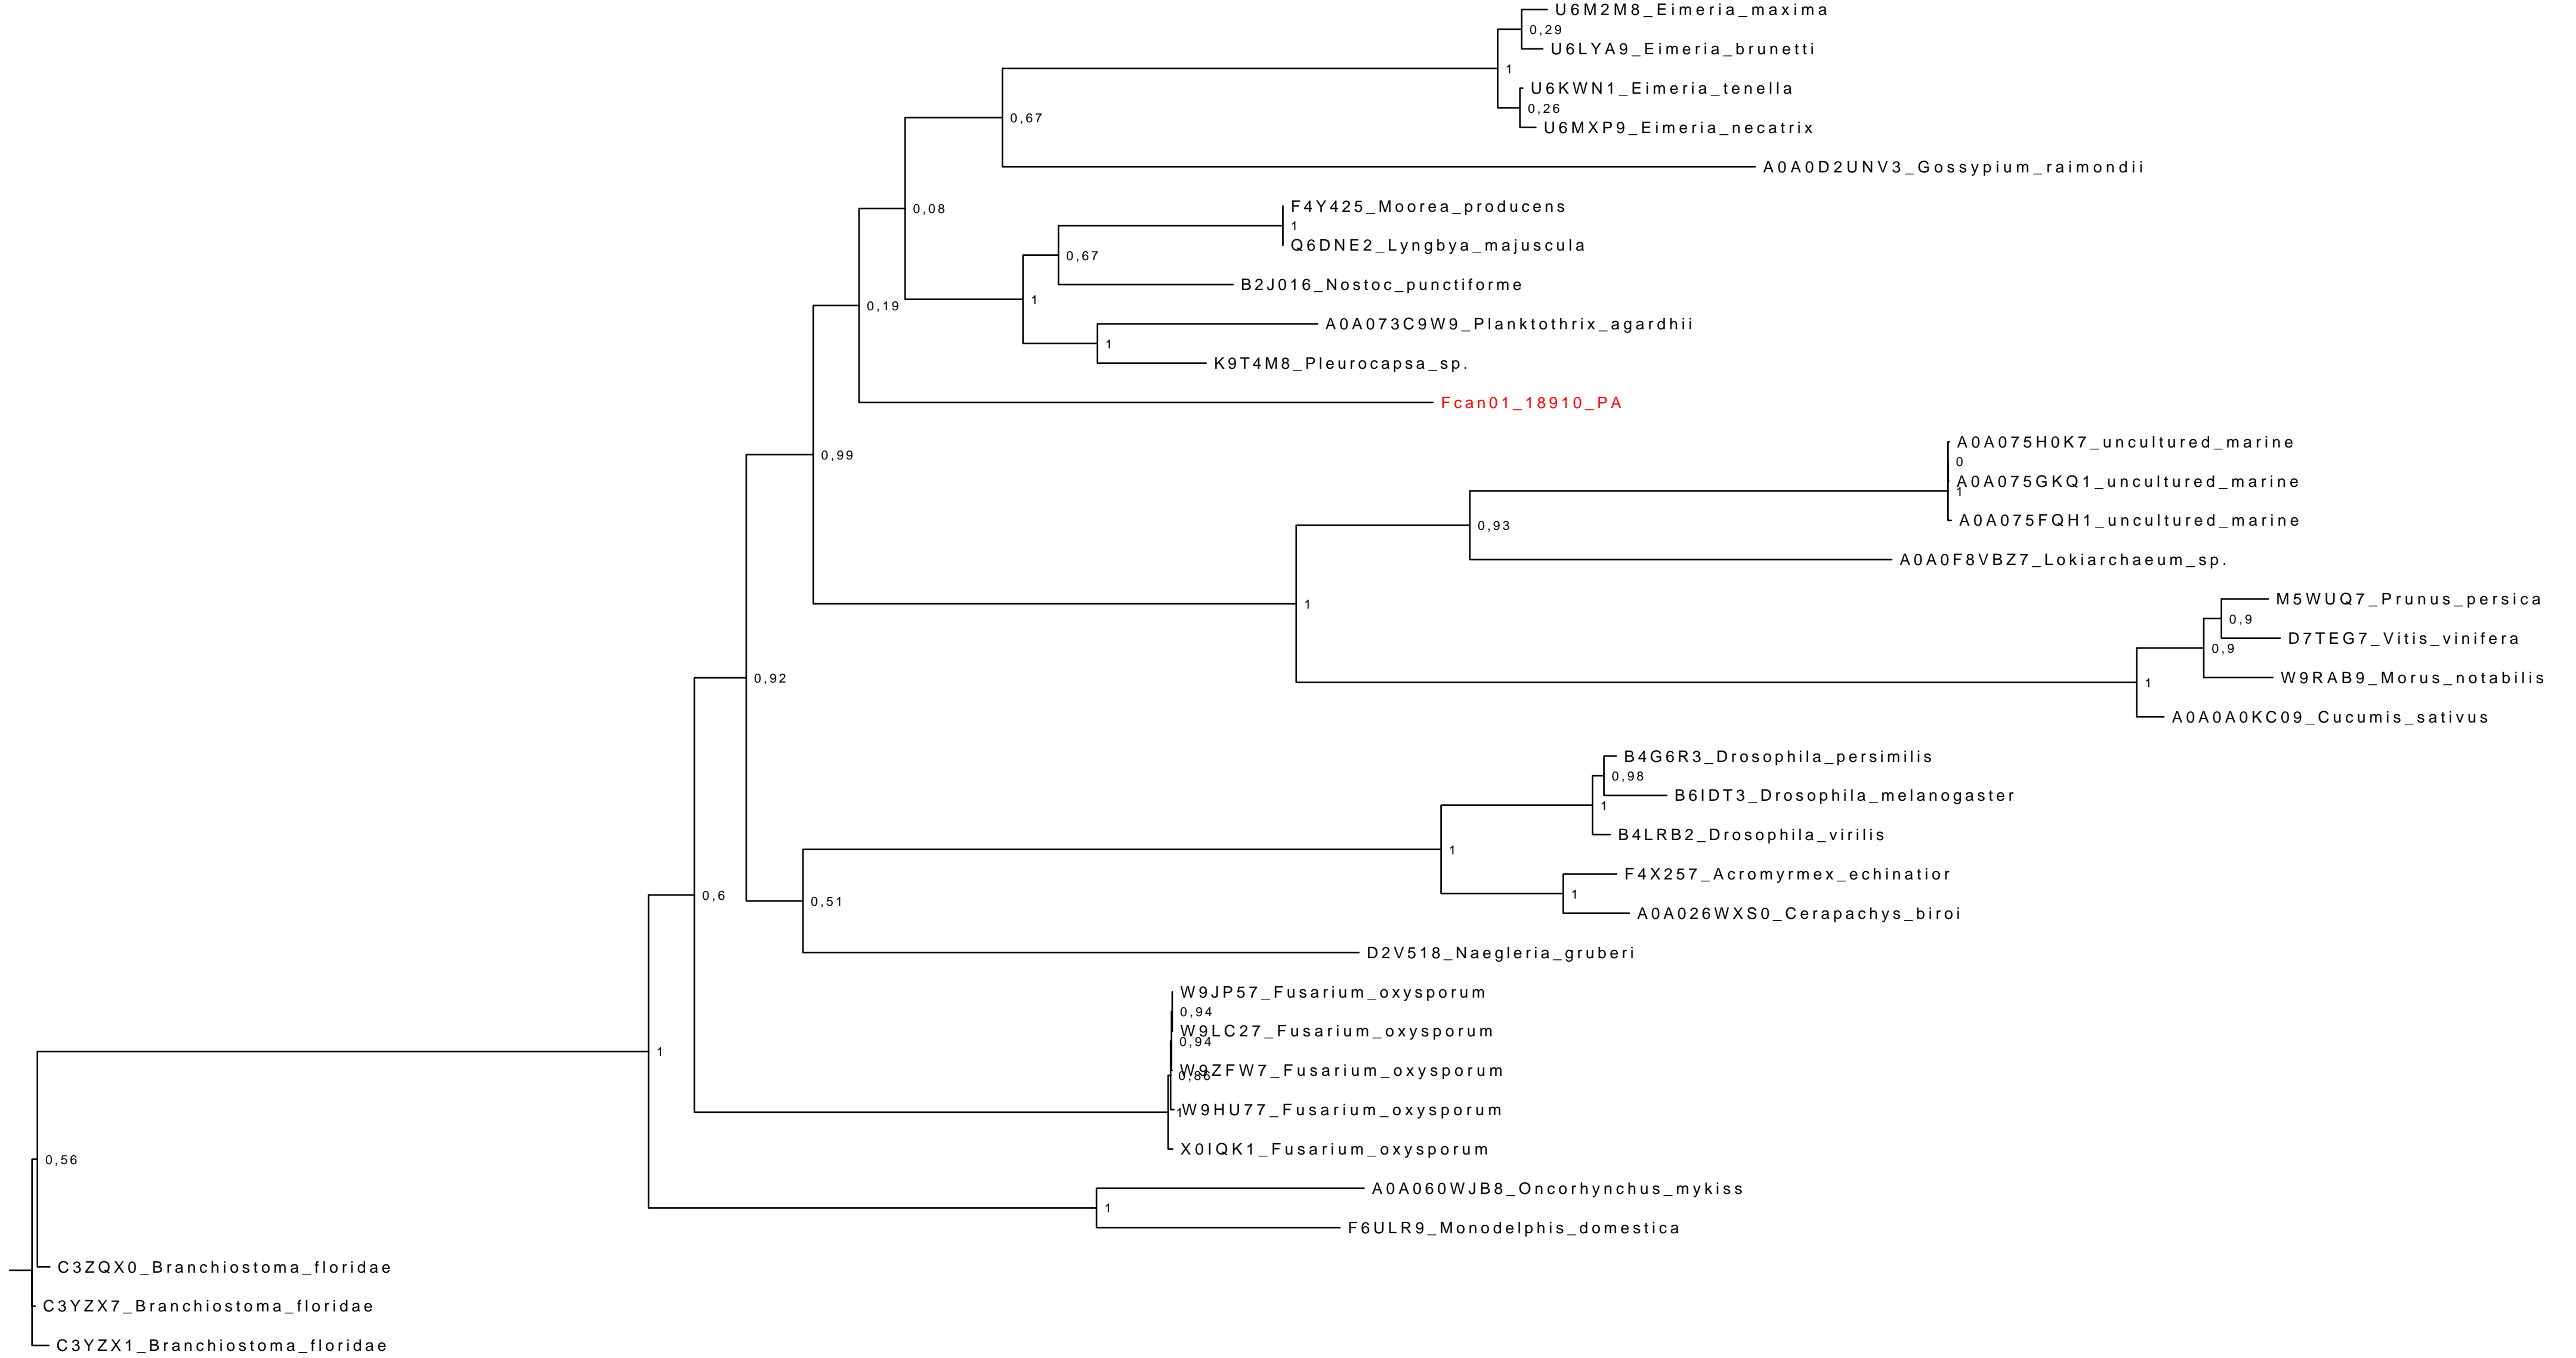

0.6

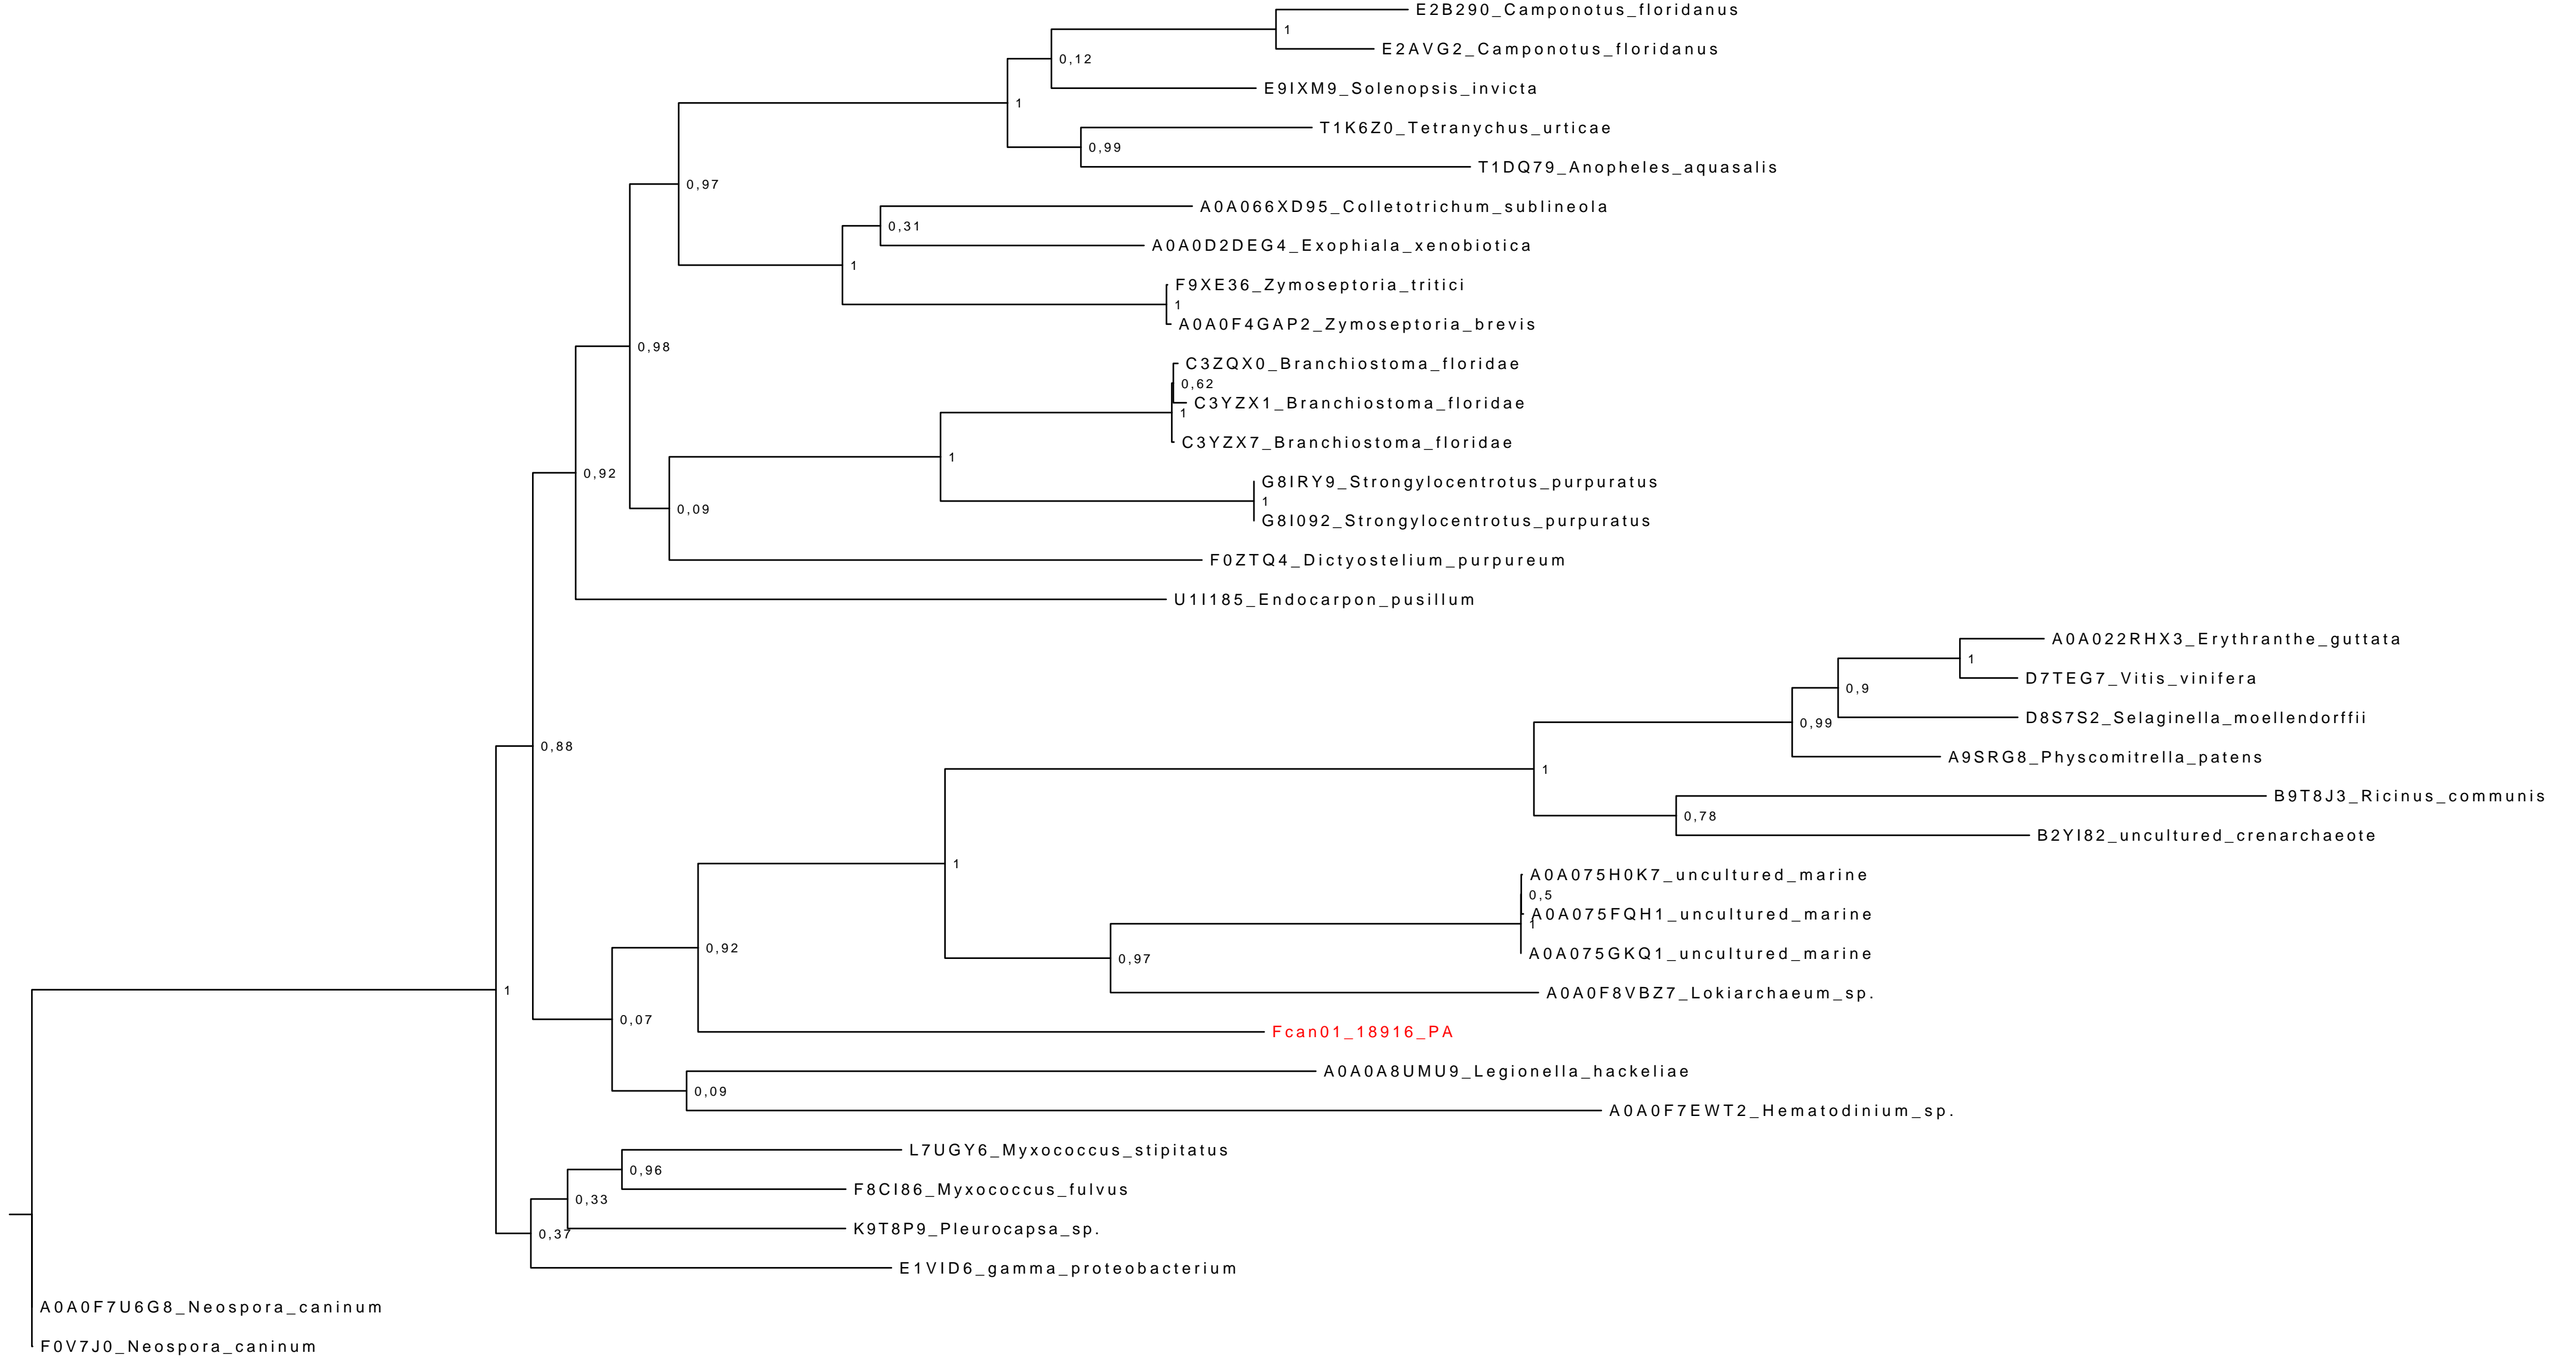

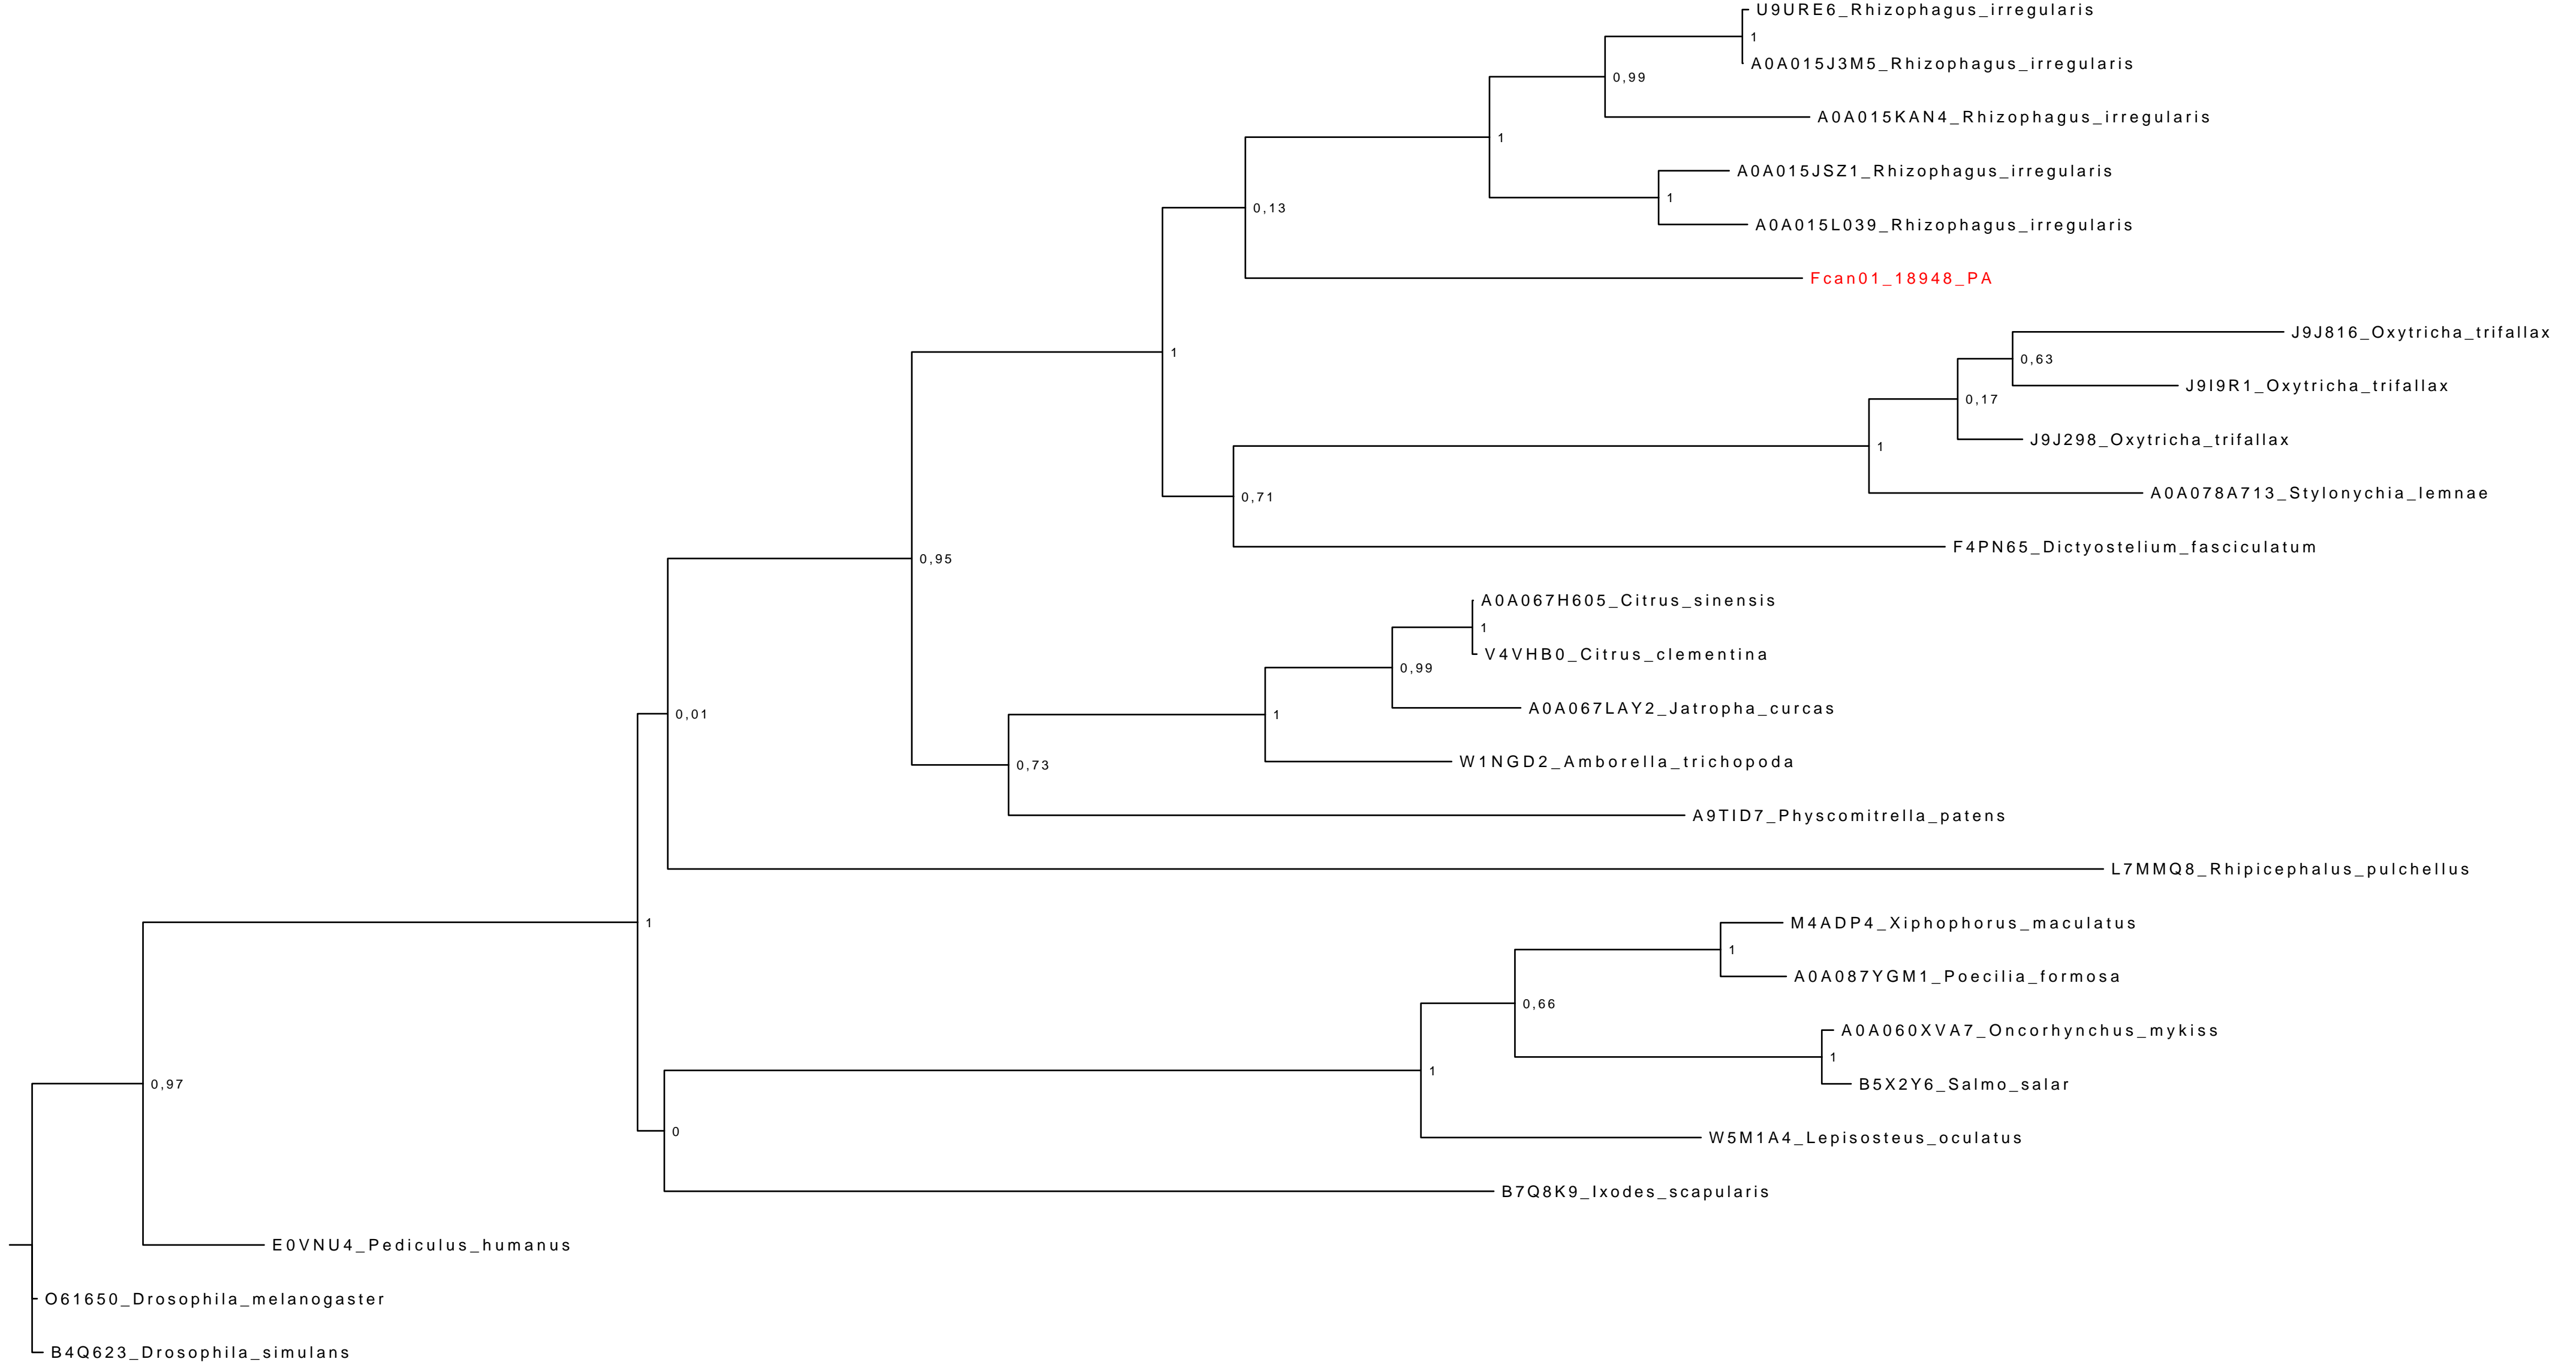

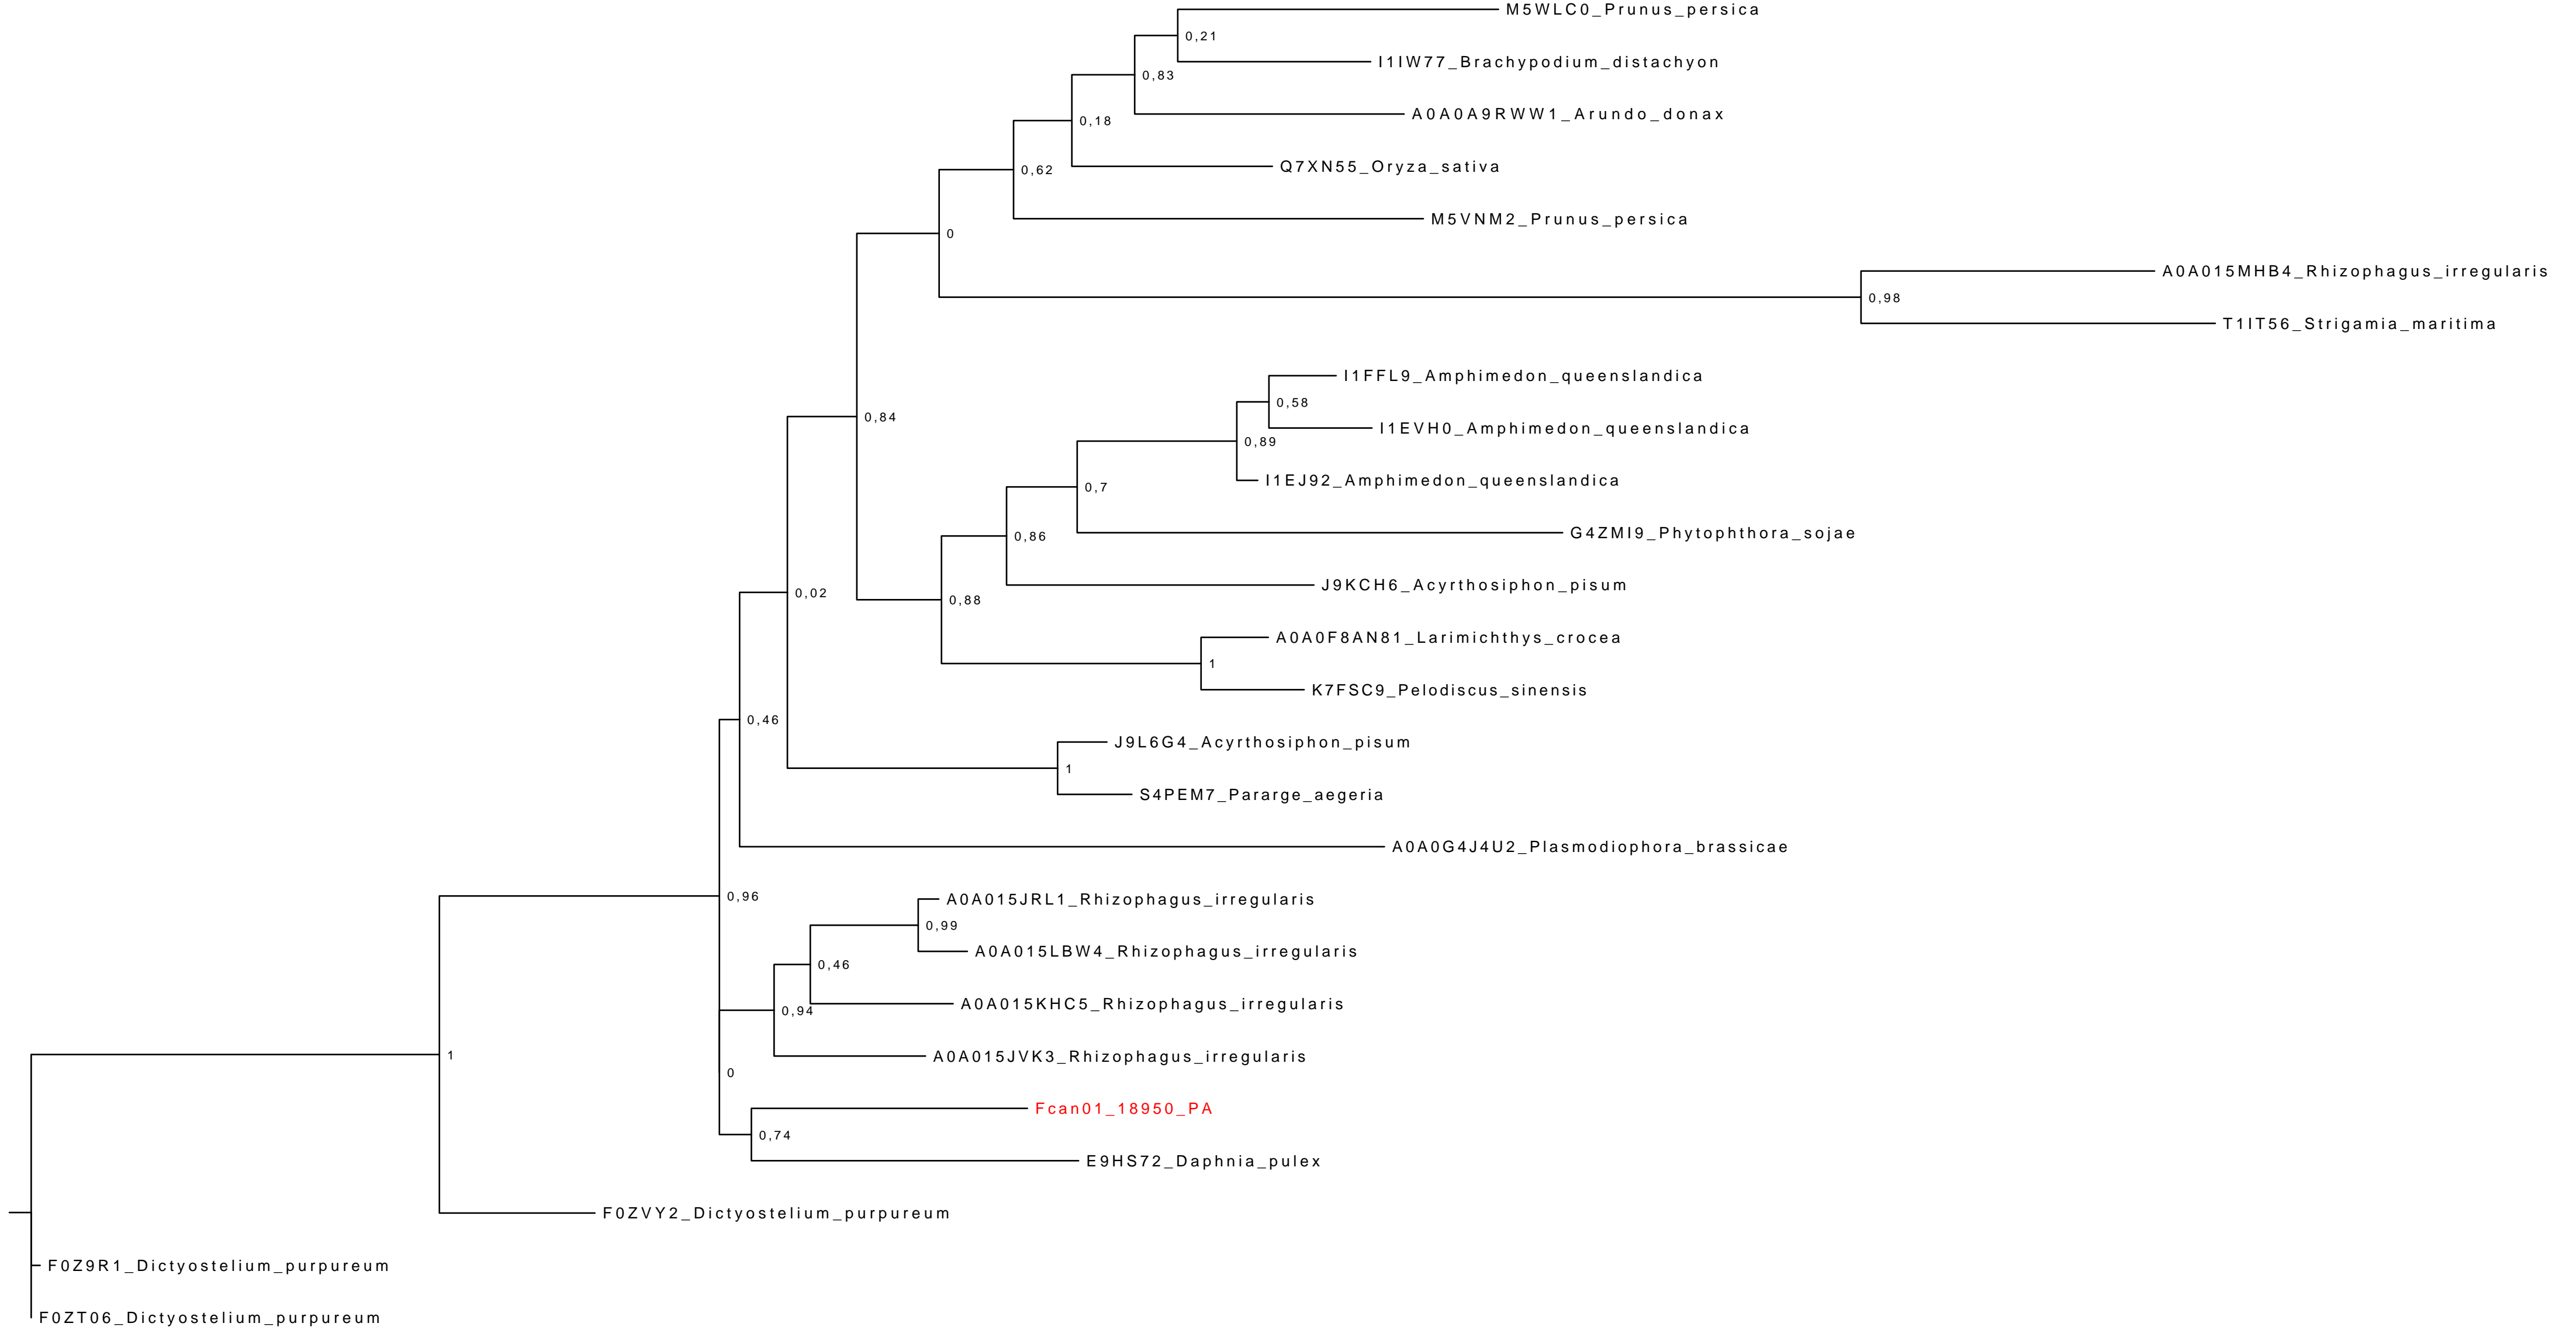



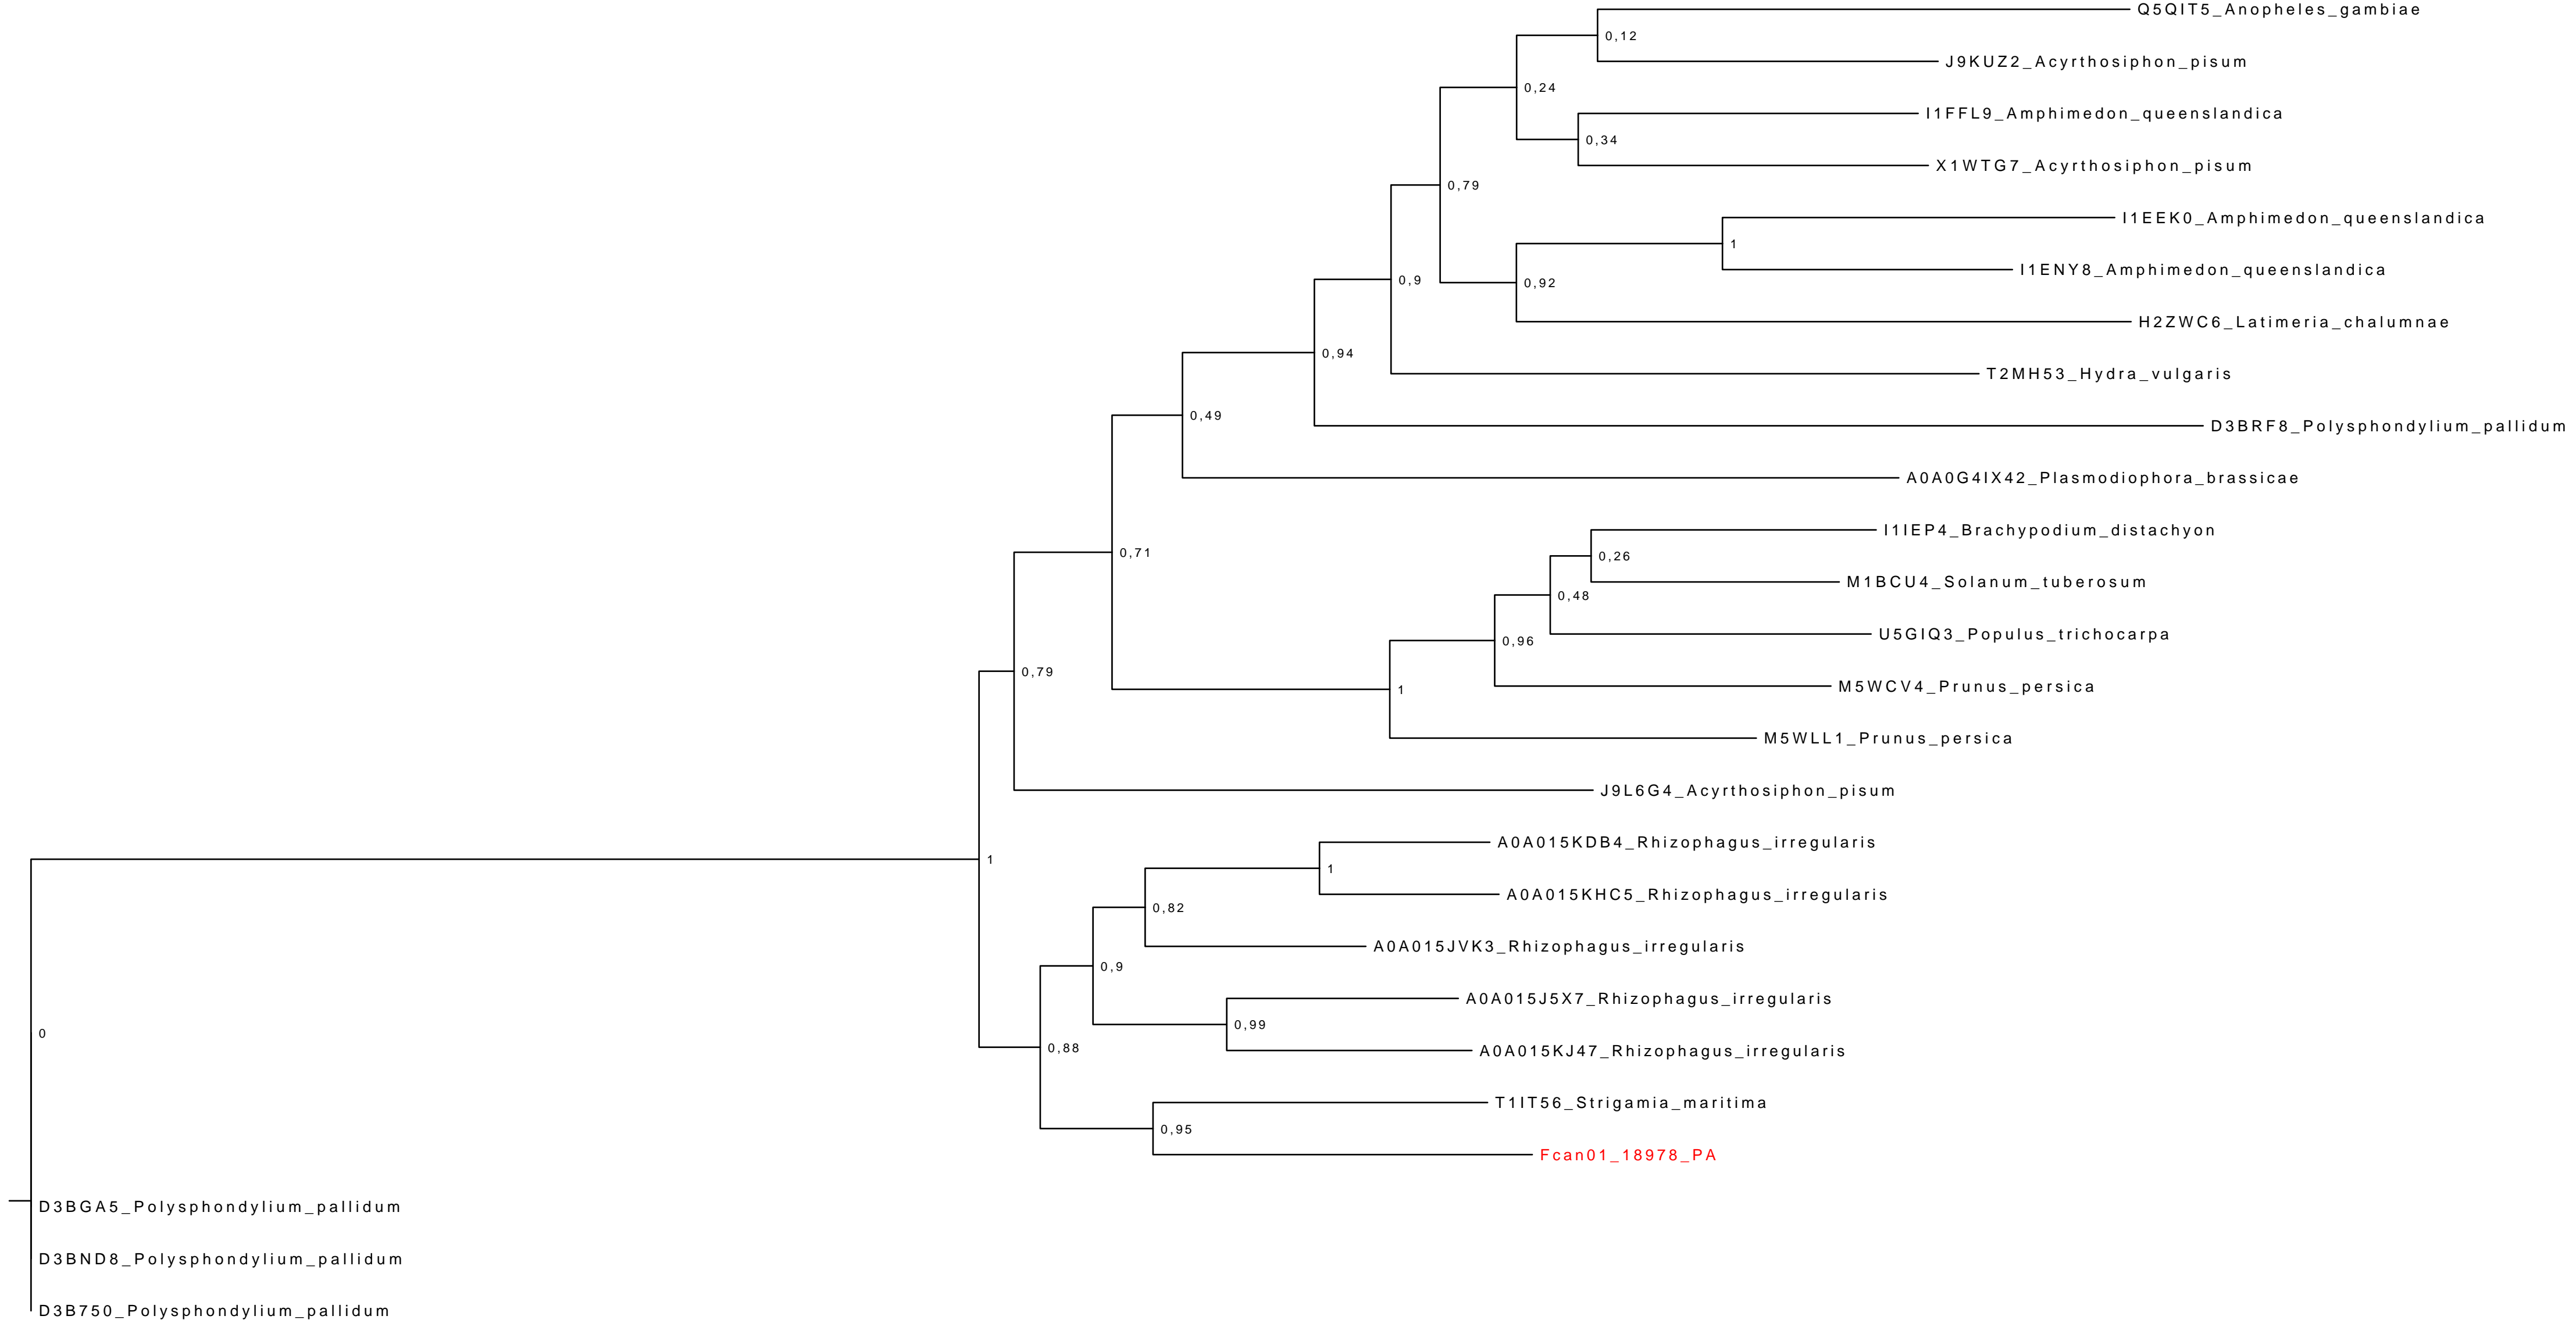

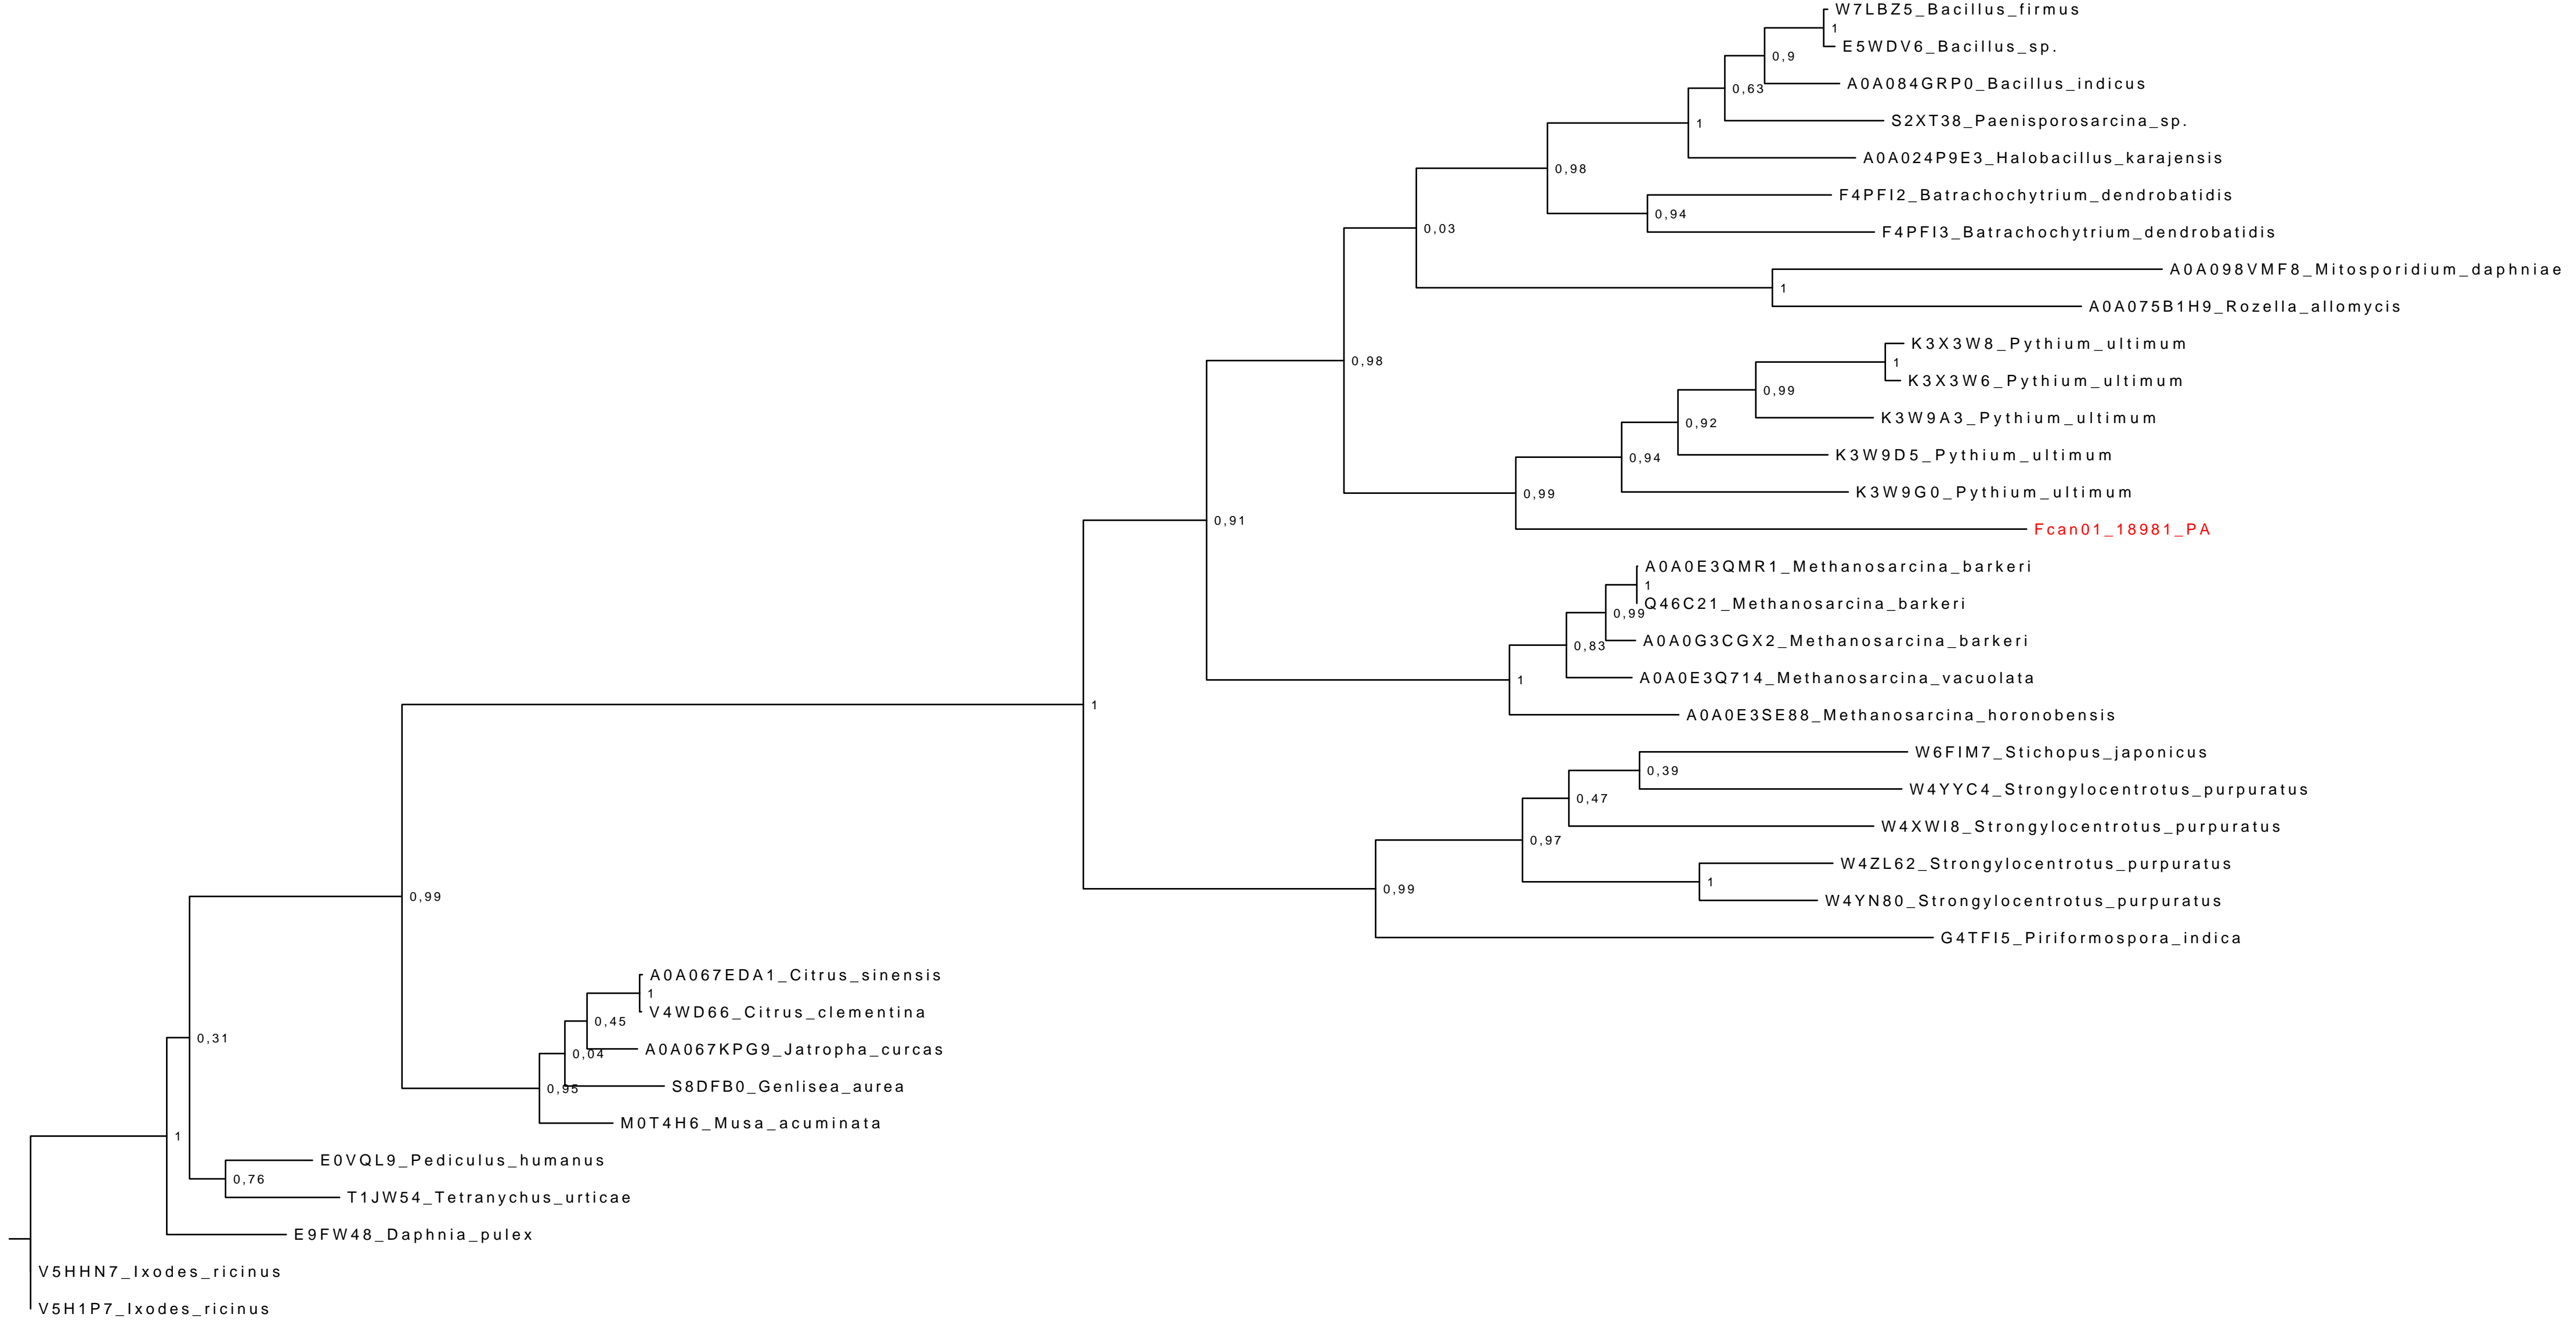

0.5

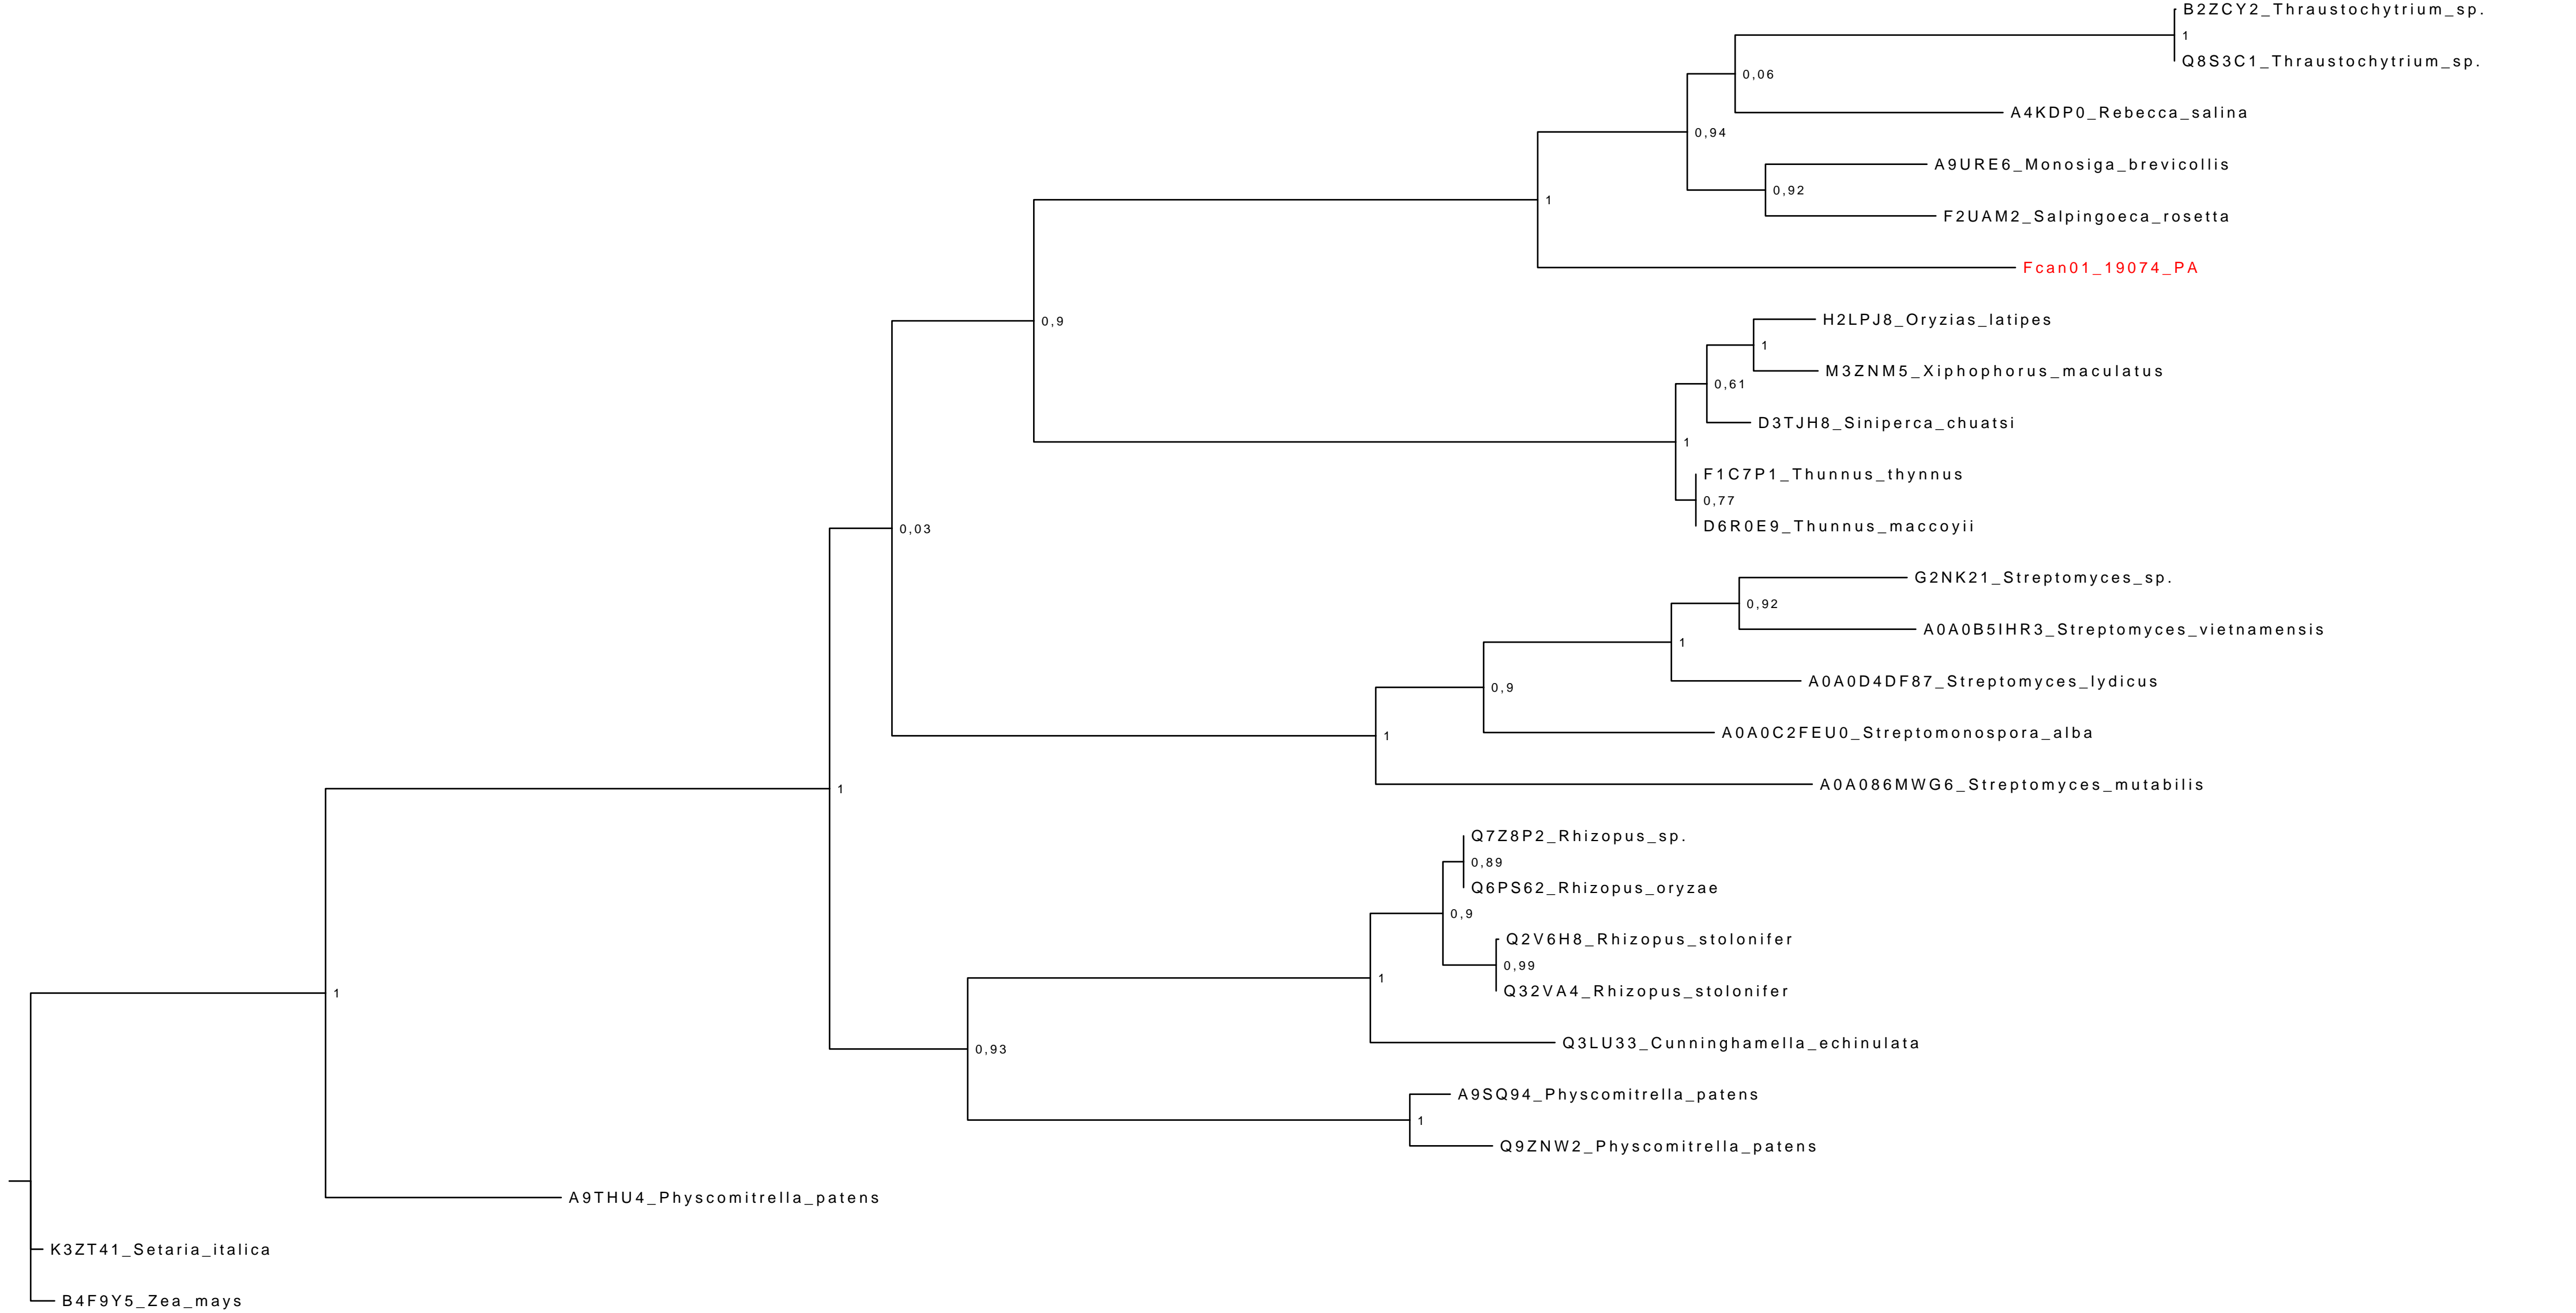

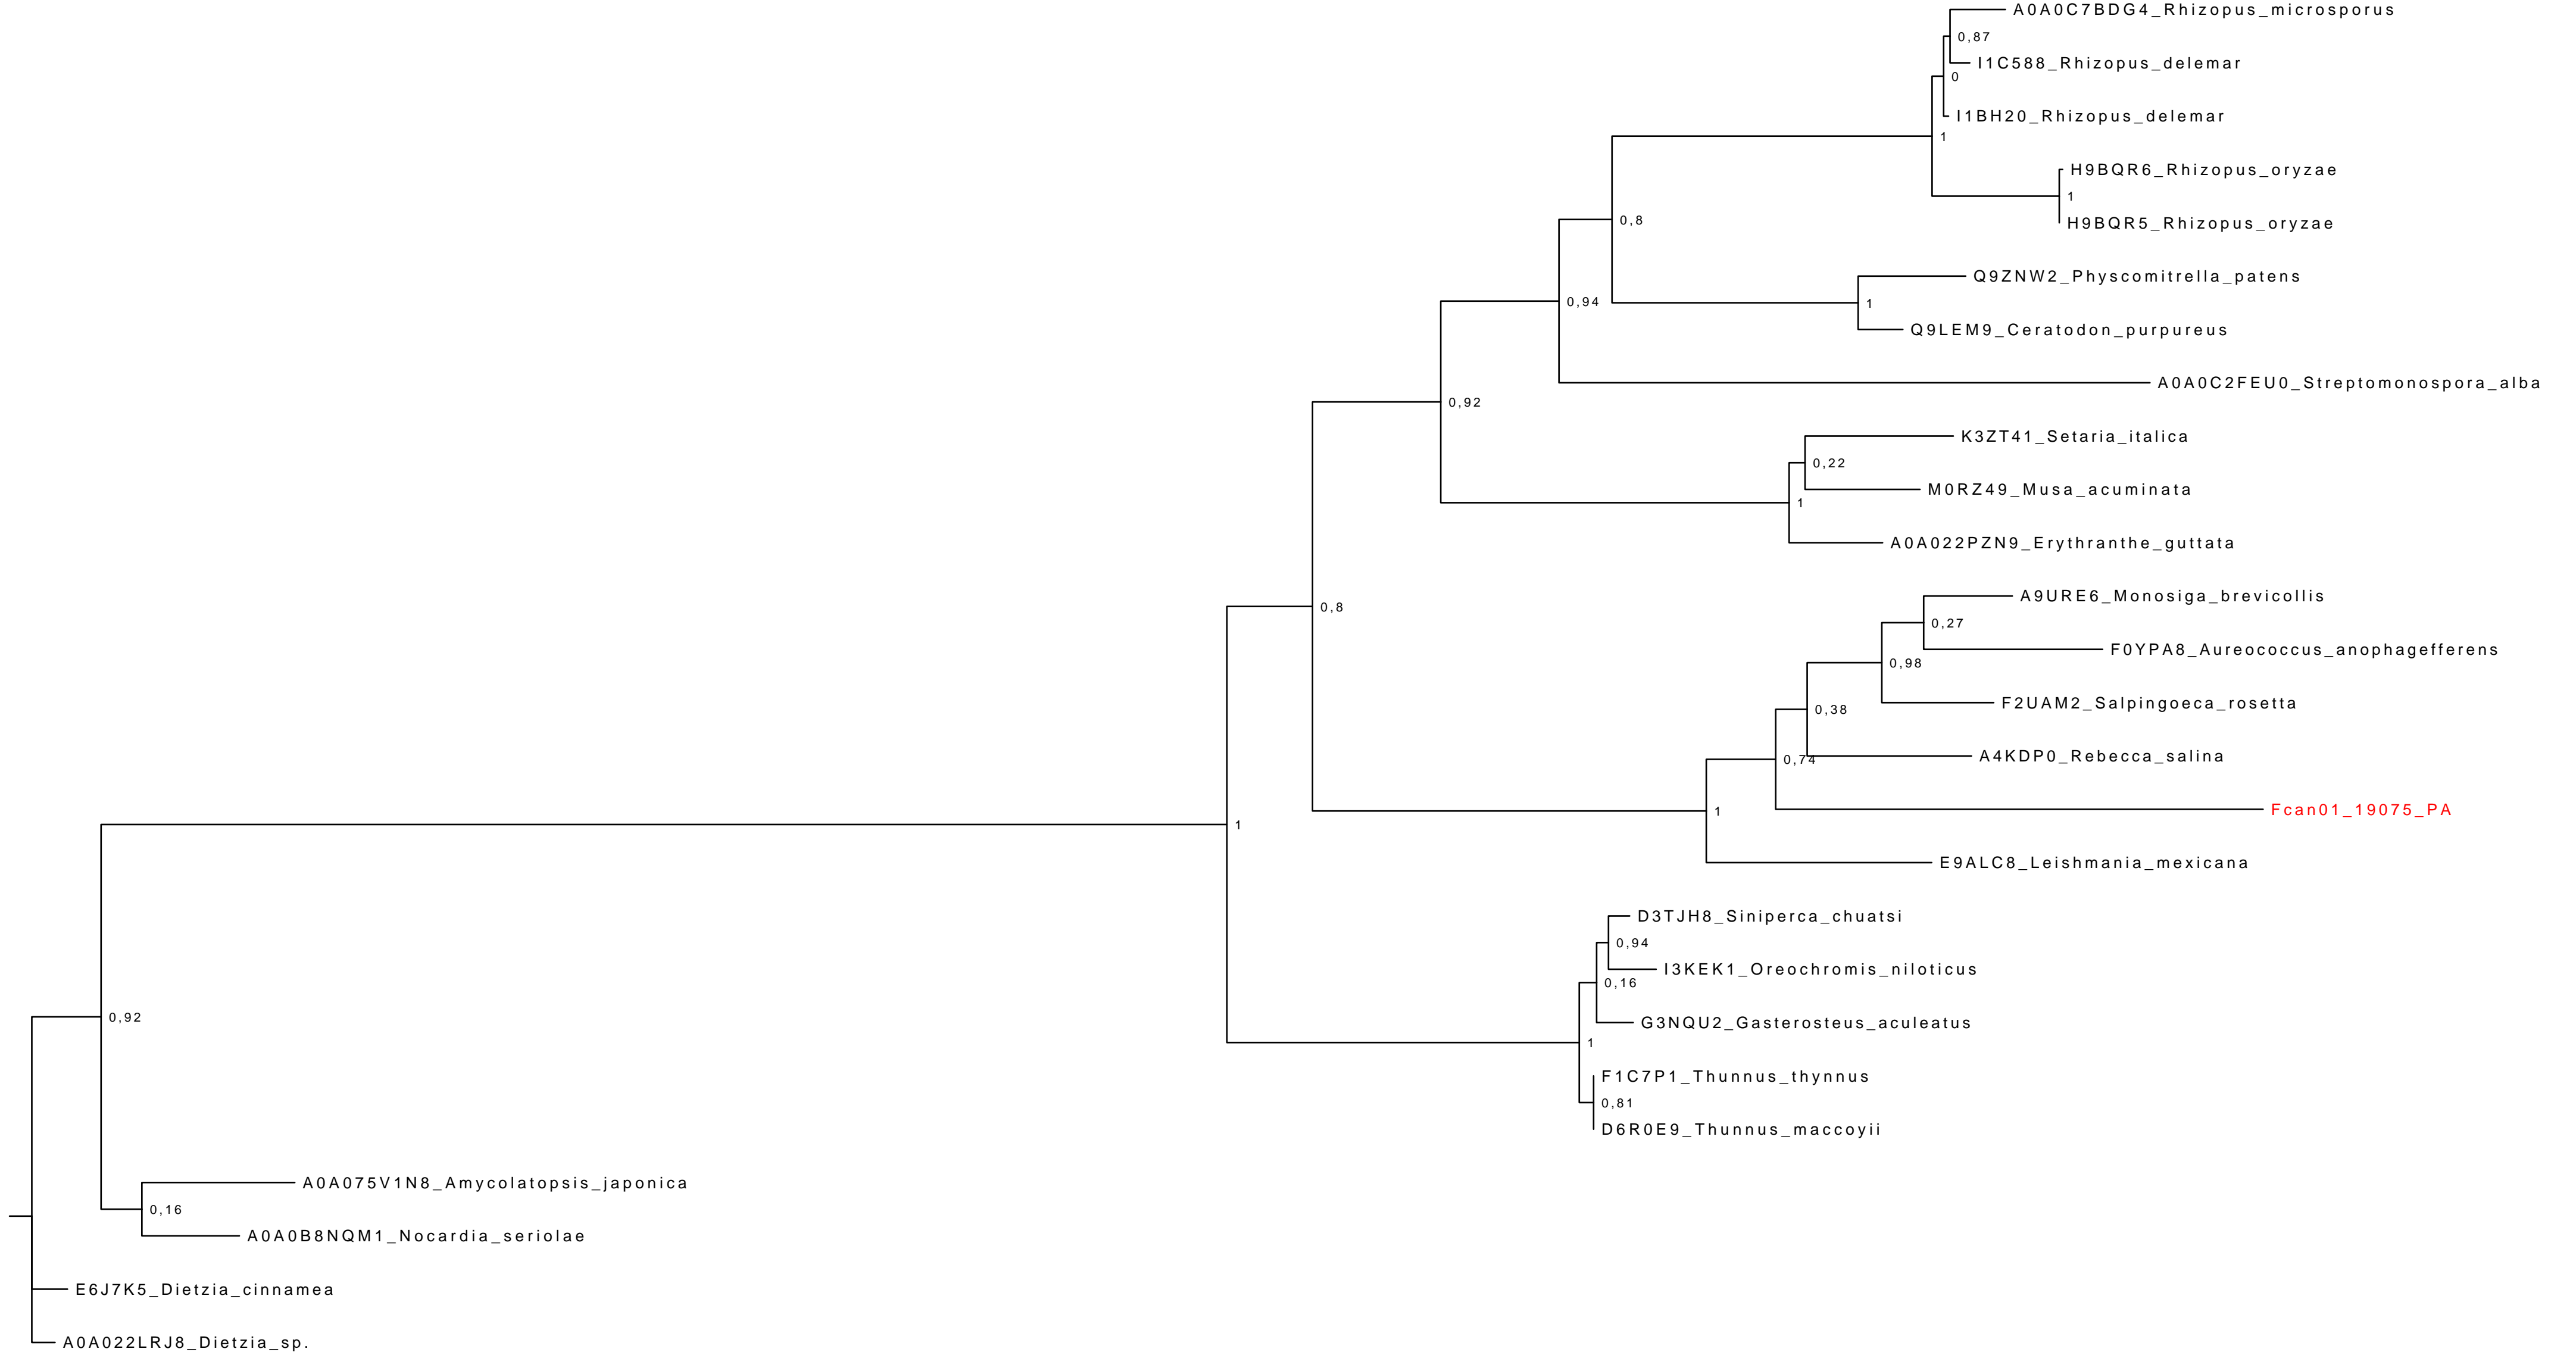

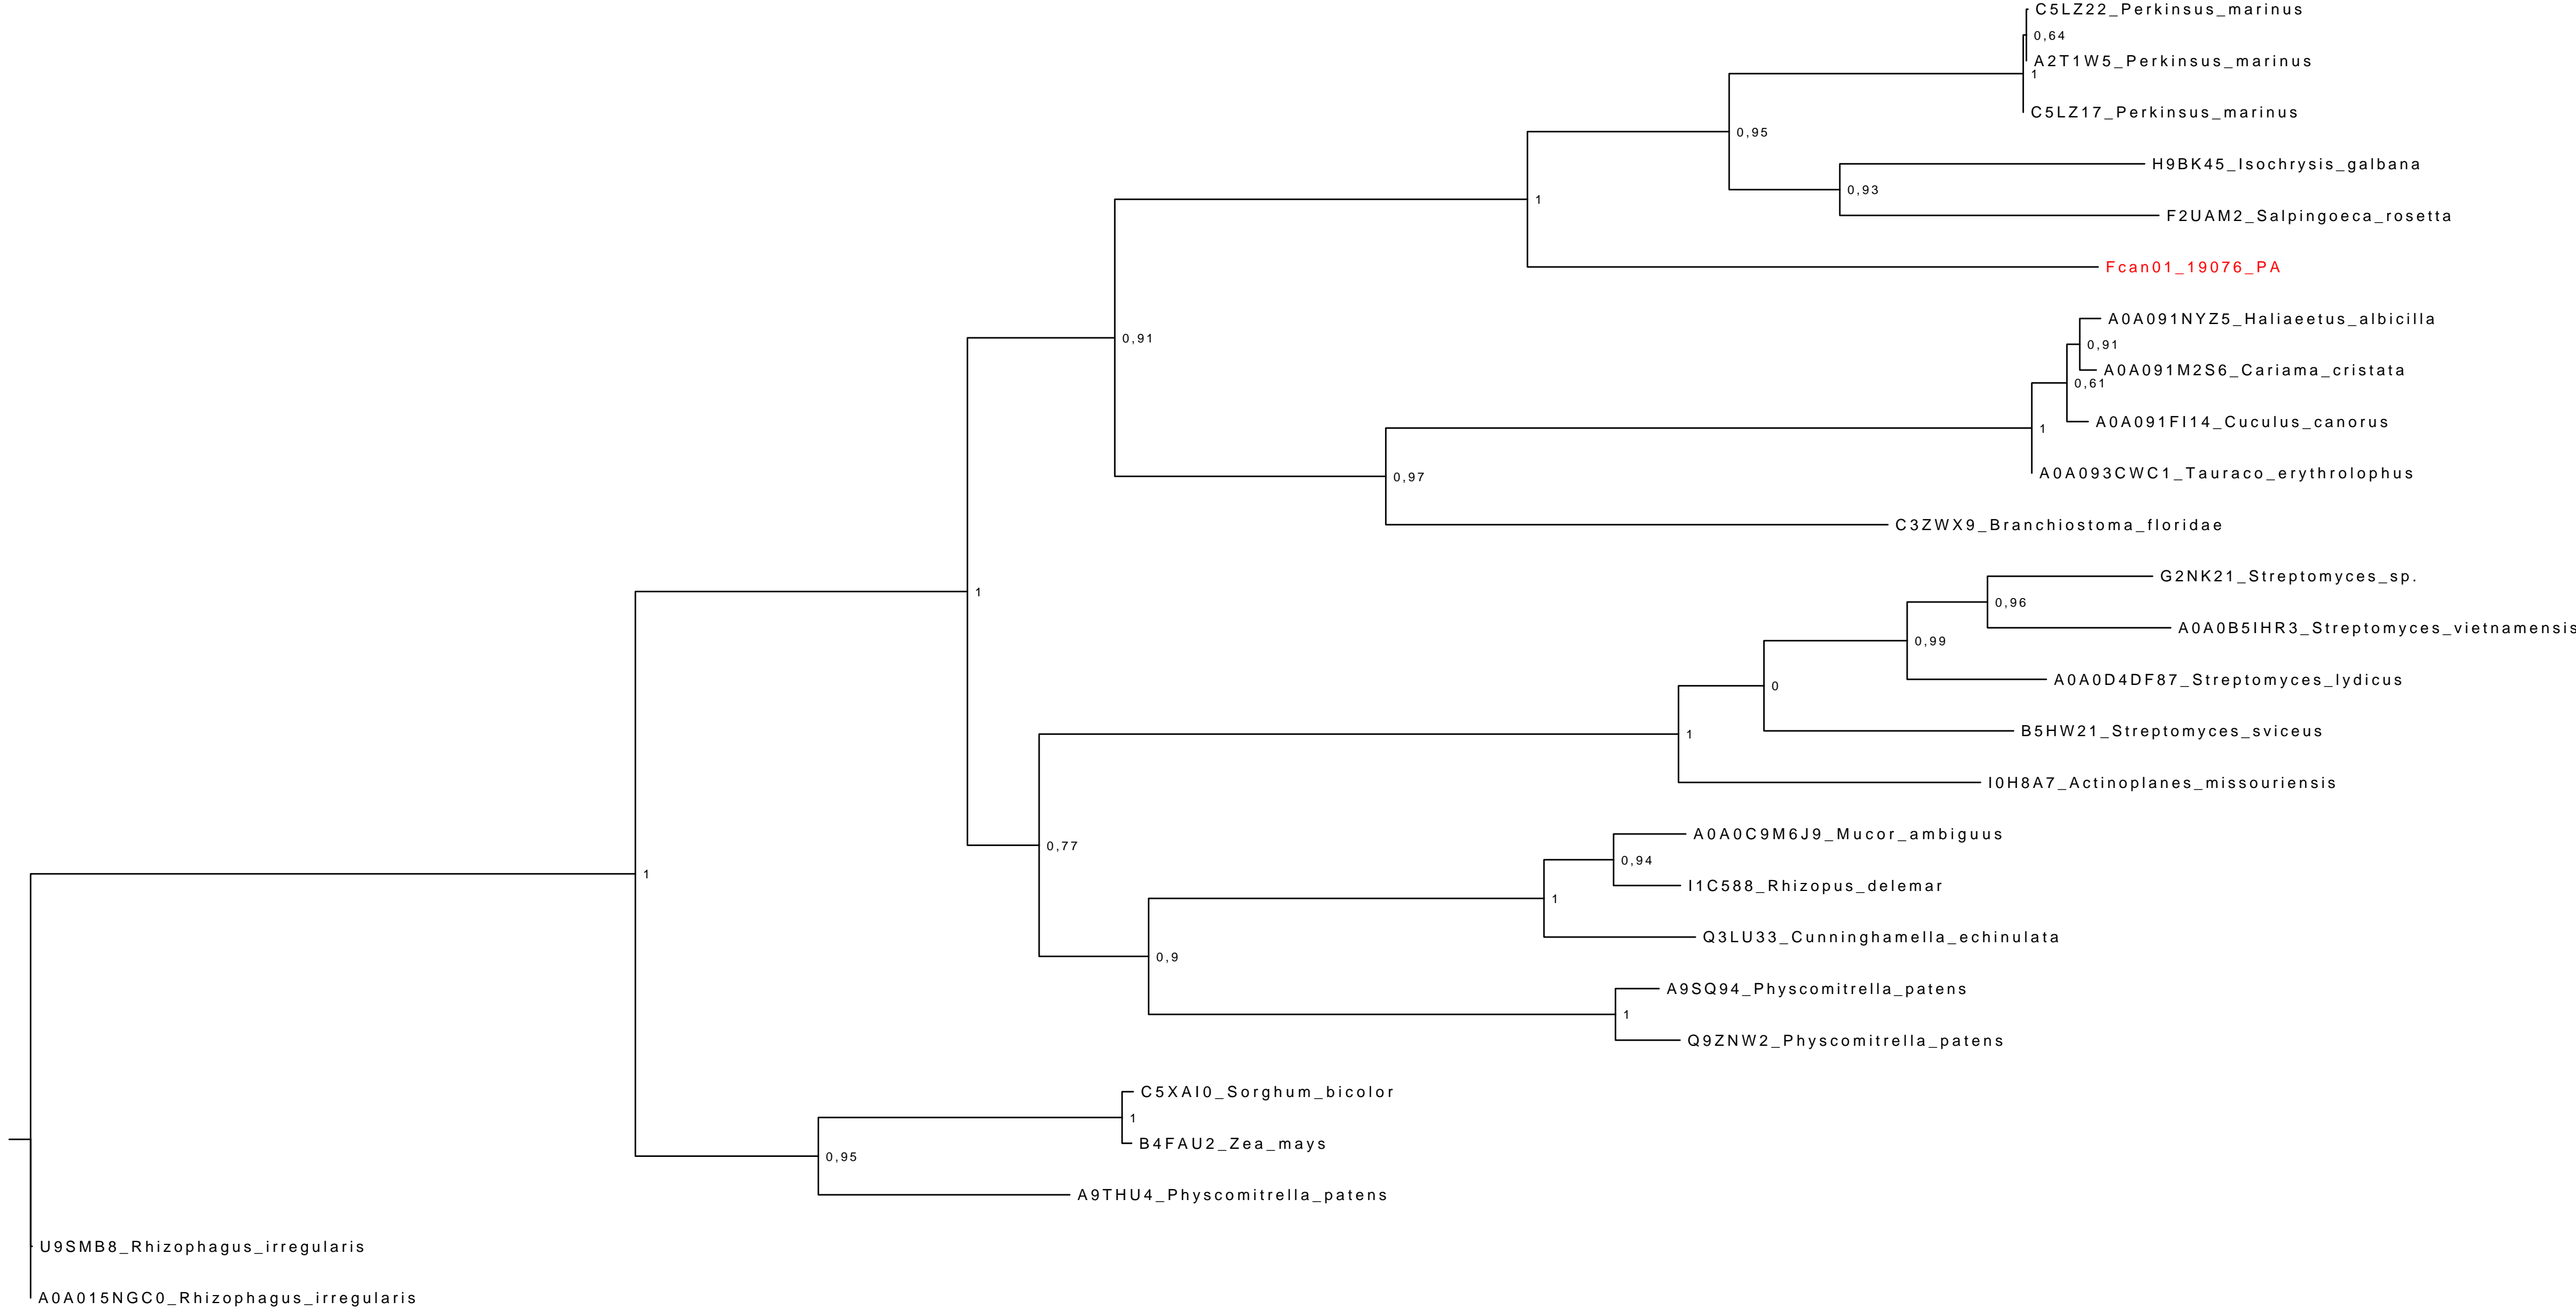

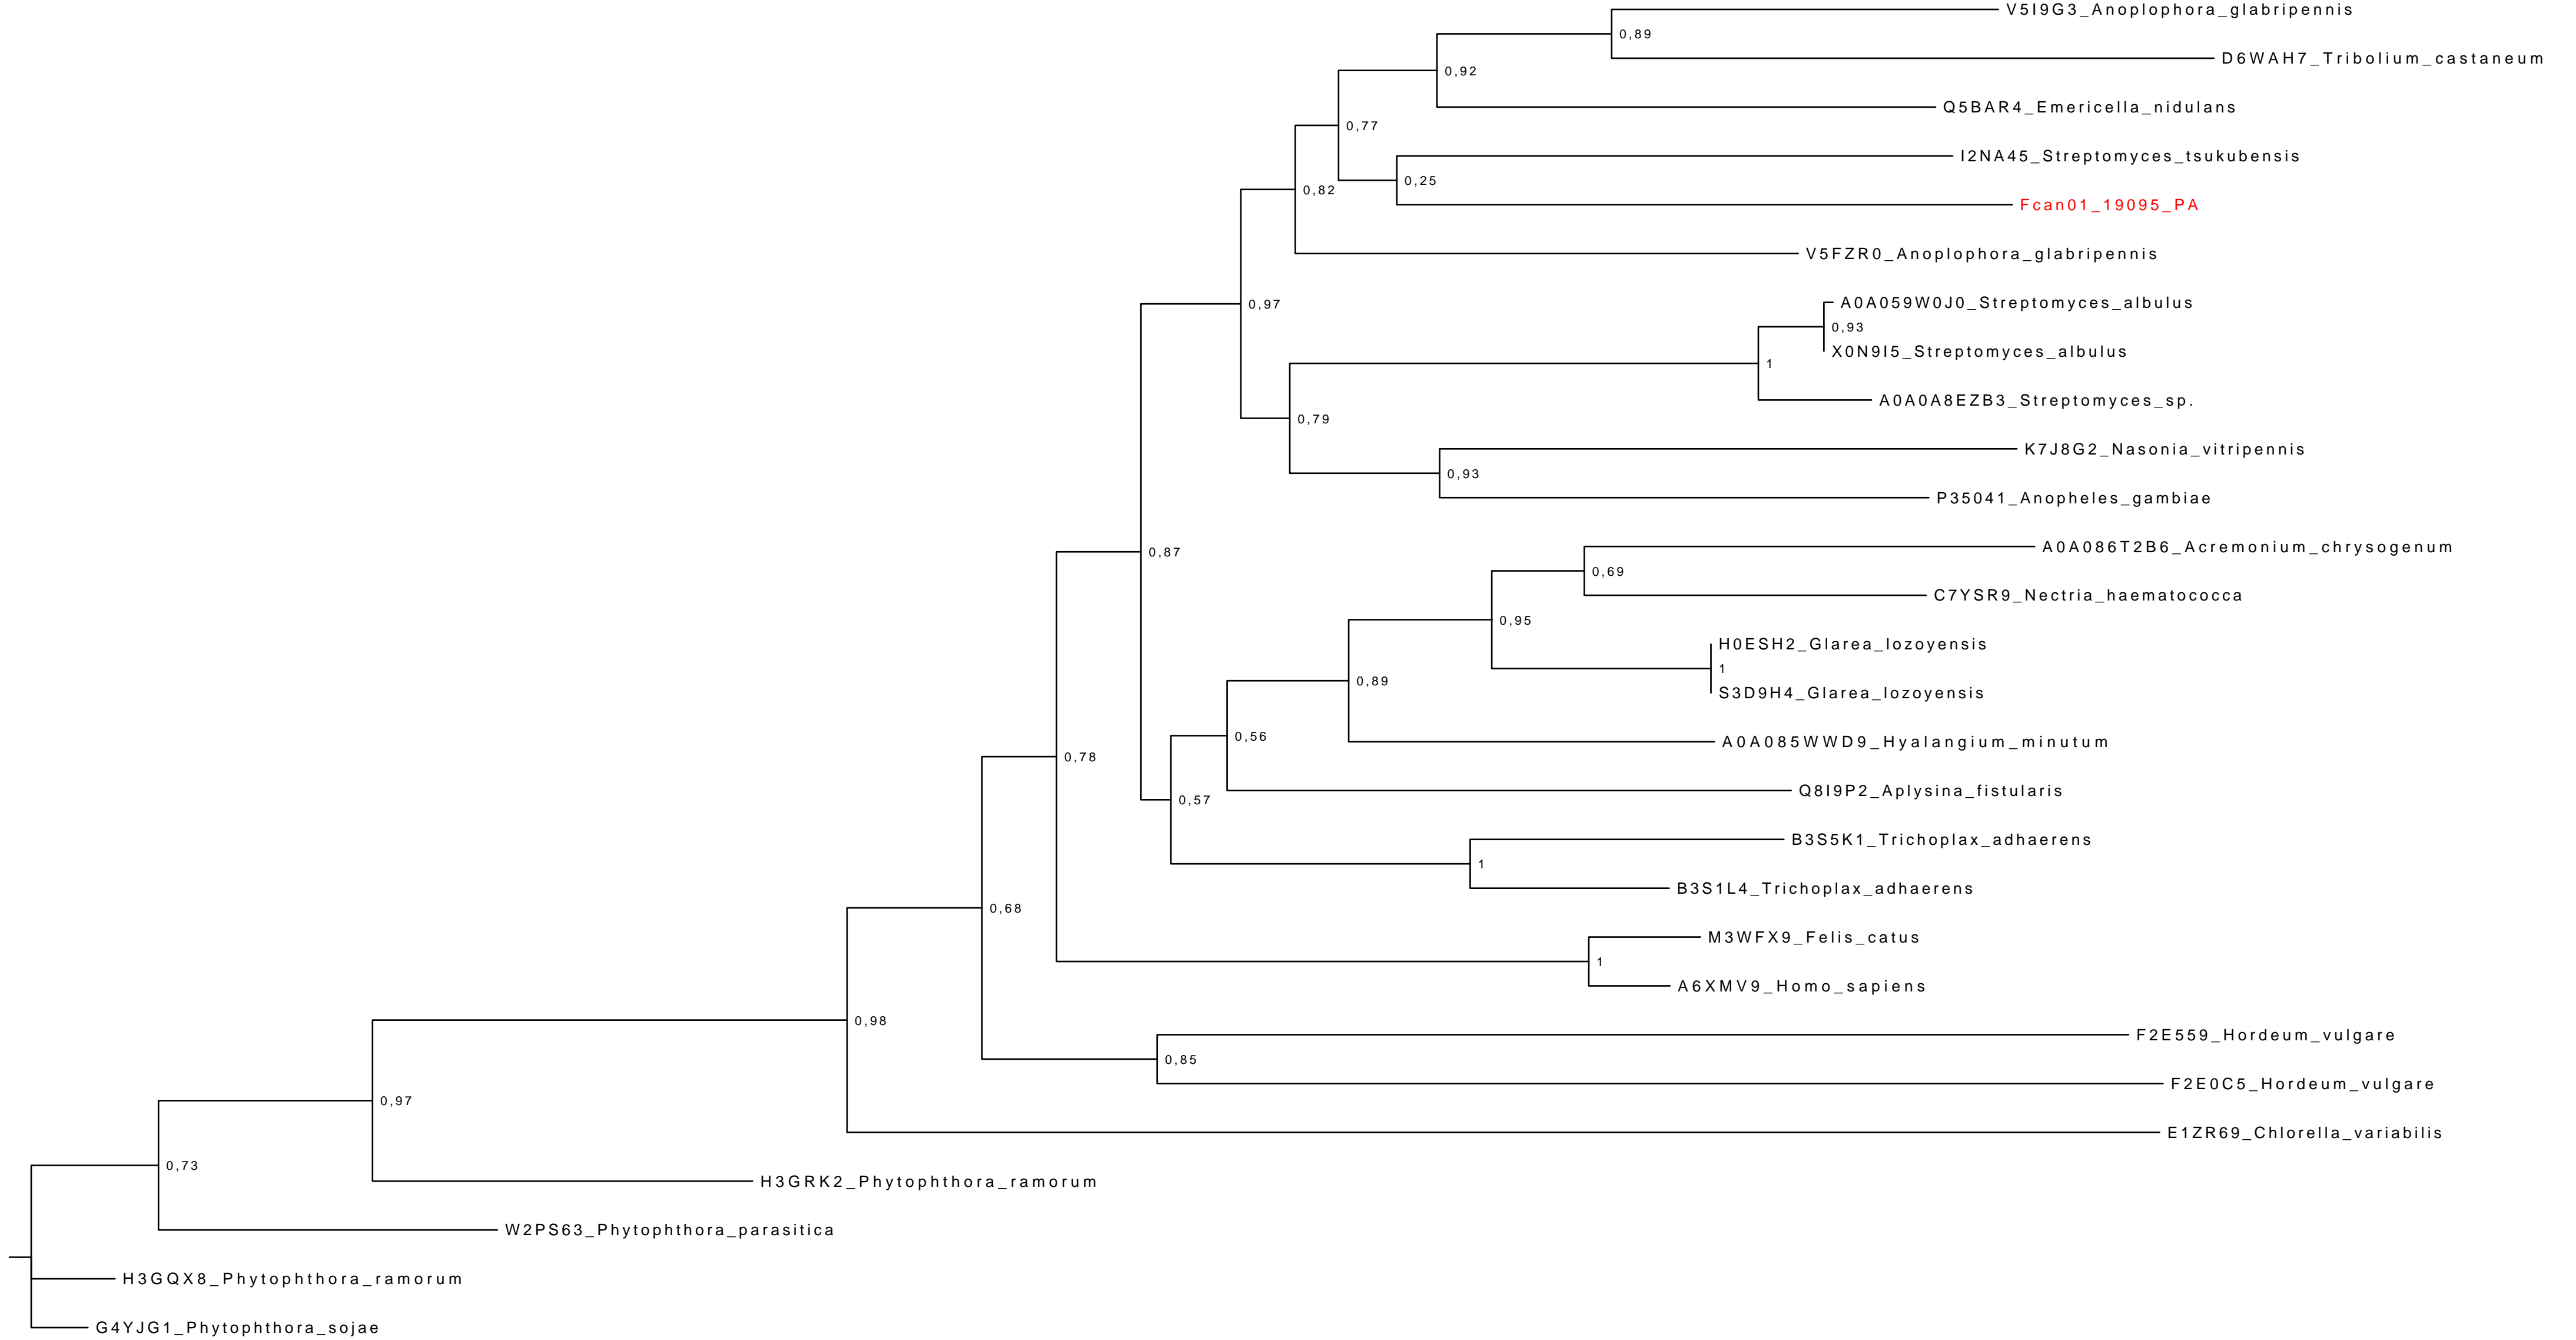

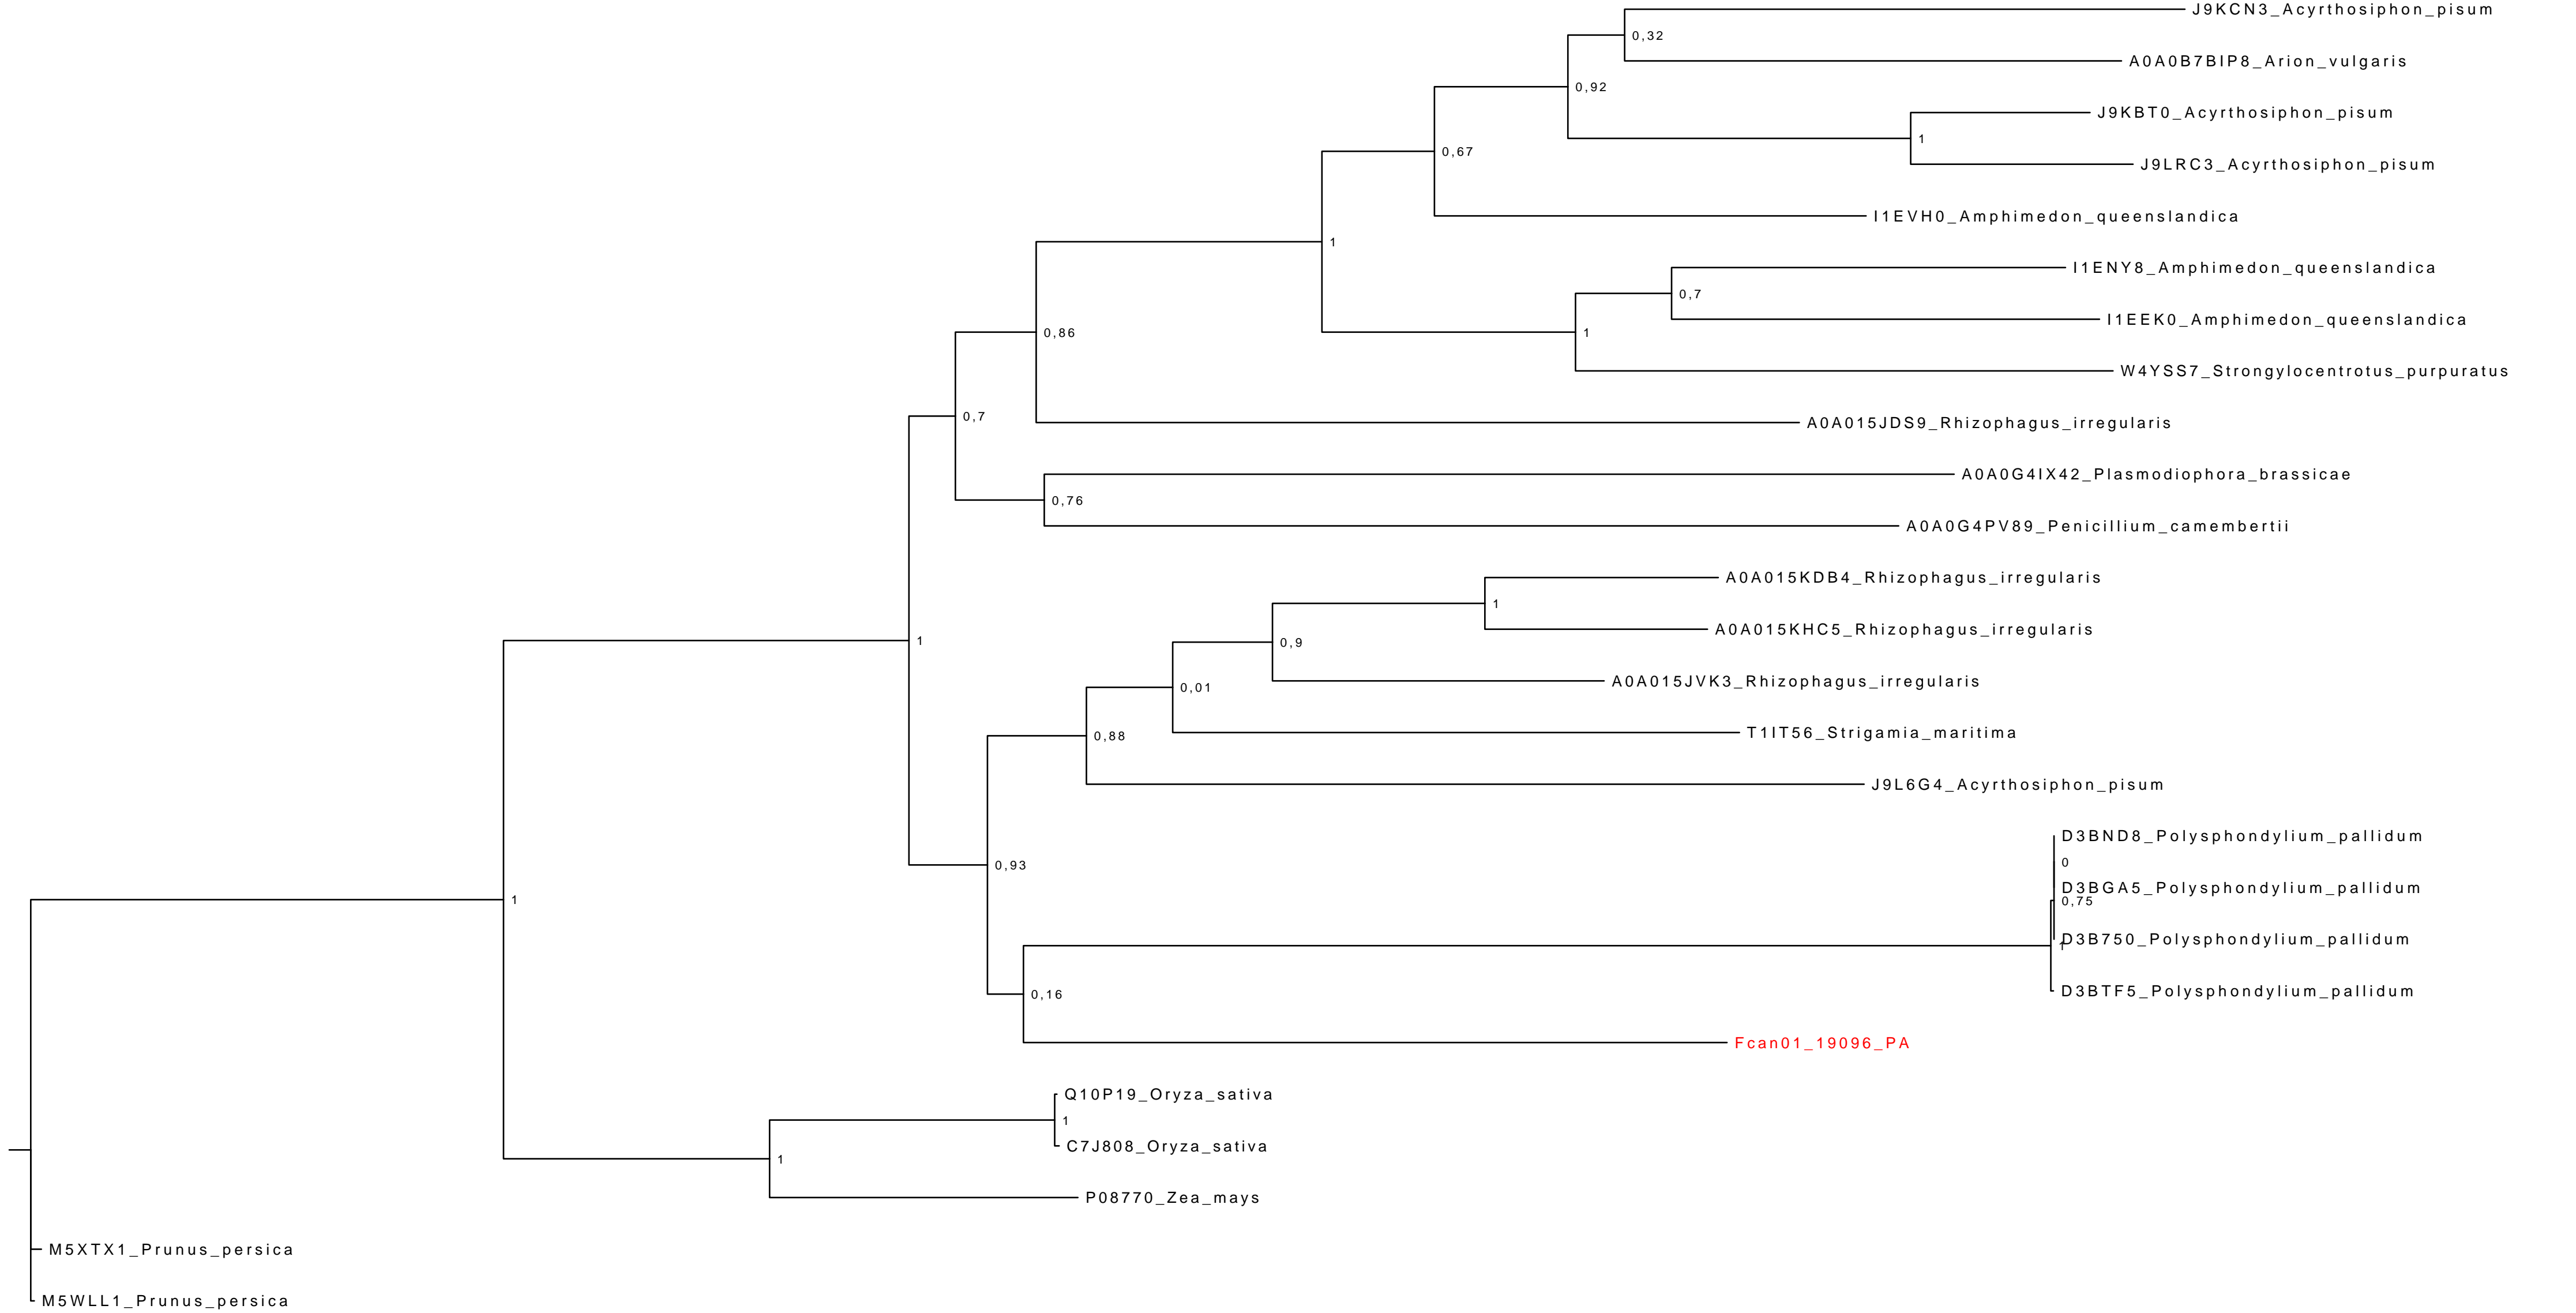

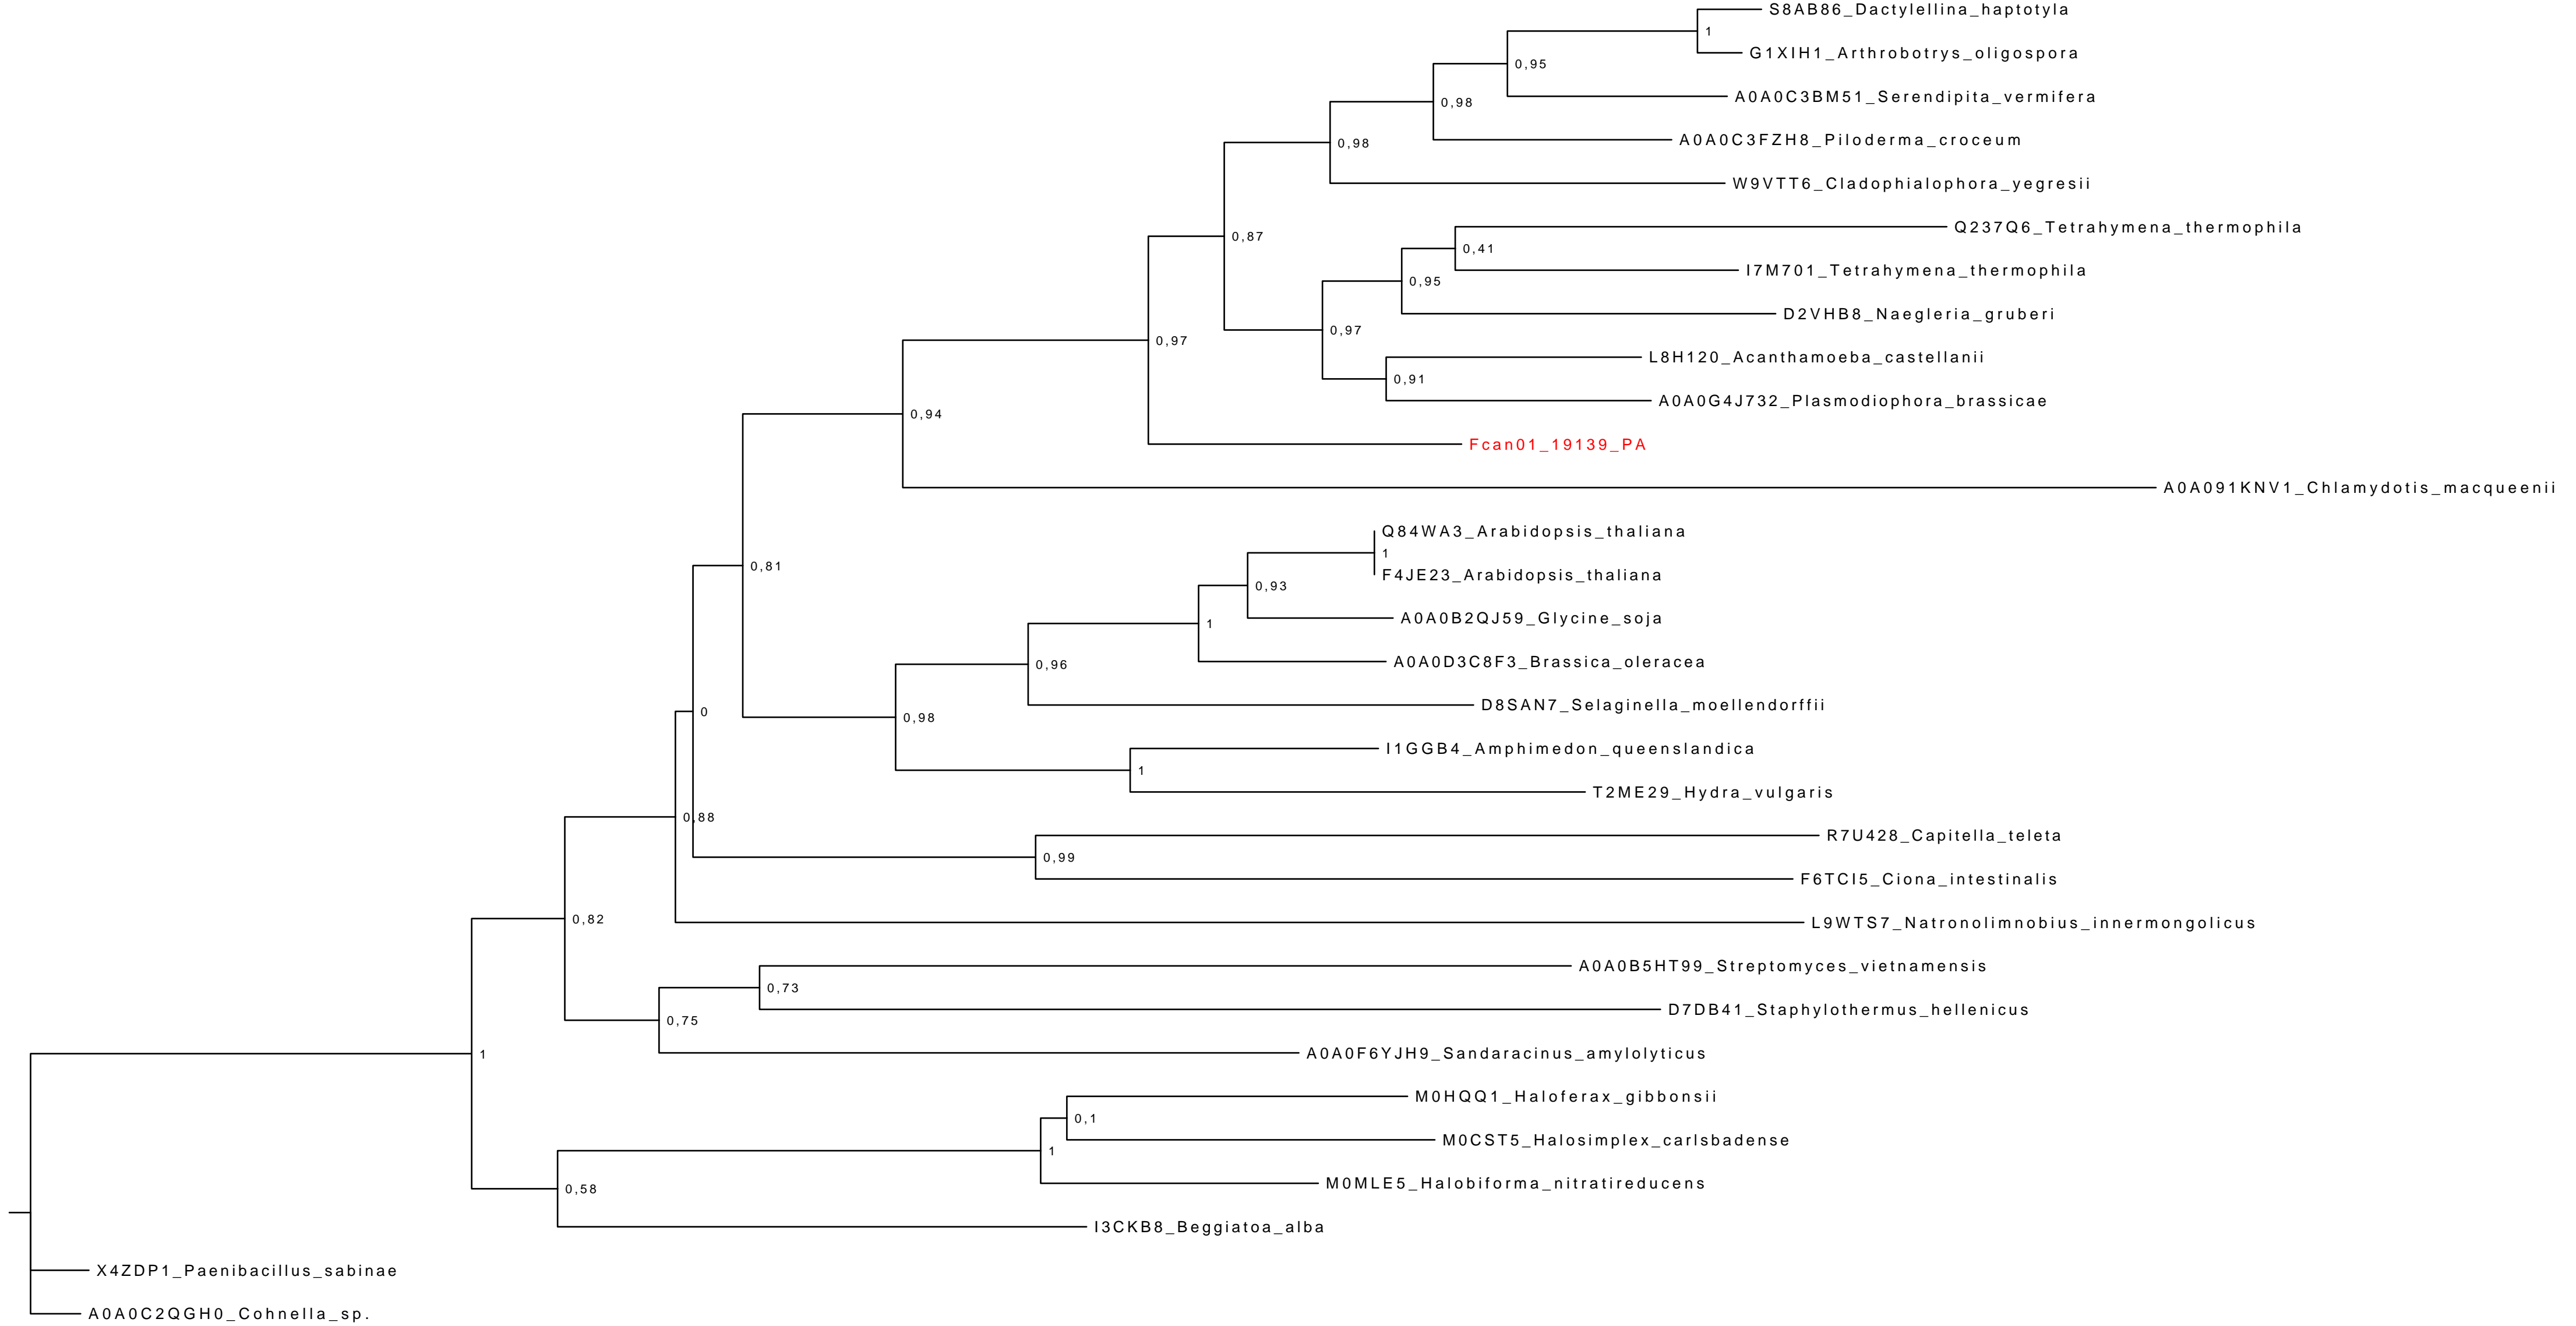



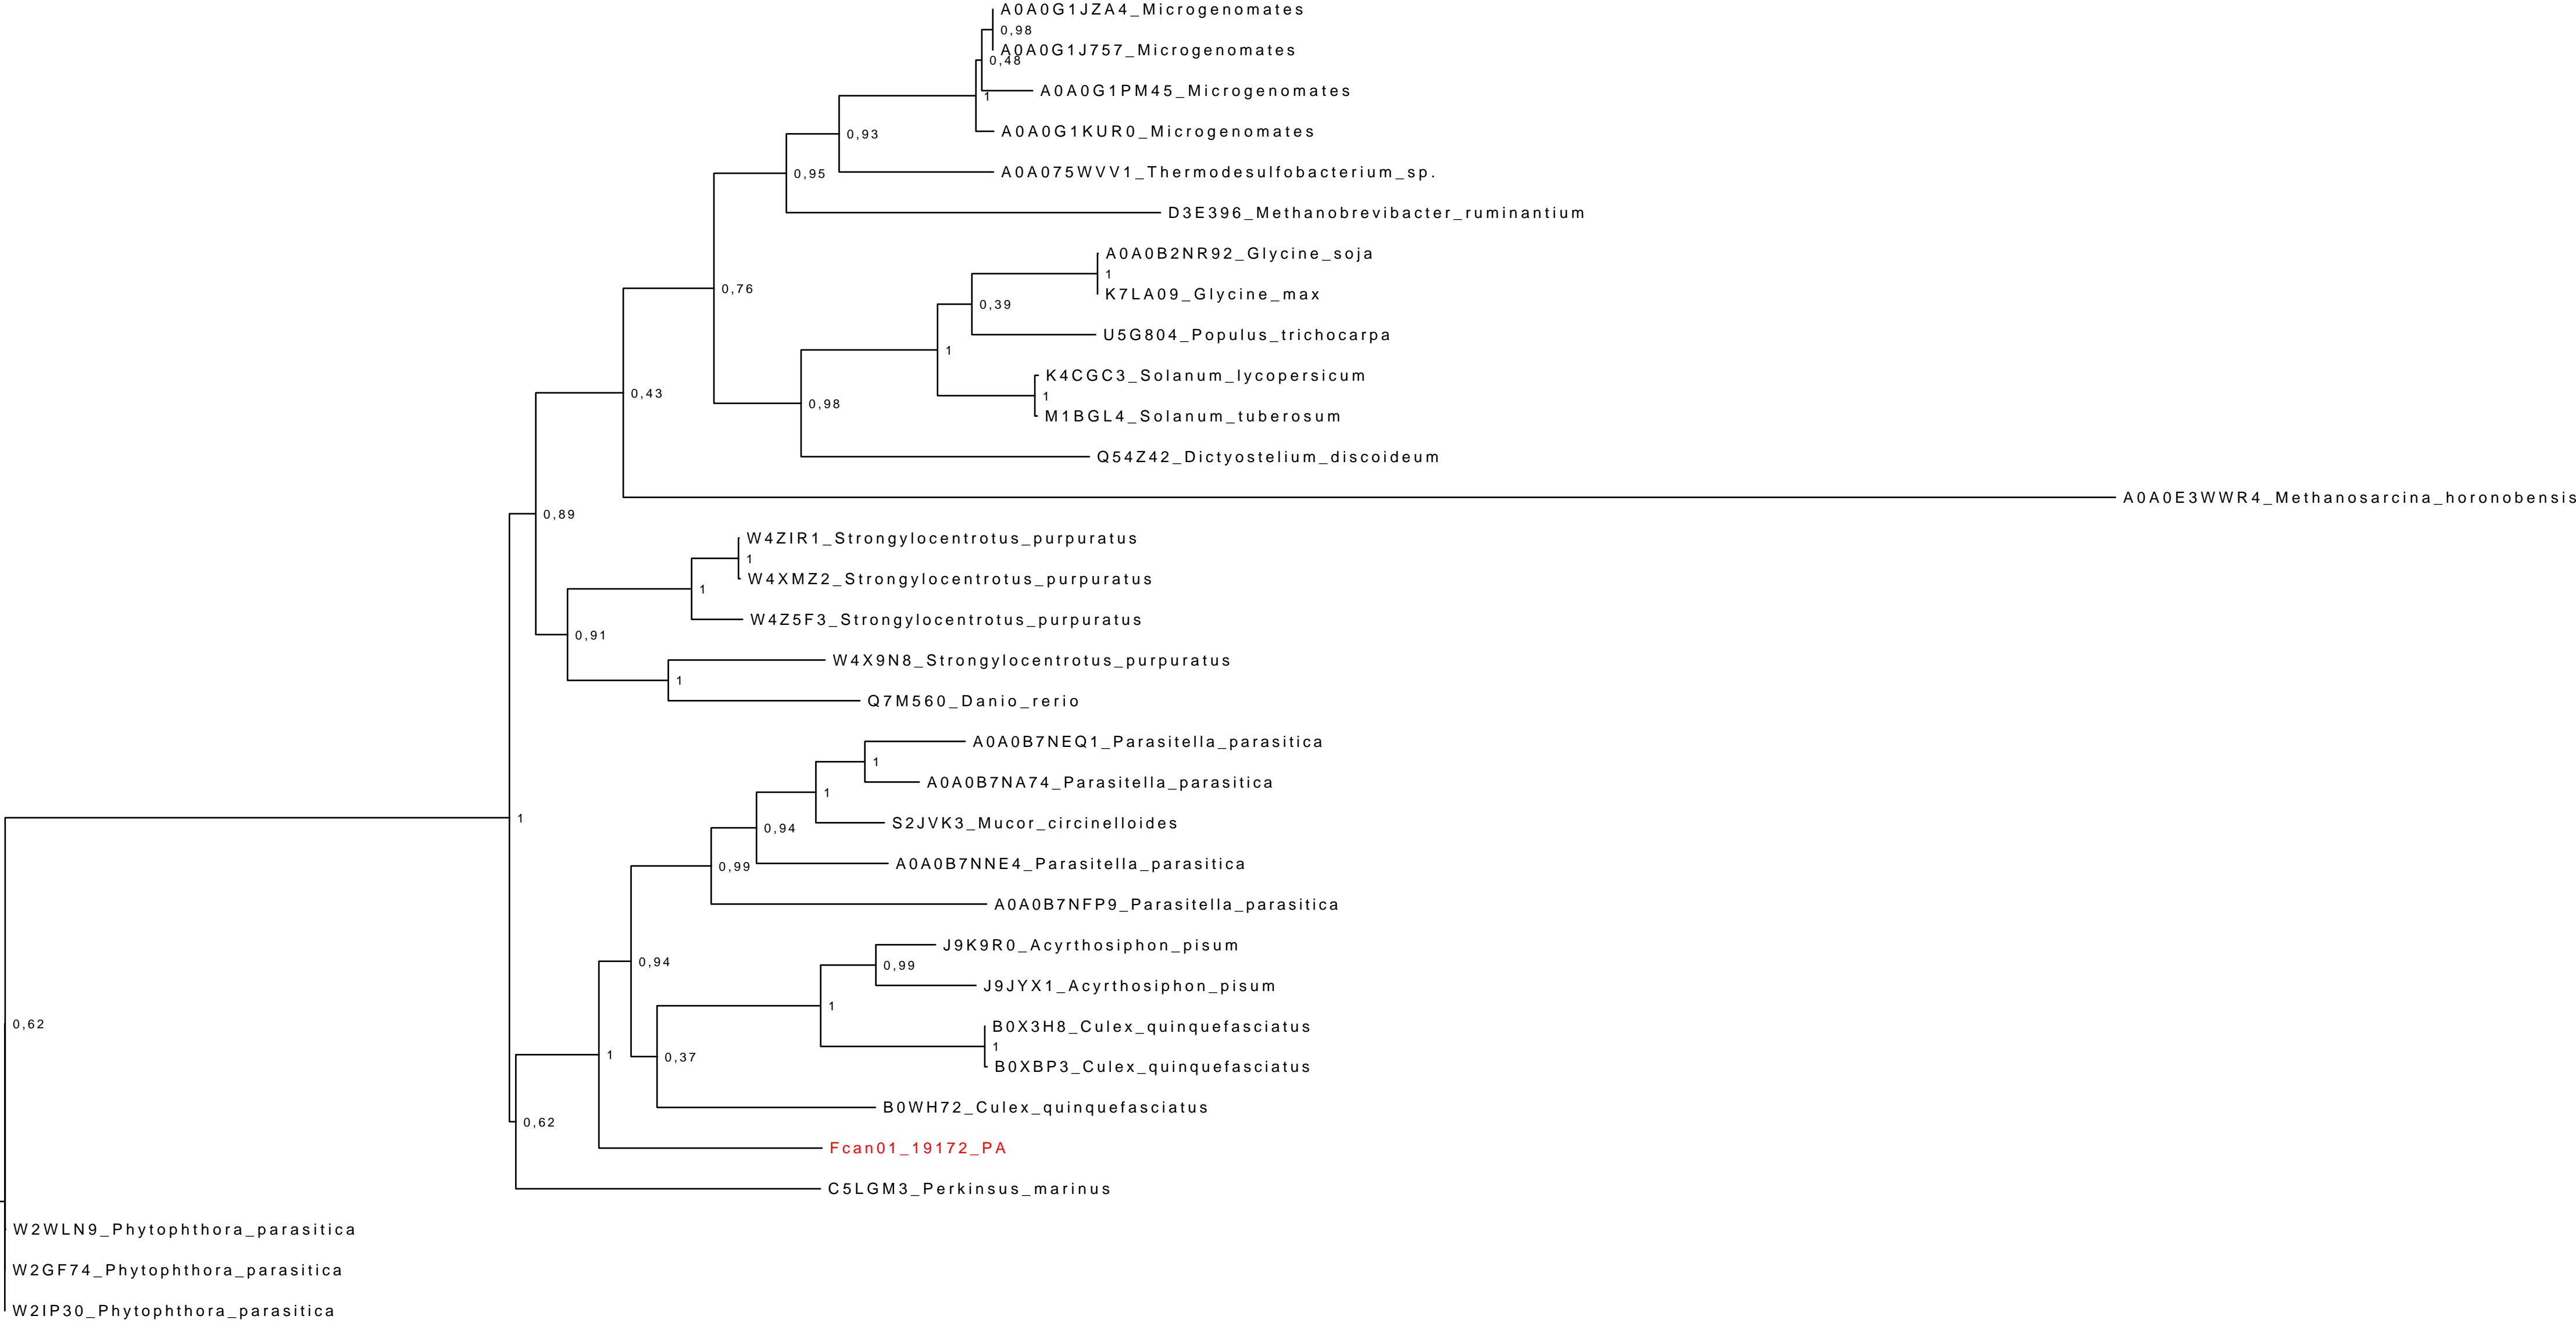

0.9

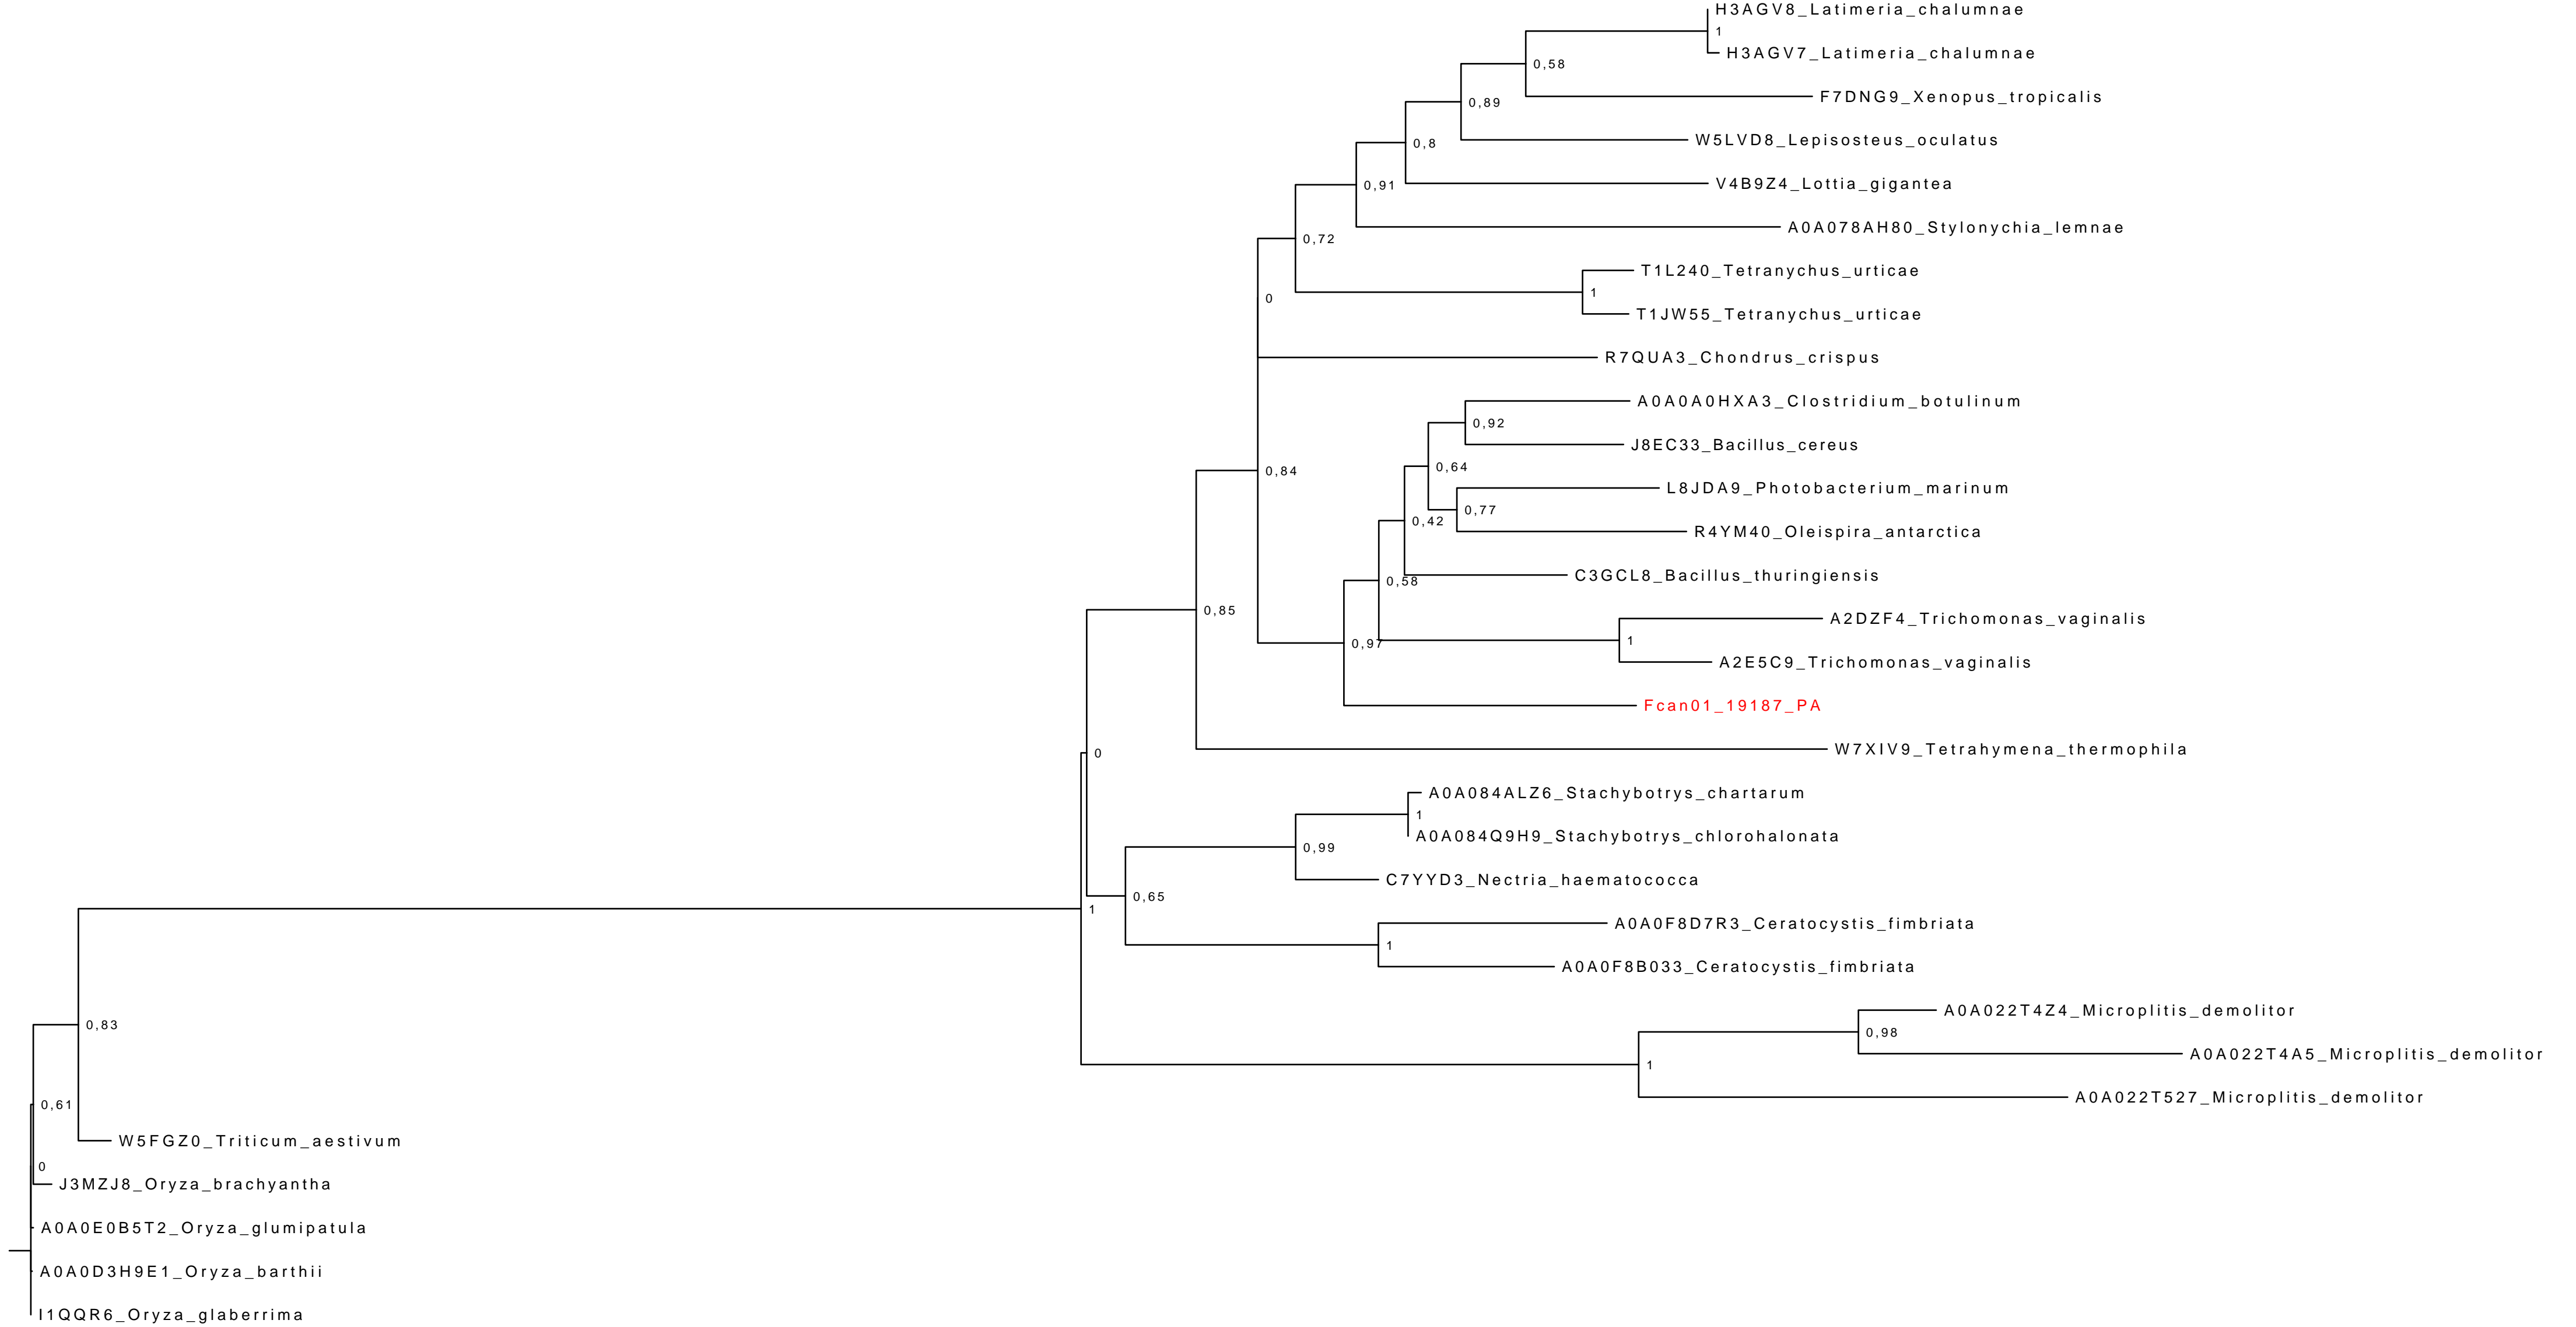

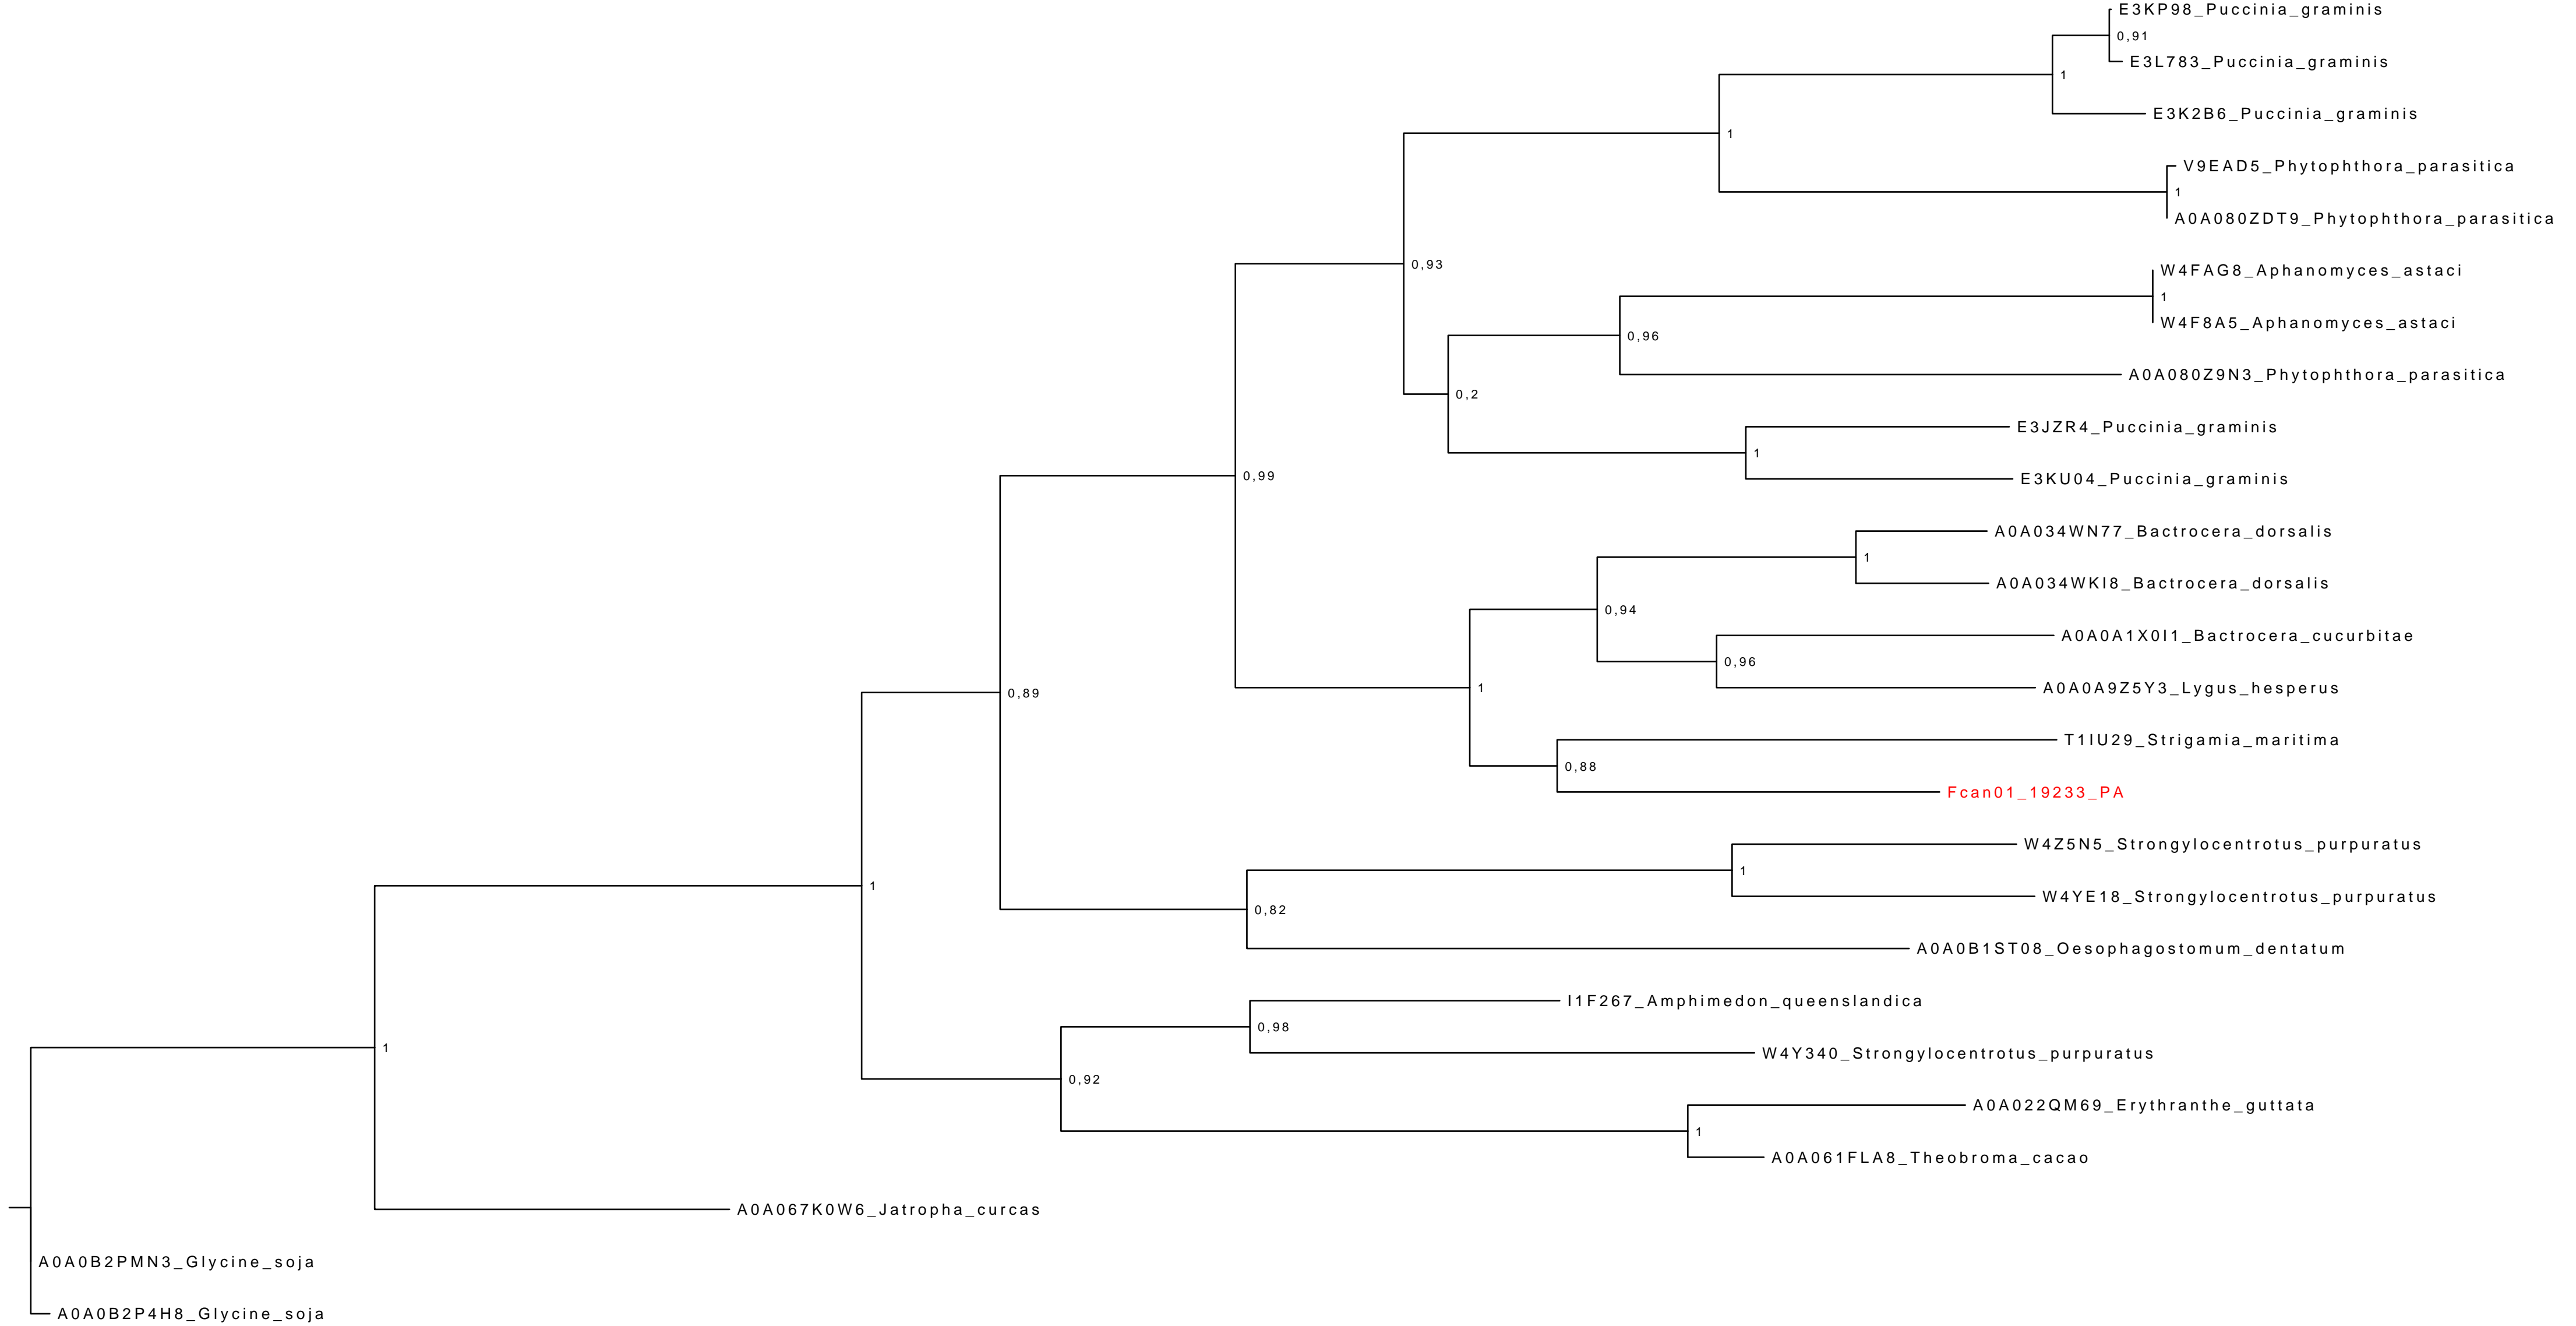

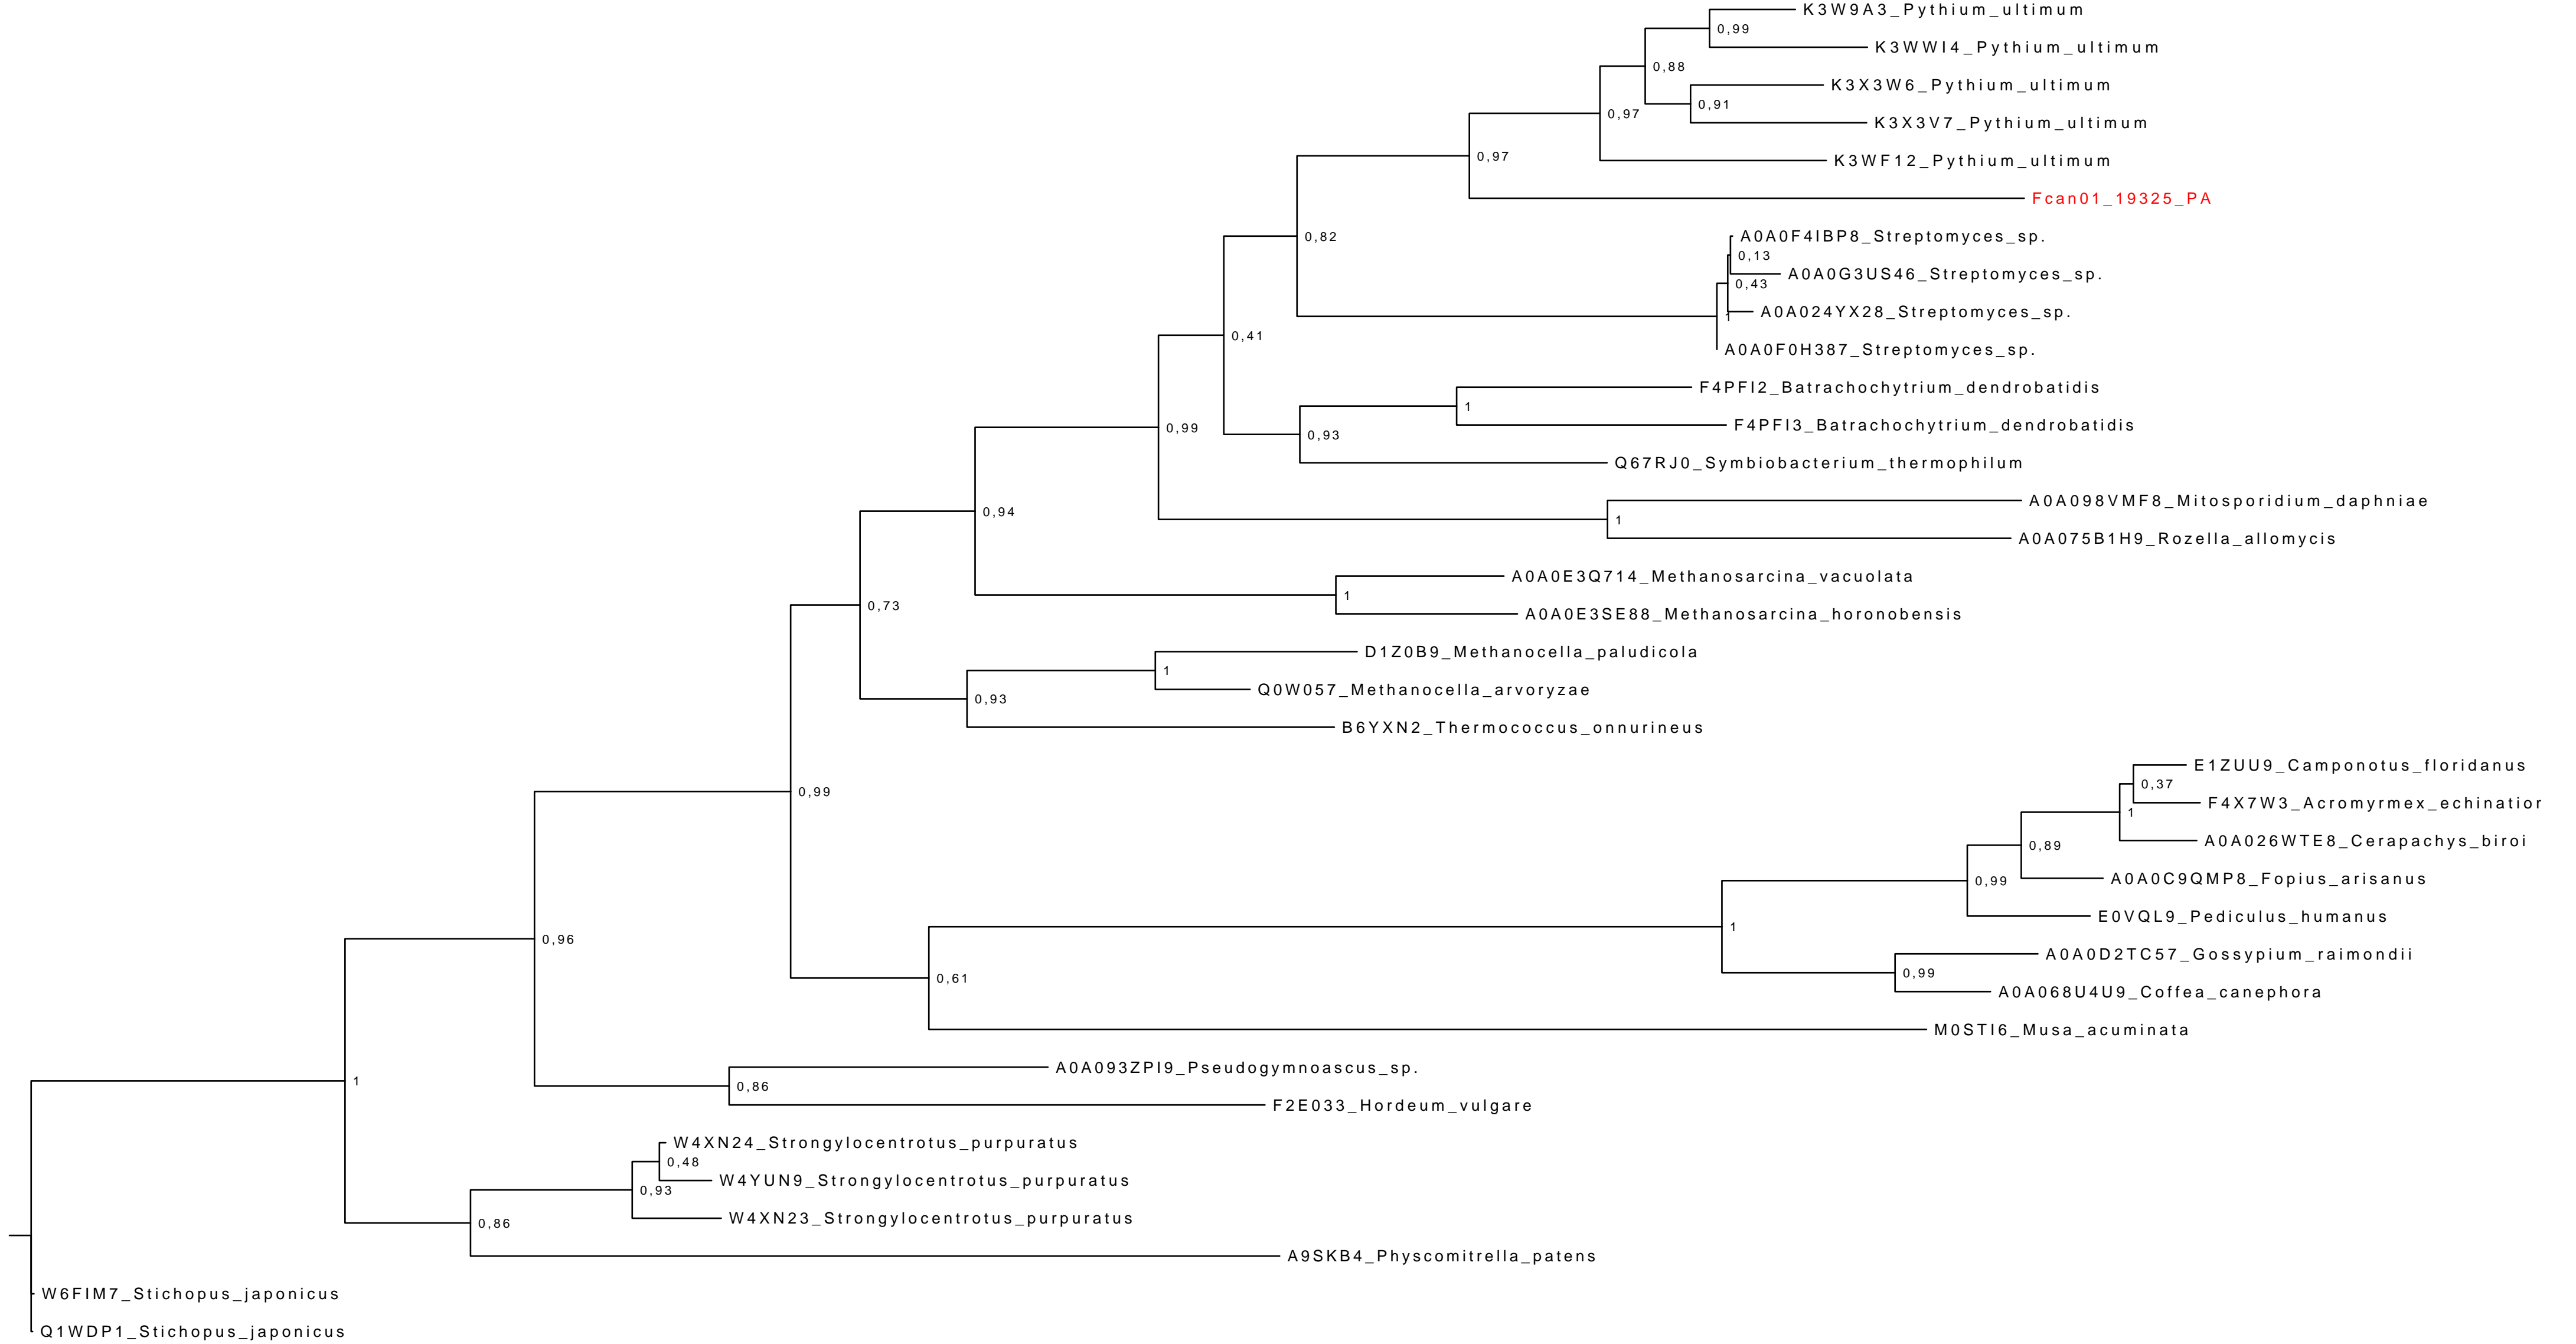

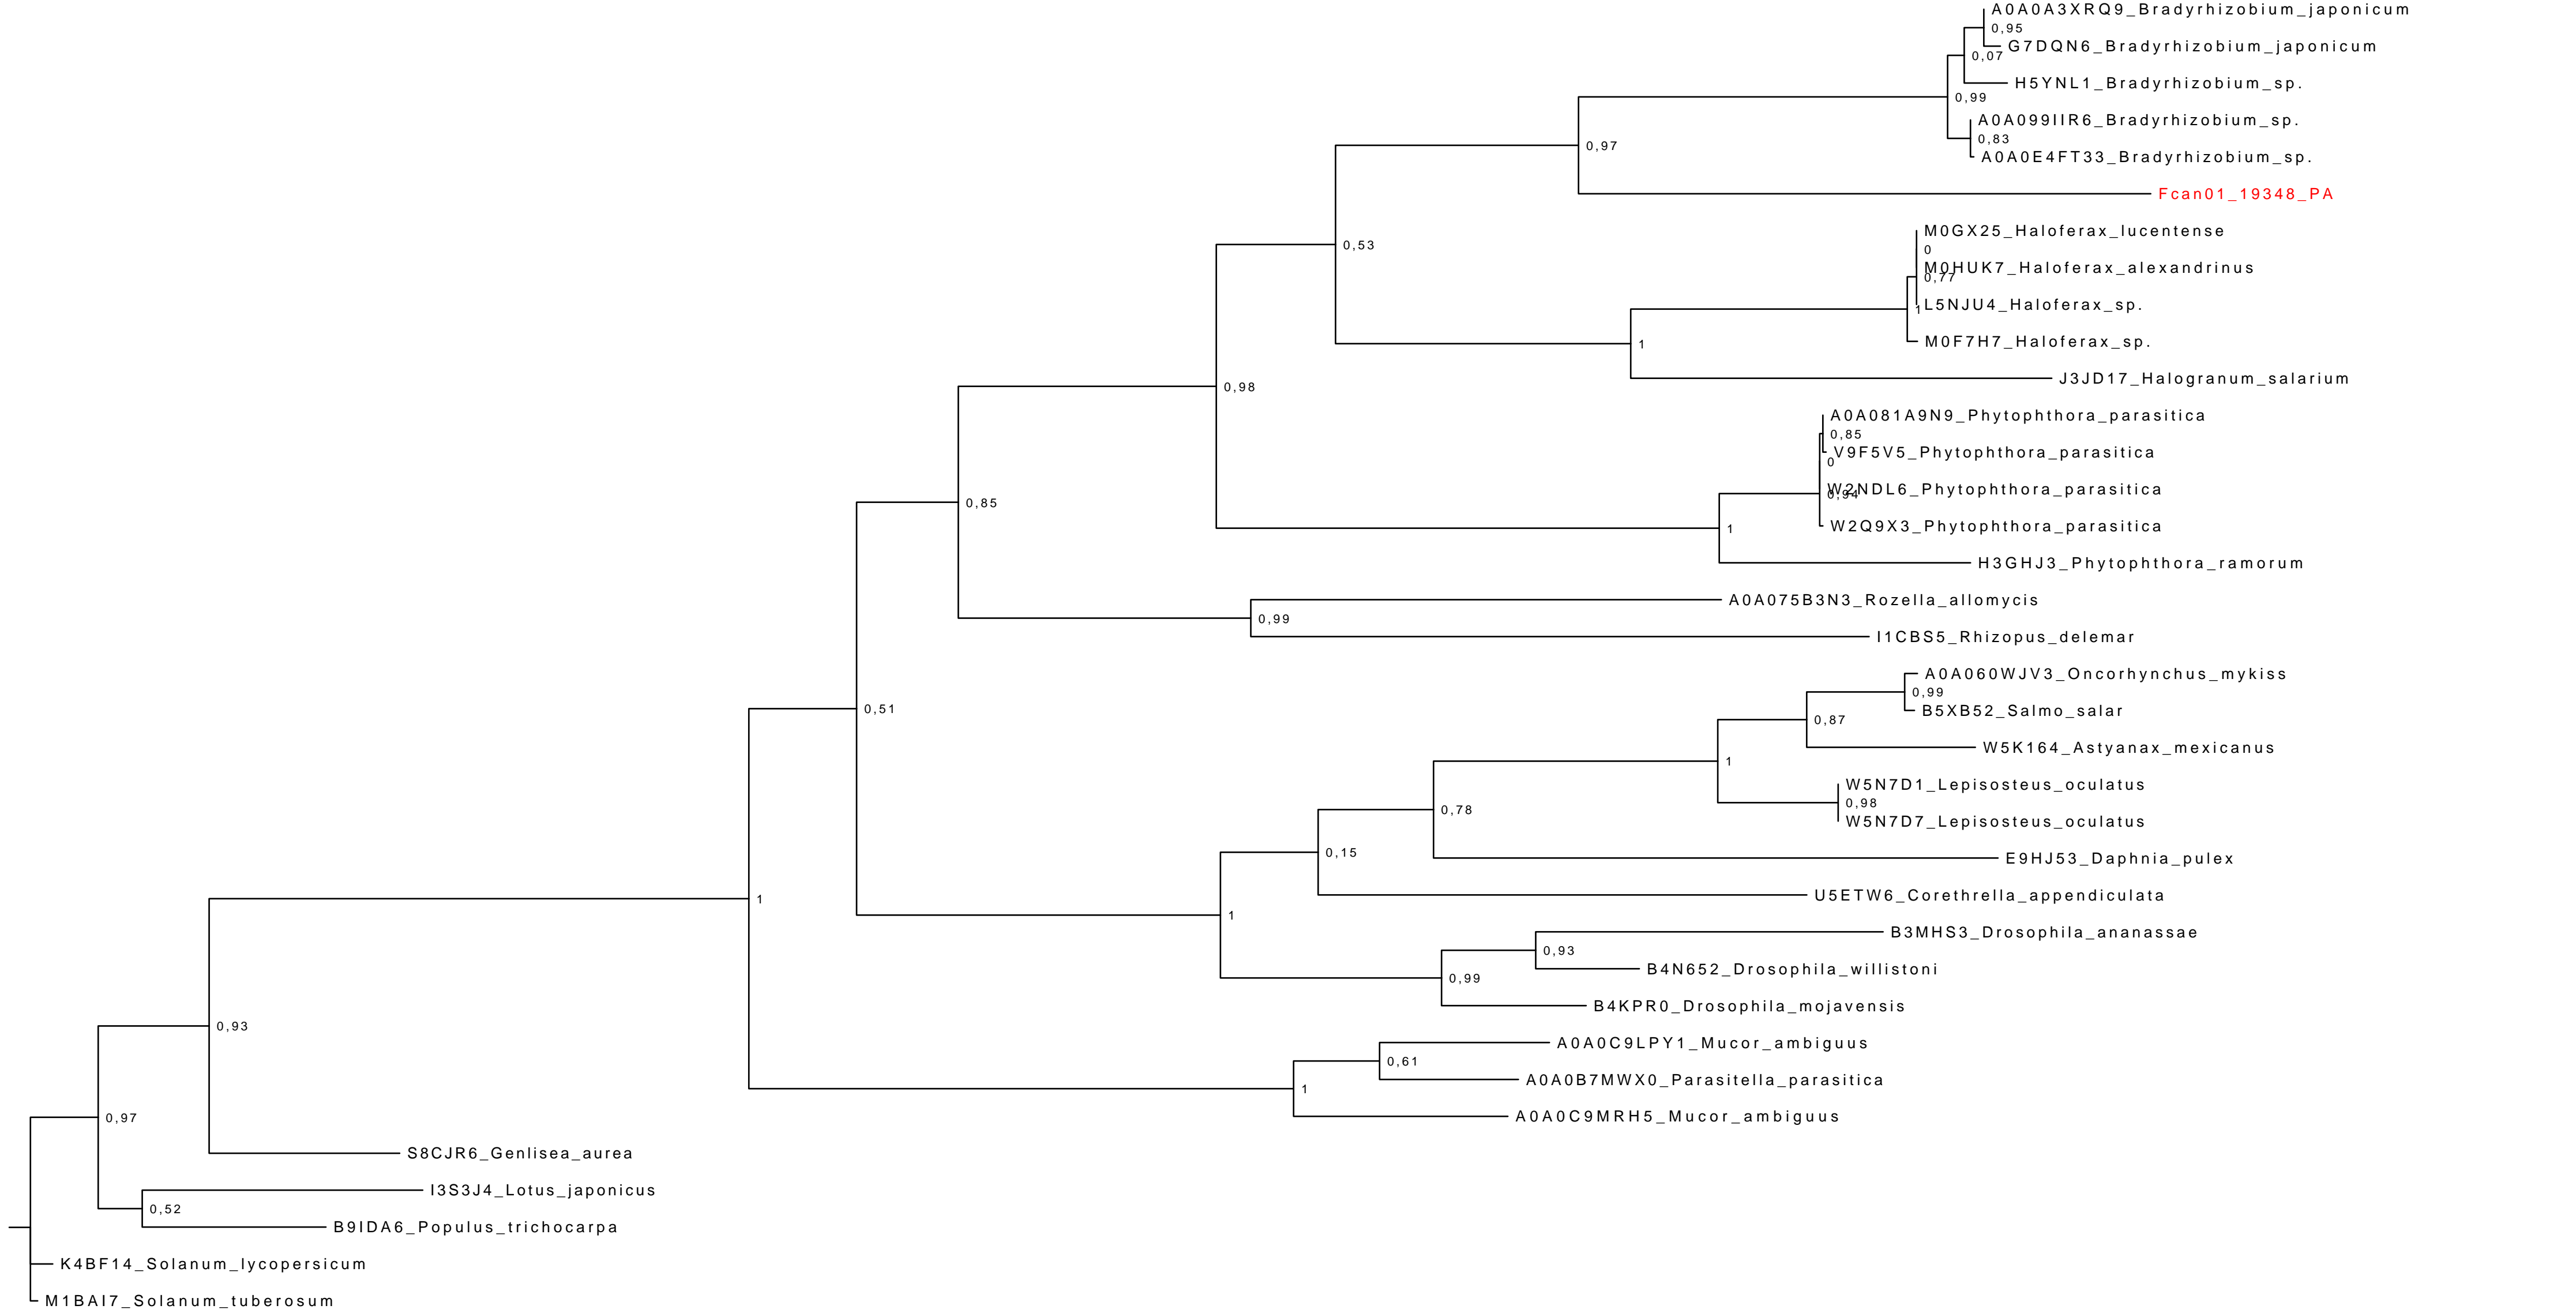

0.3

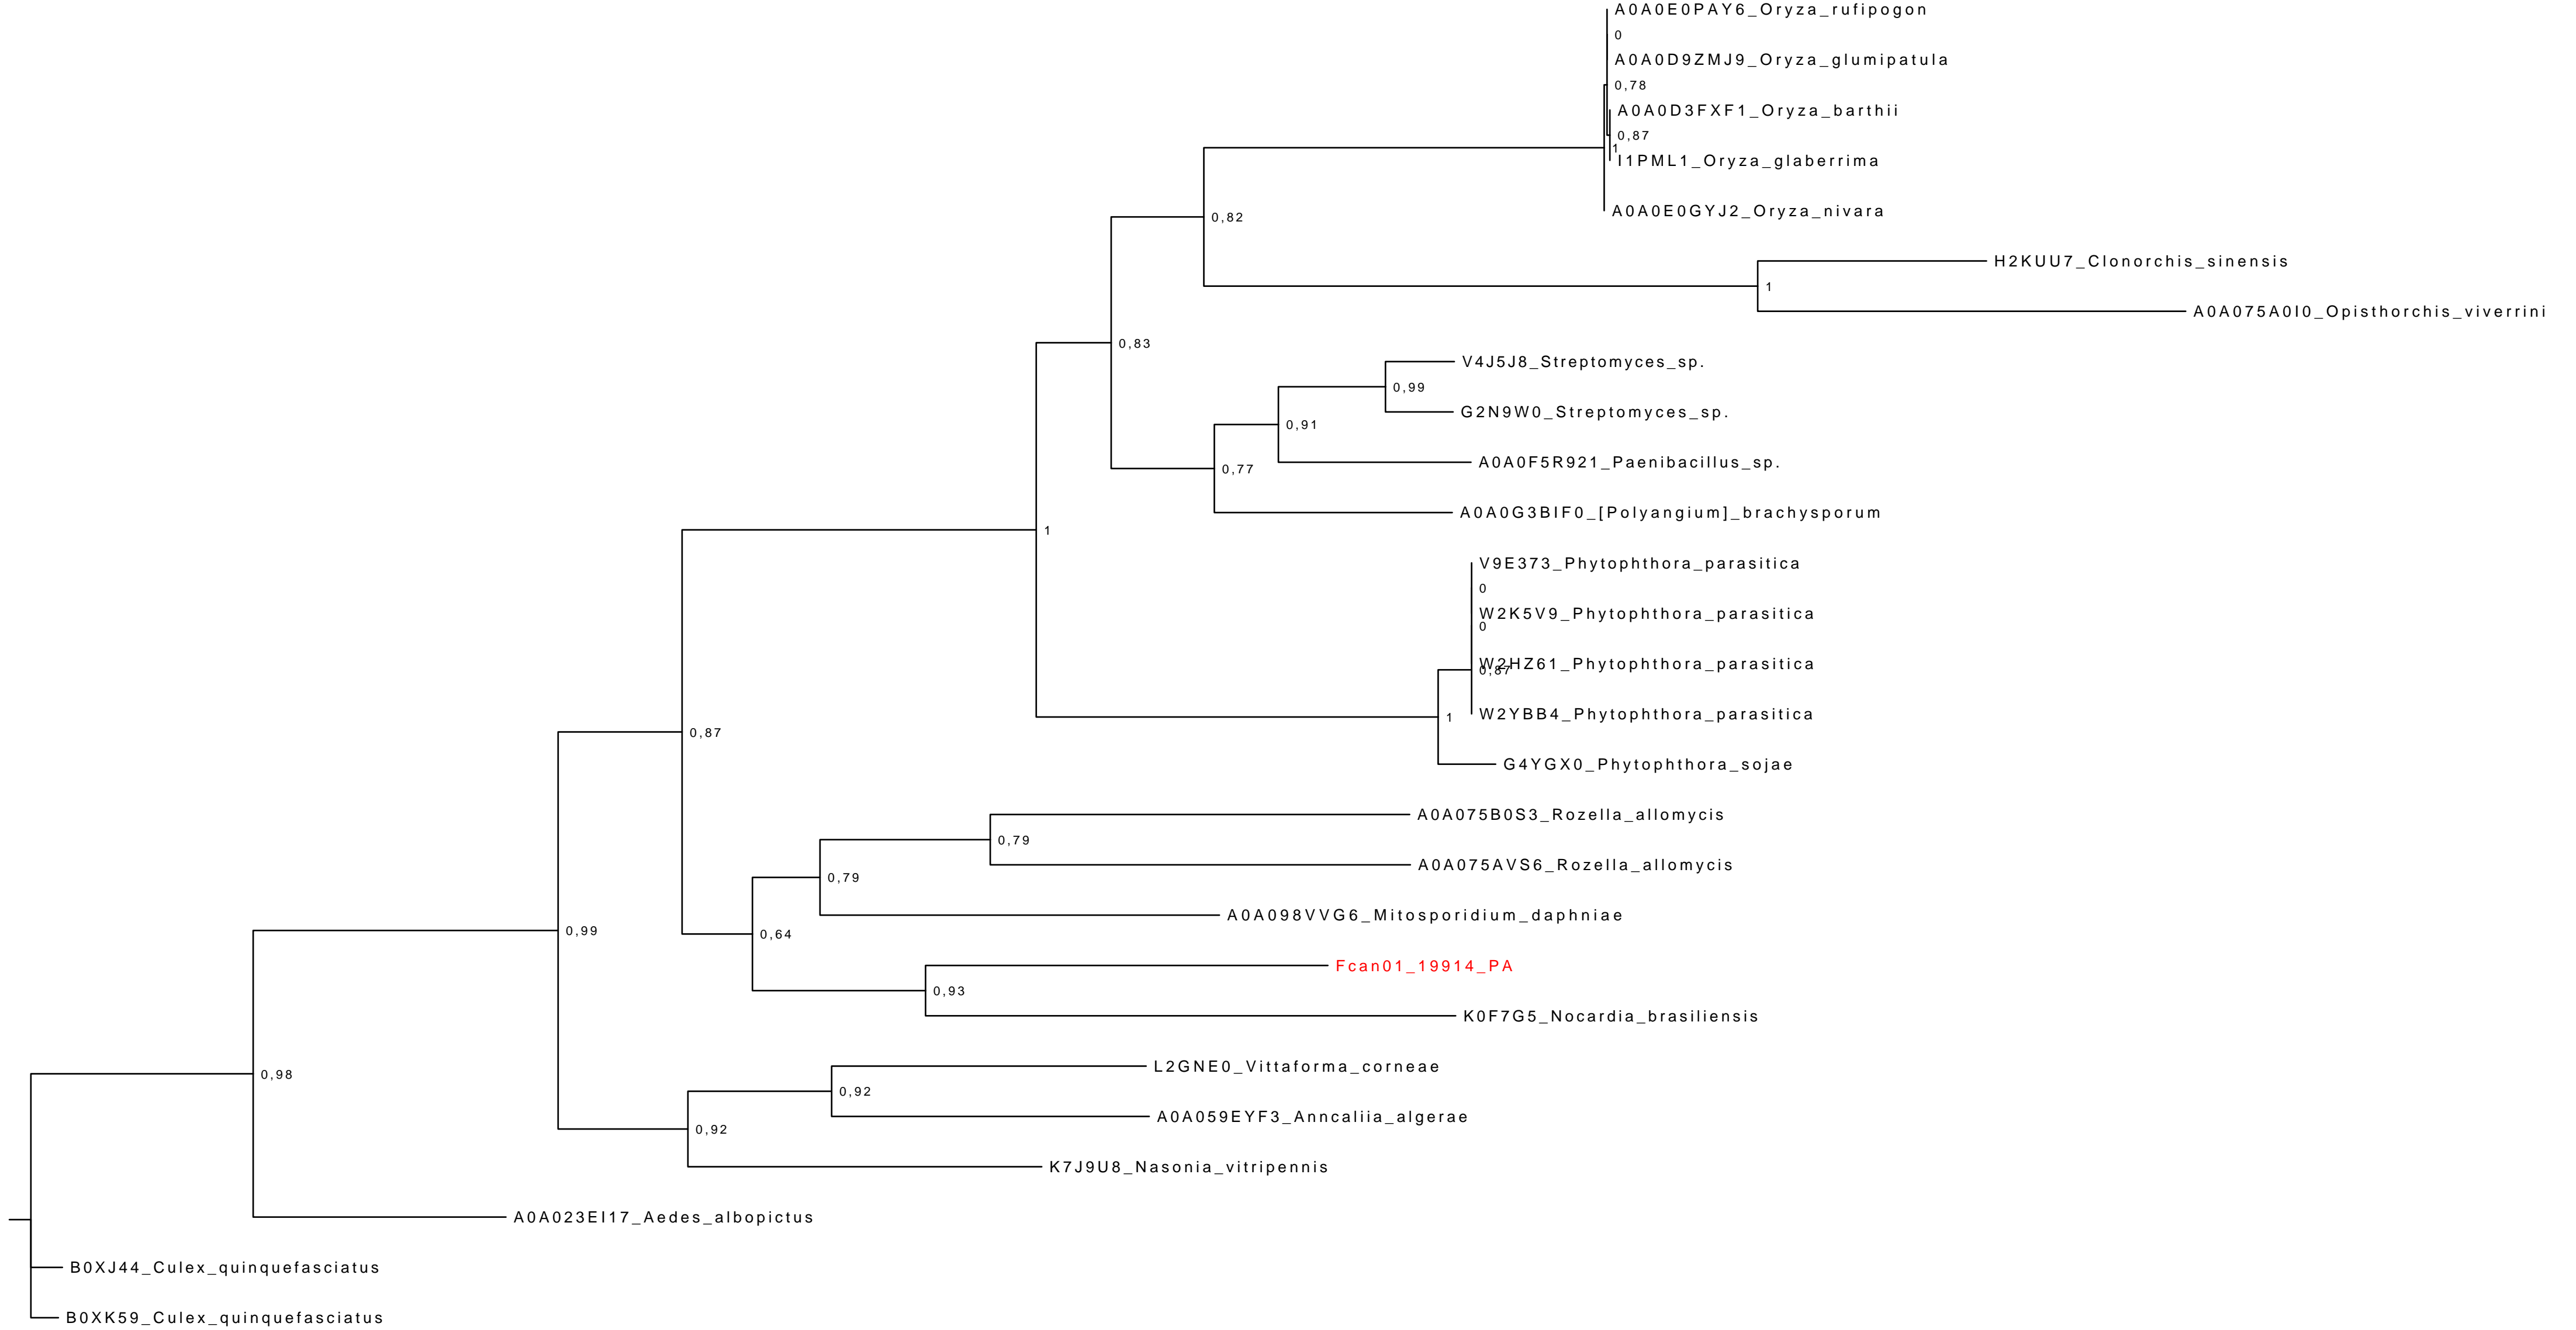

0.4

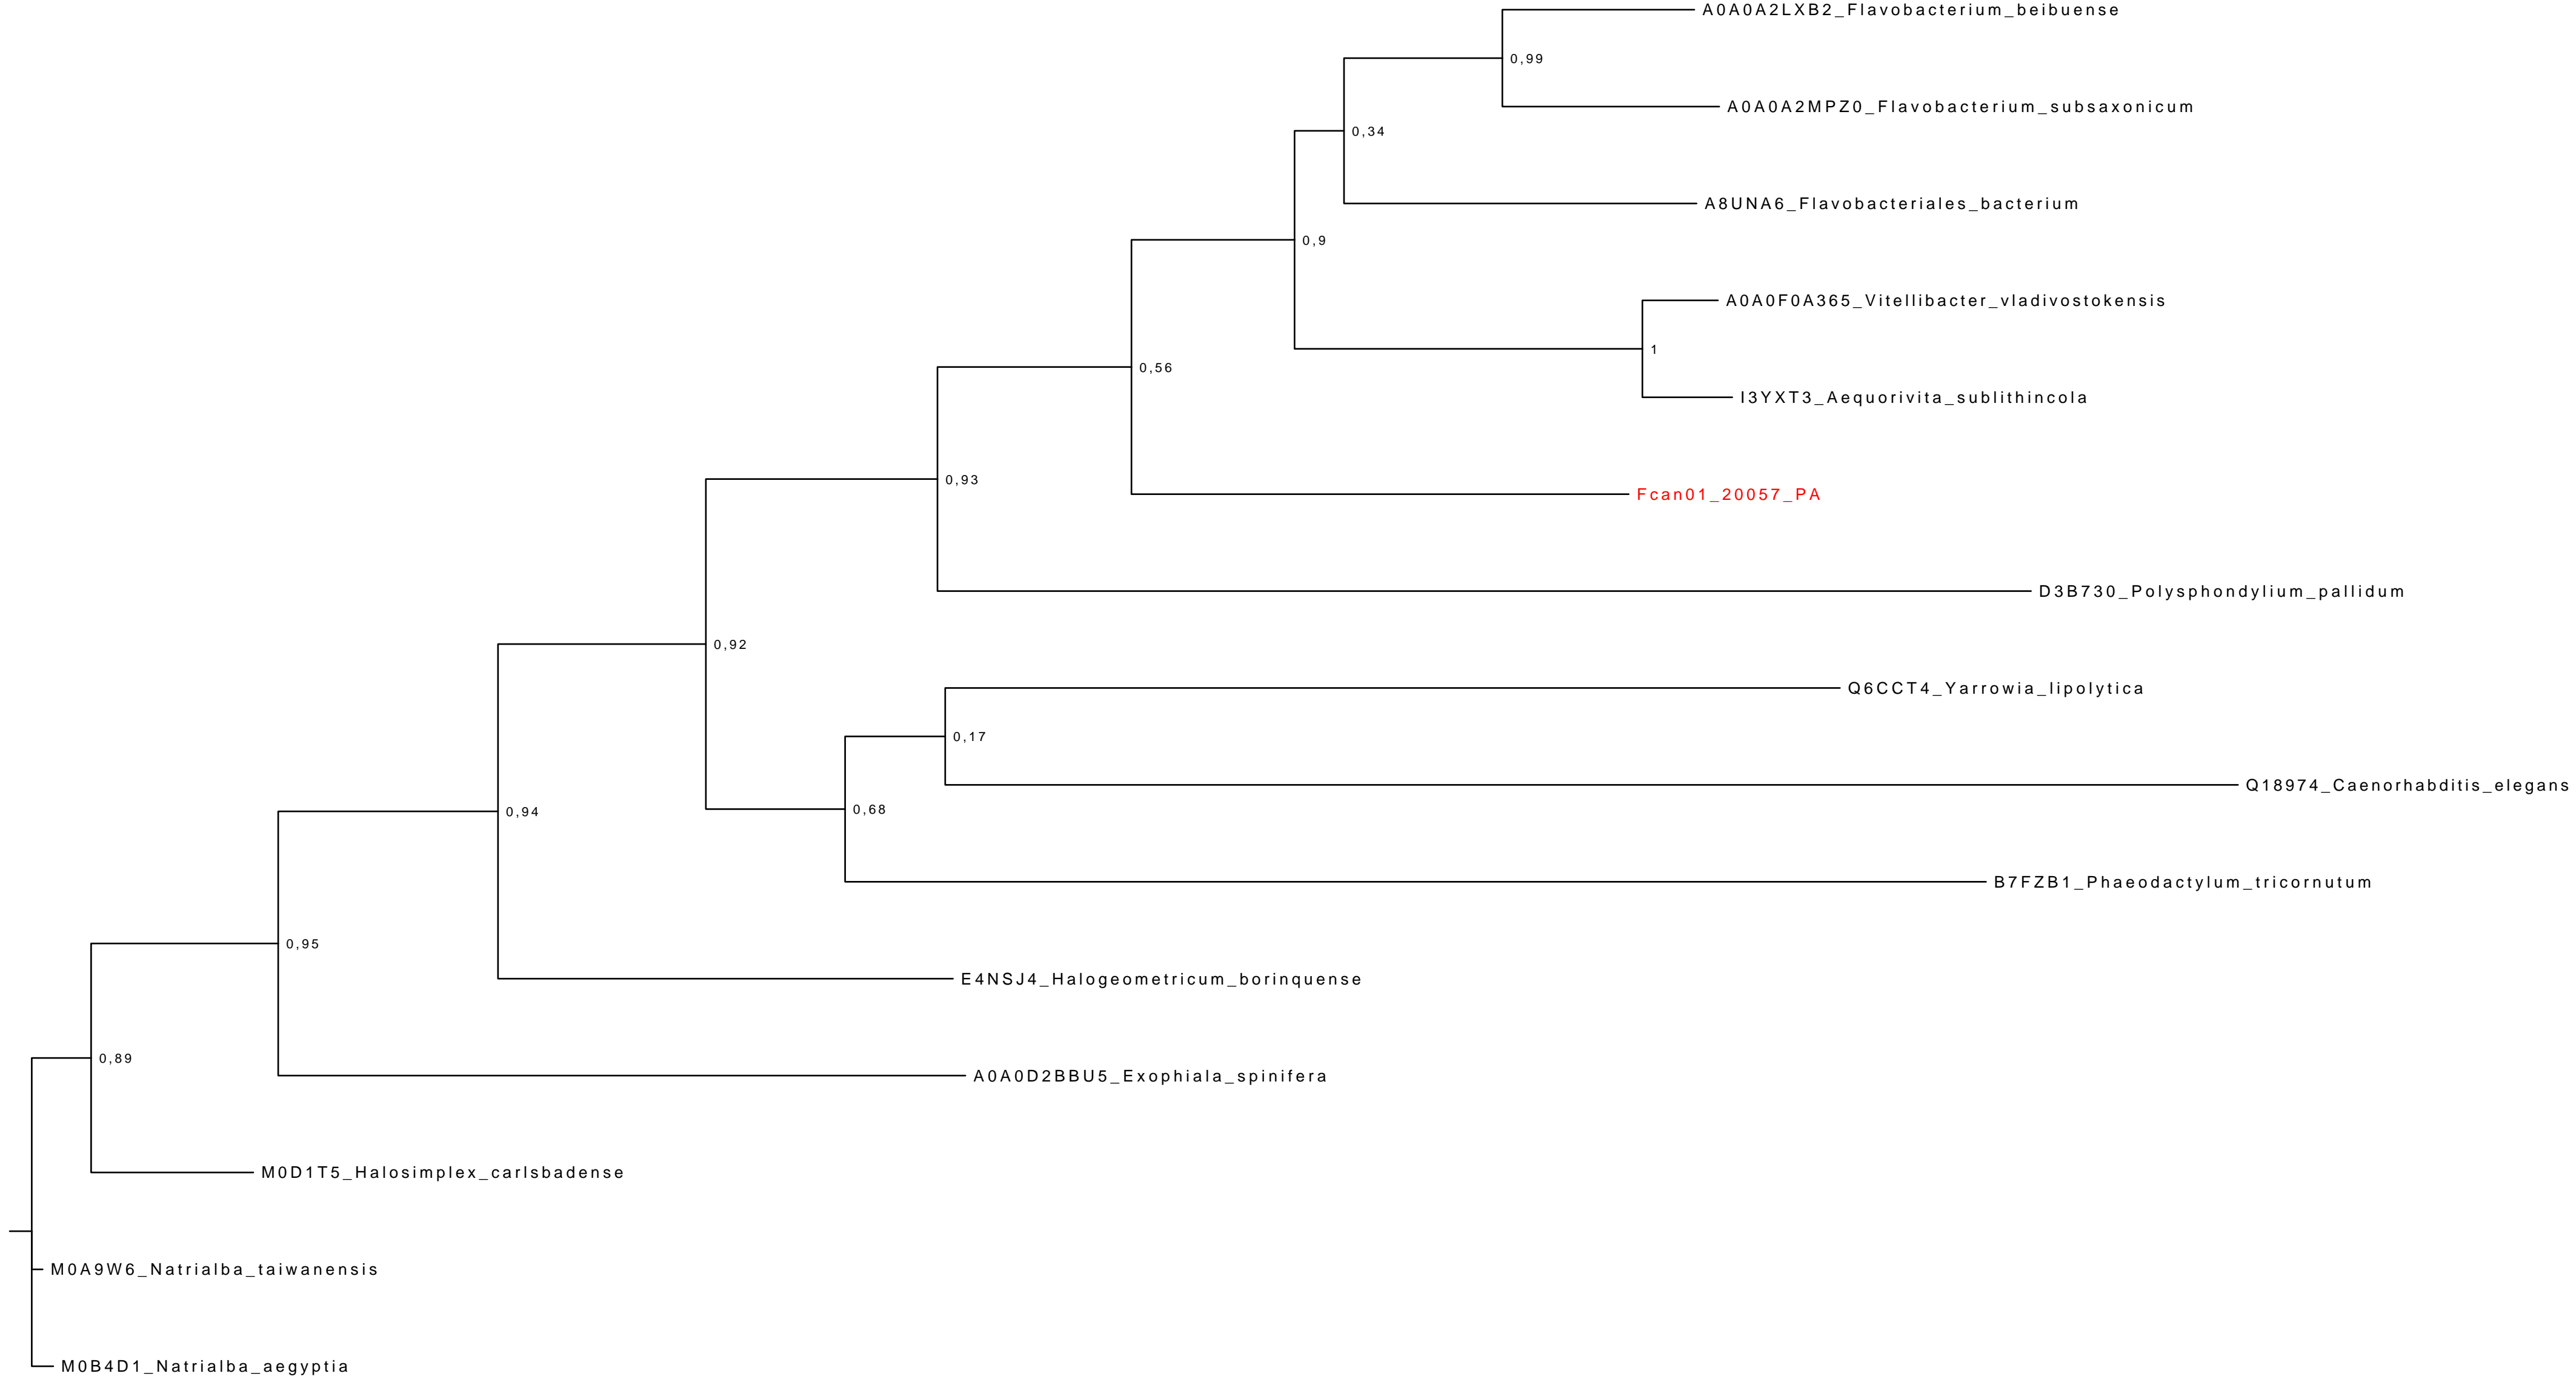

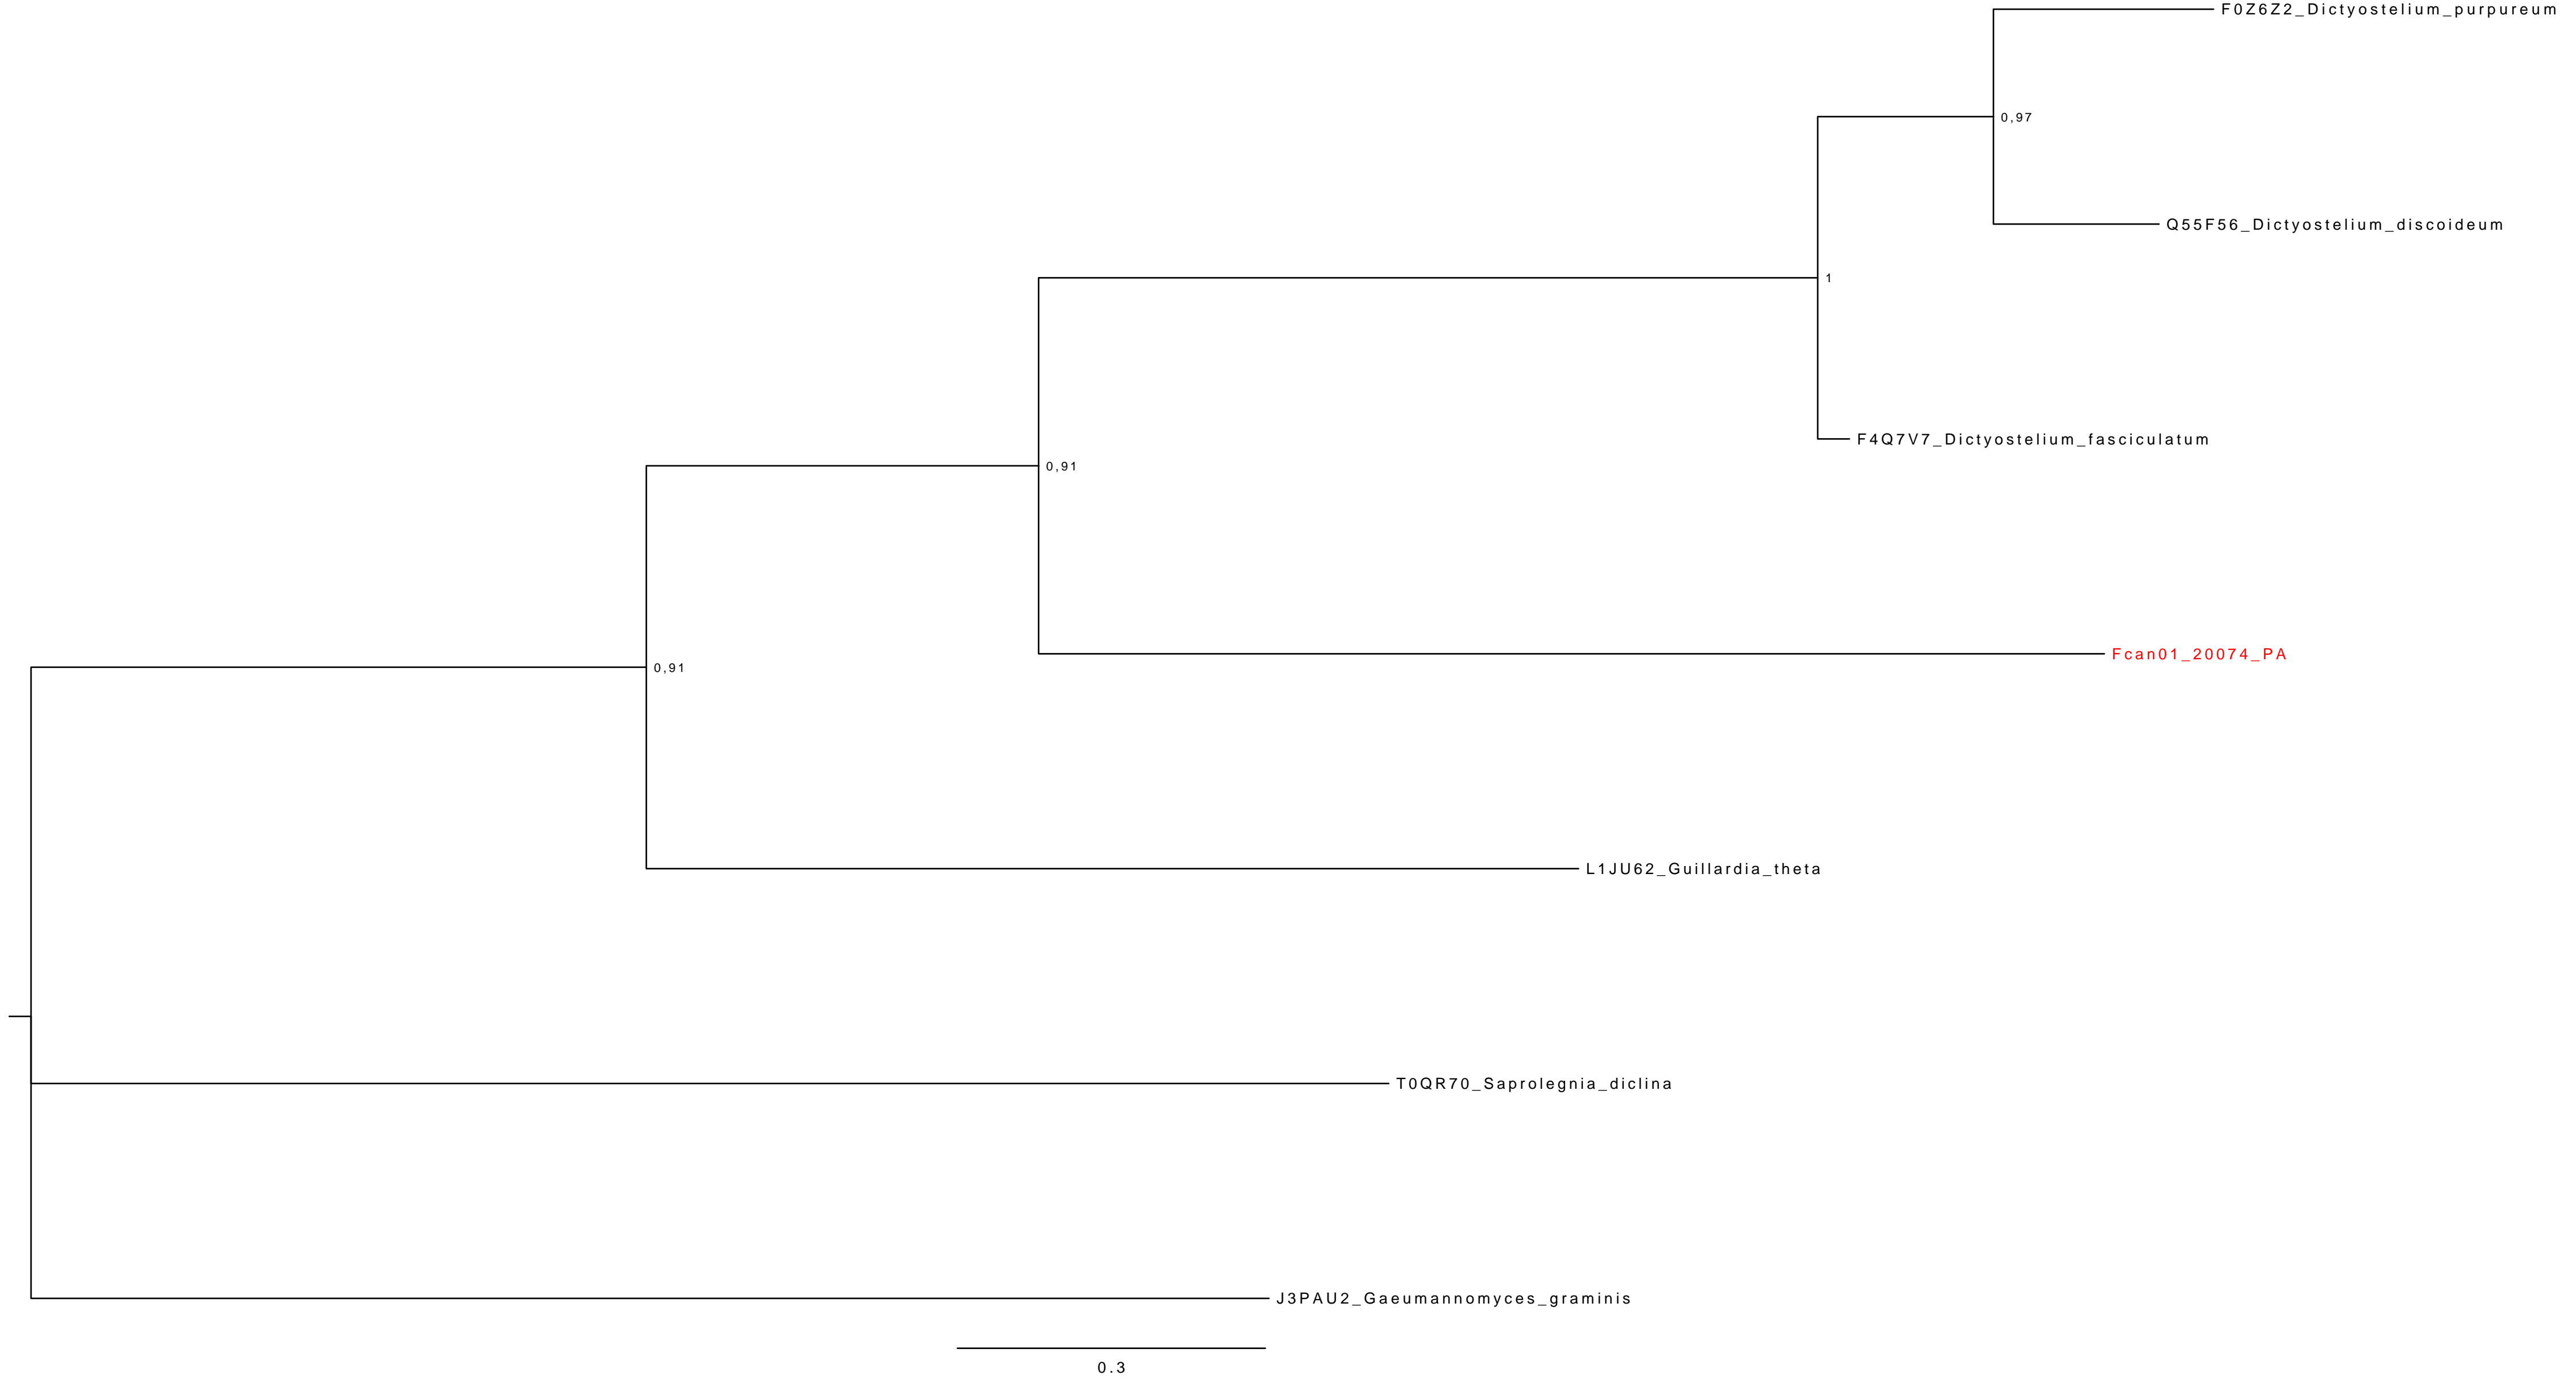



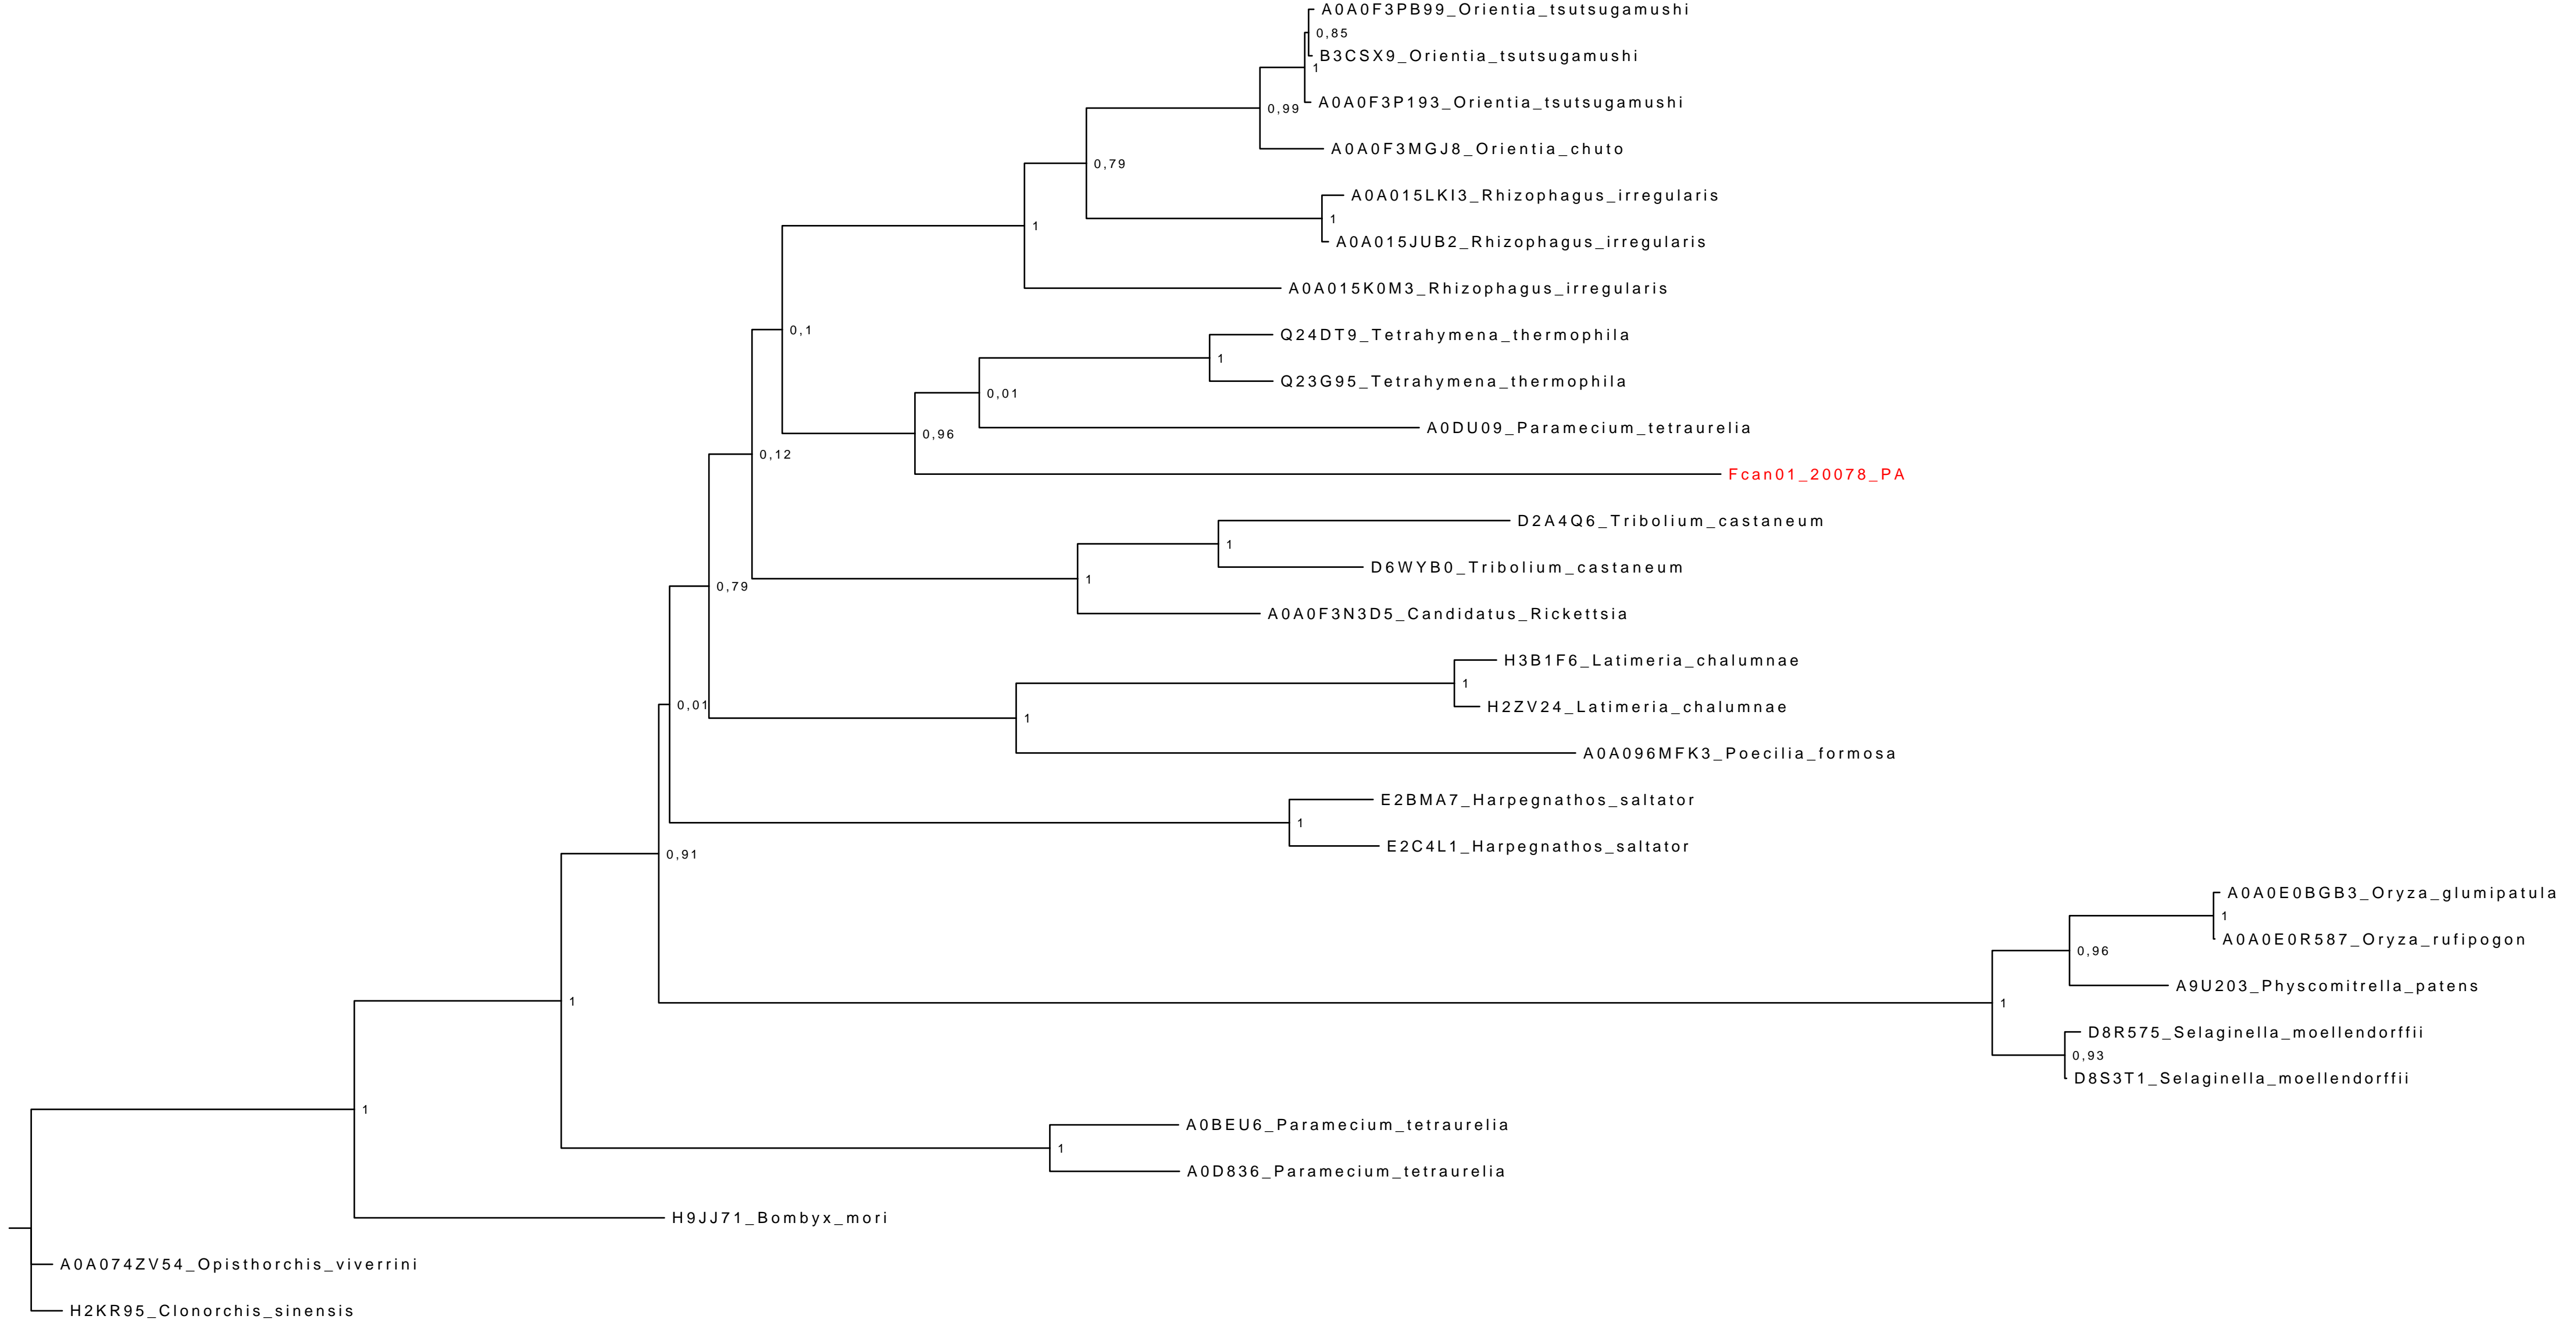

0.6

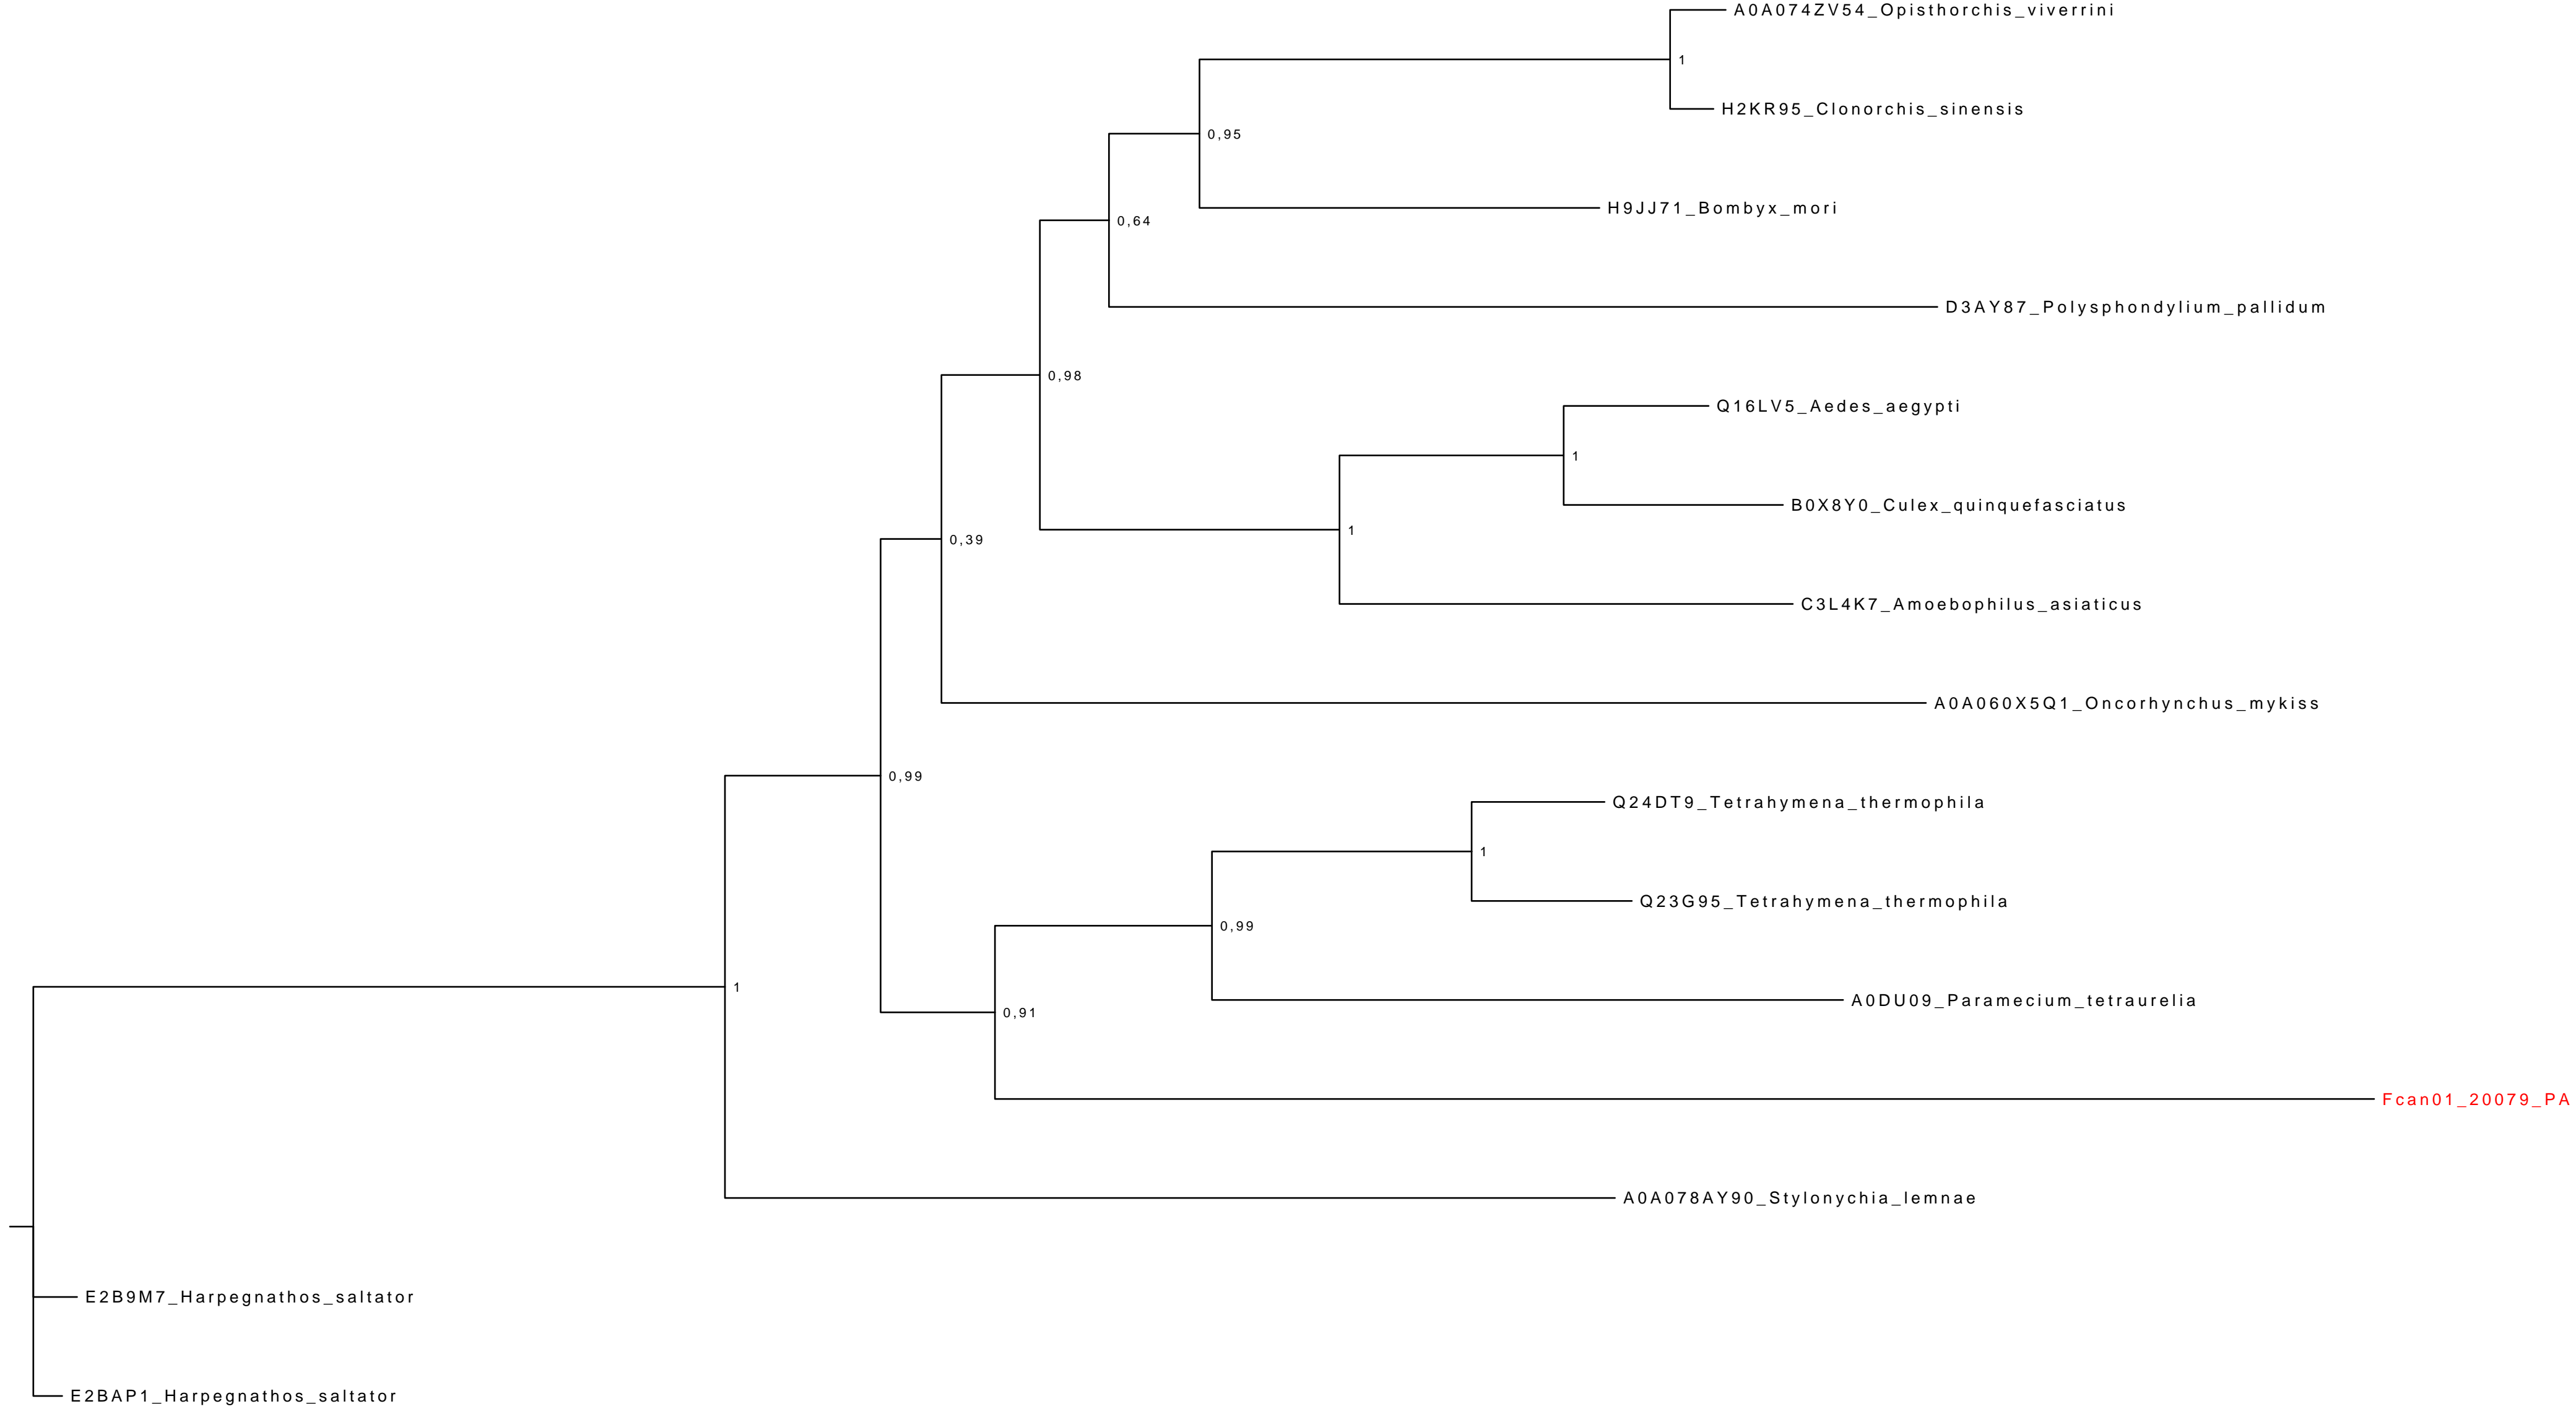

0.6

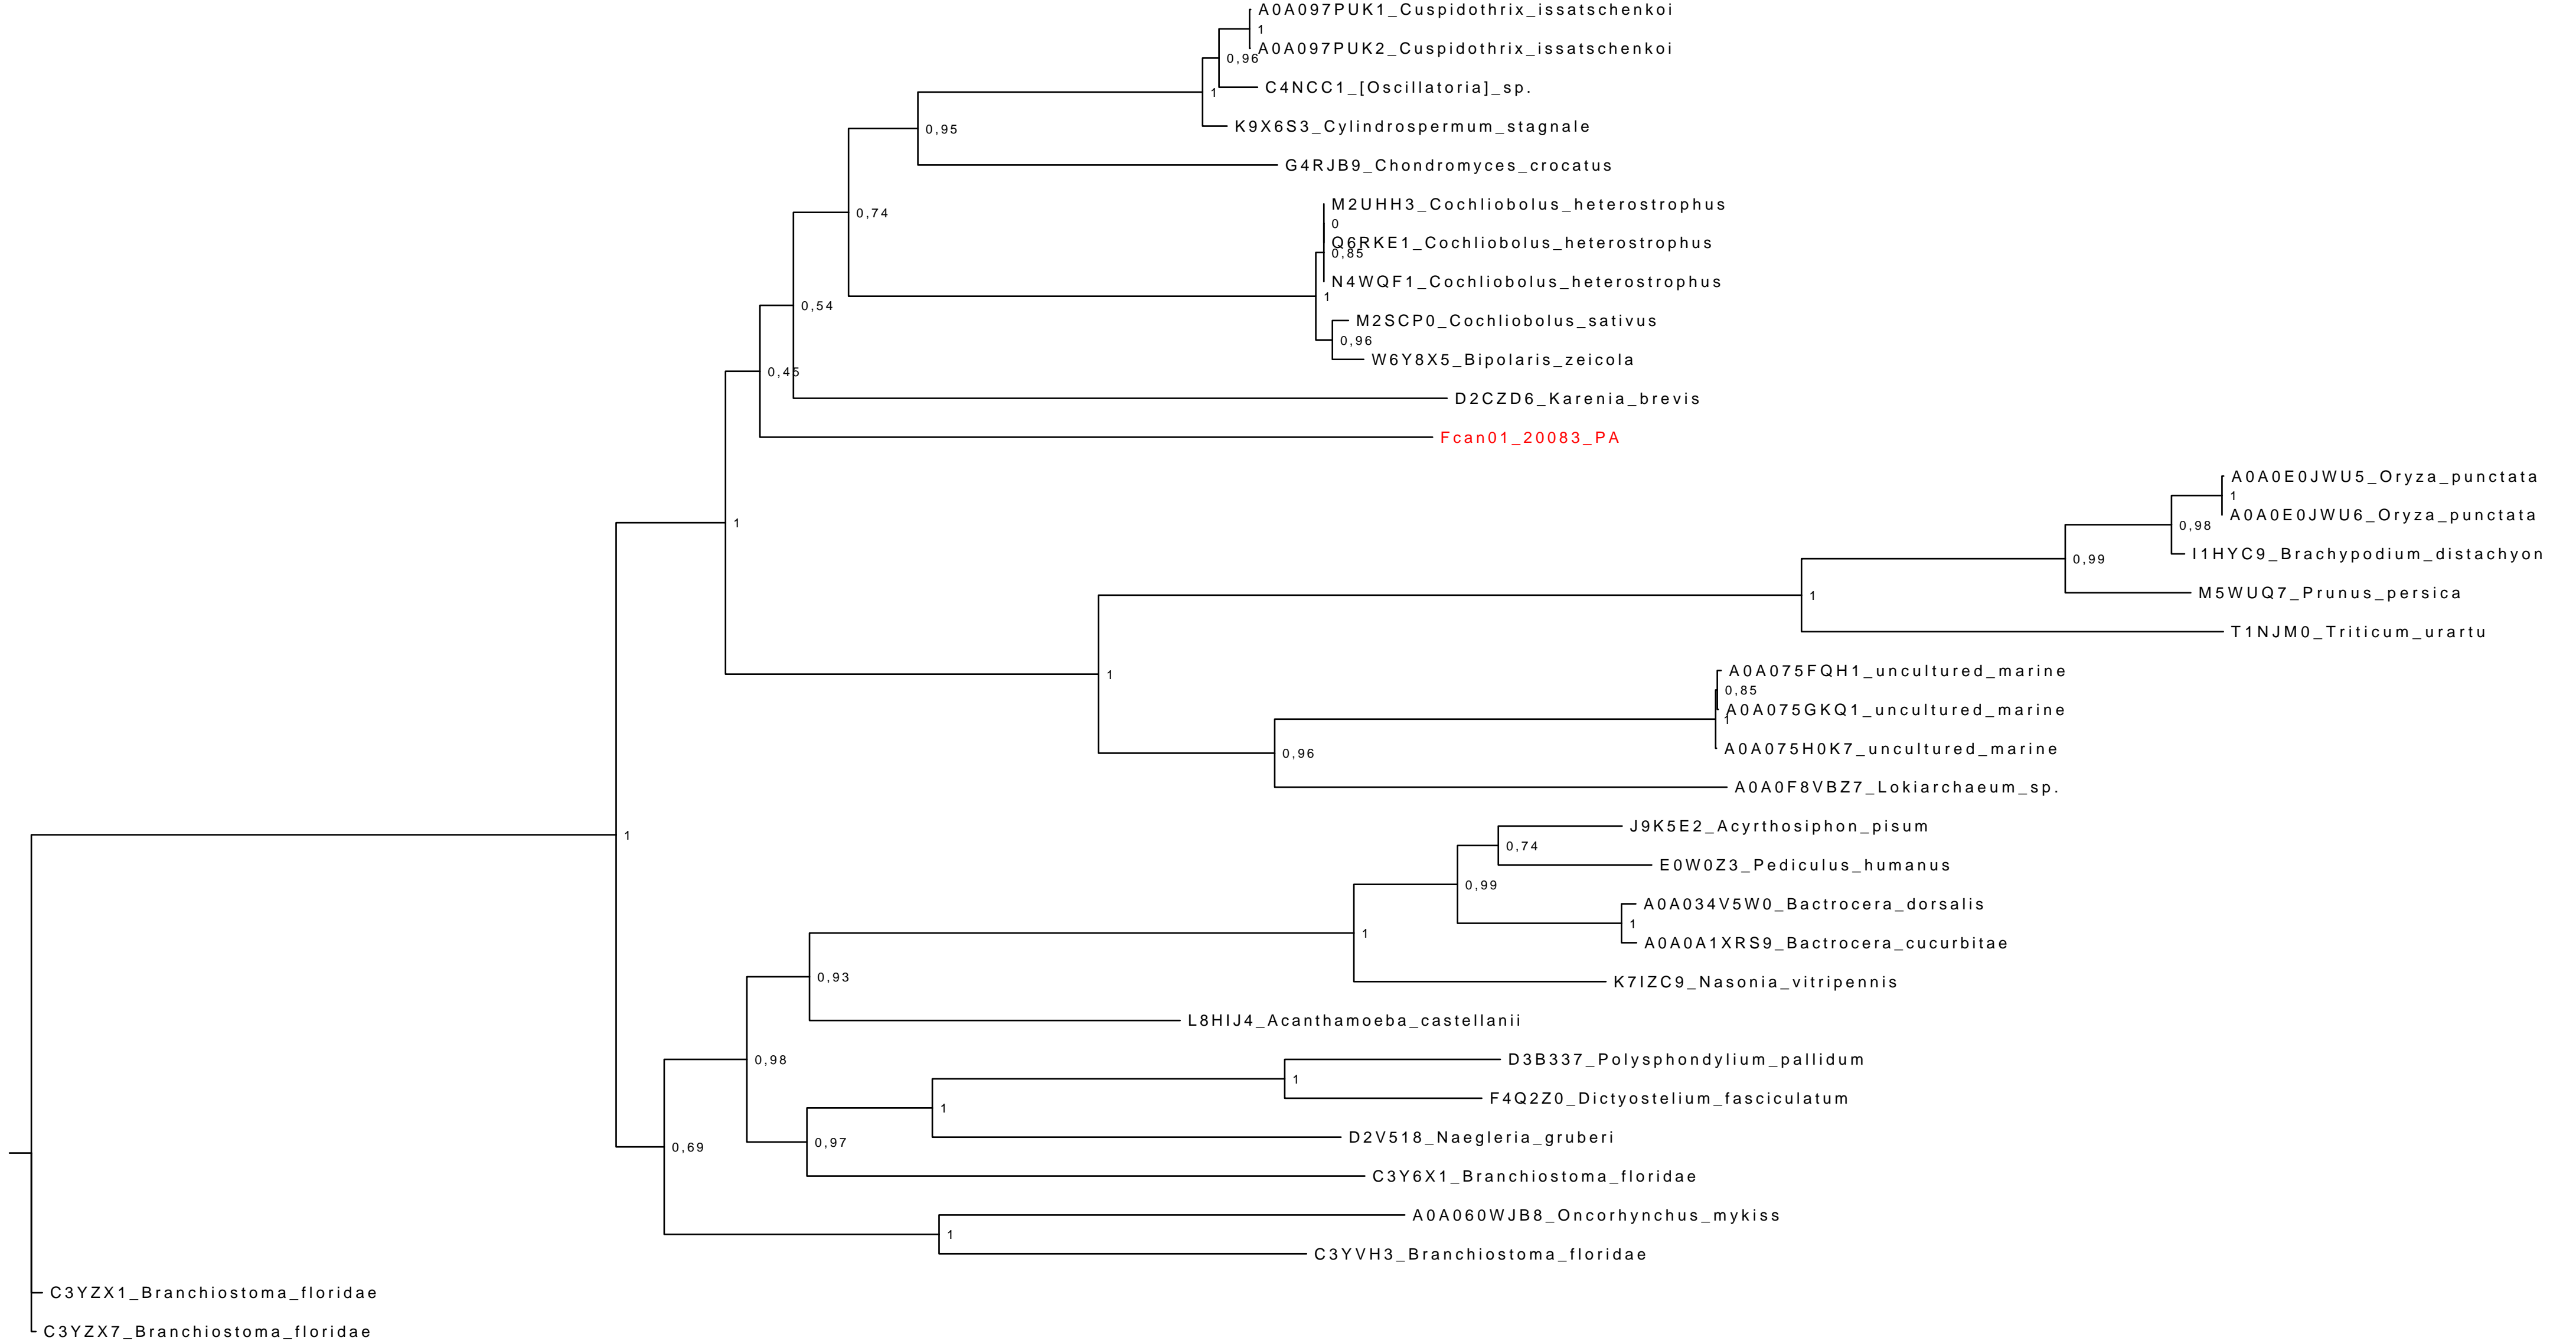

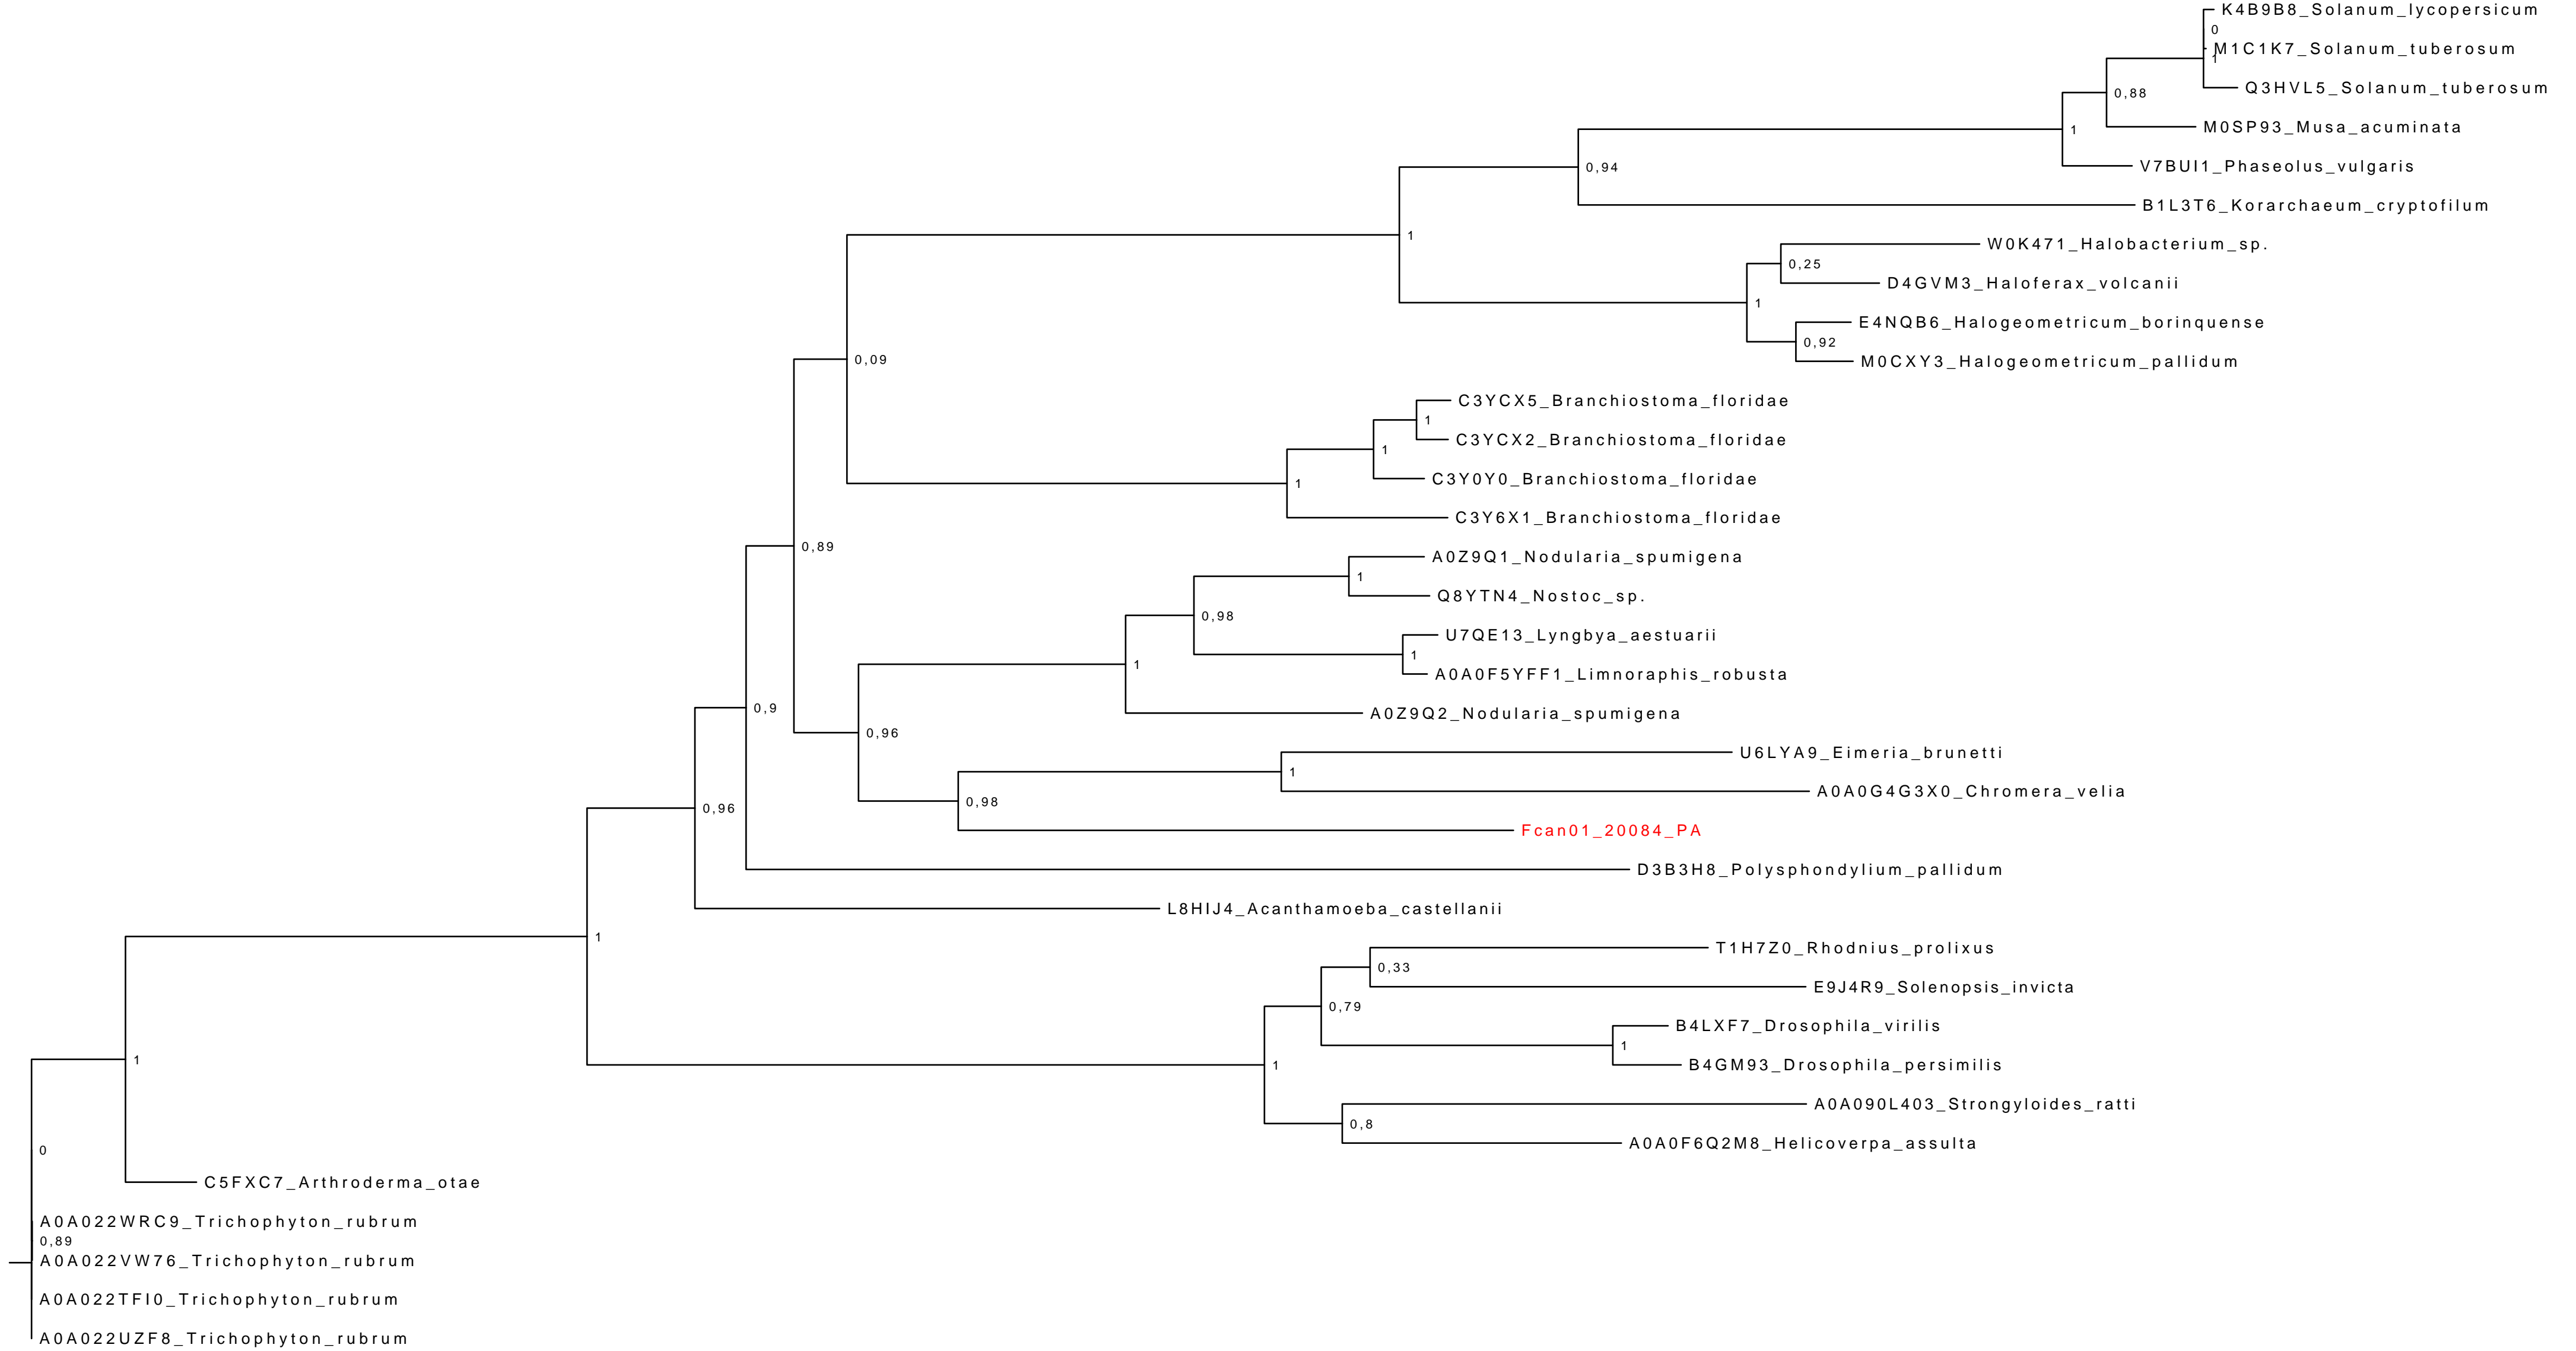

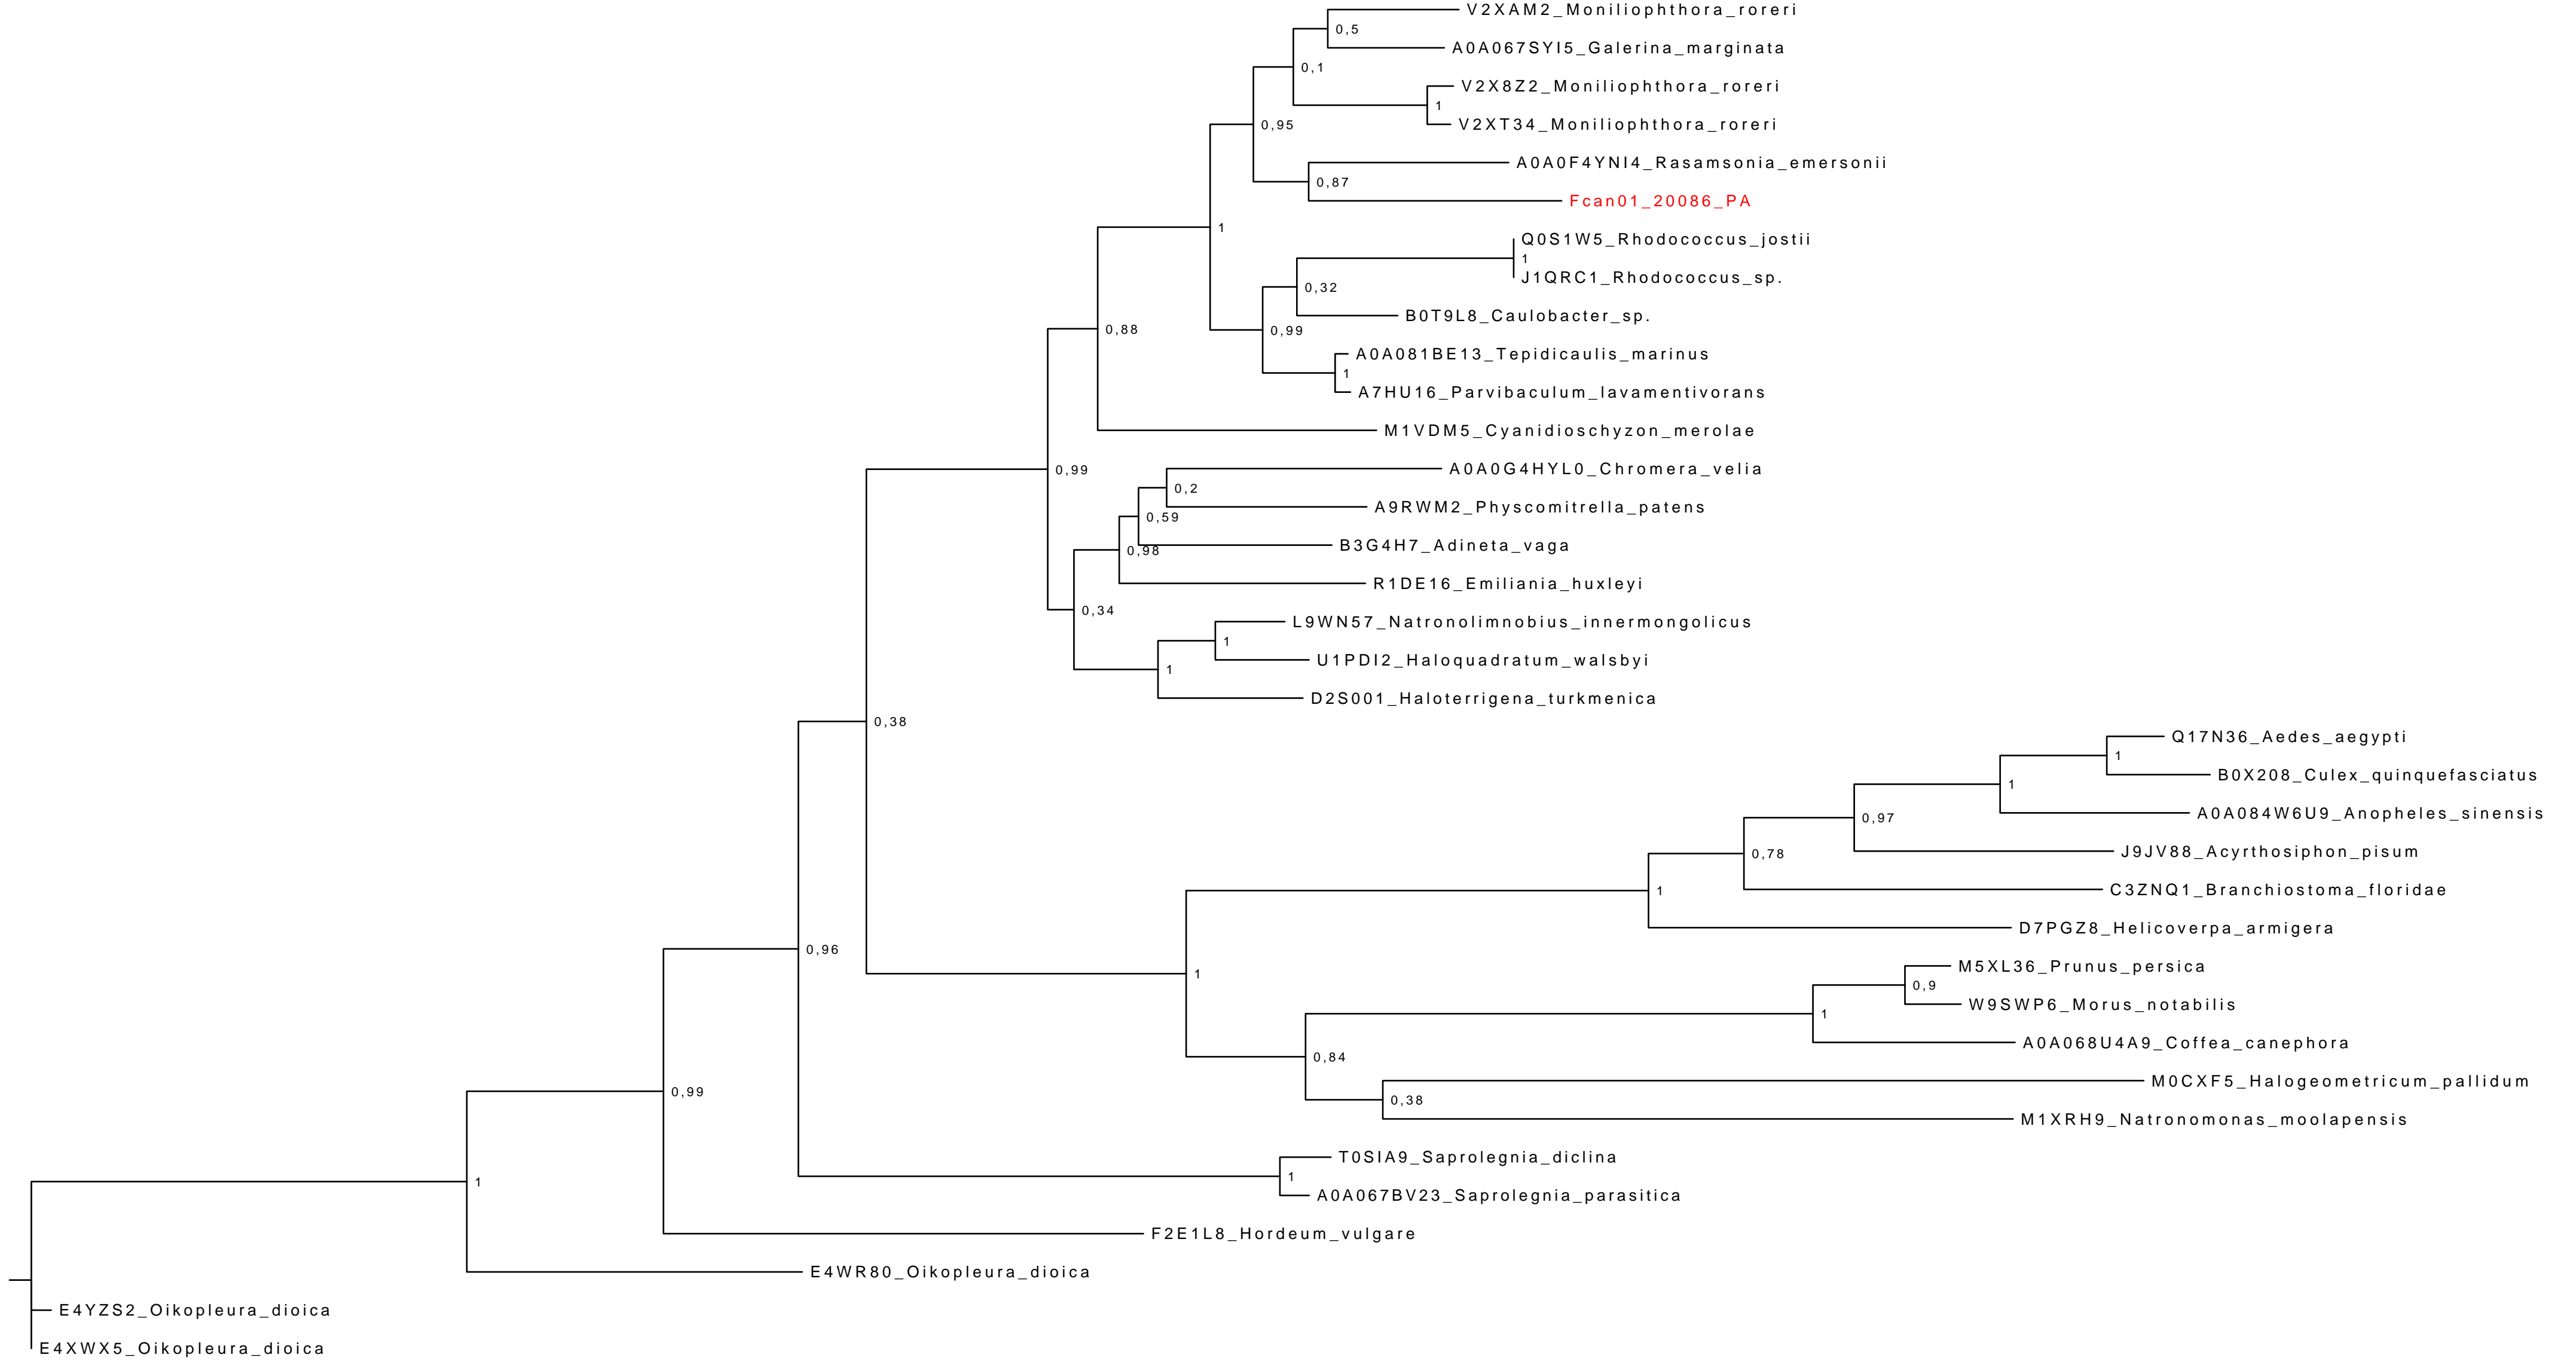

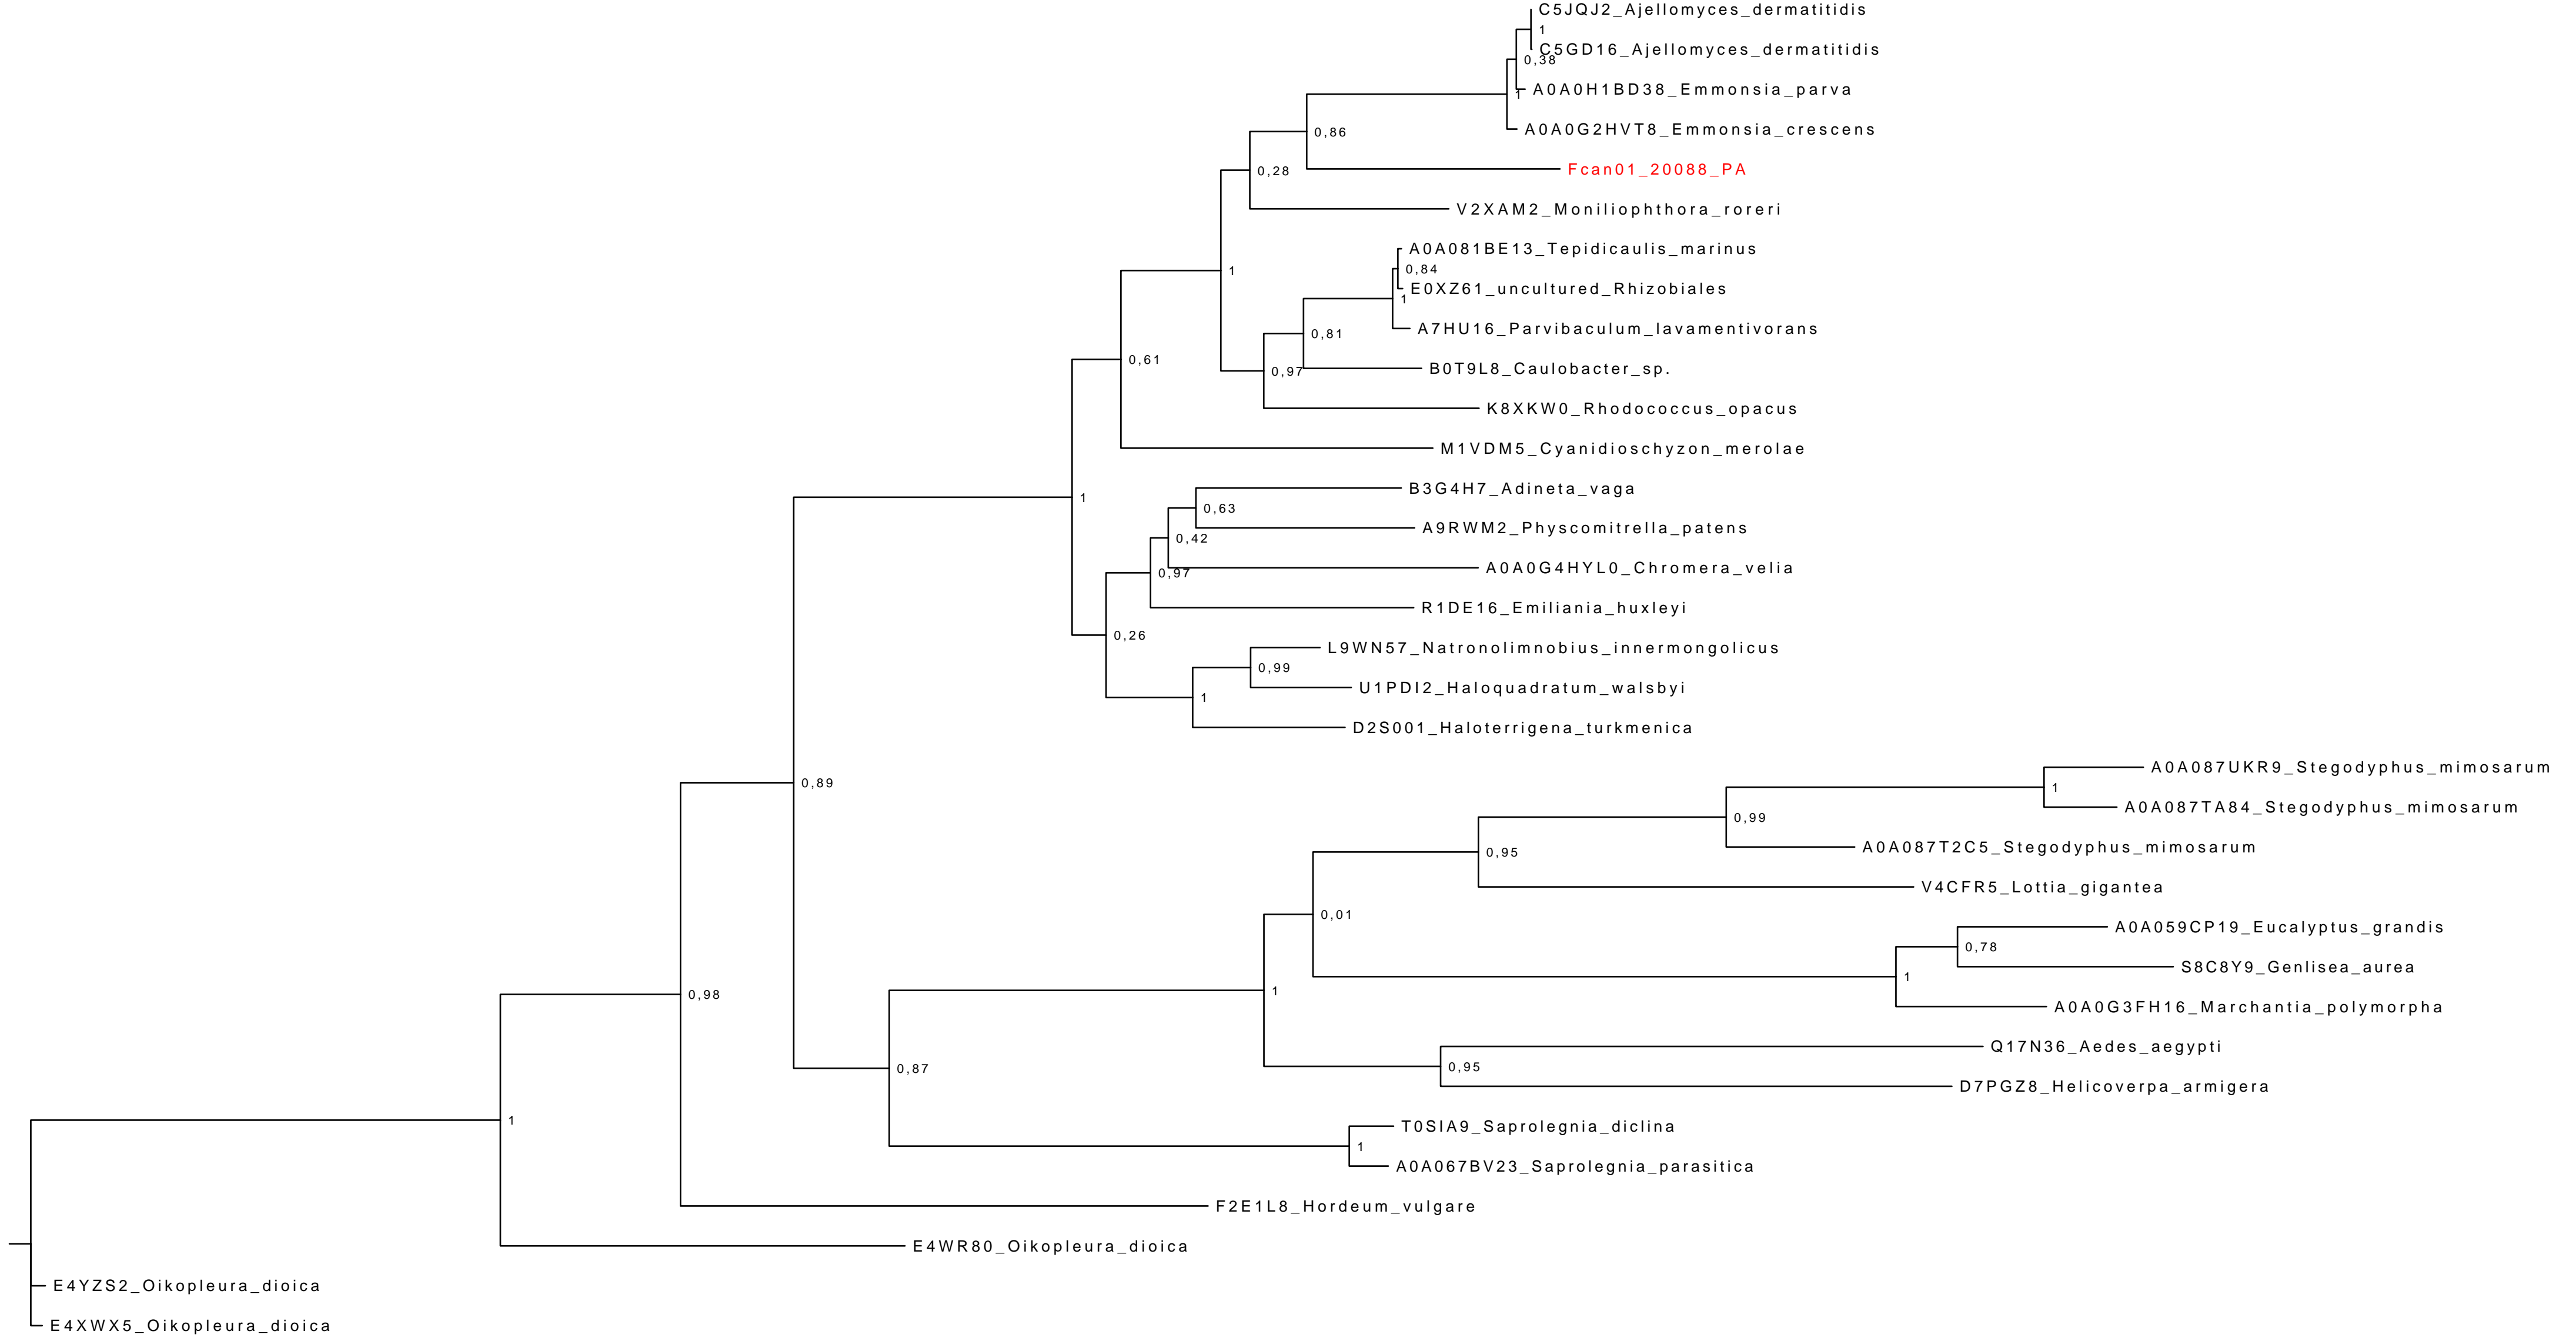

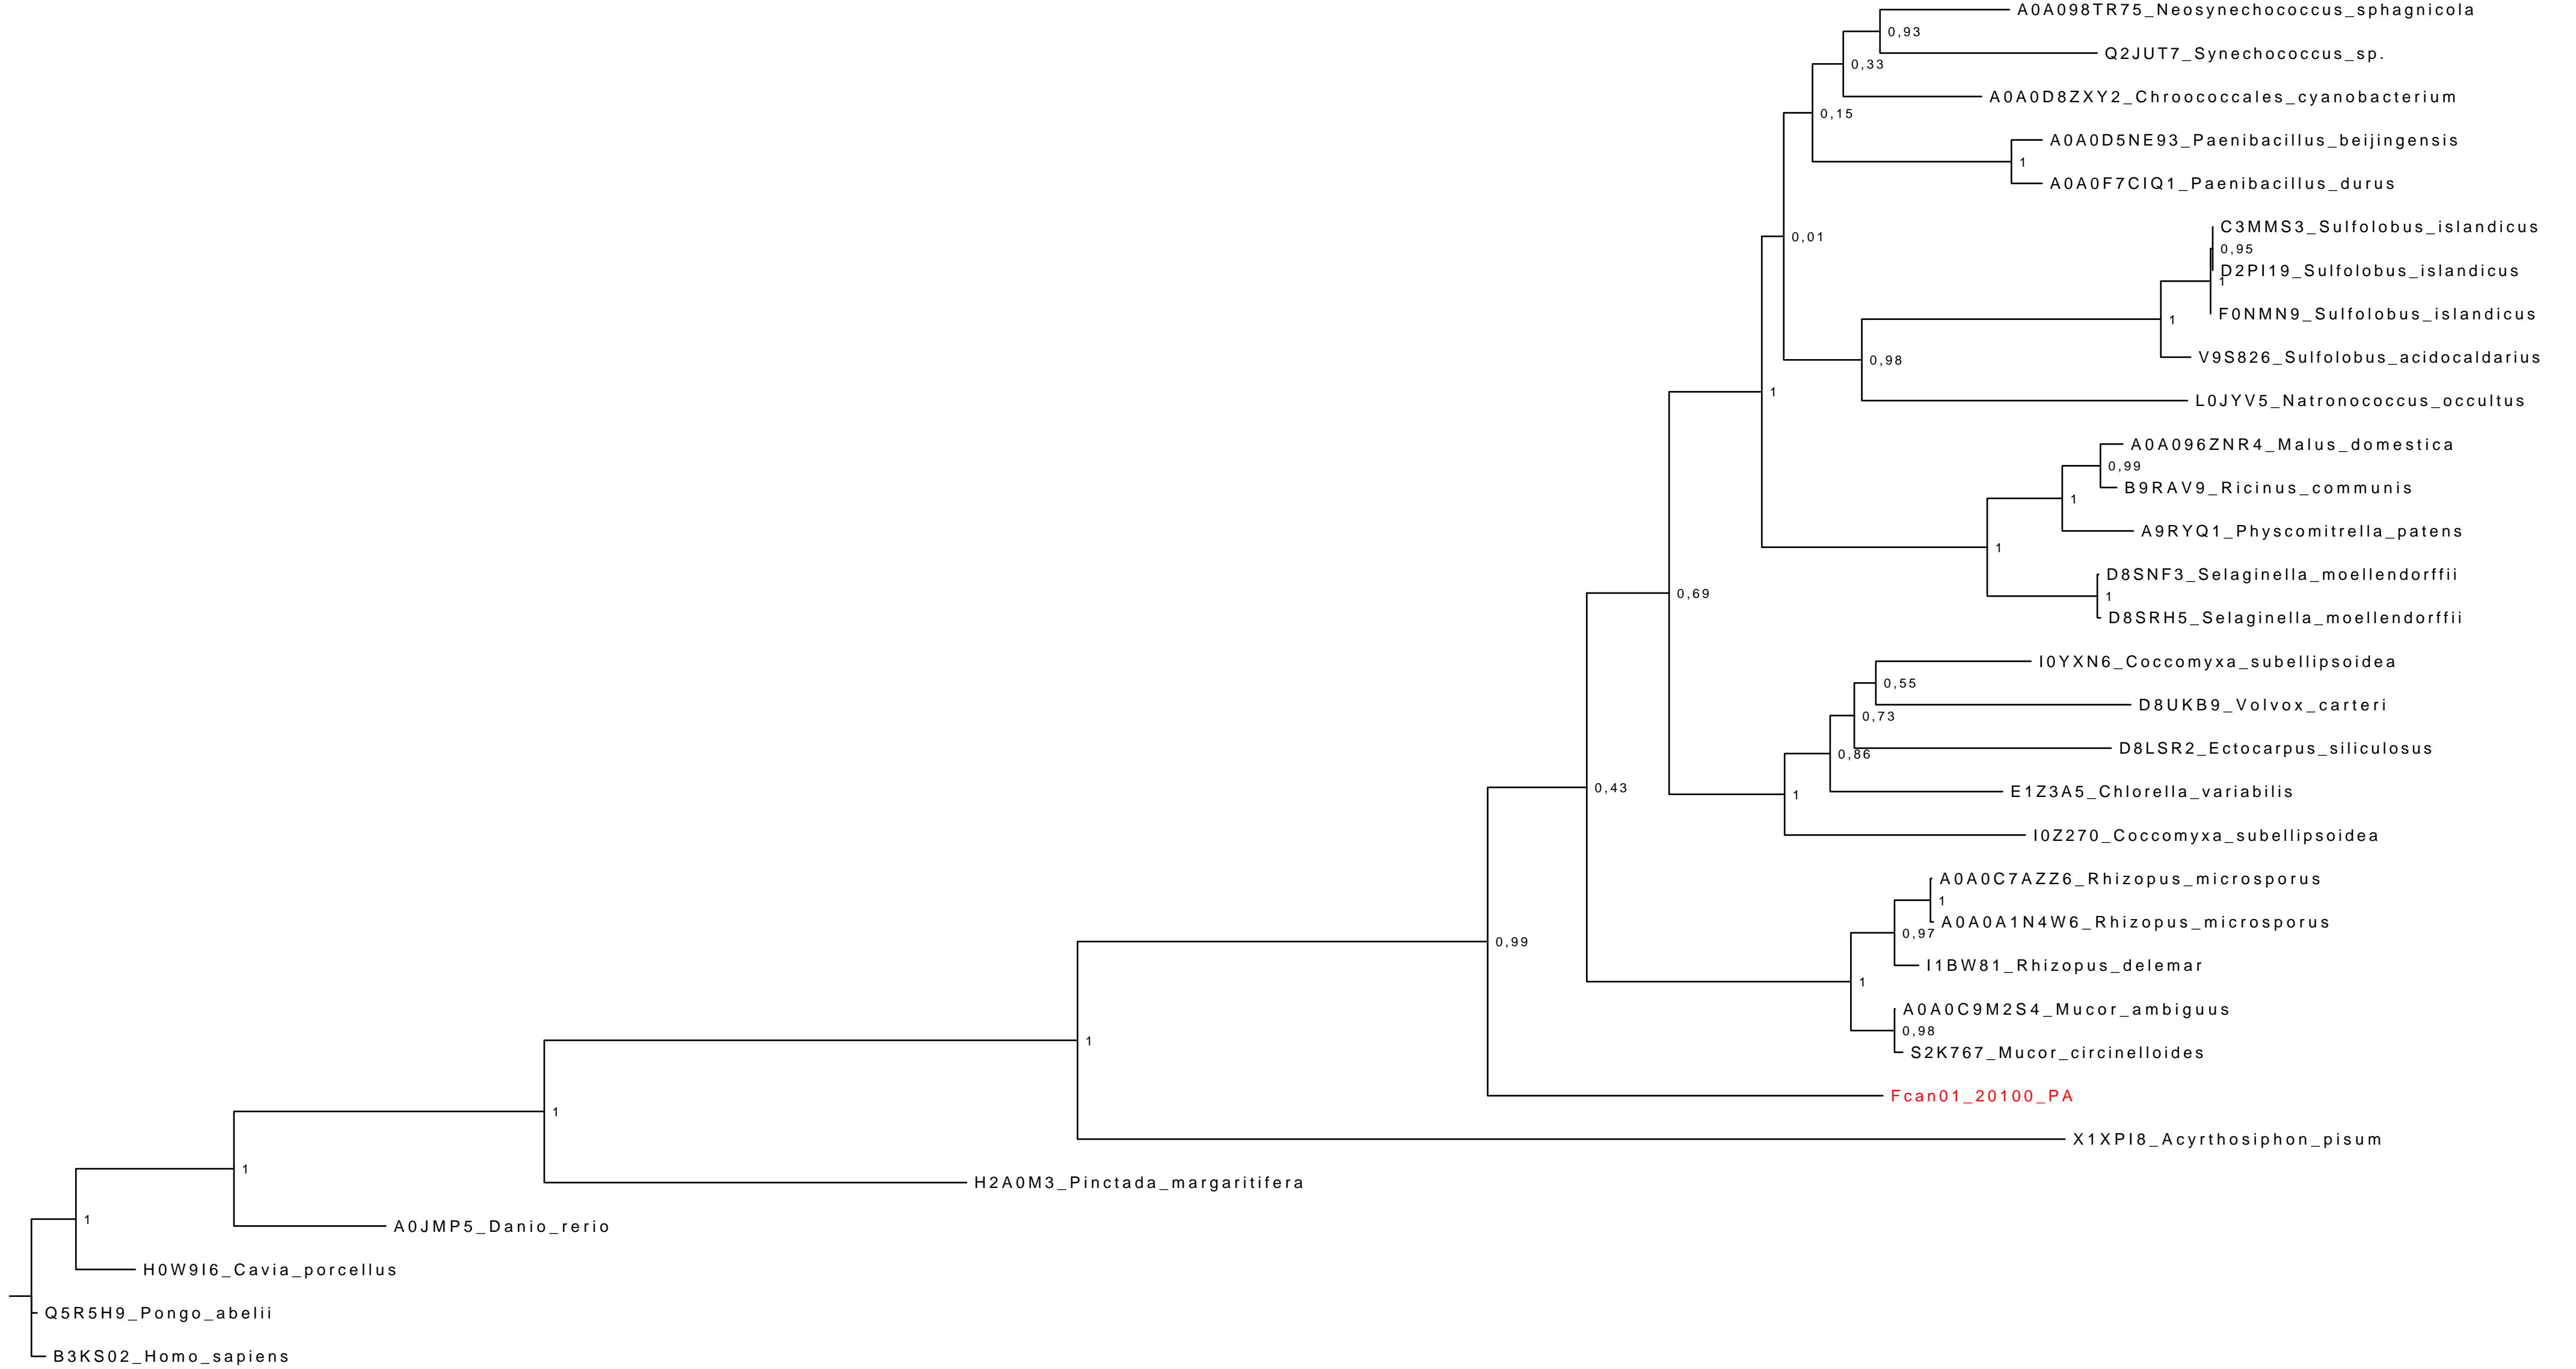

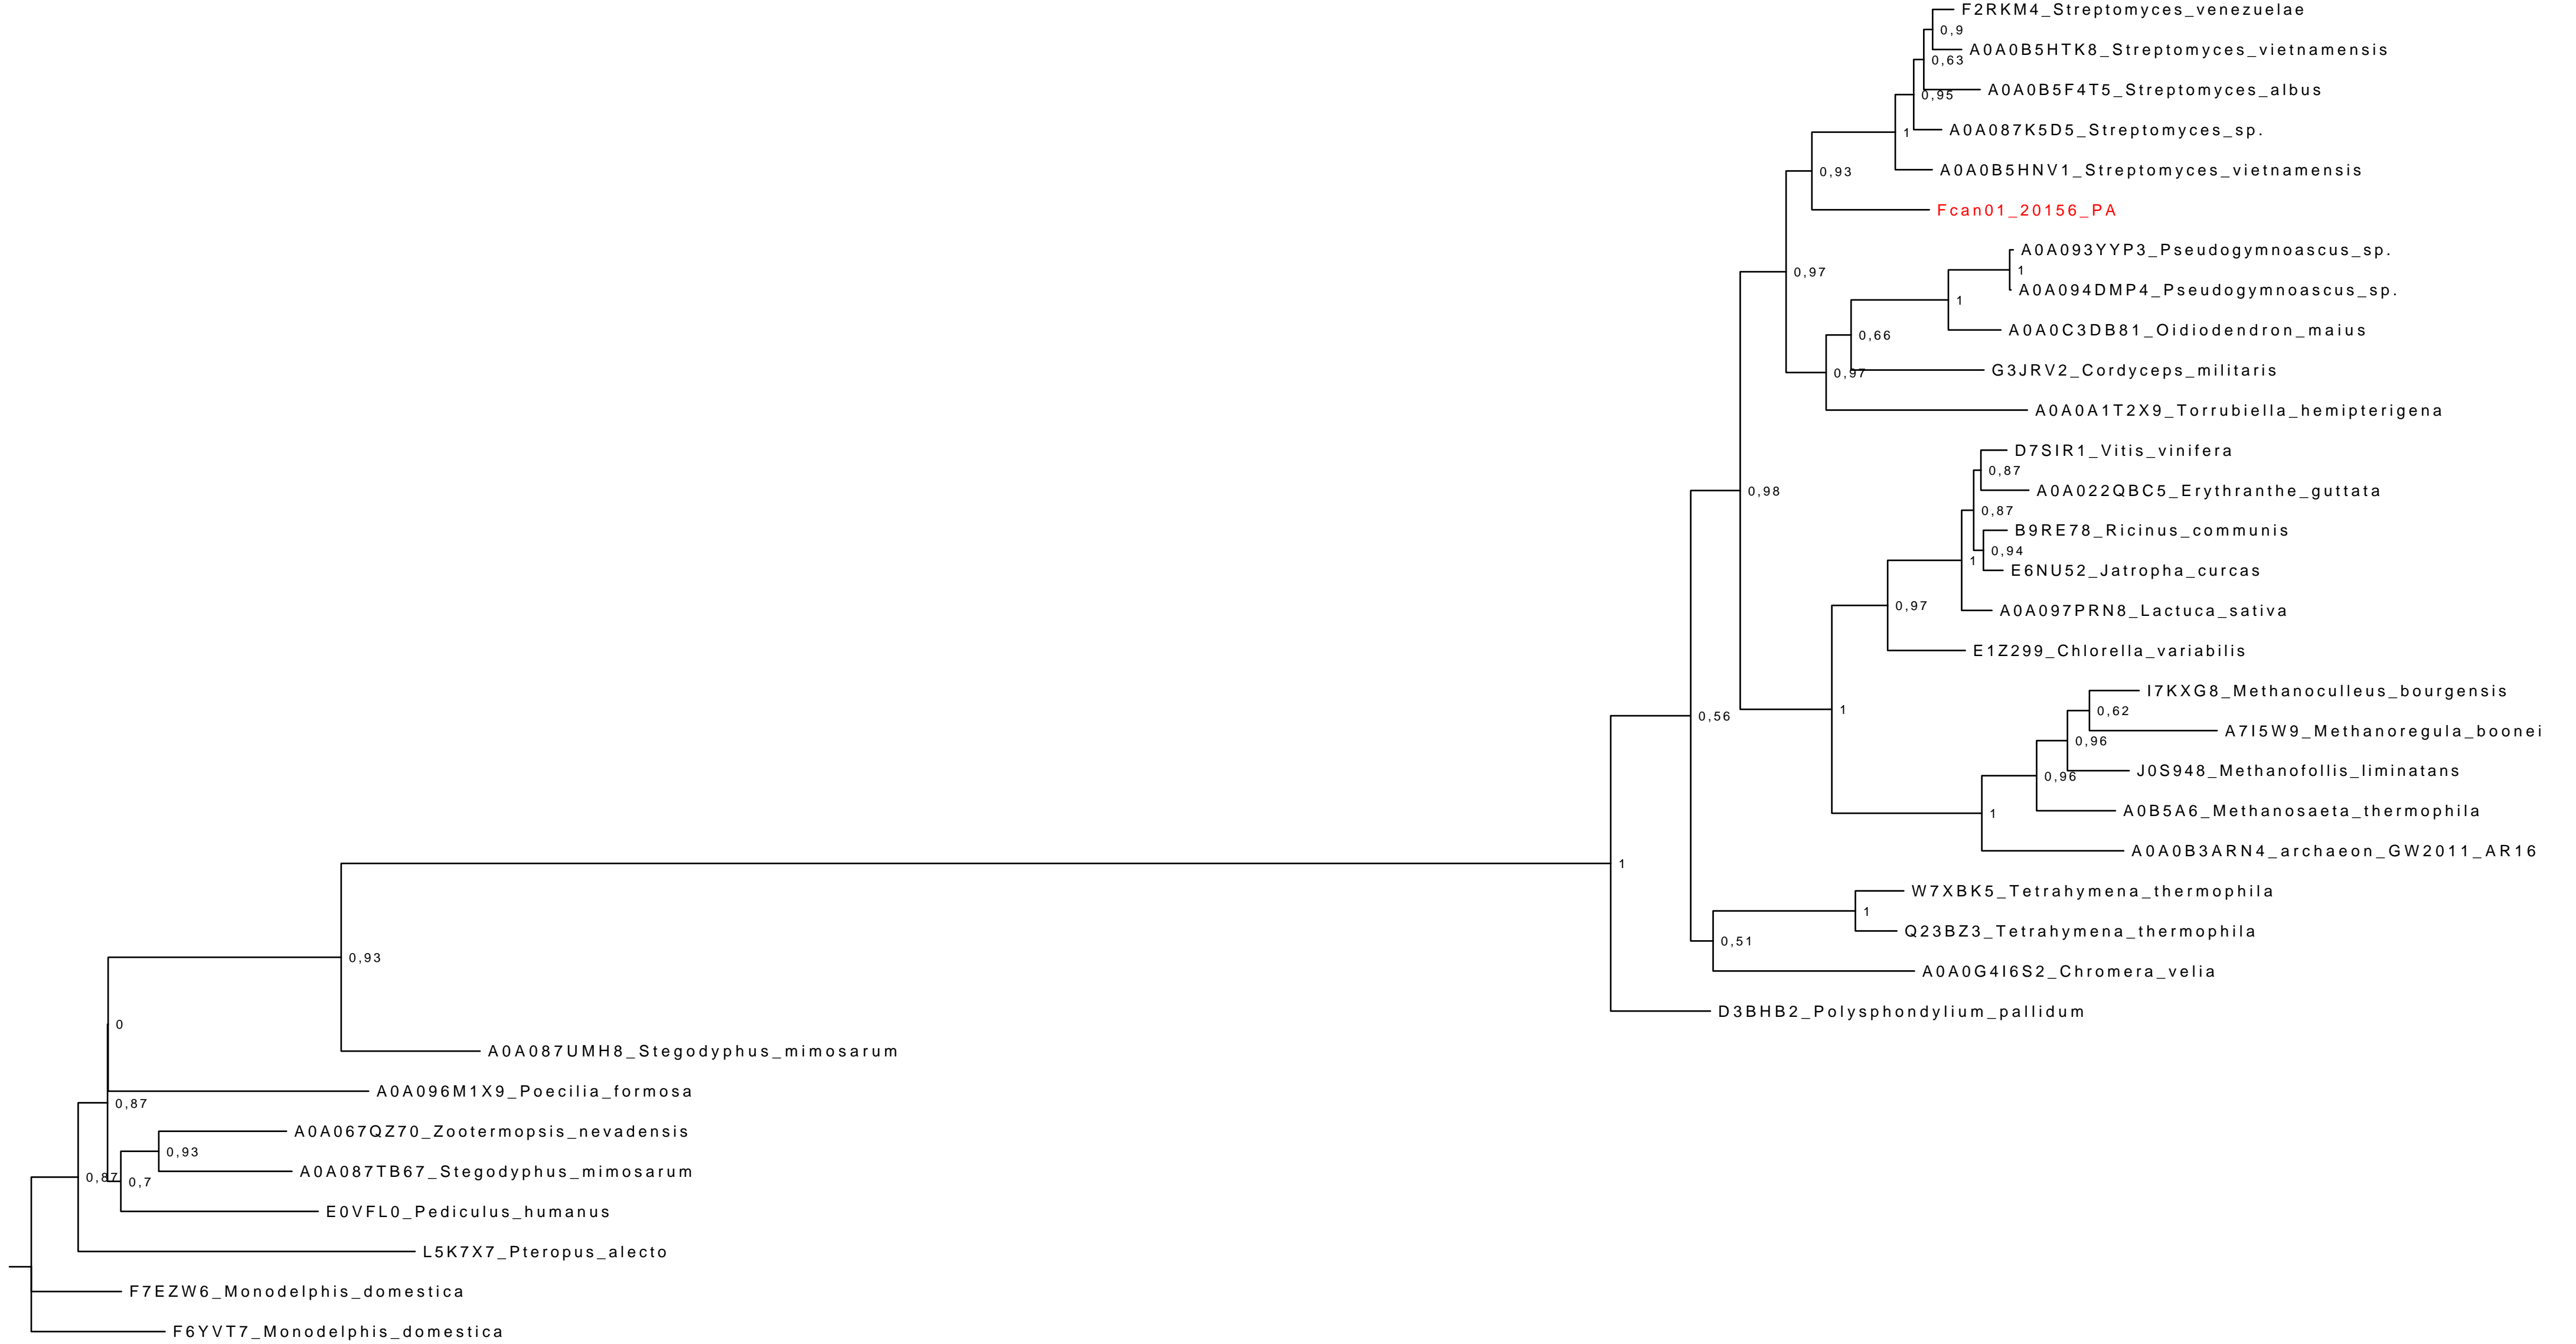



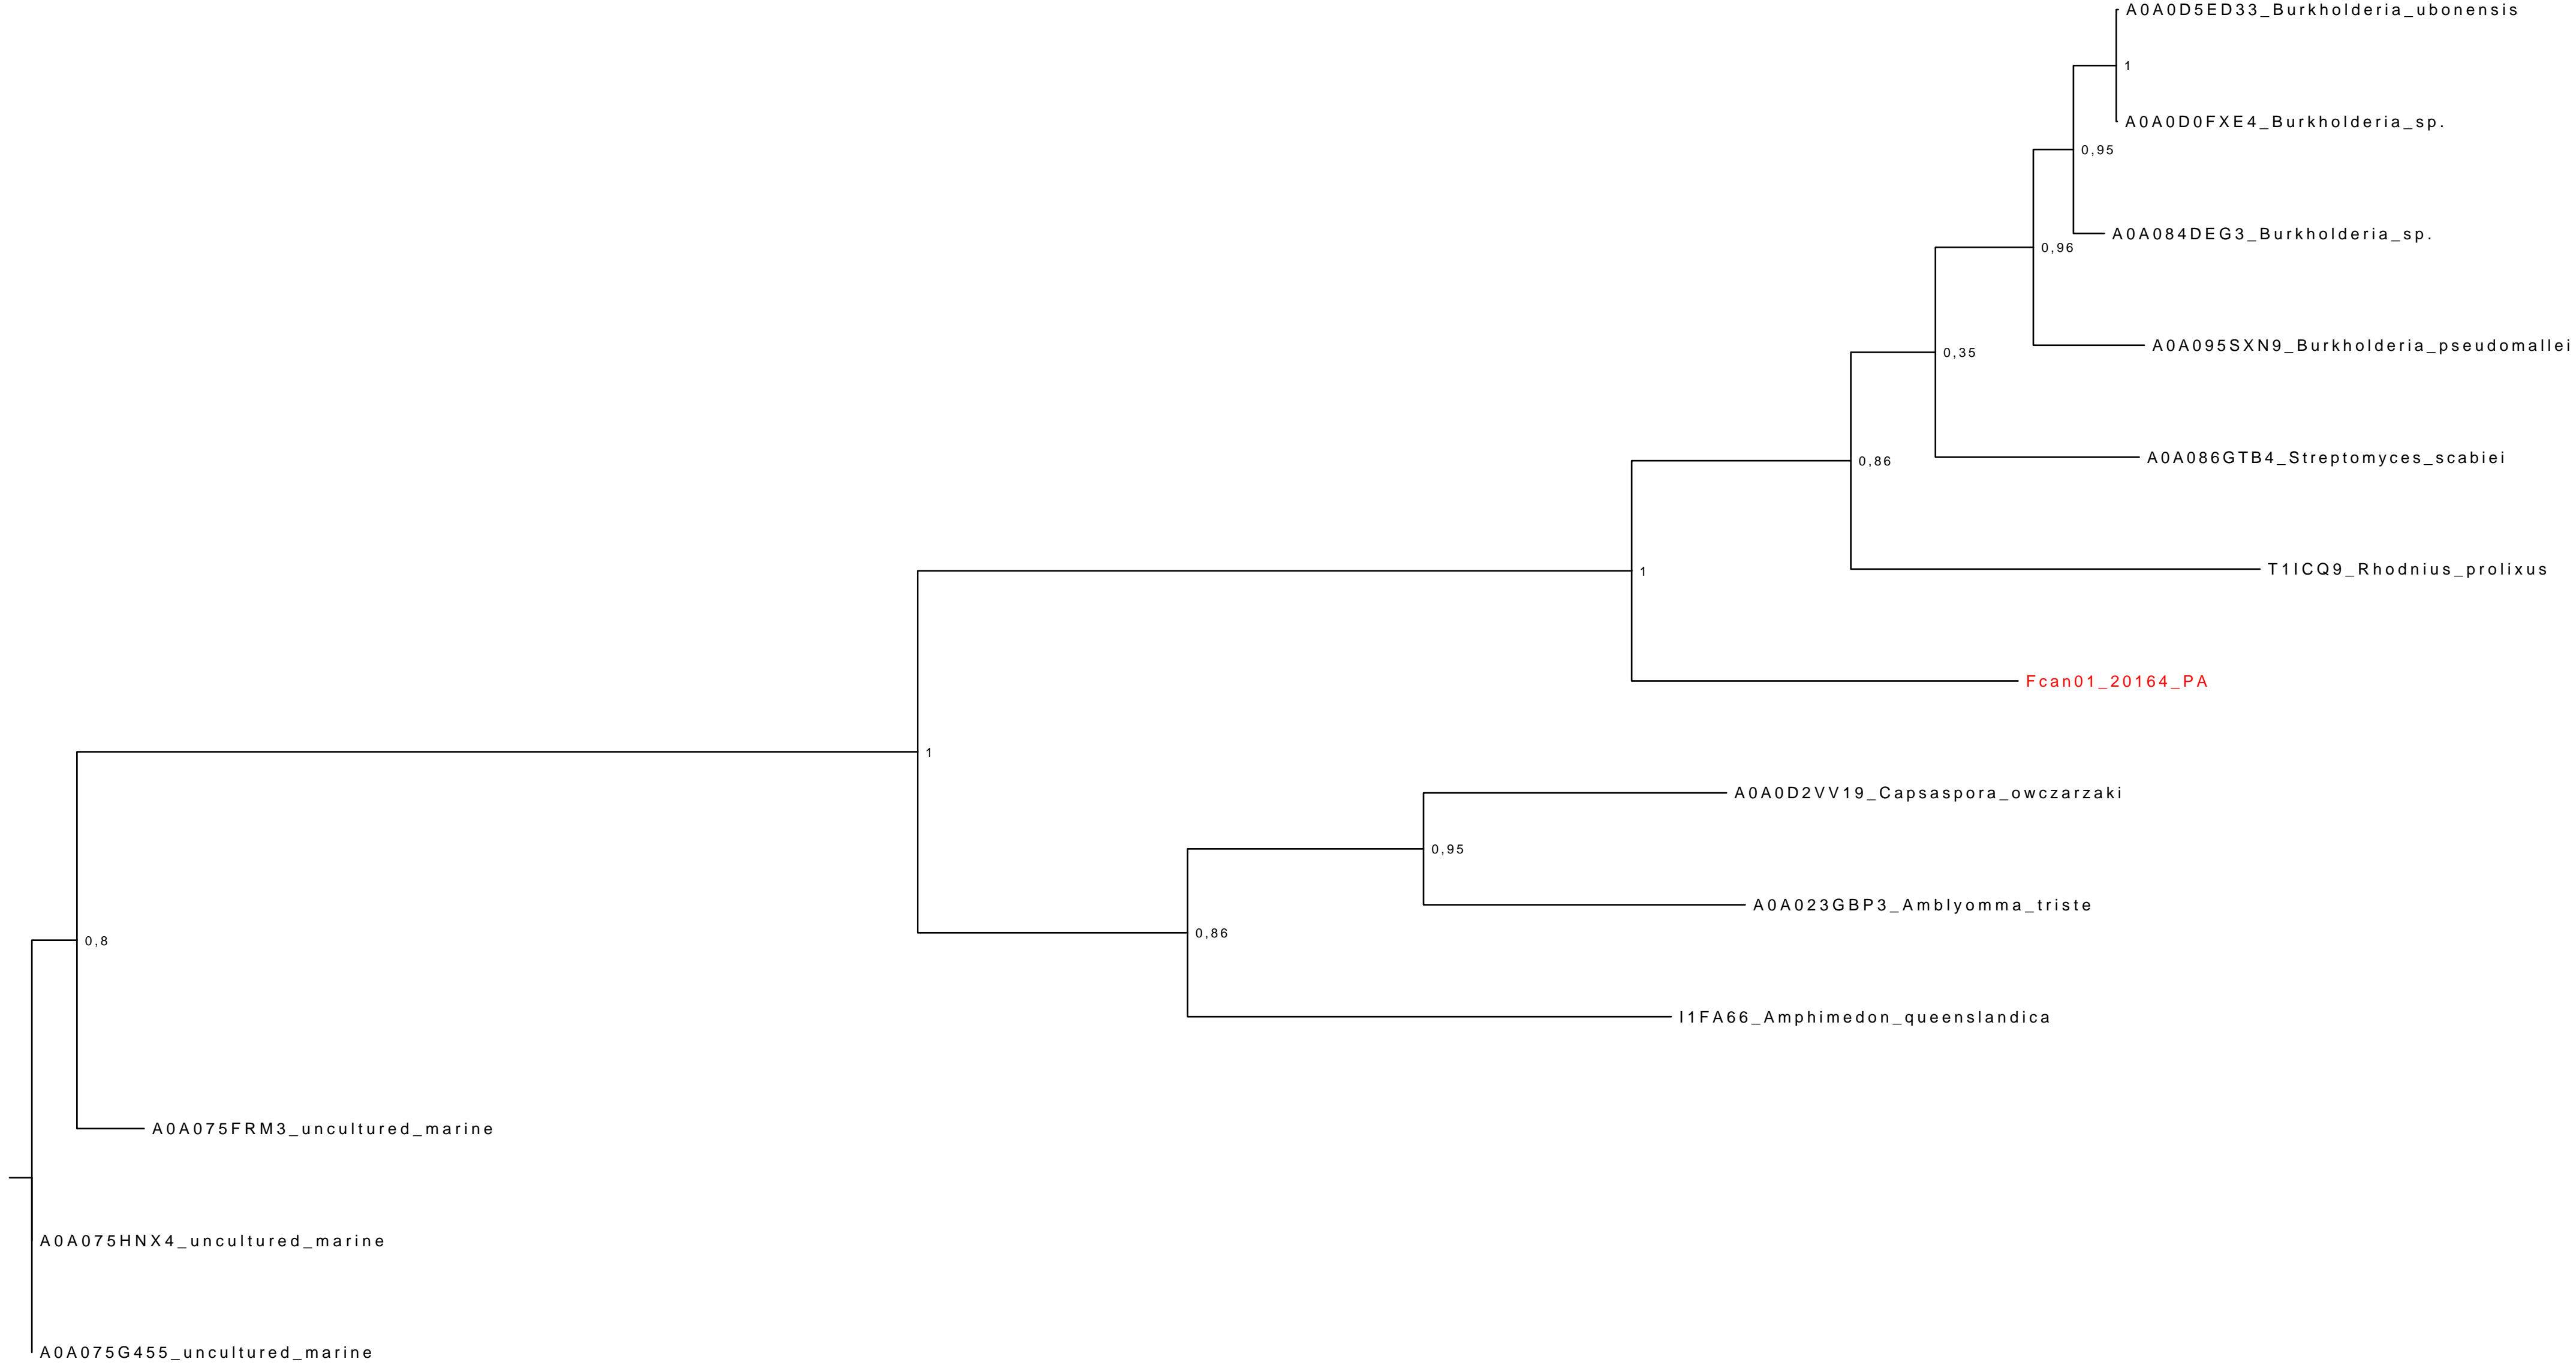

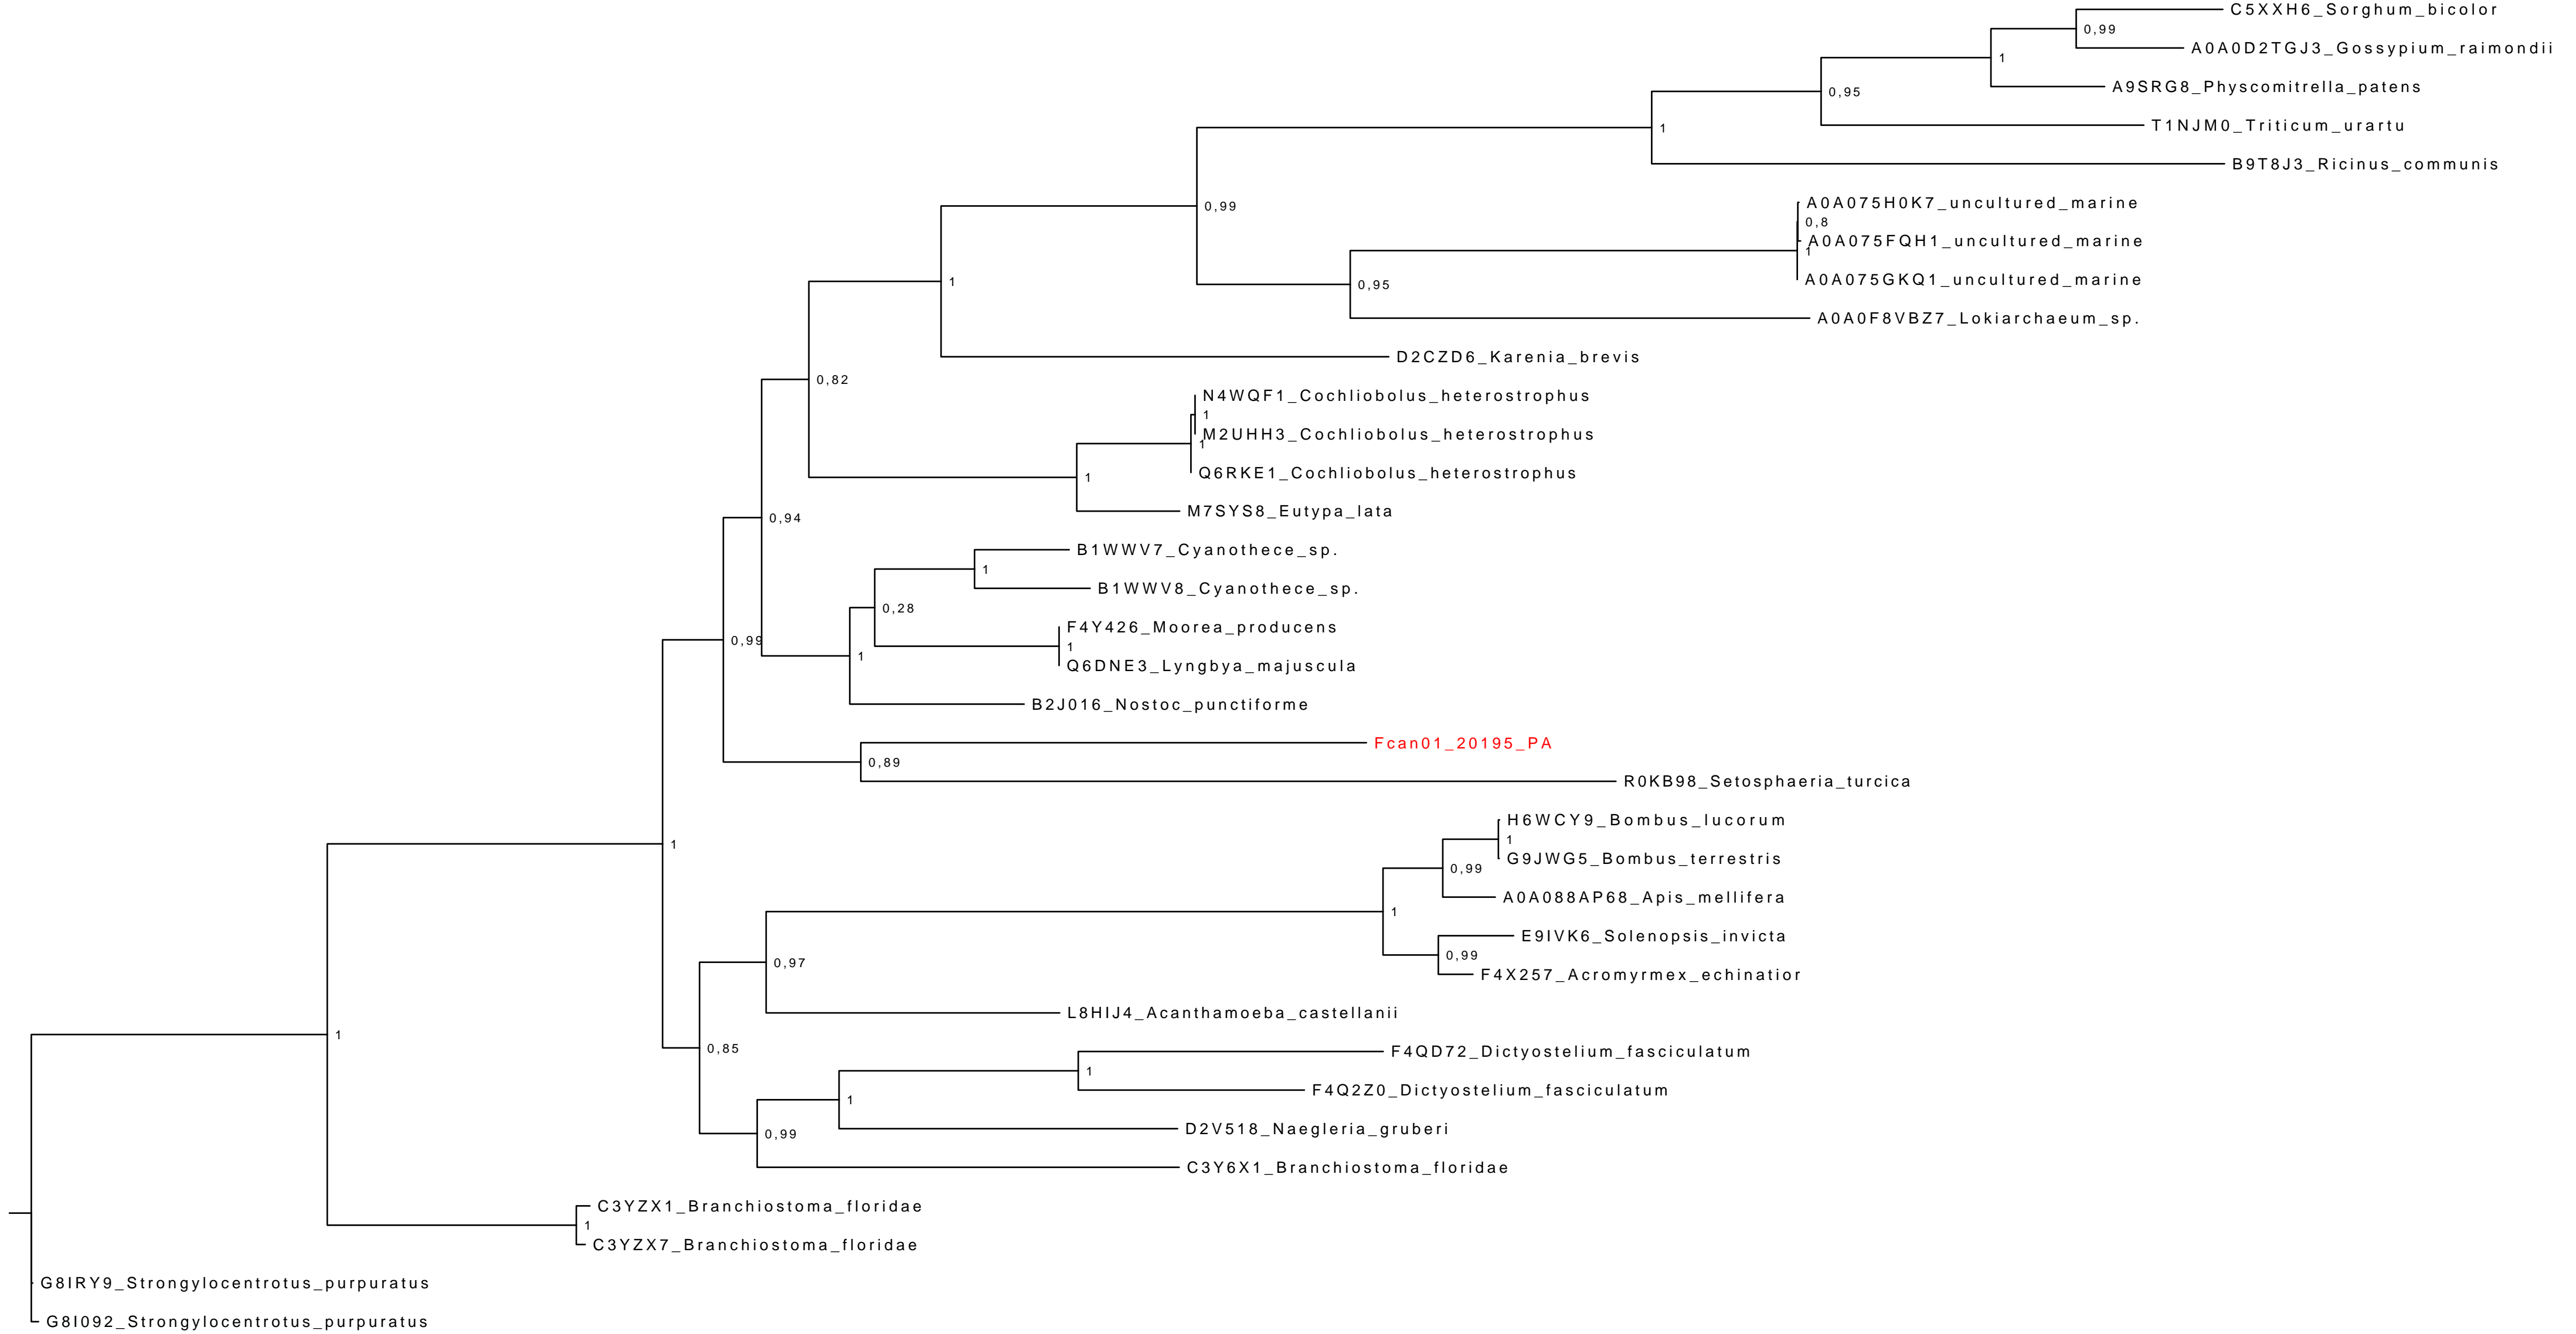

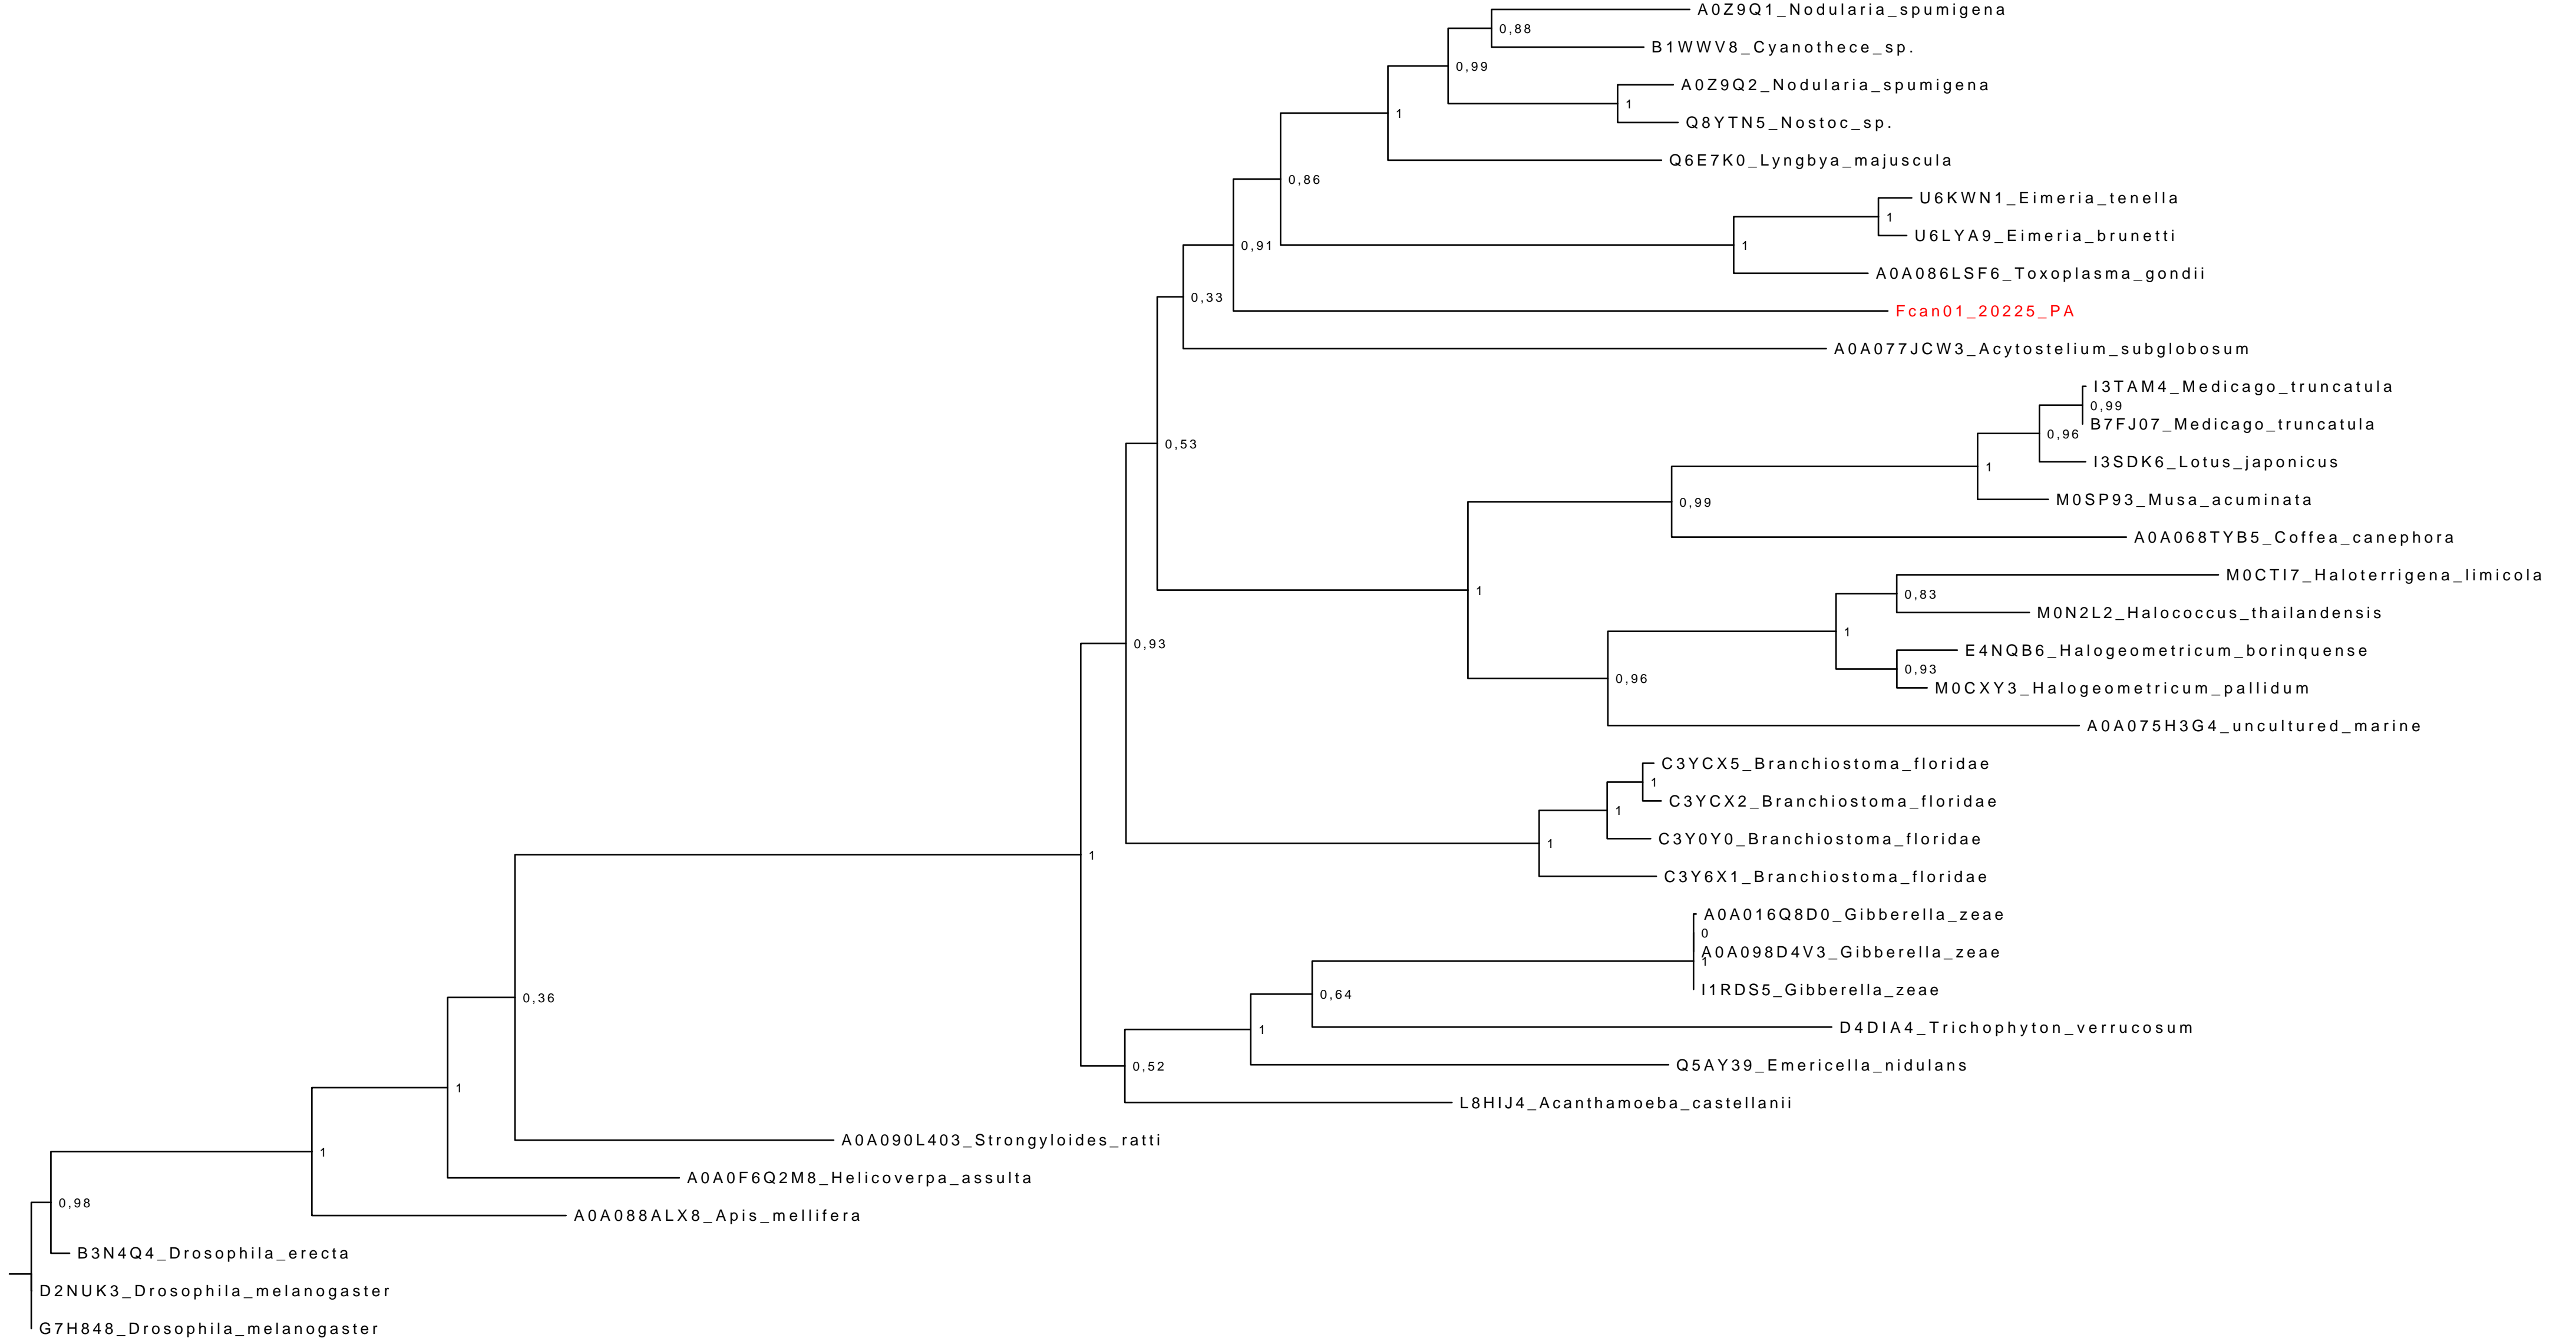

0.5

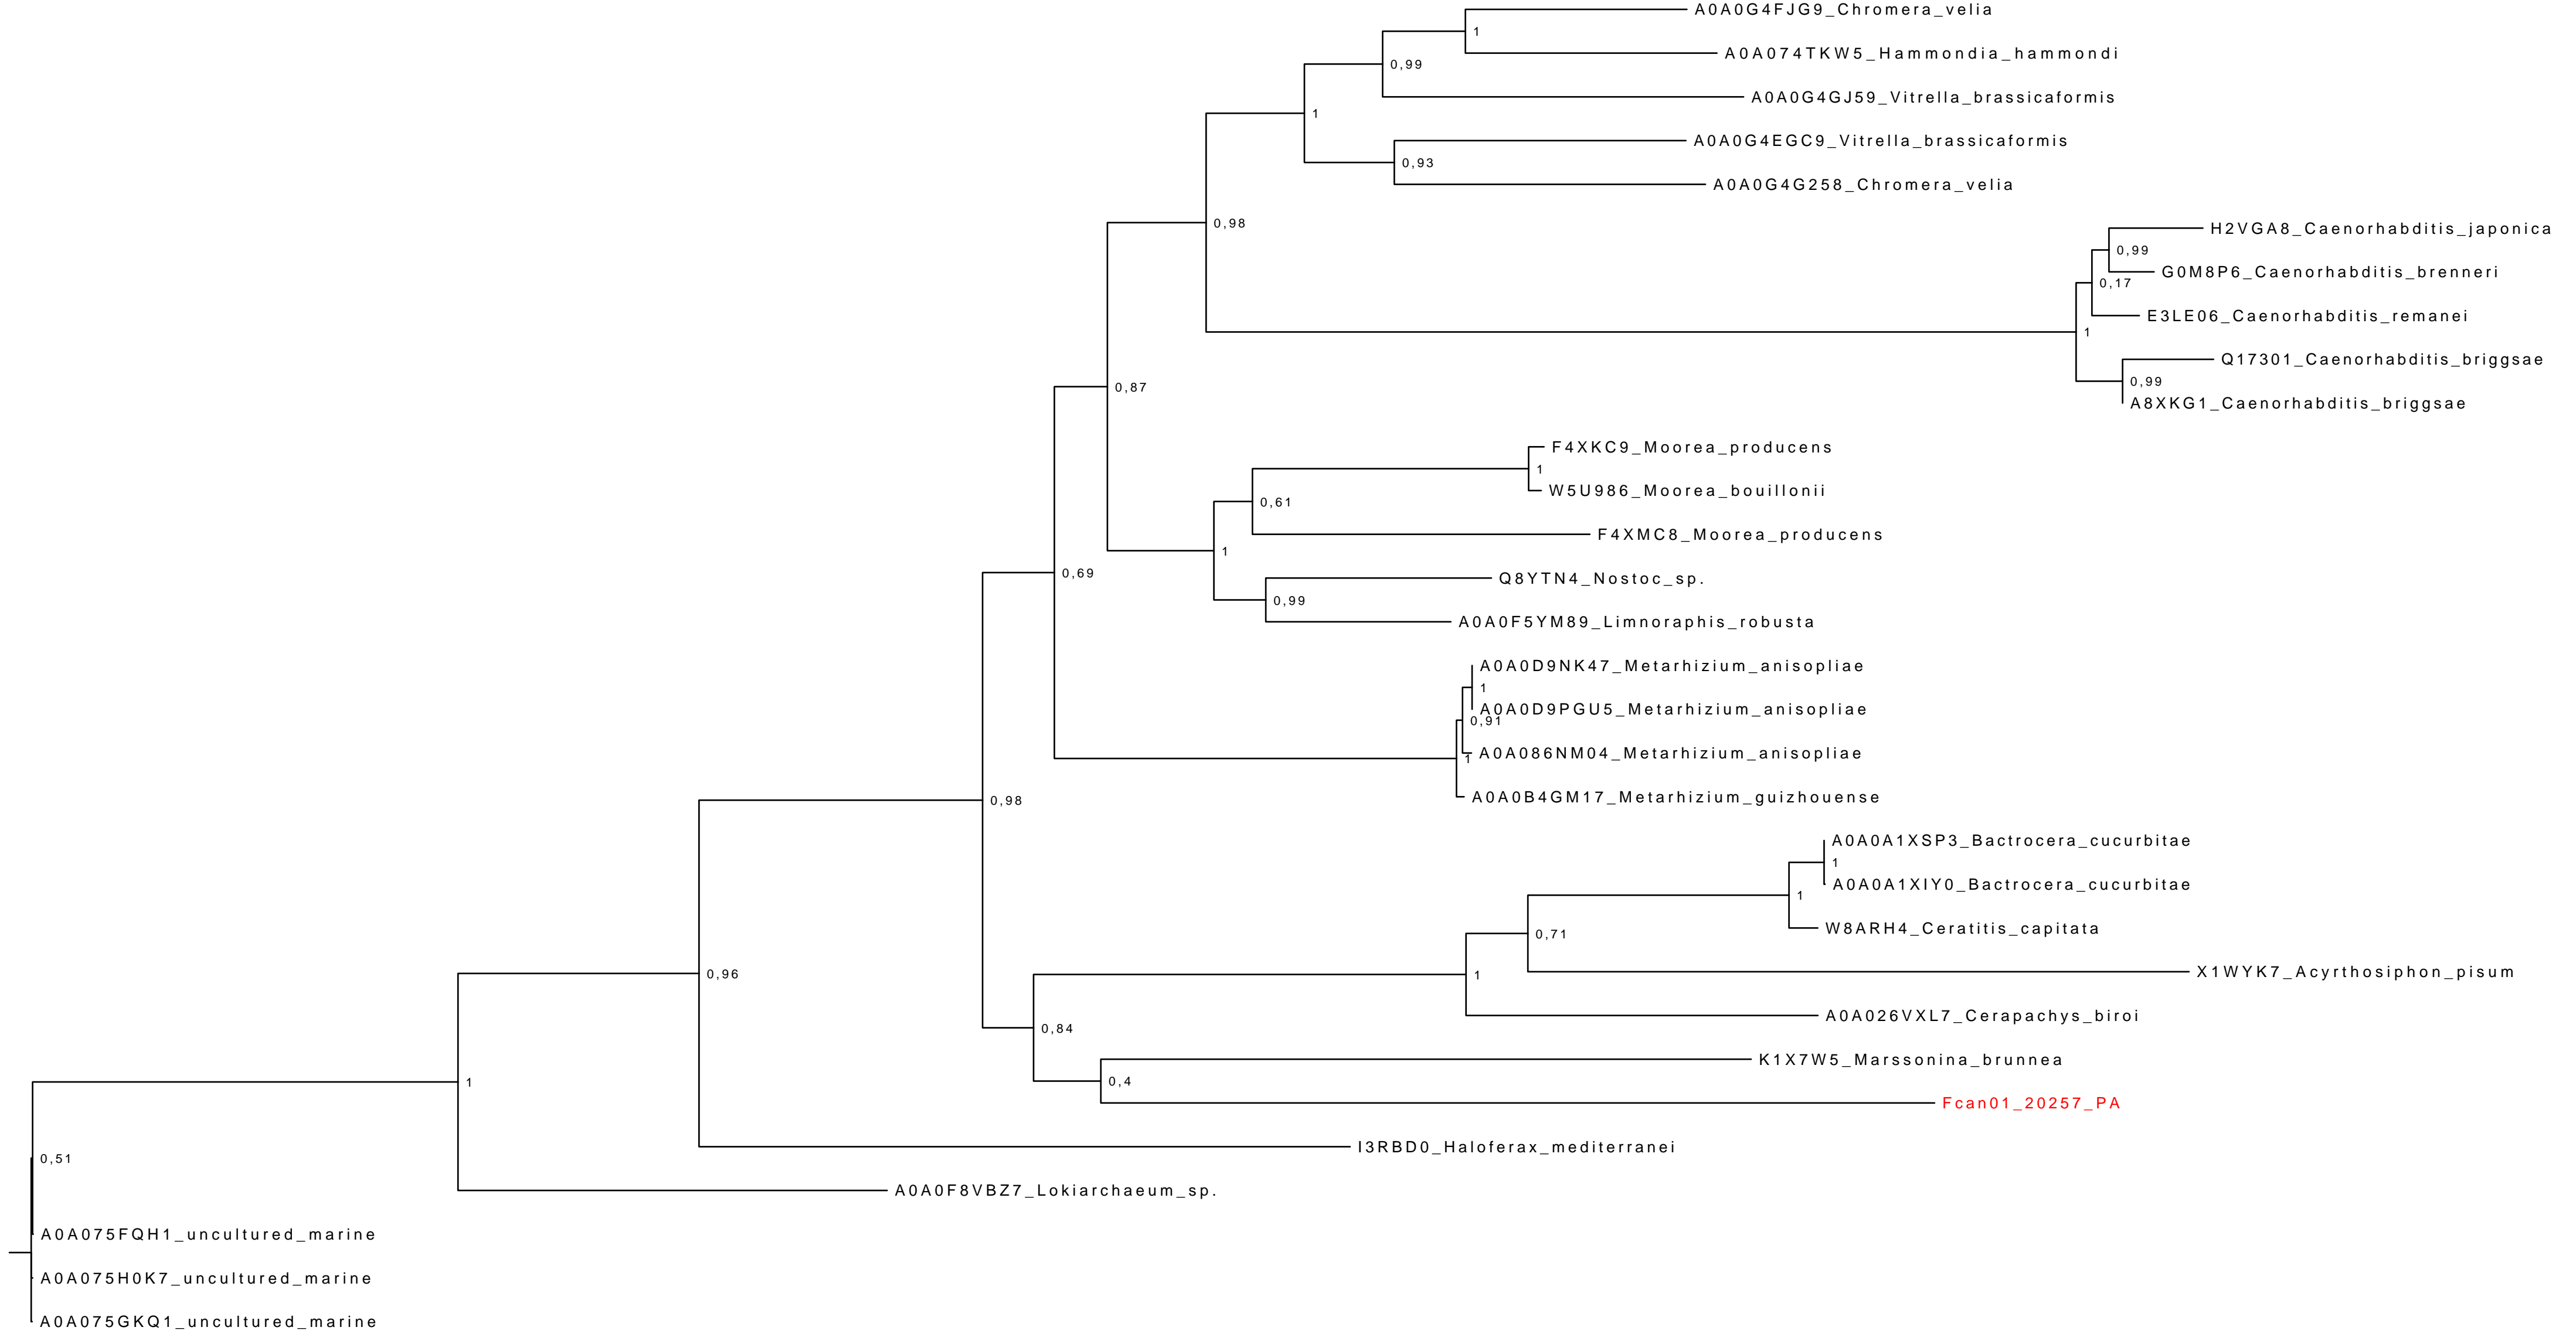

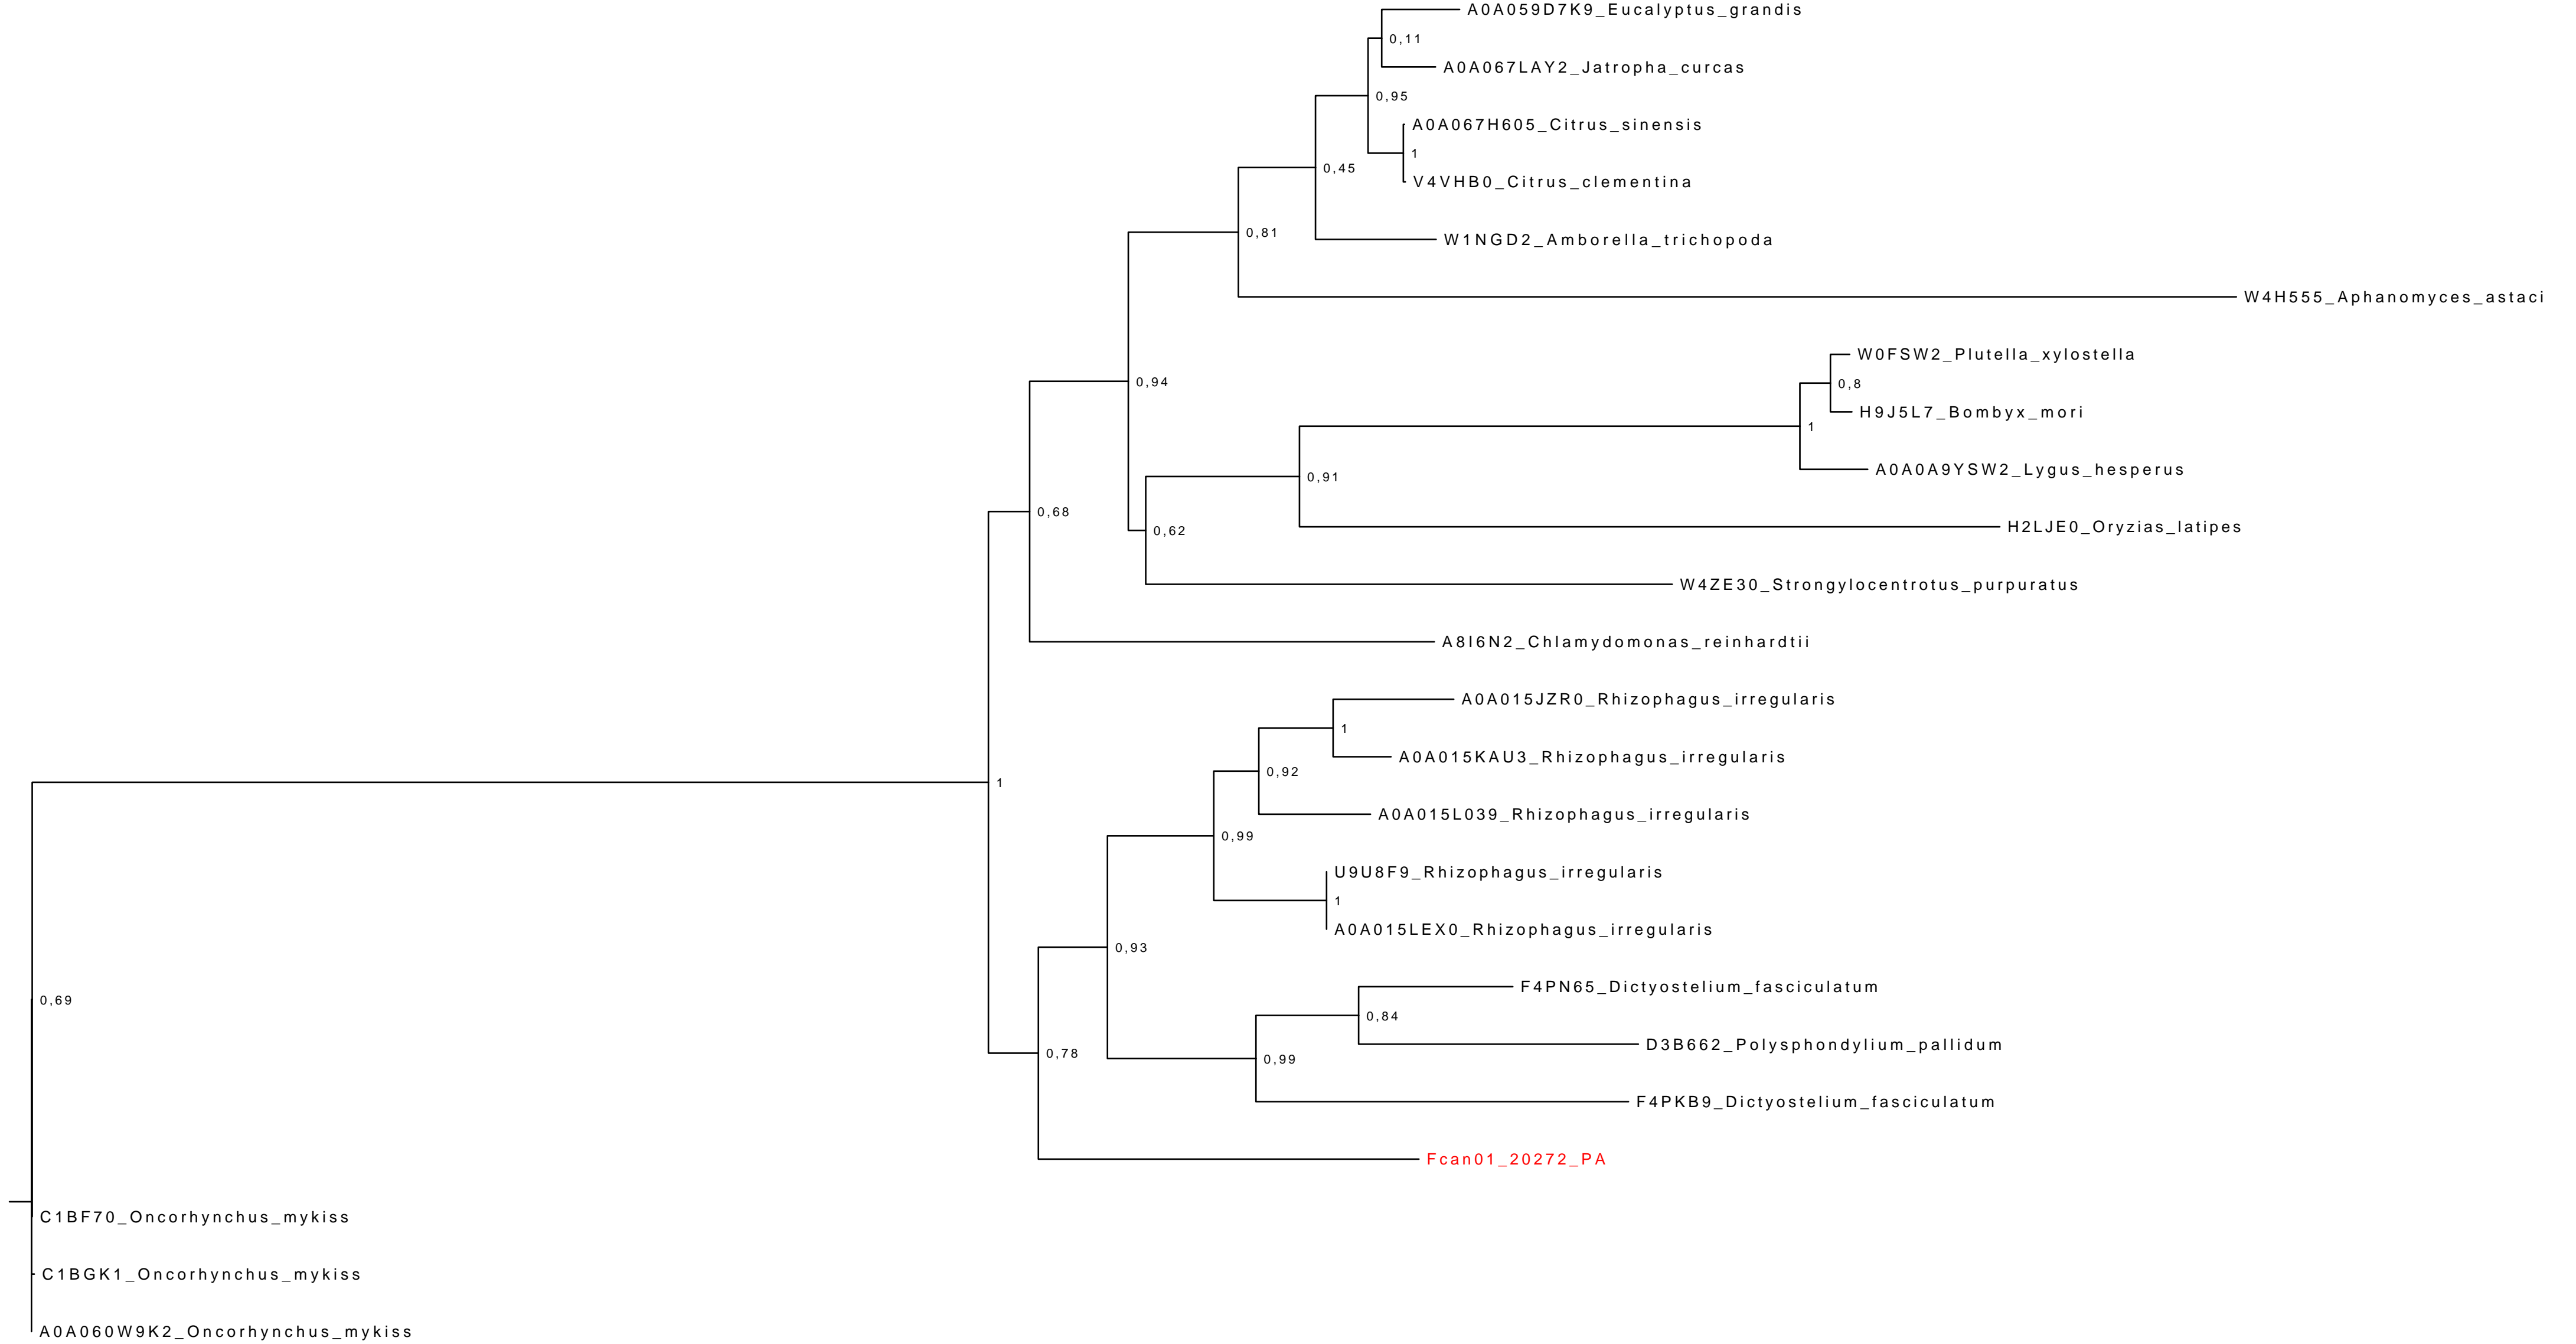

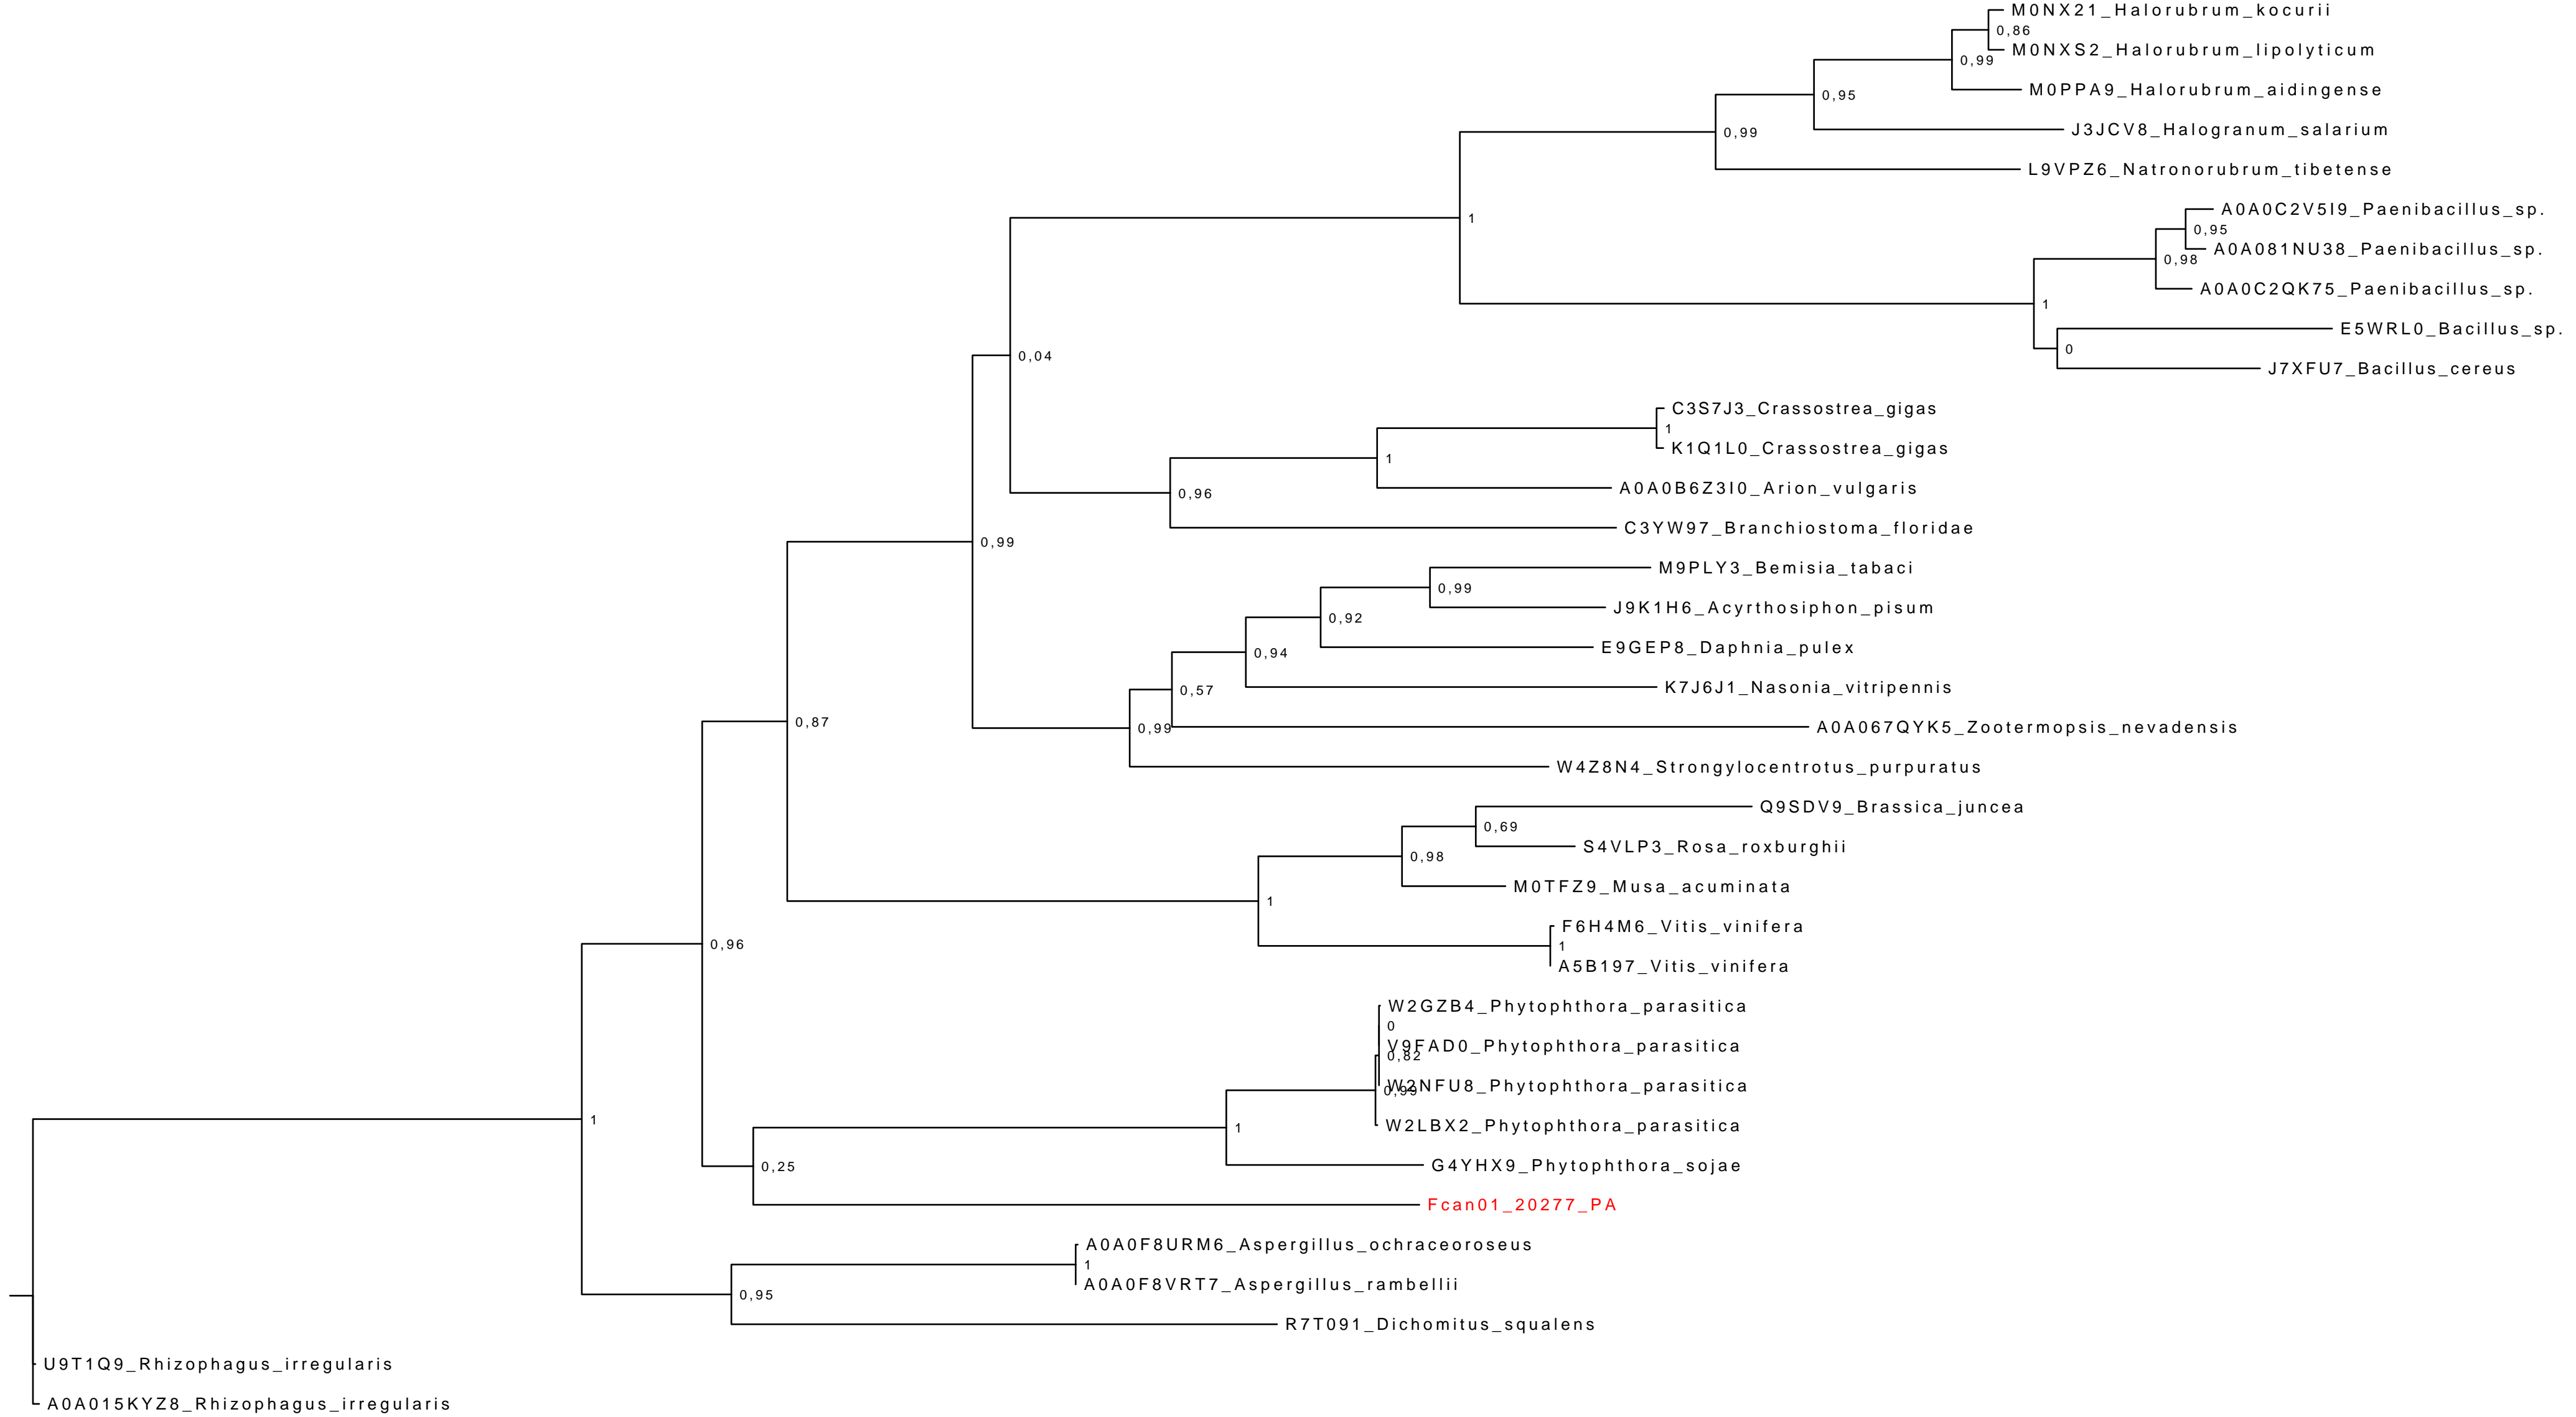

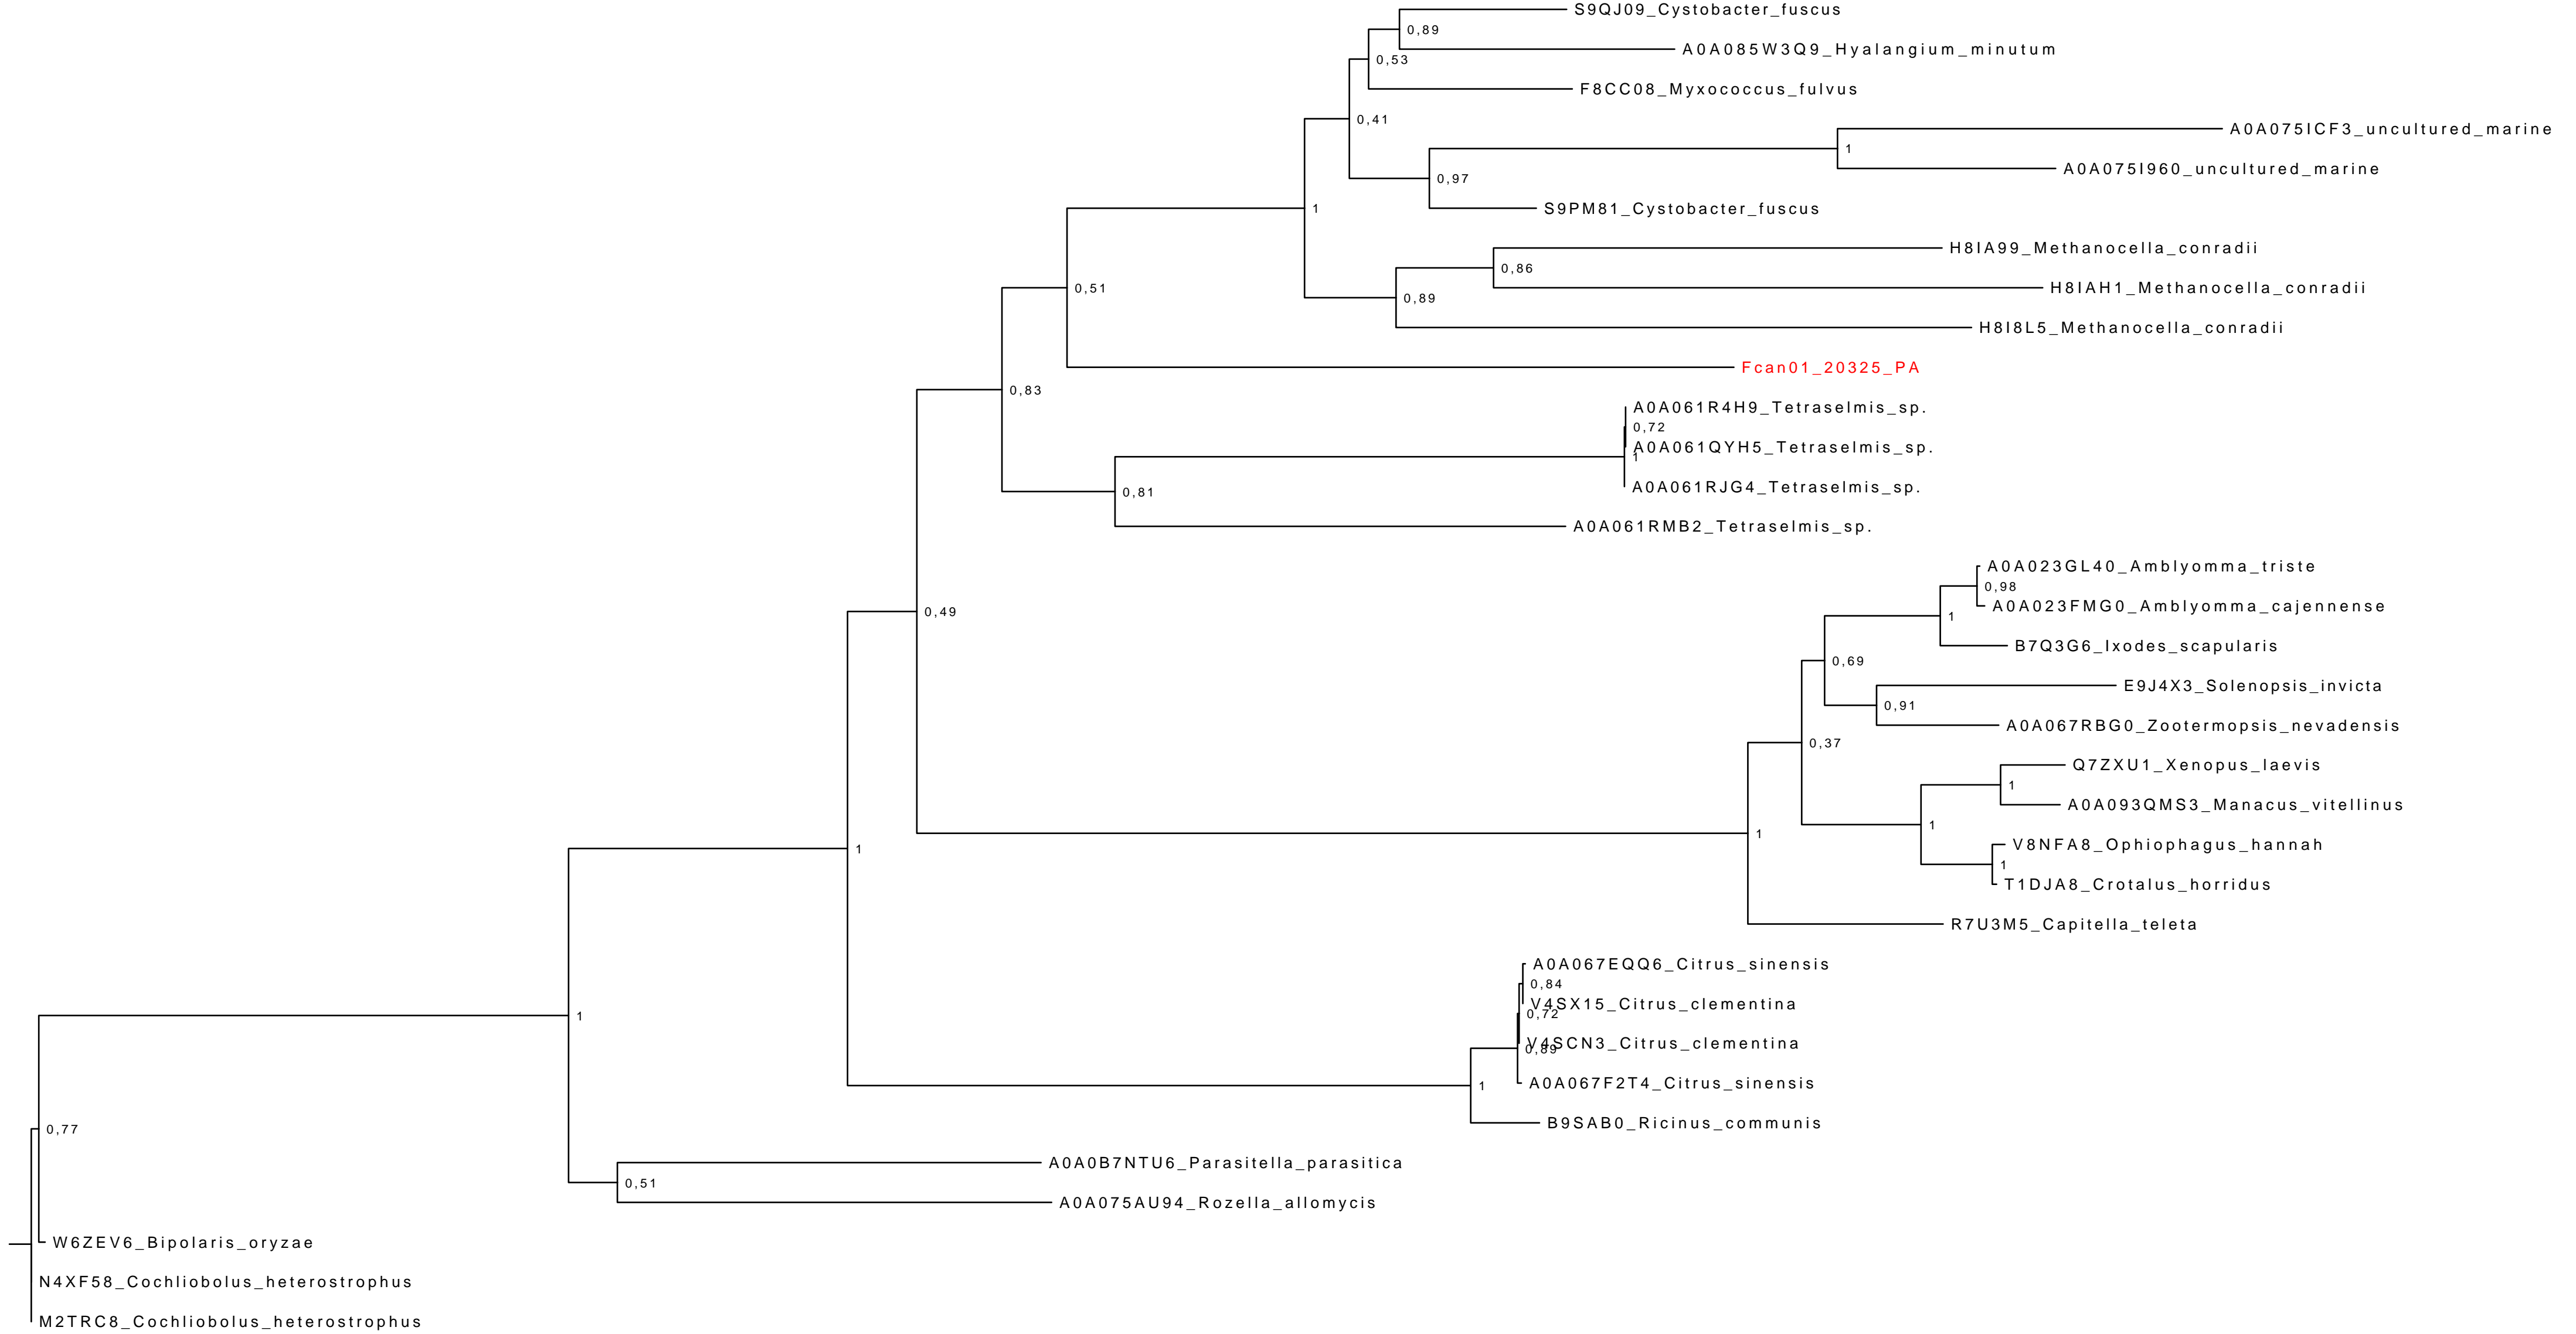

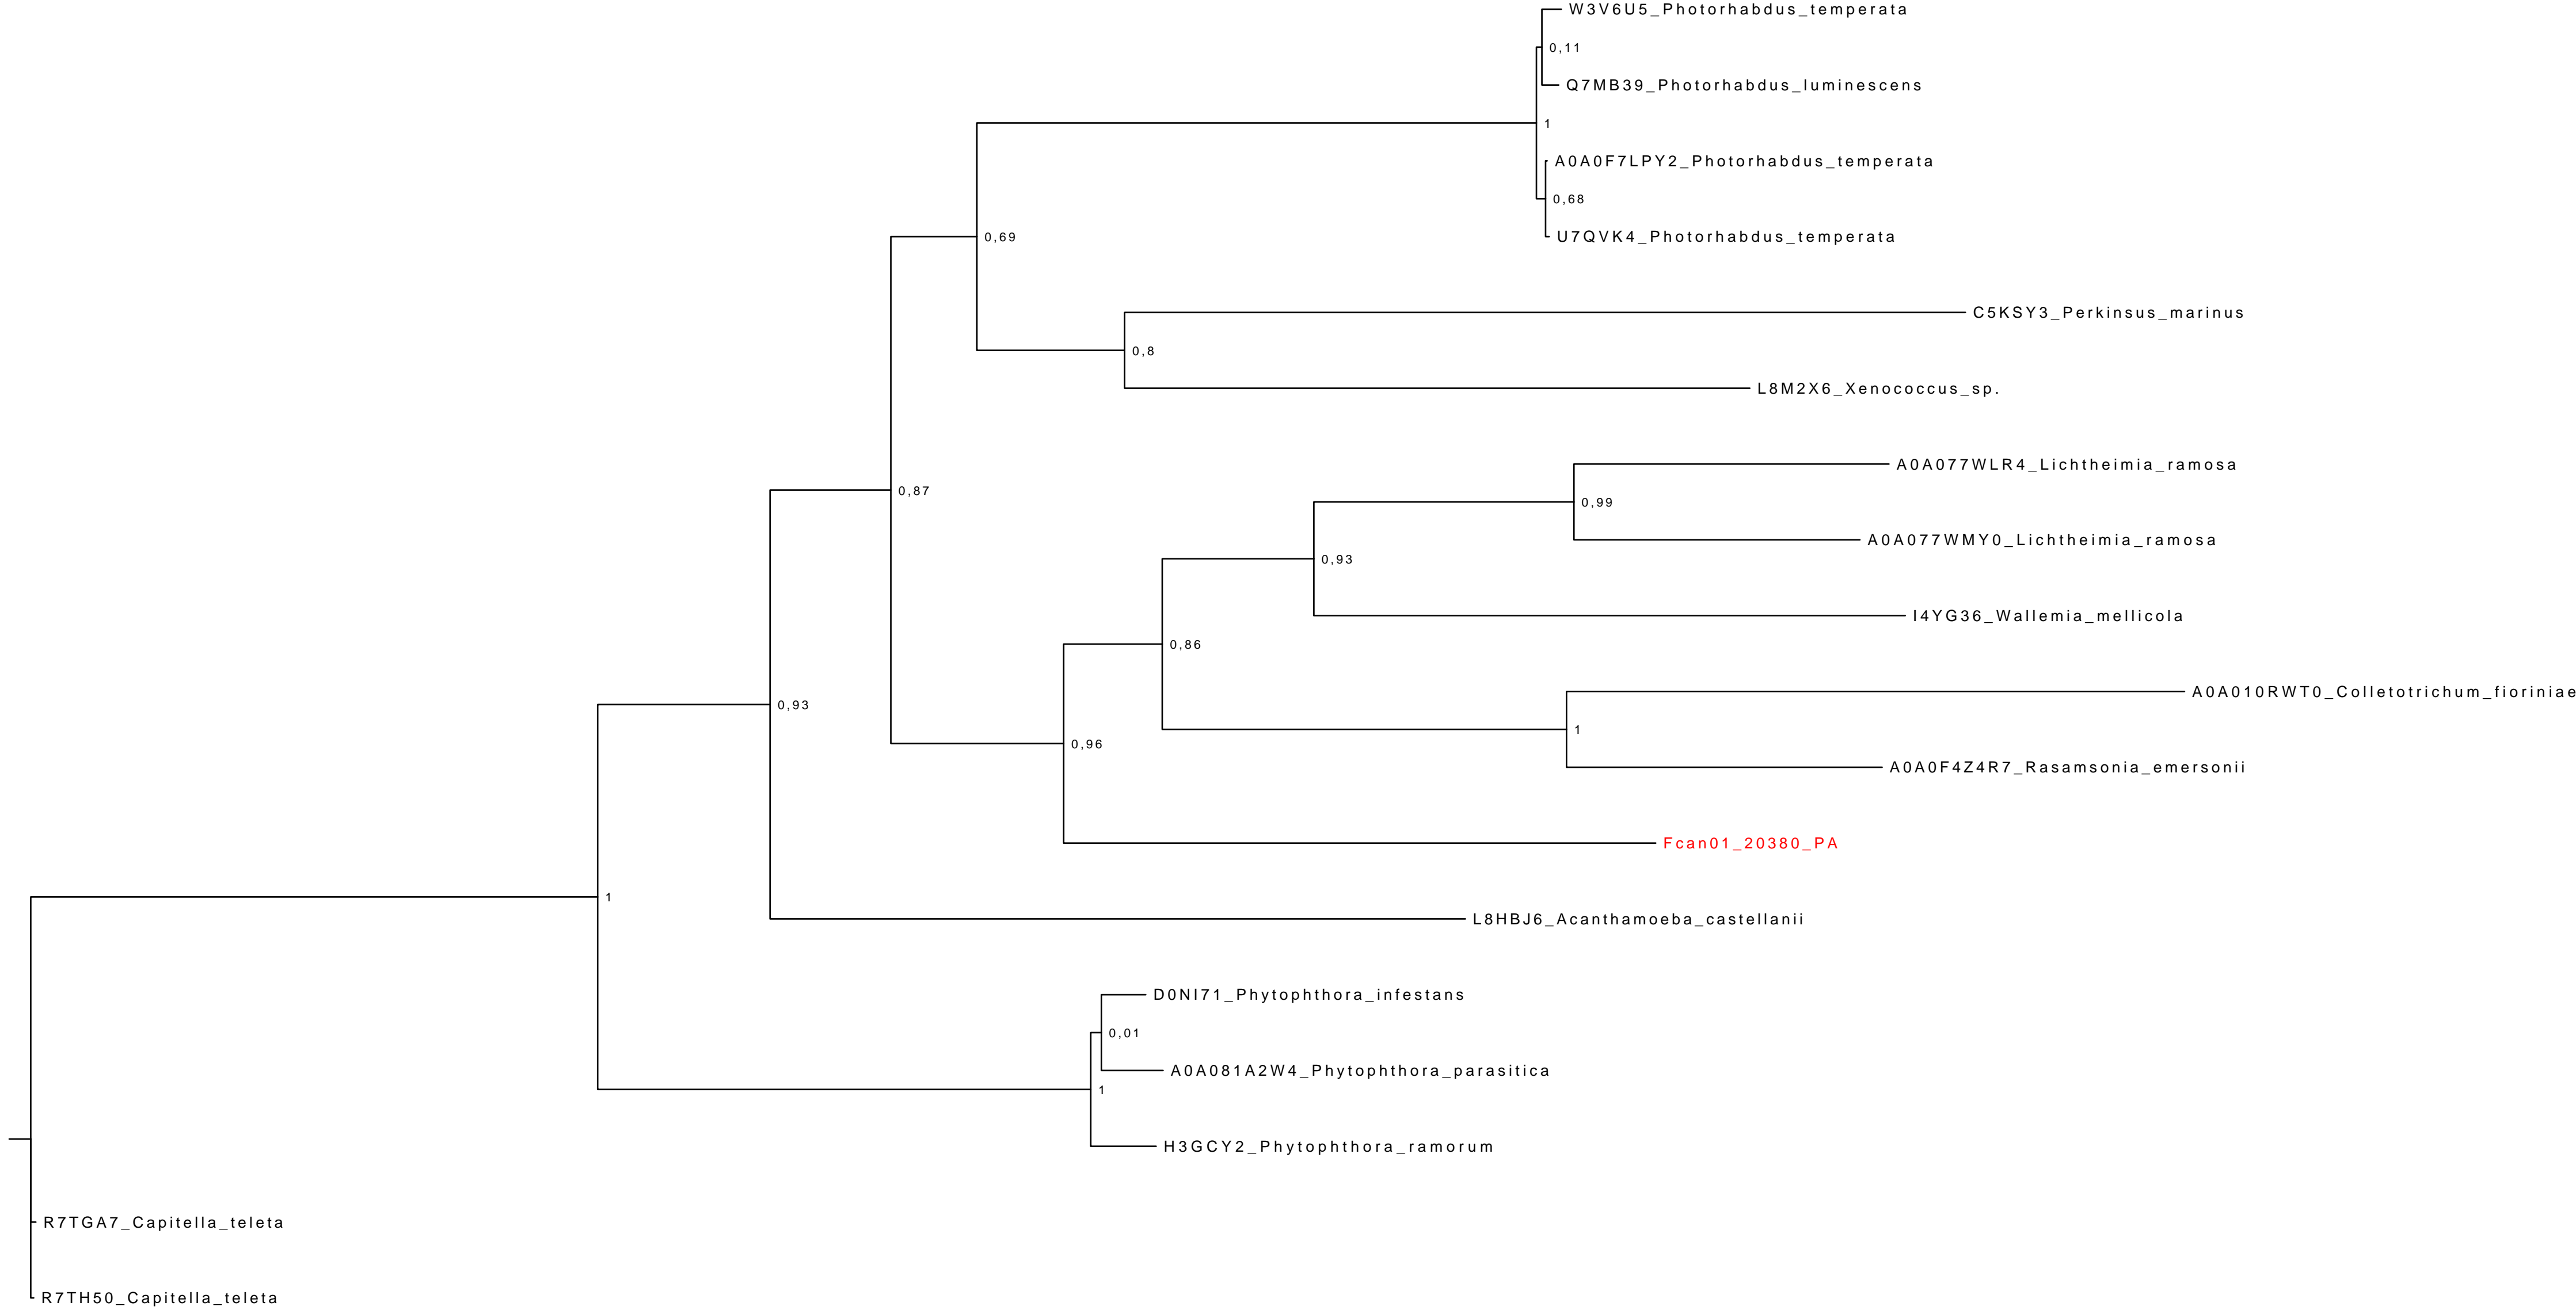



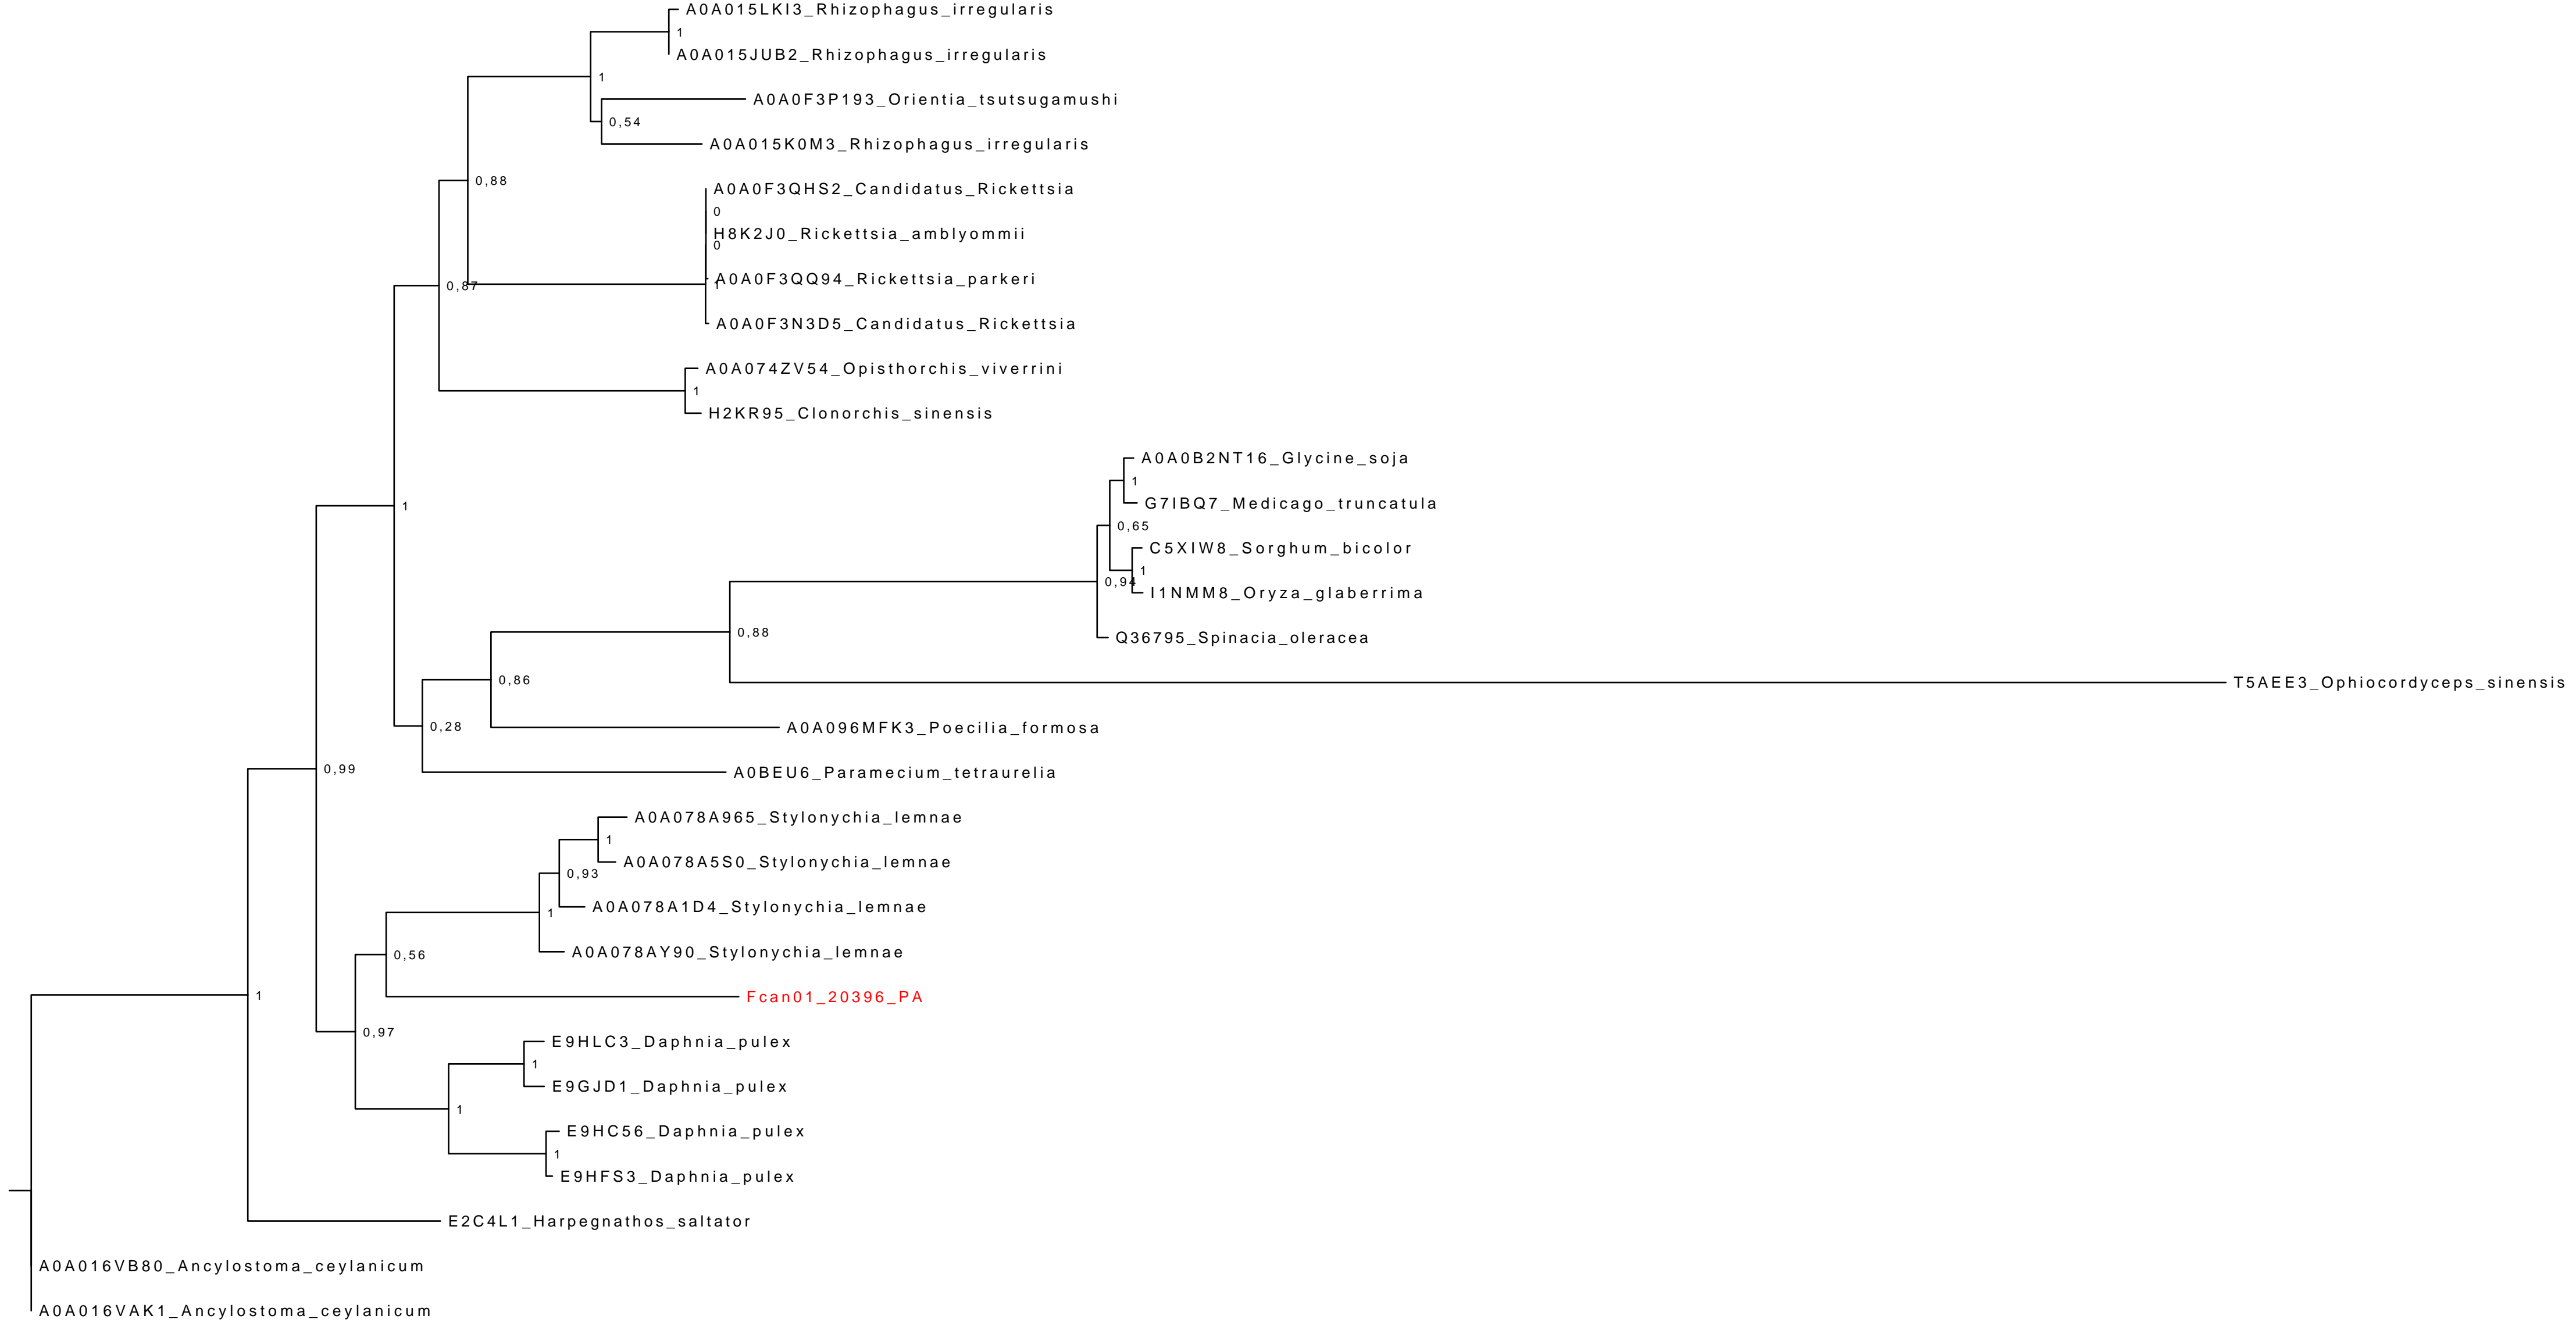

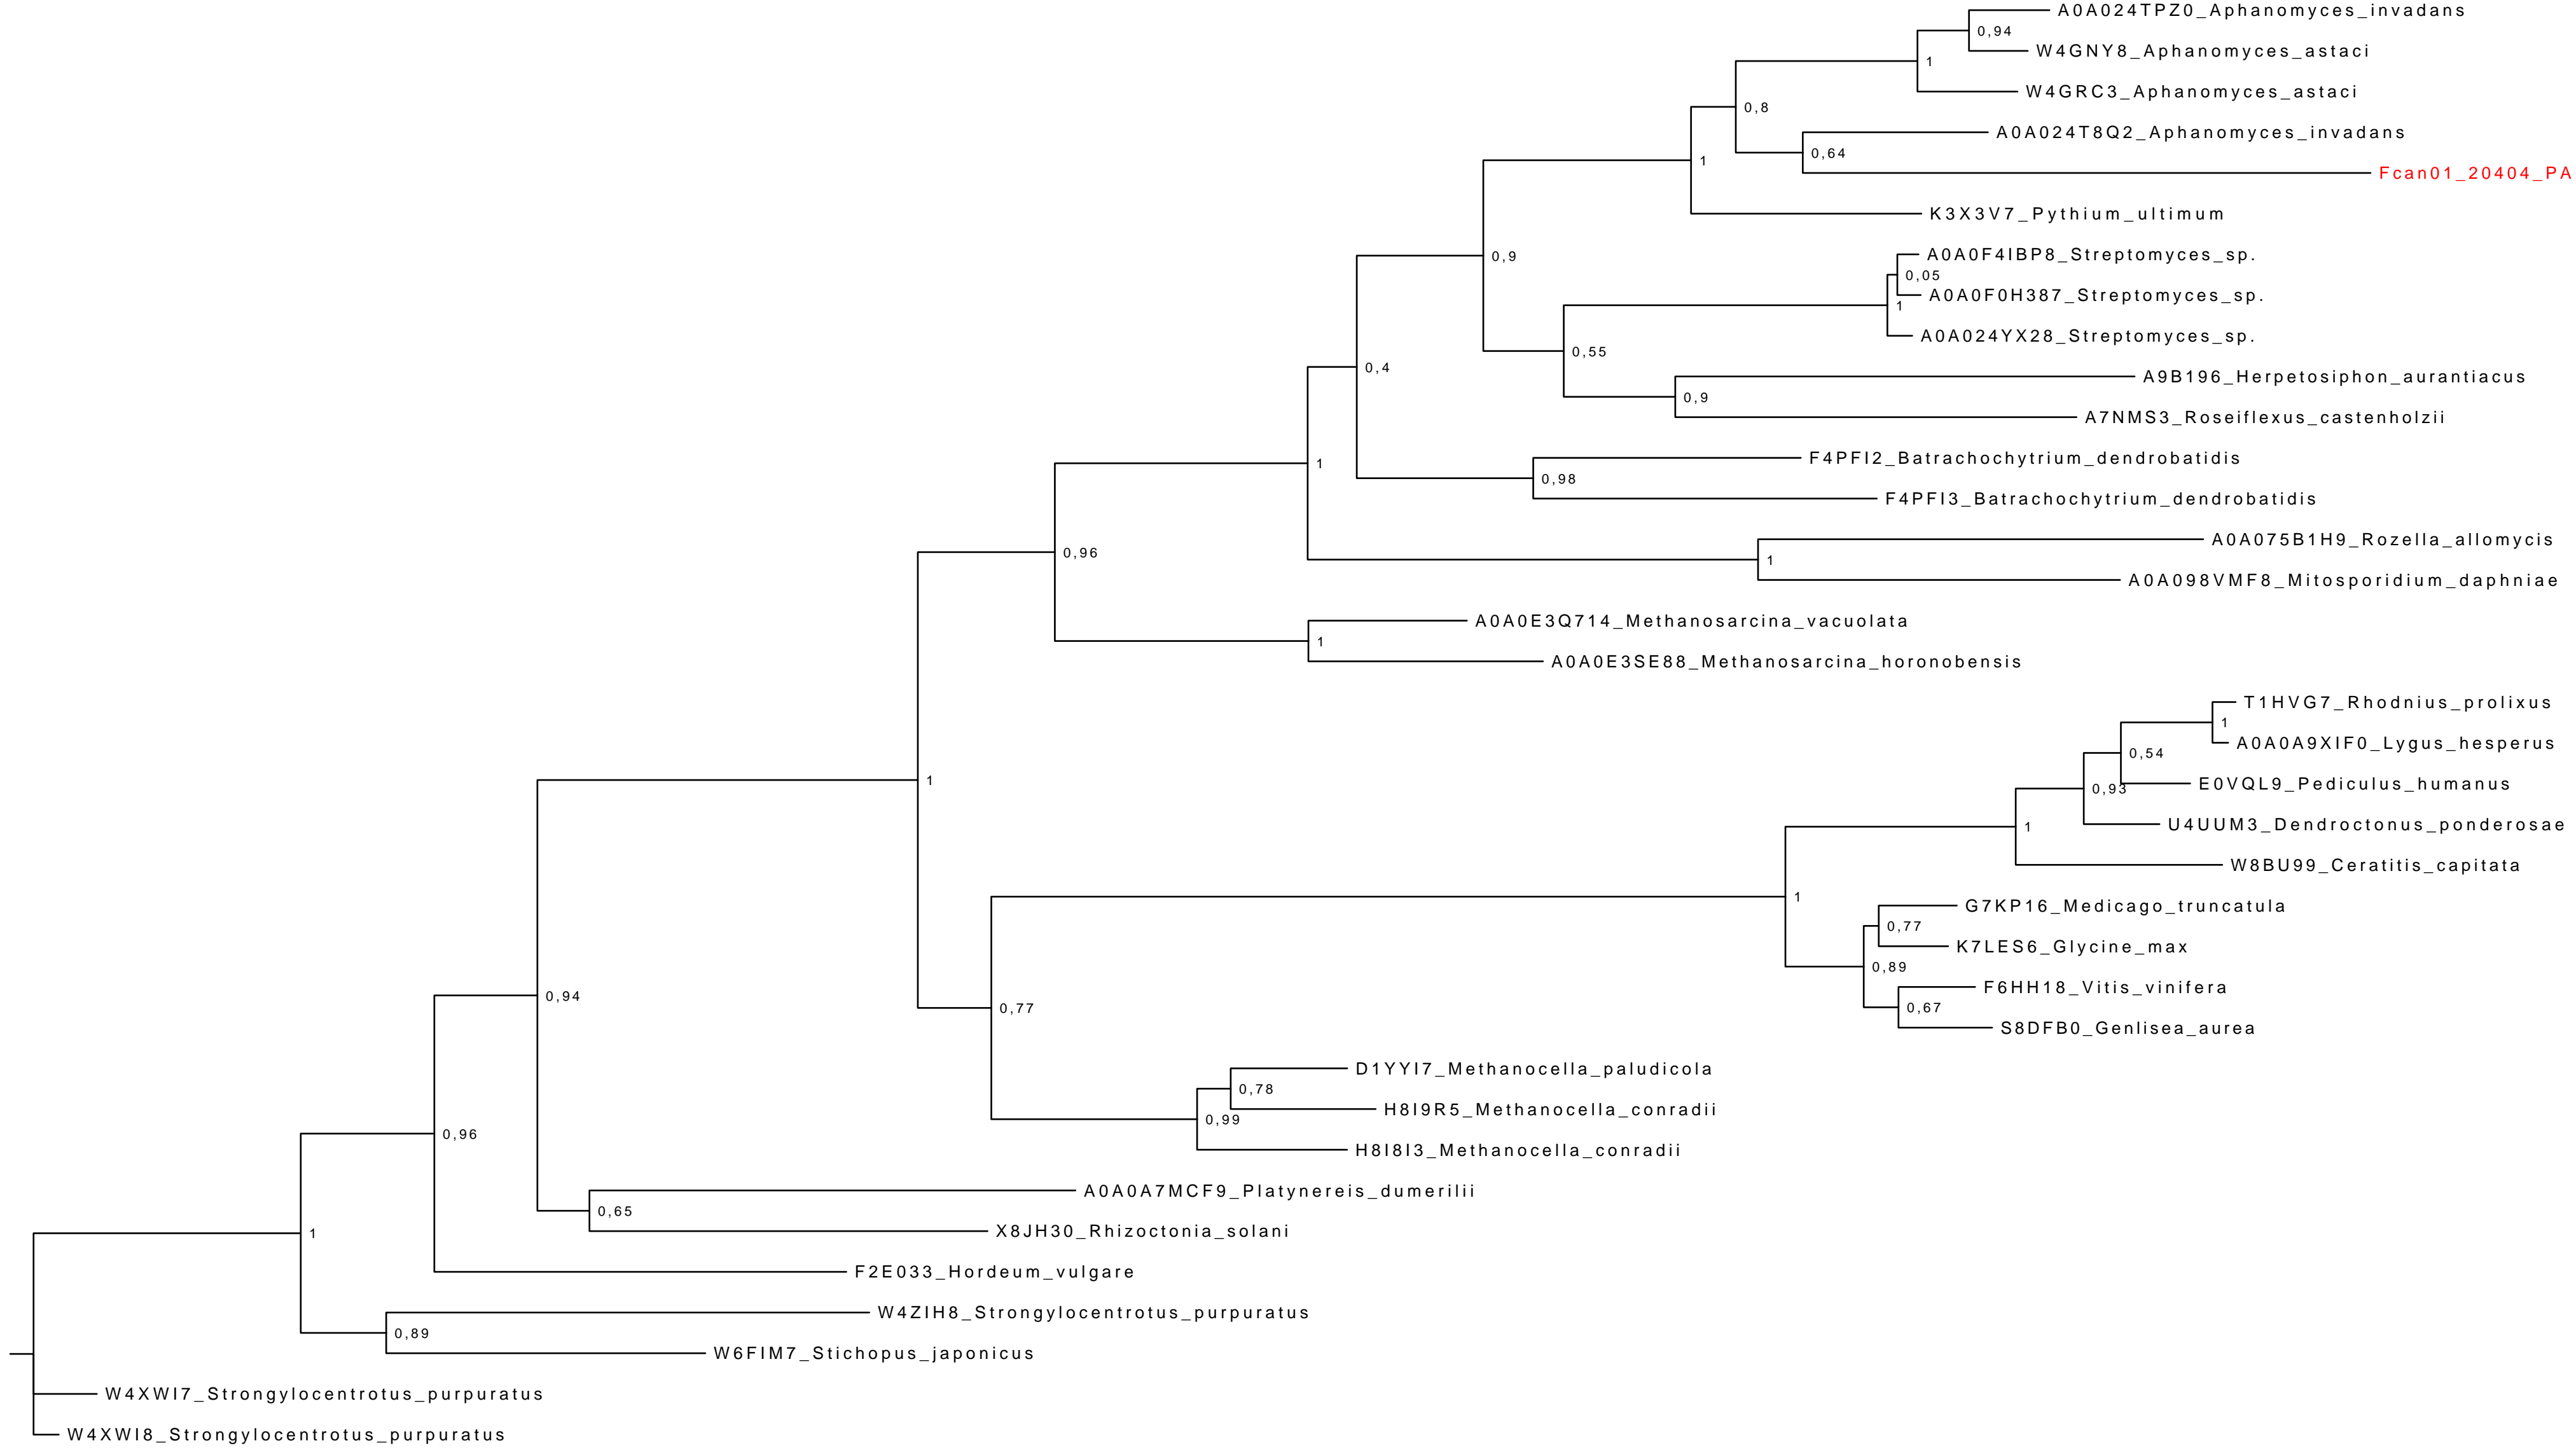

0.5

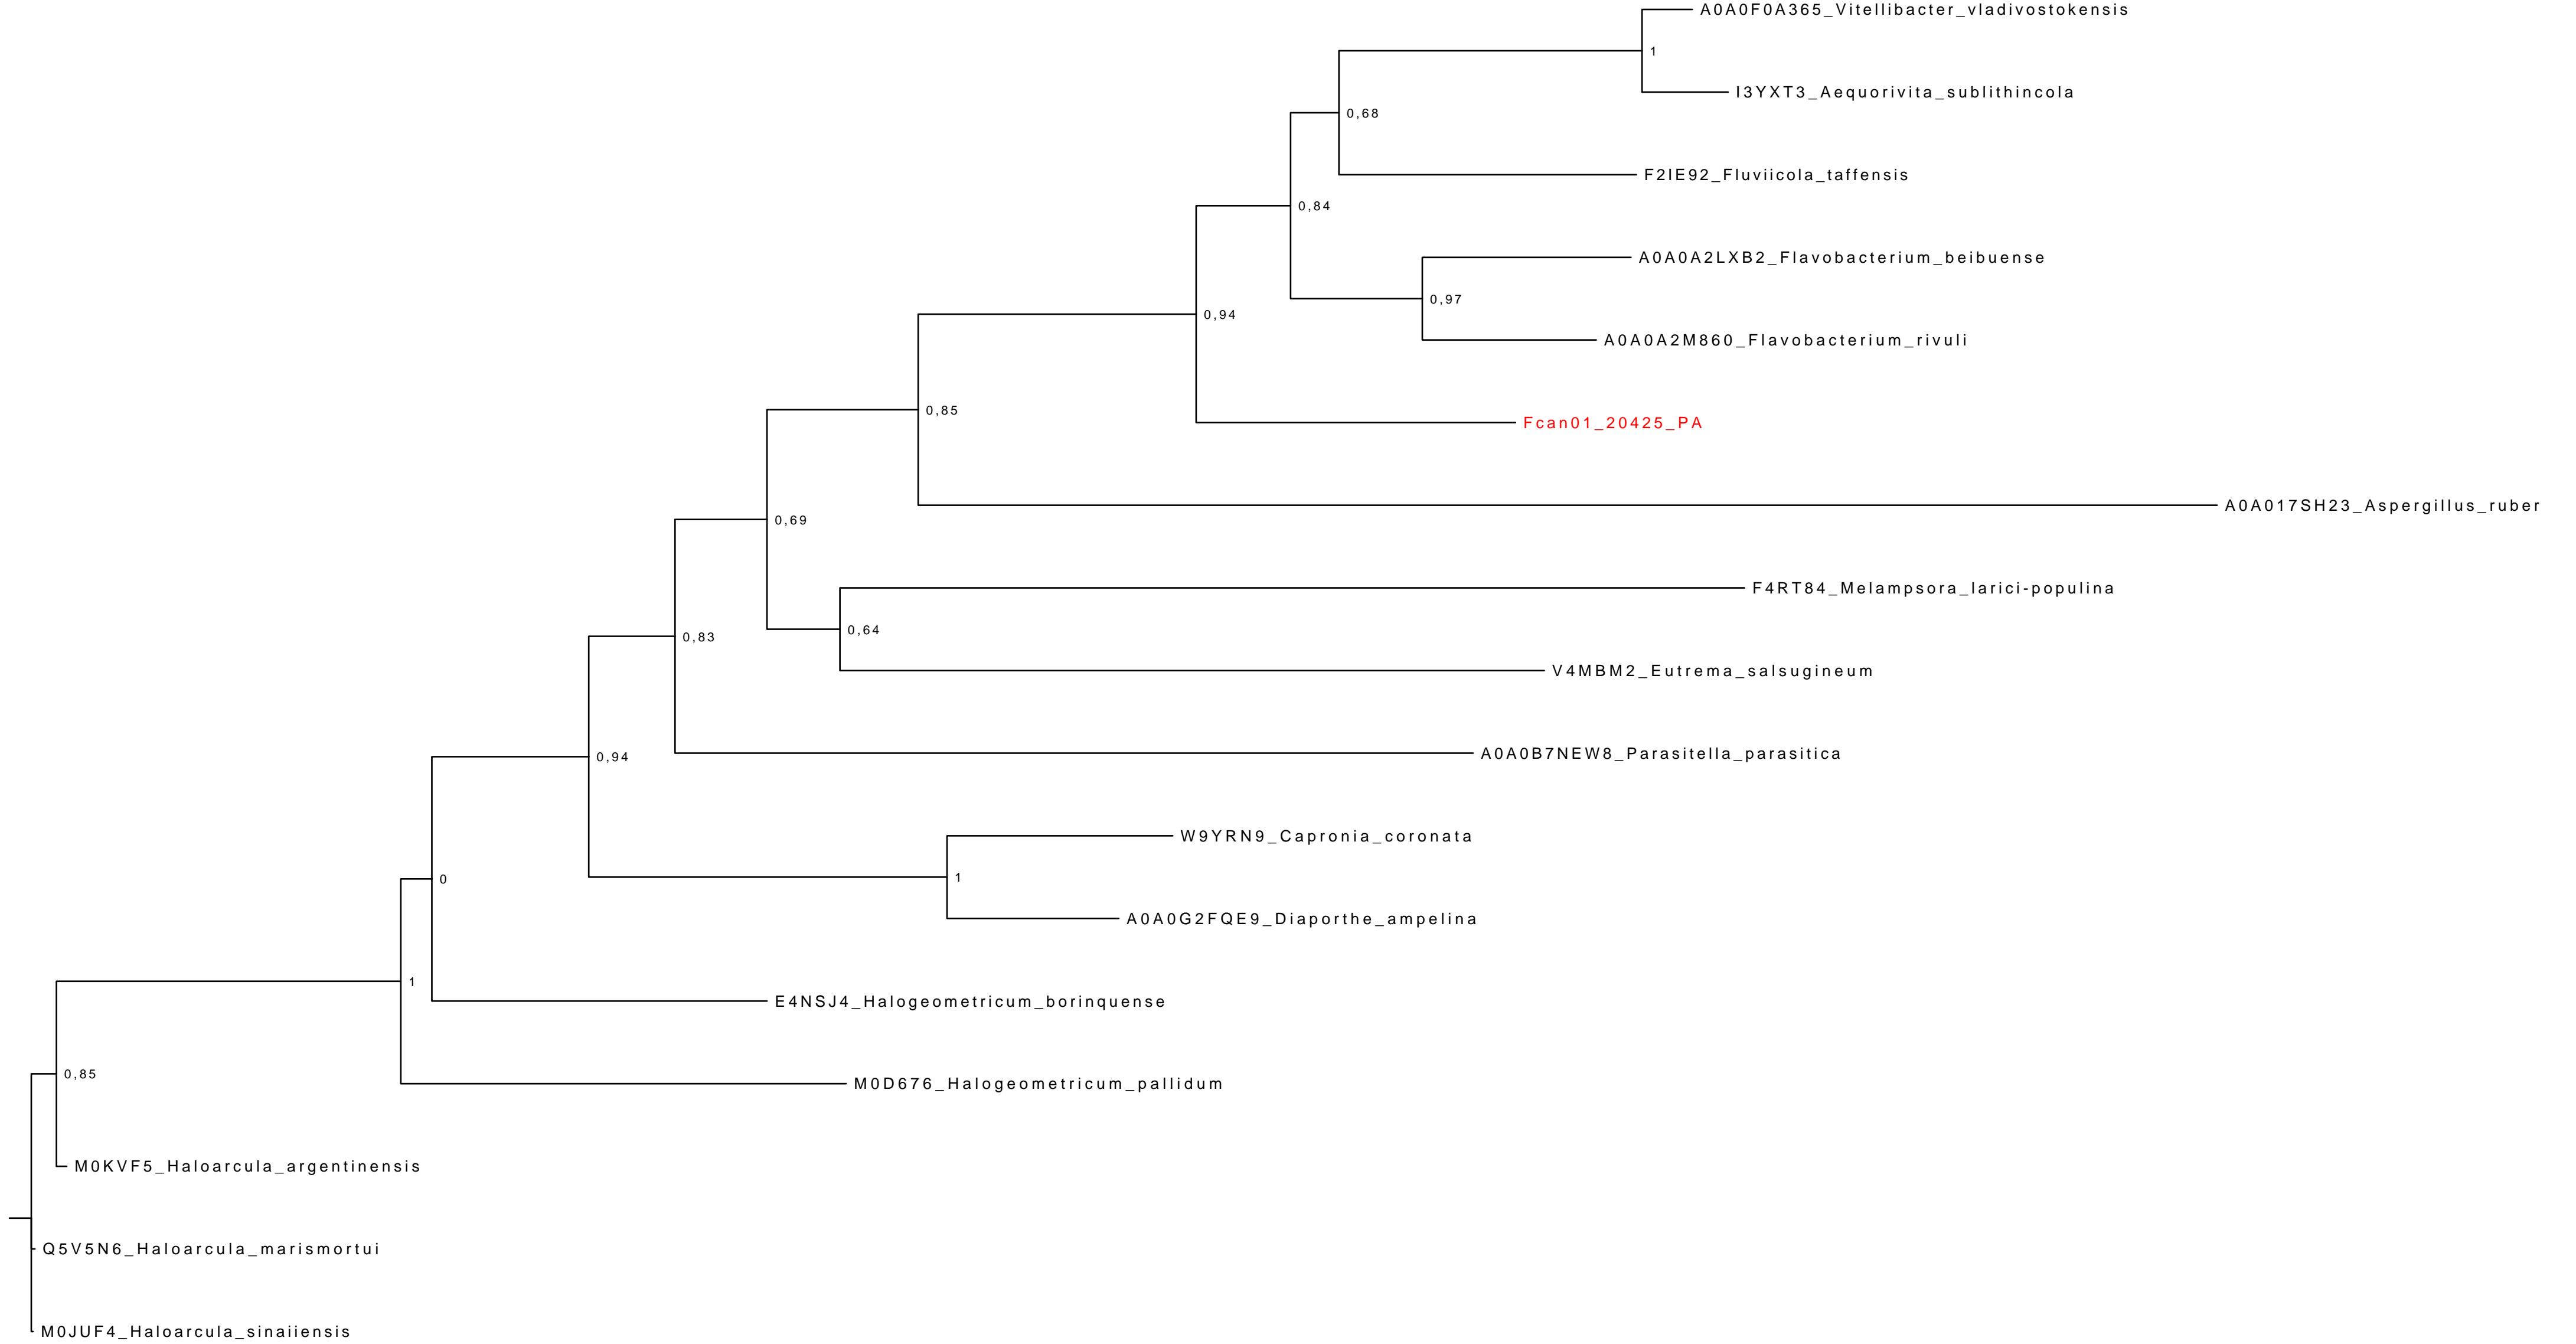

0.5

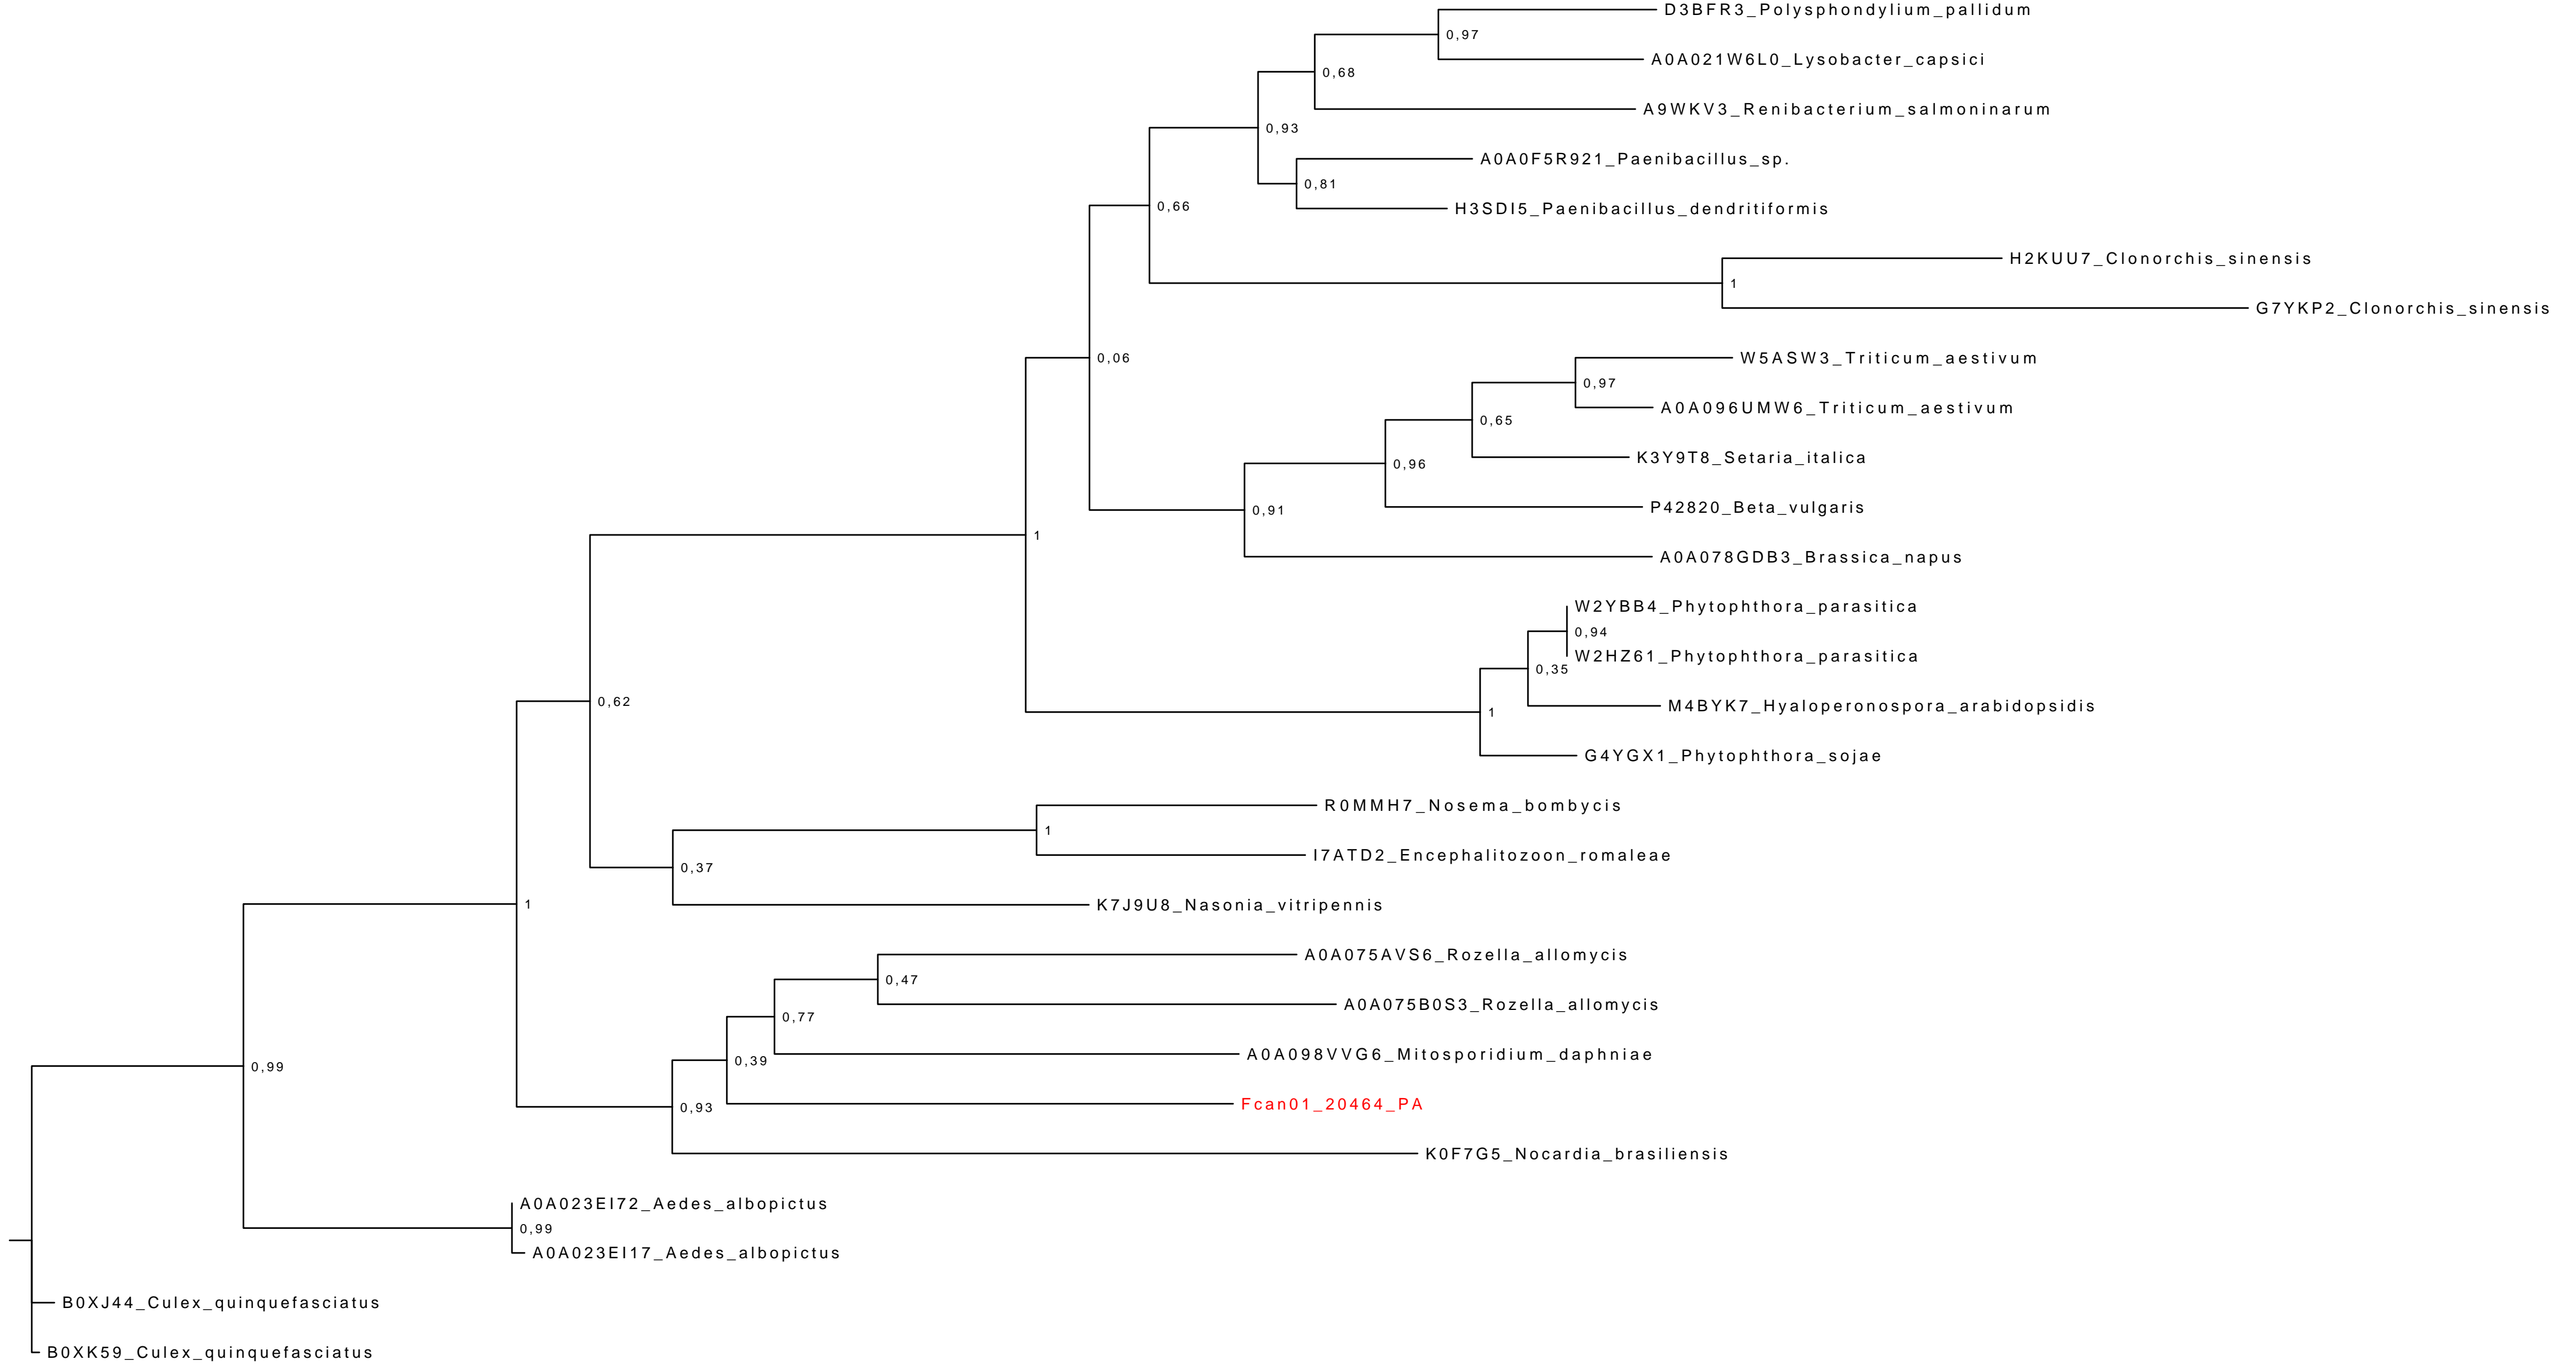

0.4

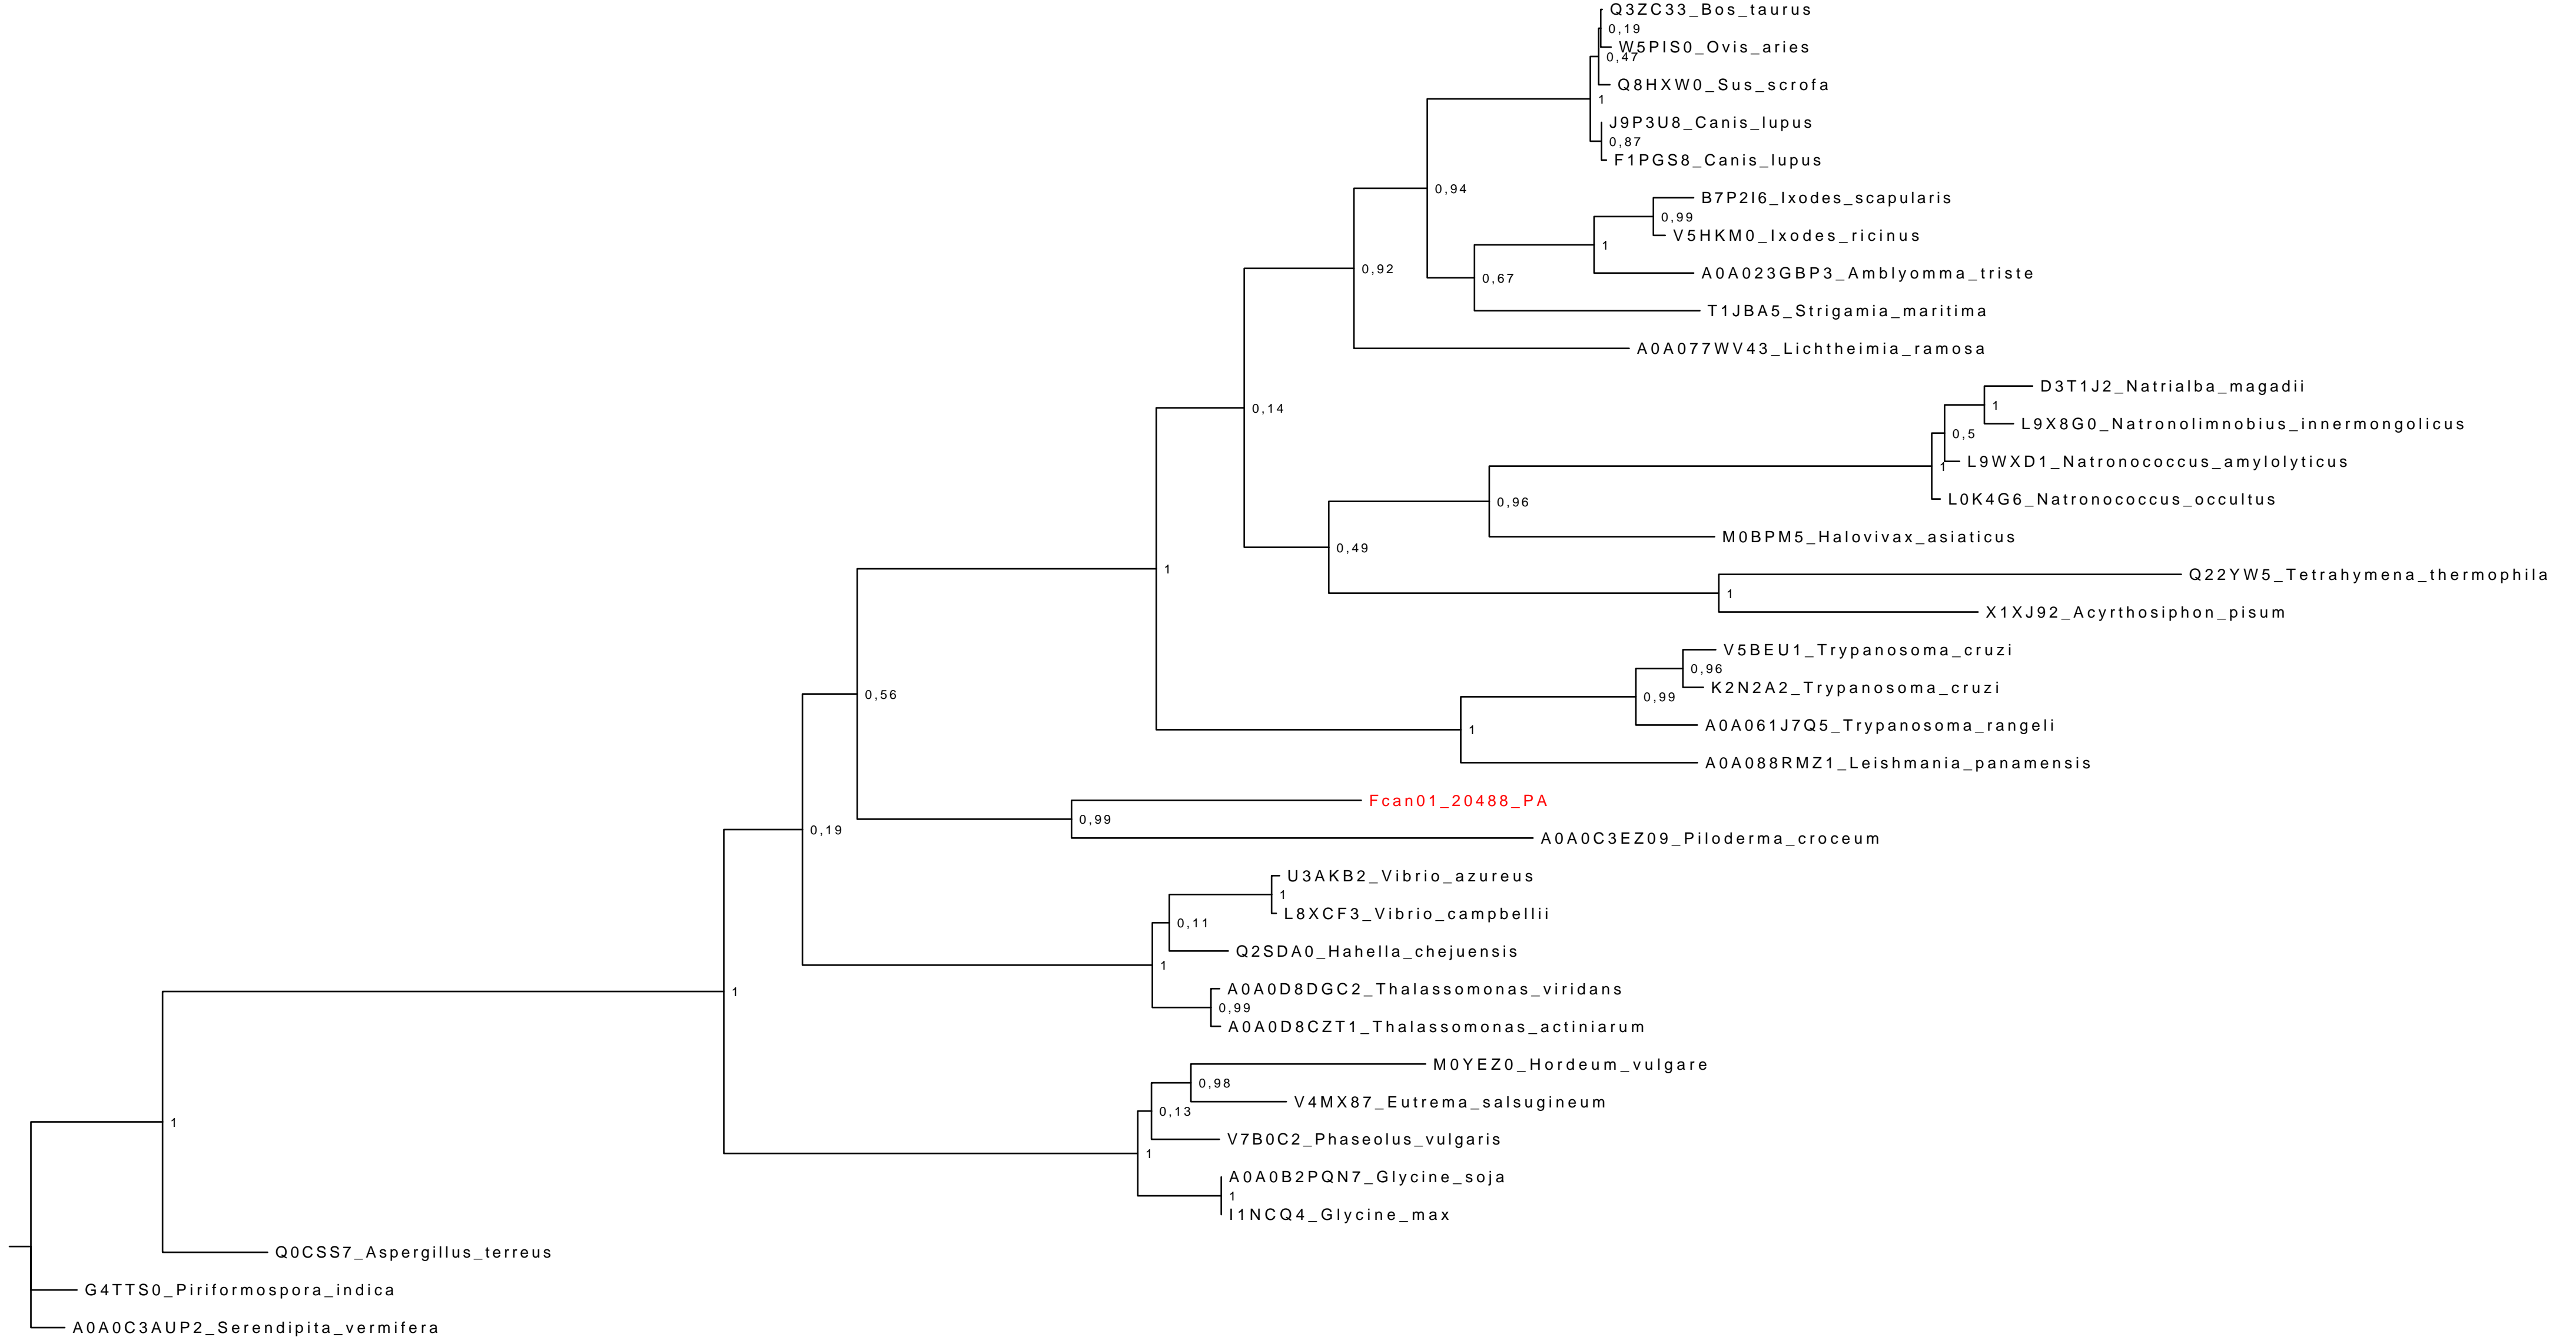

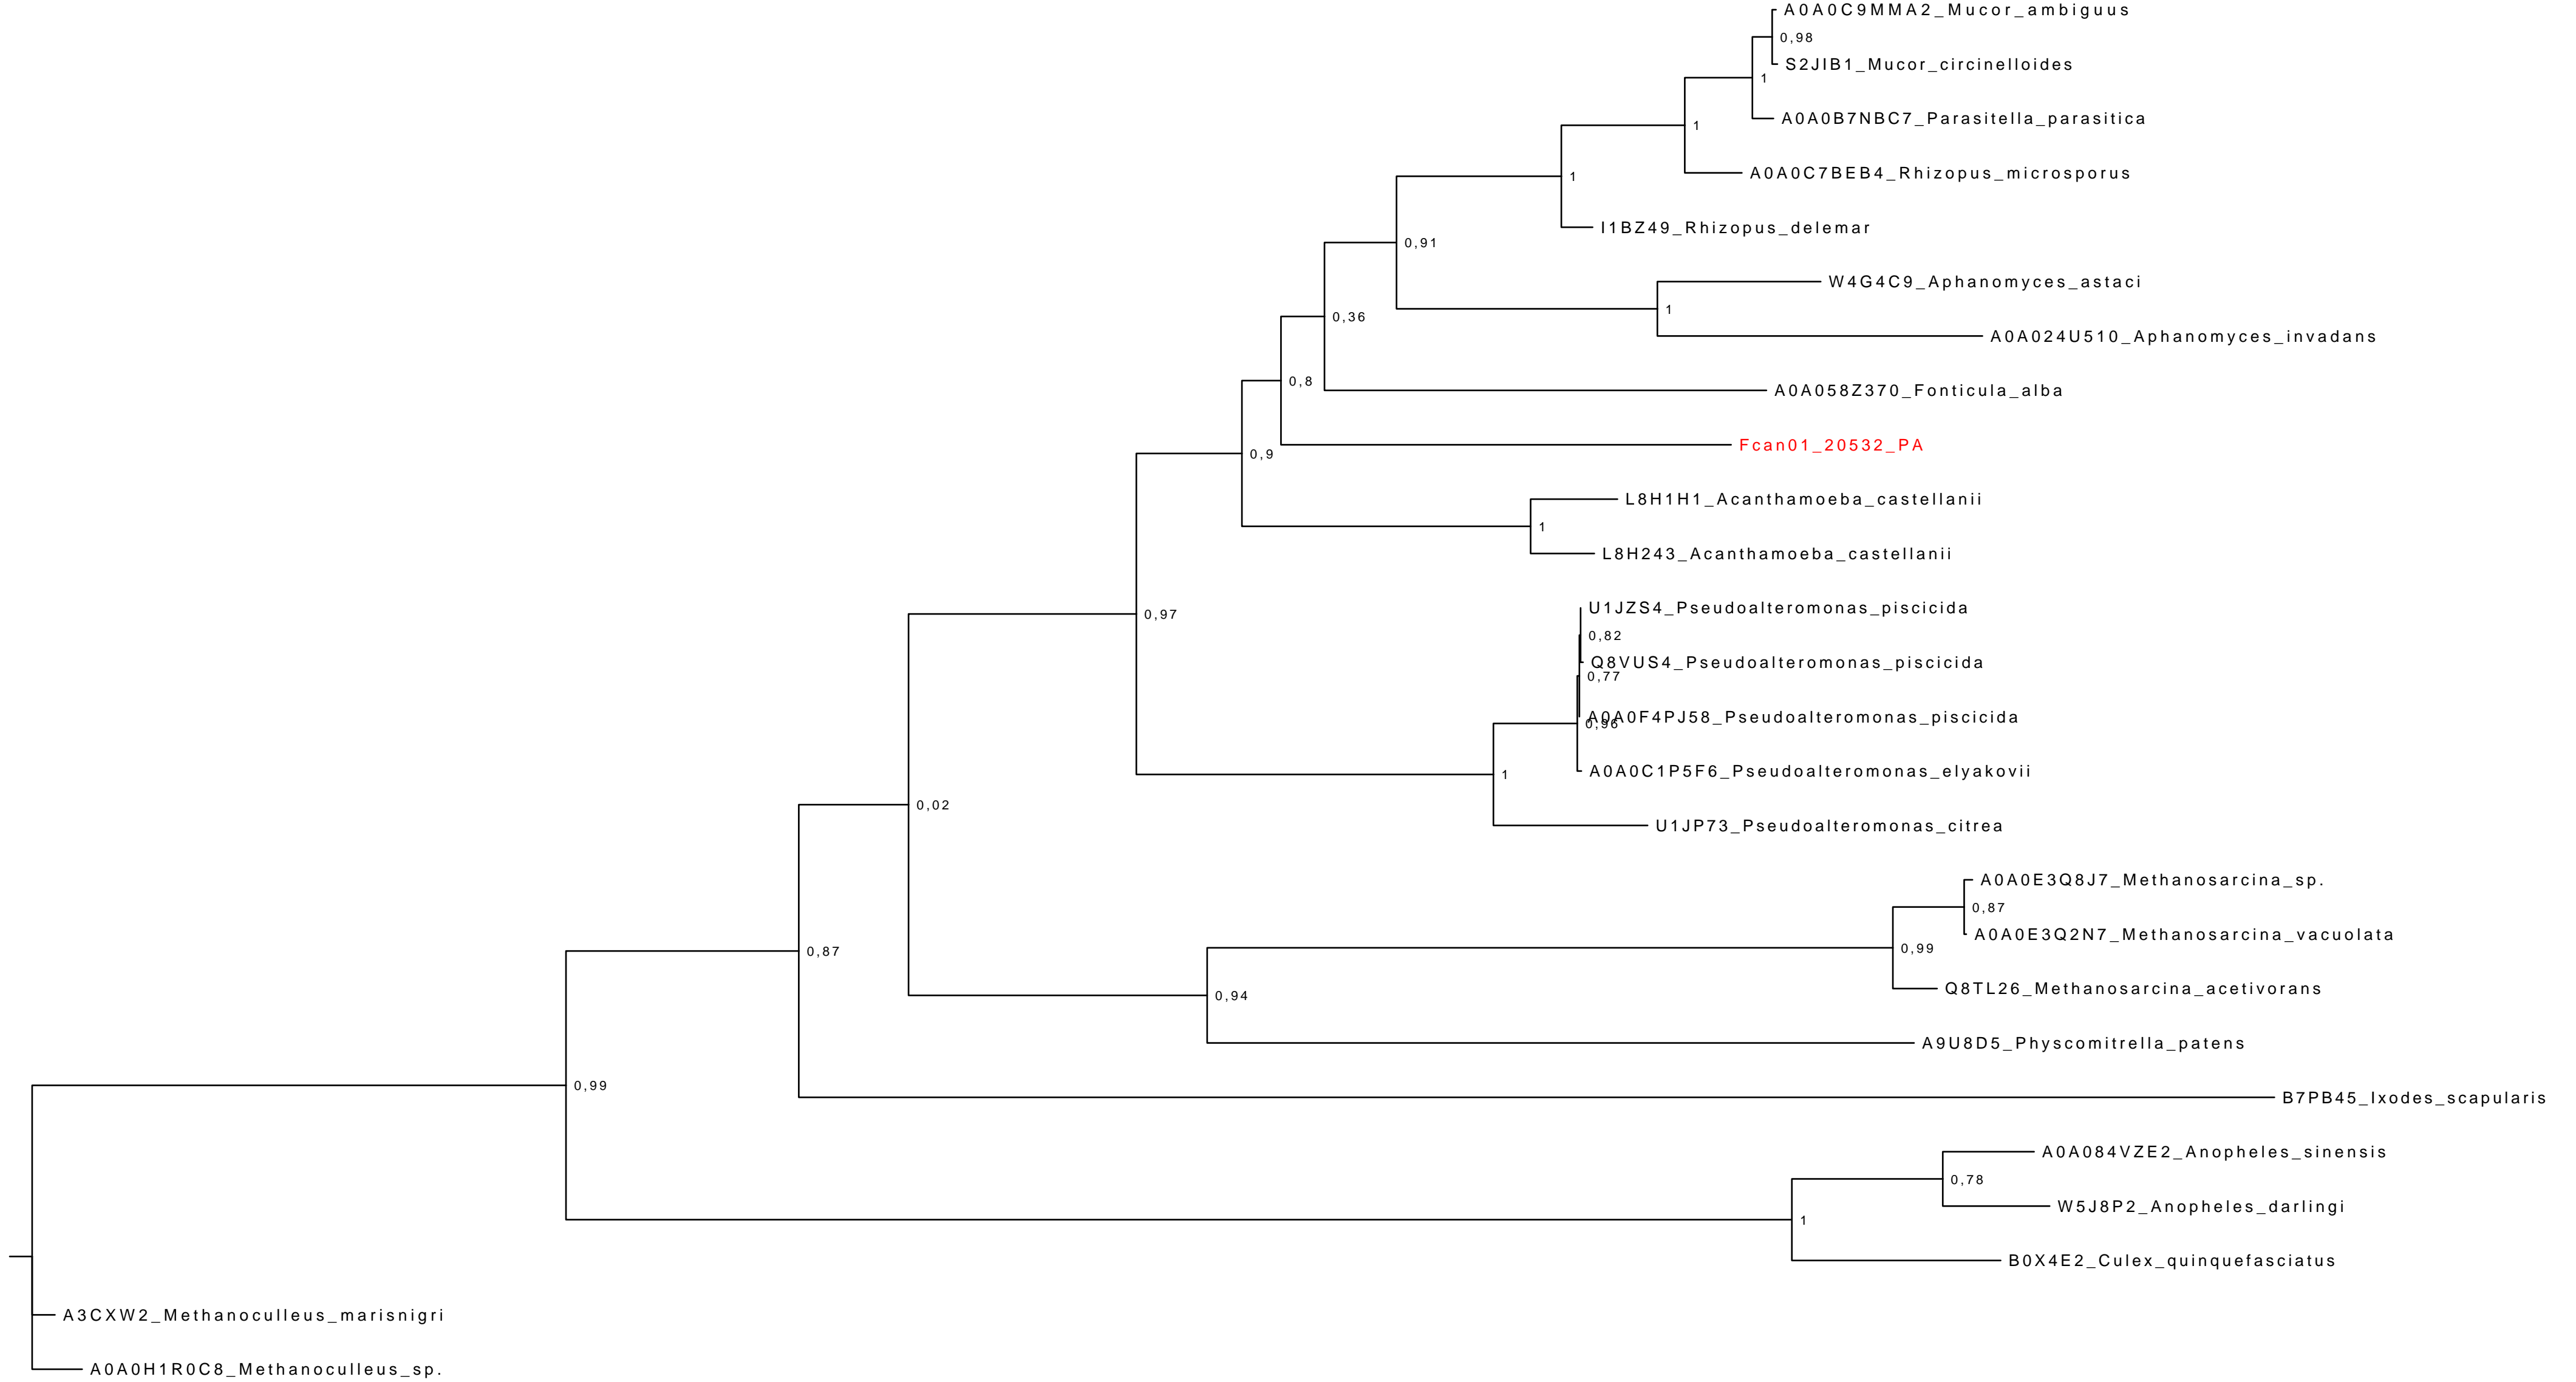

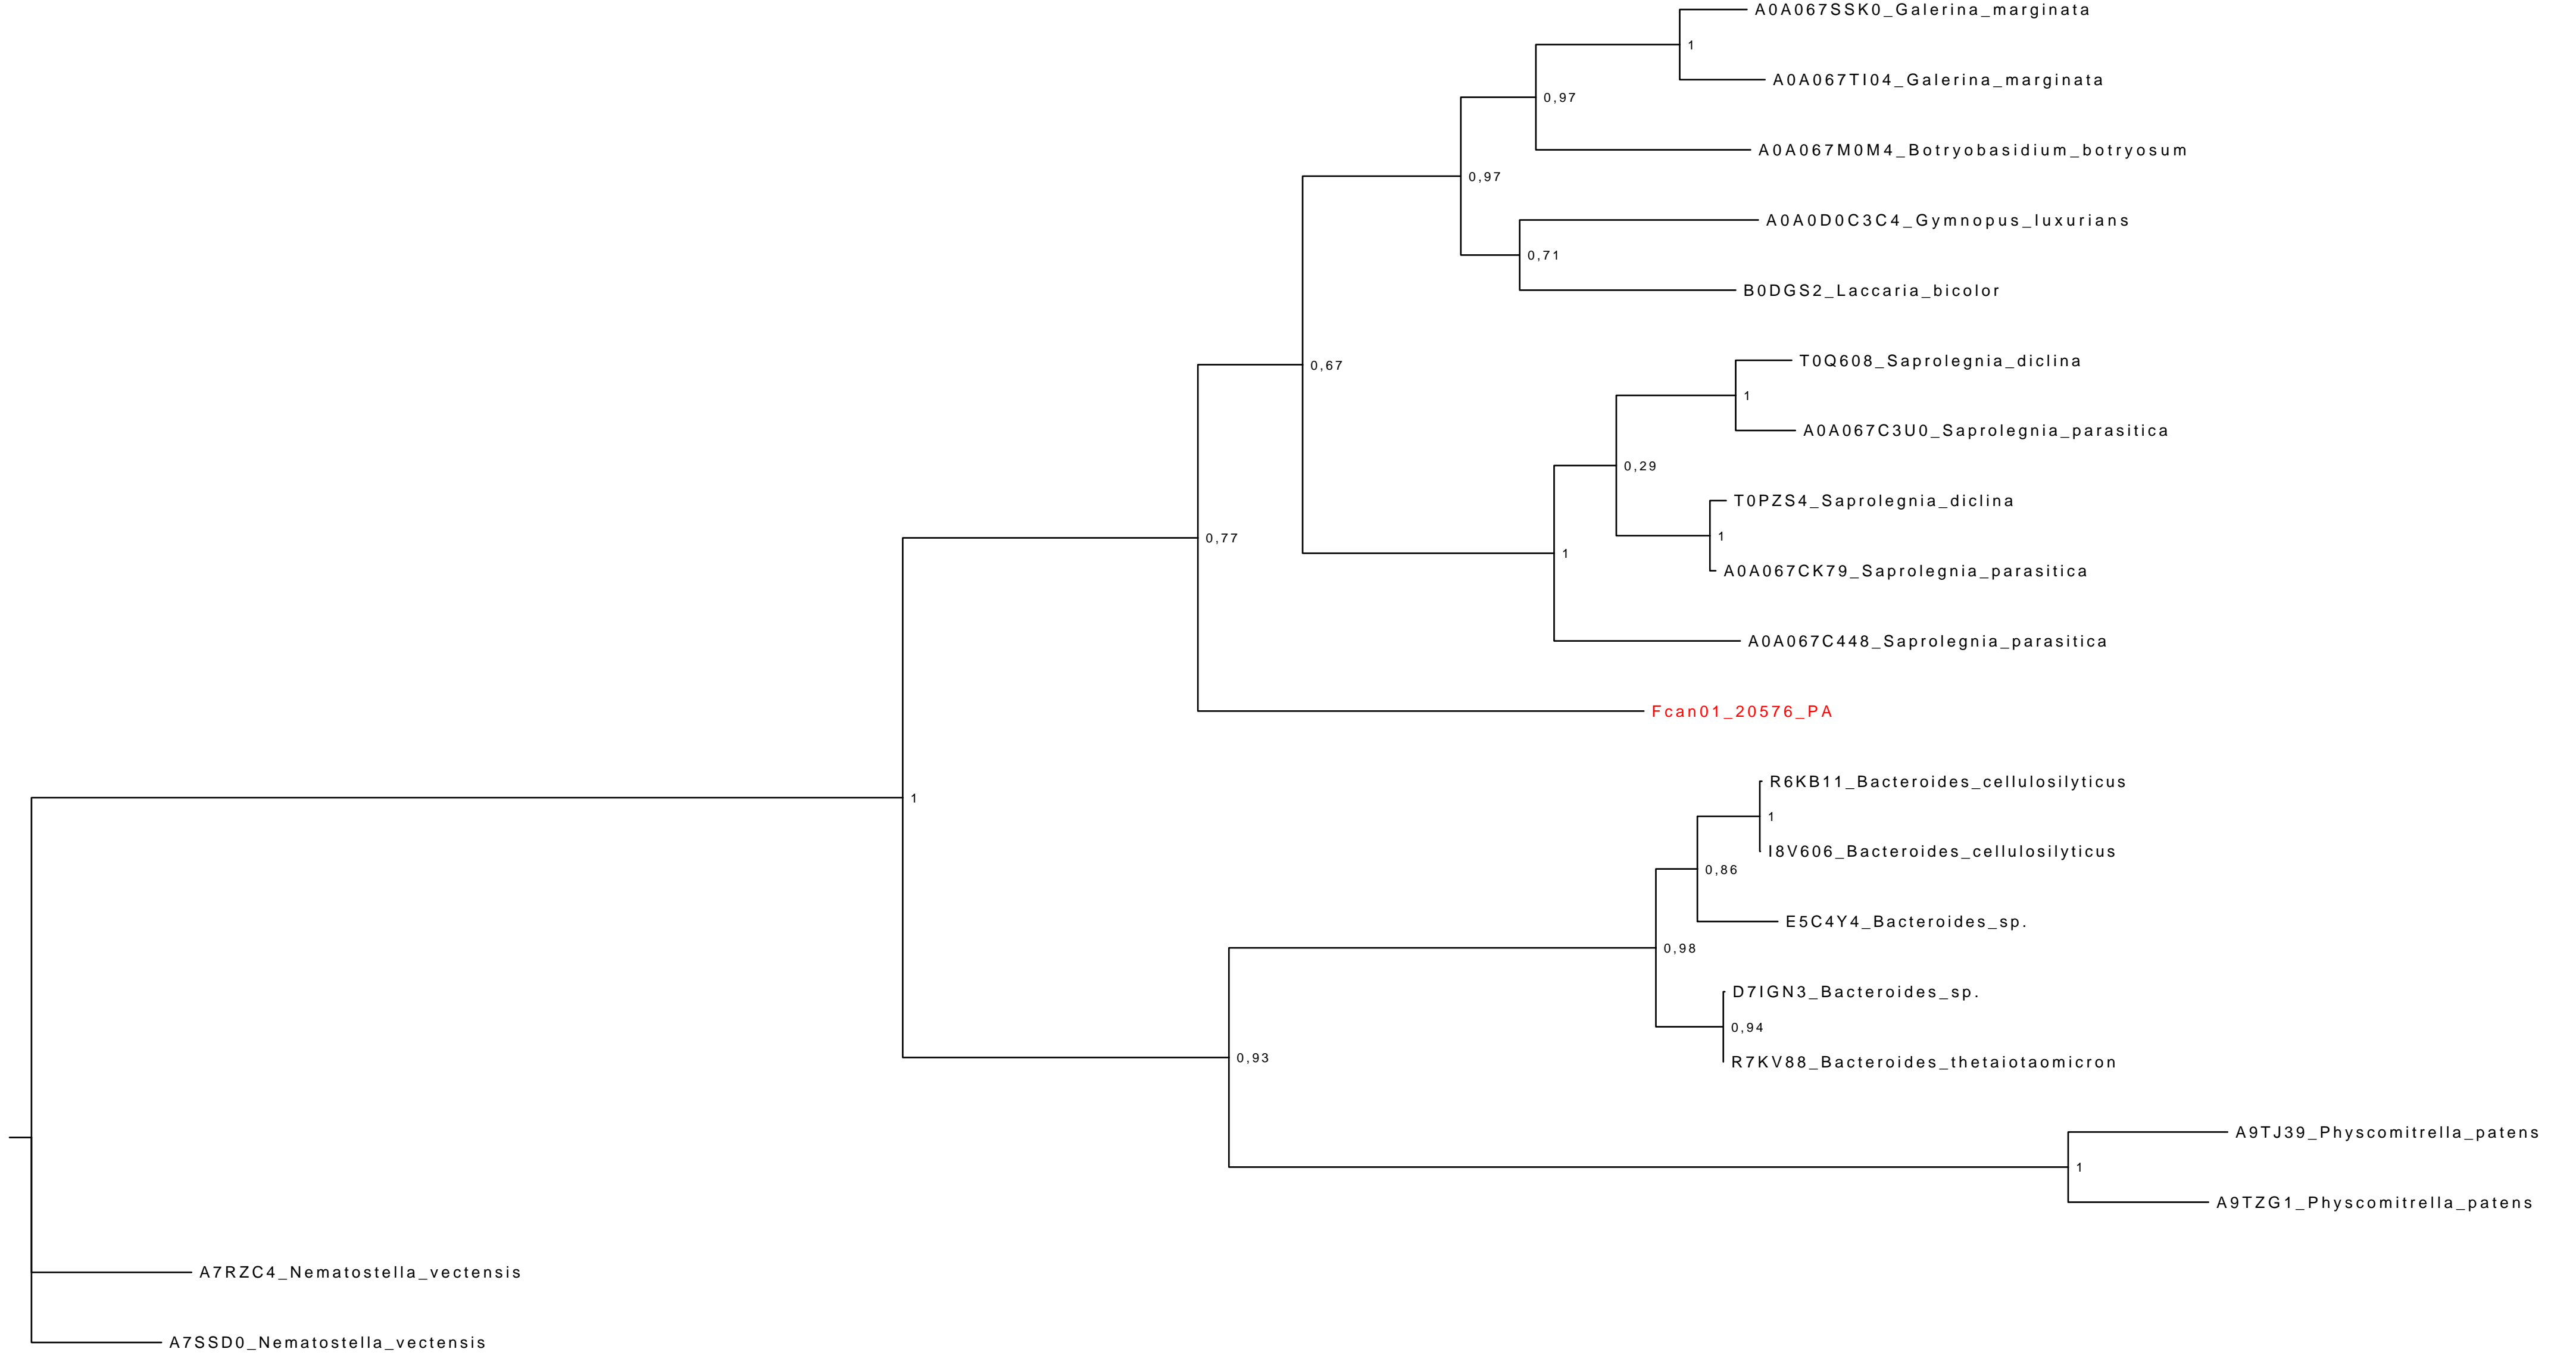

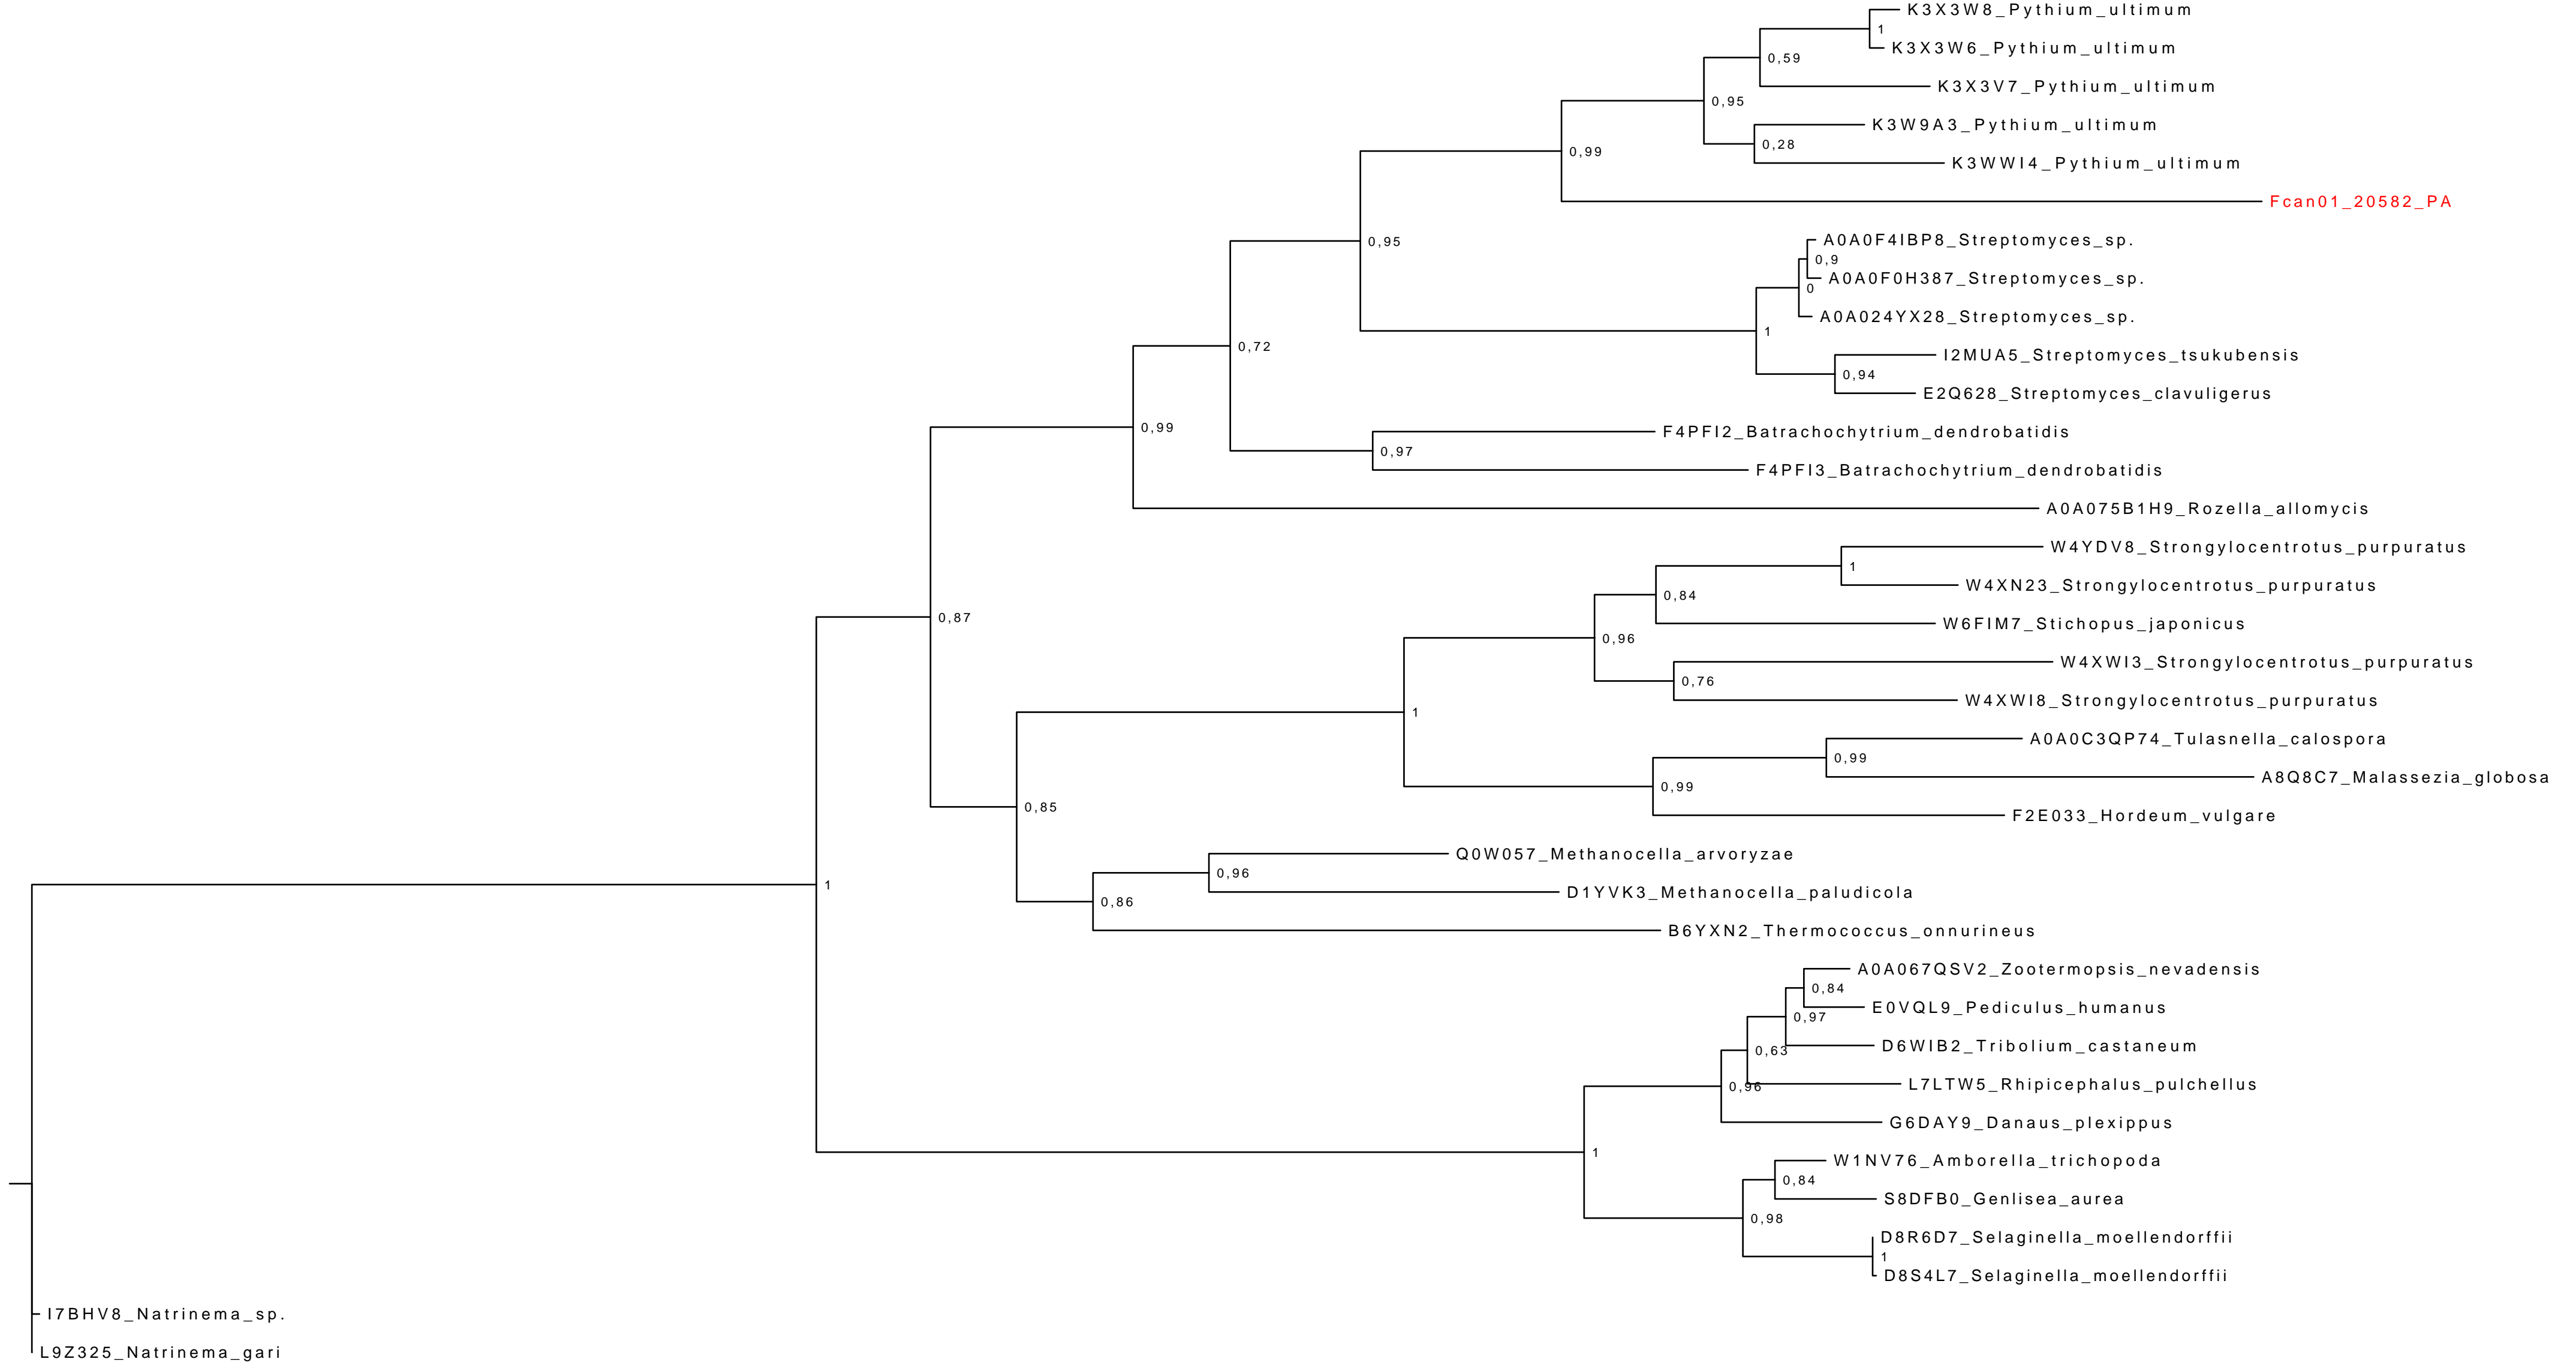



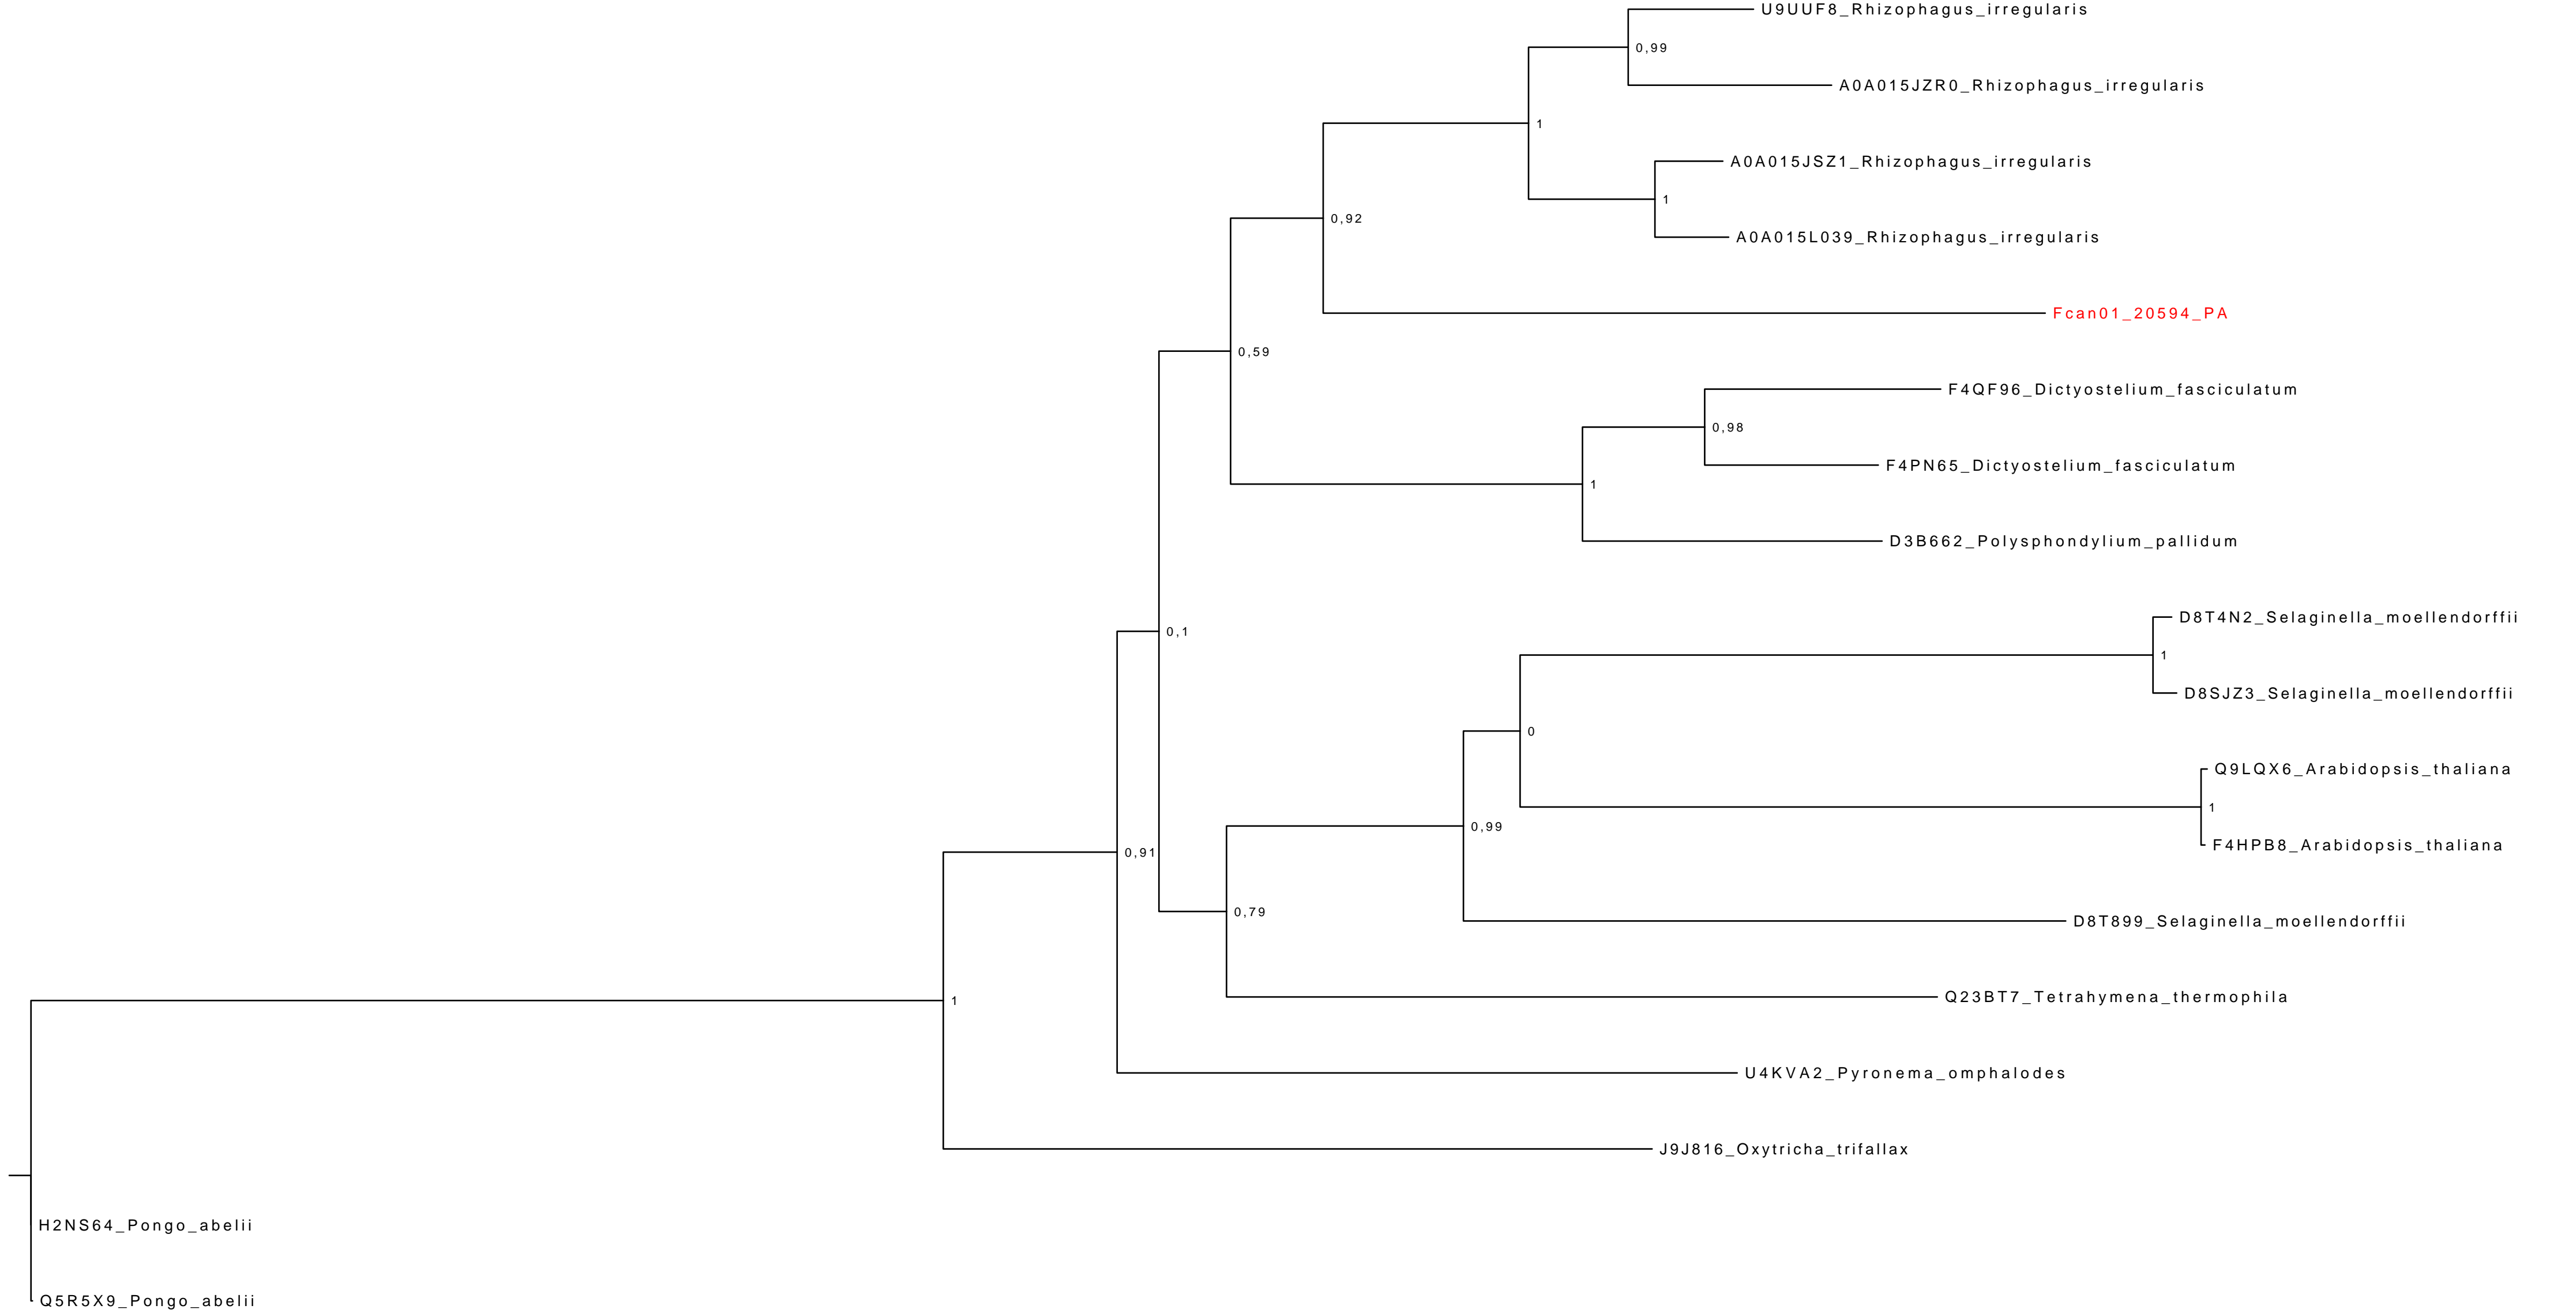

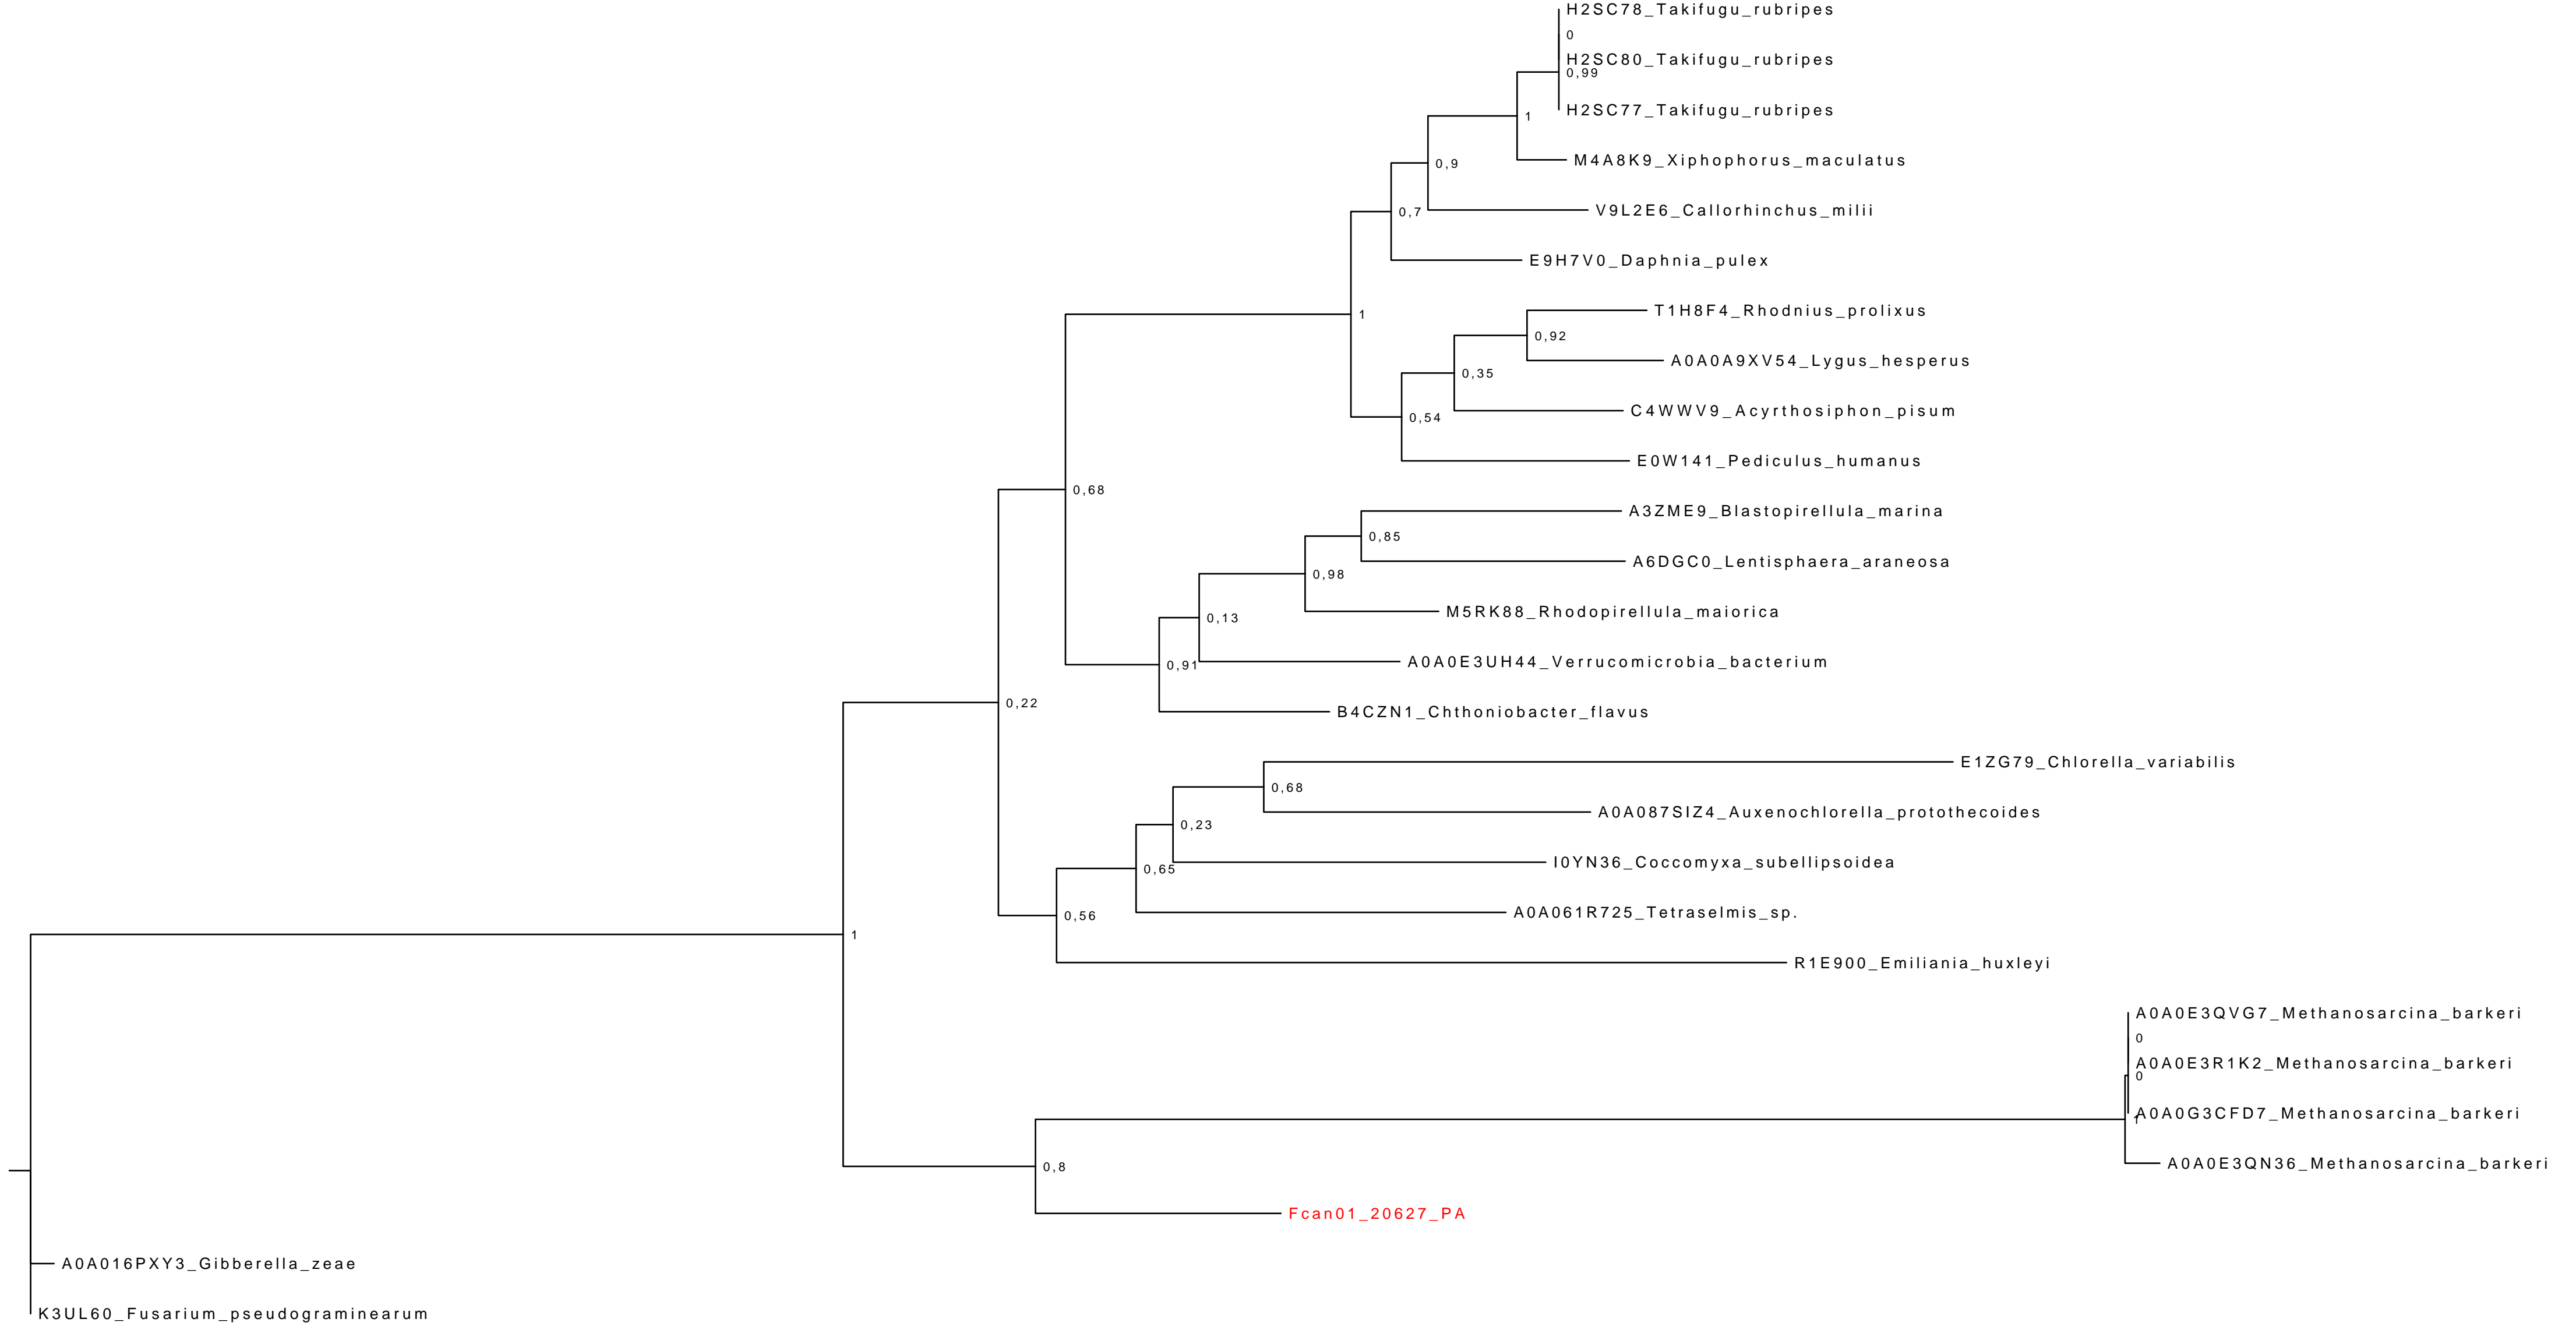

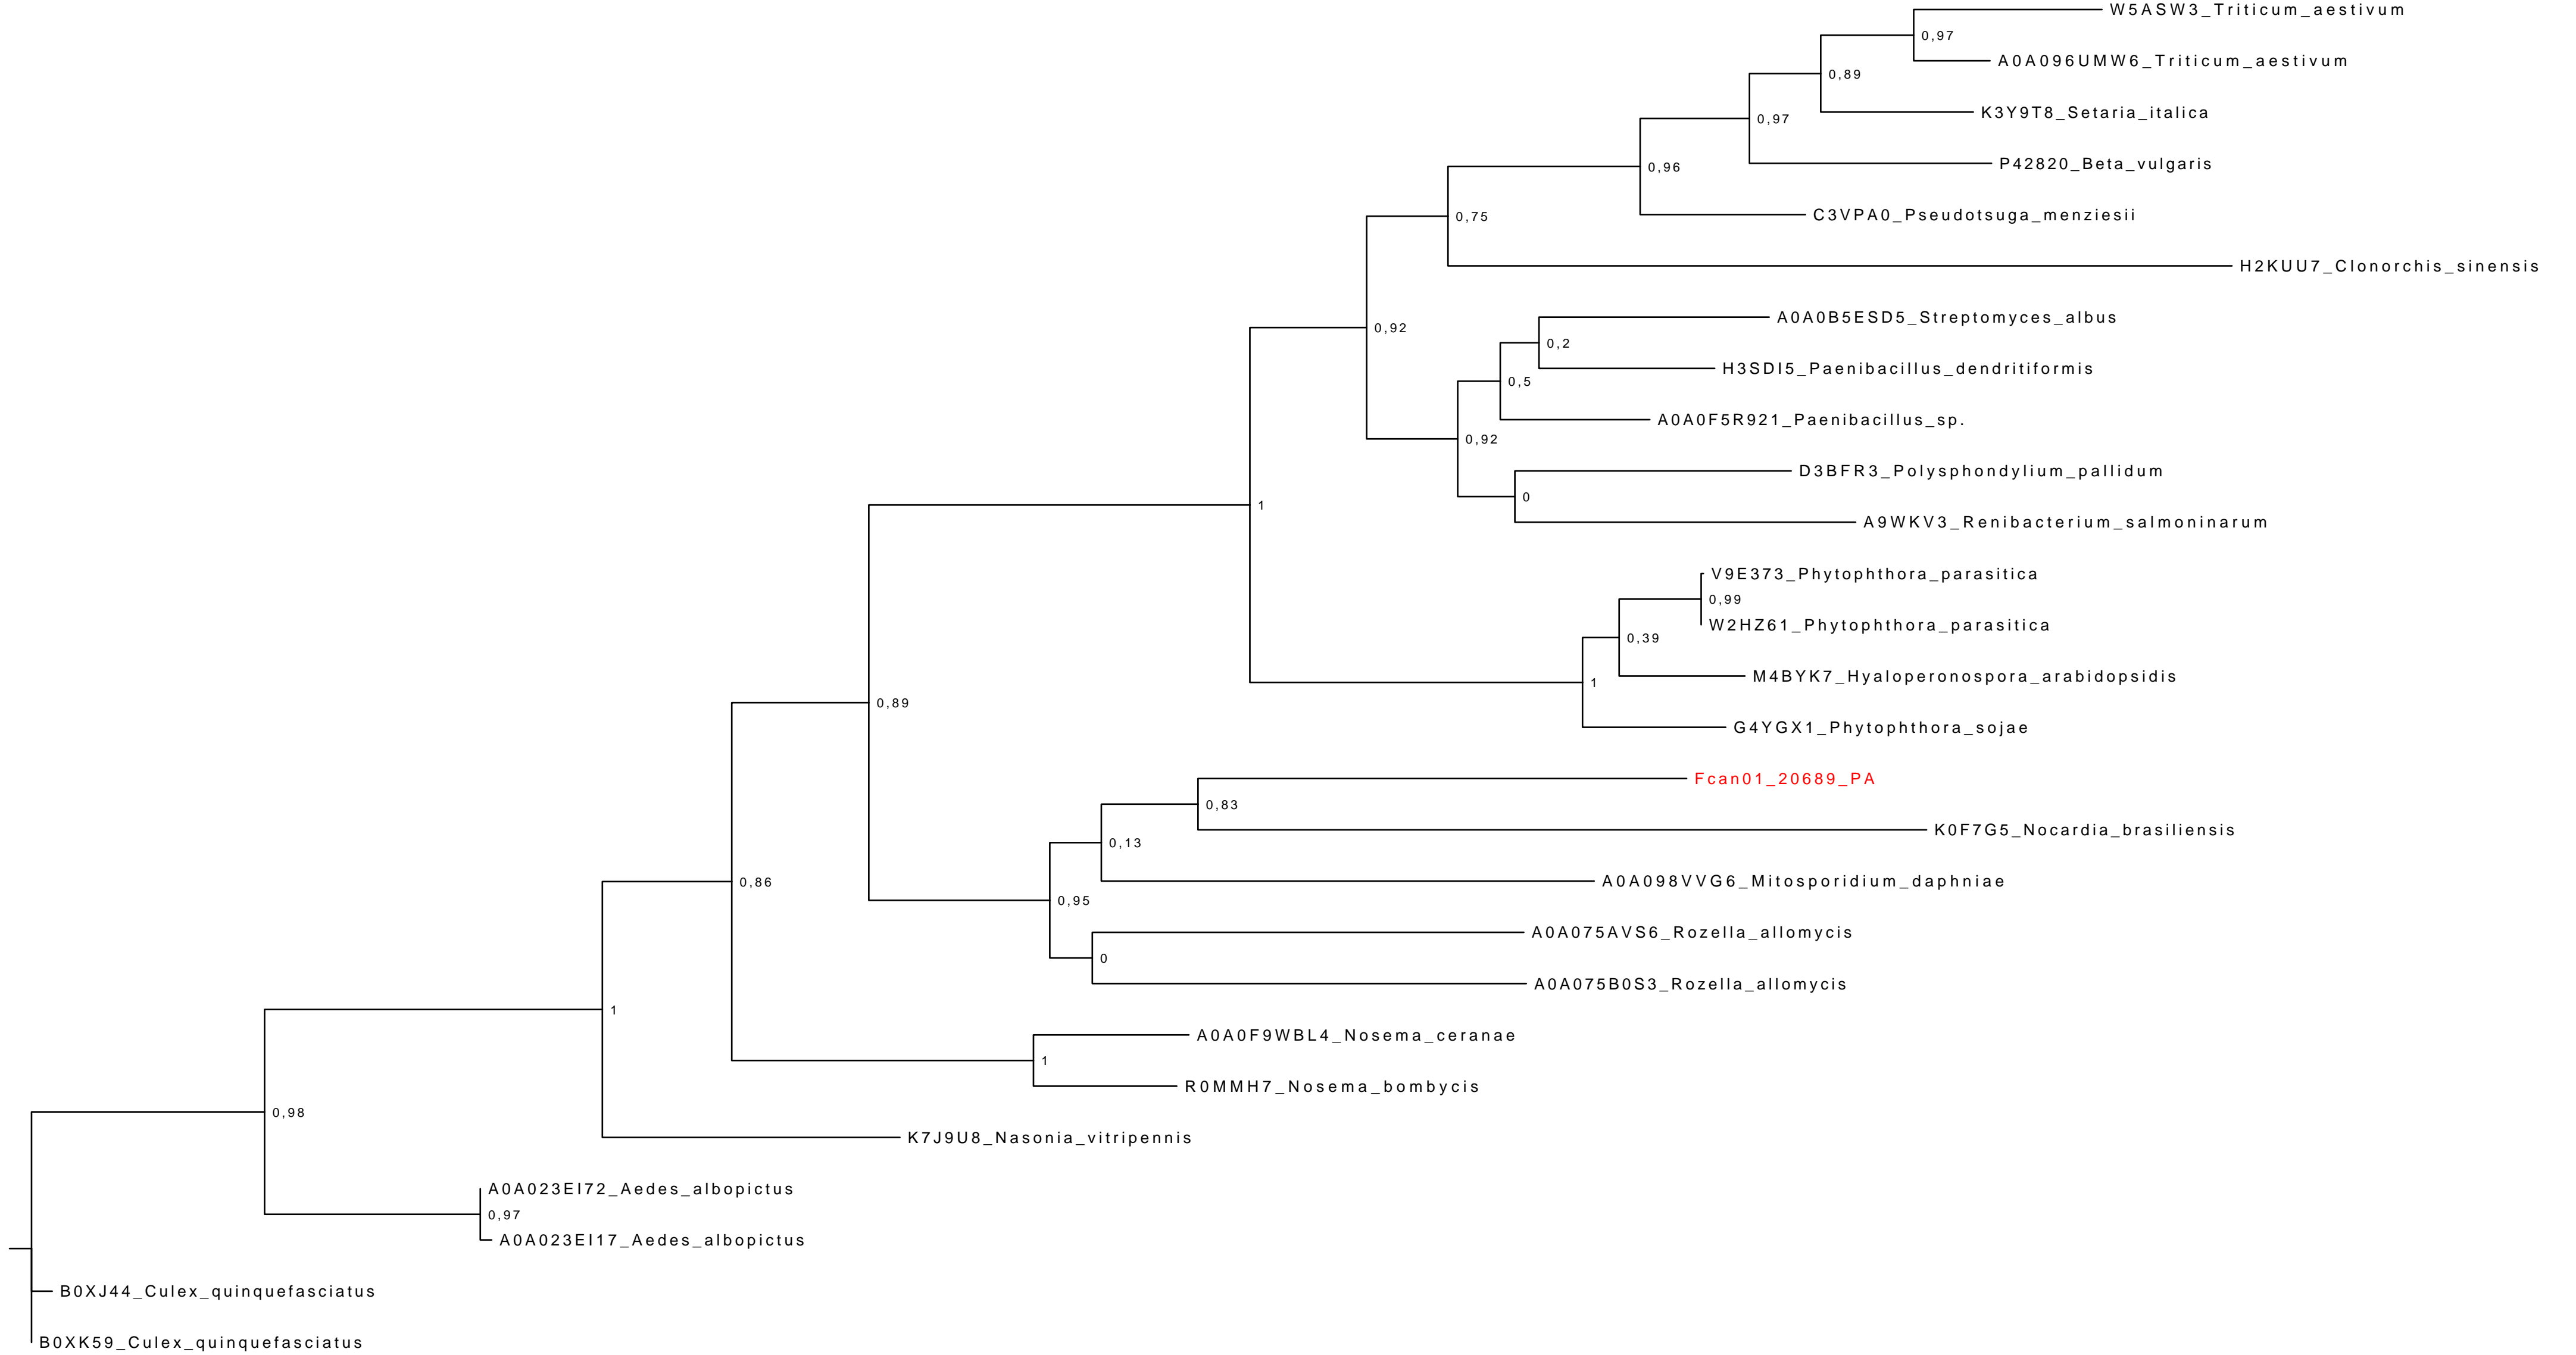

0.4

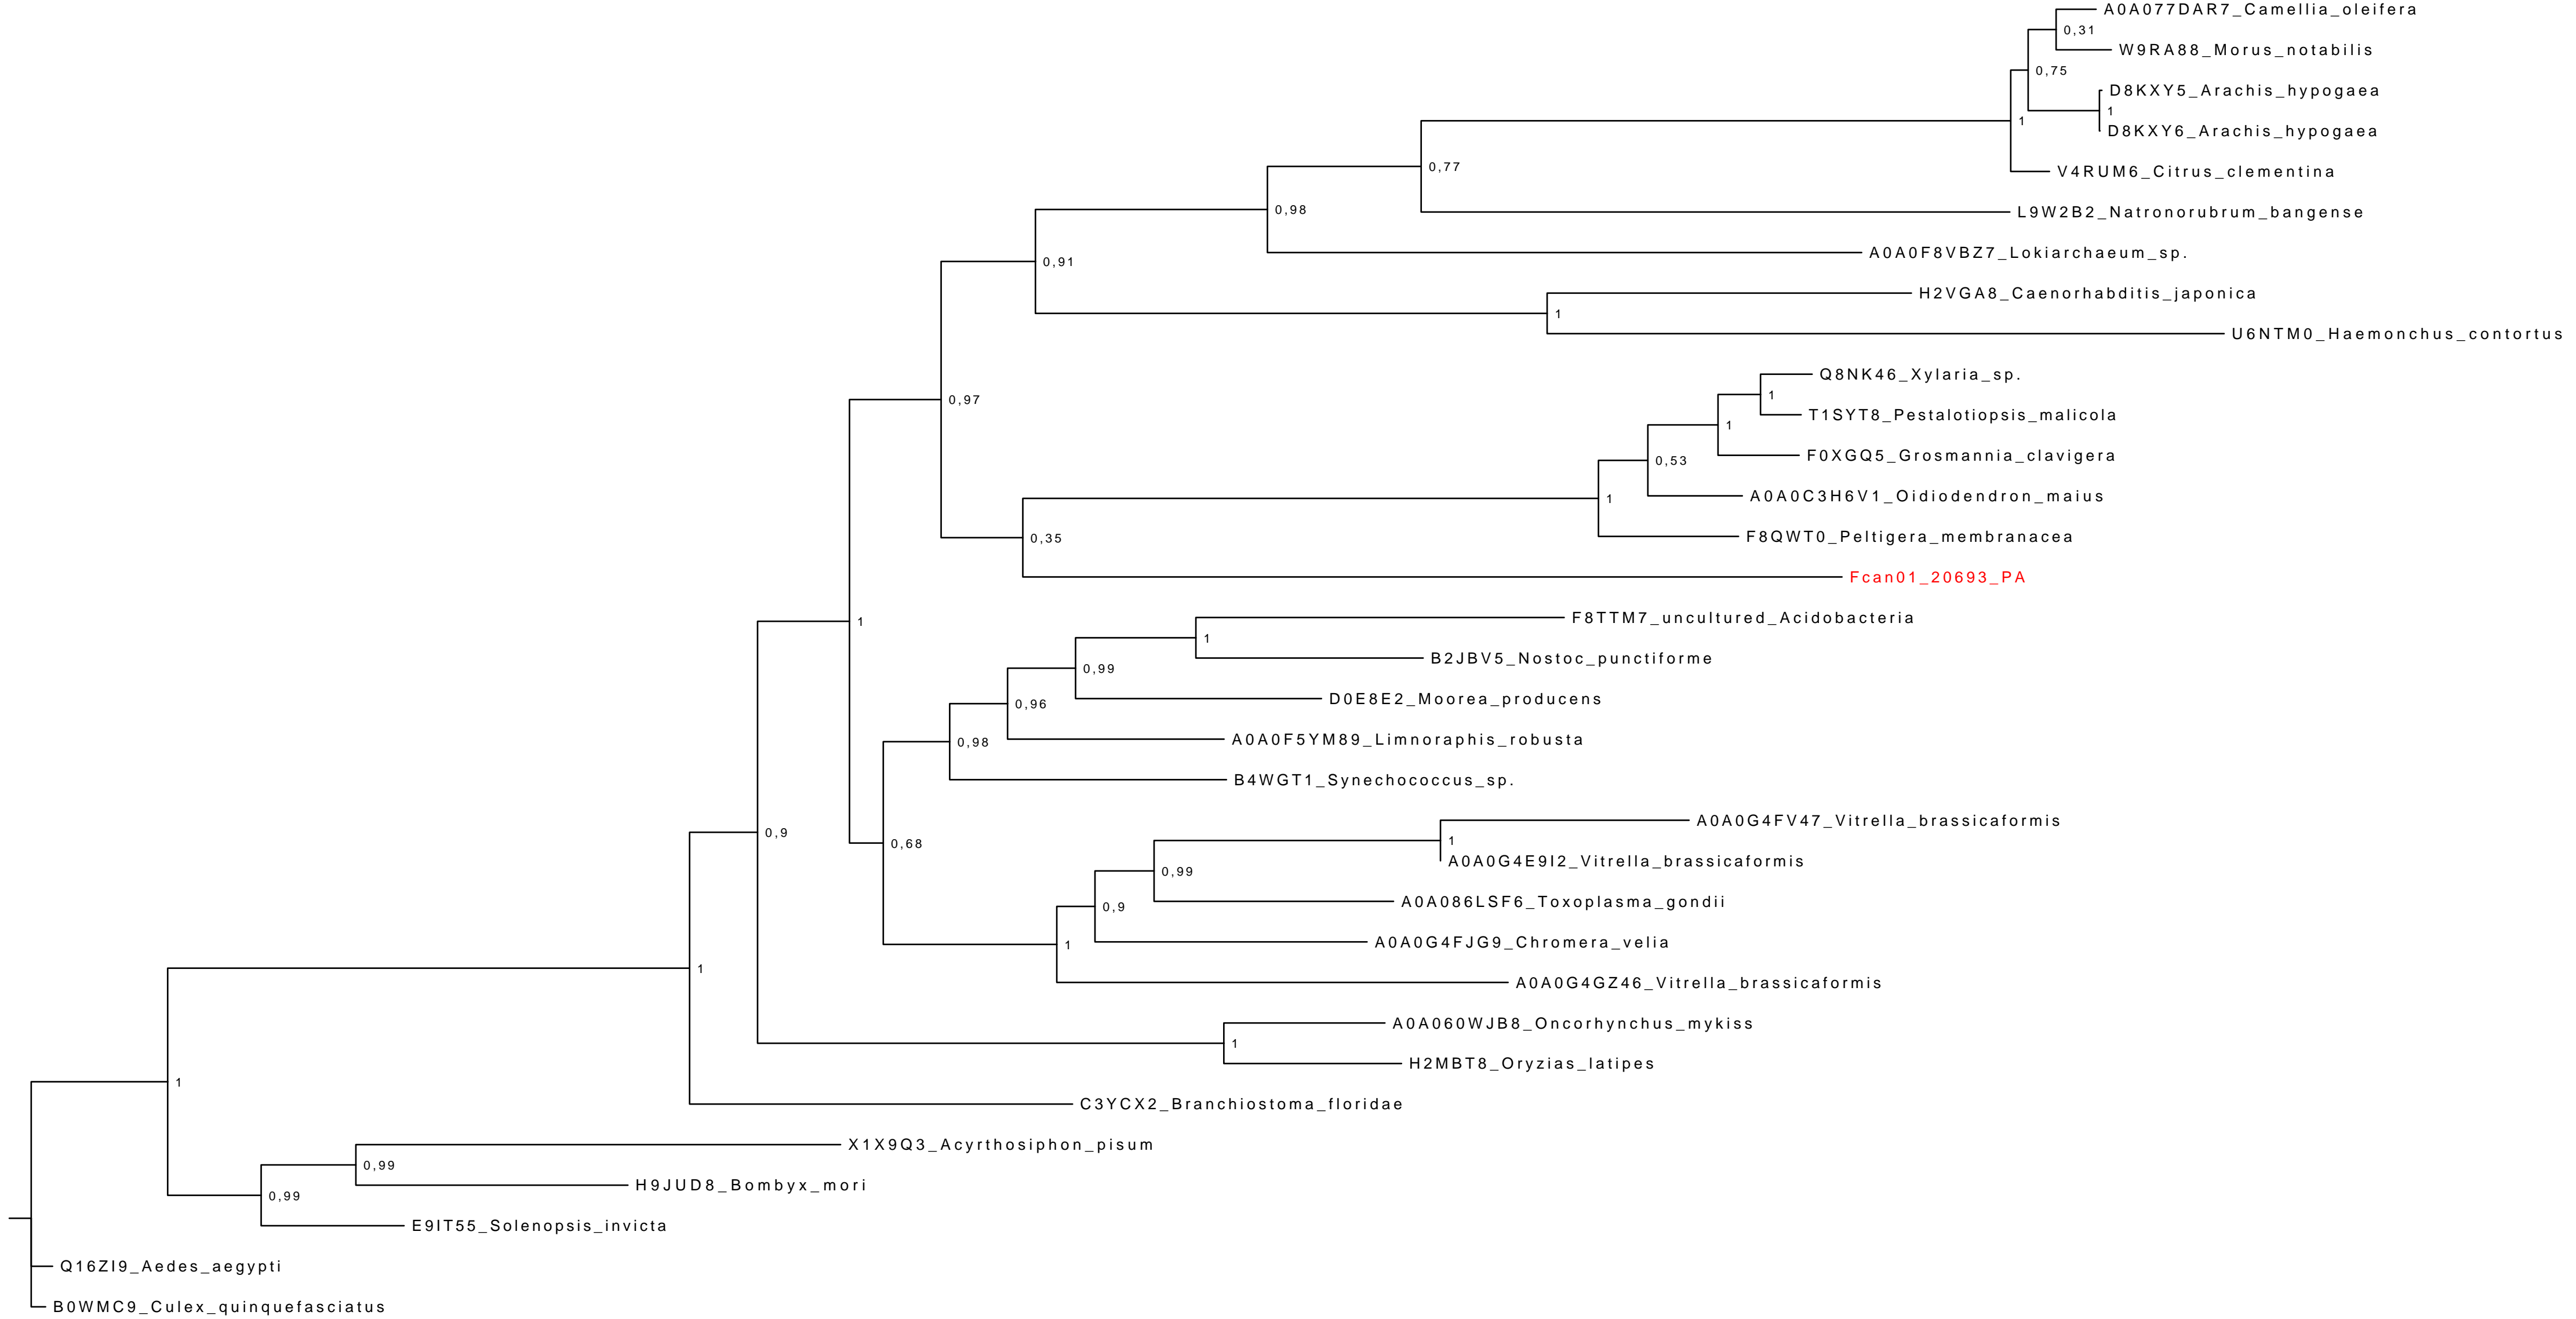

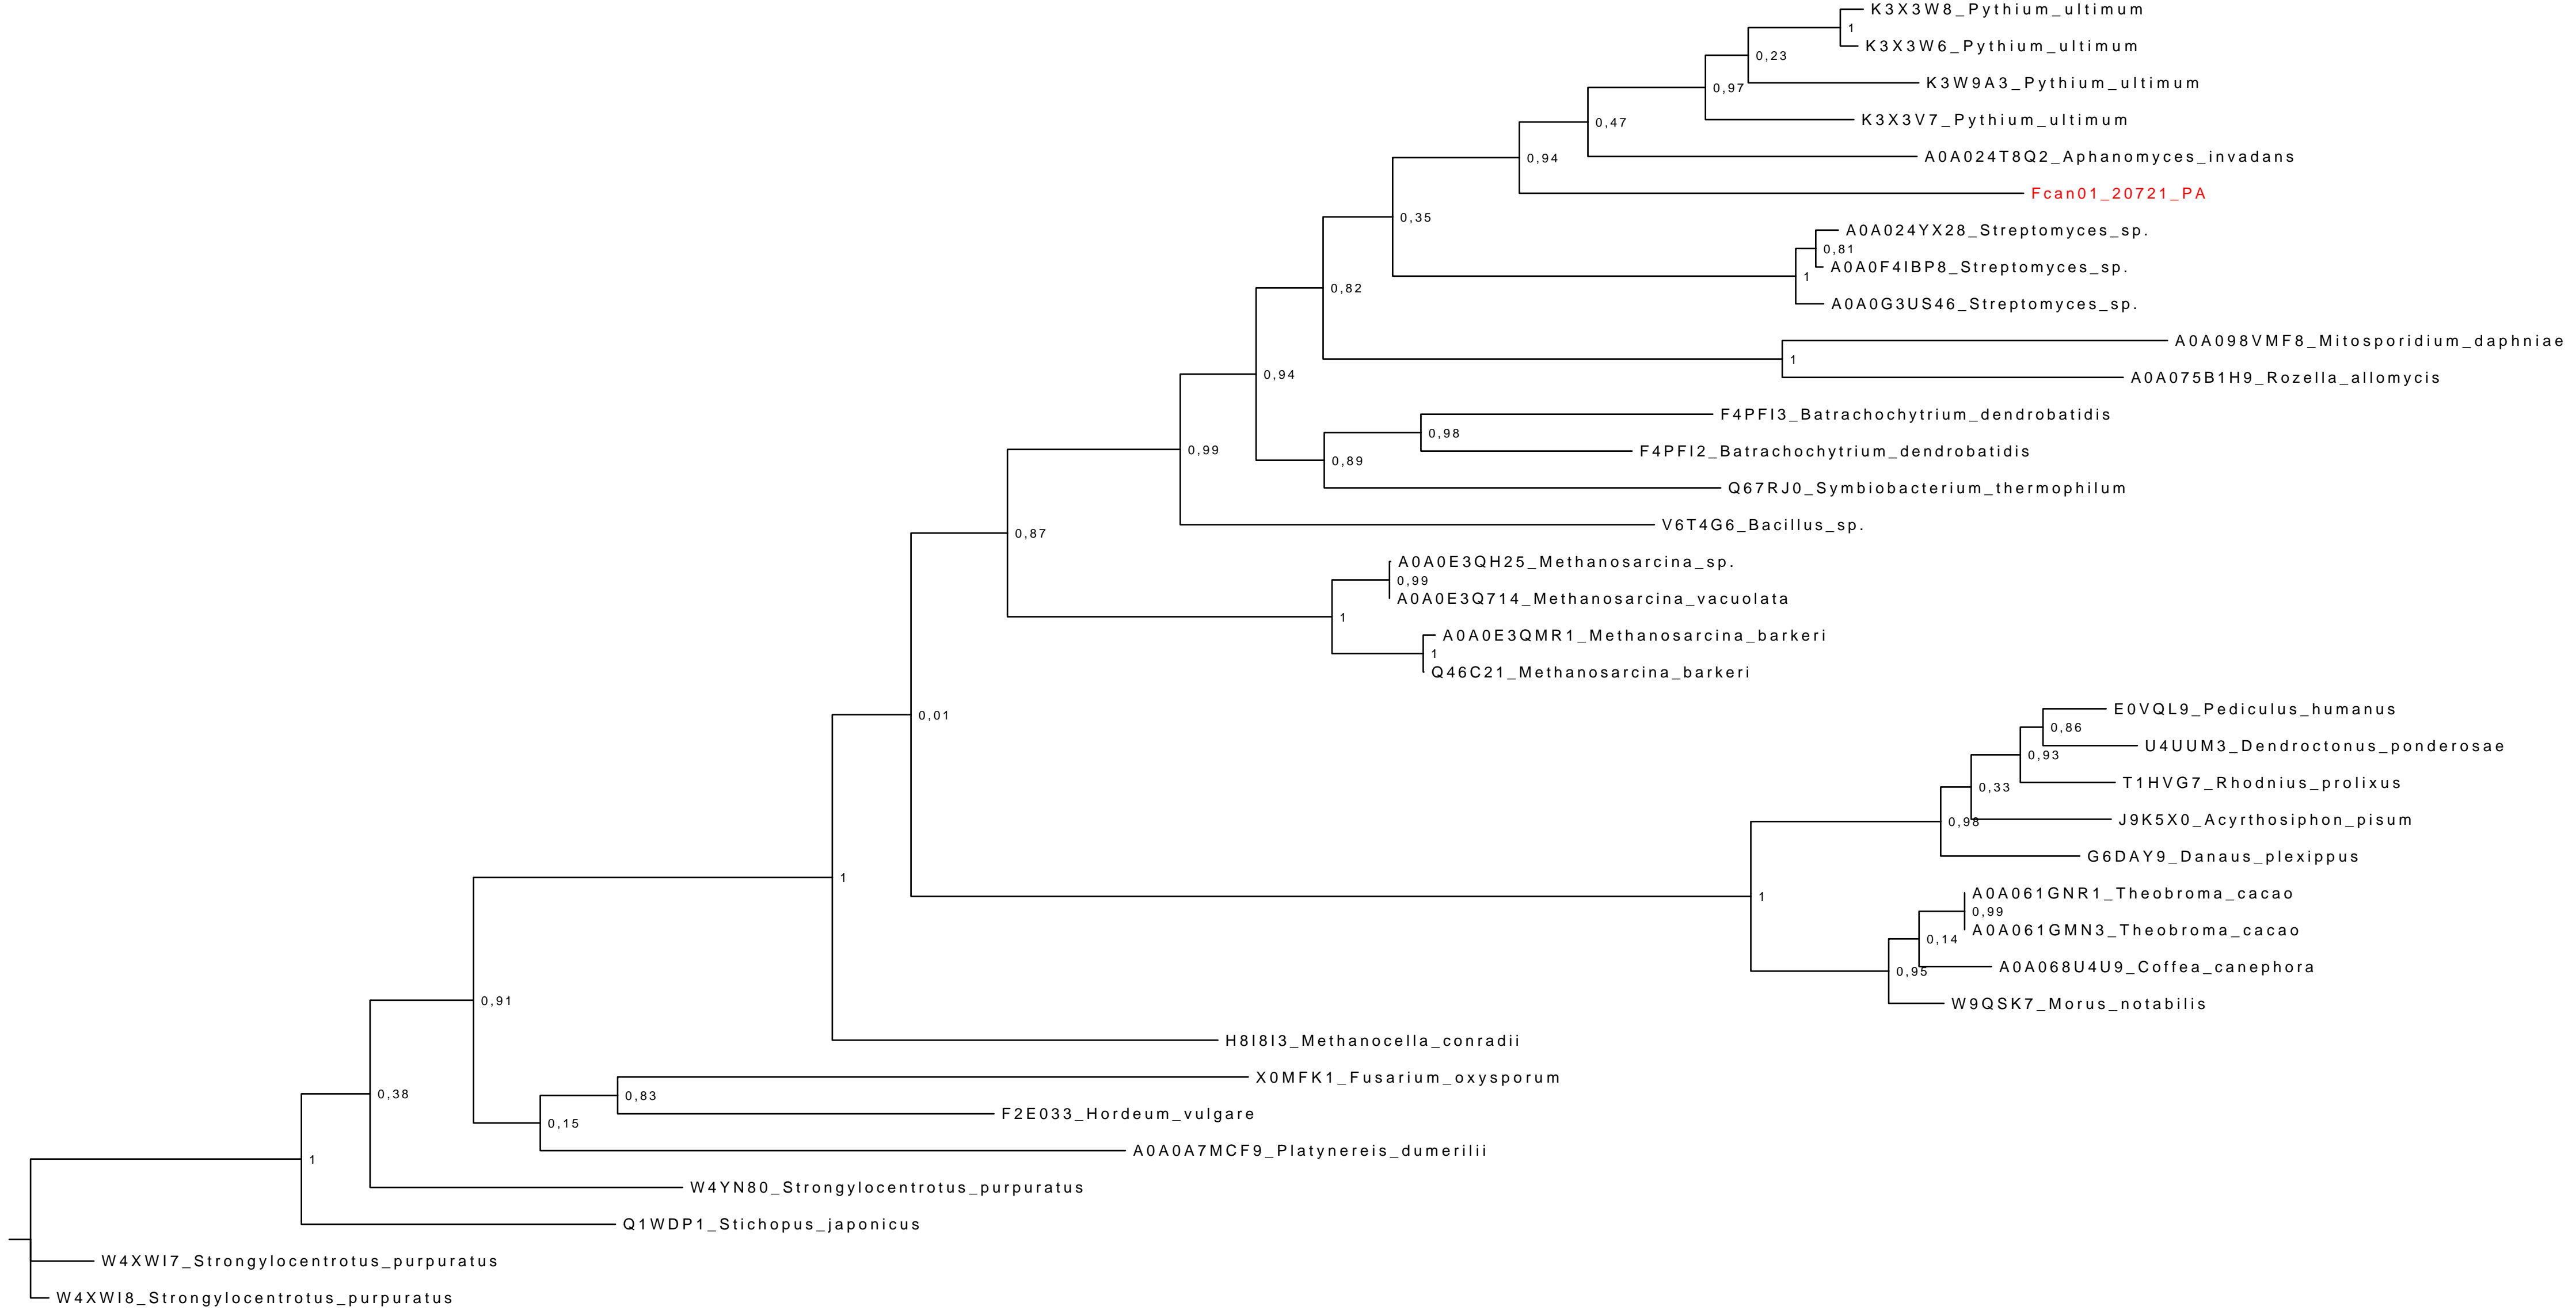

0.5

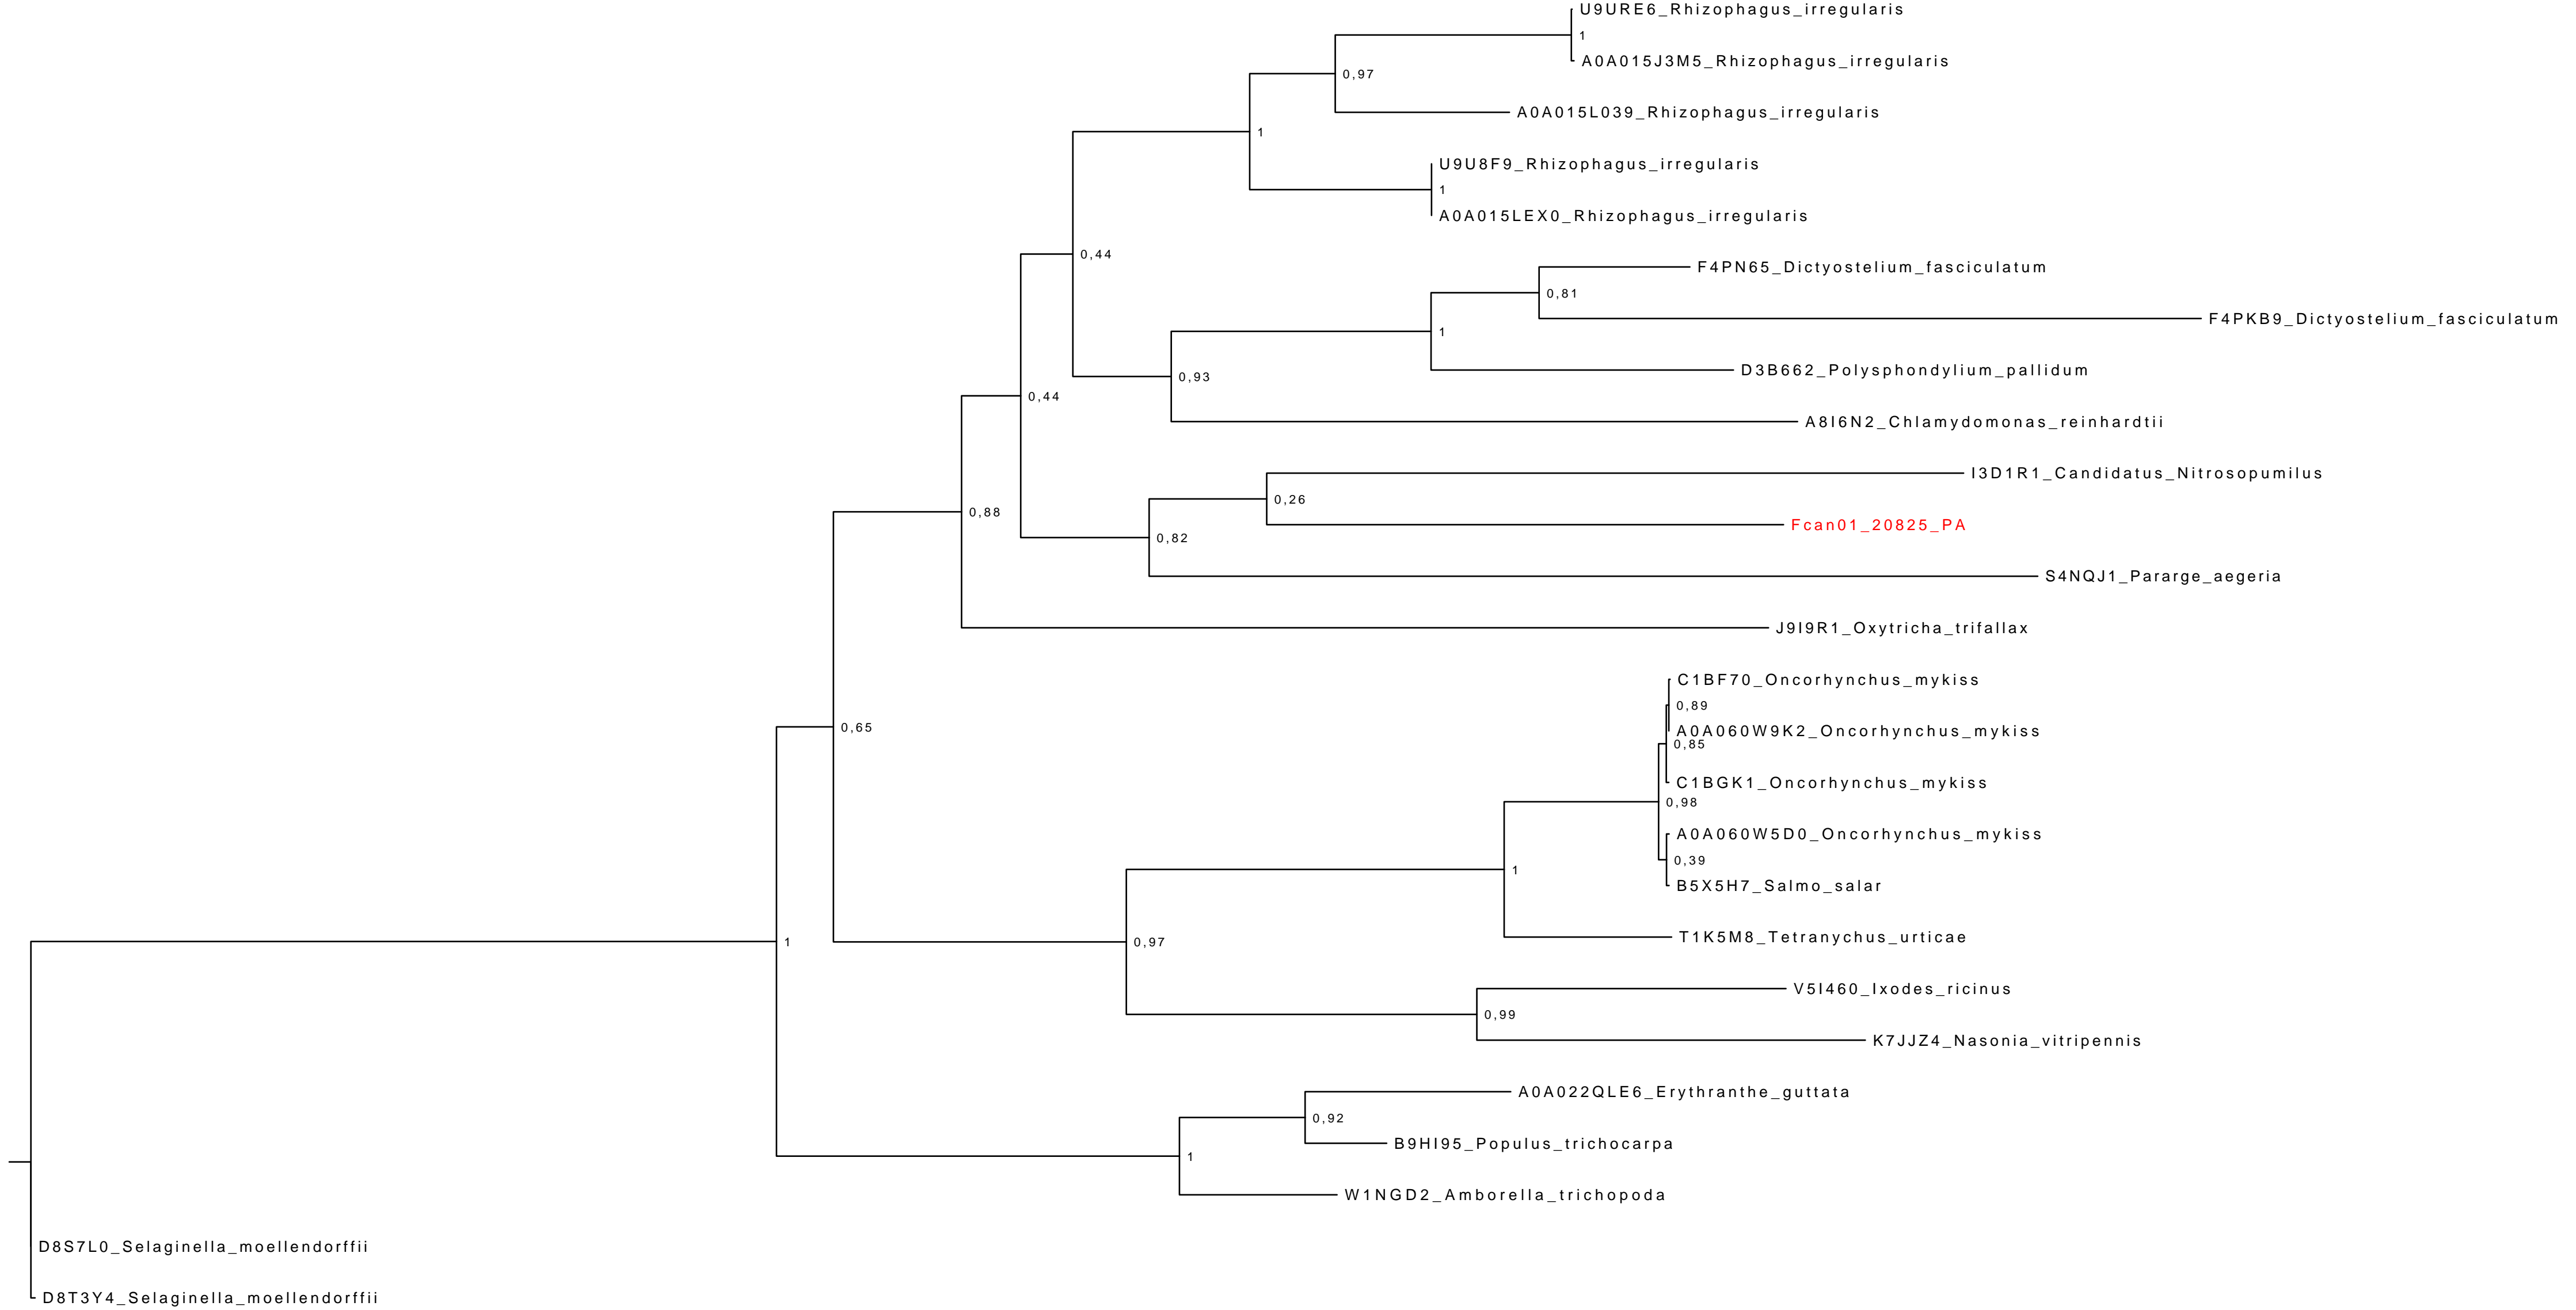

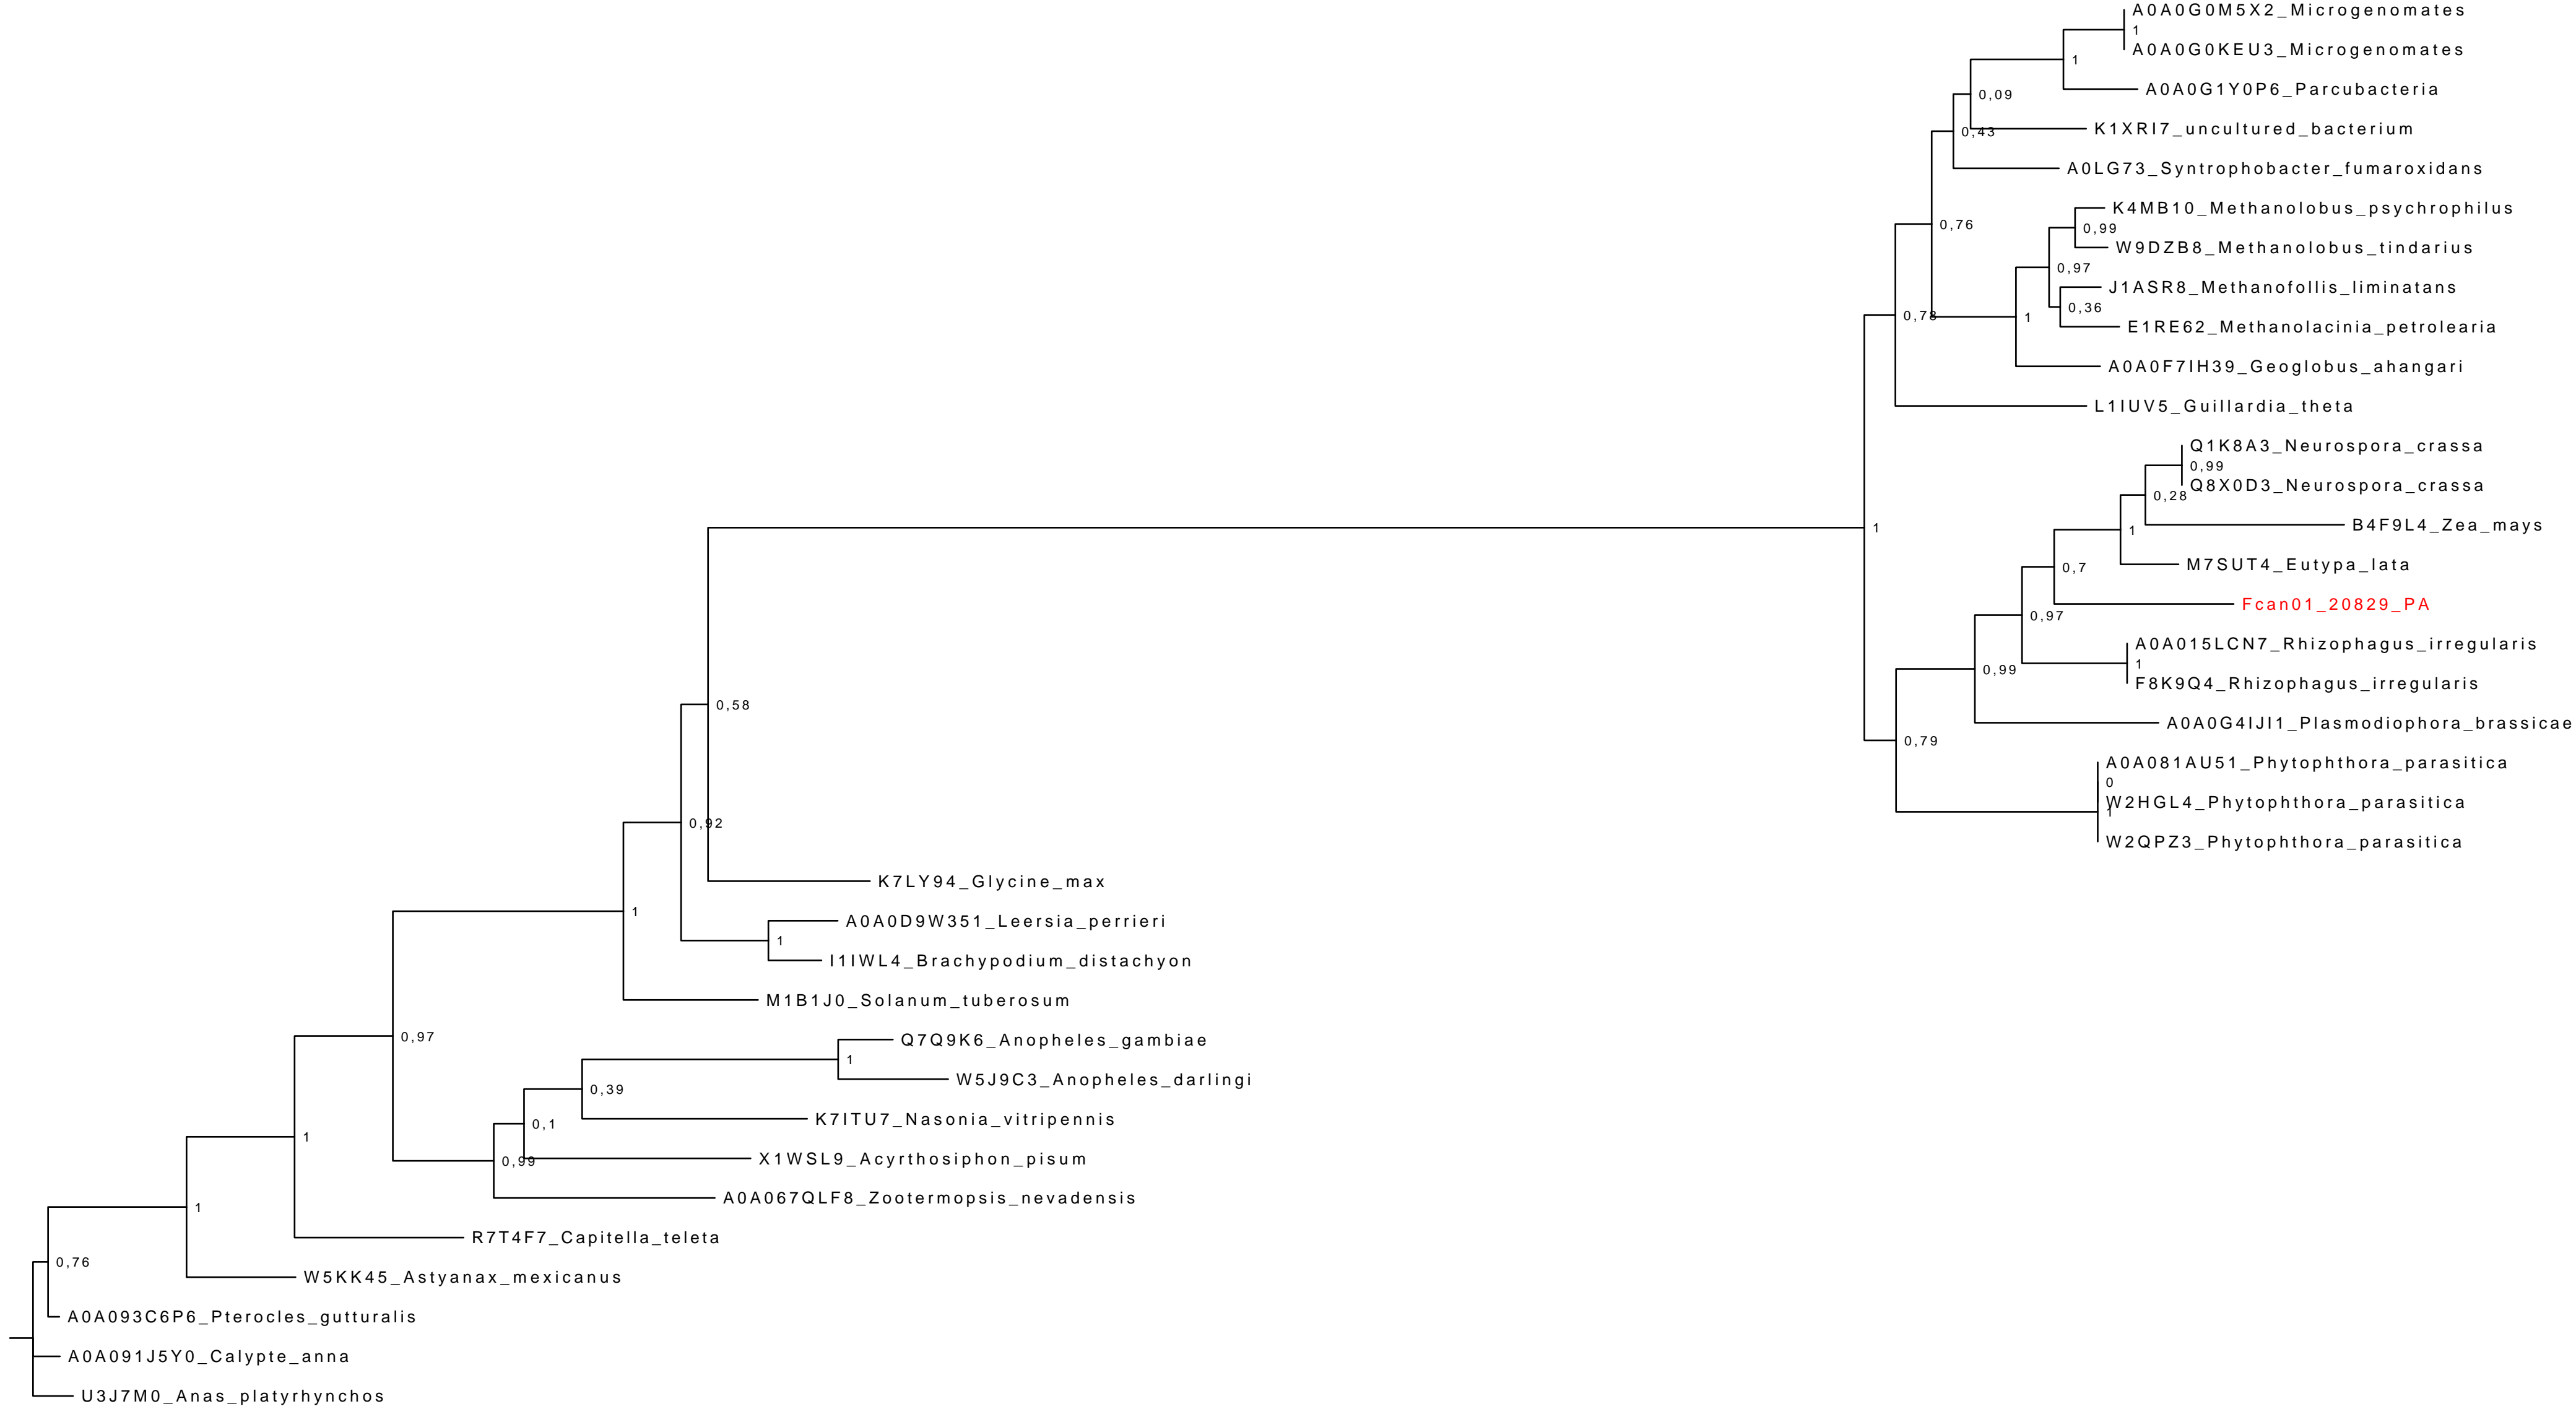

0.7

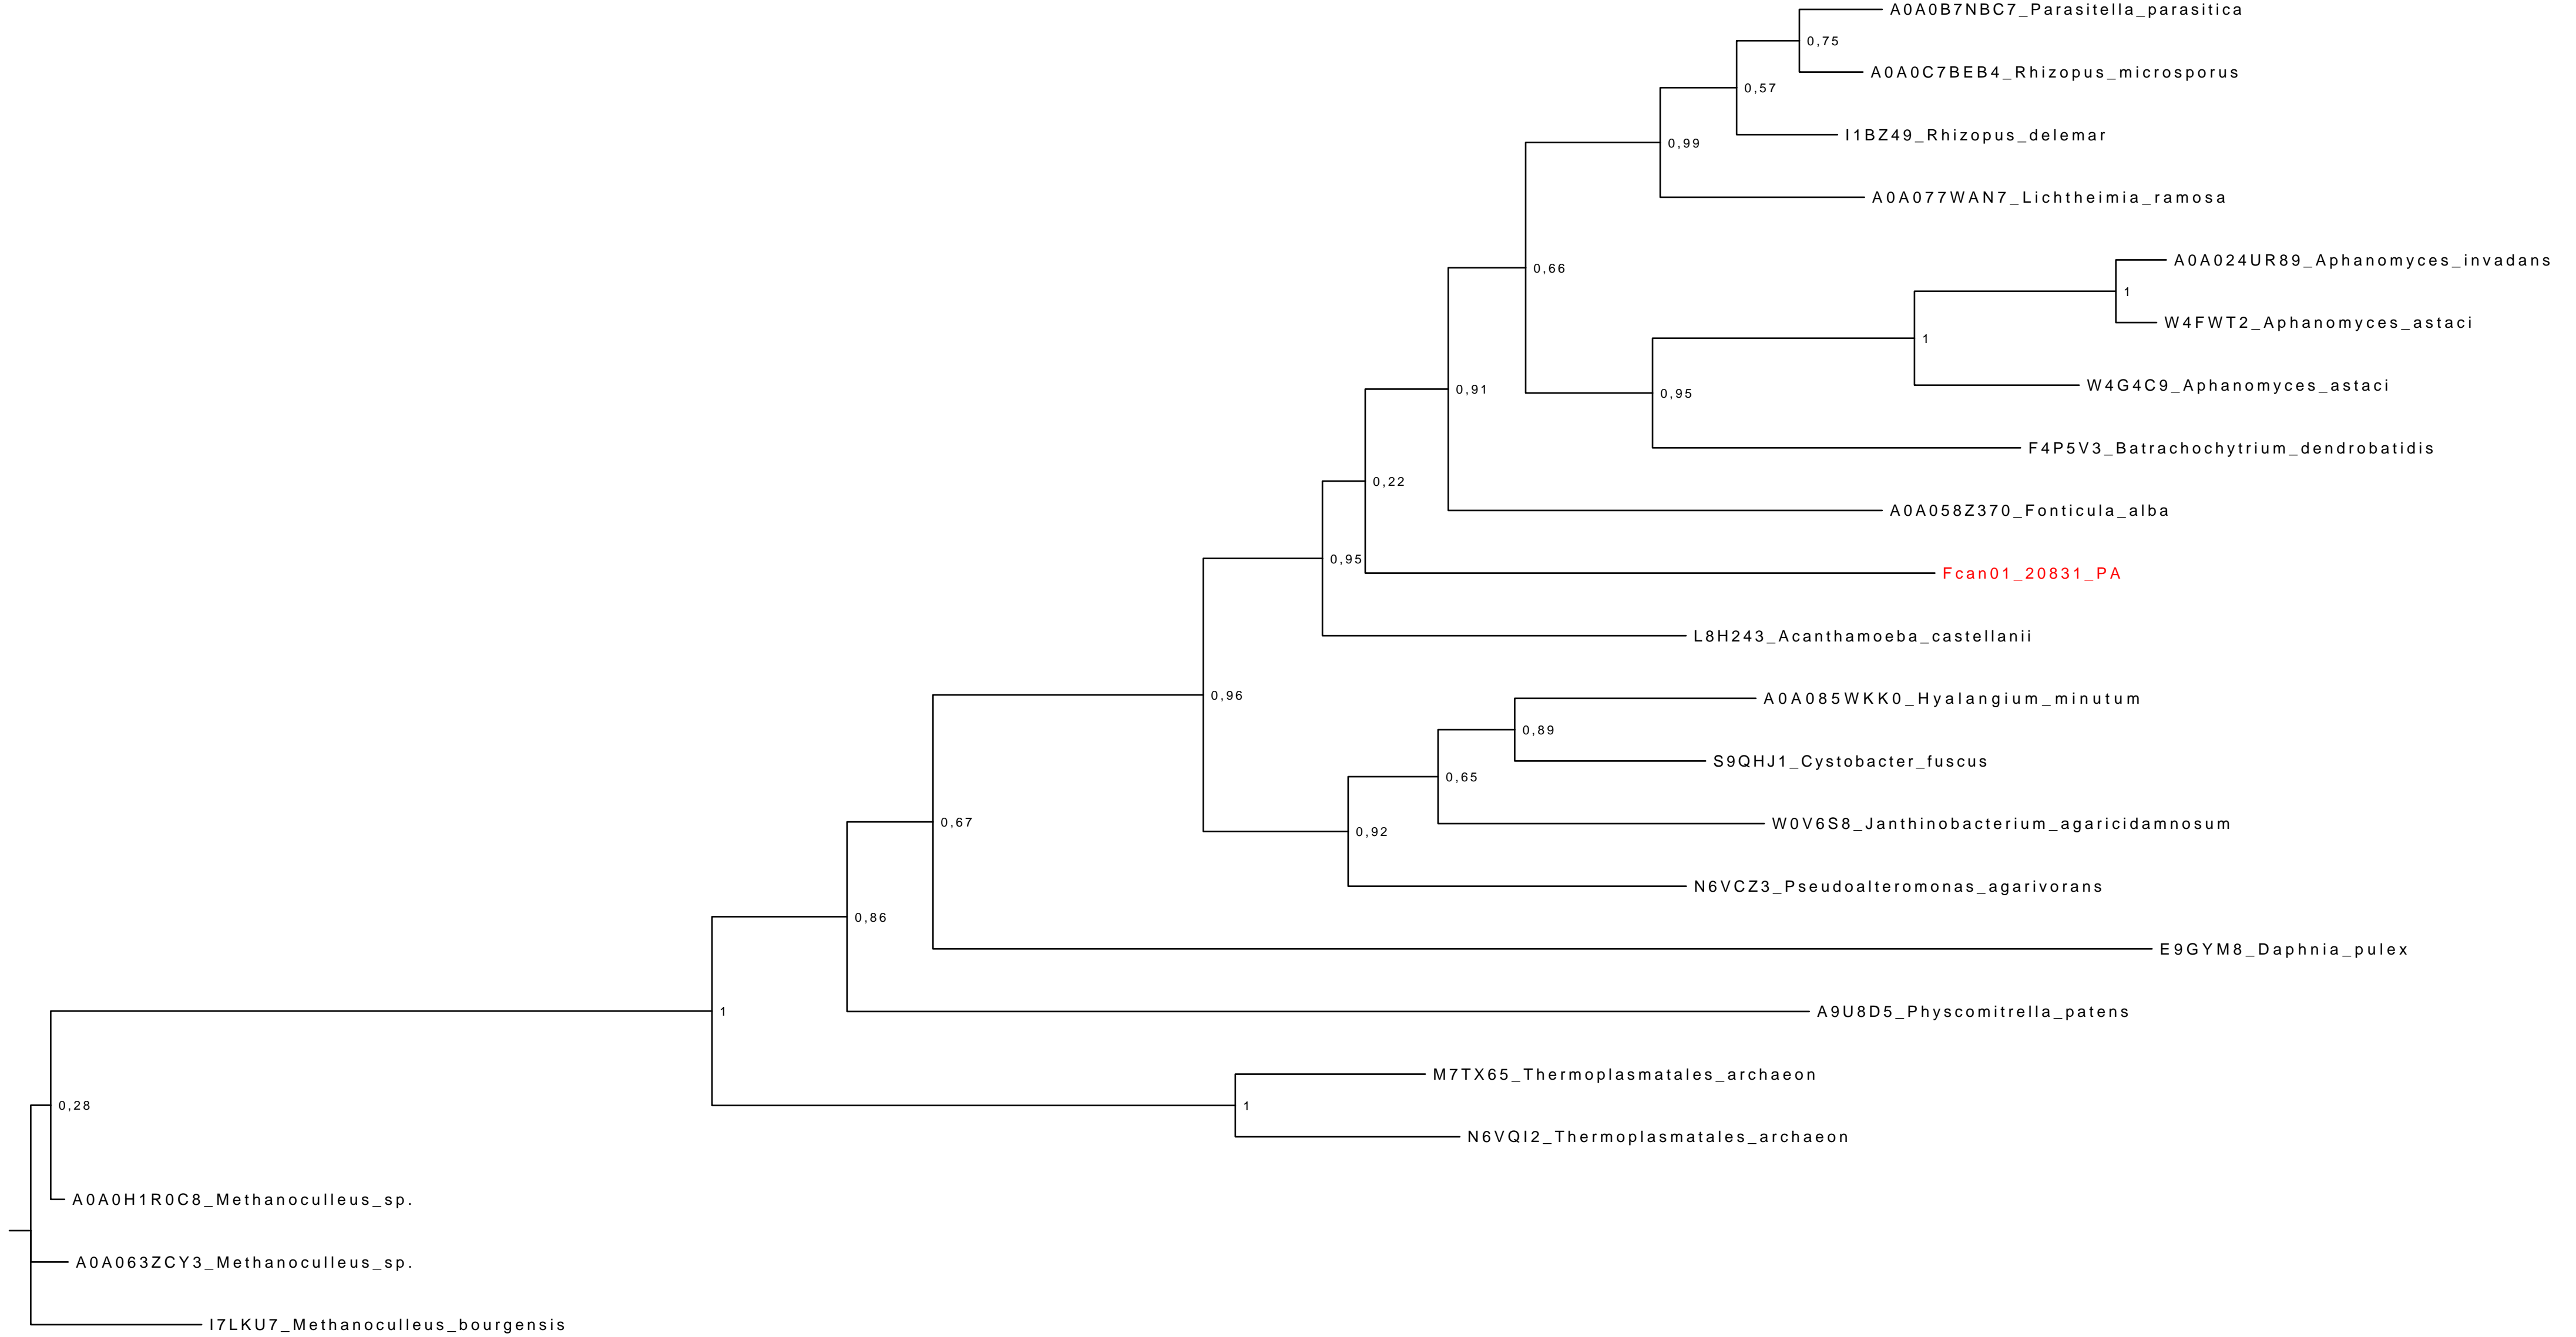



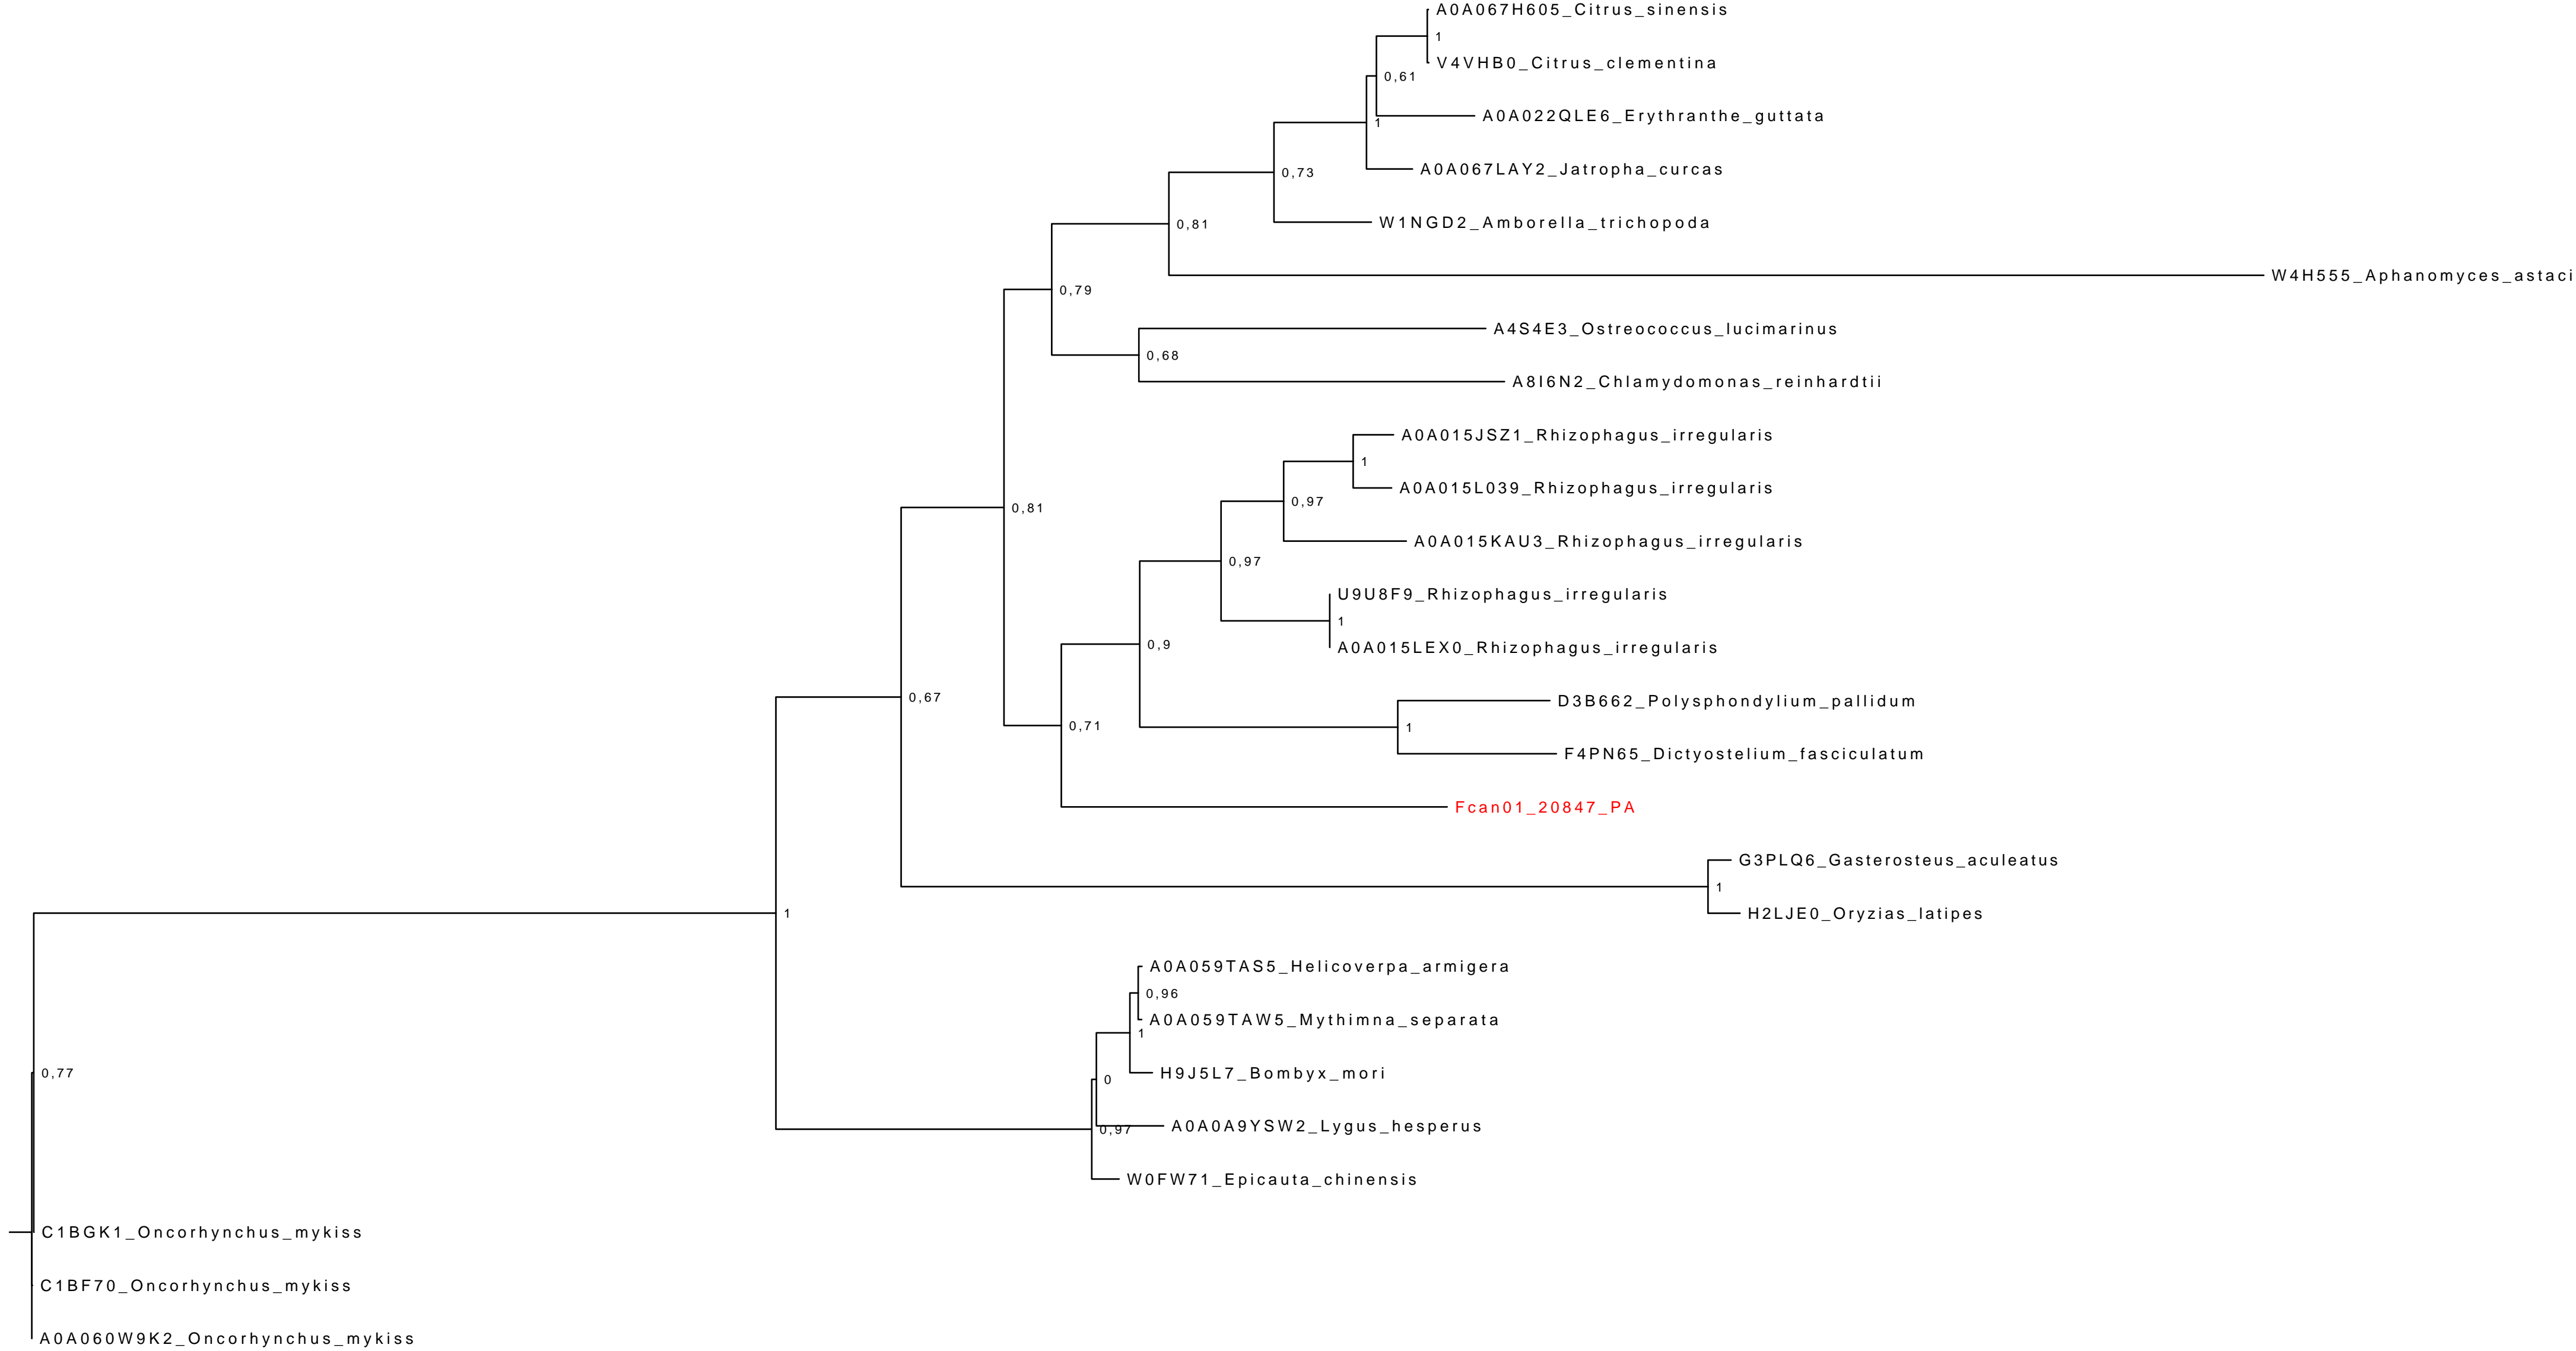

1.0

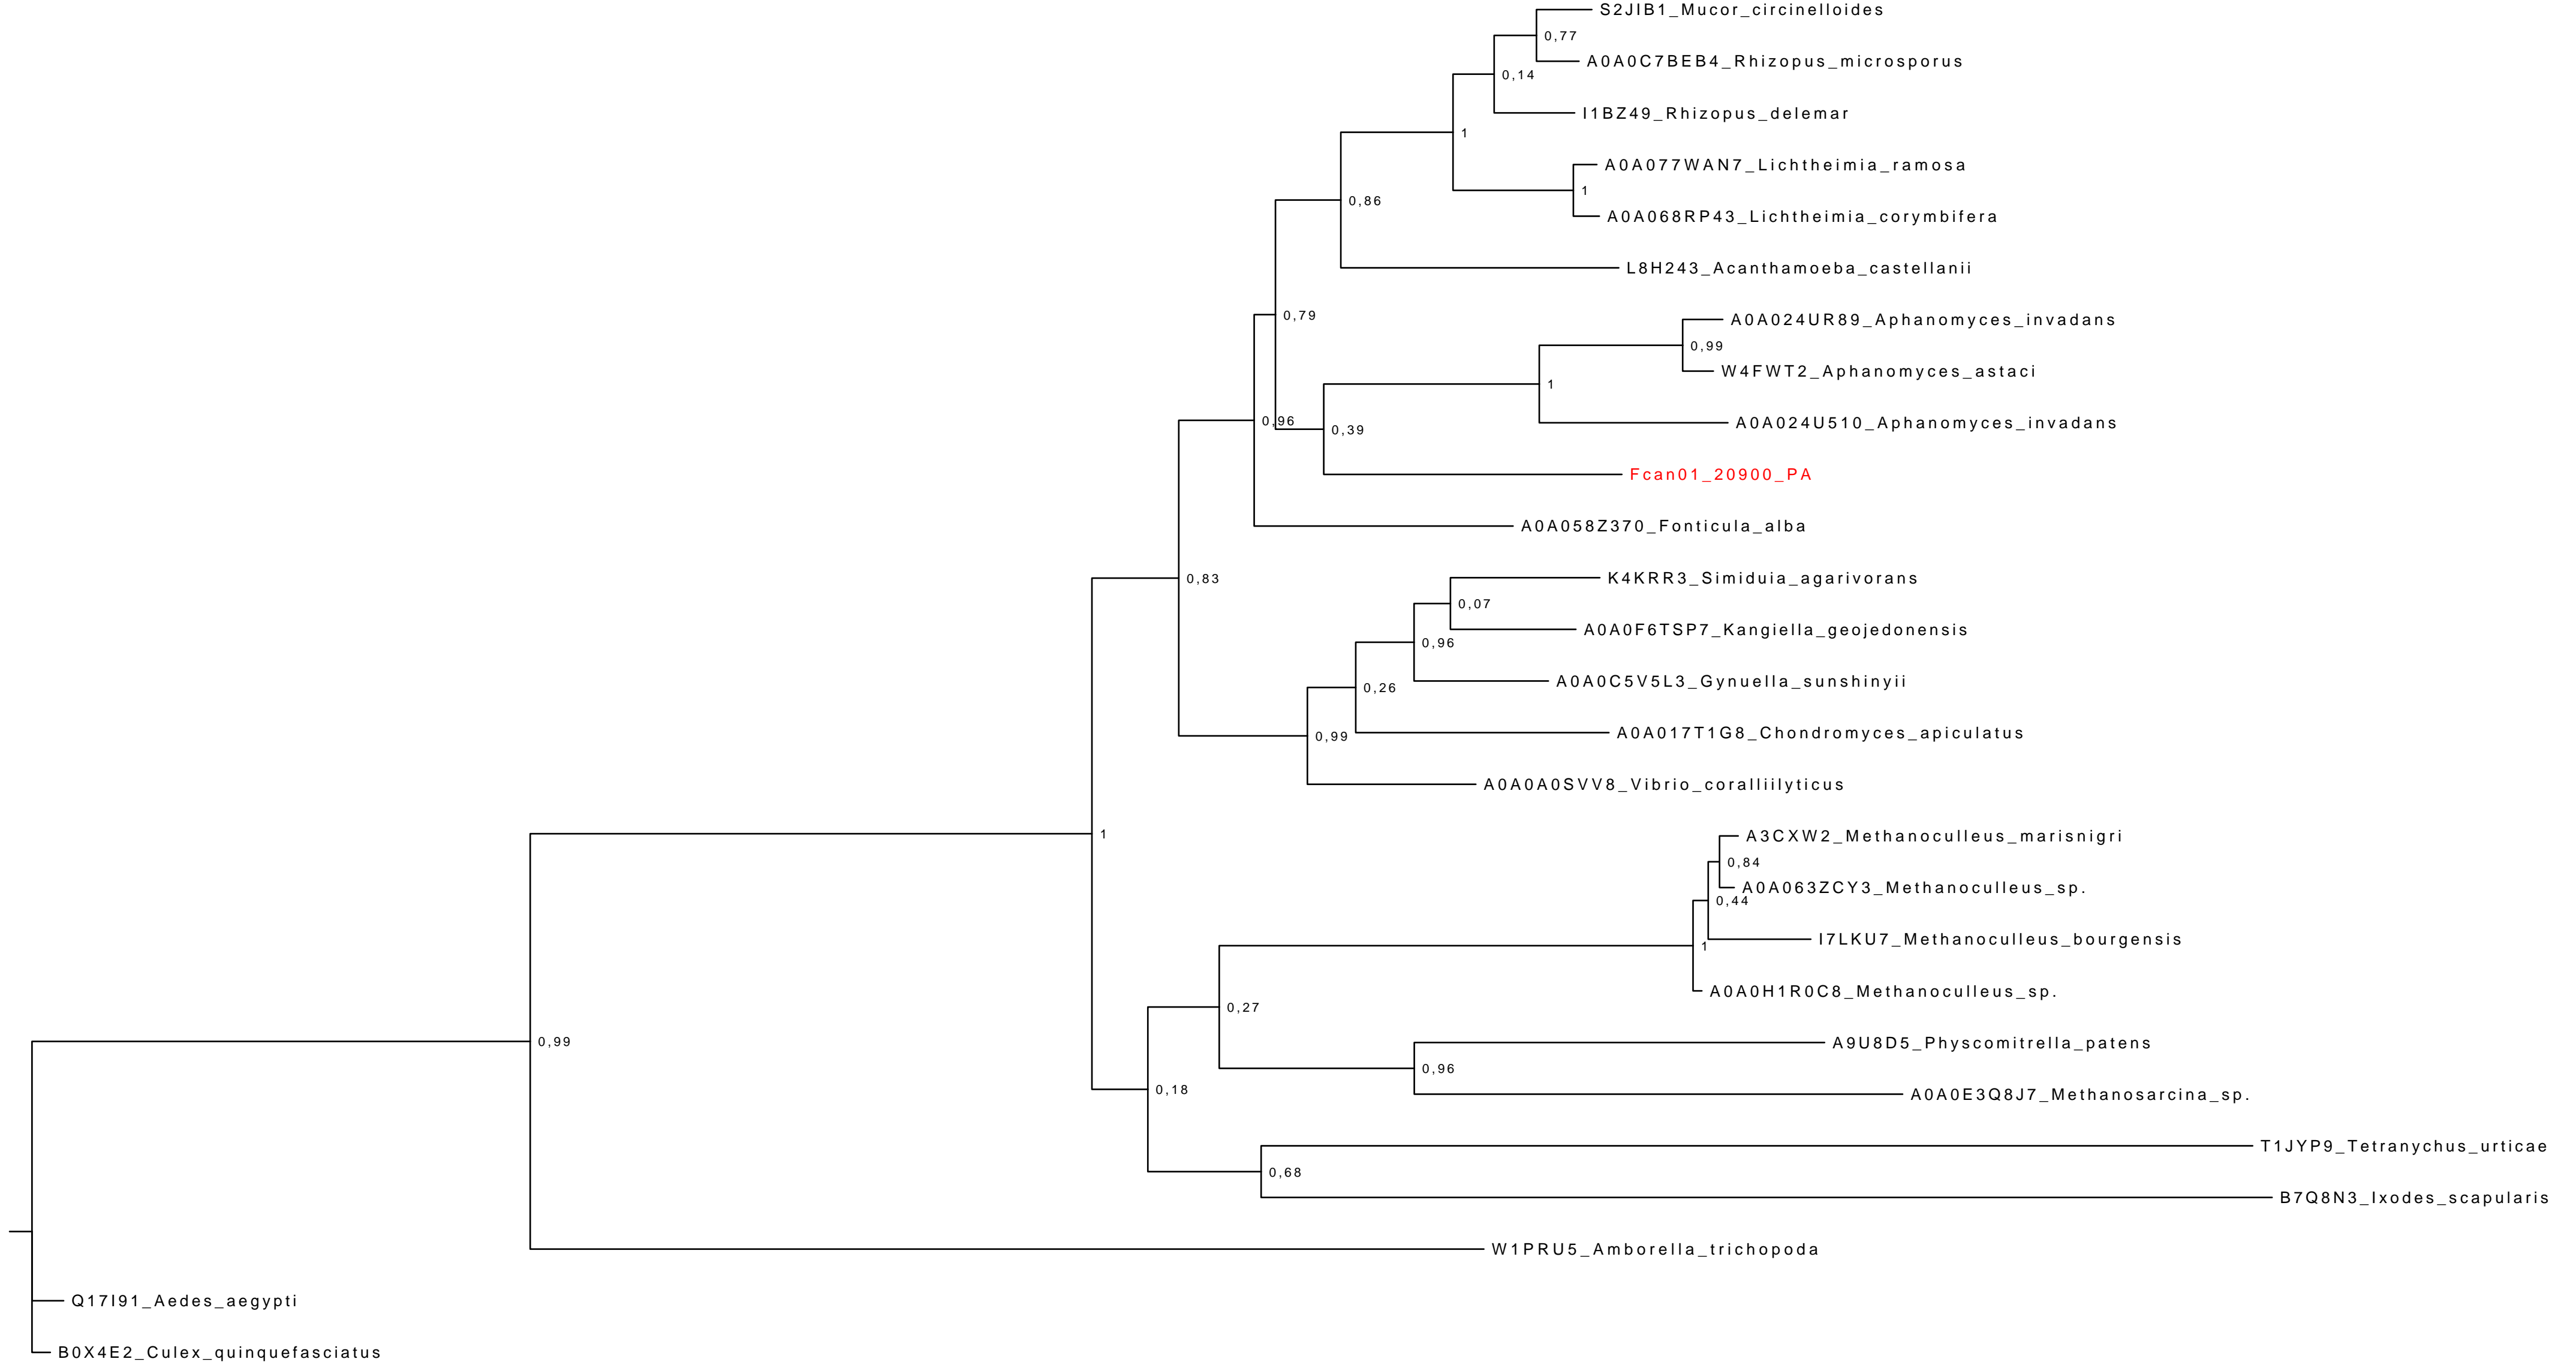

0.7

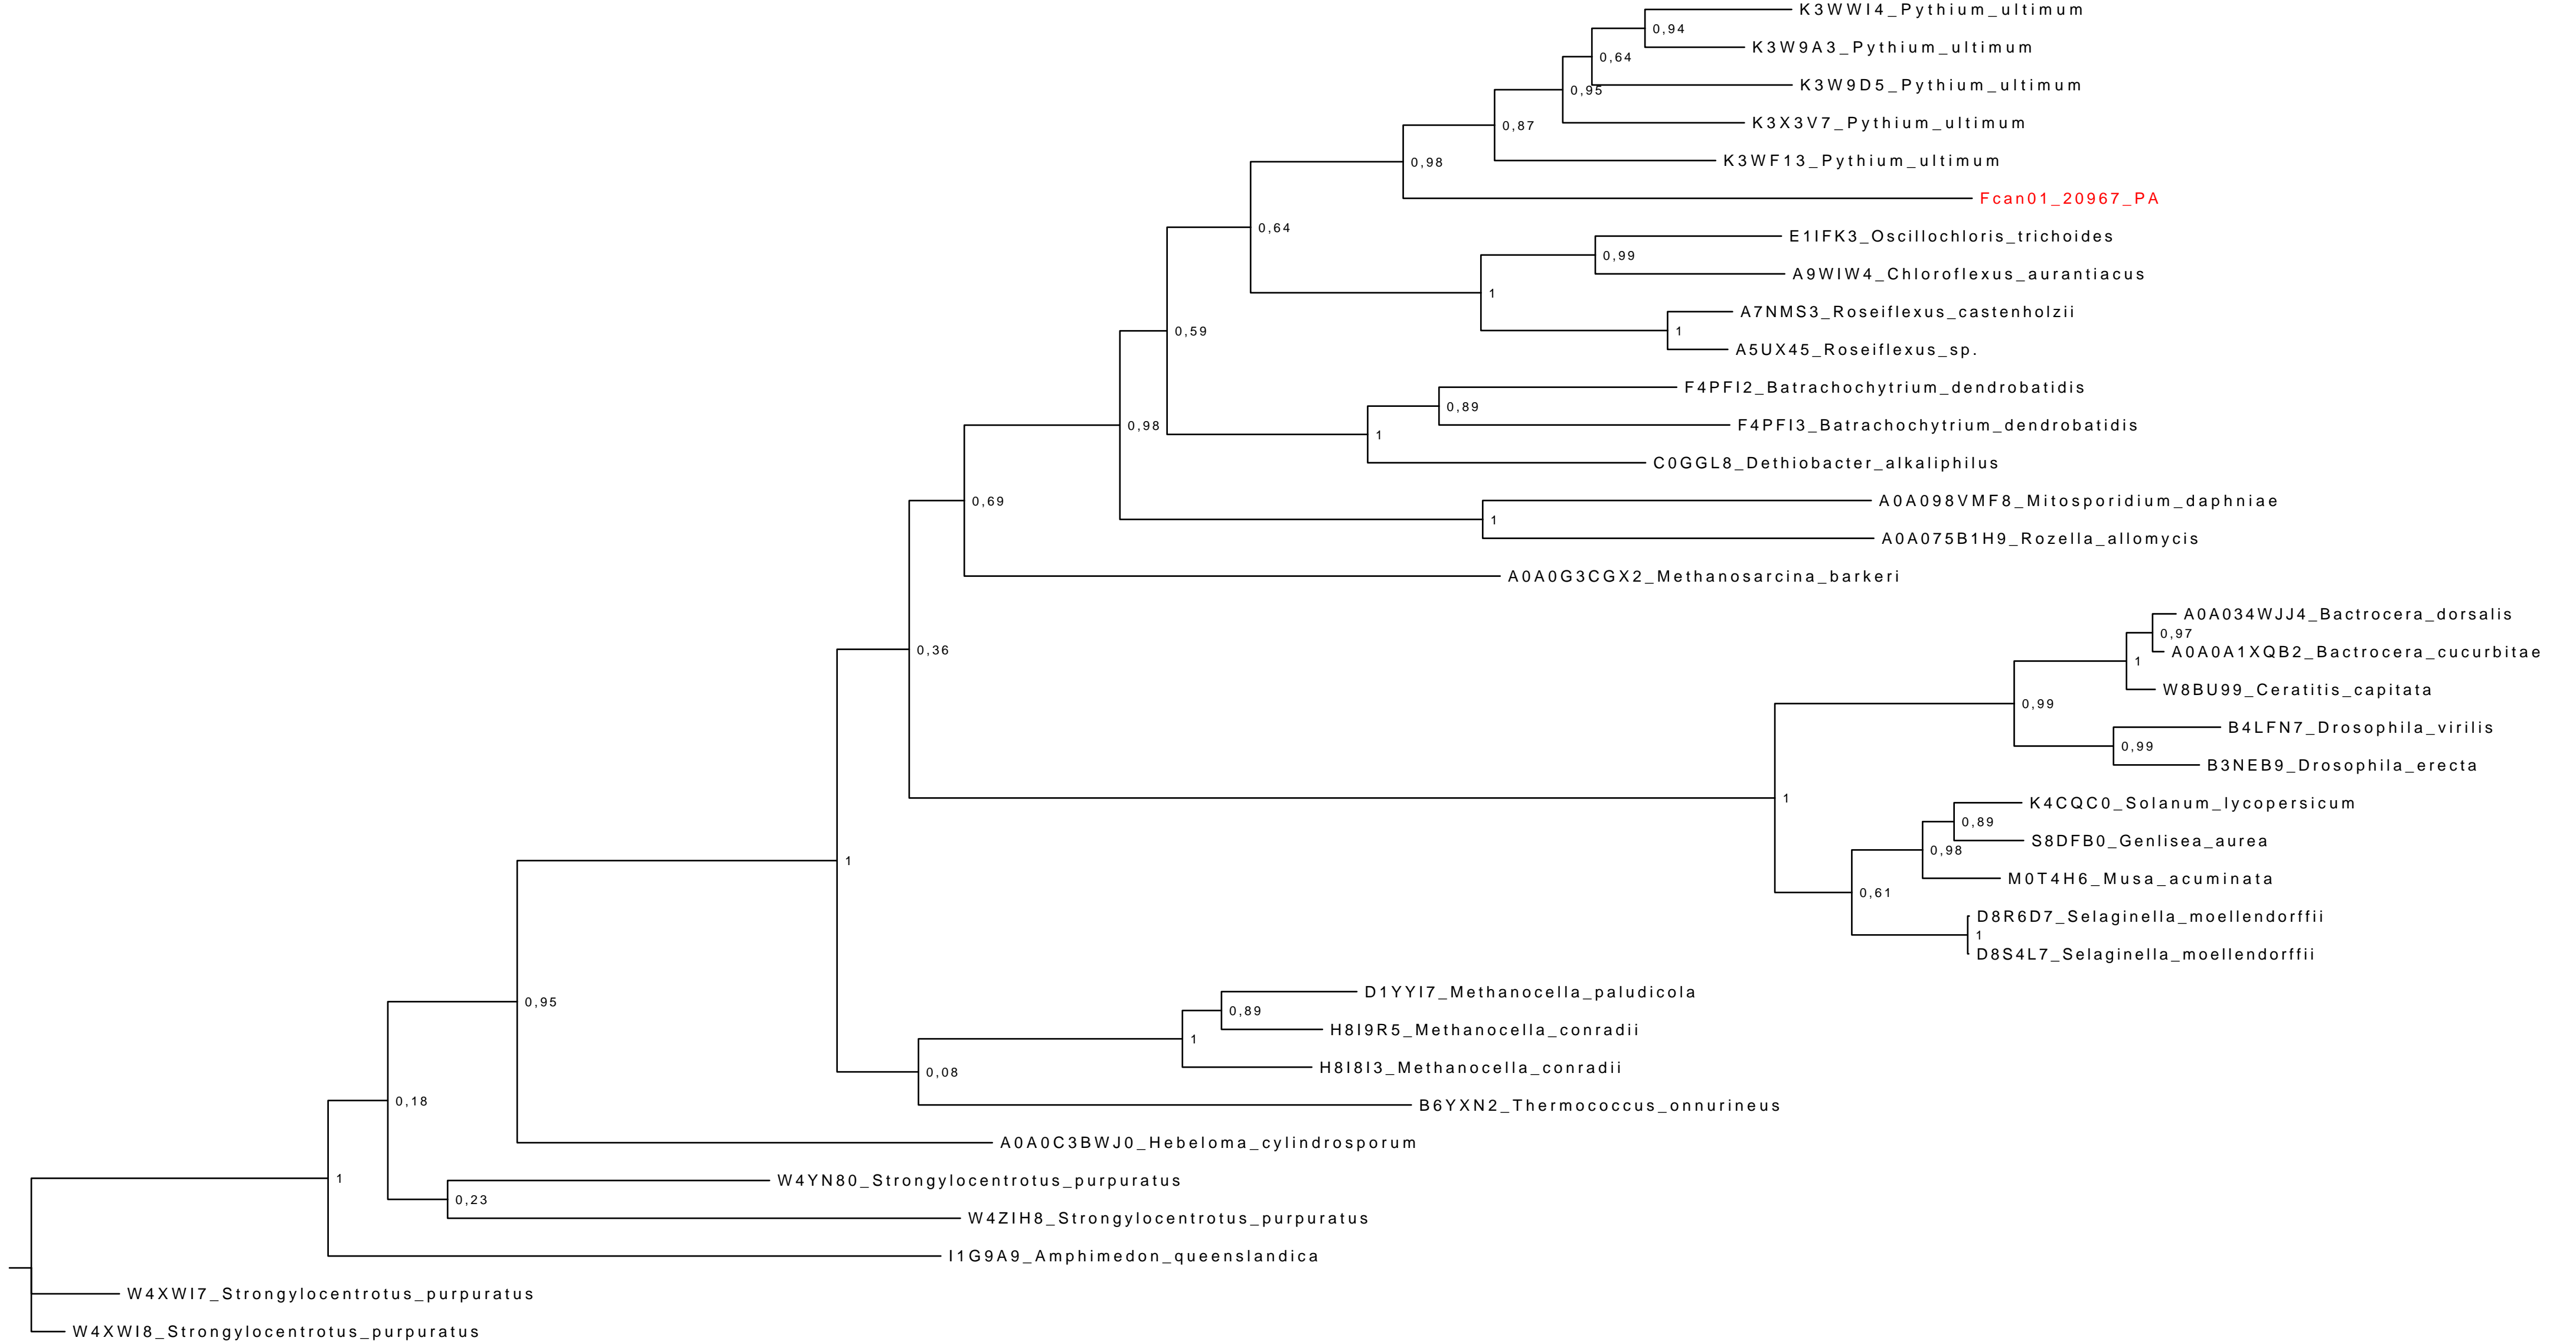

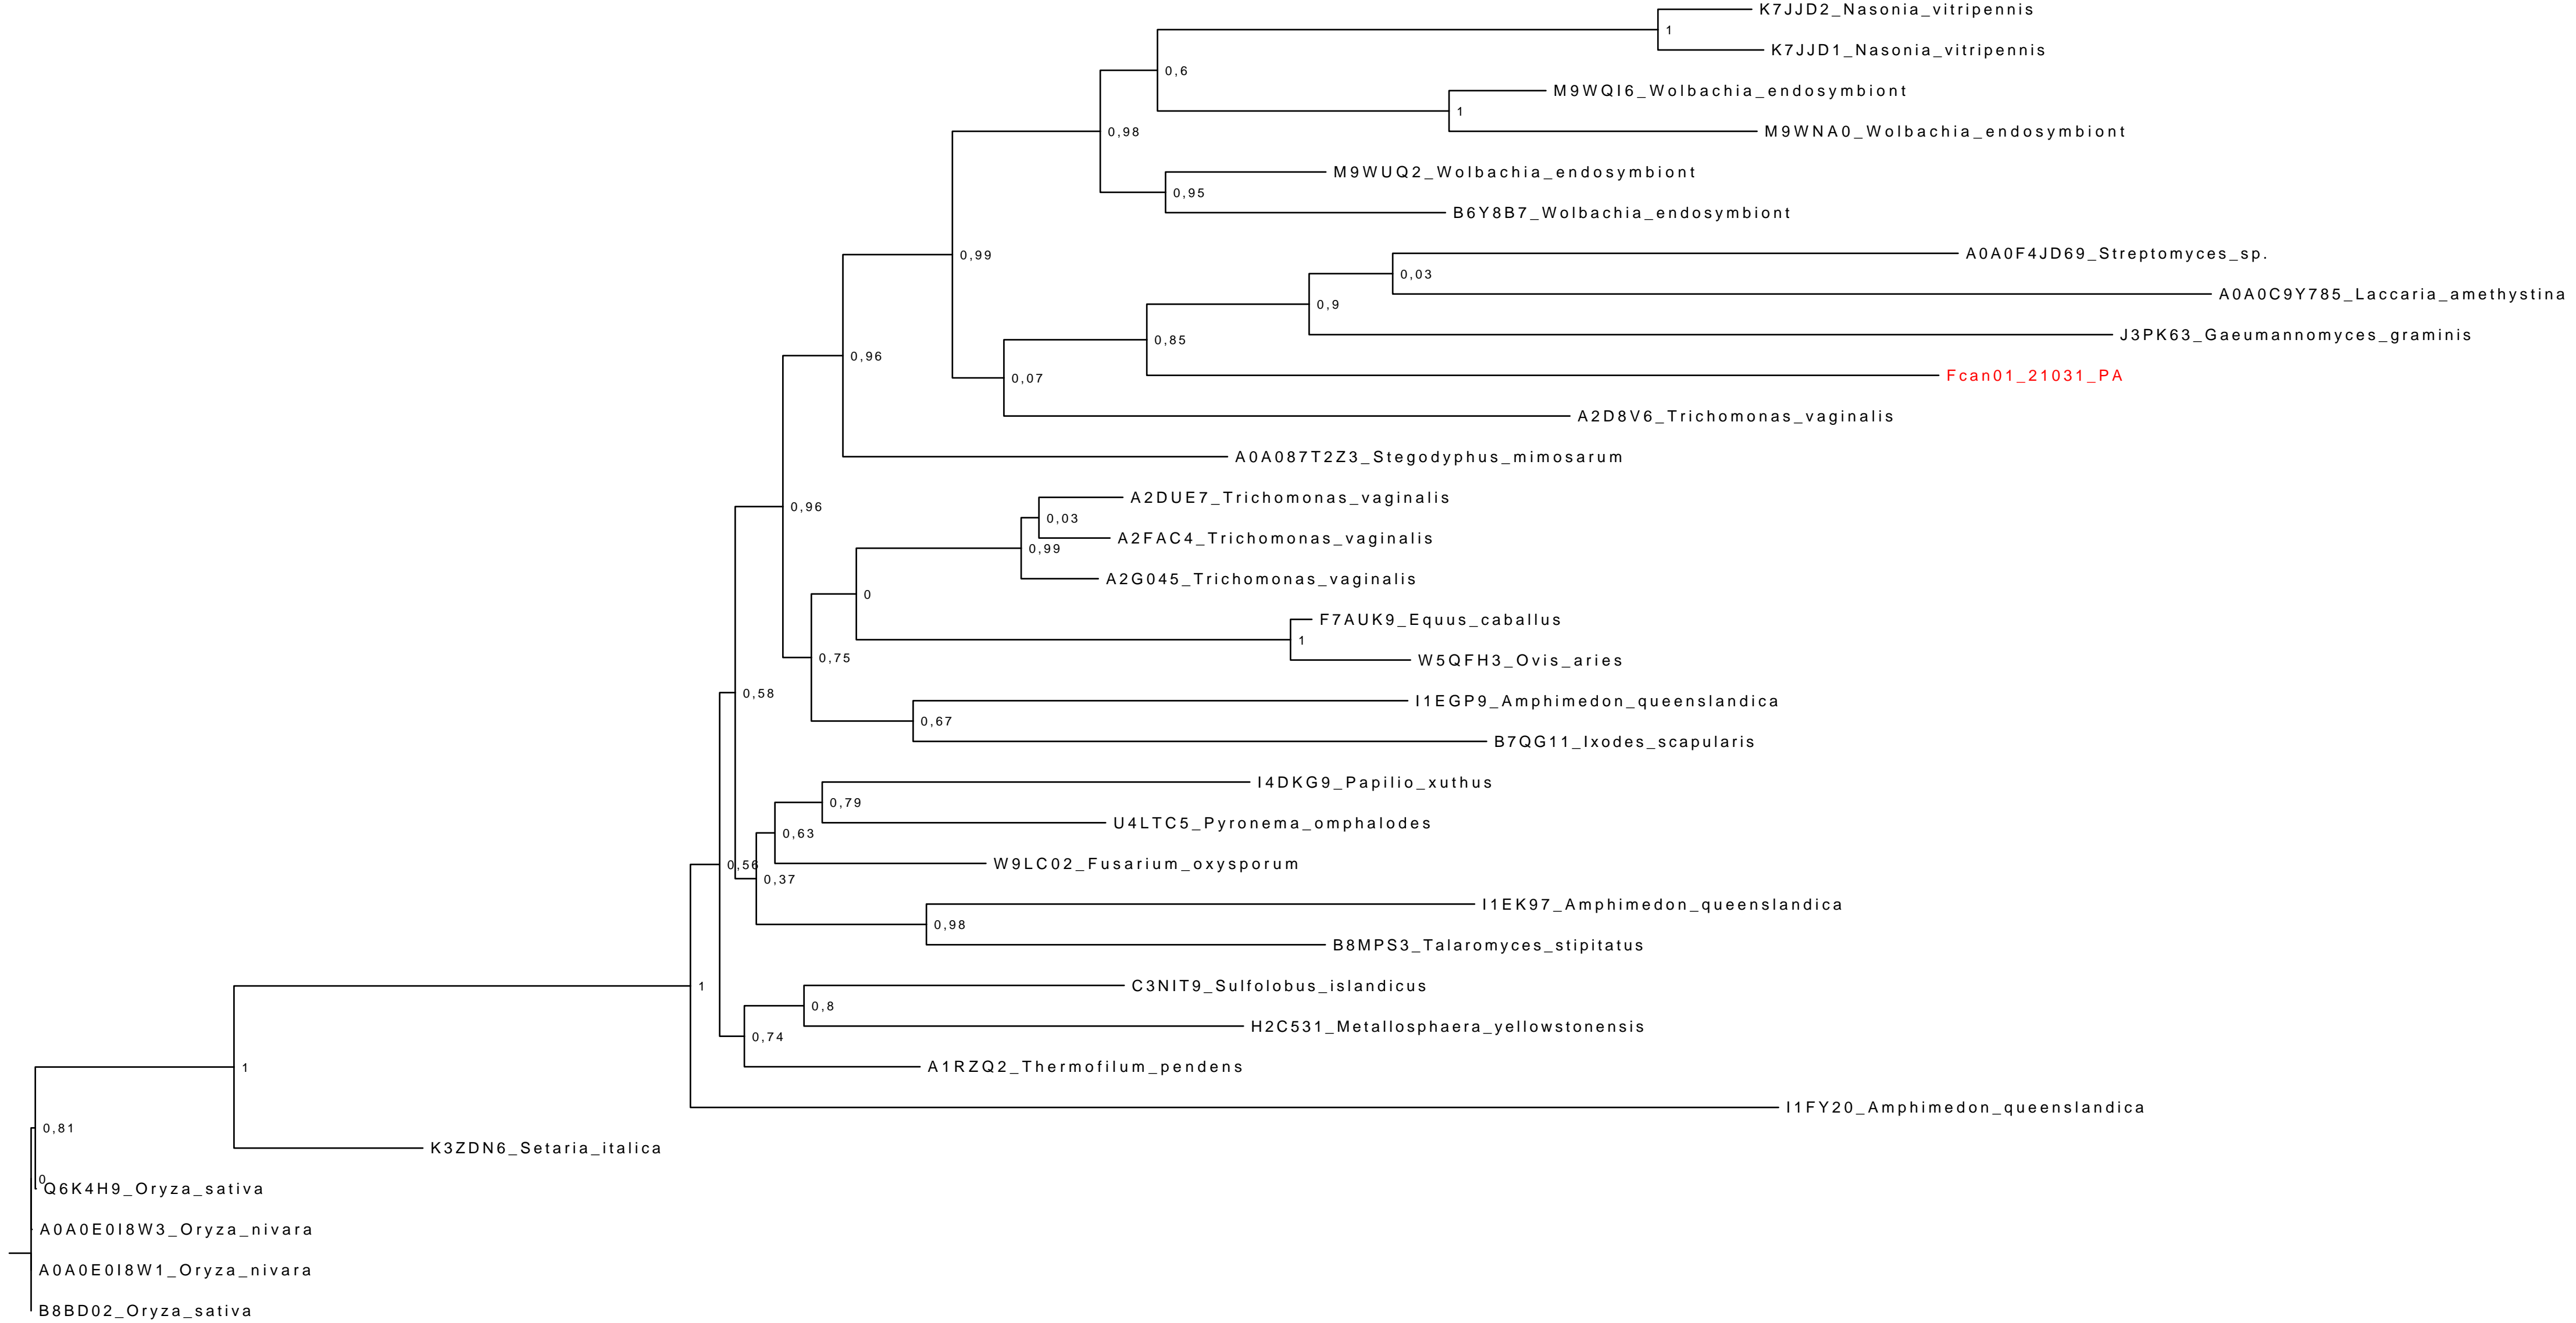

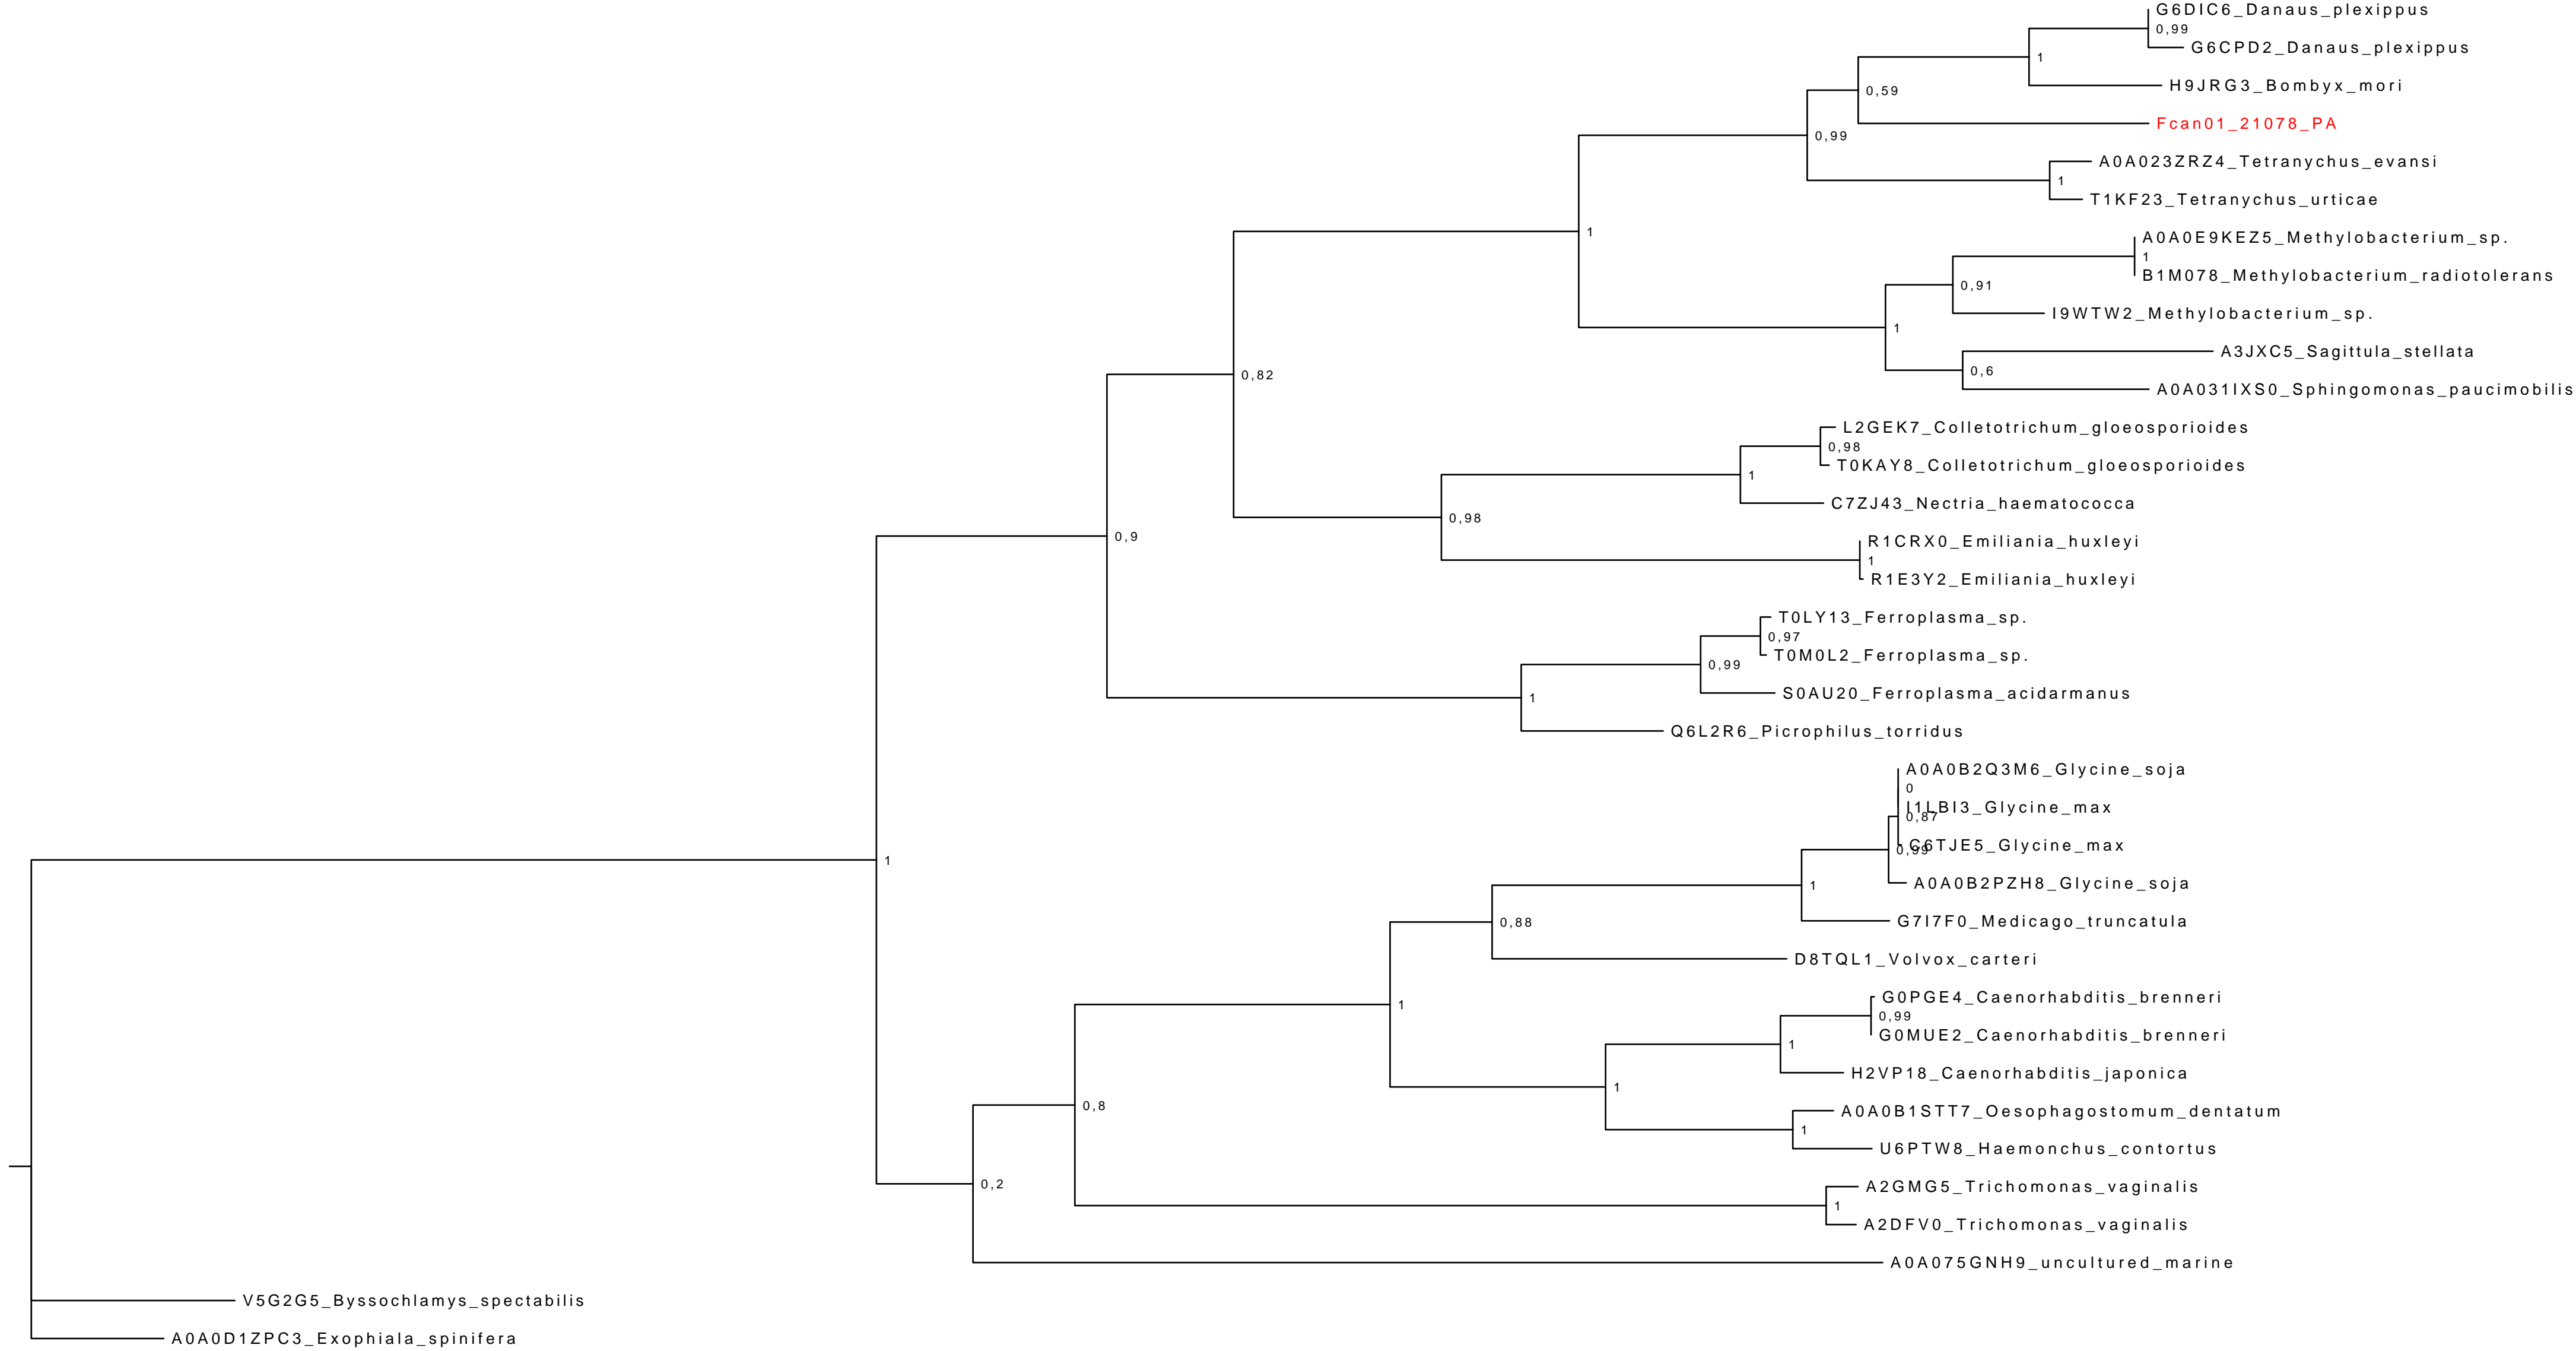

0.3

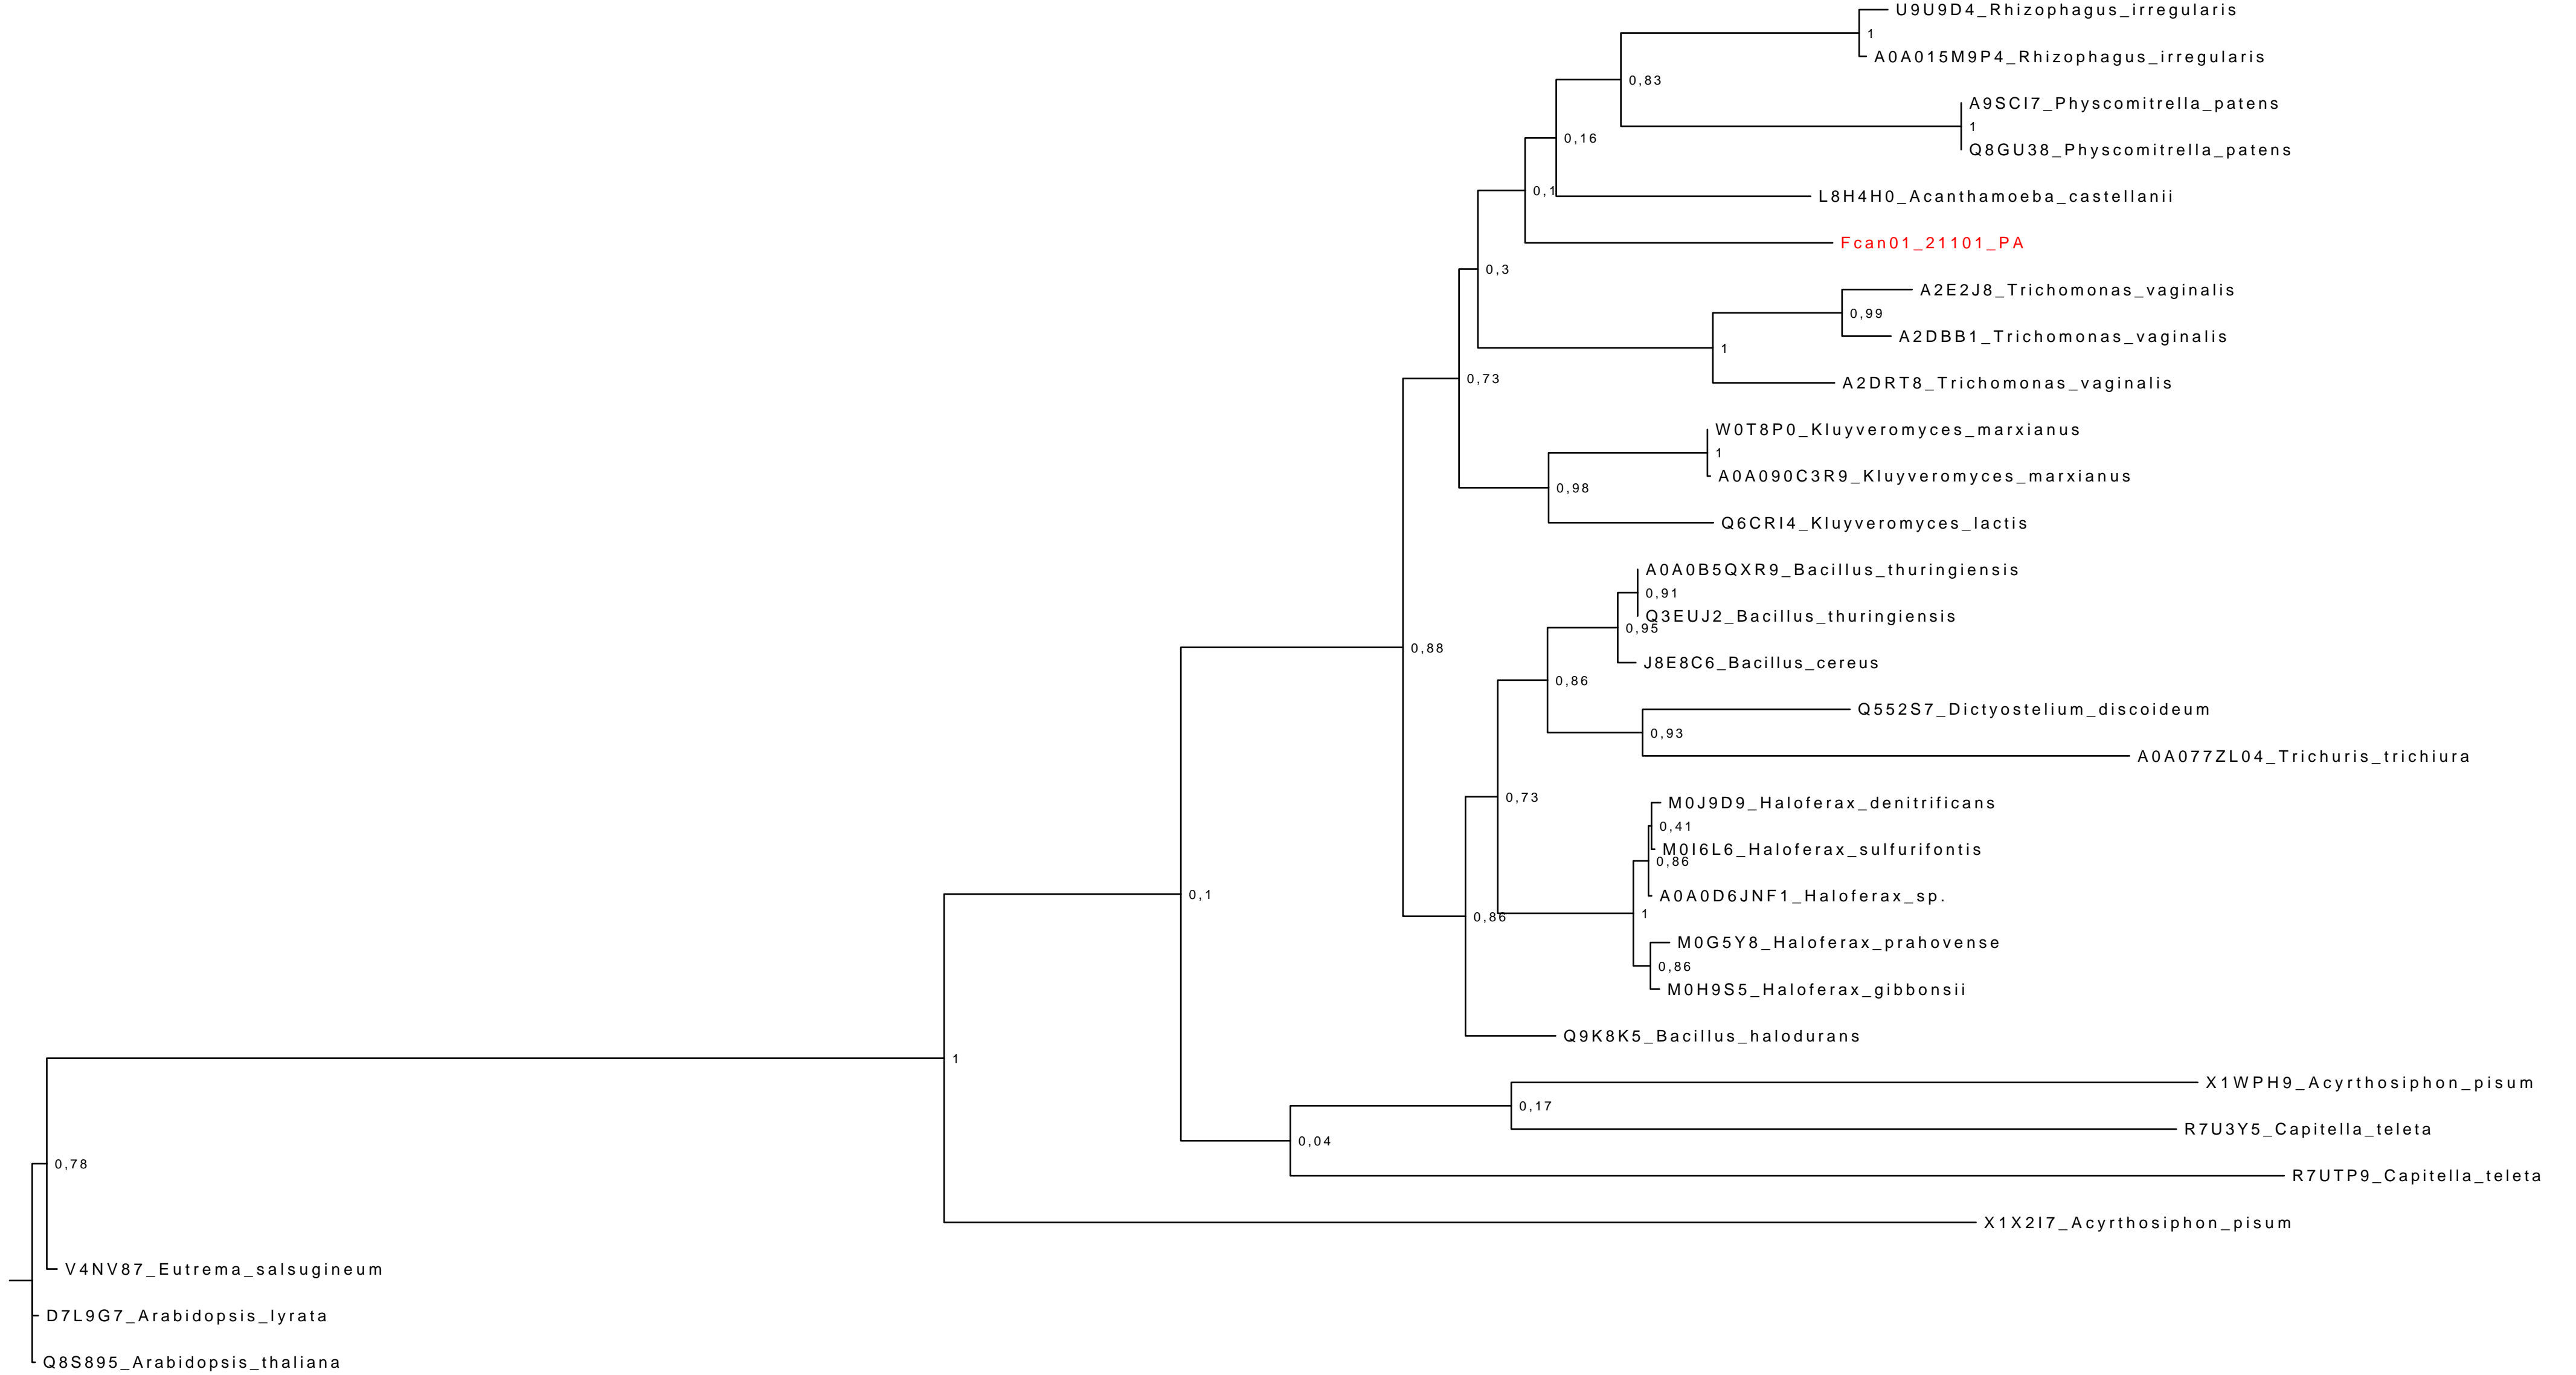

0.5

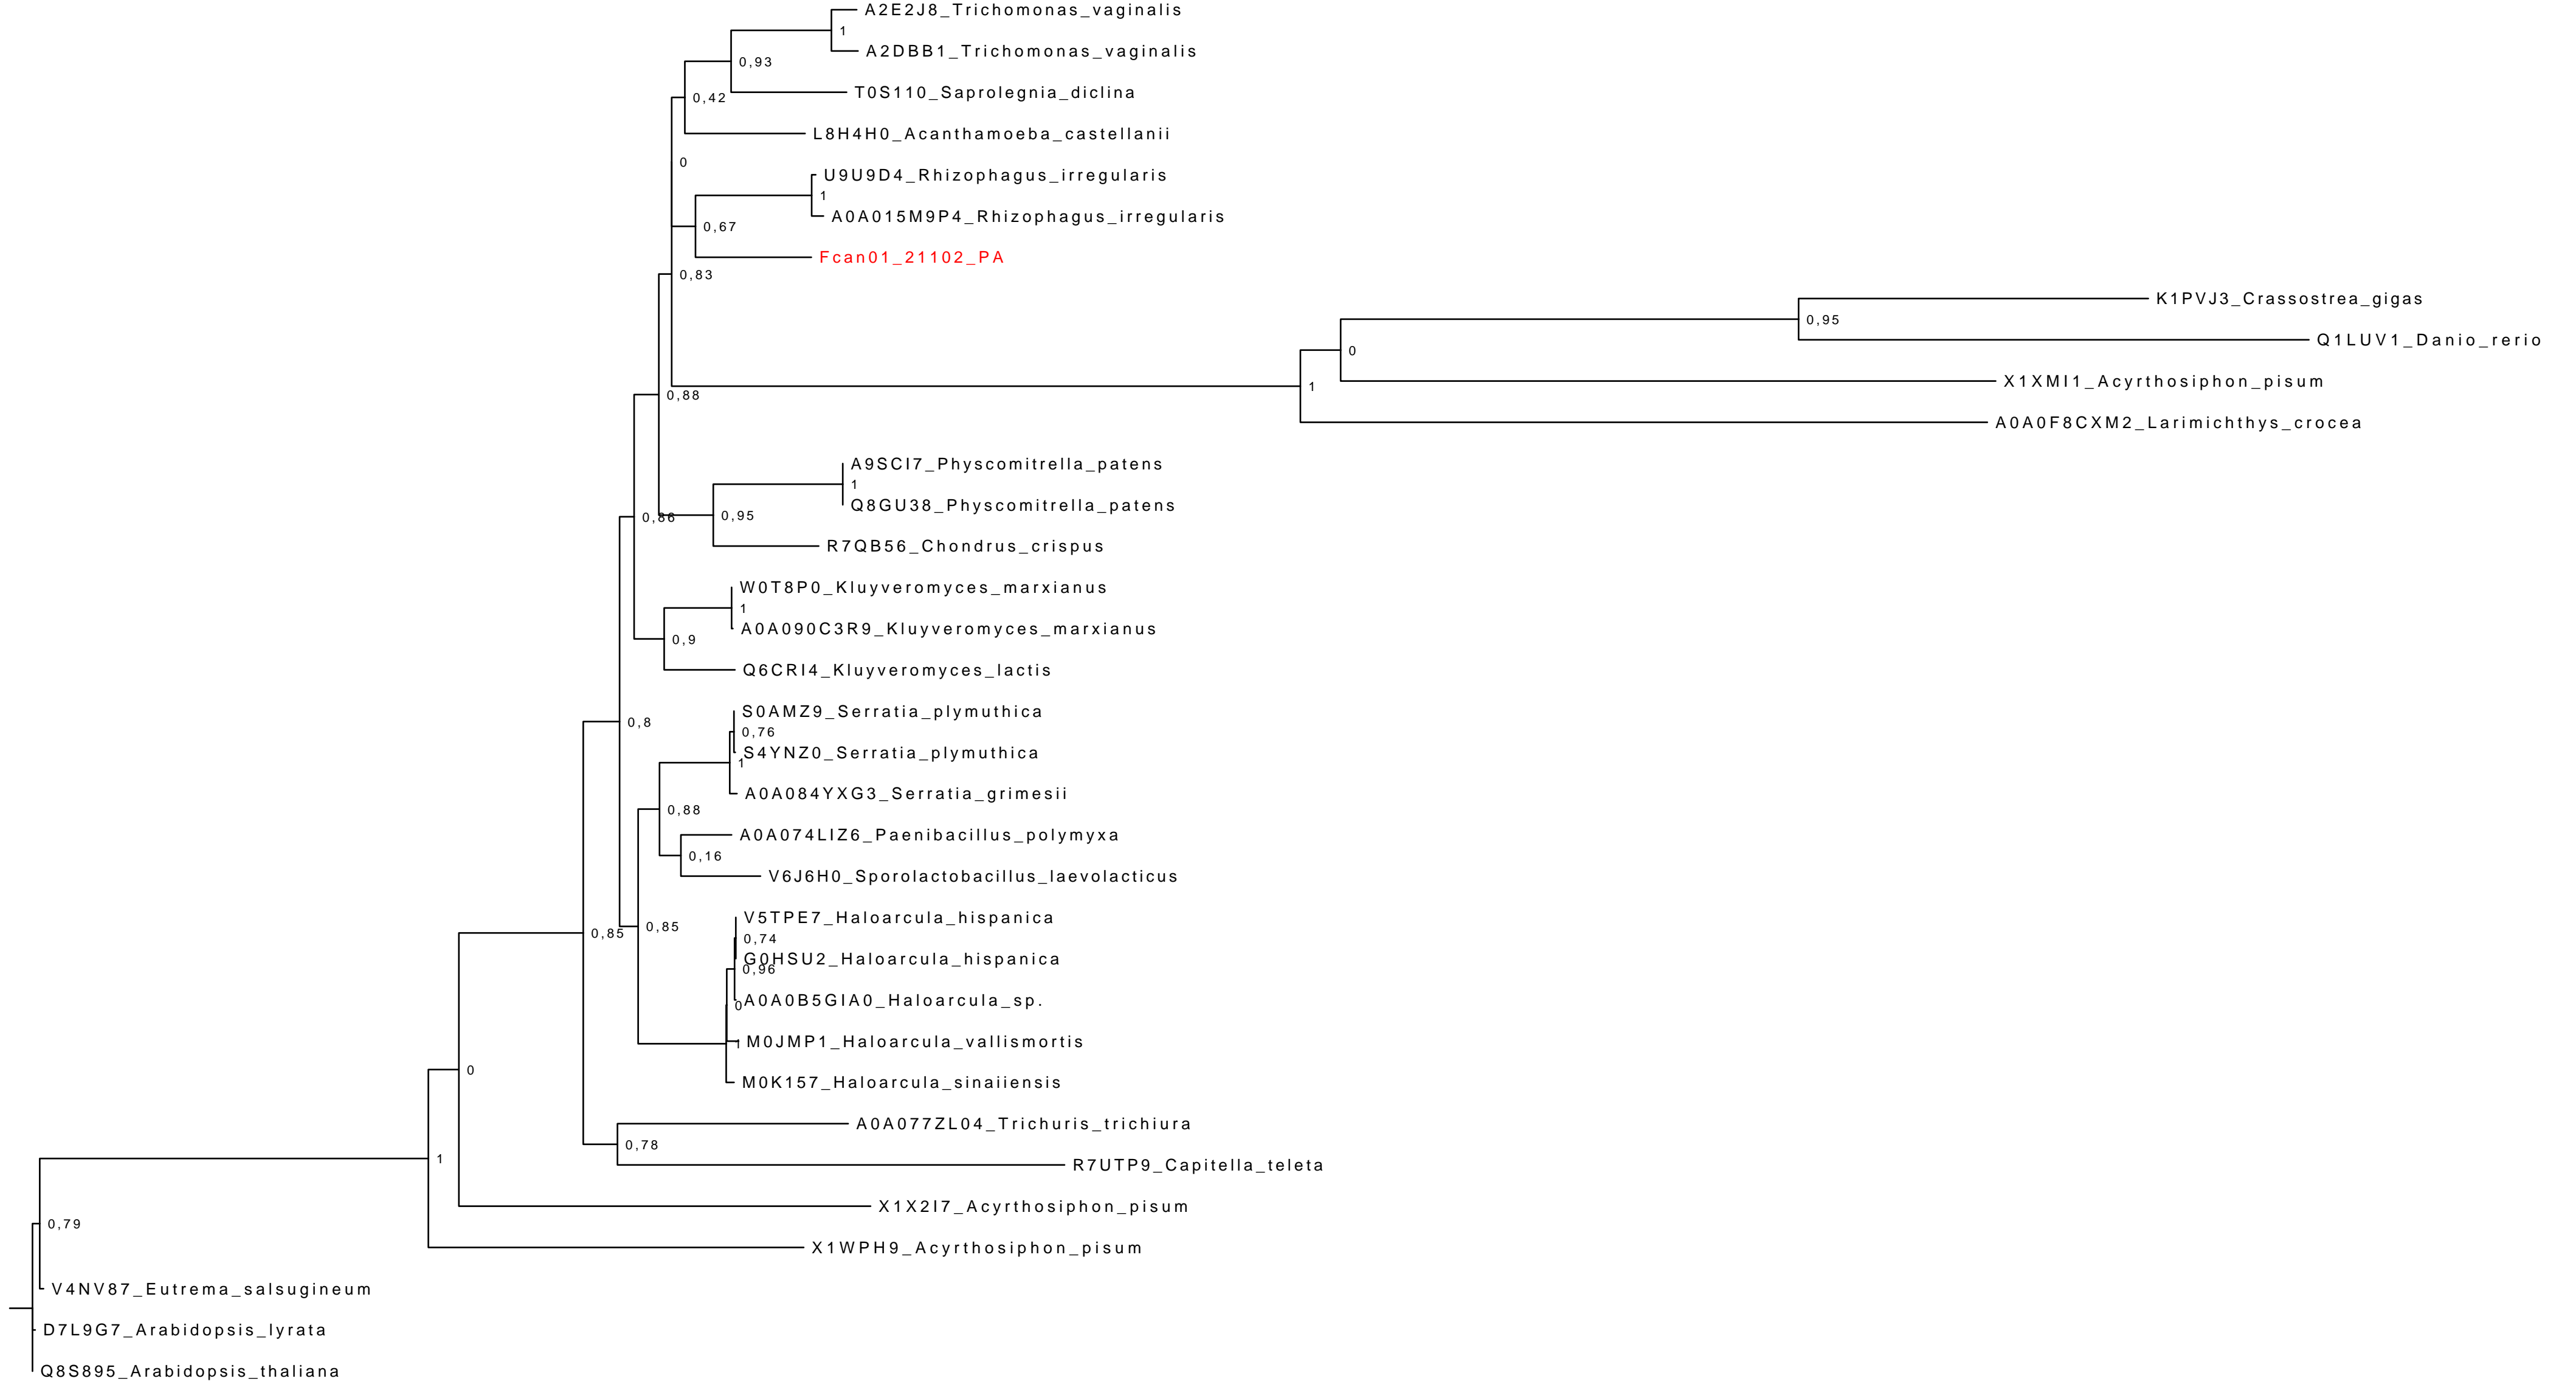

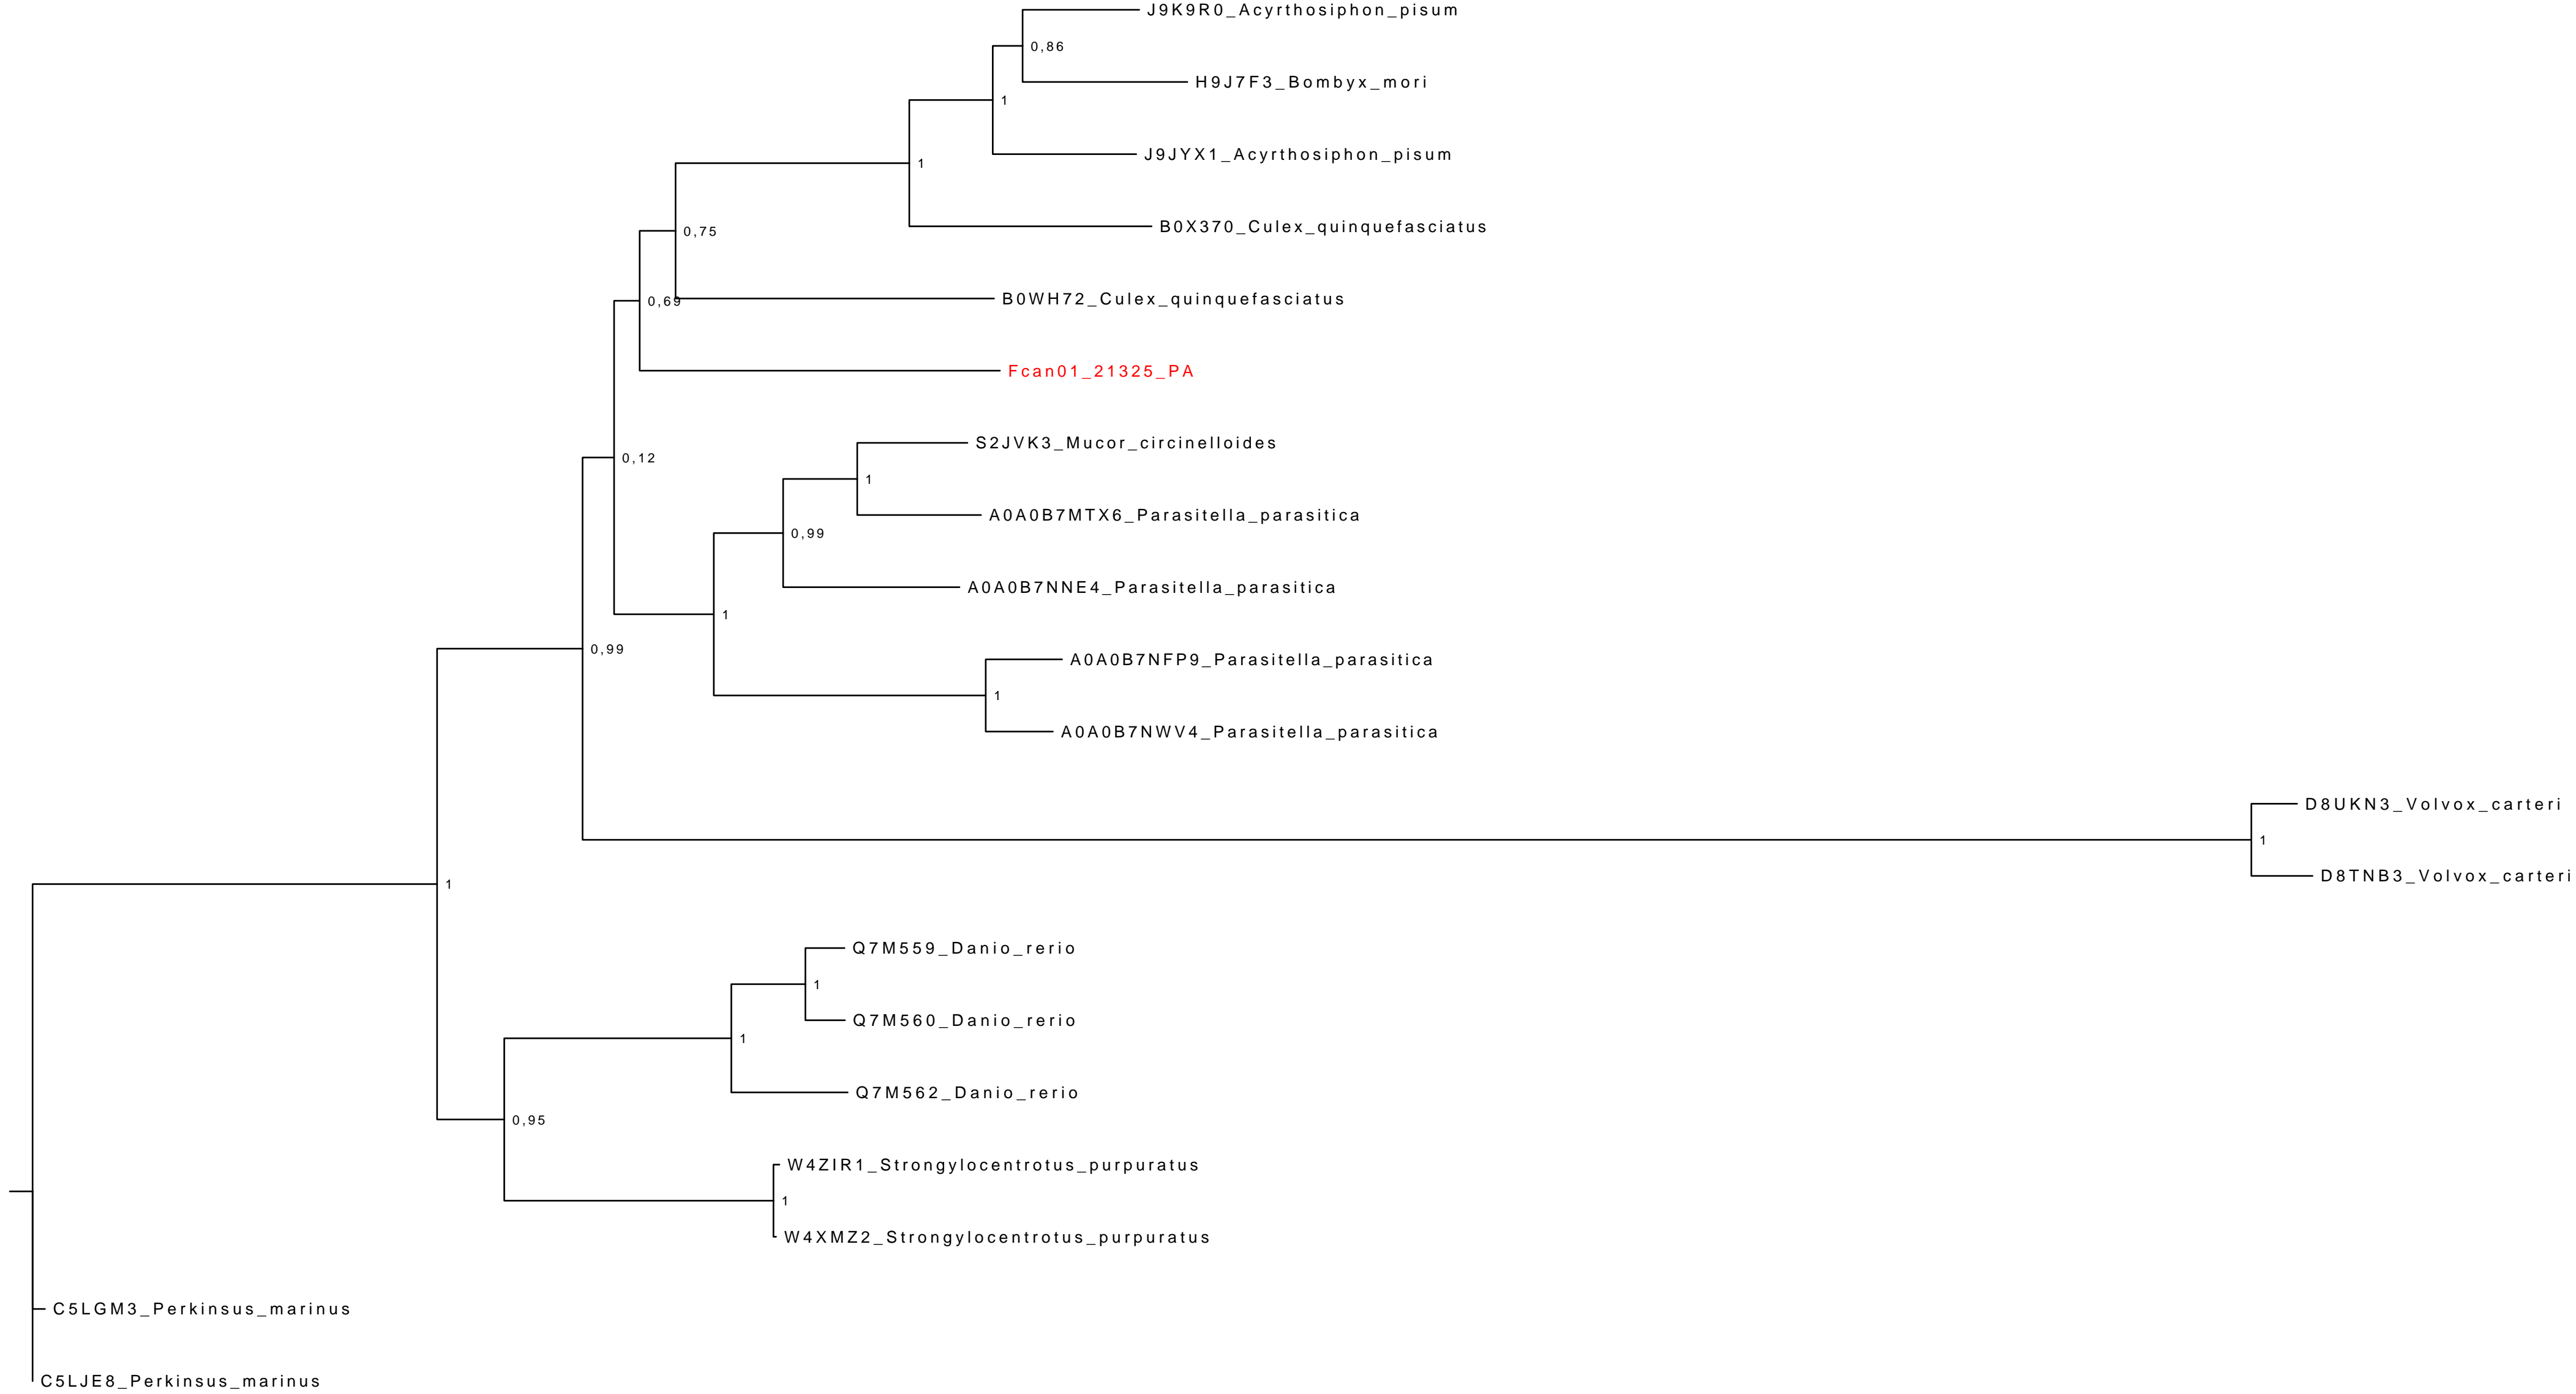

0.8



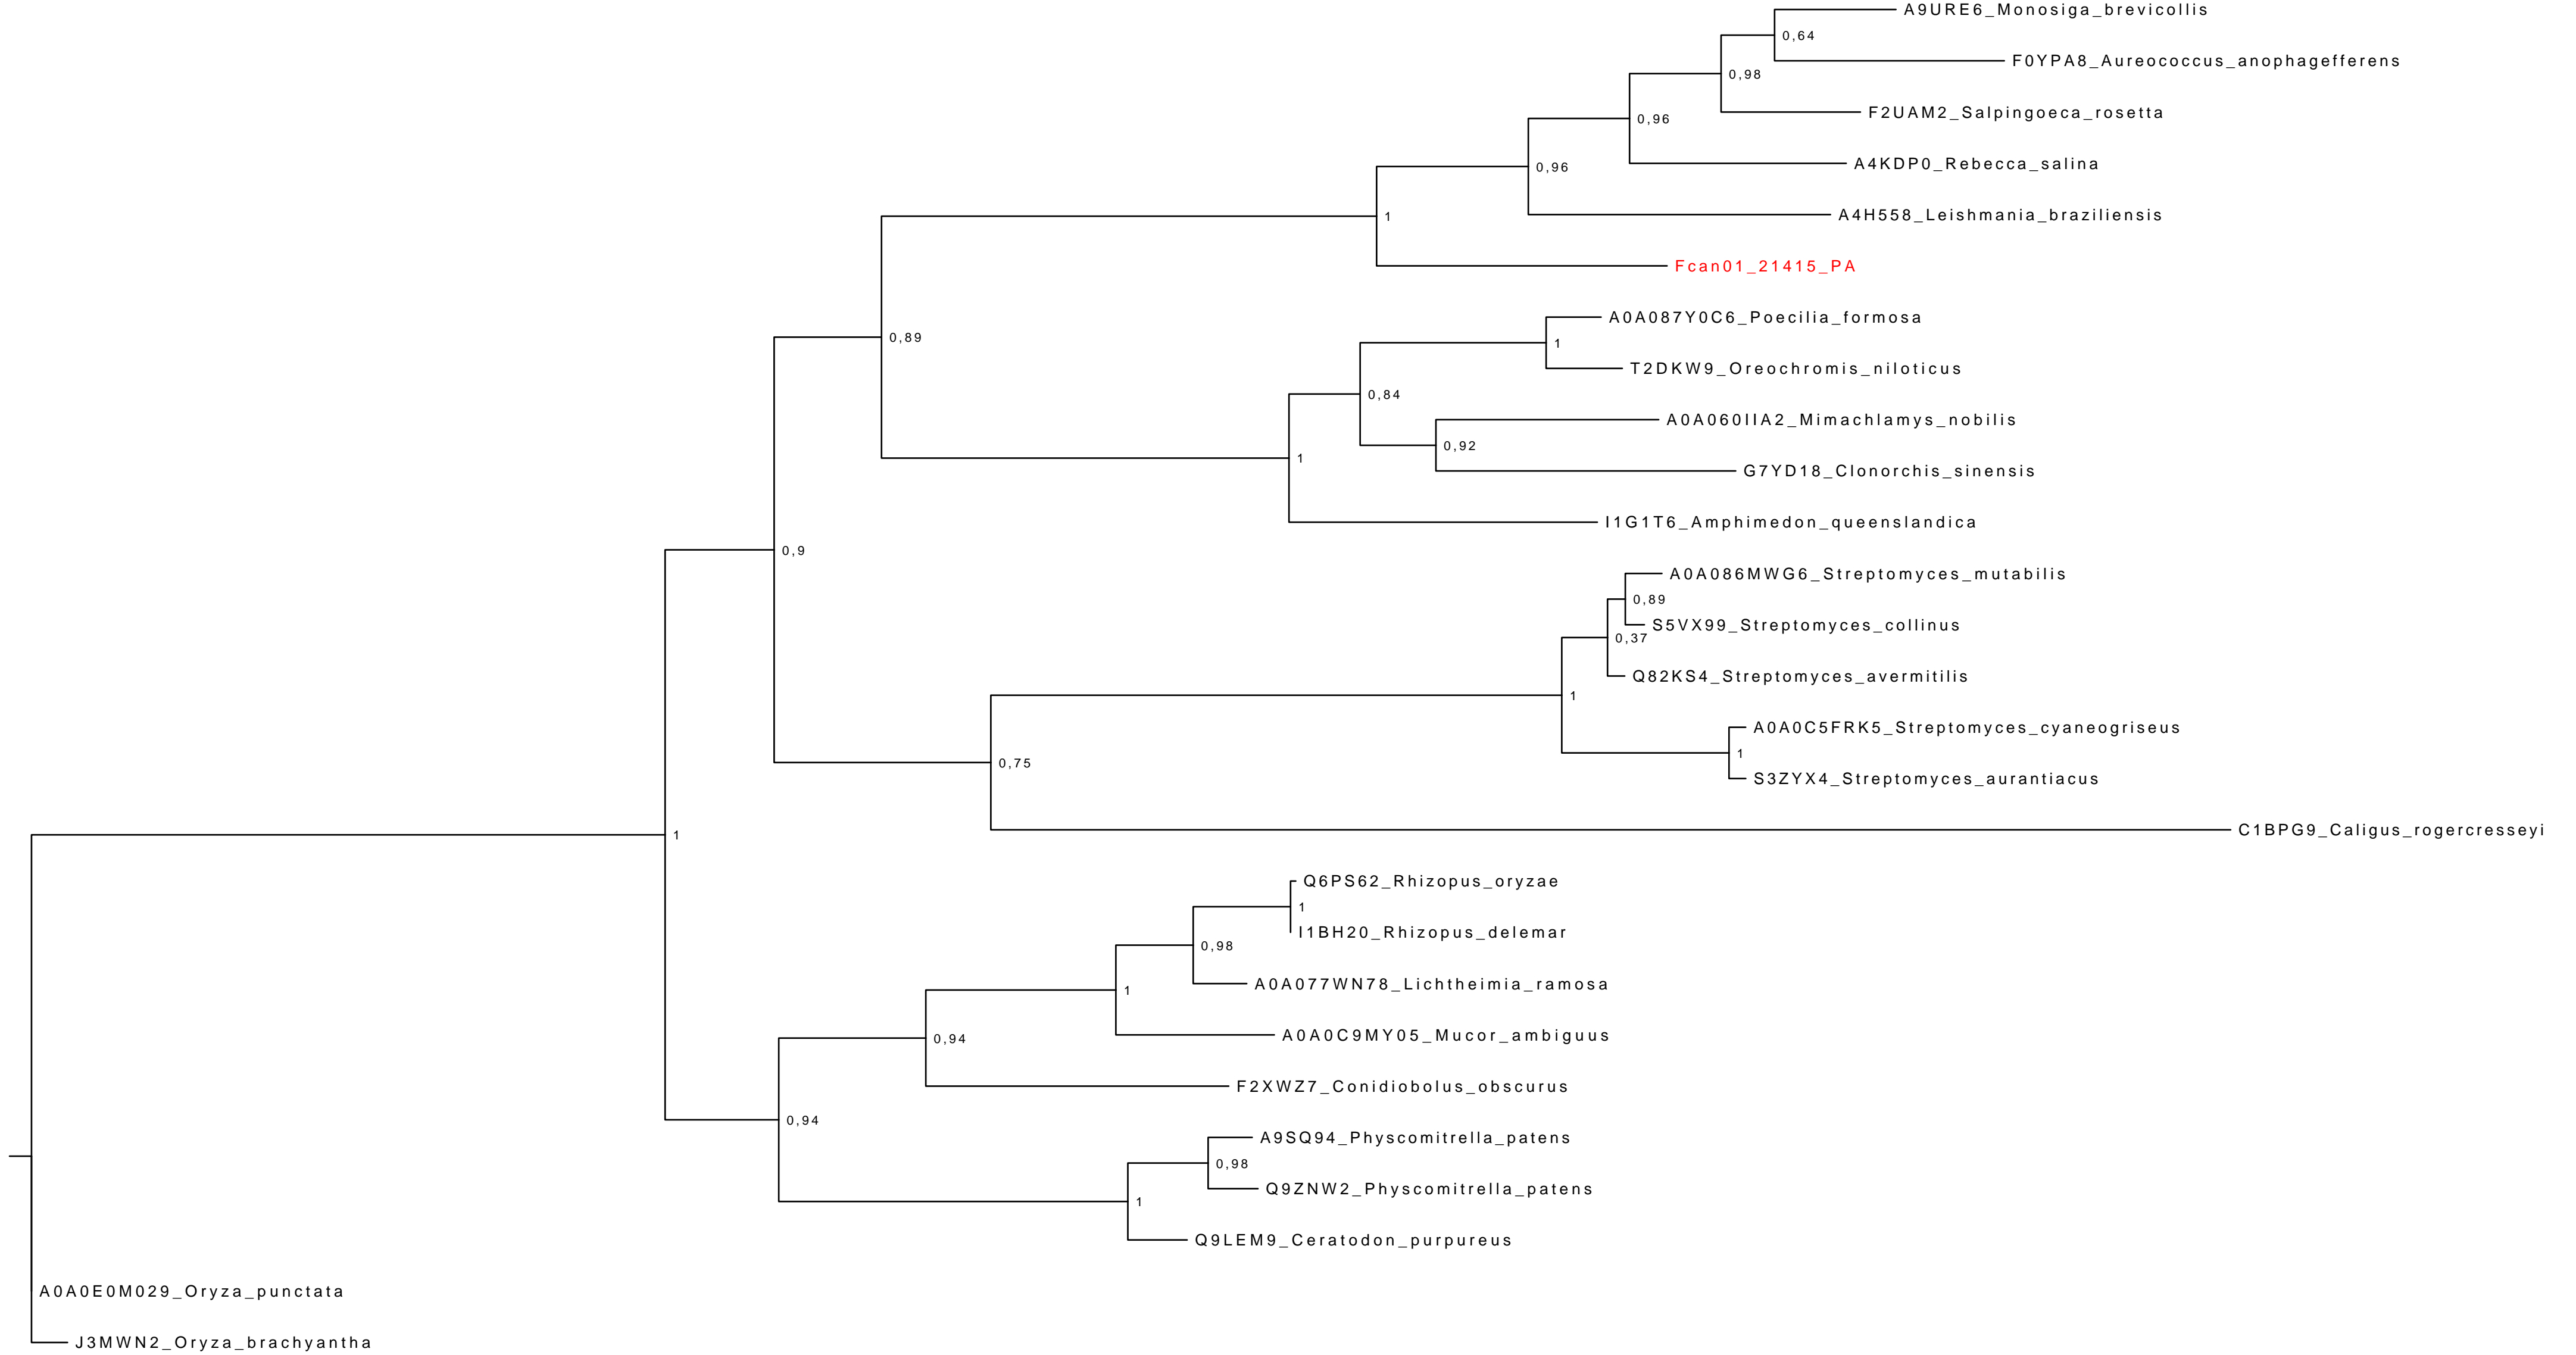

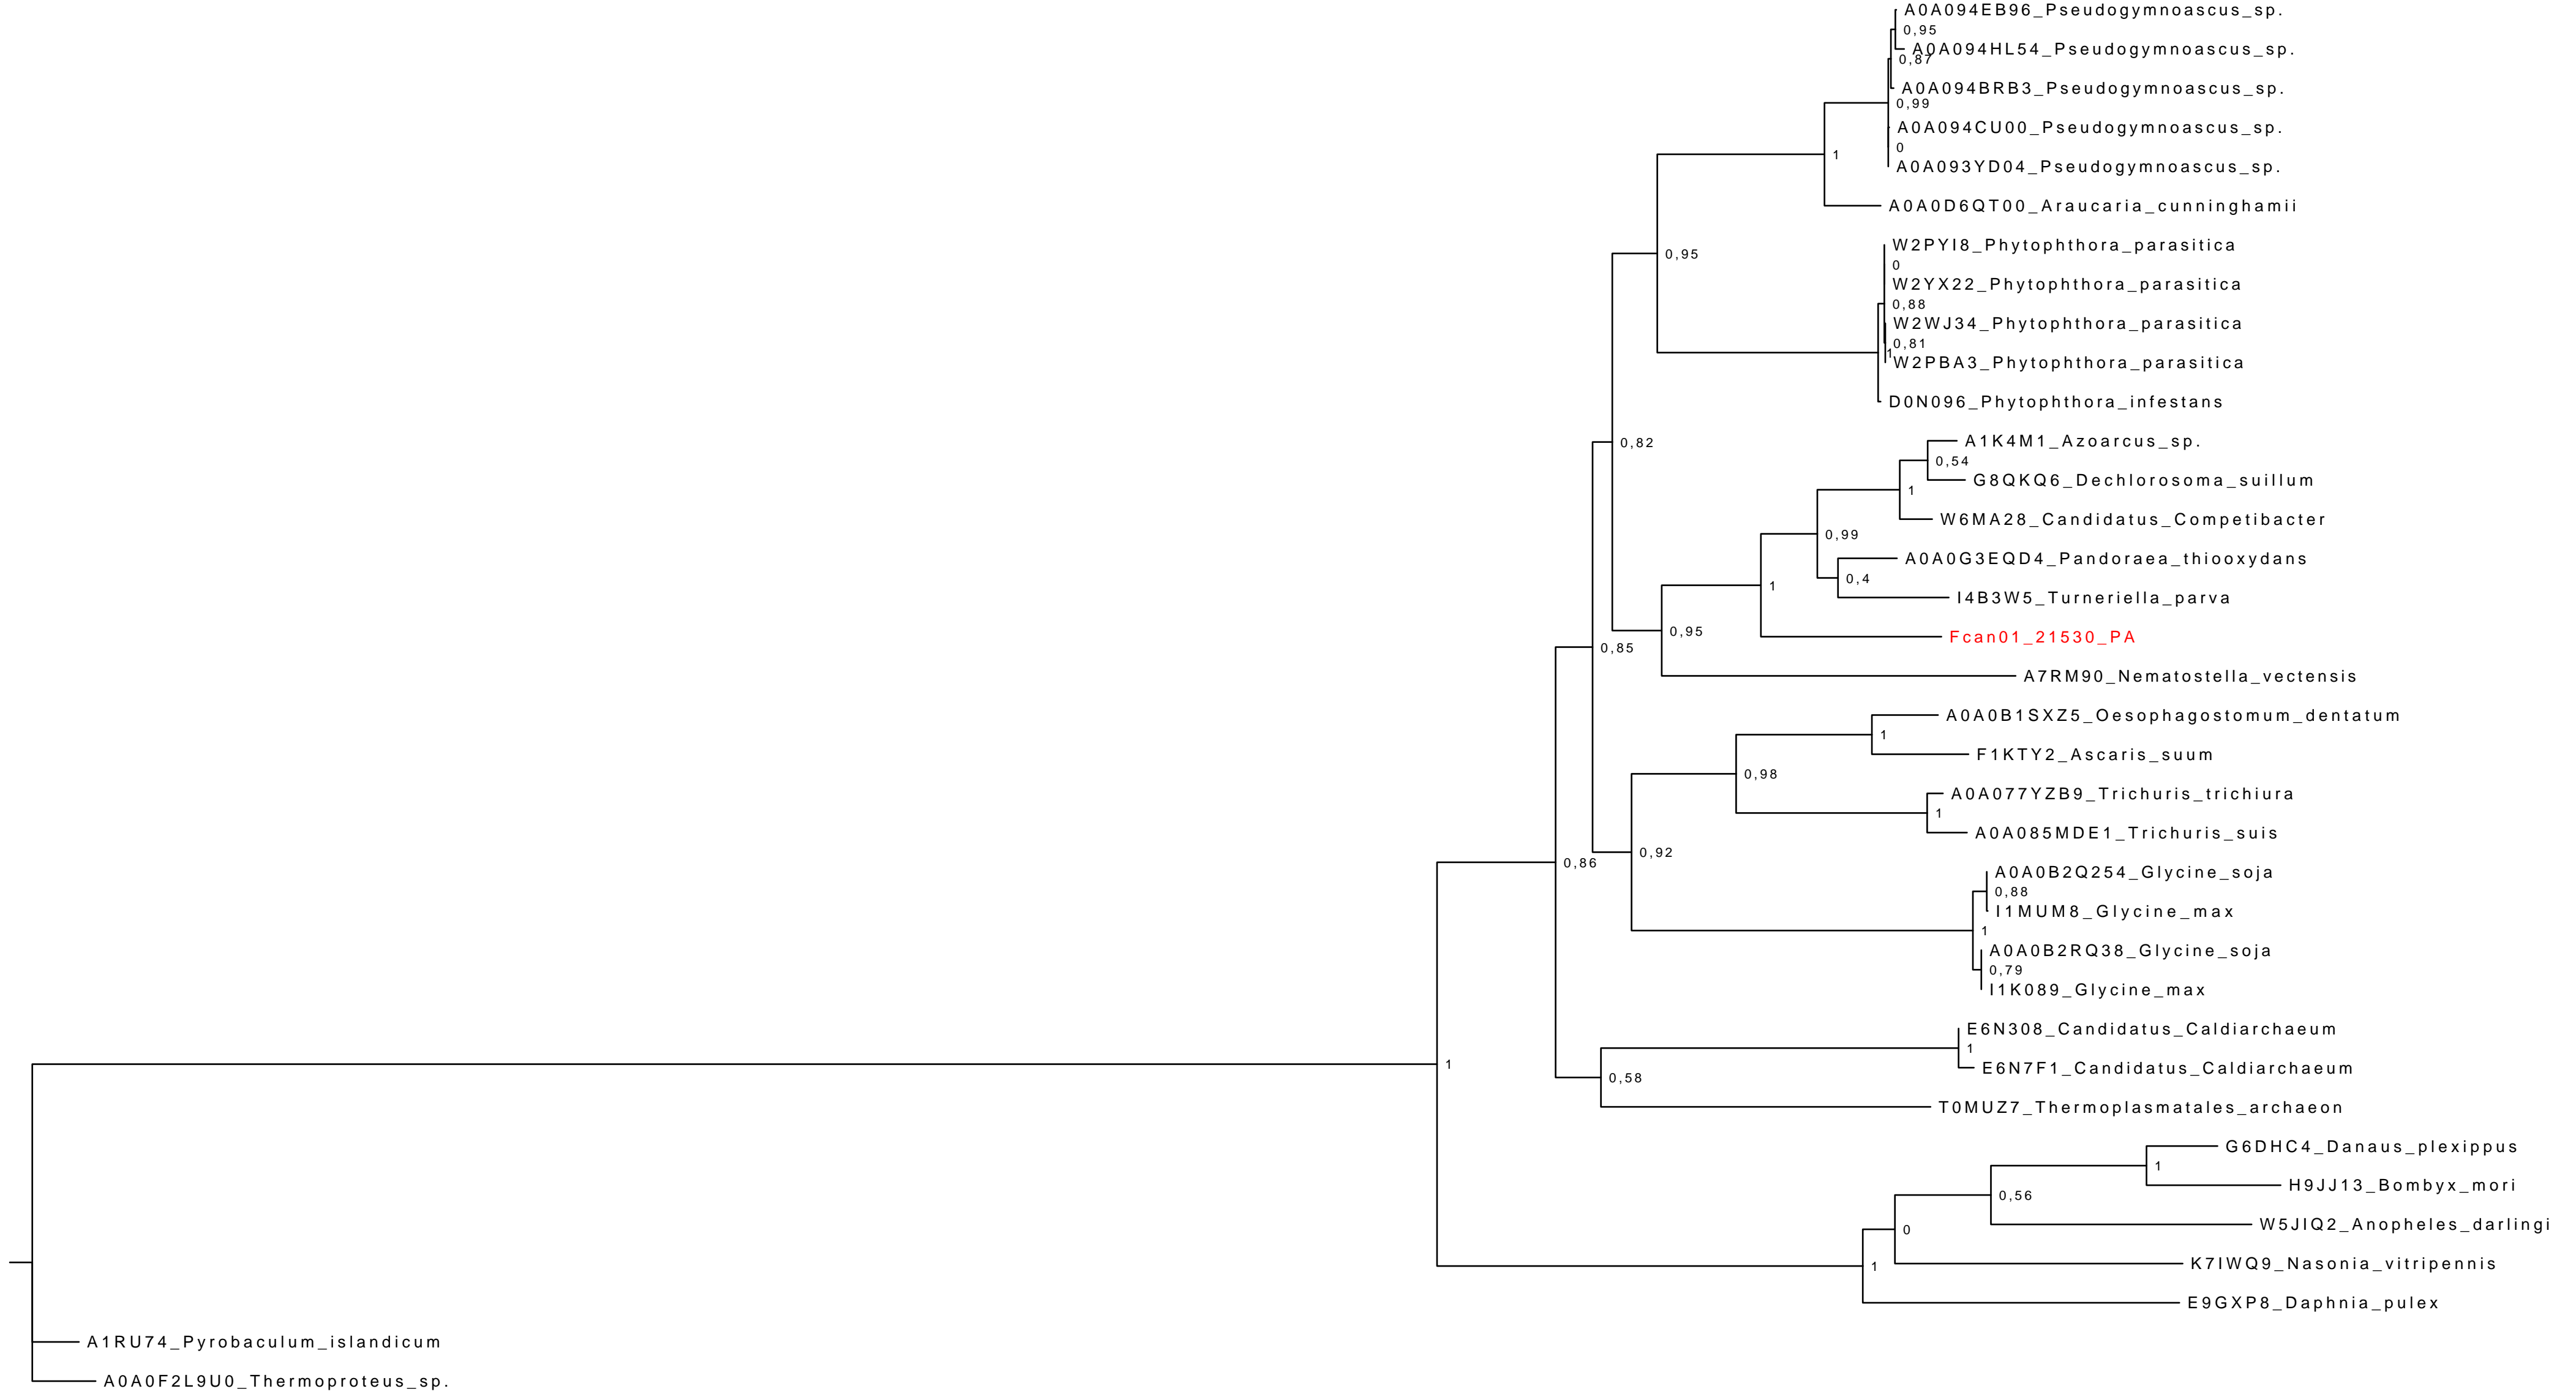

0.5

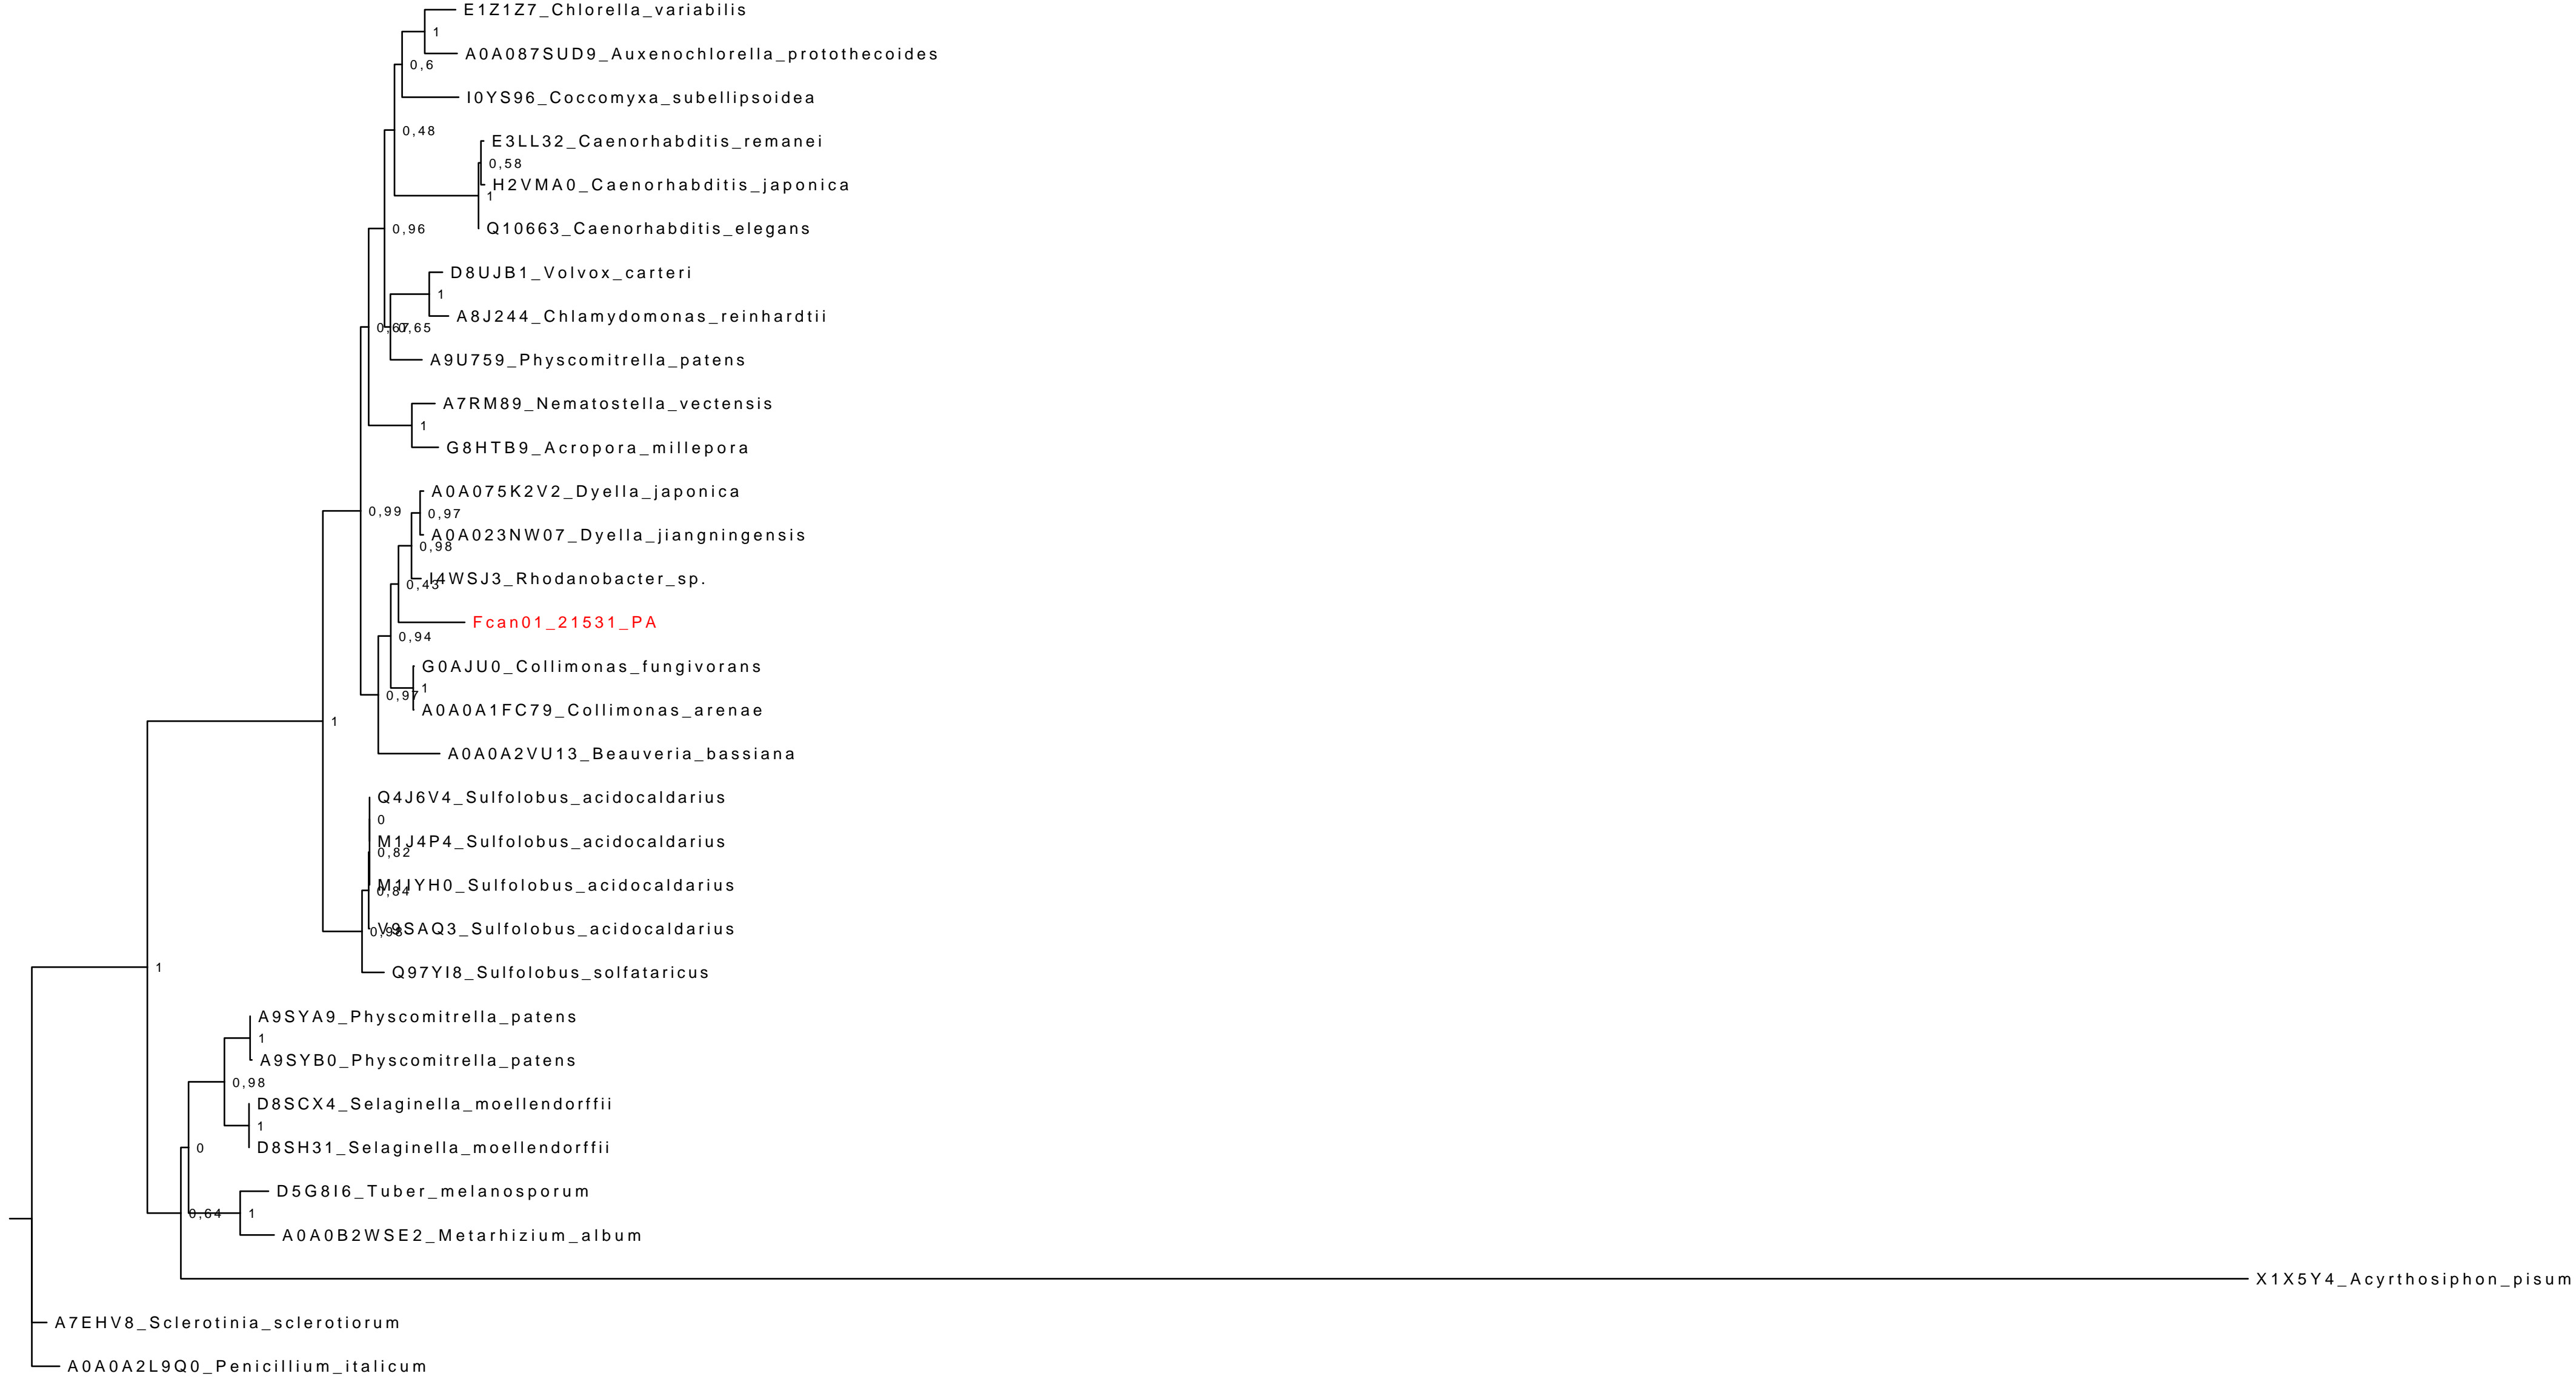

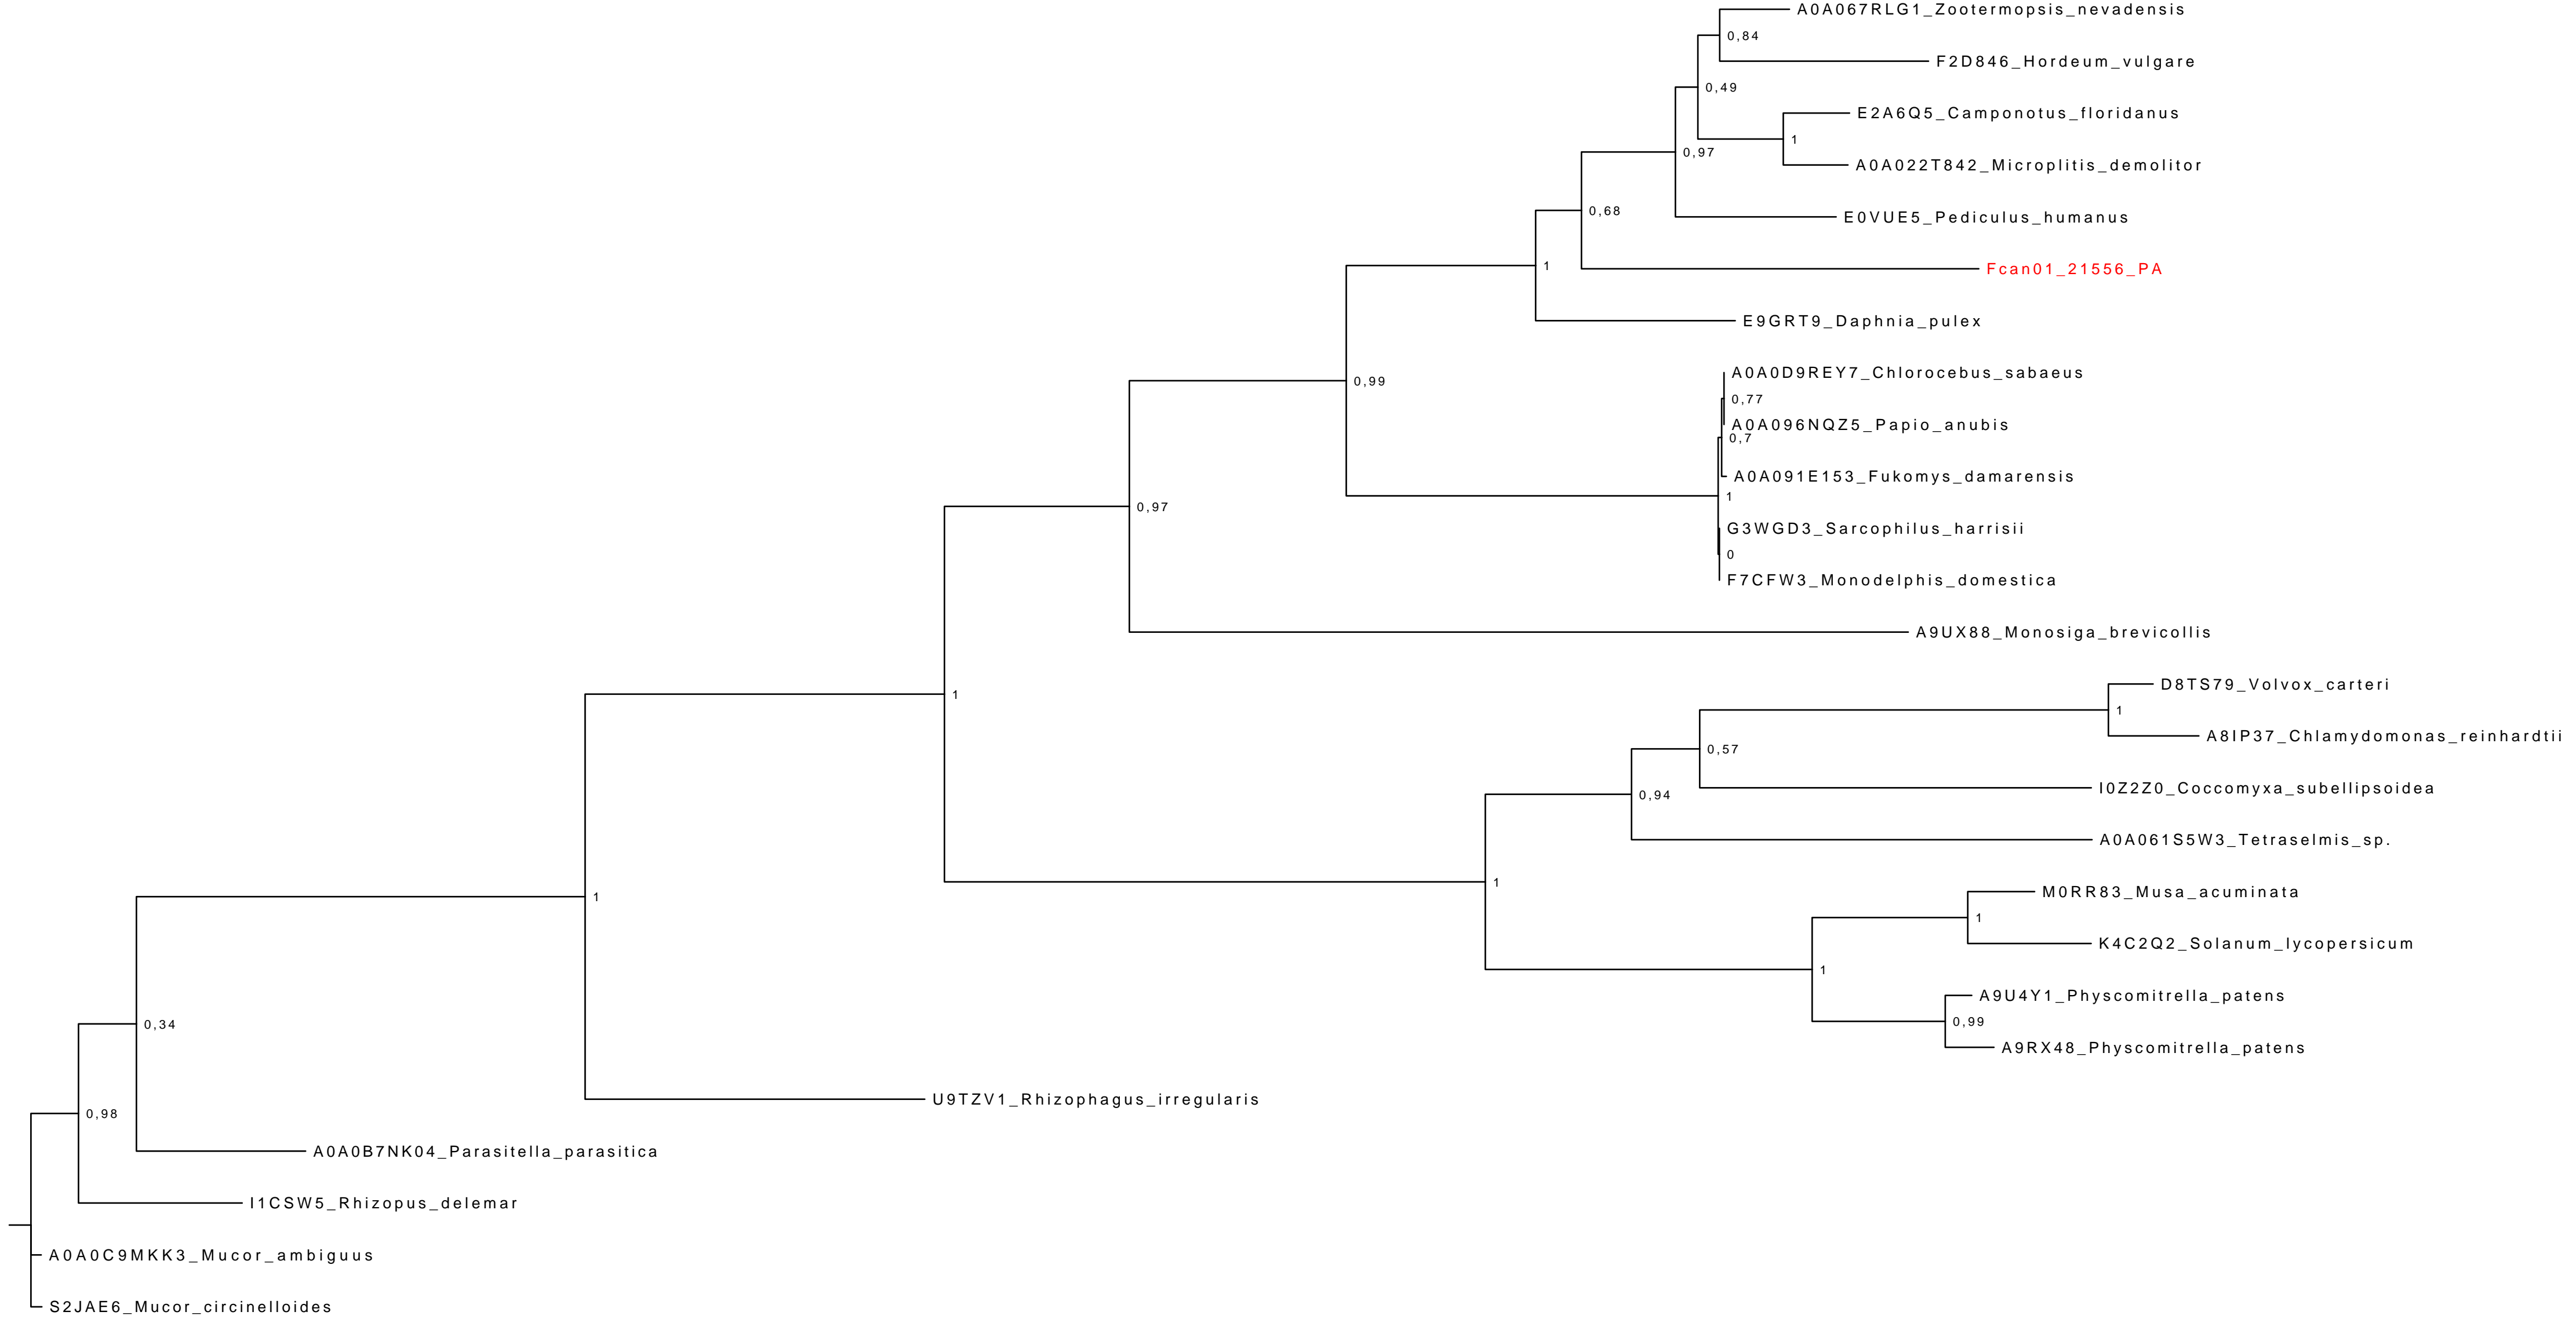

0.3

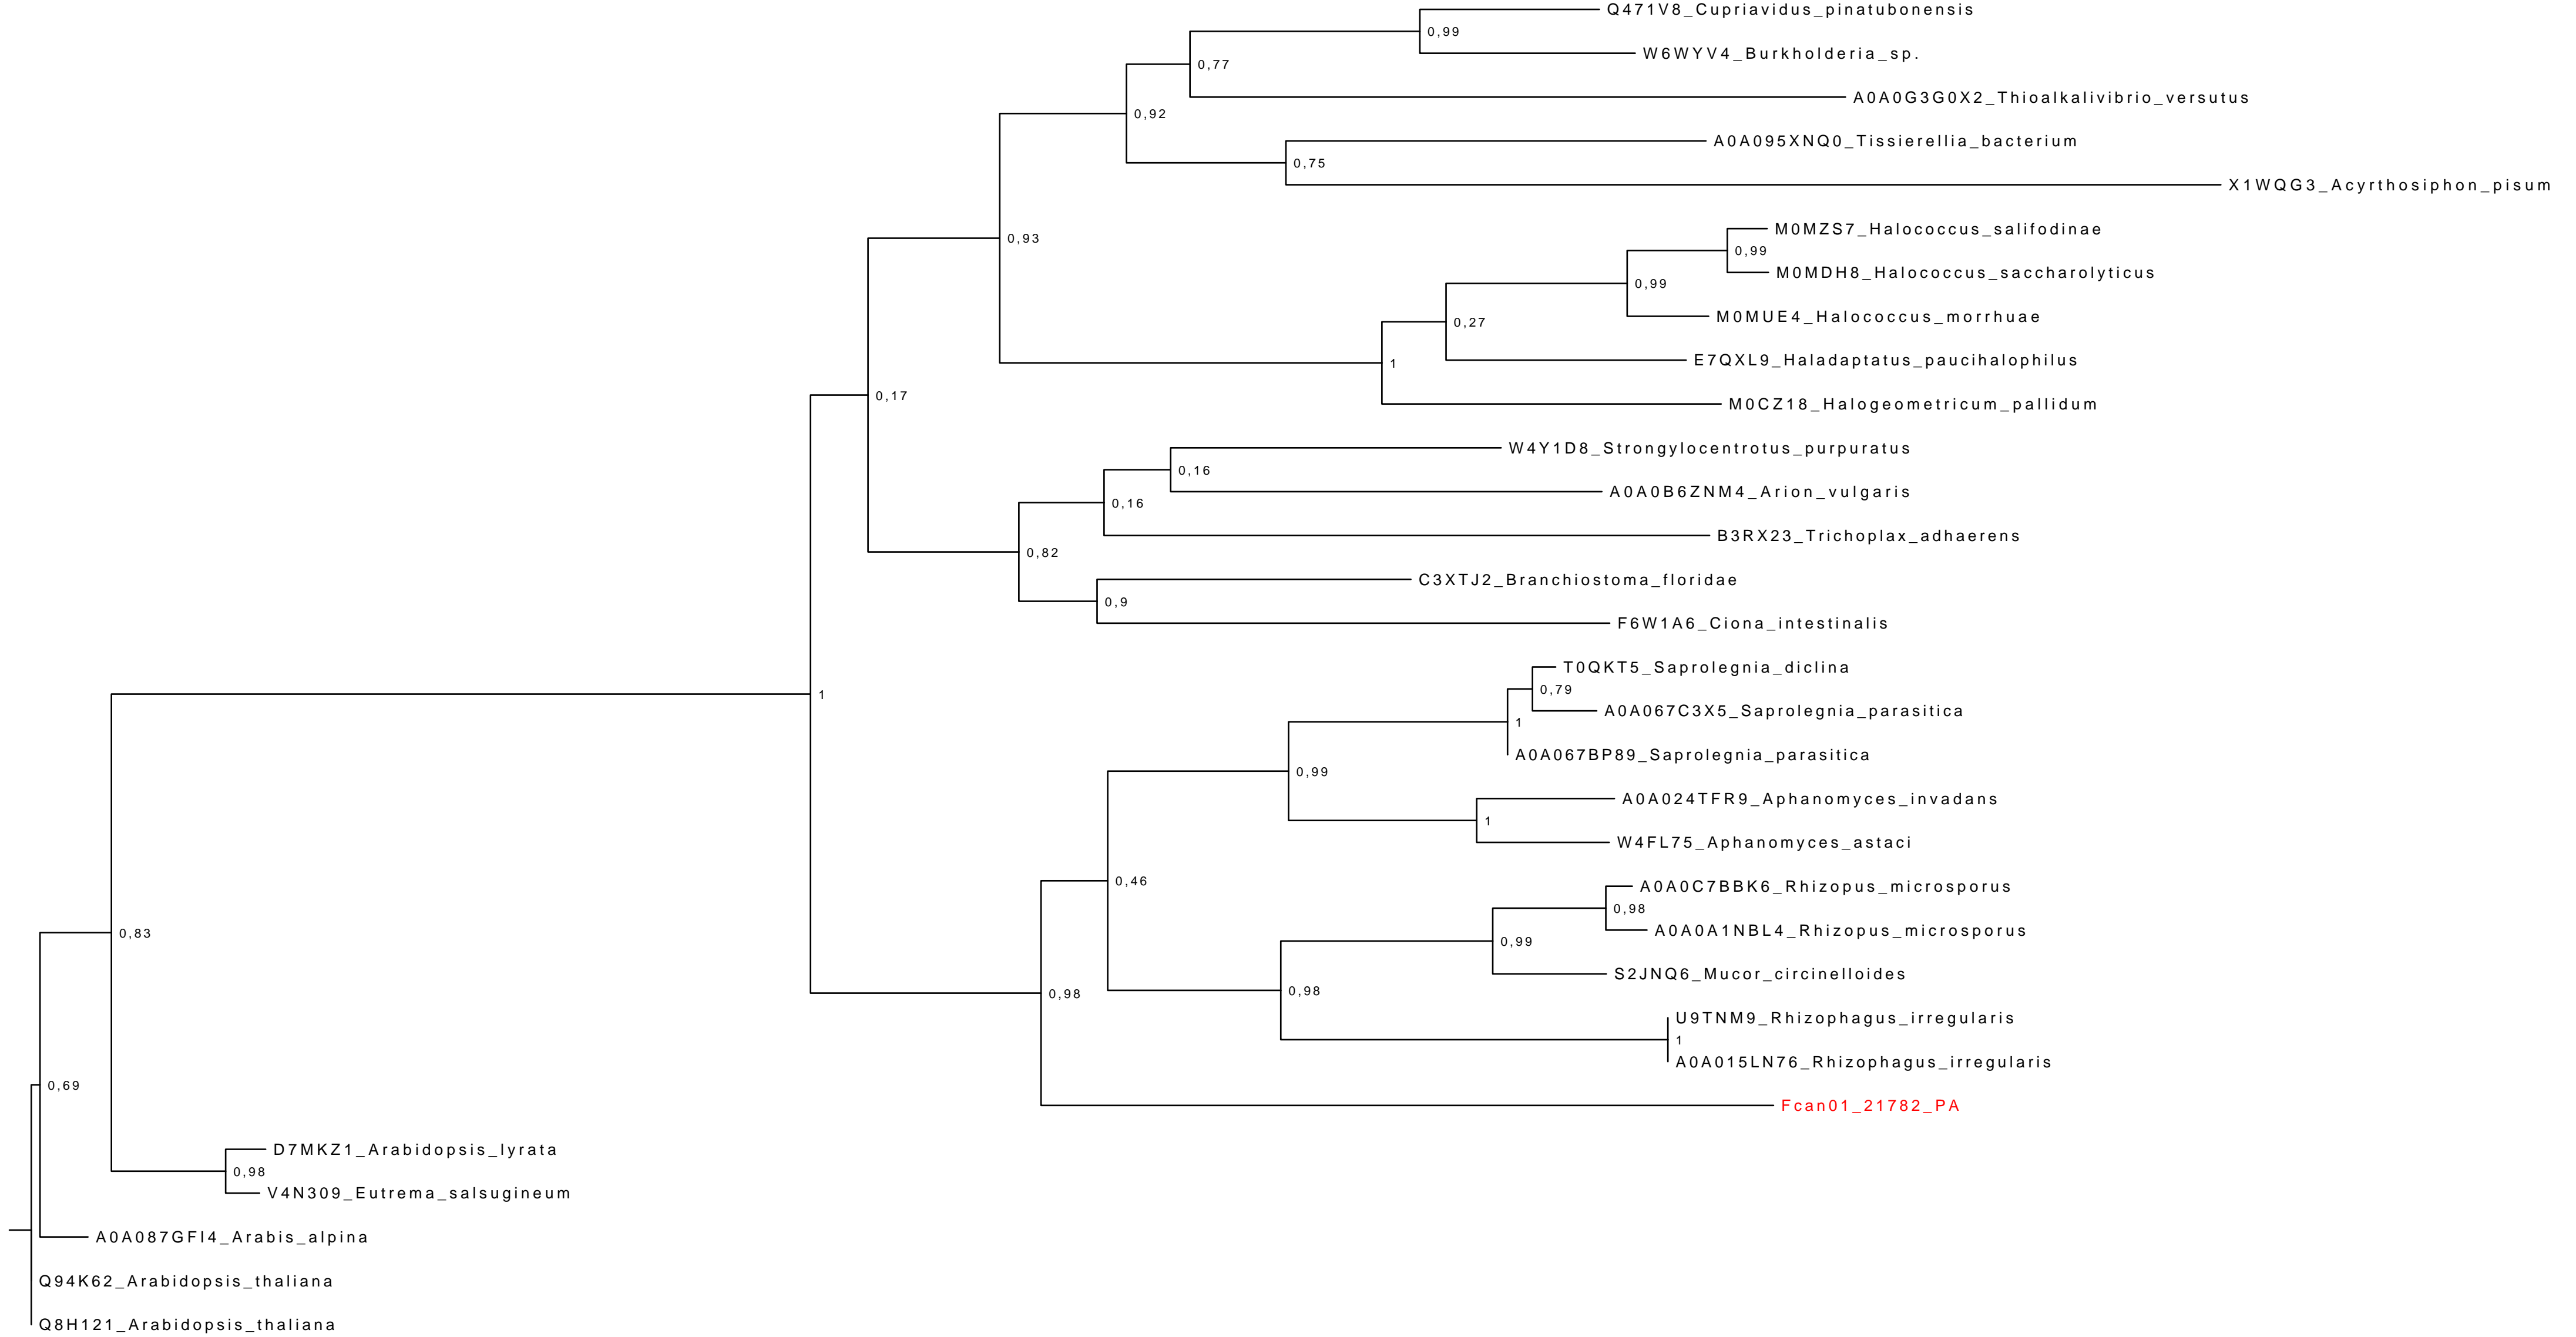

0.2

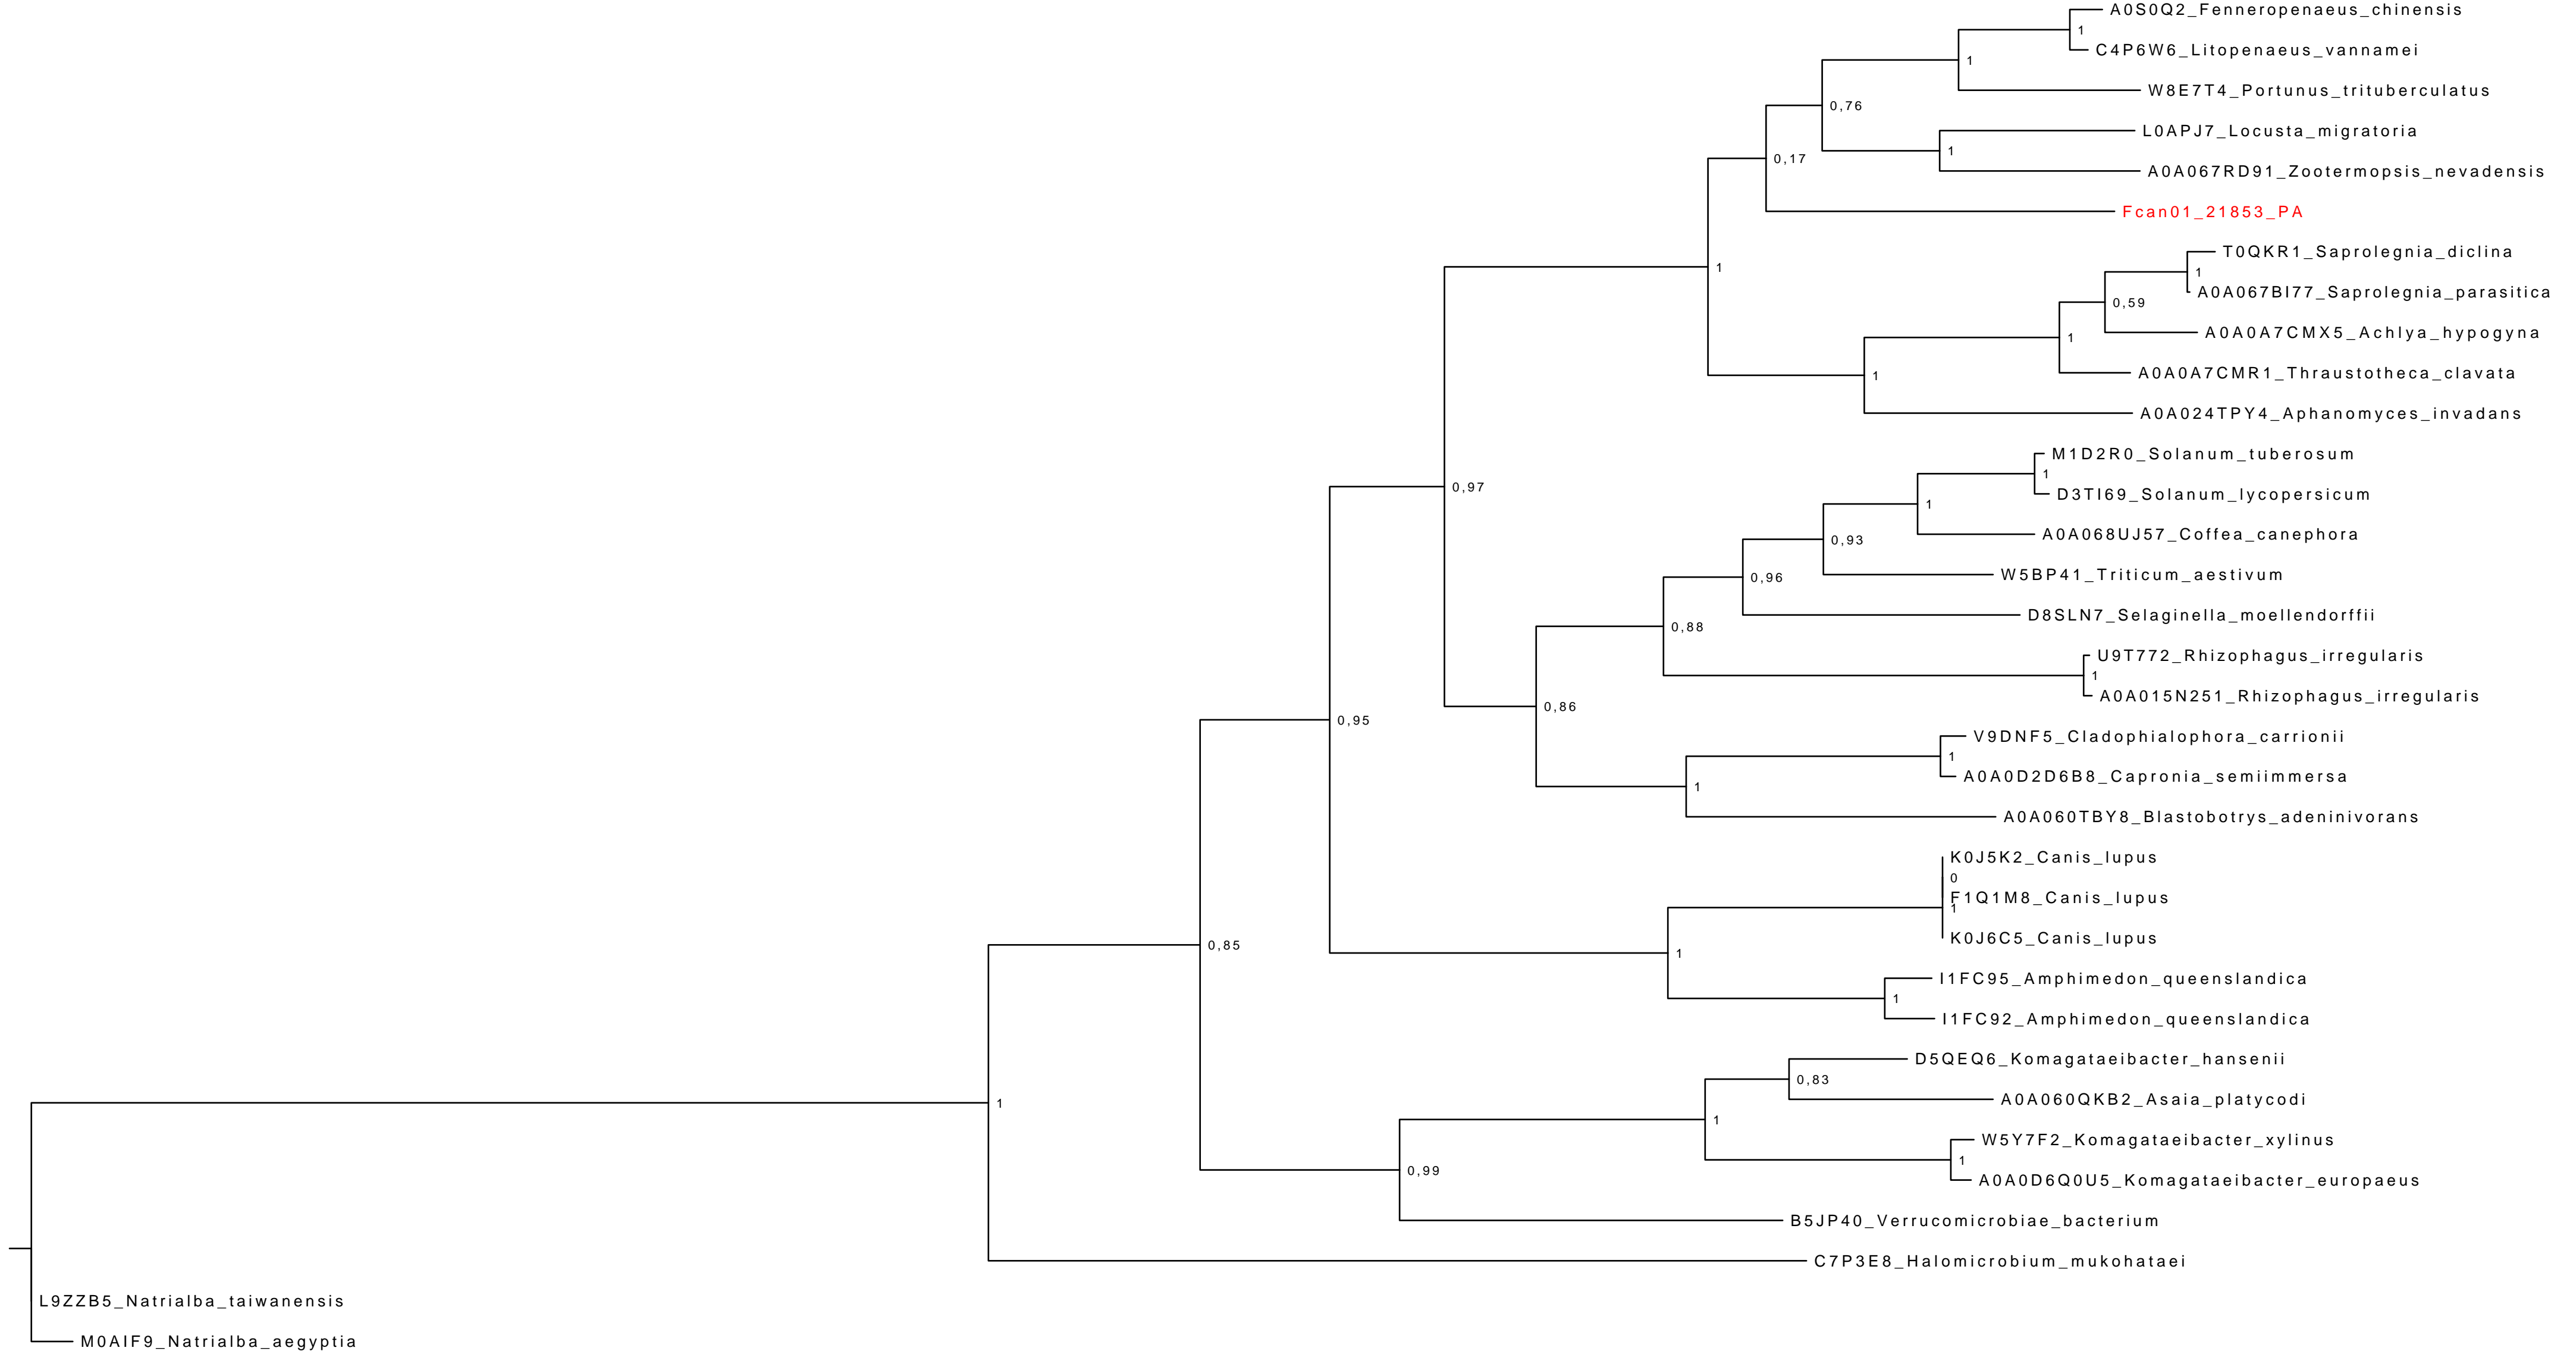

0.5

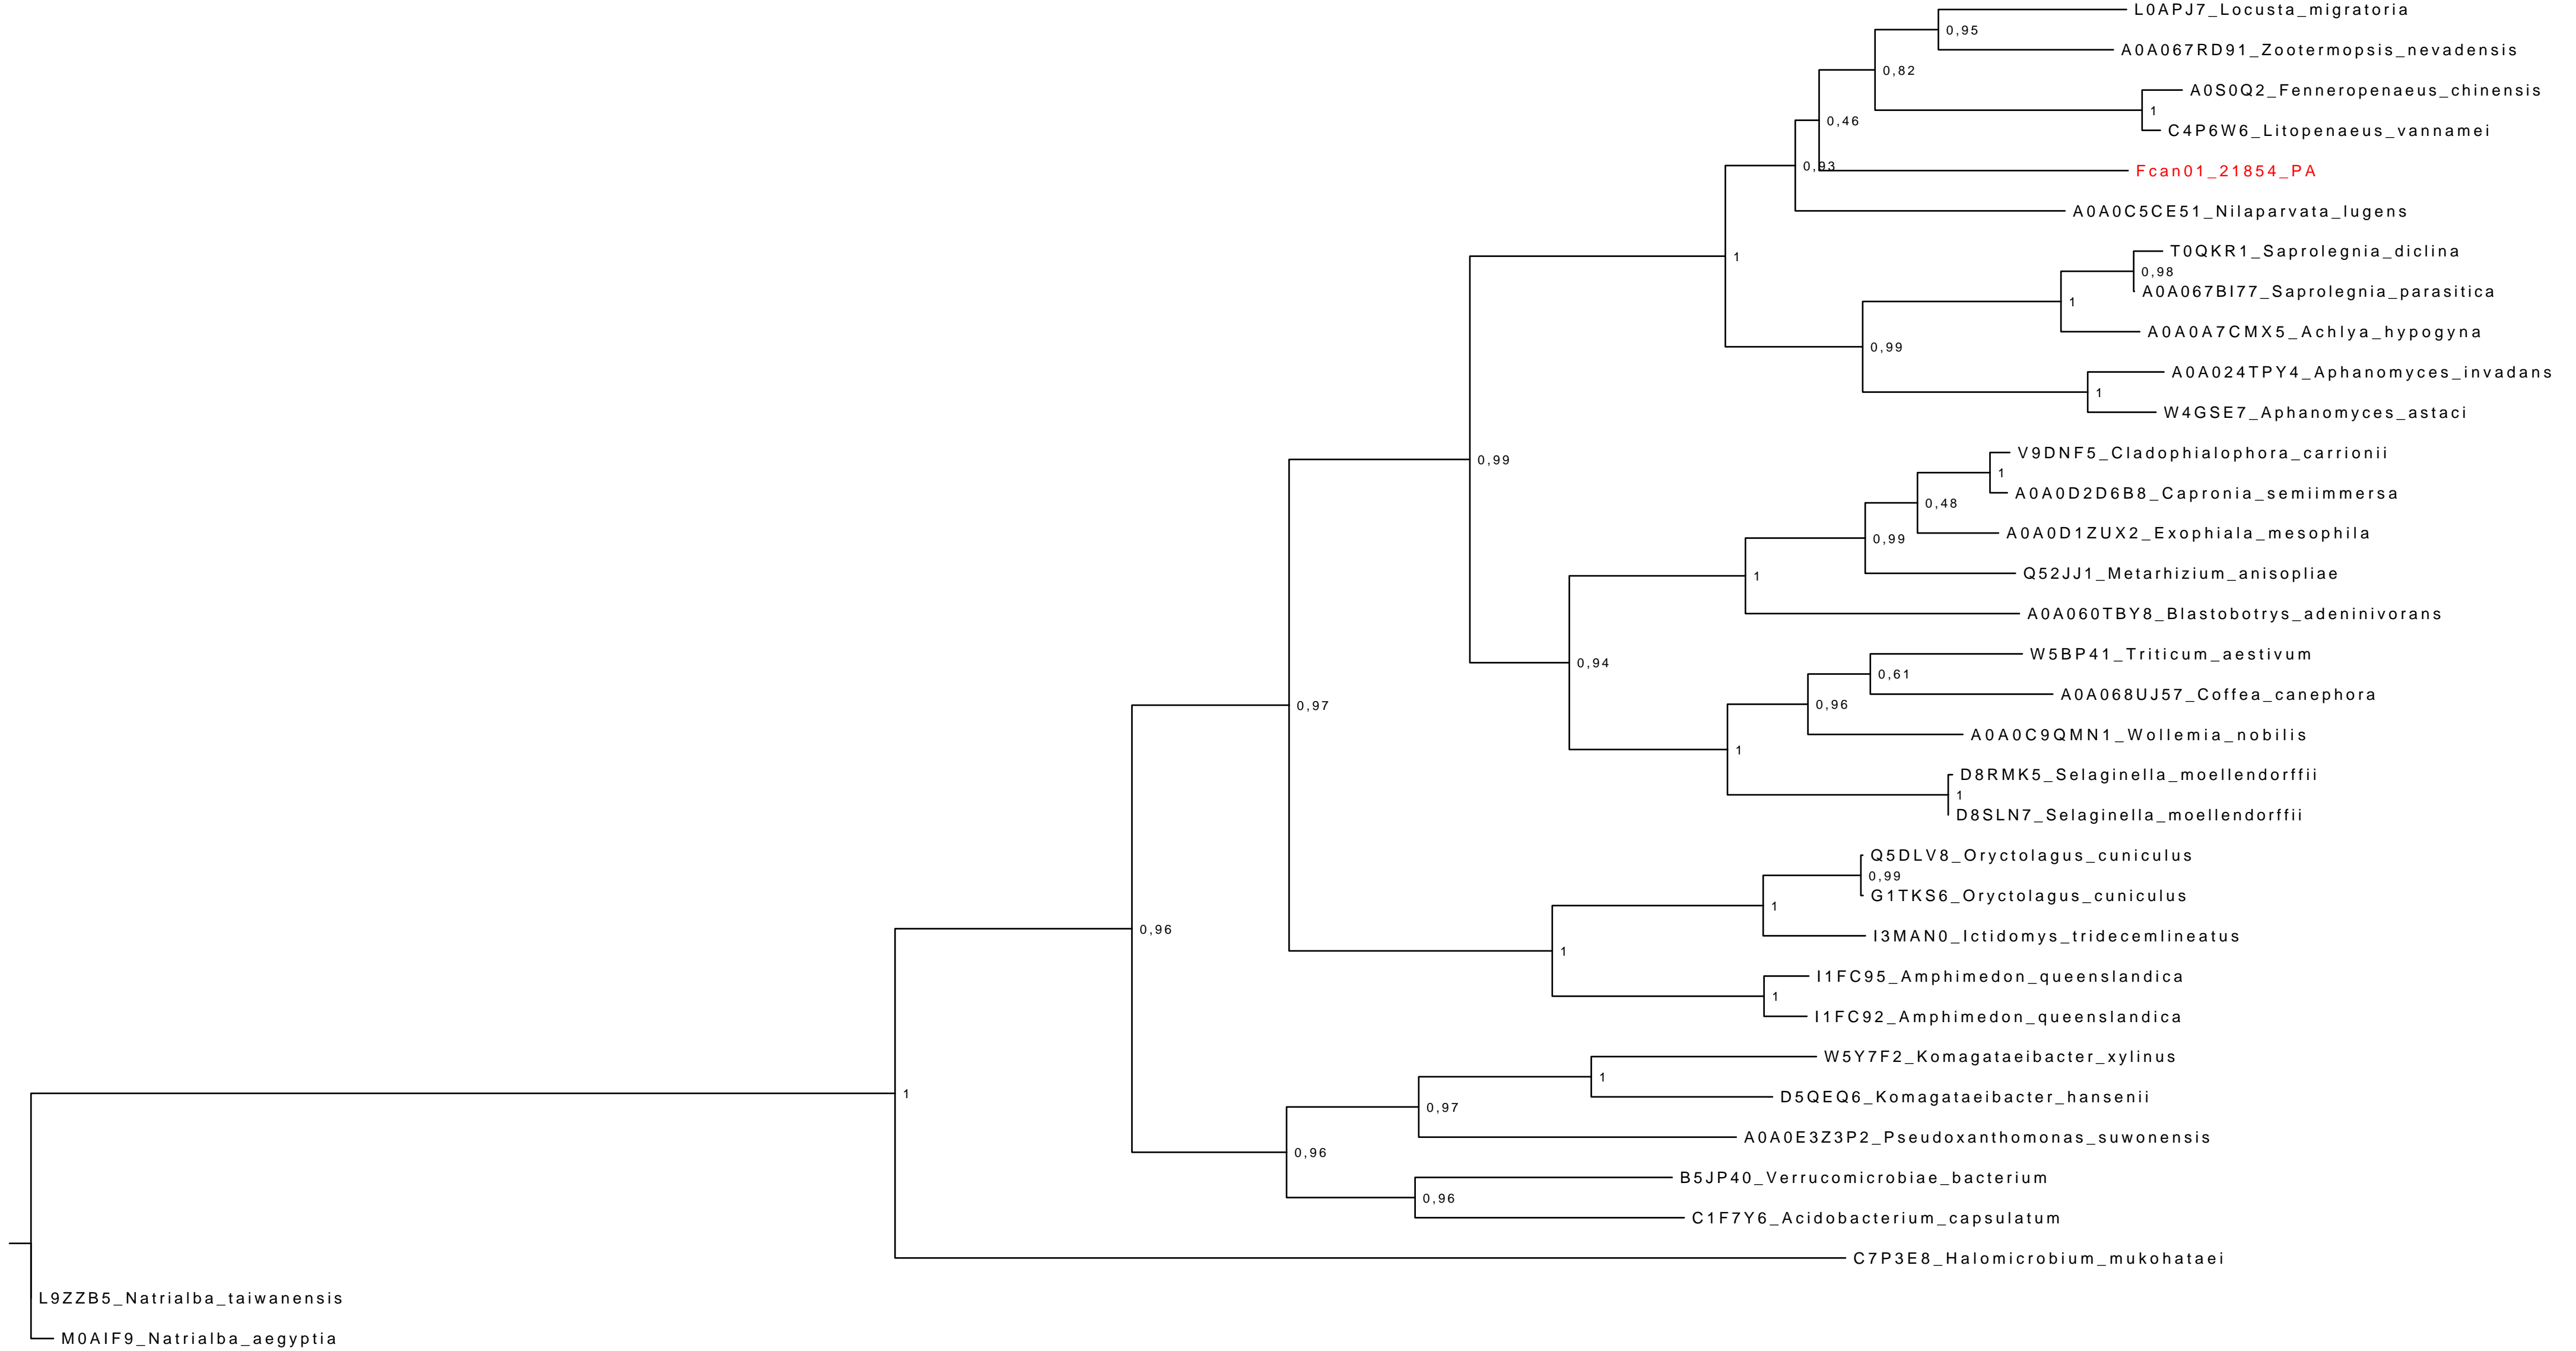

0.5

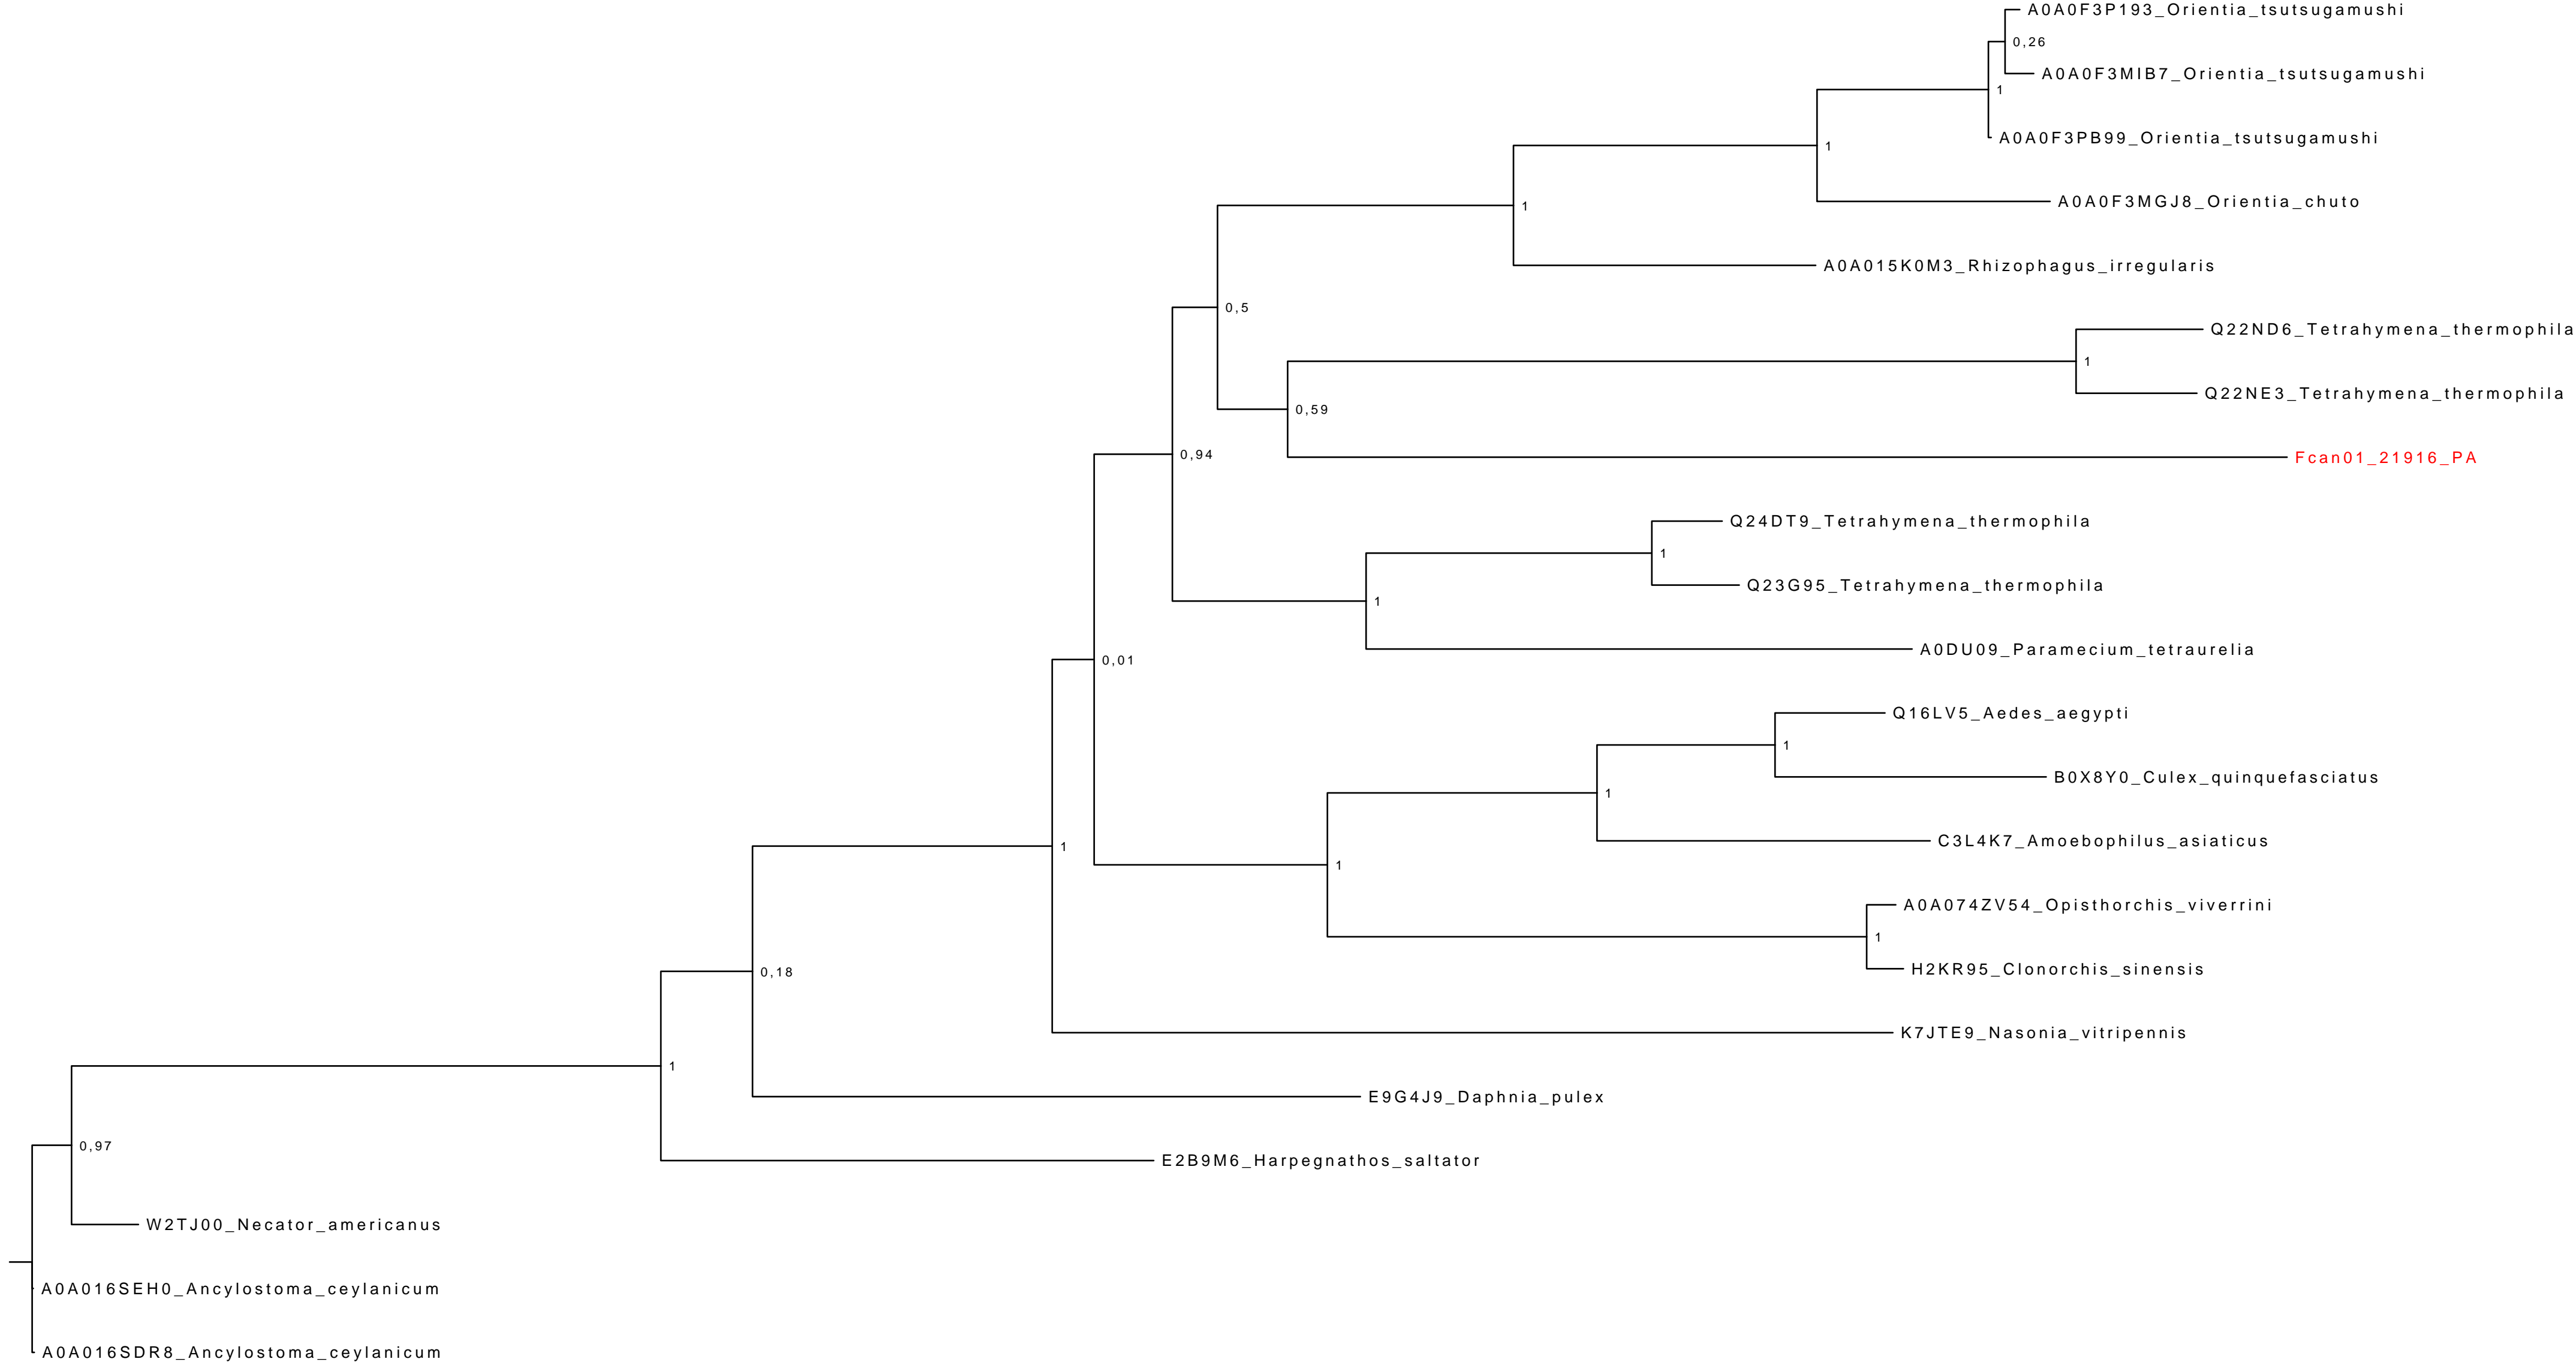

0.7



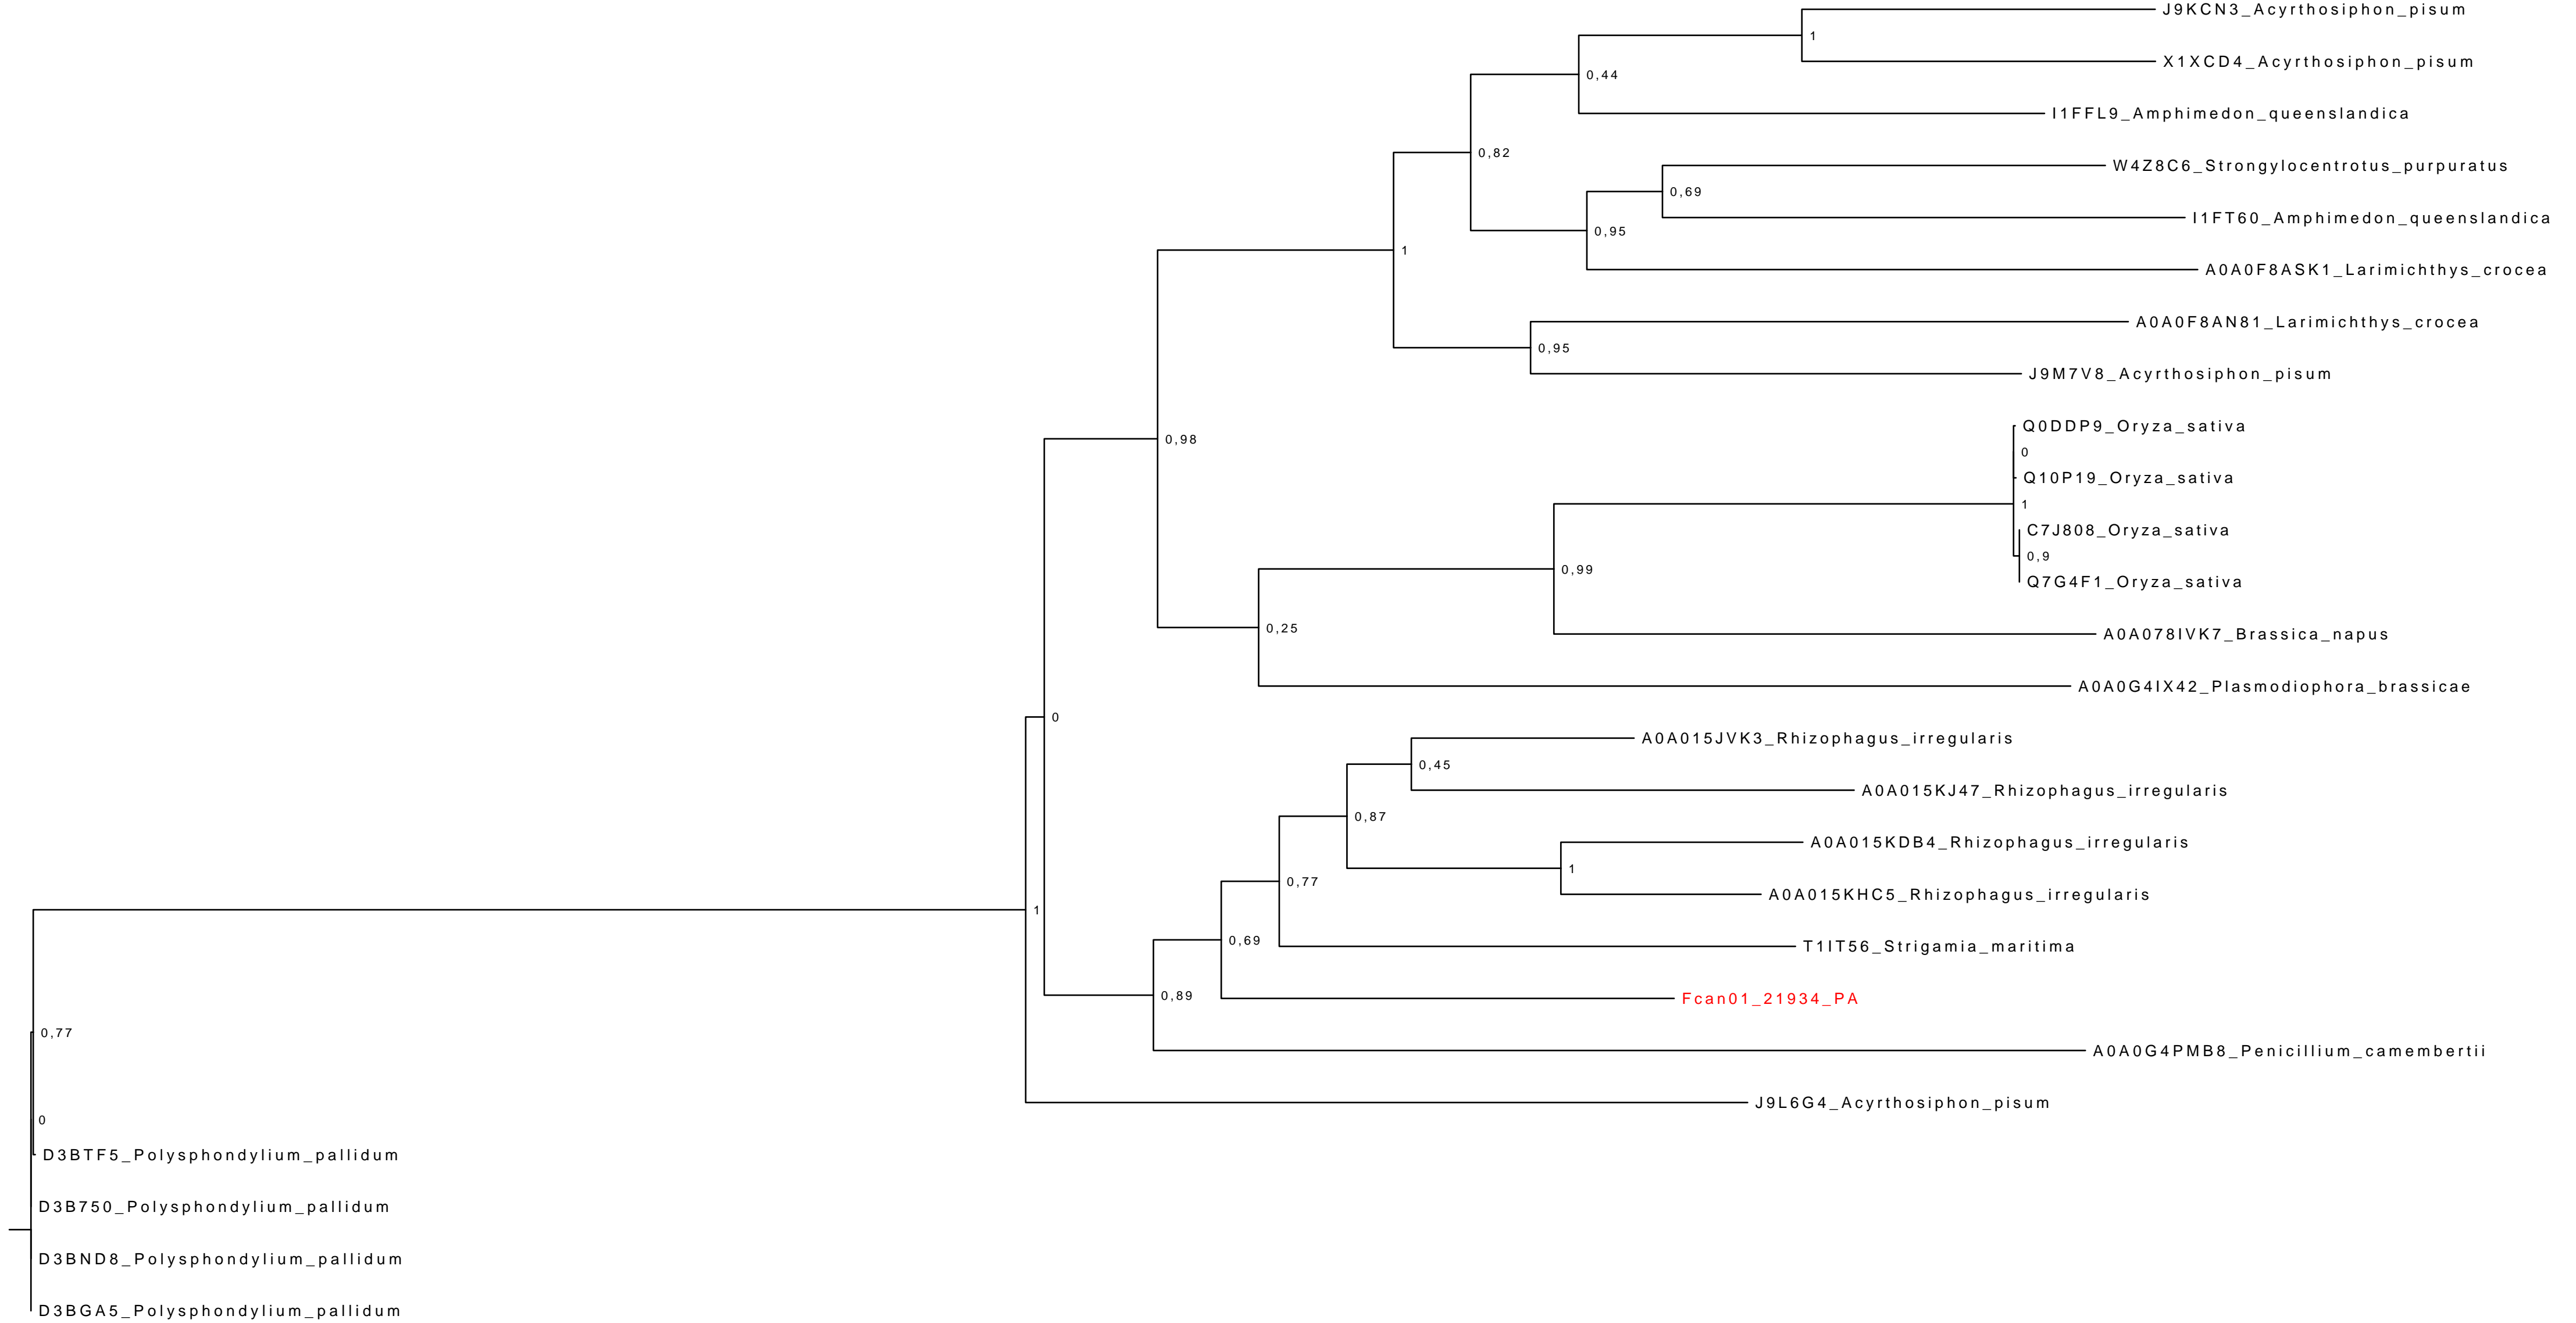

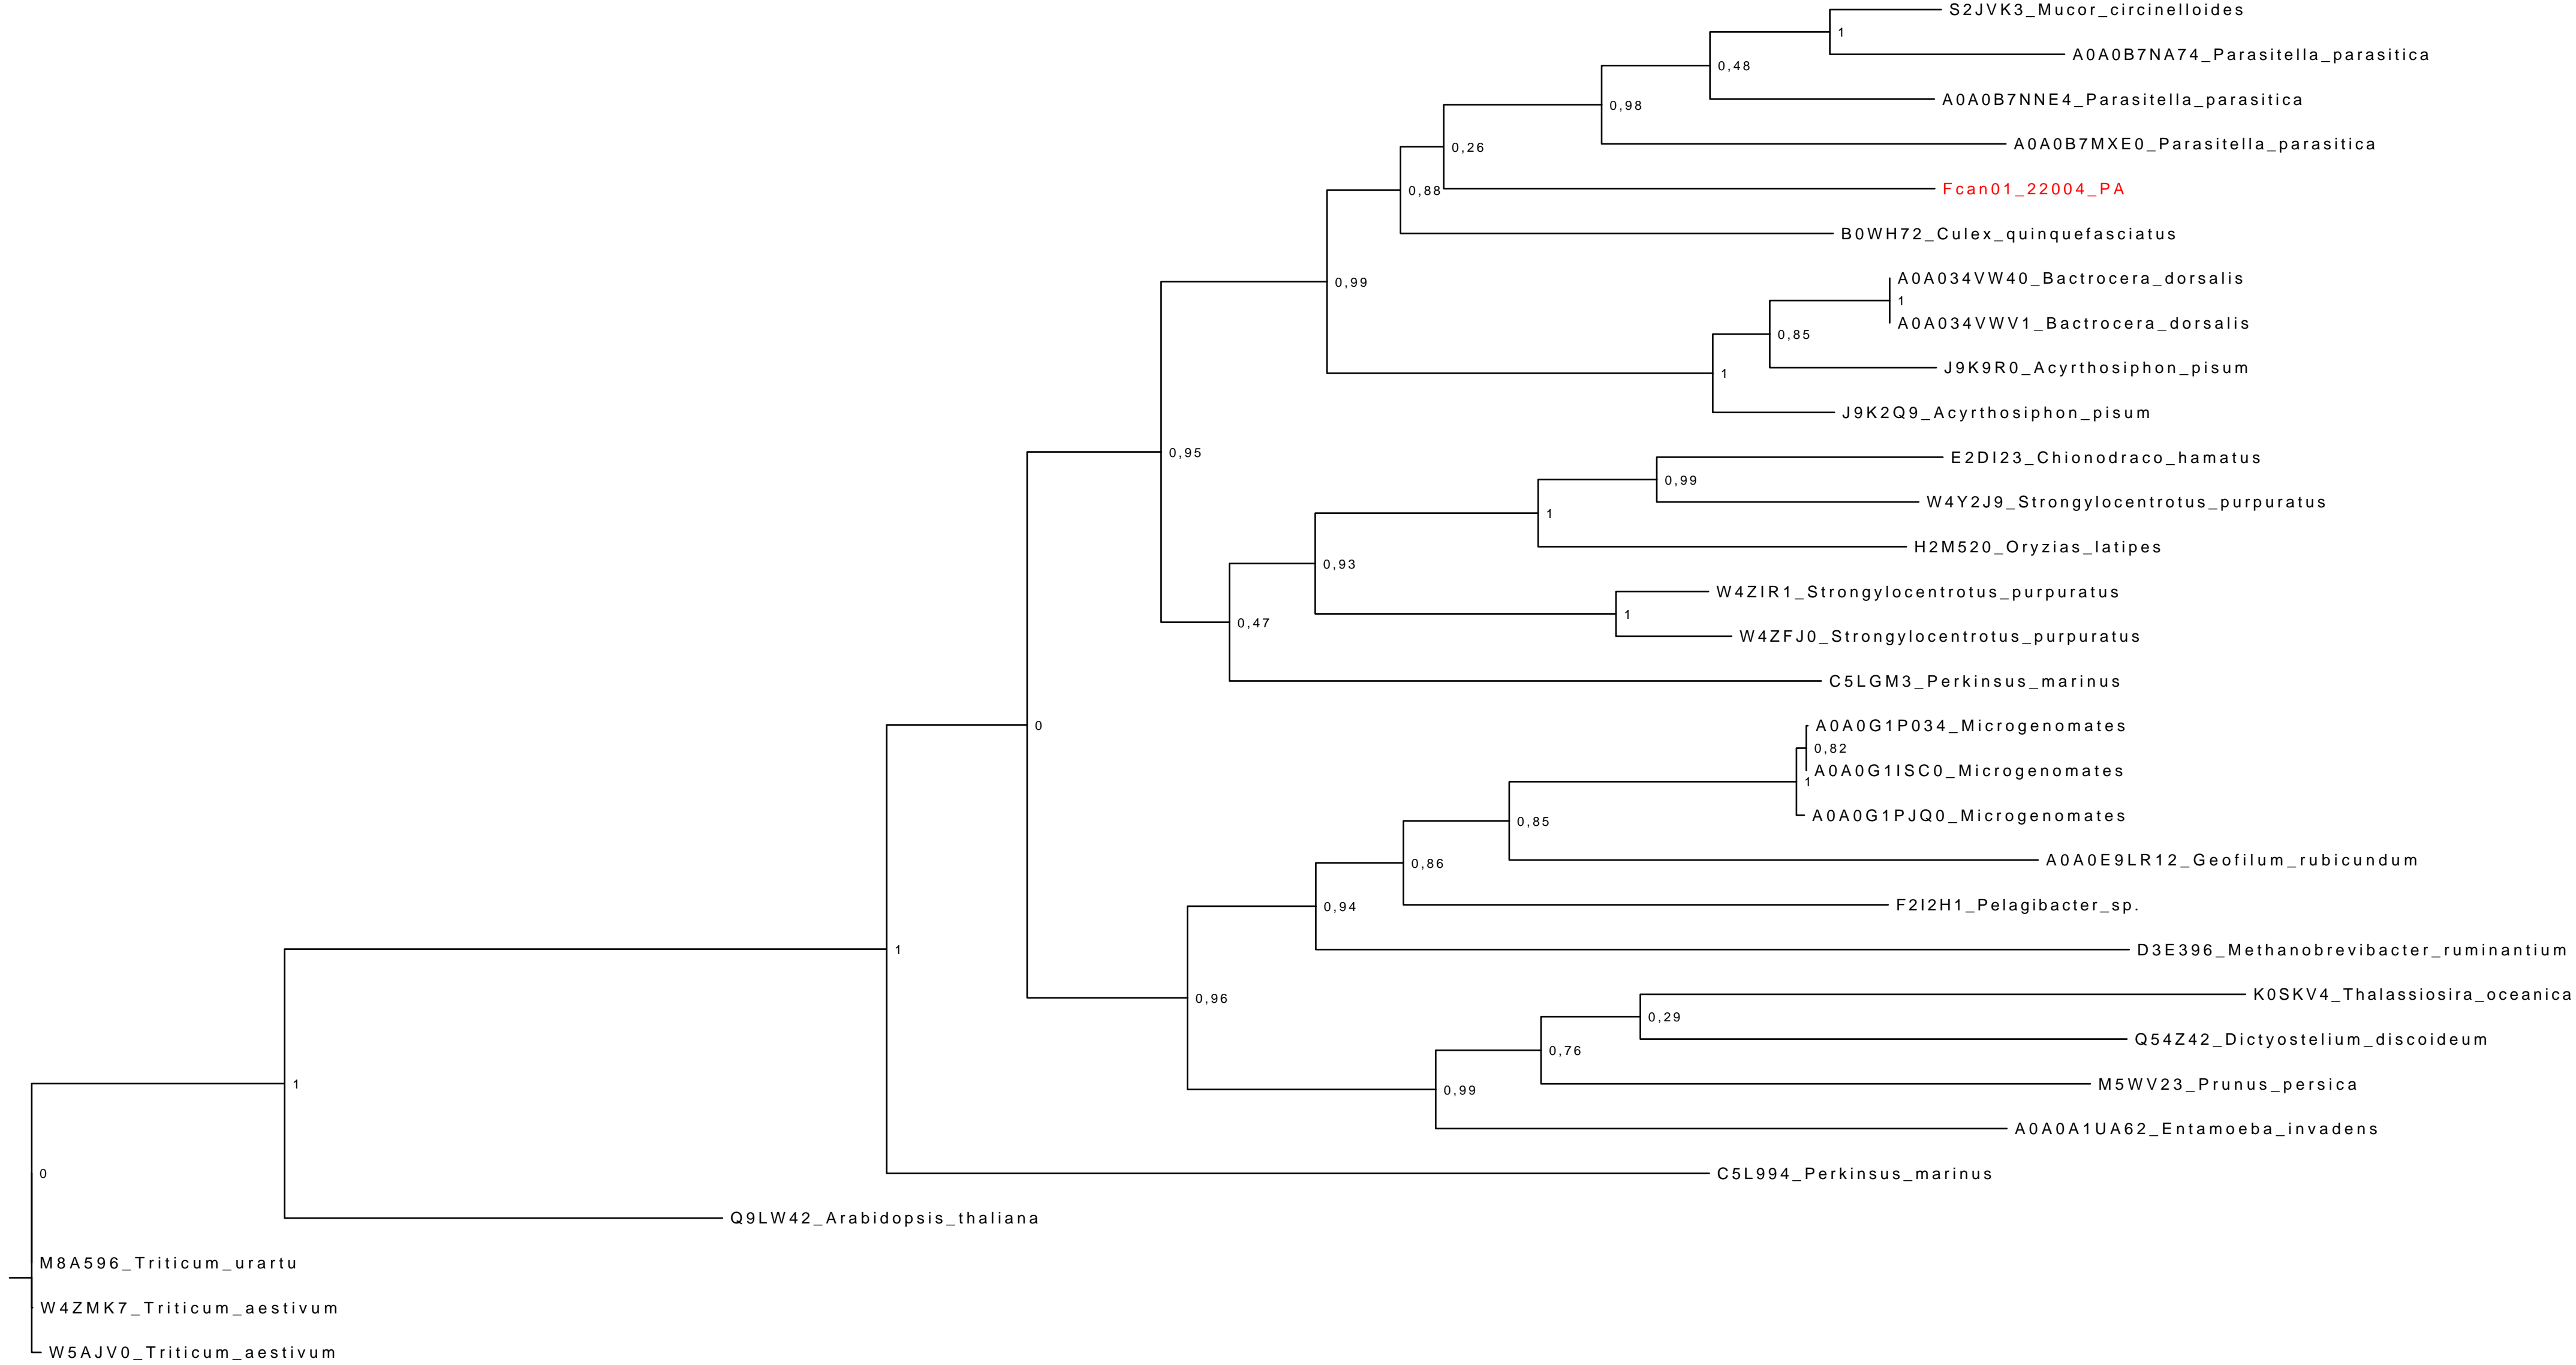

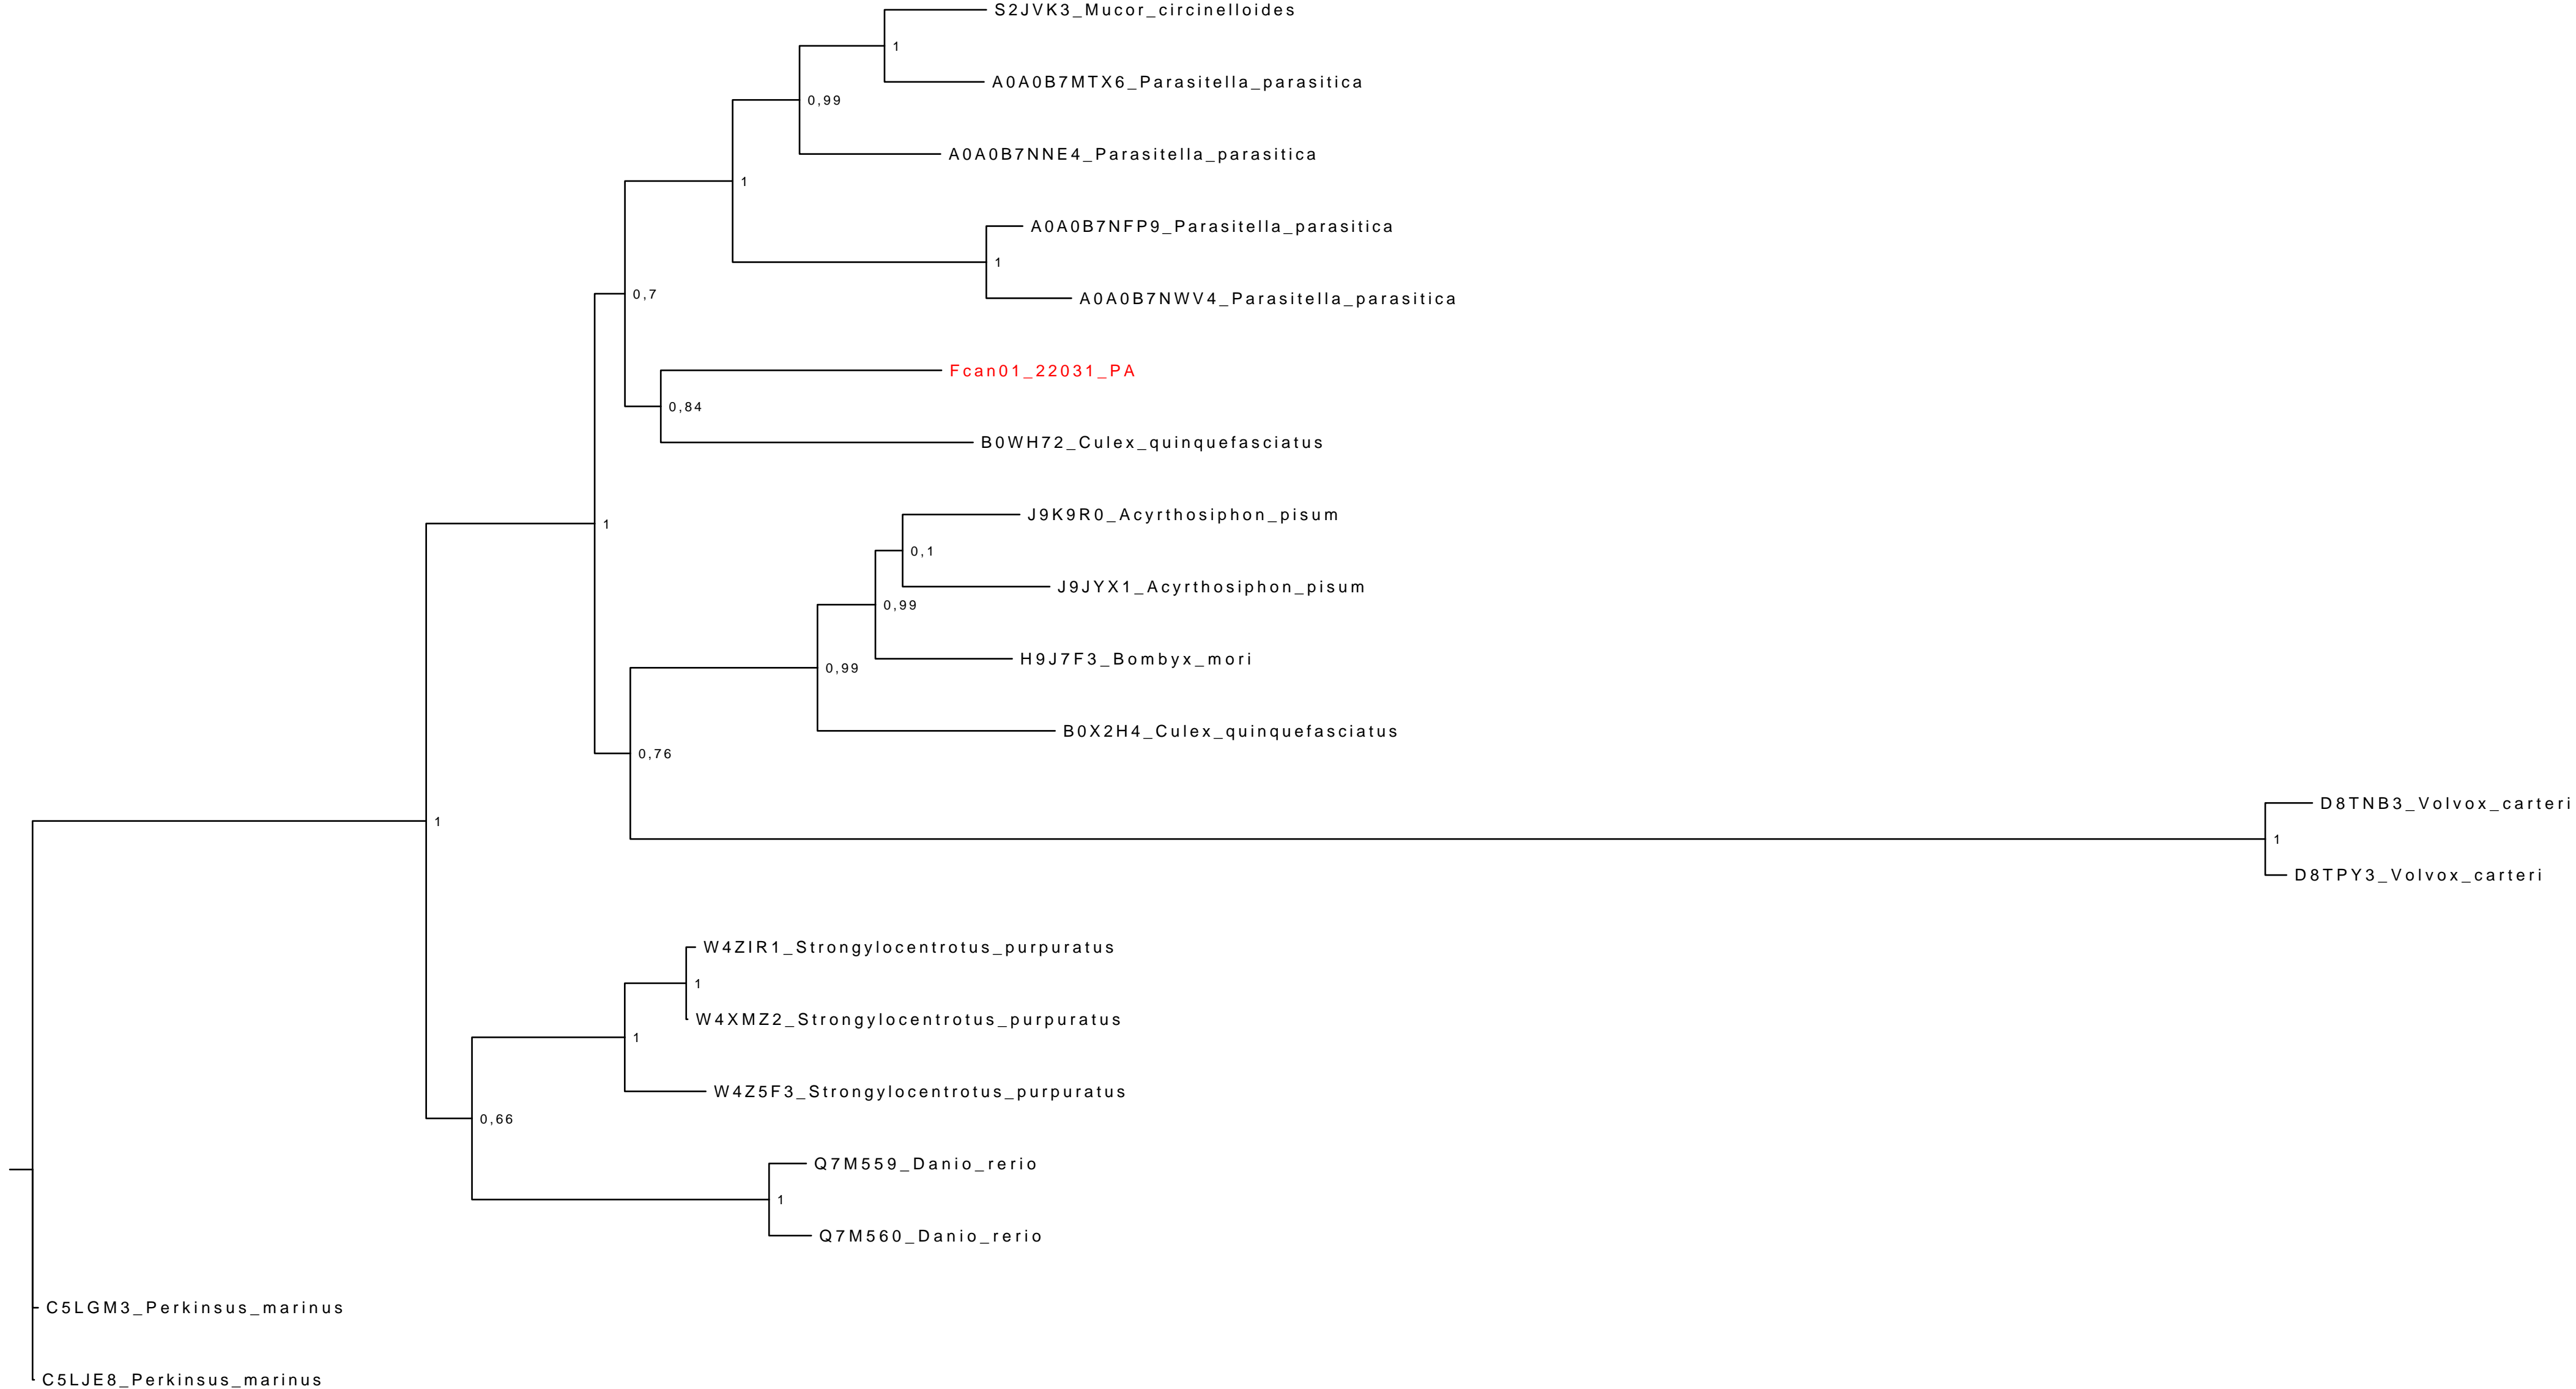

0.9

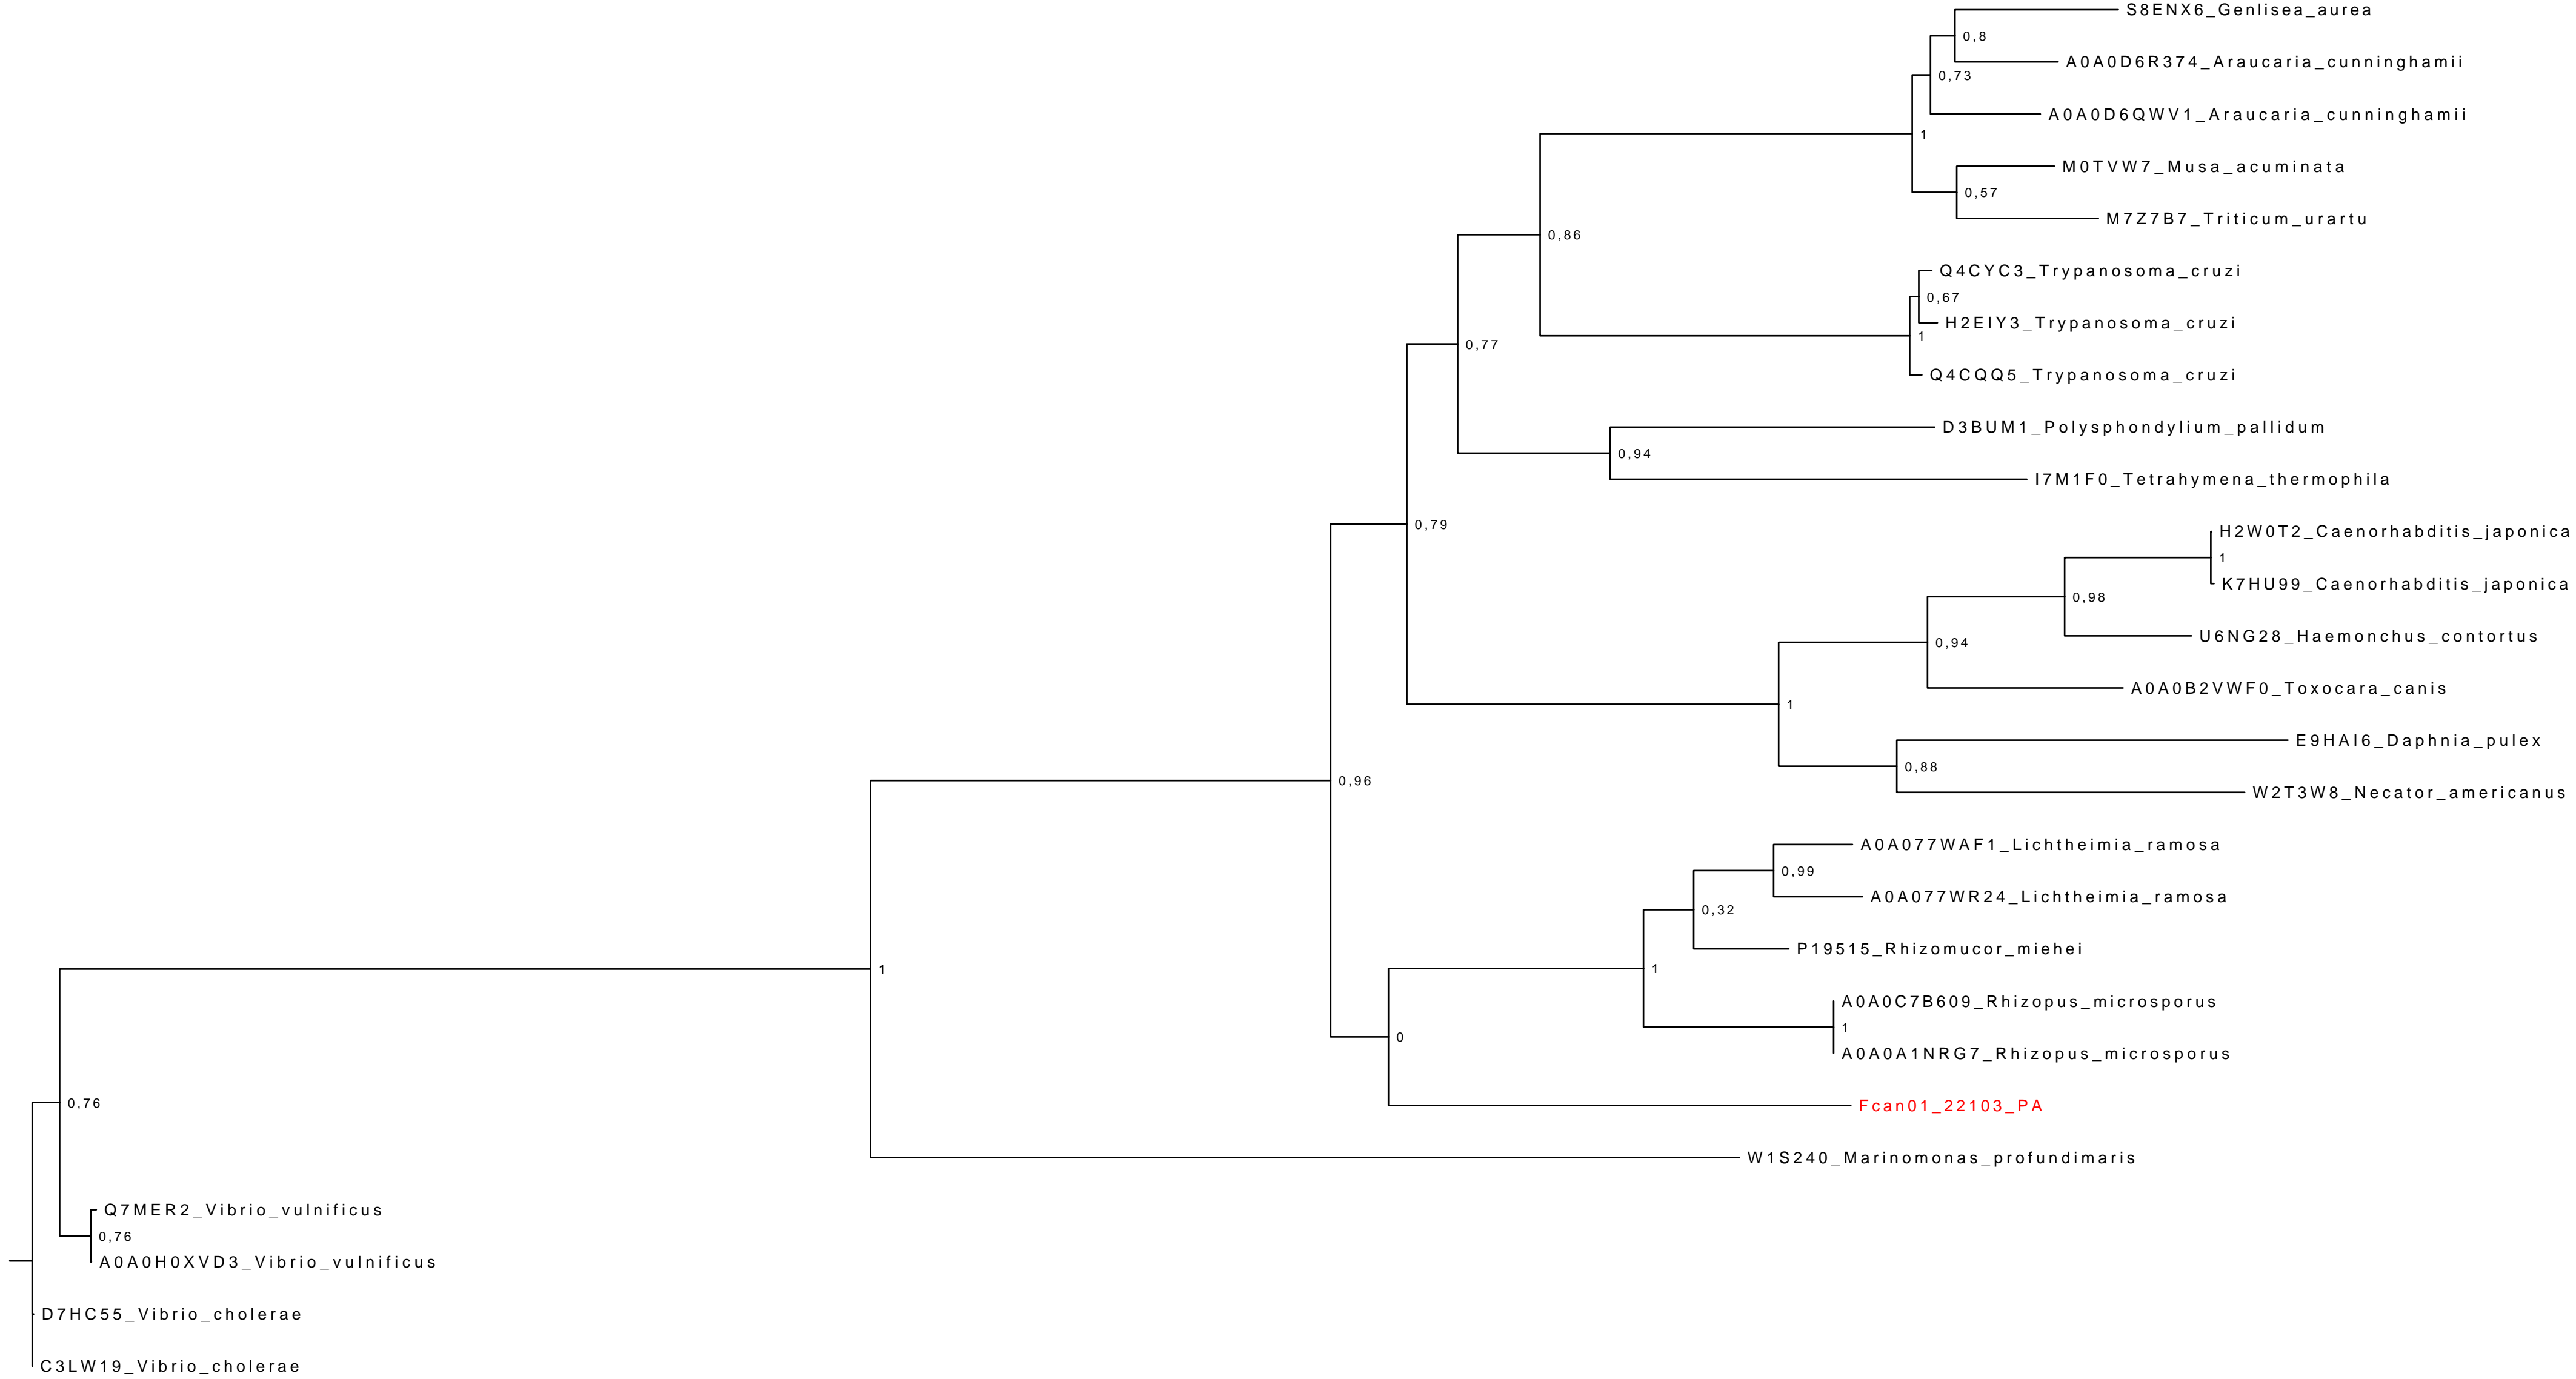

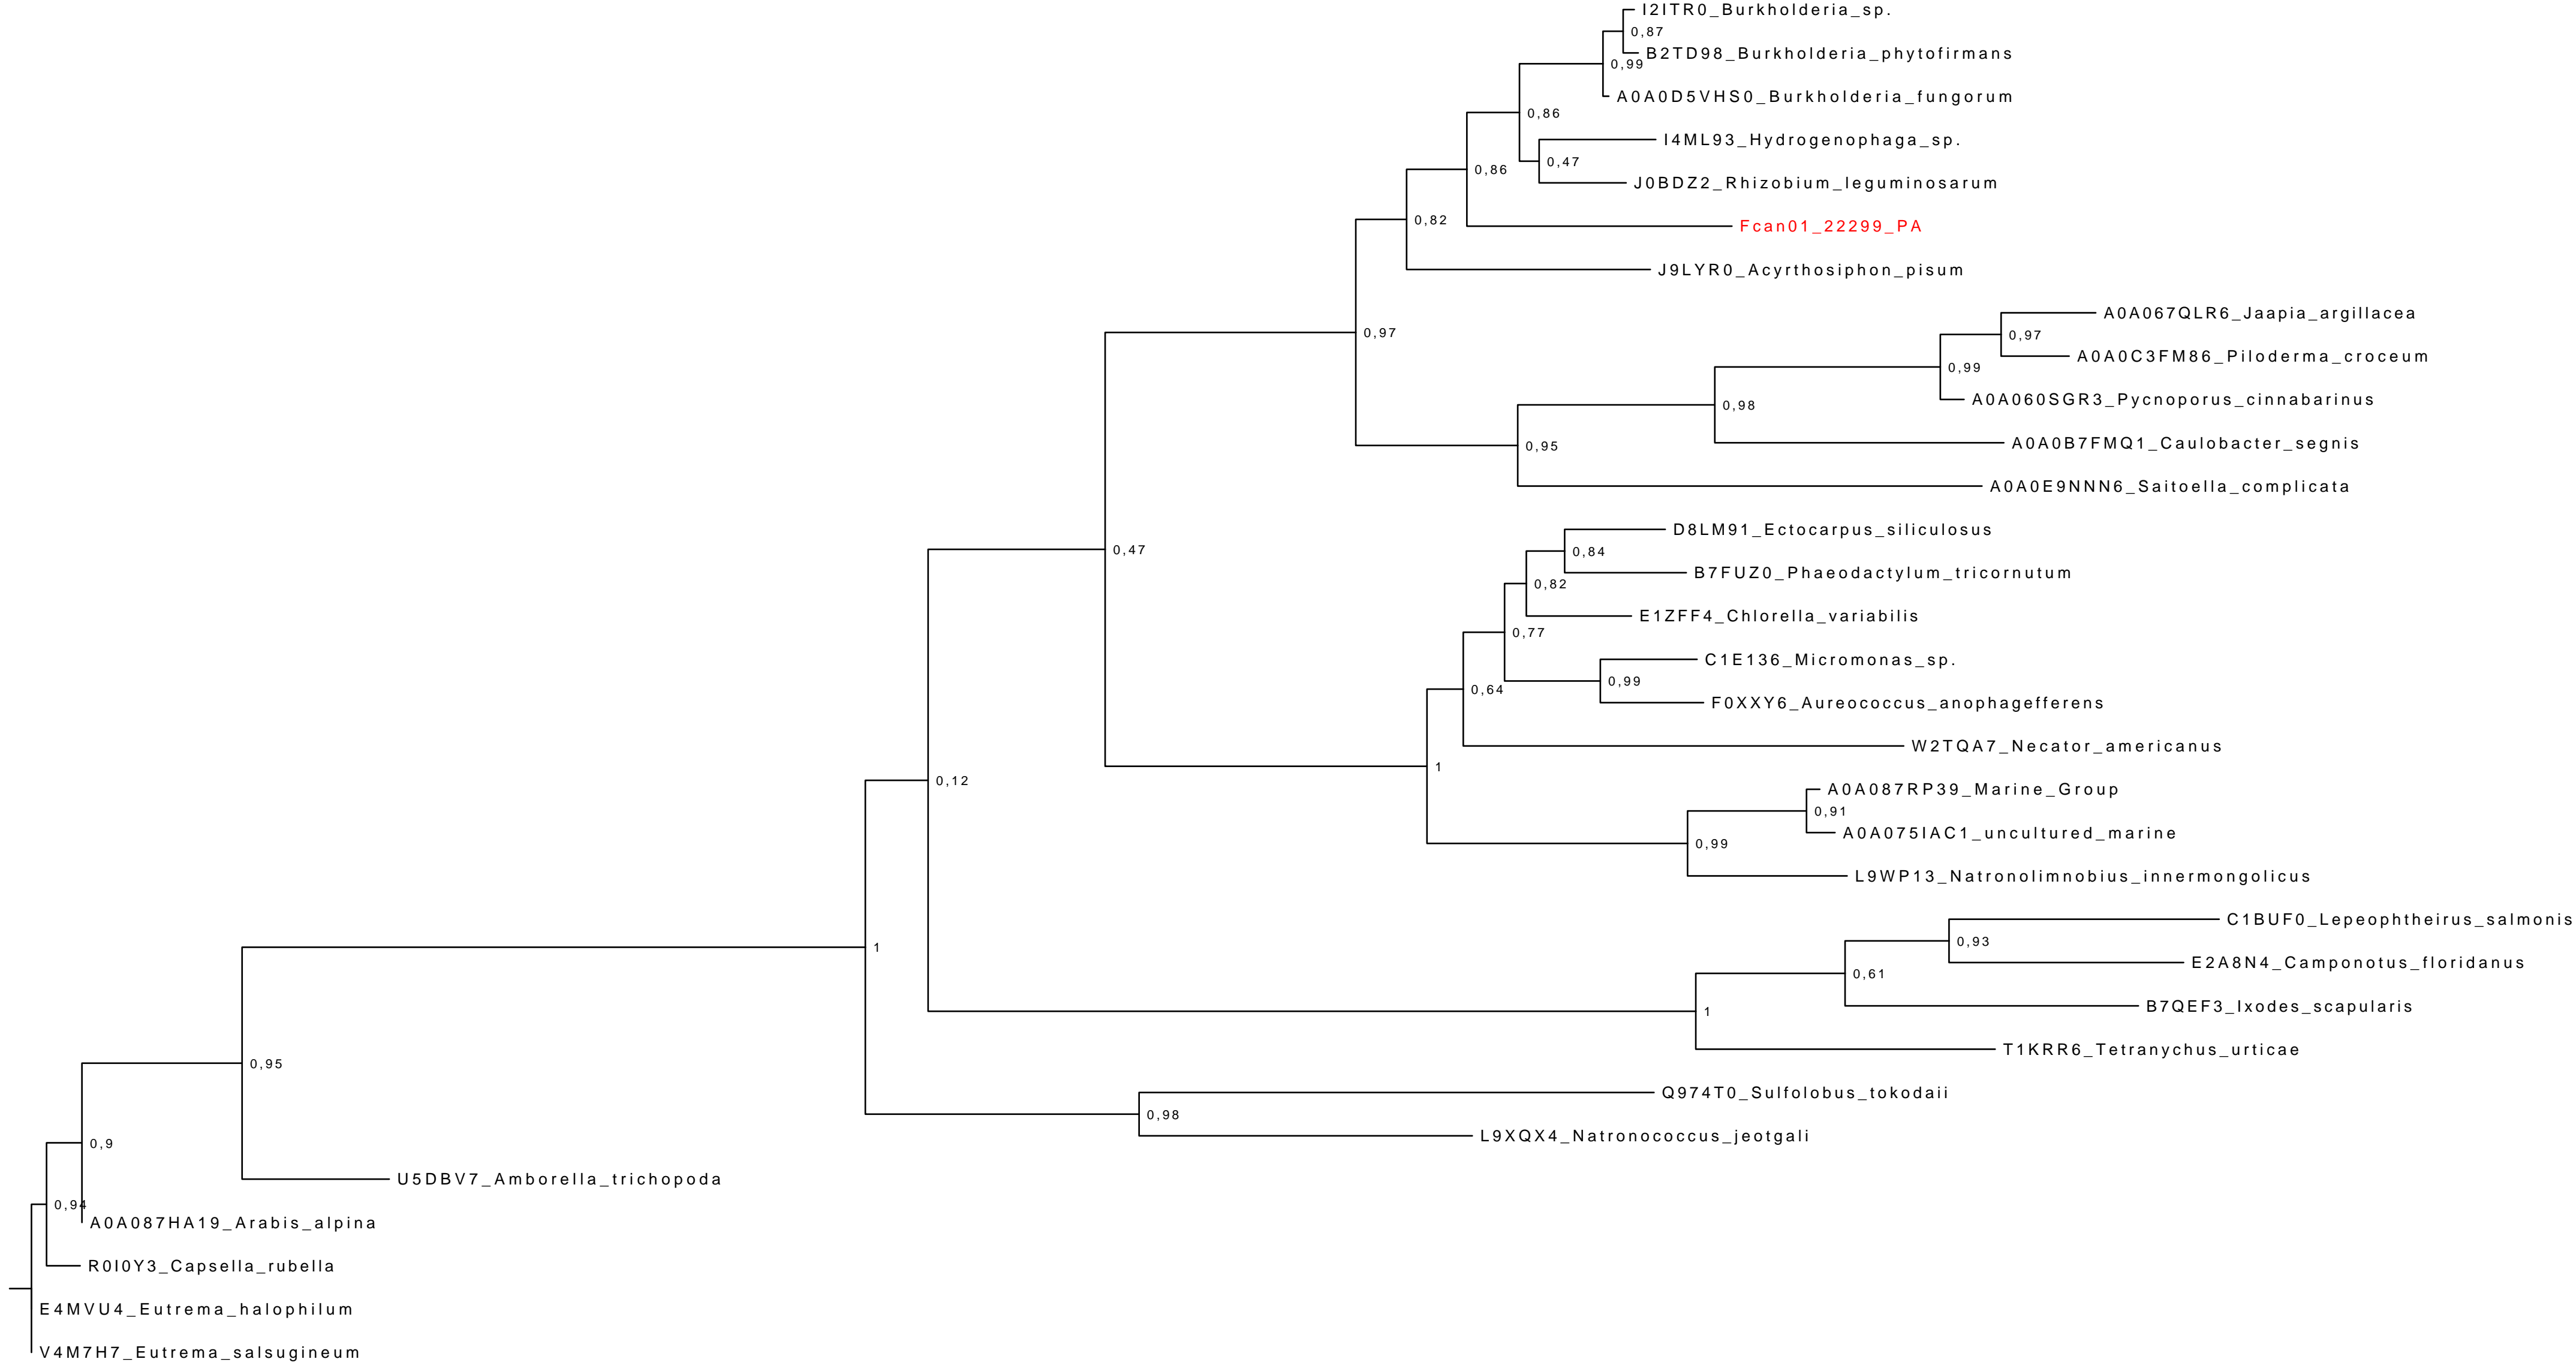

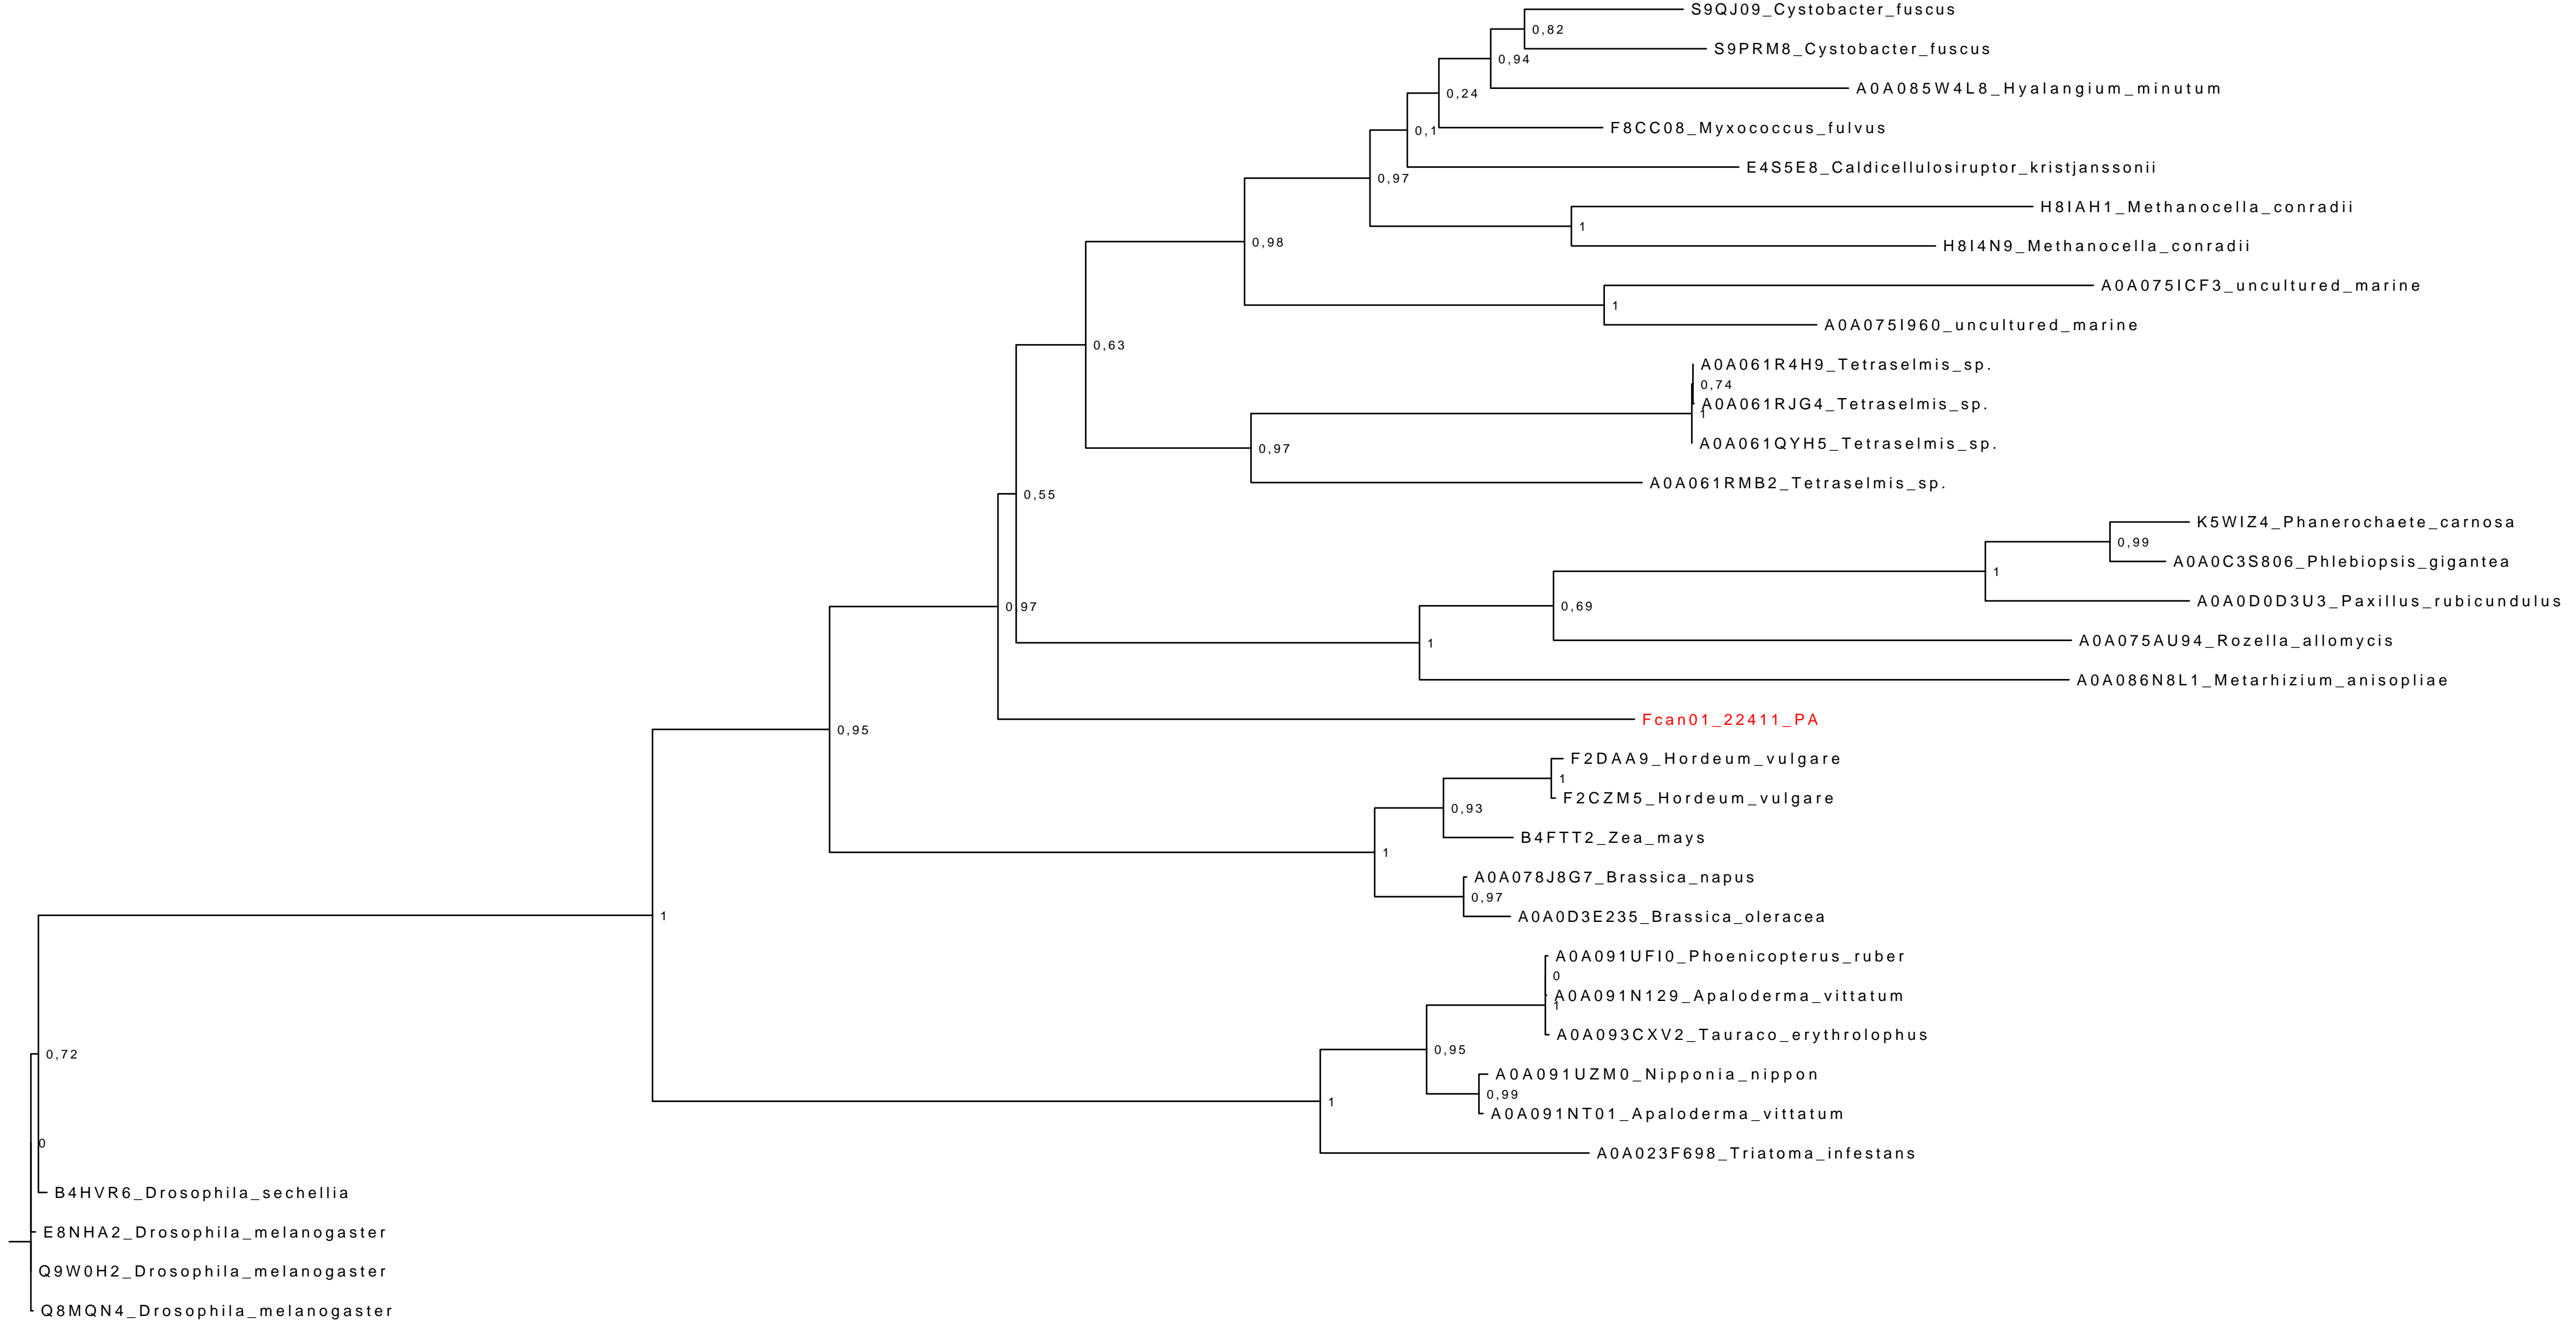

0.4

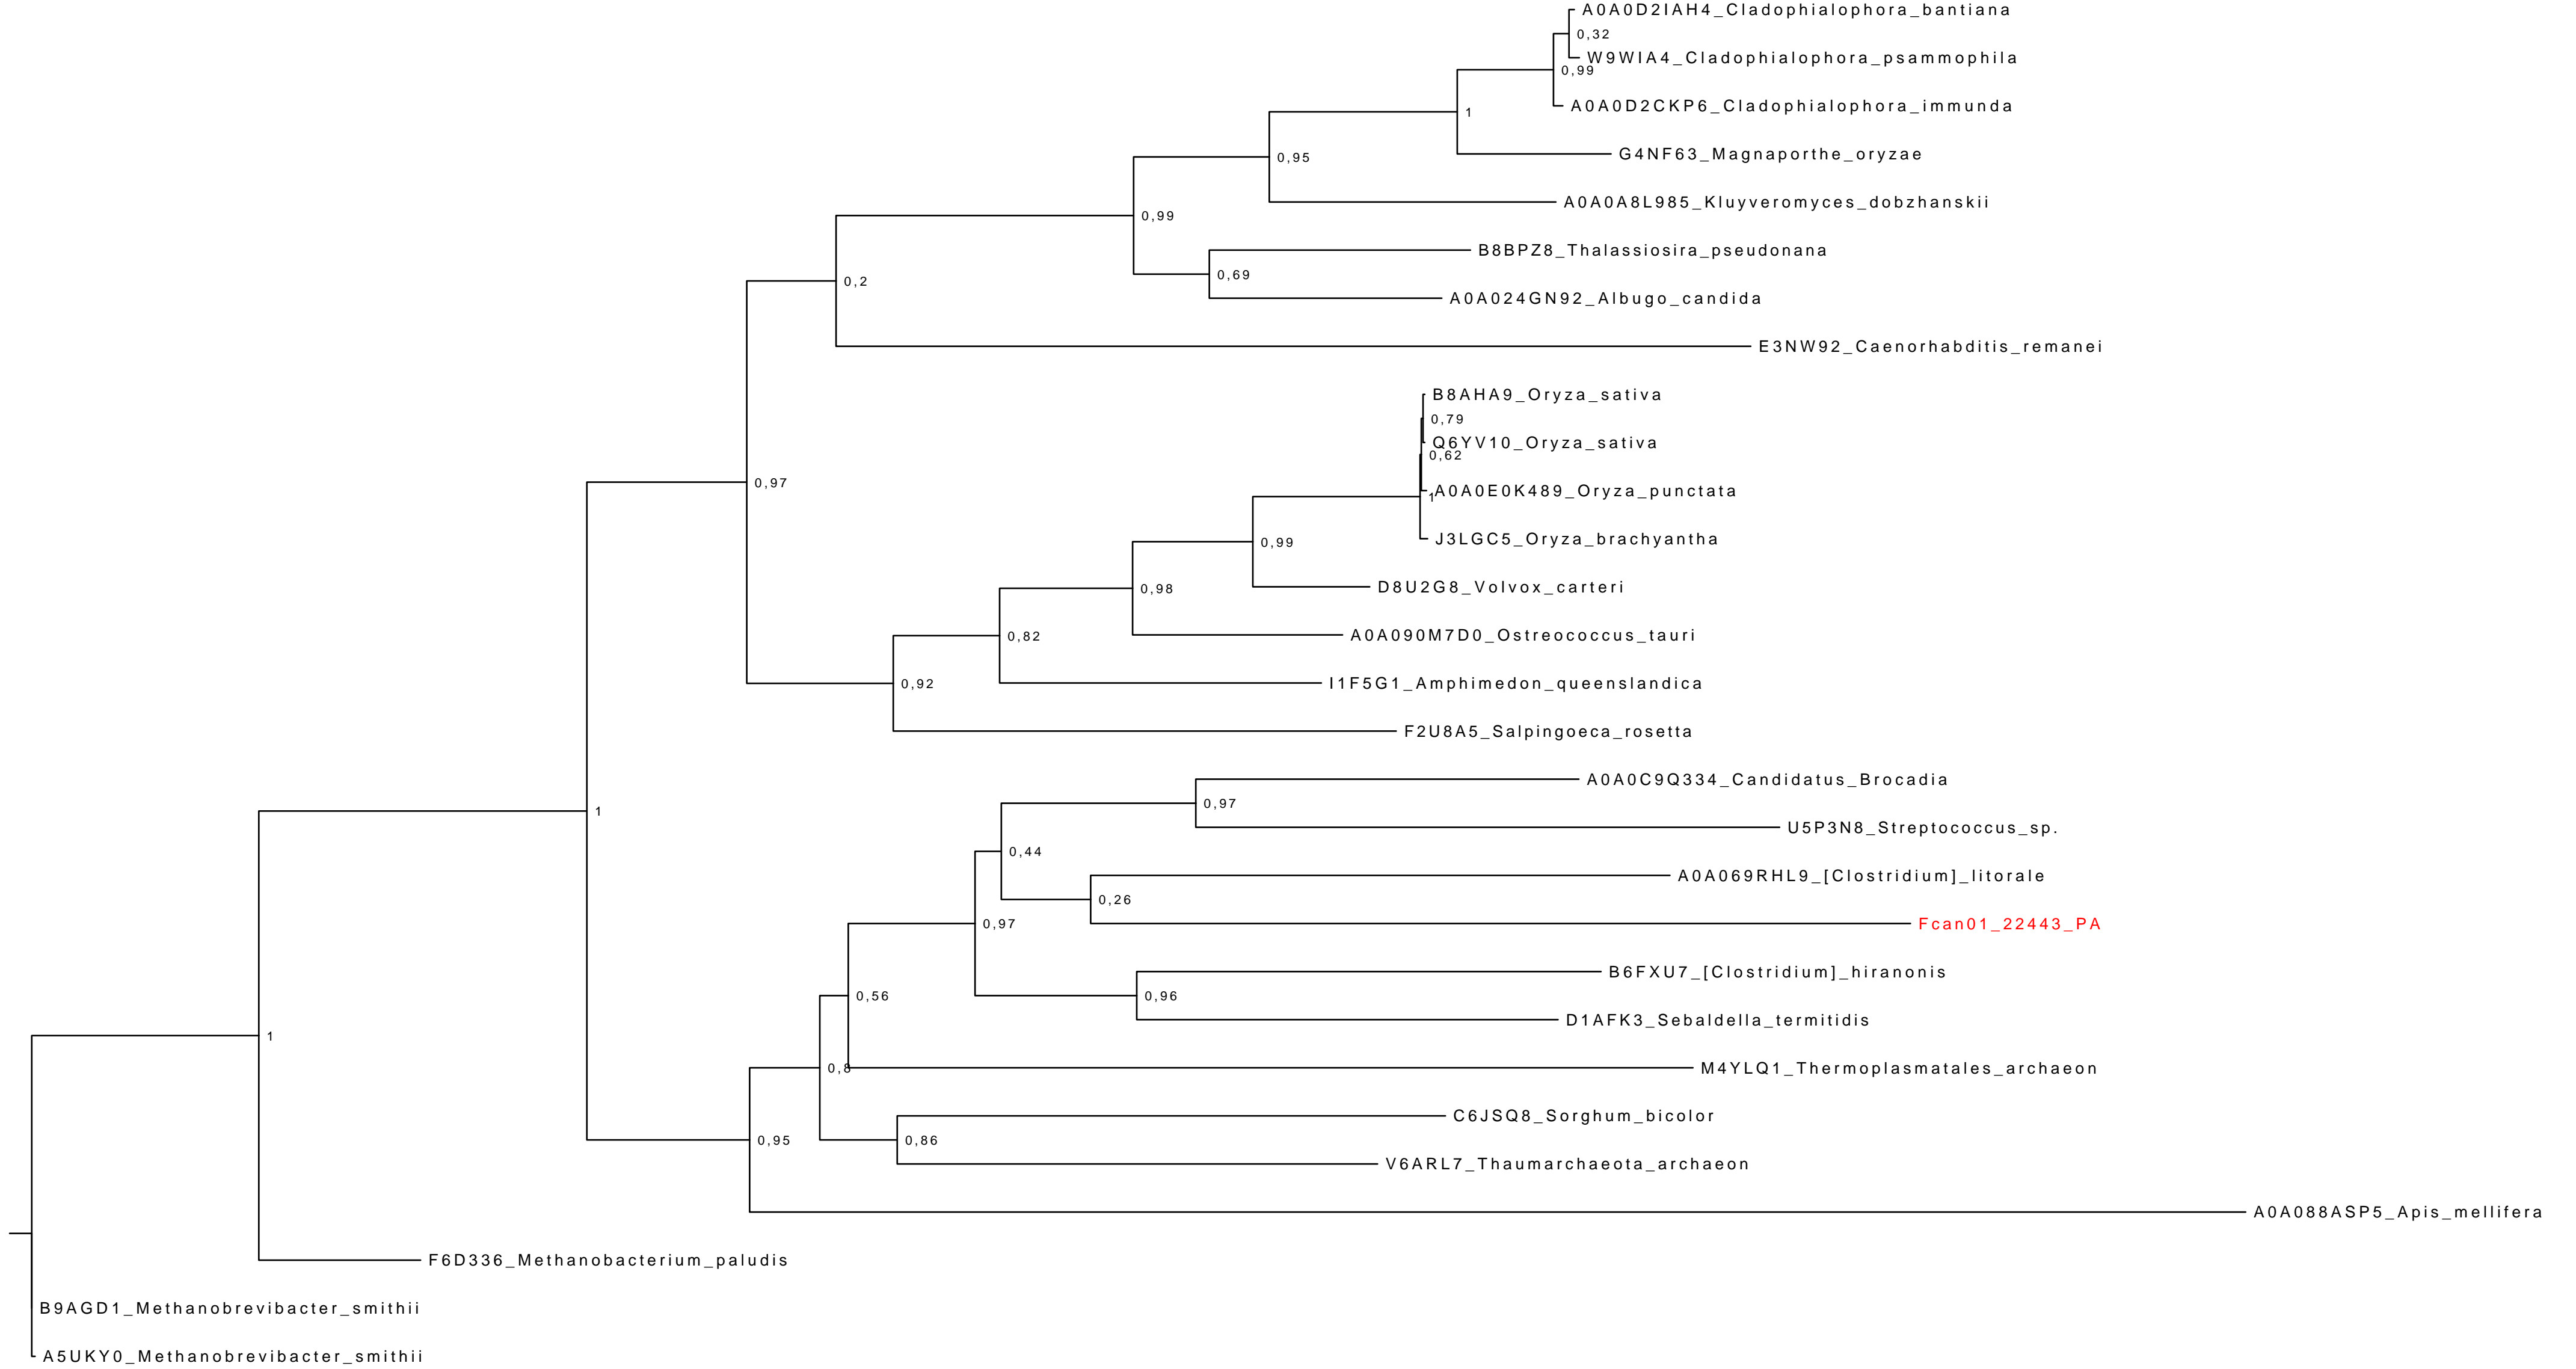

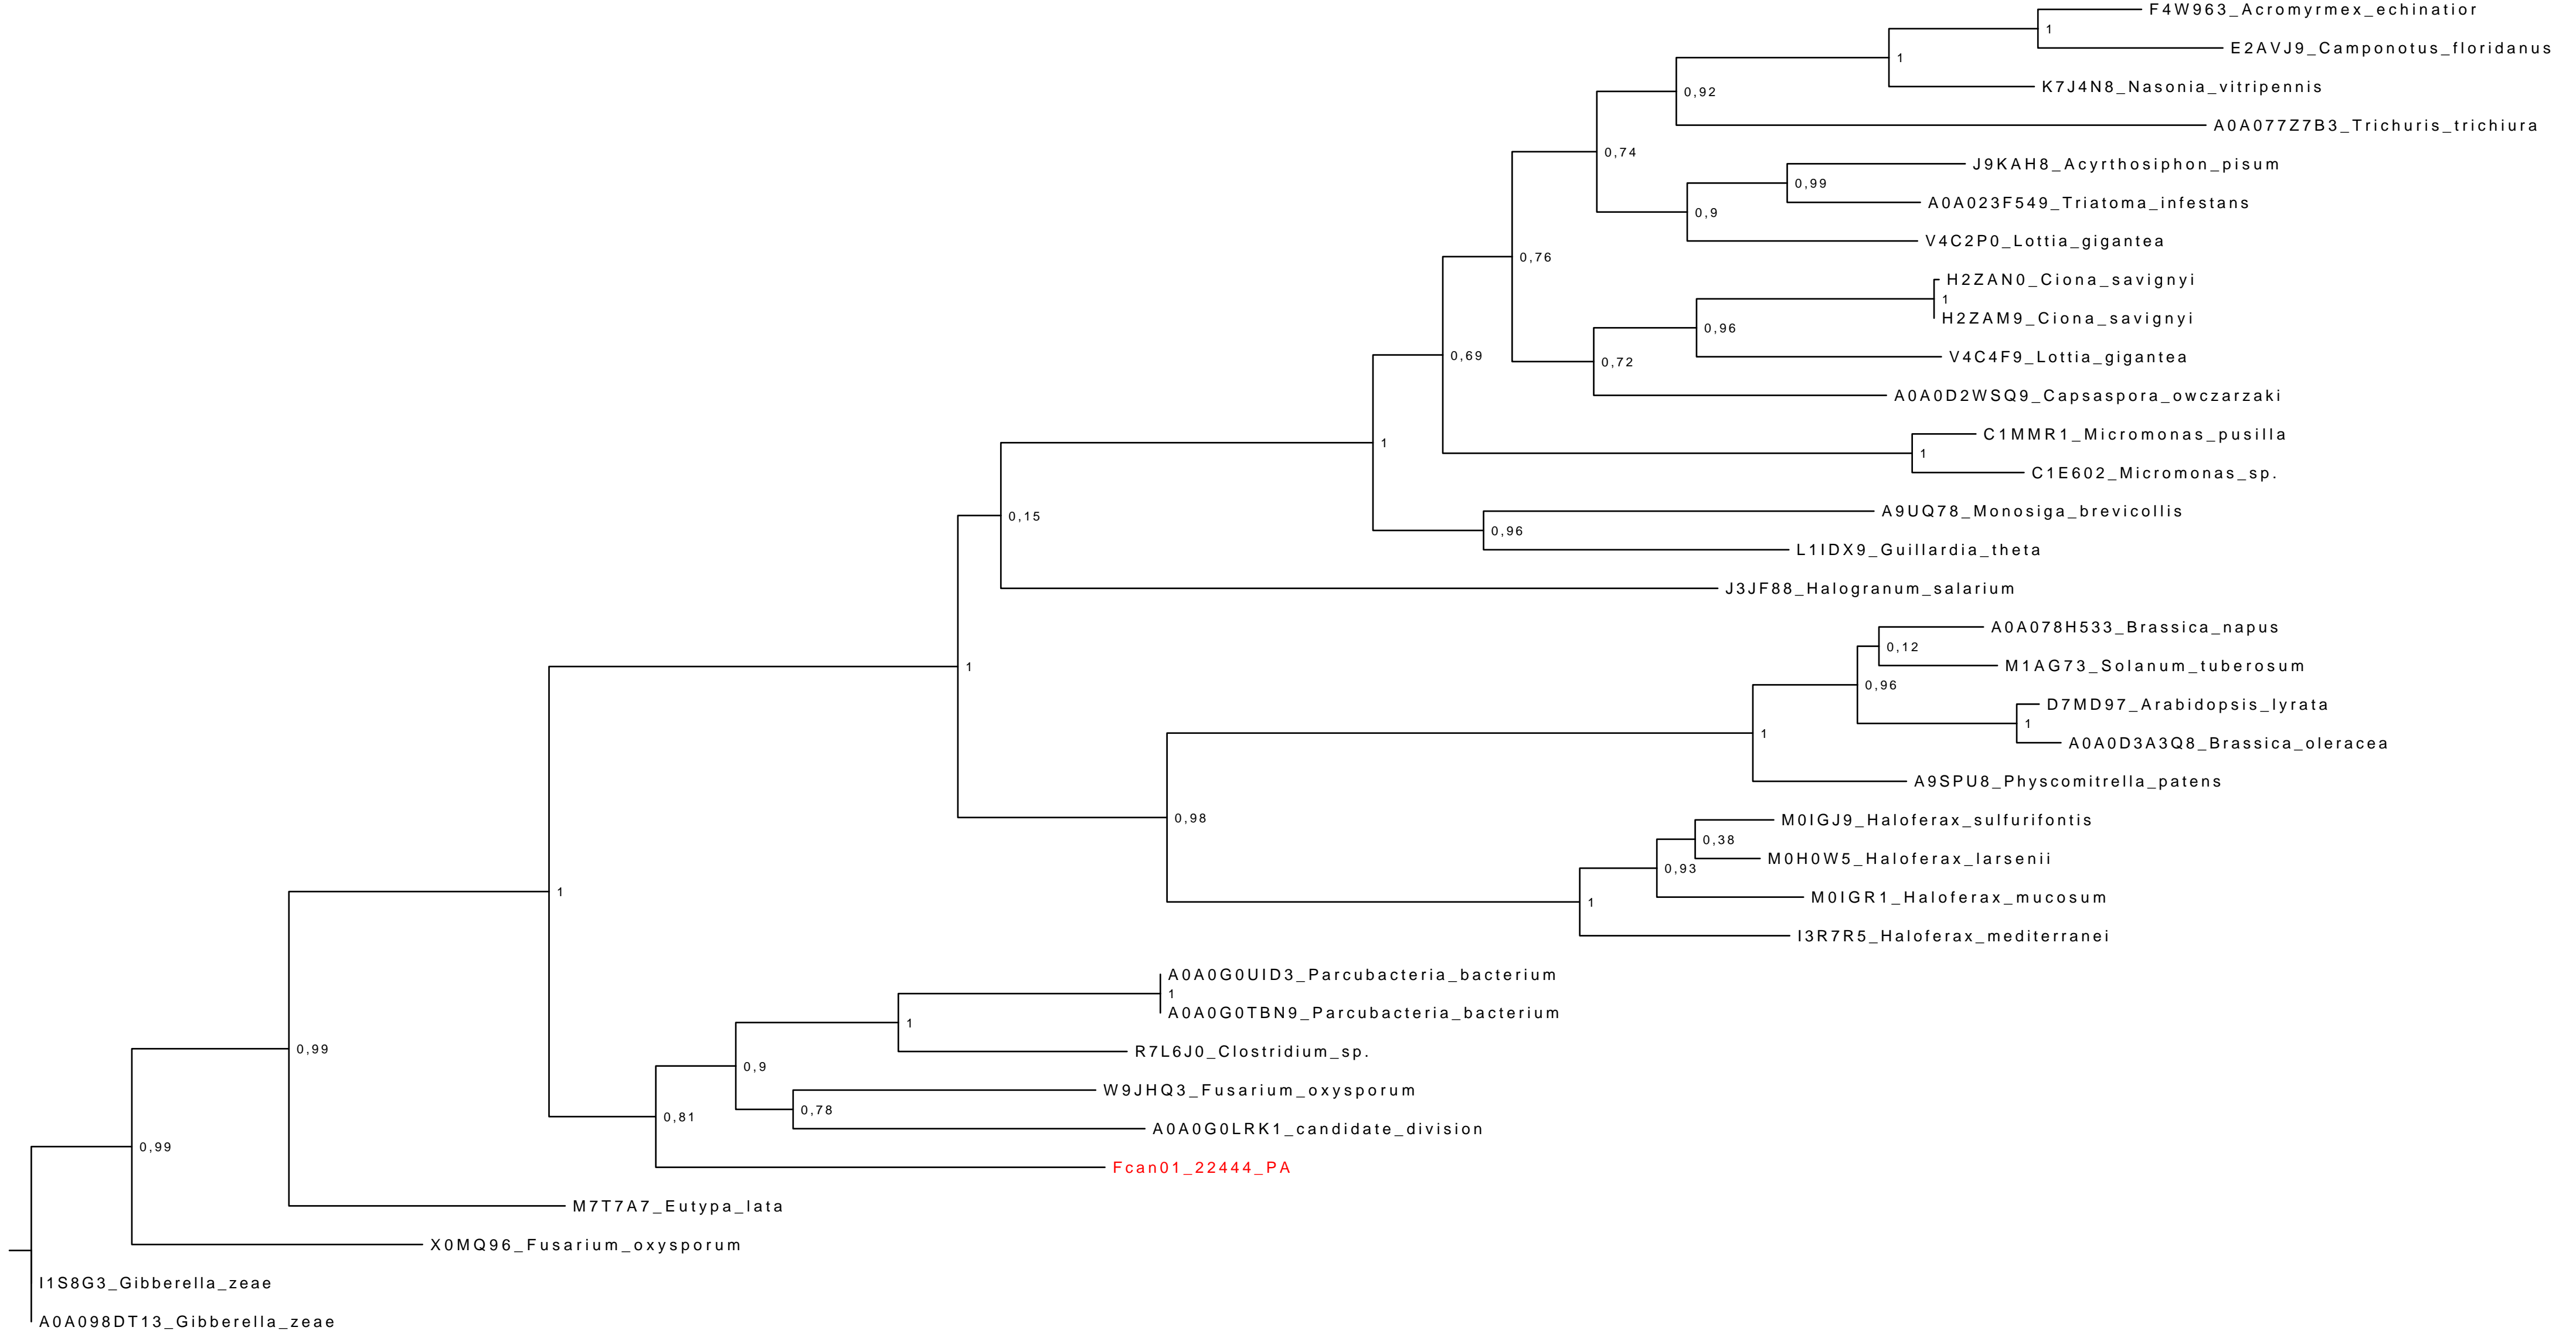



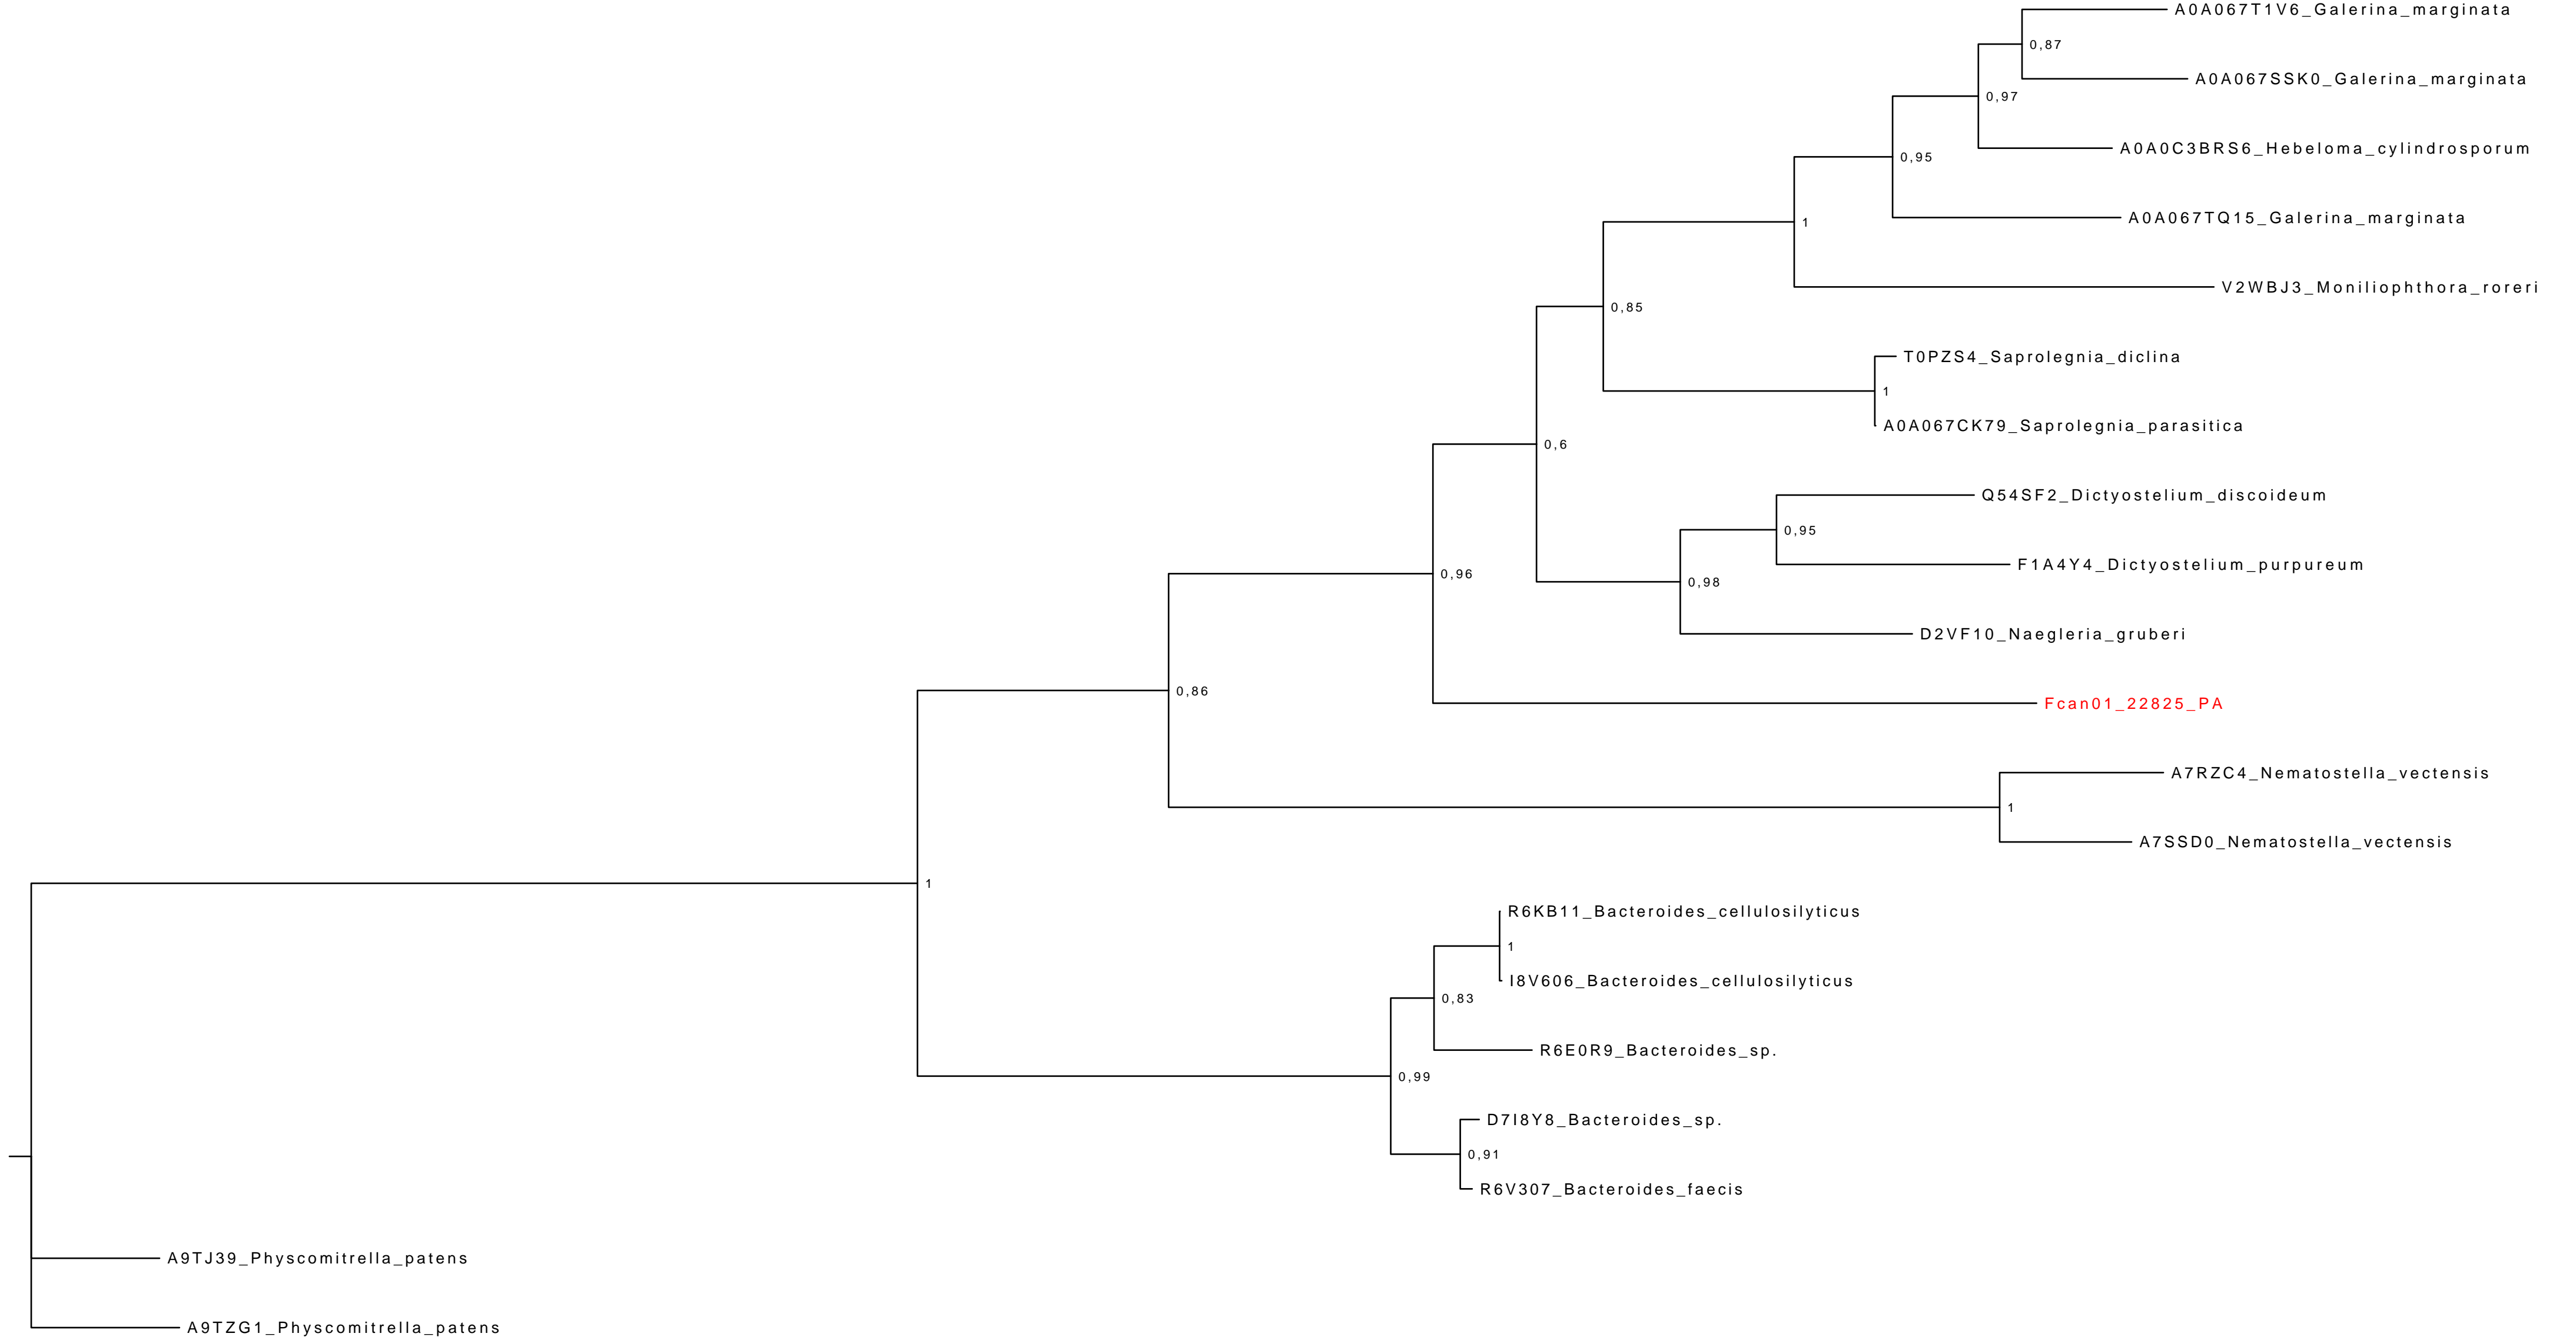

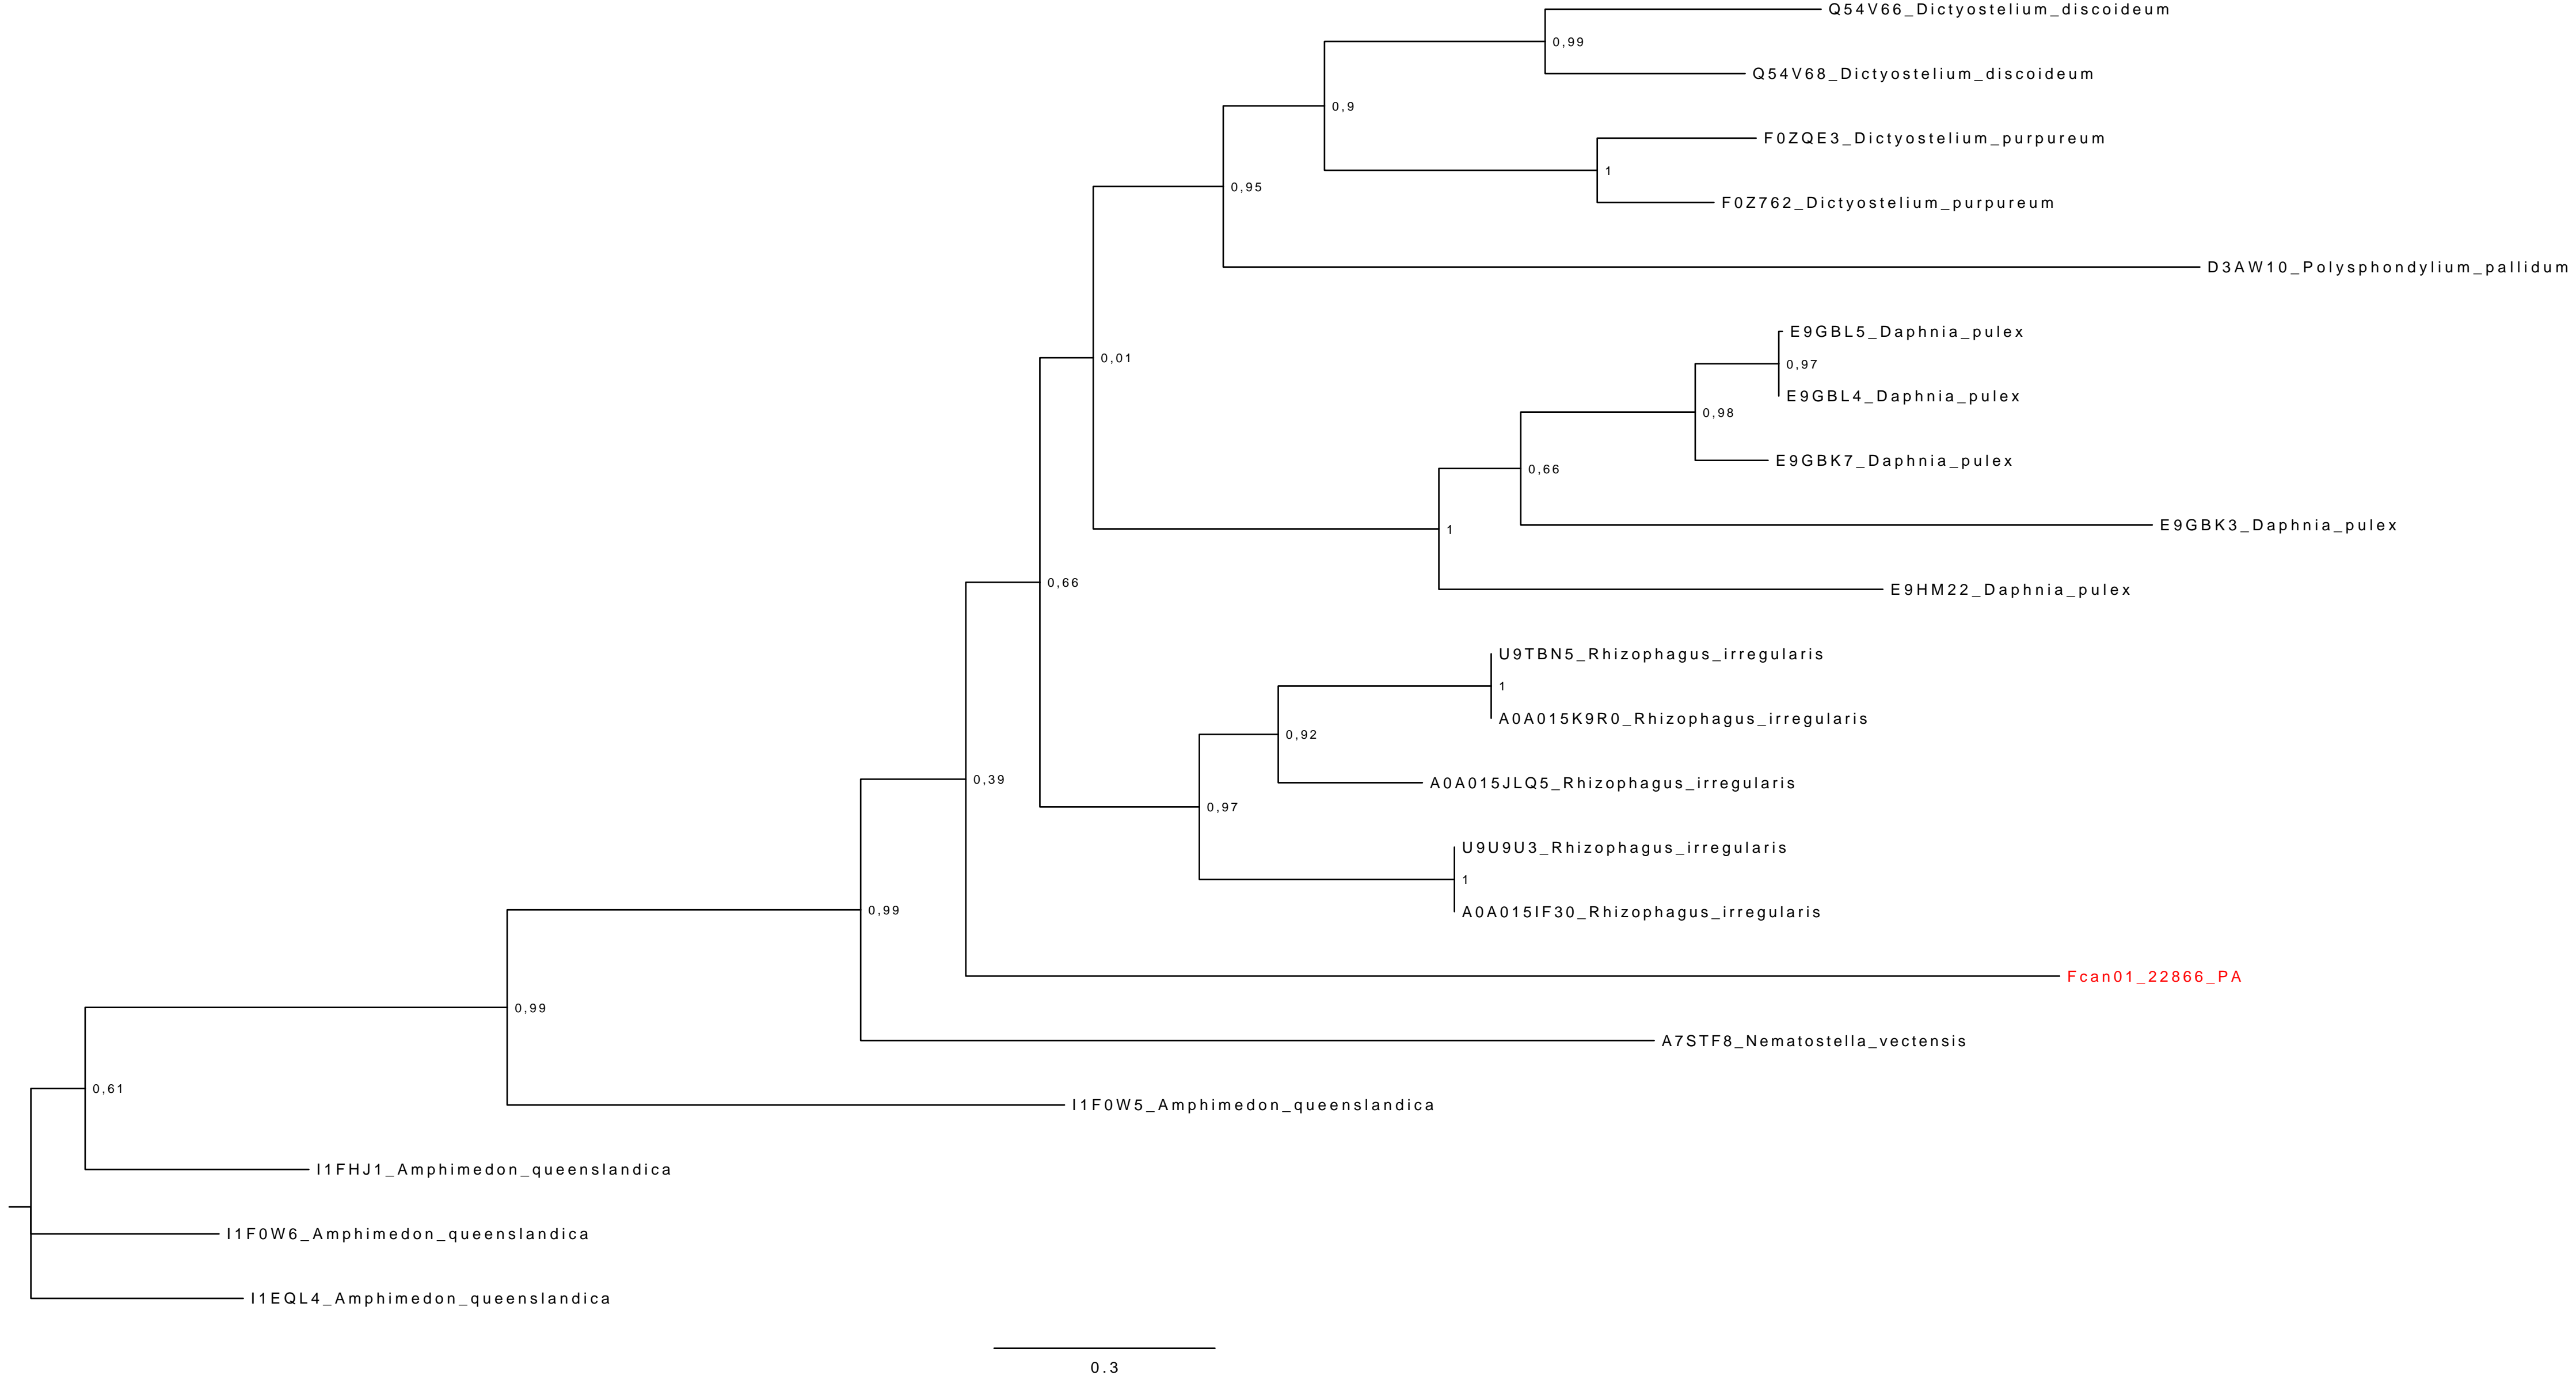

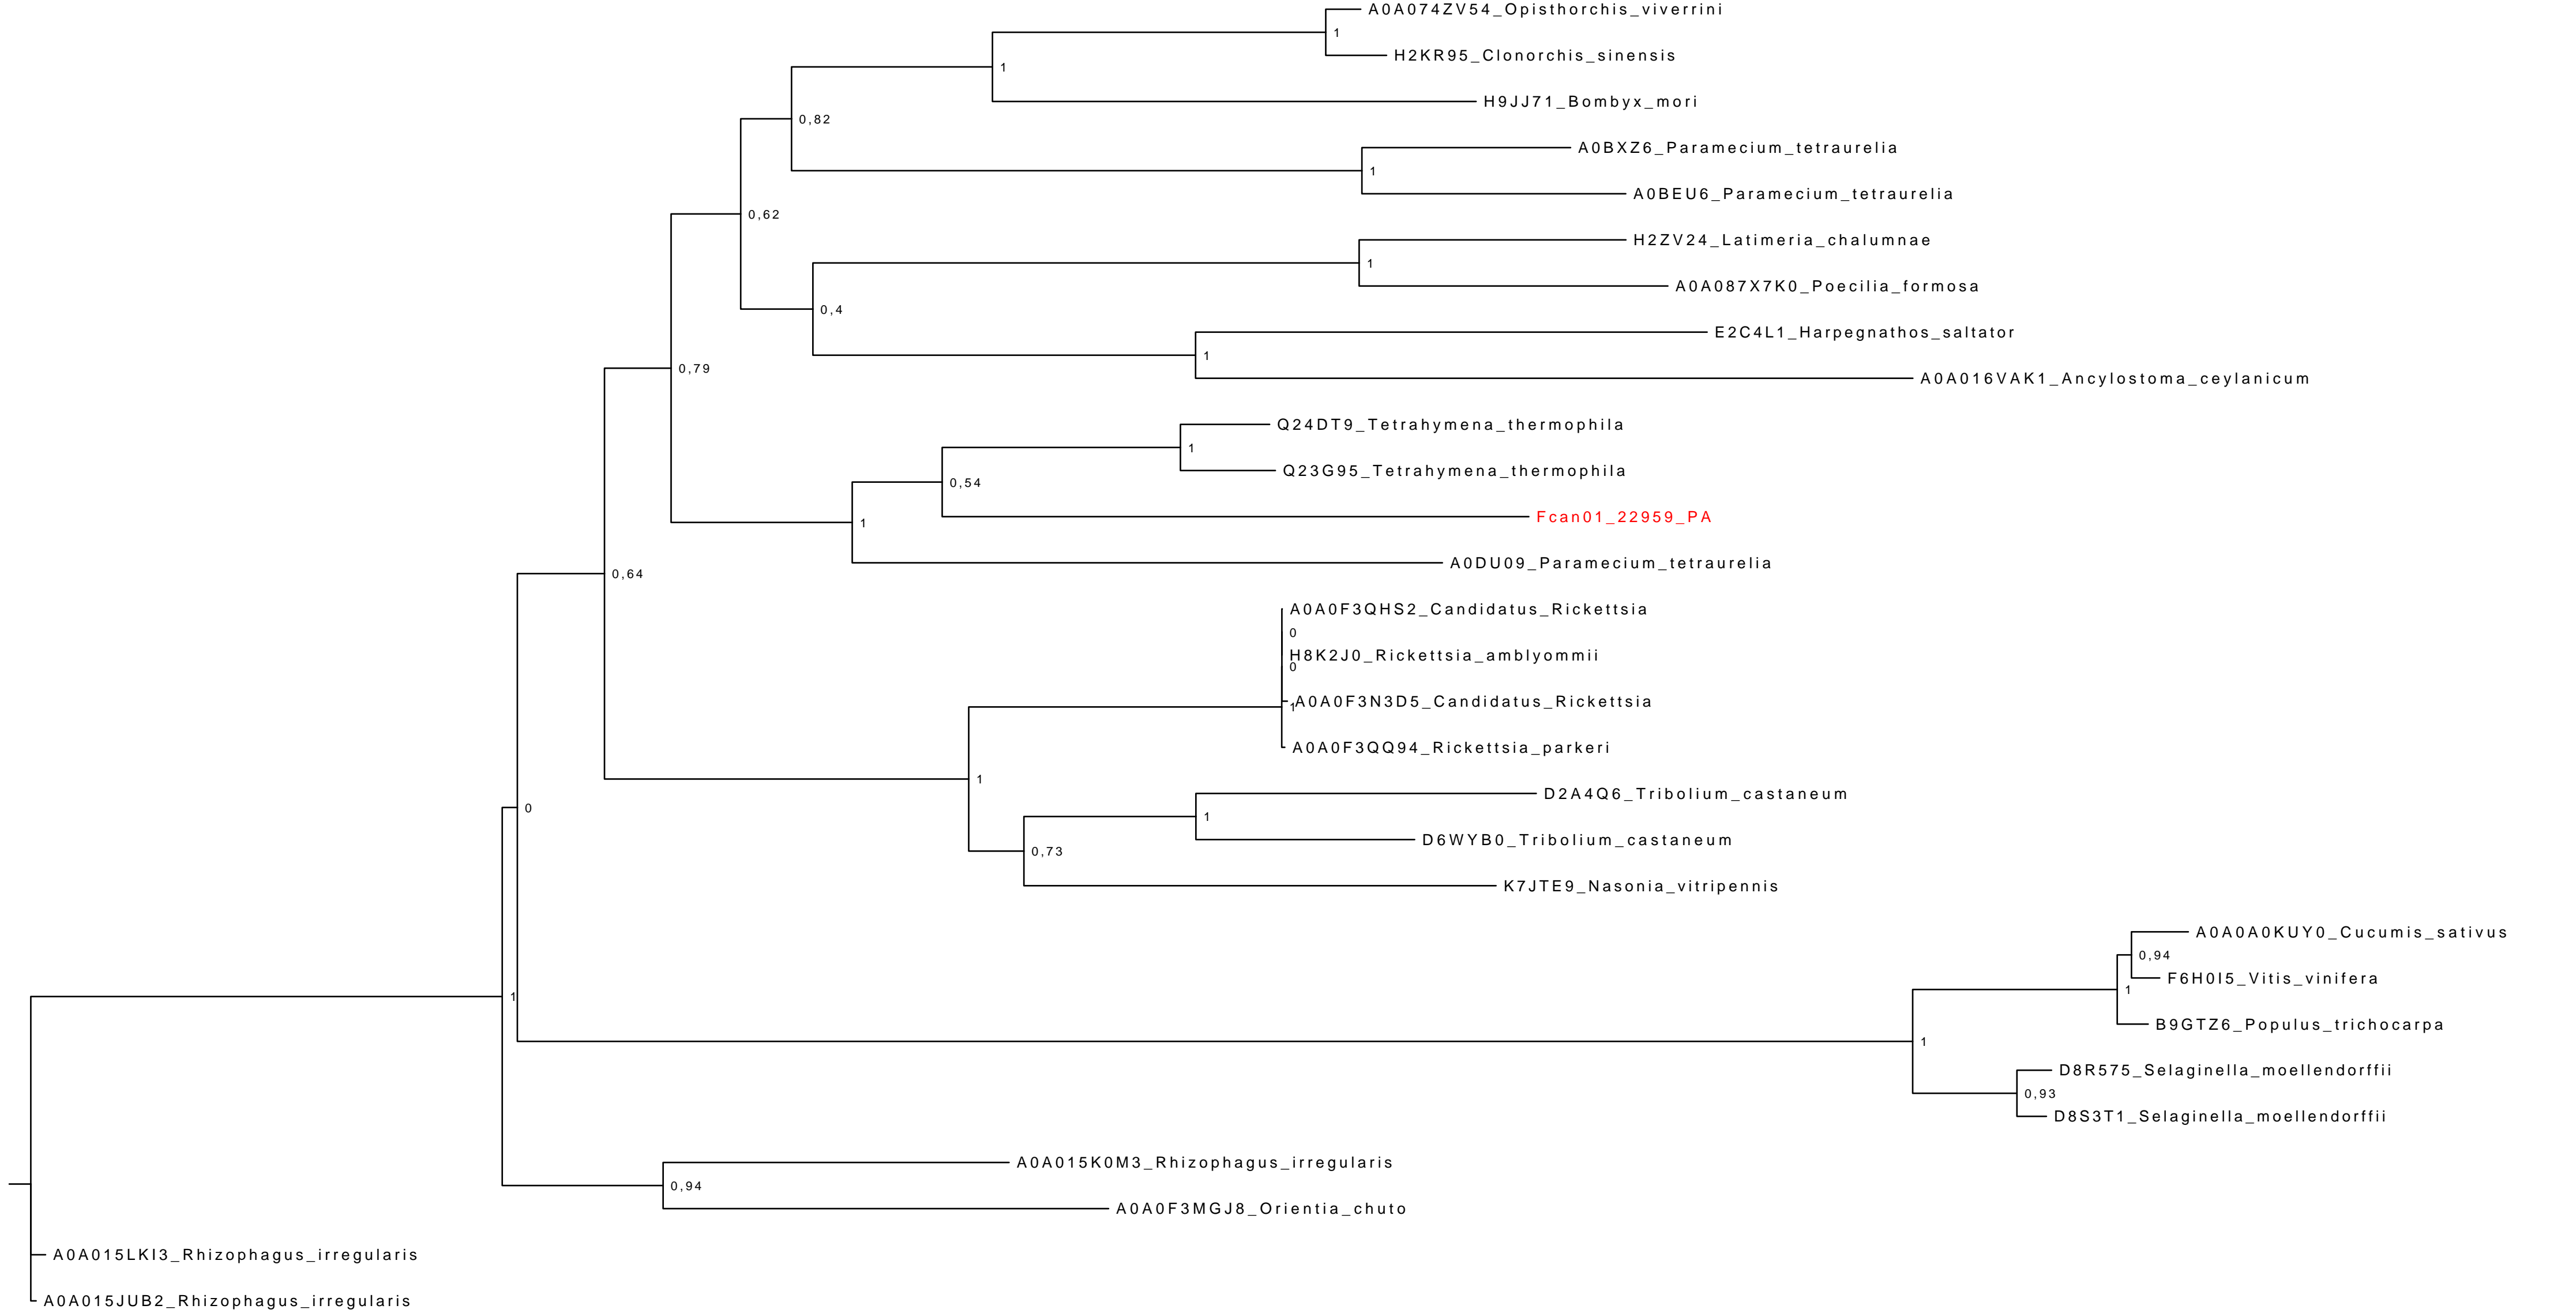

0.5

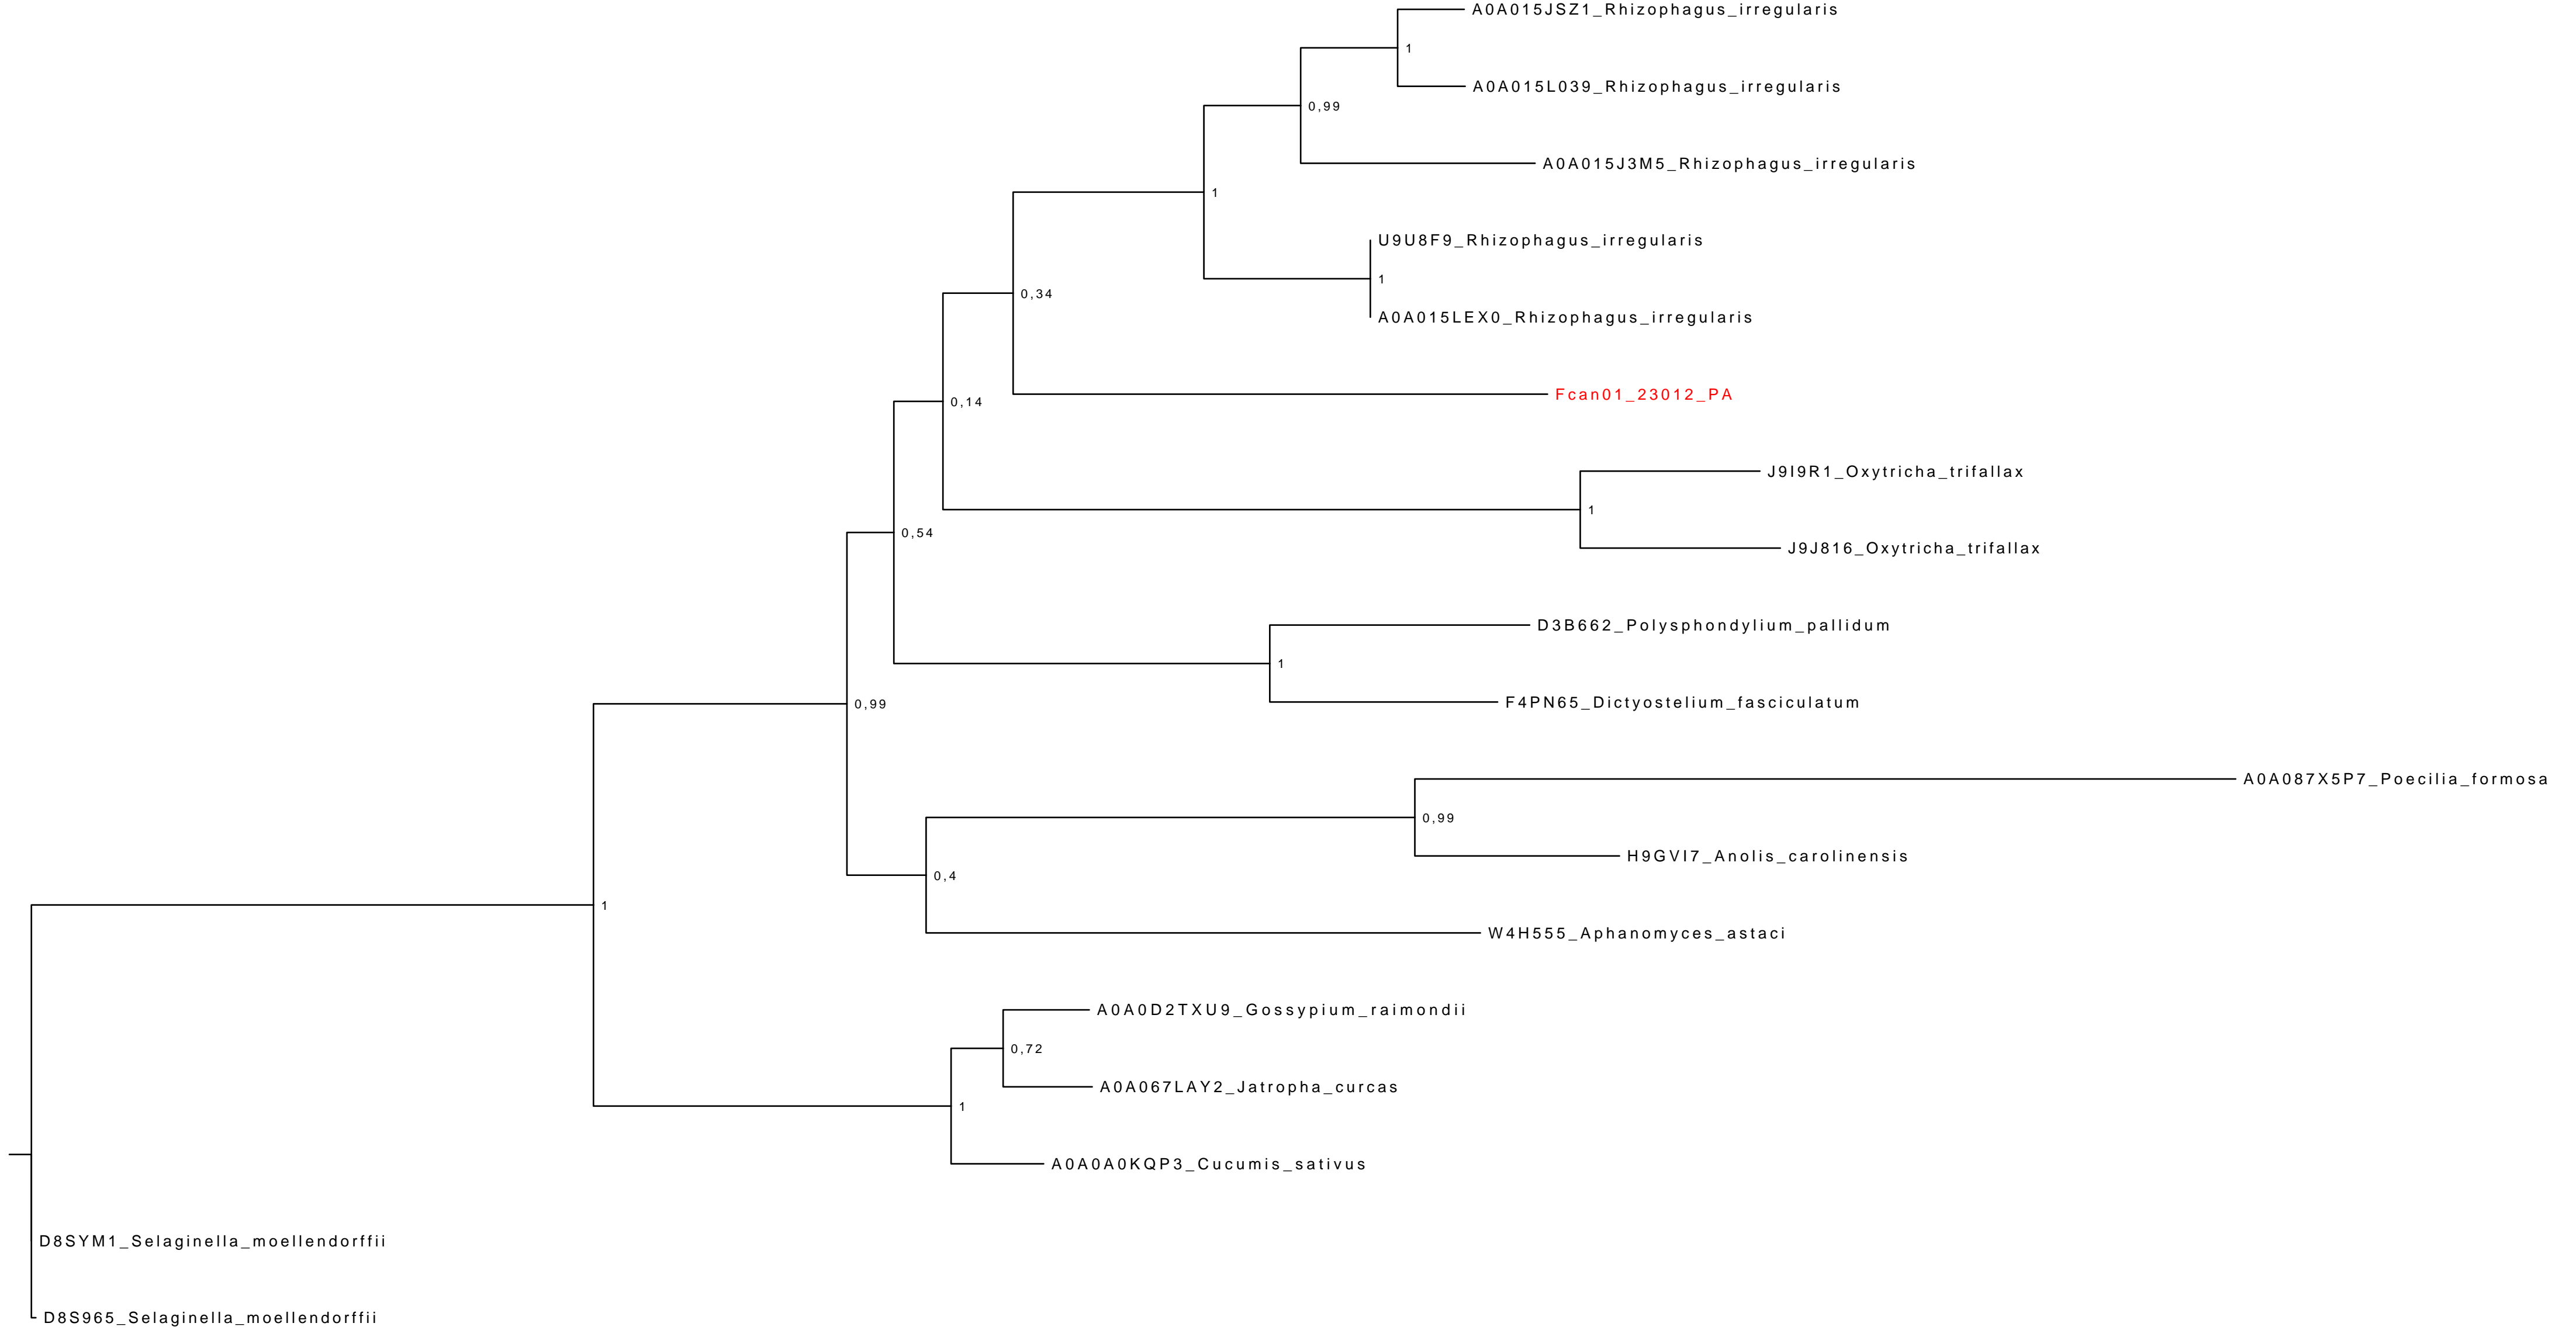

0.6

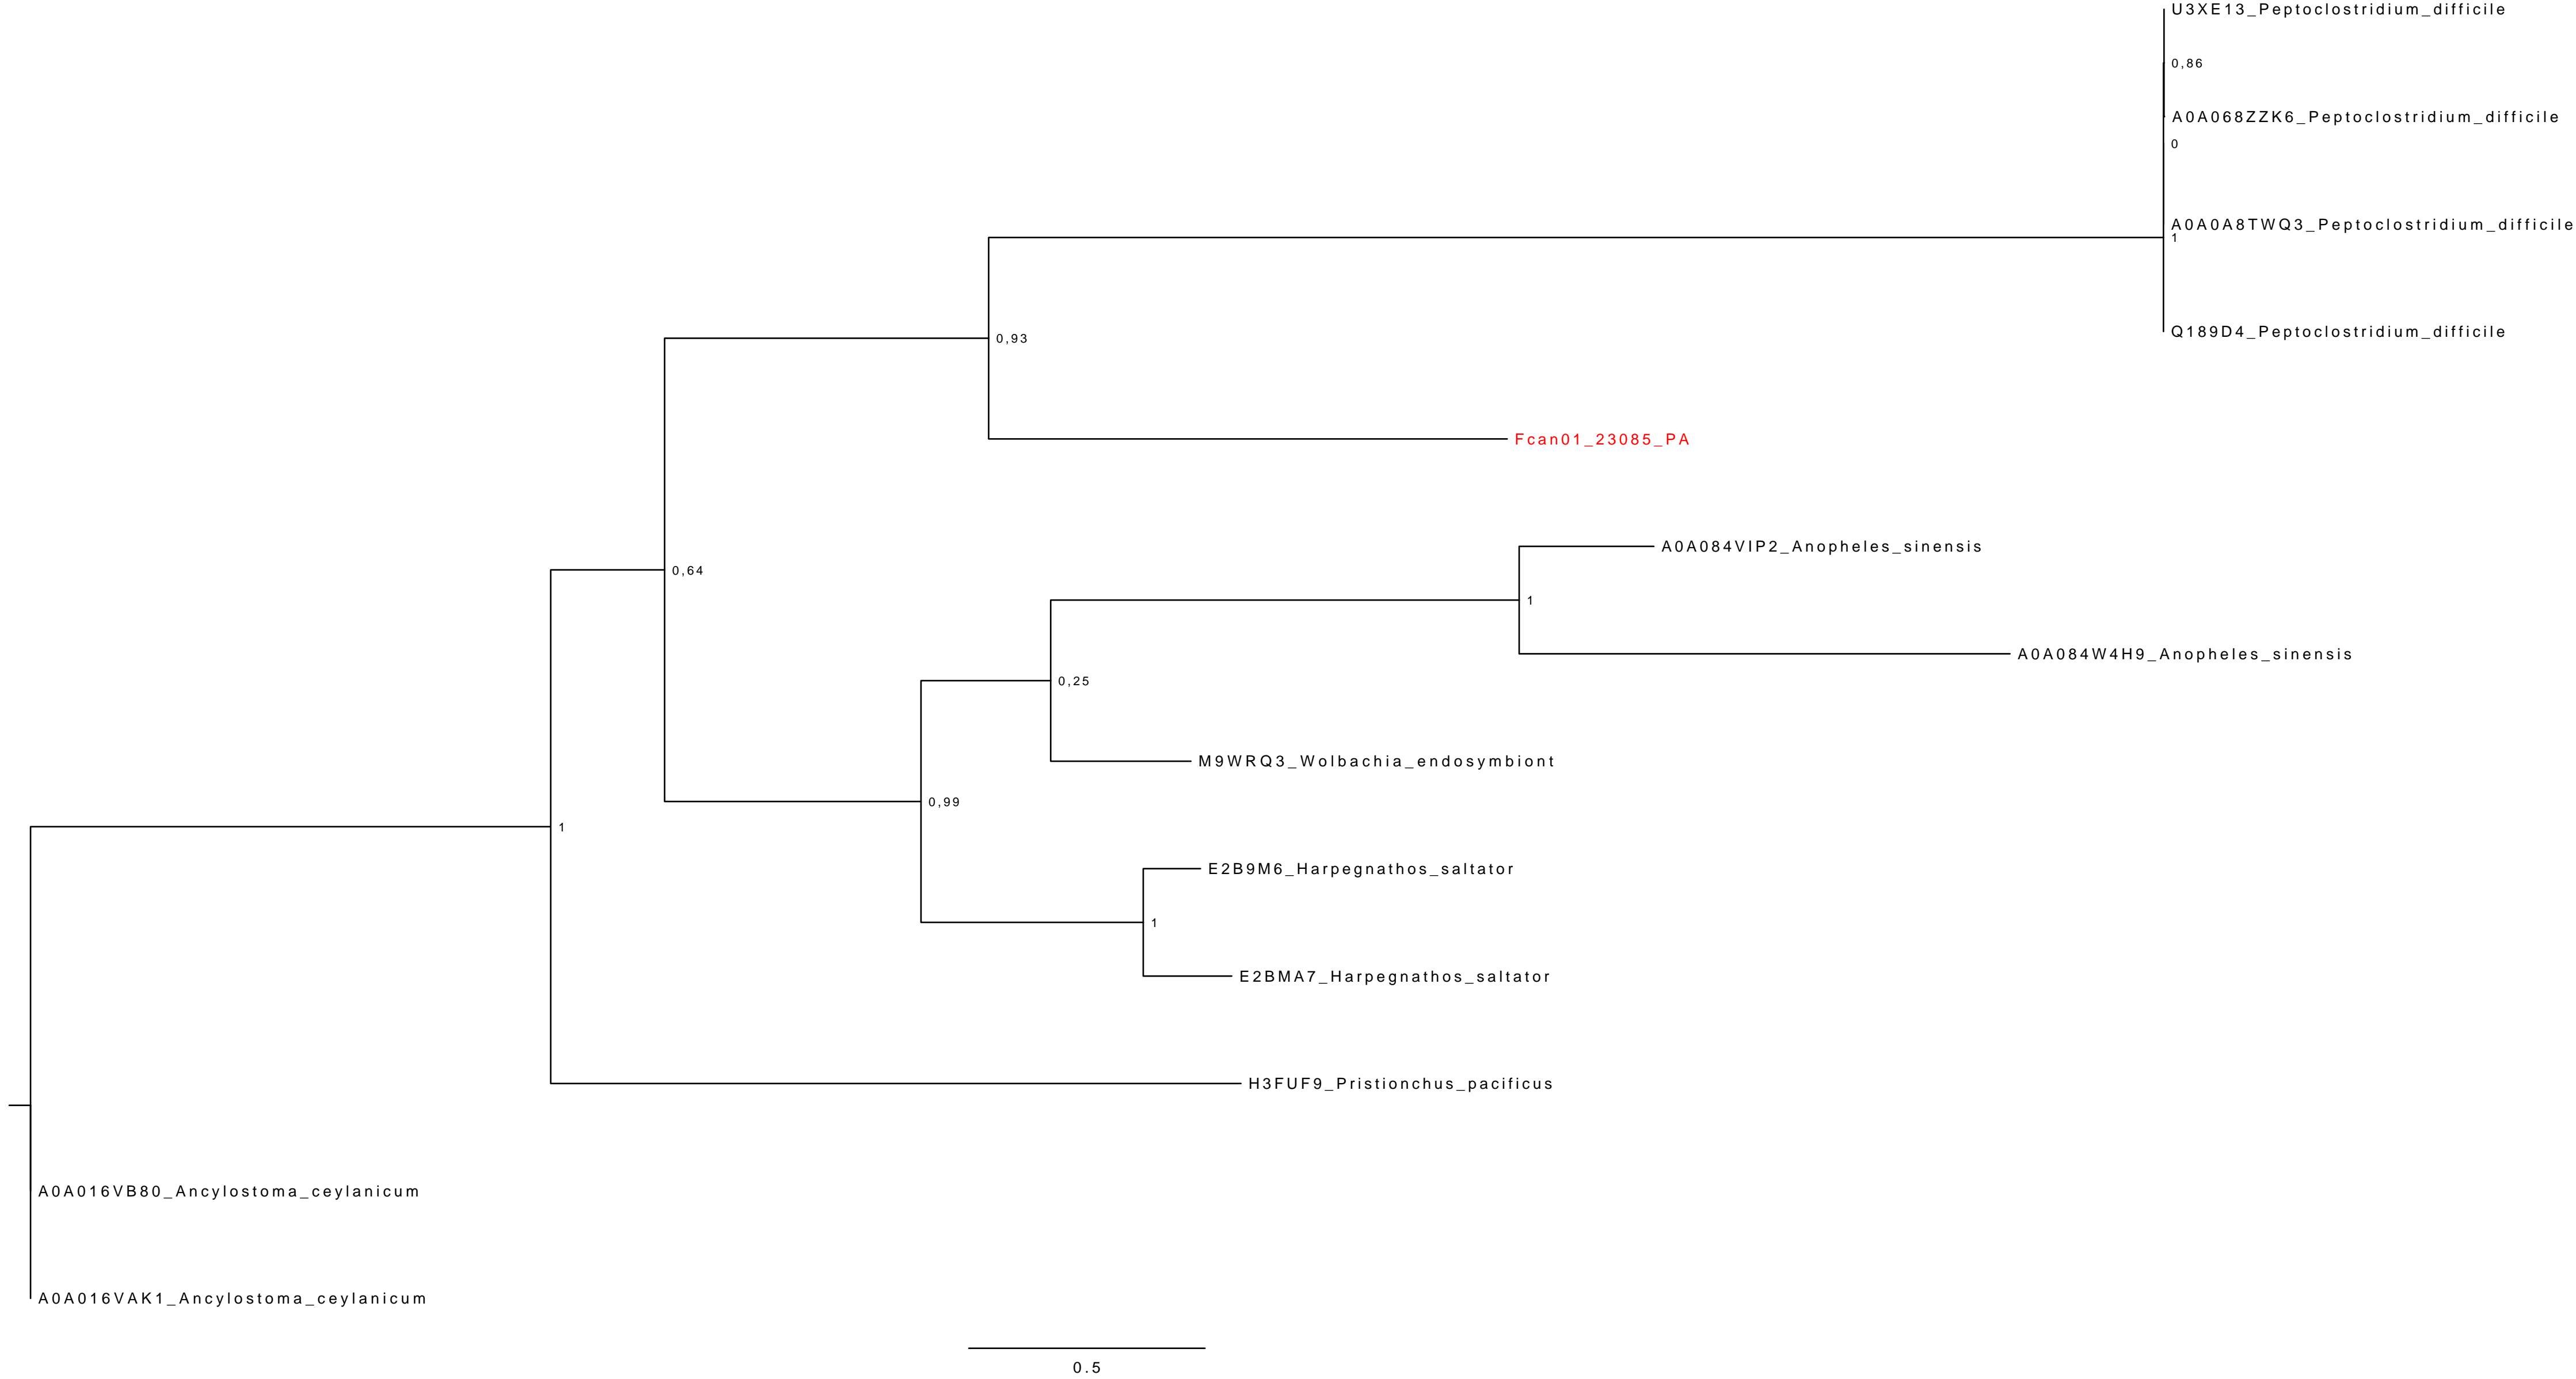

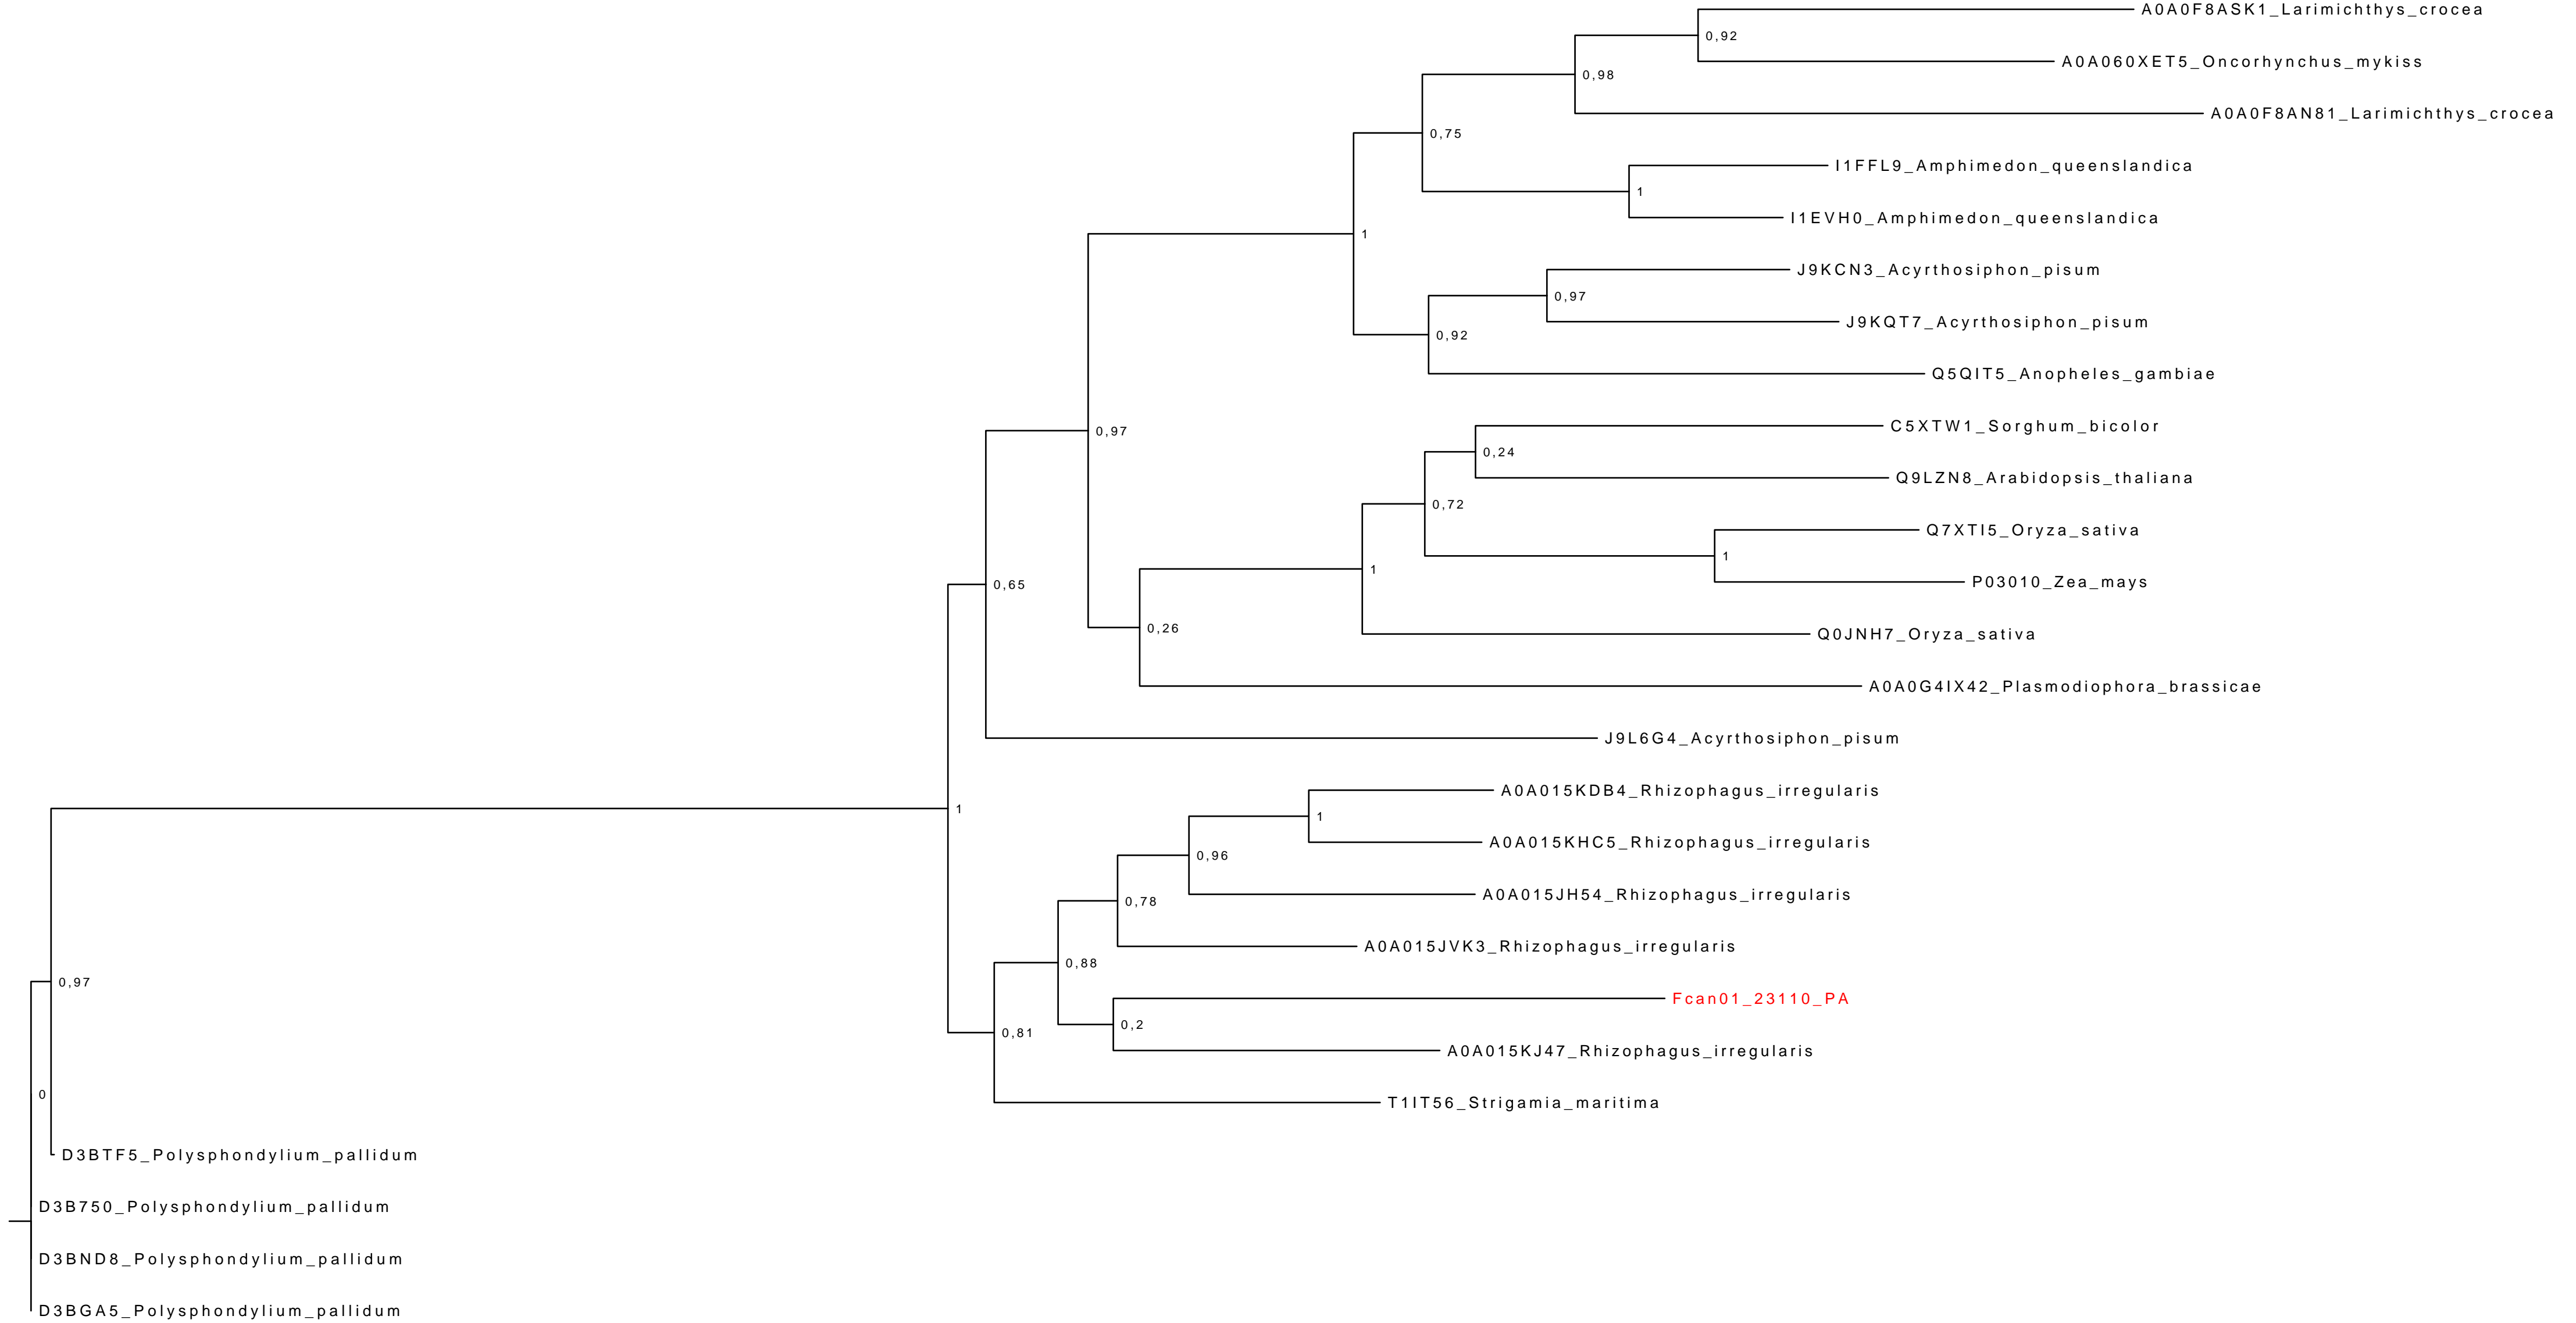

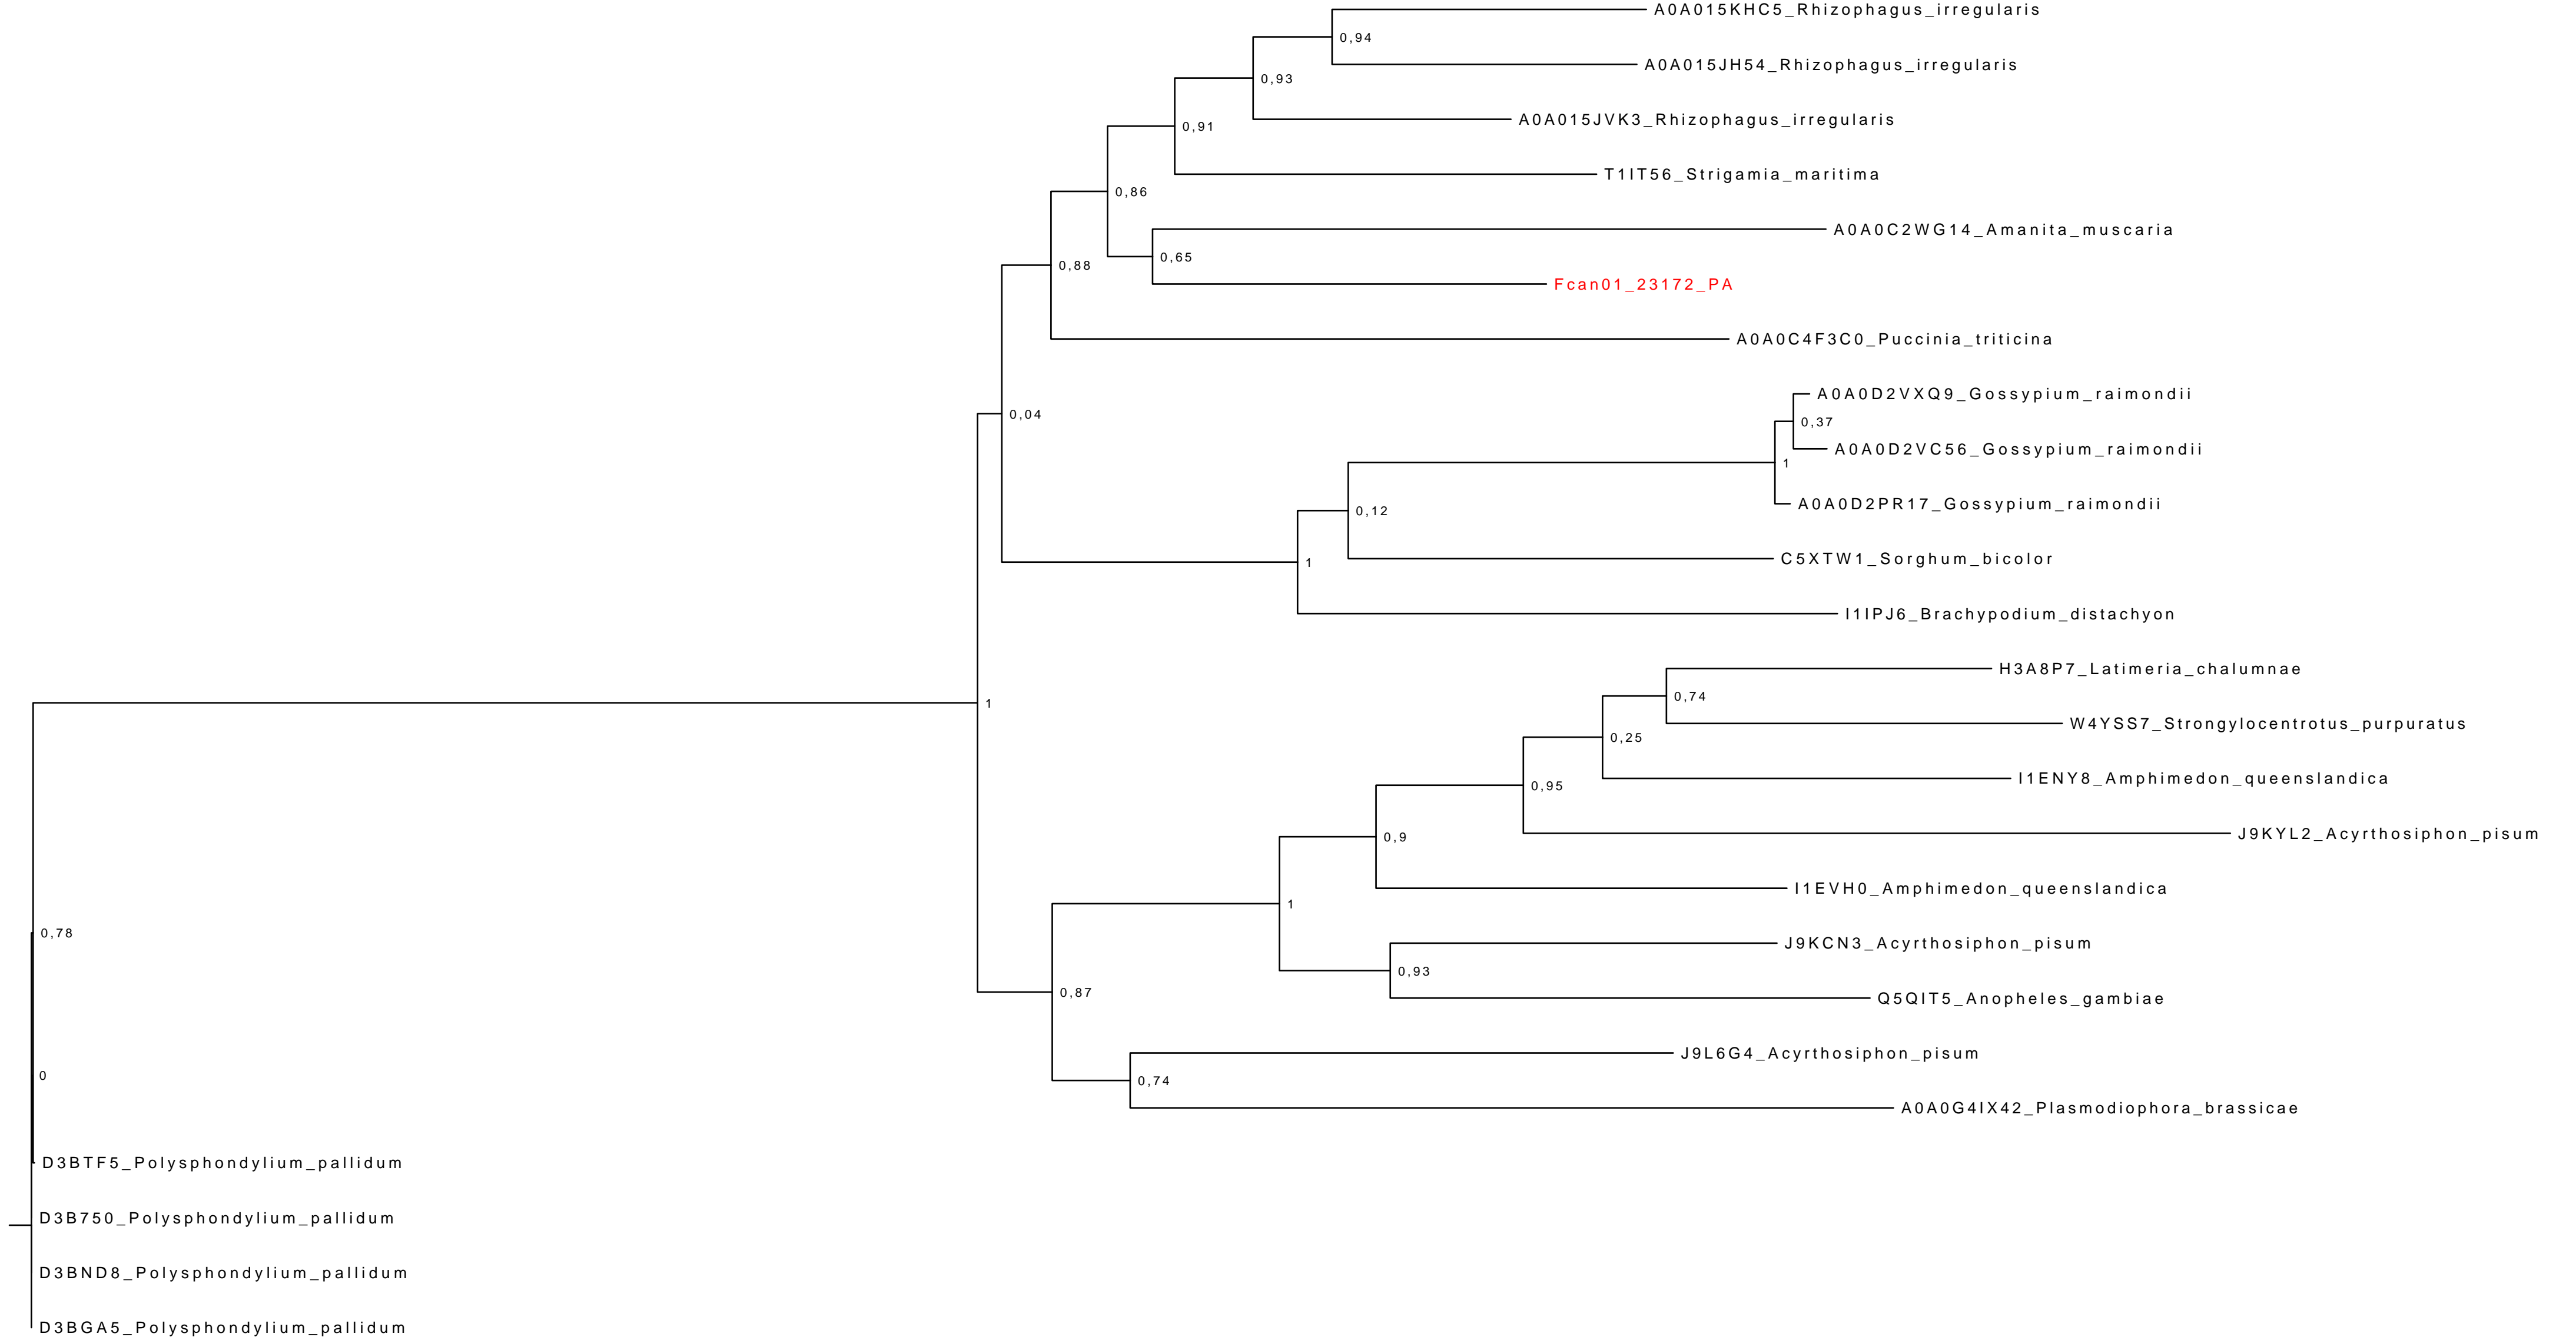

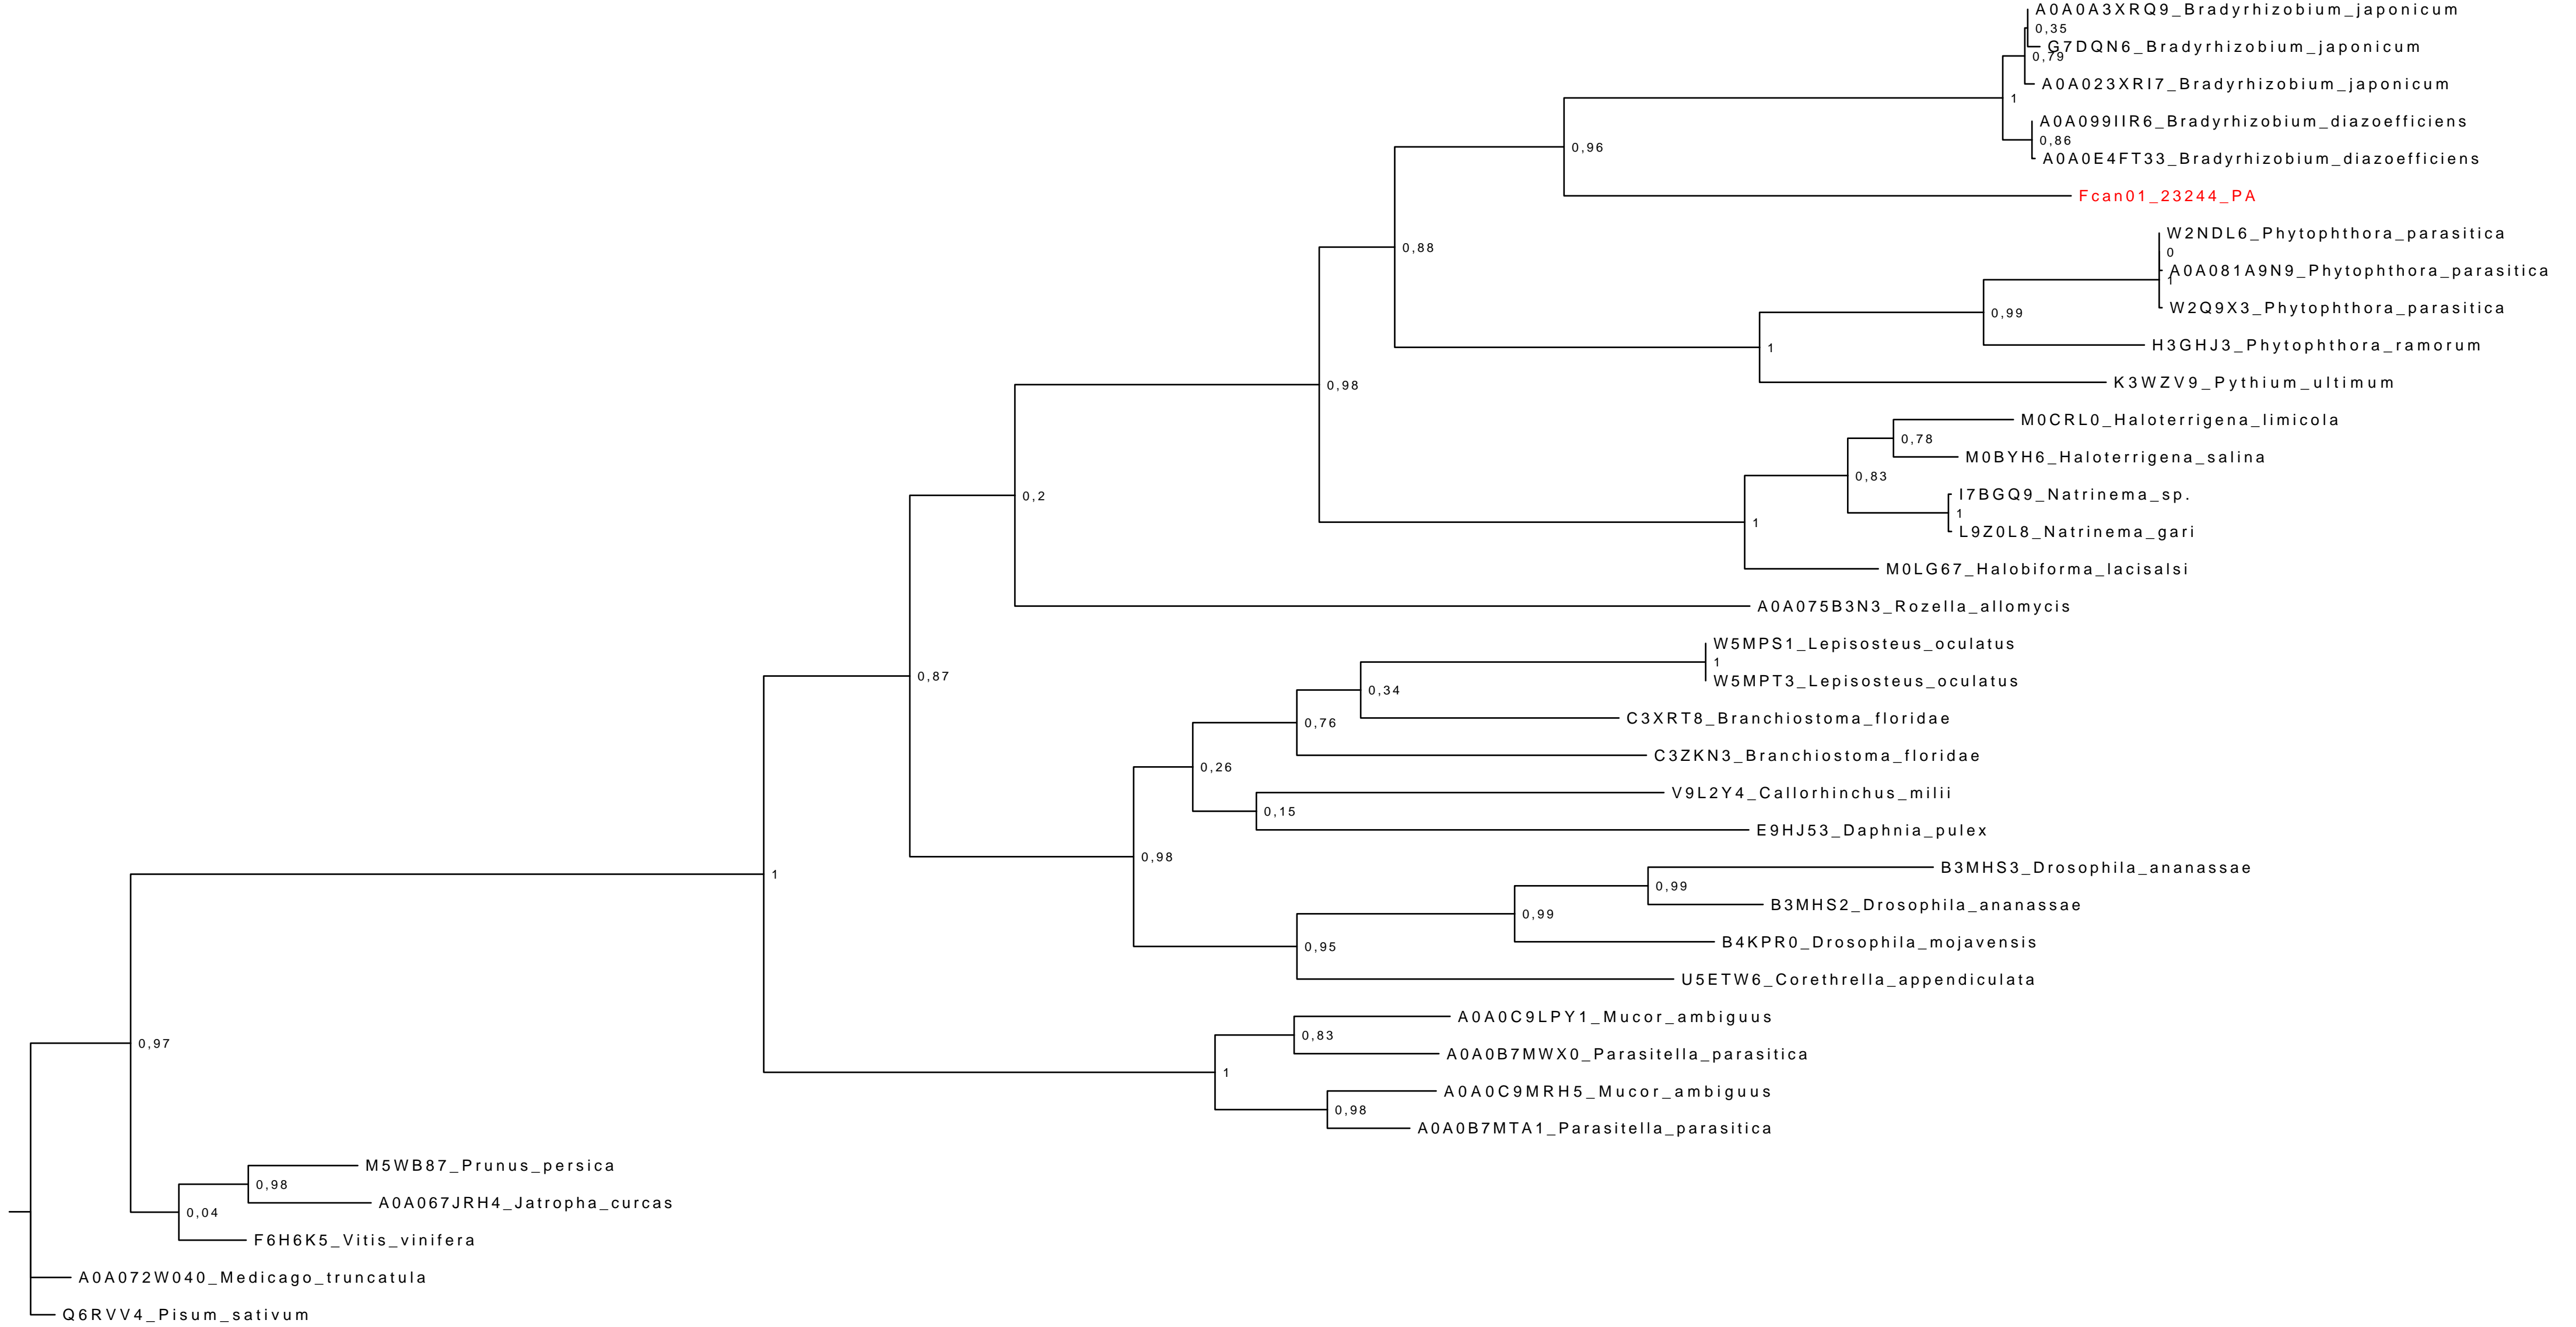

0.3



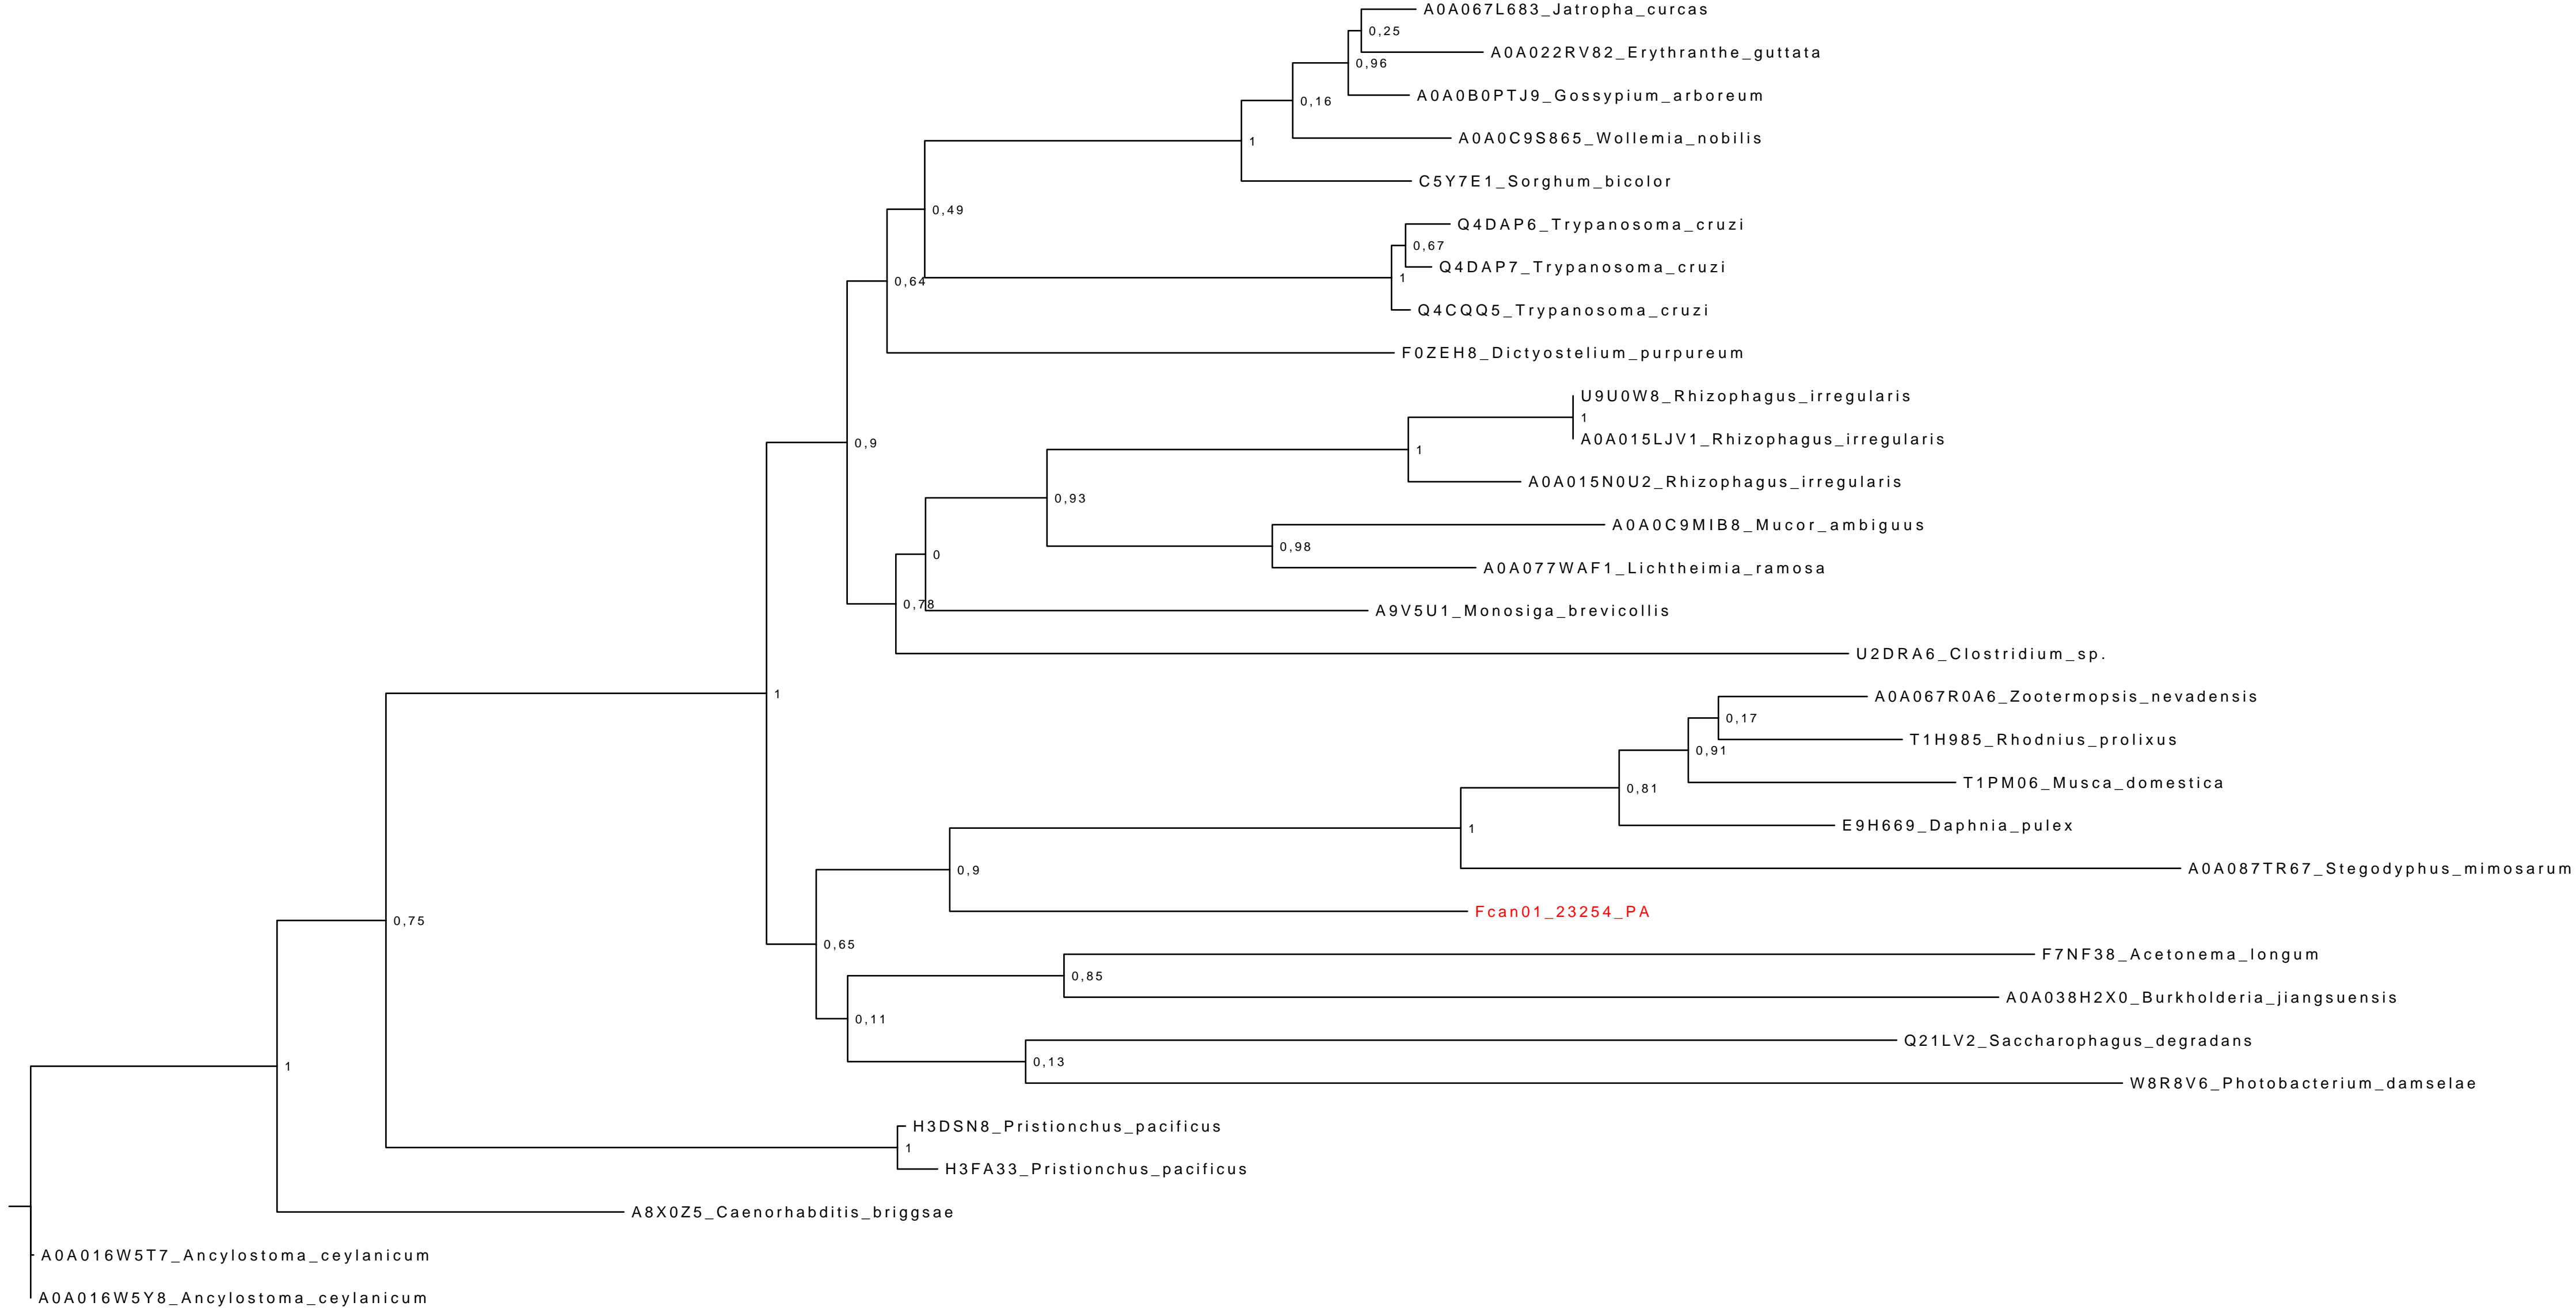

0.6

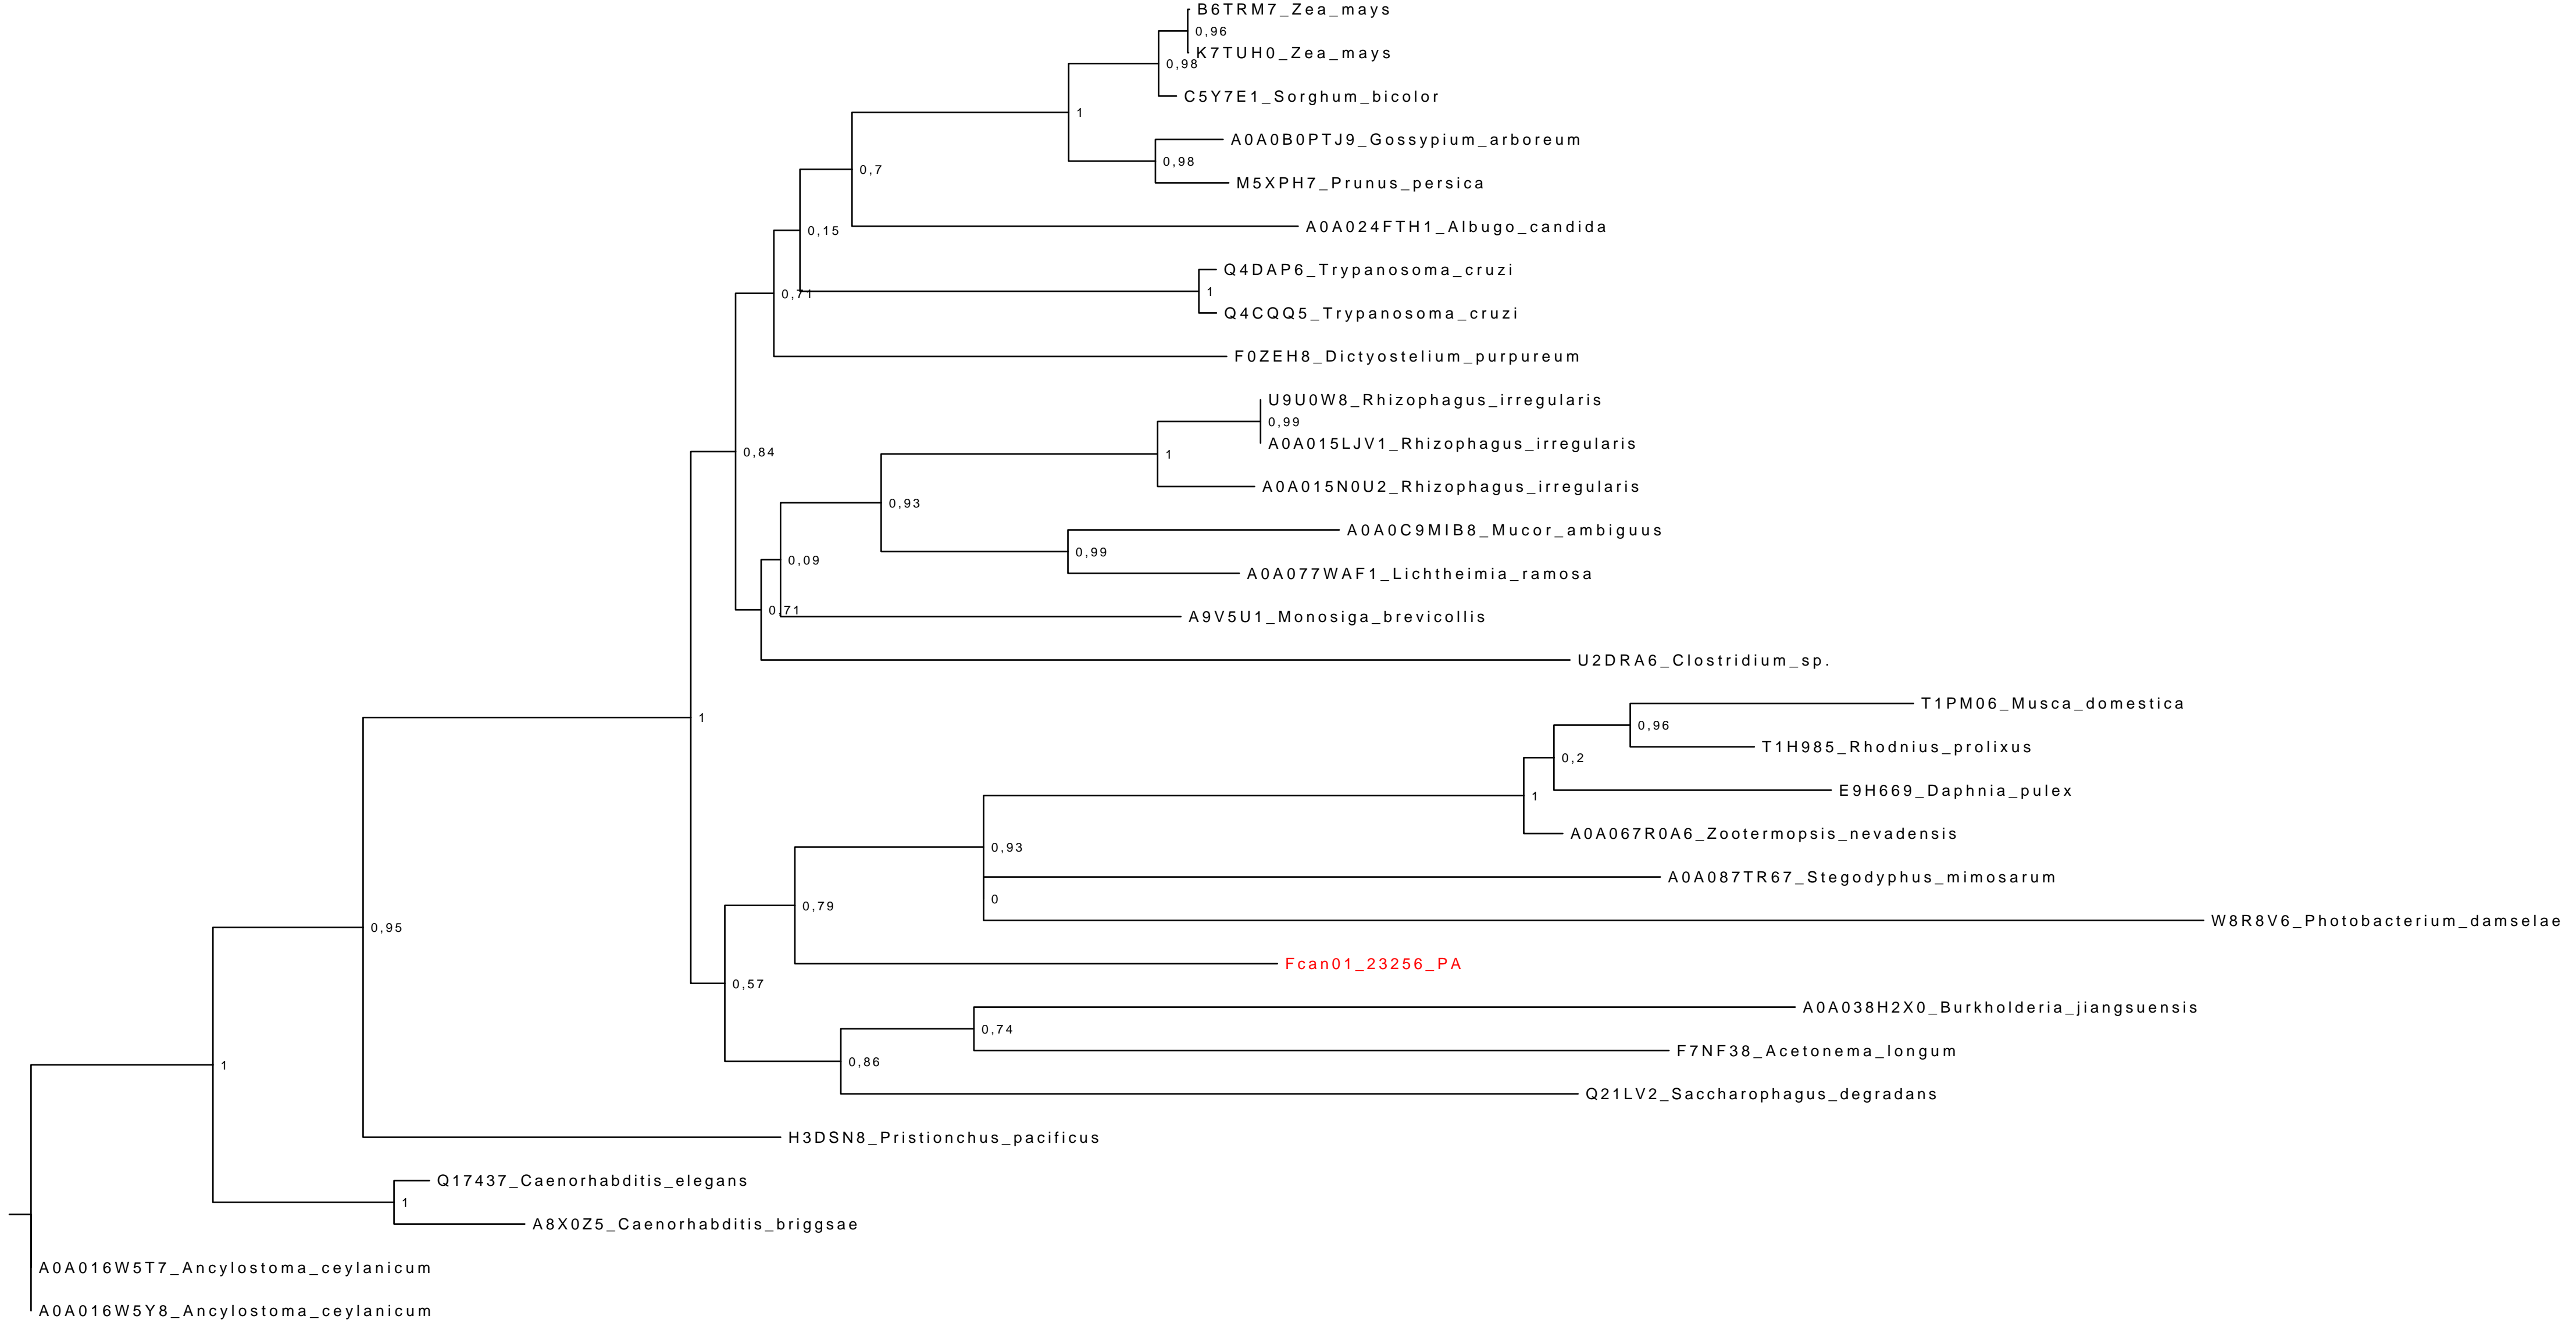

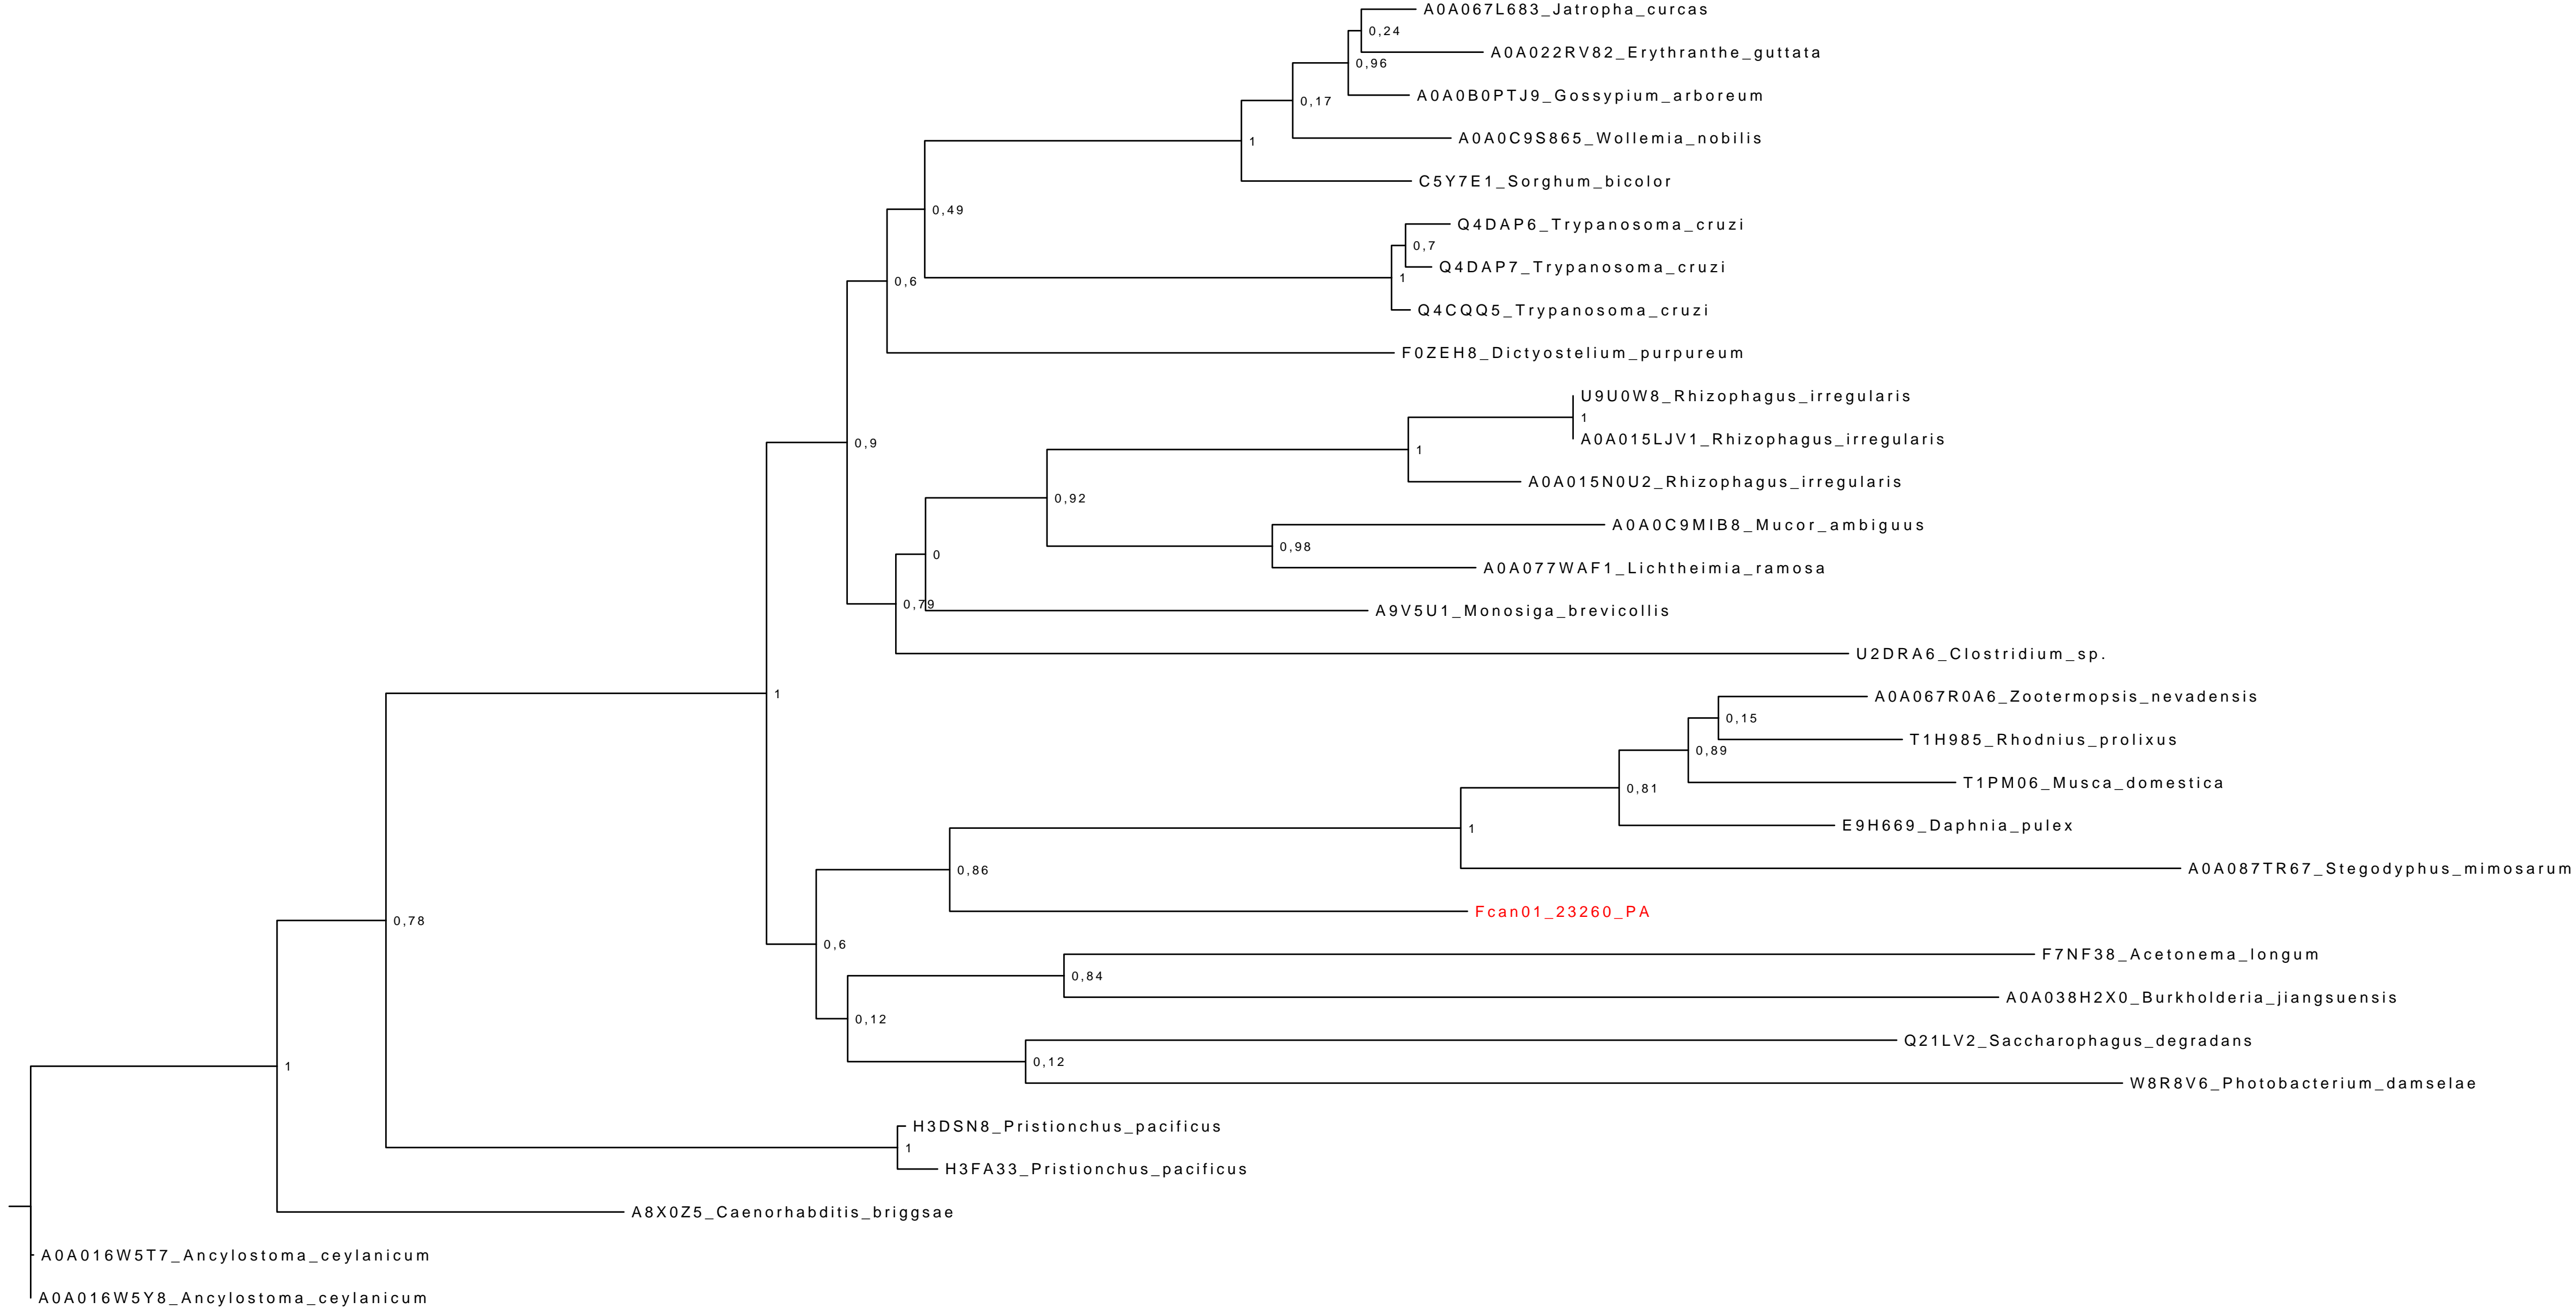

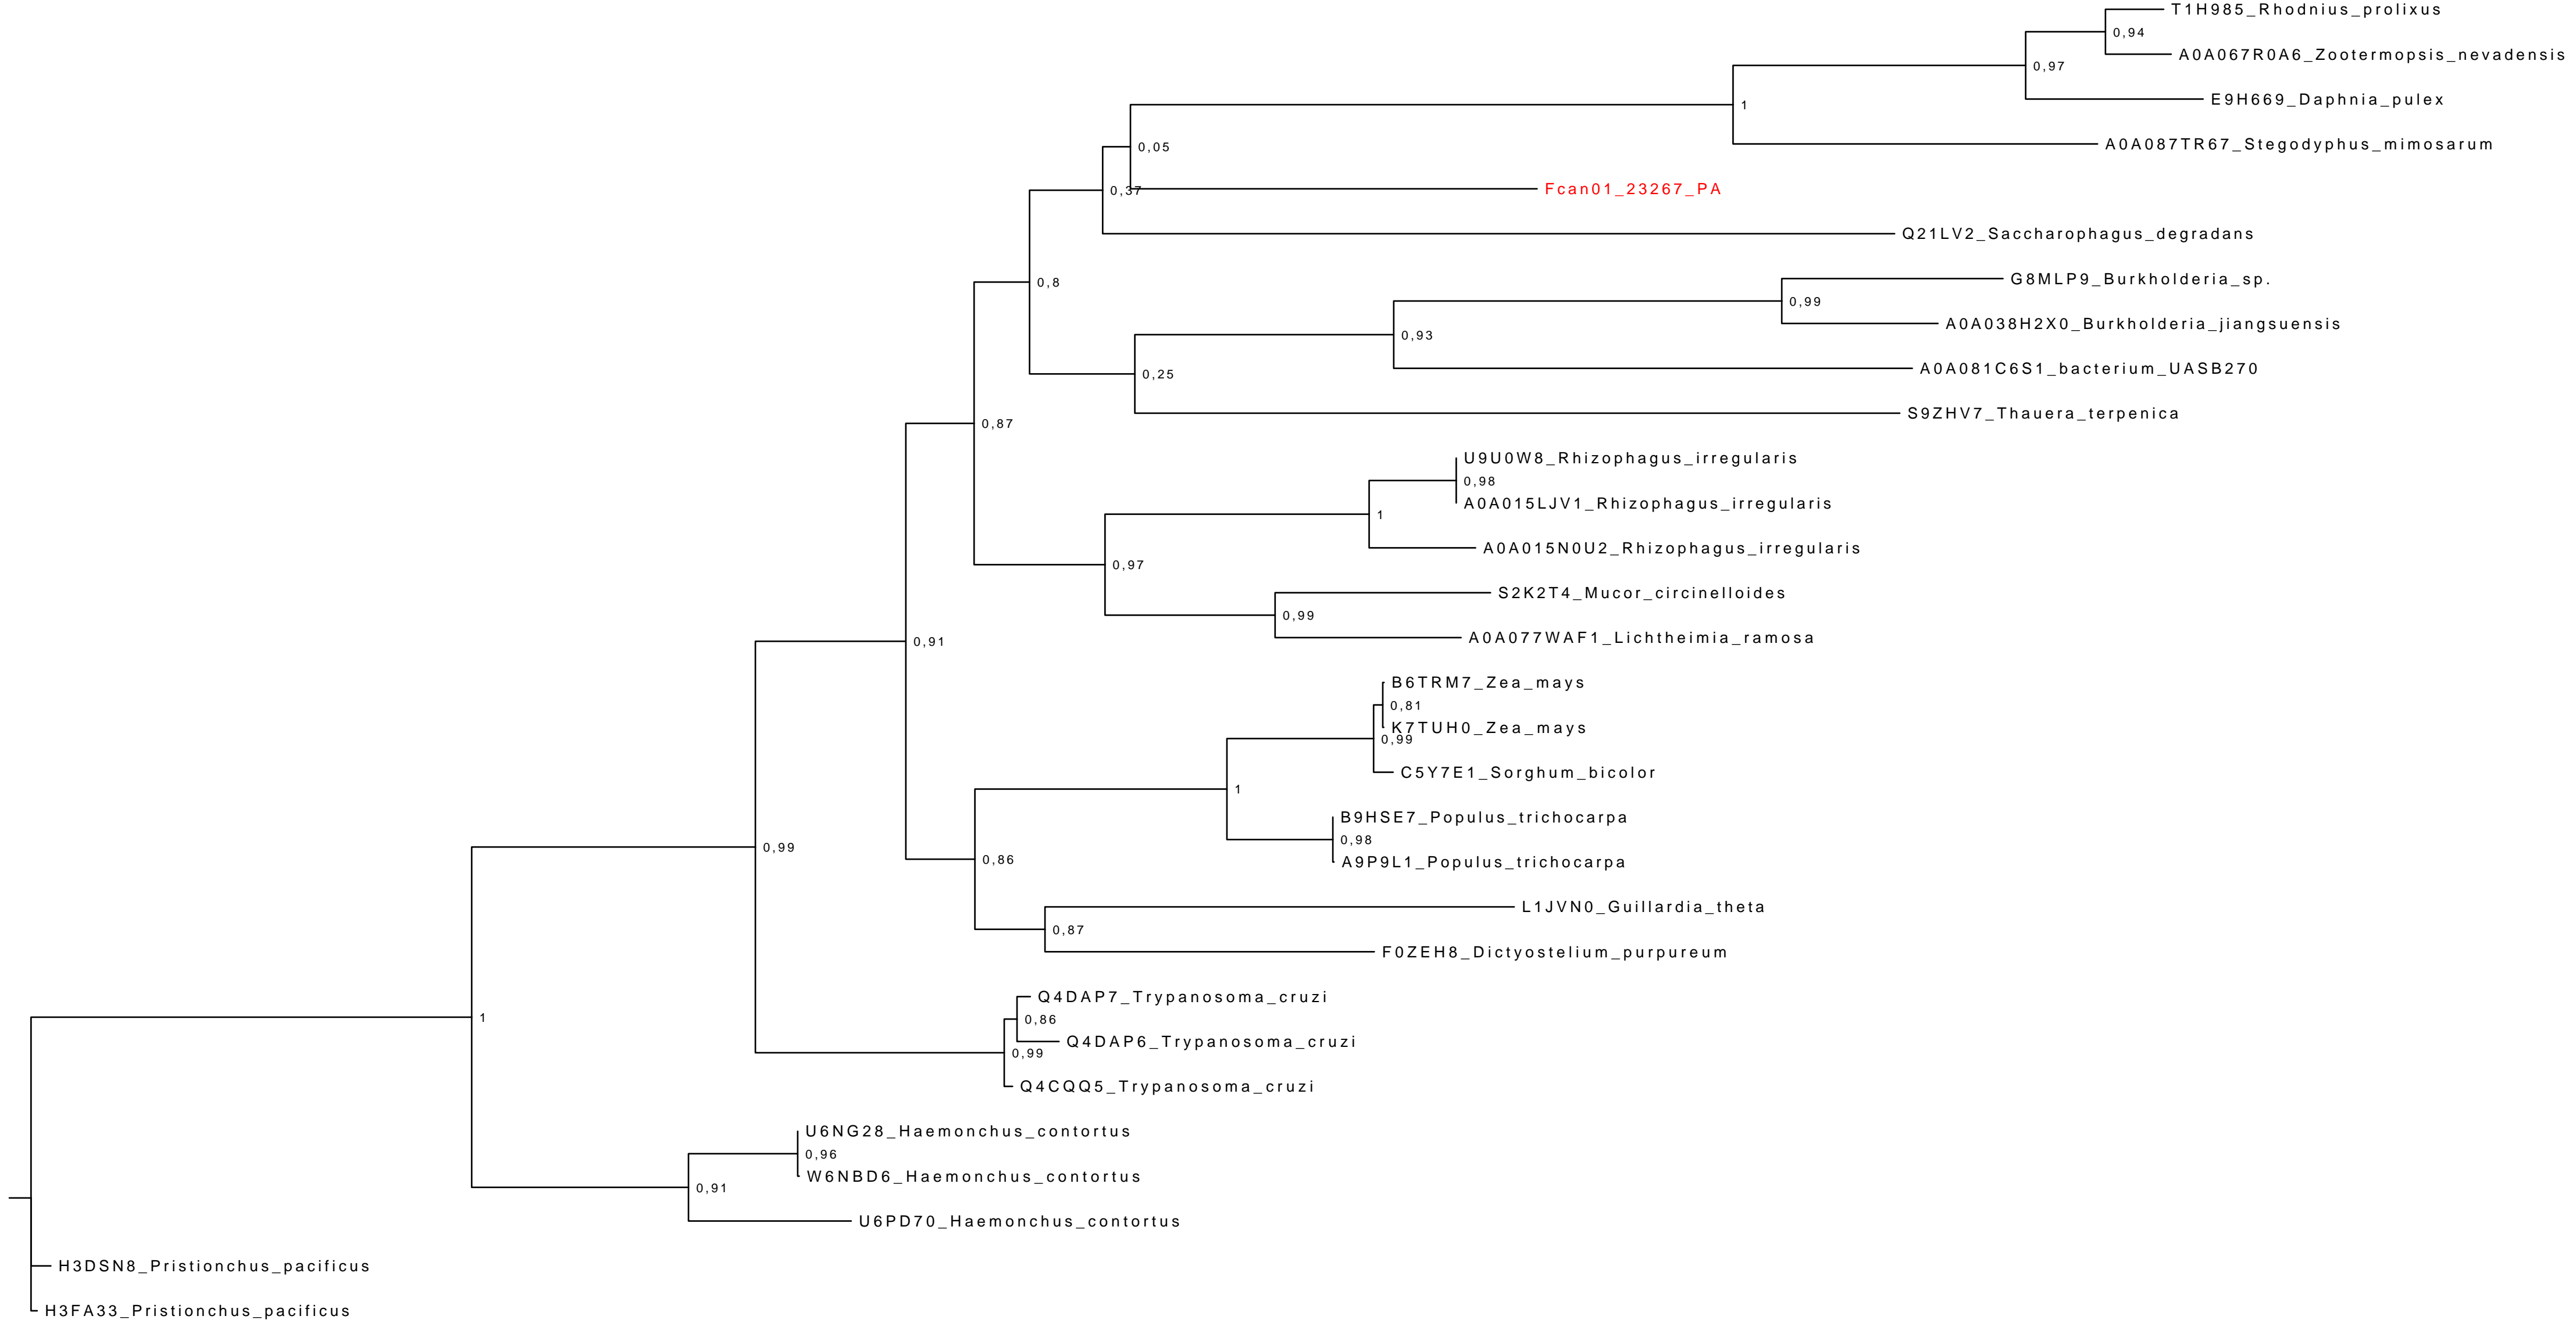

0.6

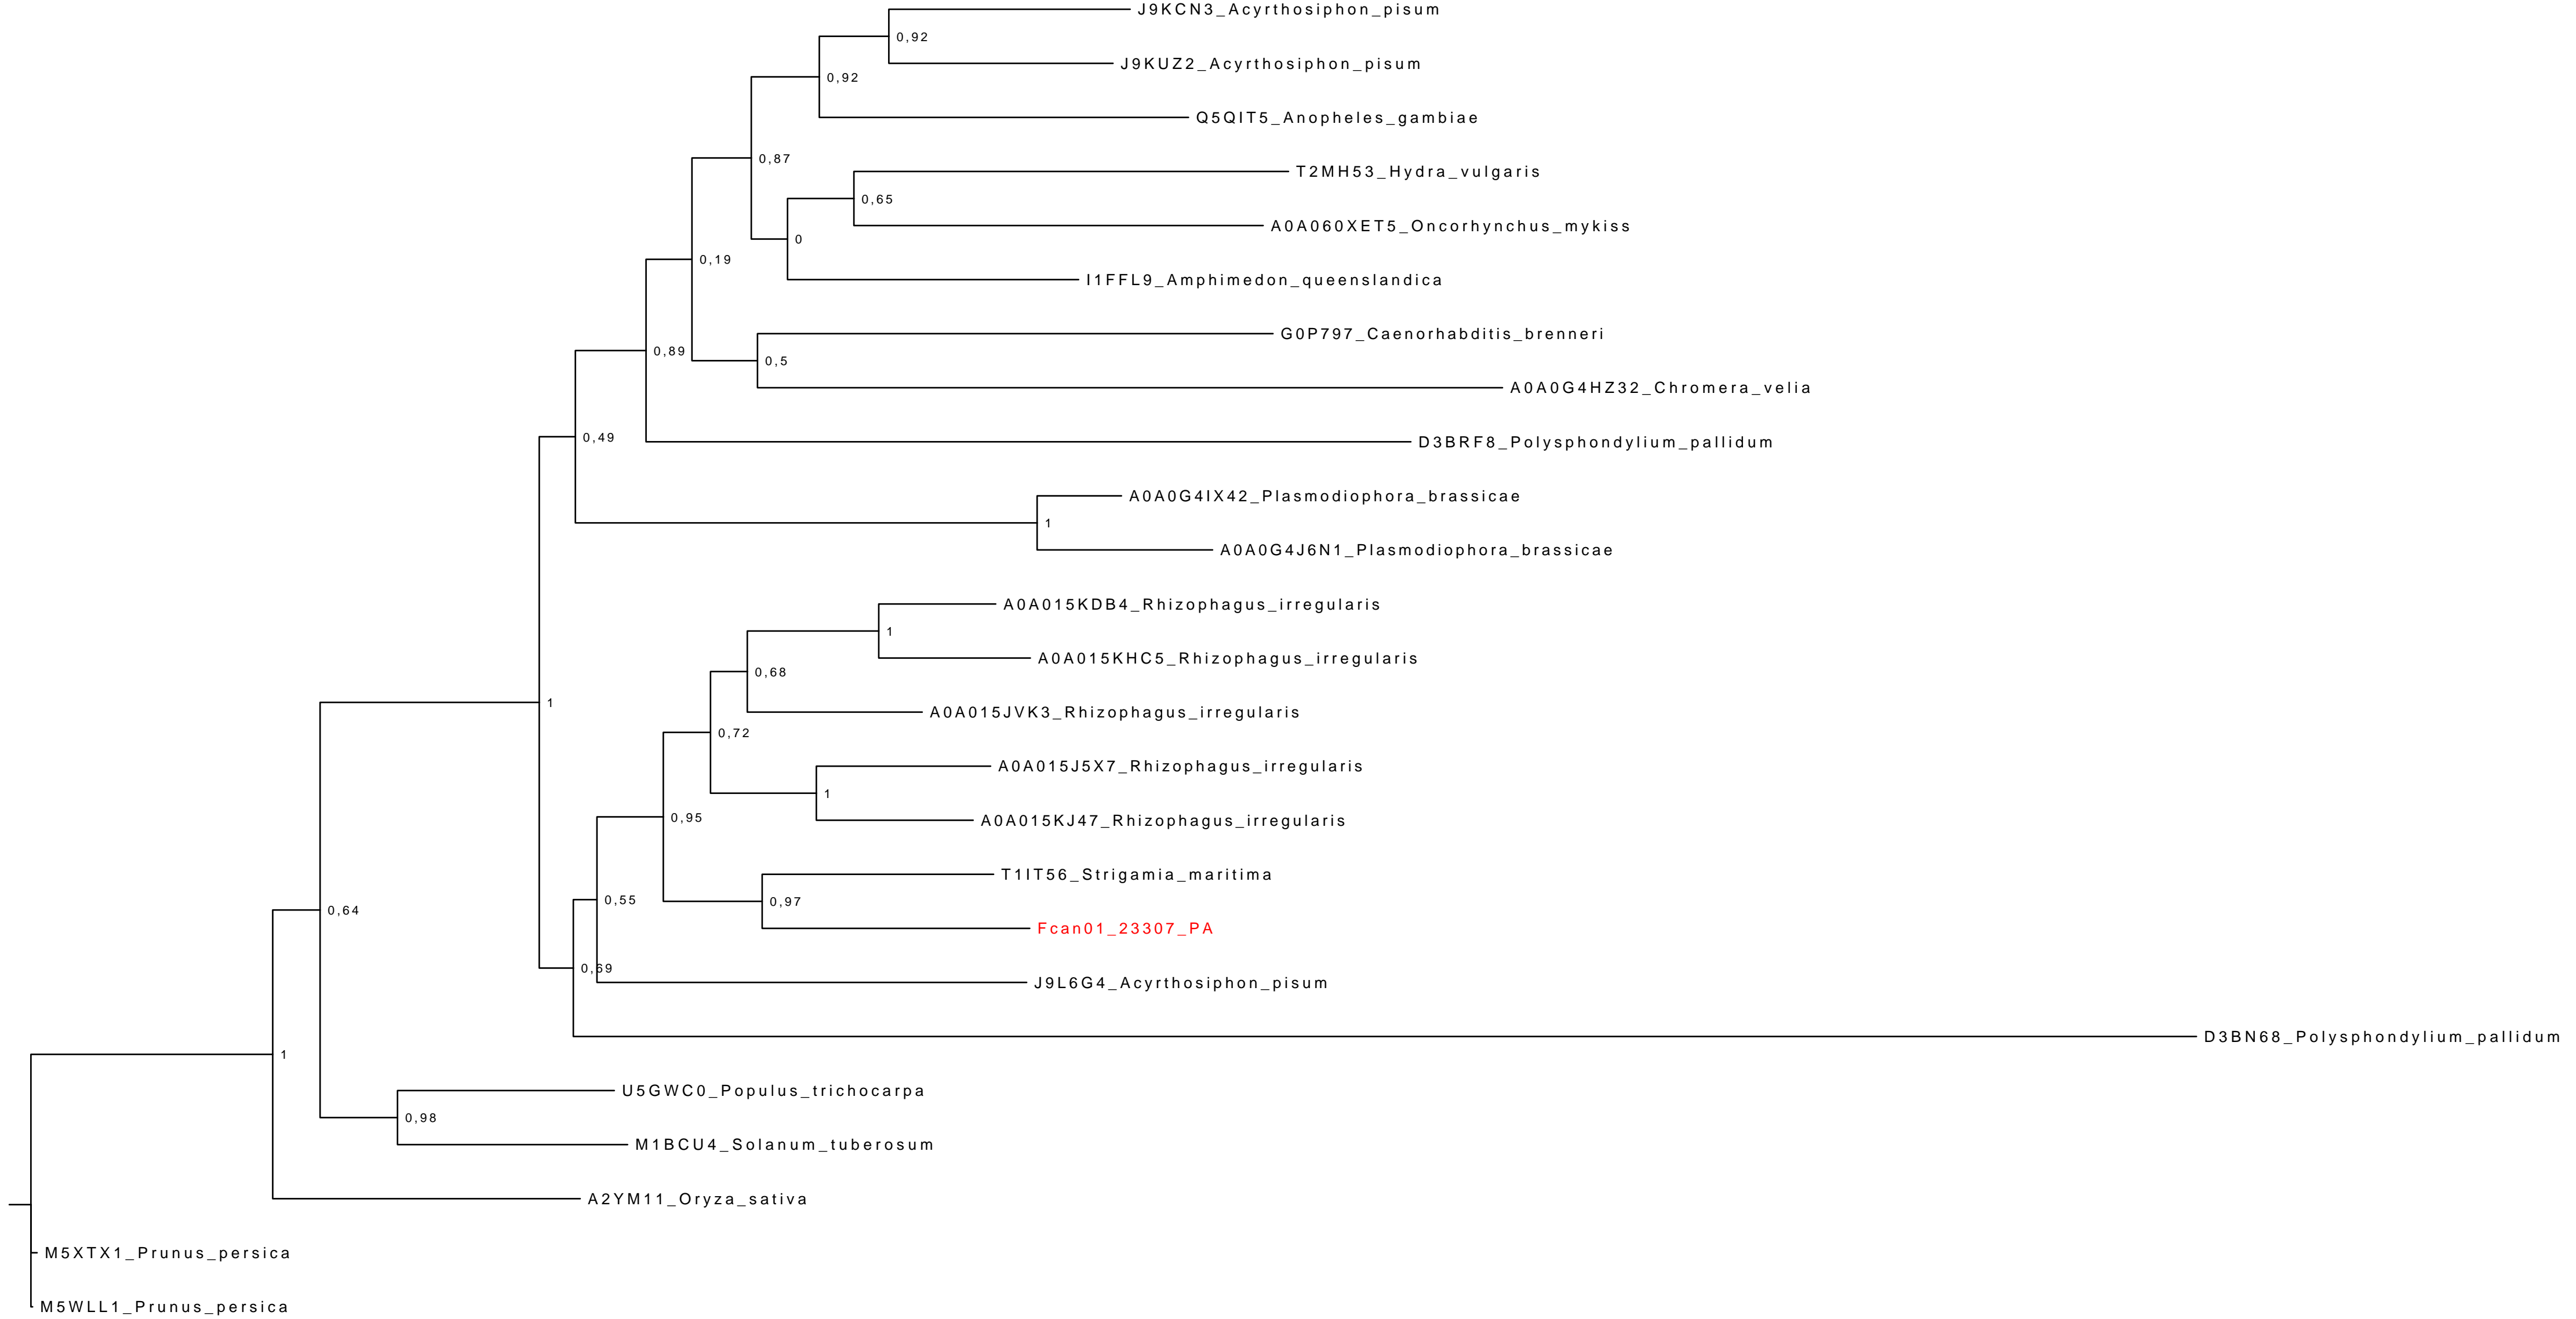

0.7

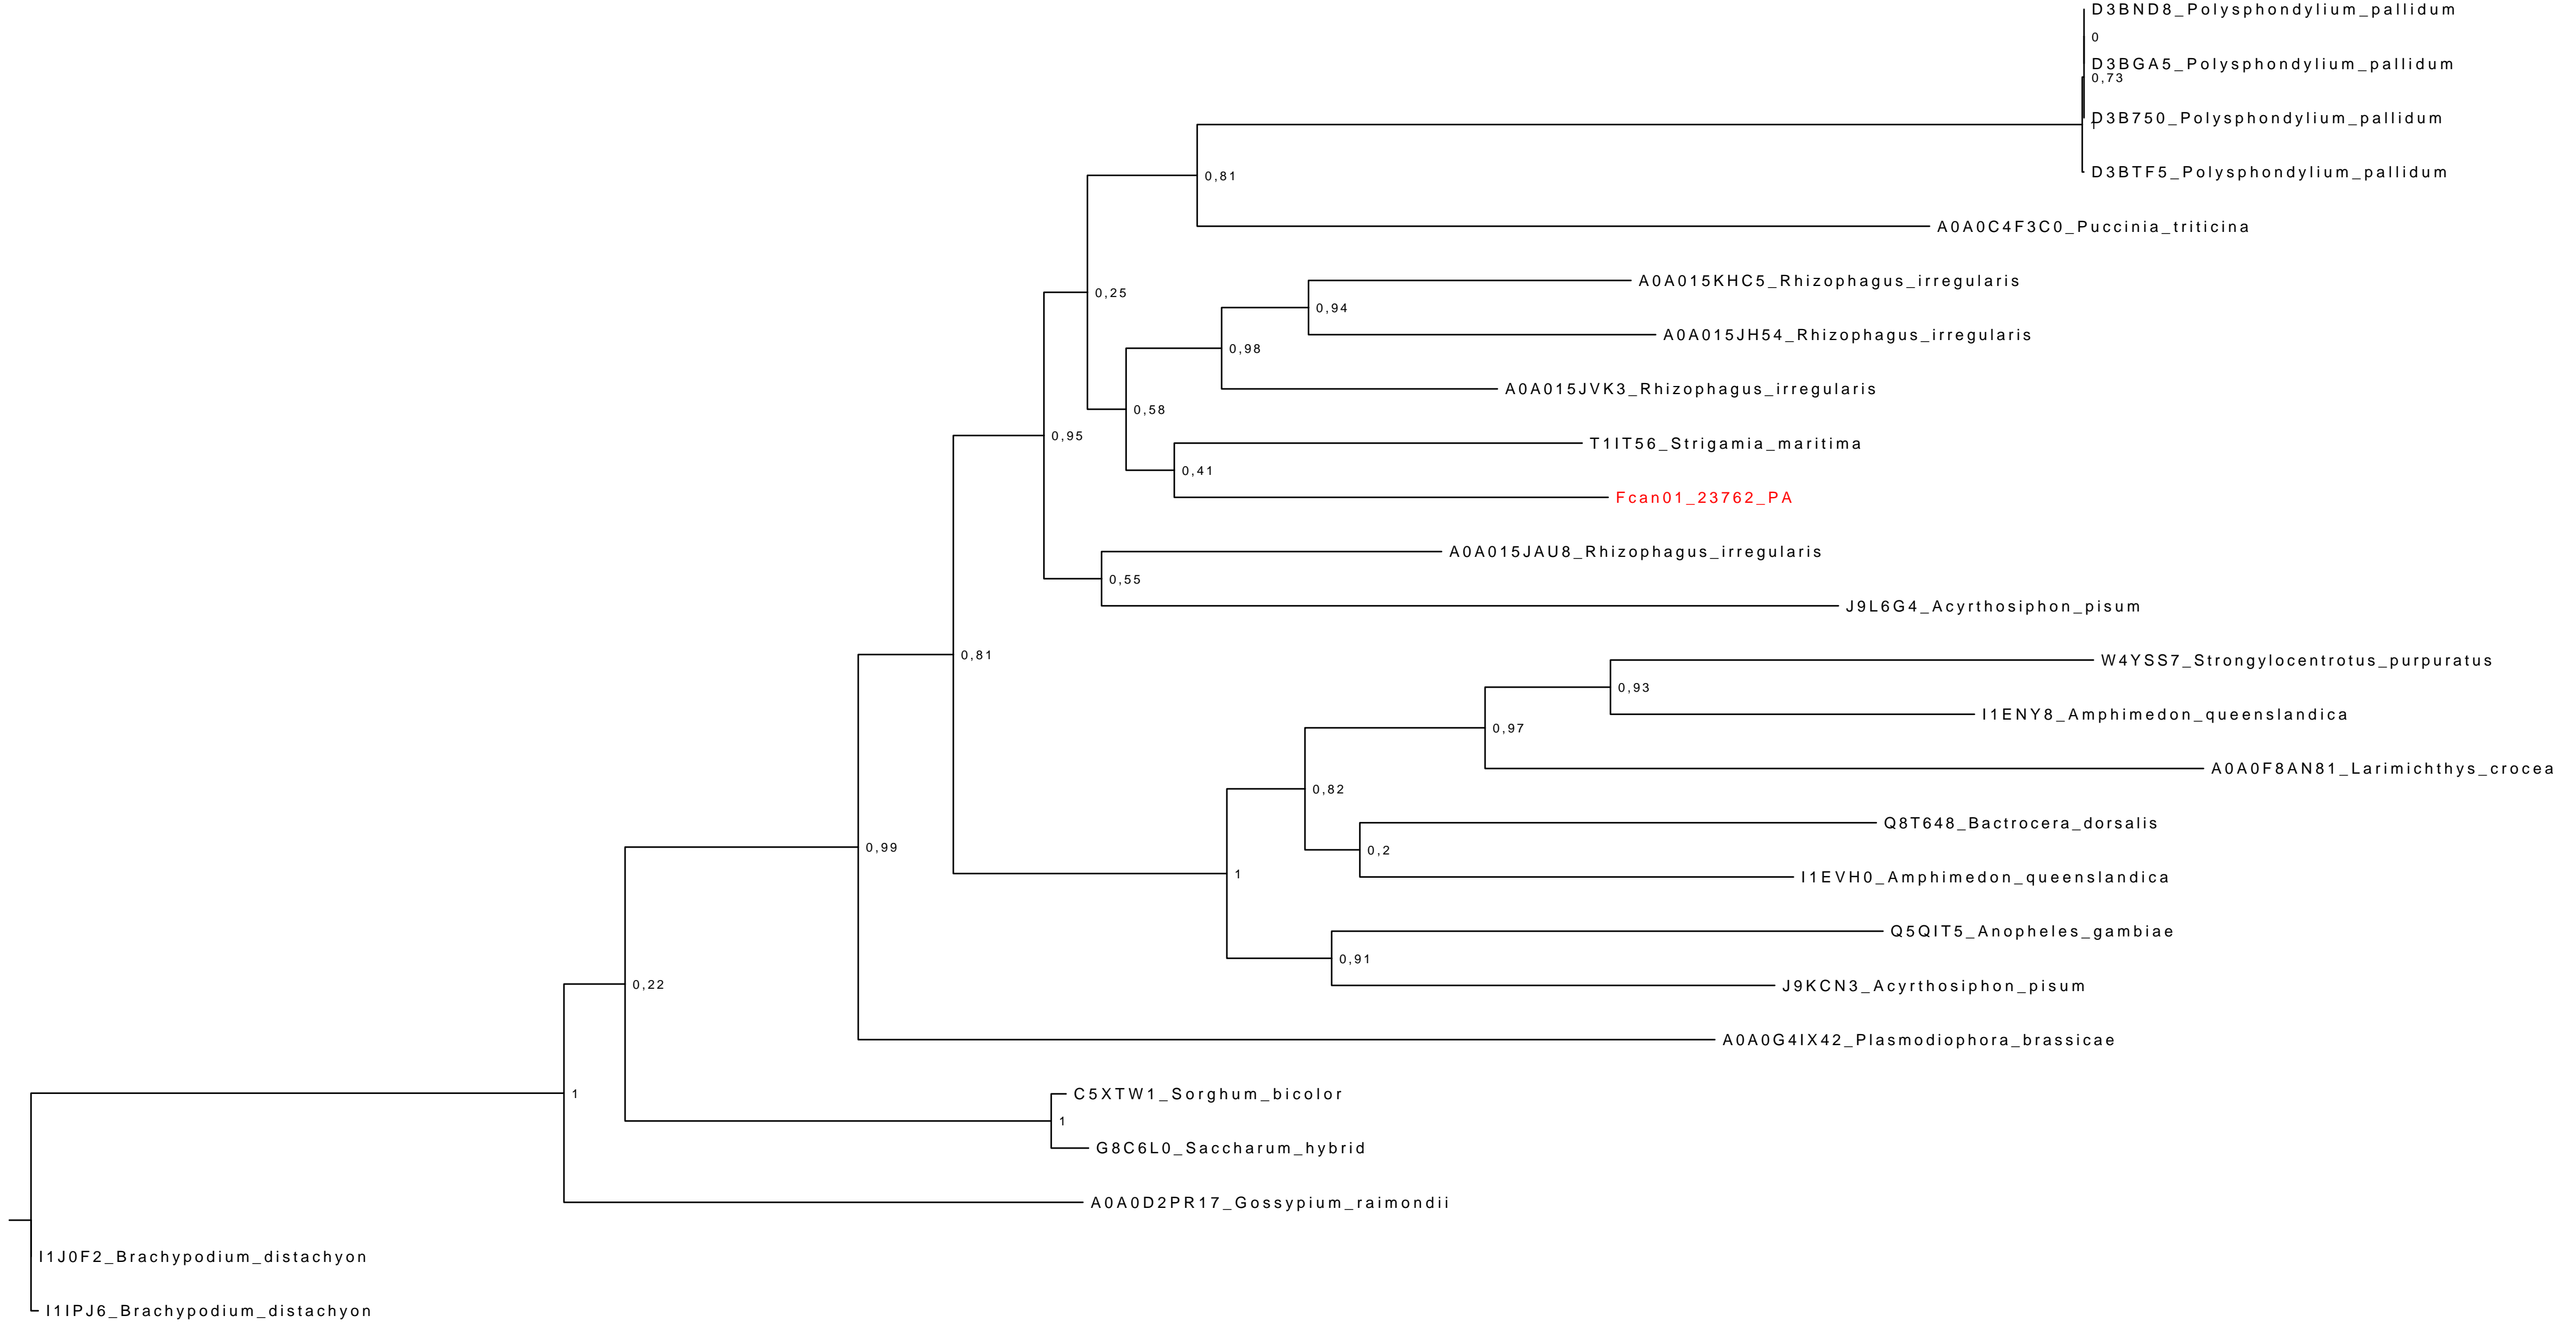

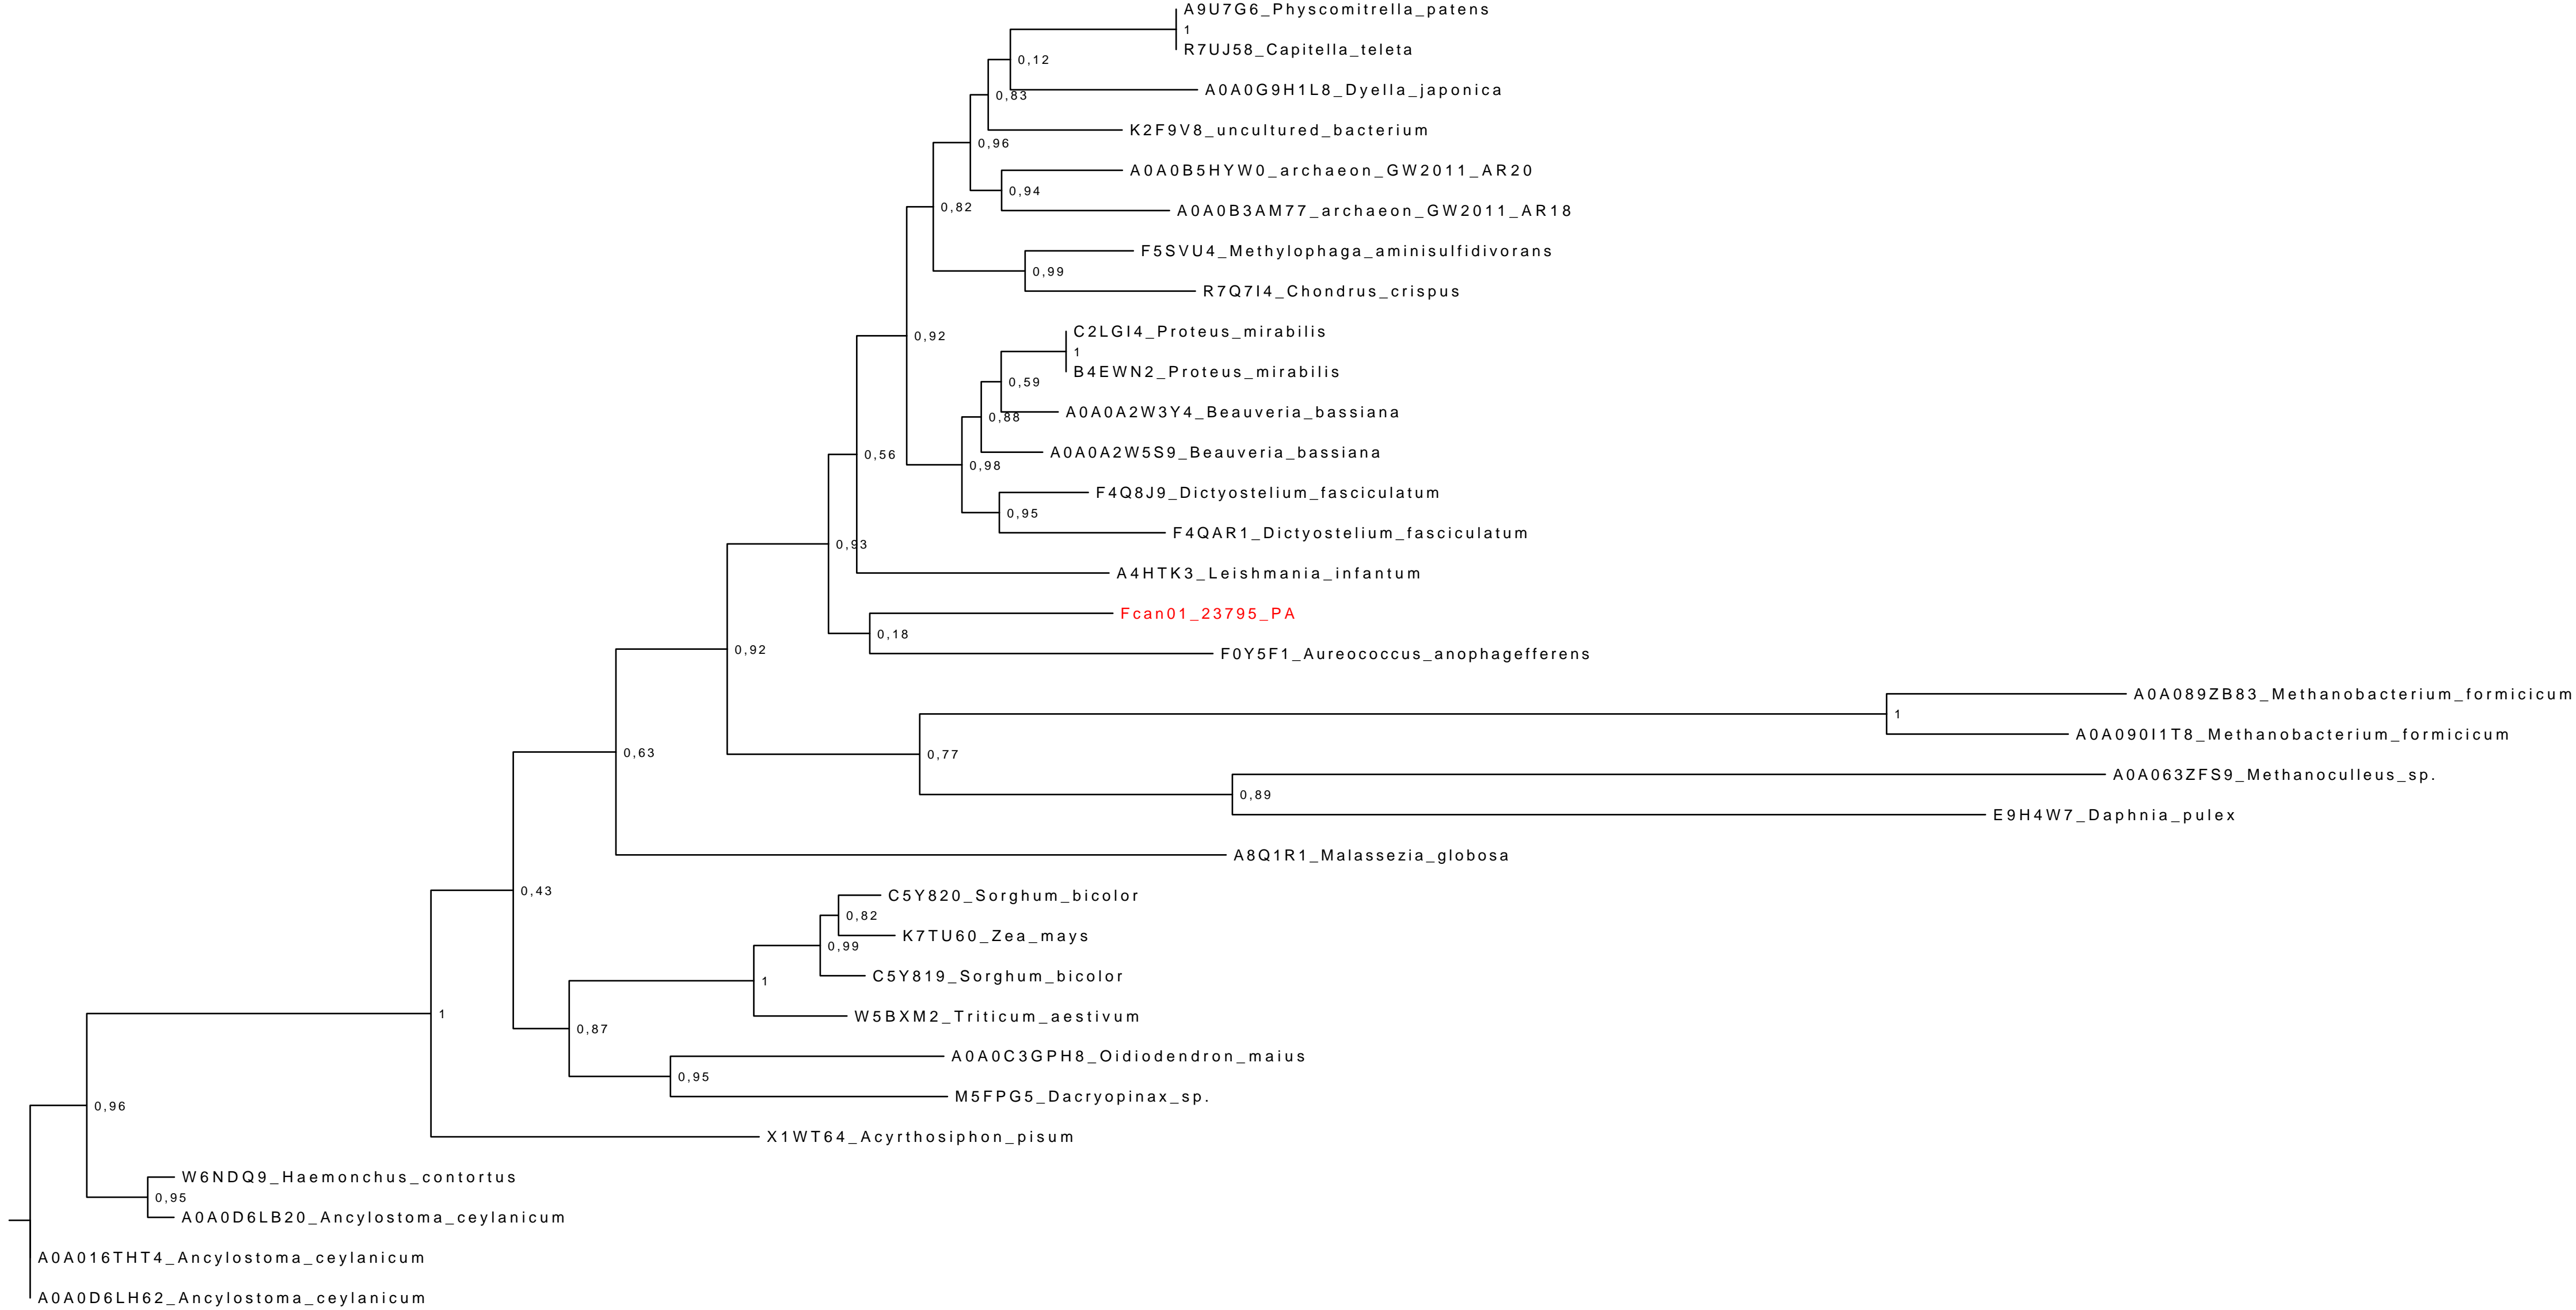

0.7

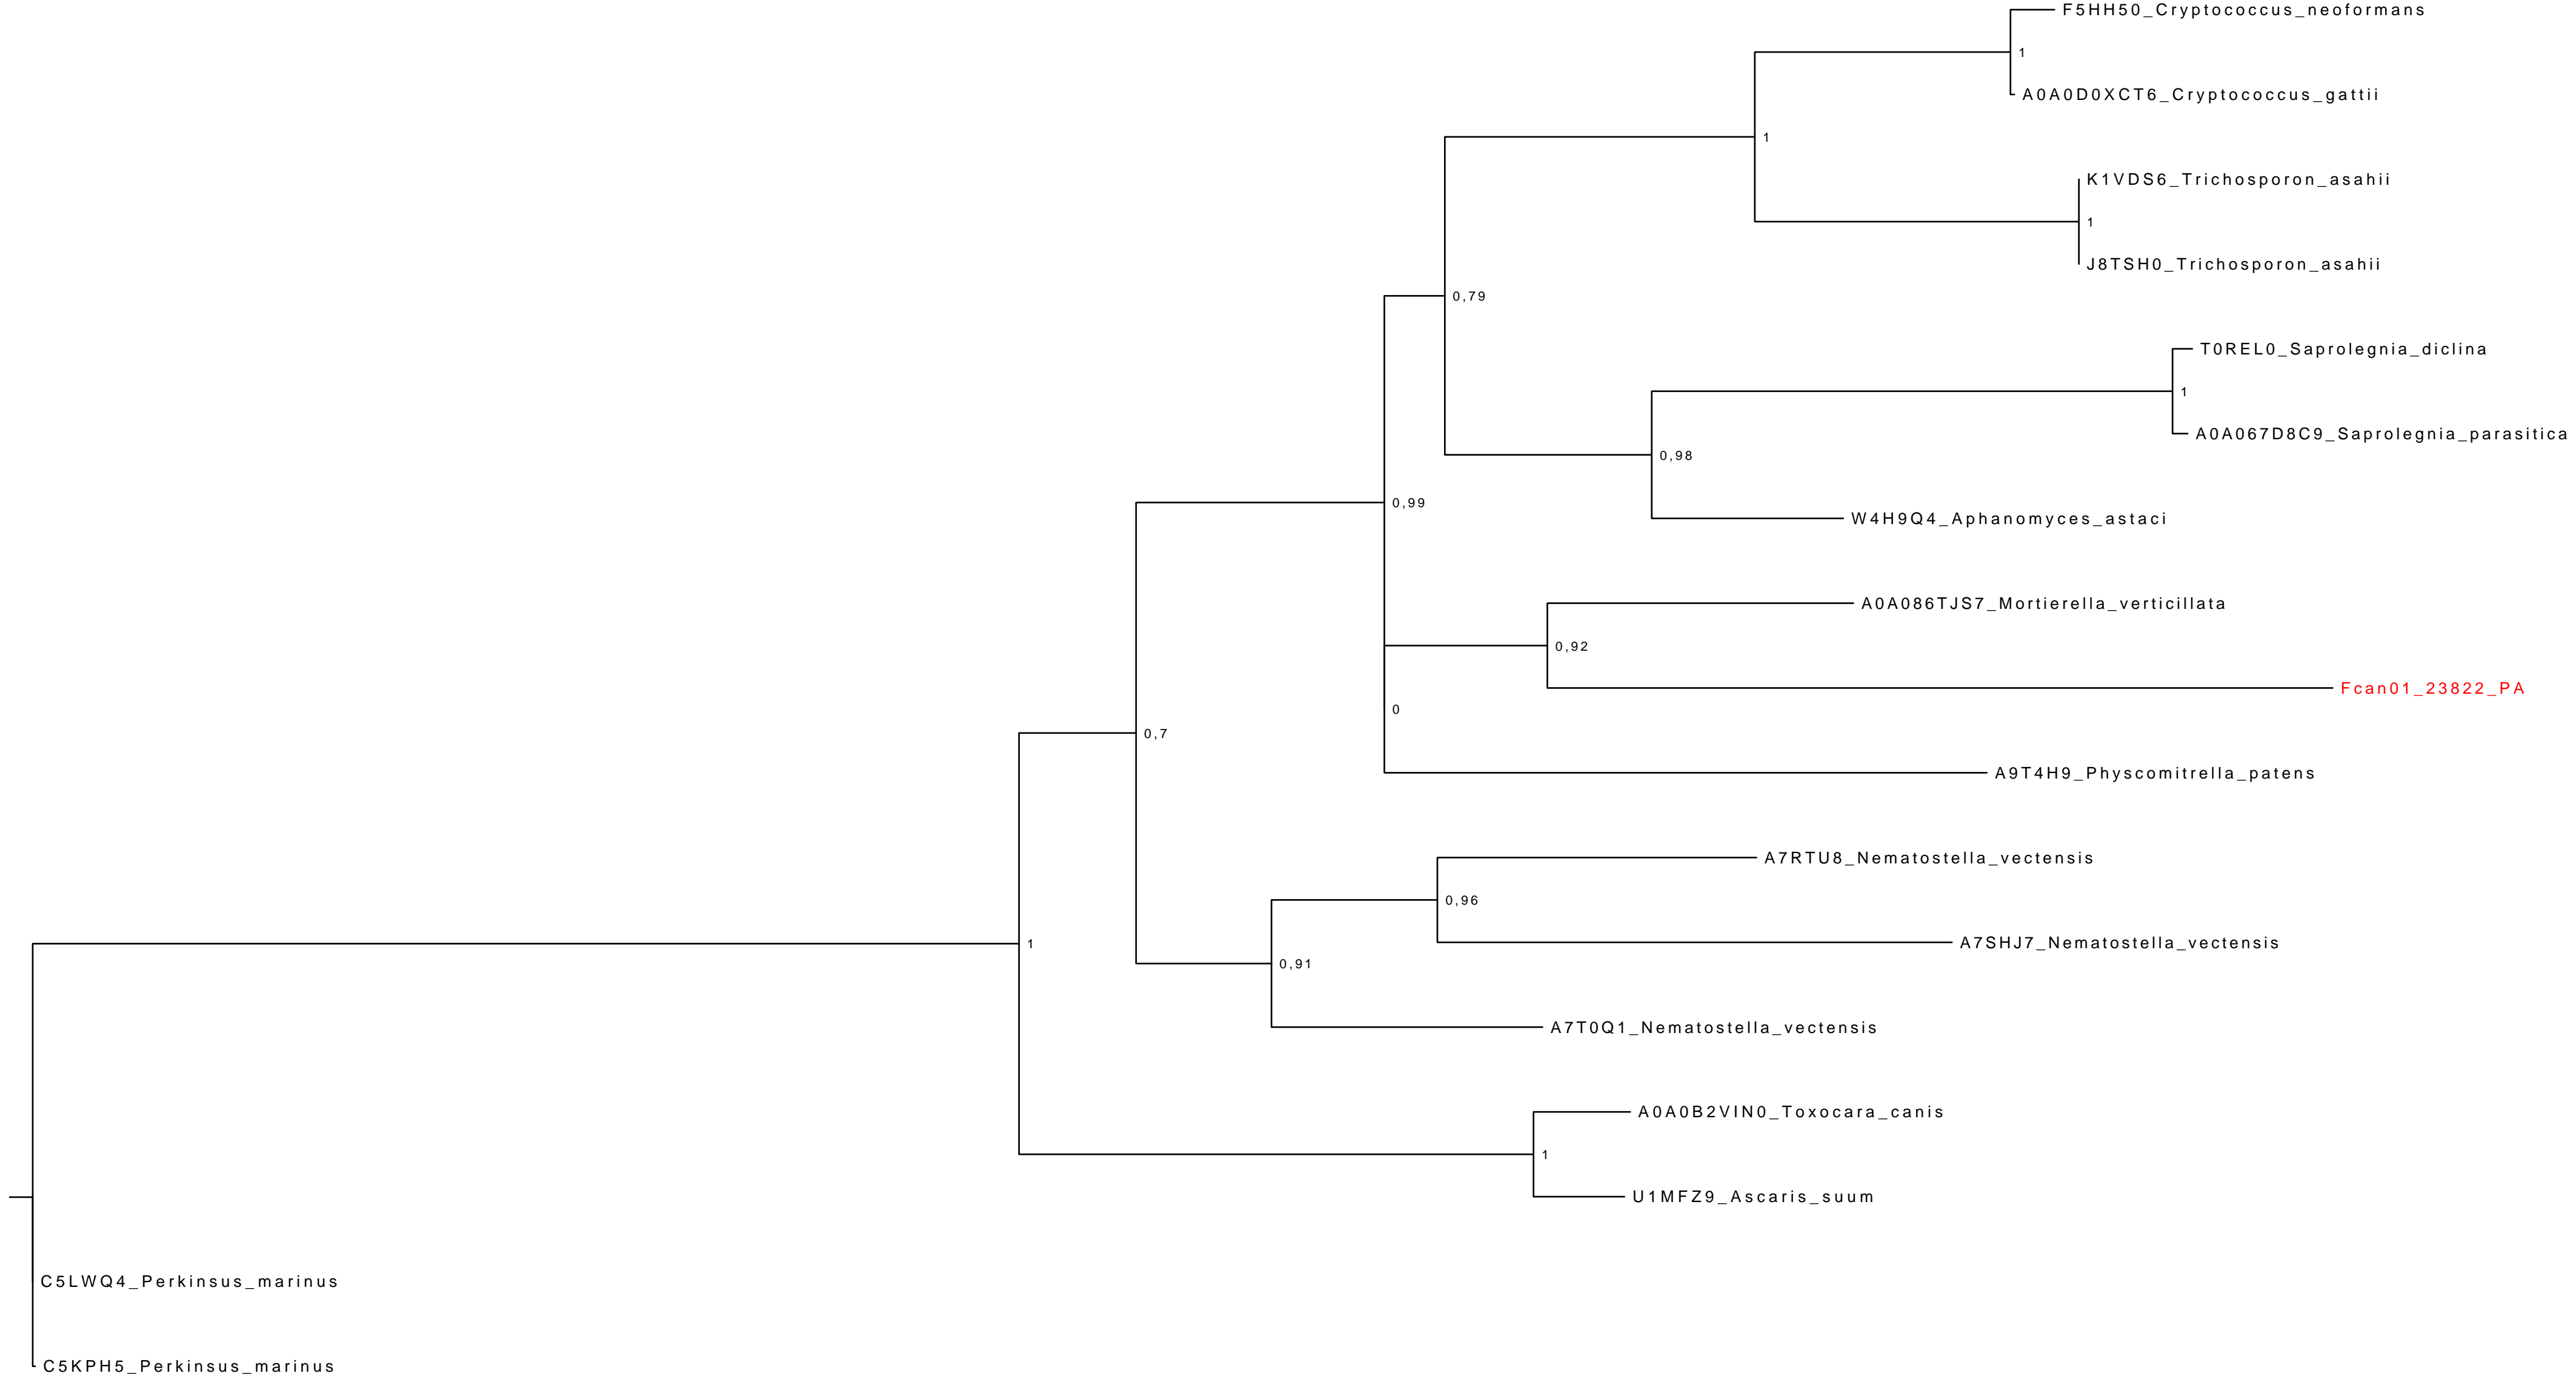



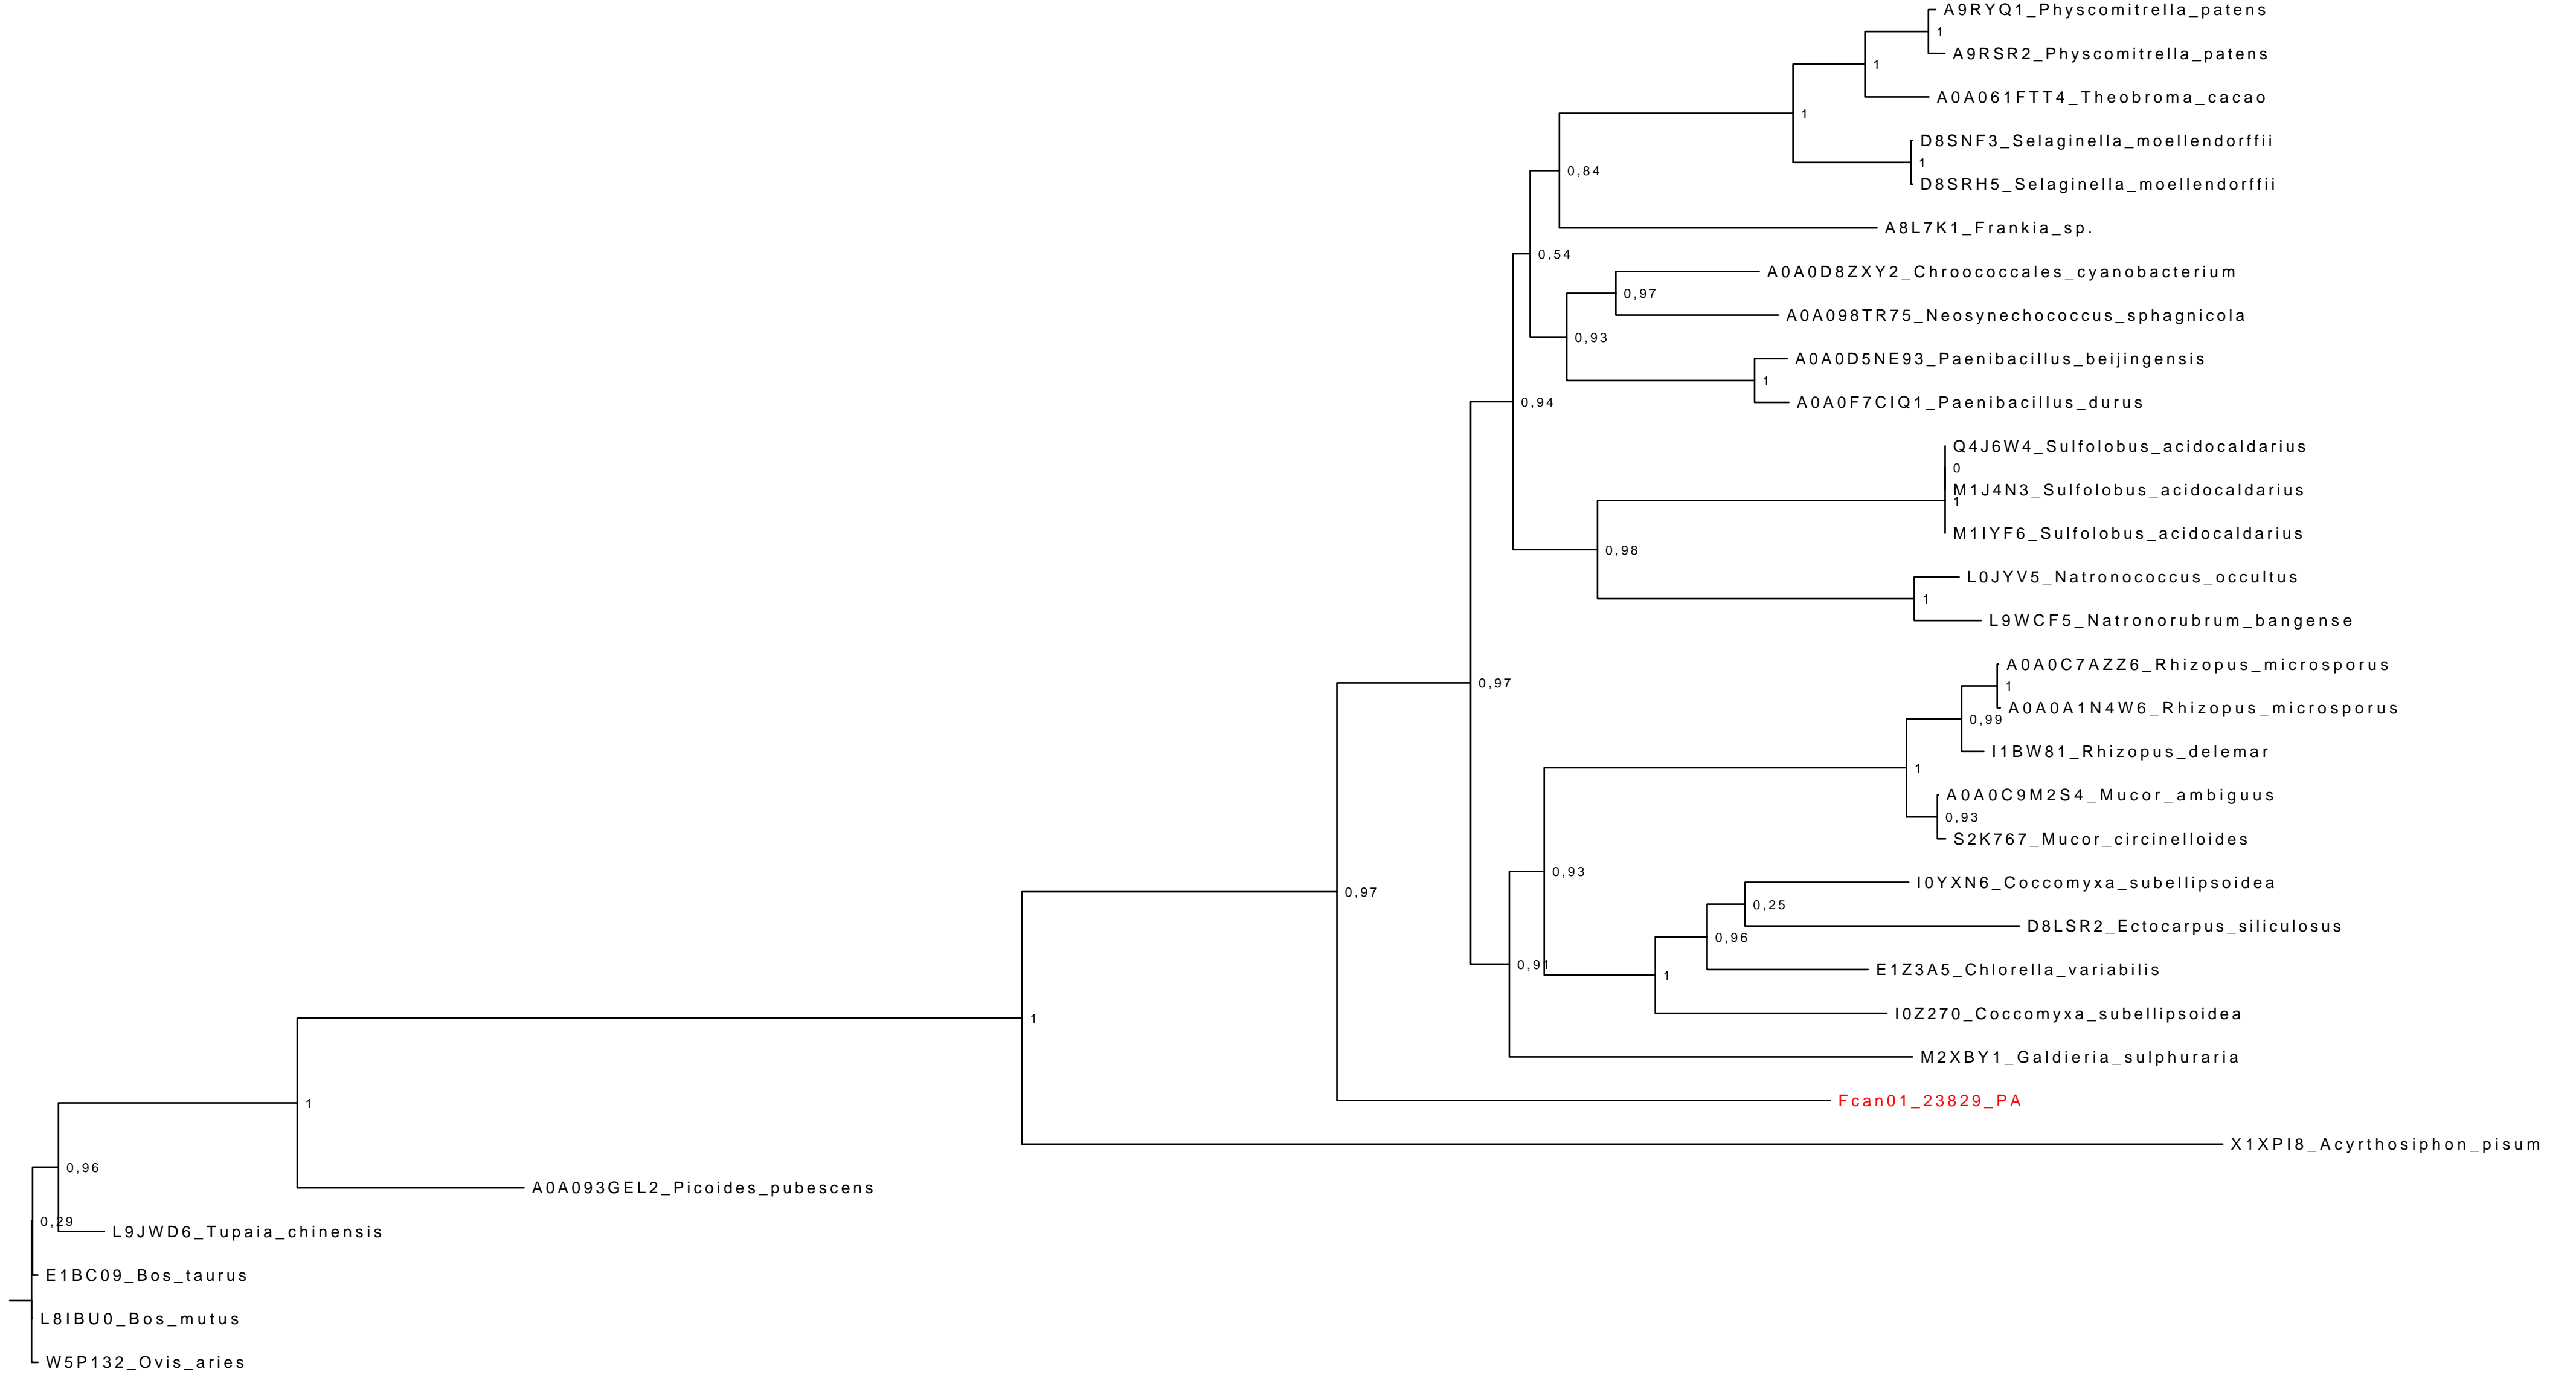

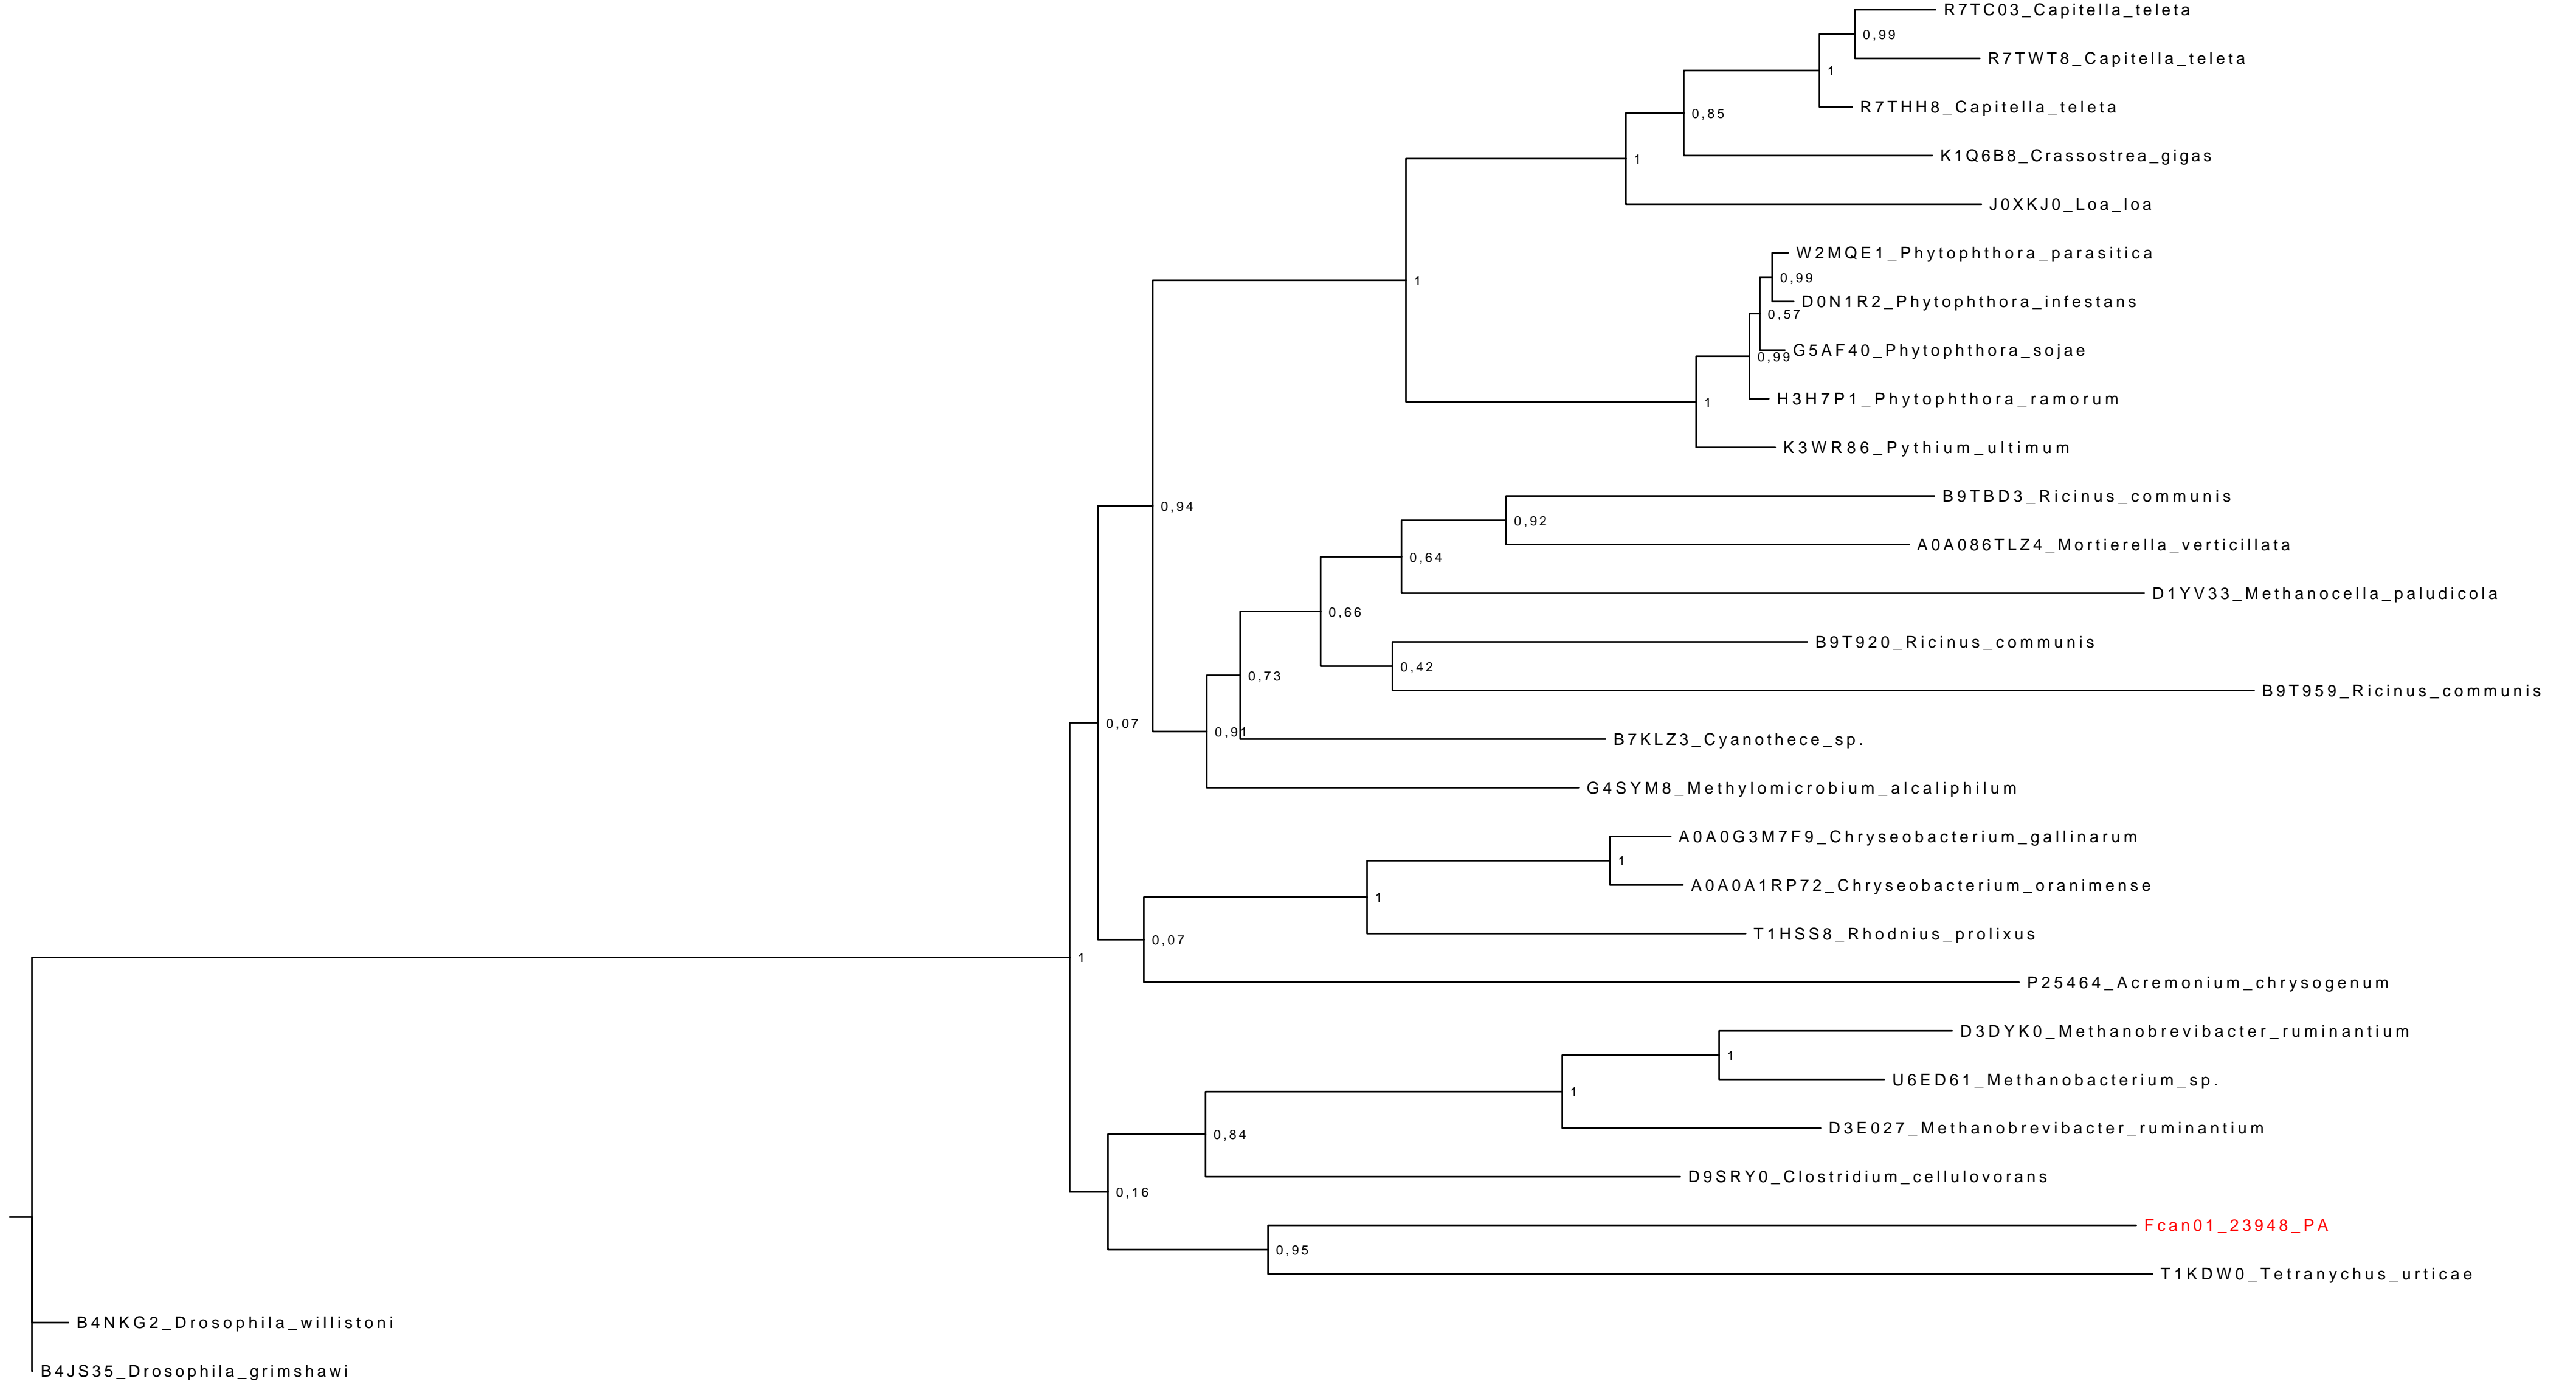

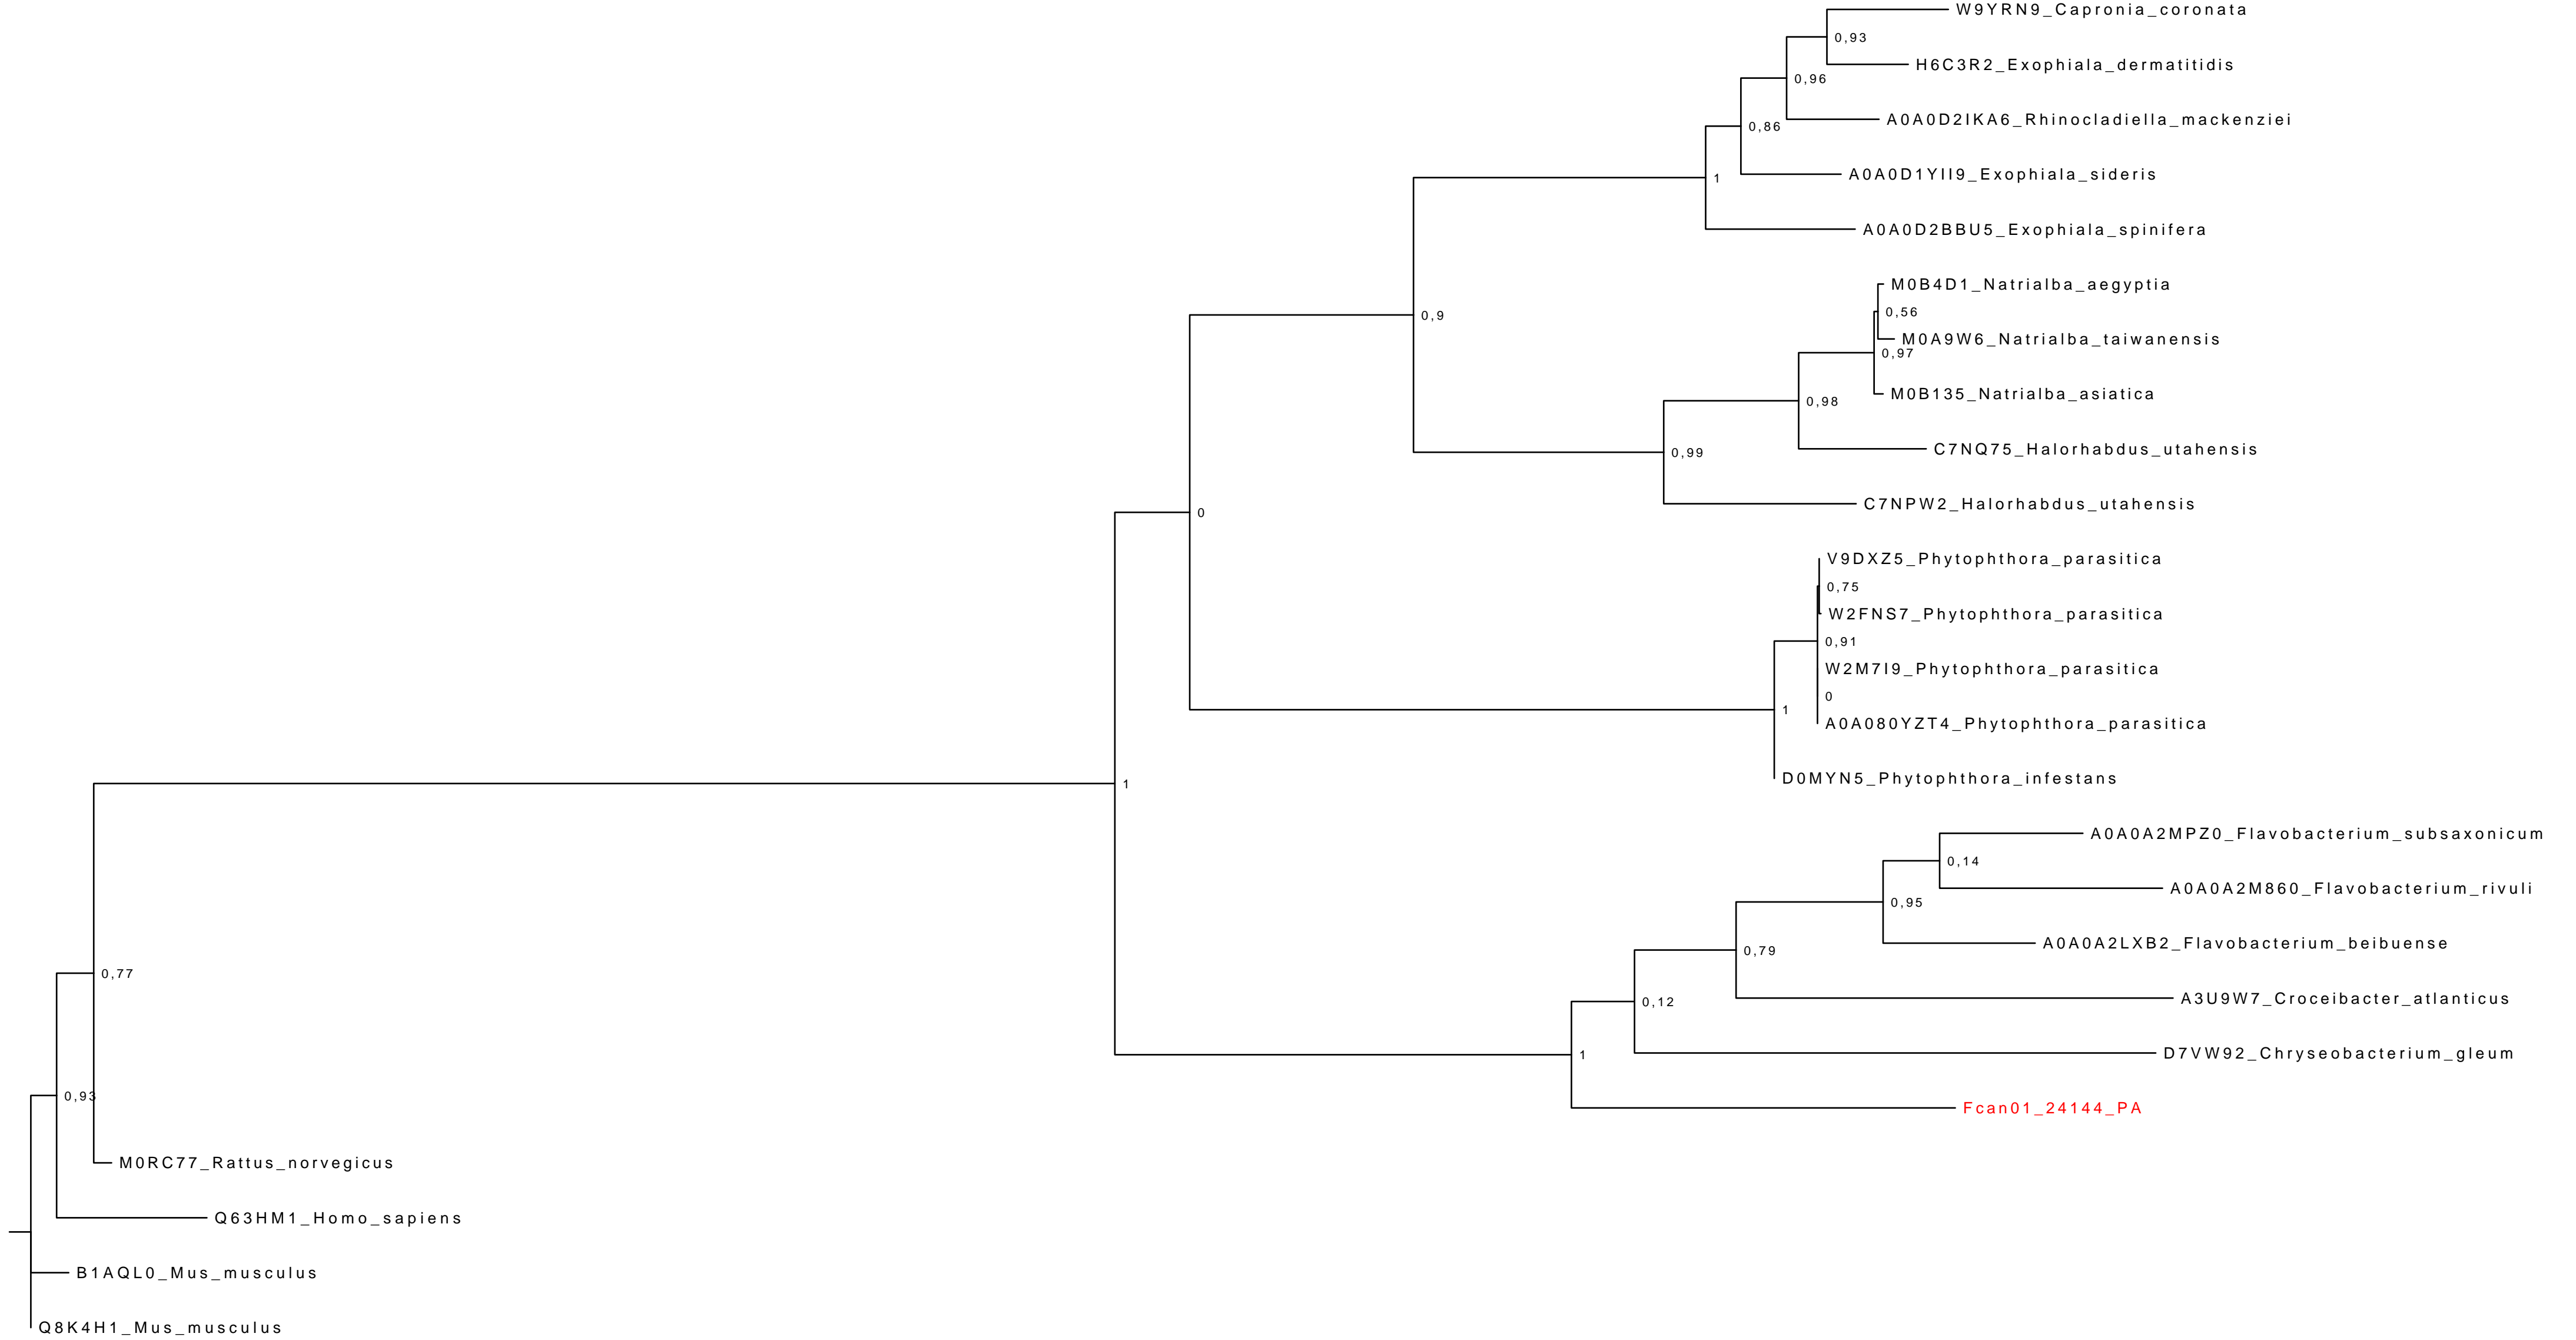

0.5

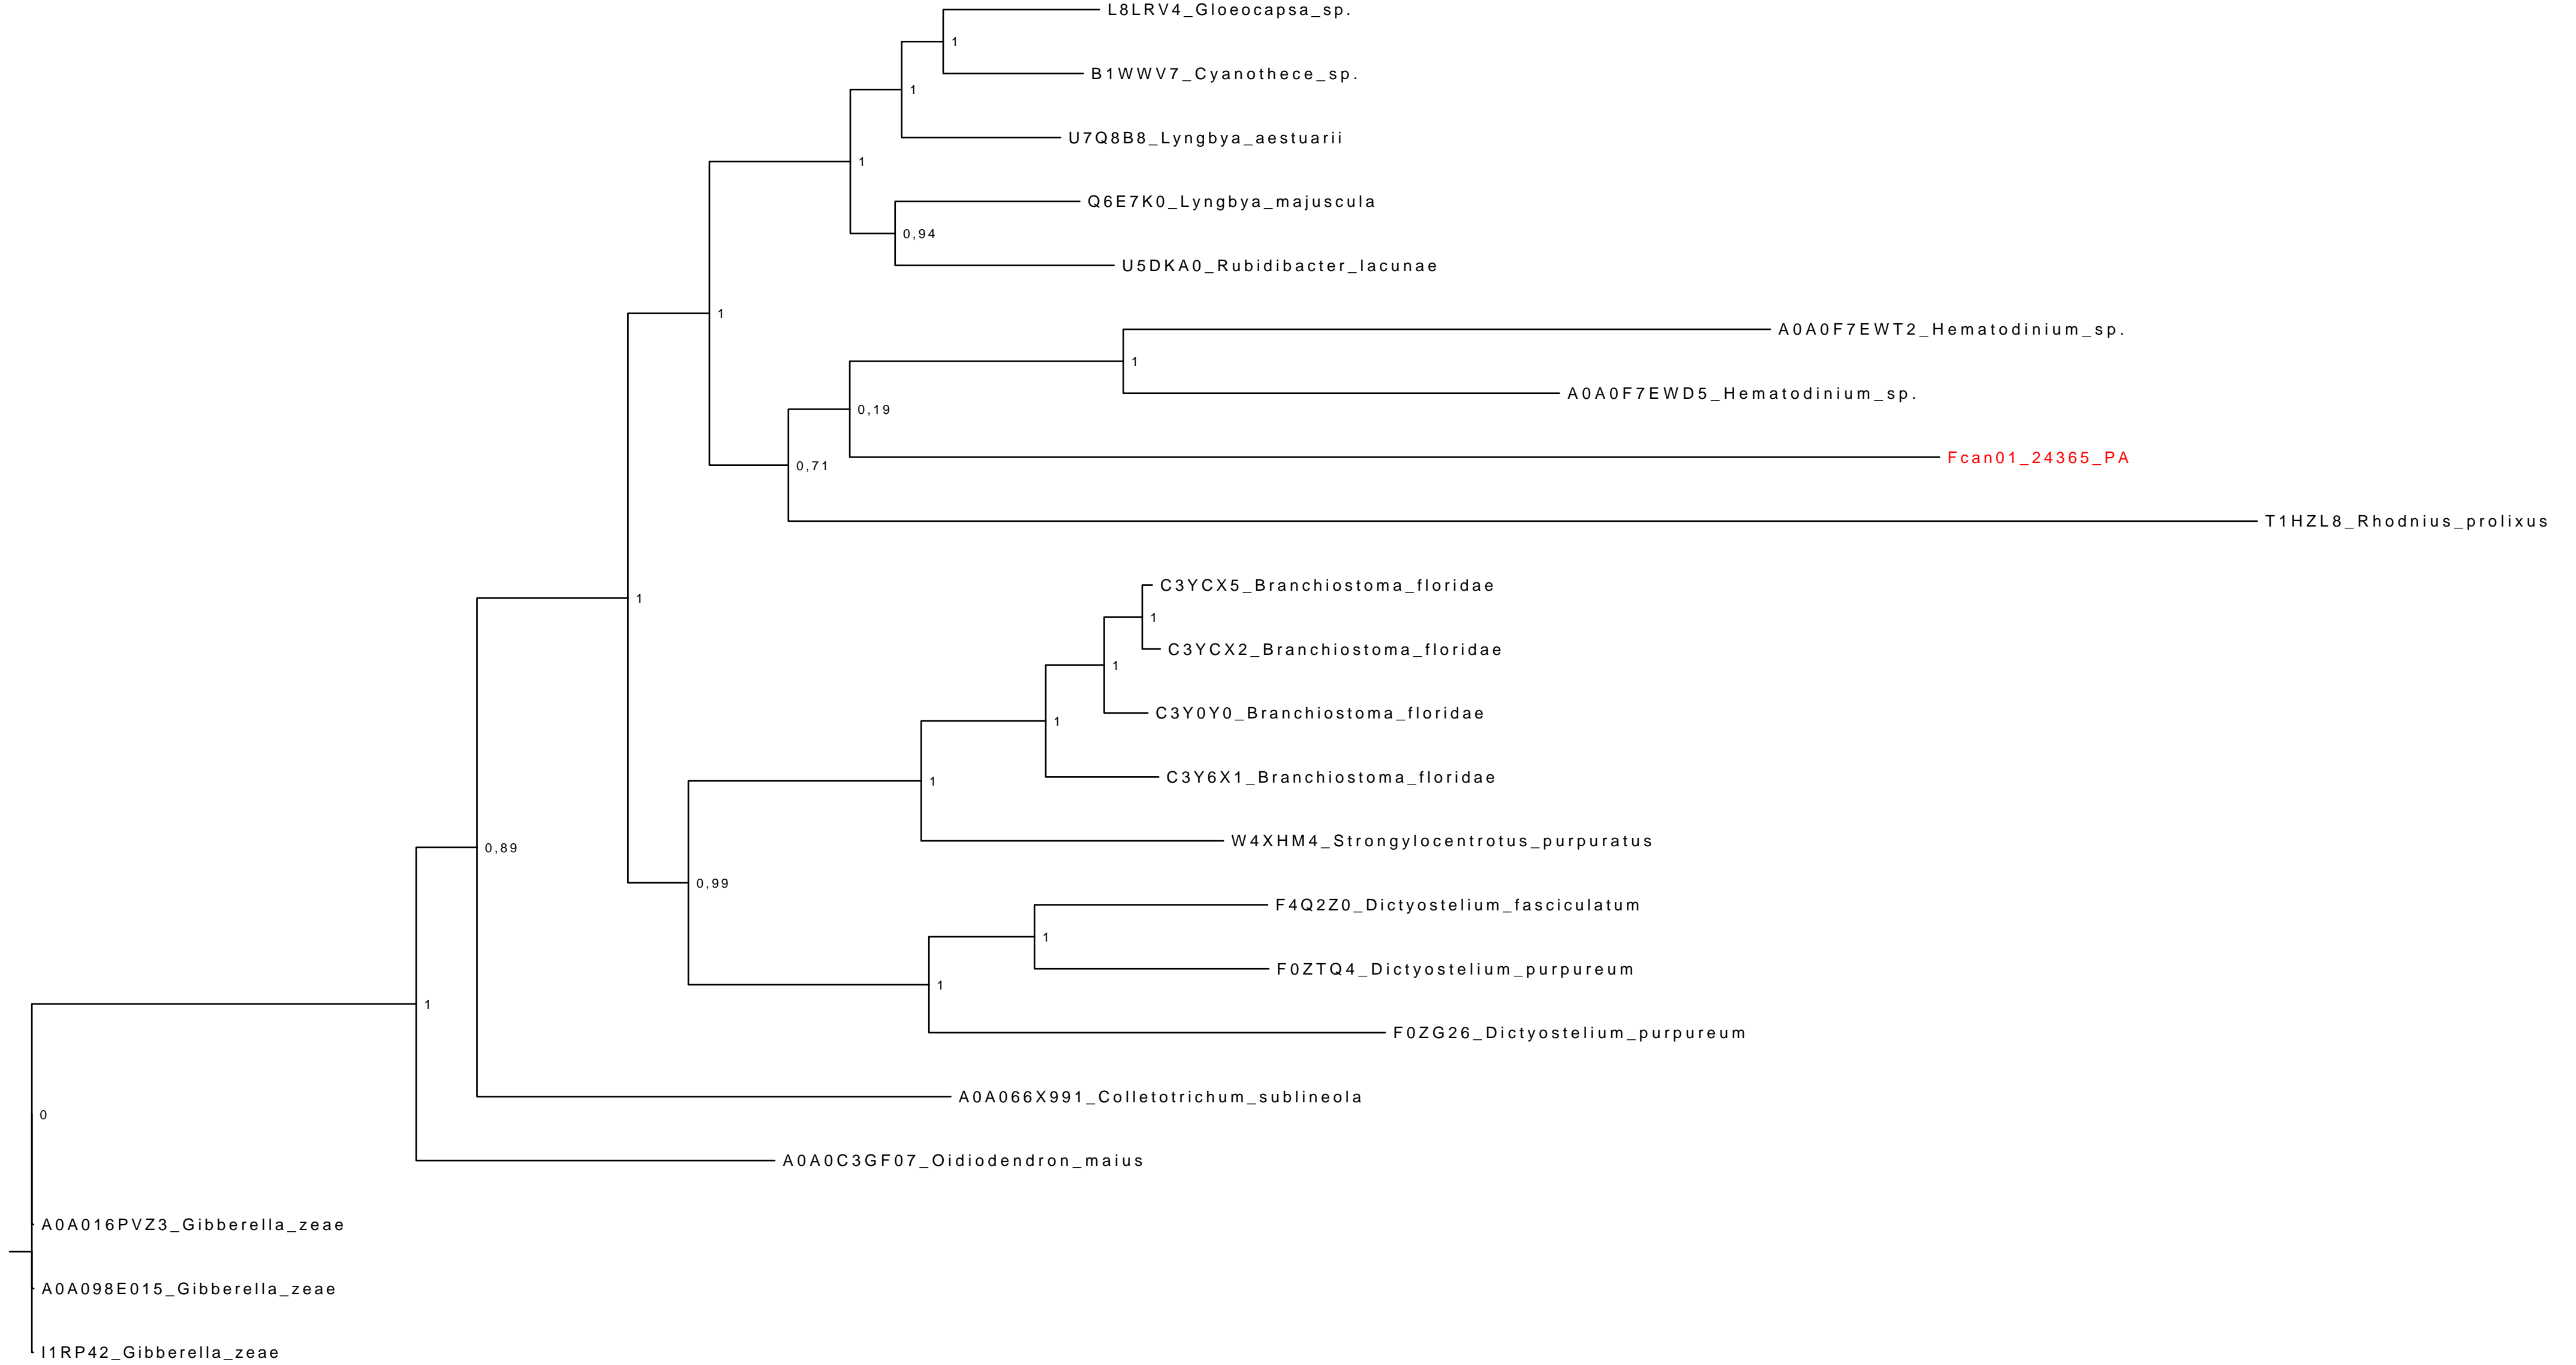

0.6

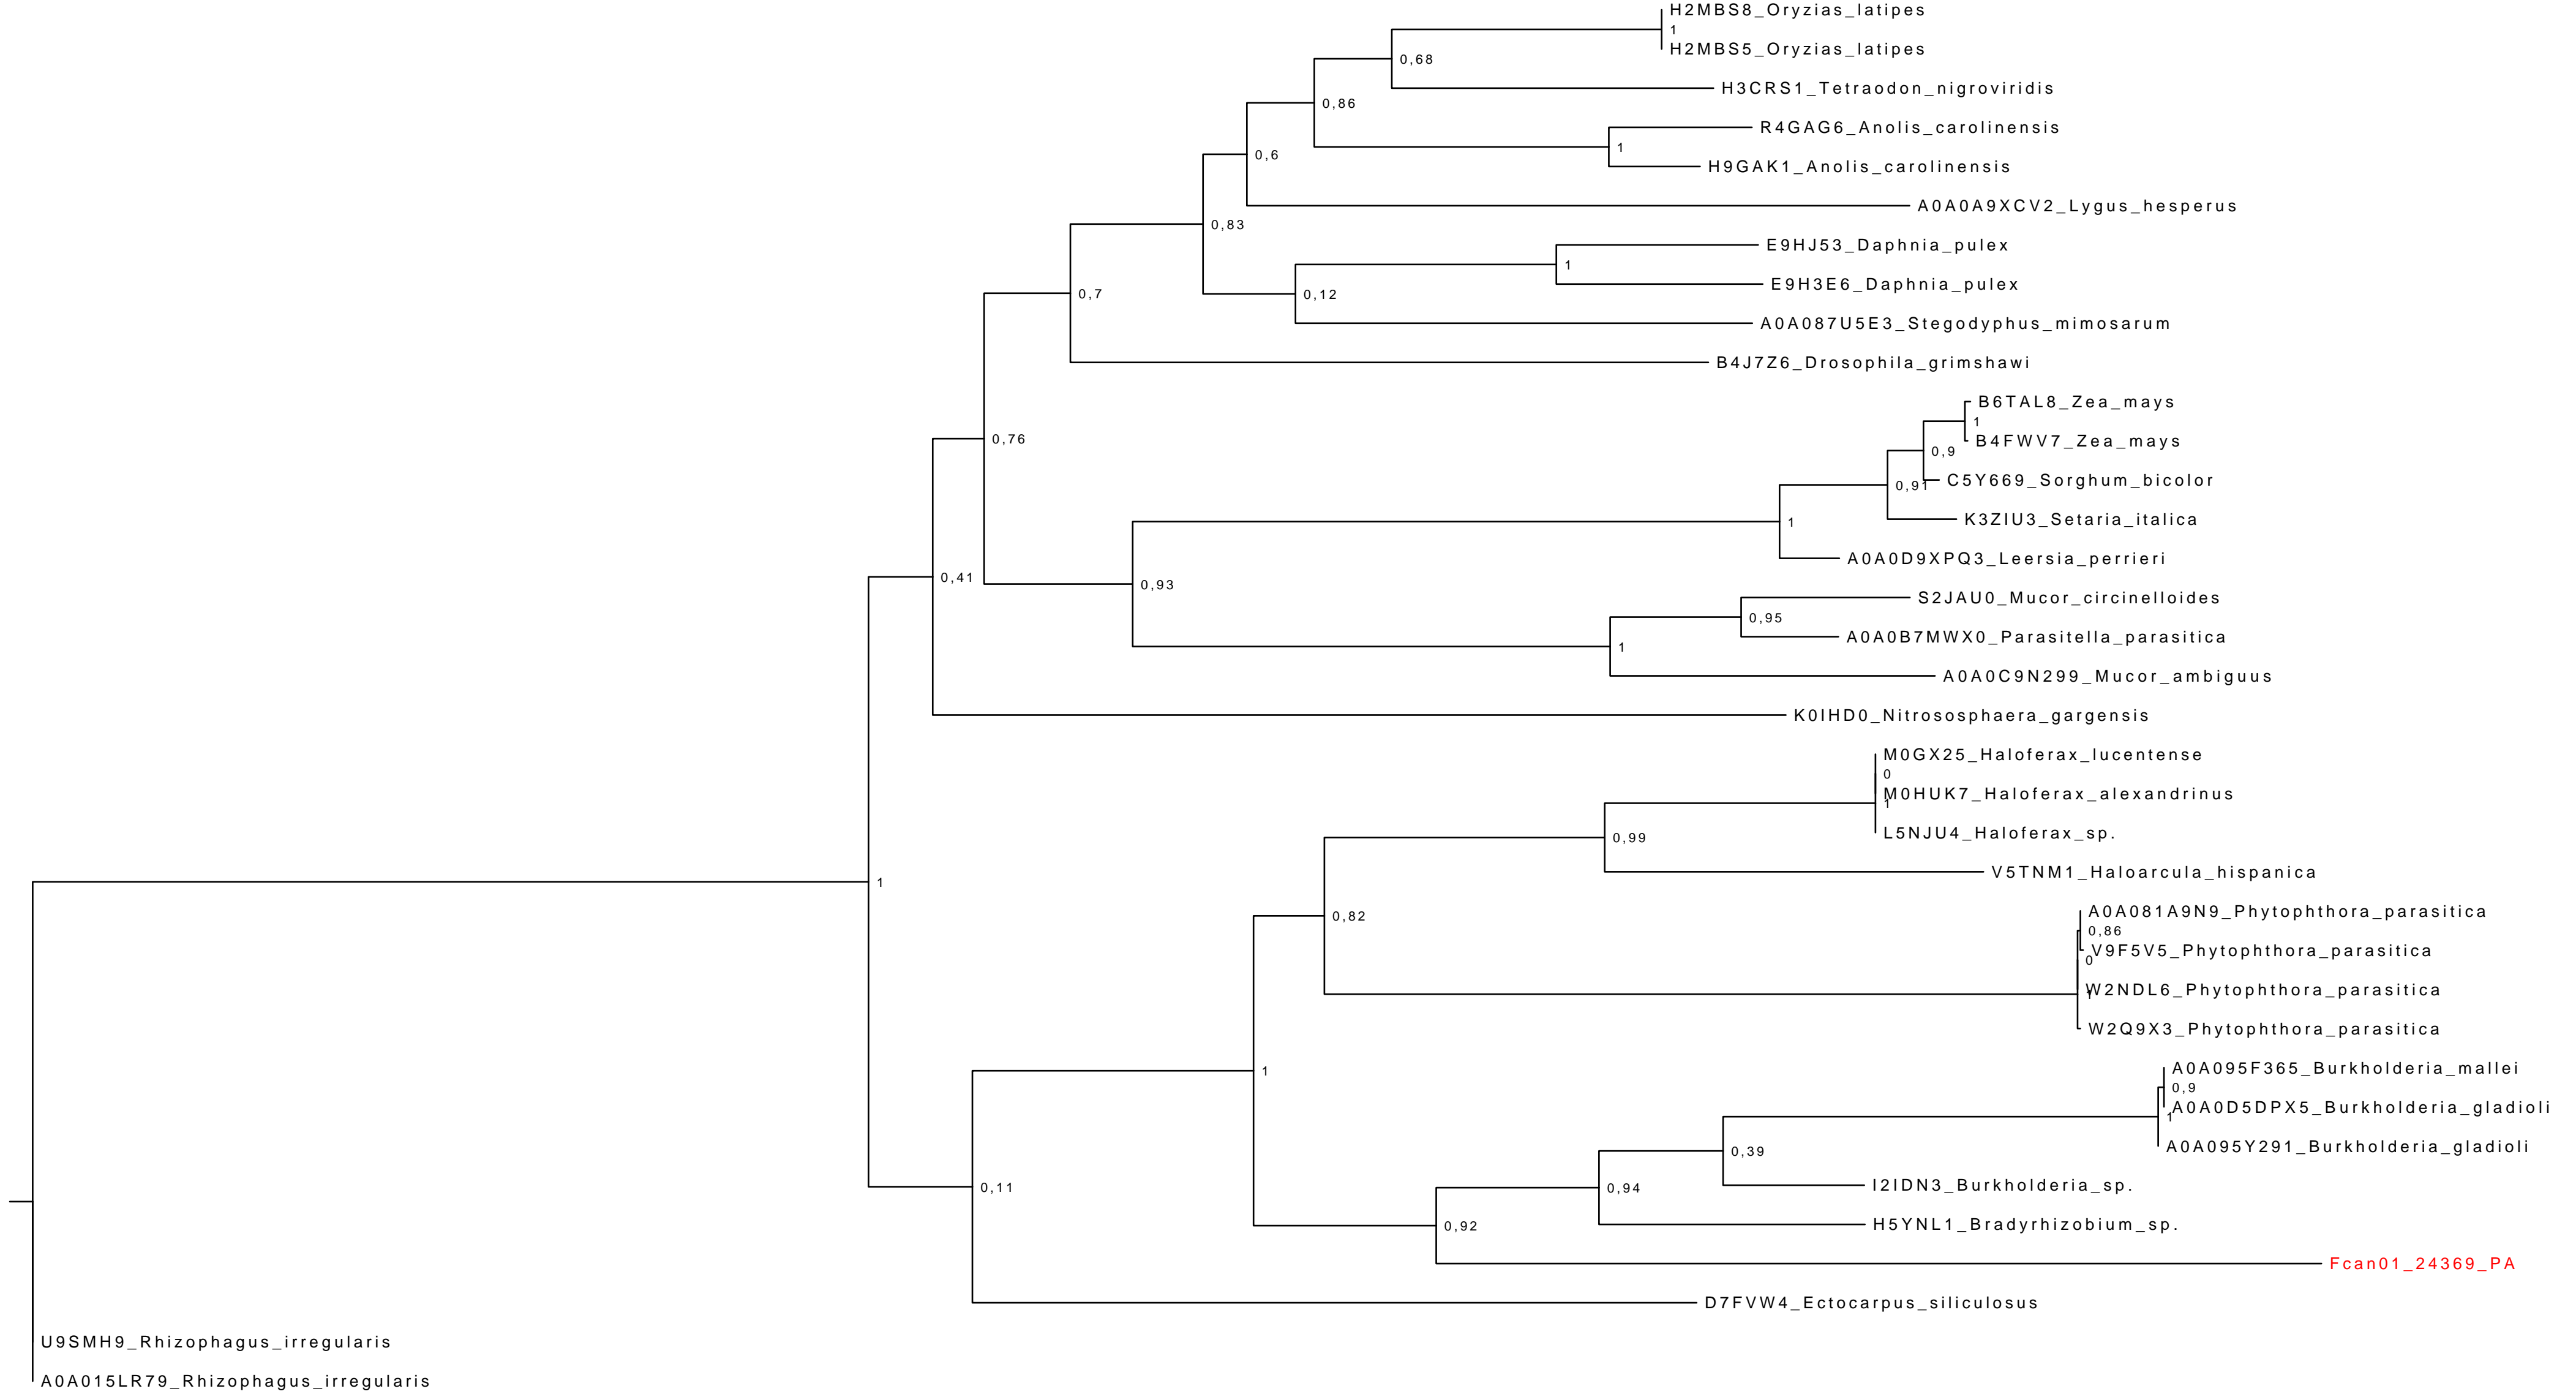

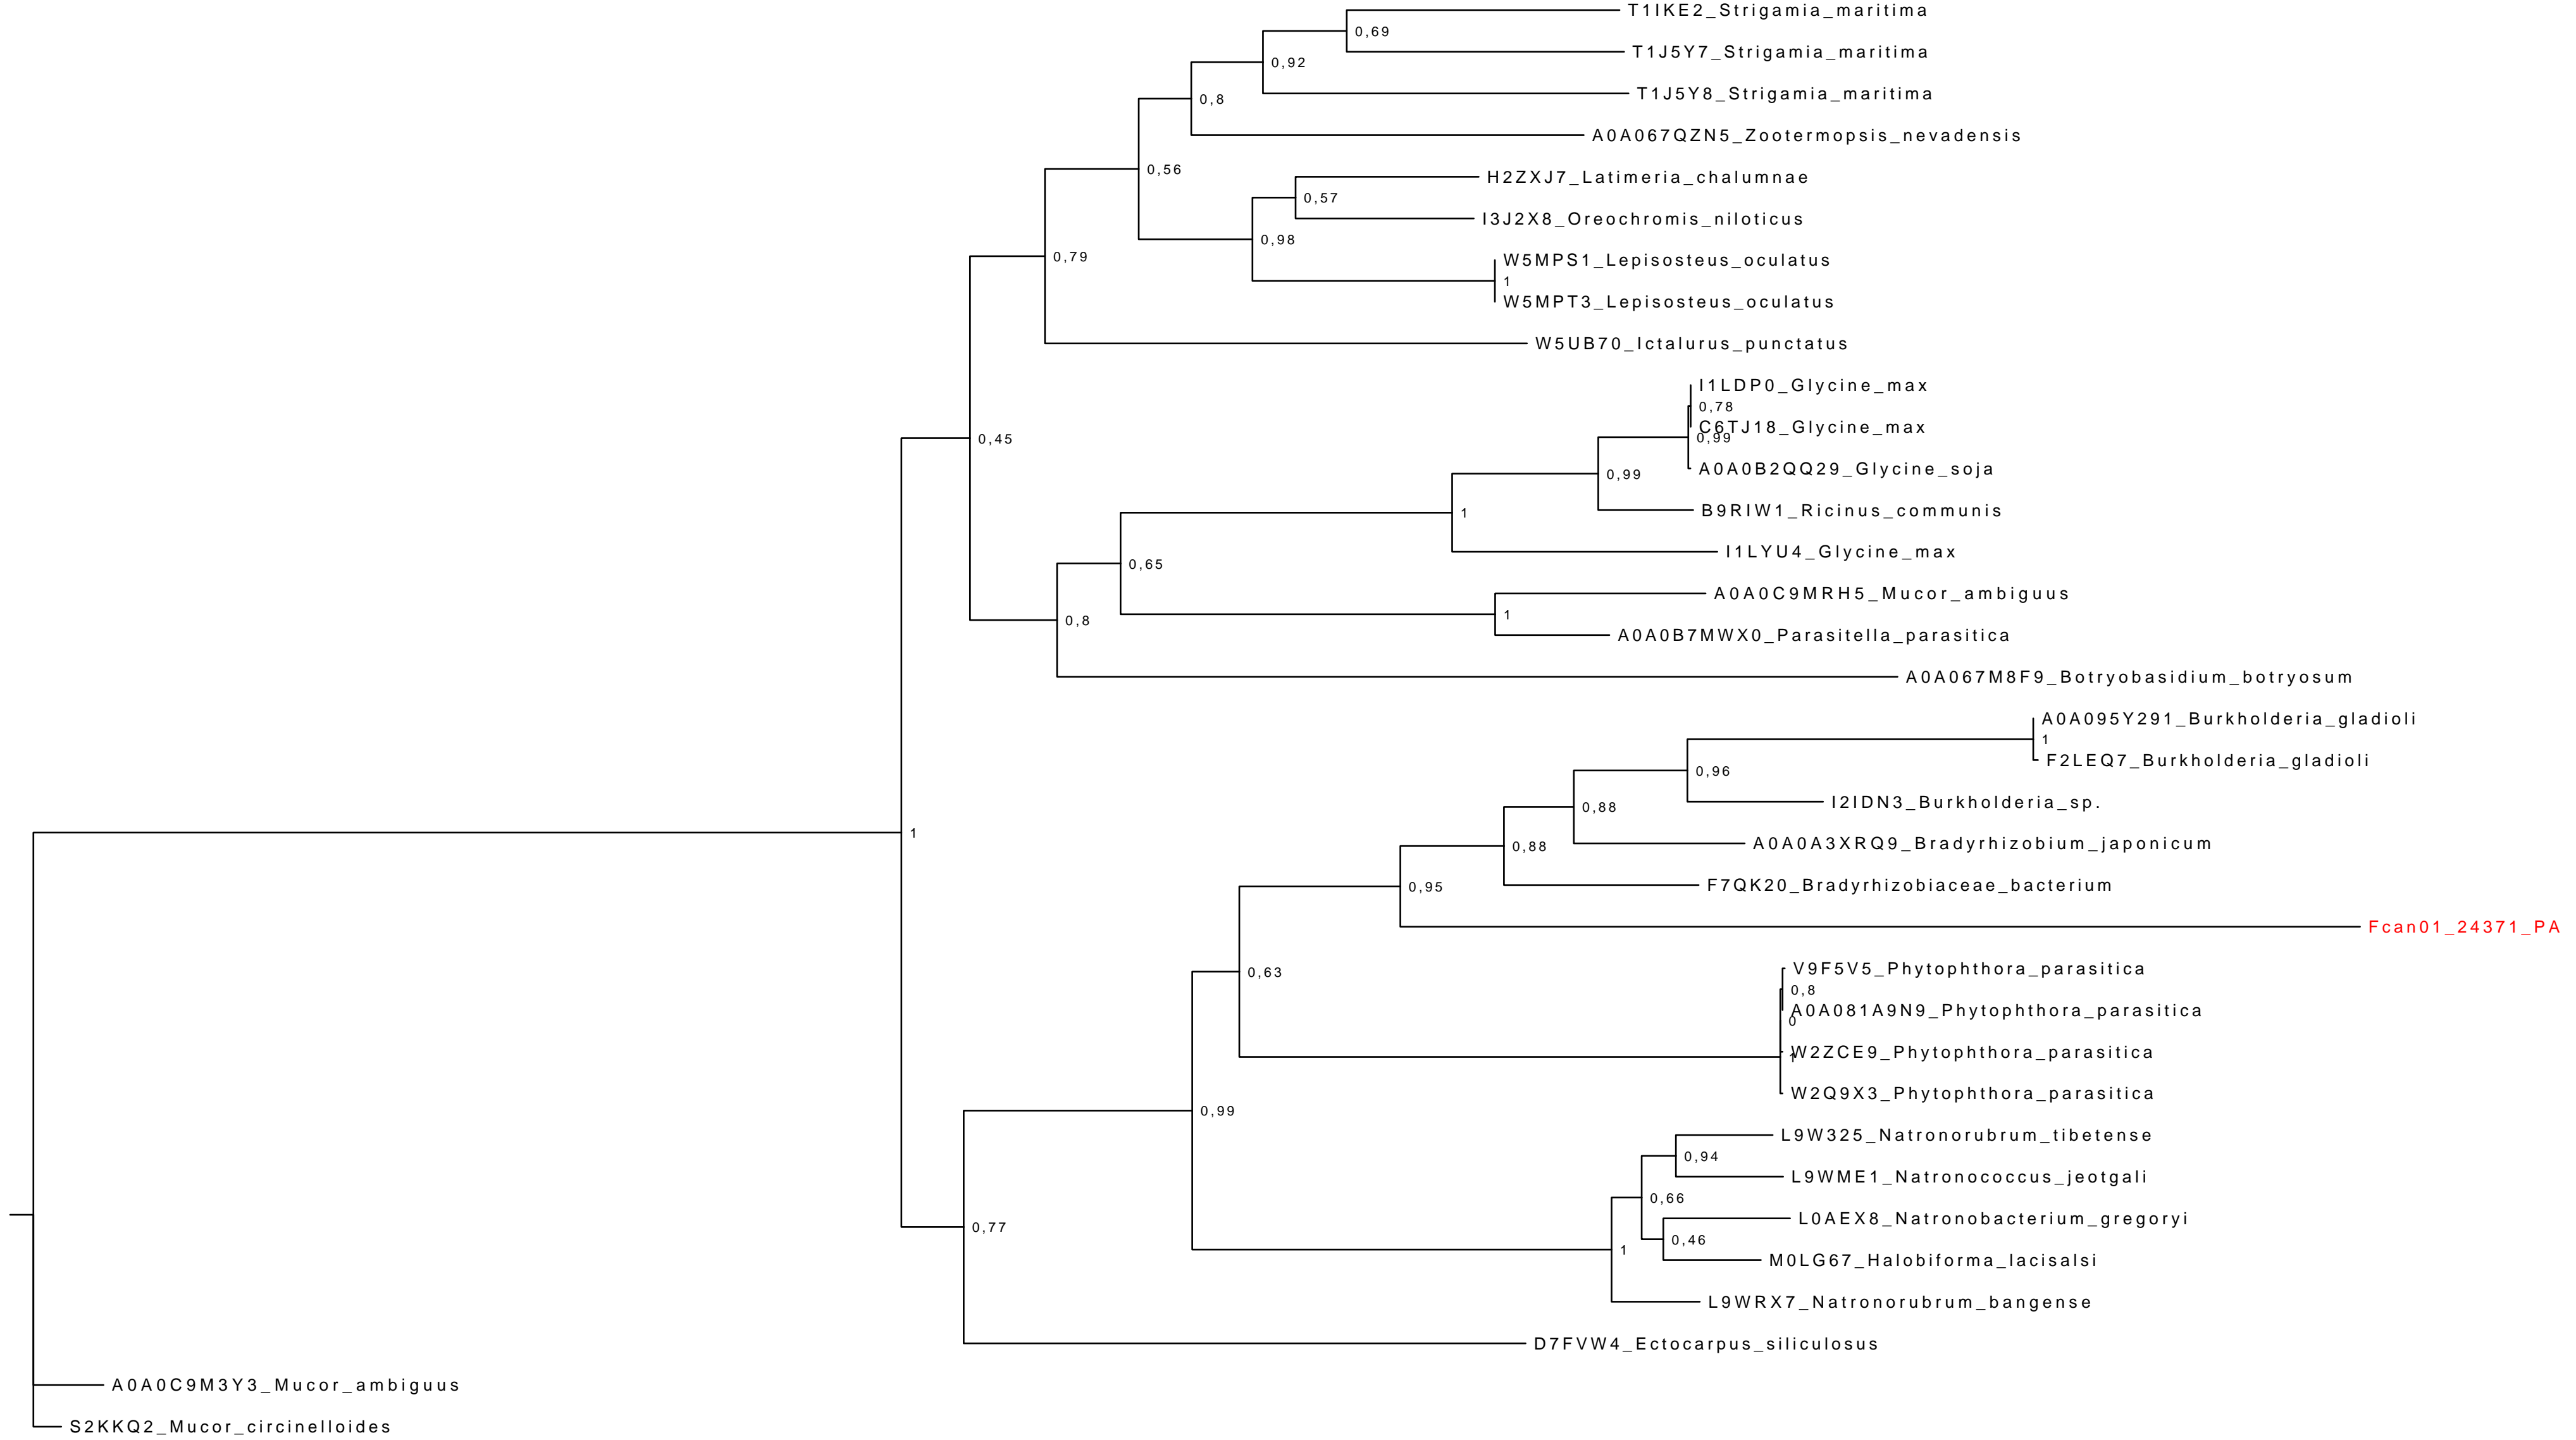

0.4

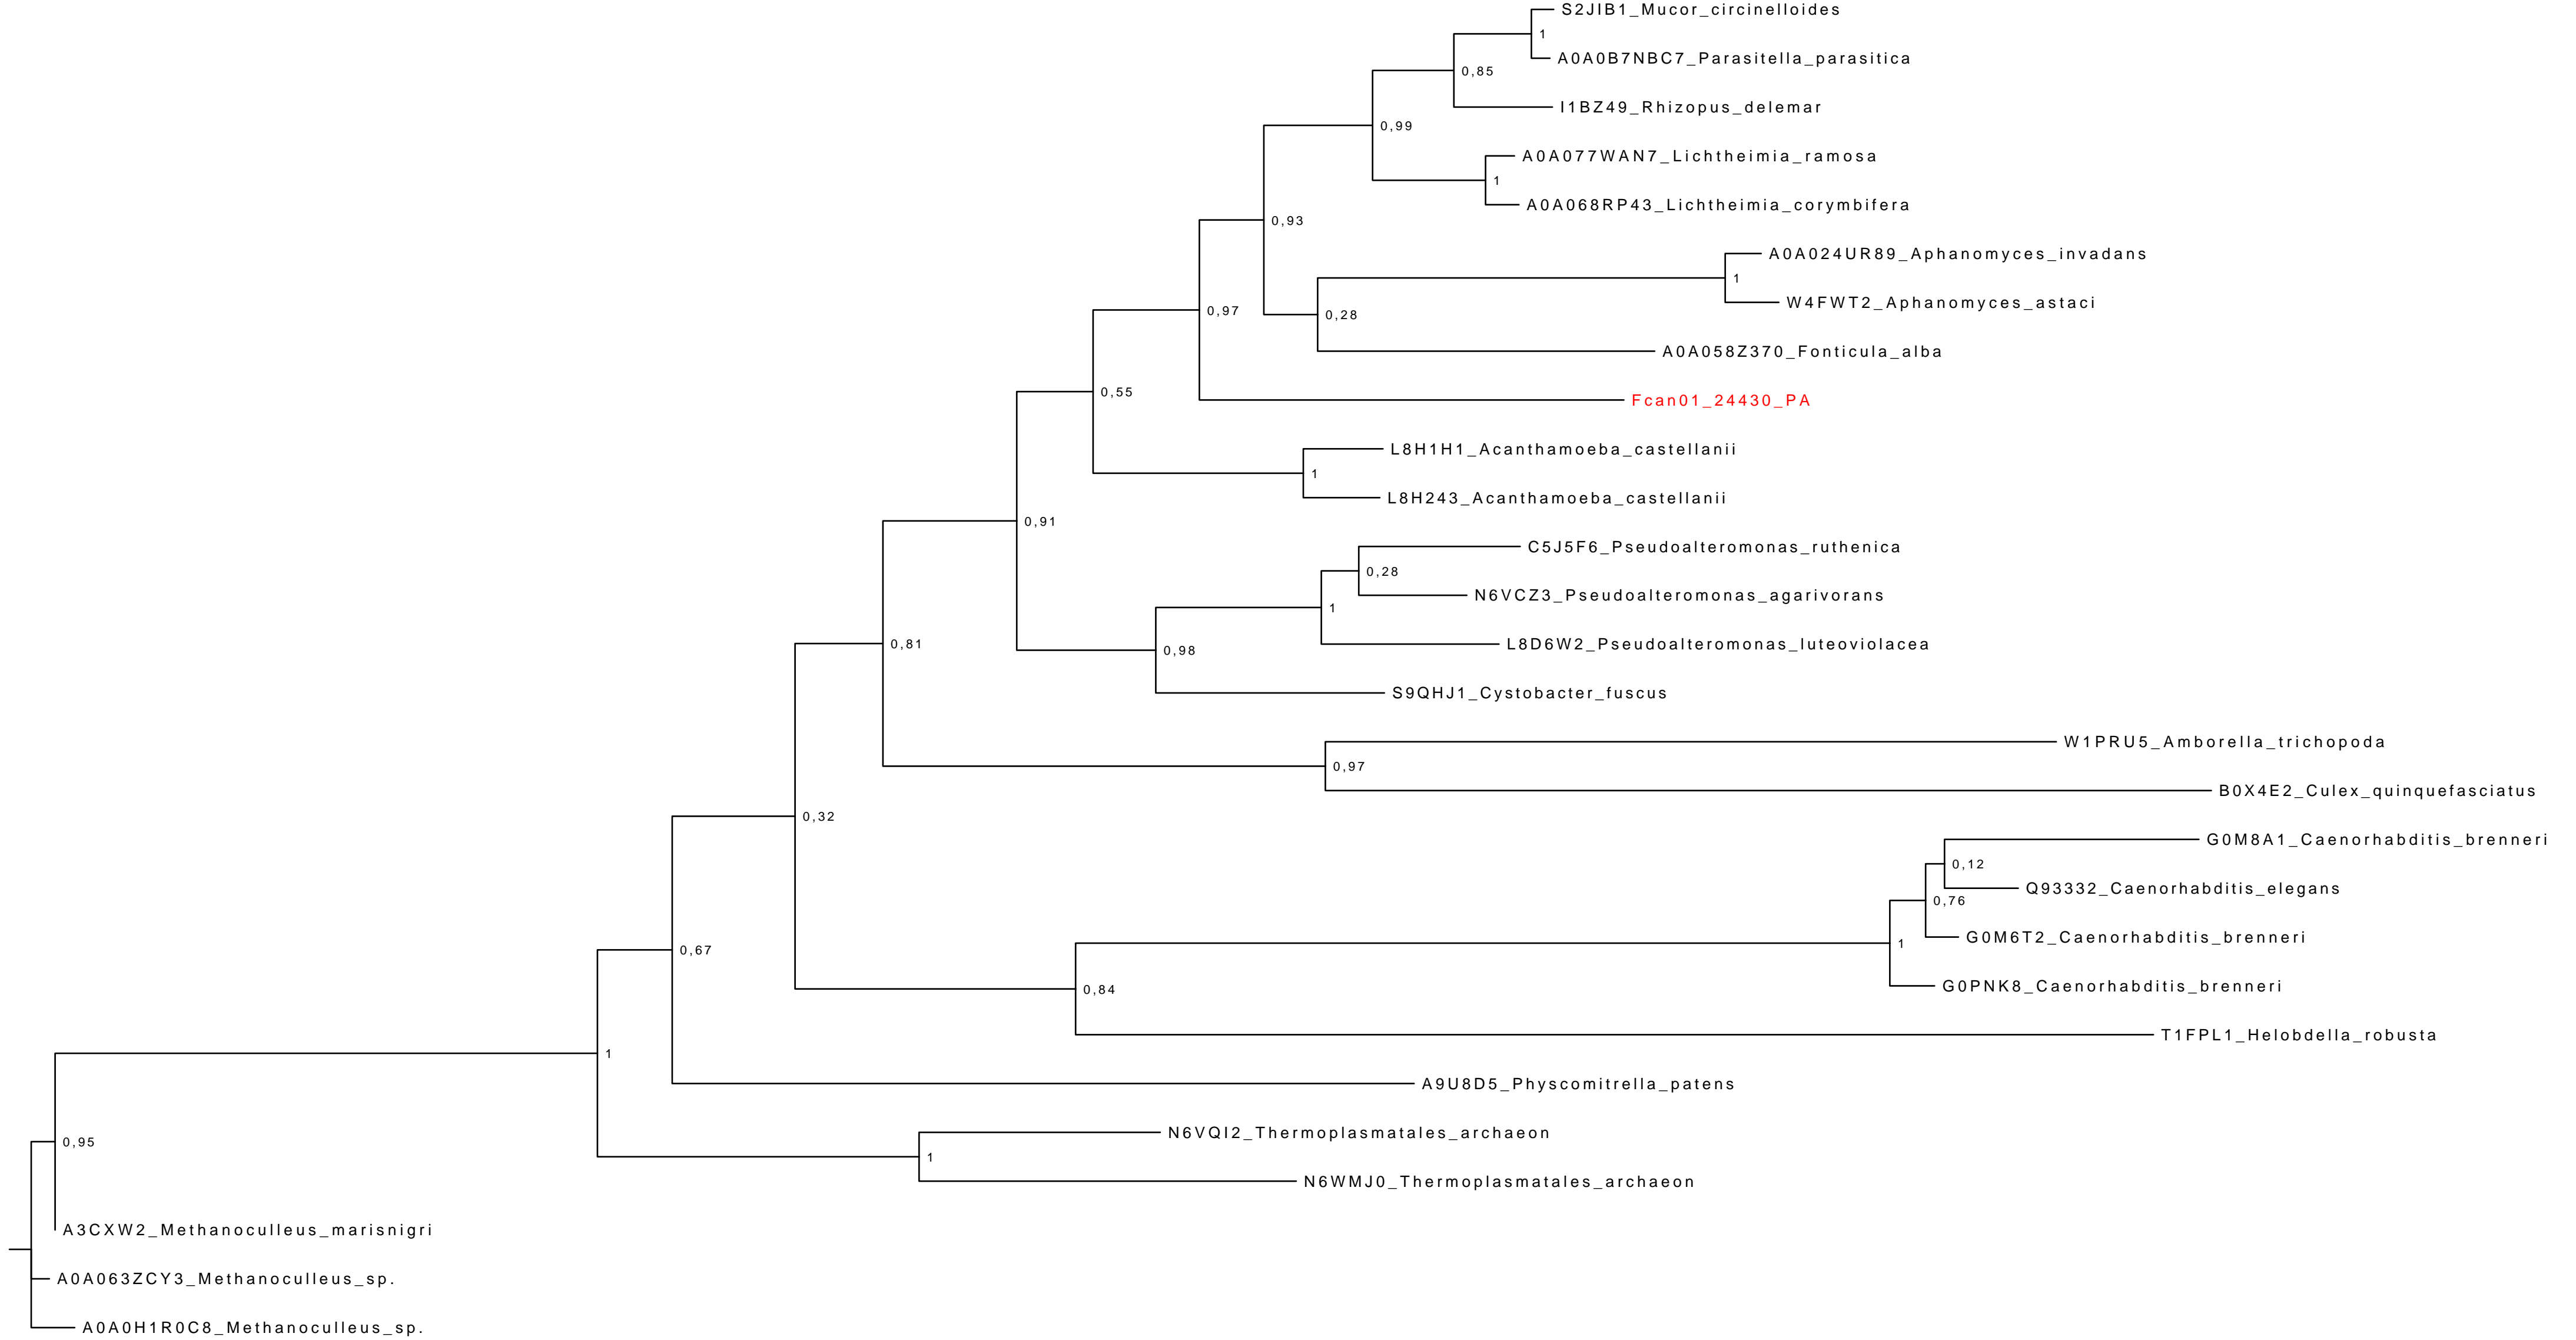

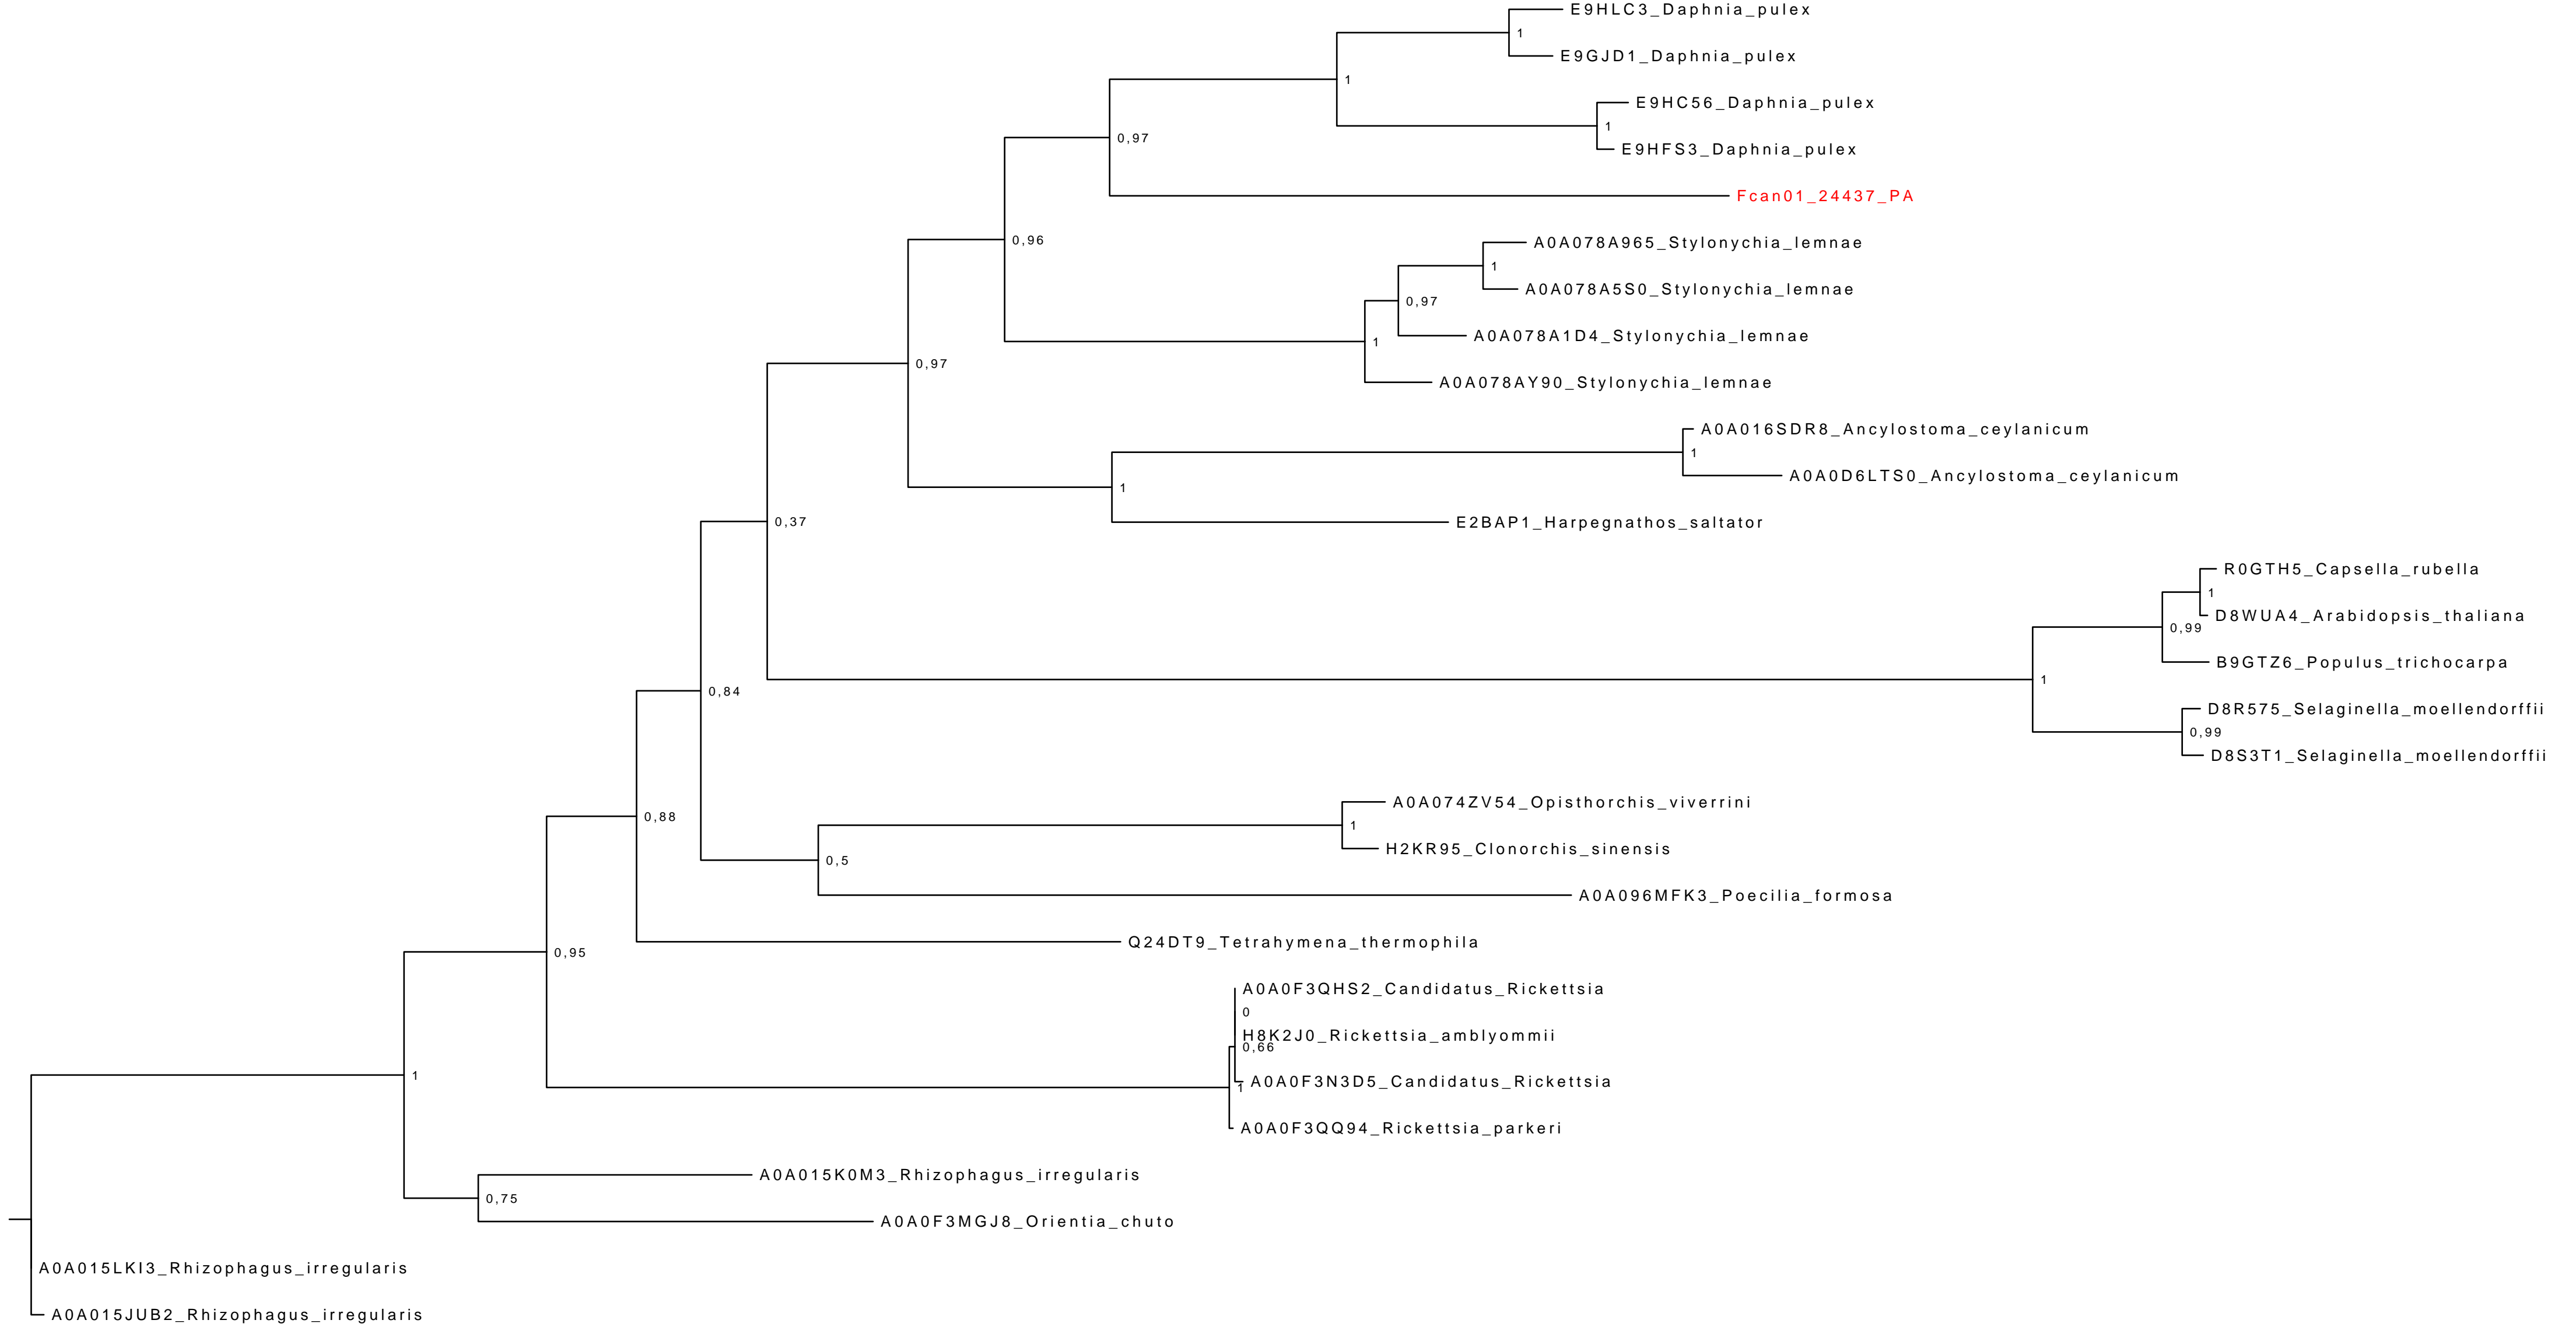

0.5



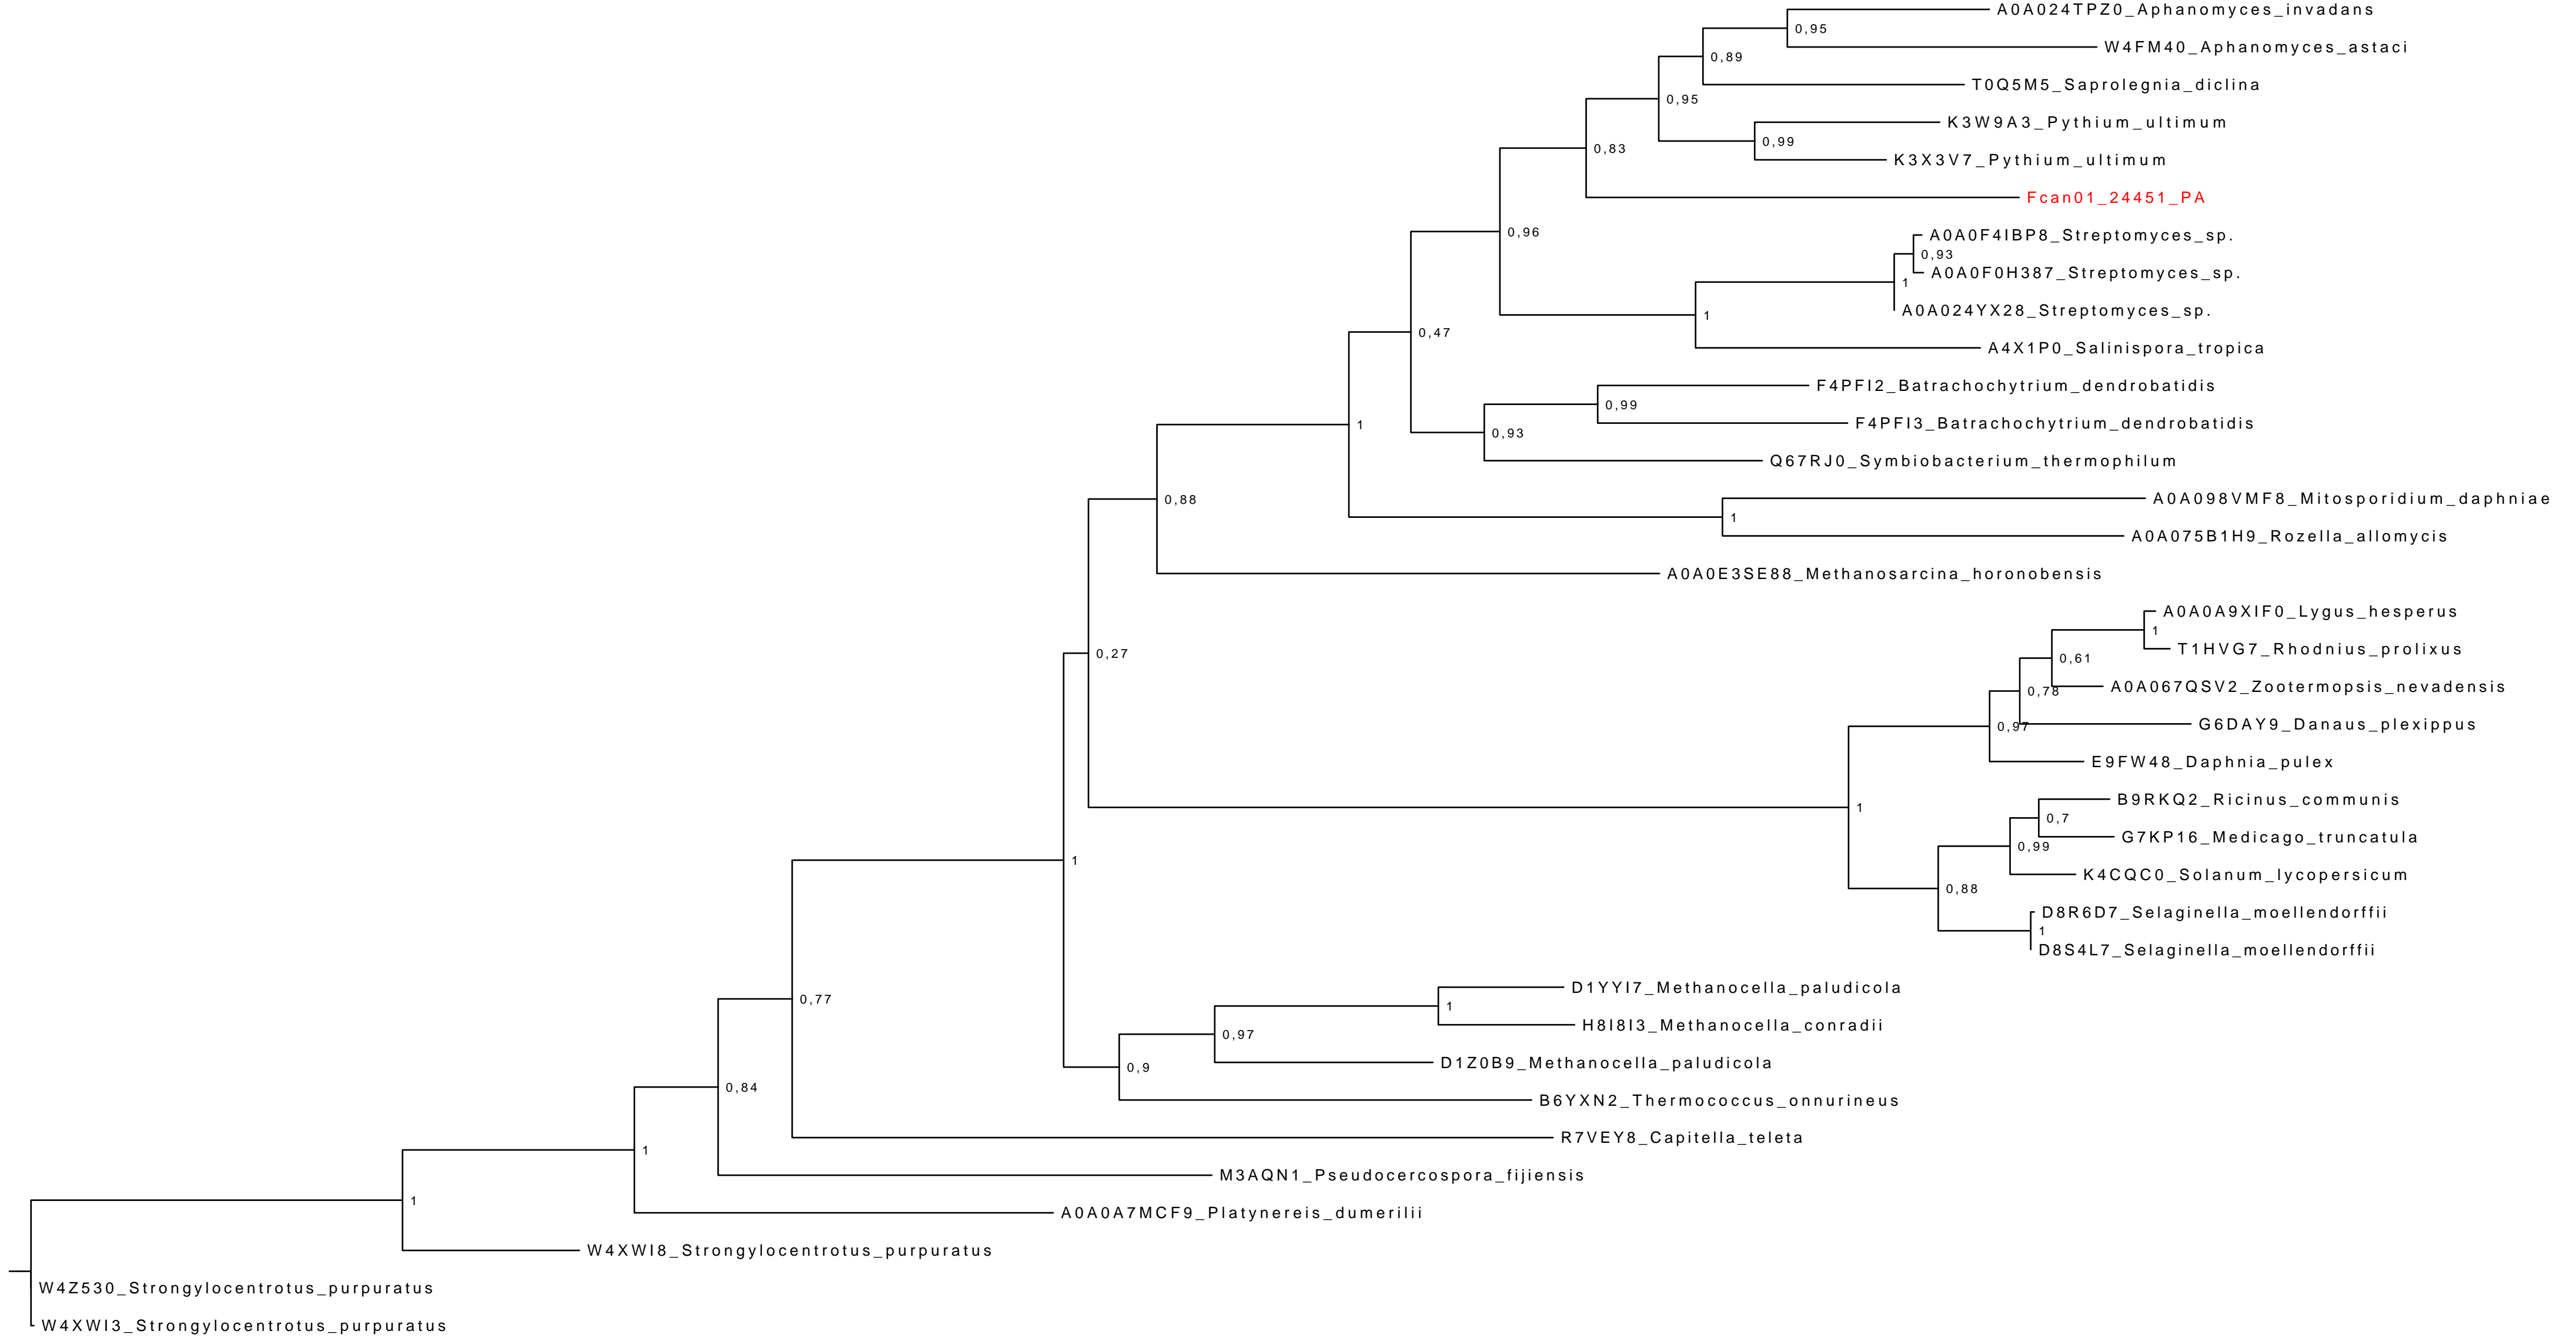

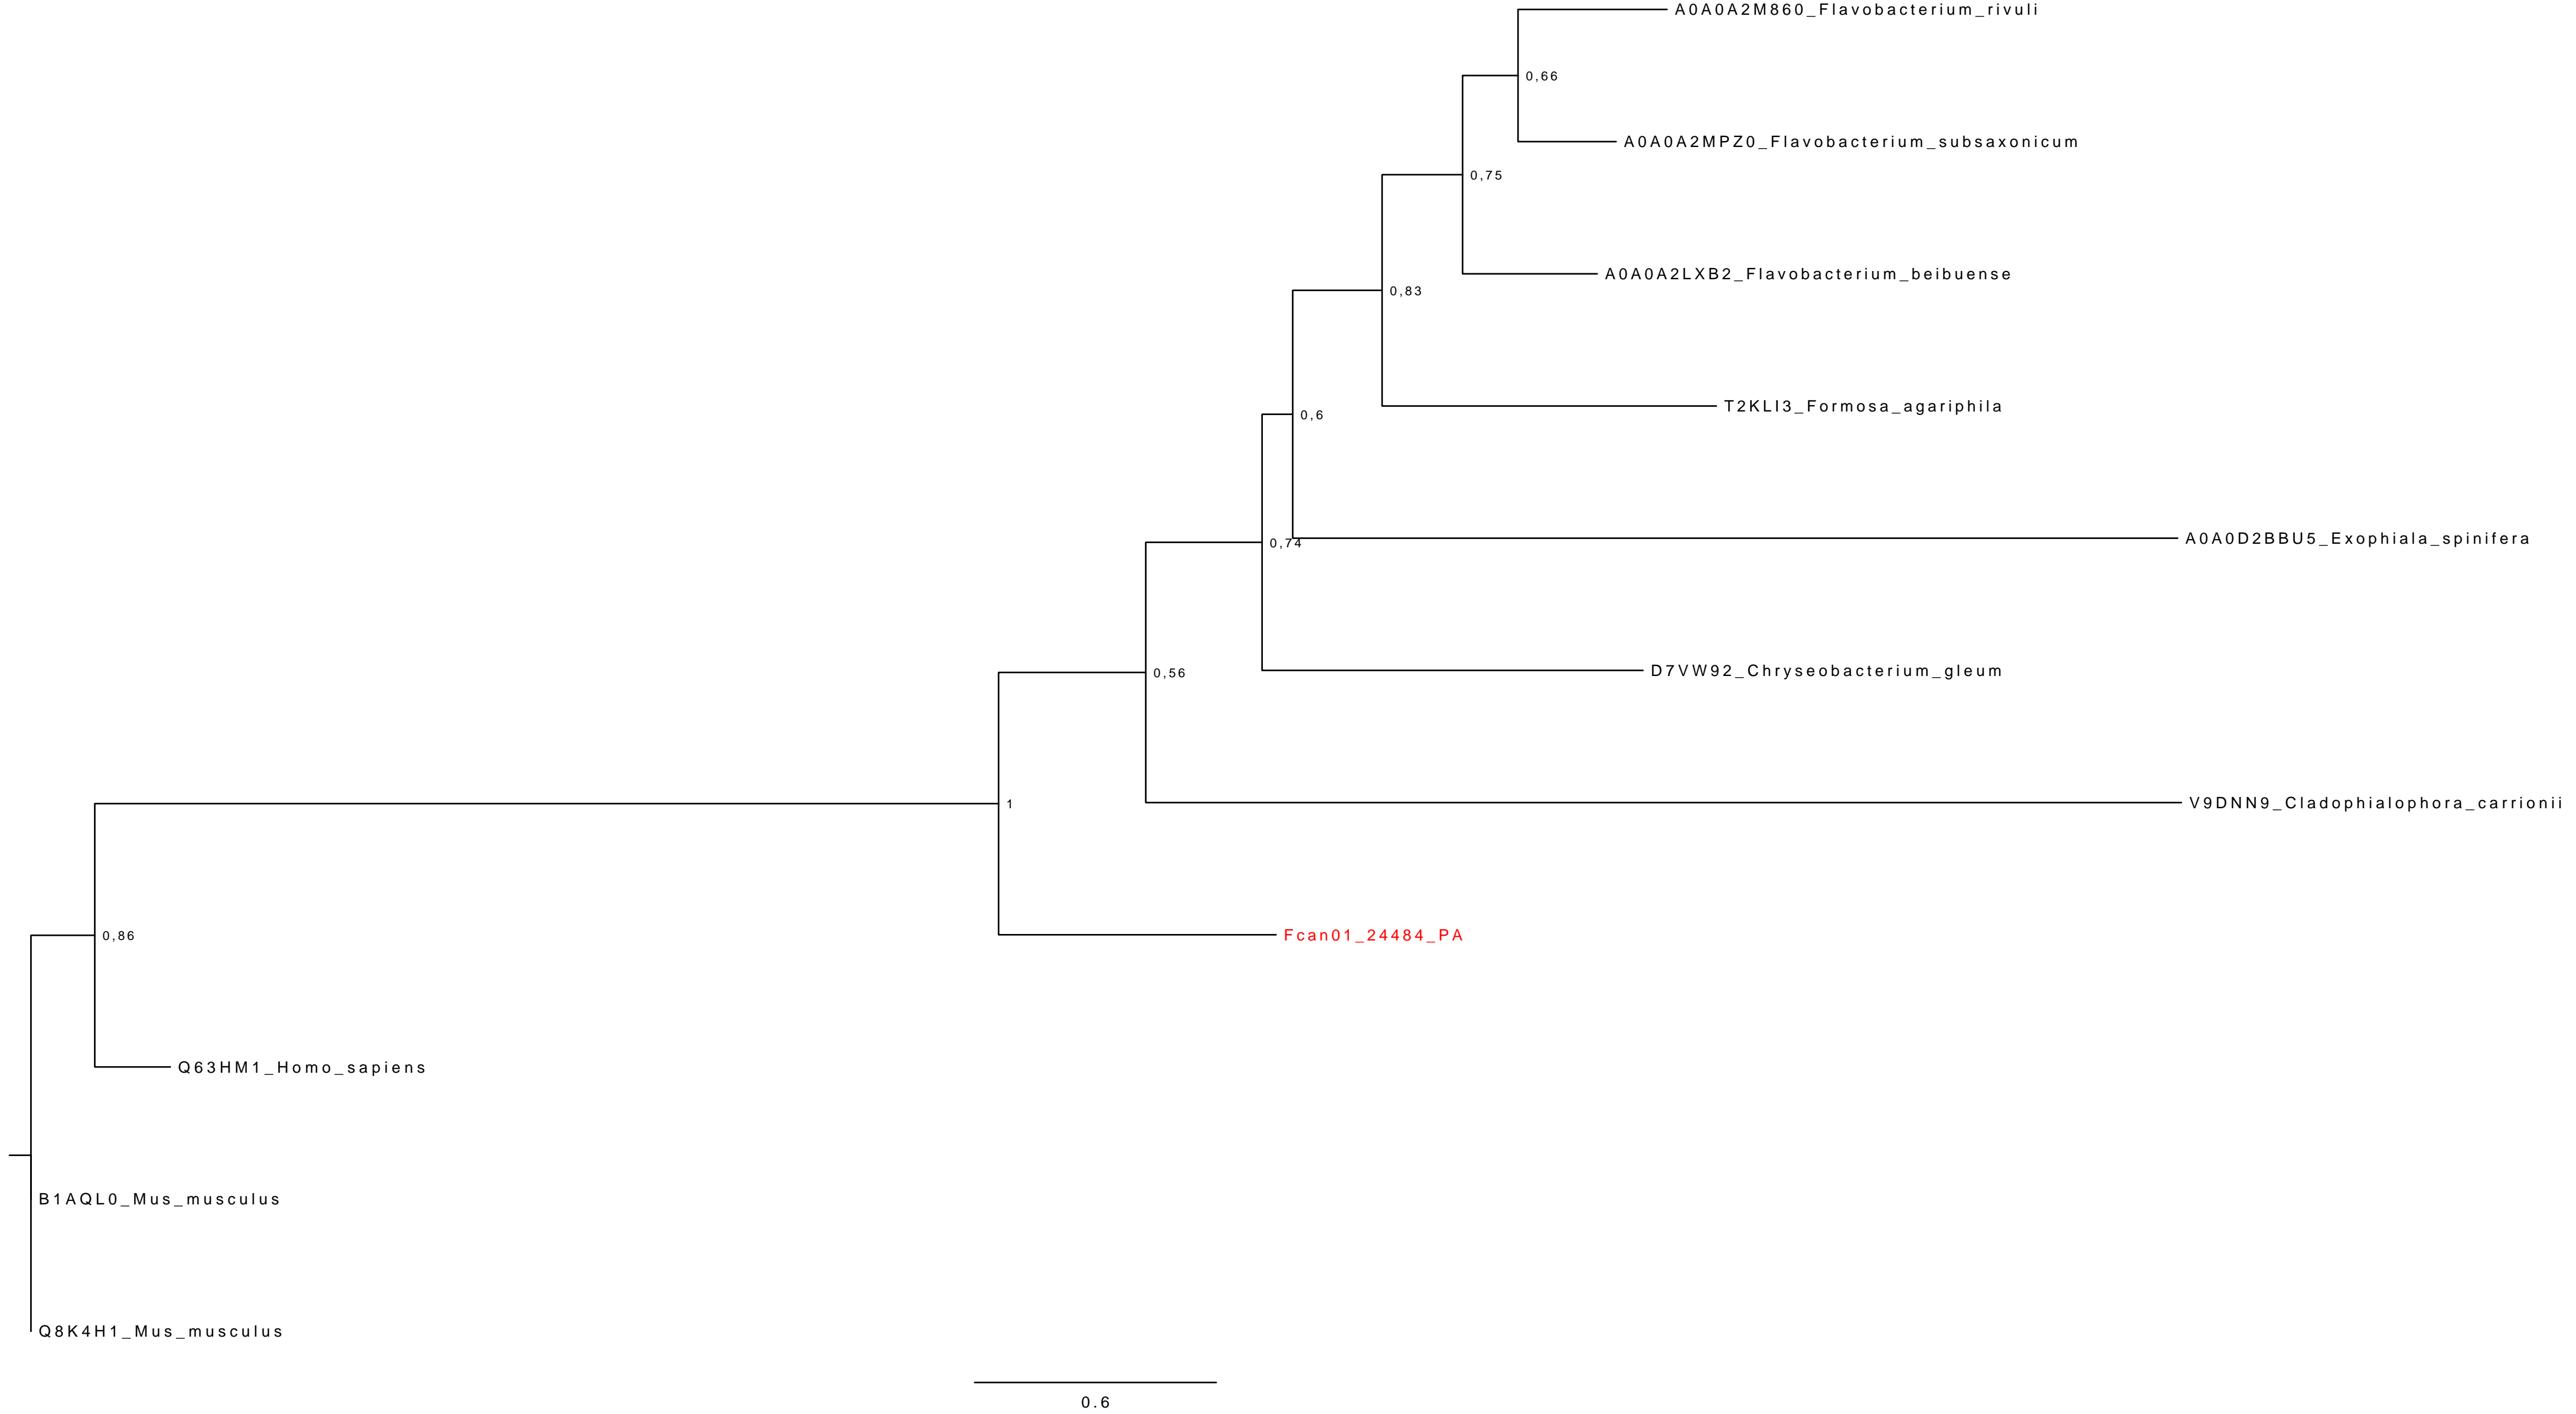

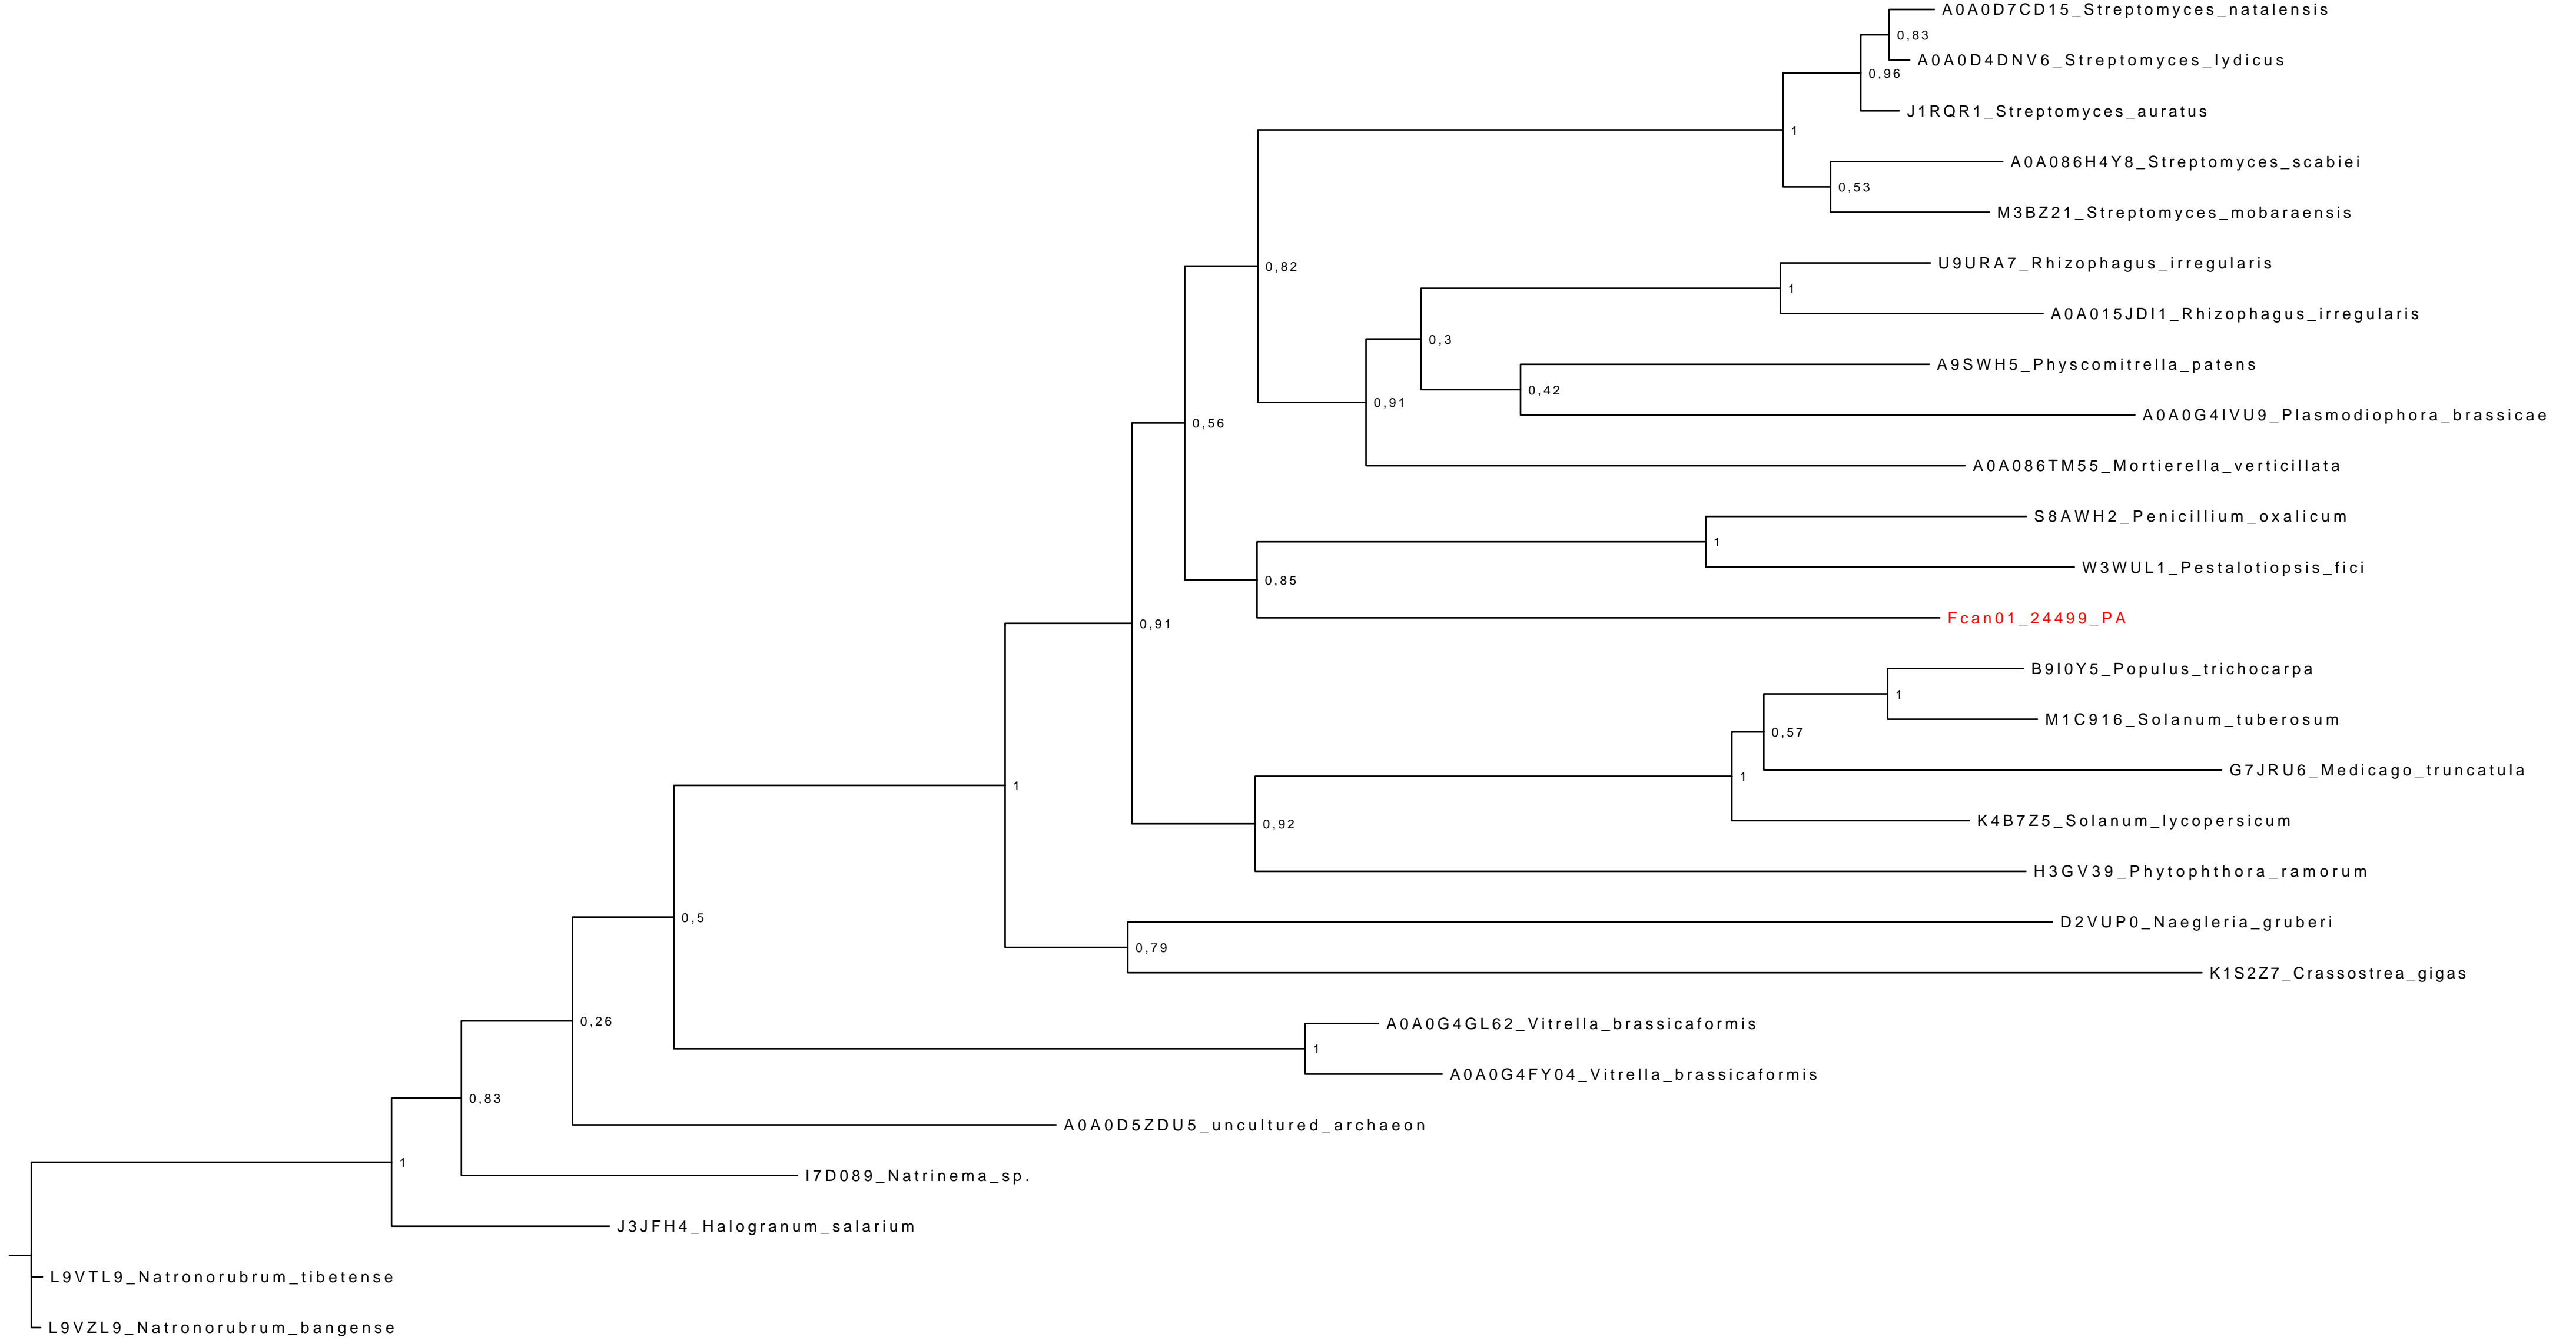

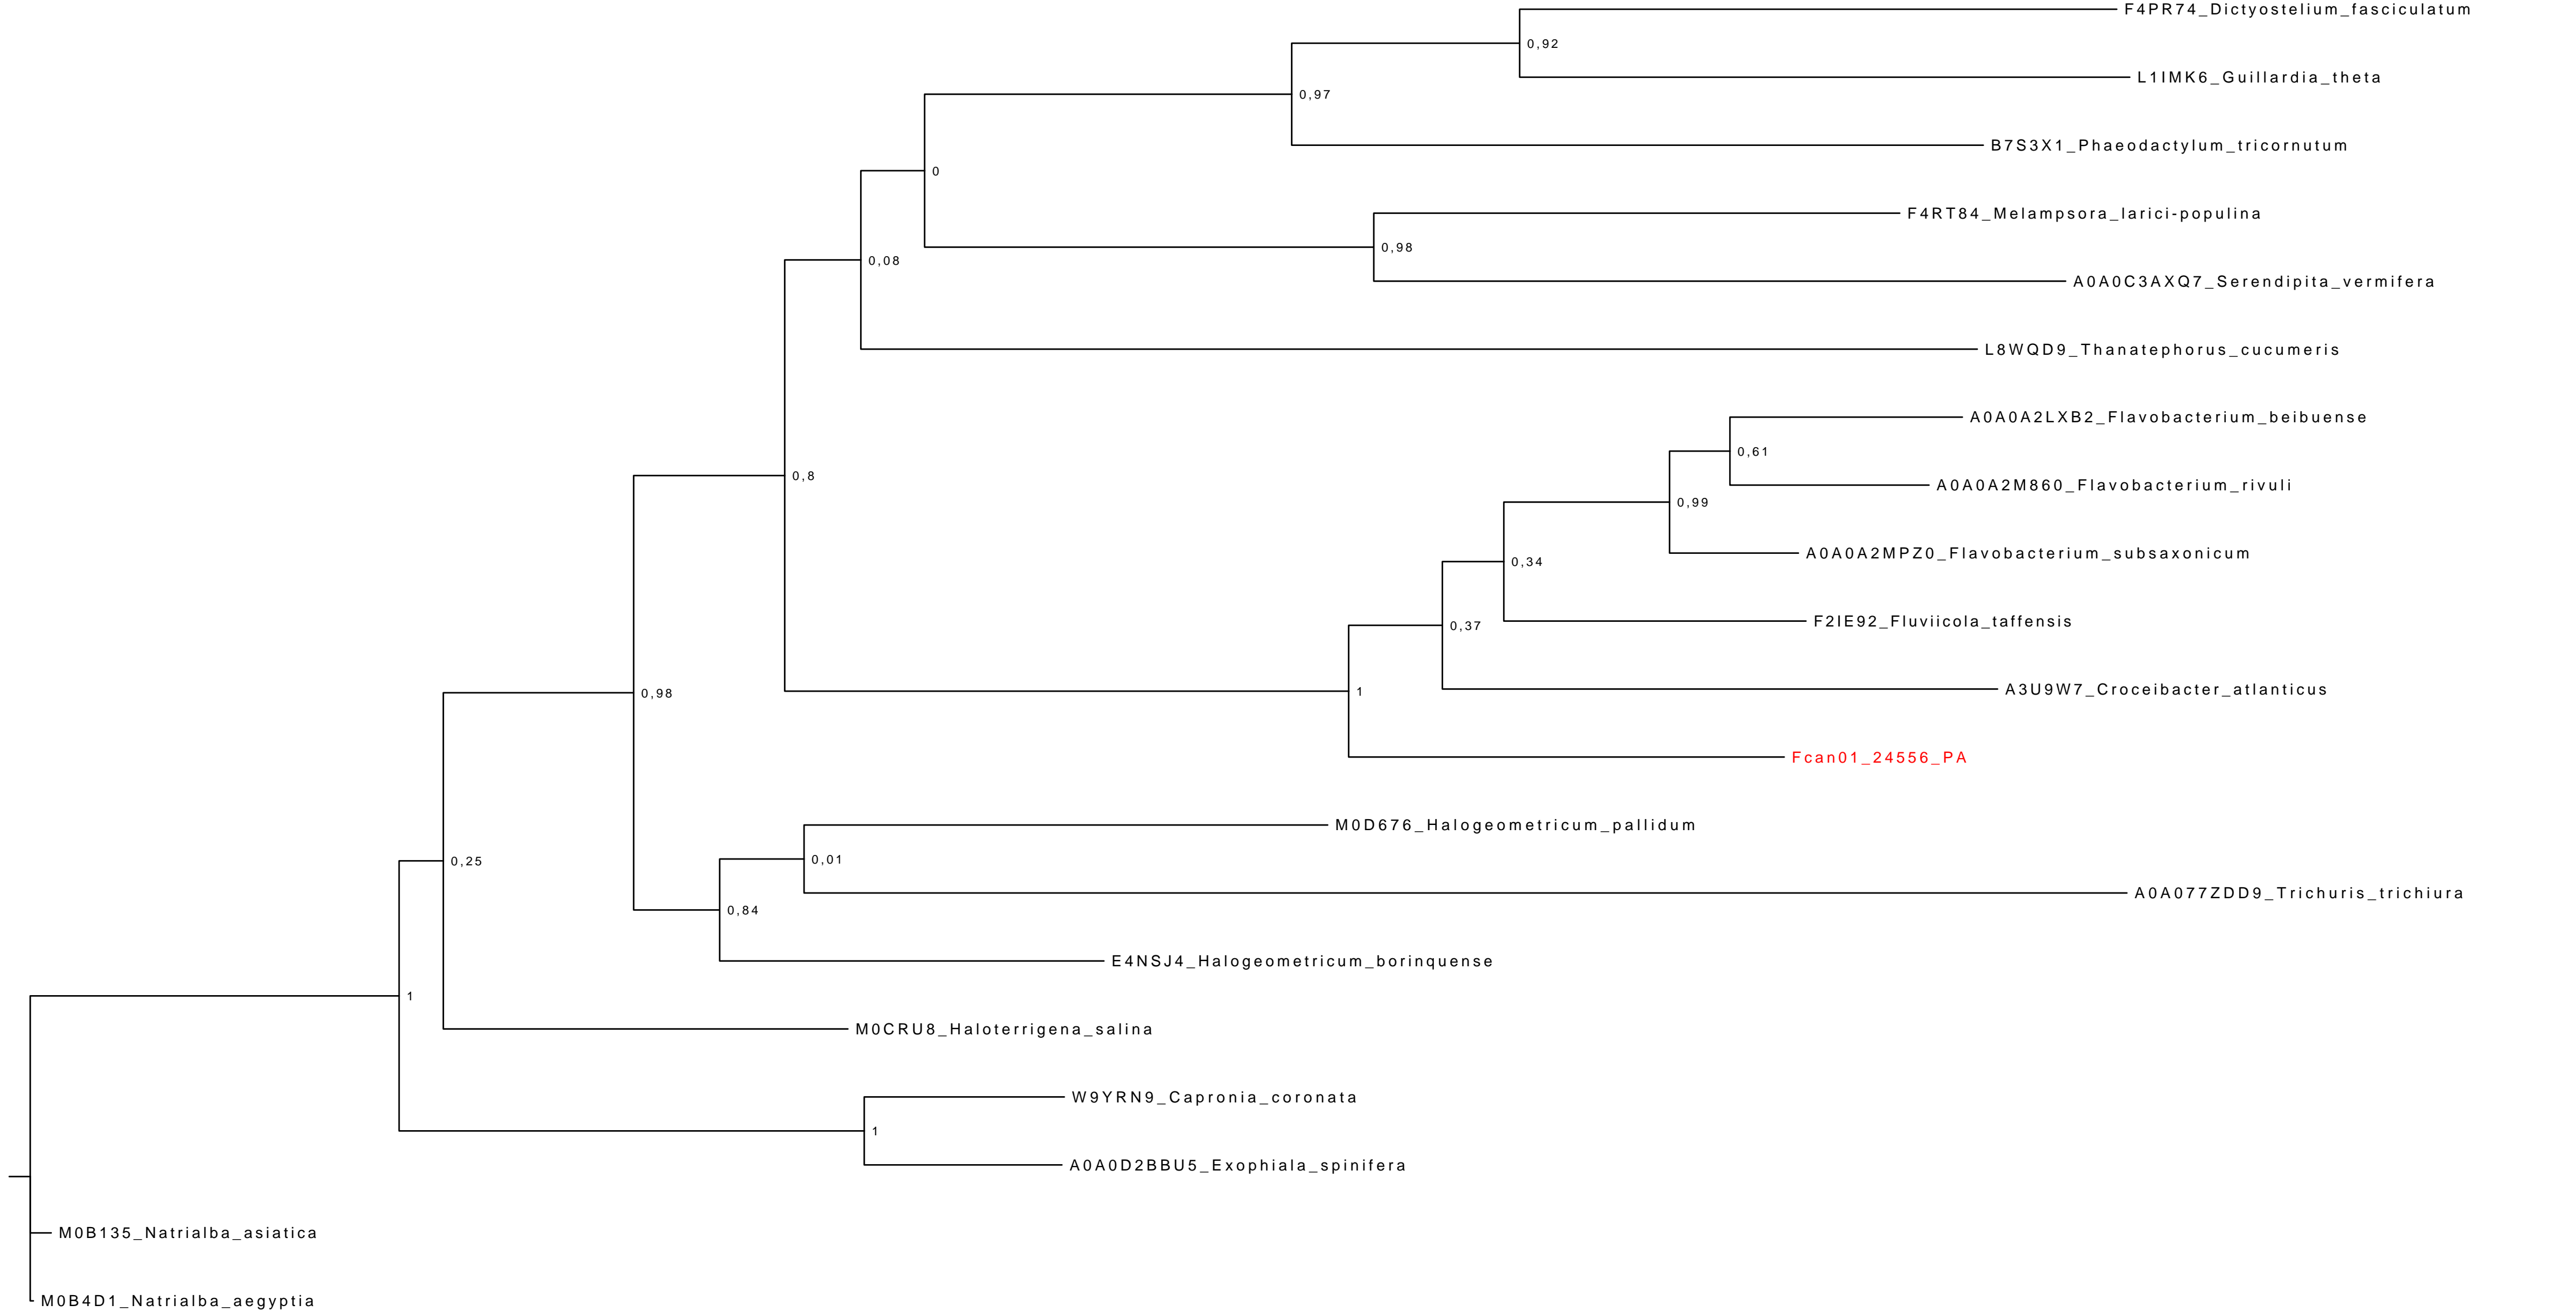

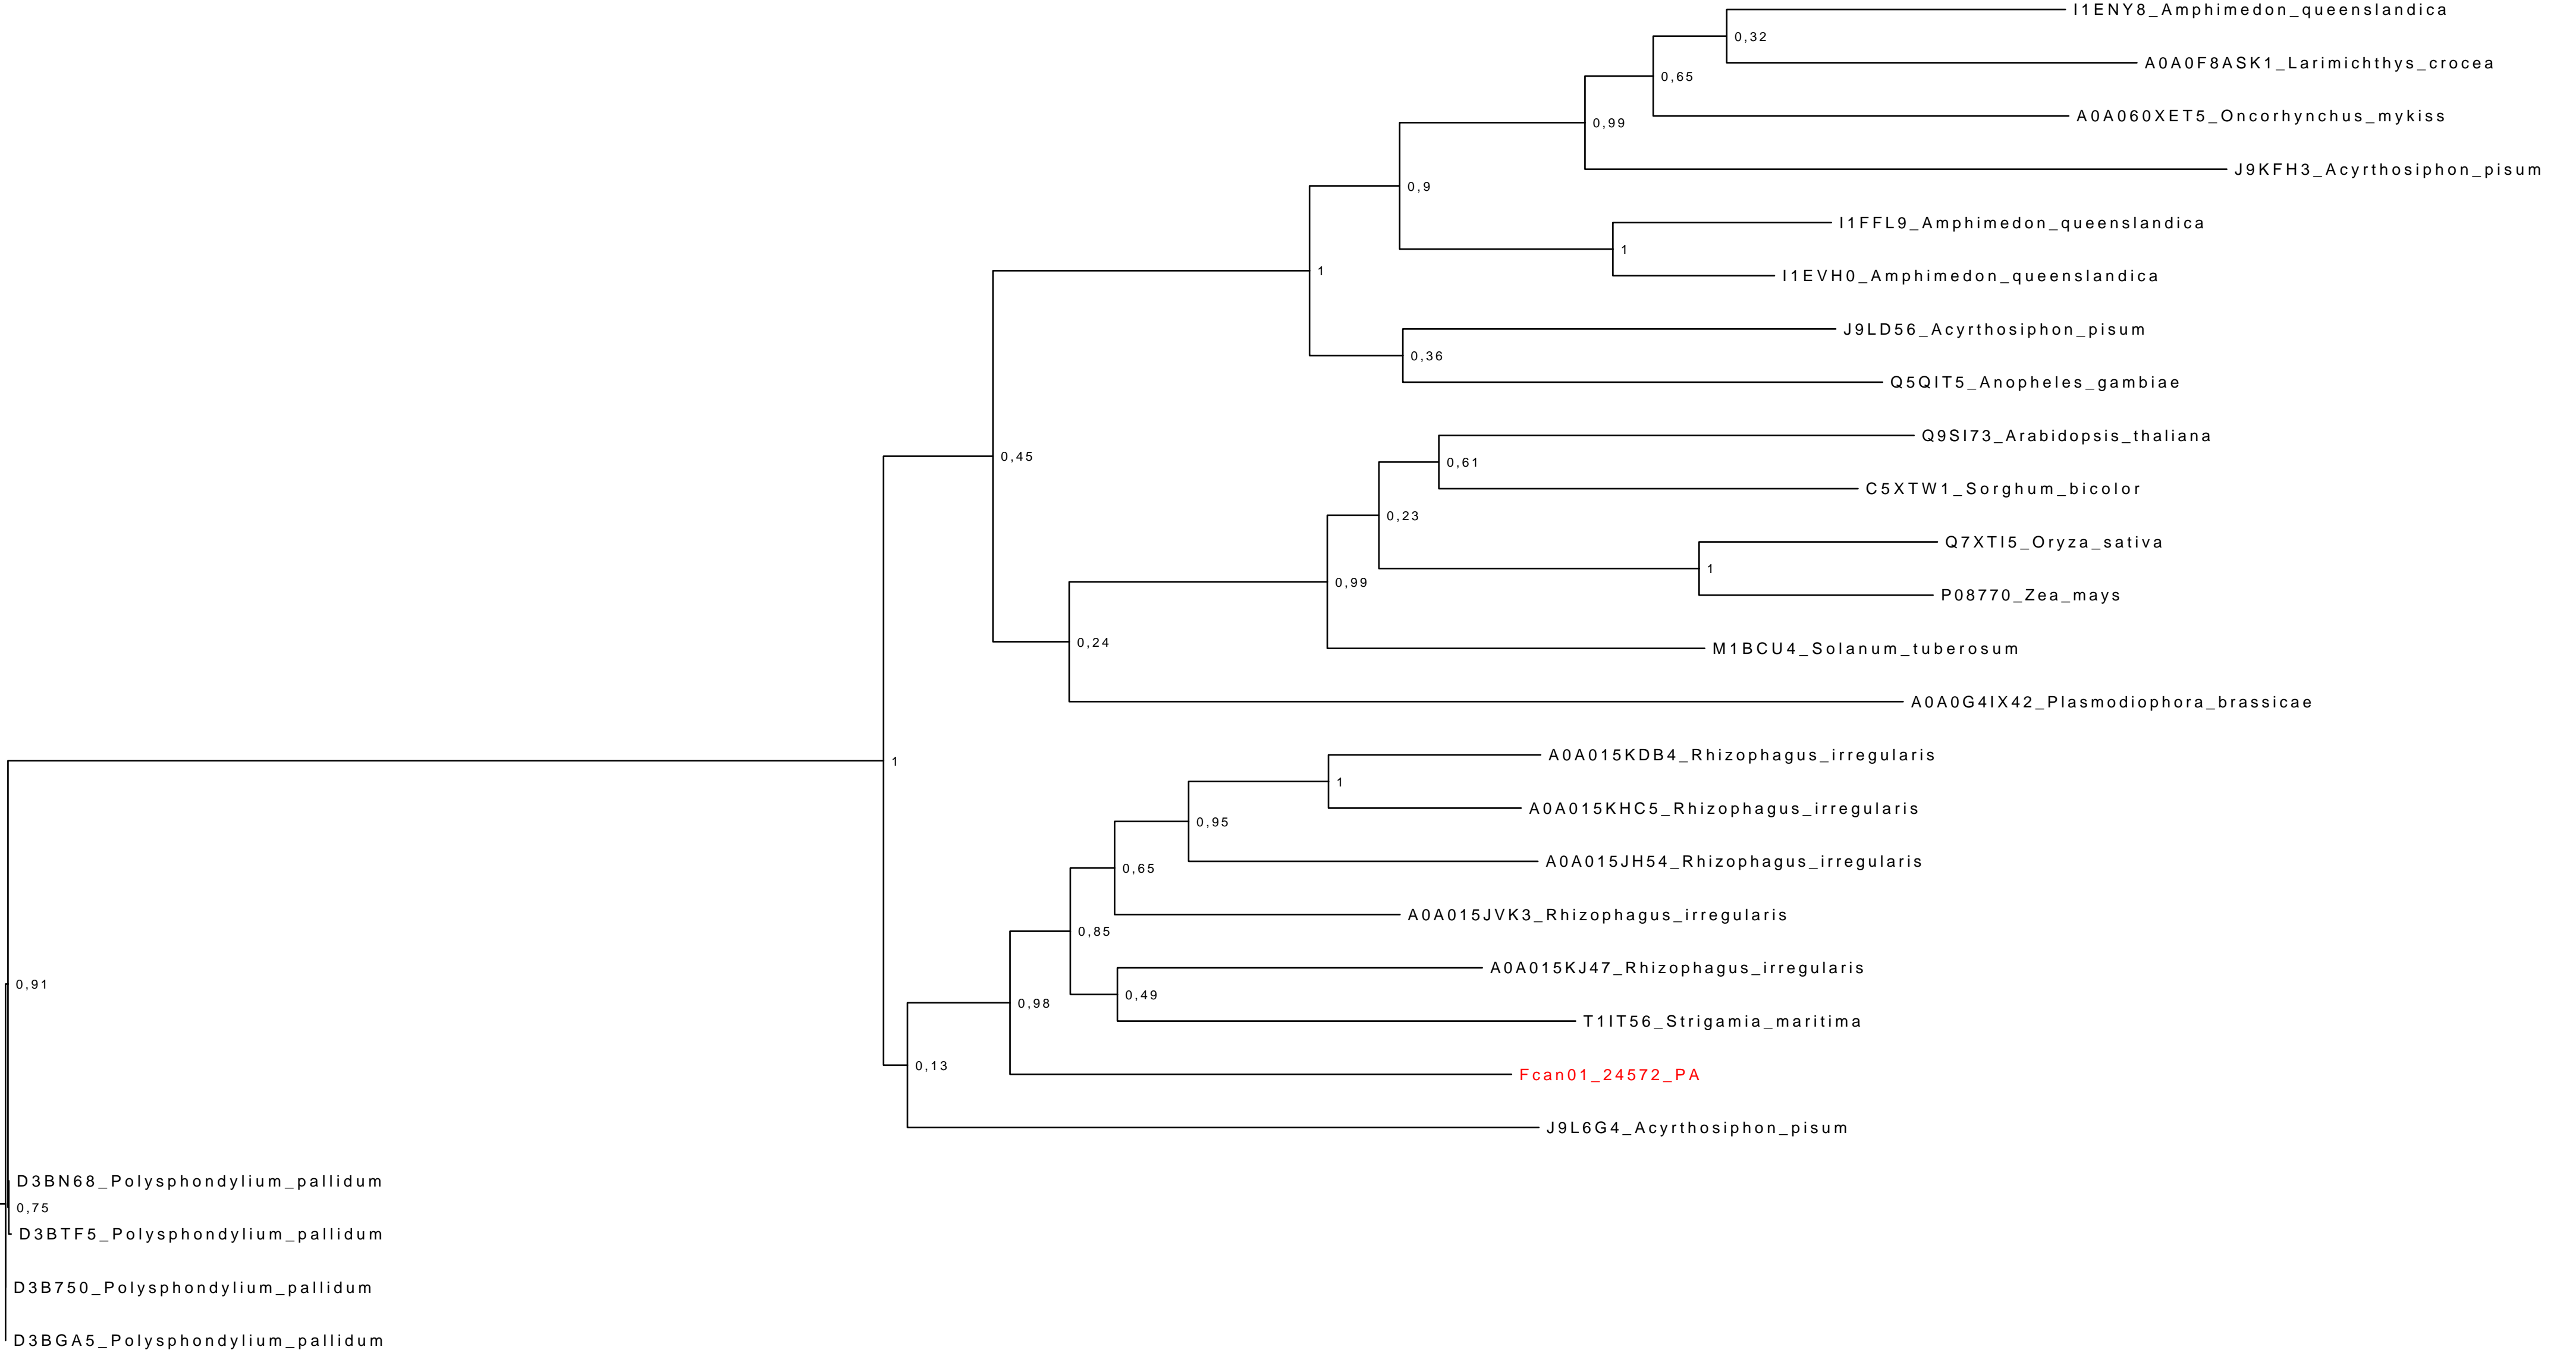

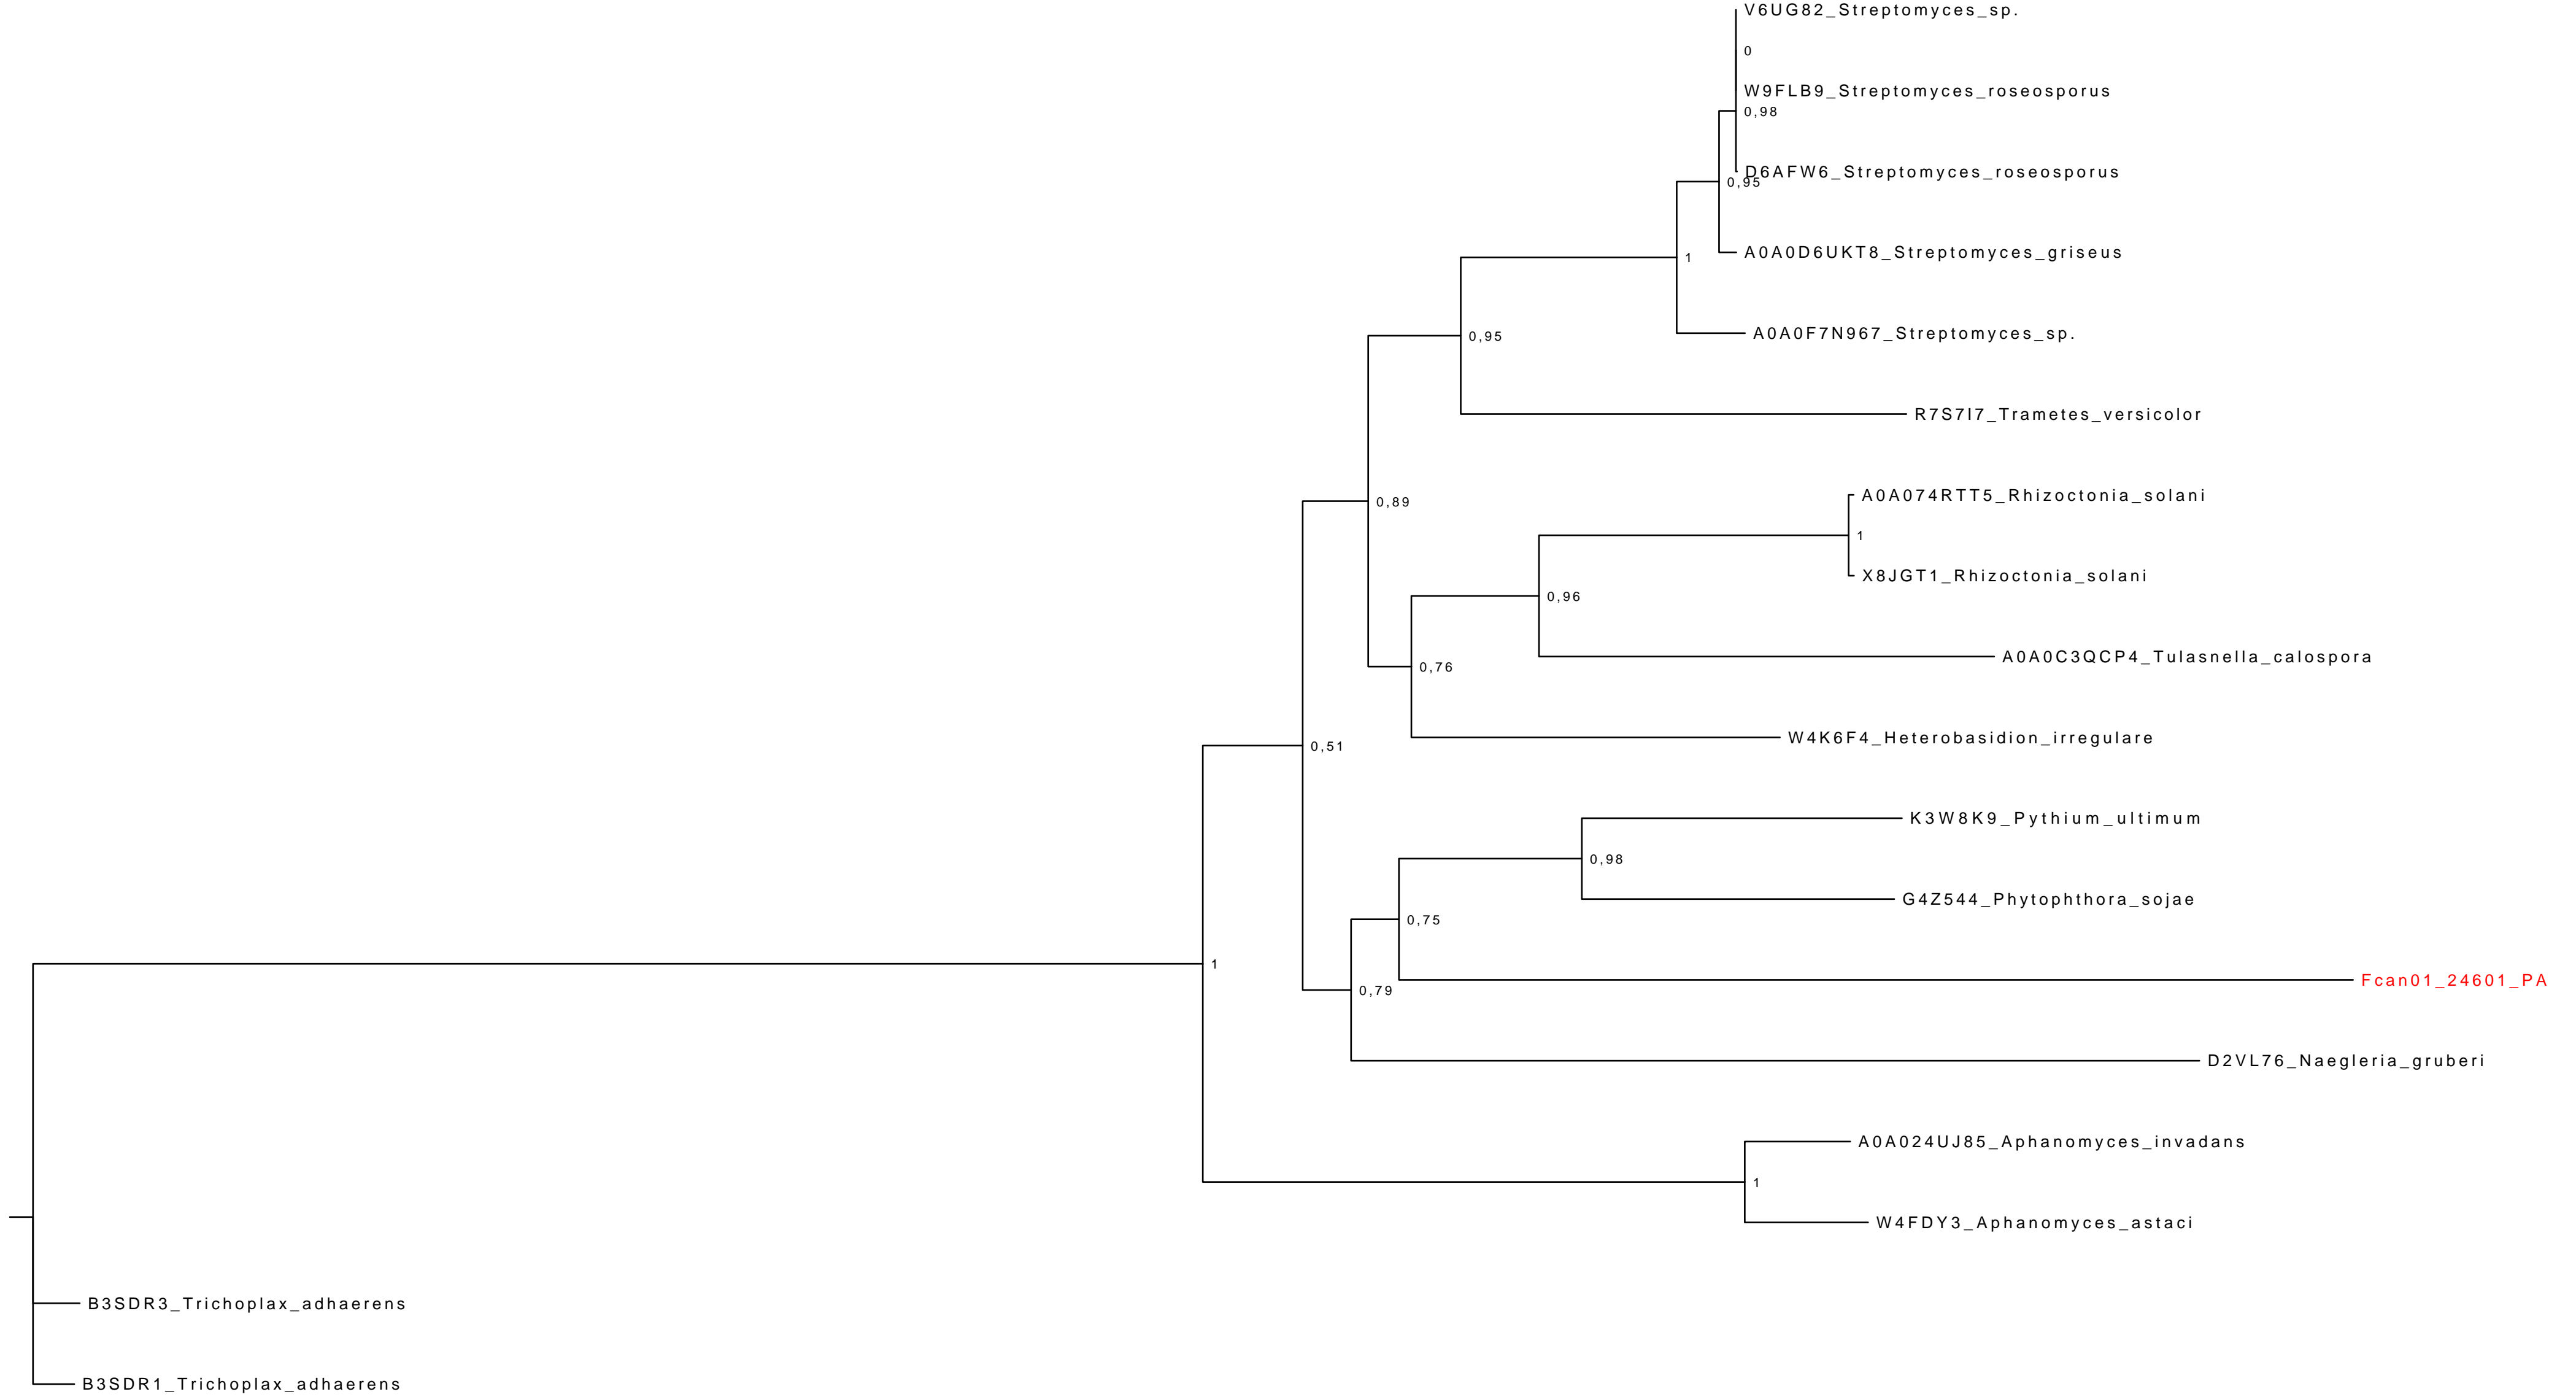

0.5

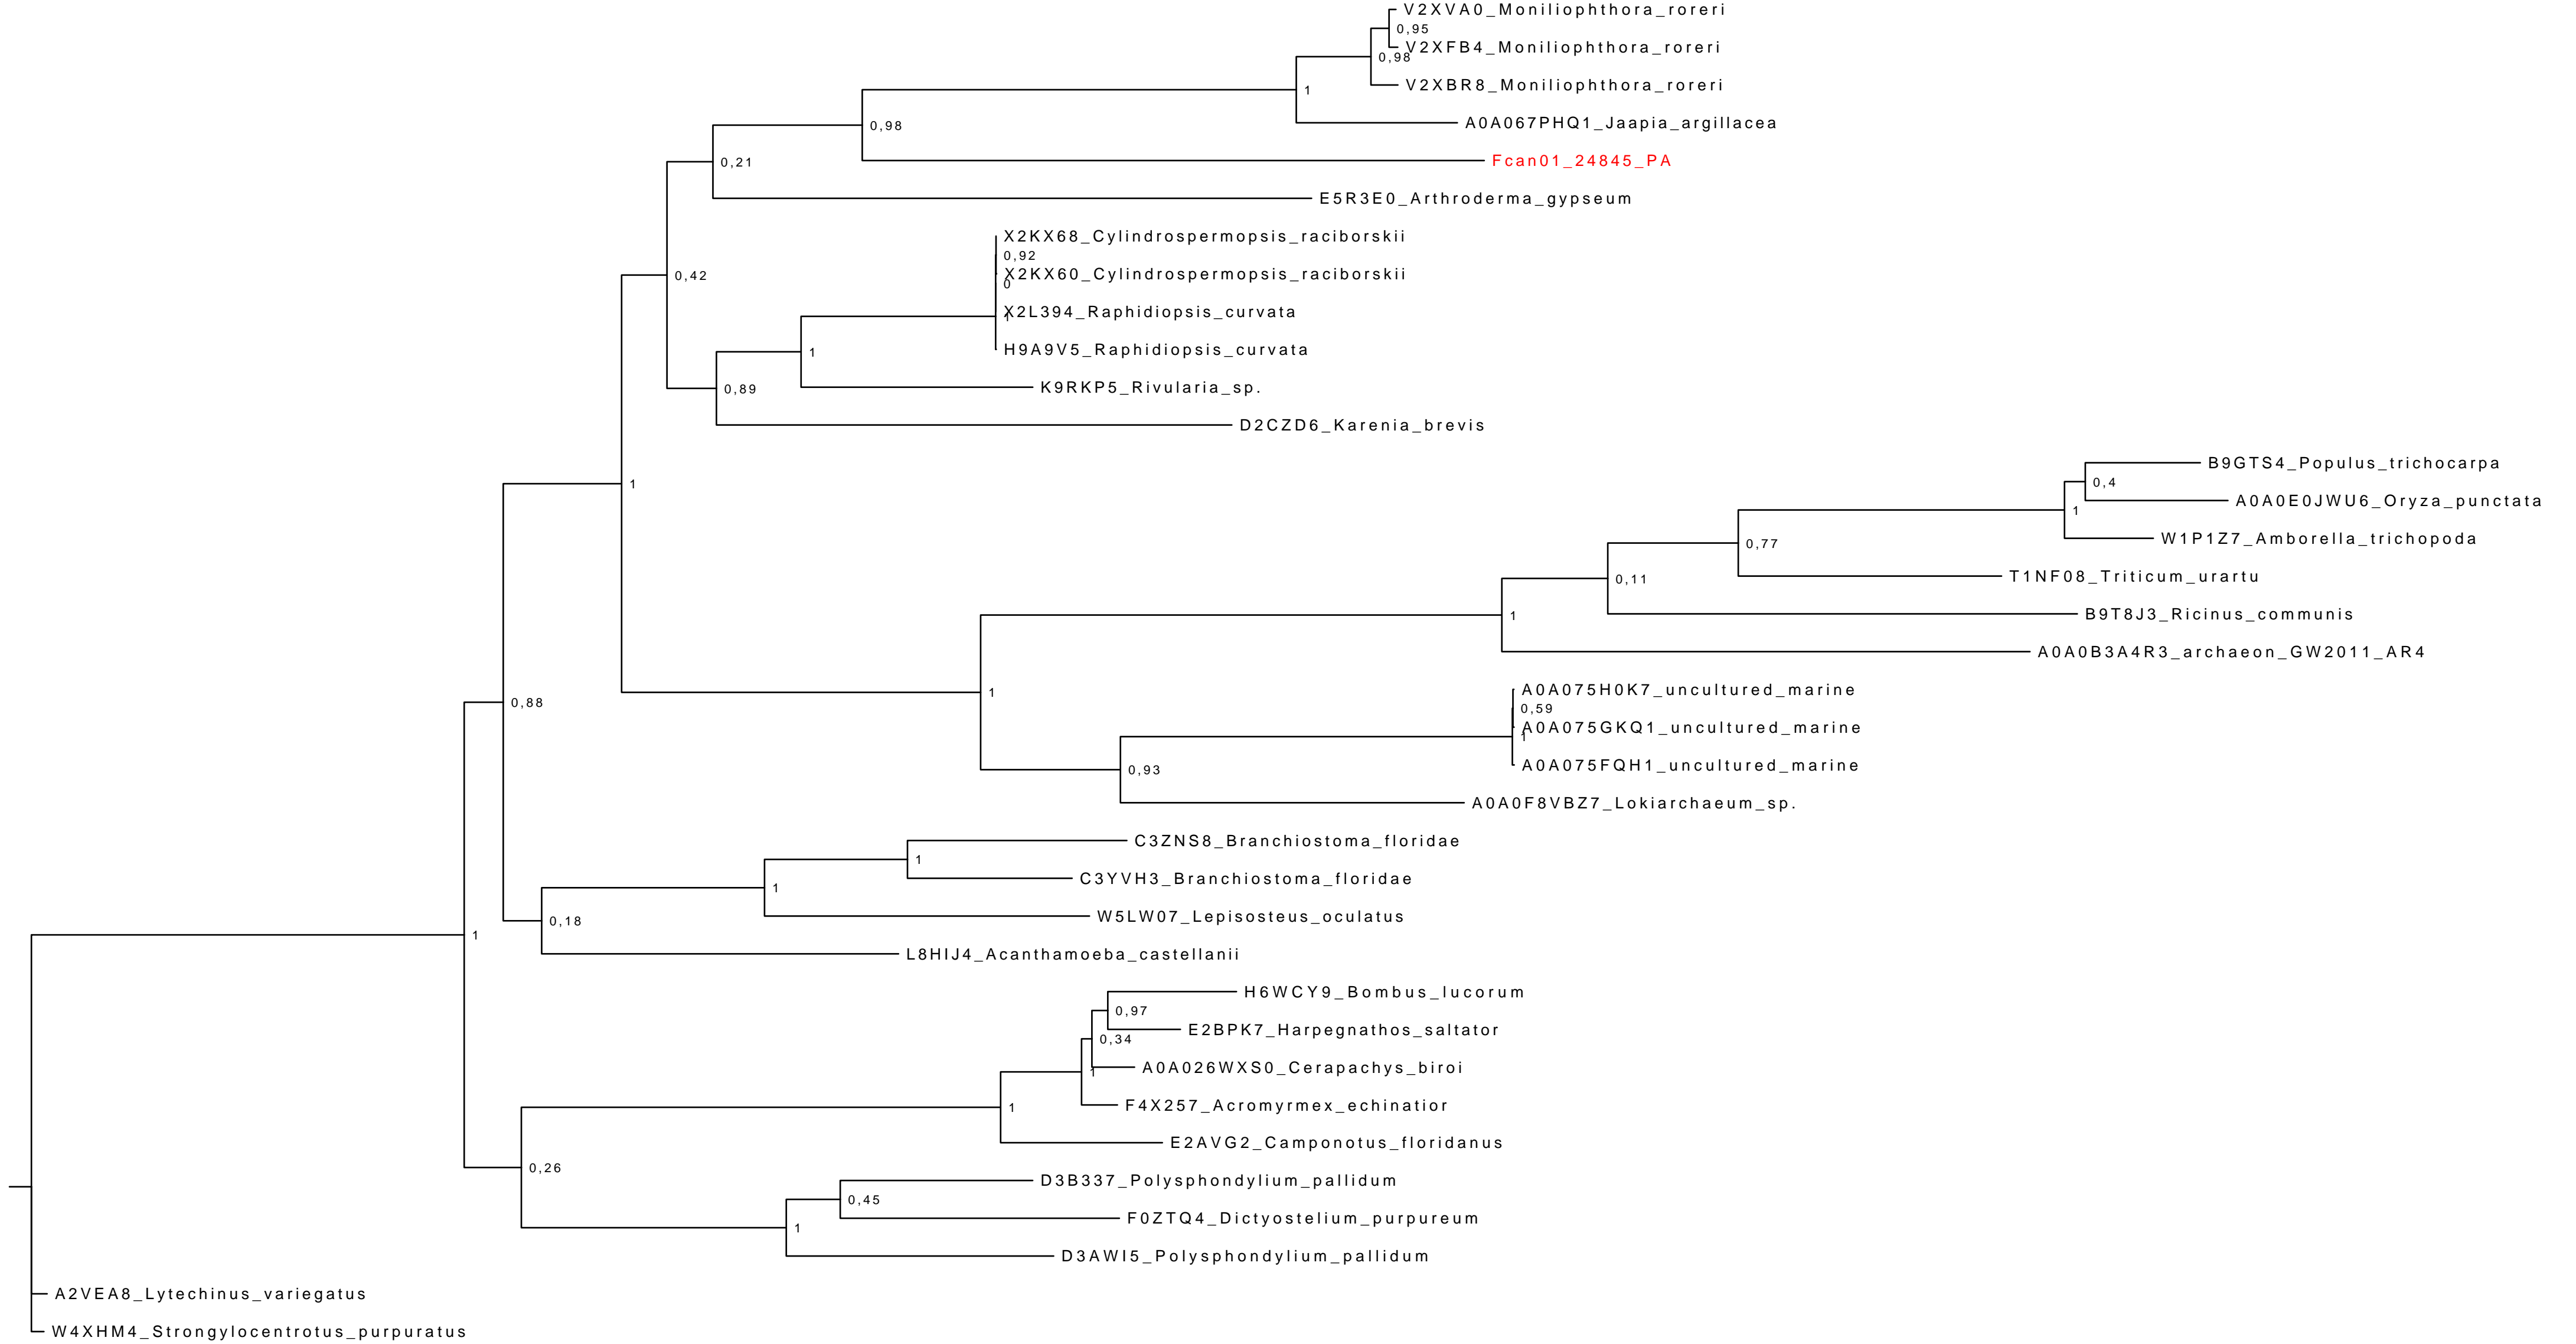

0.6

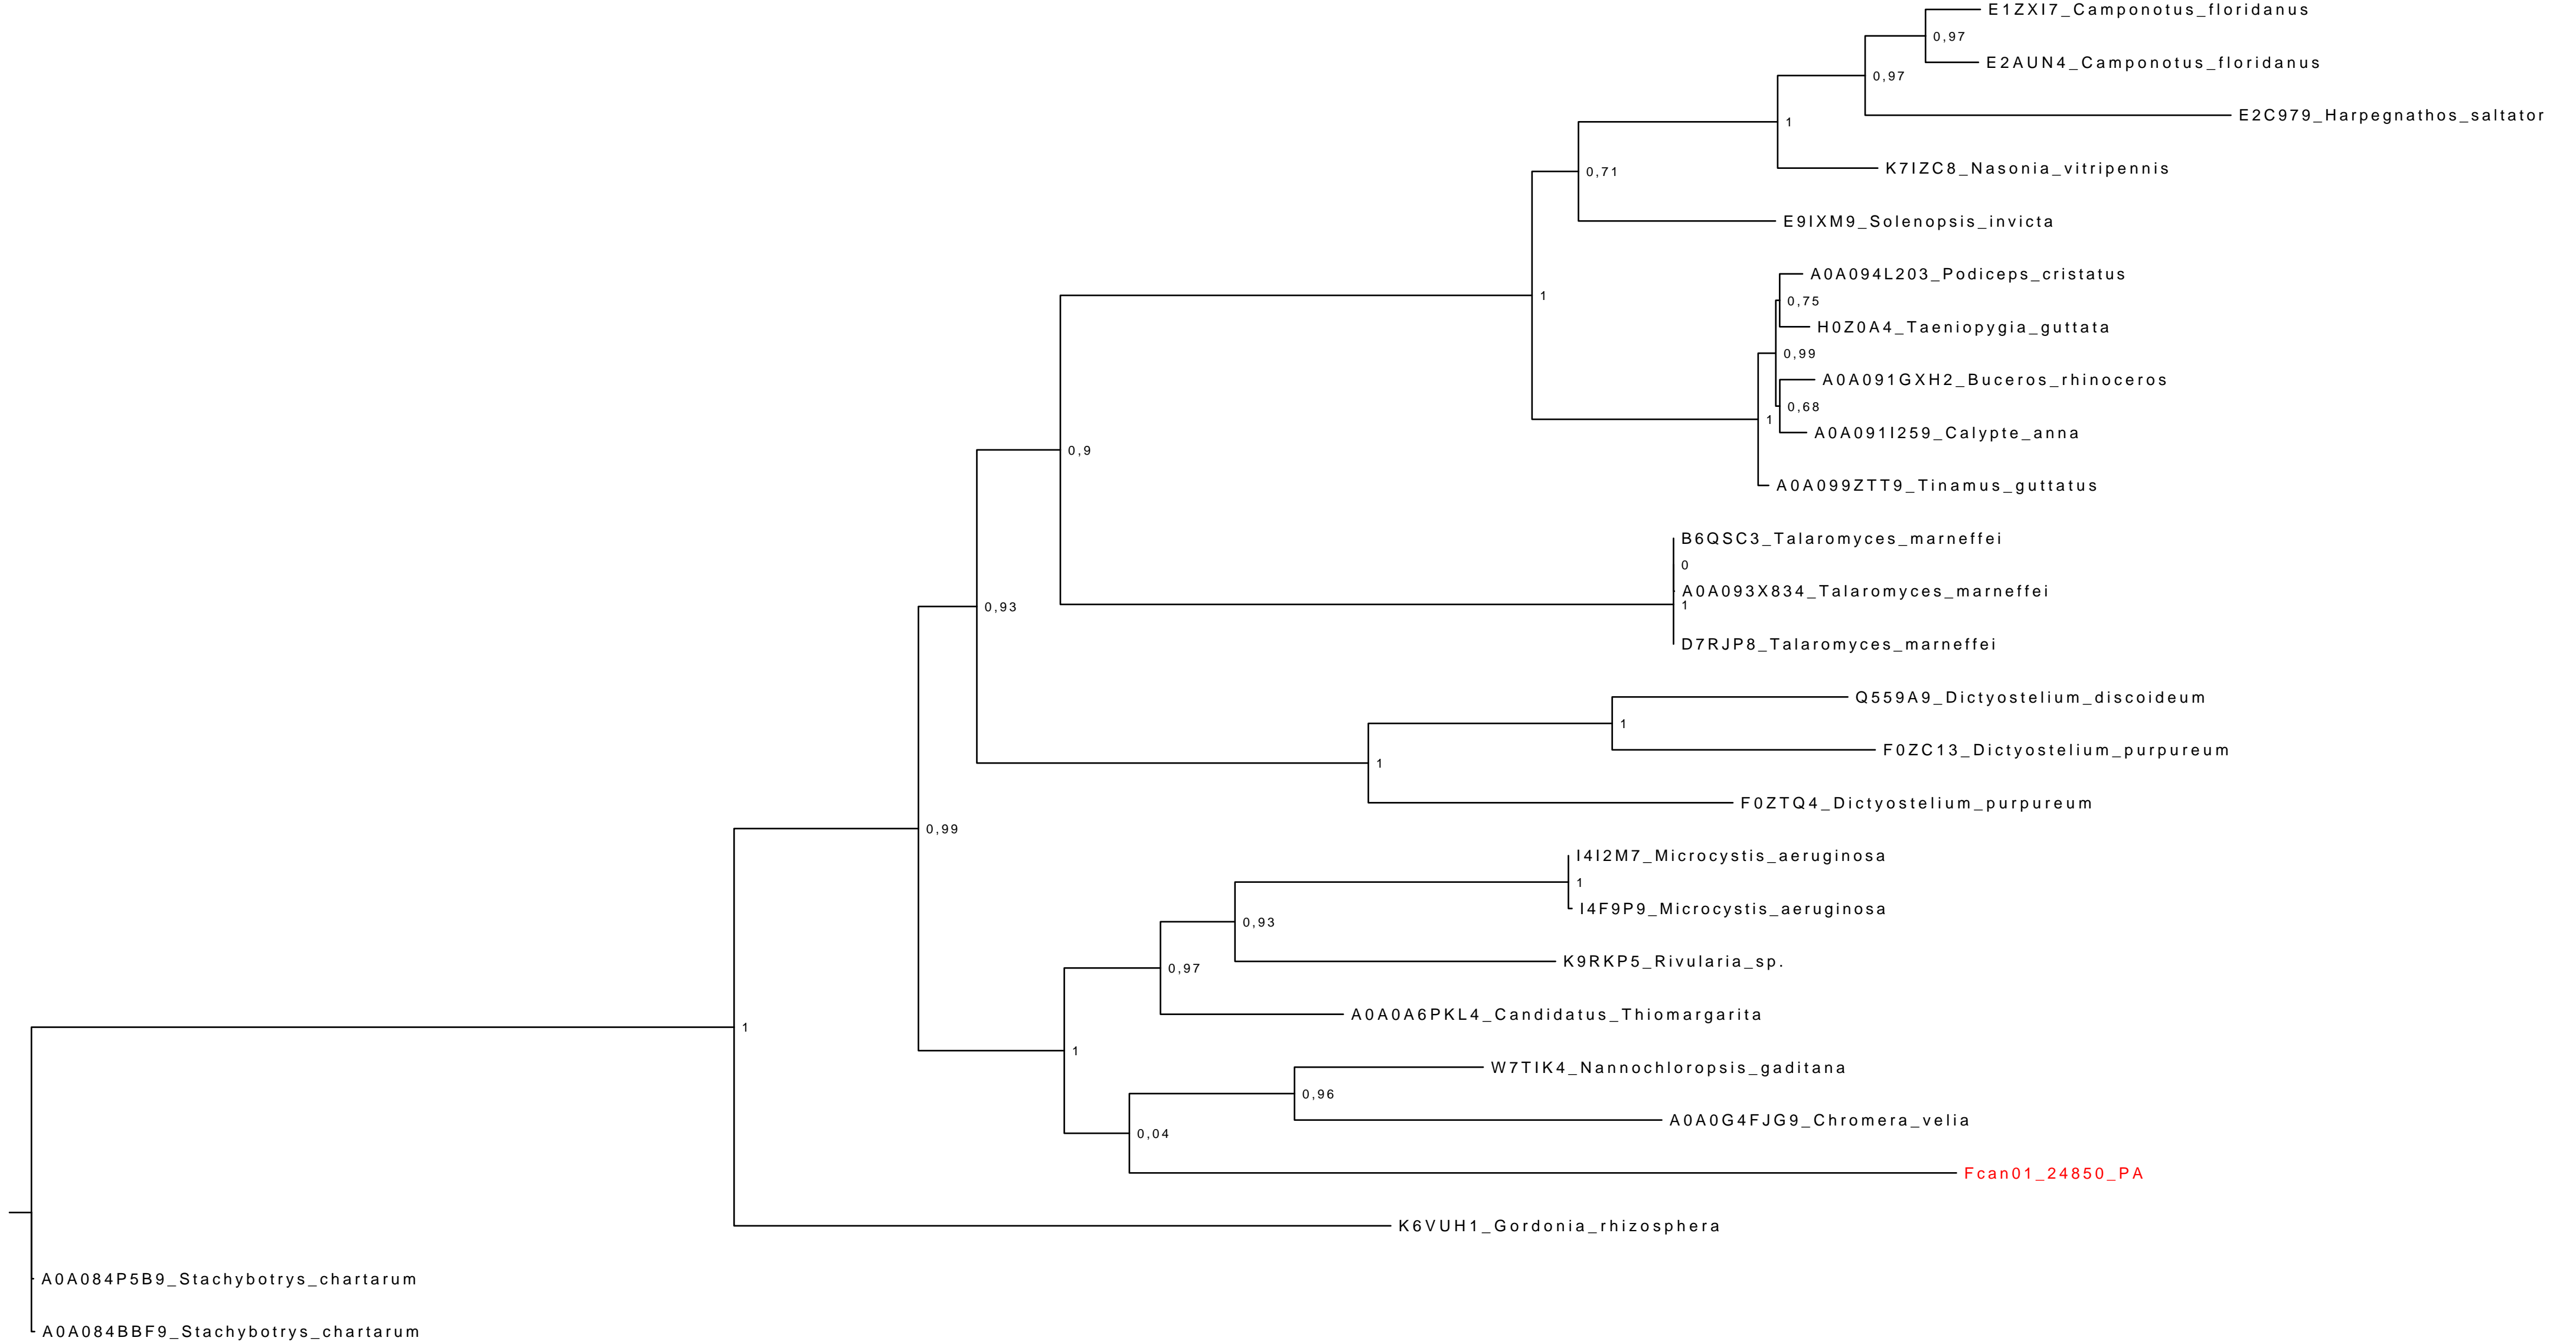



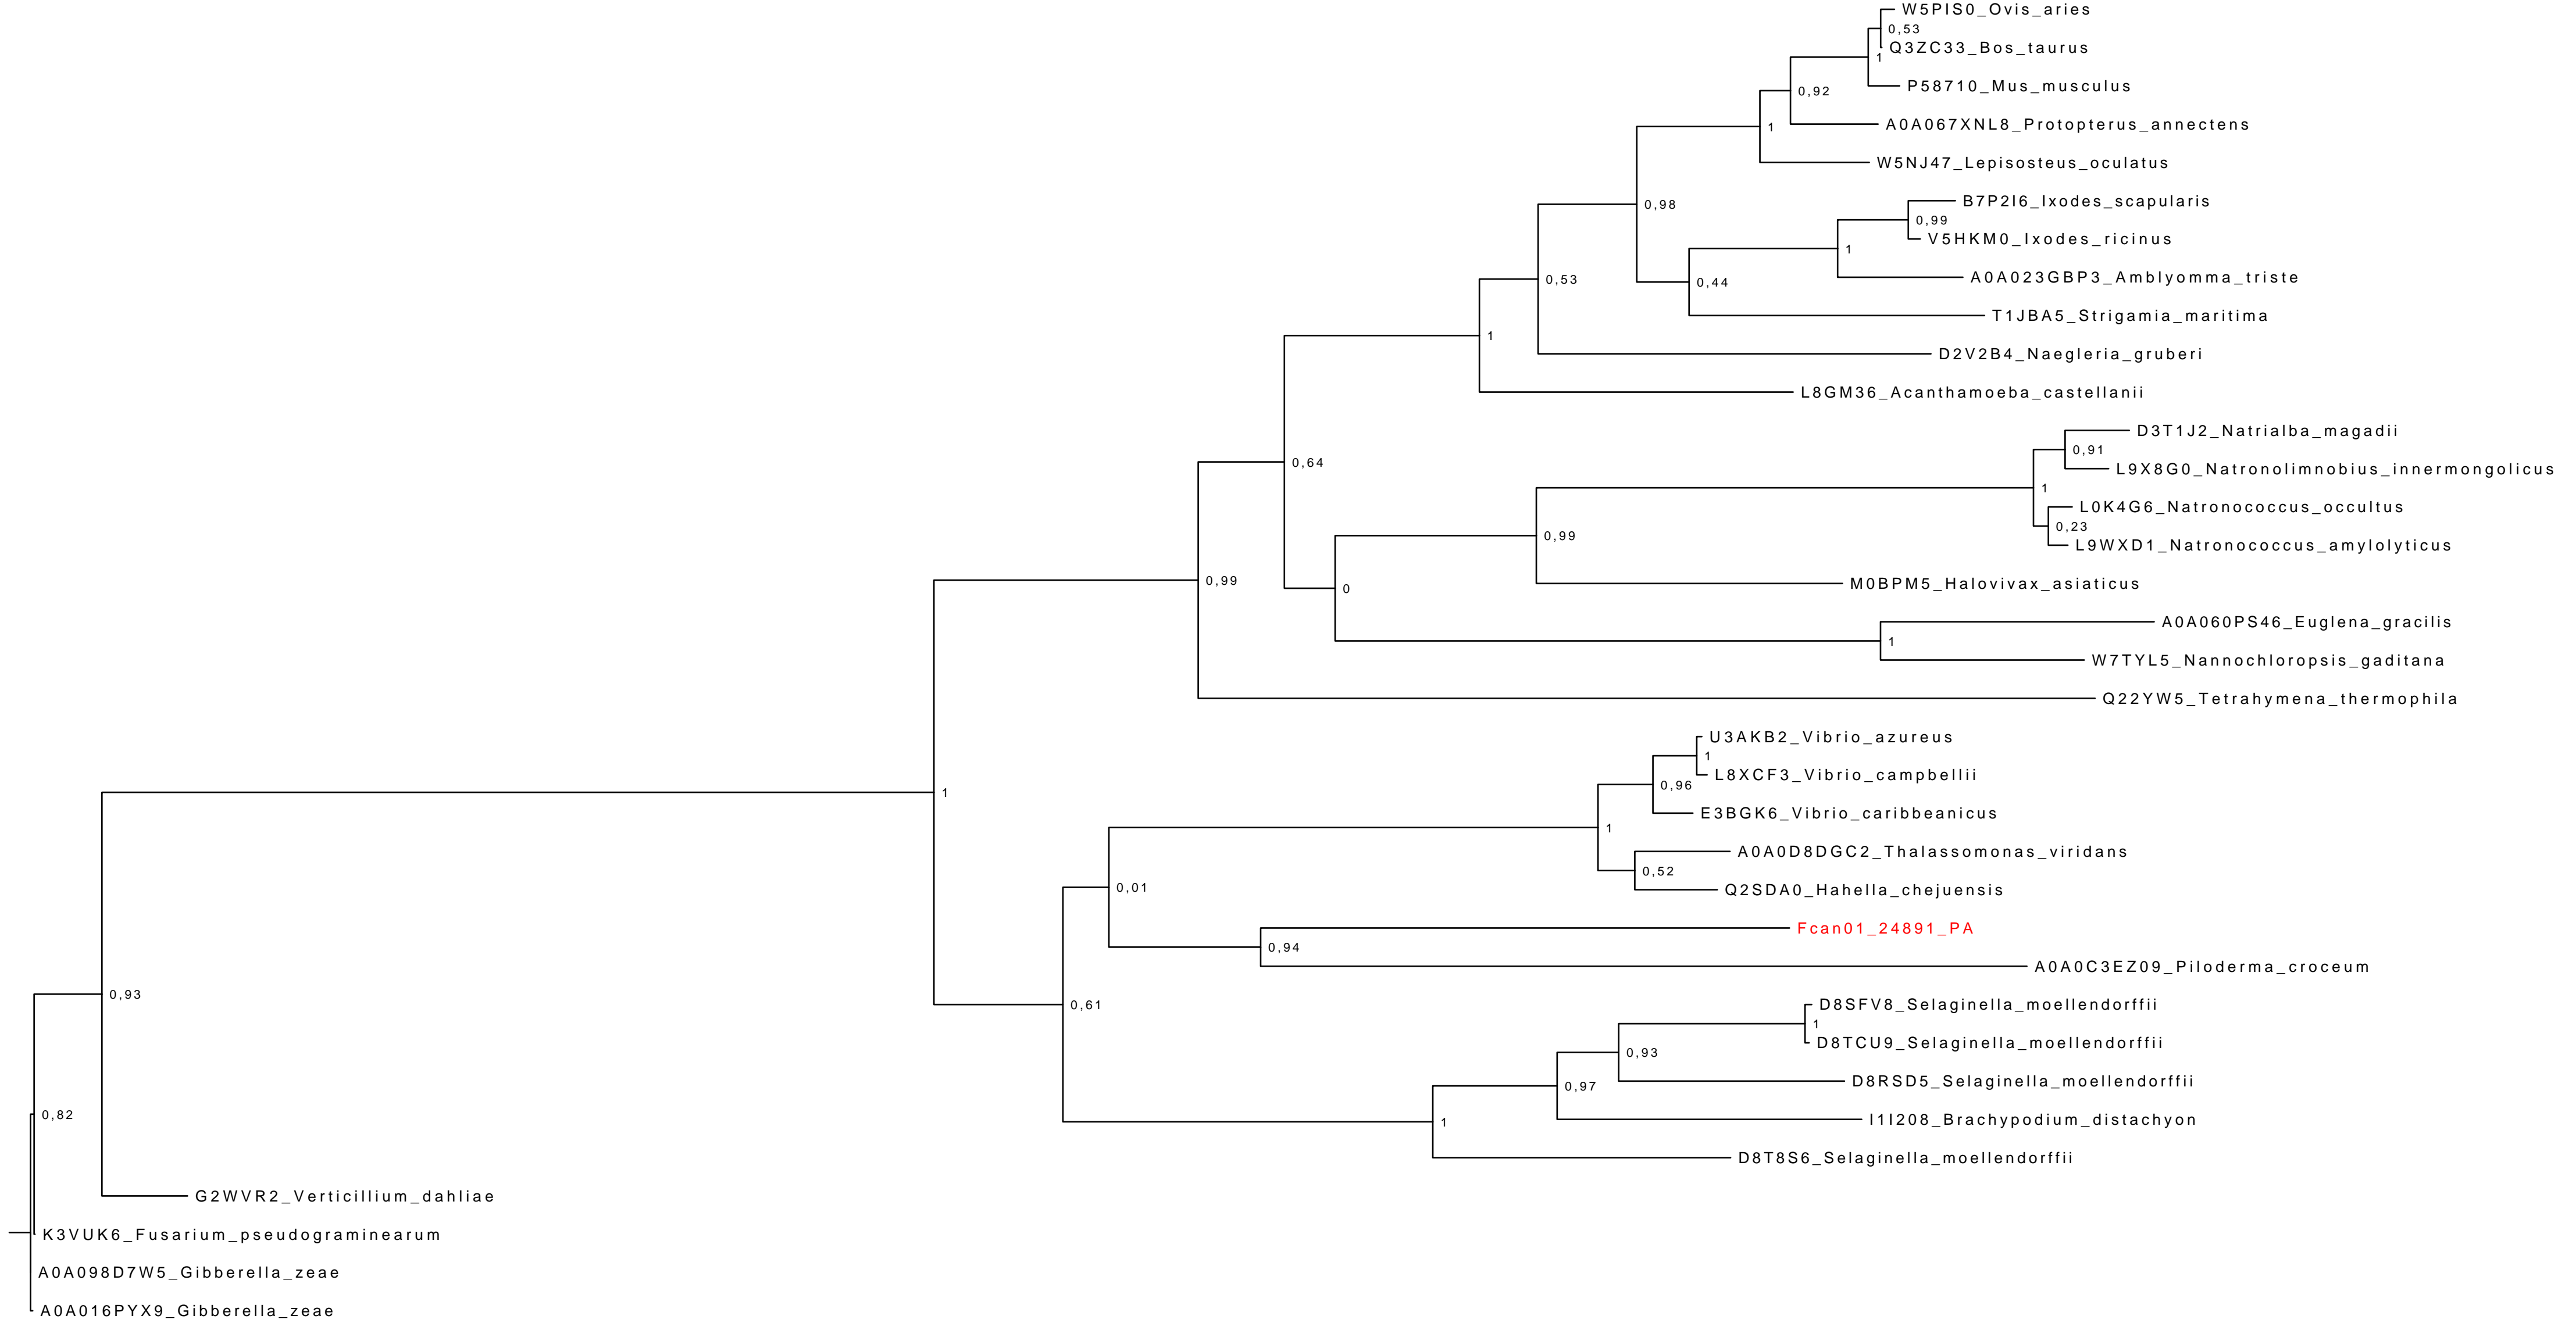

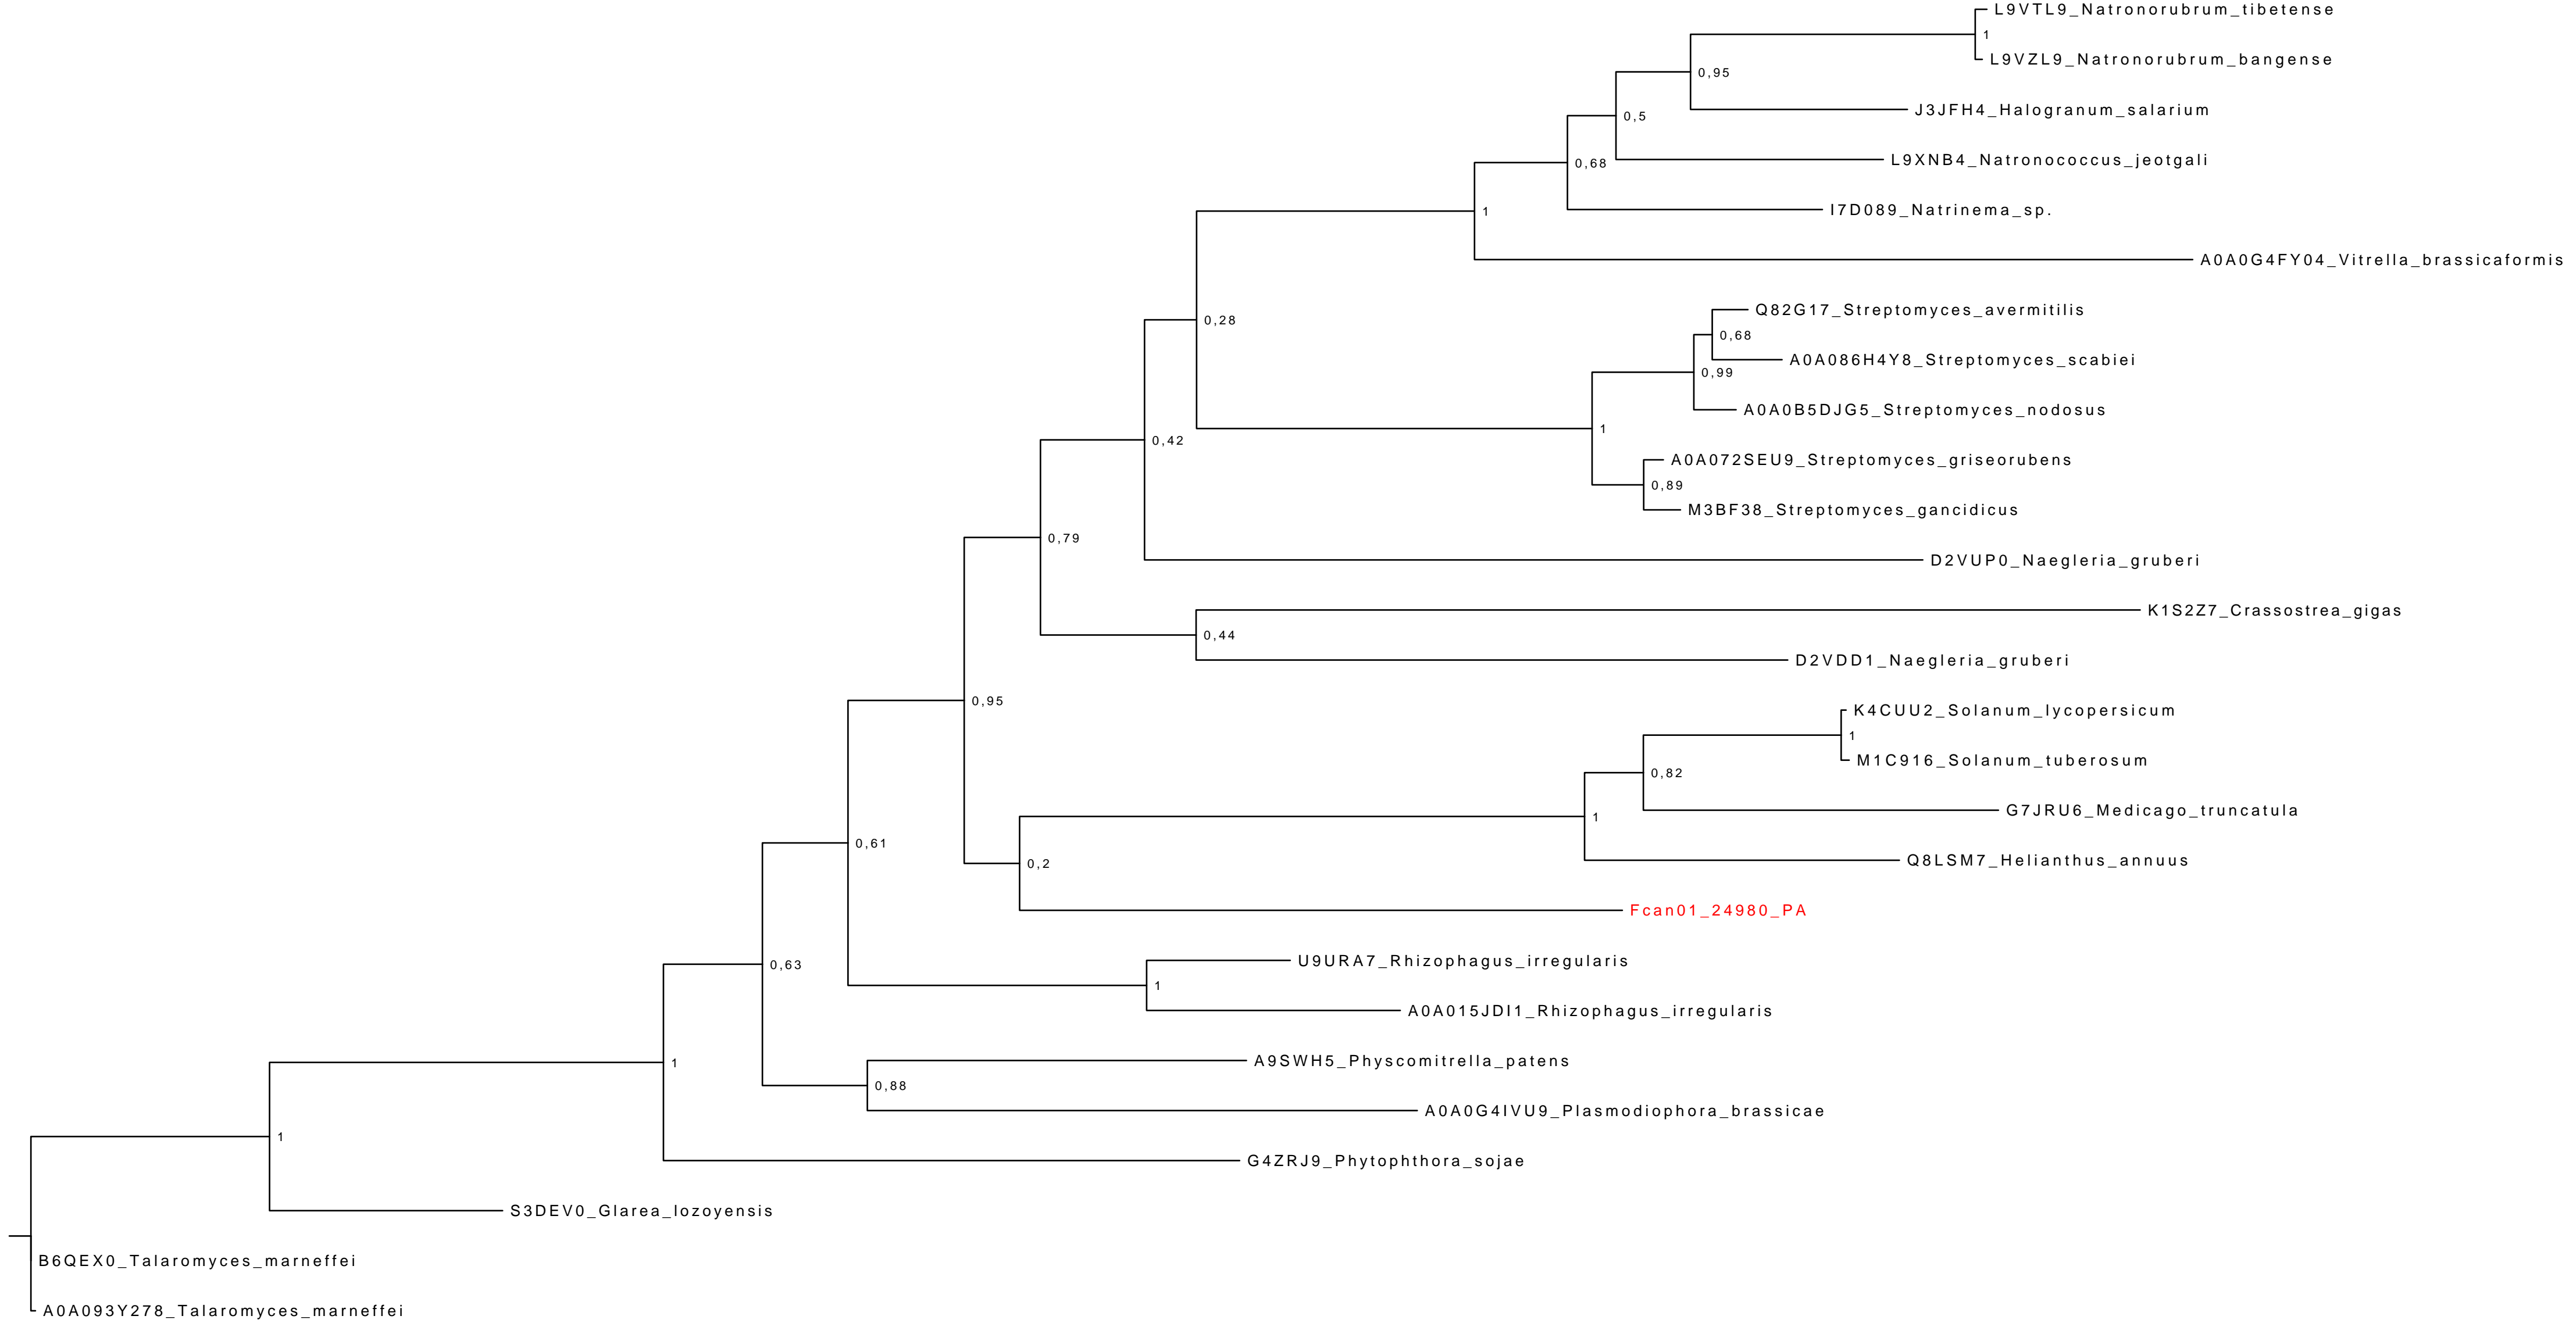

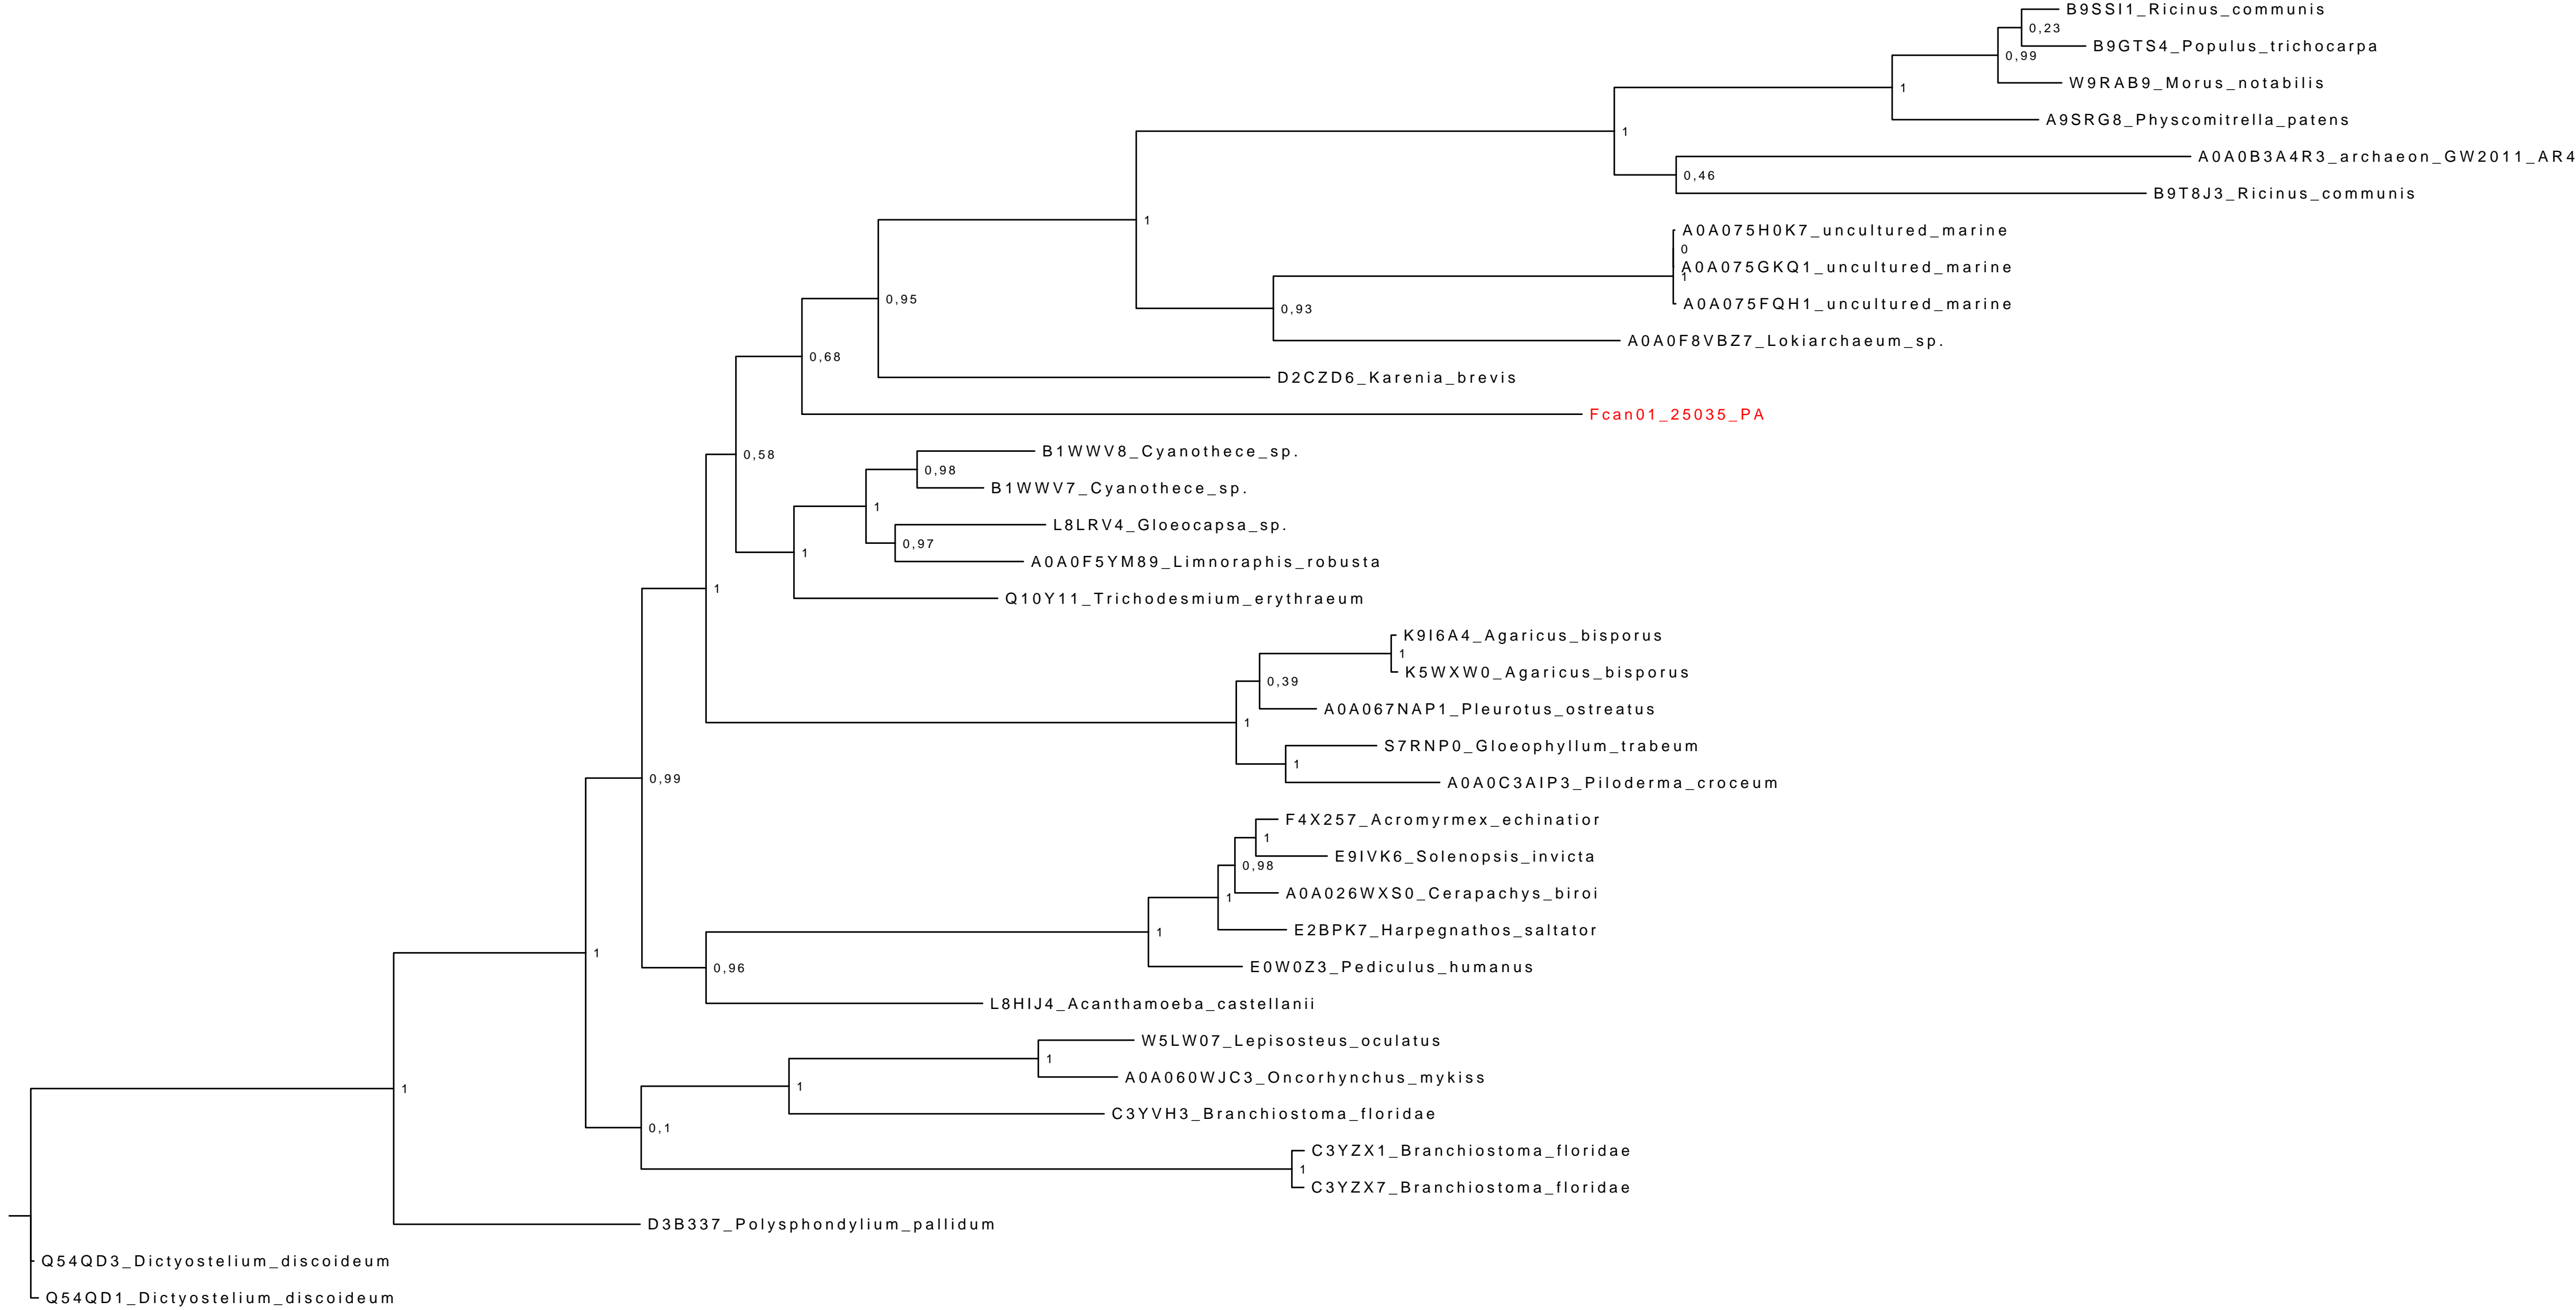

0.7

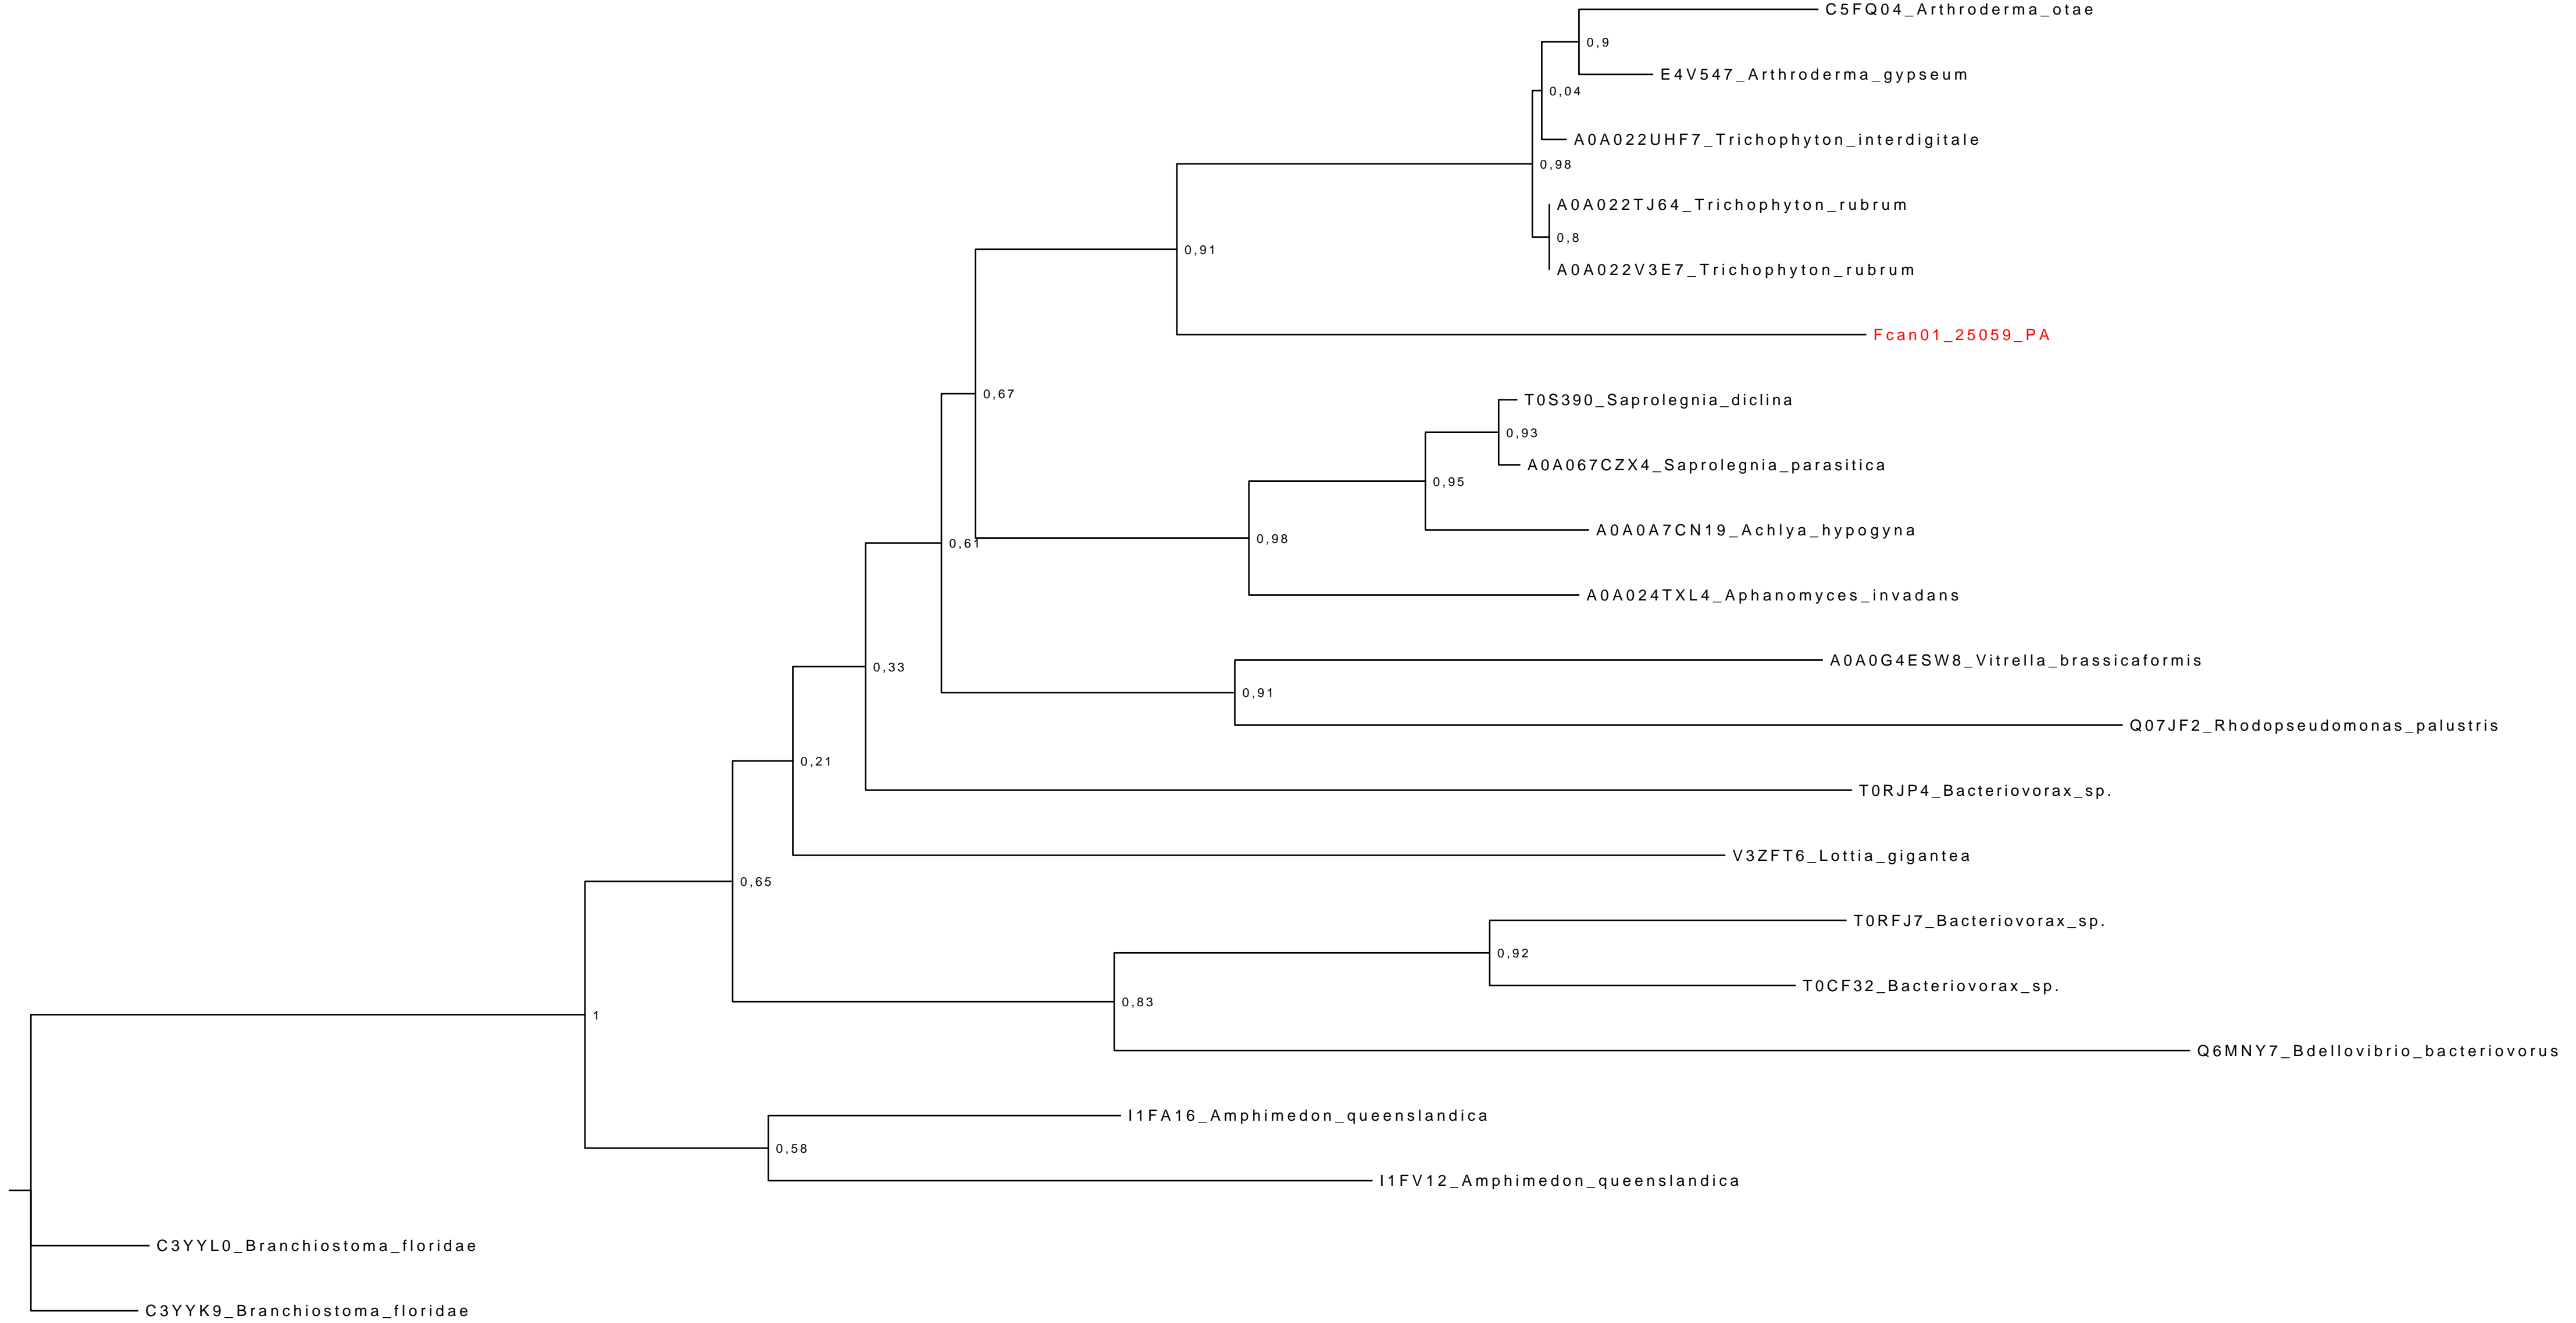

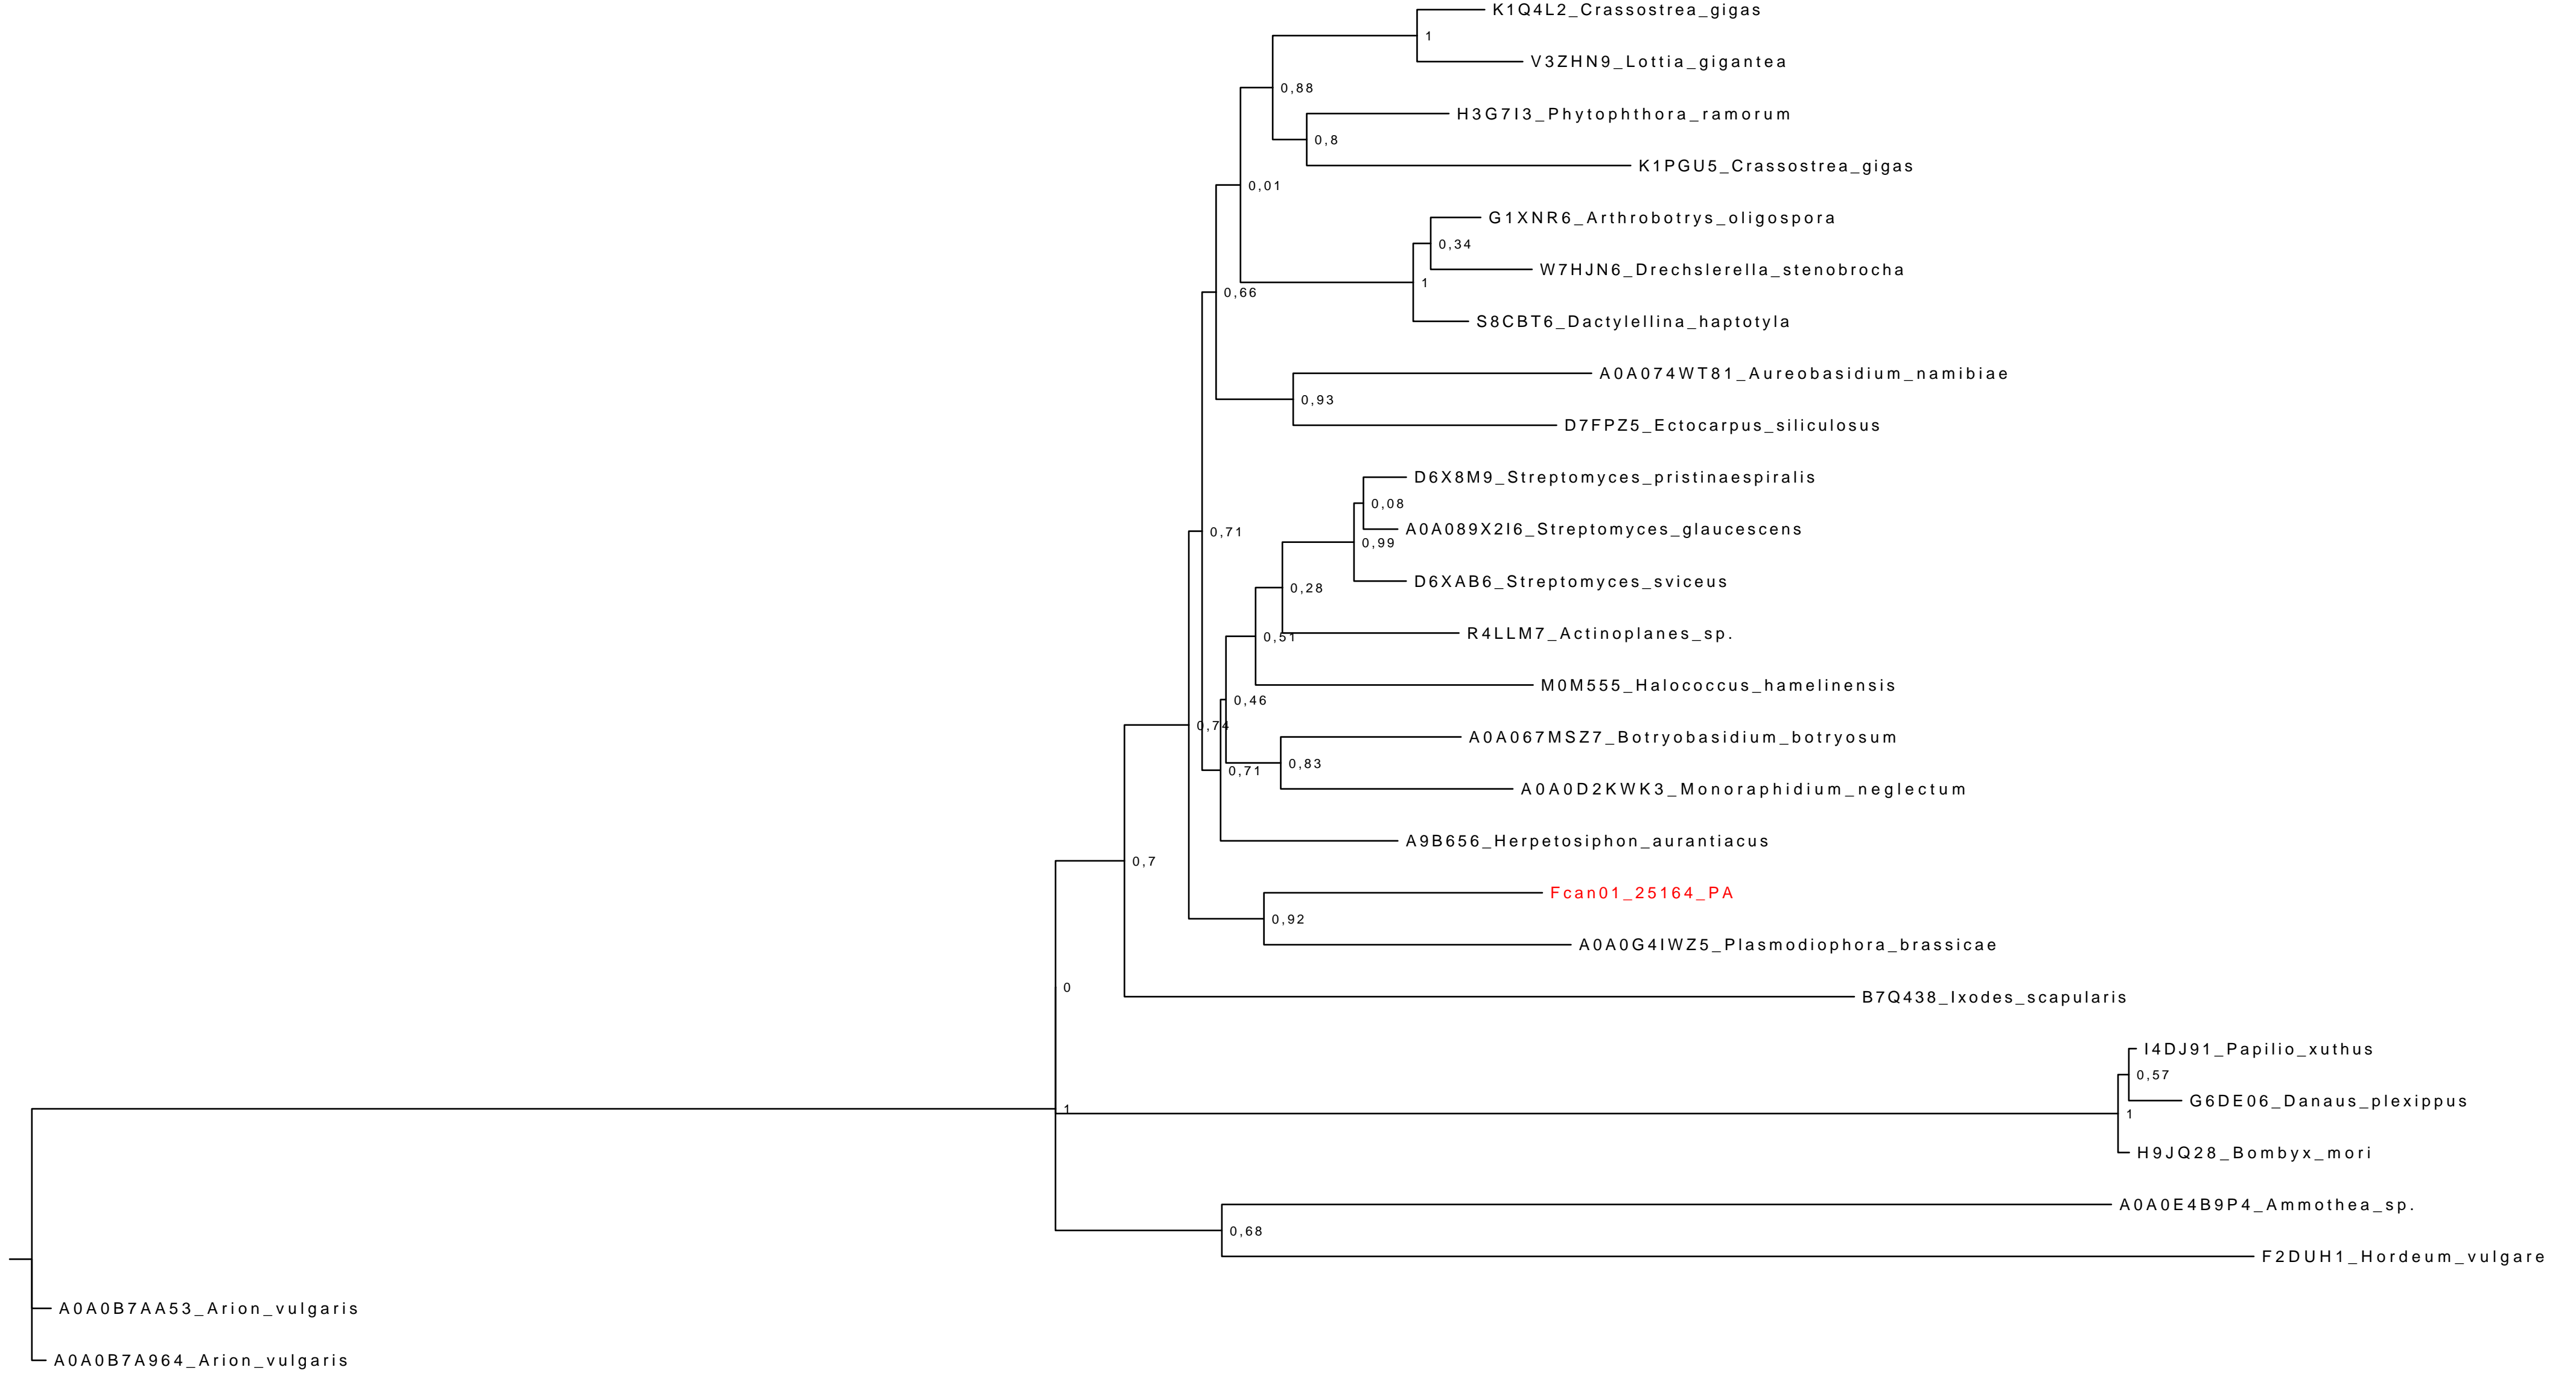

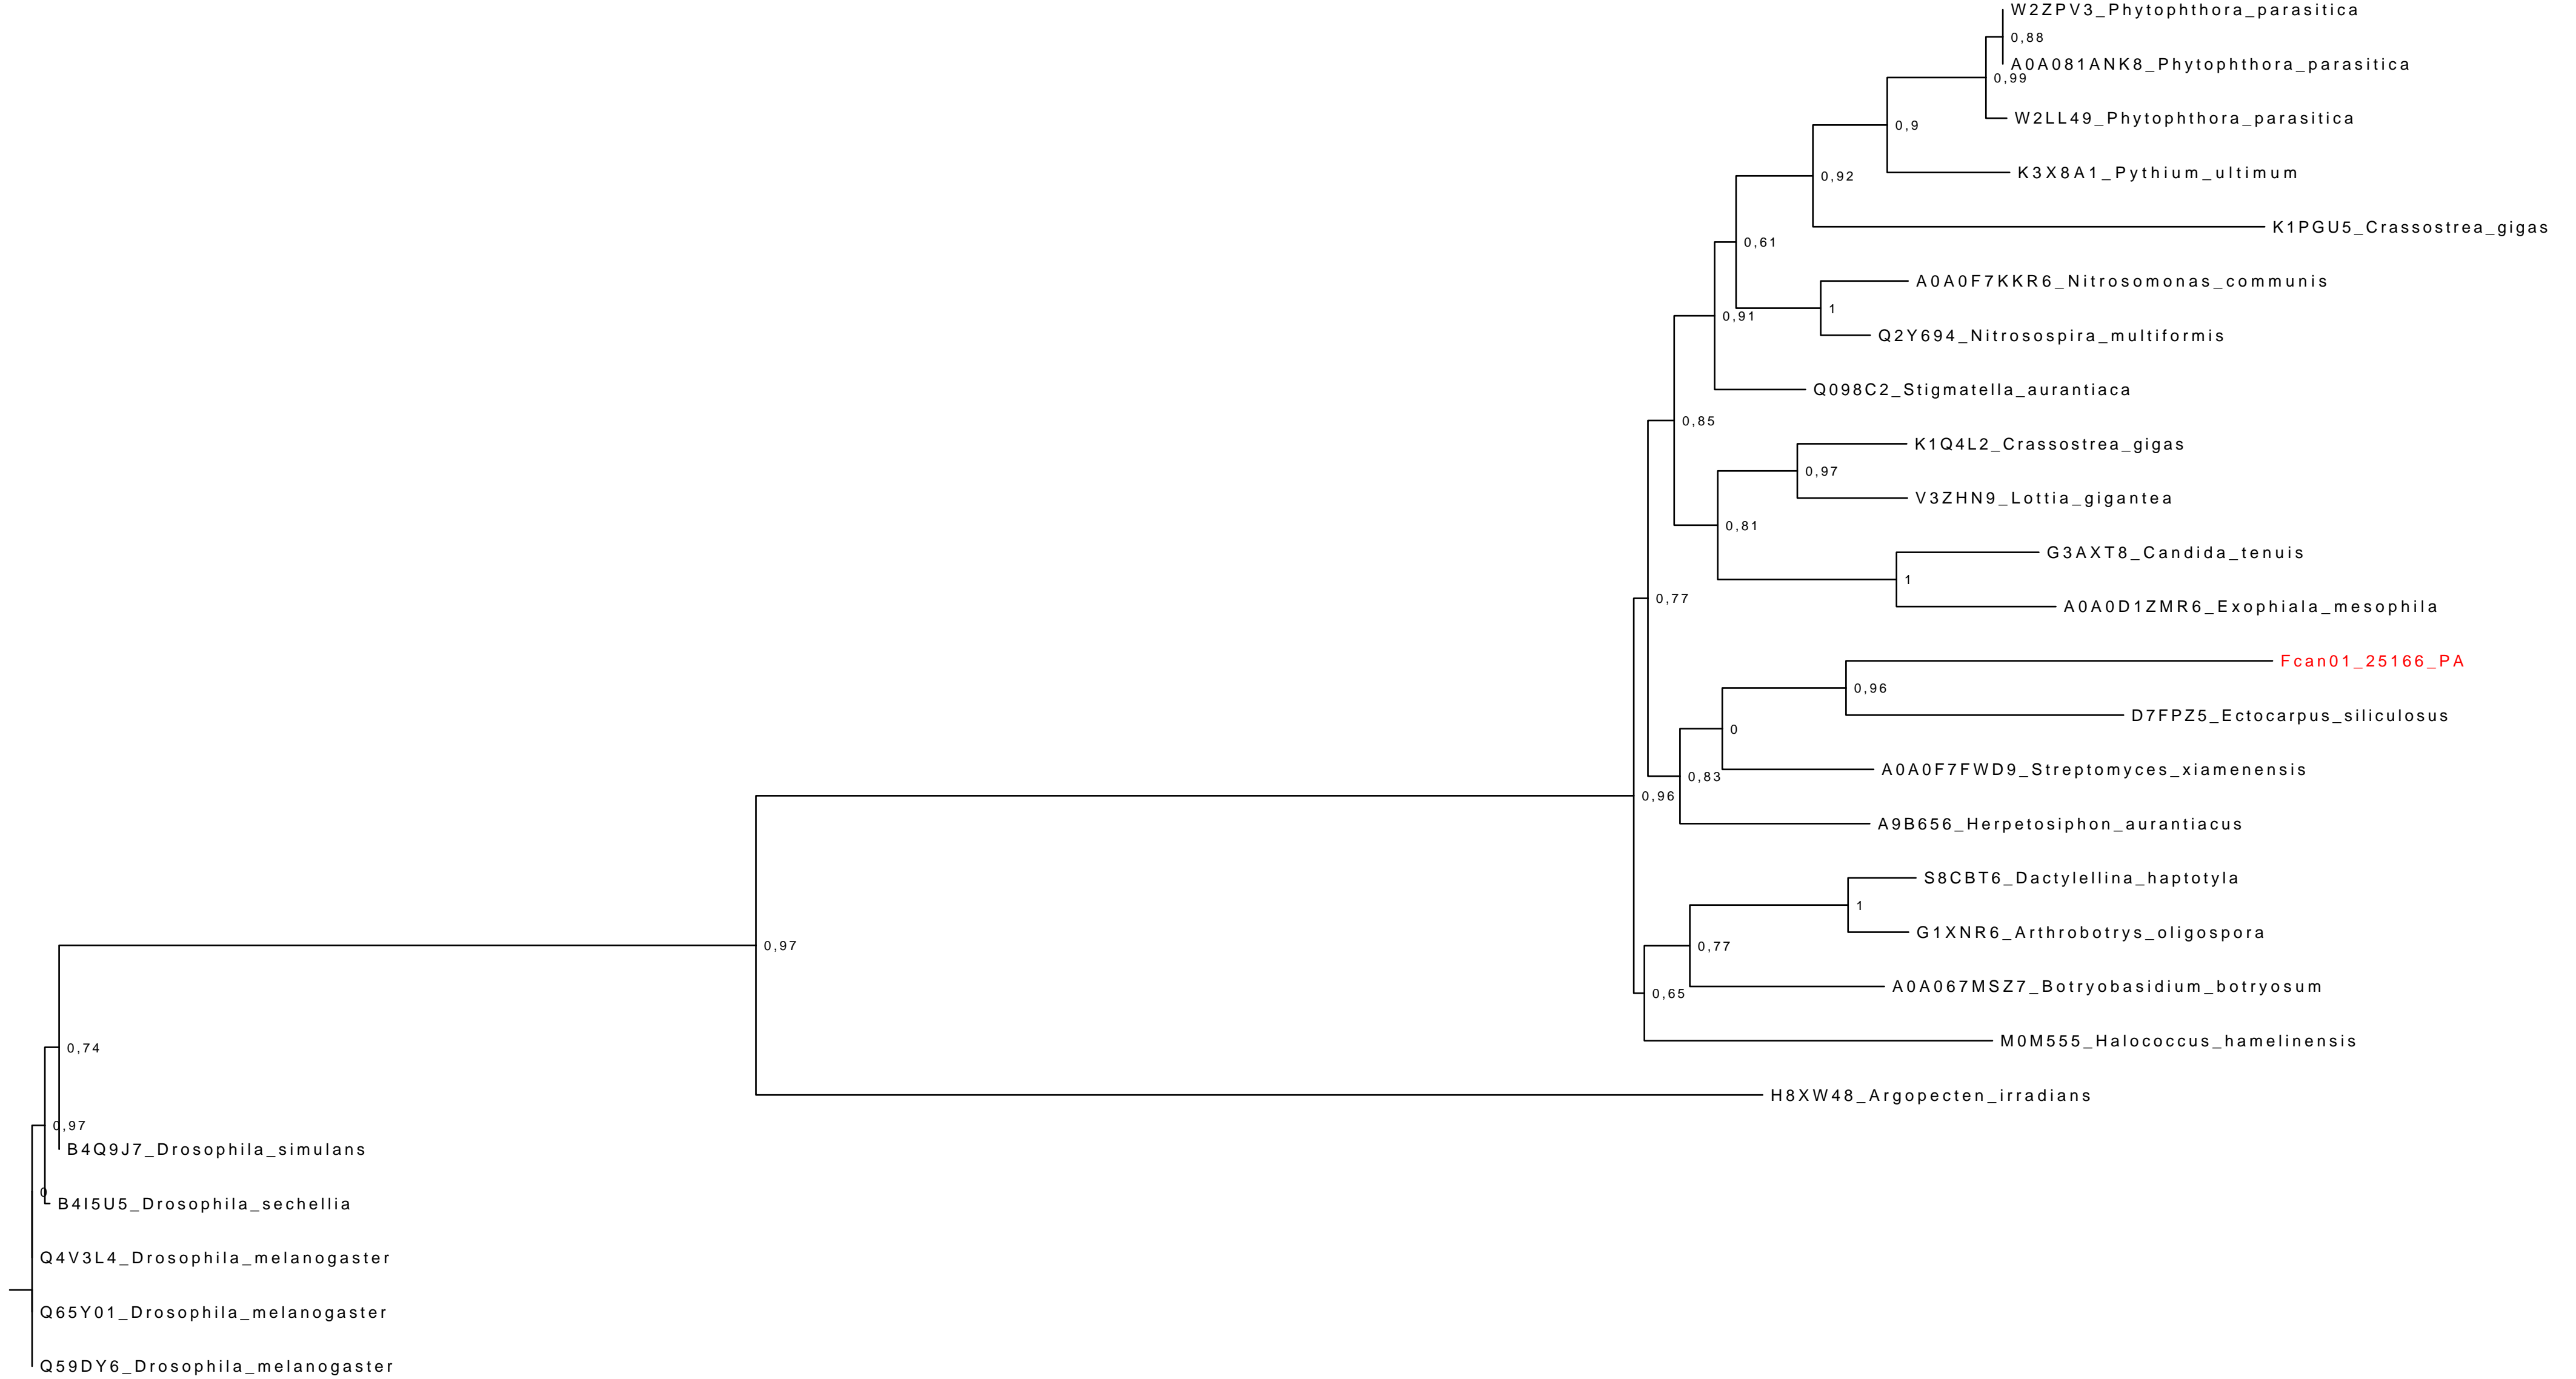

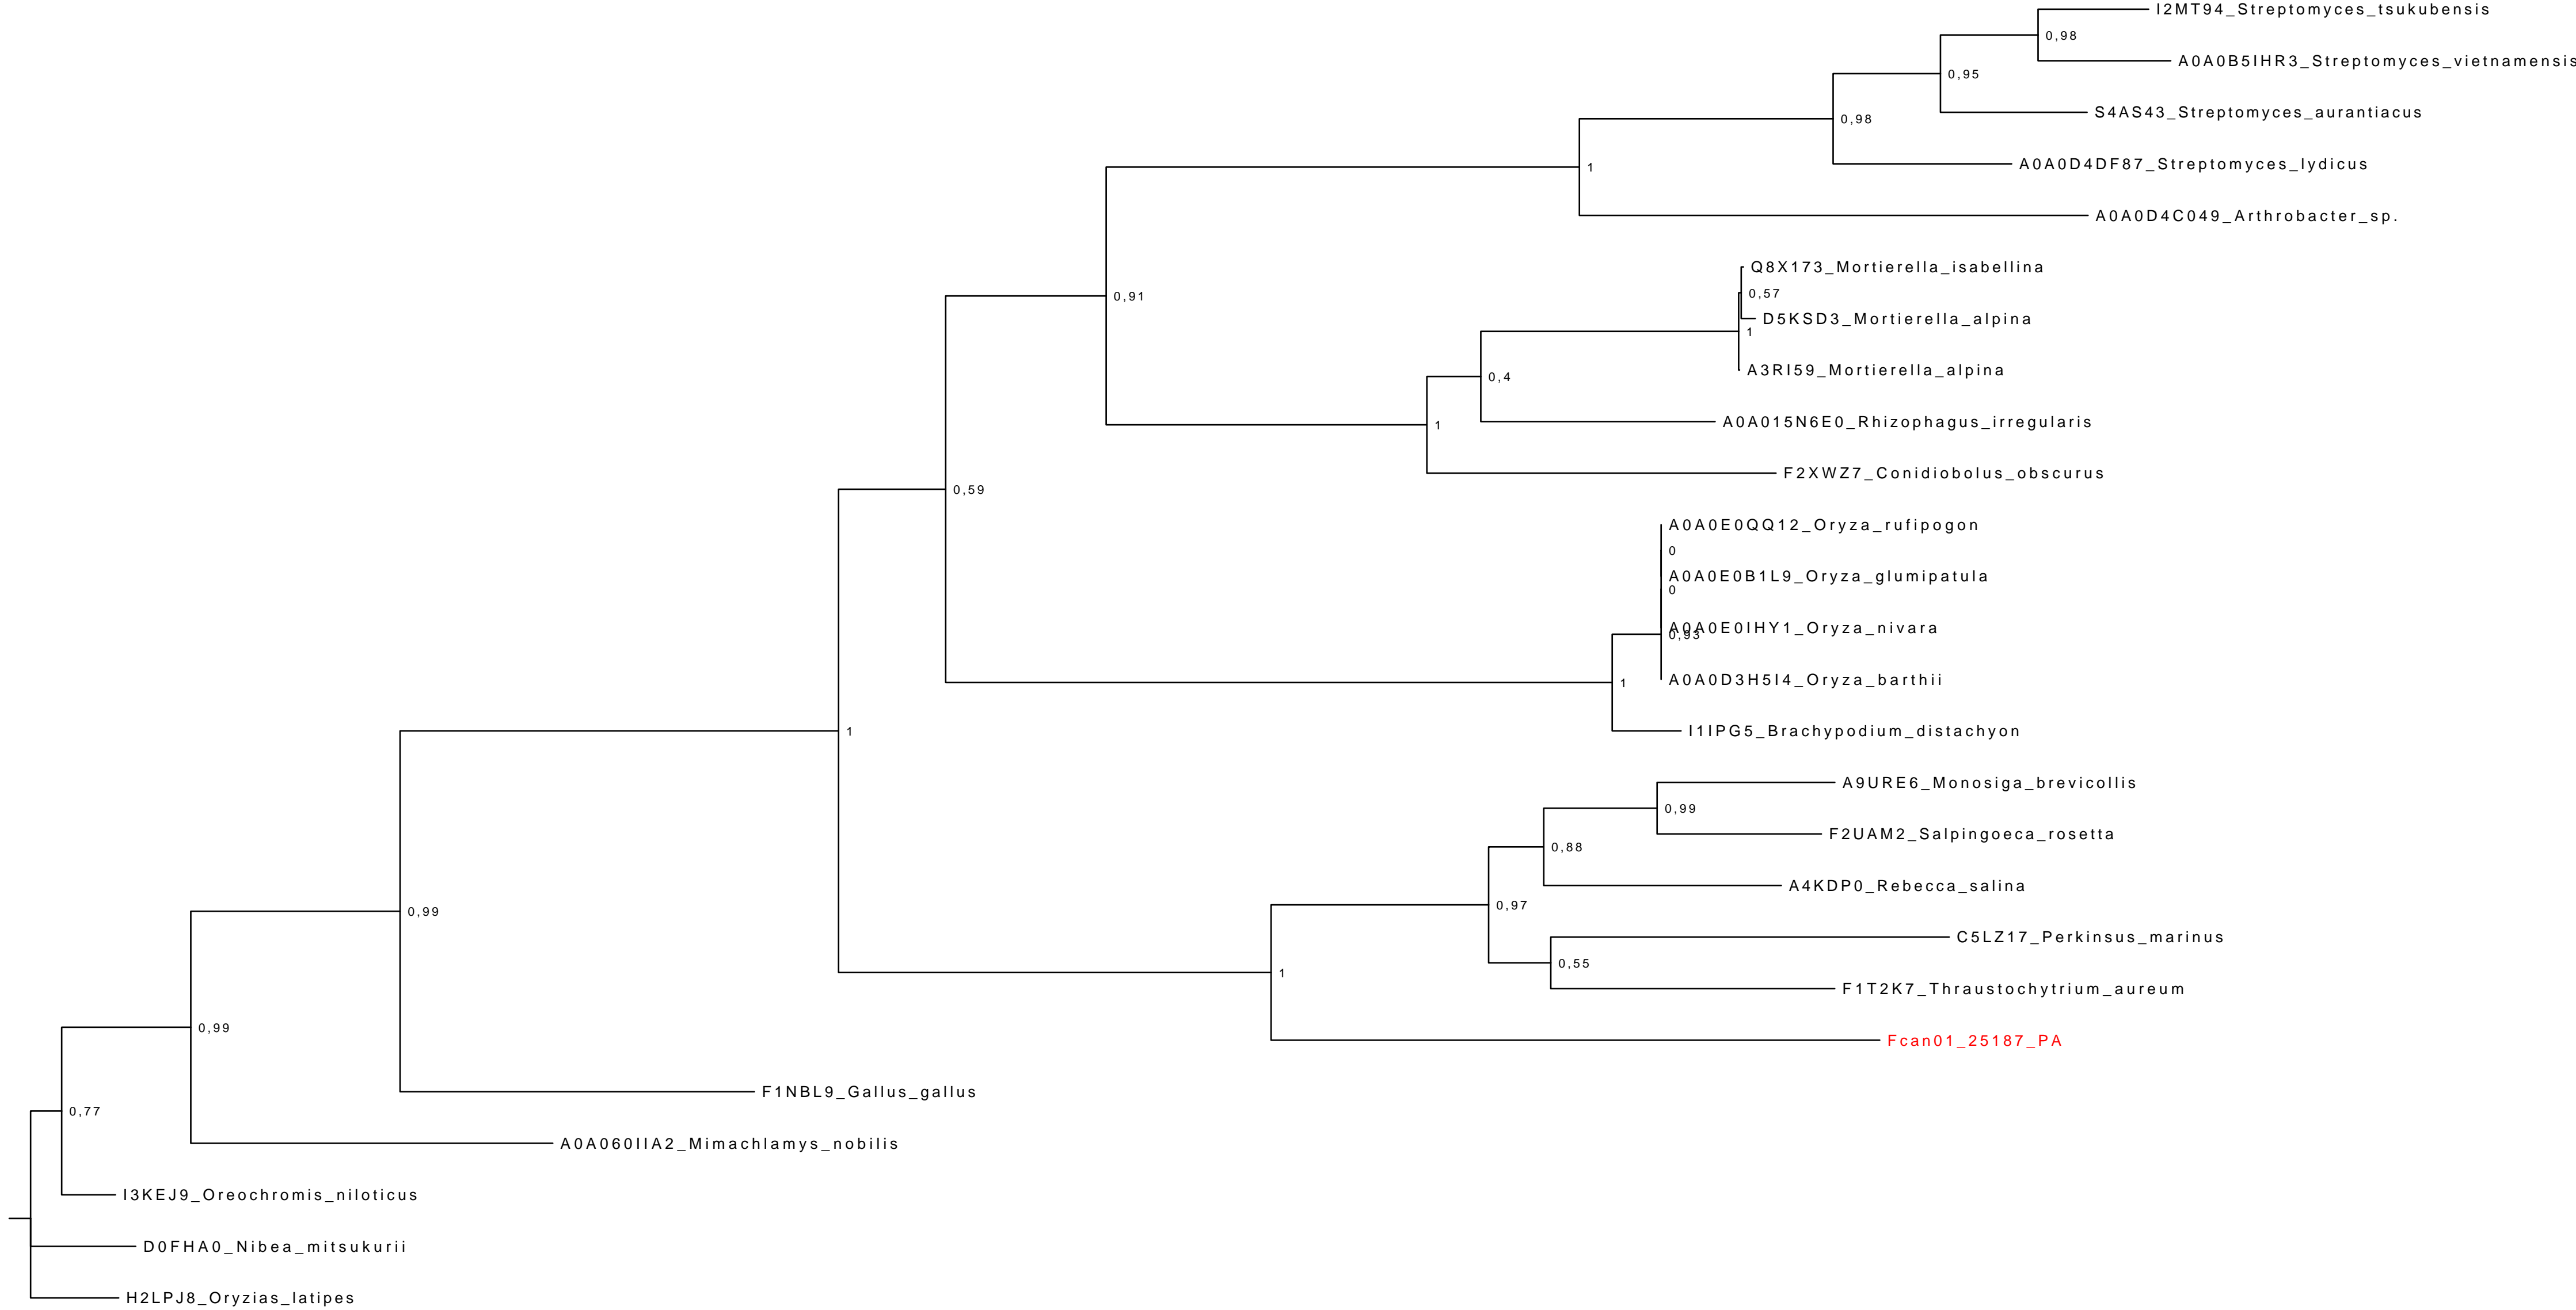

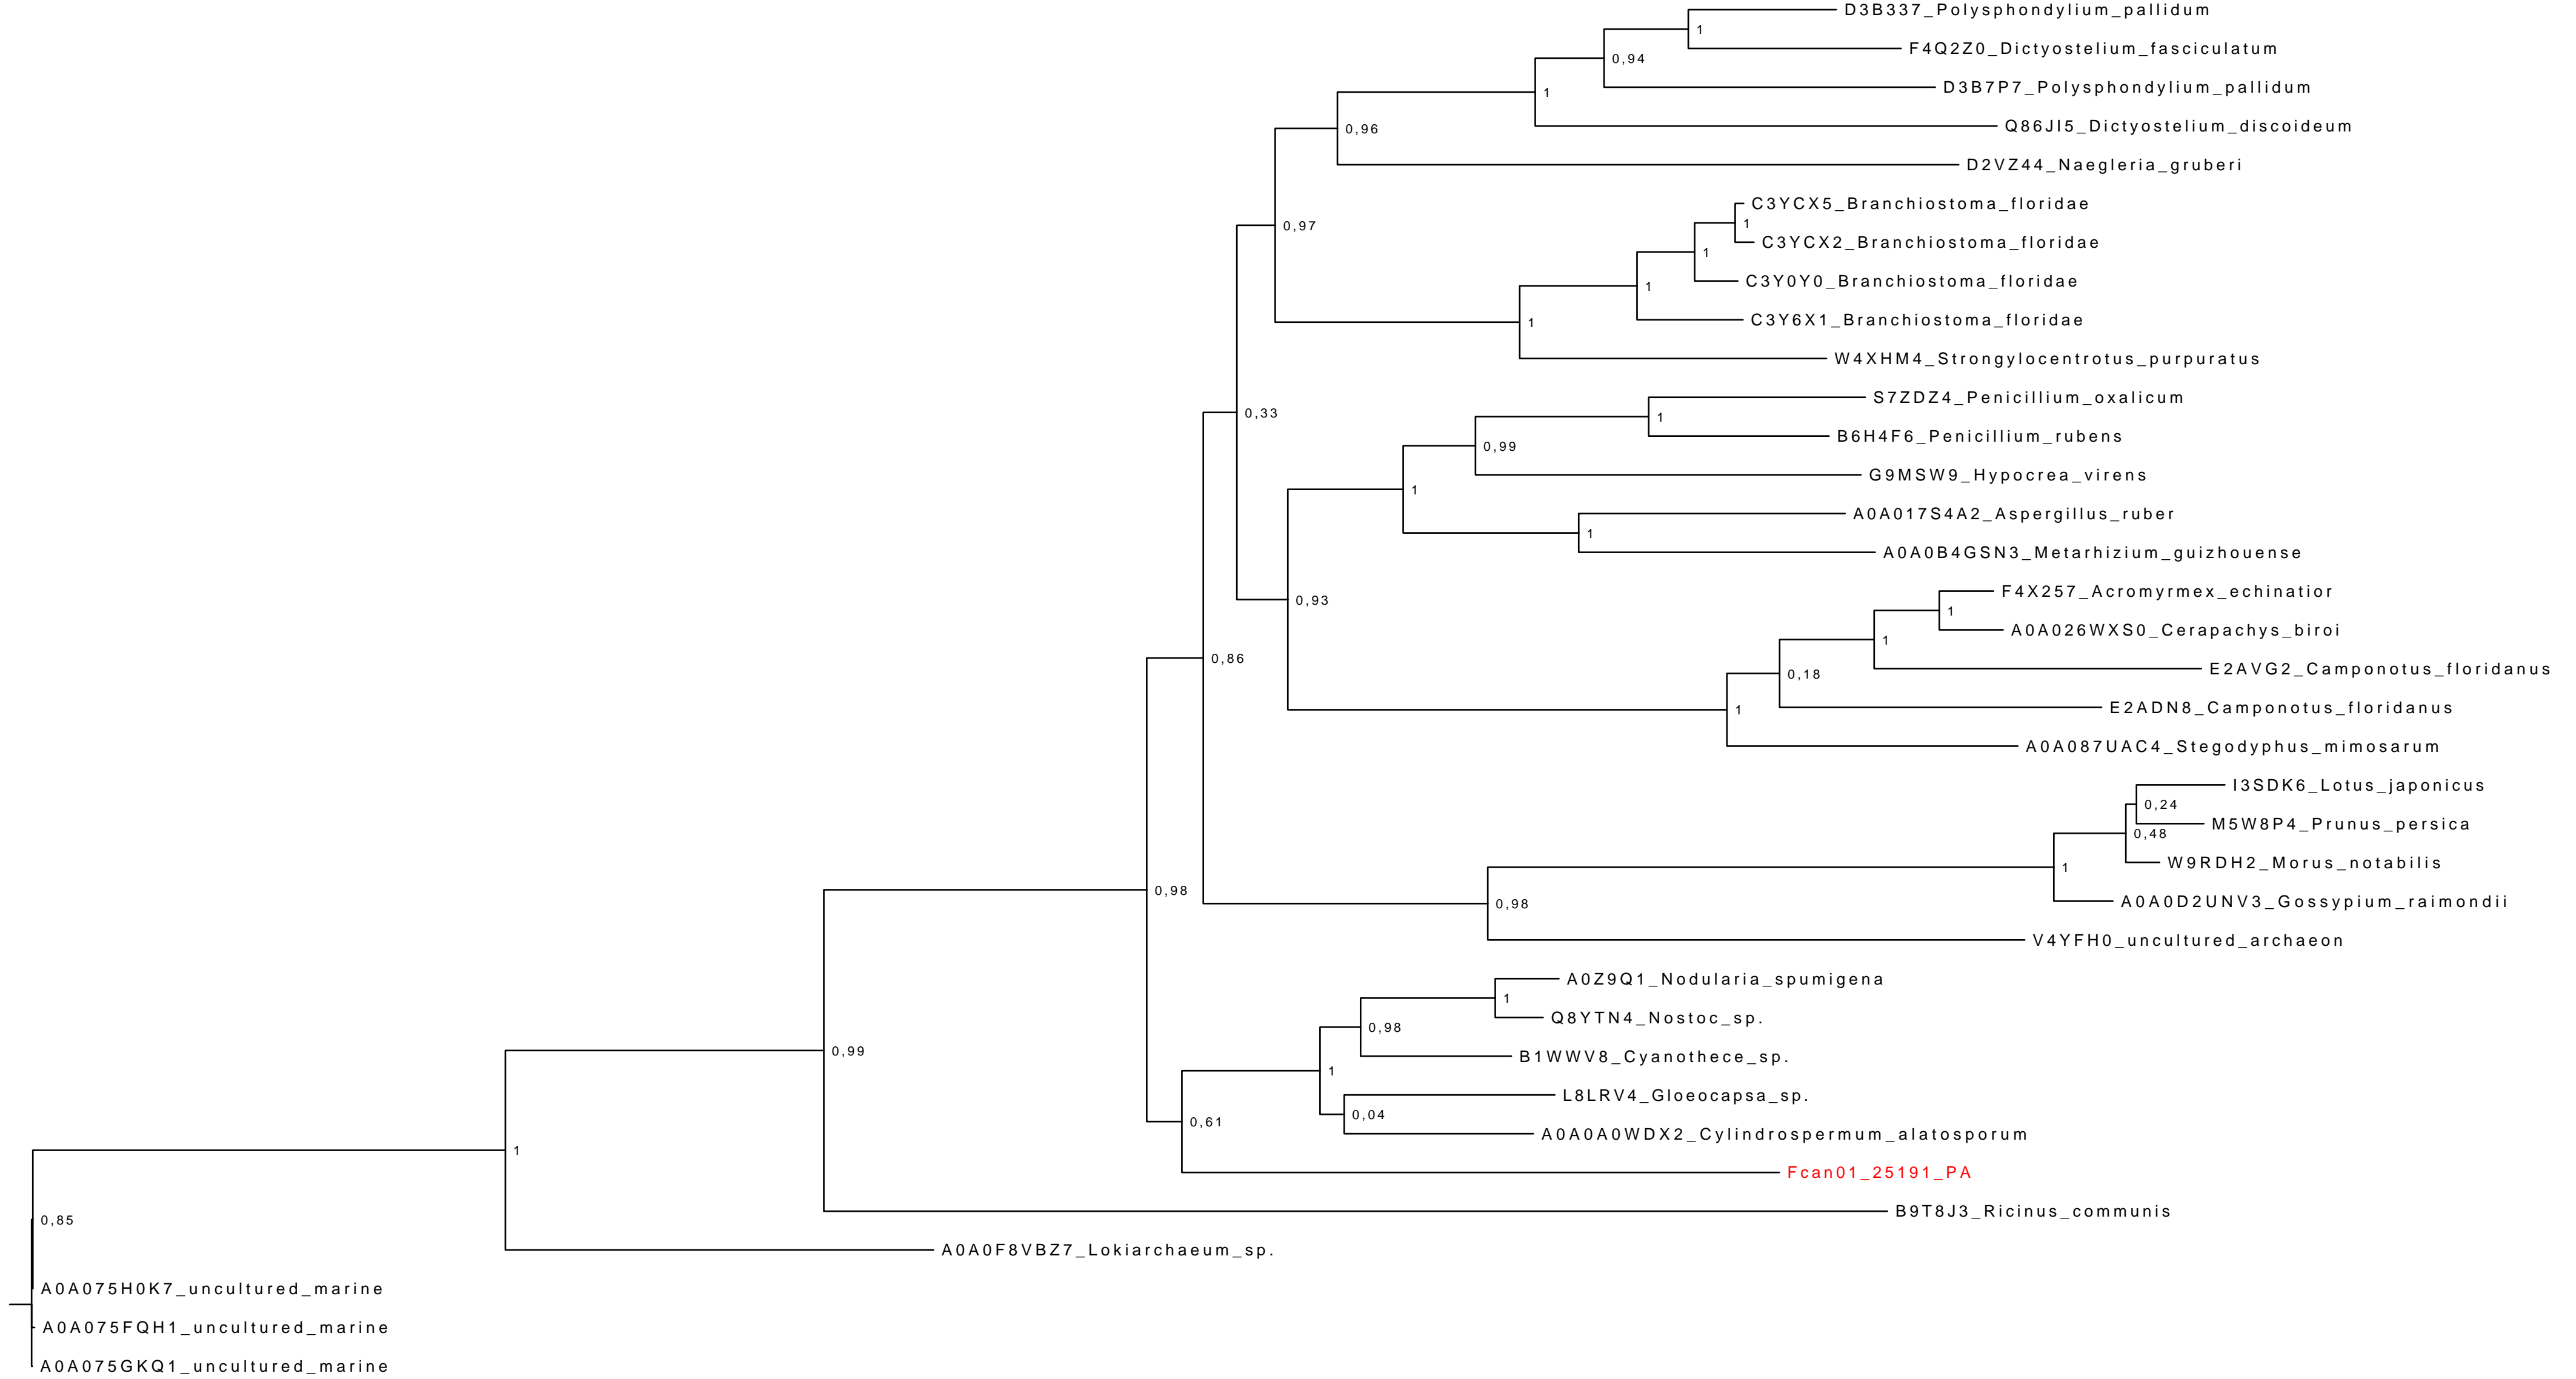



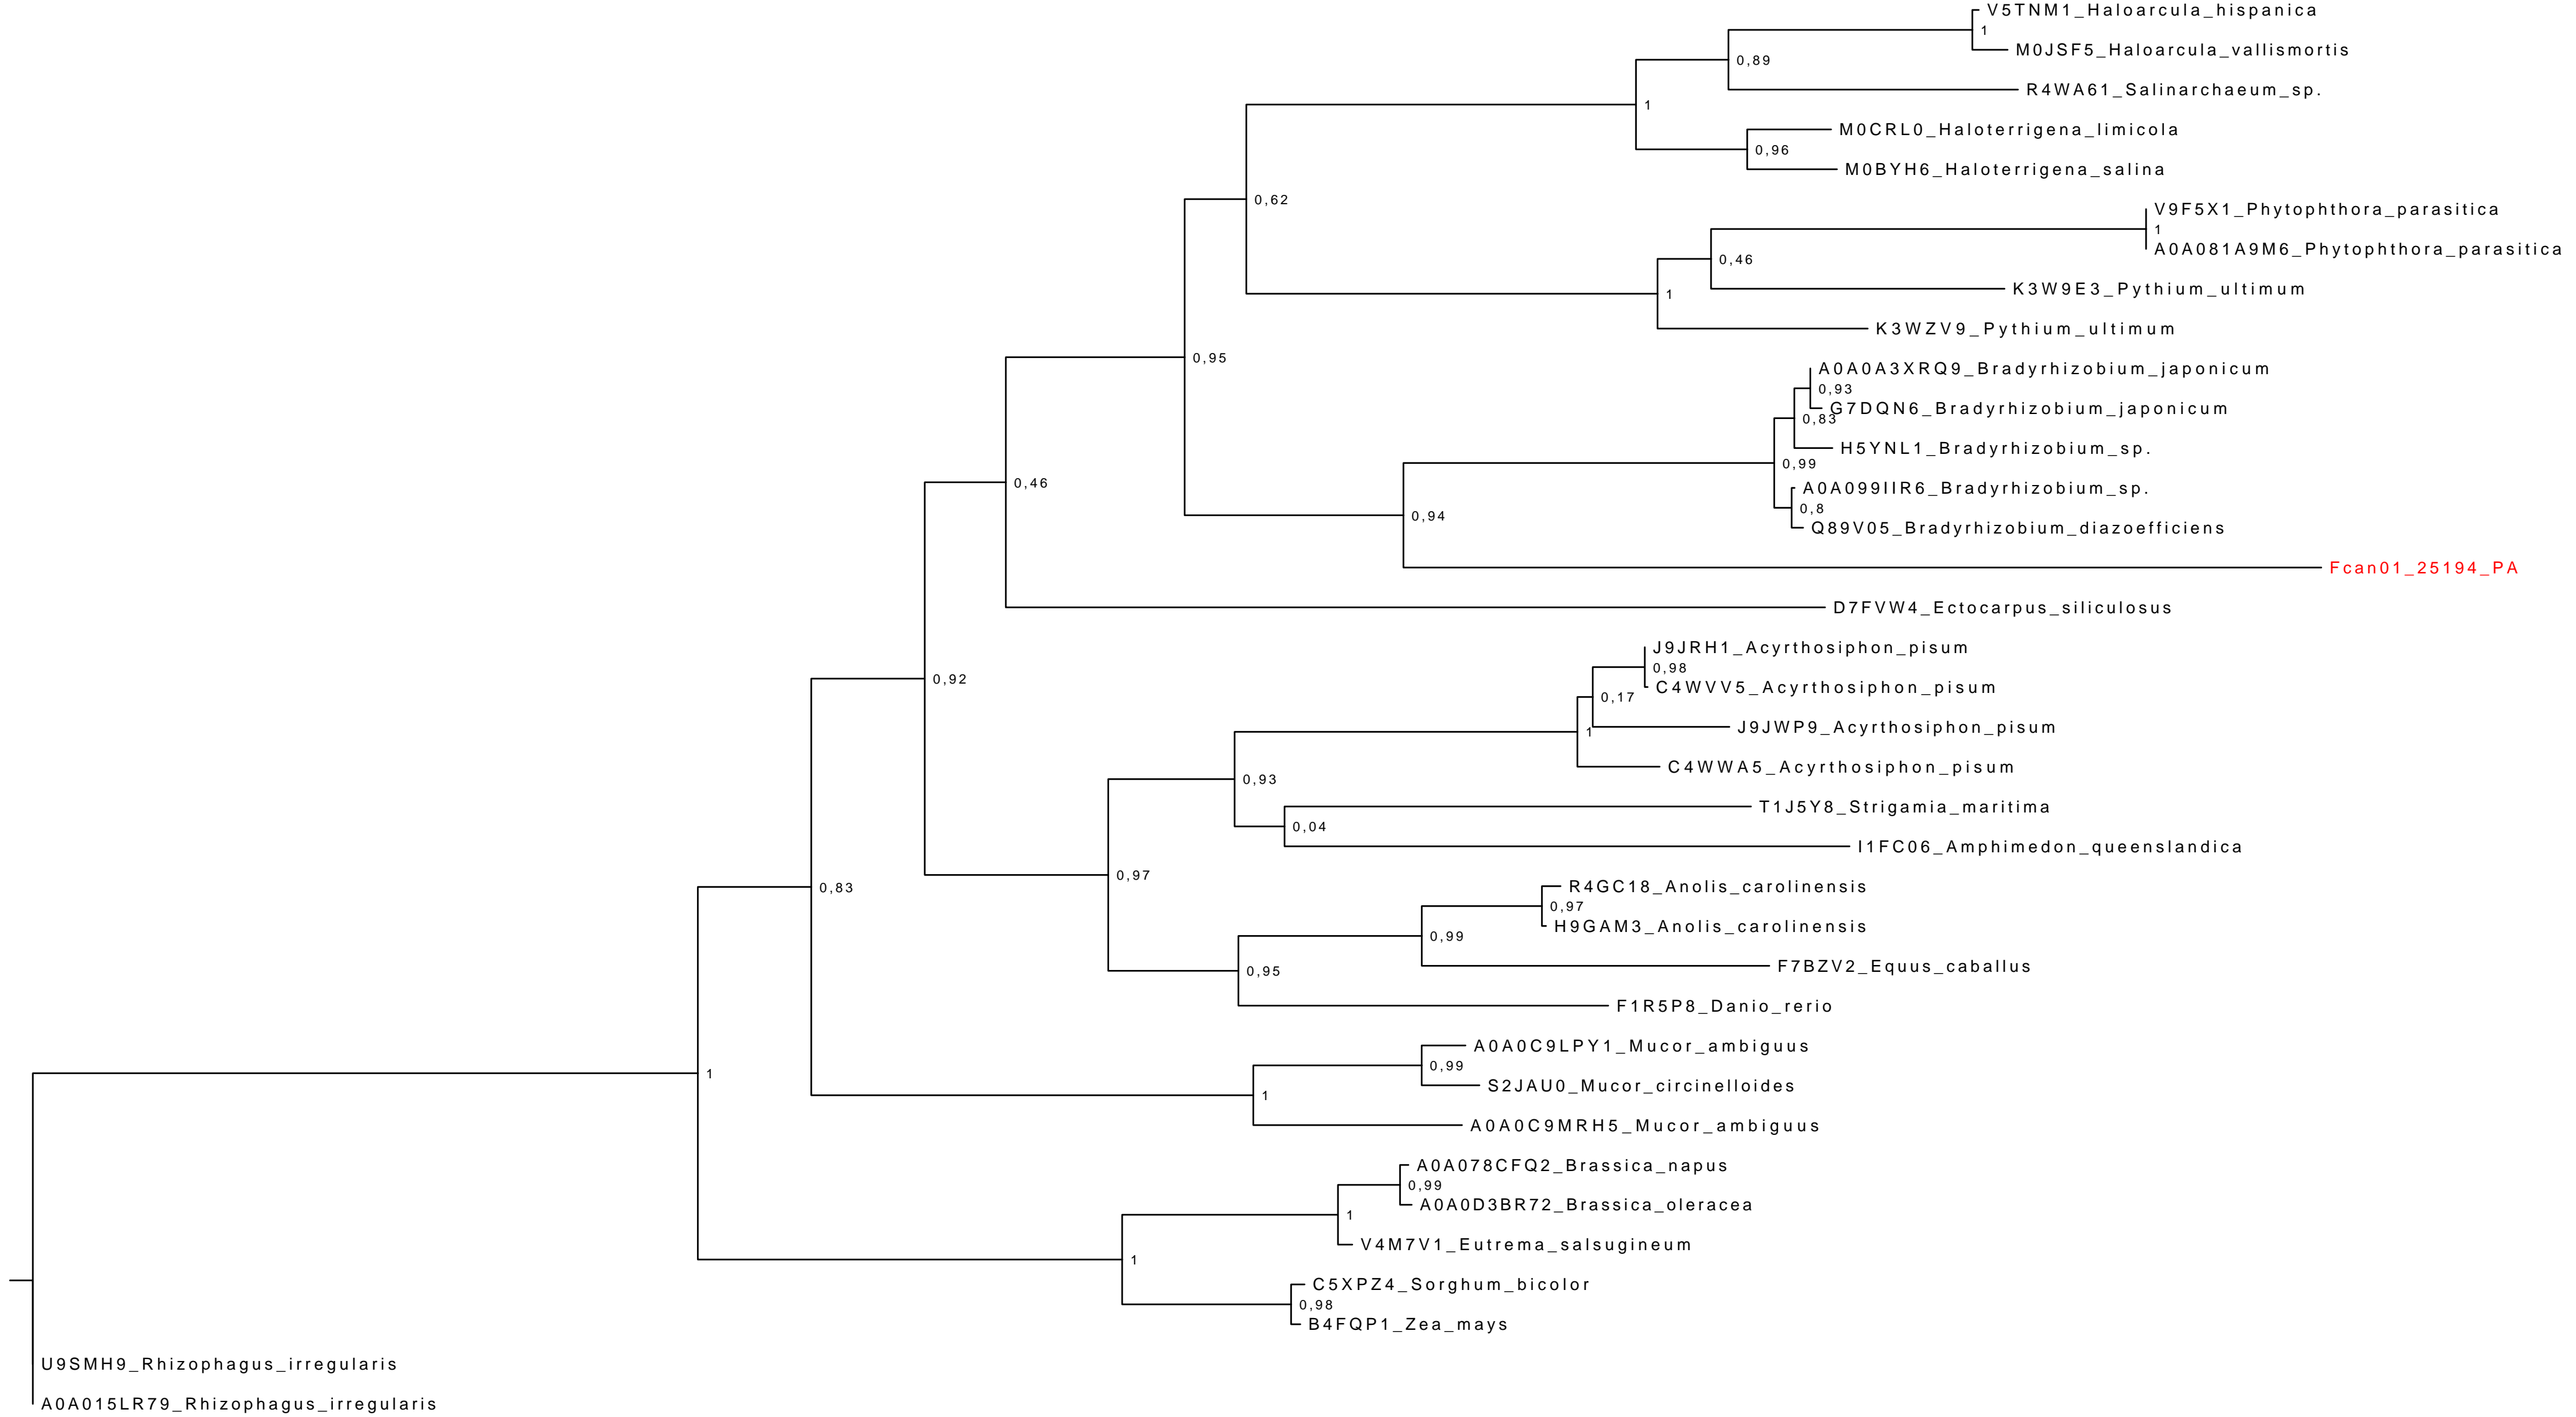

0.3

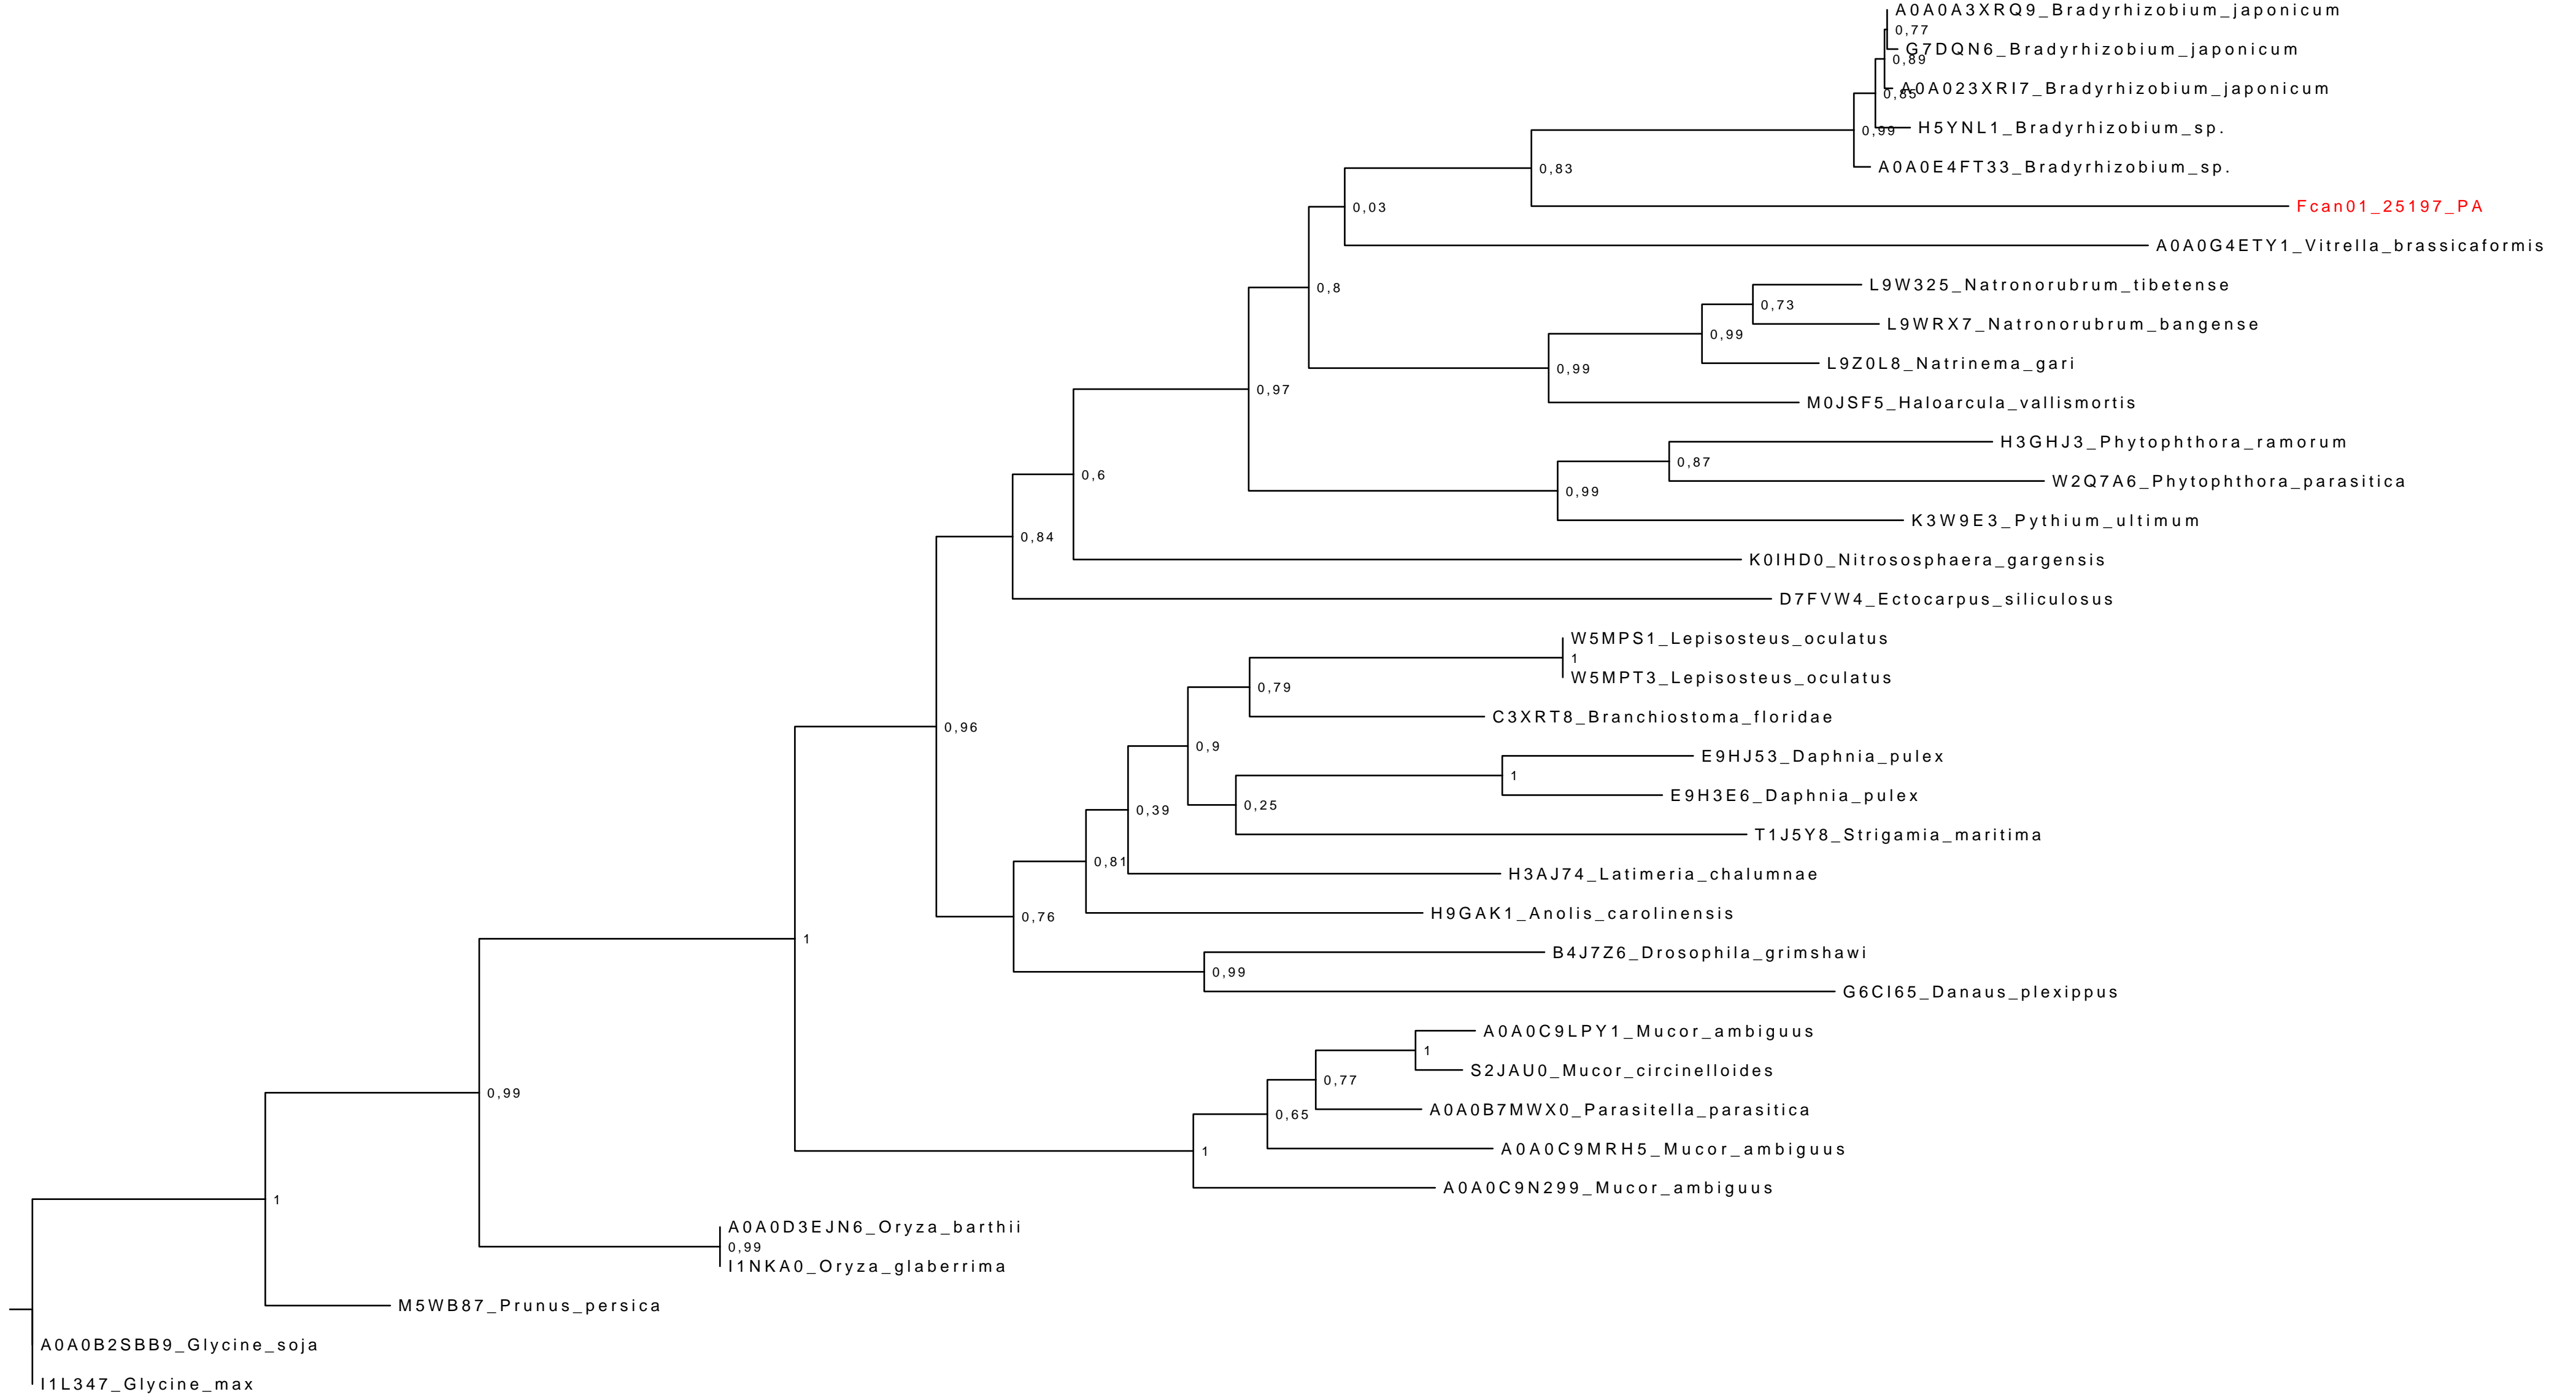

0.3

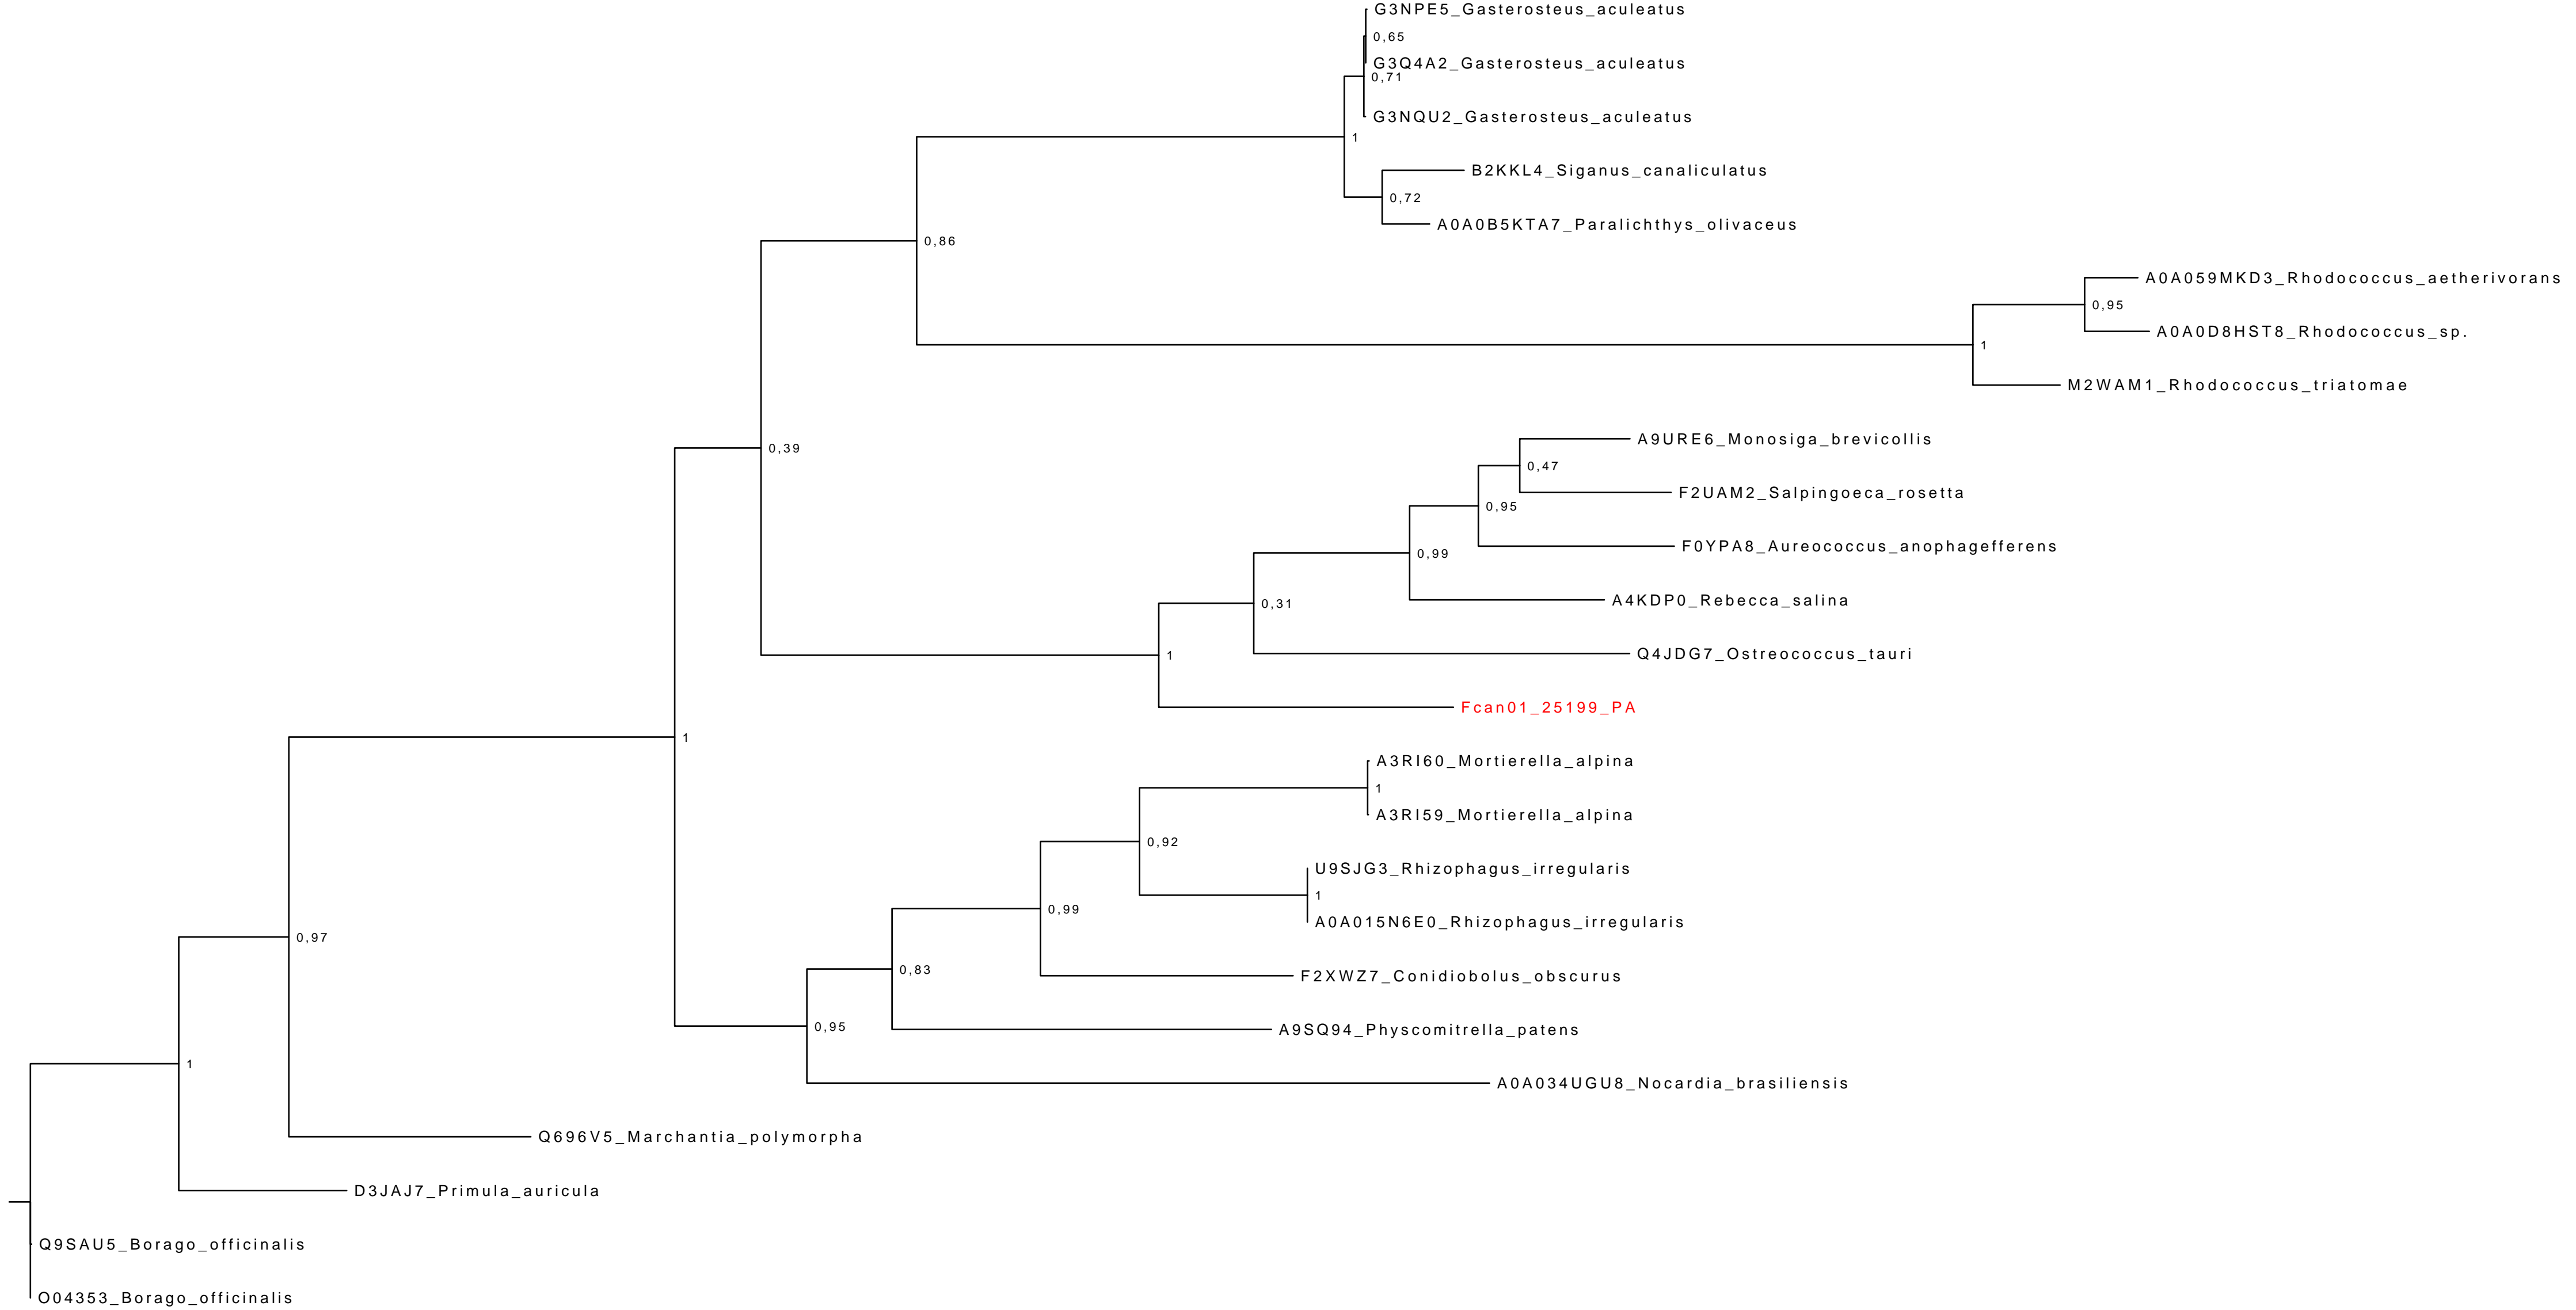

0.5

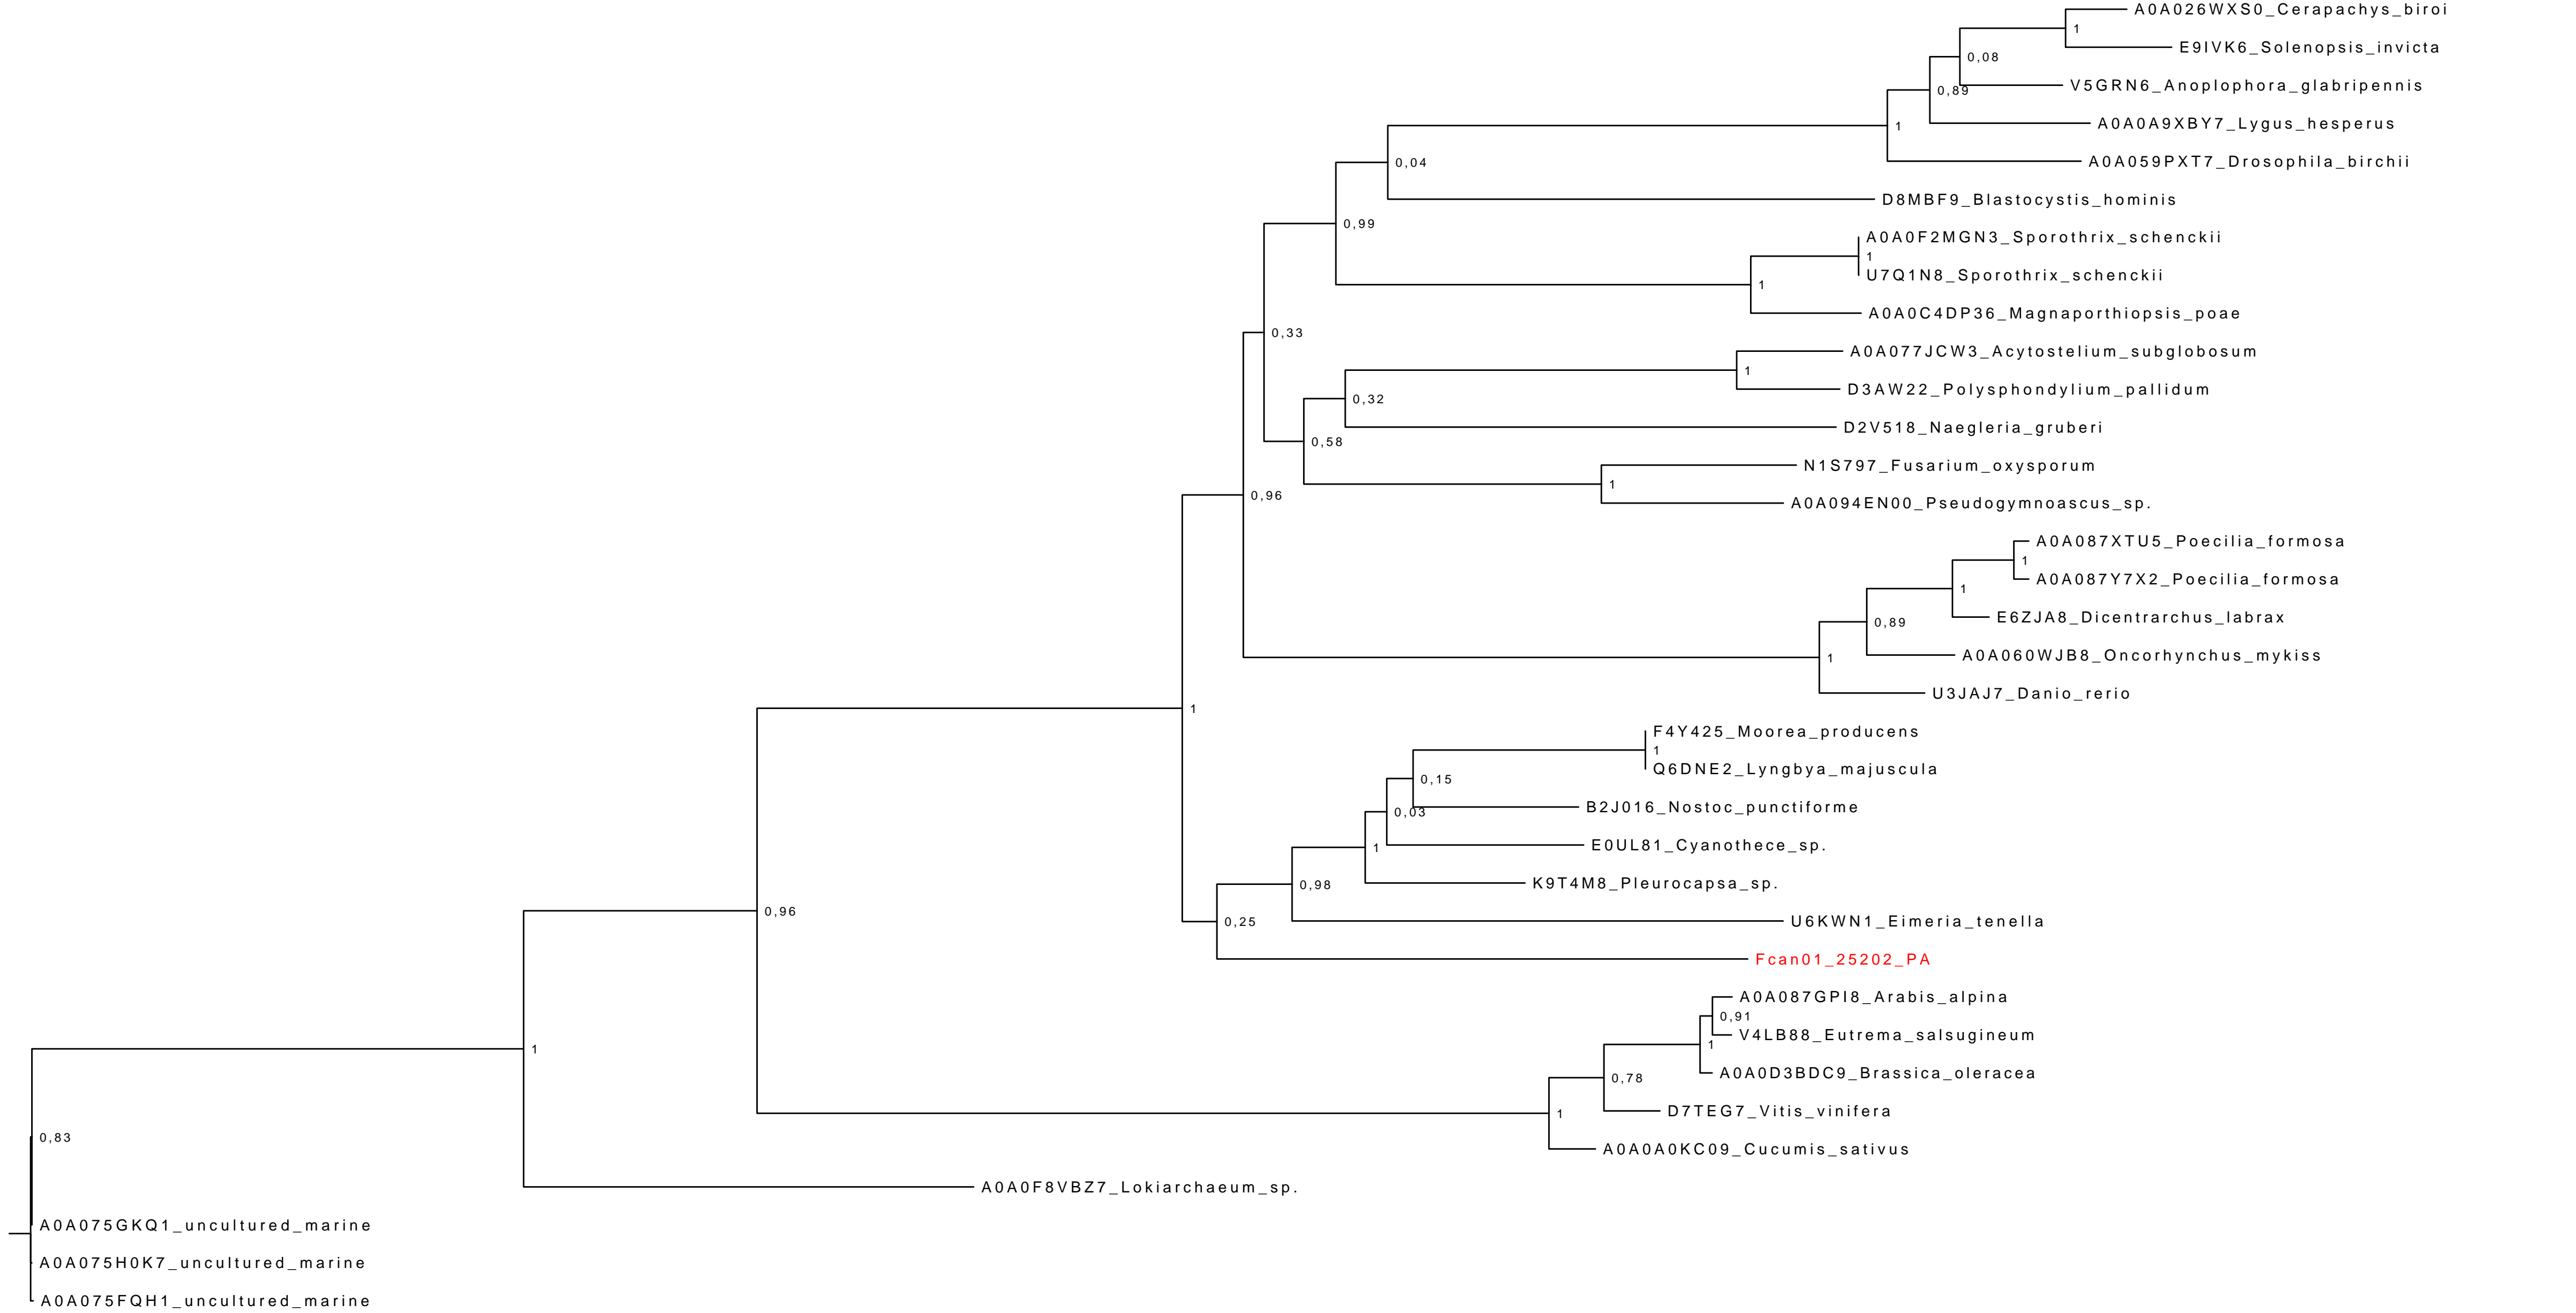

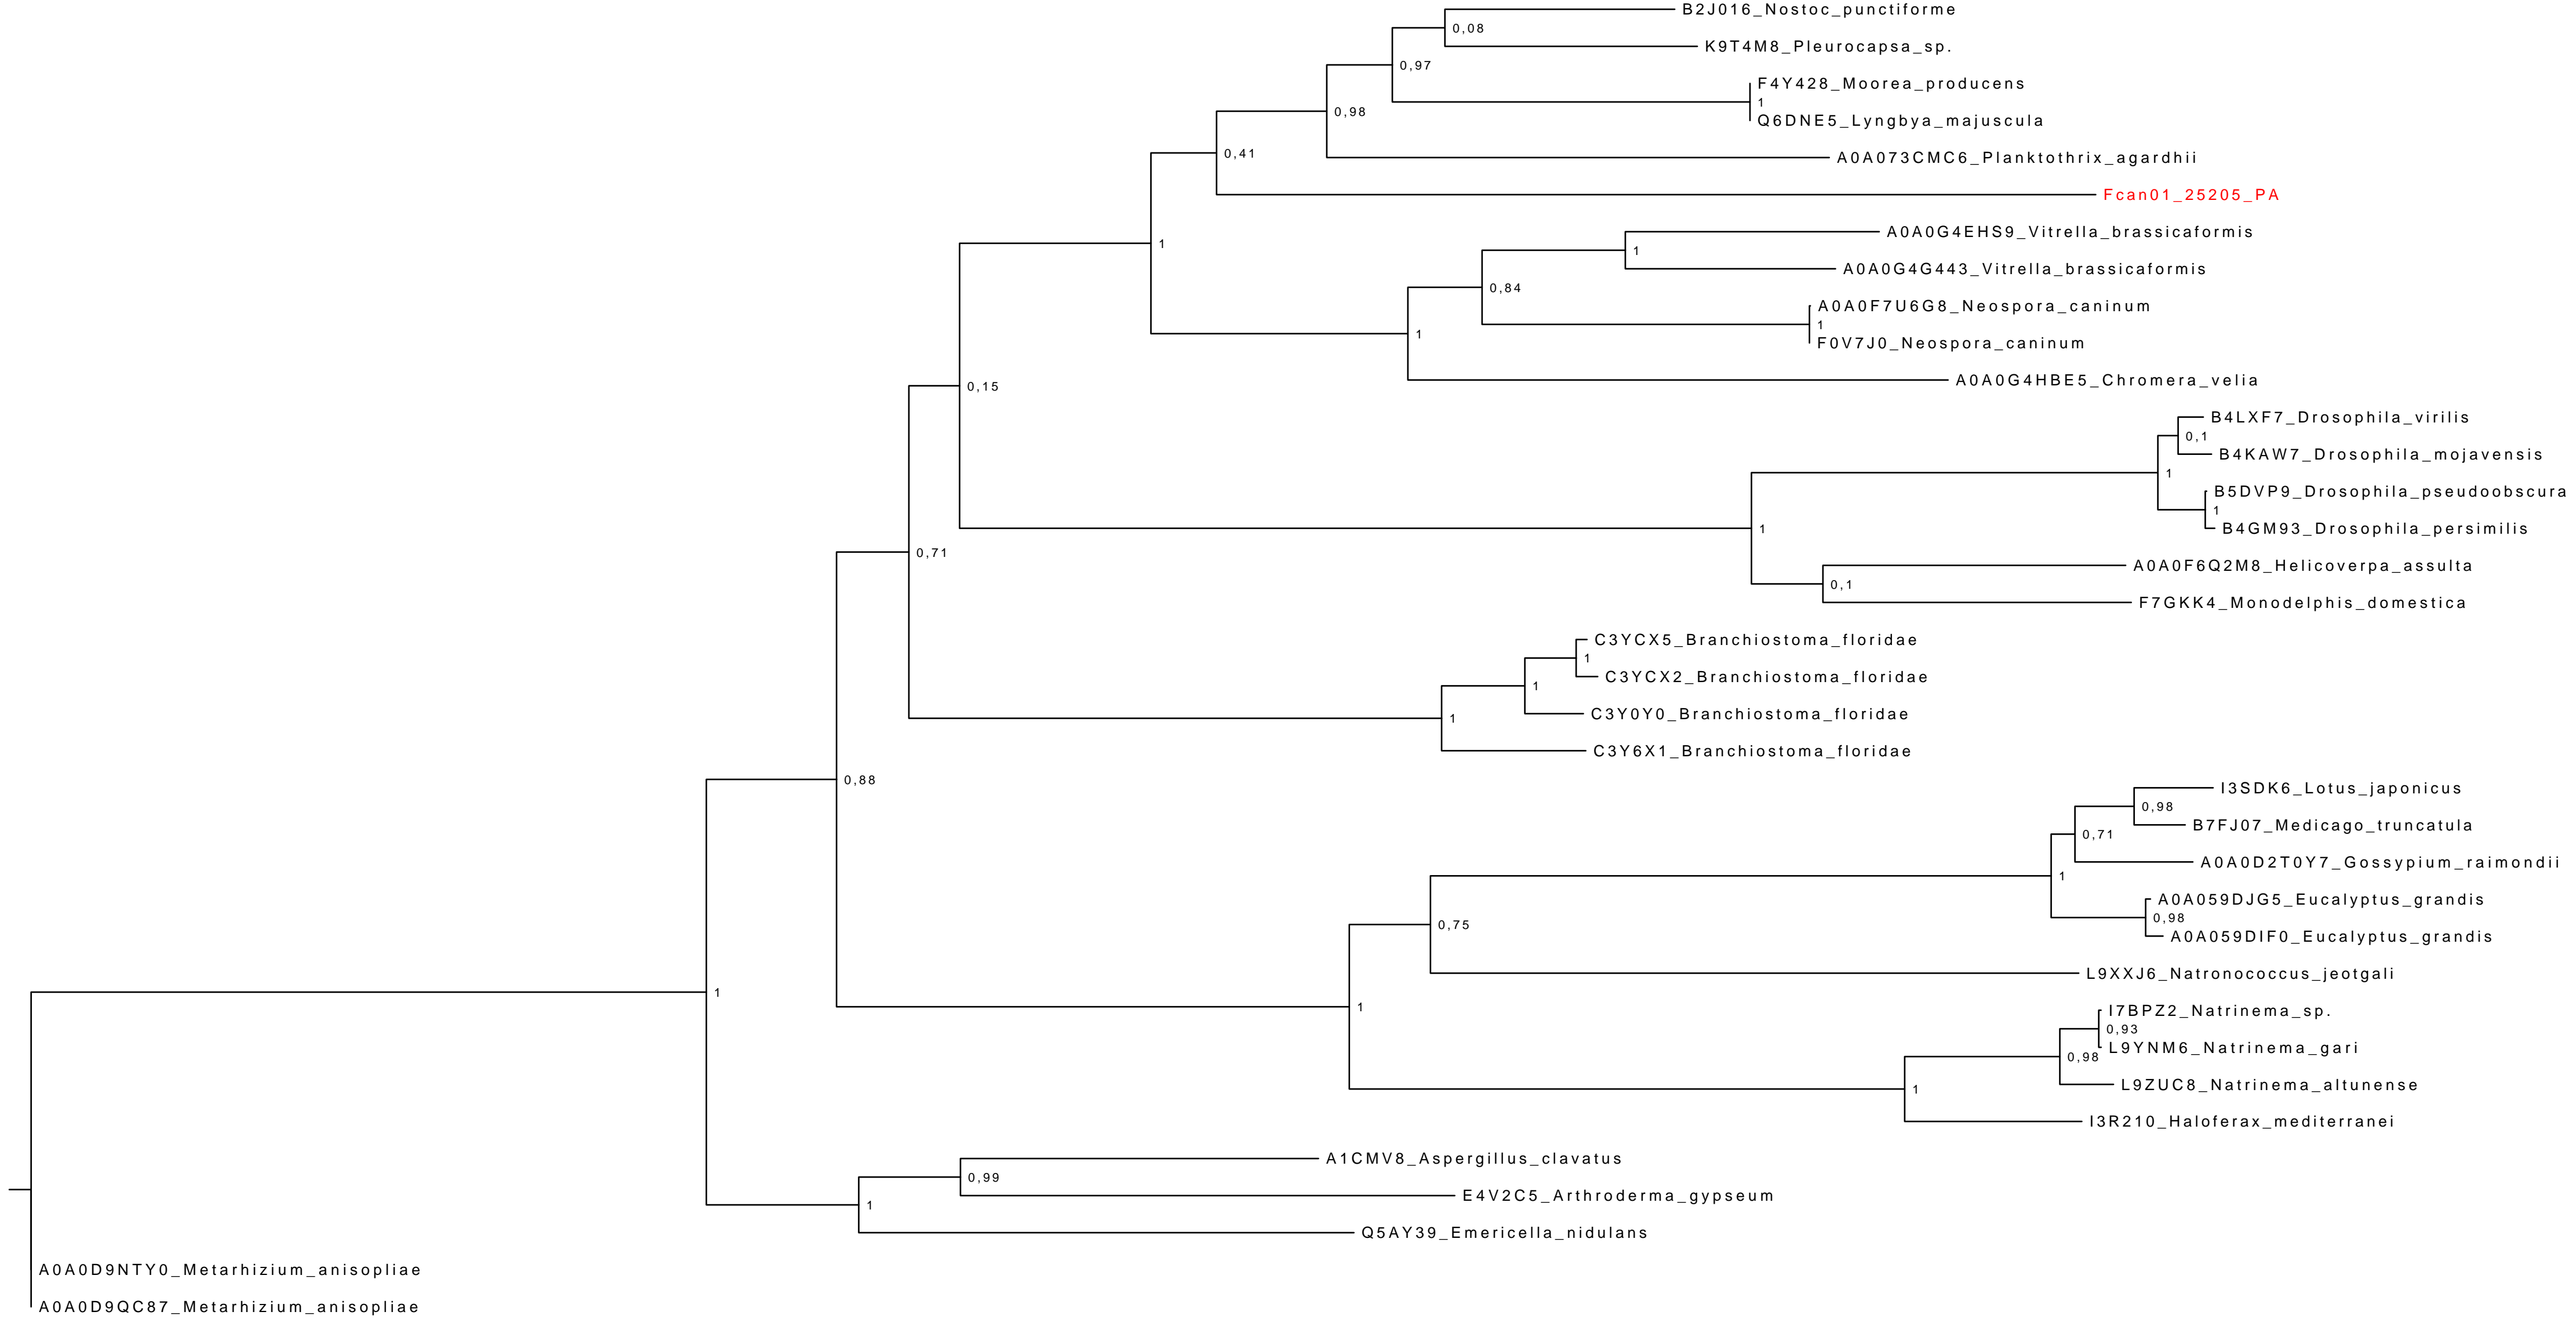

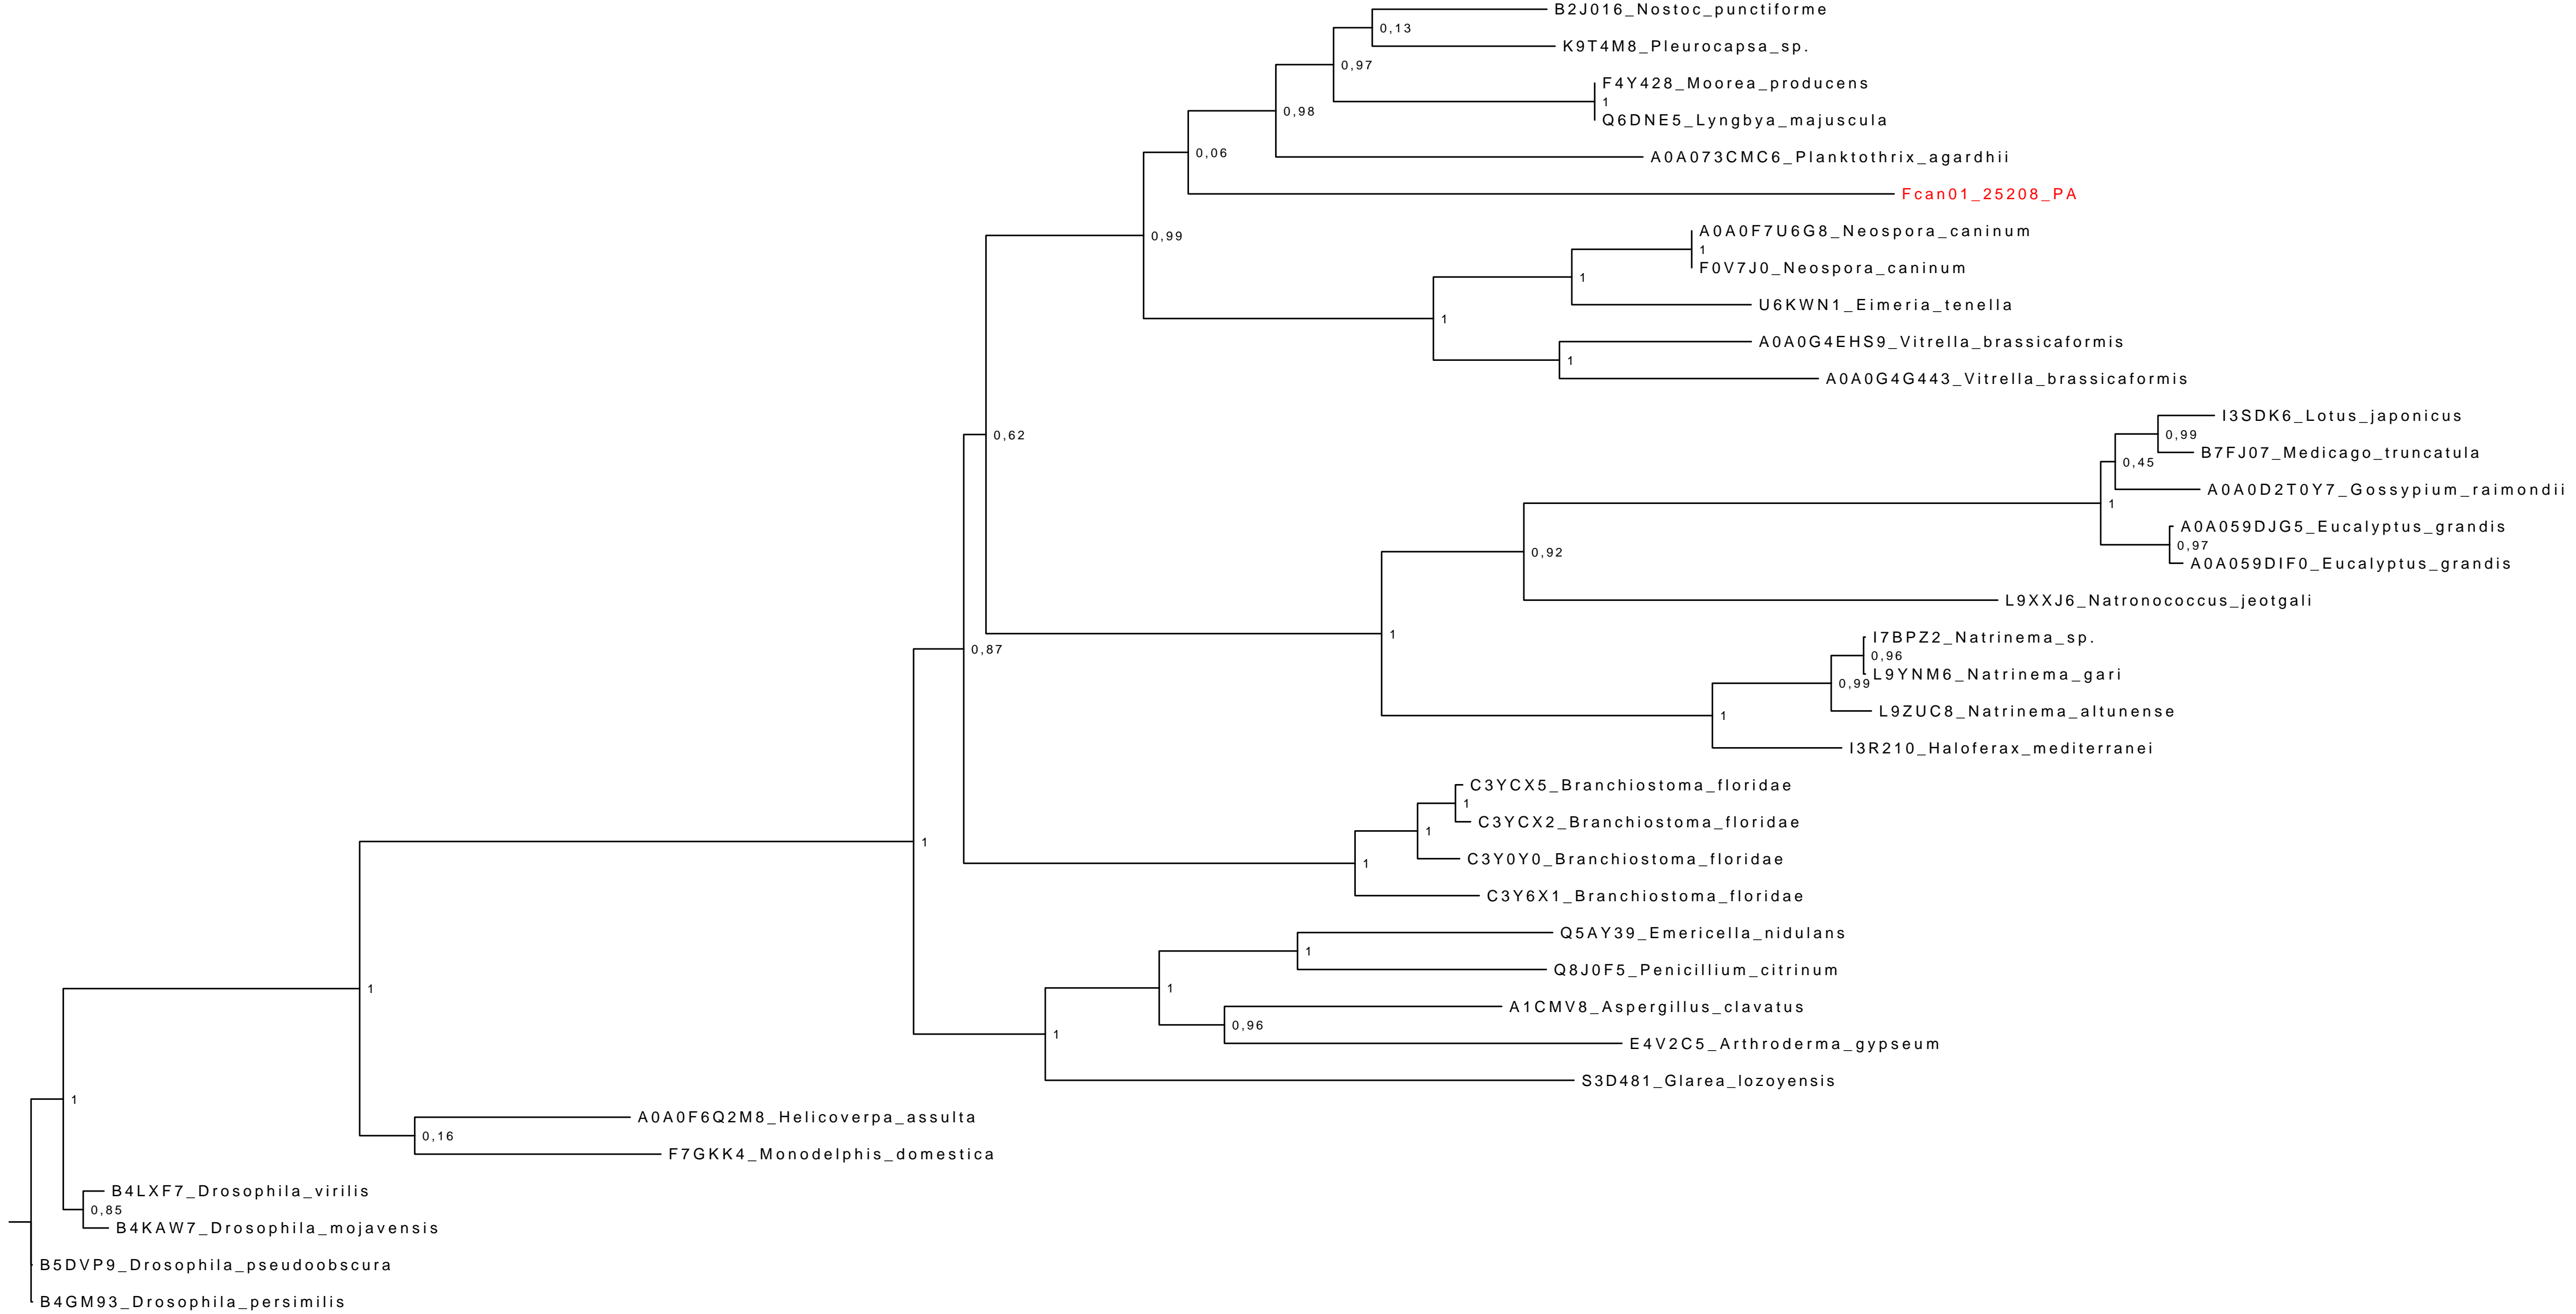

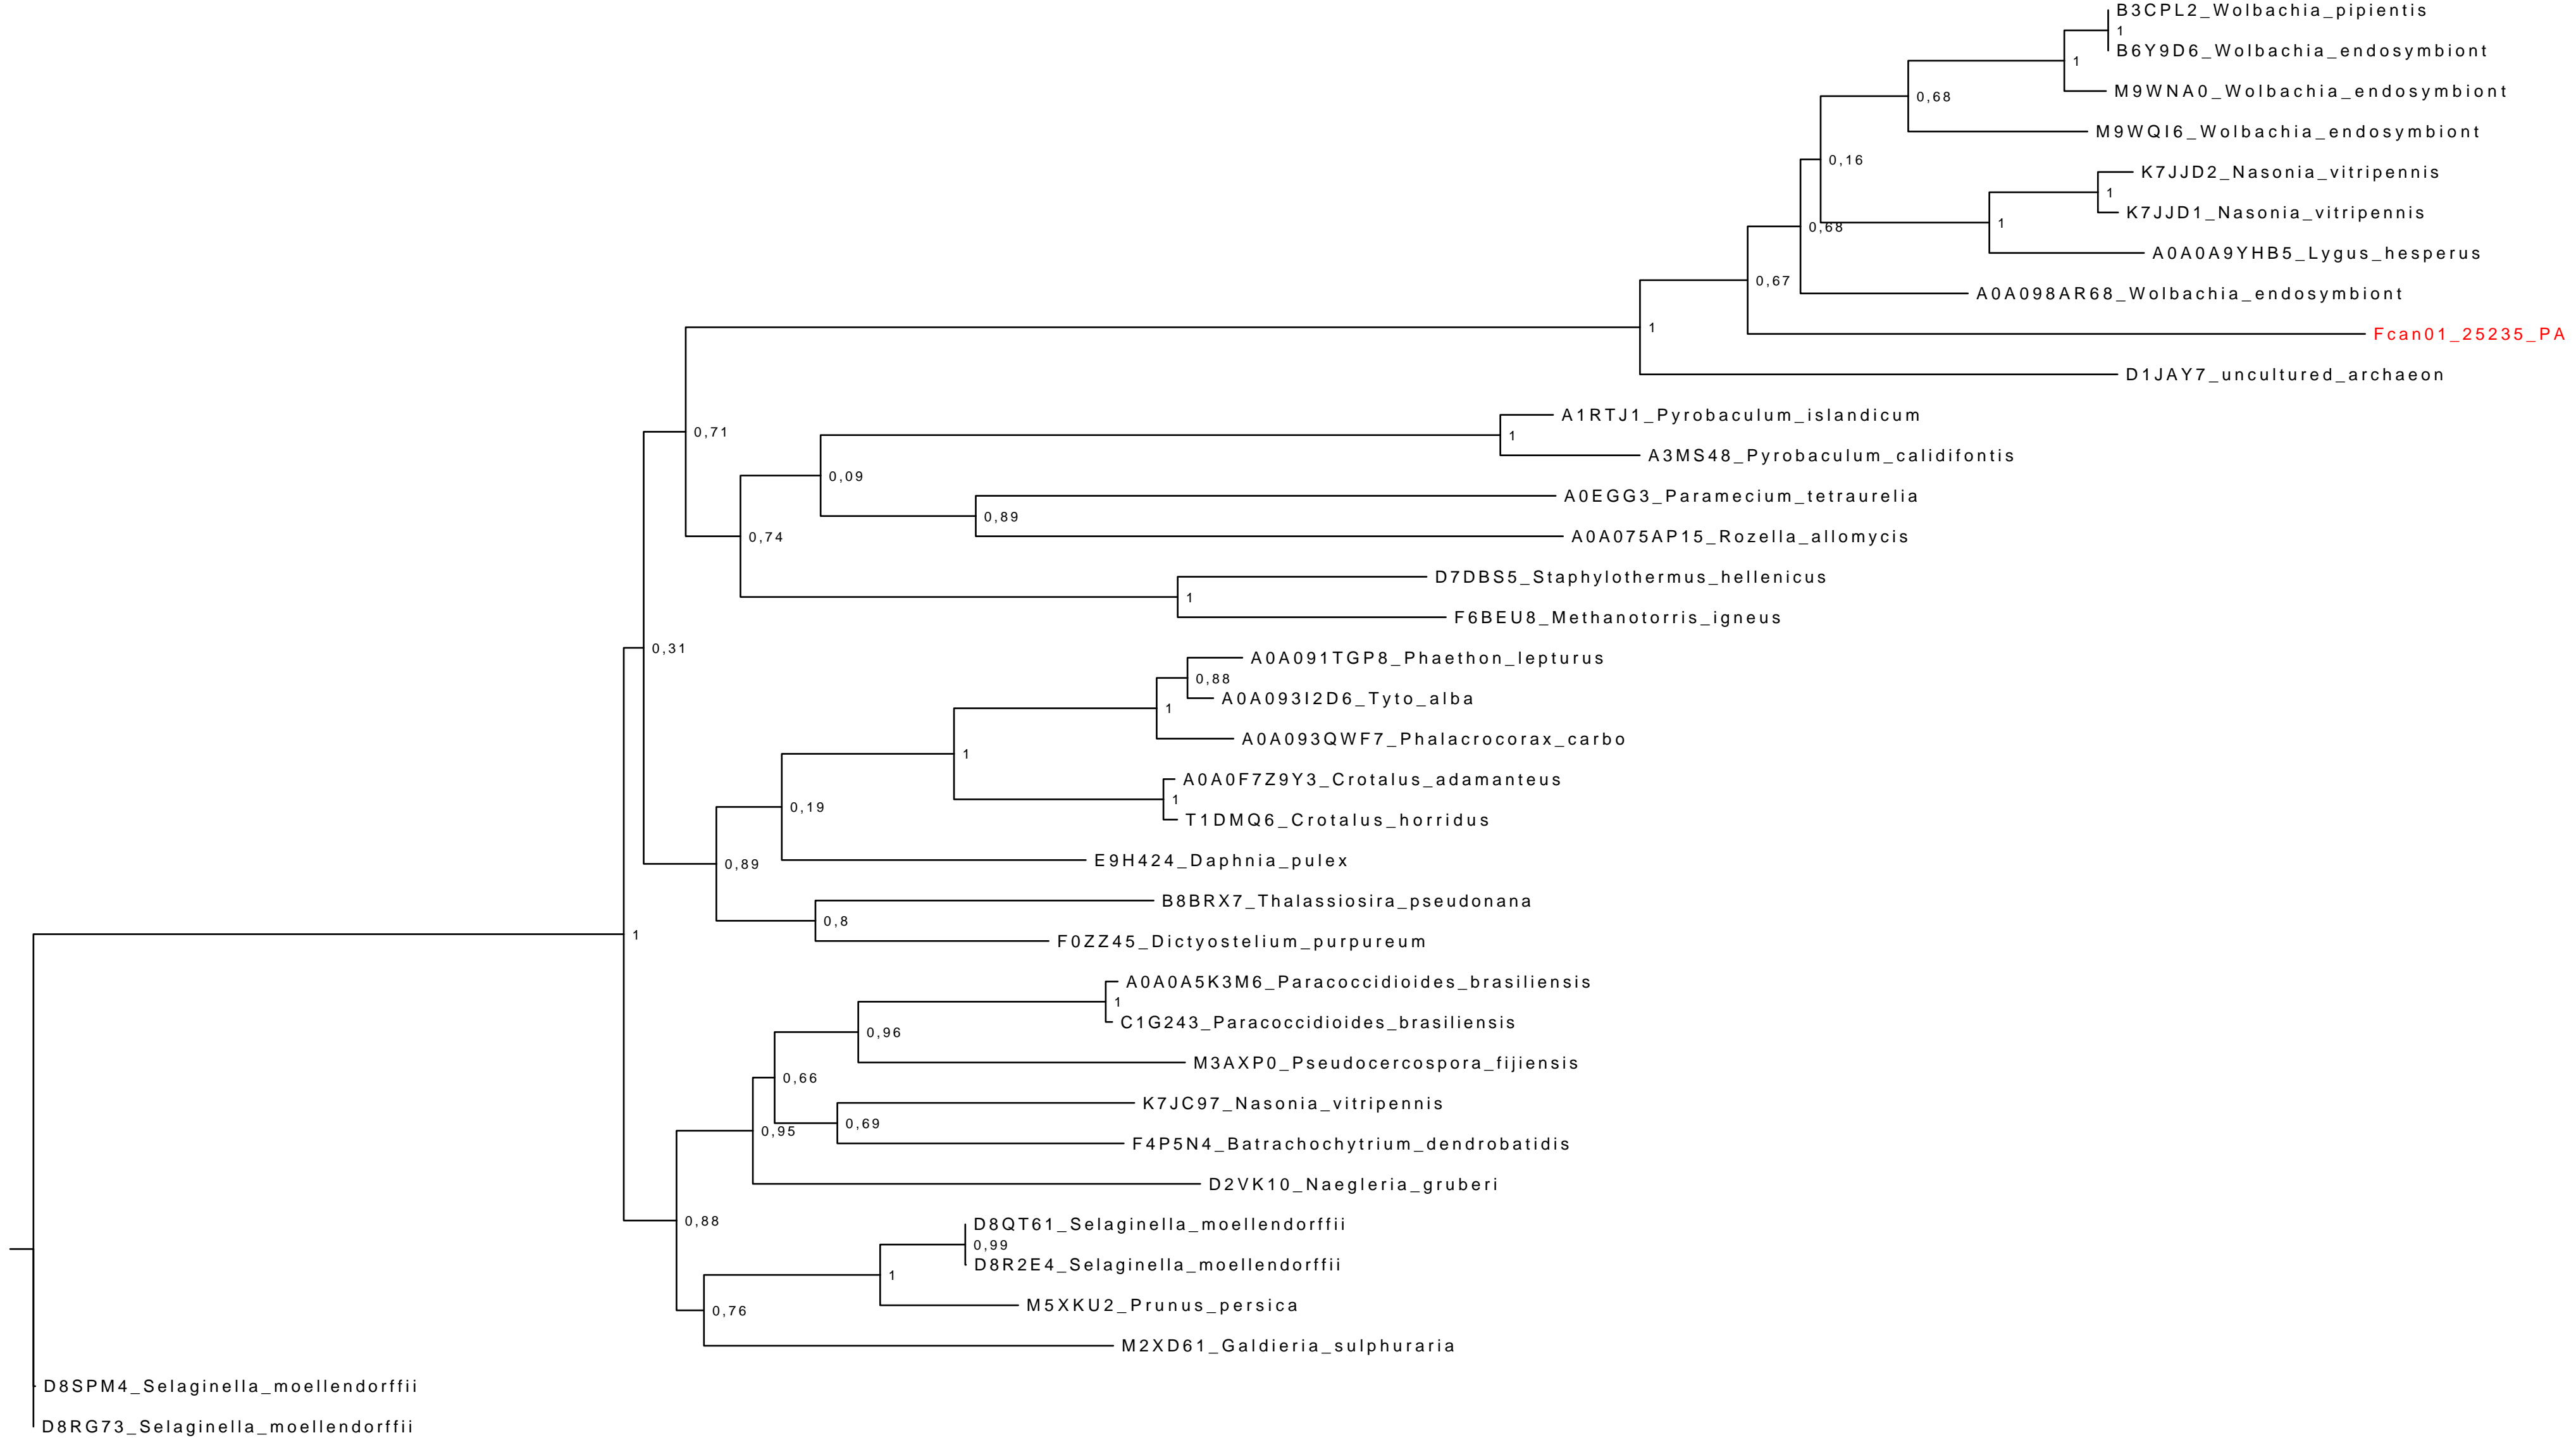

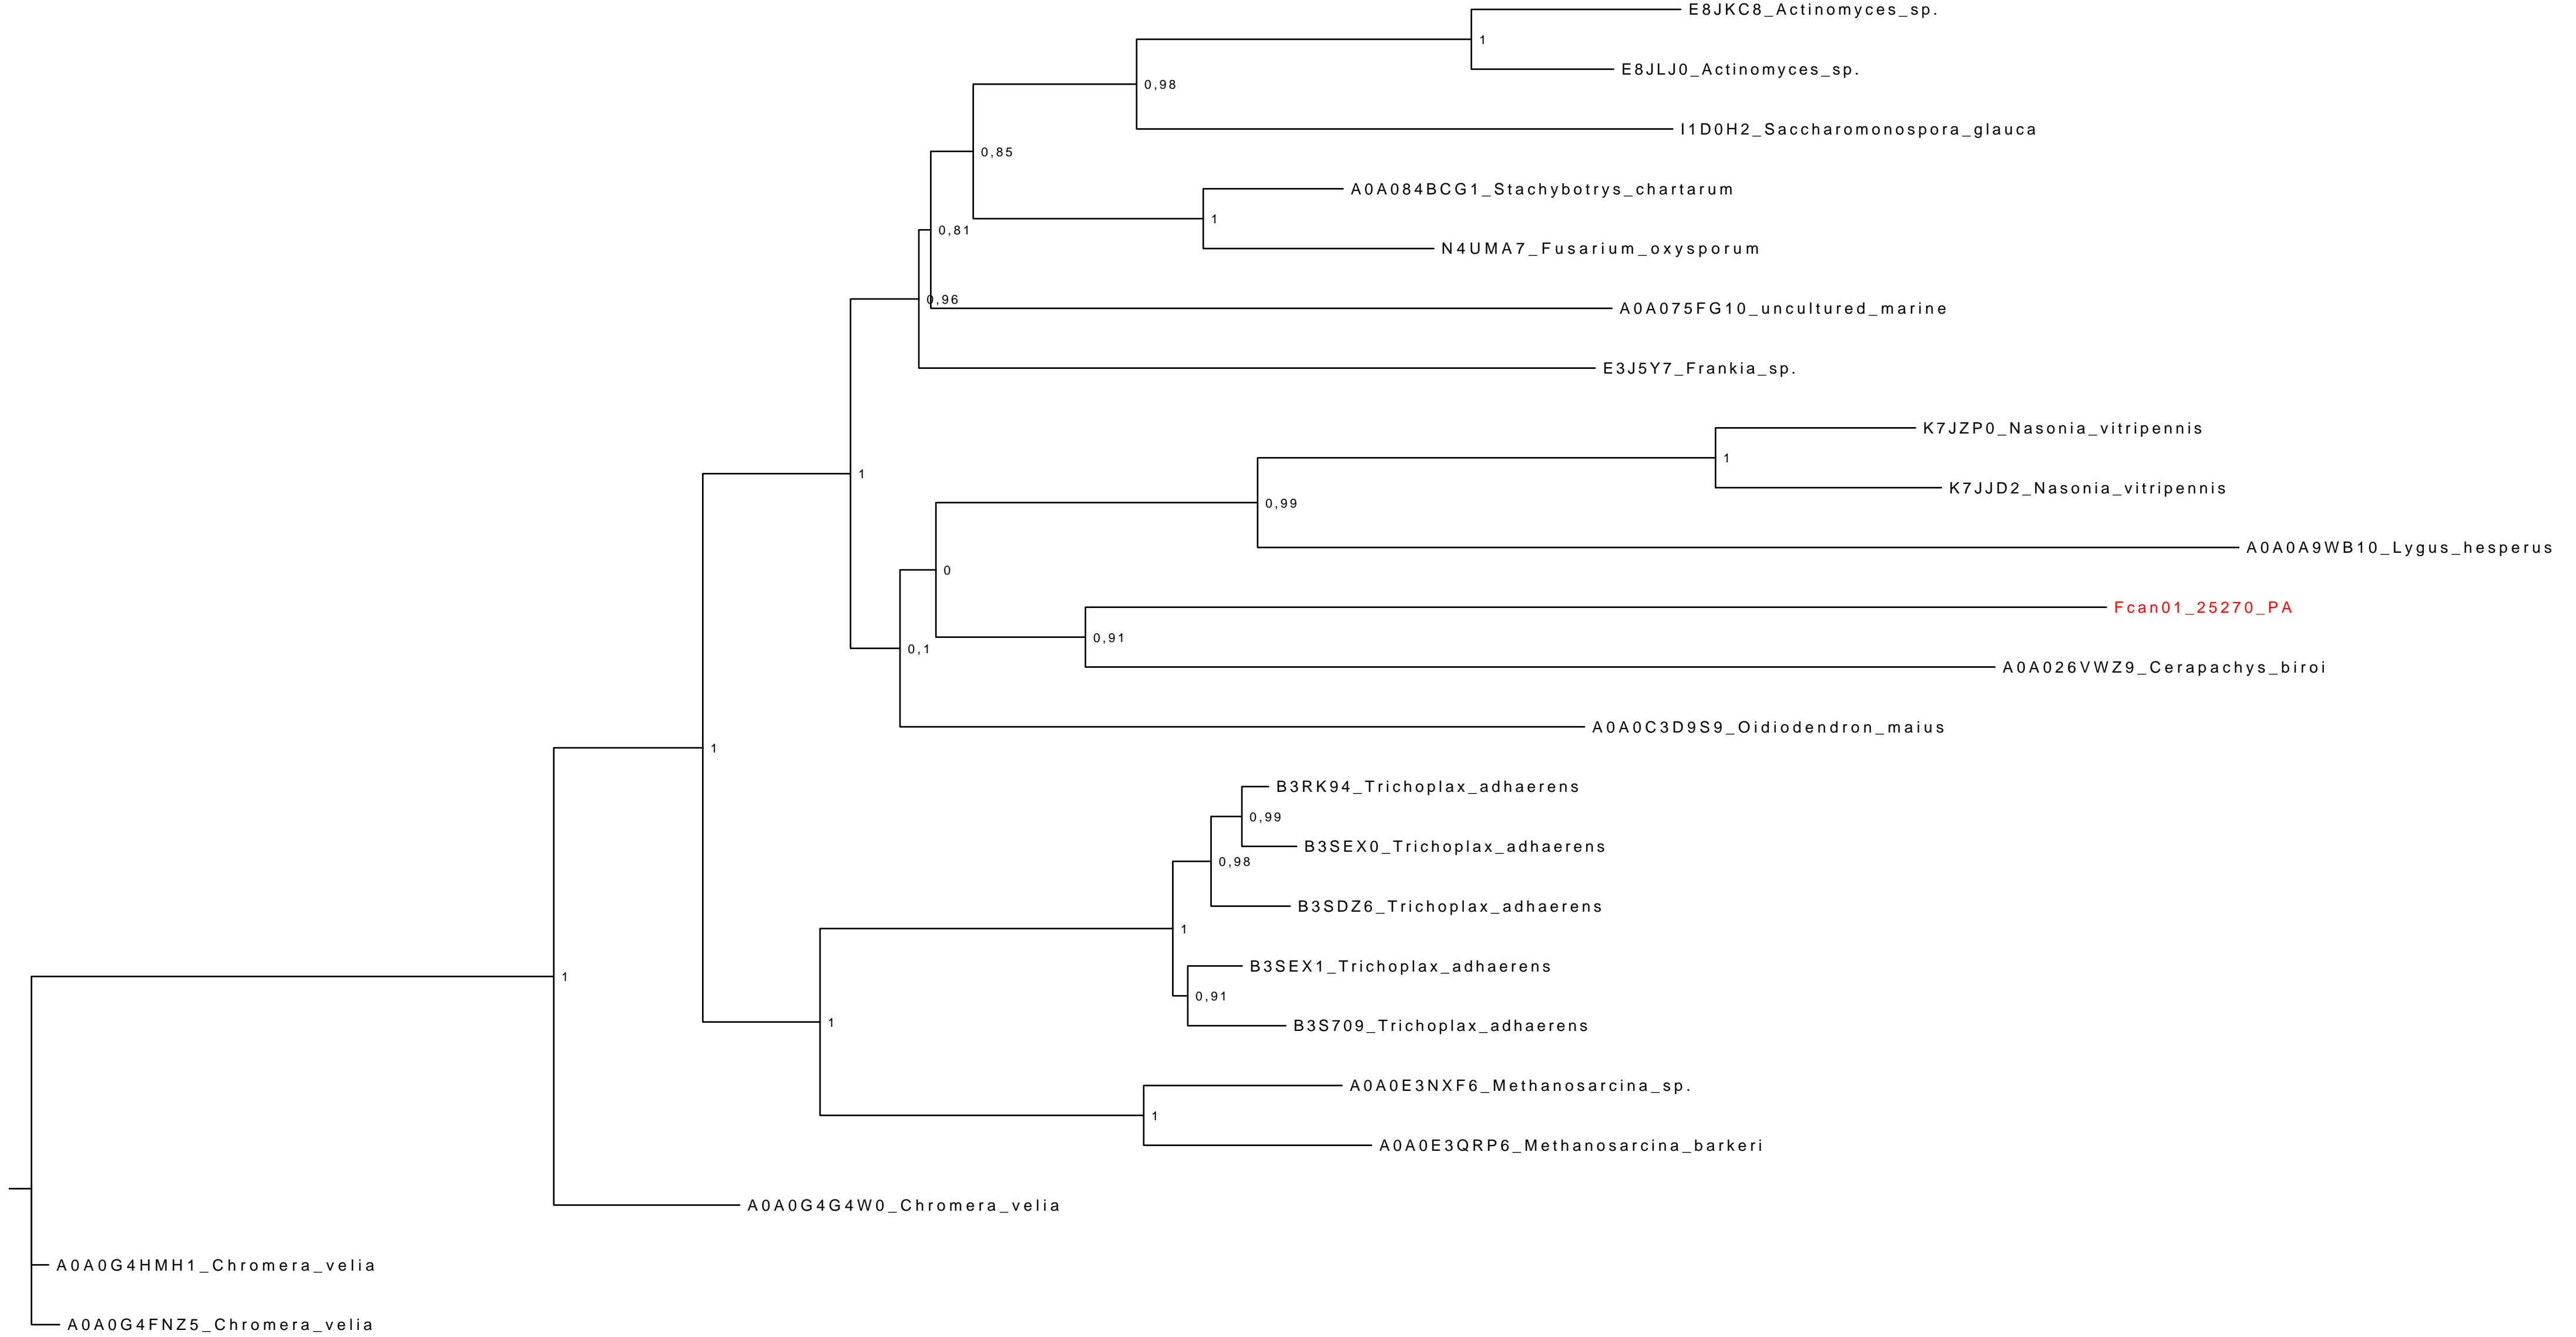



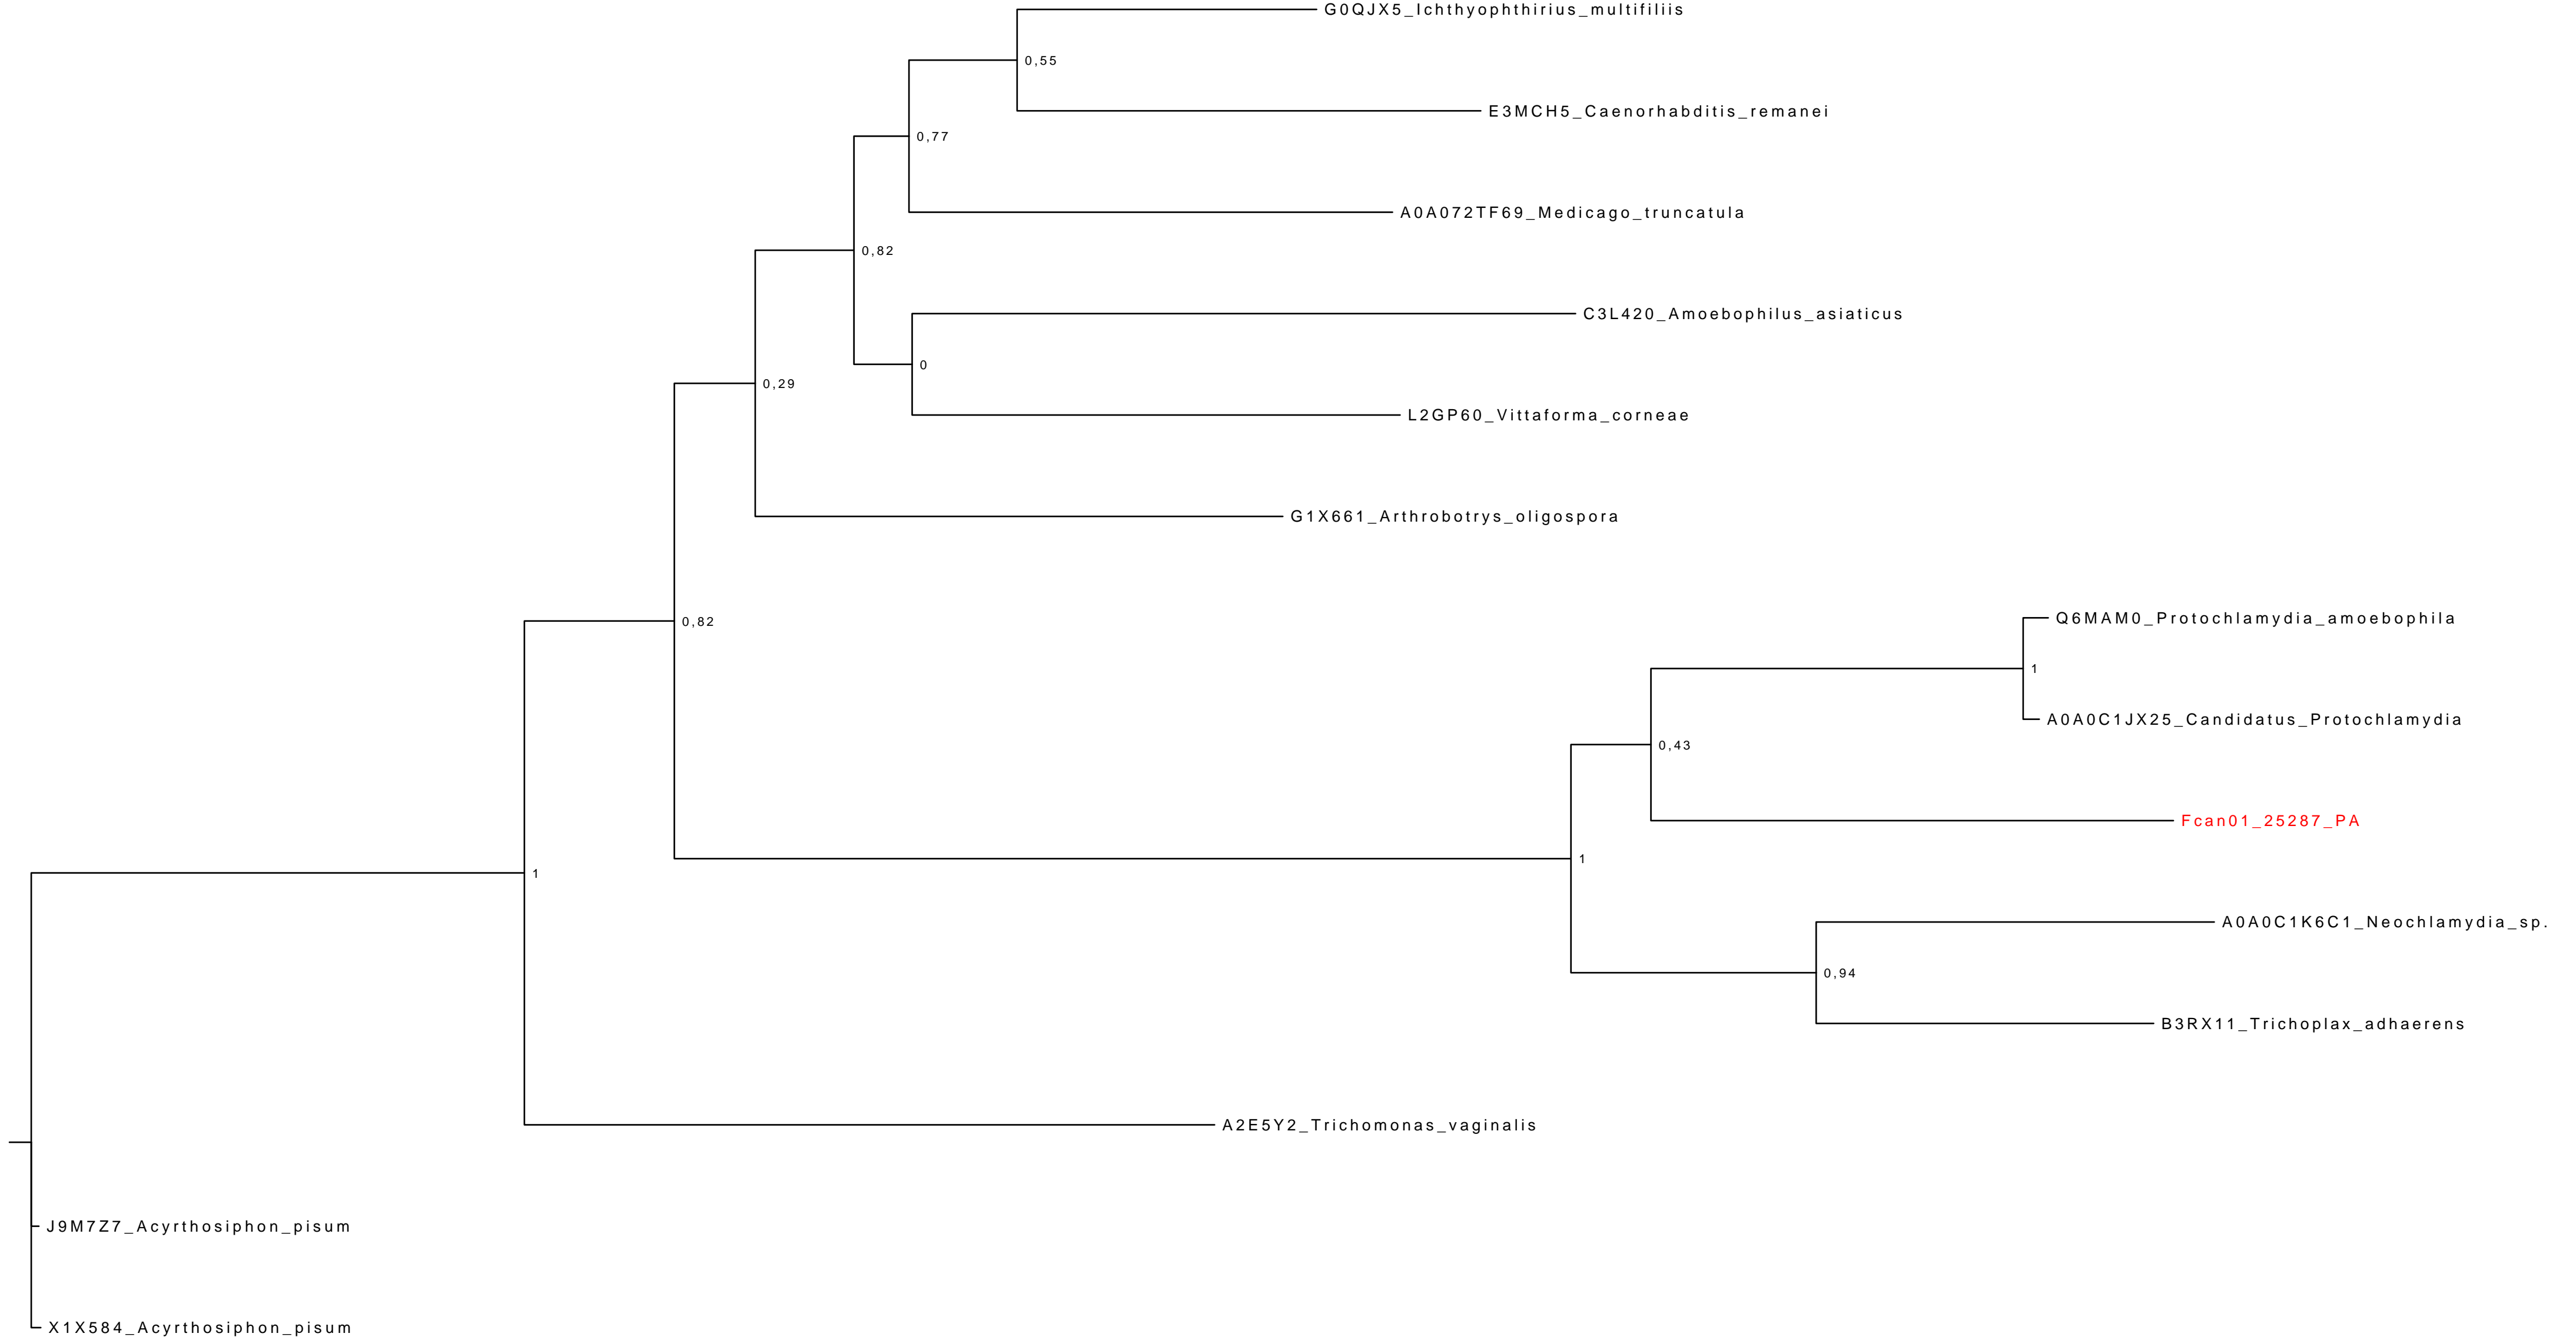

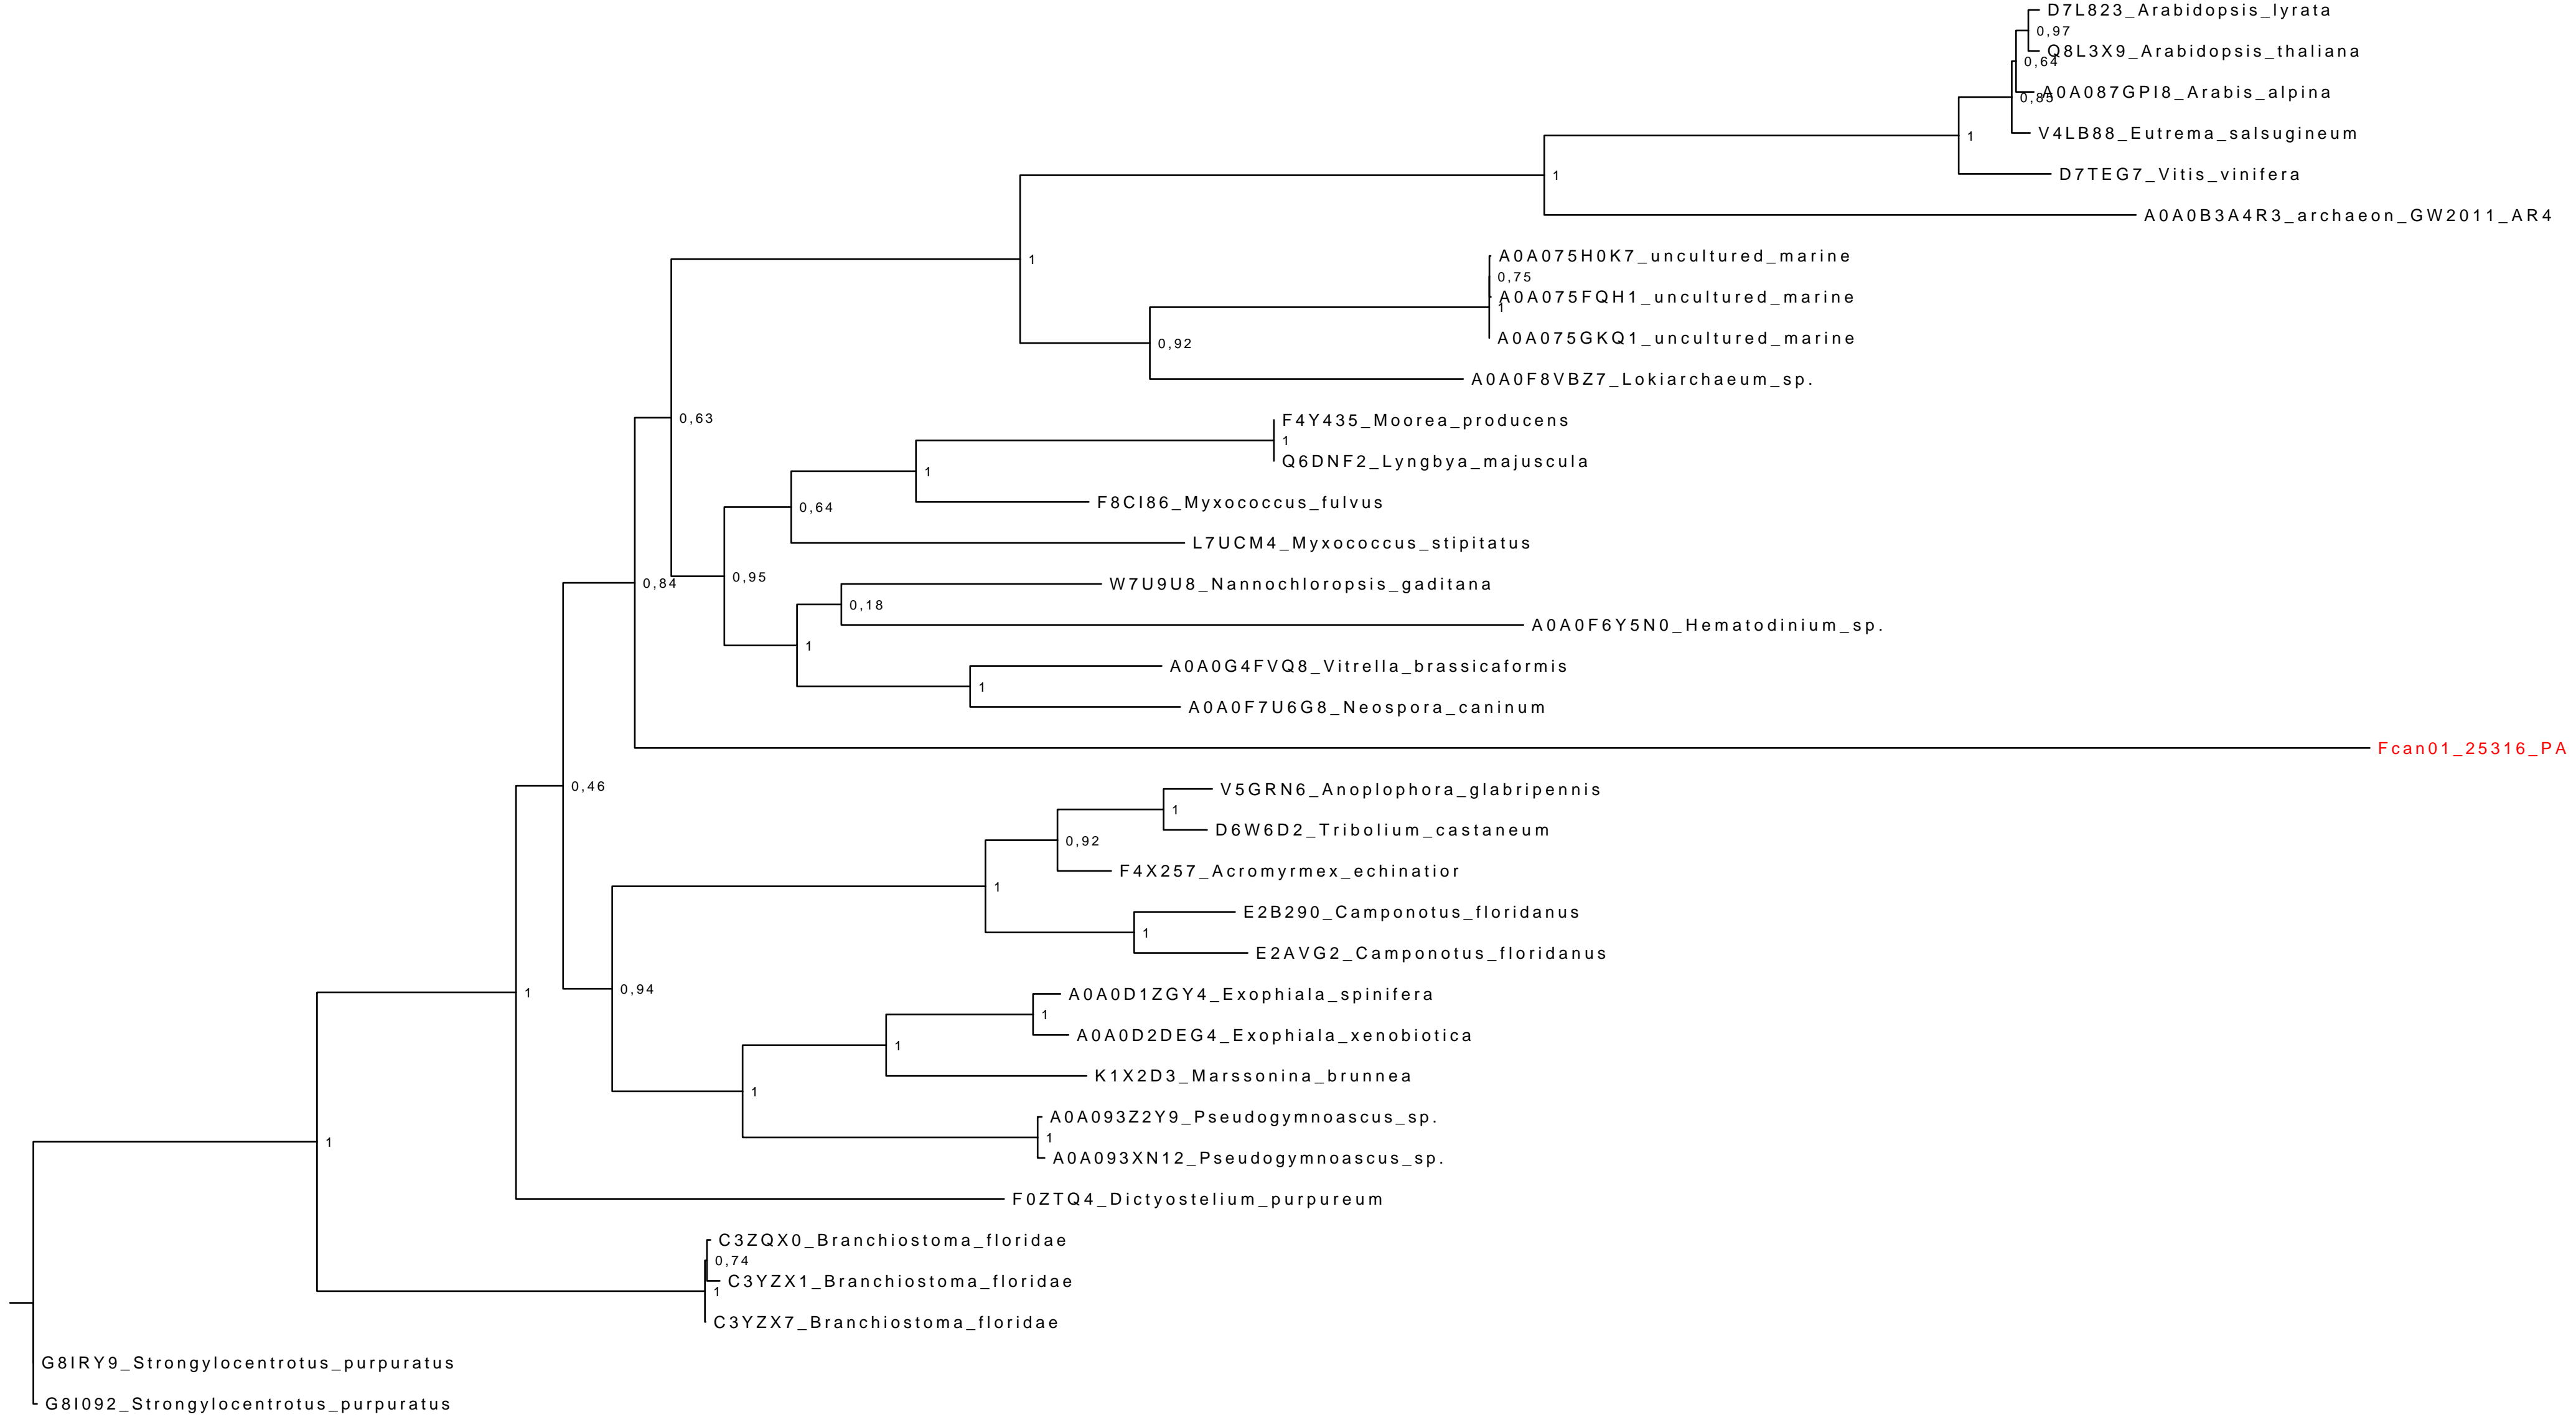

0.8



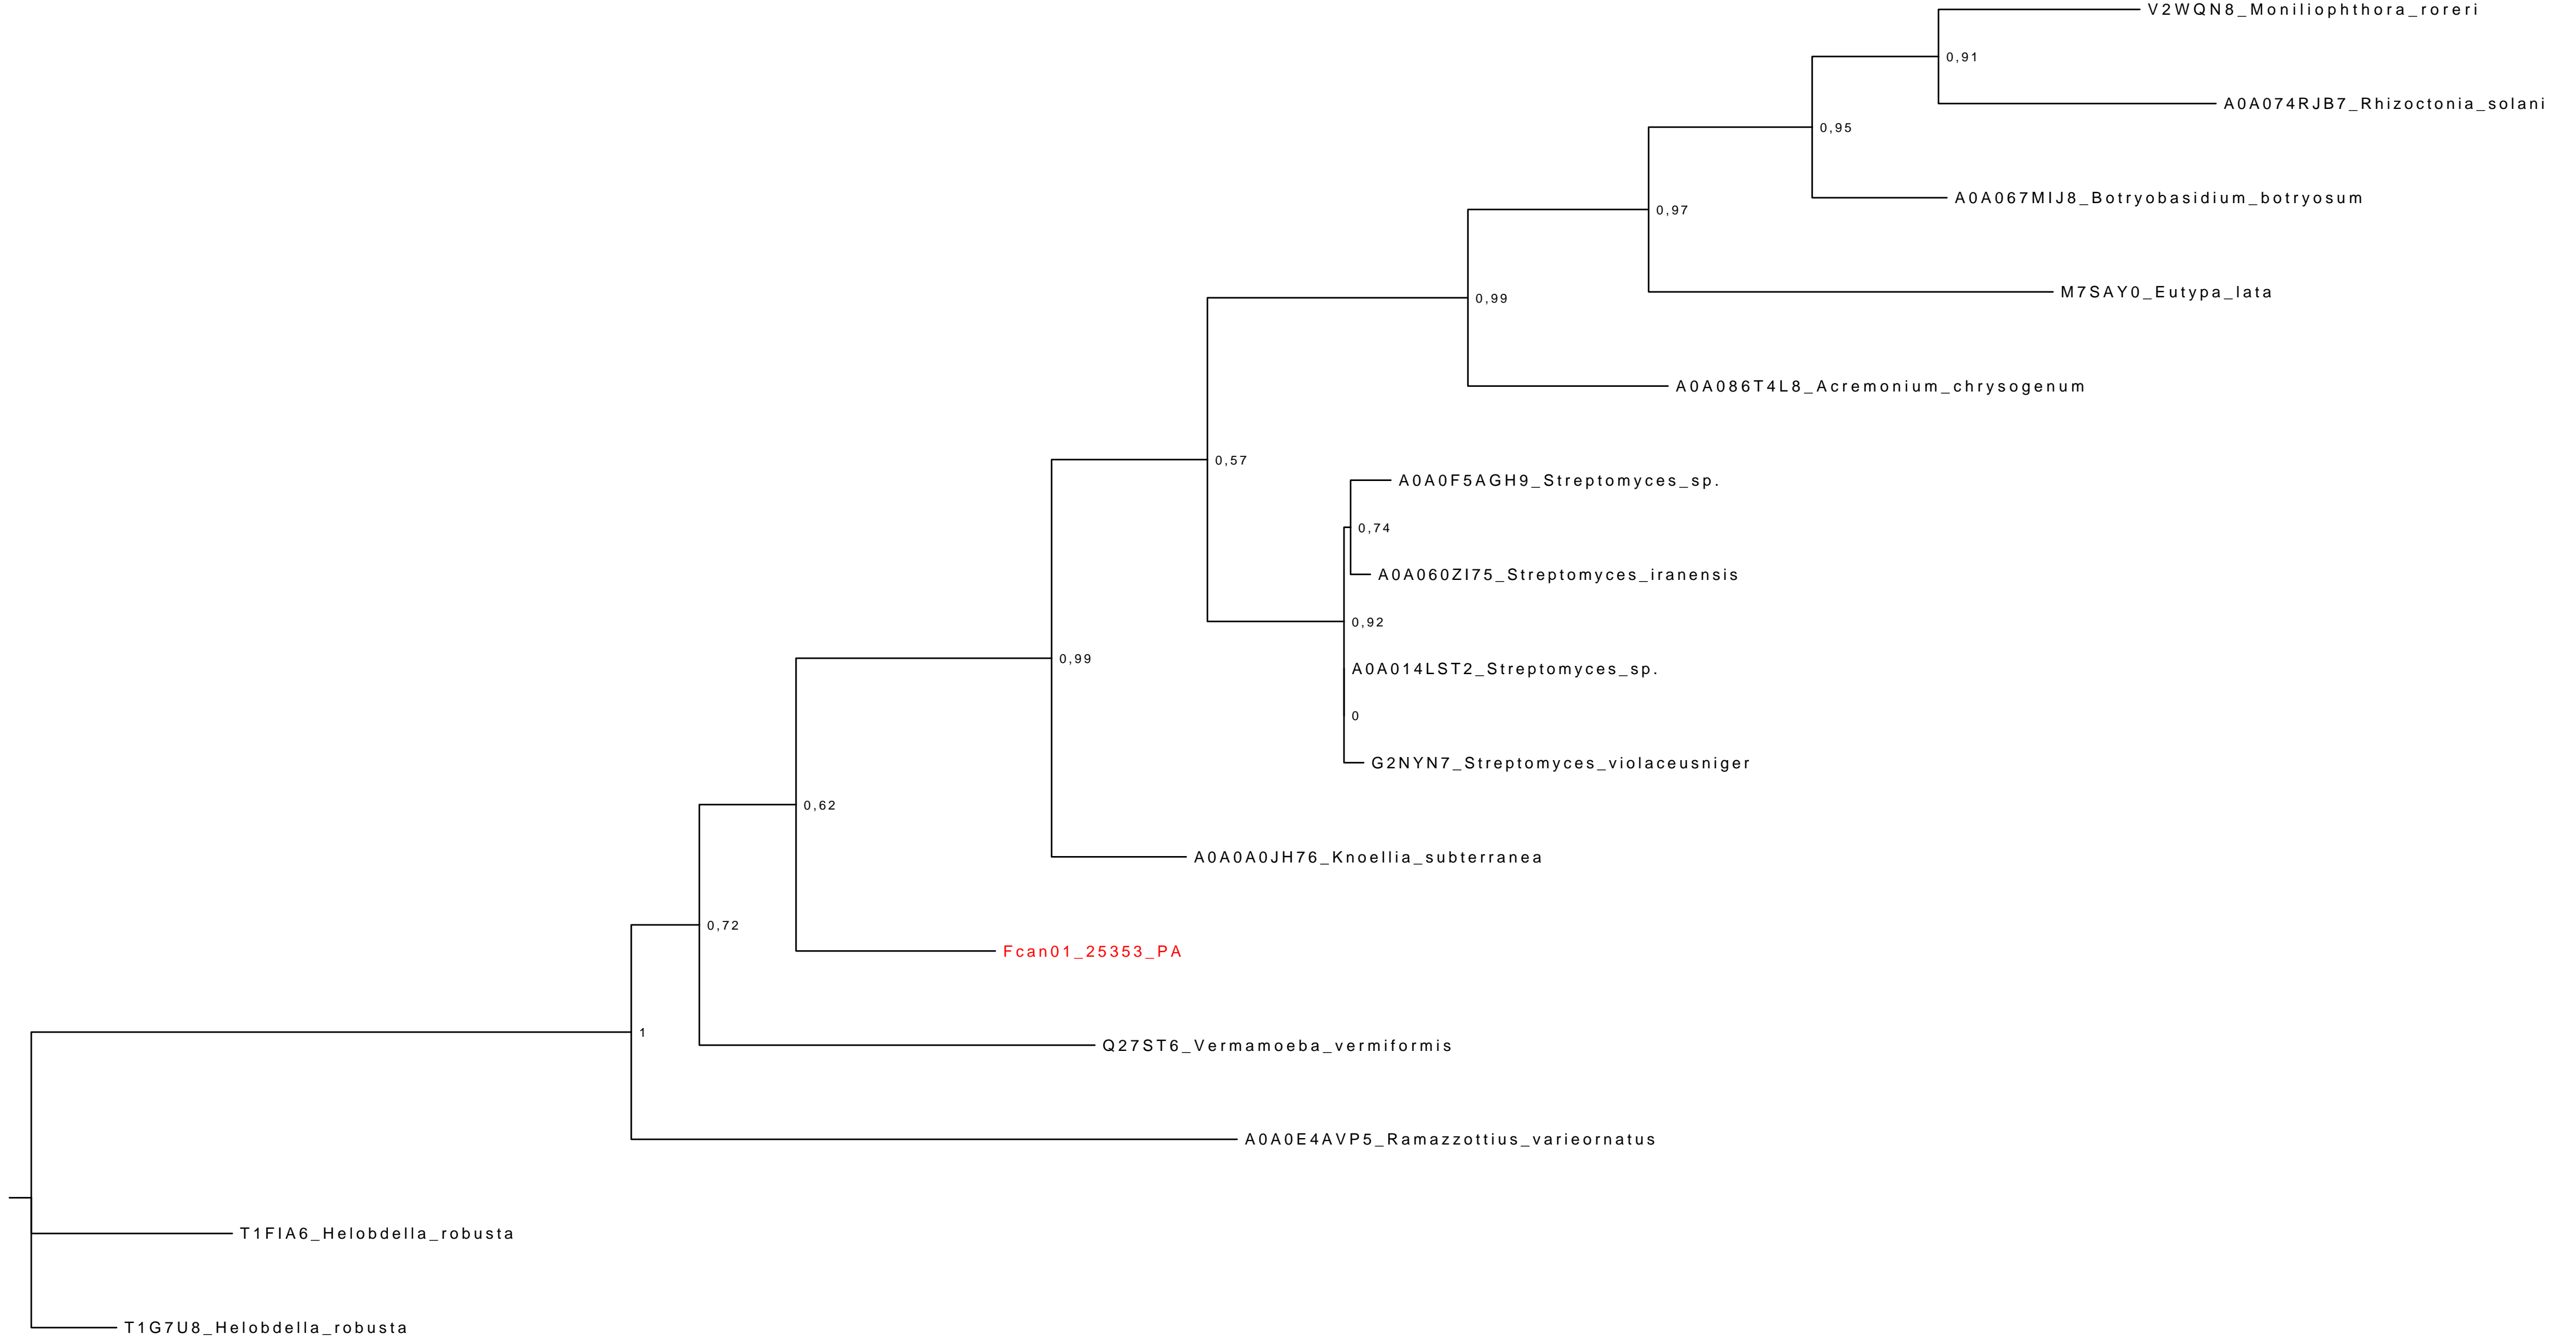

0.3

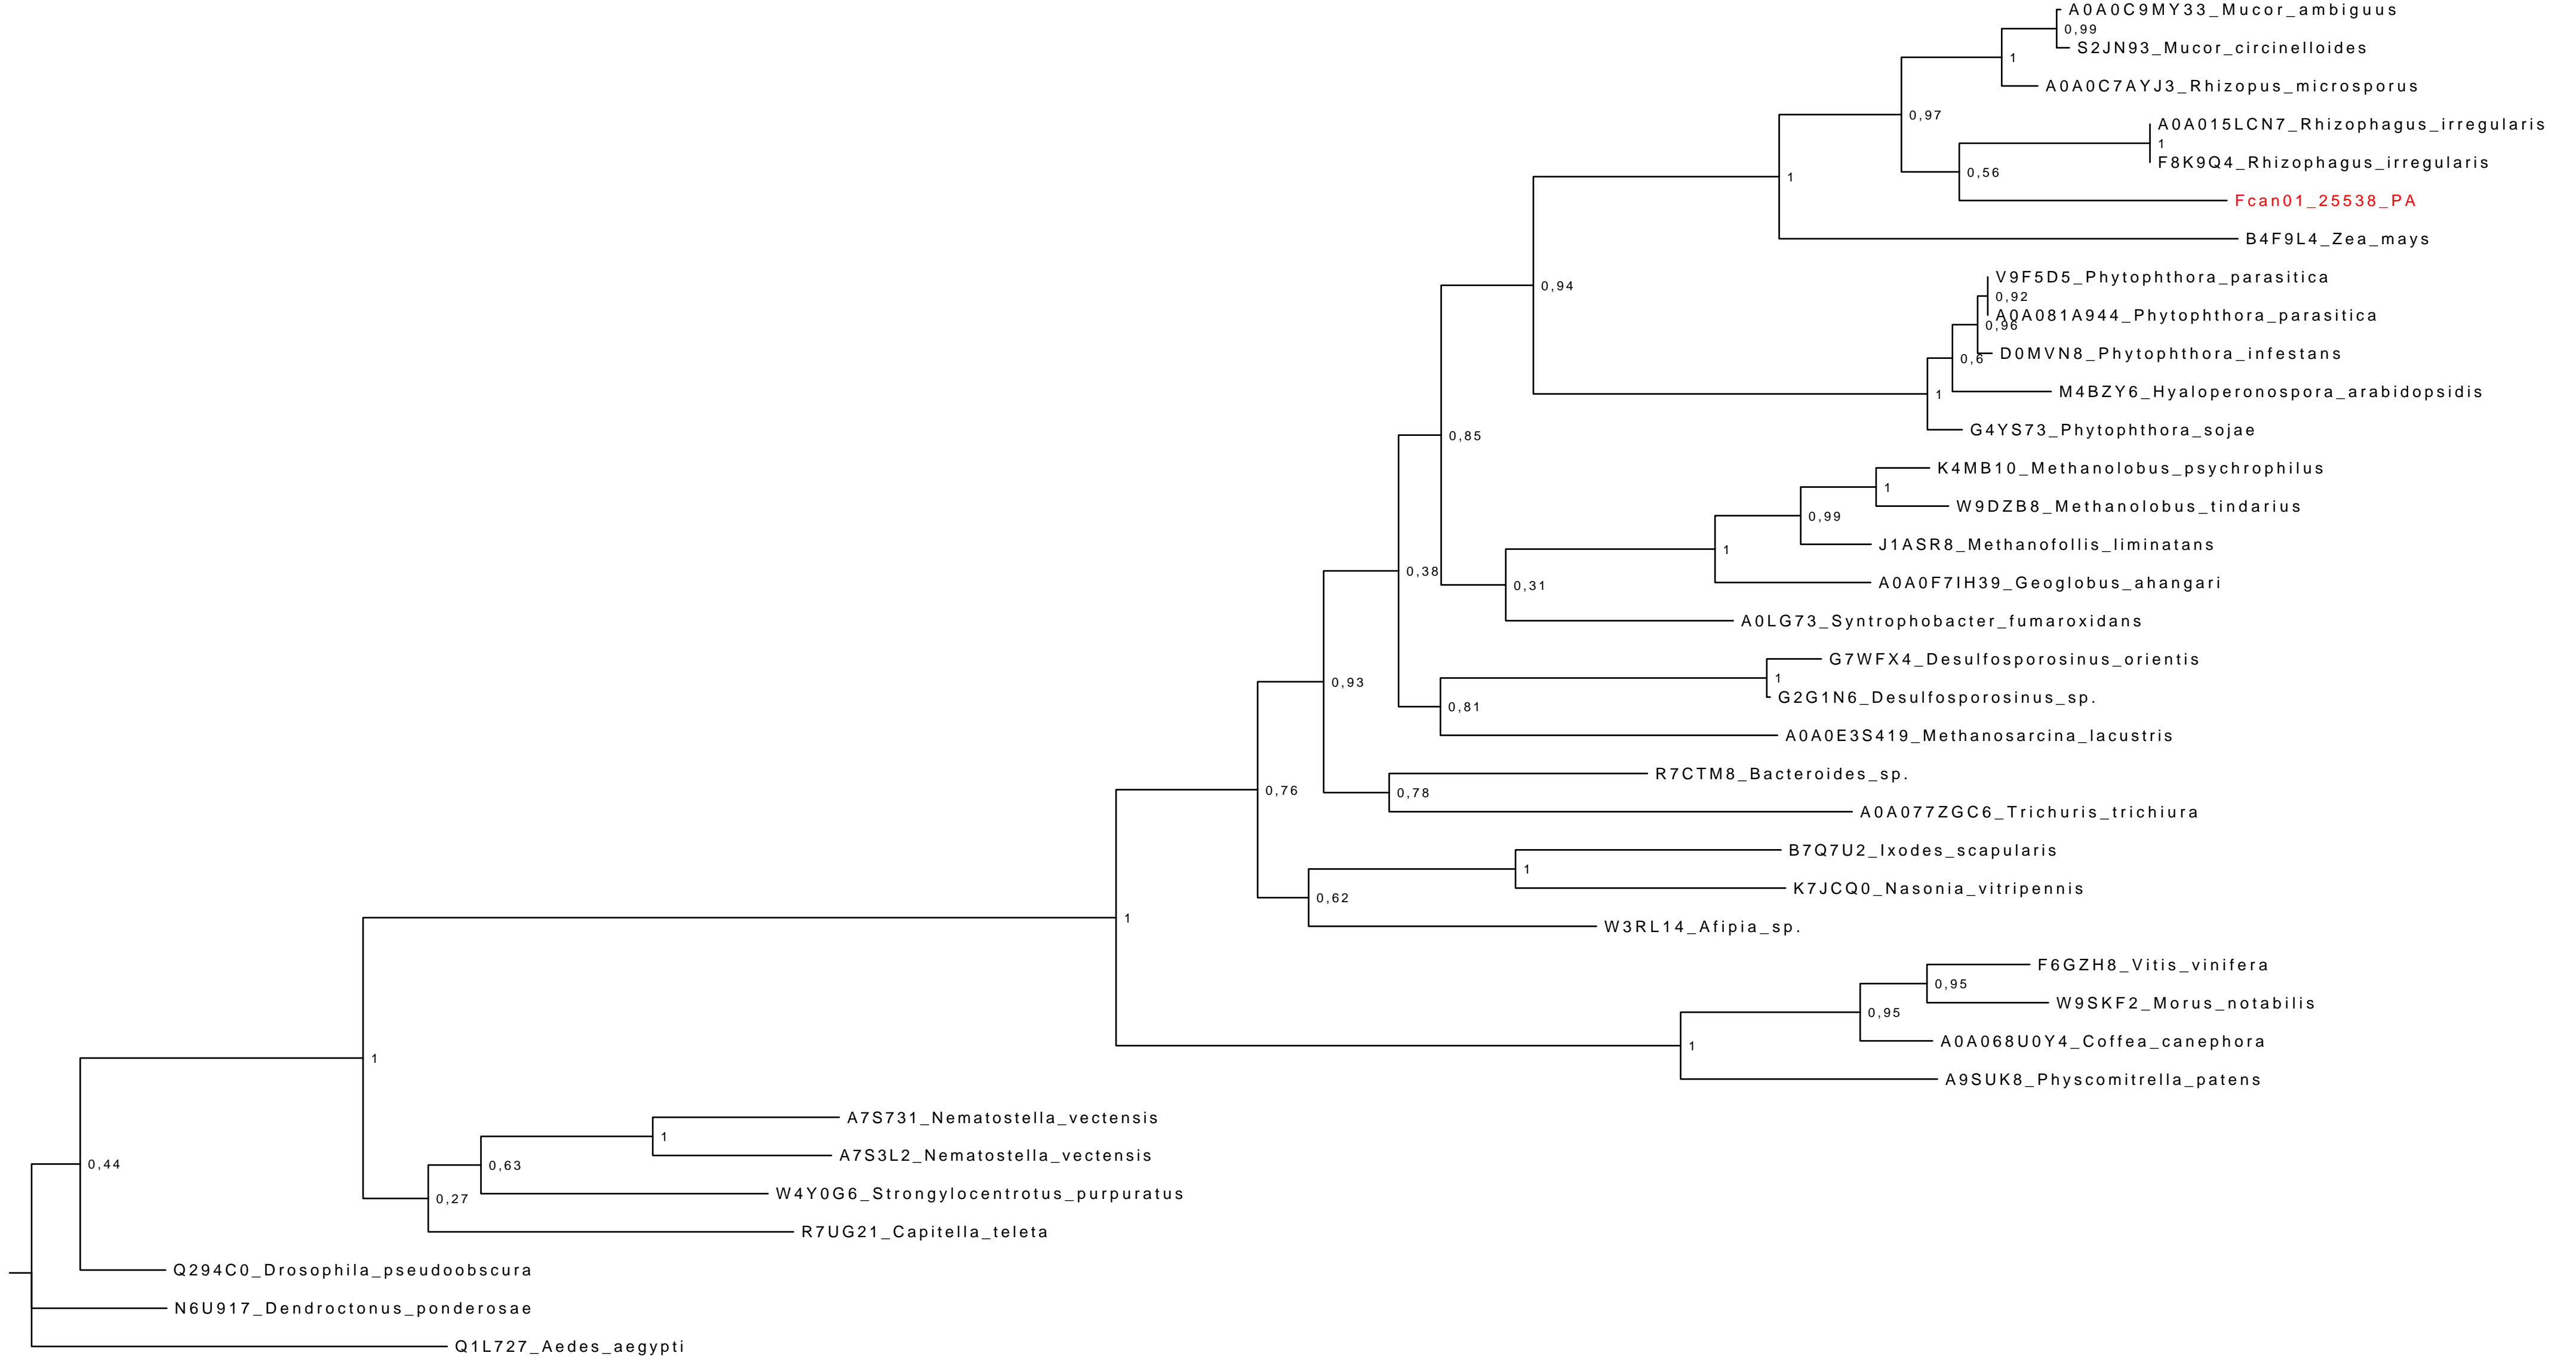

0.4

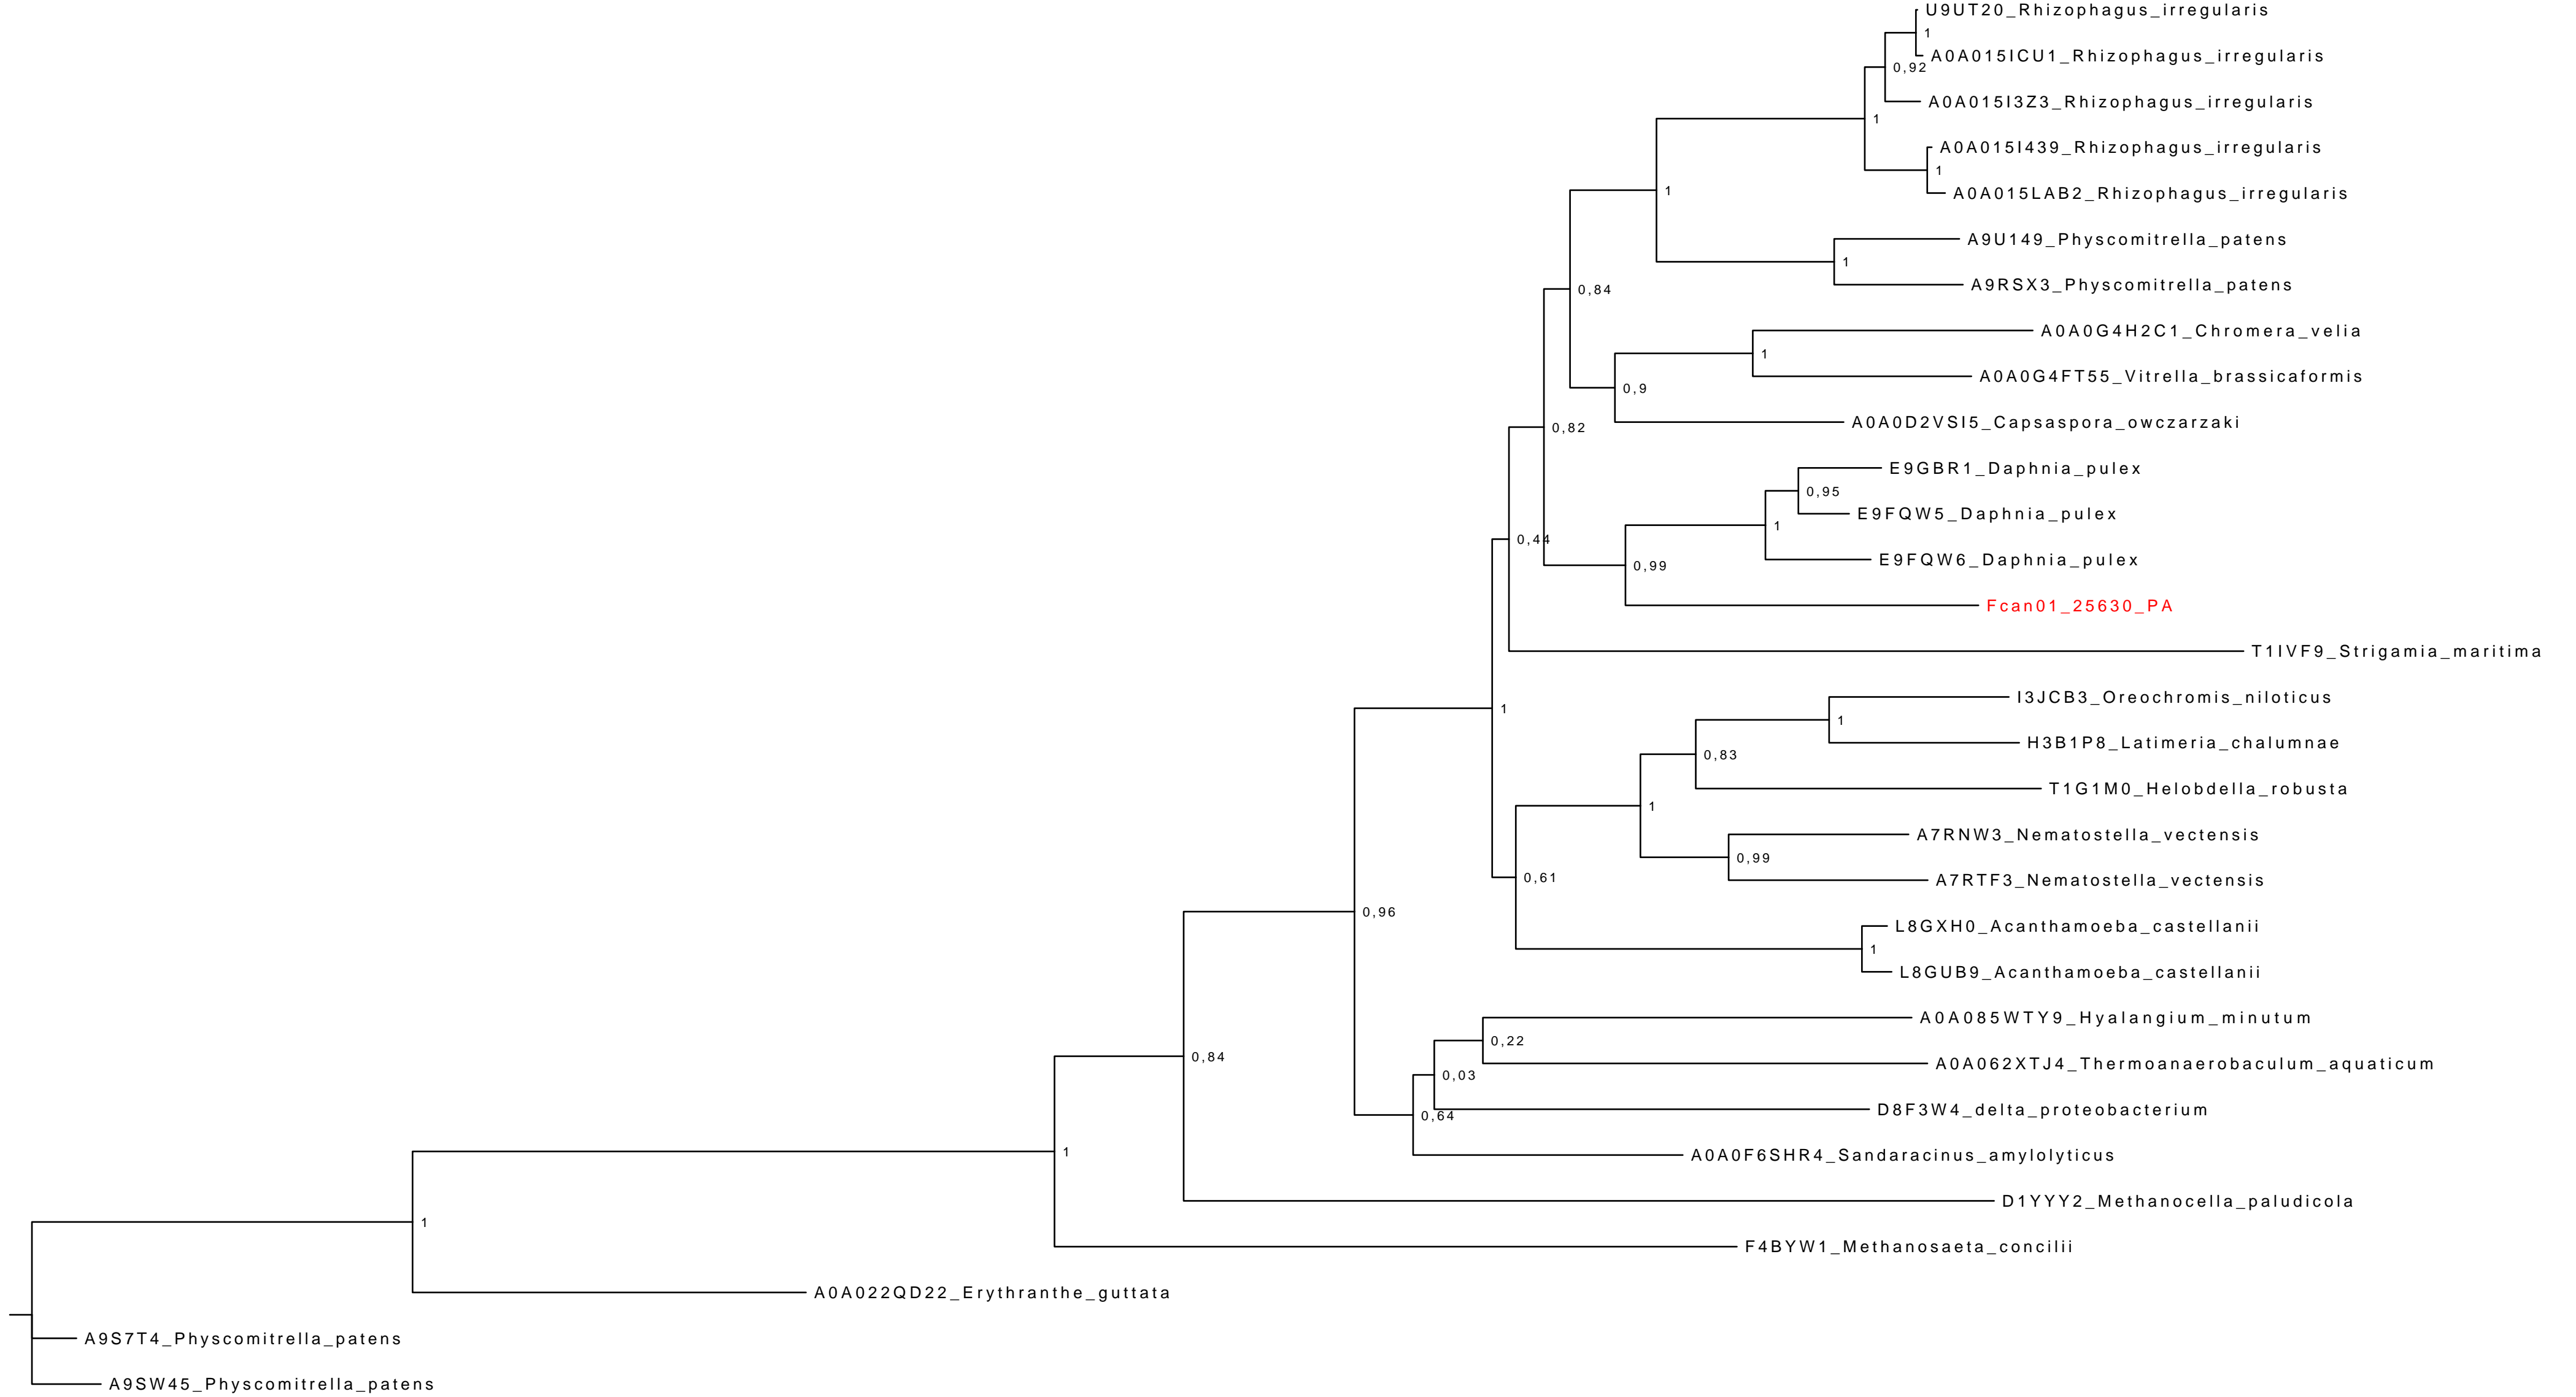

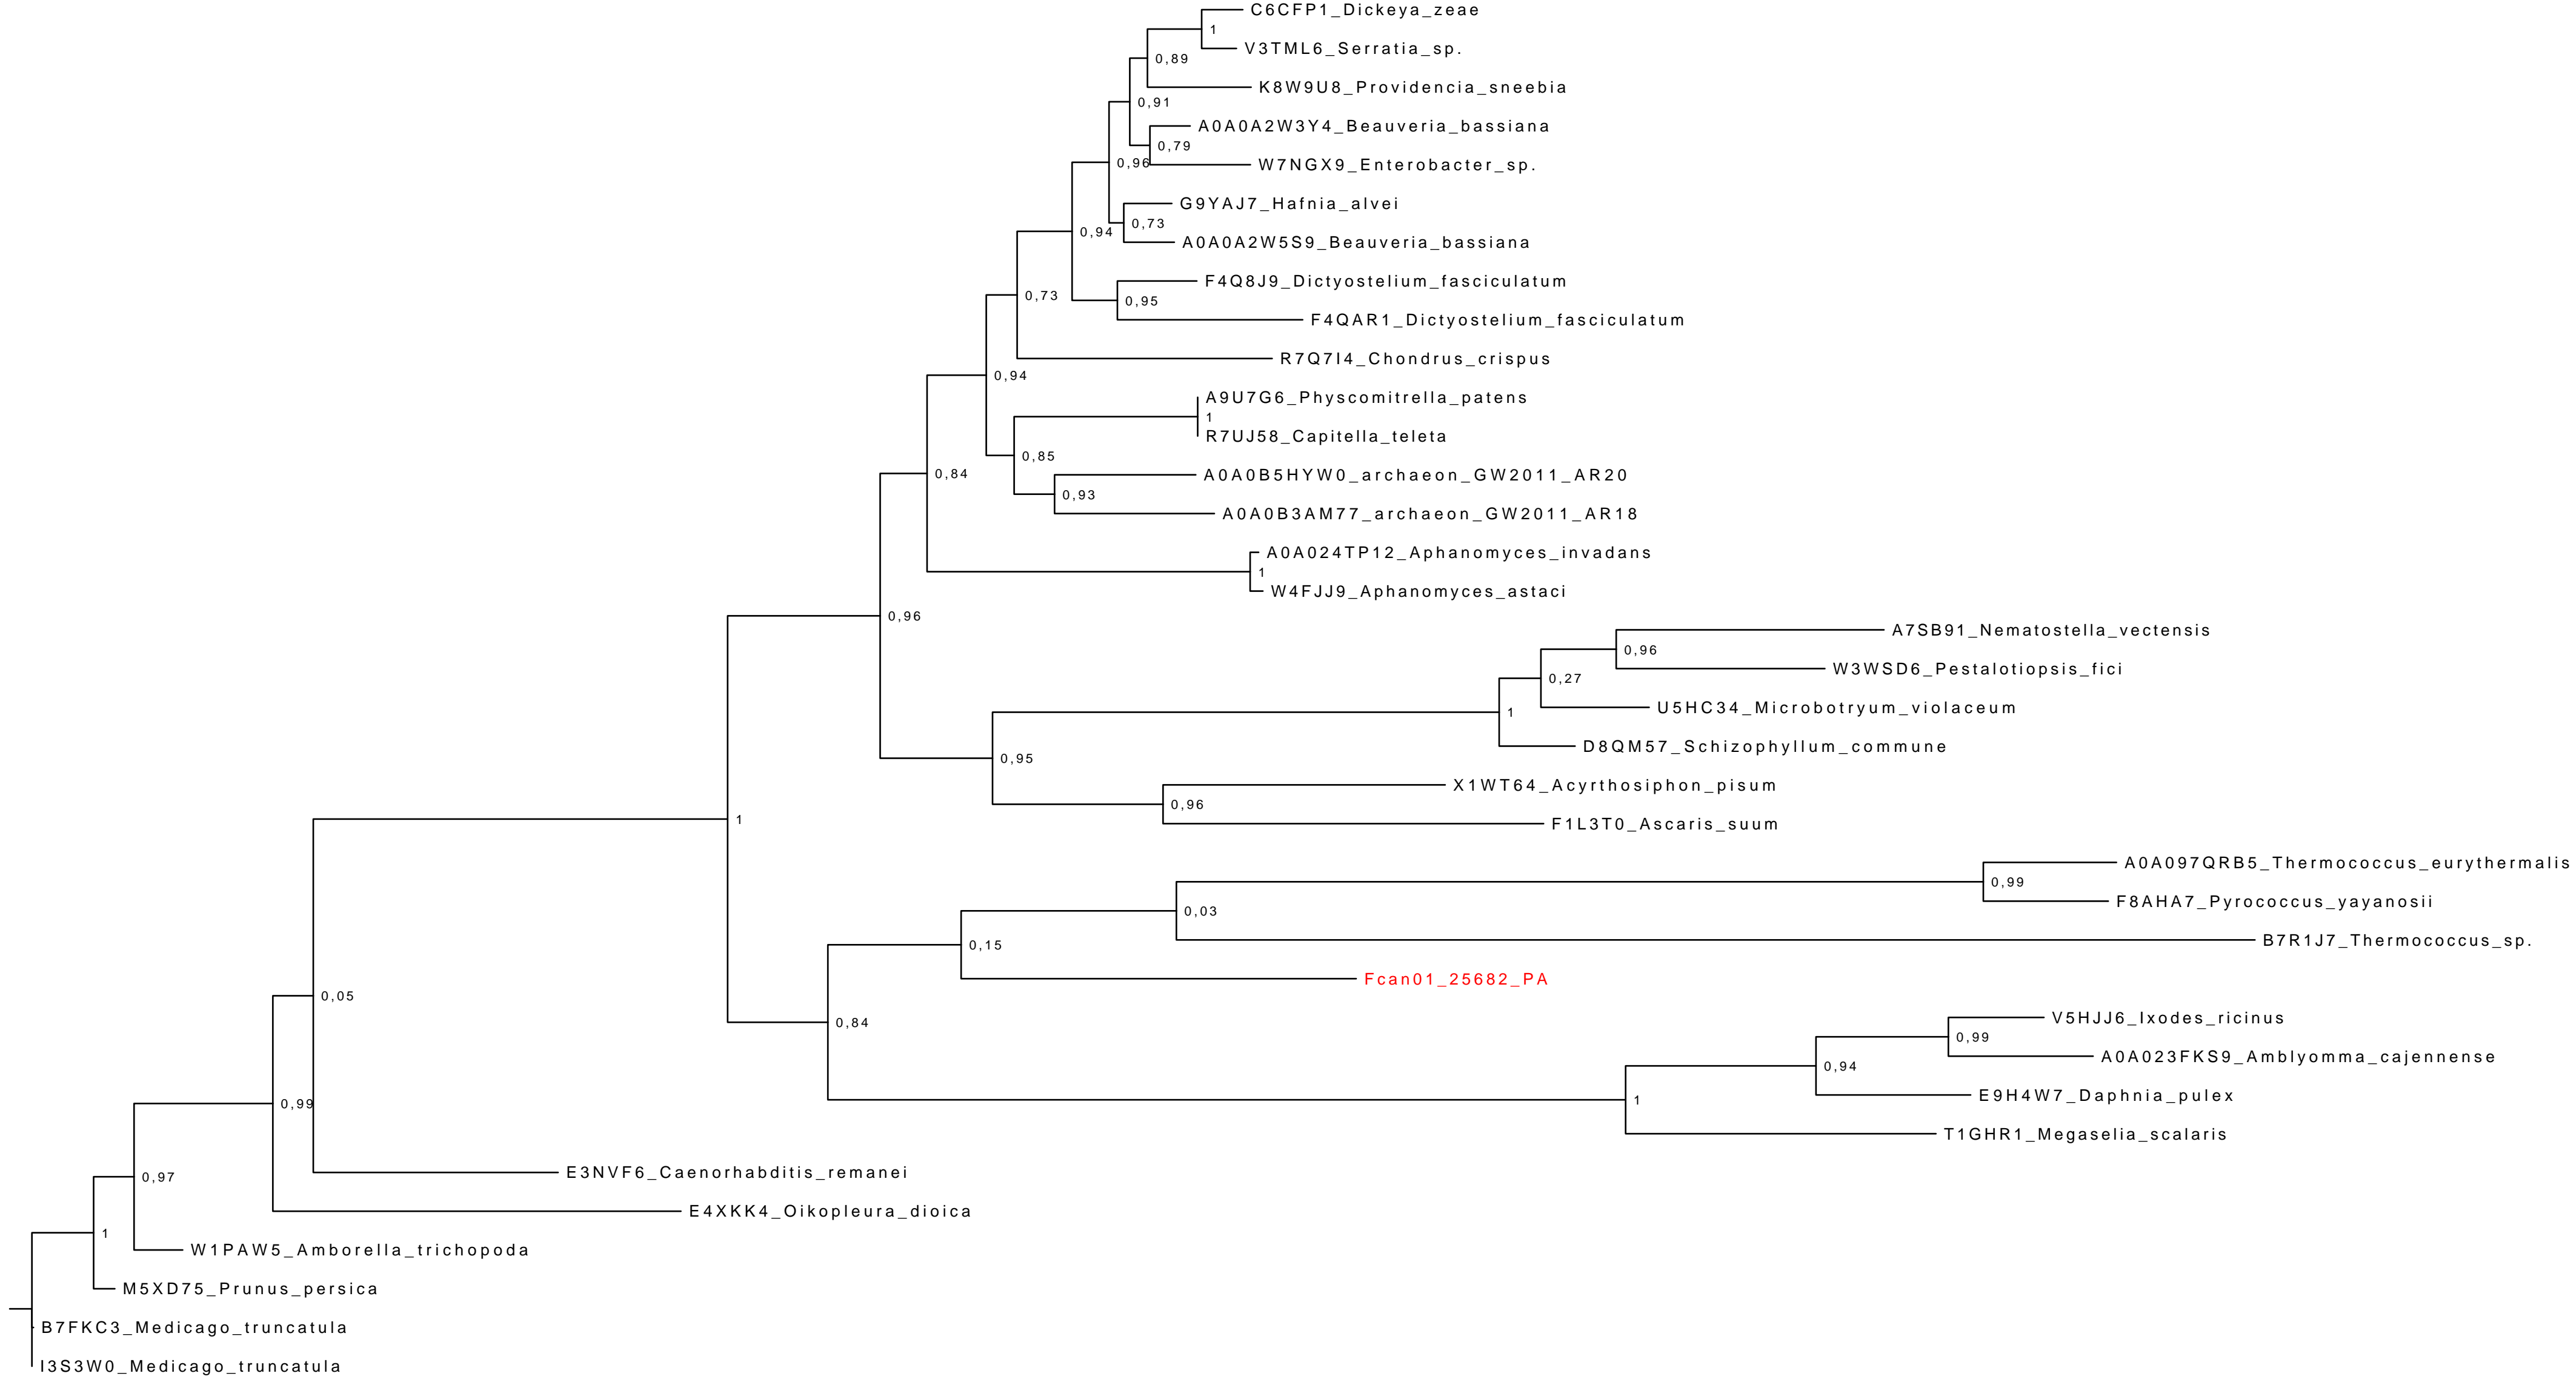

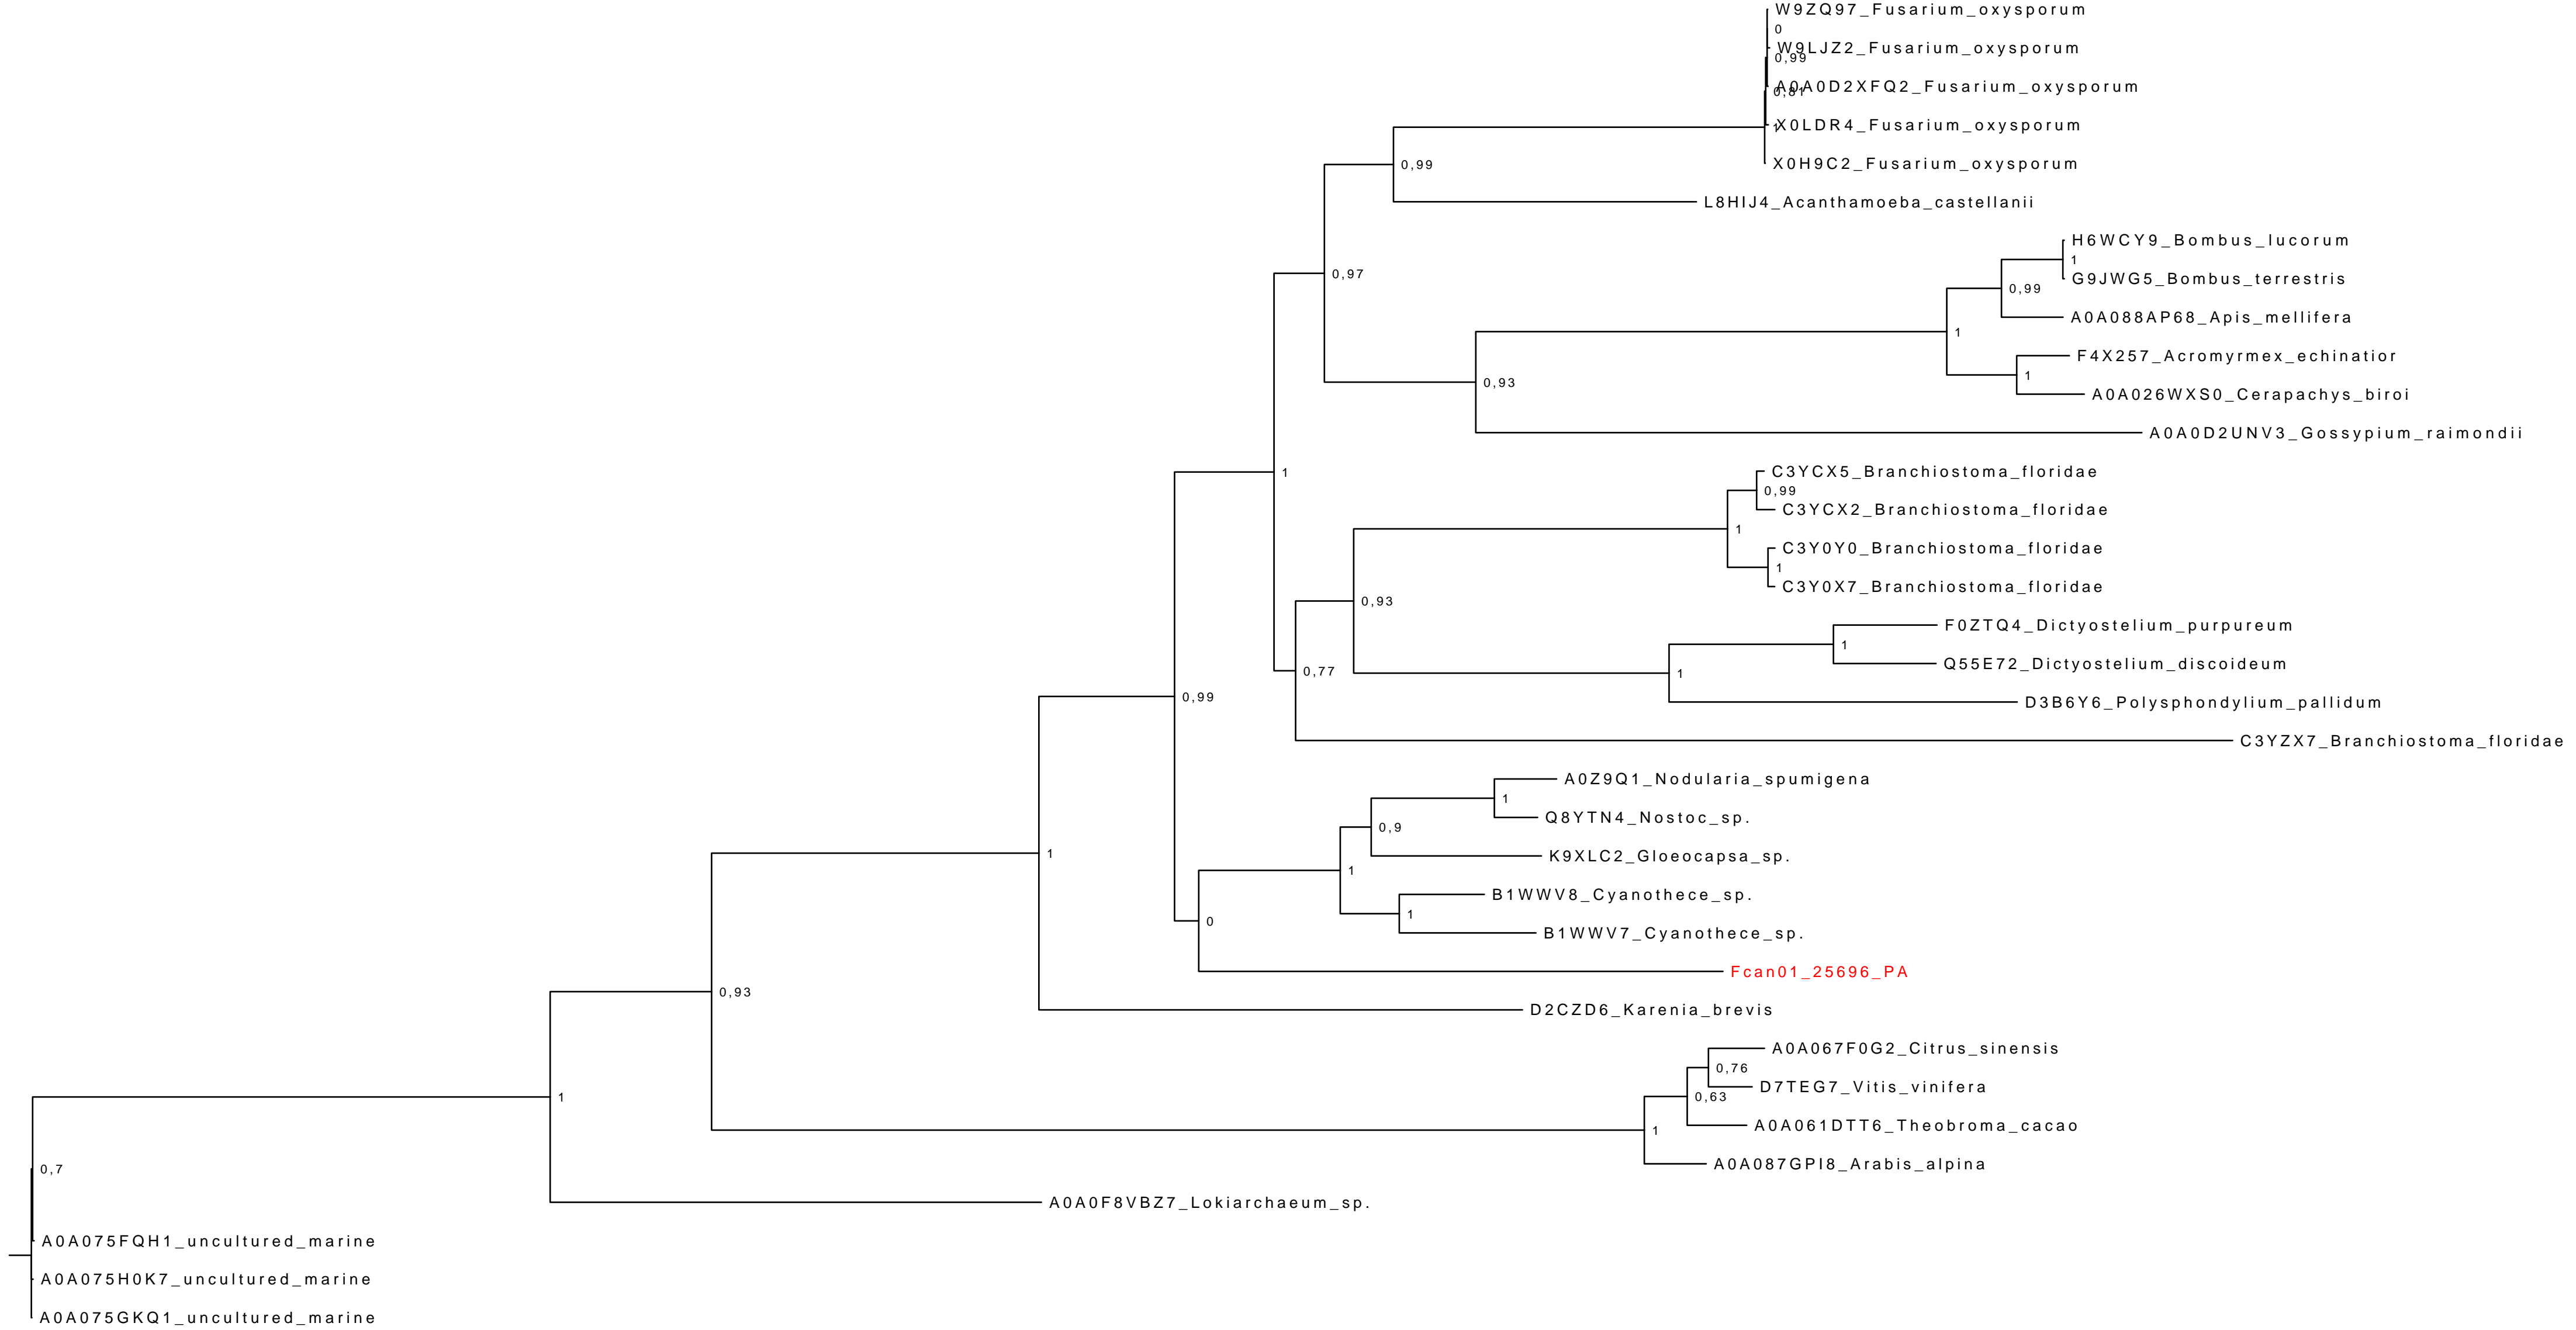



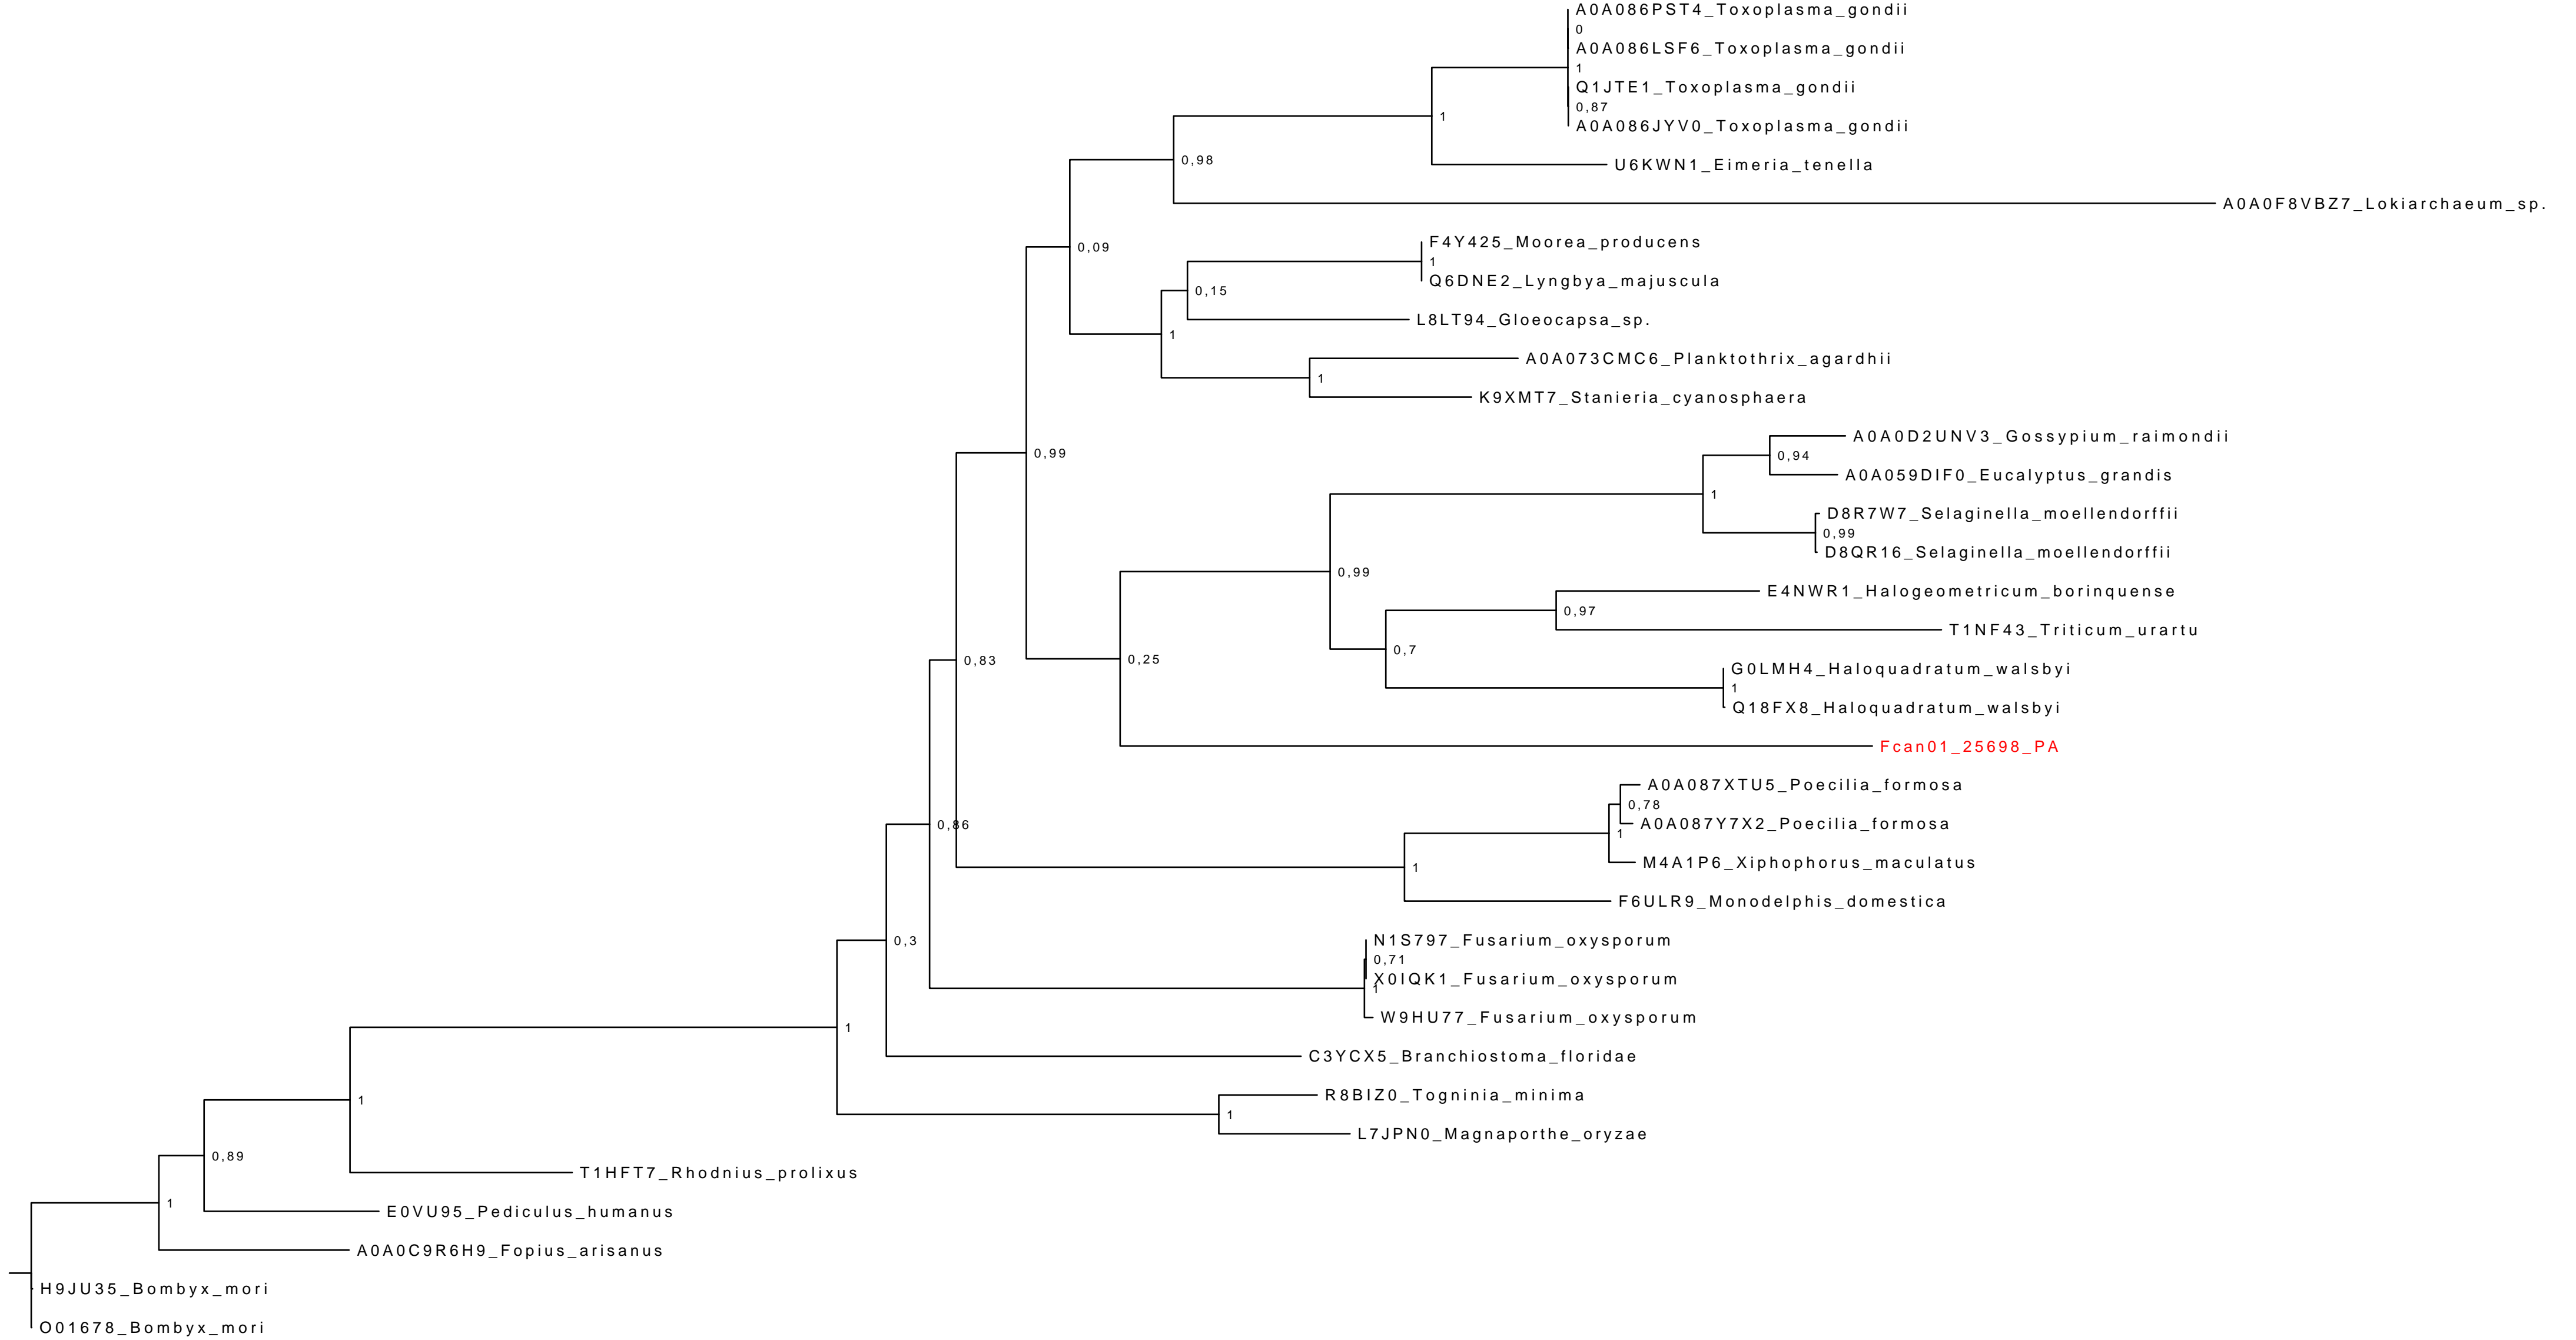

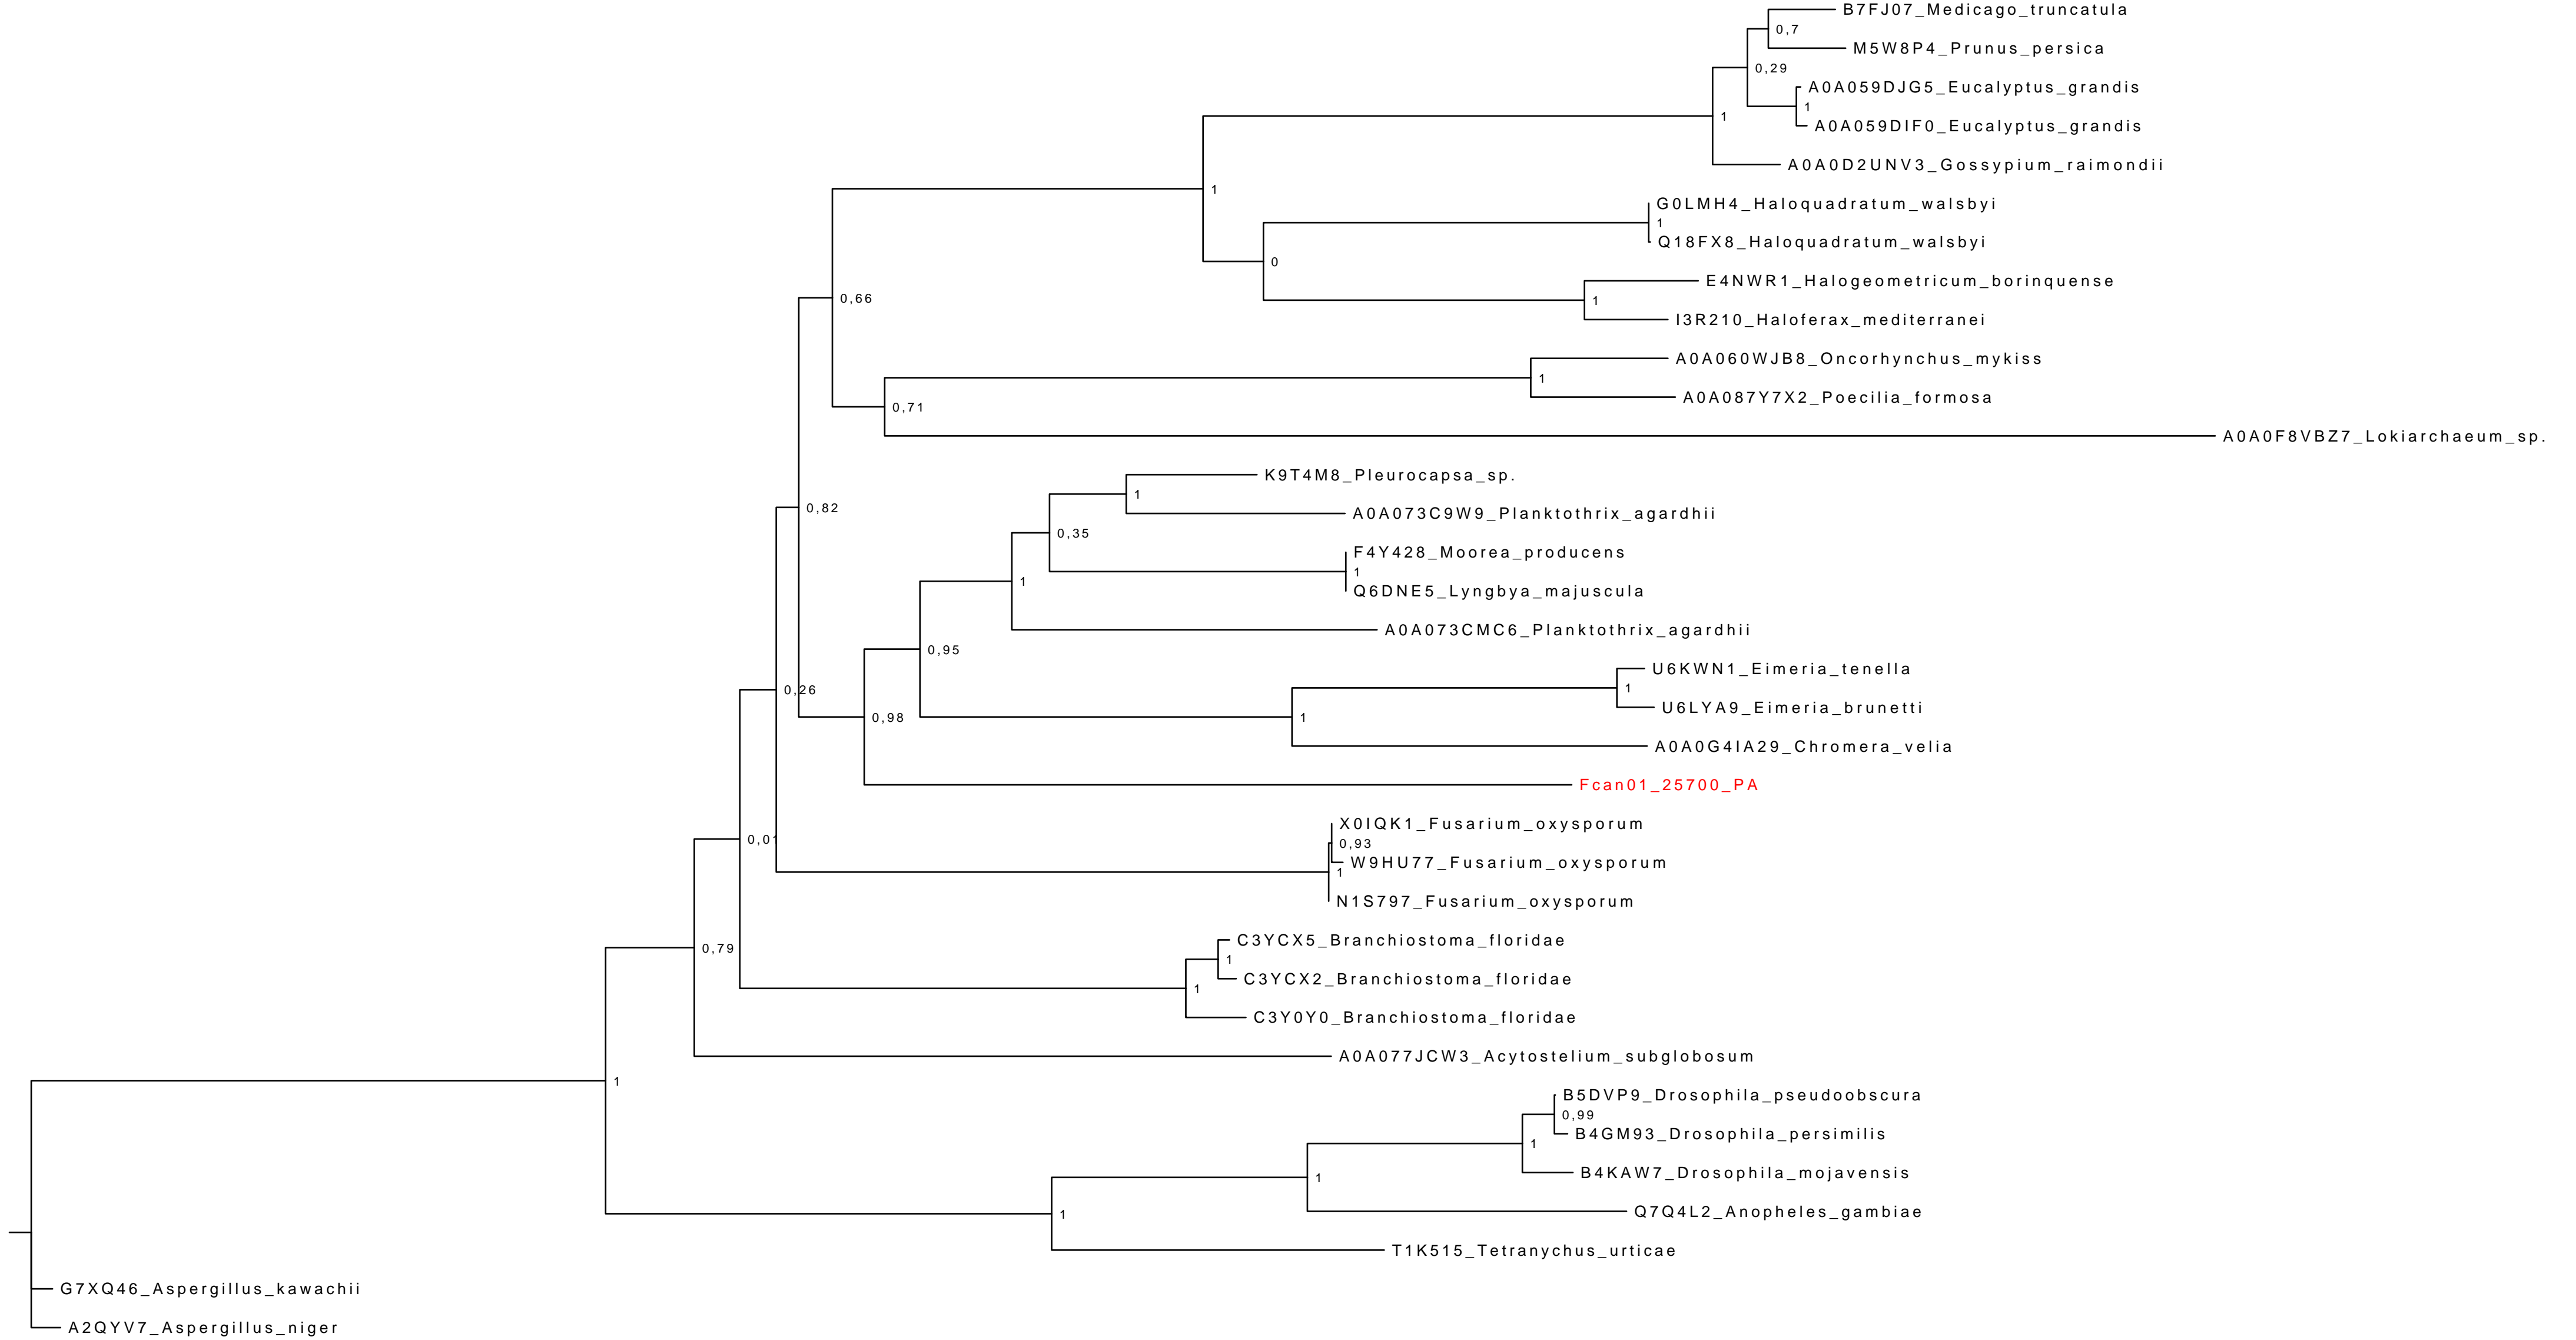

0.5

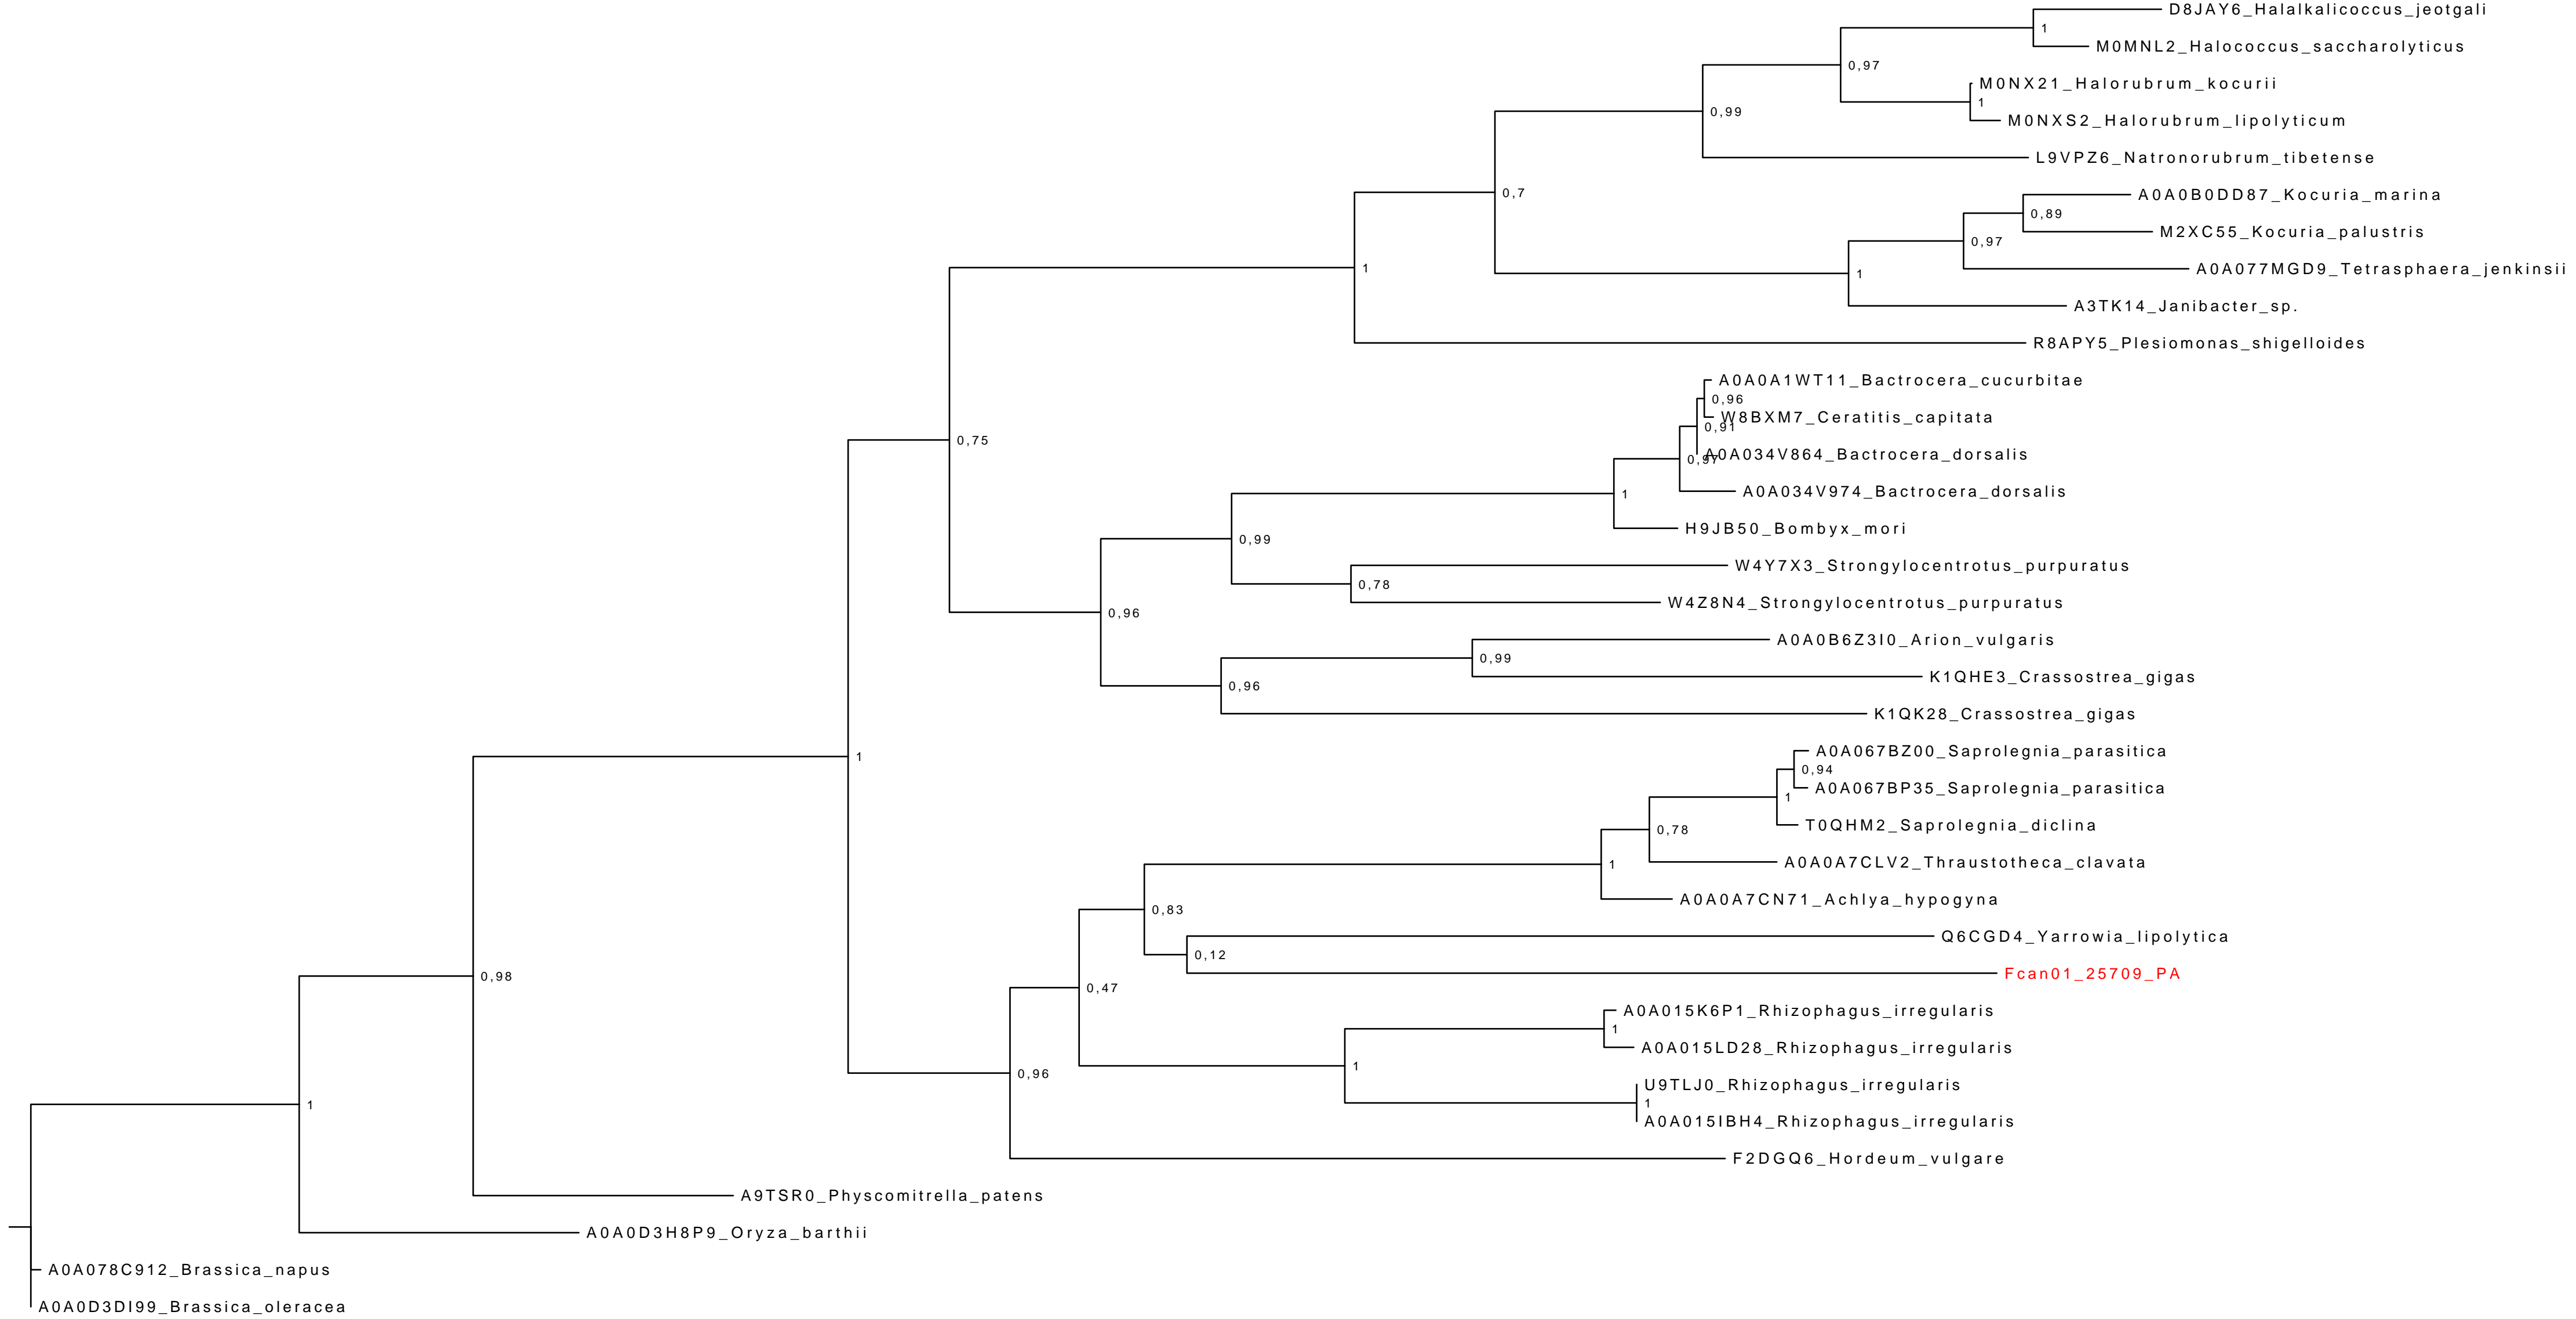

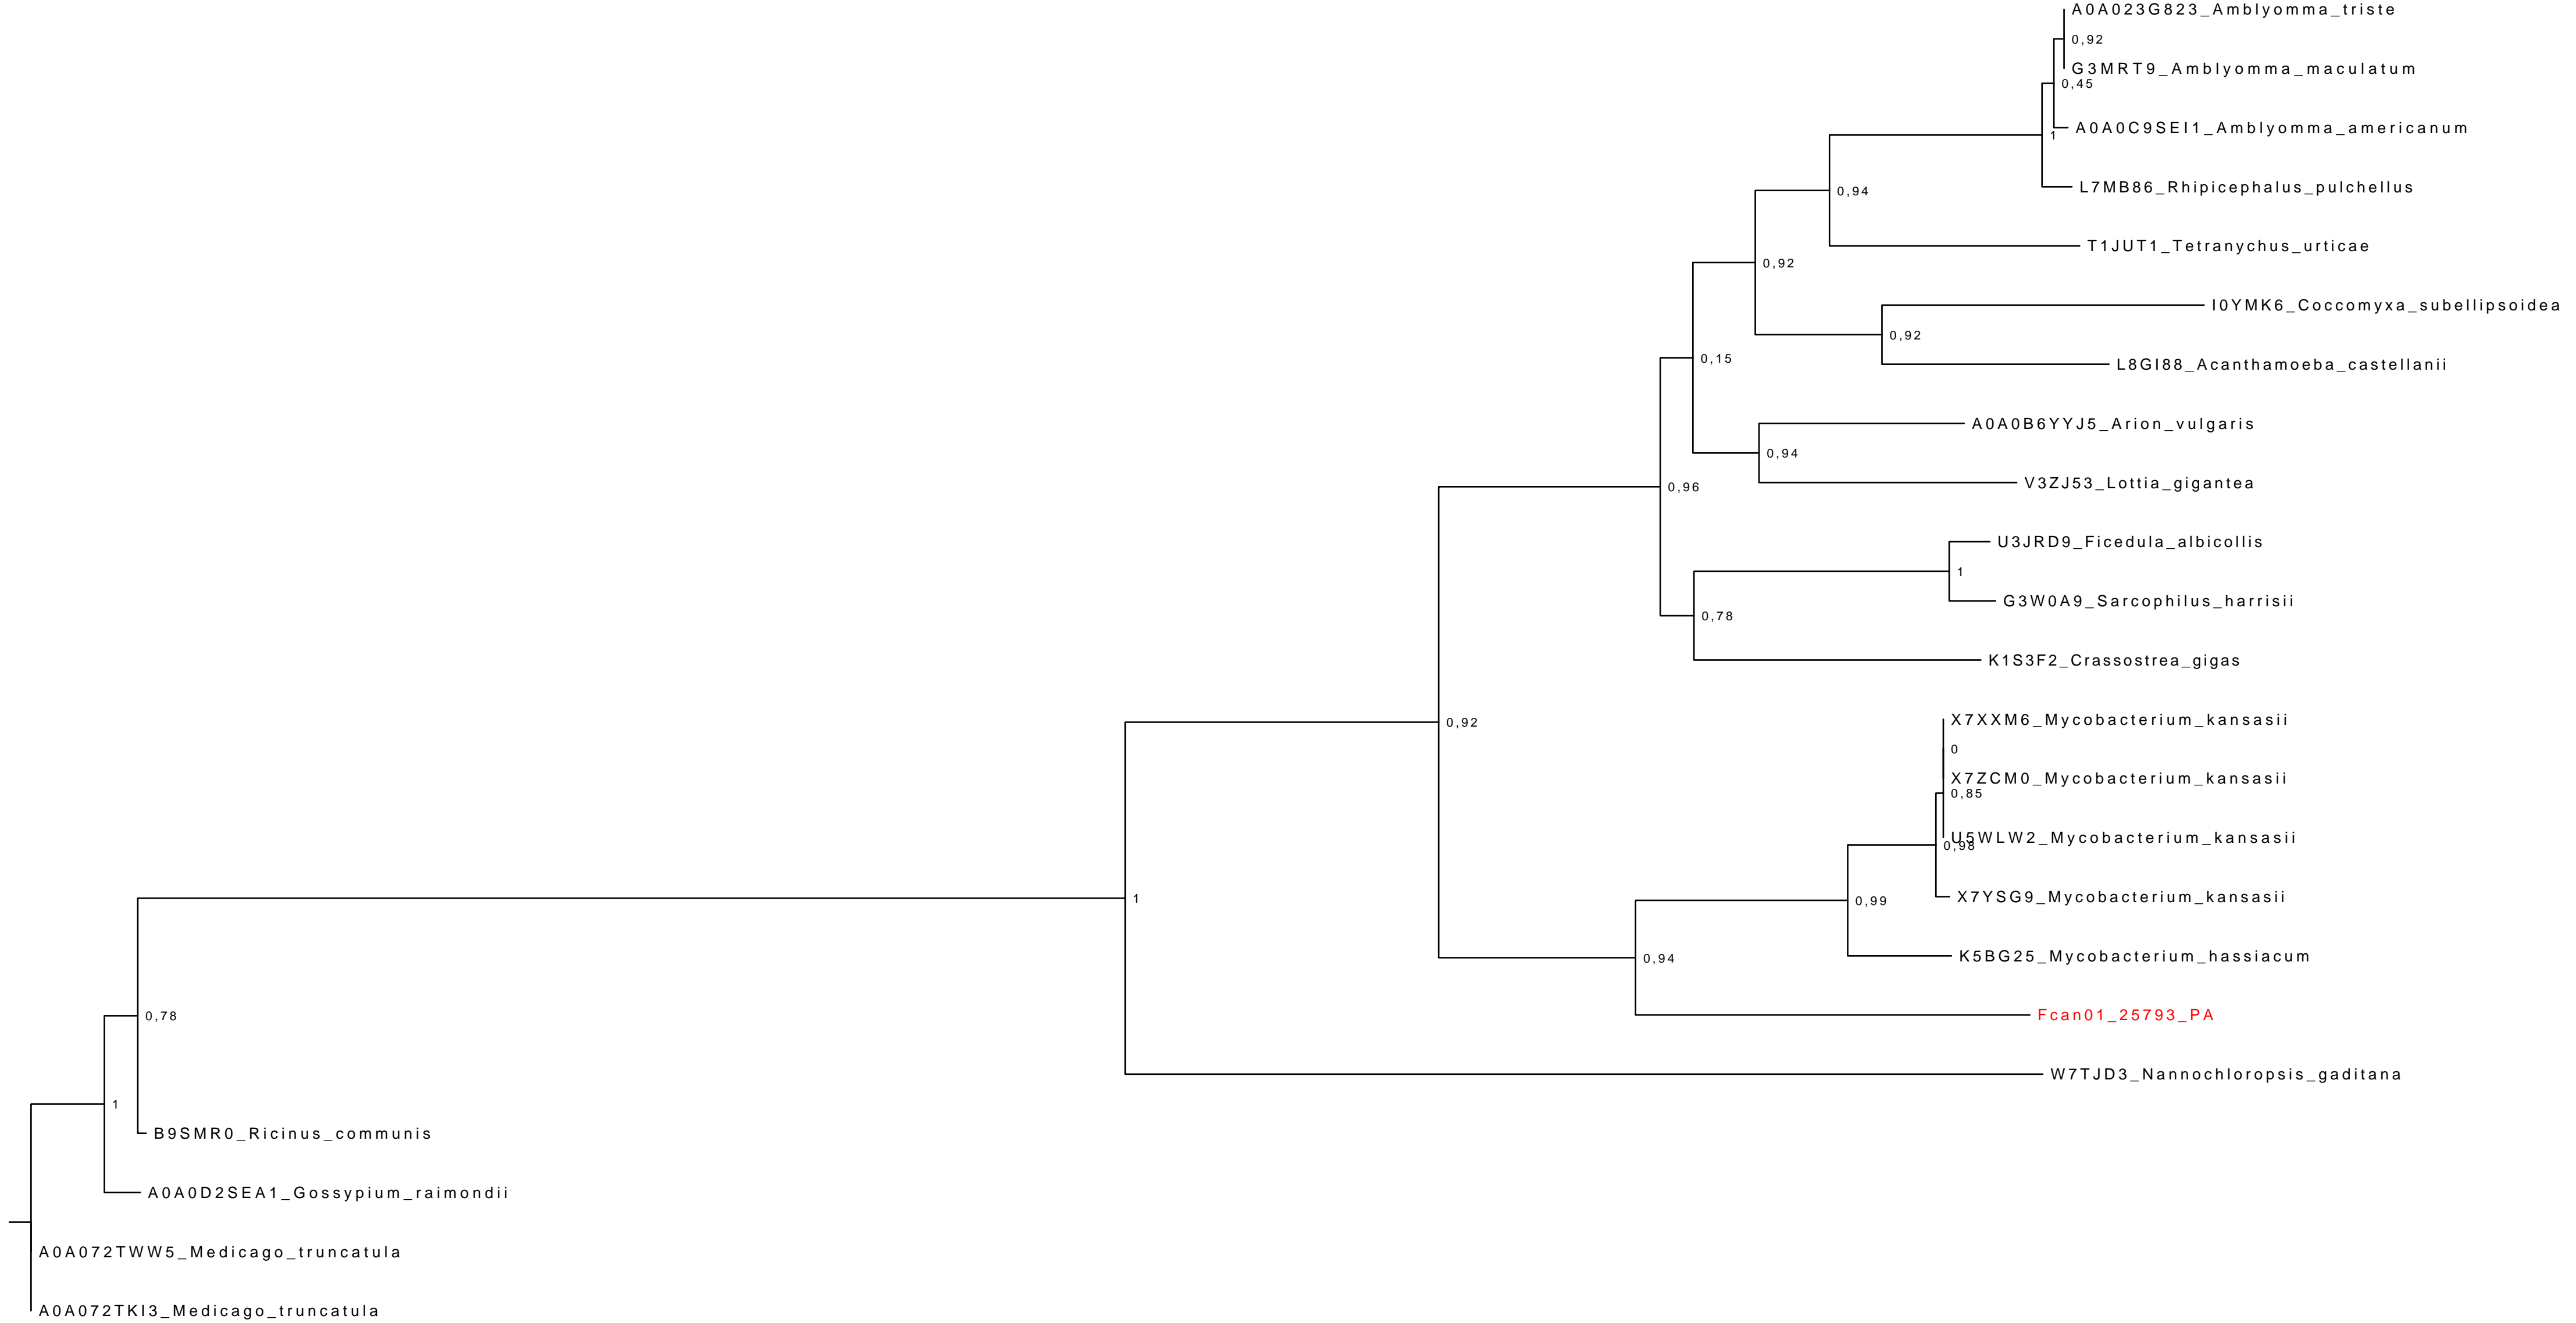

0.5

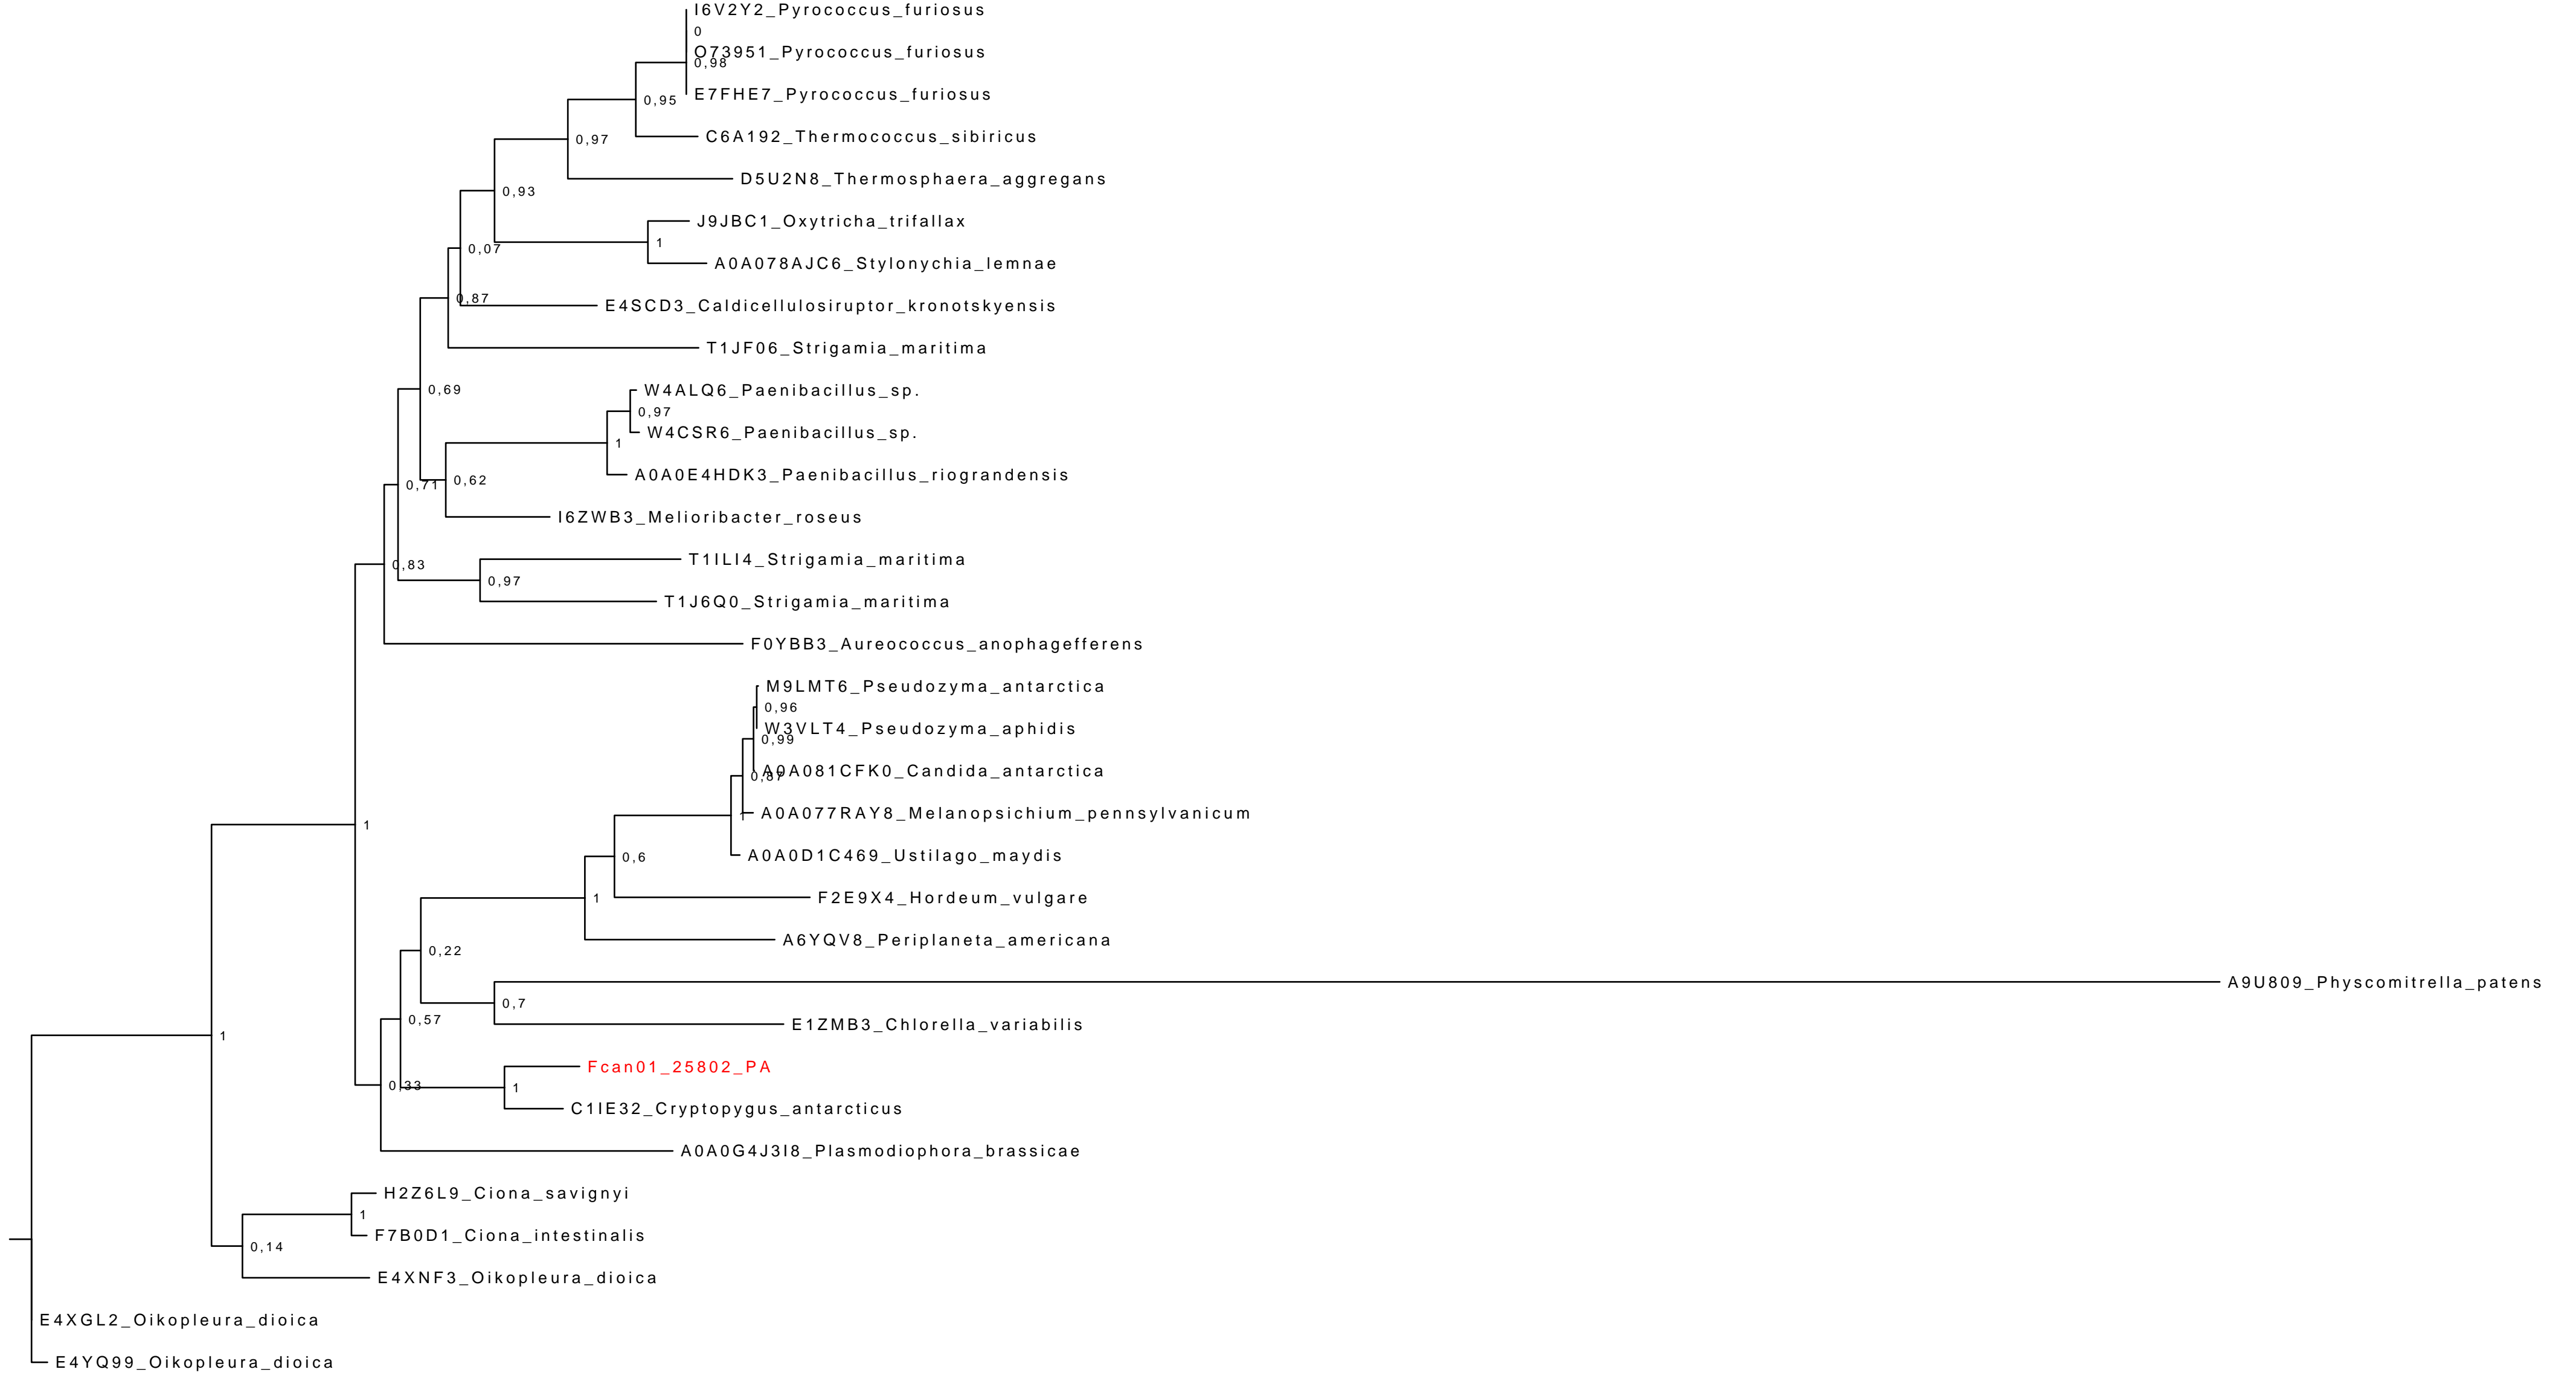

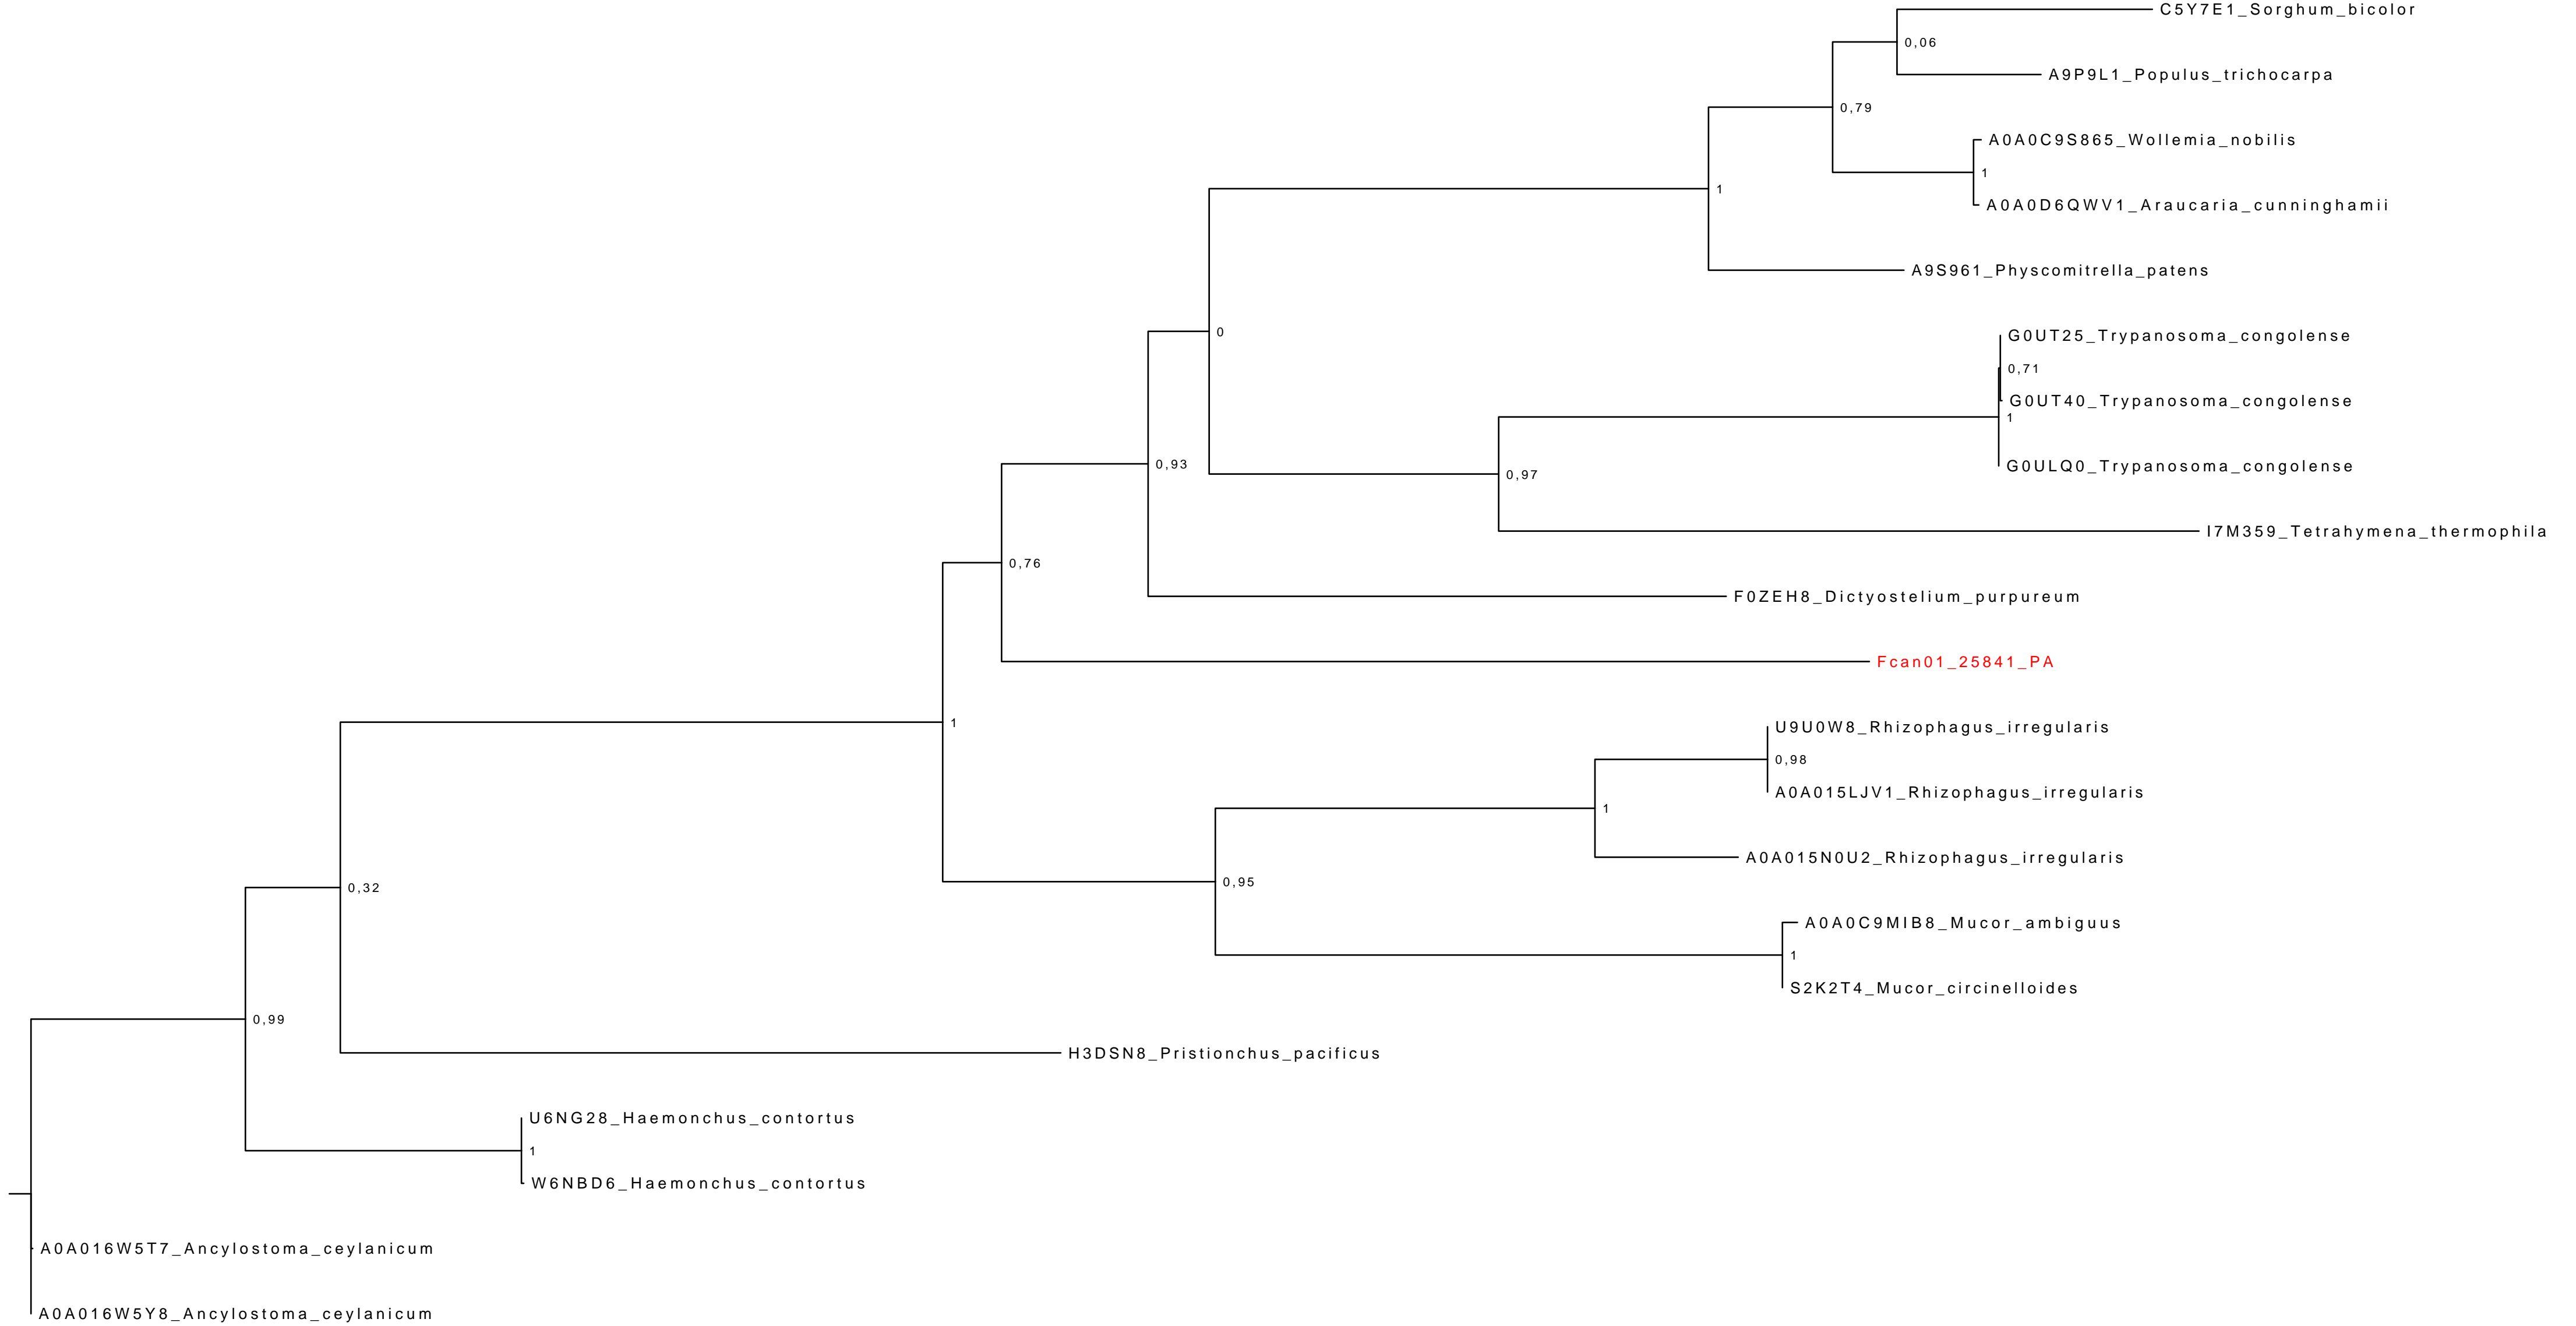

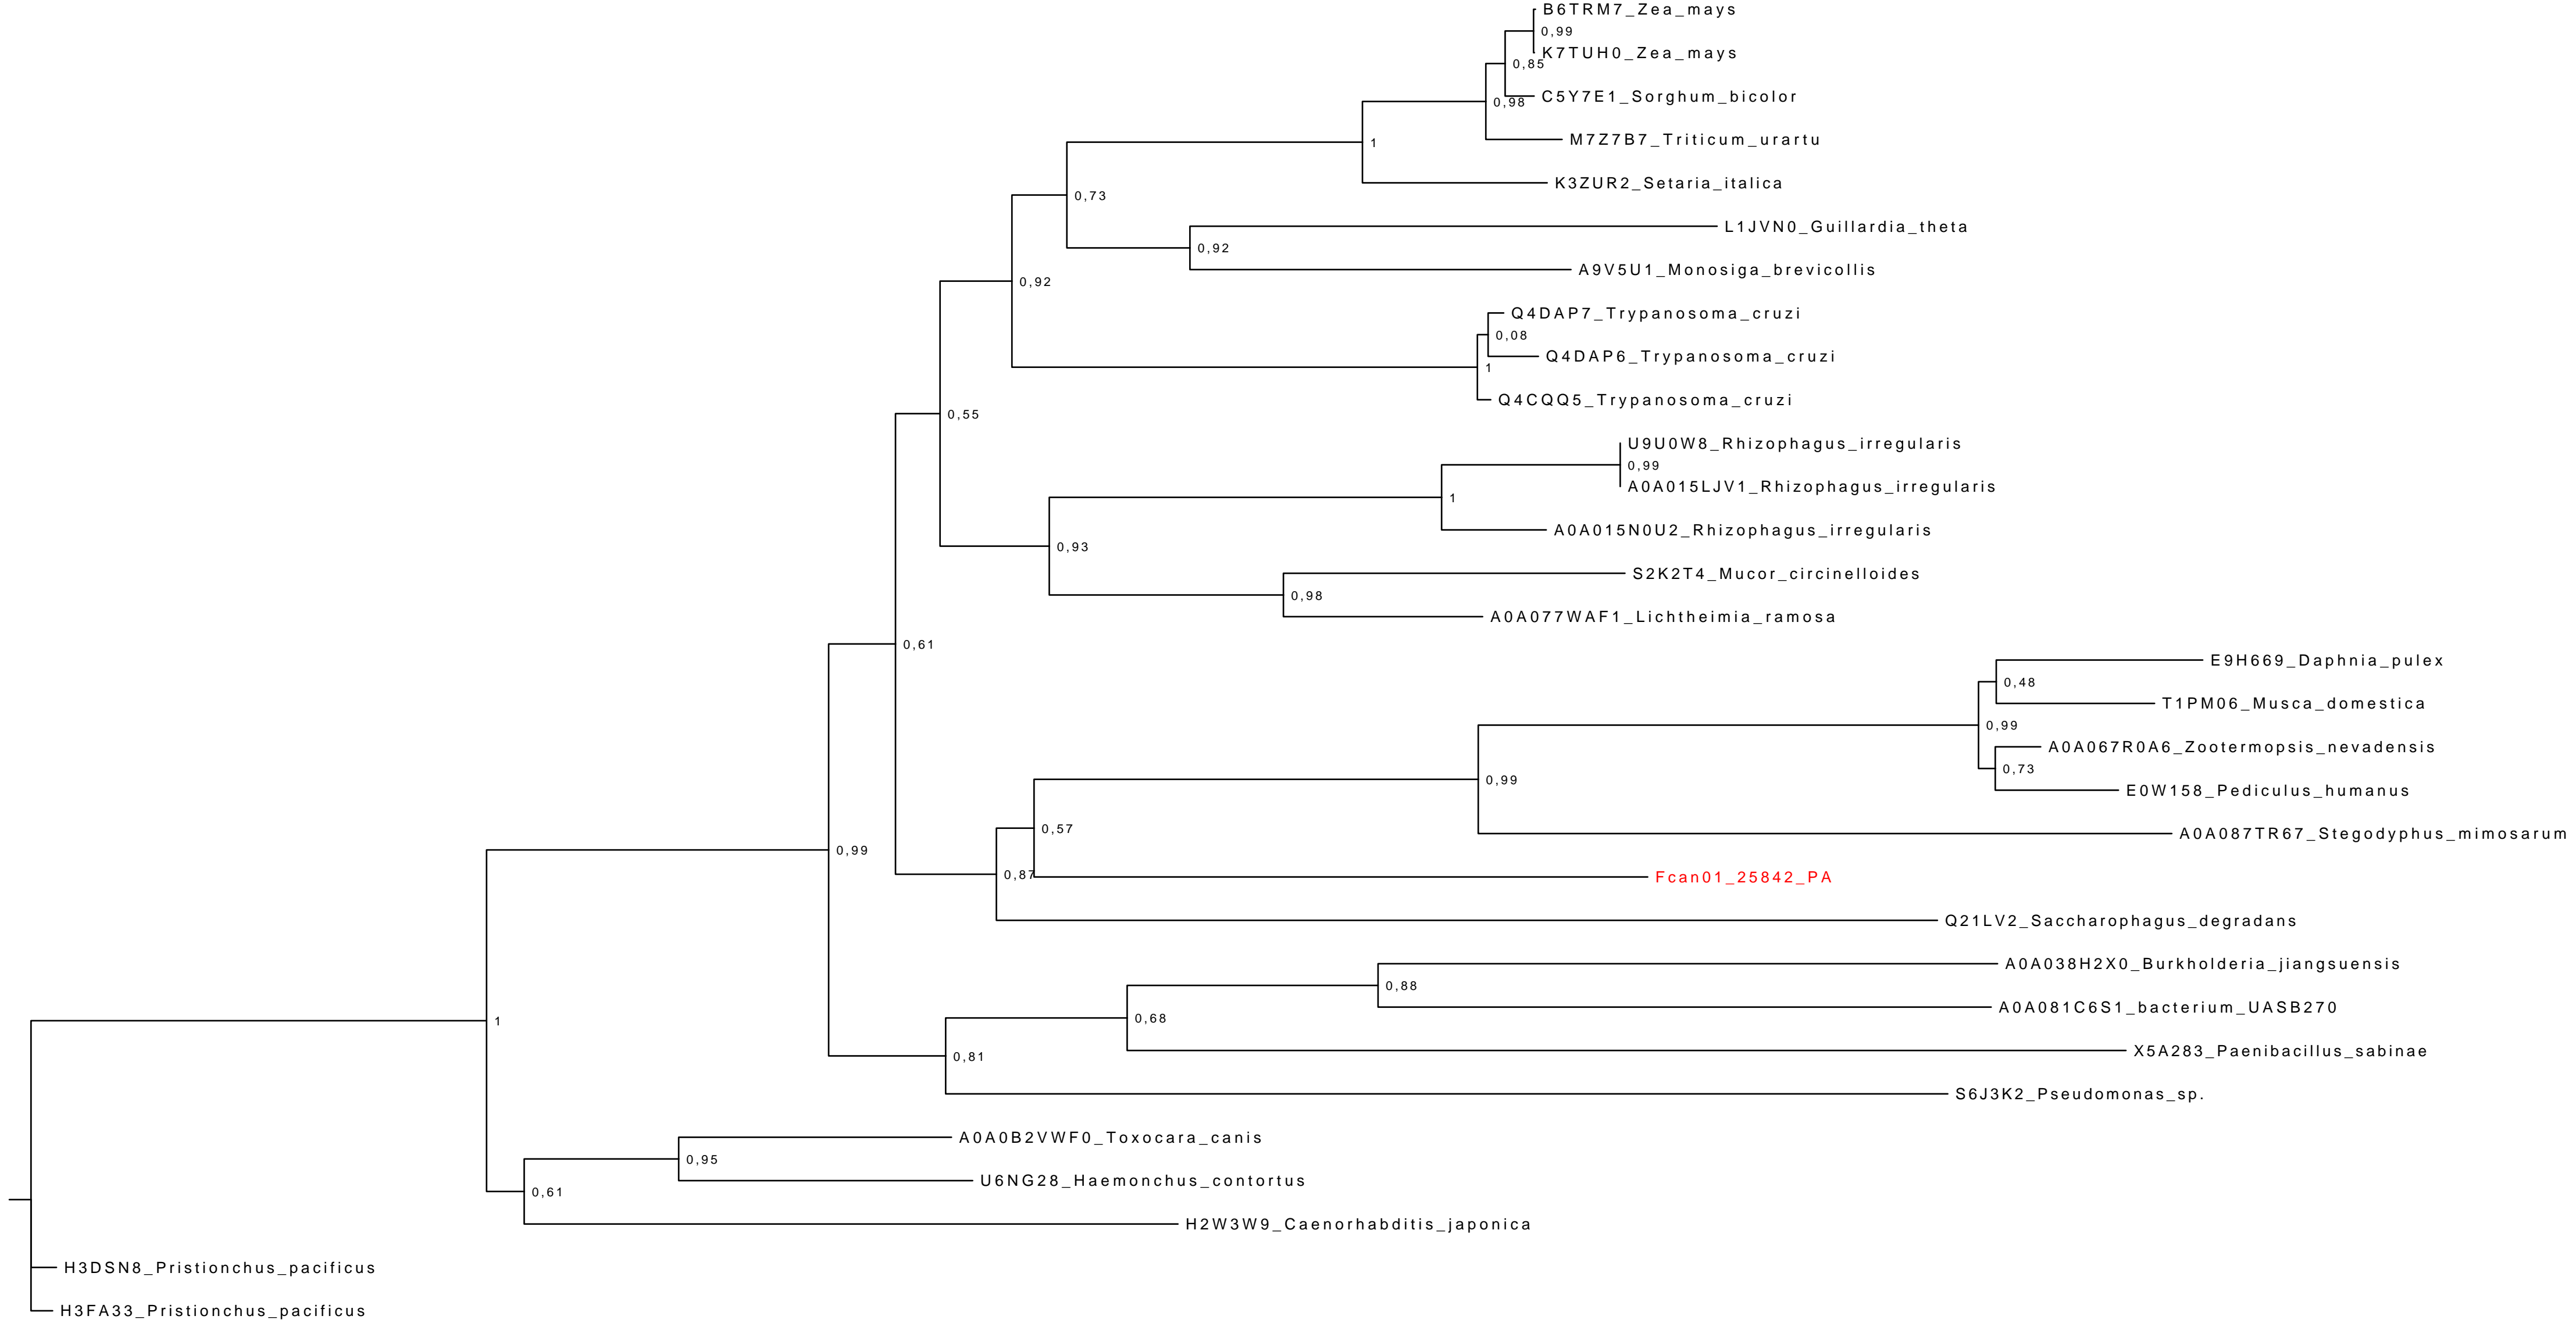

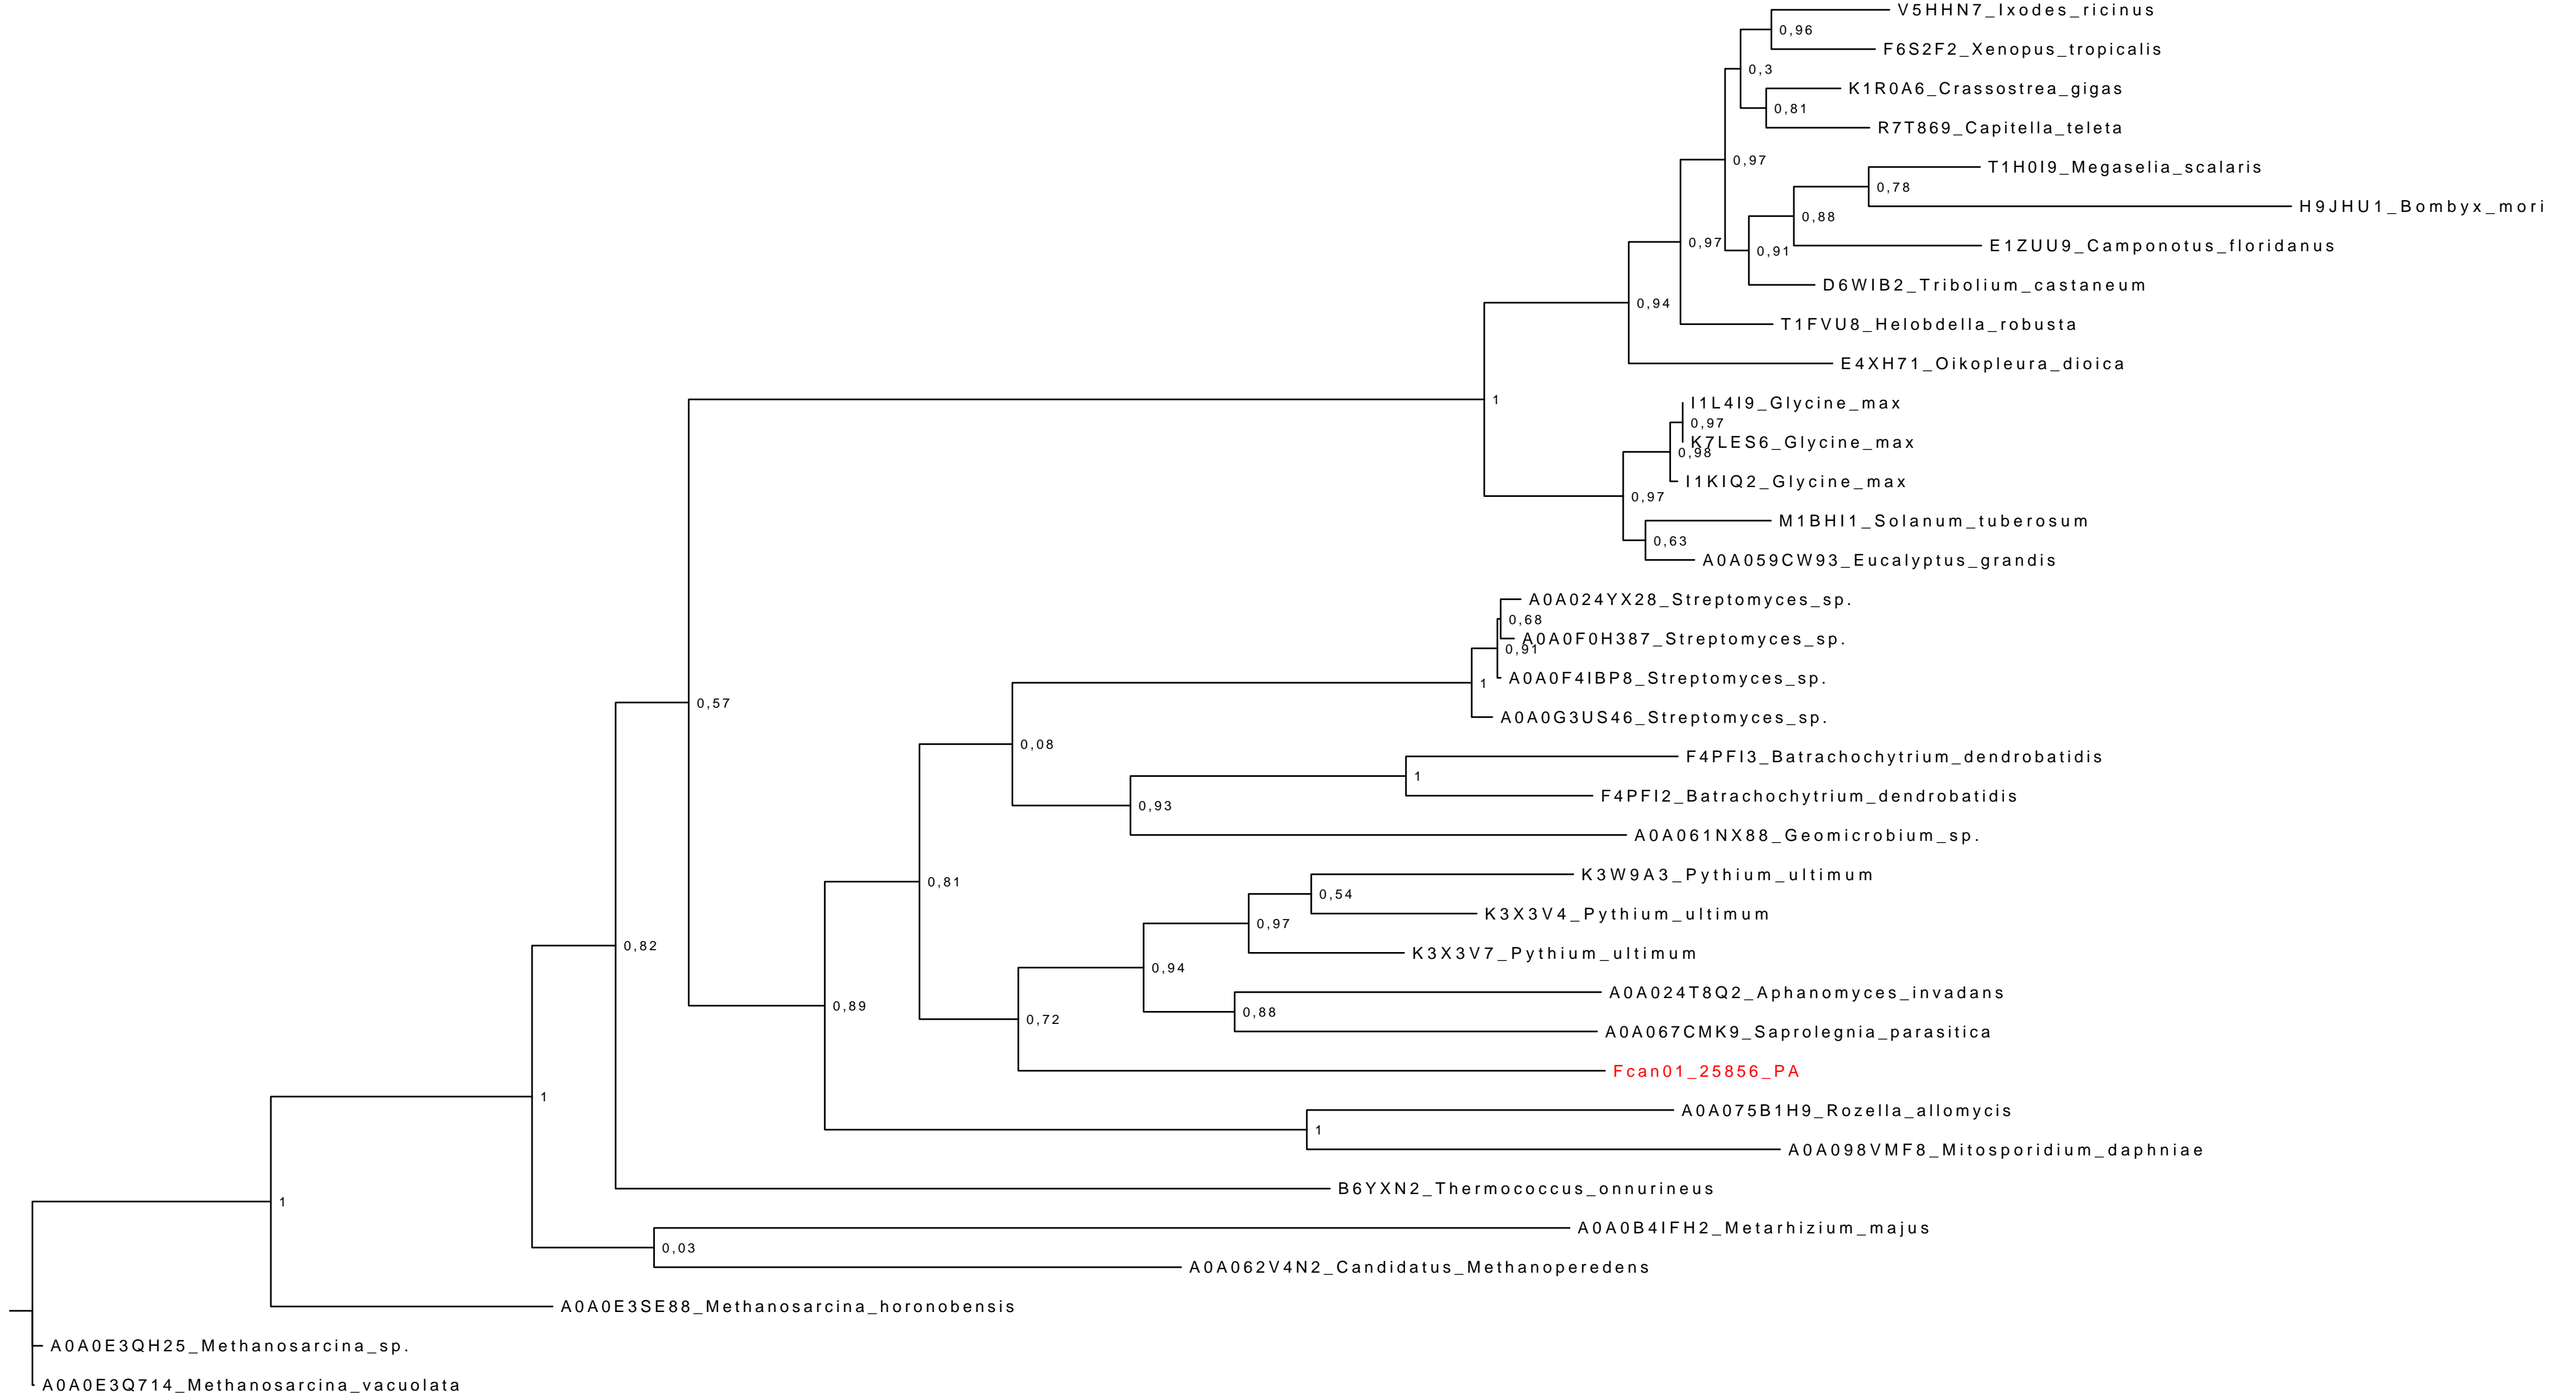

0.6



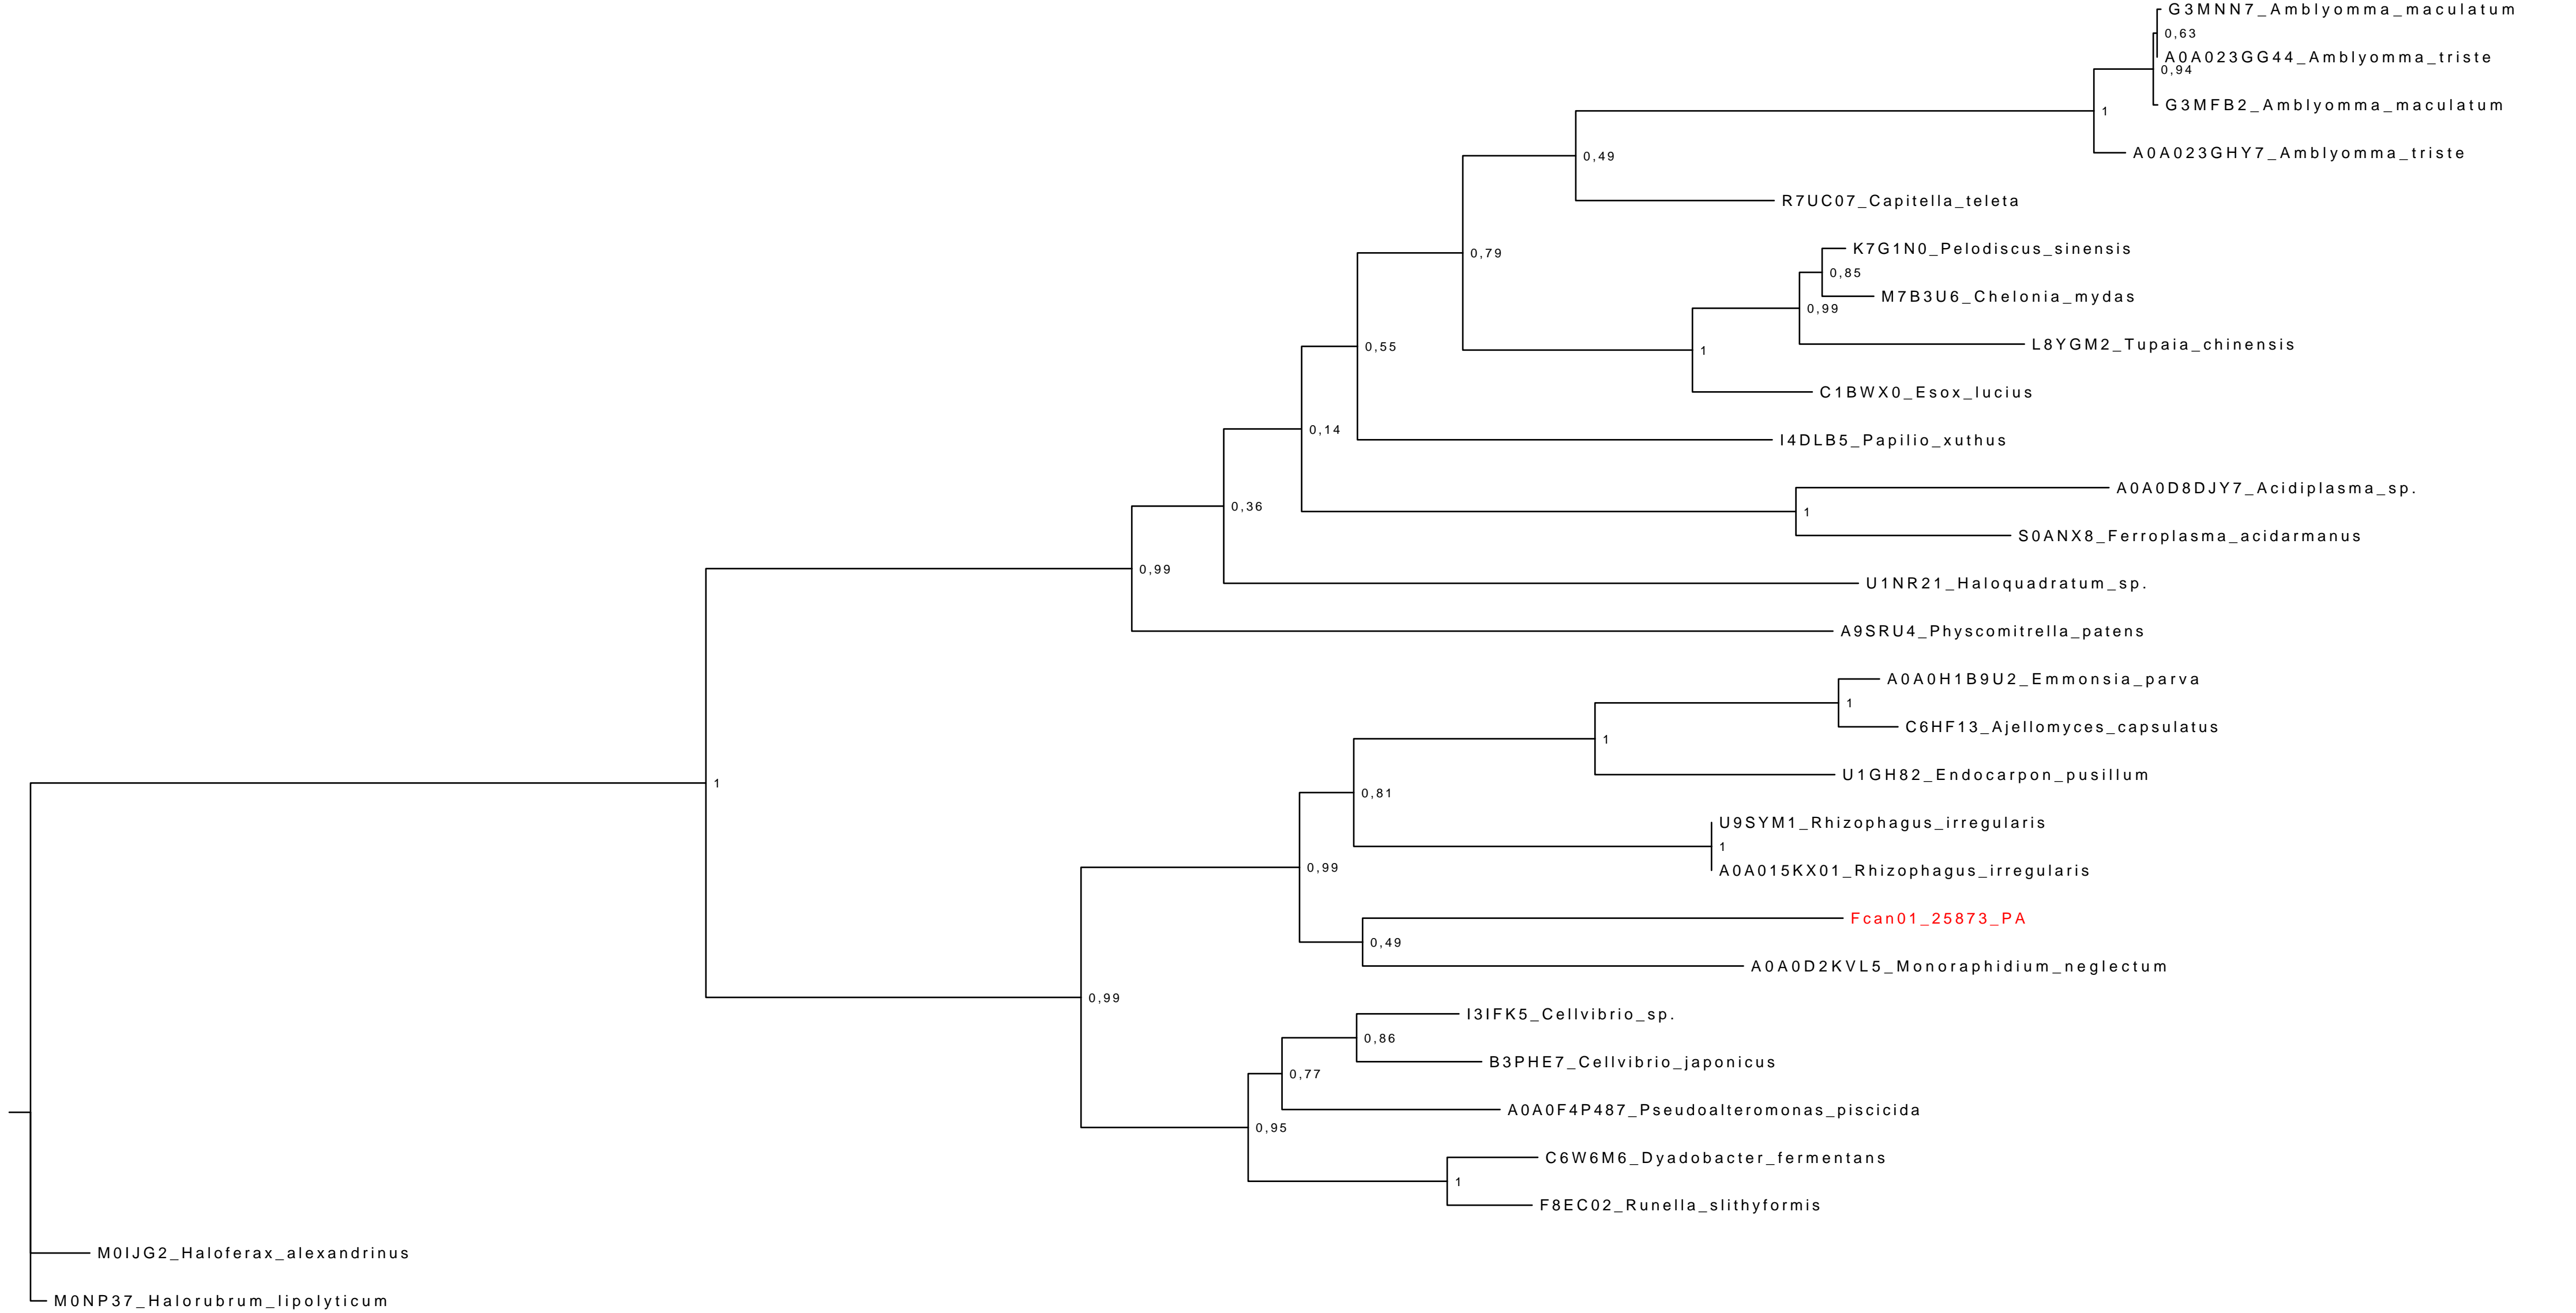

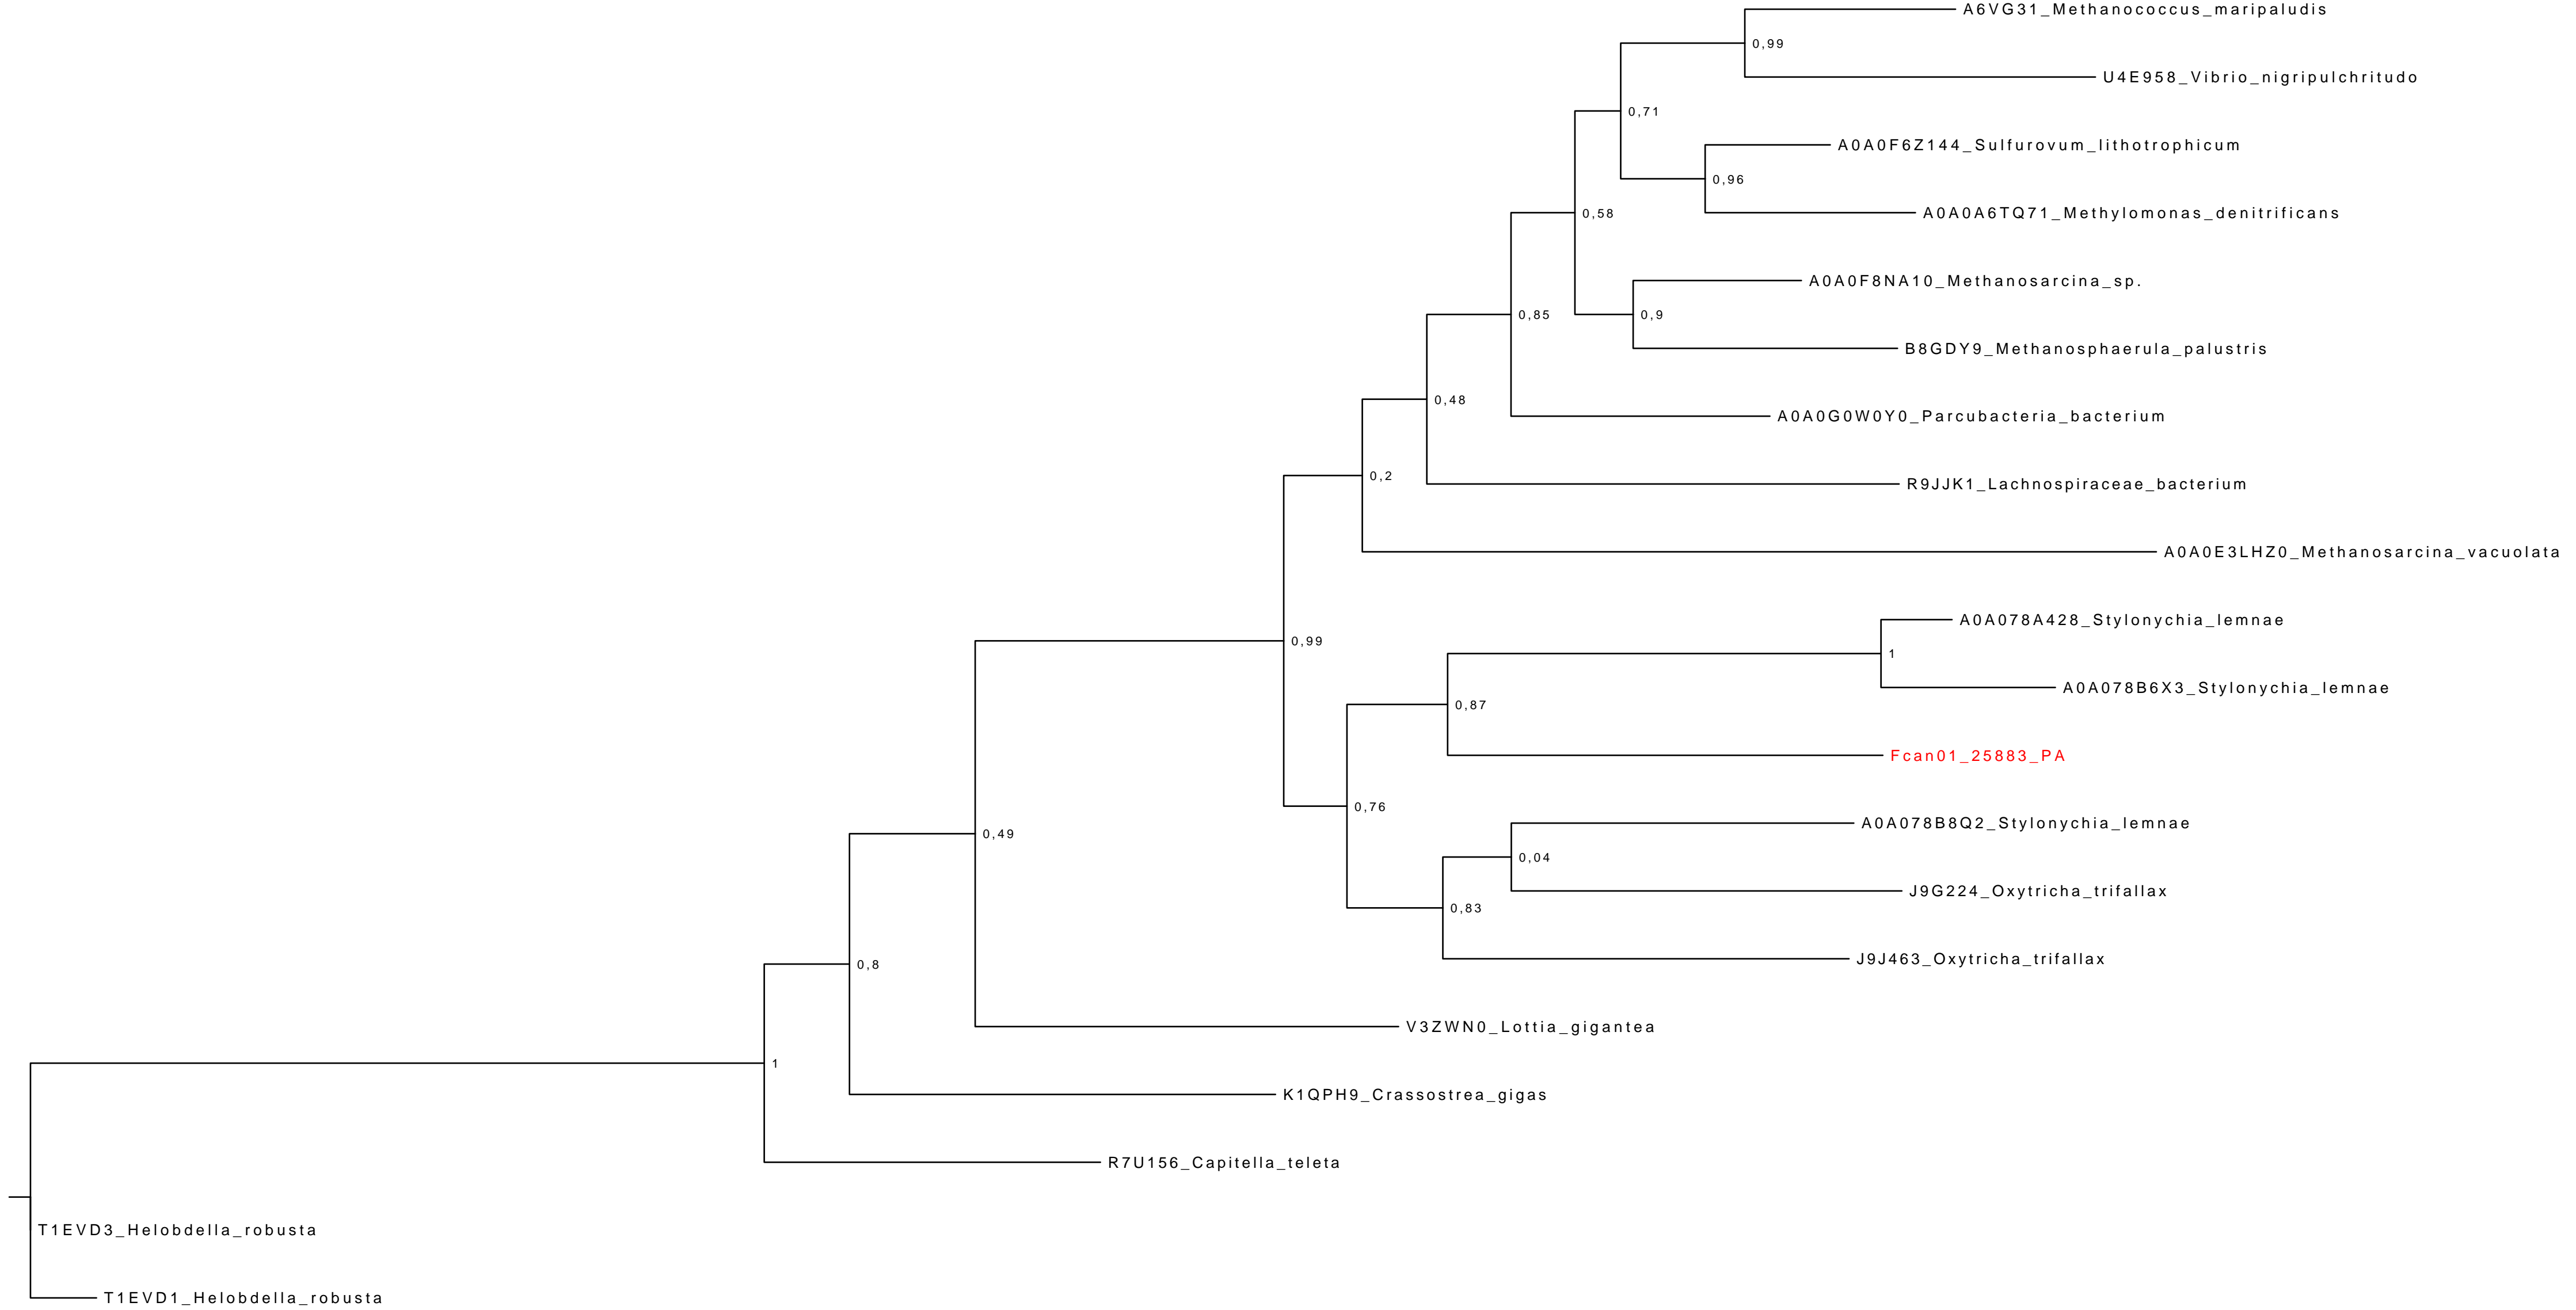

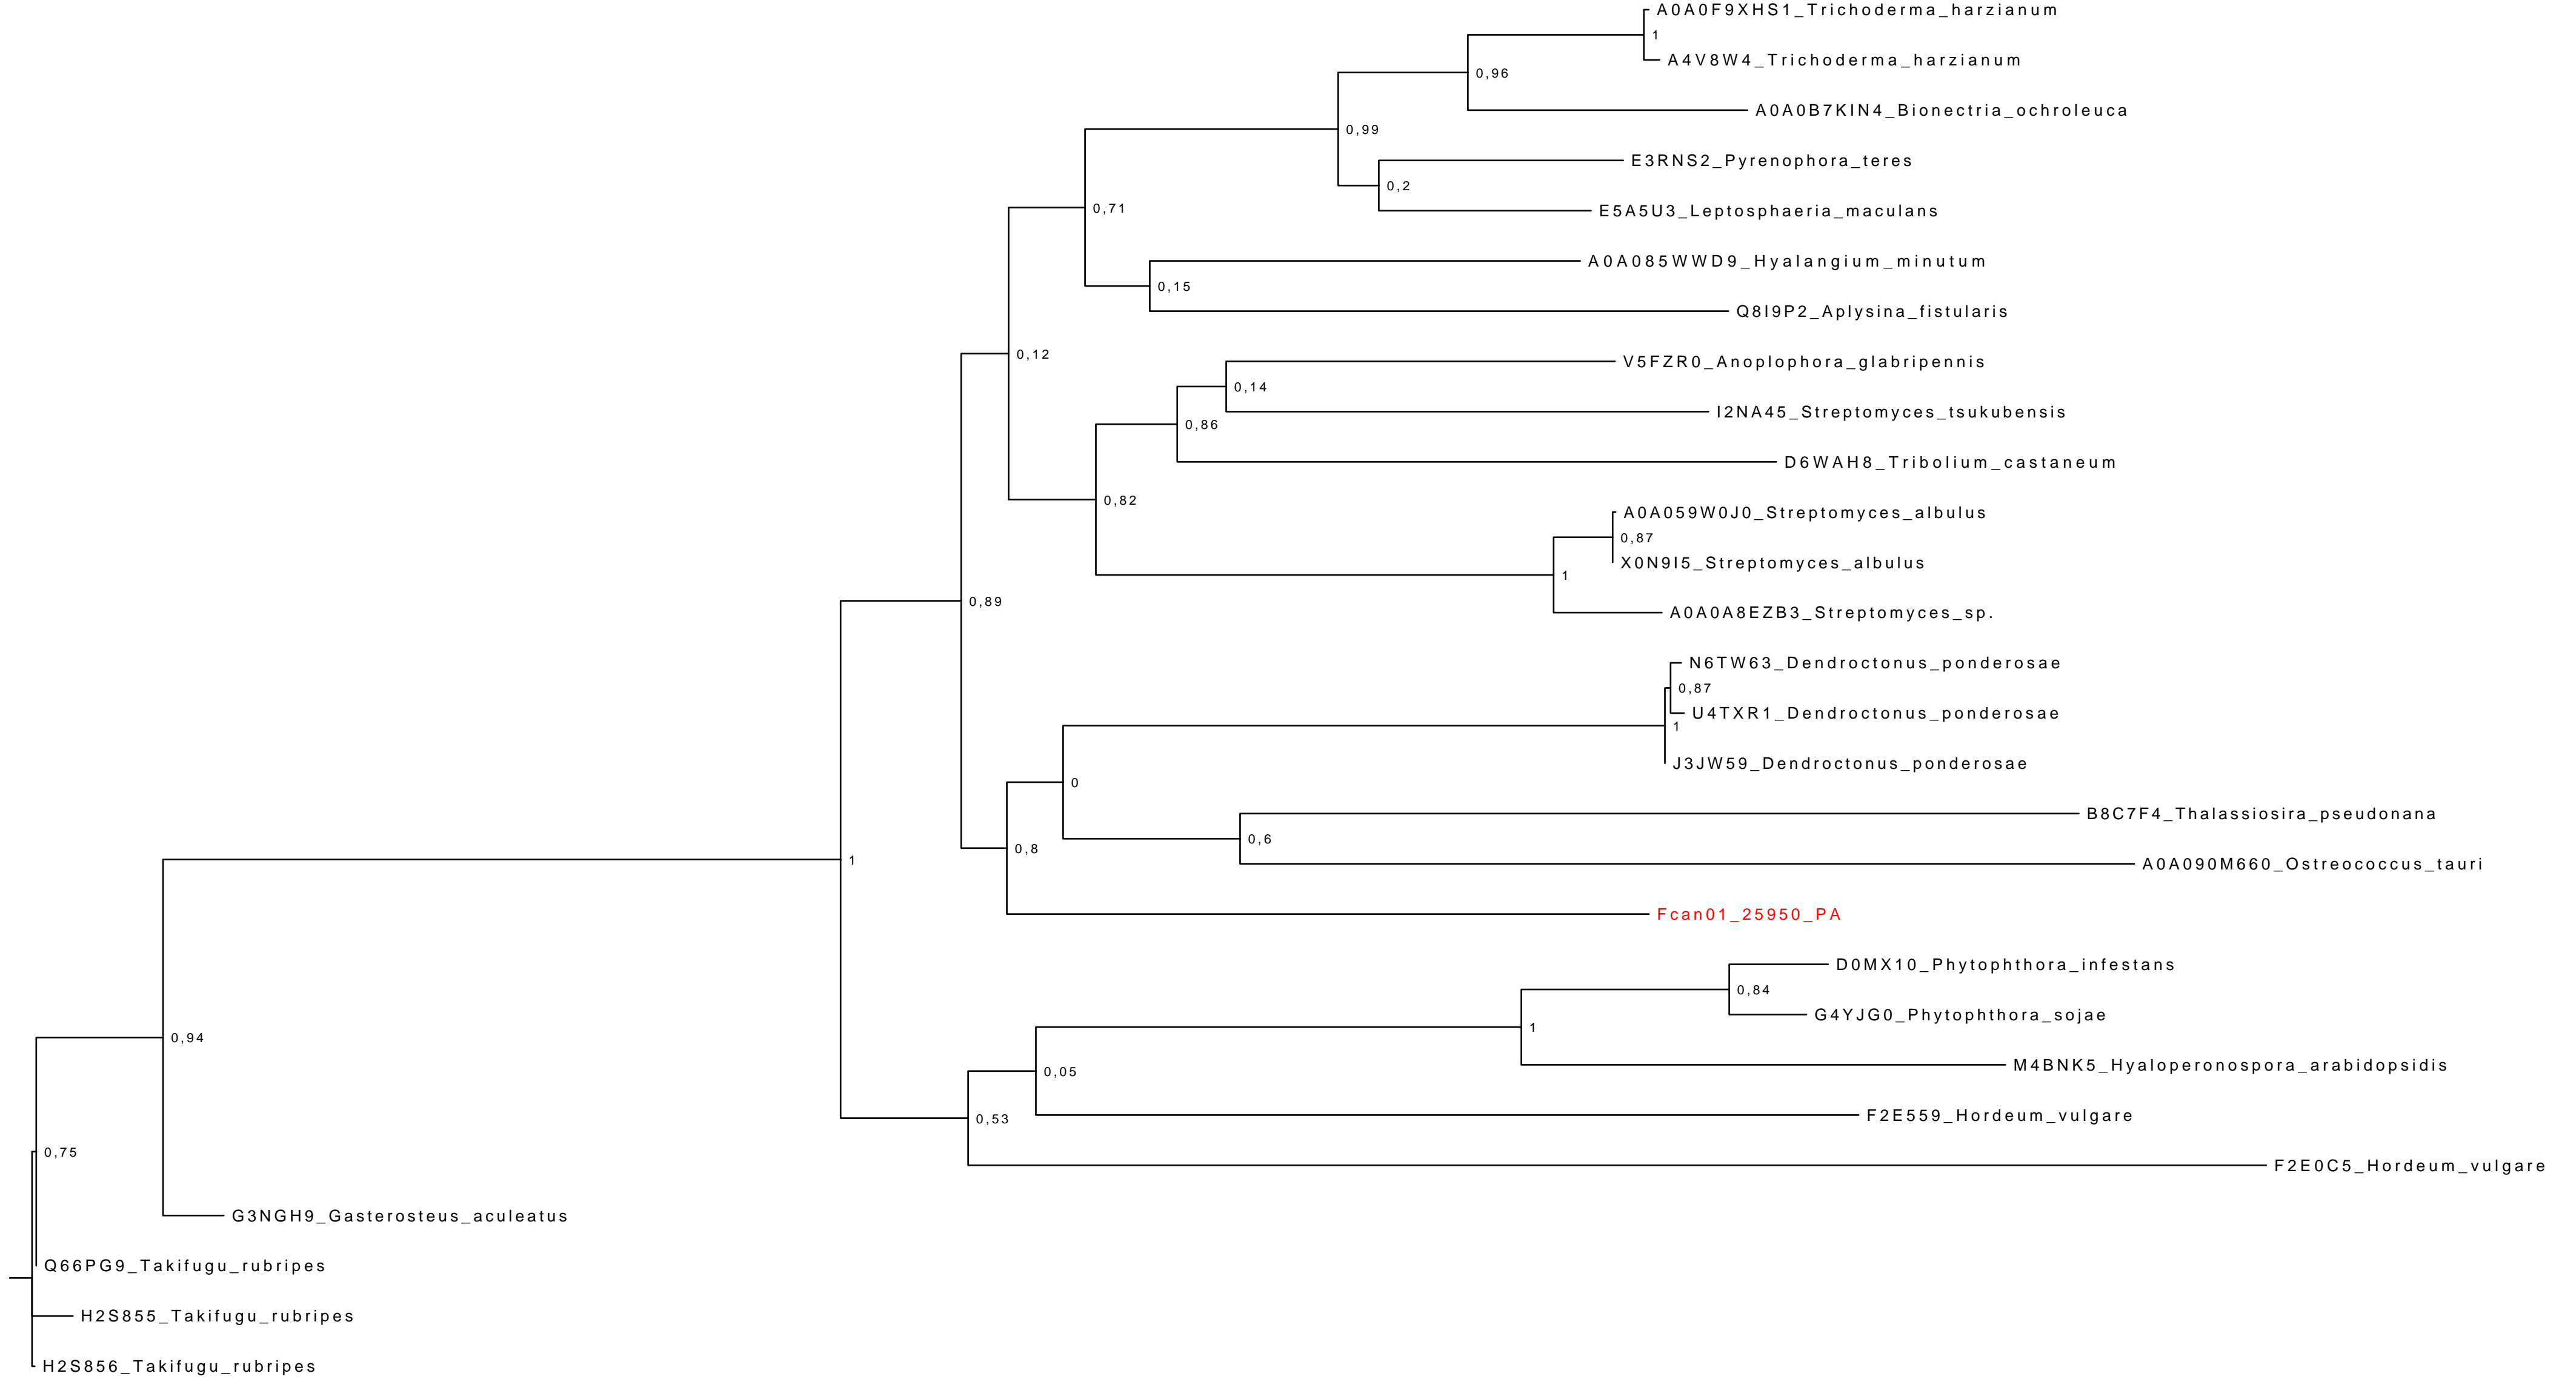

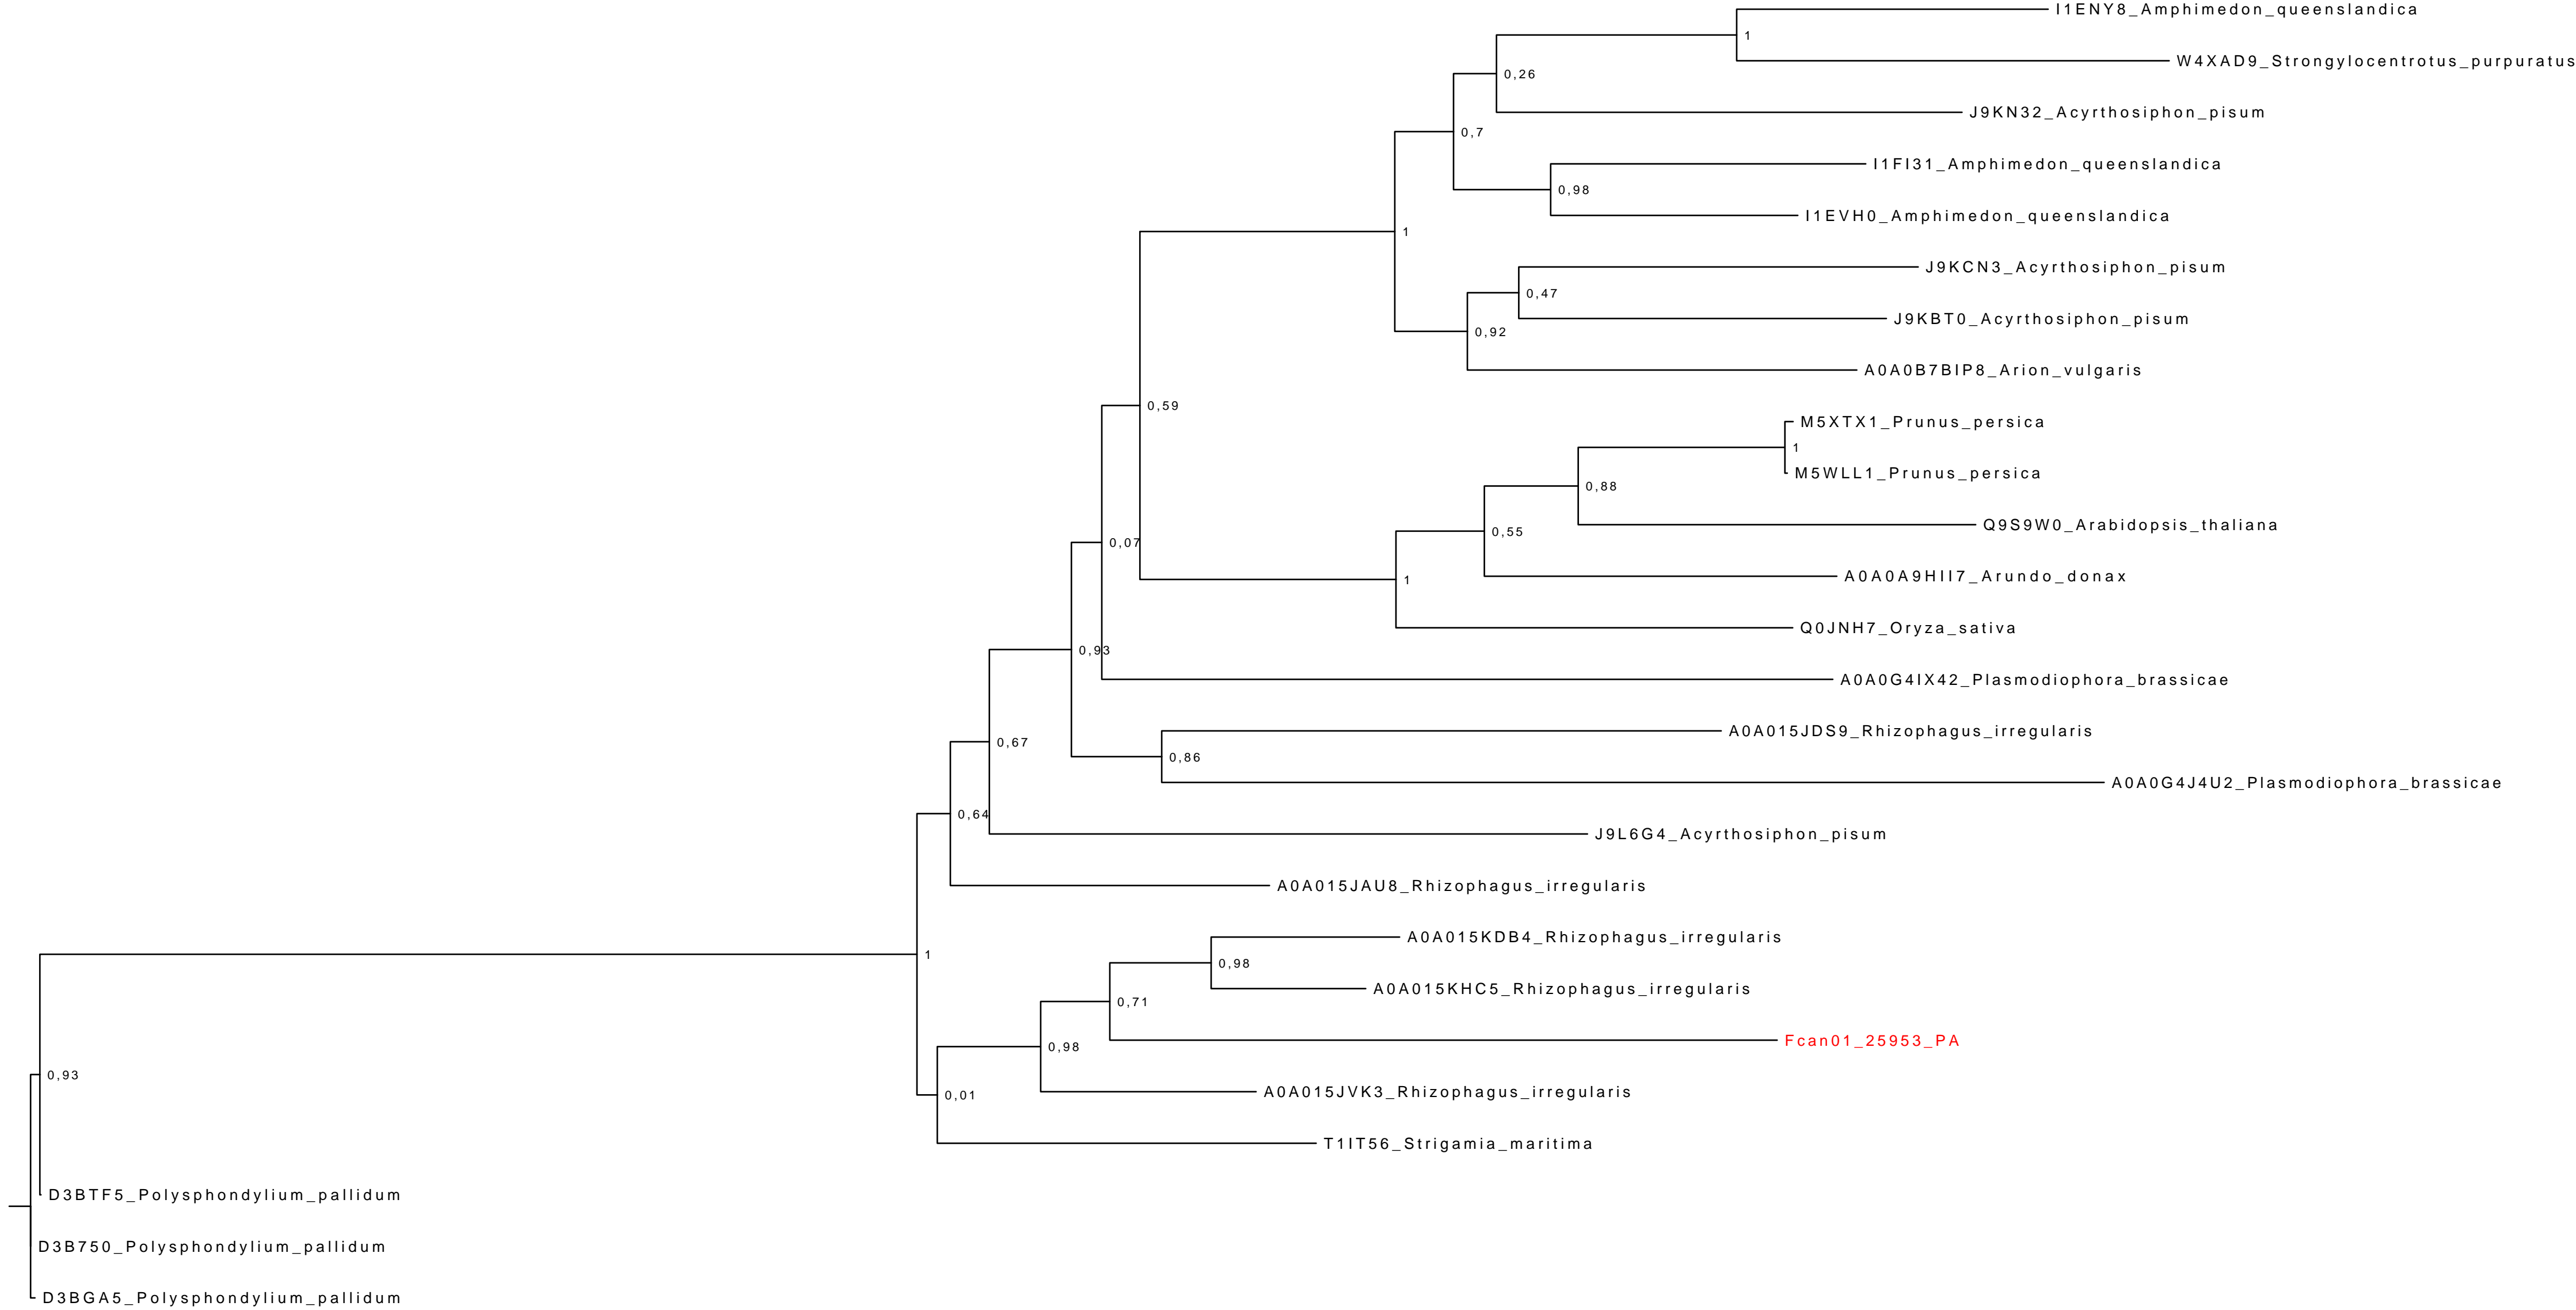

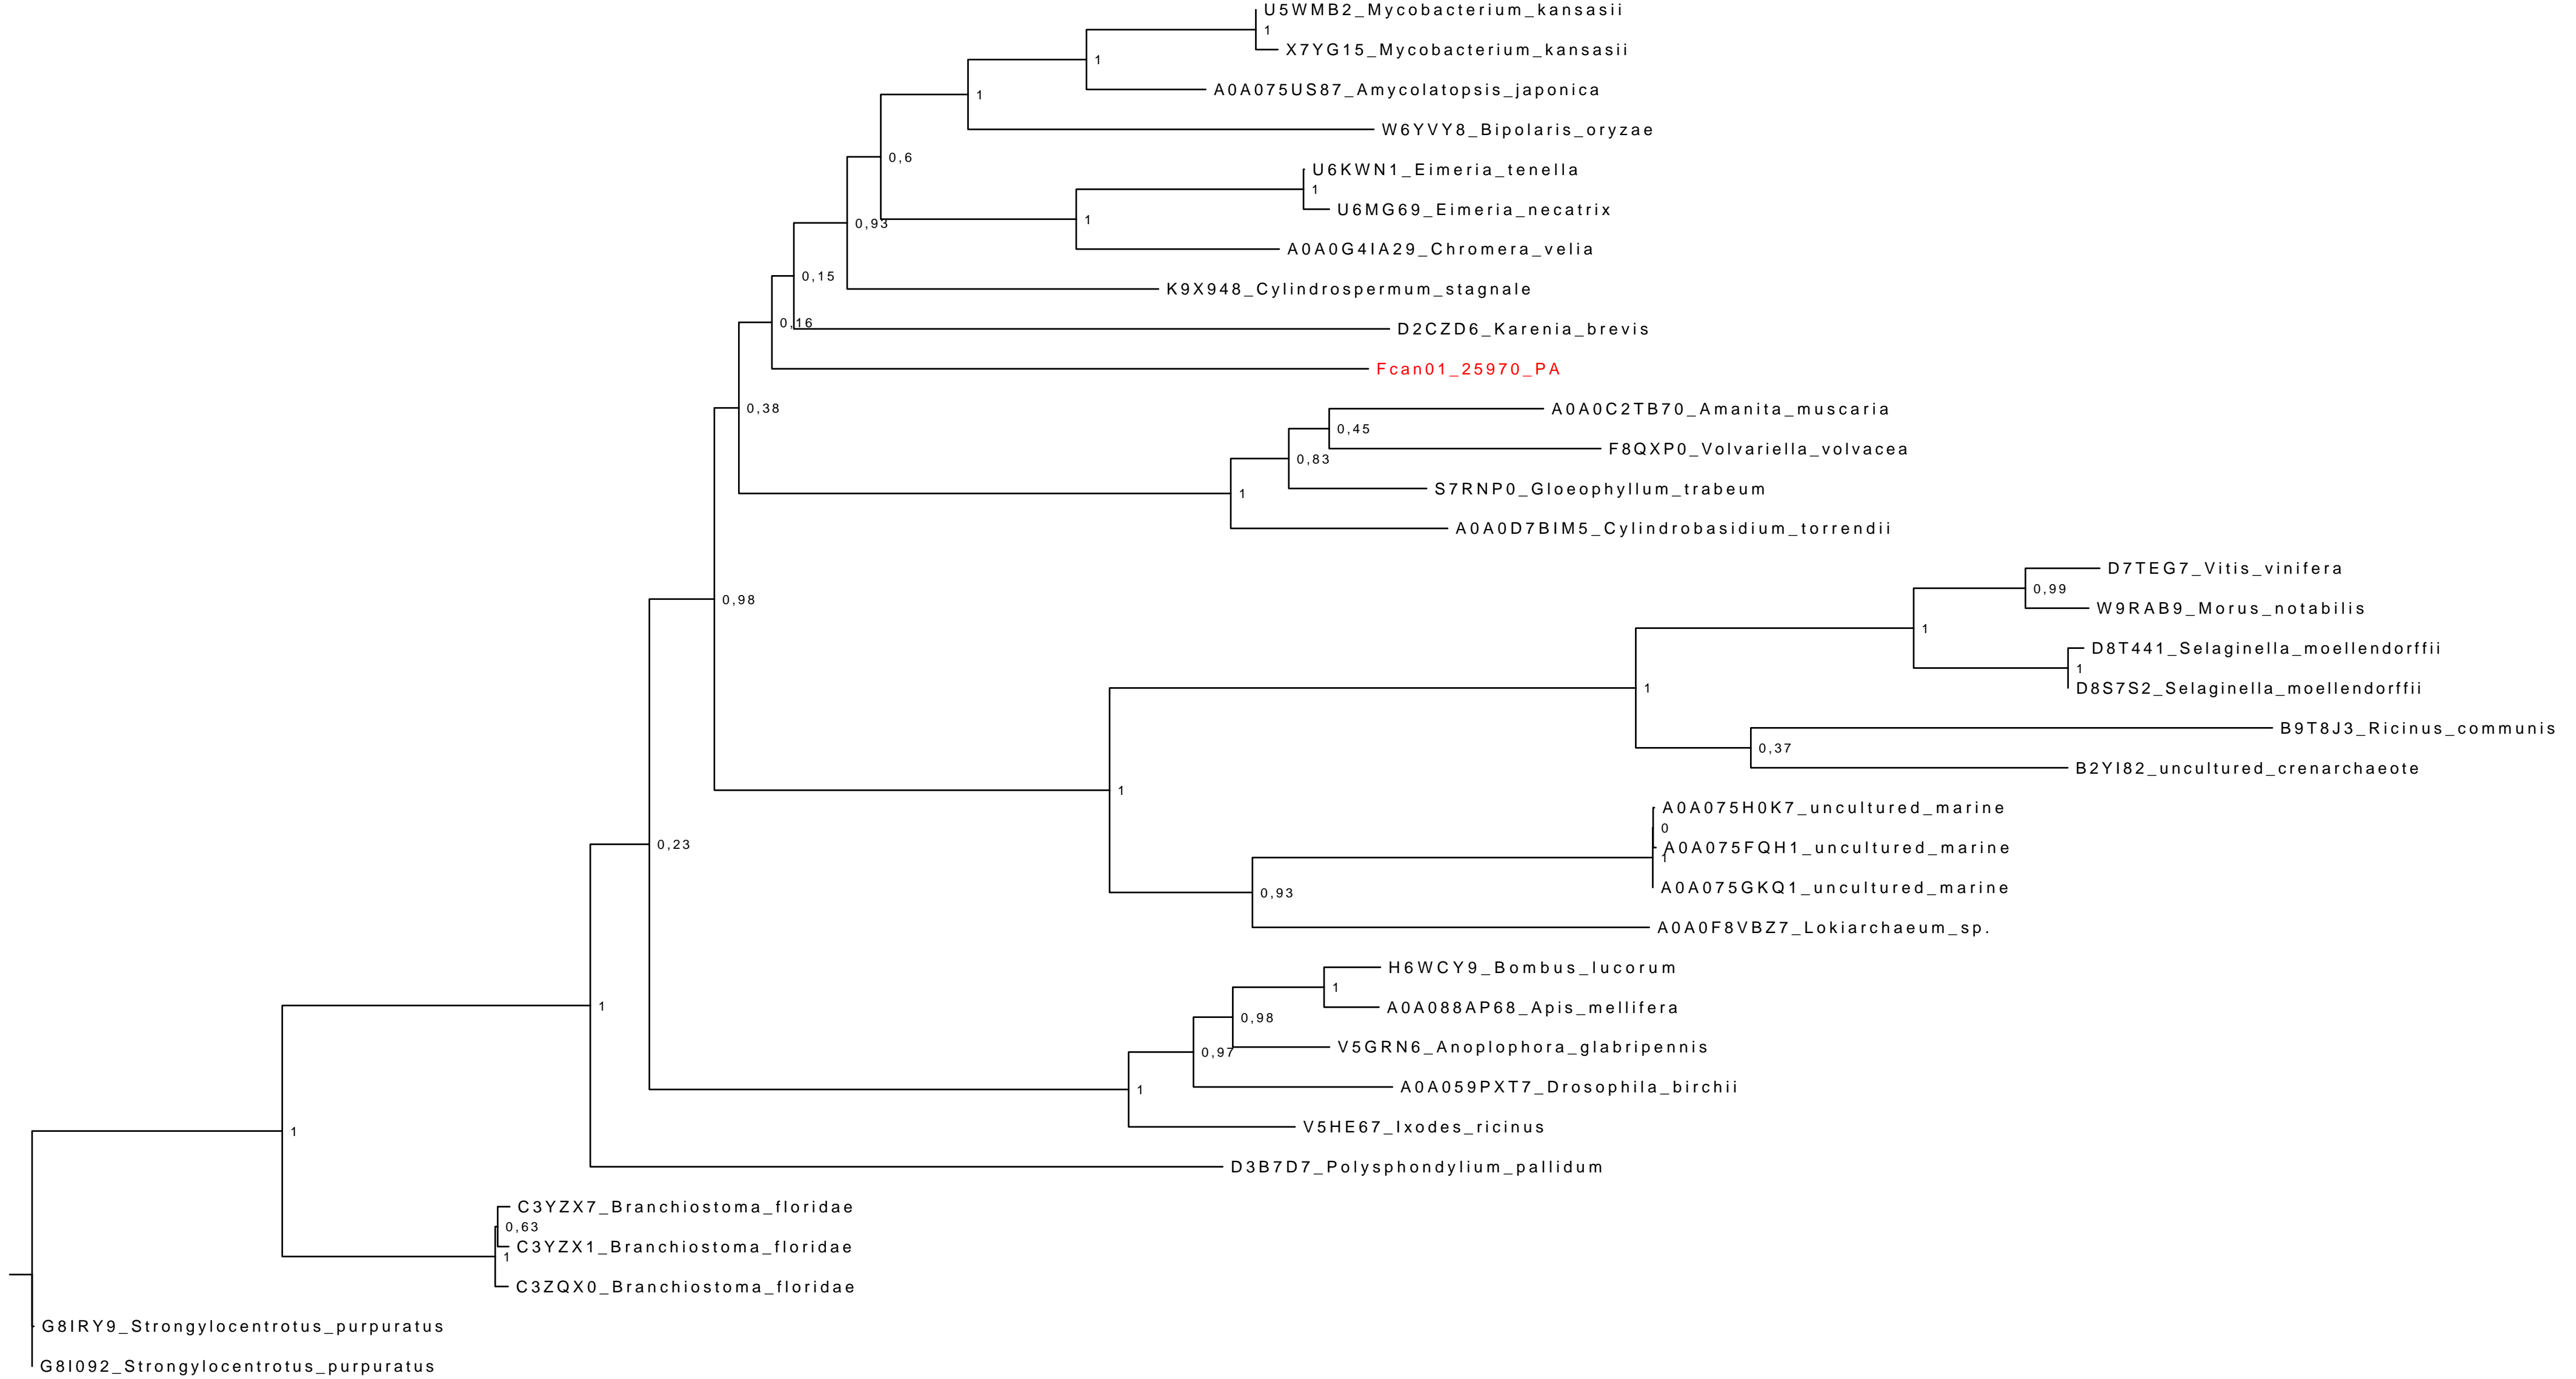

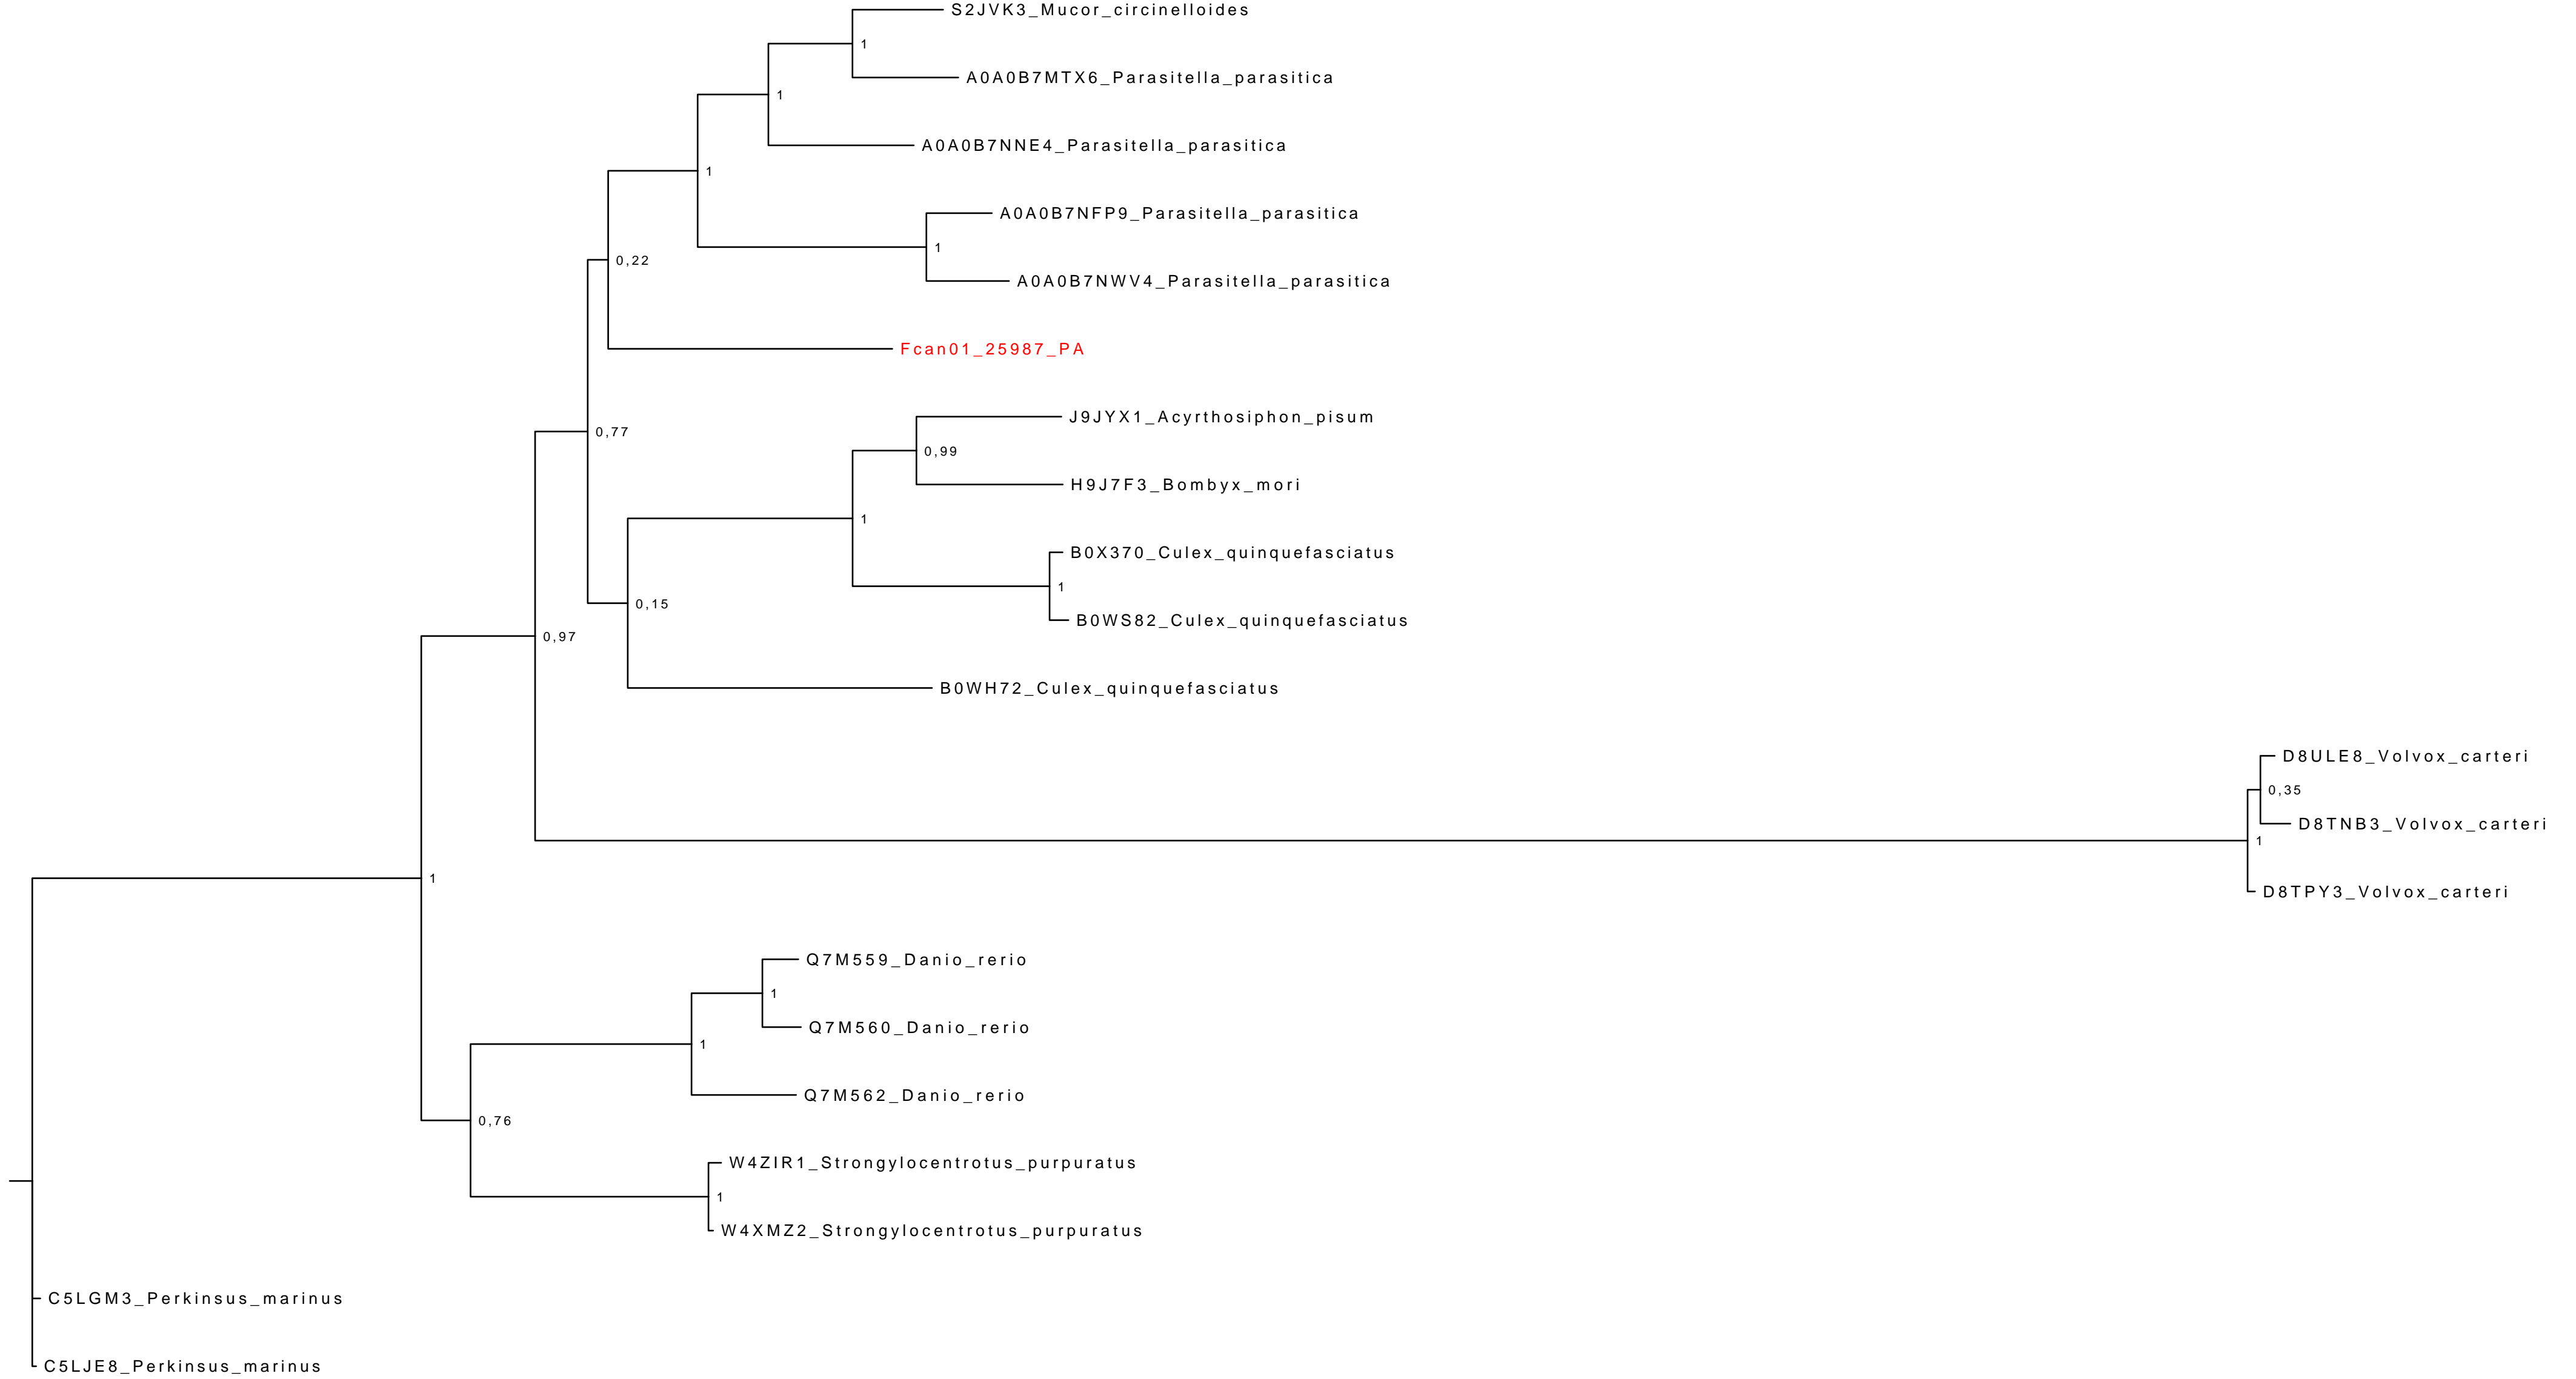

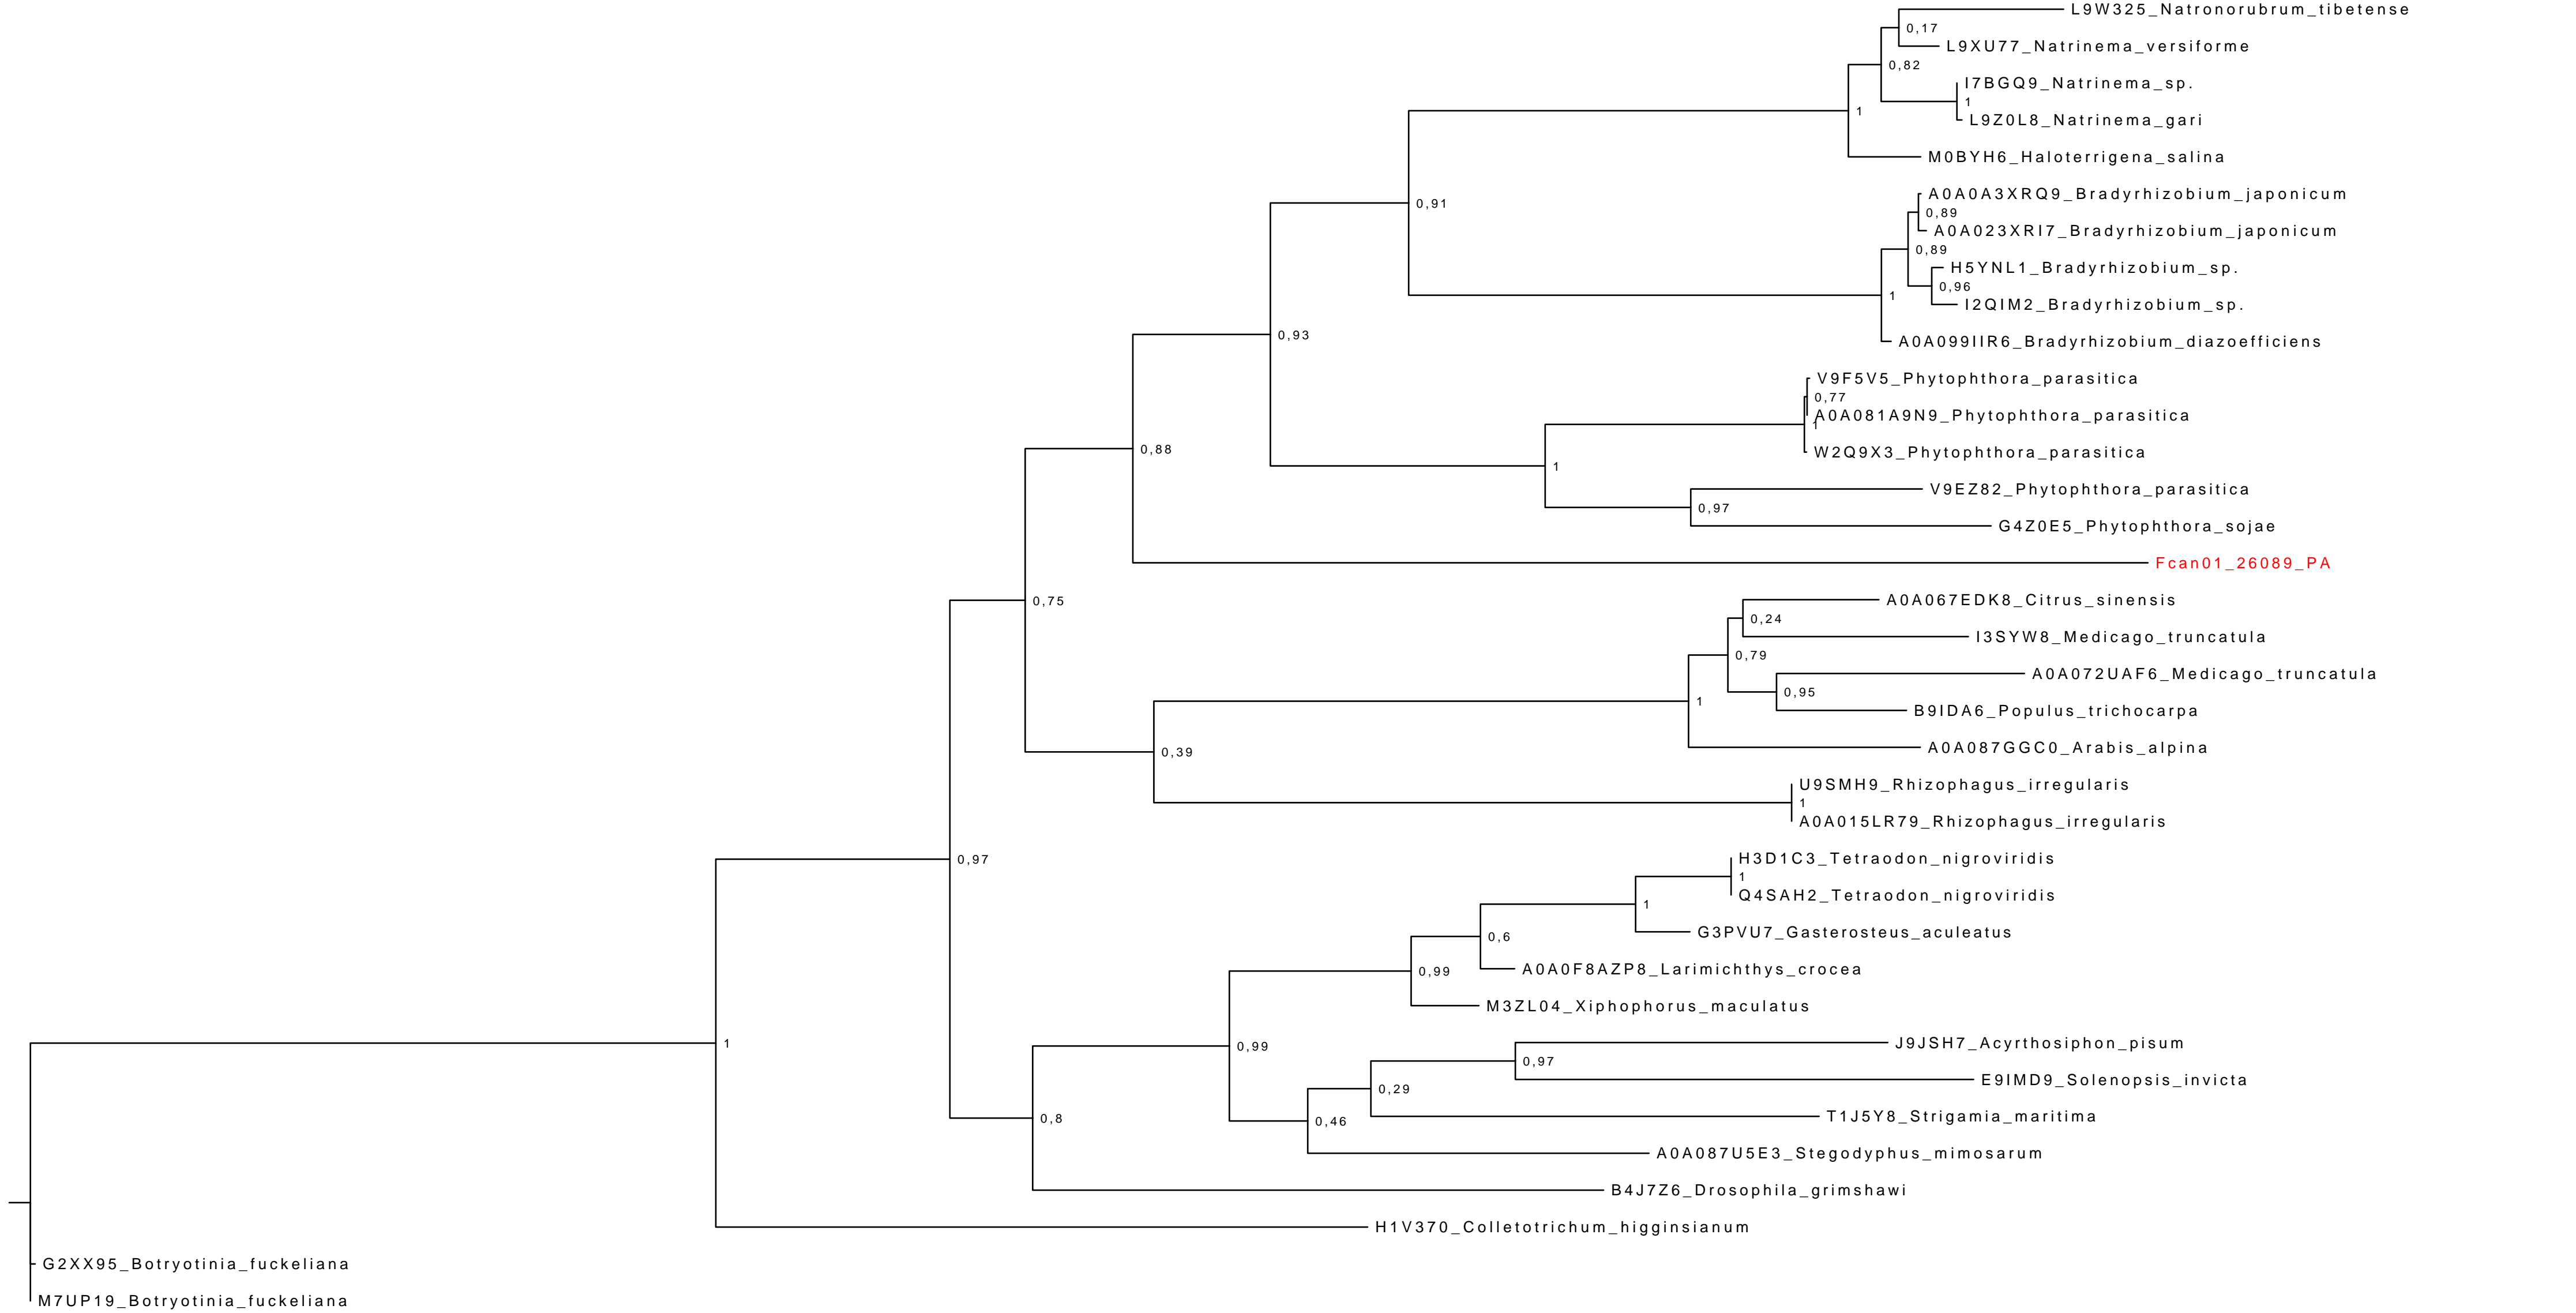

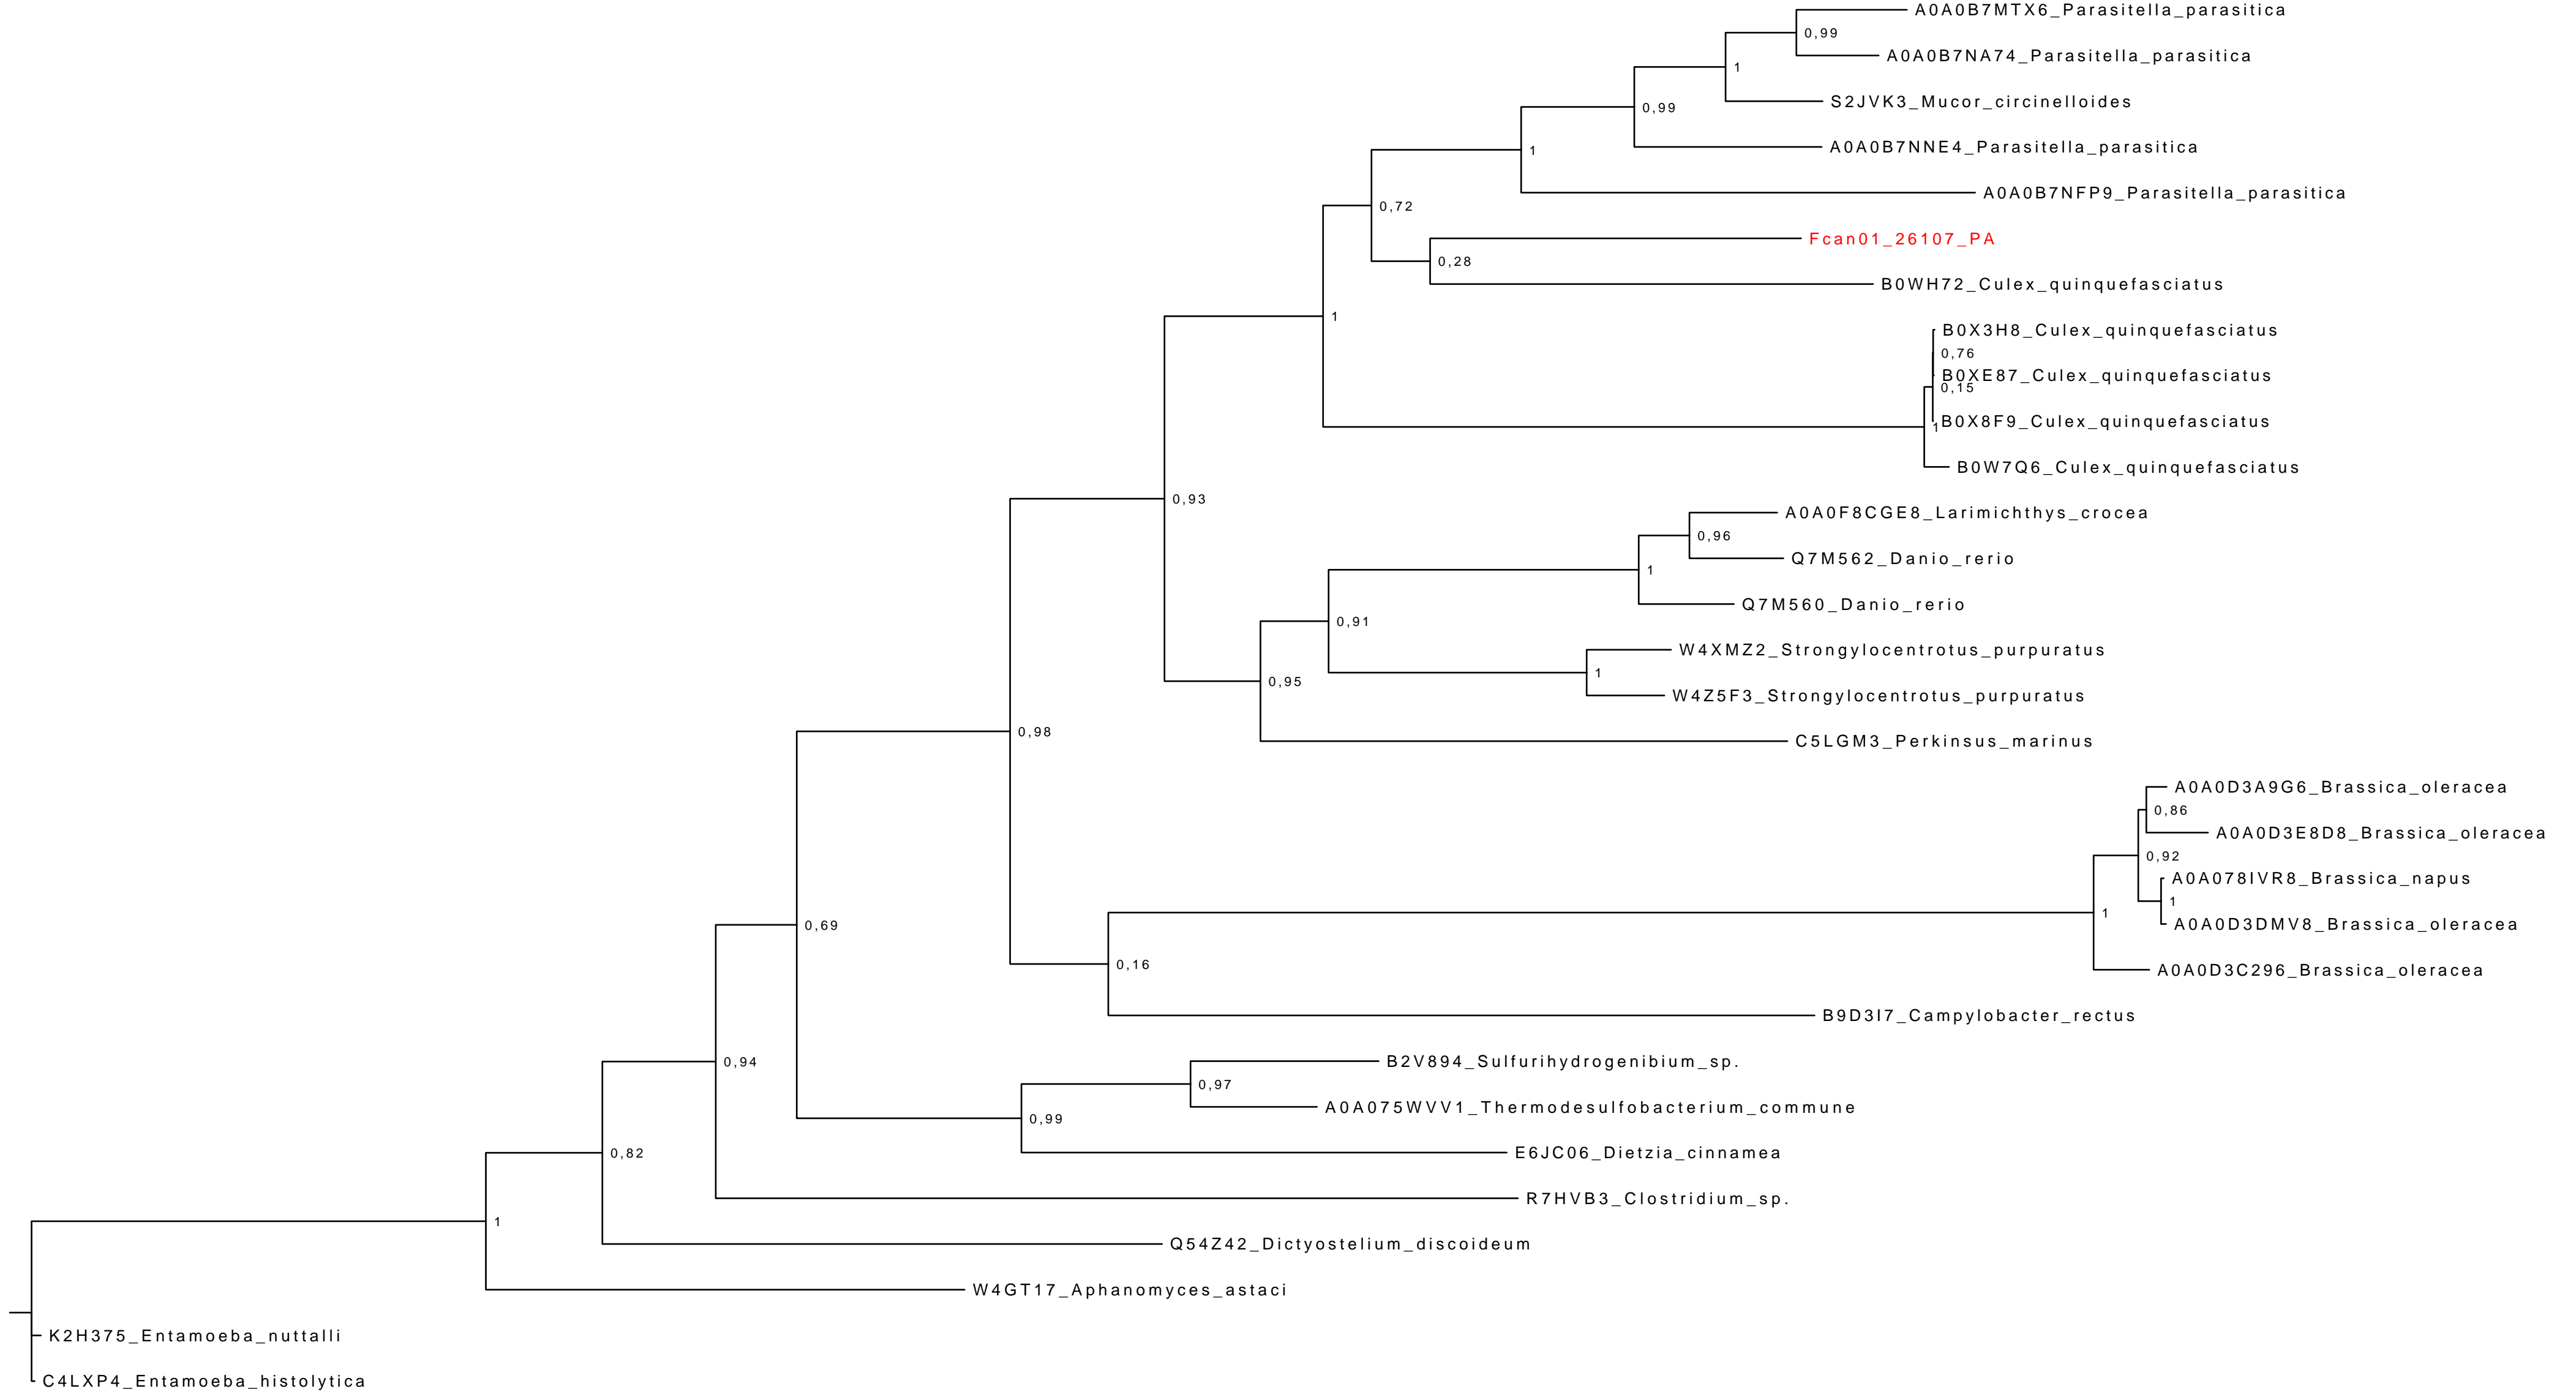



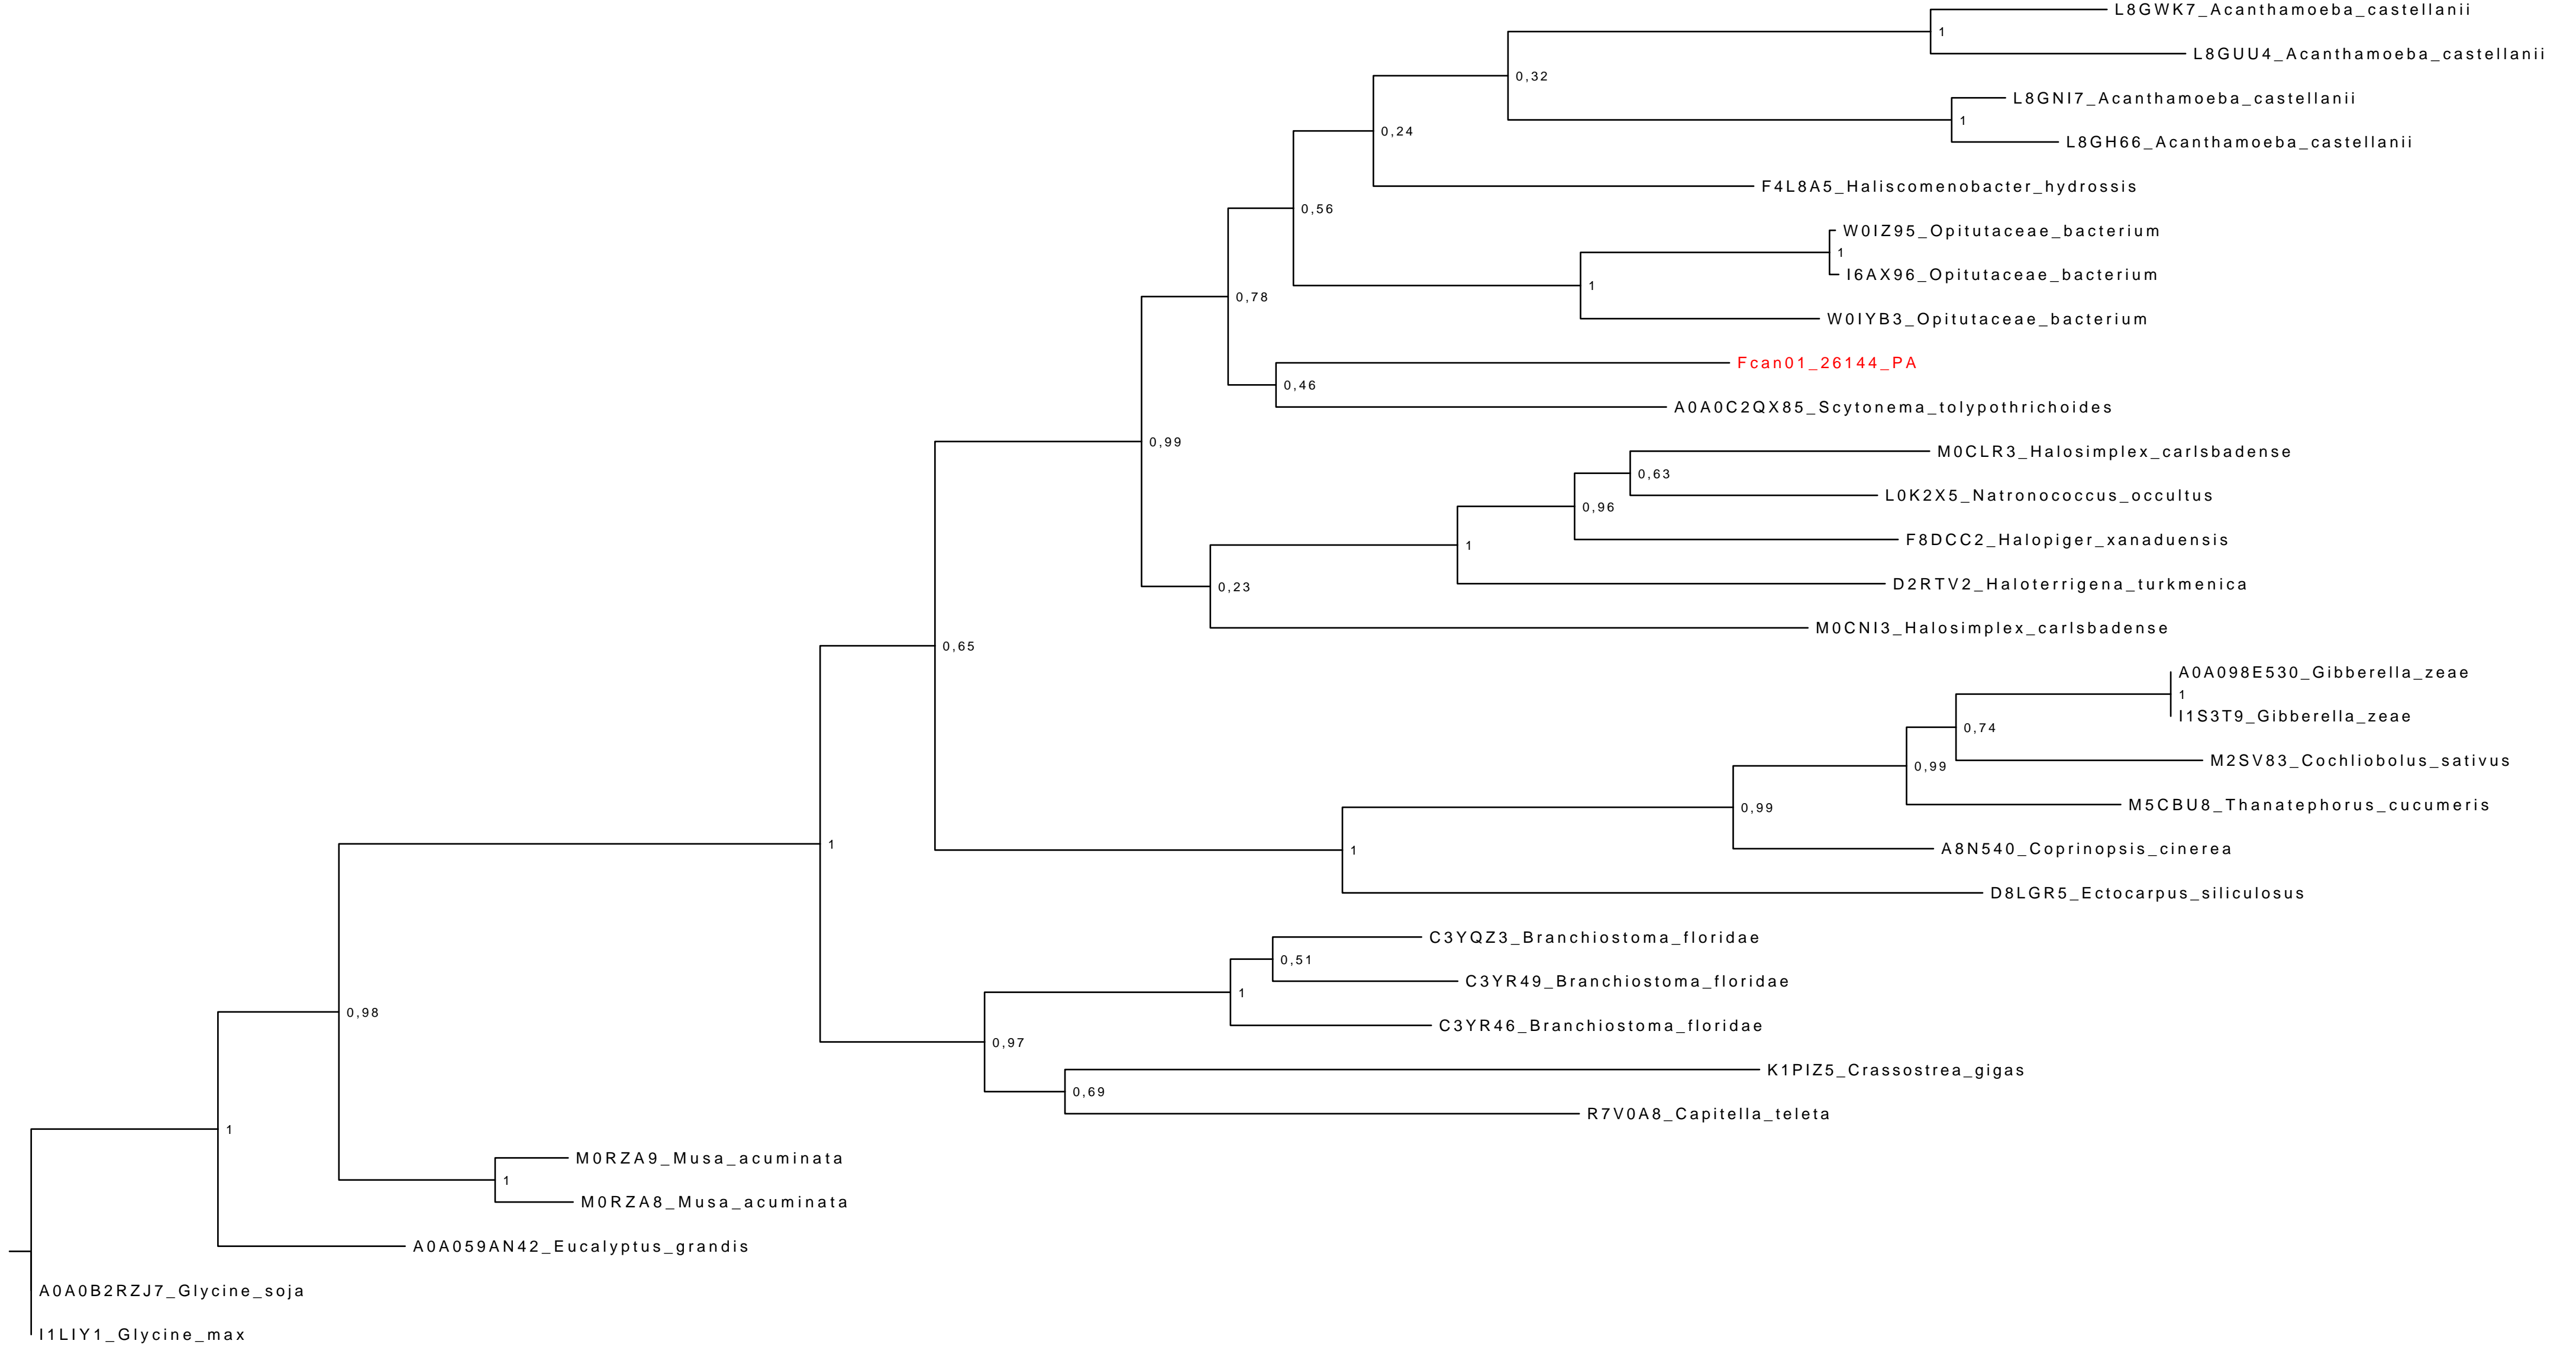

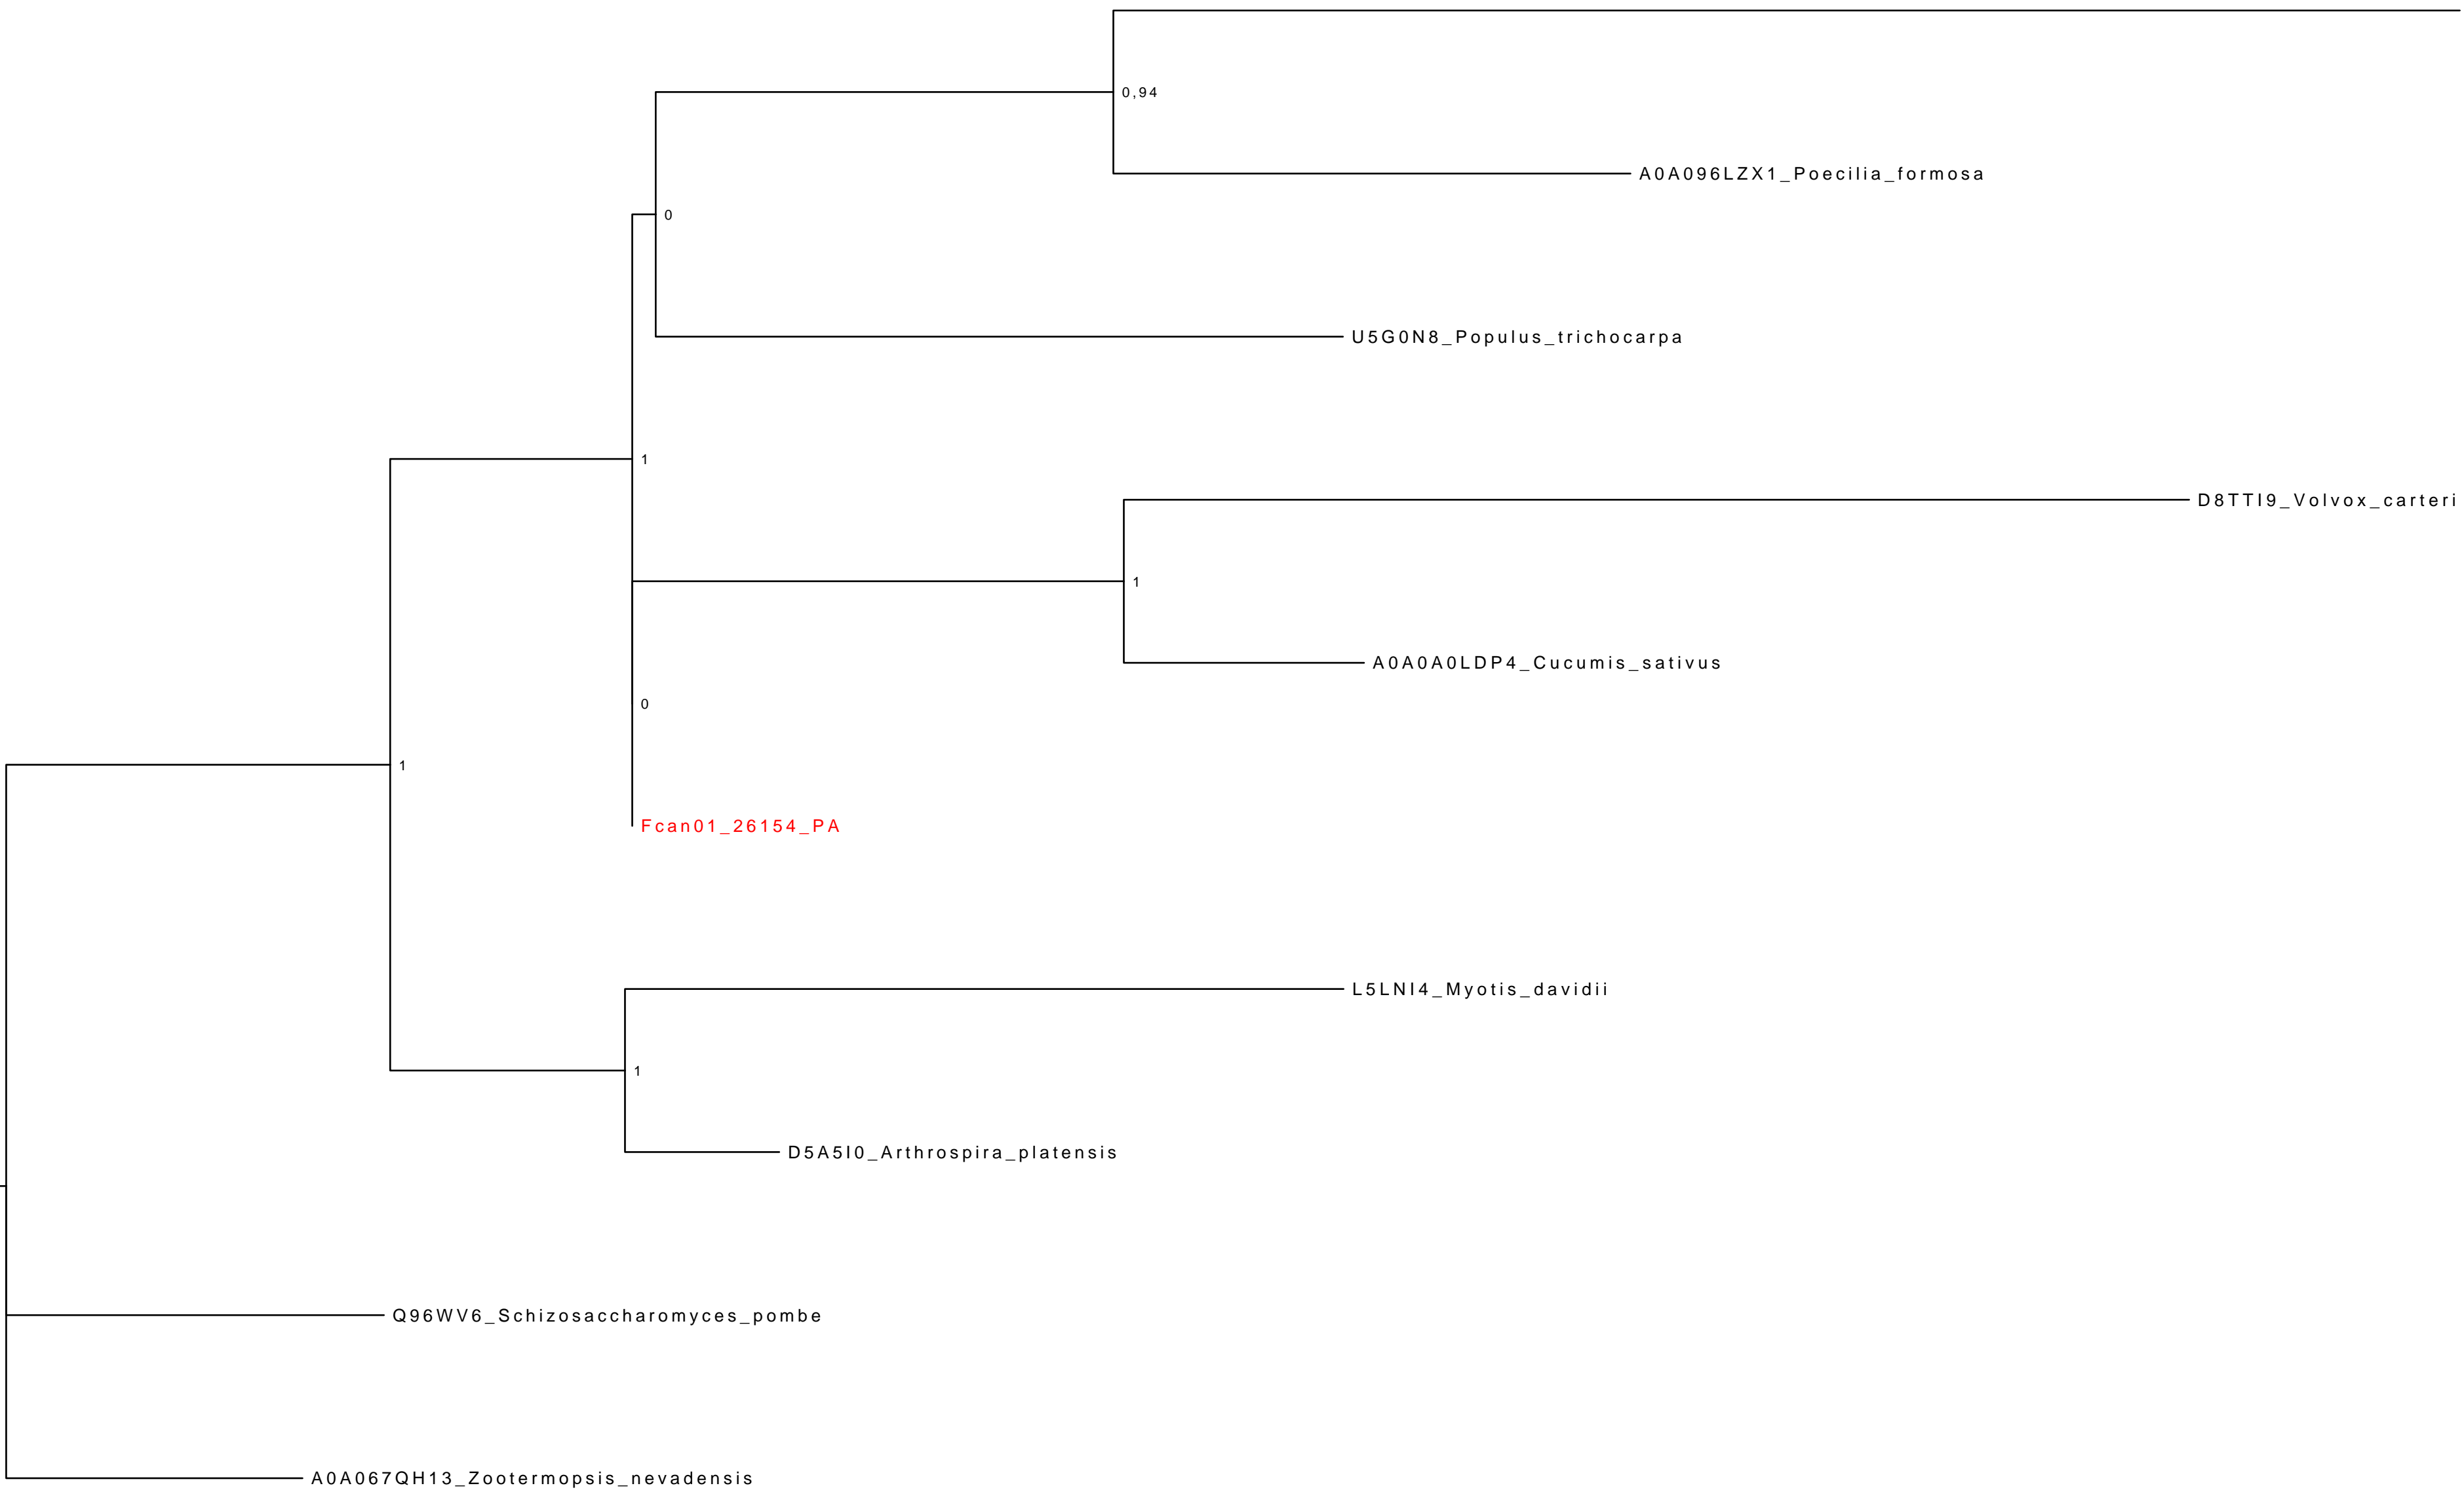

0.5

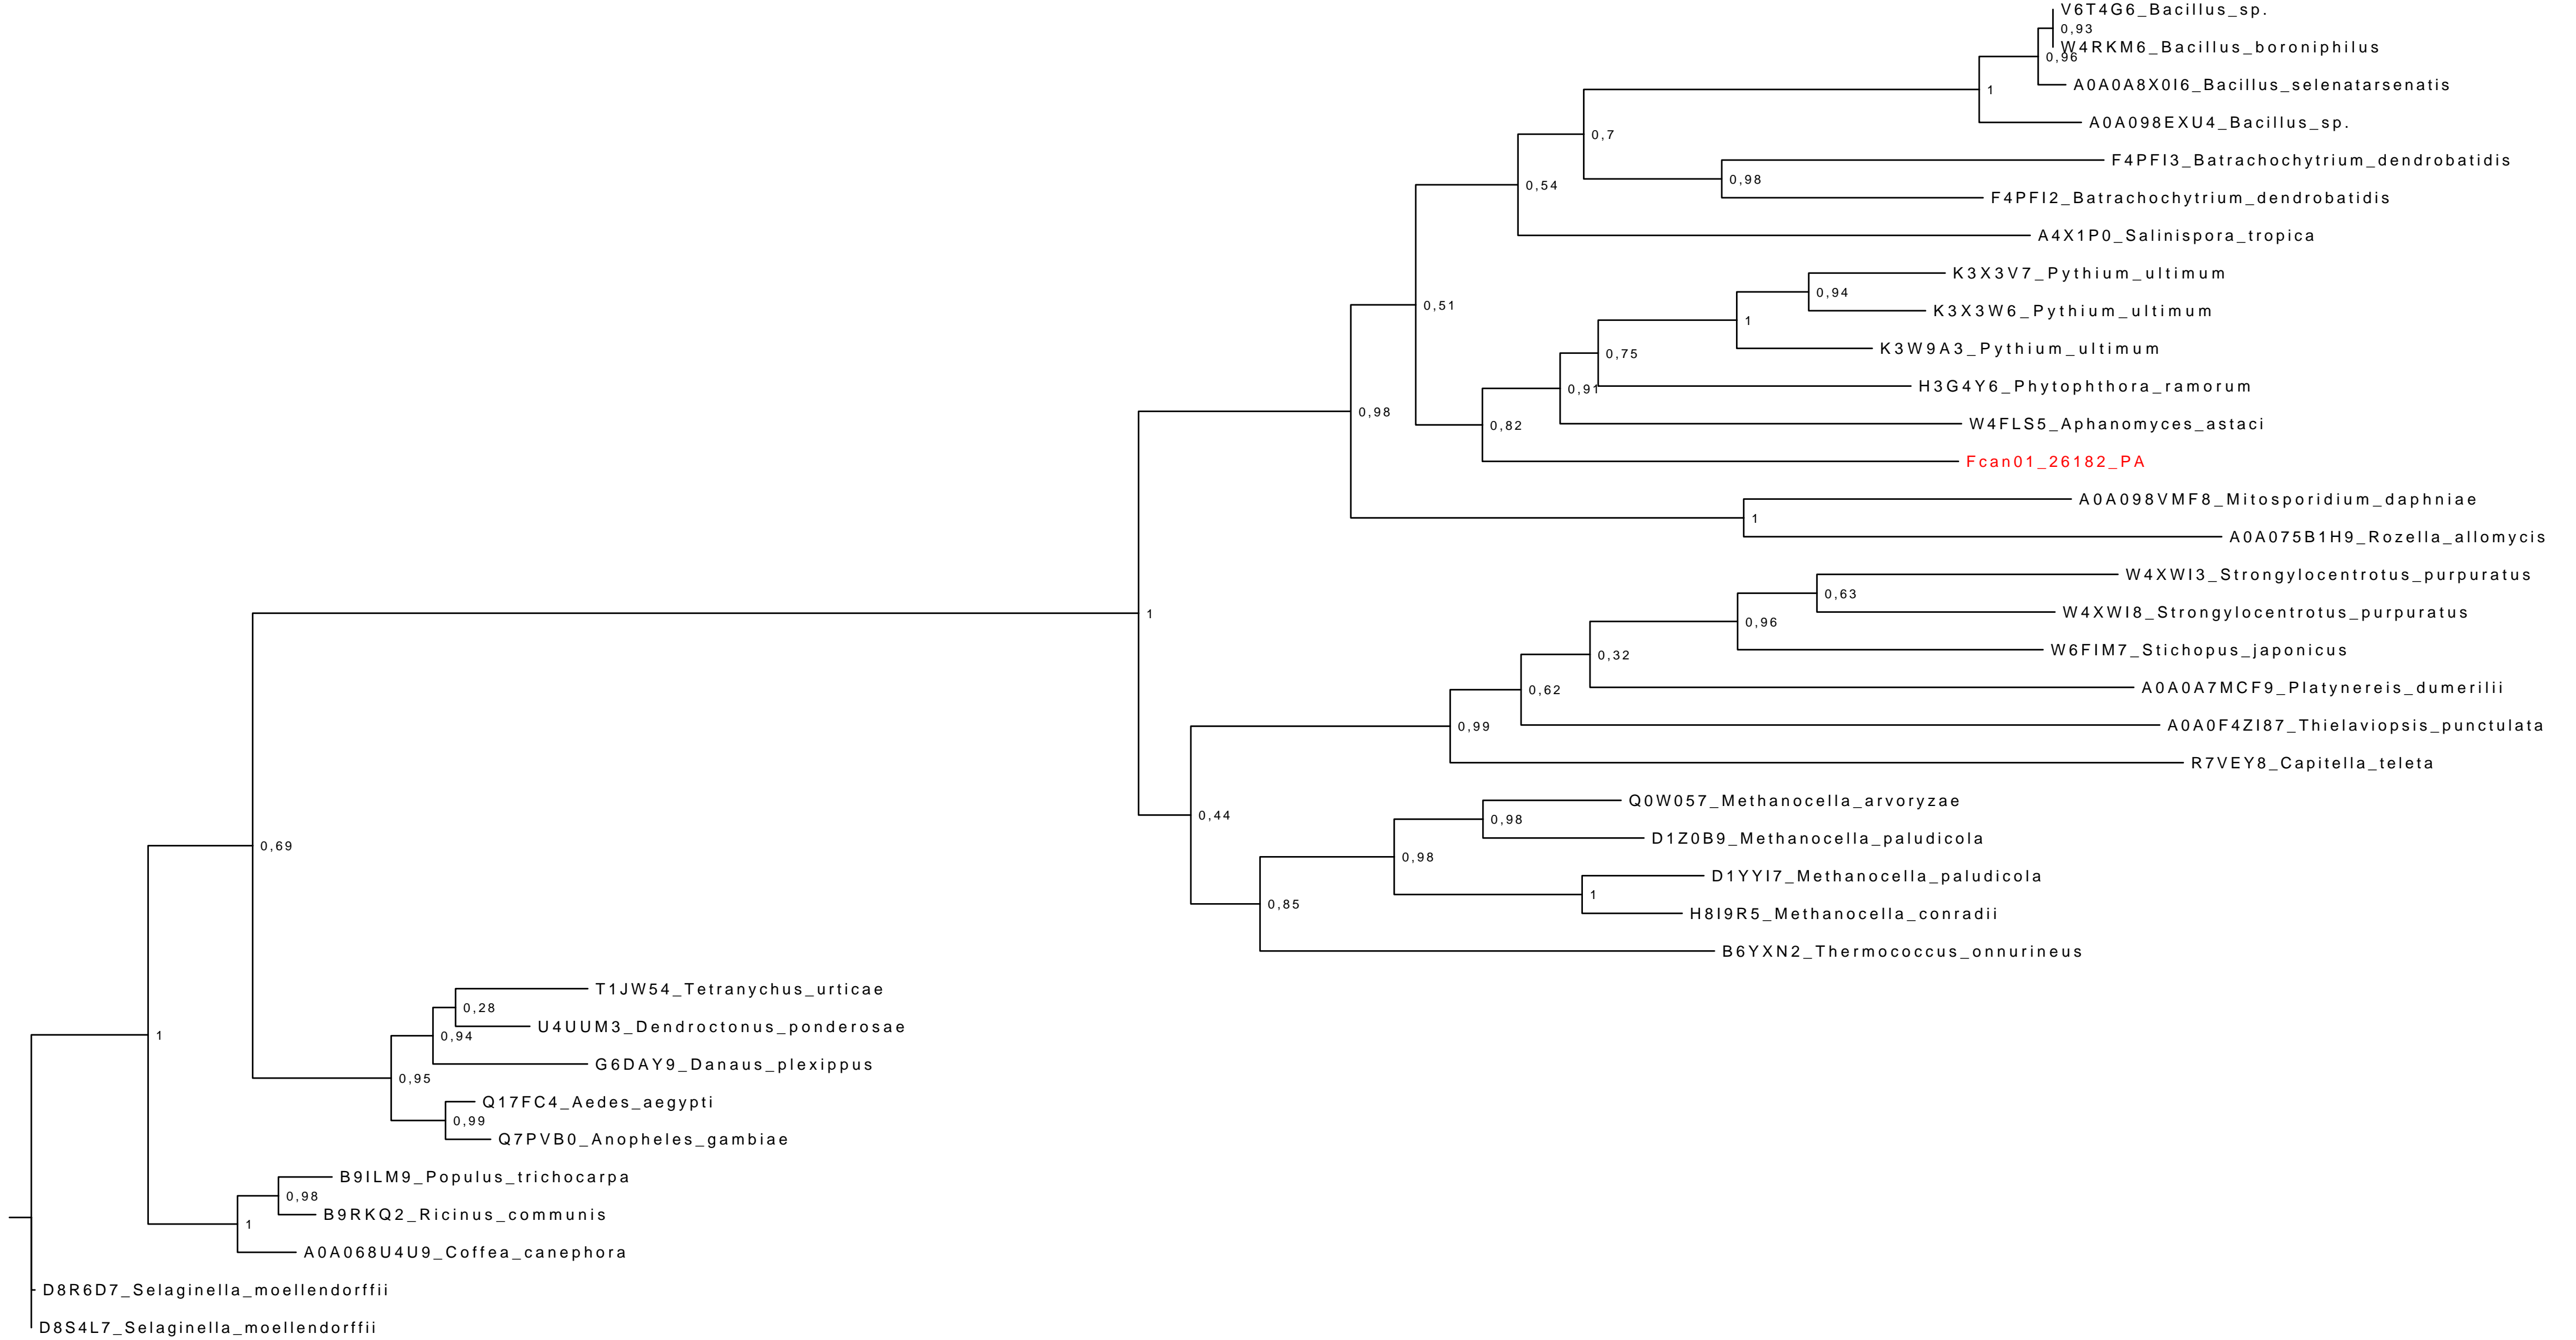

0.5

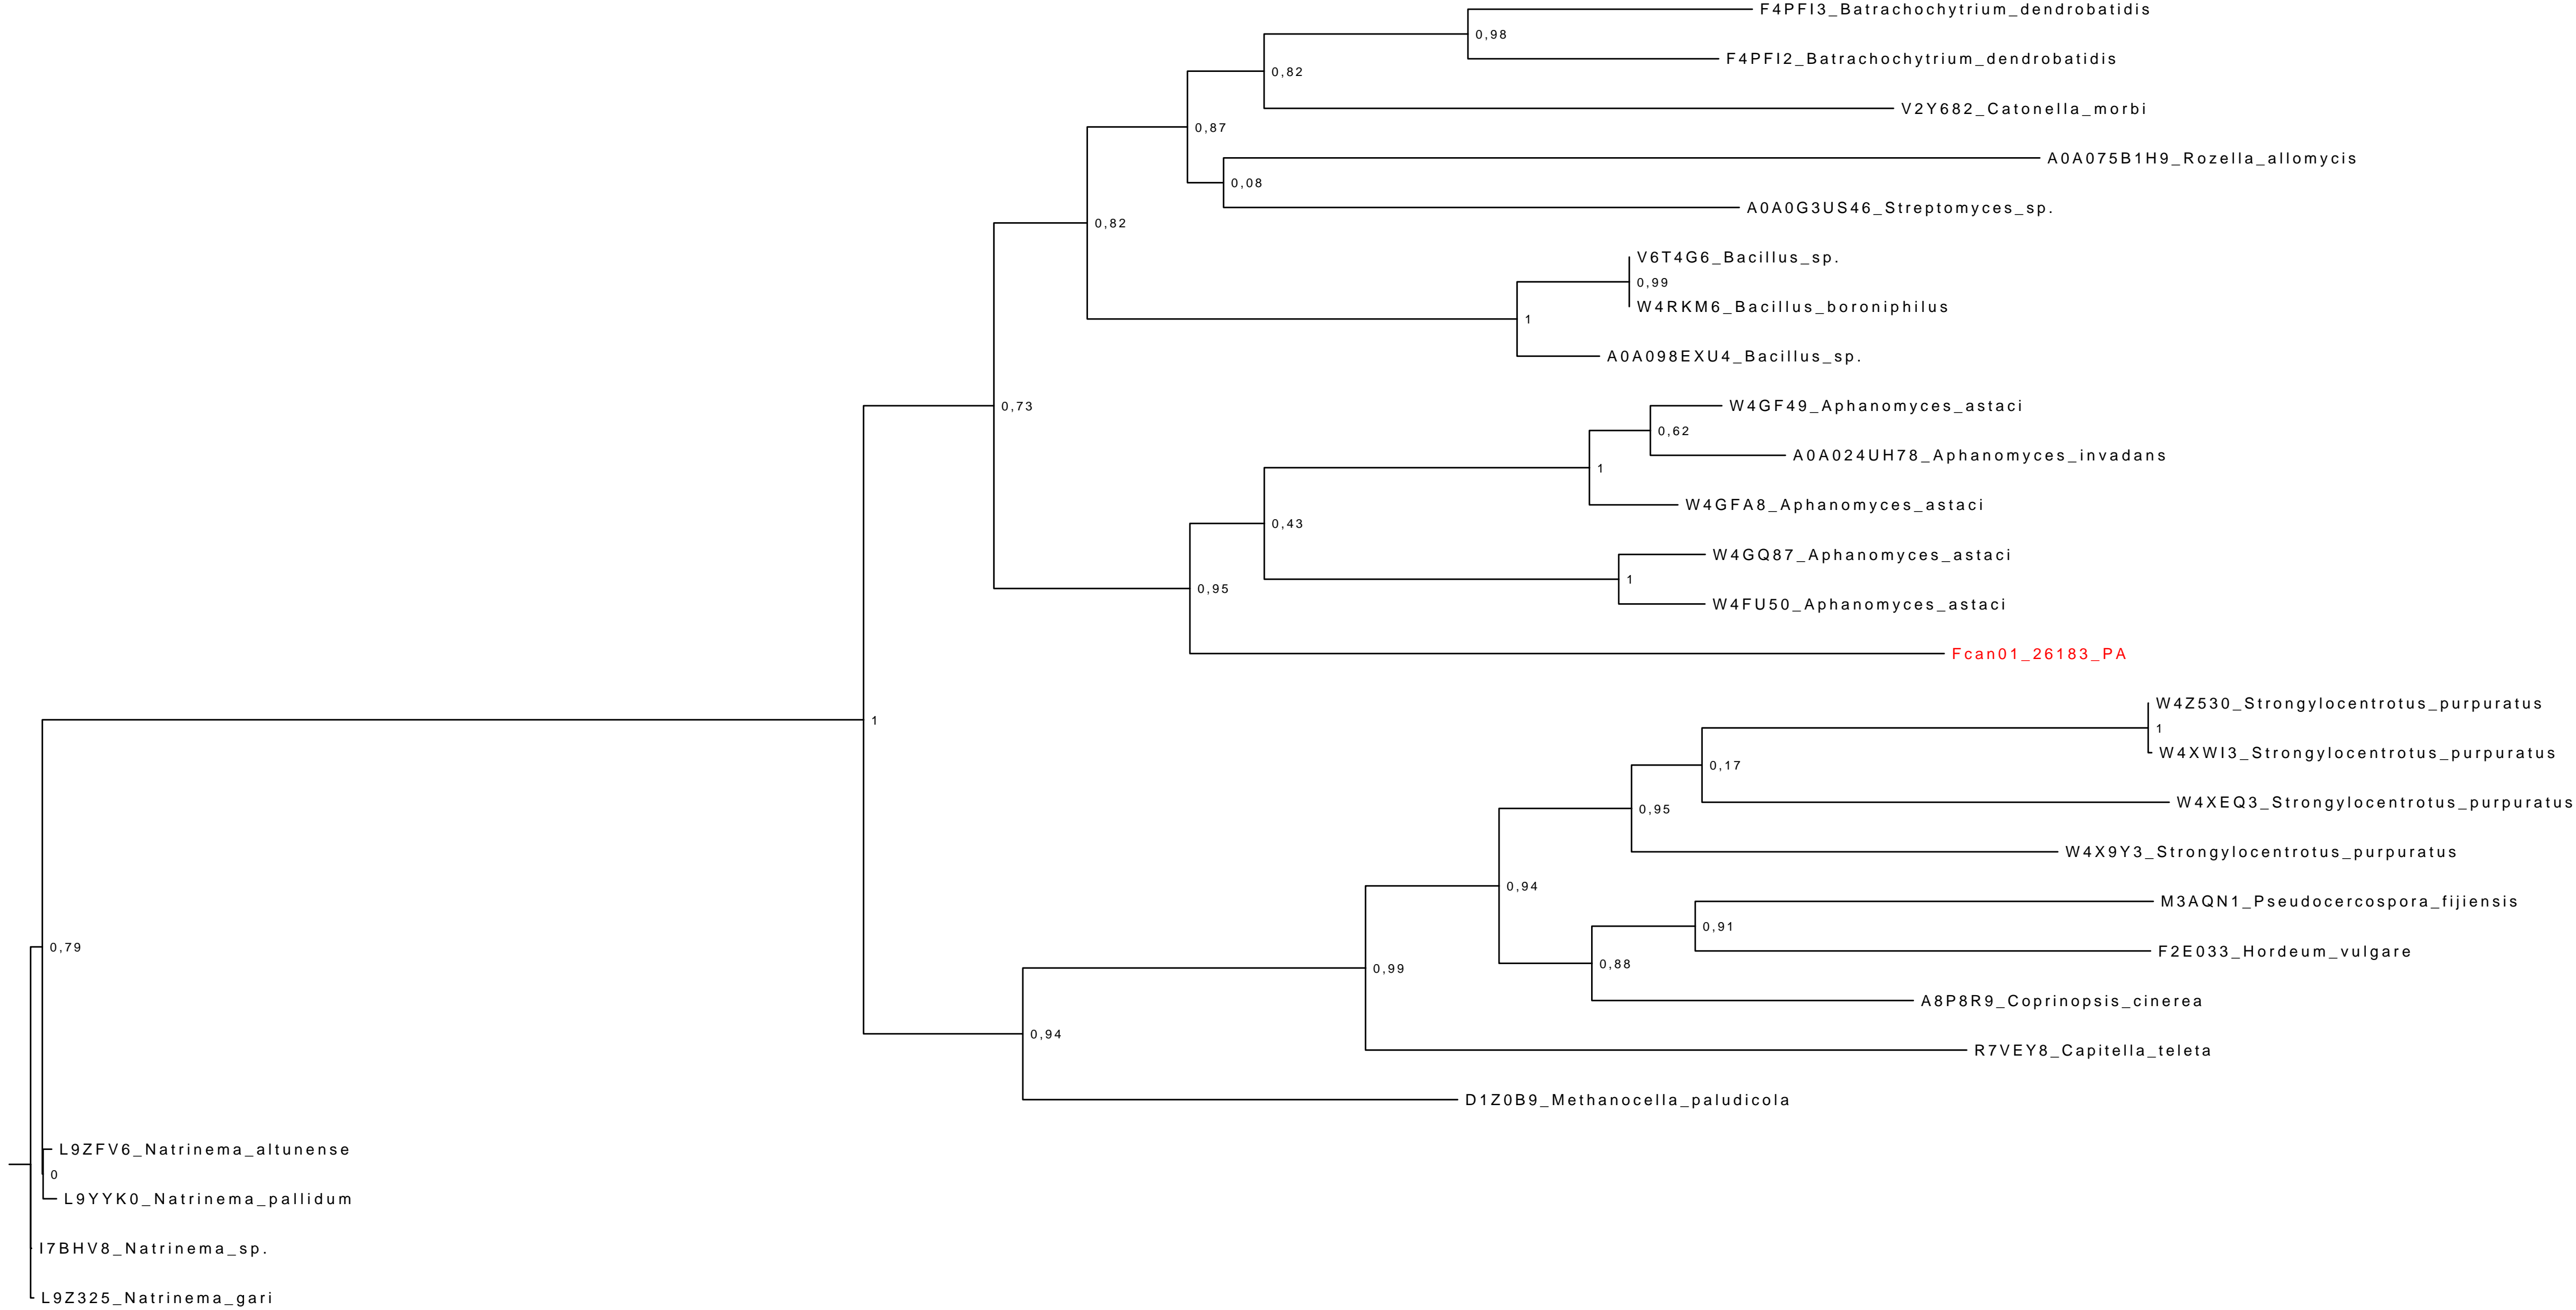

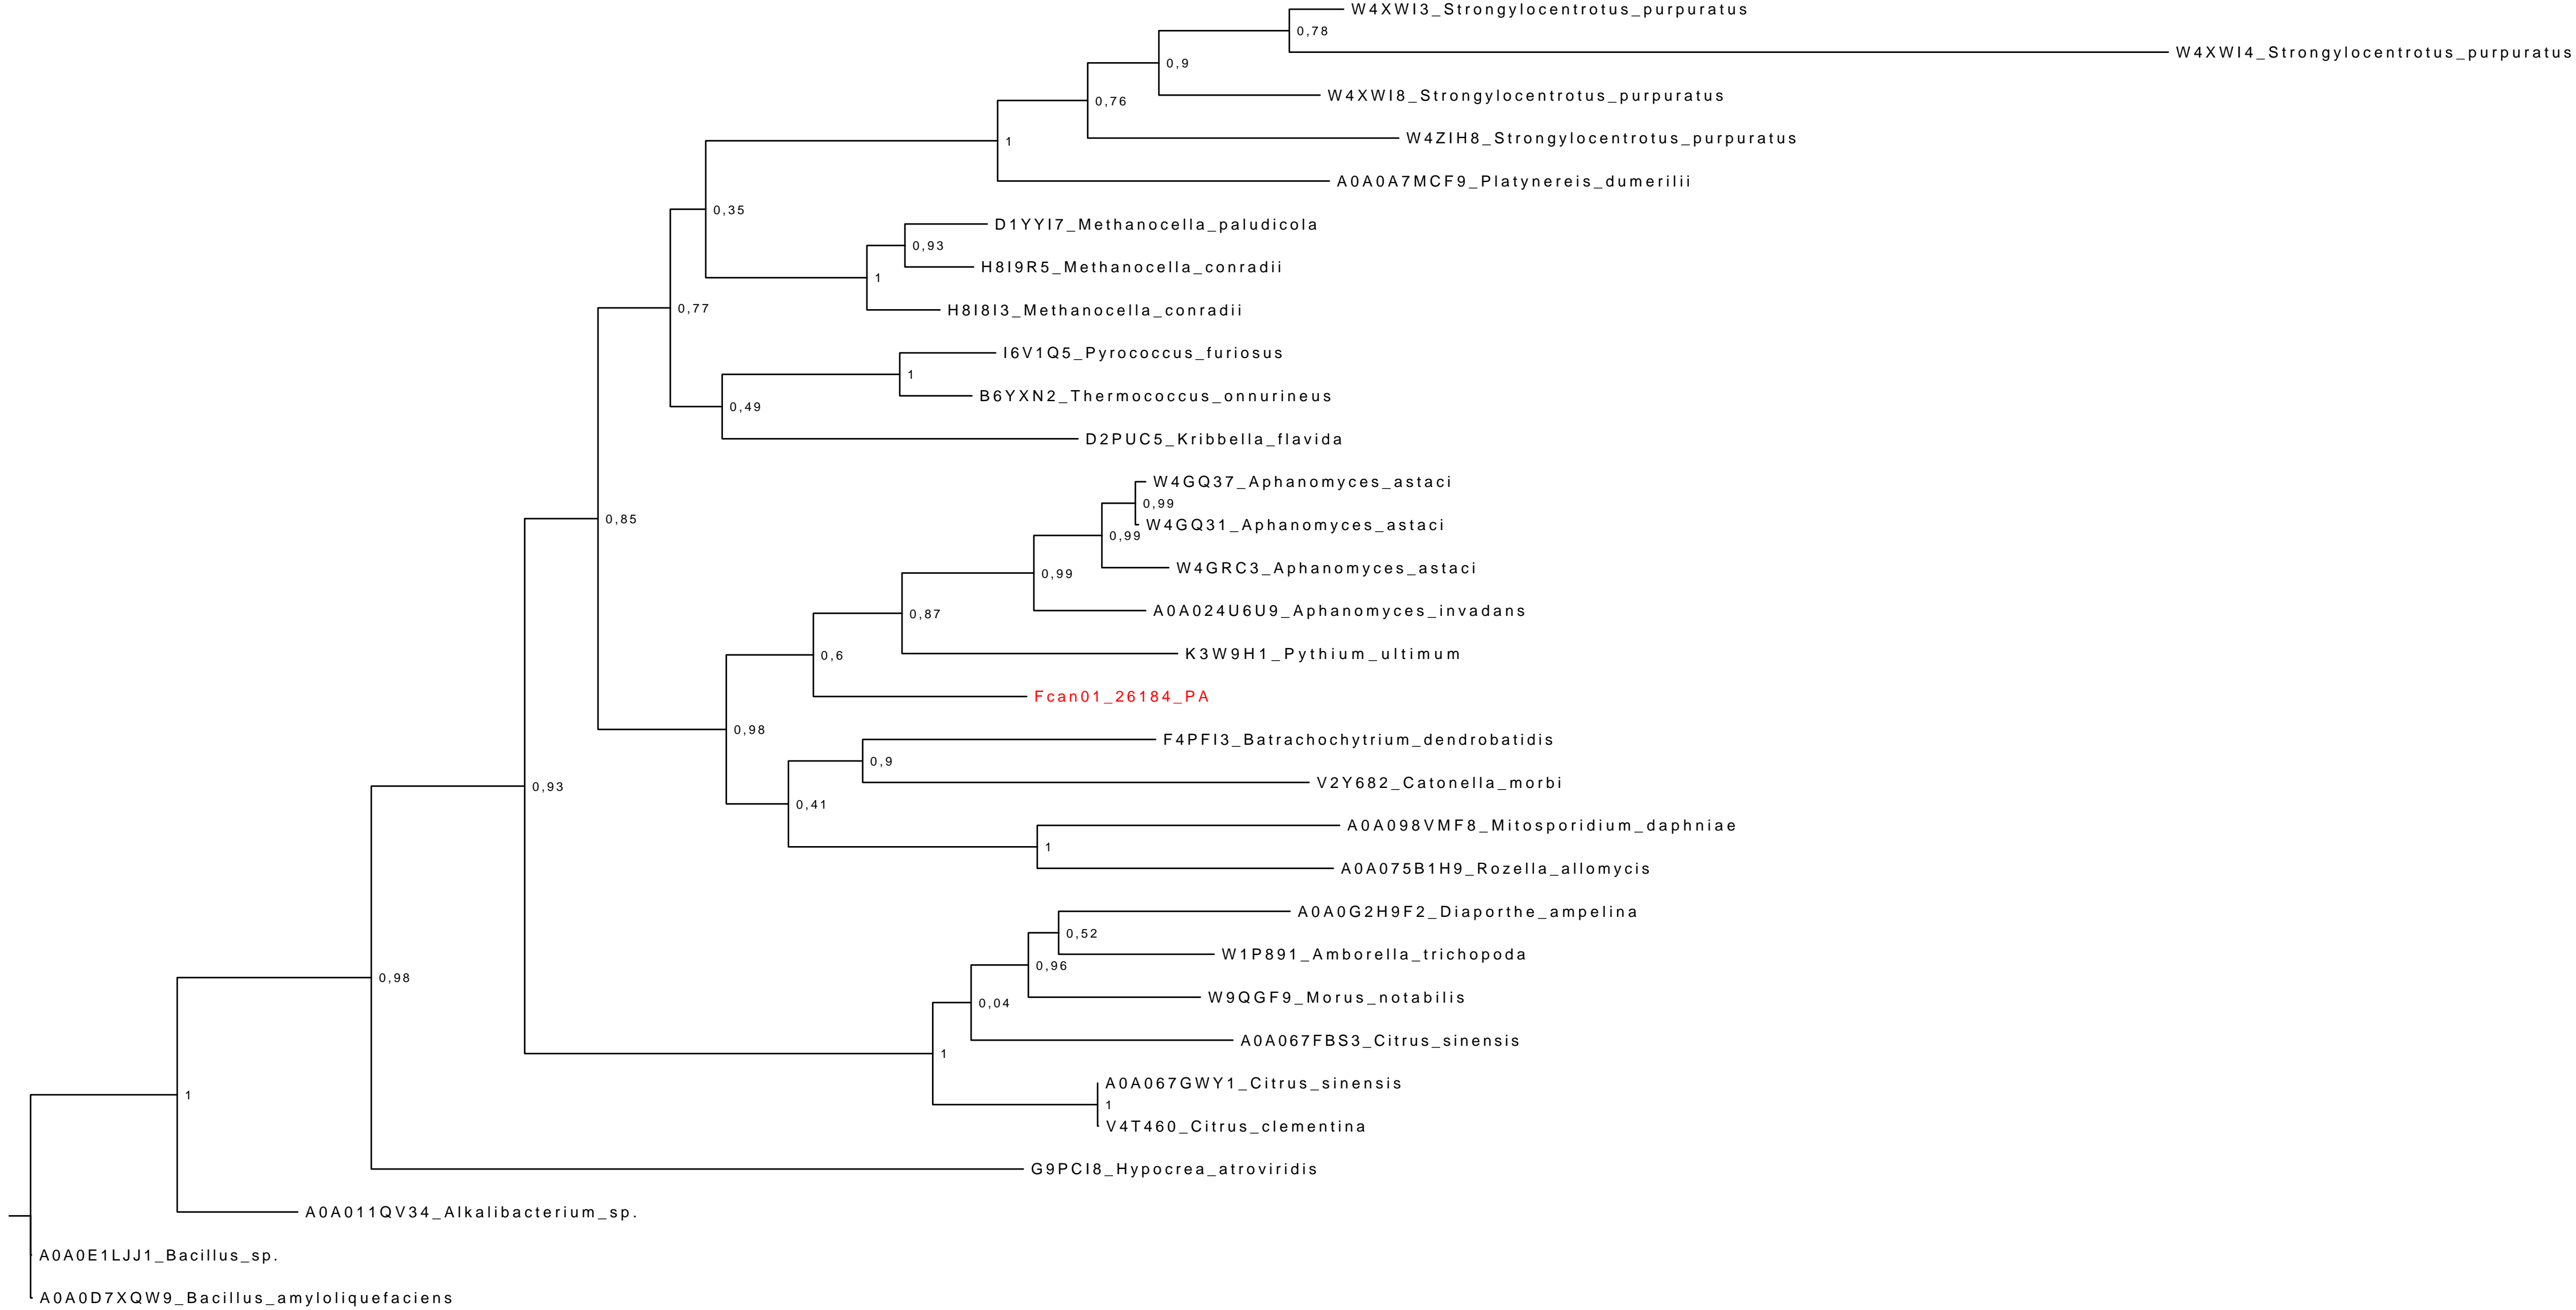

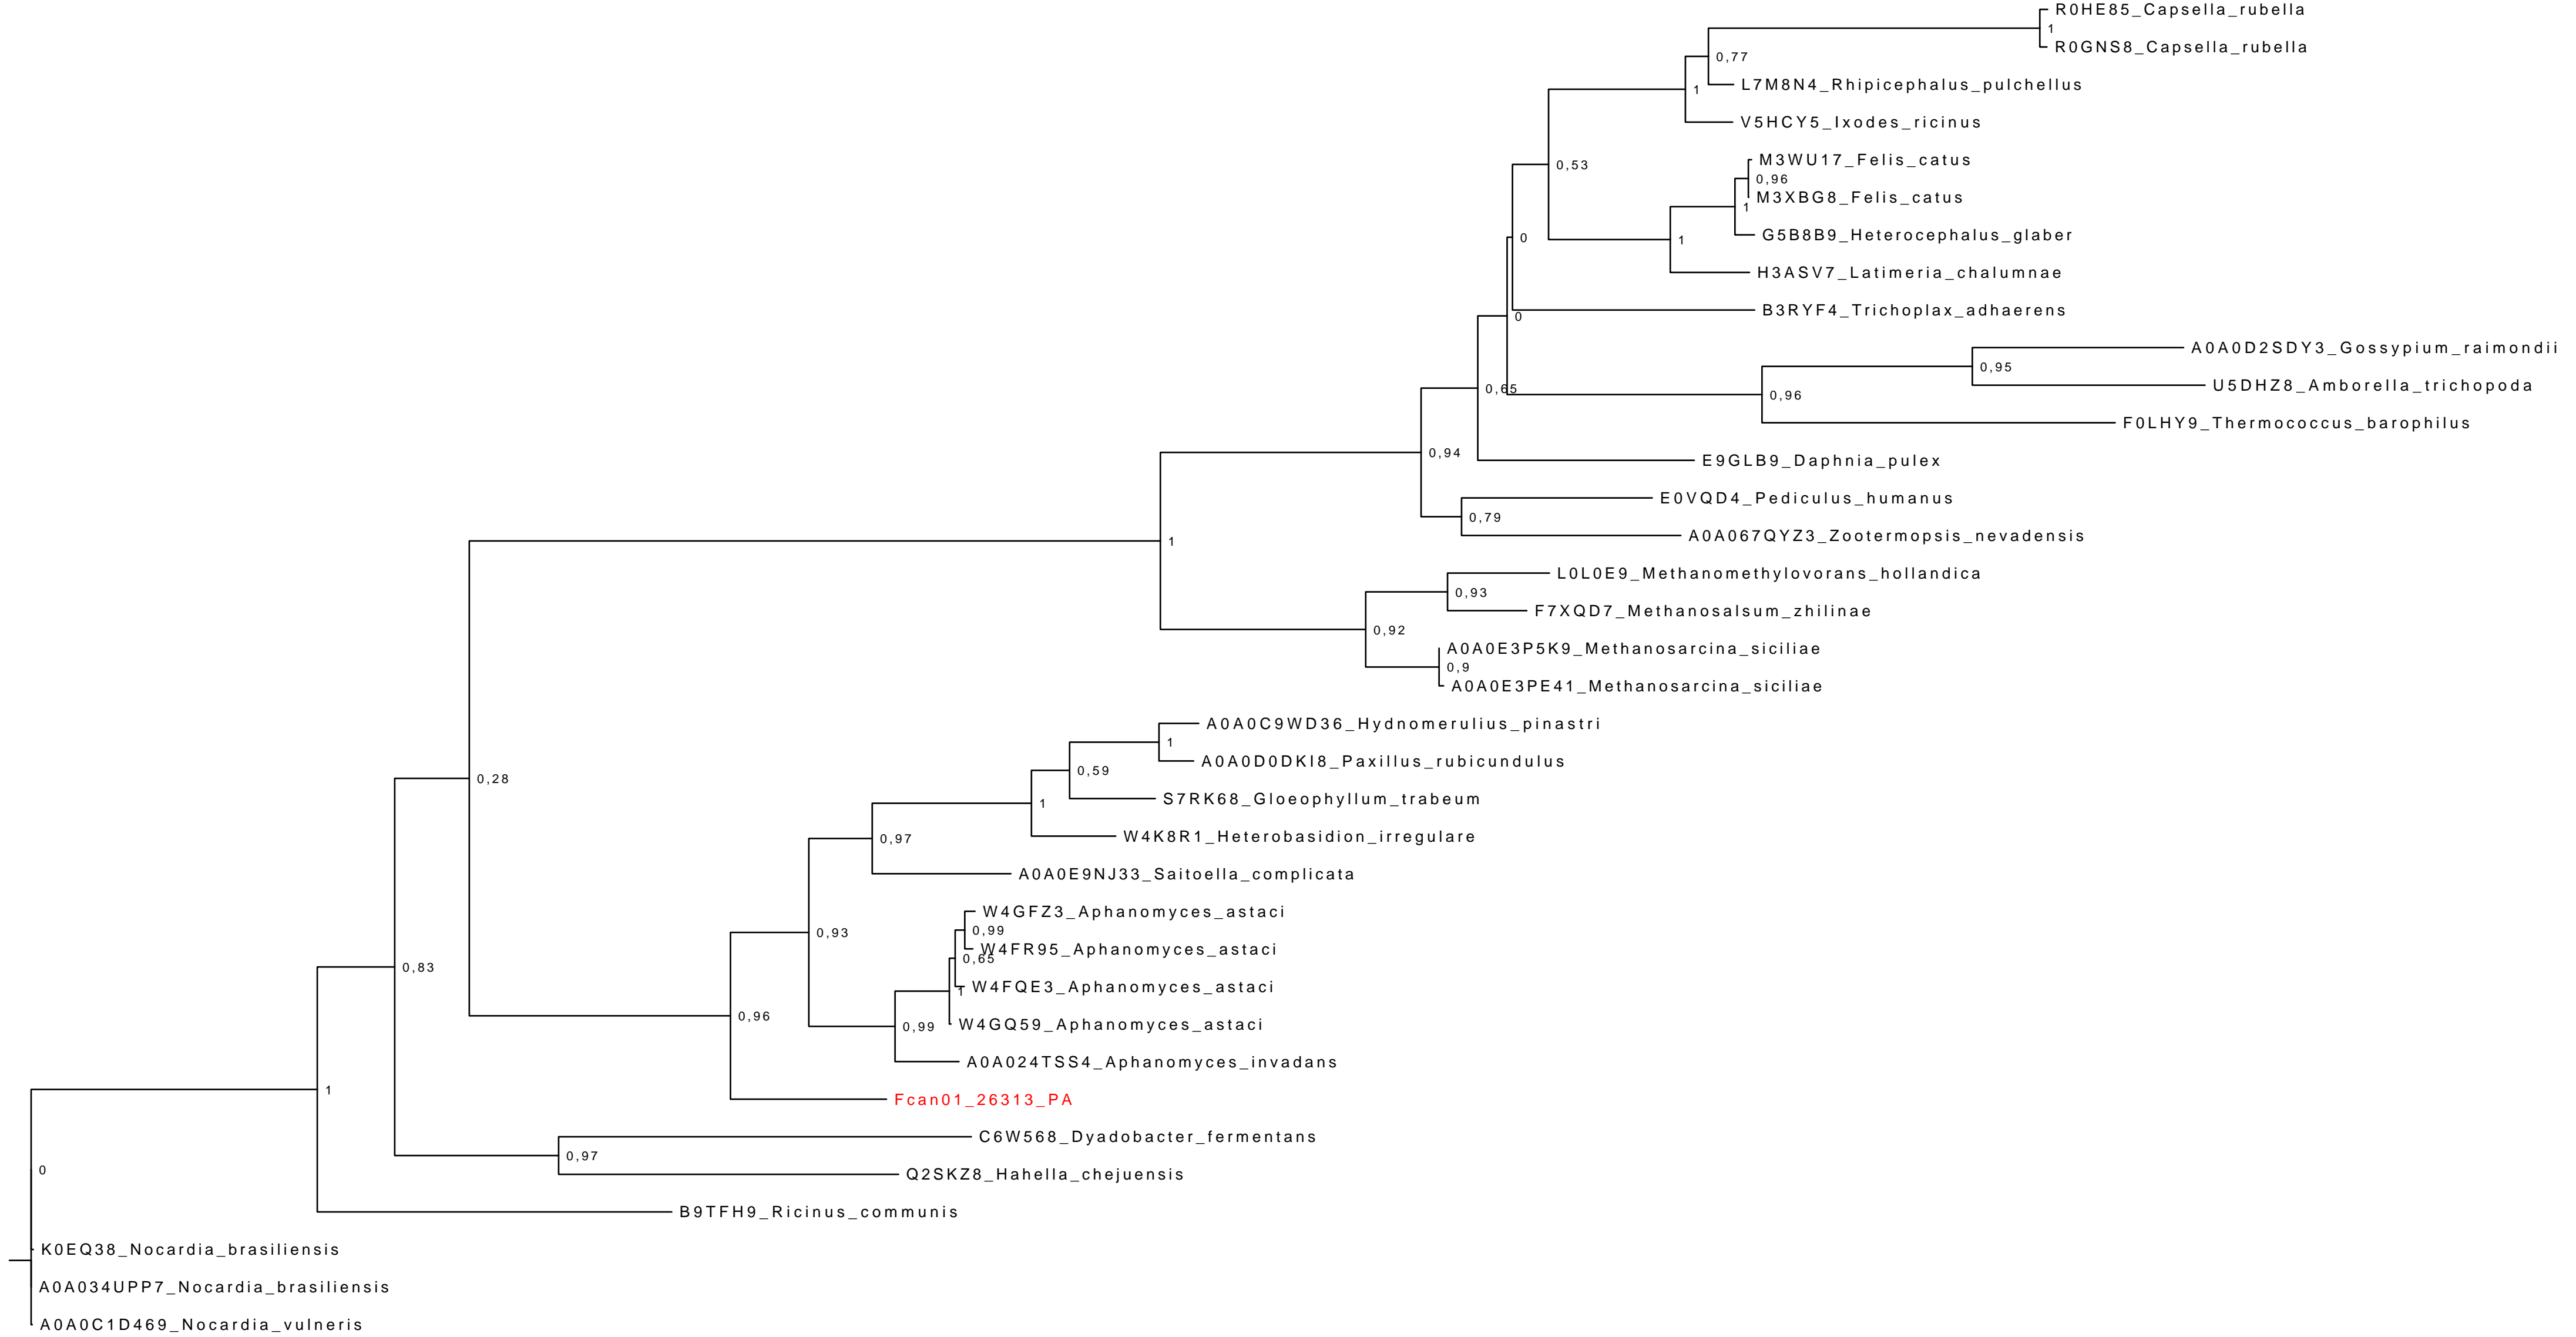

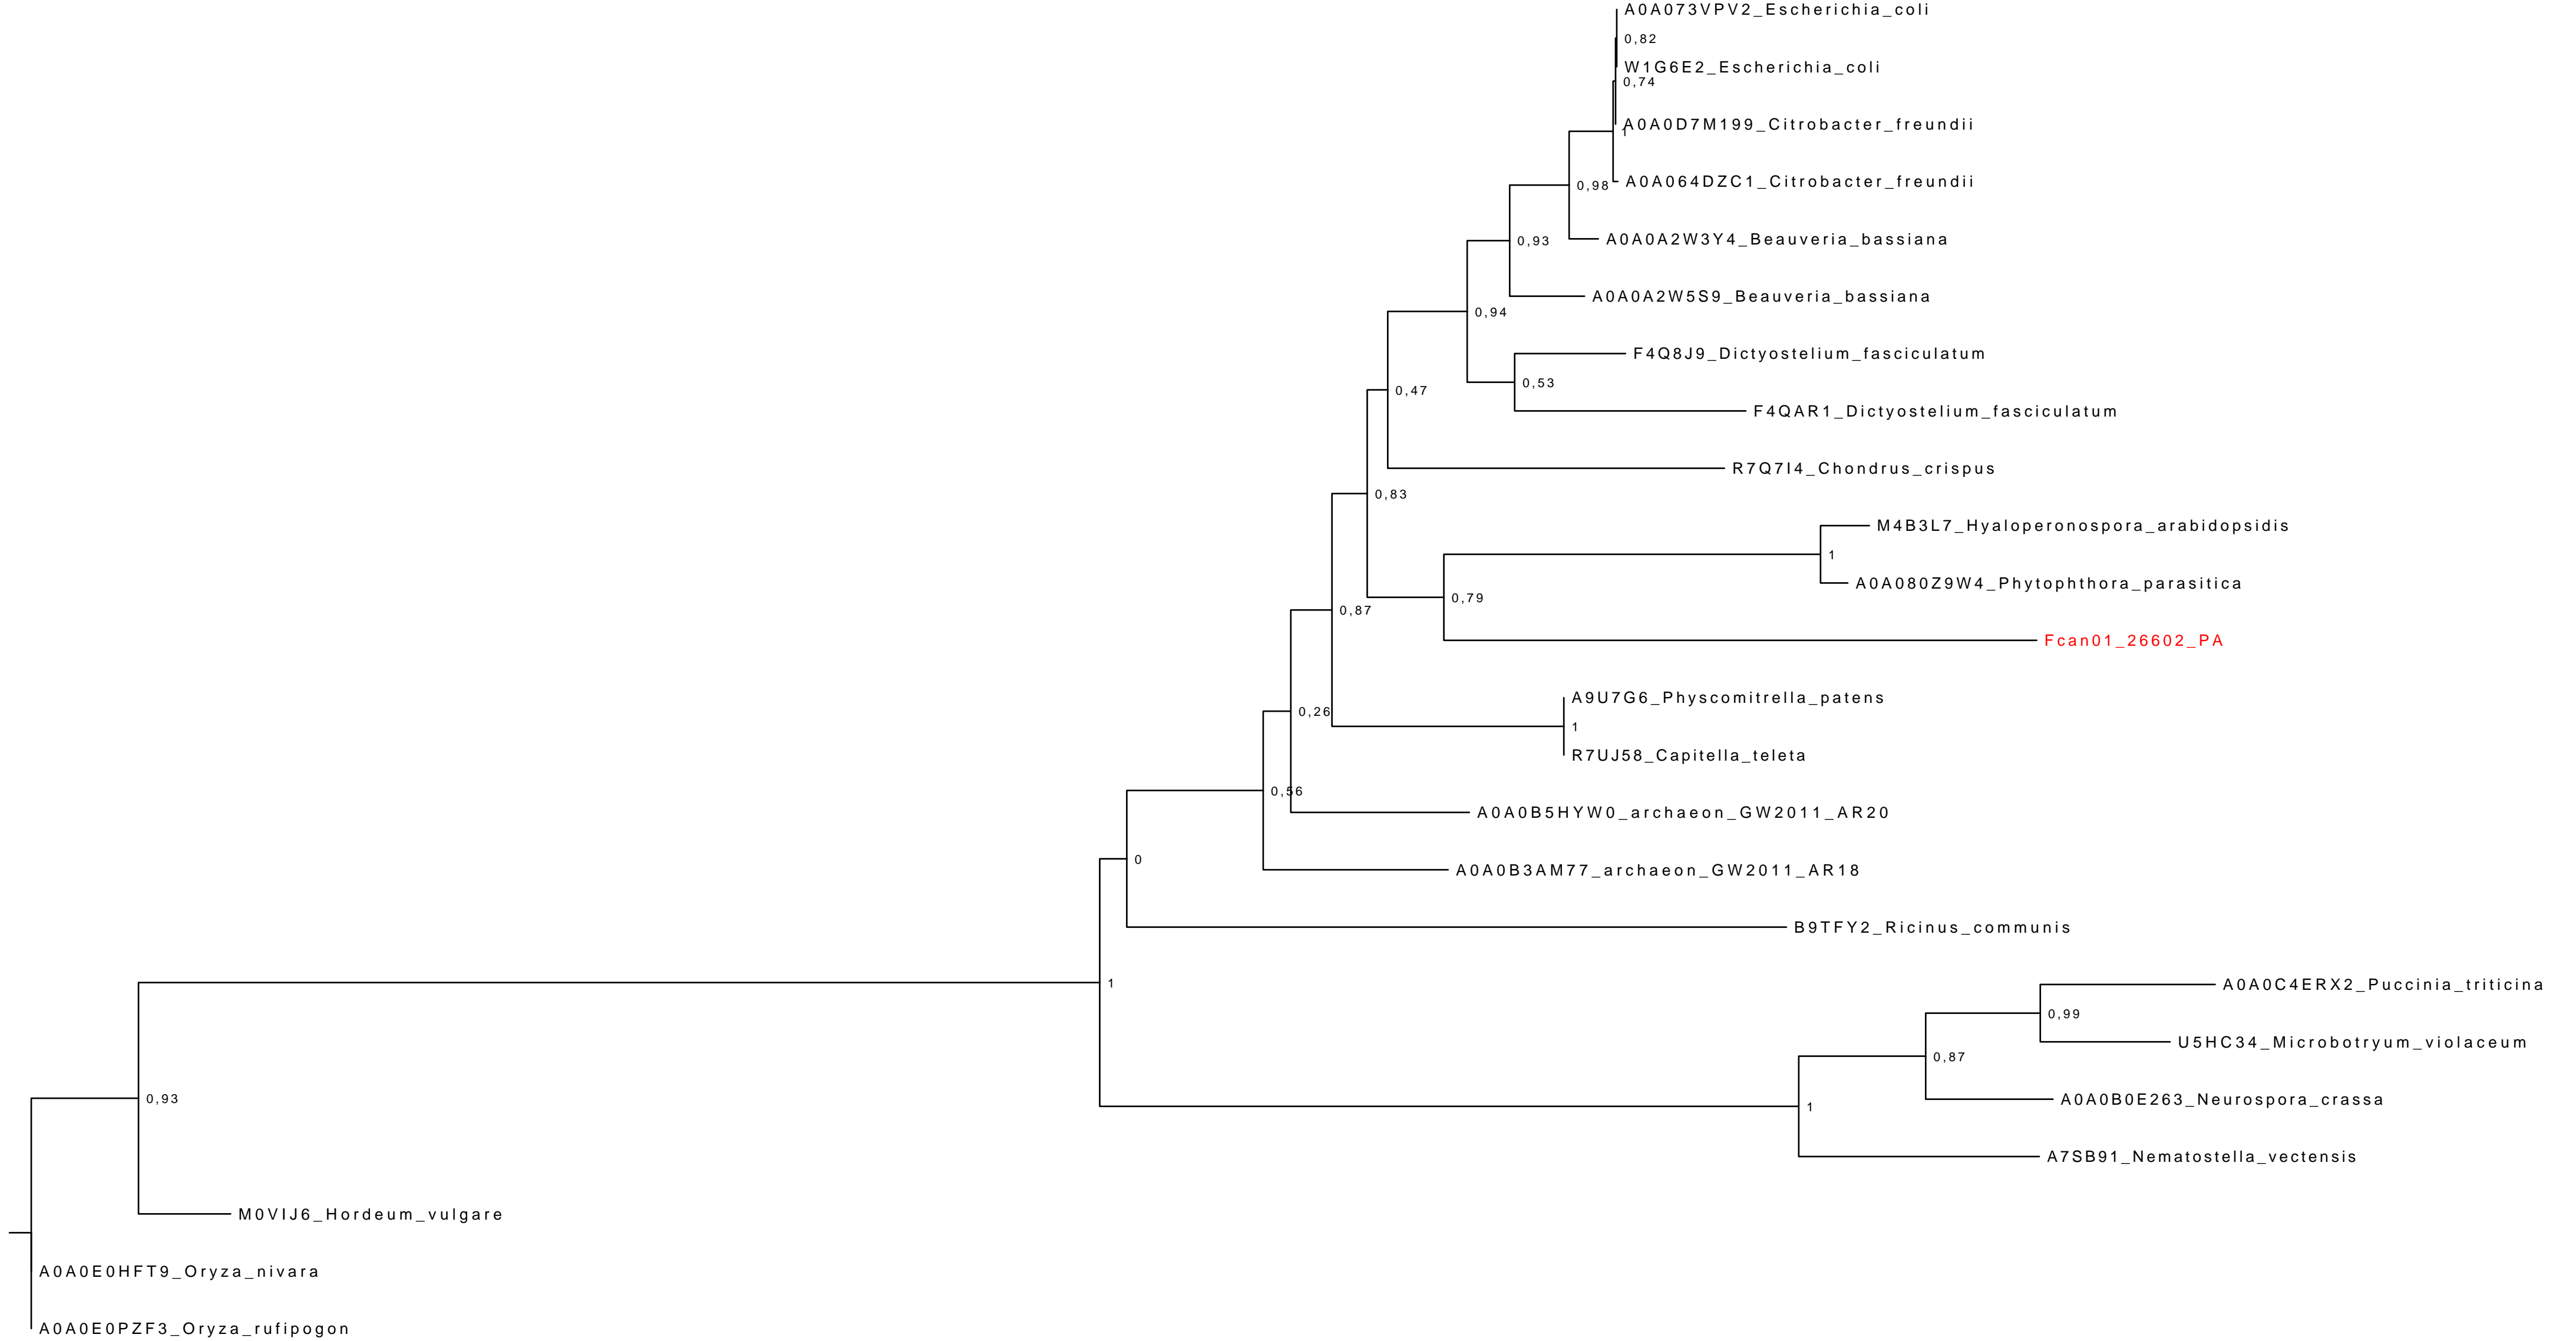

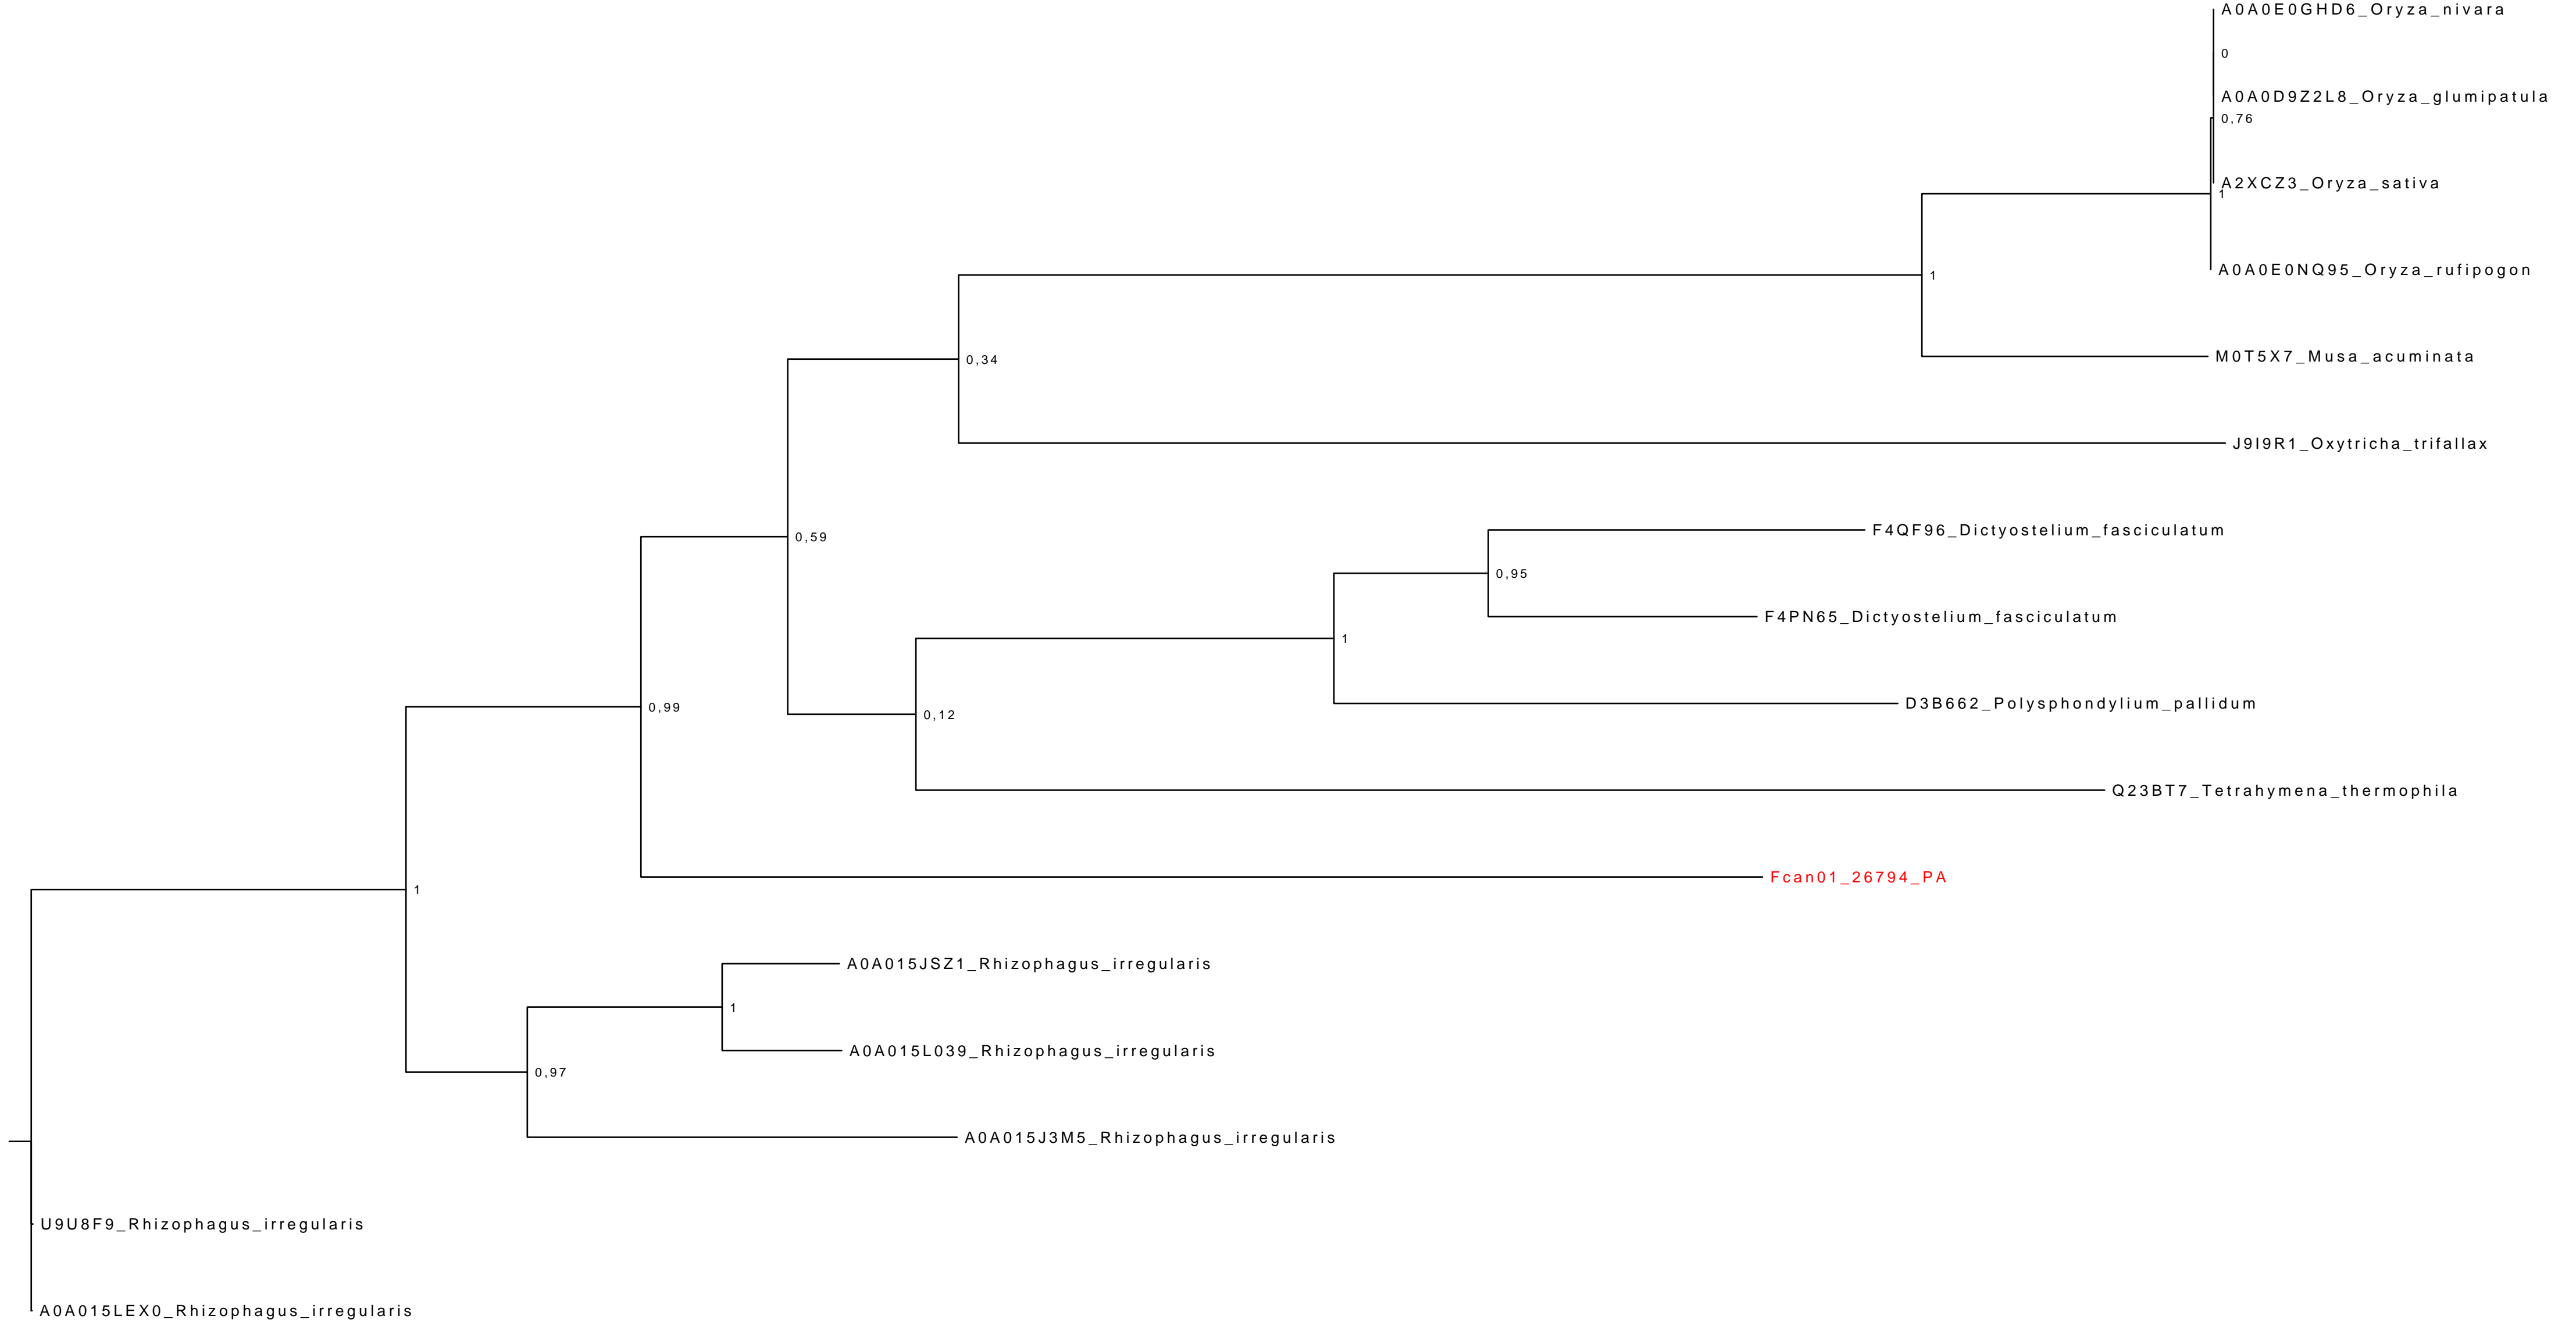

0.3



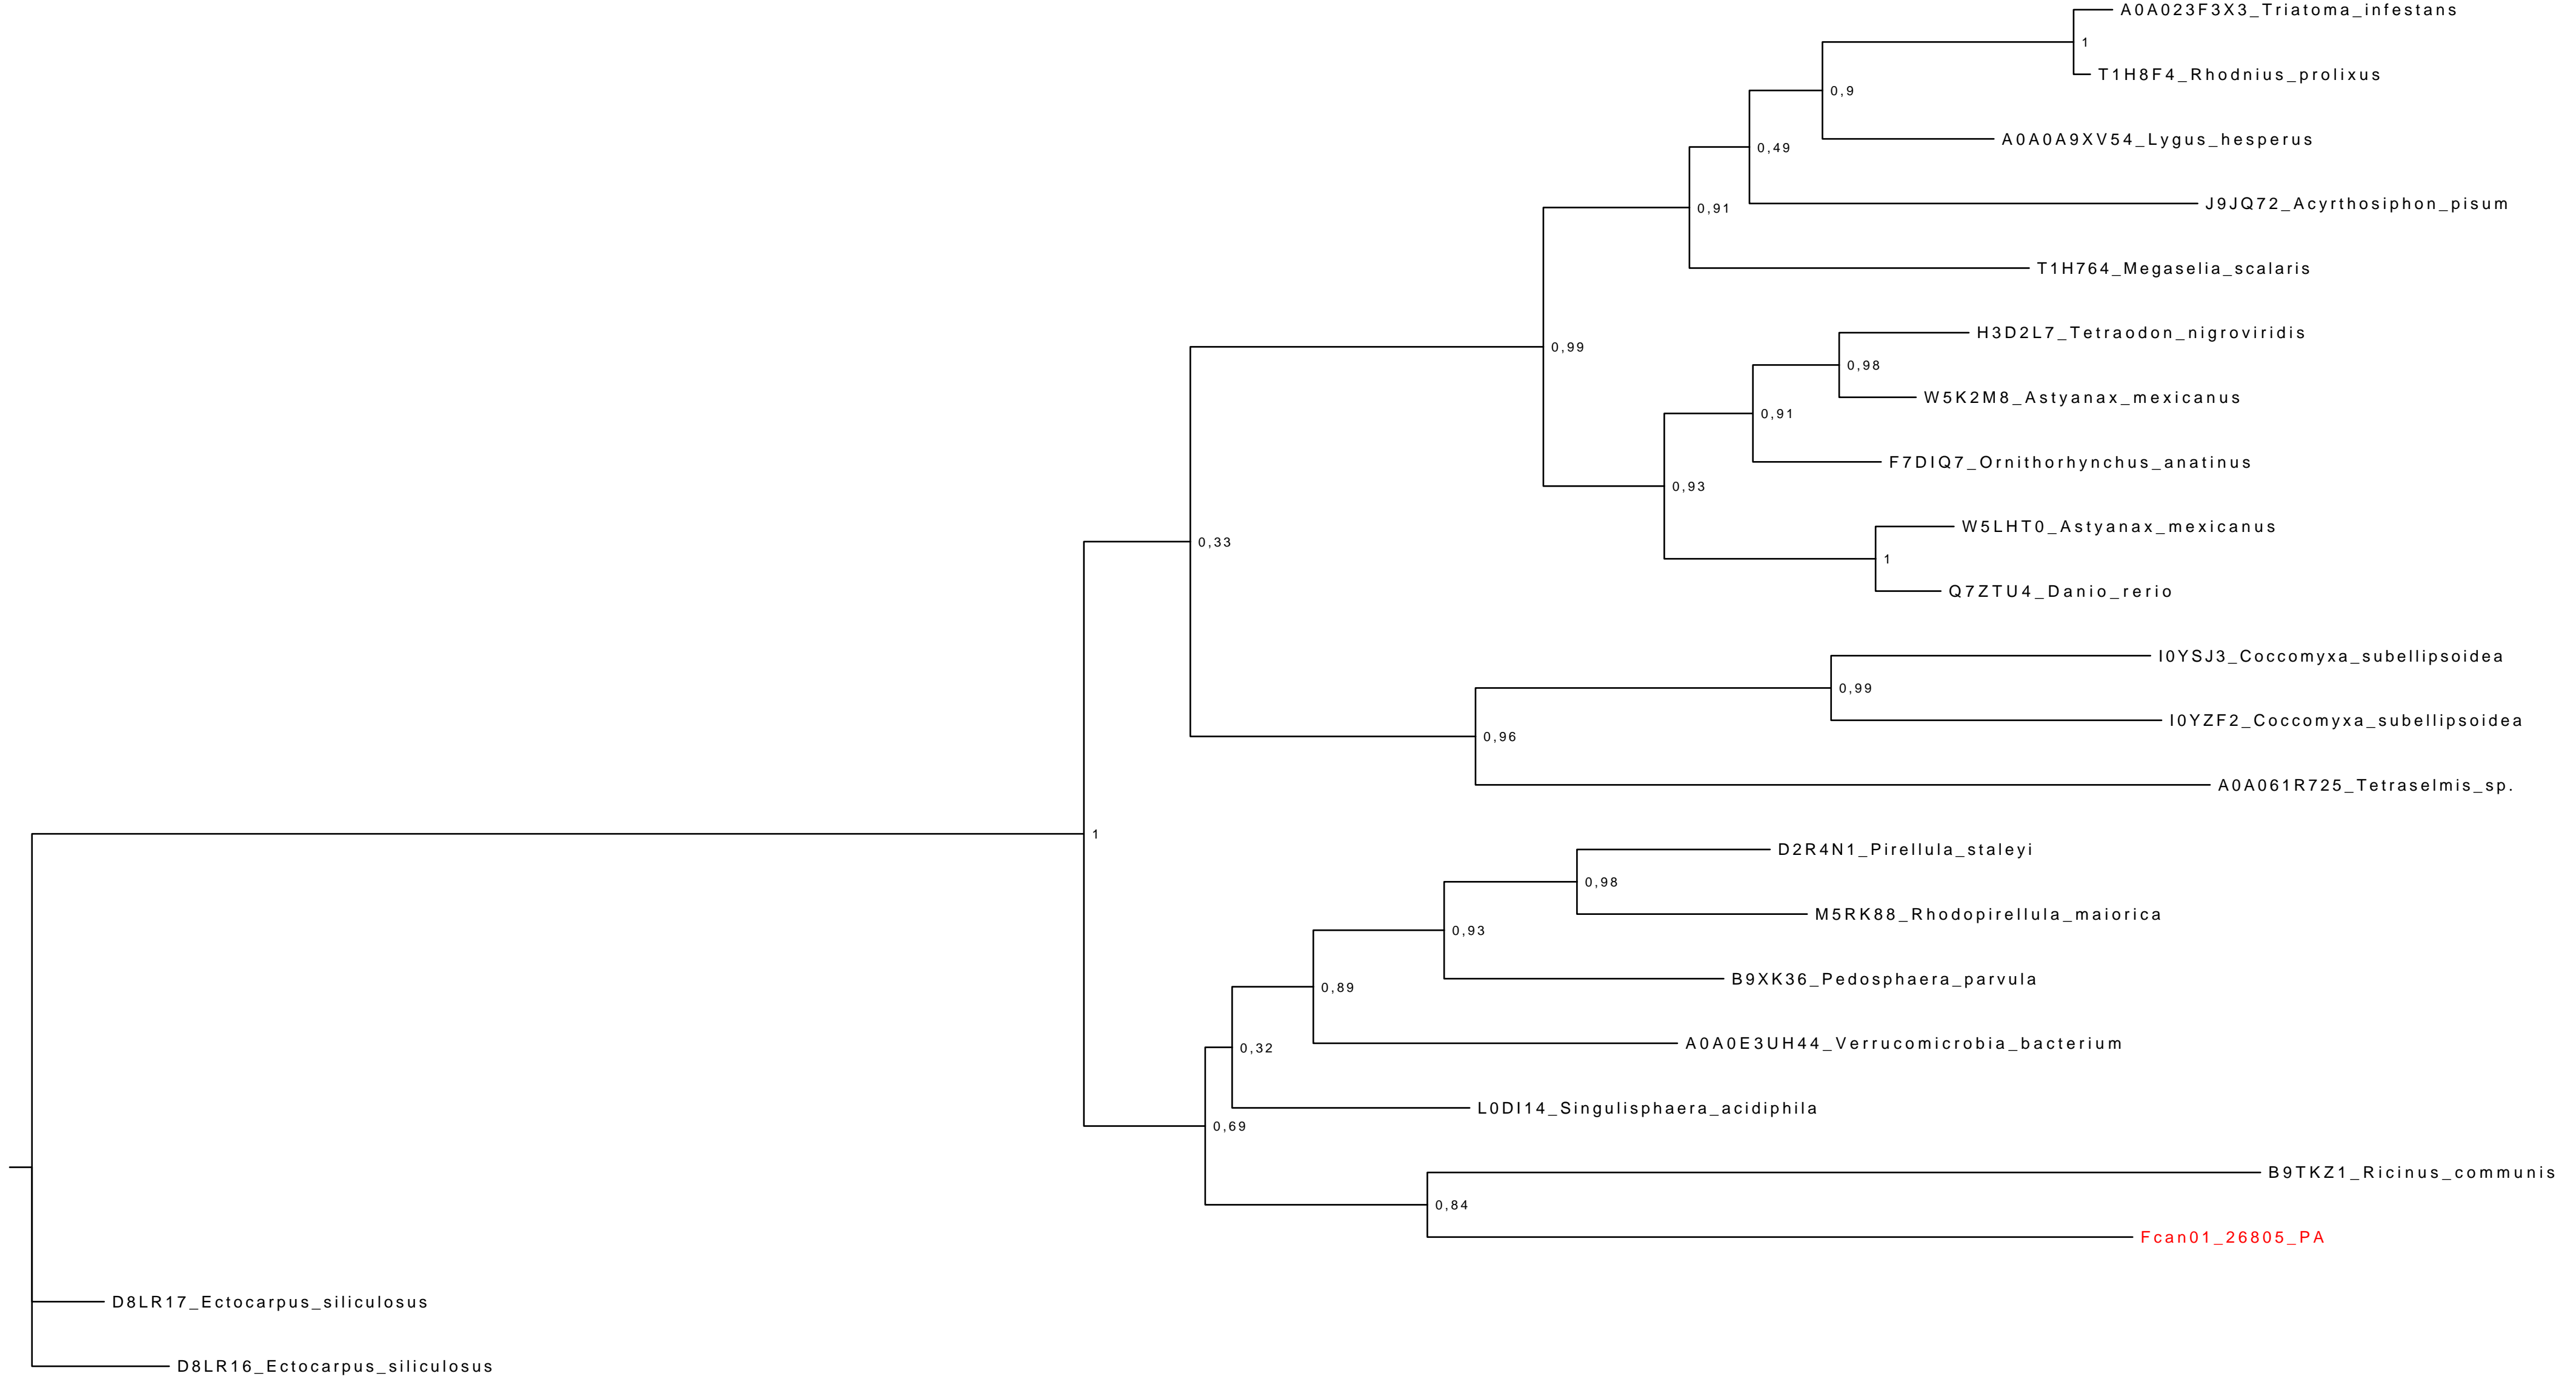

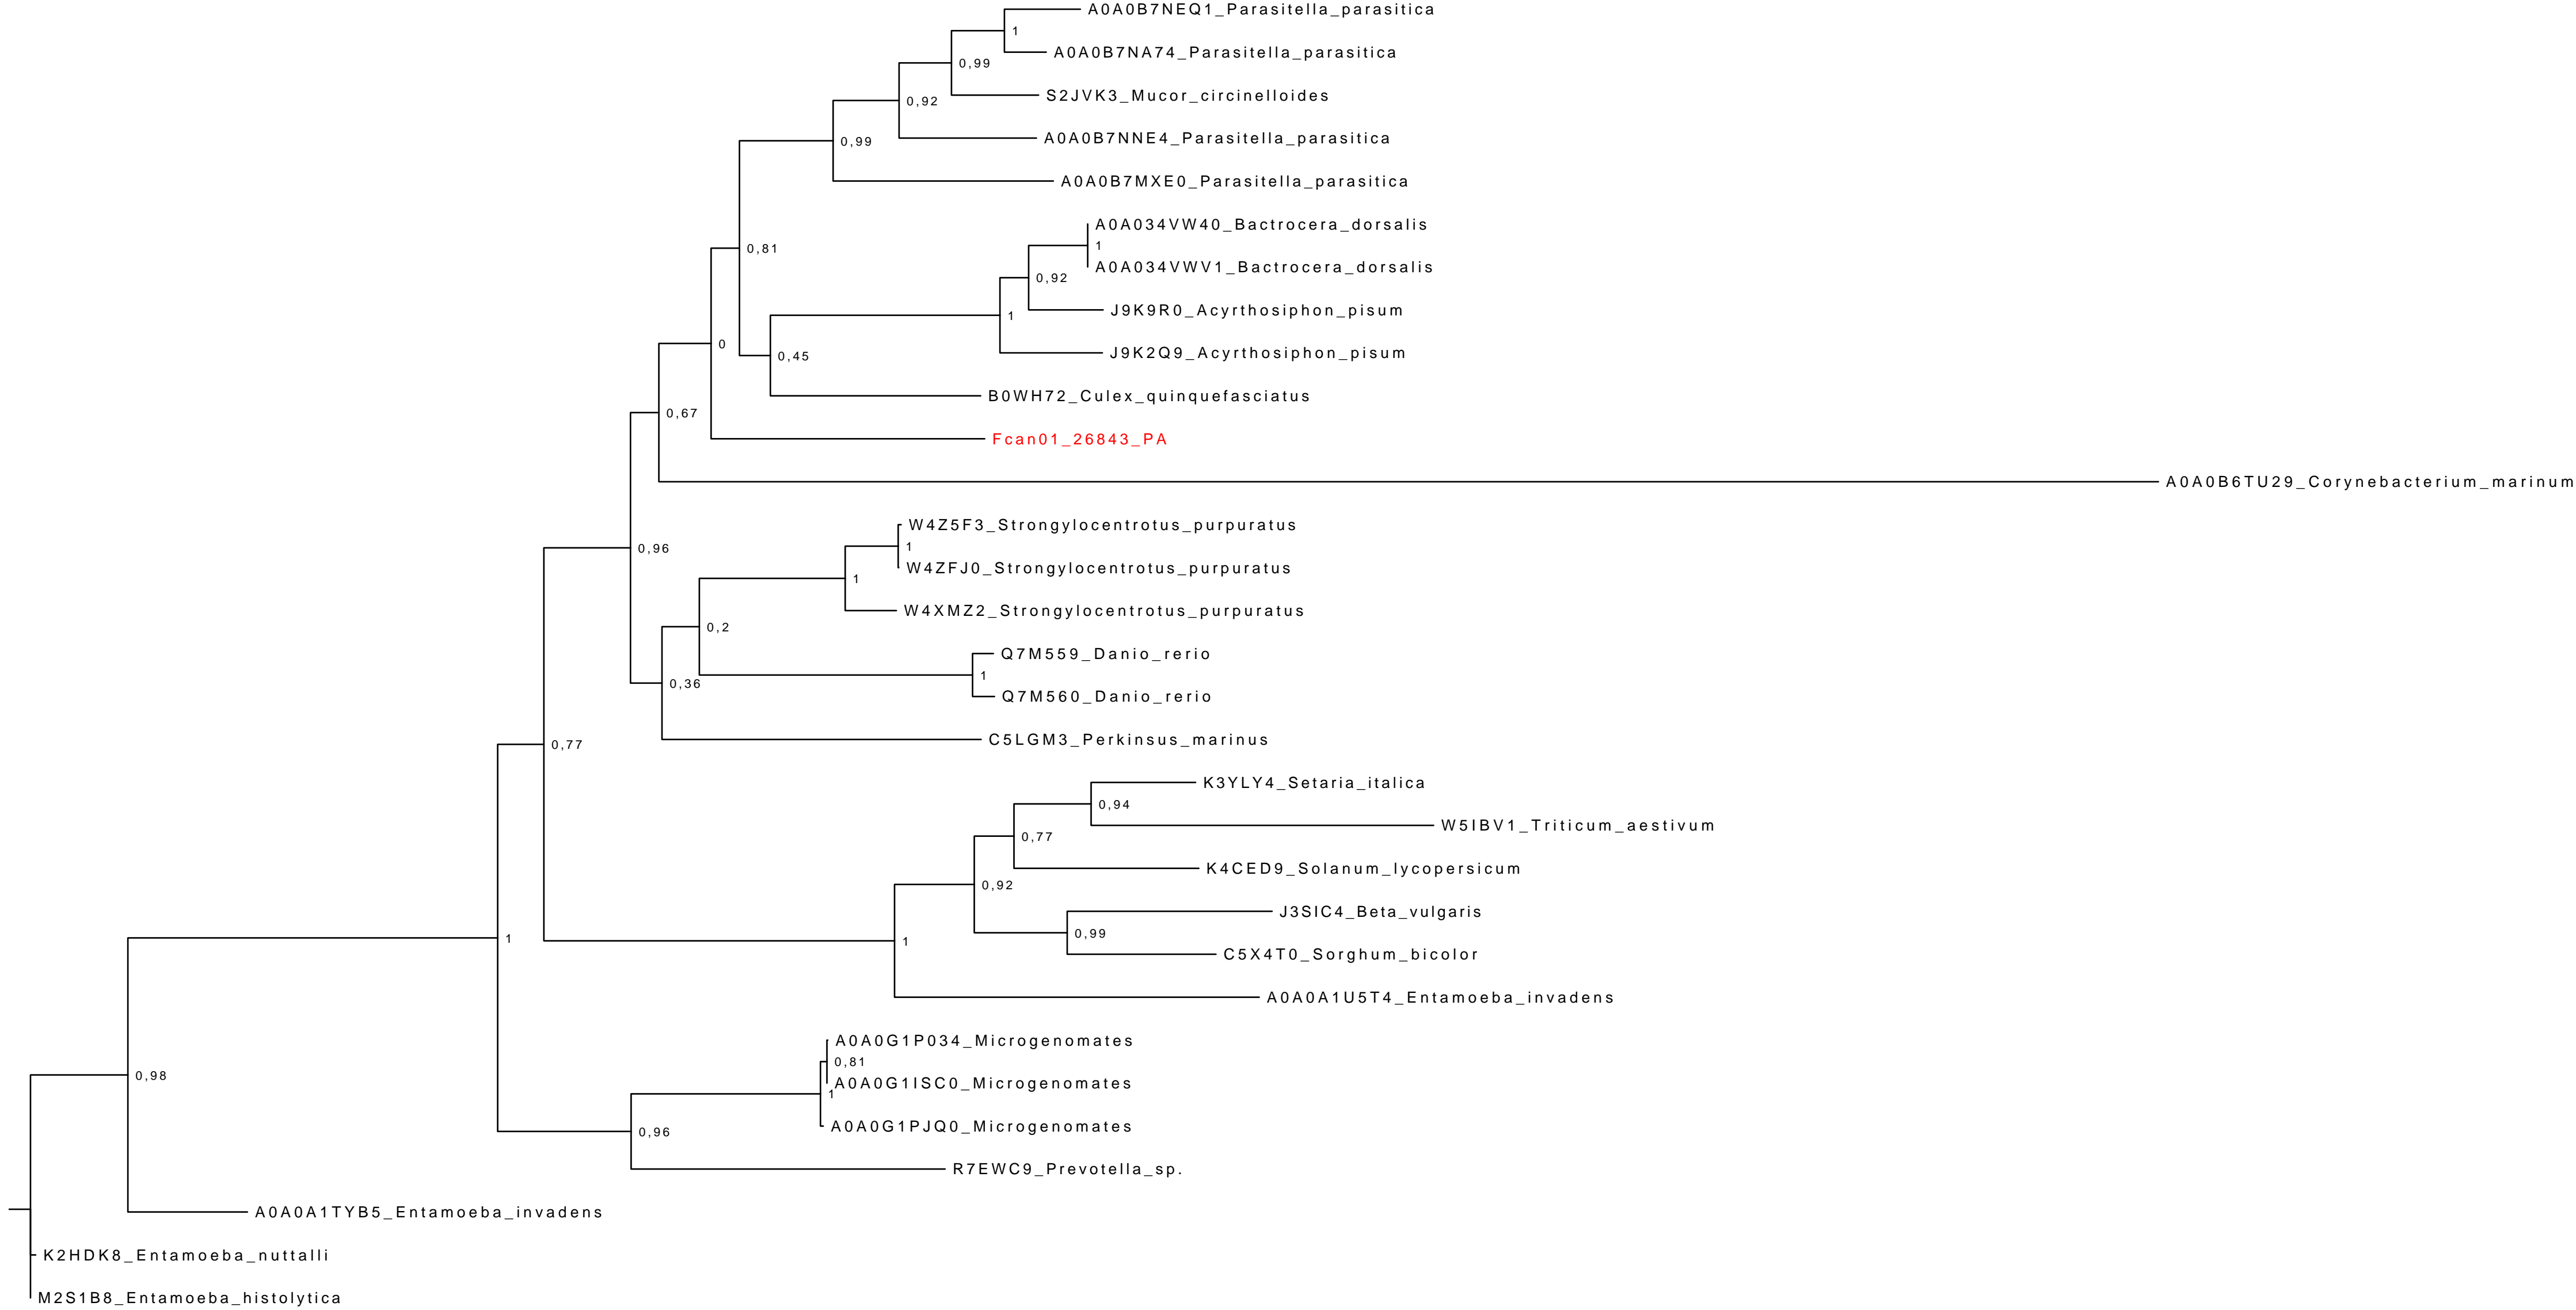

0.8

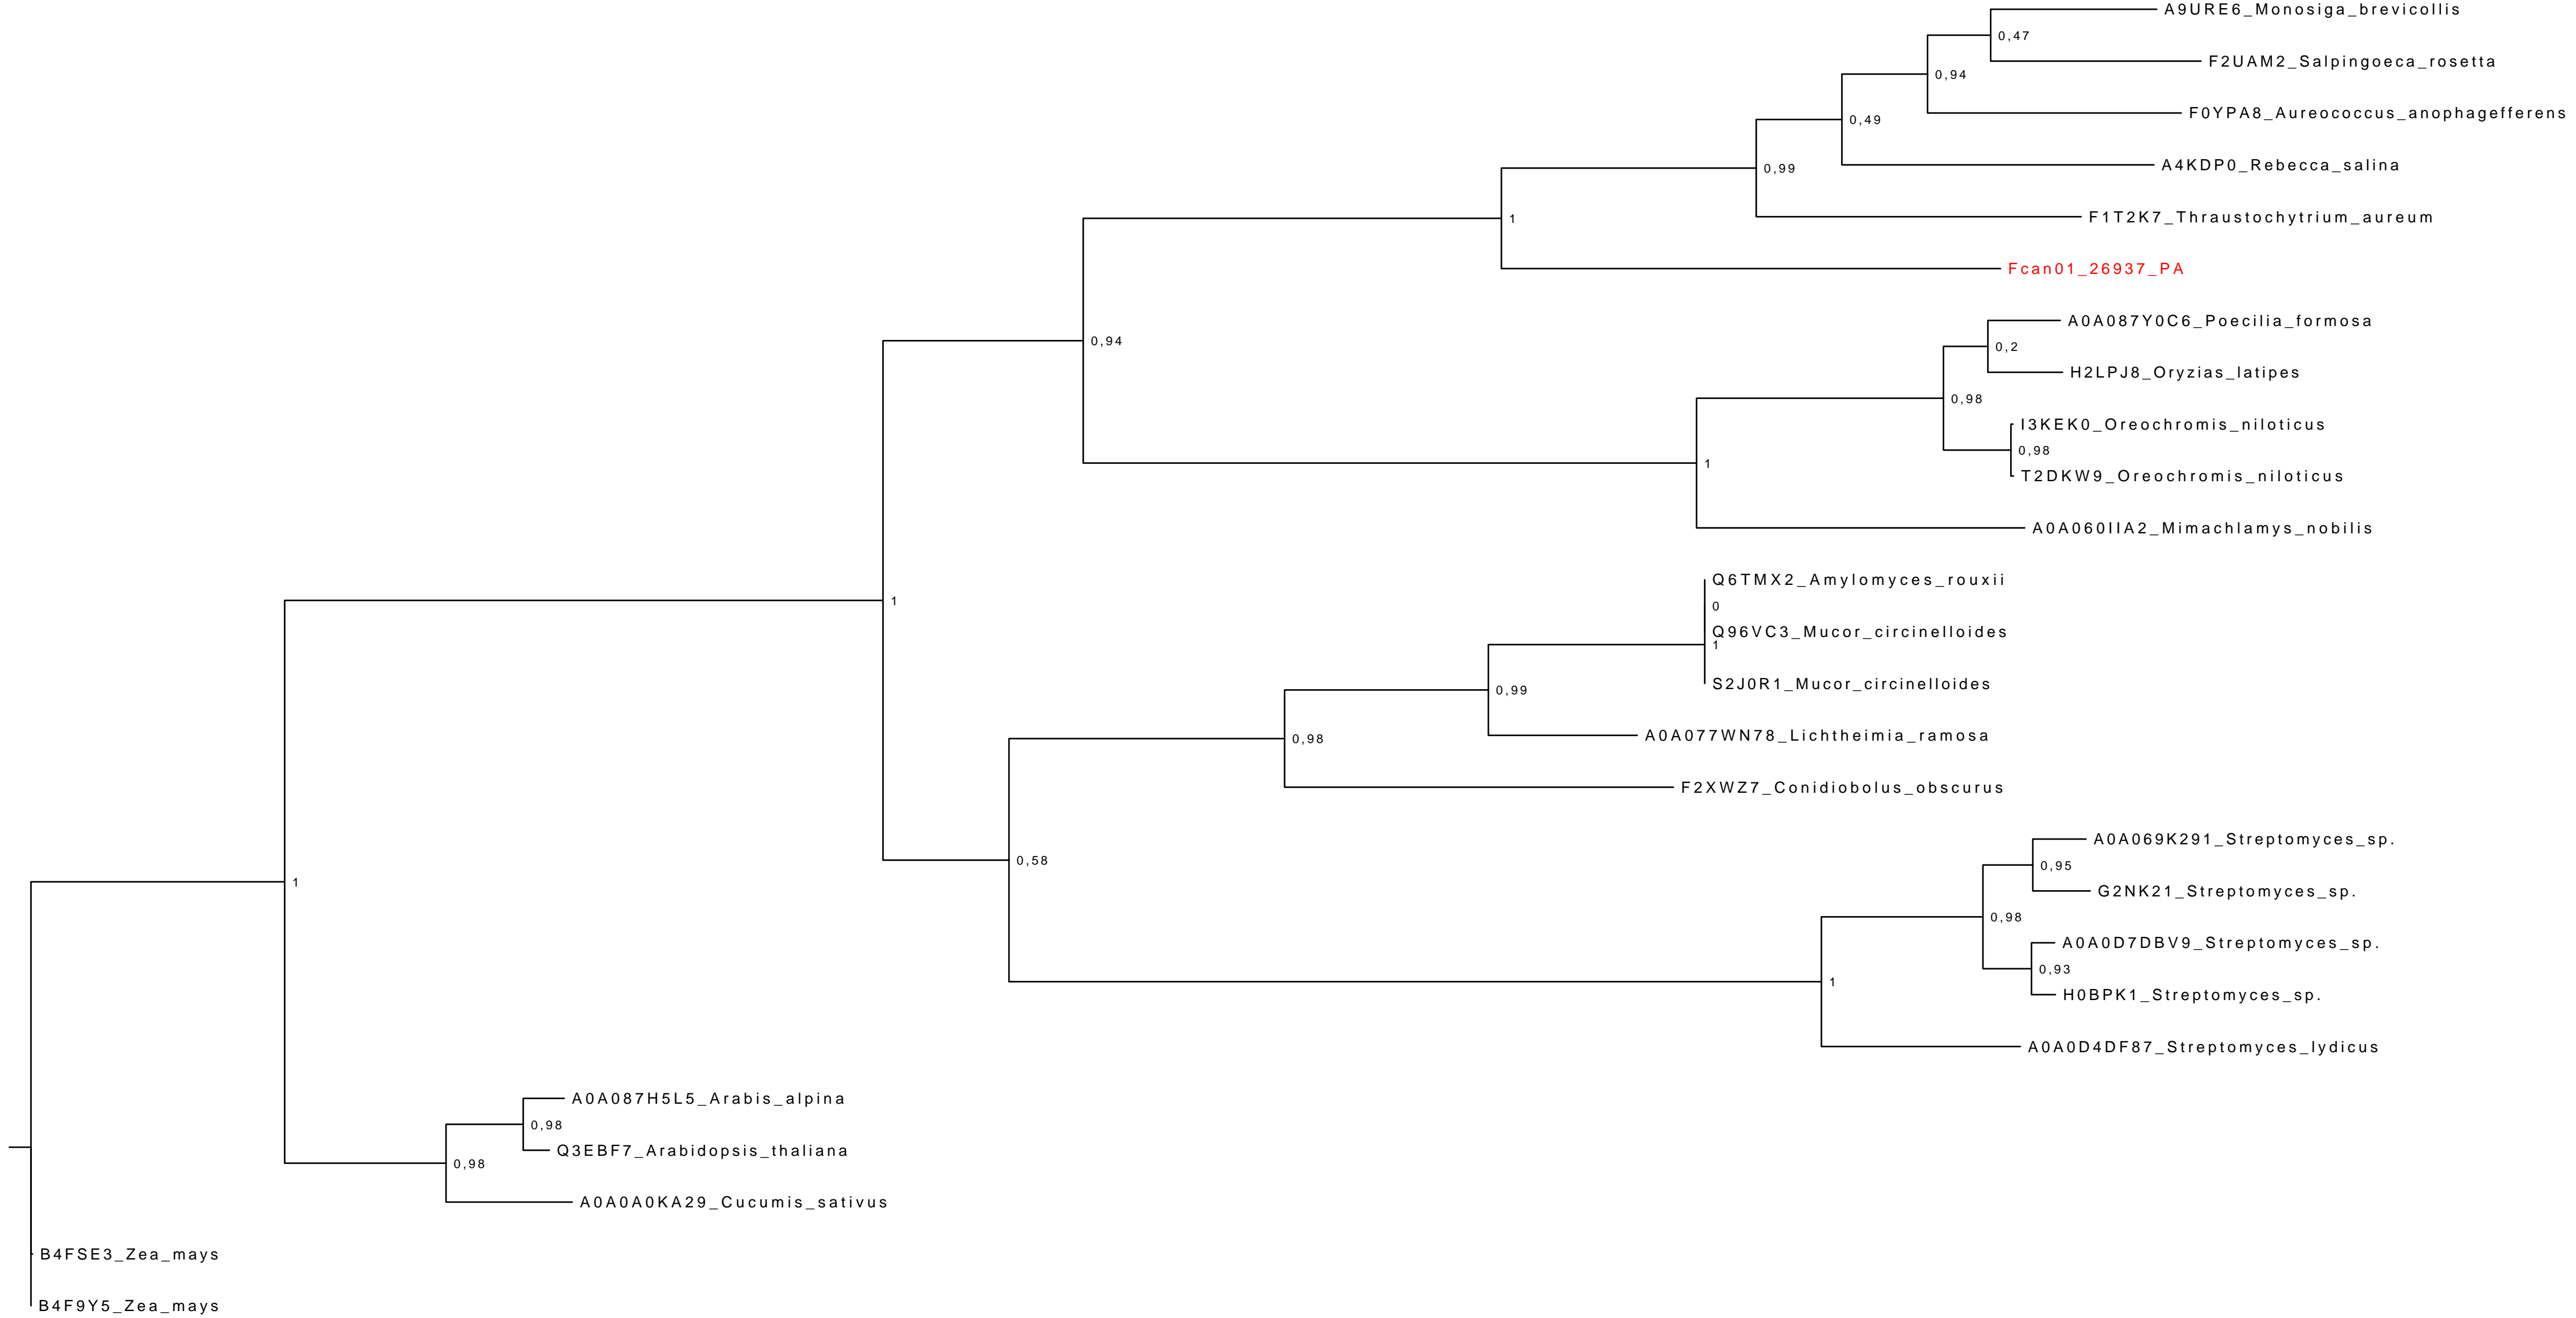

0.4

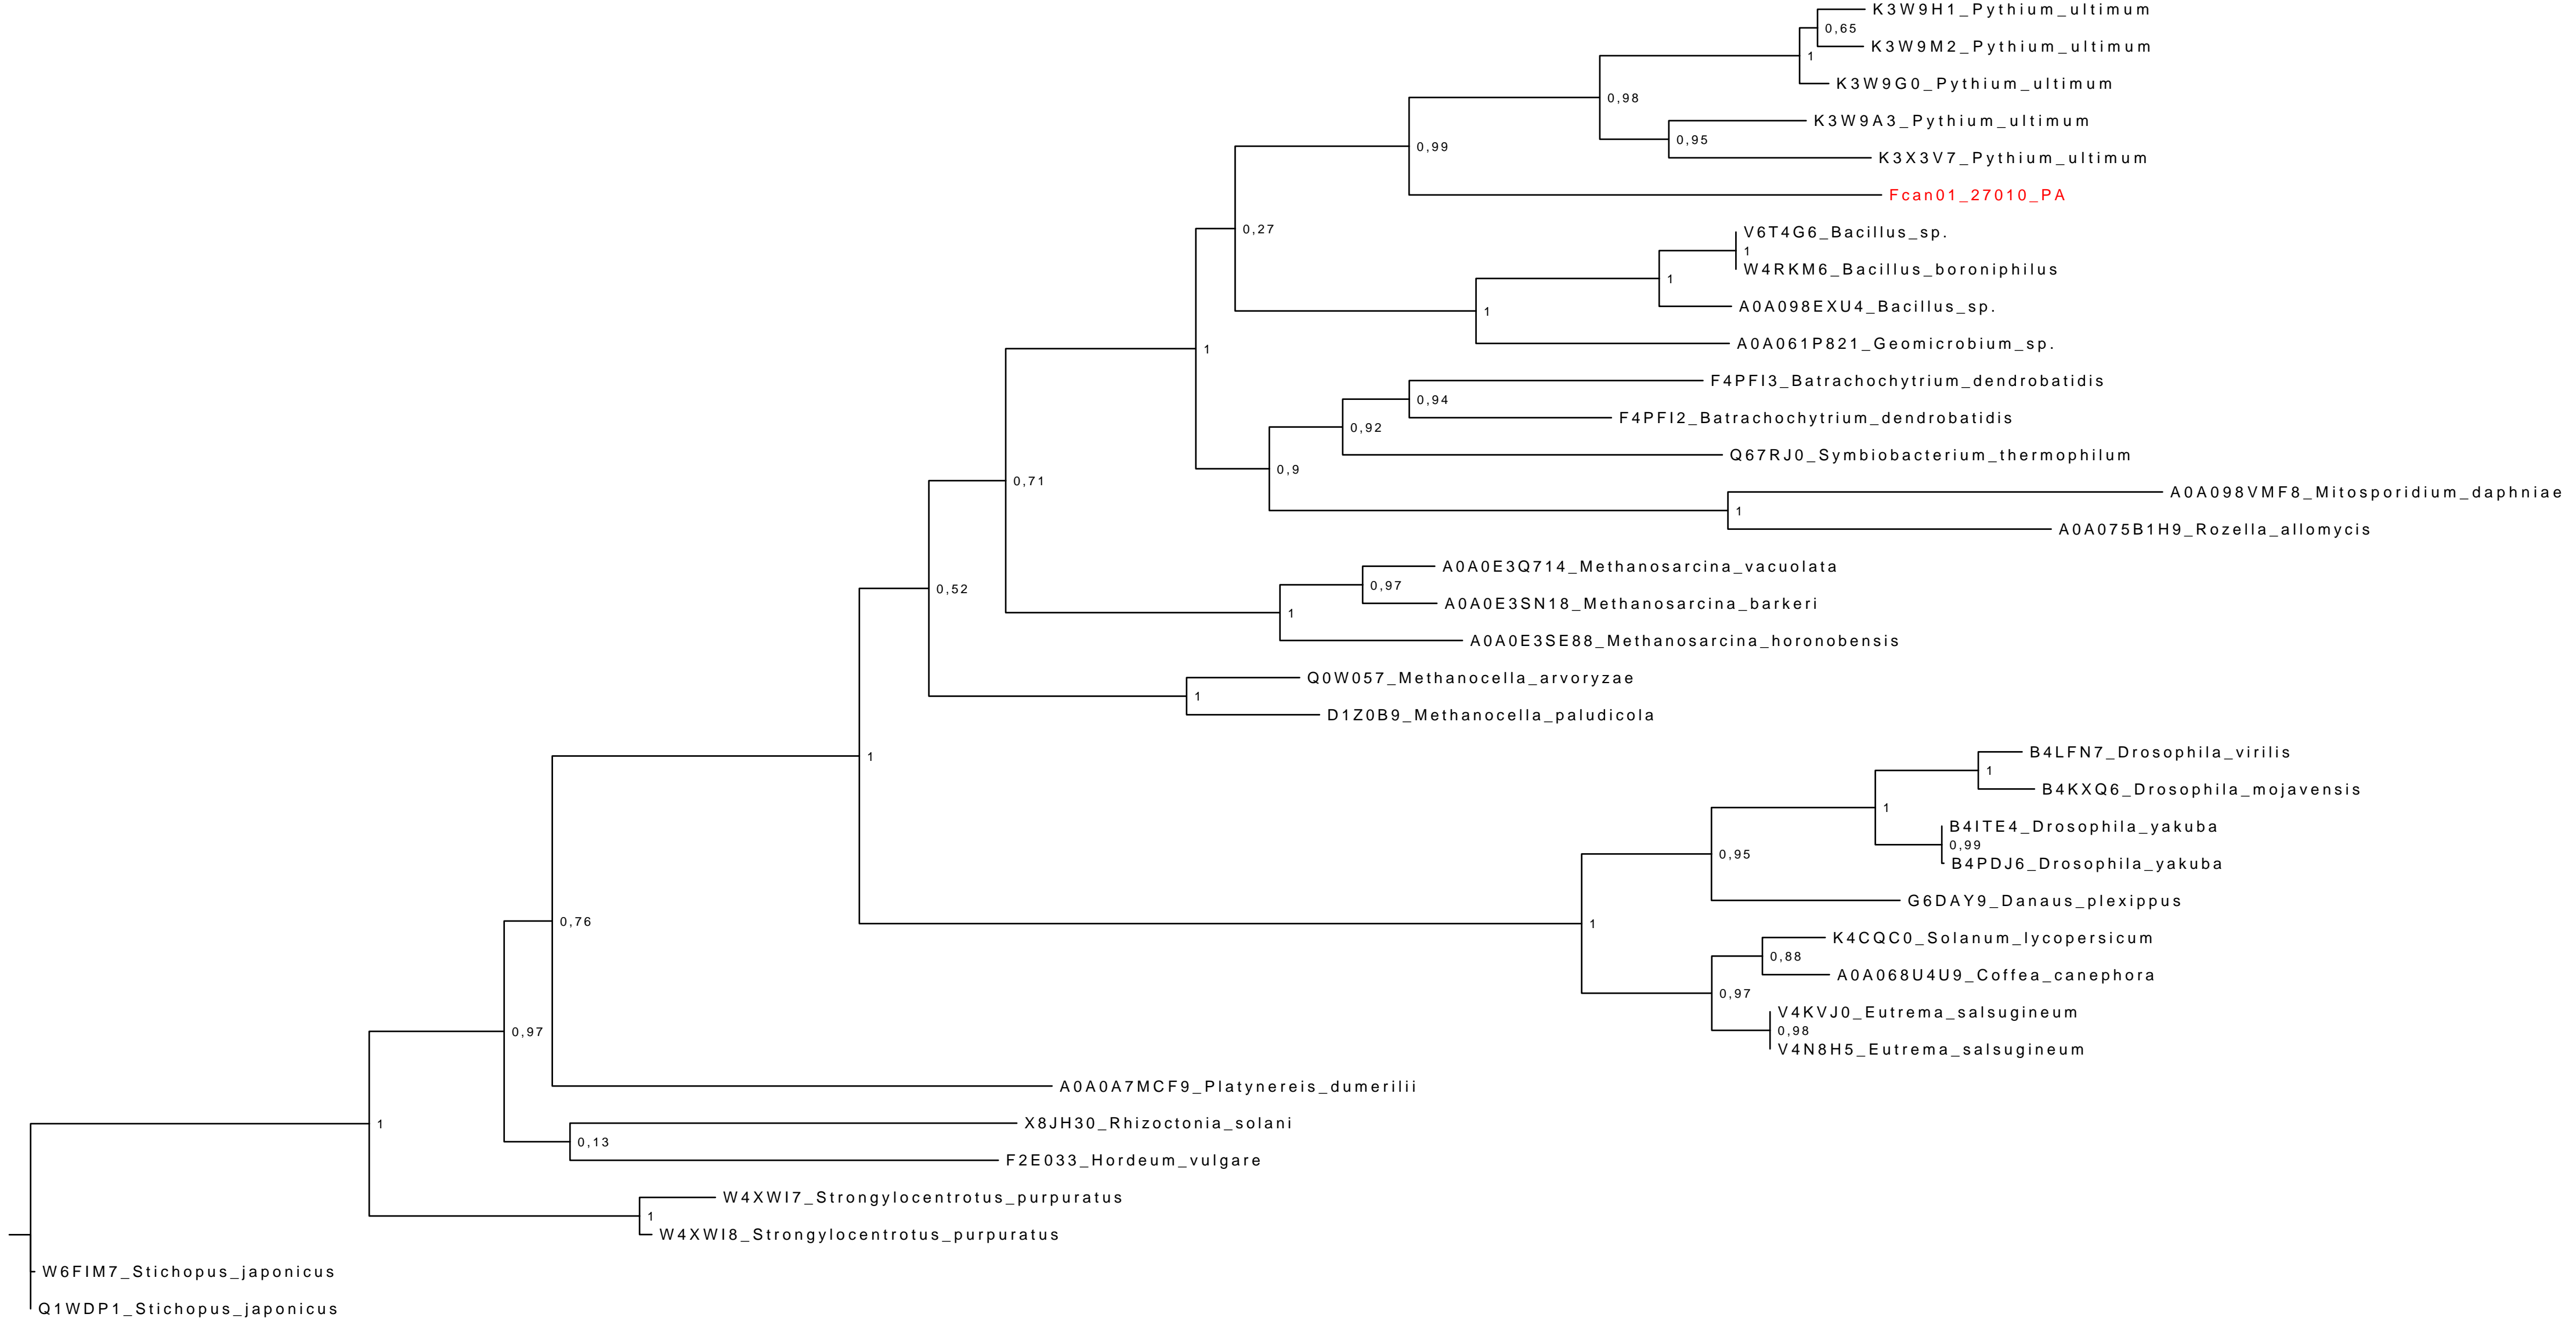

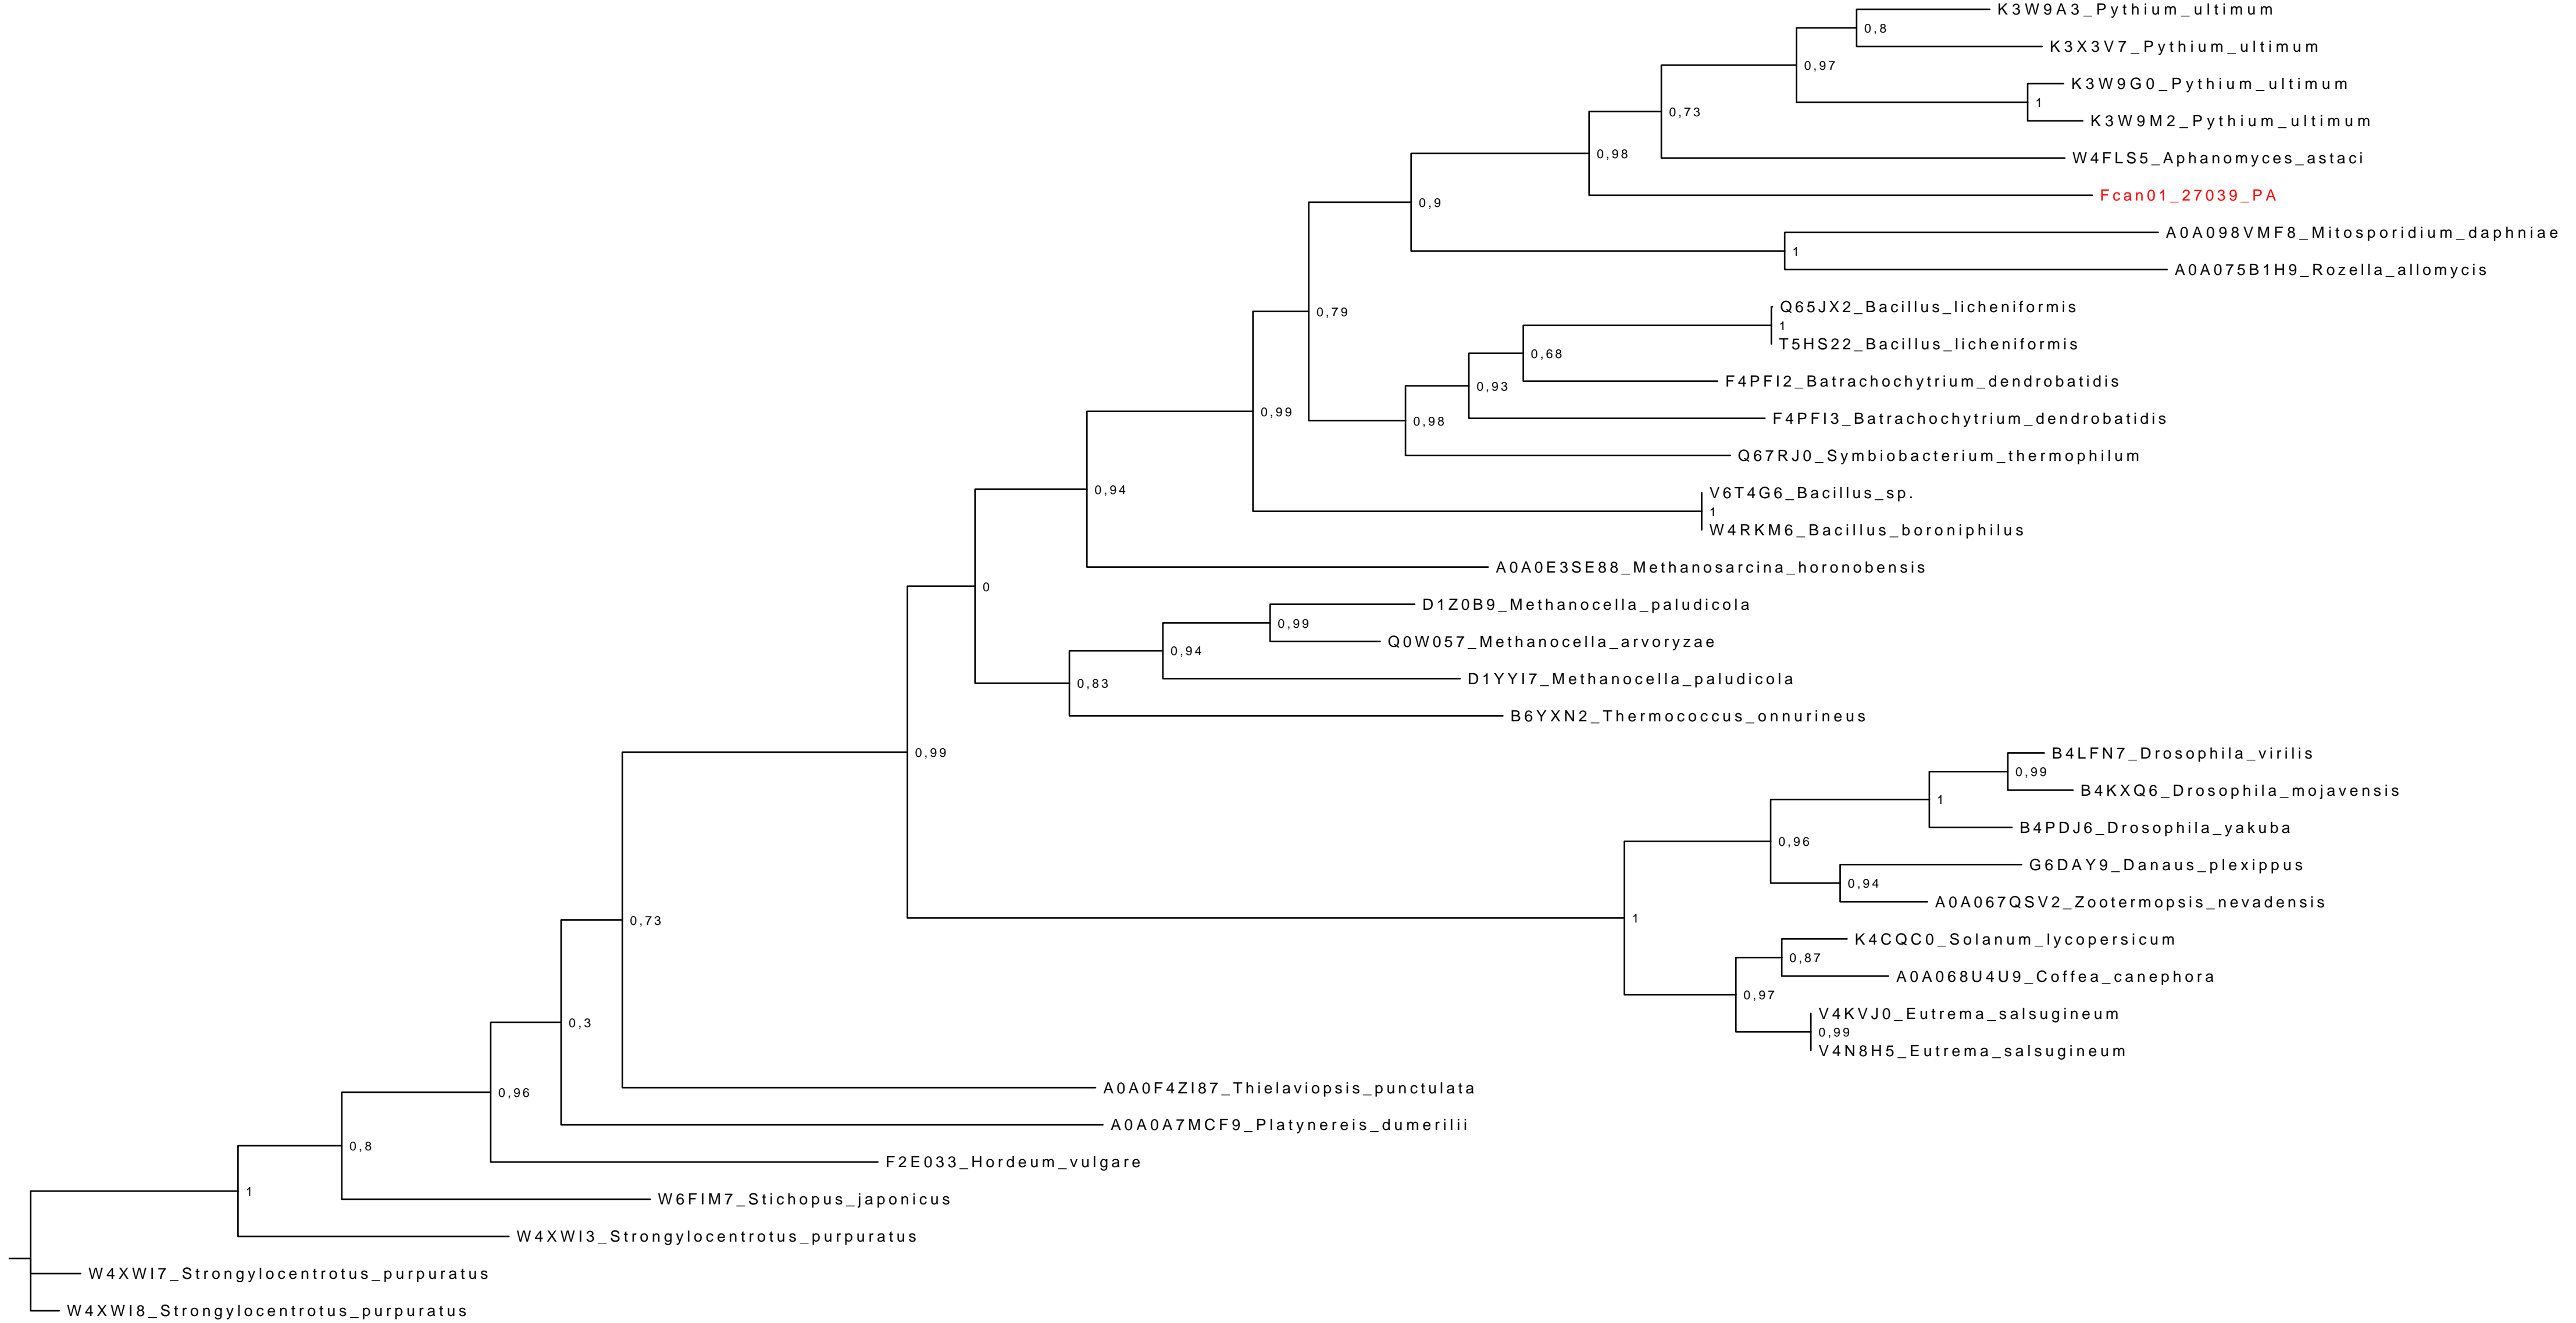

0.5

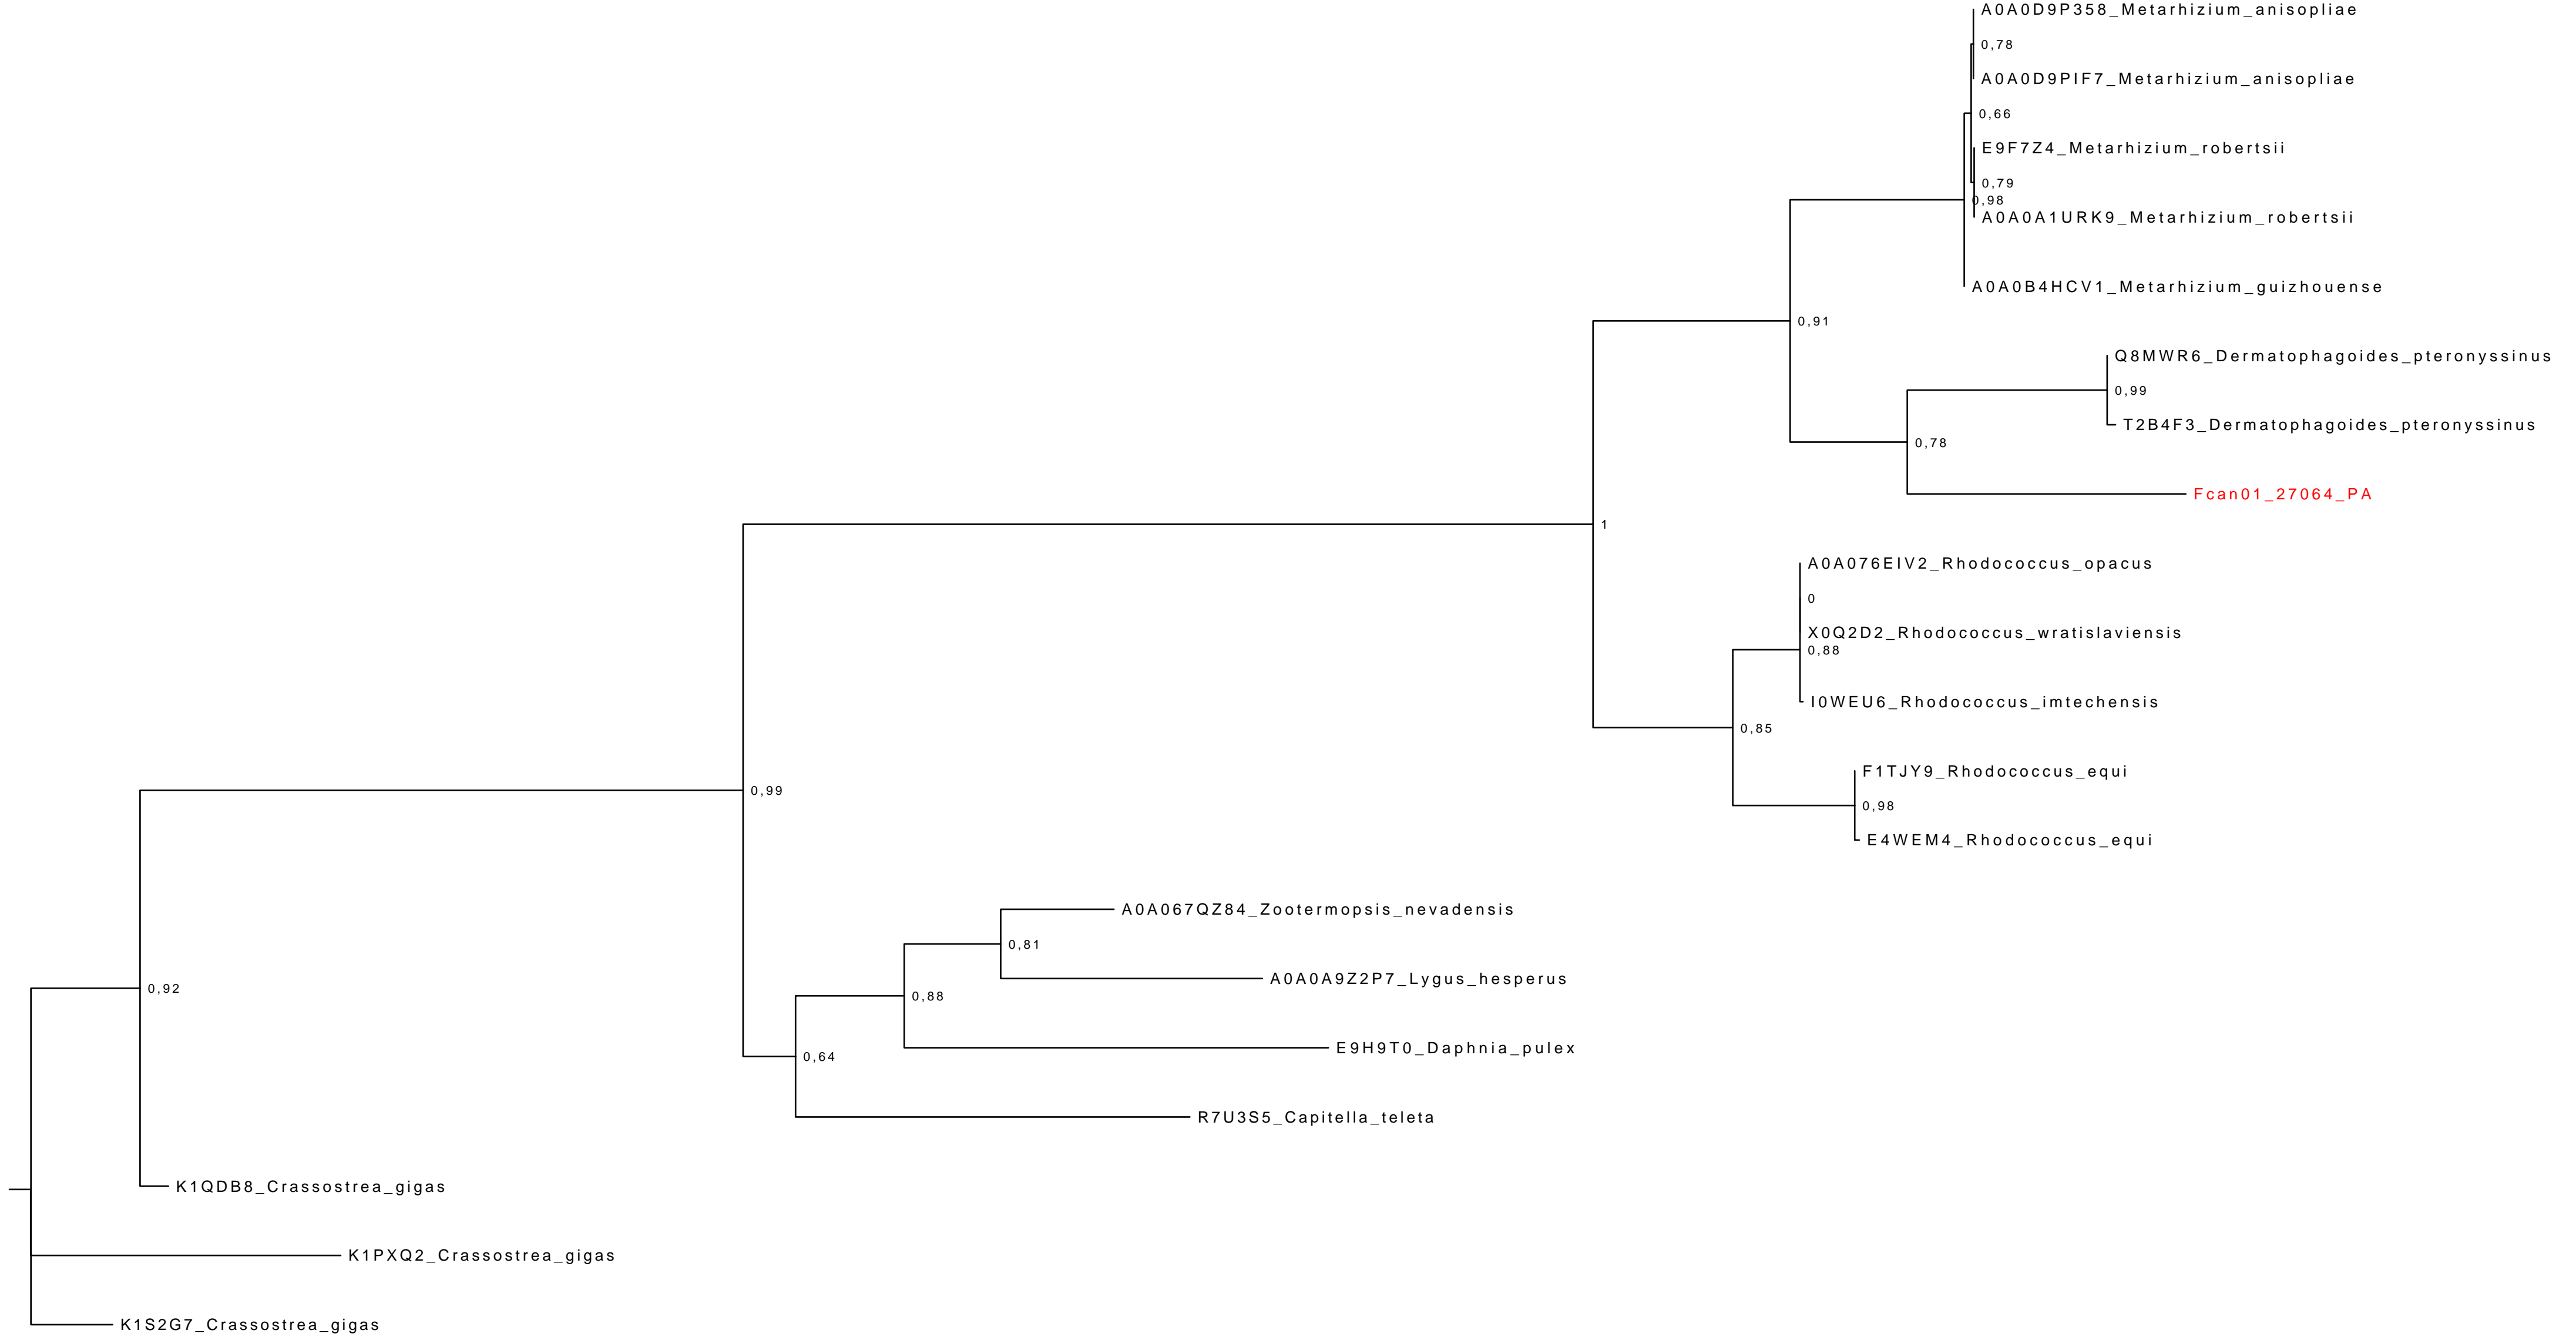

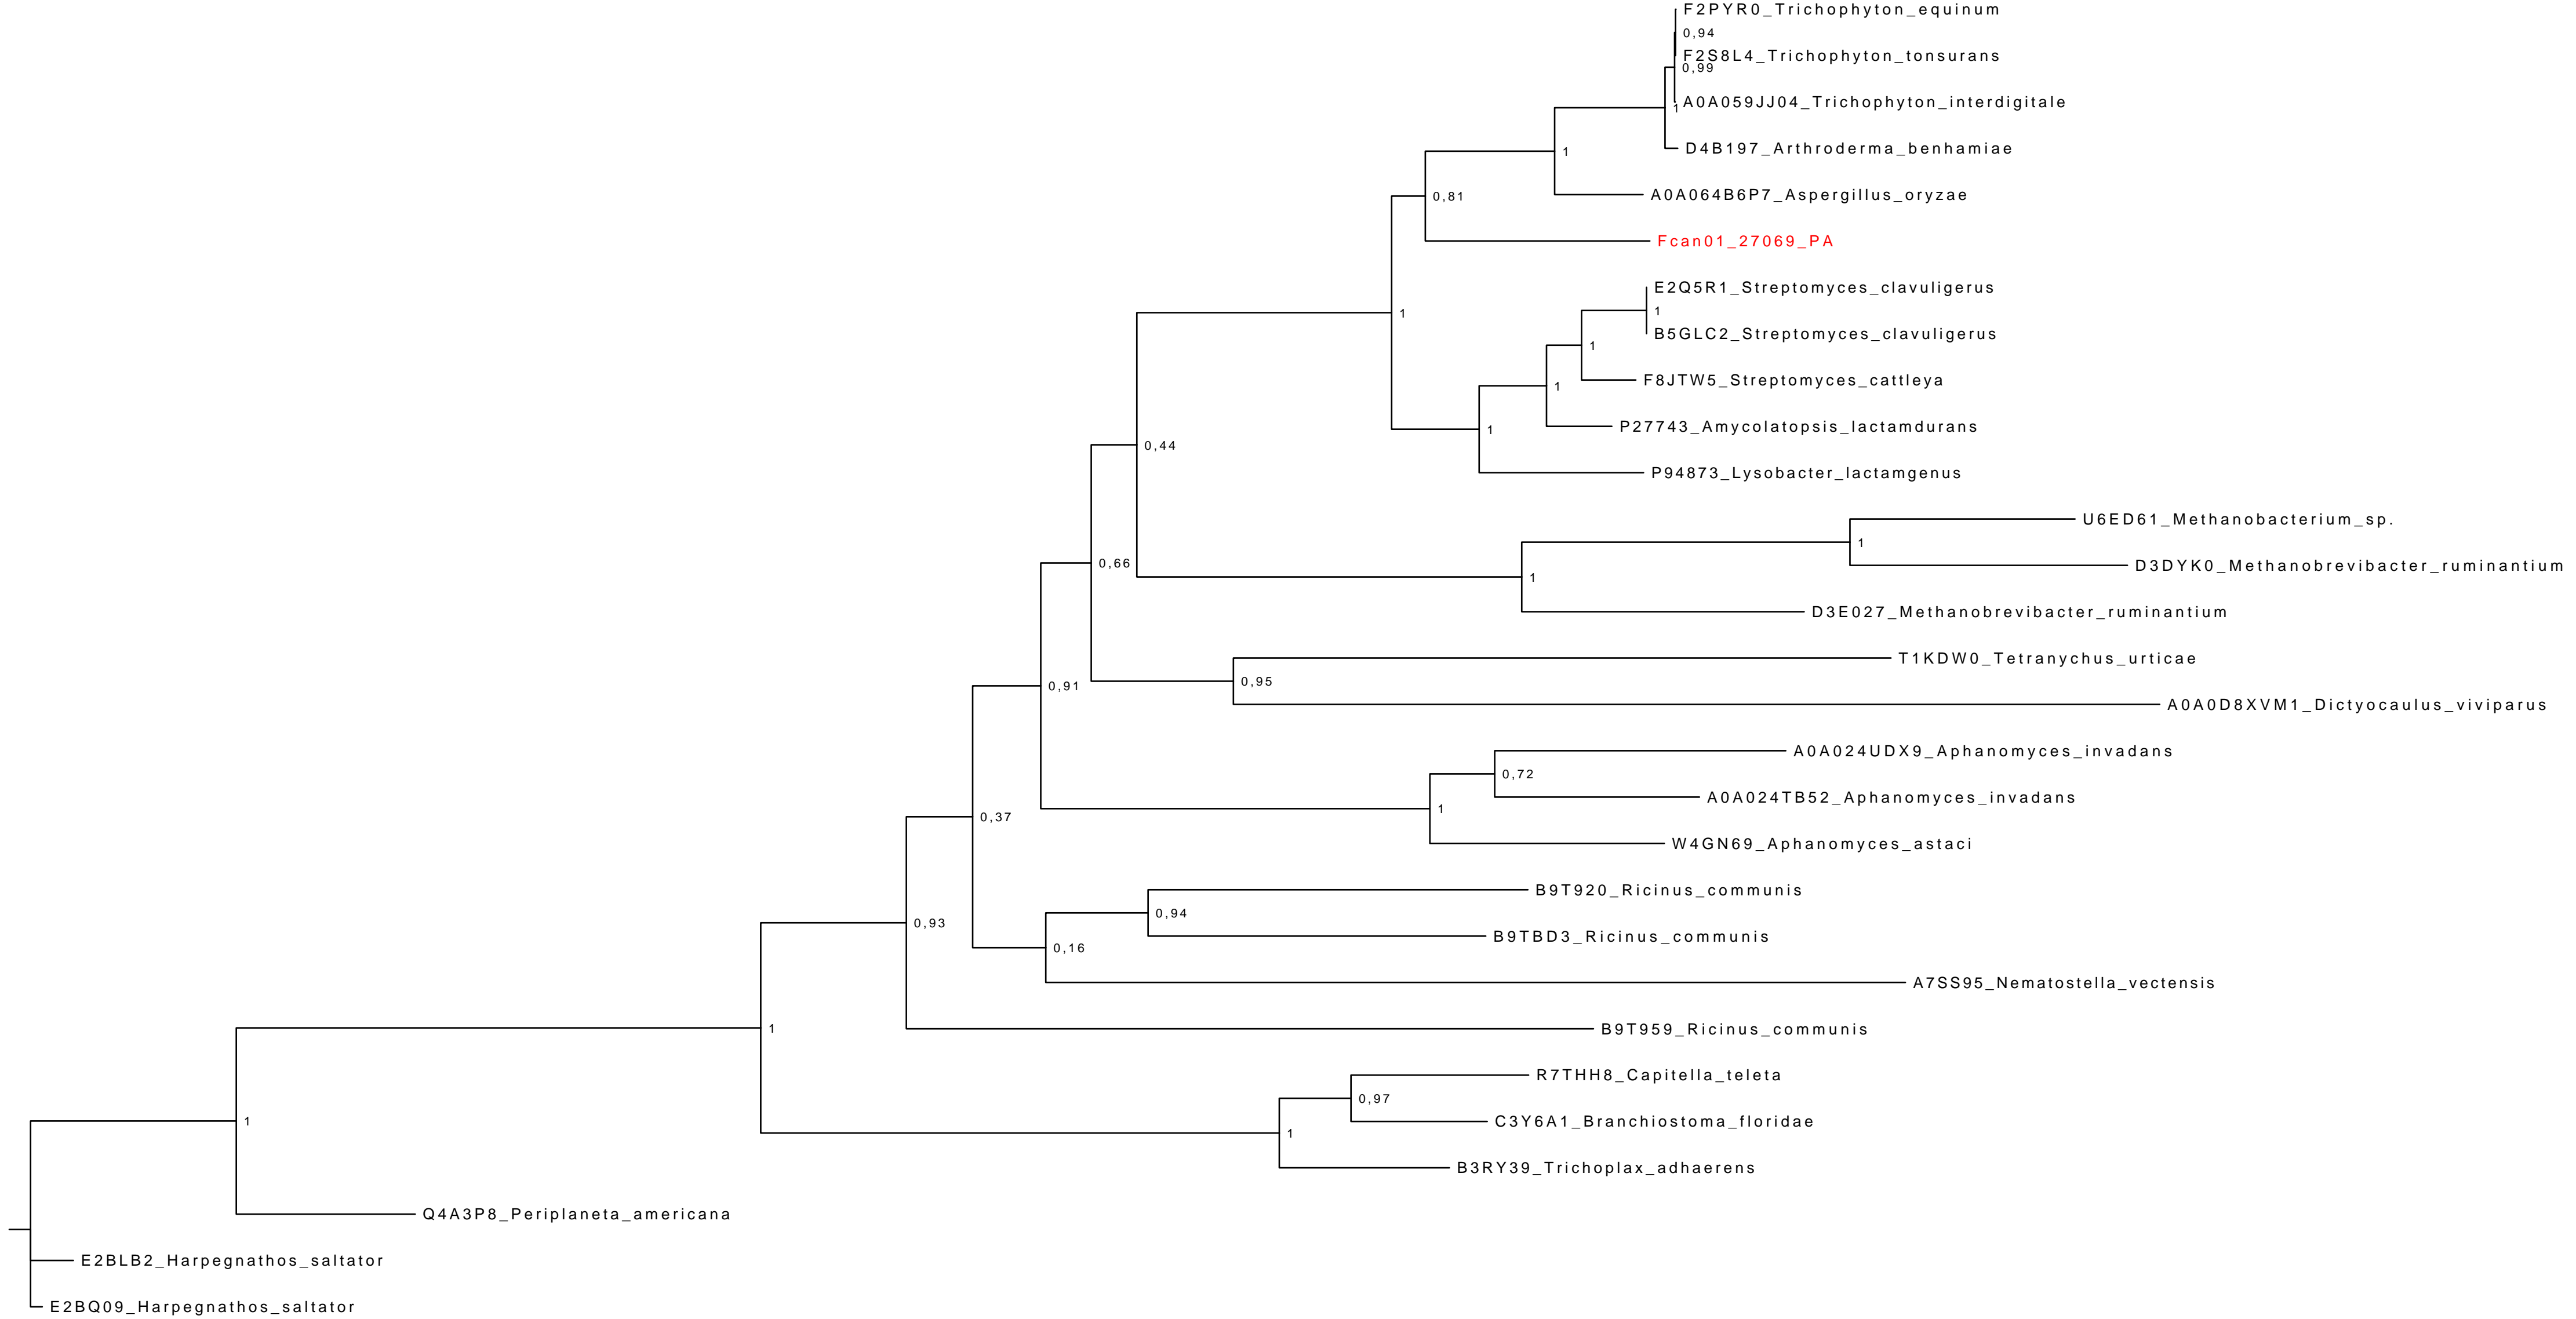

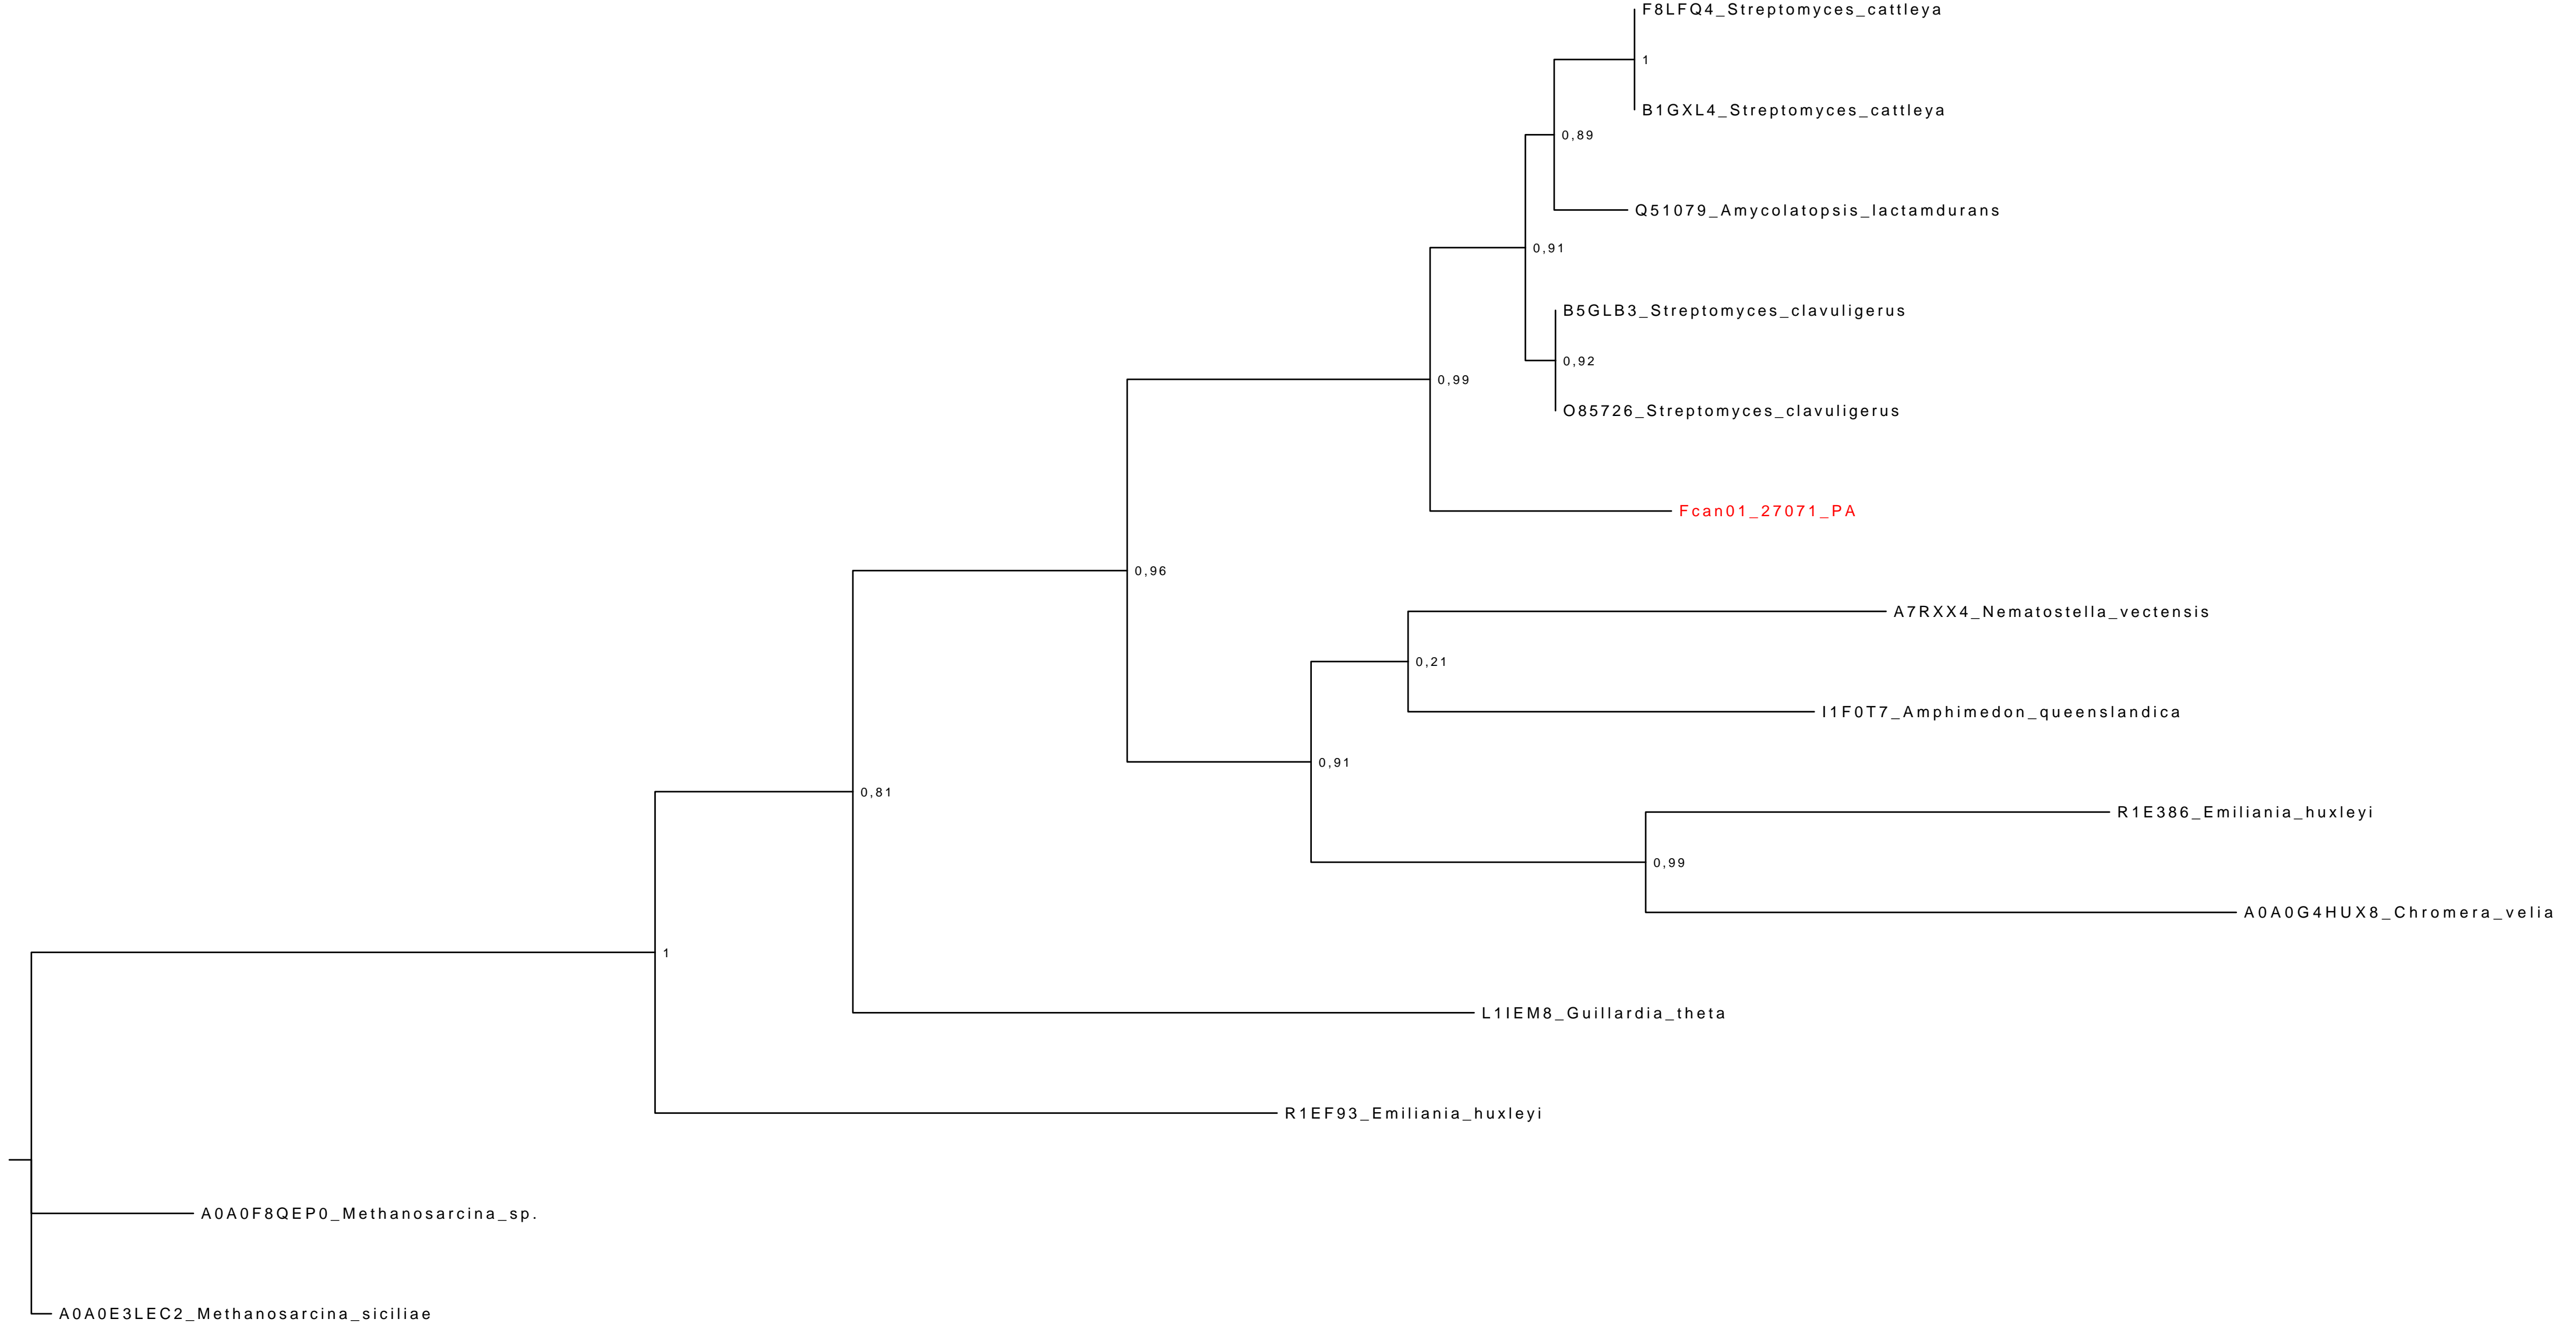



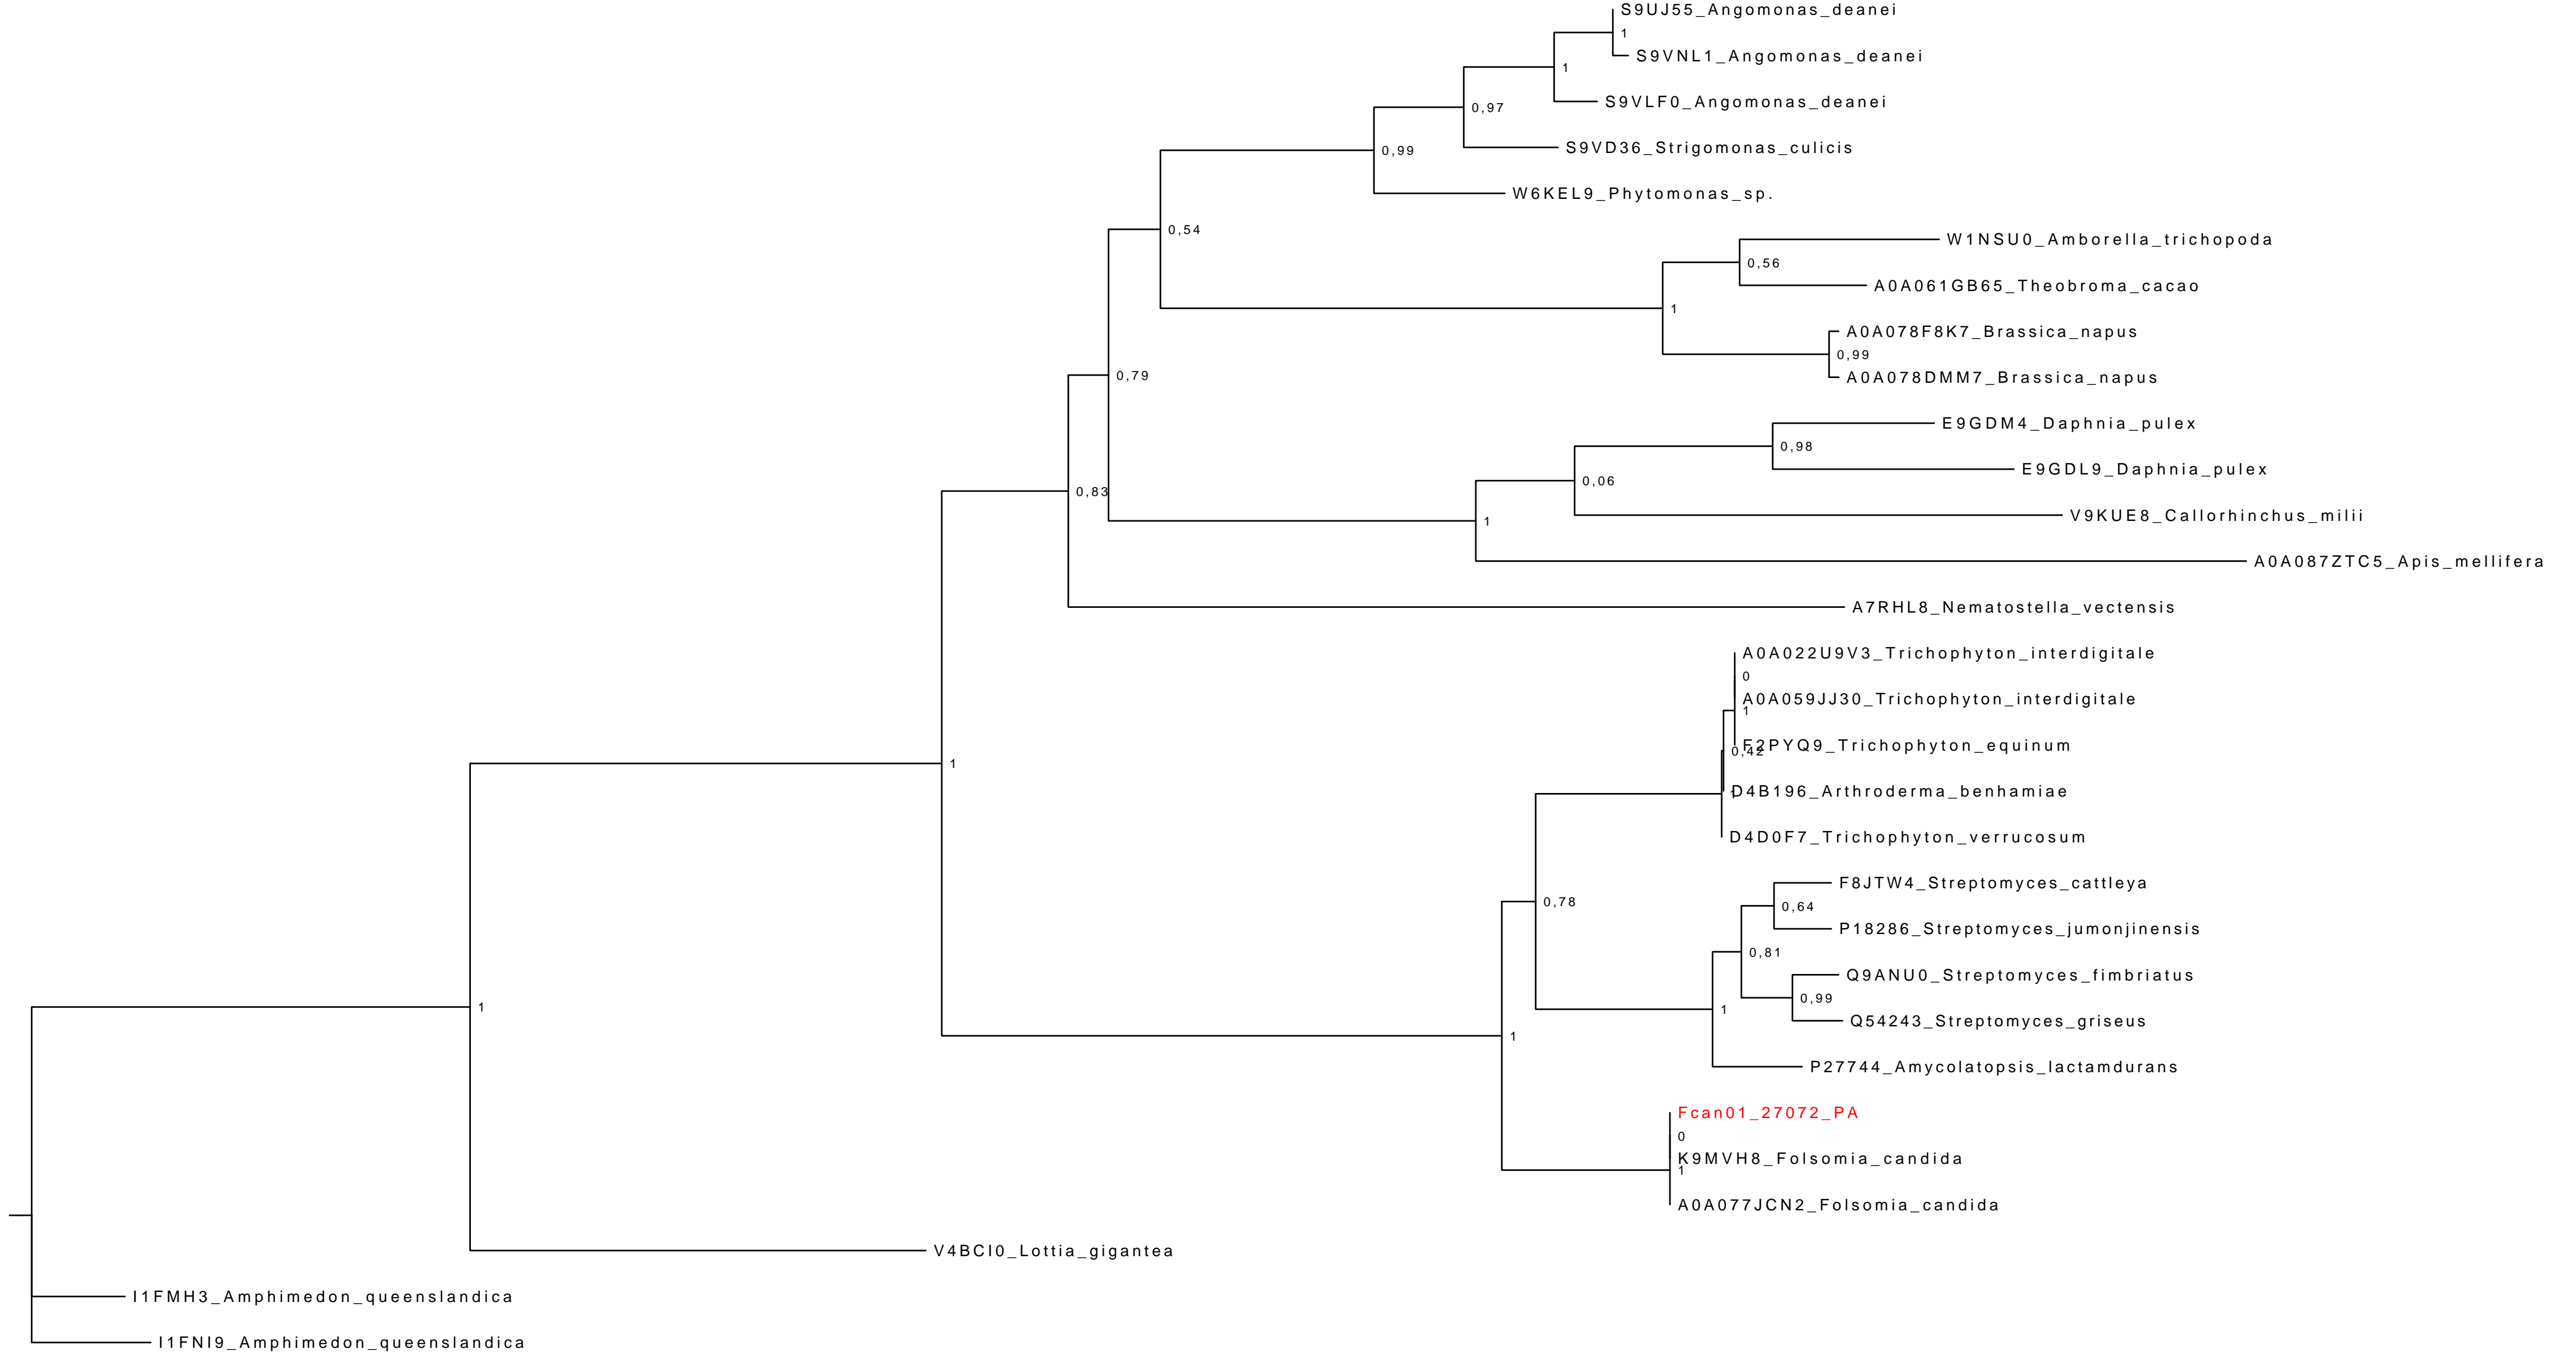

0.4

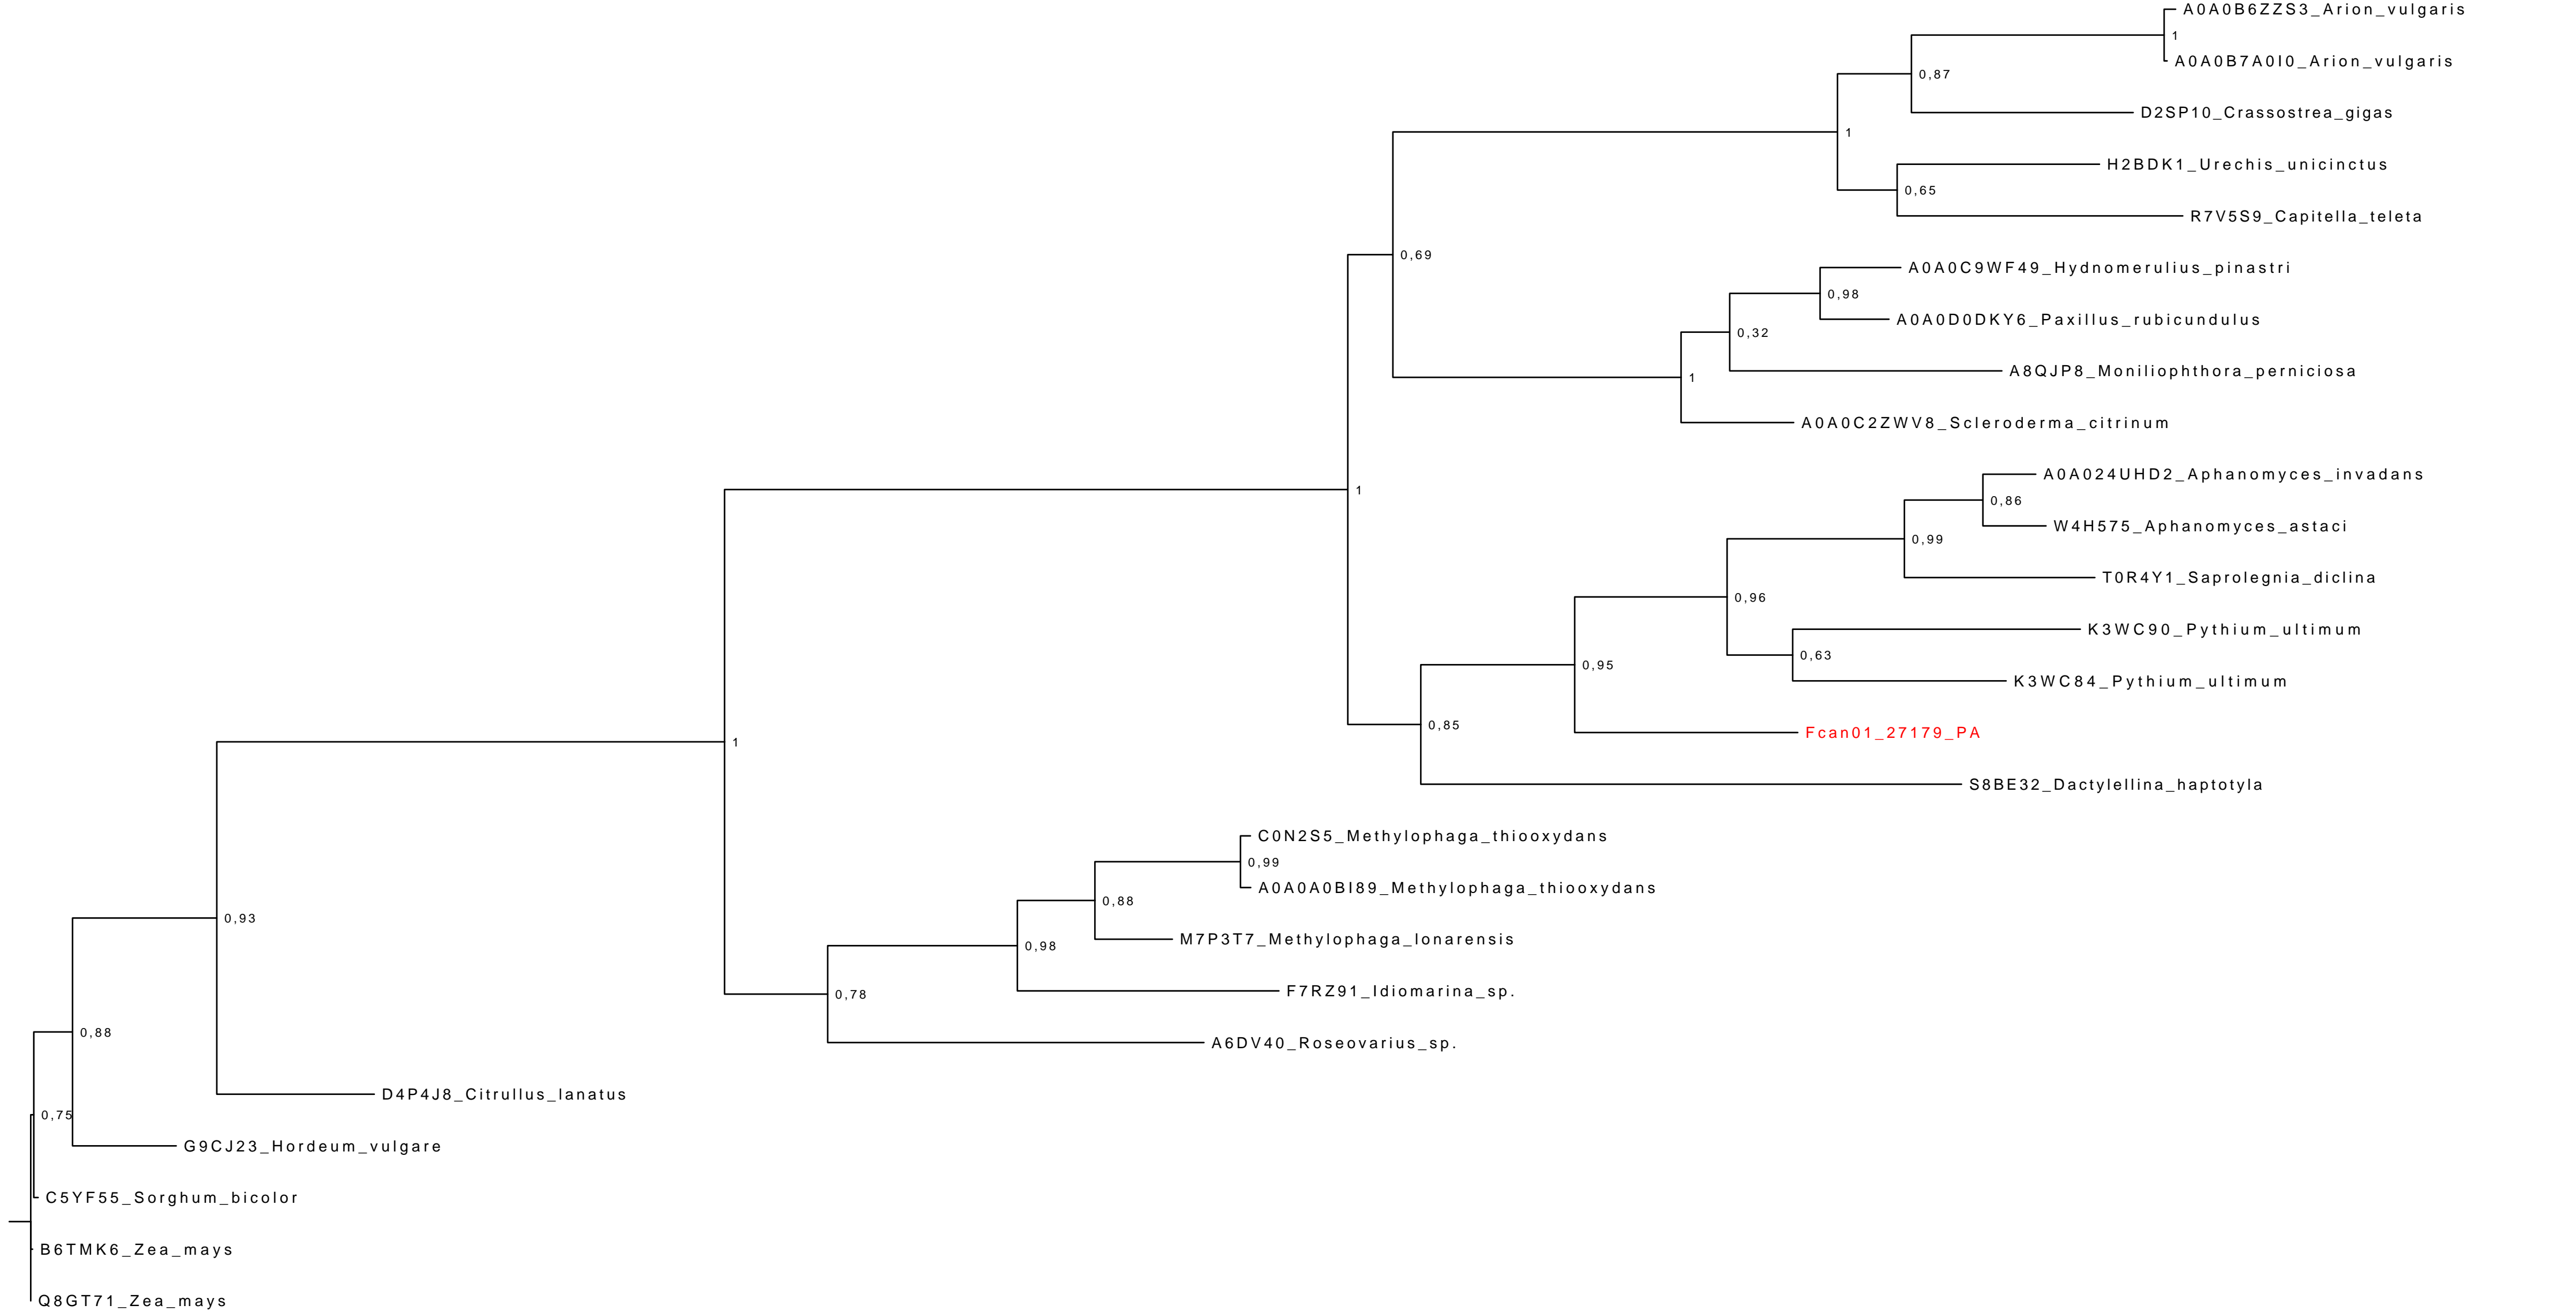

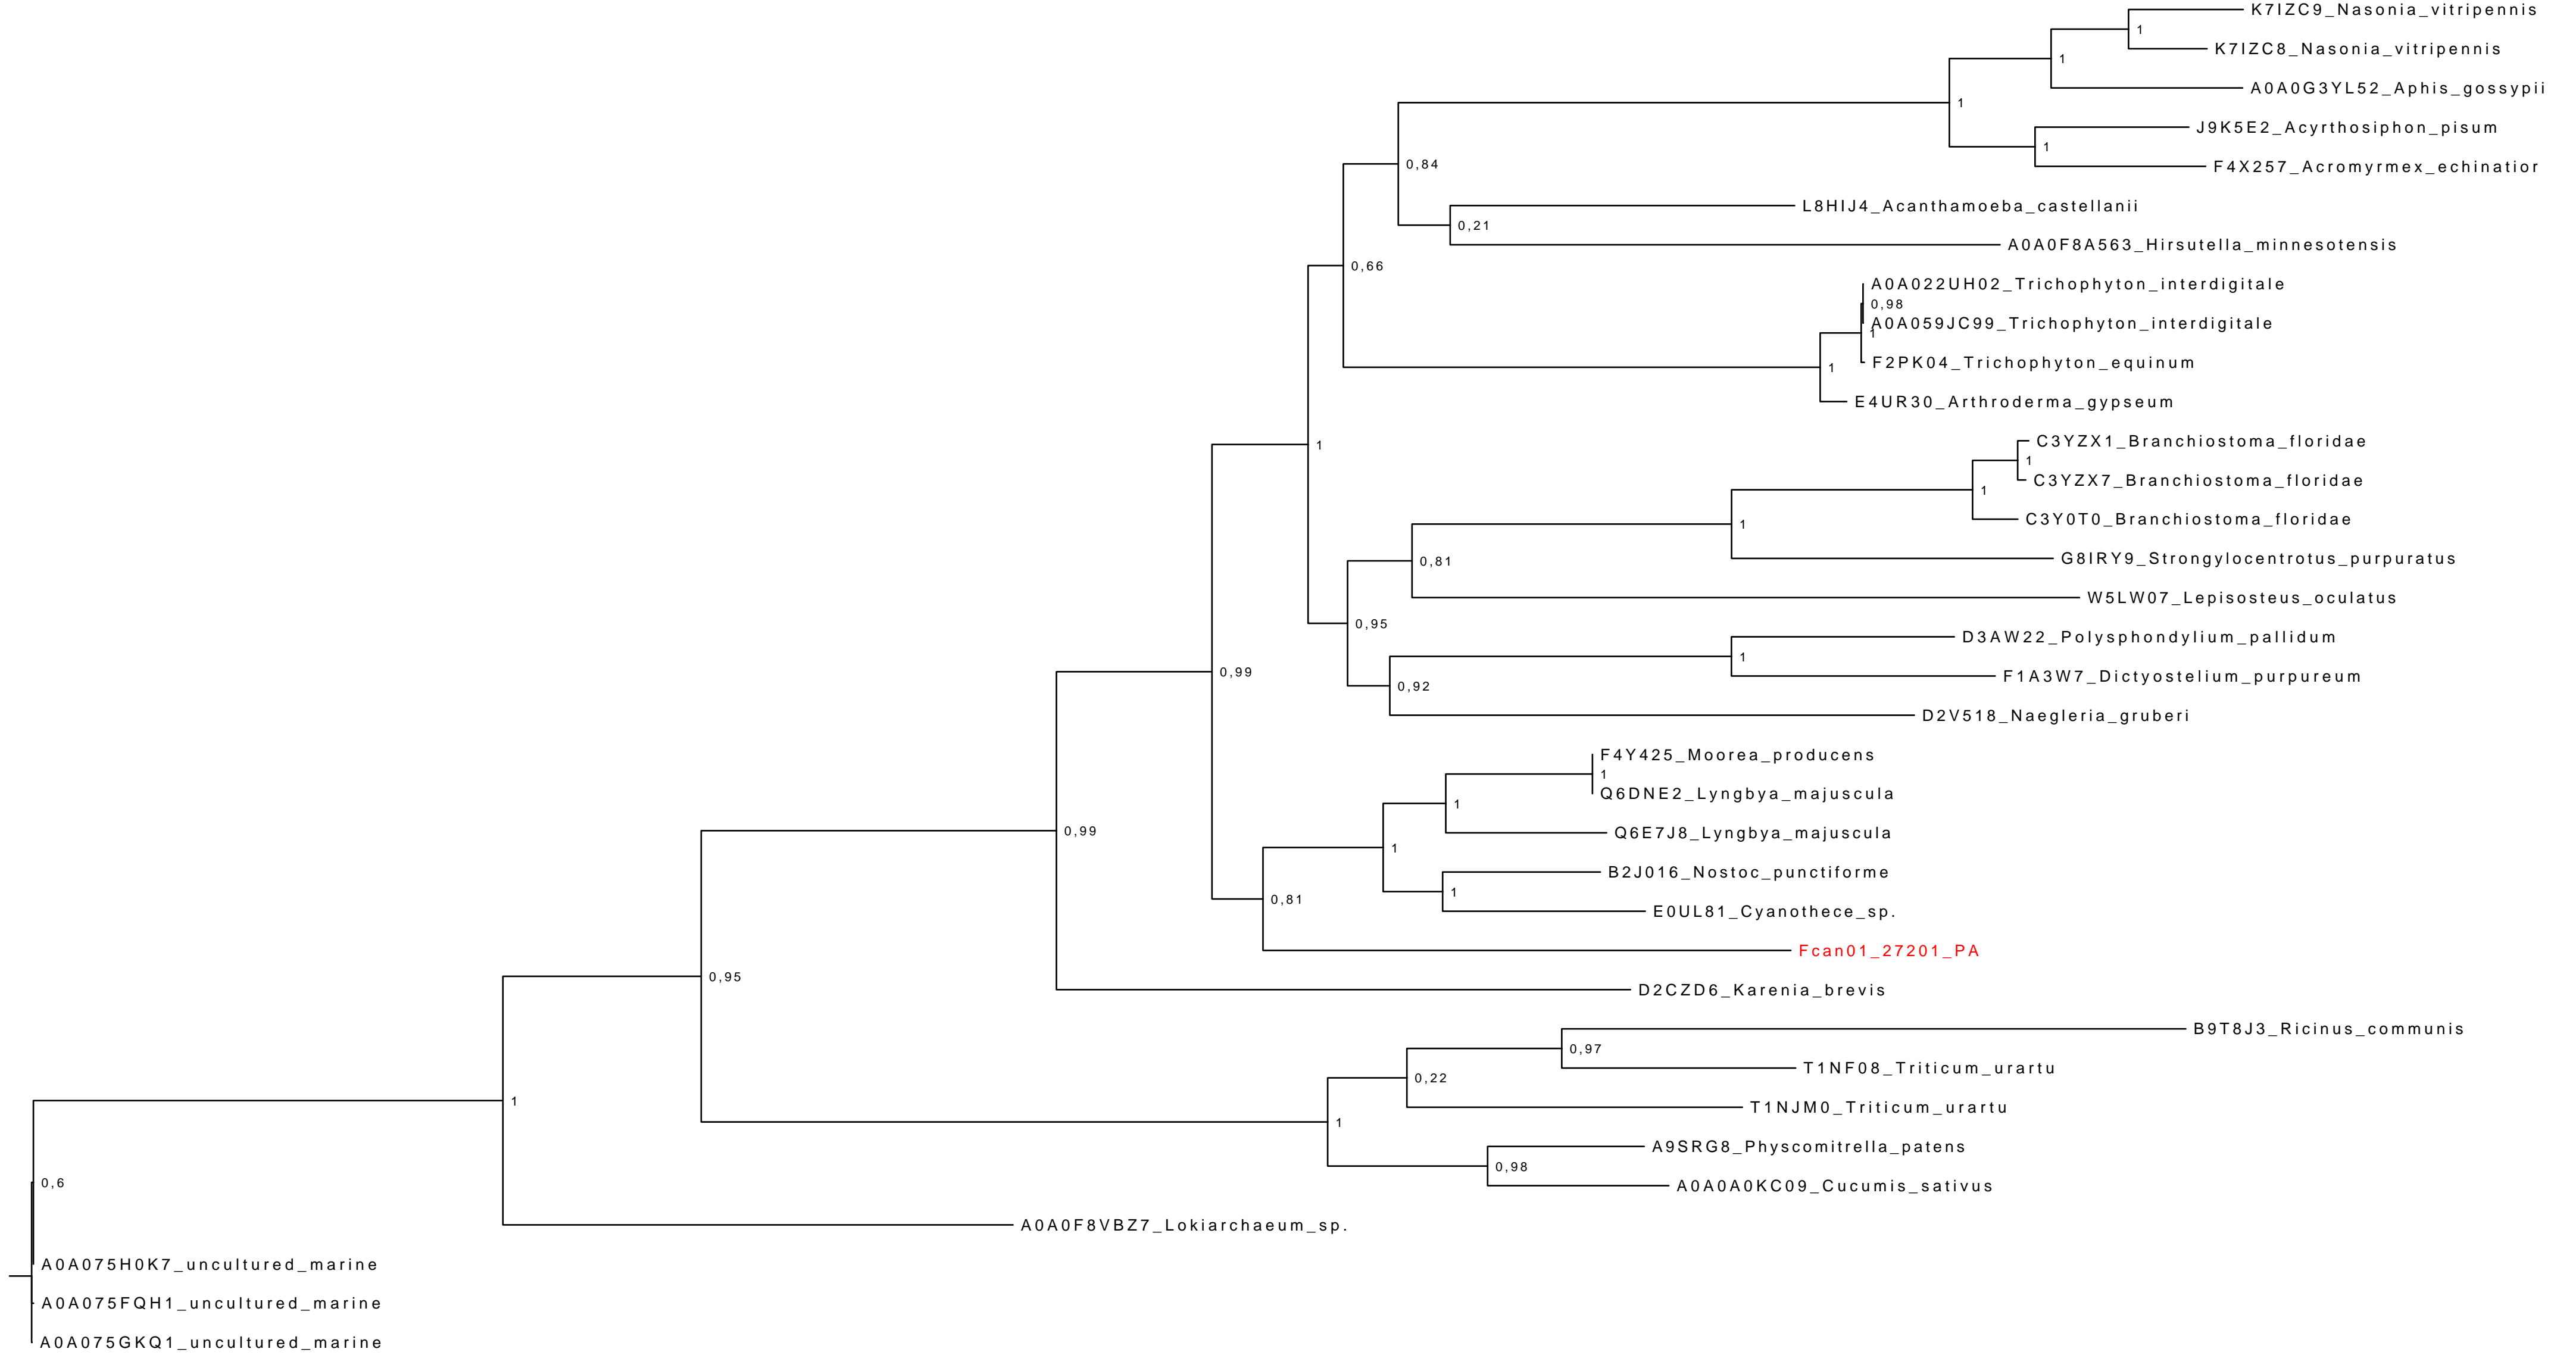

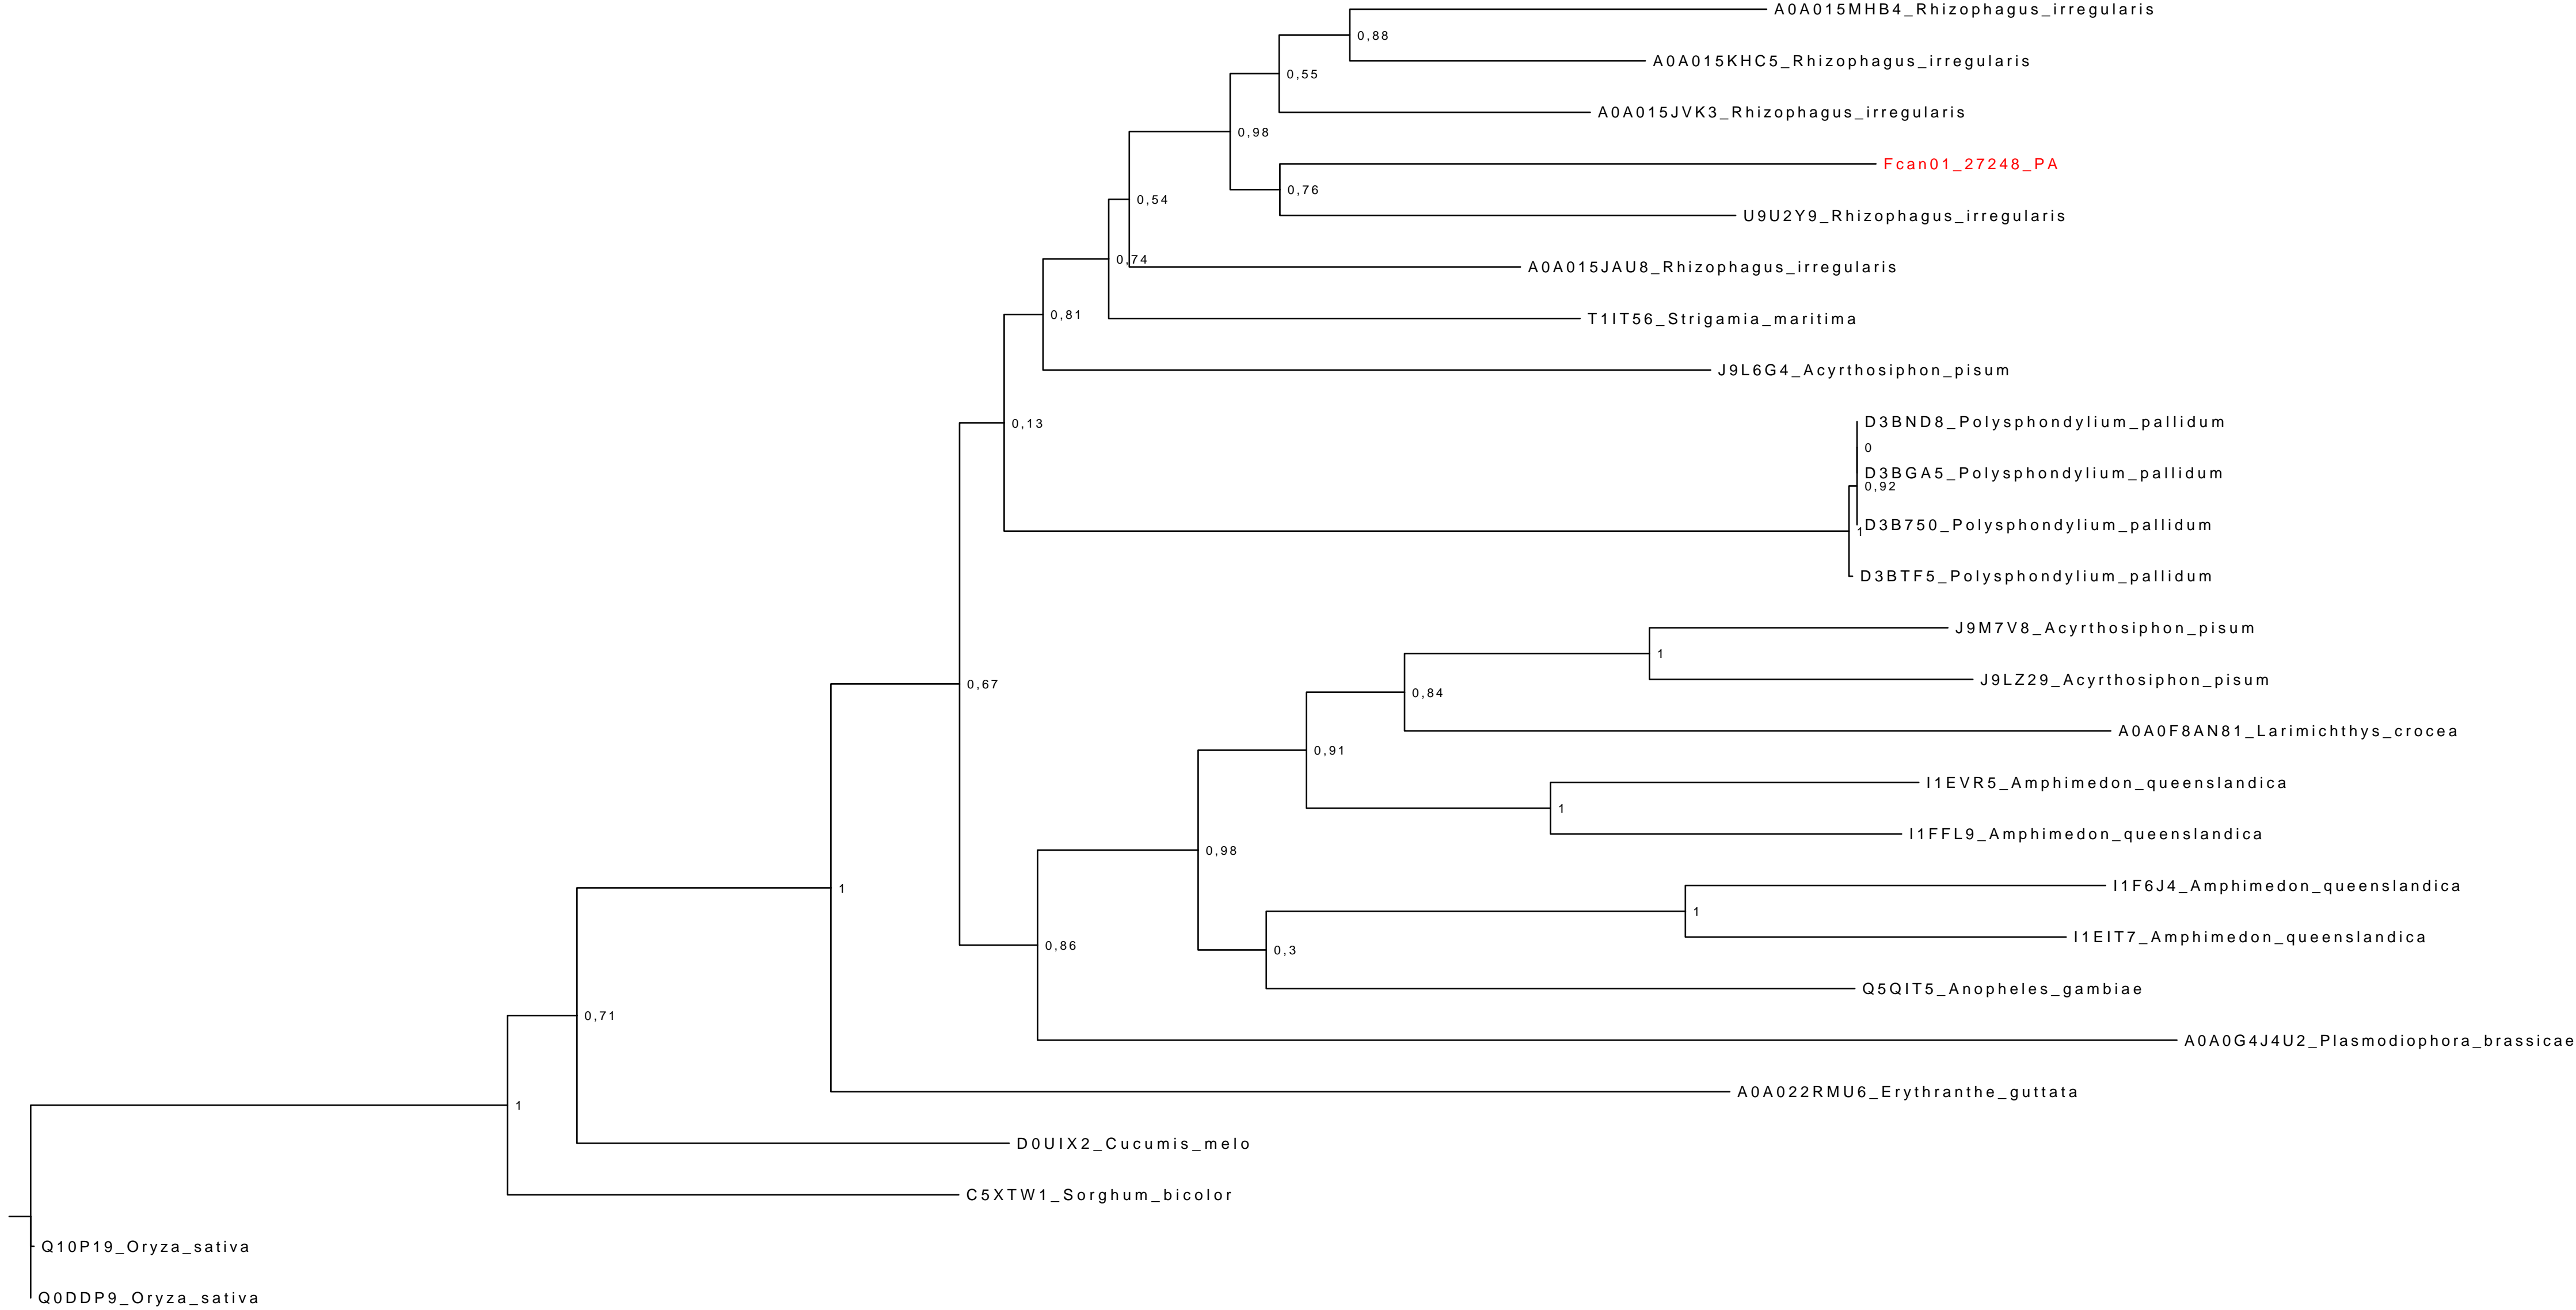

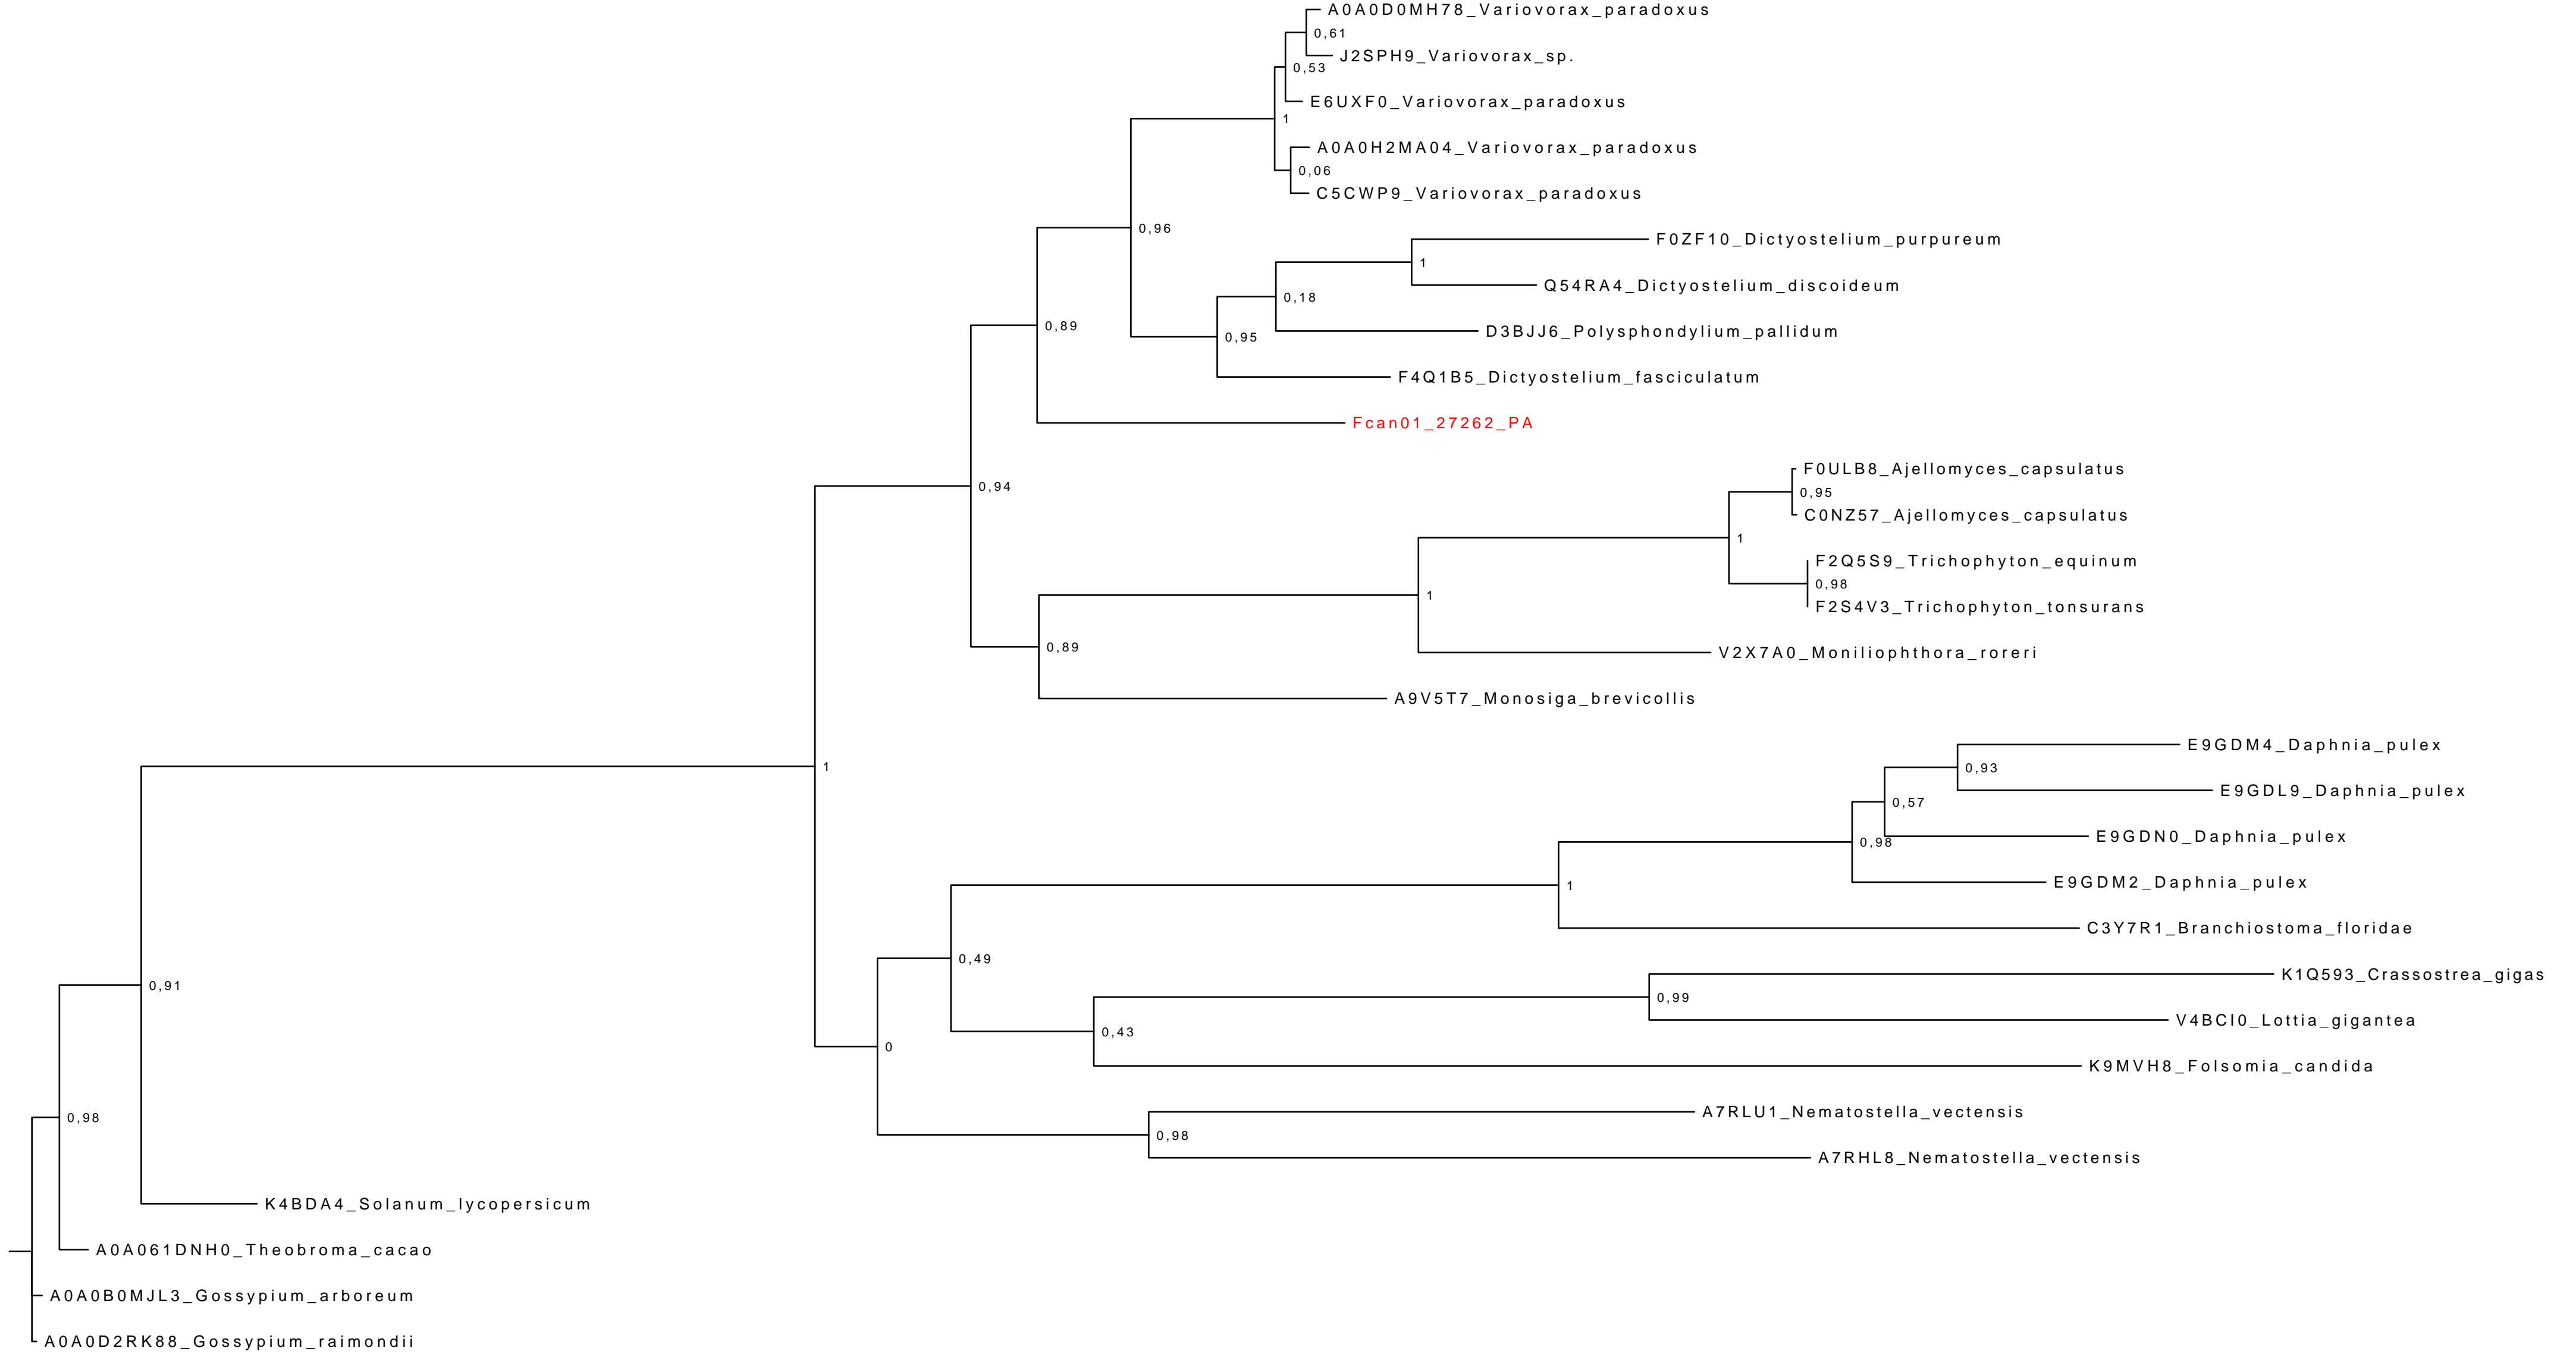

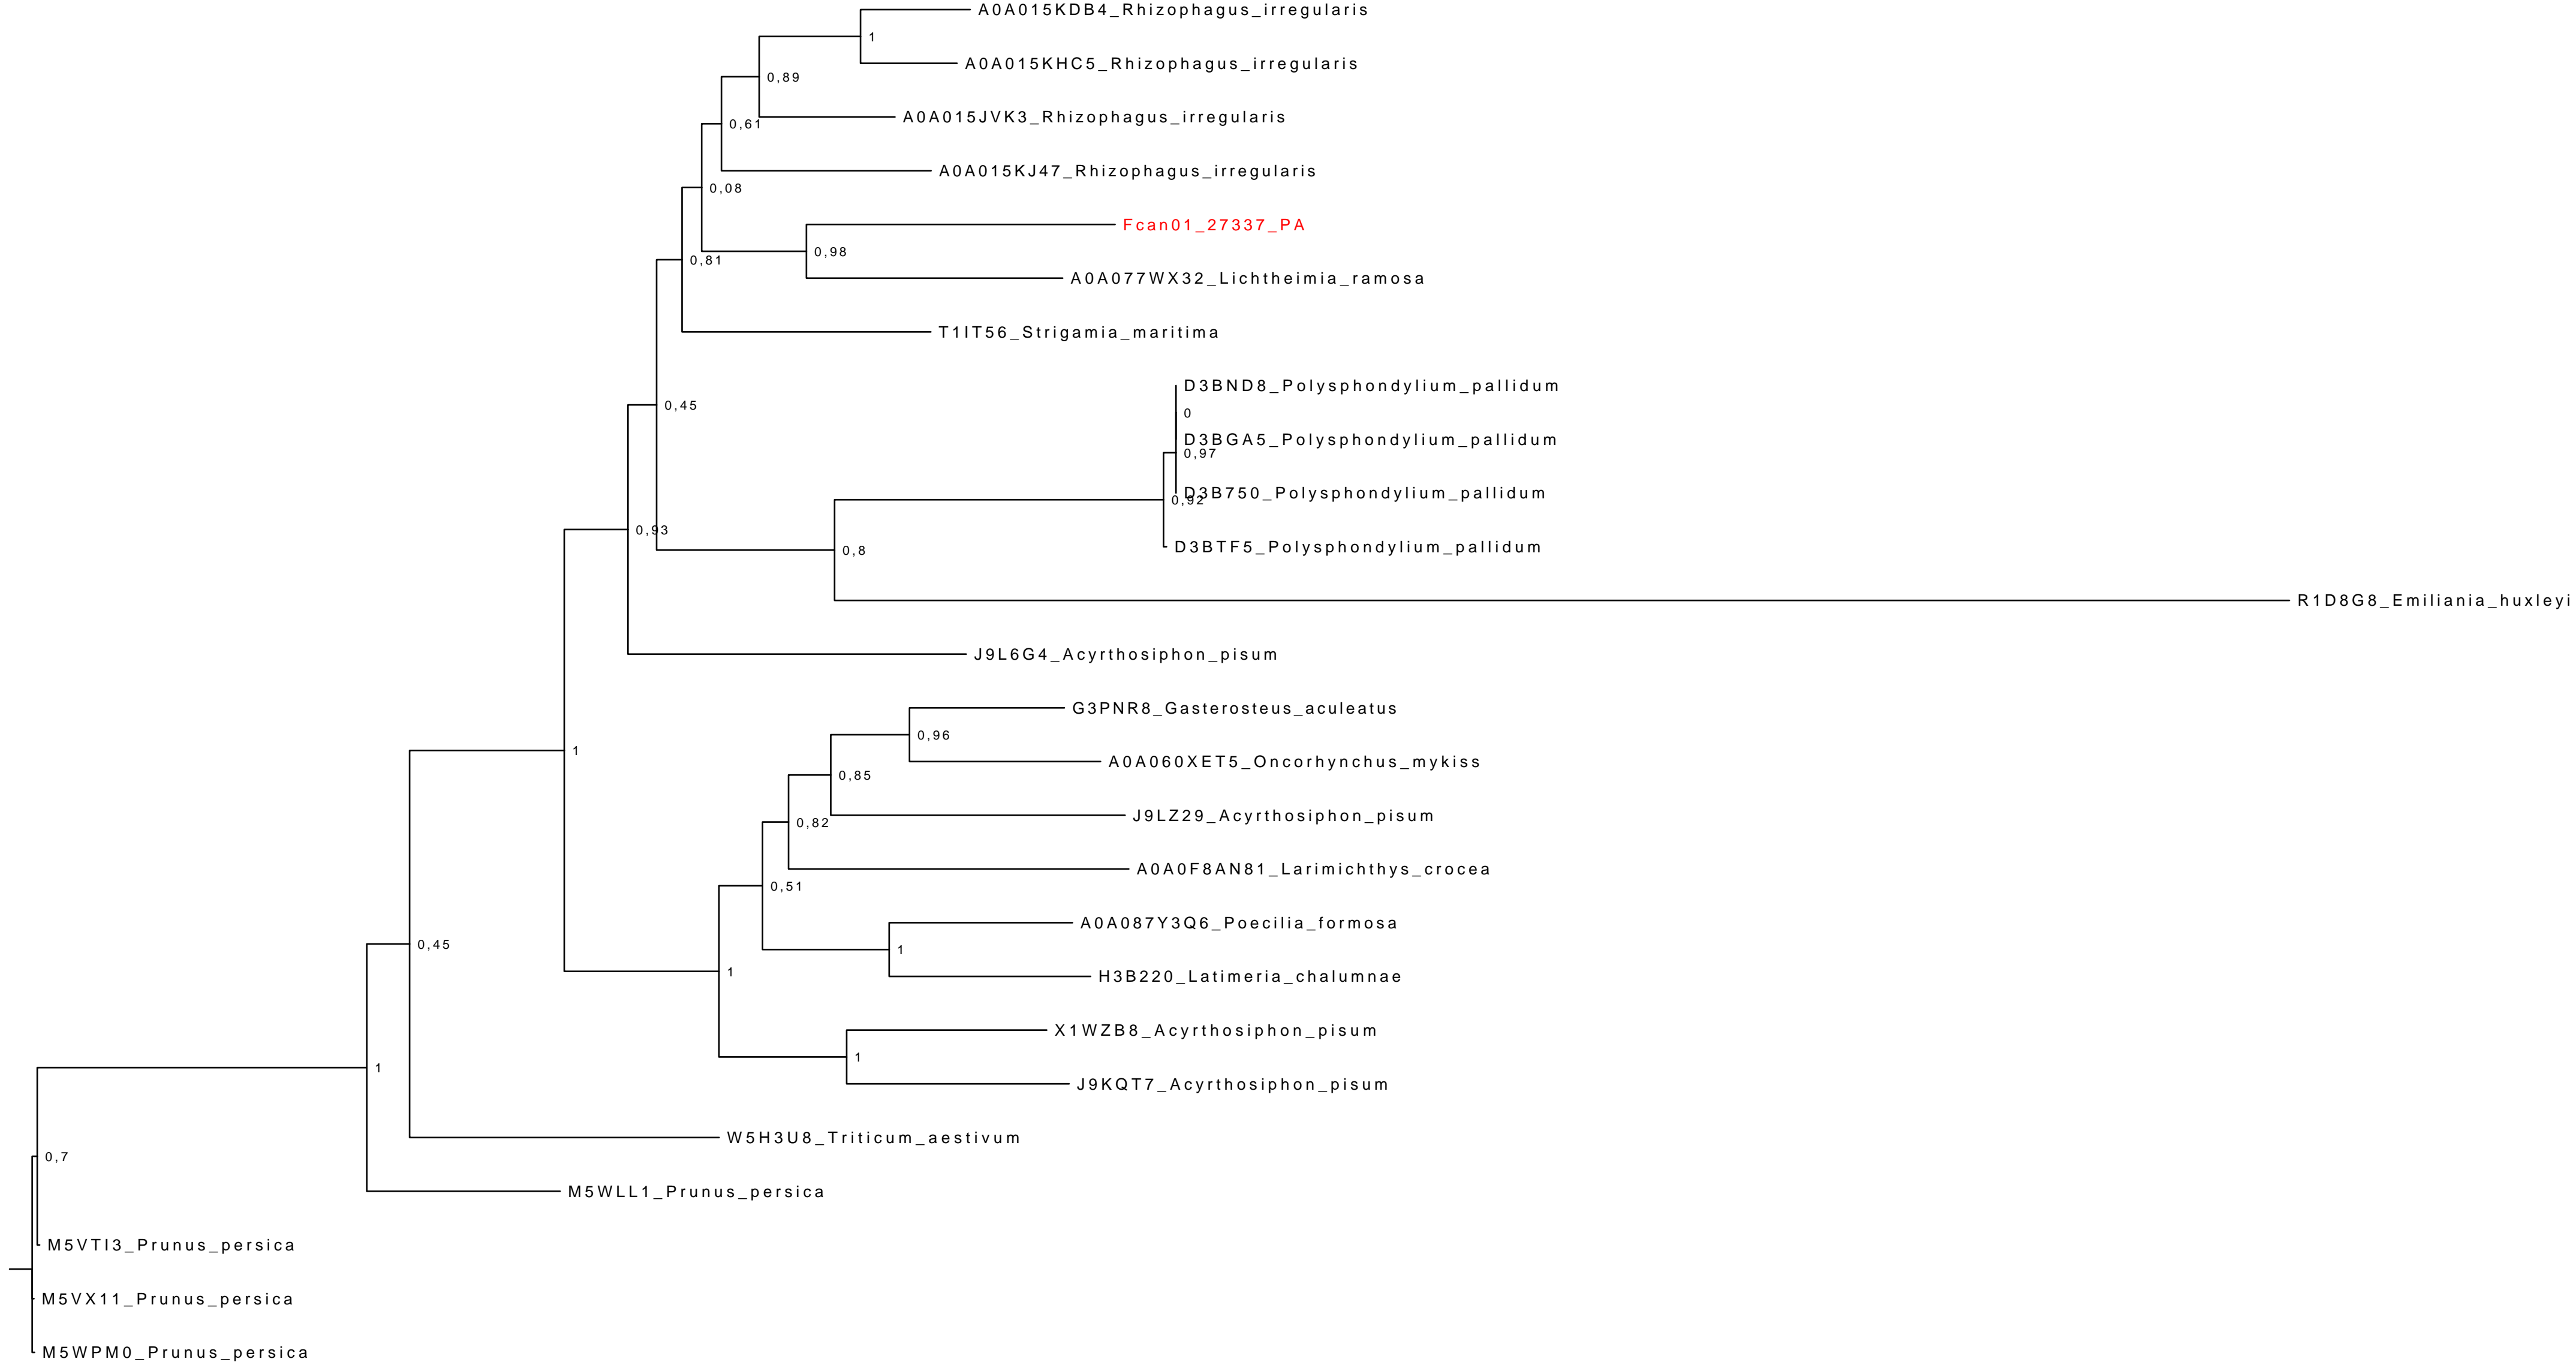

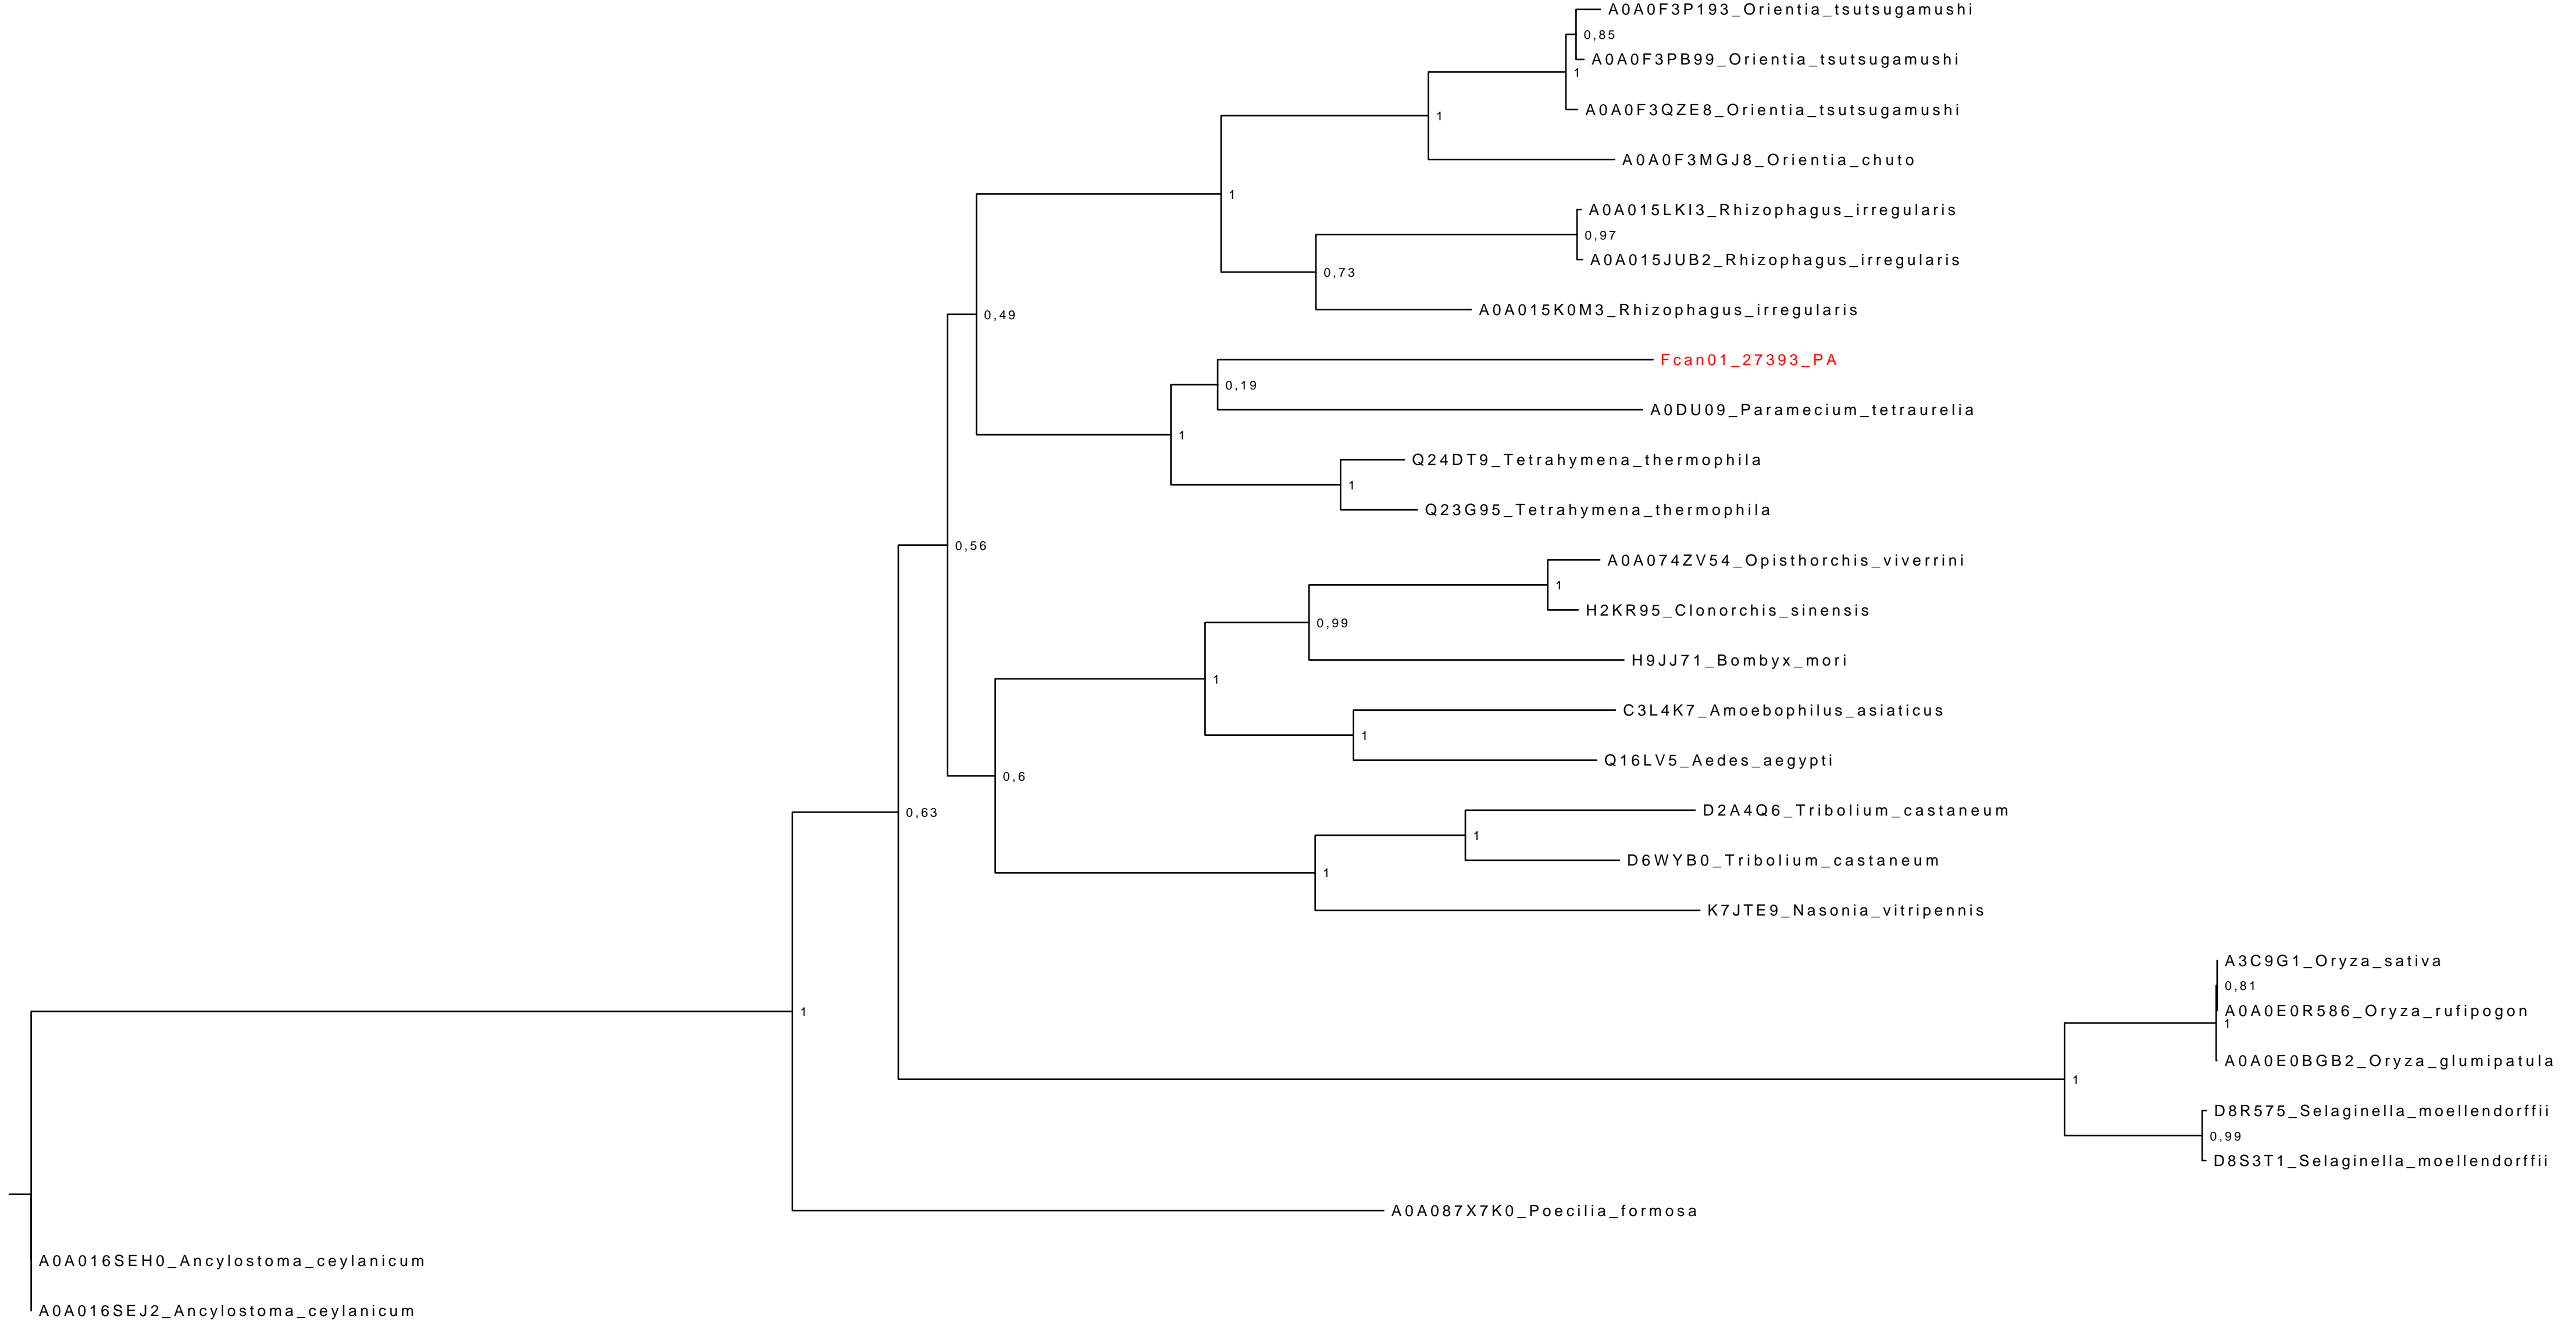

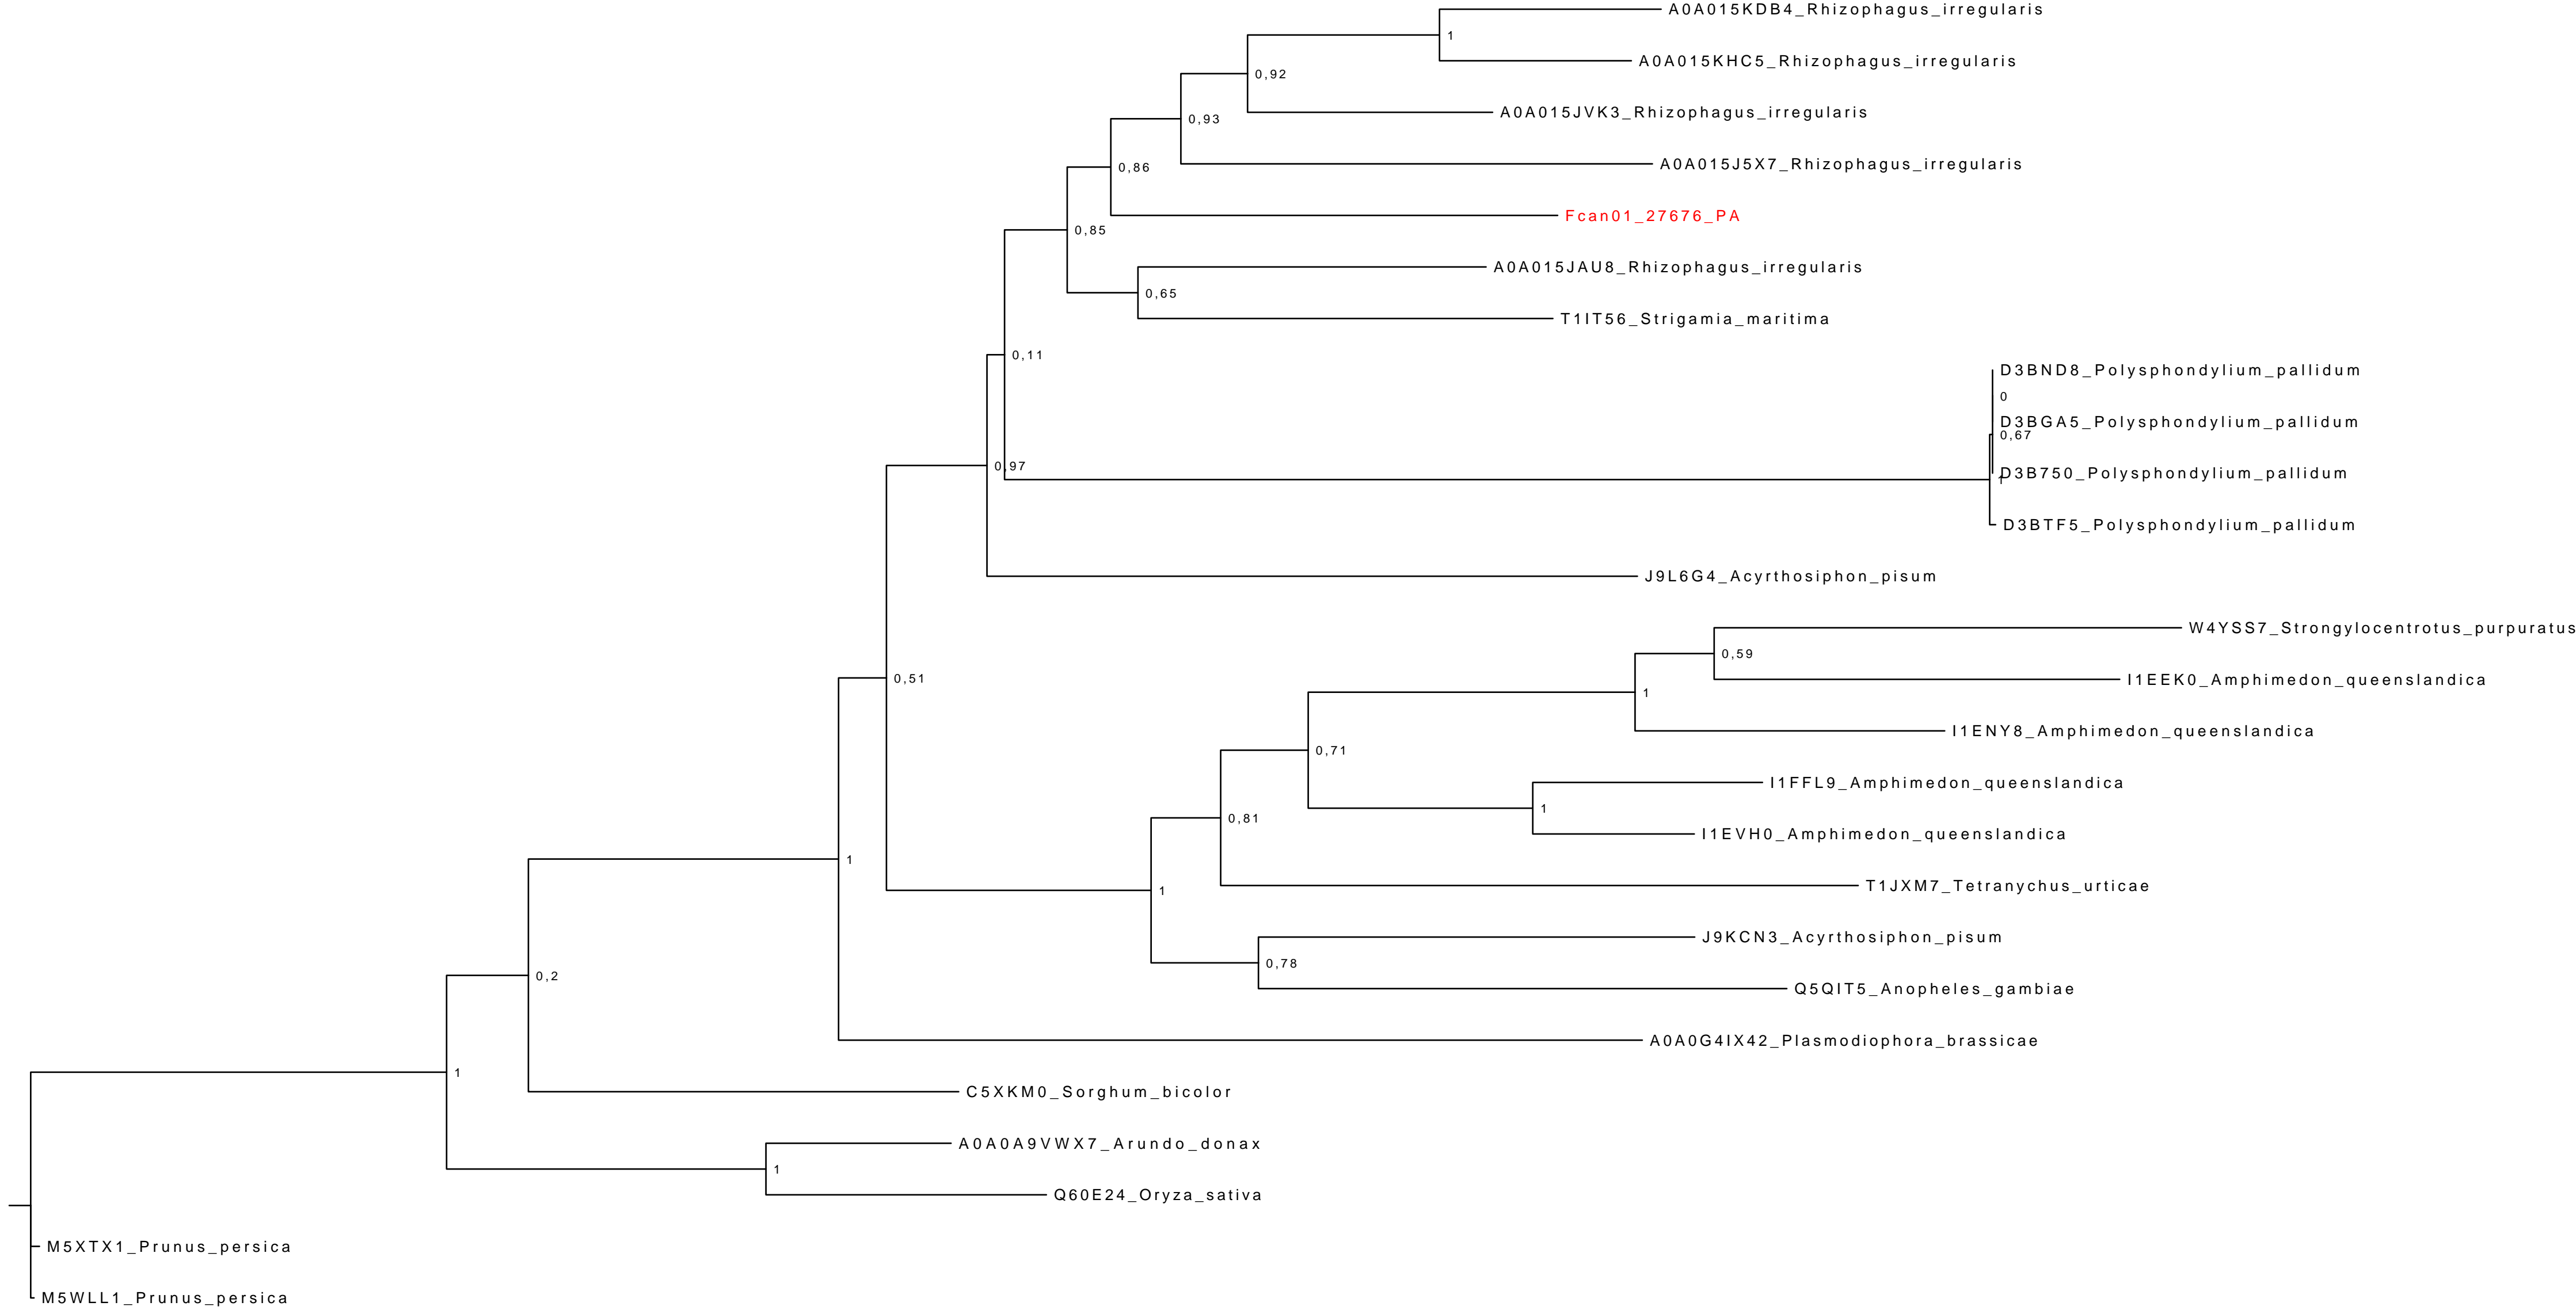

0.5



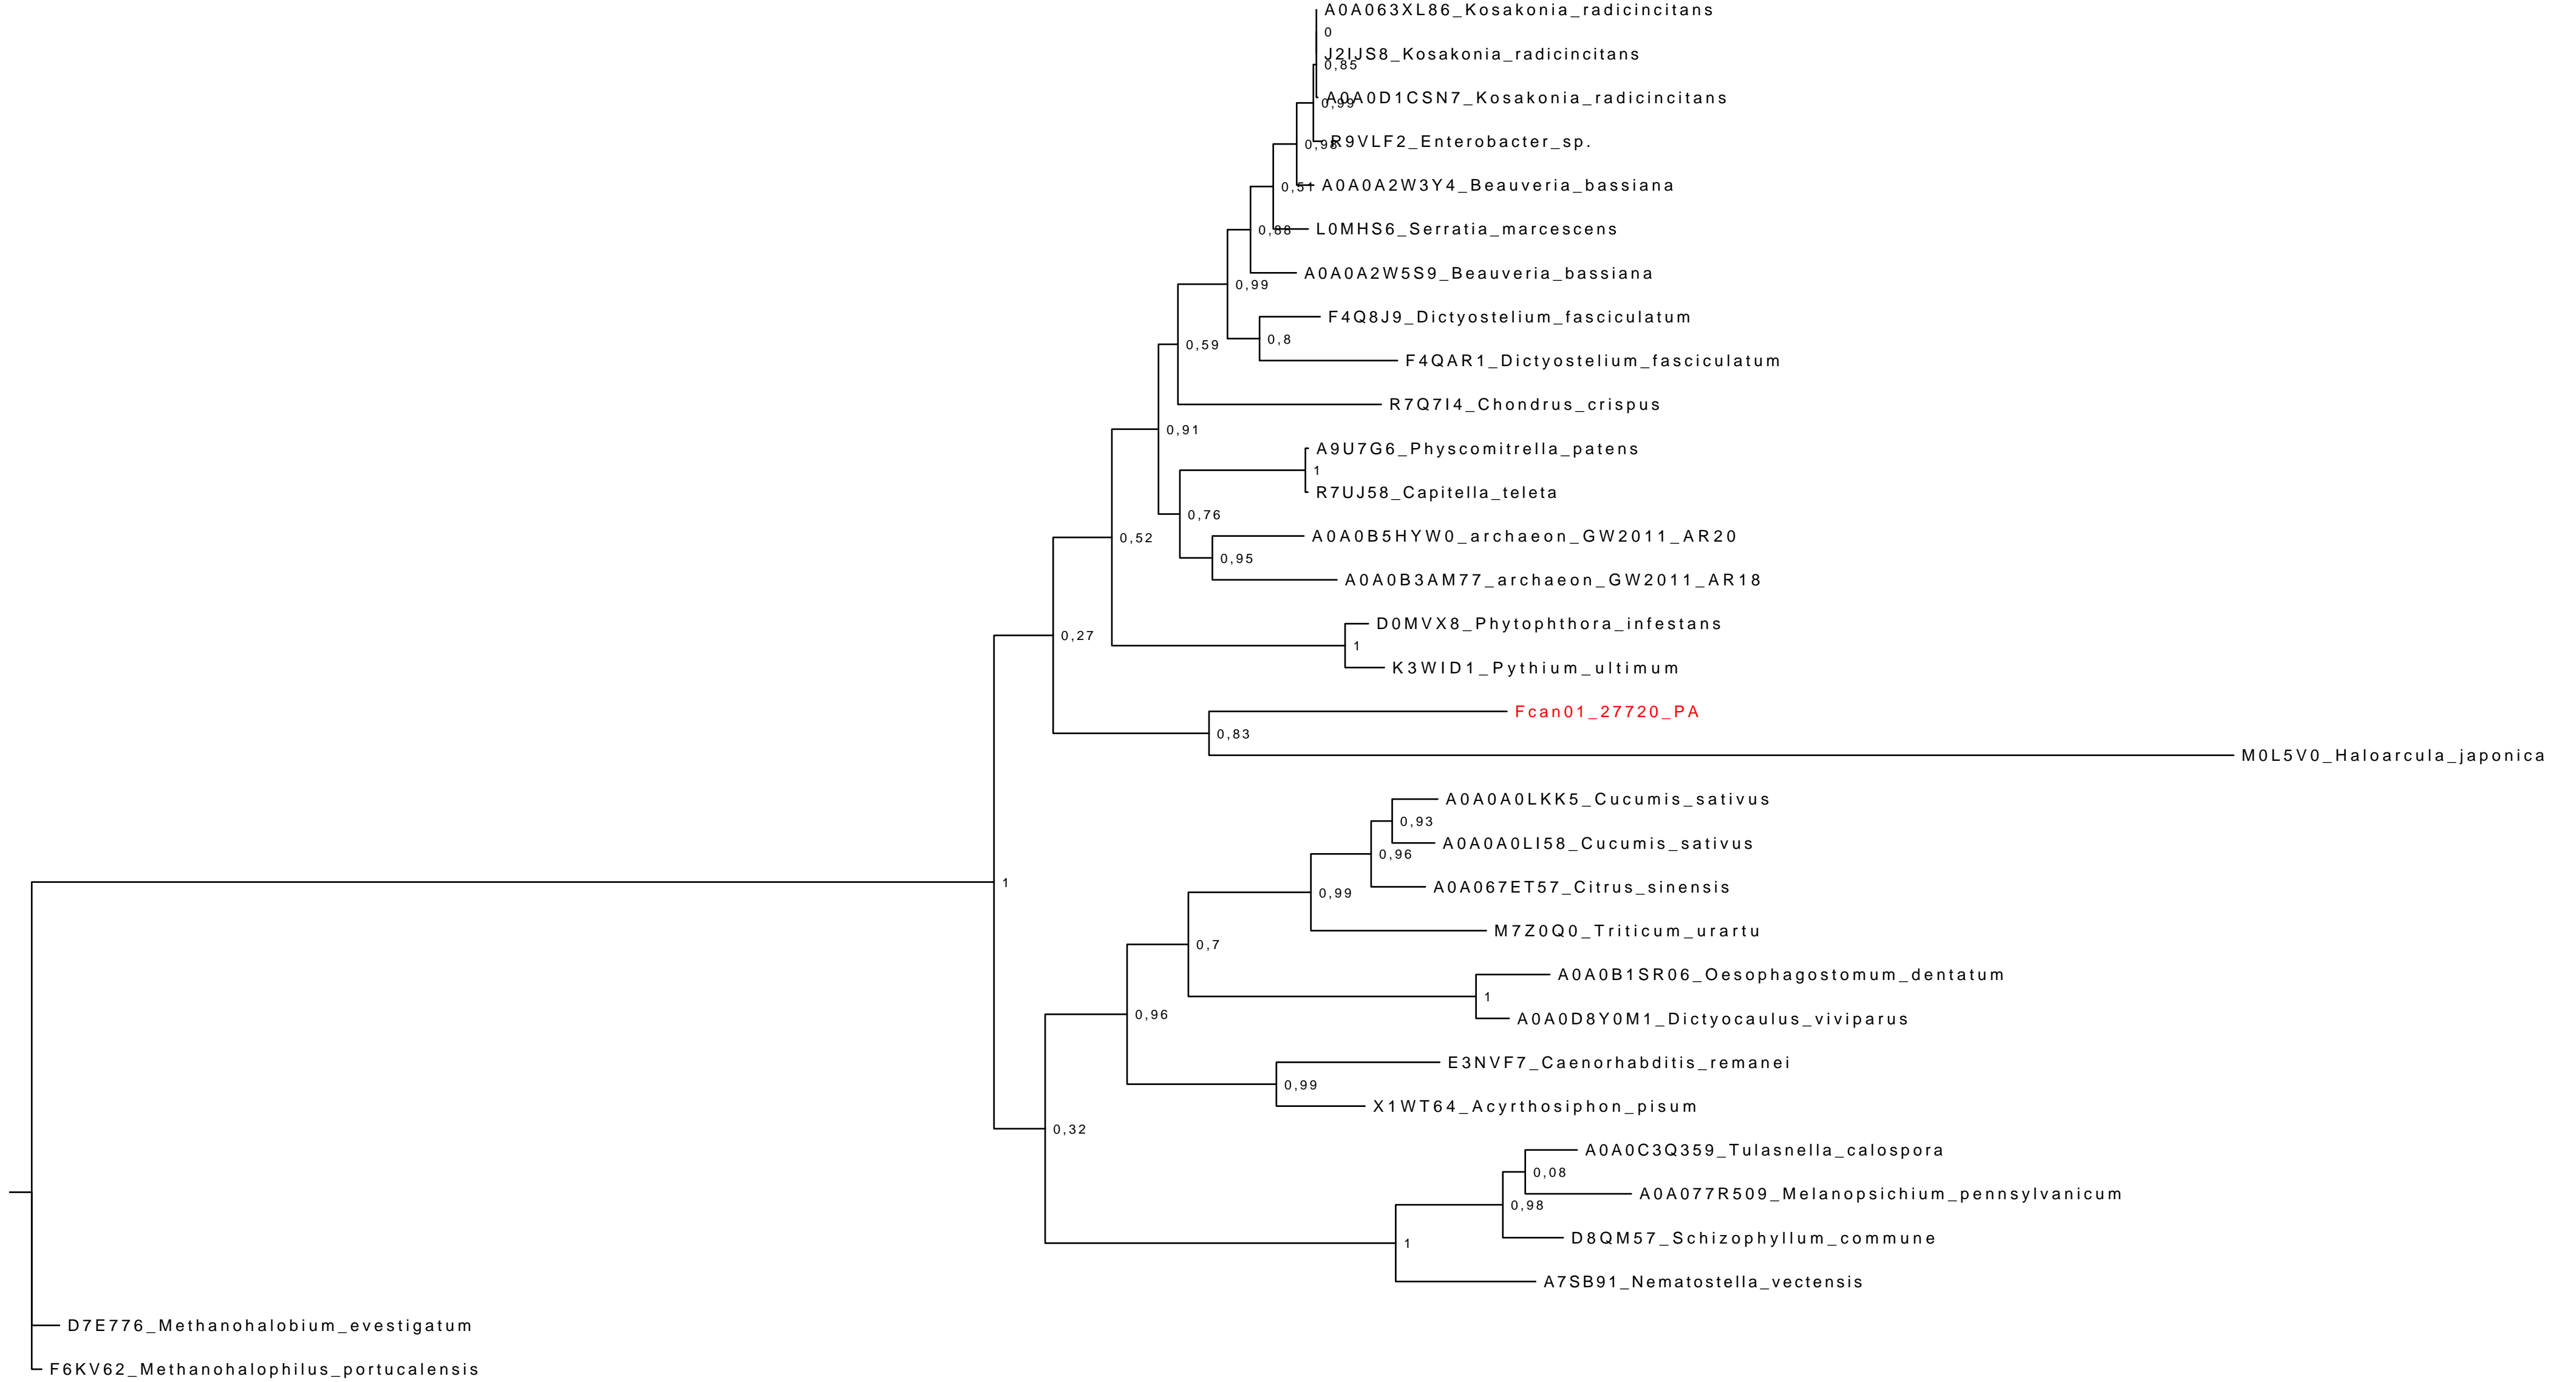

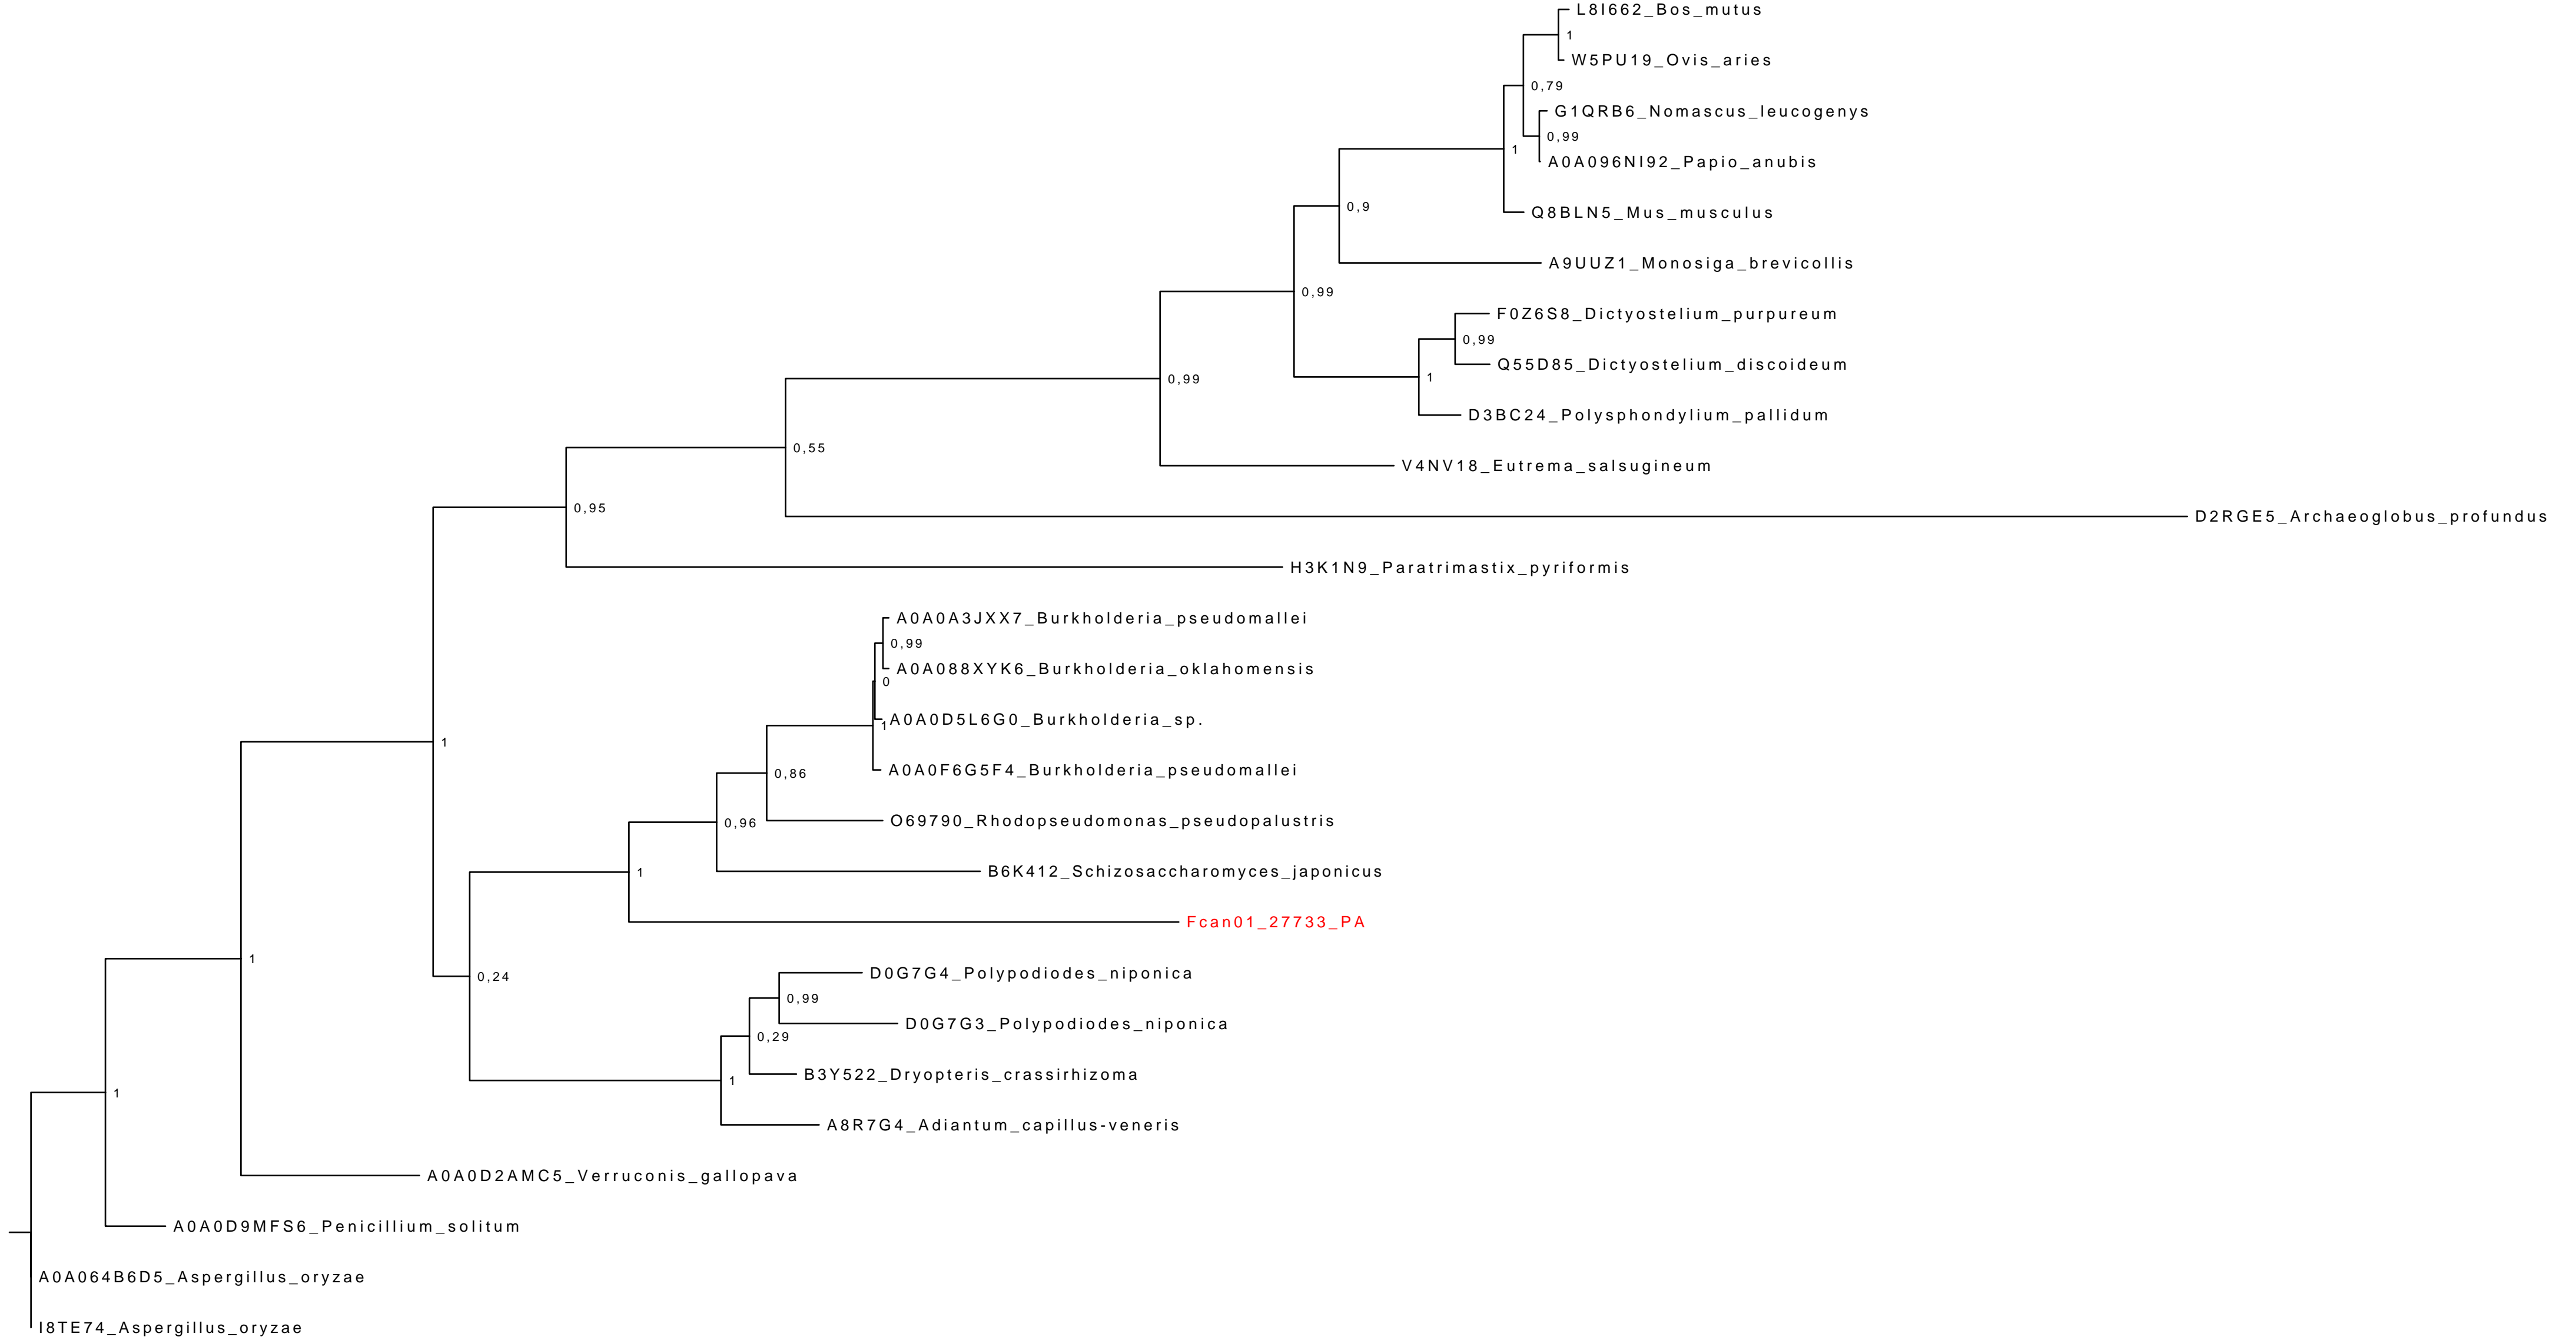

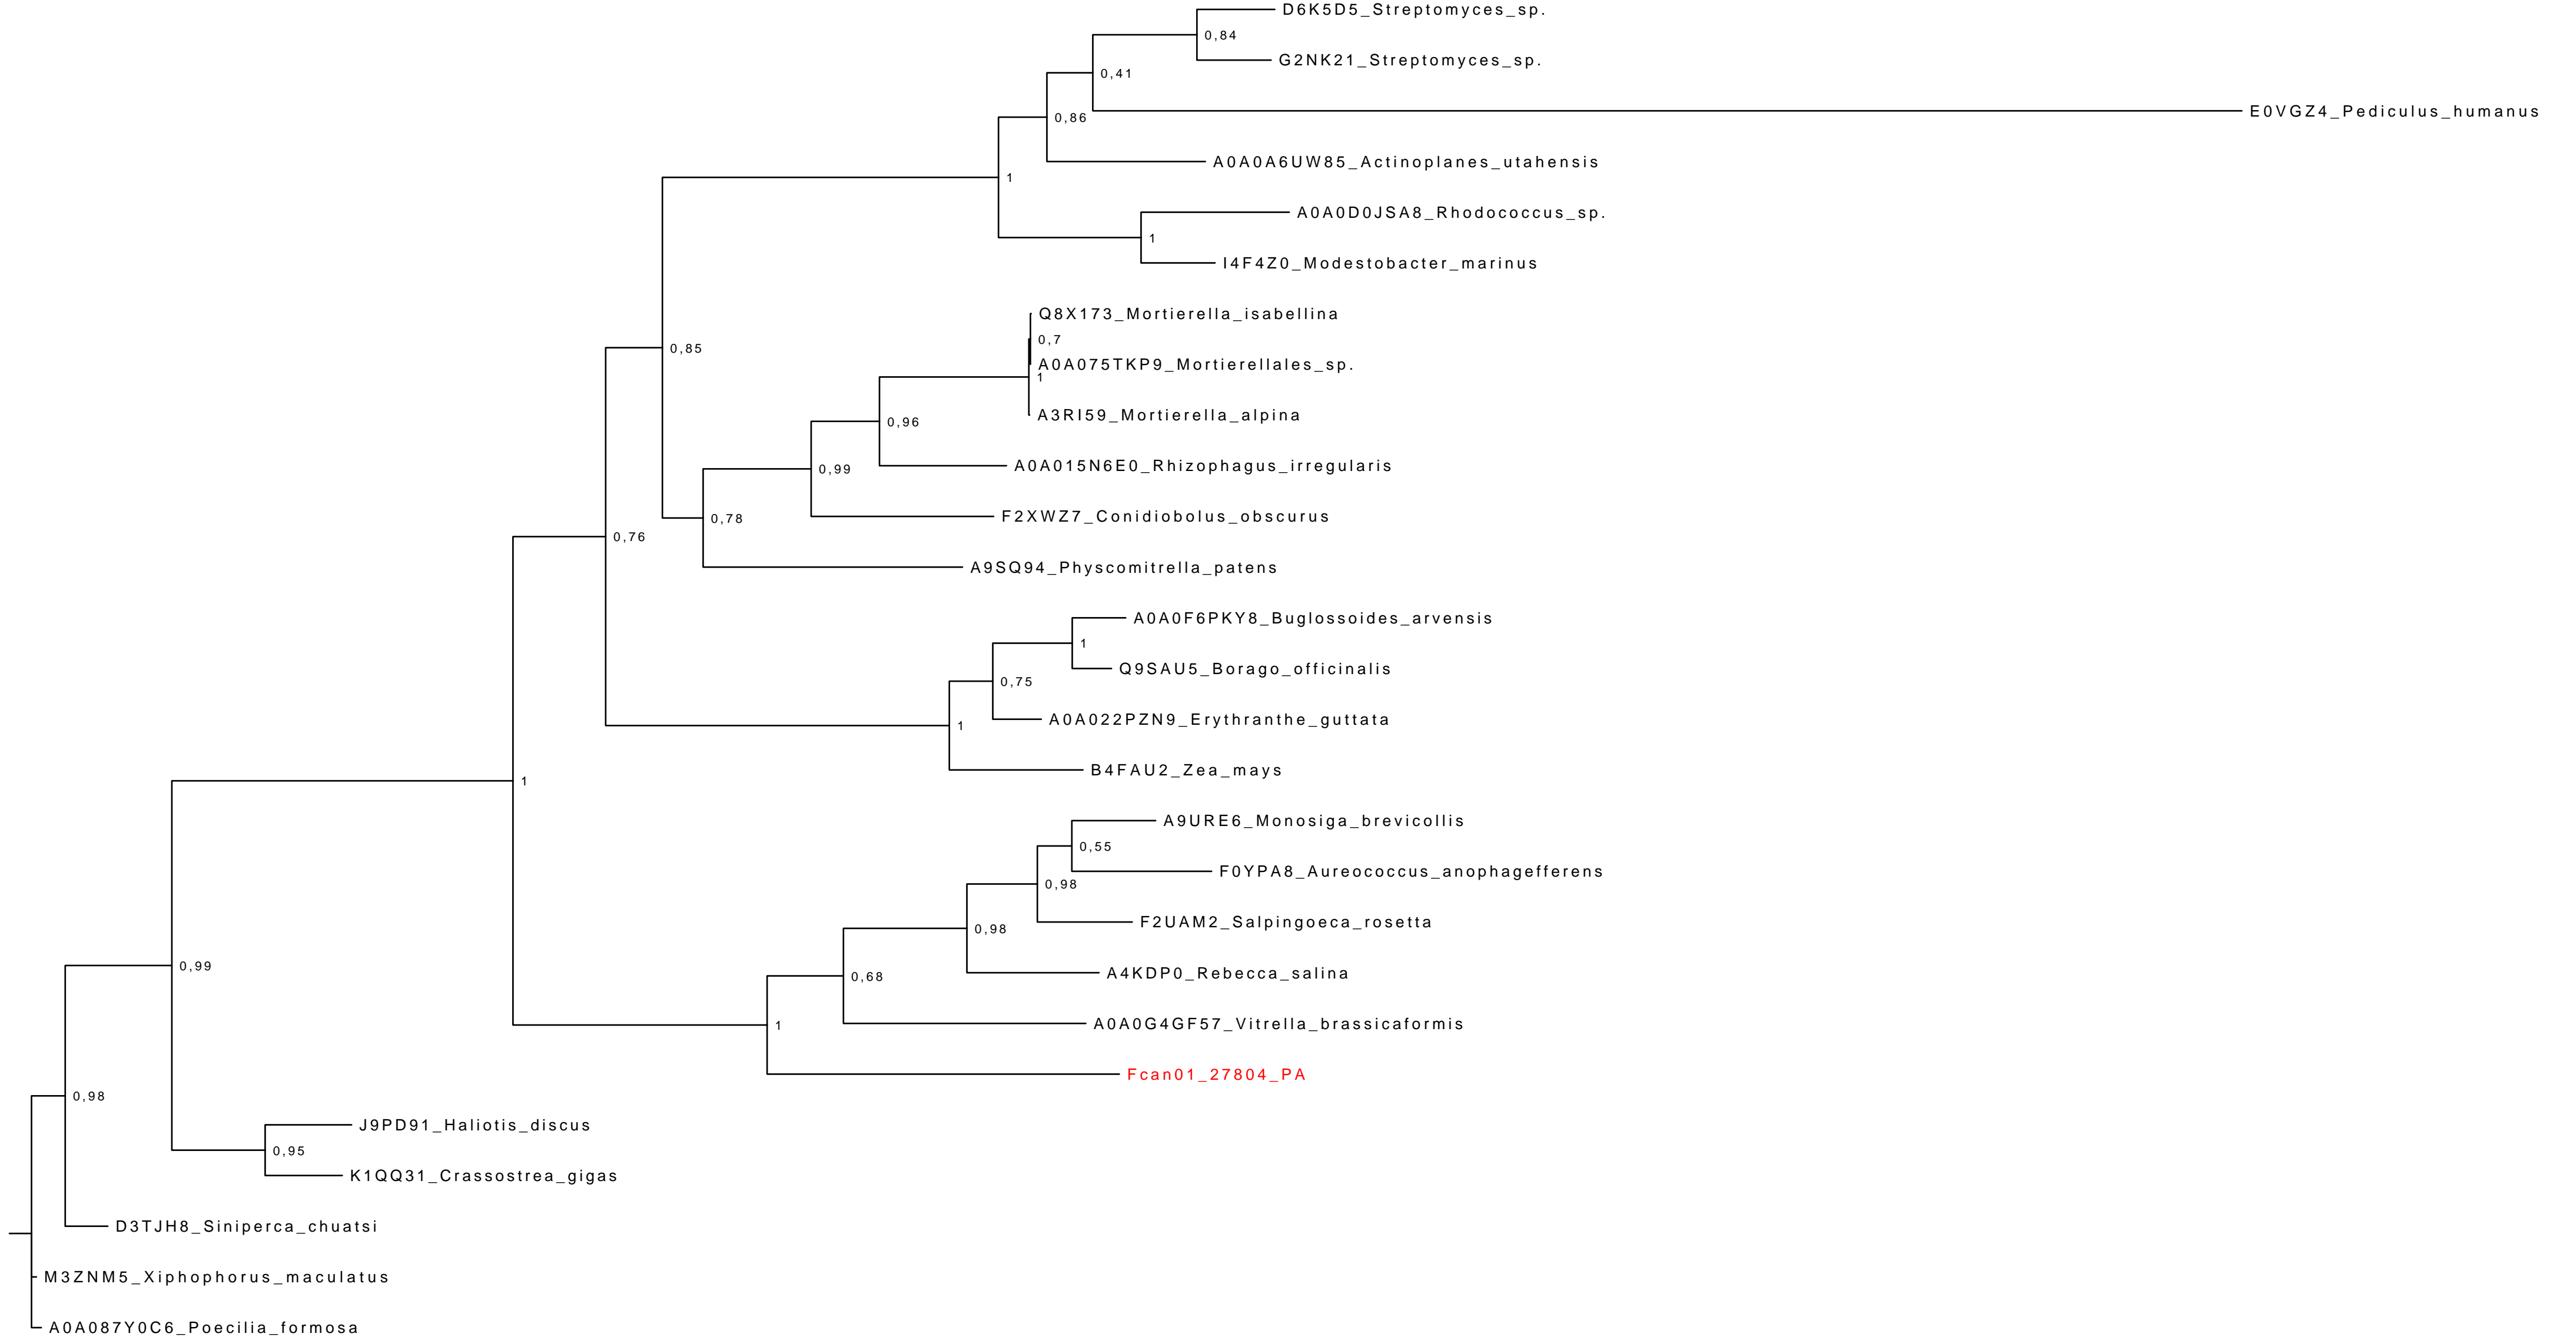

0.7

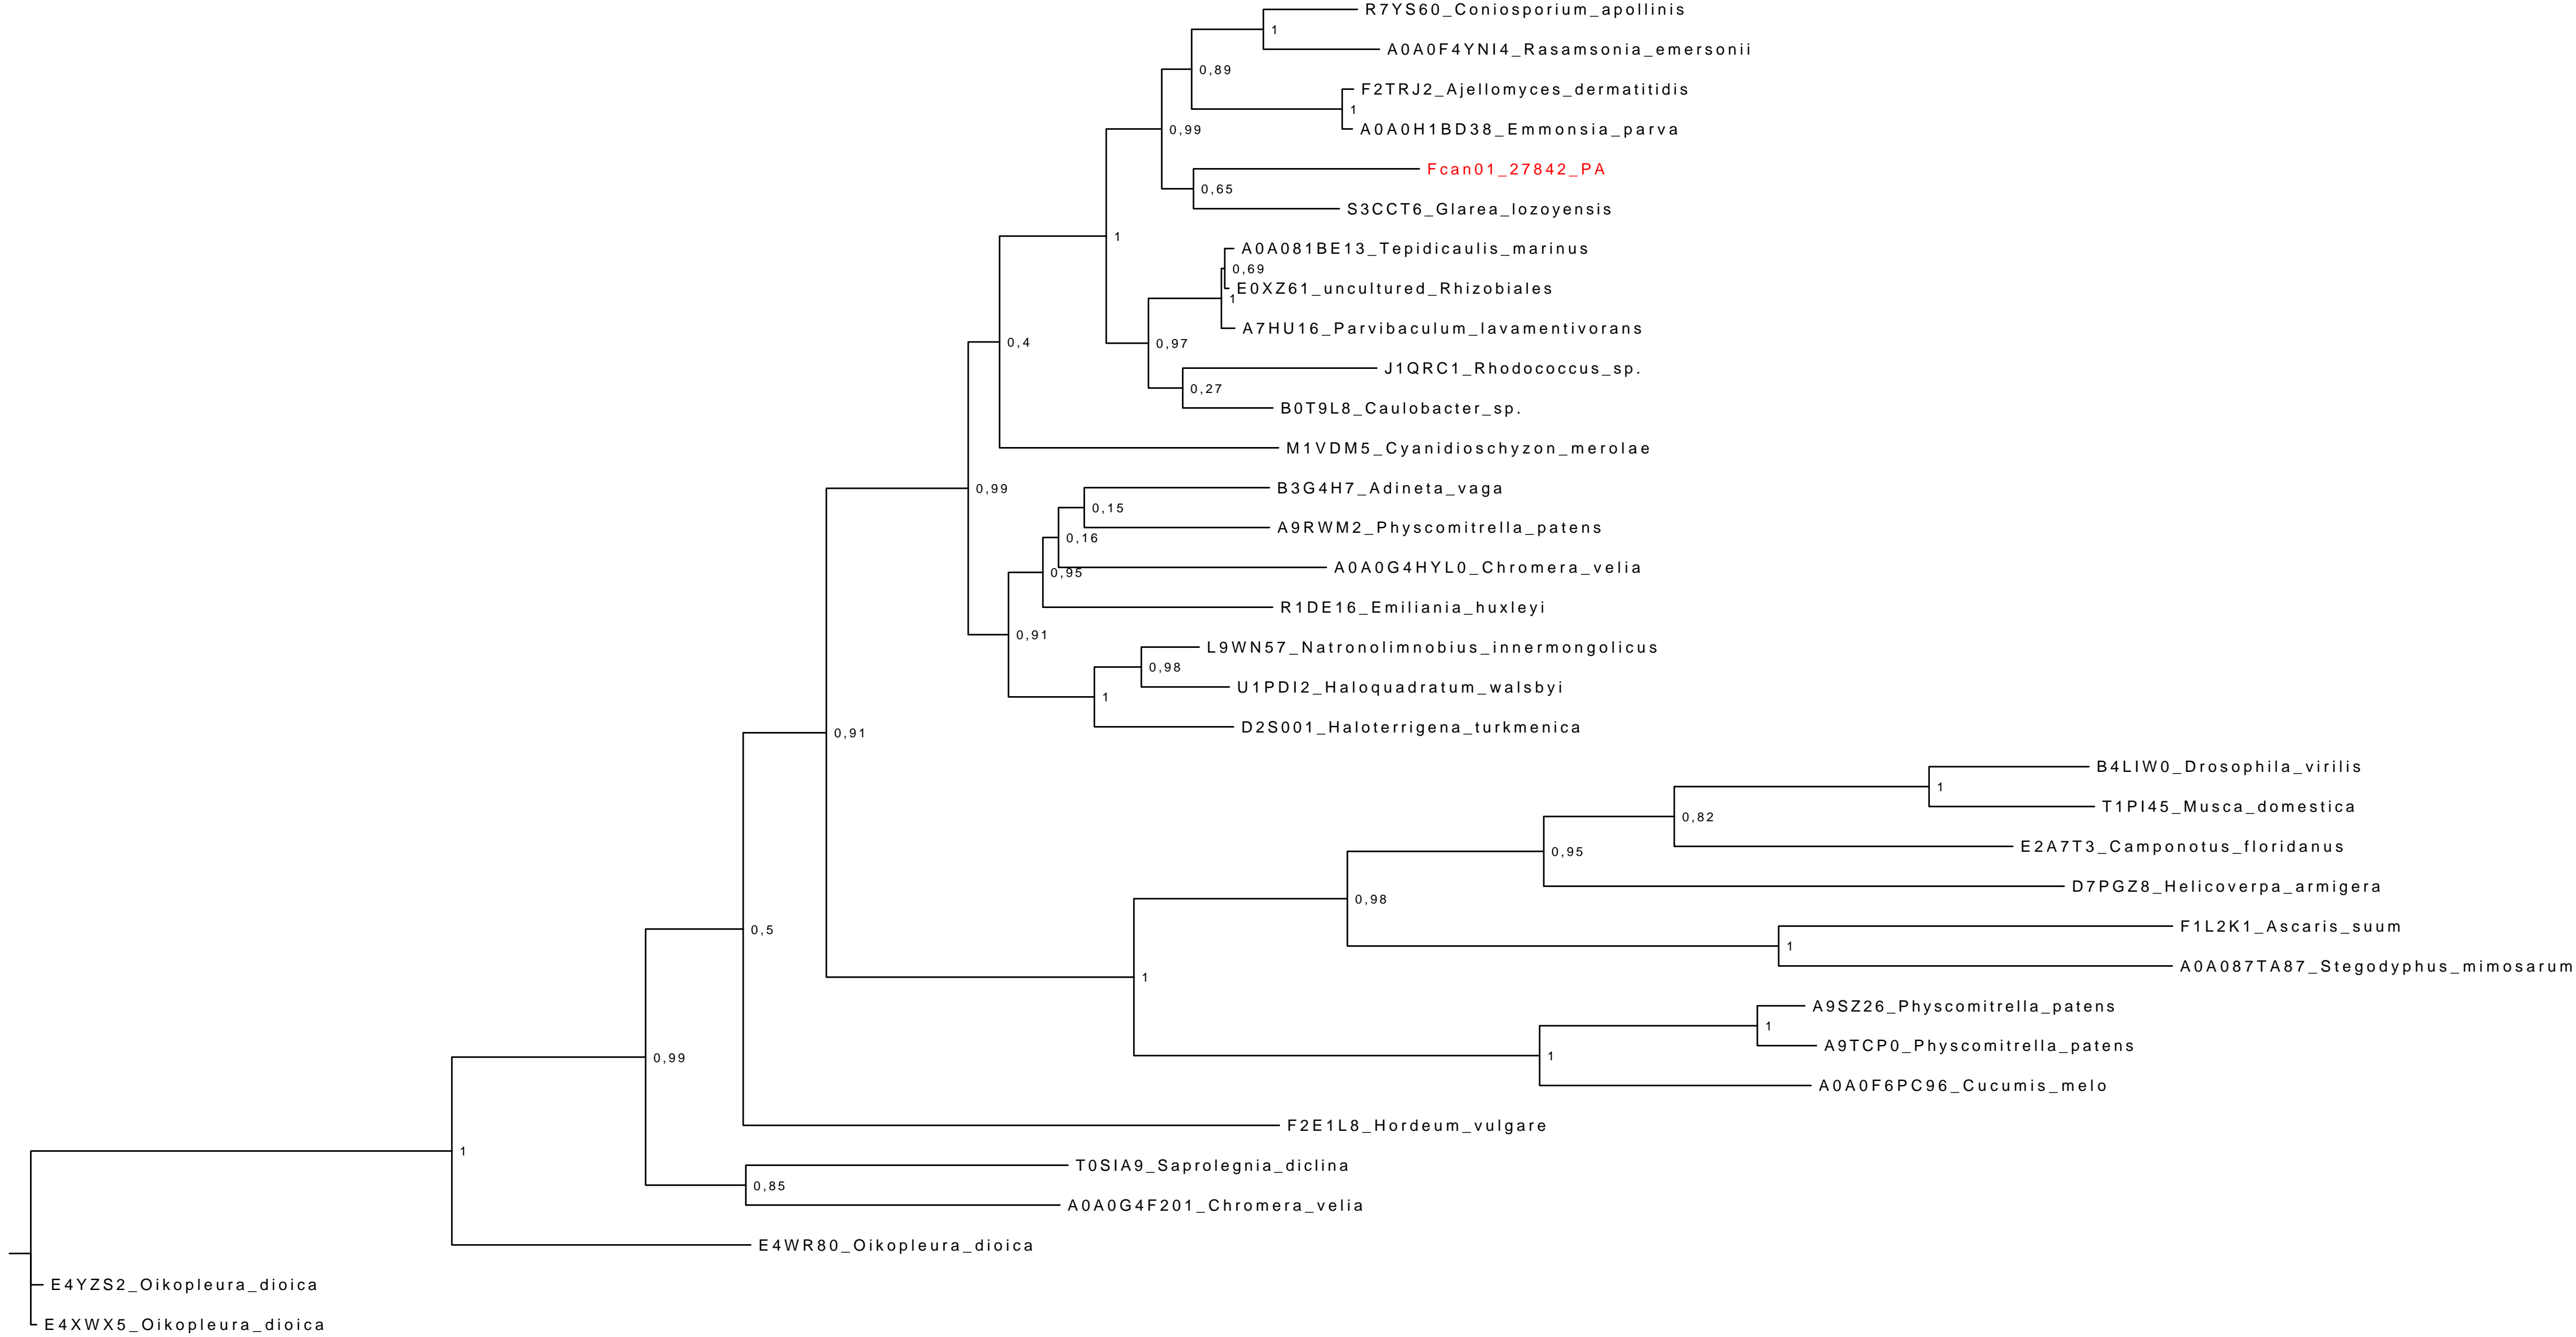

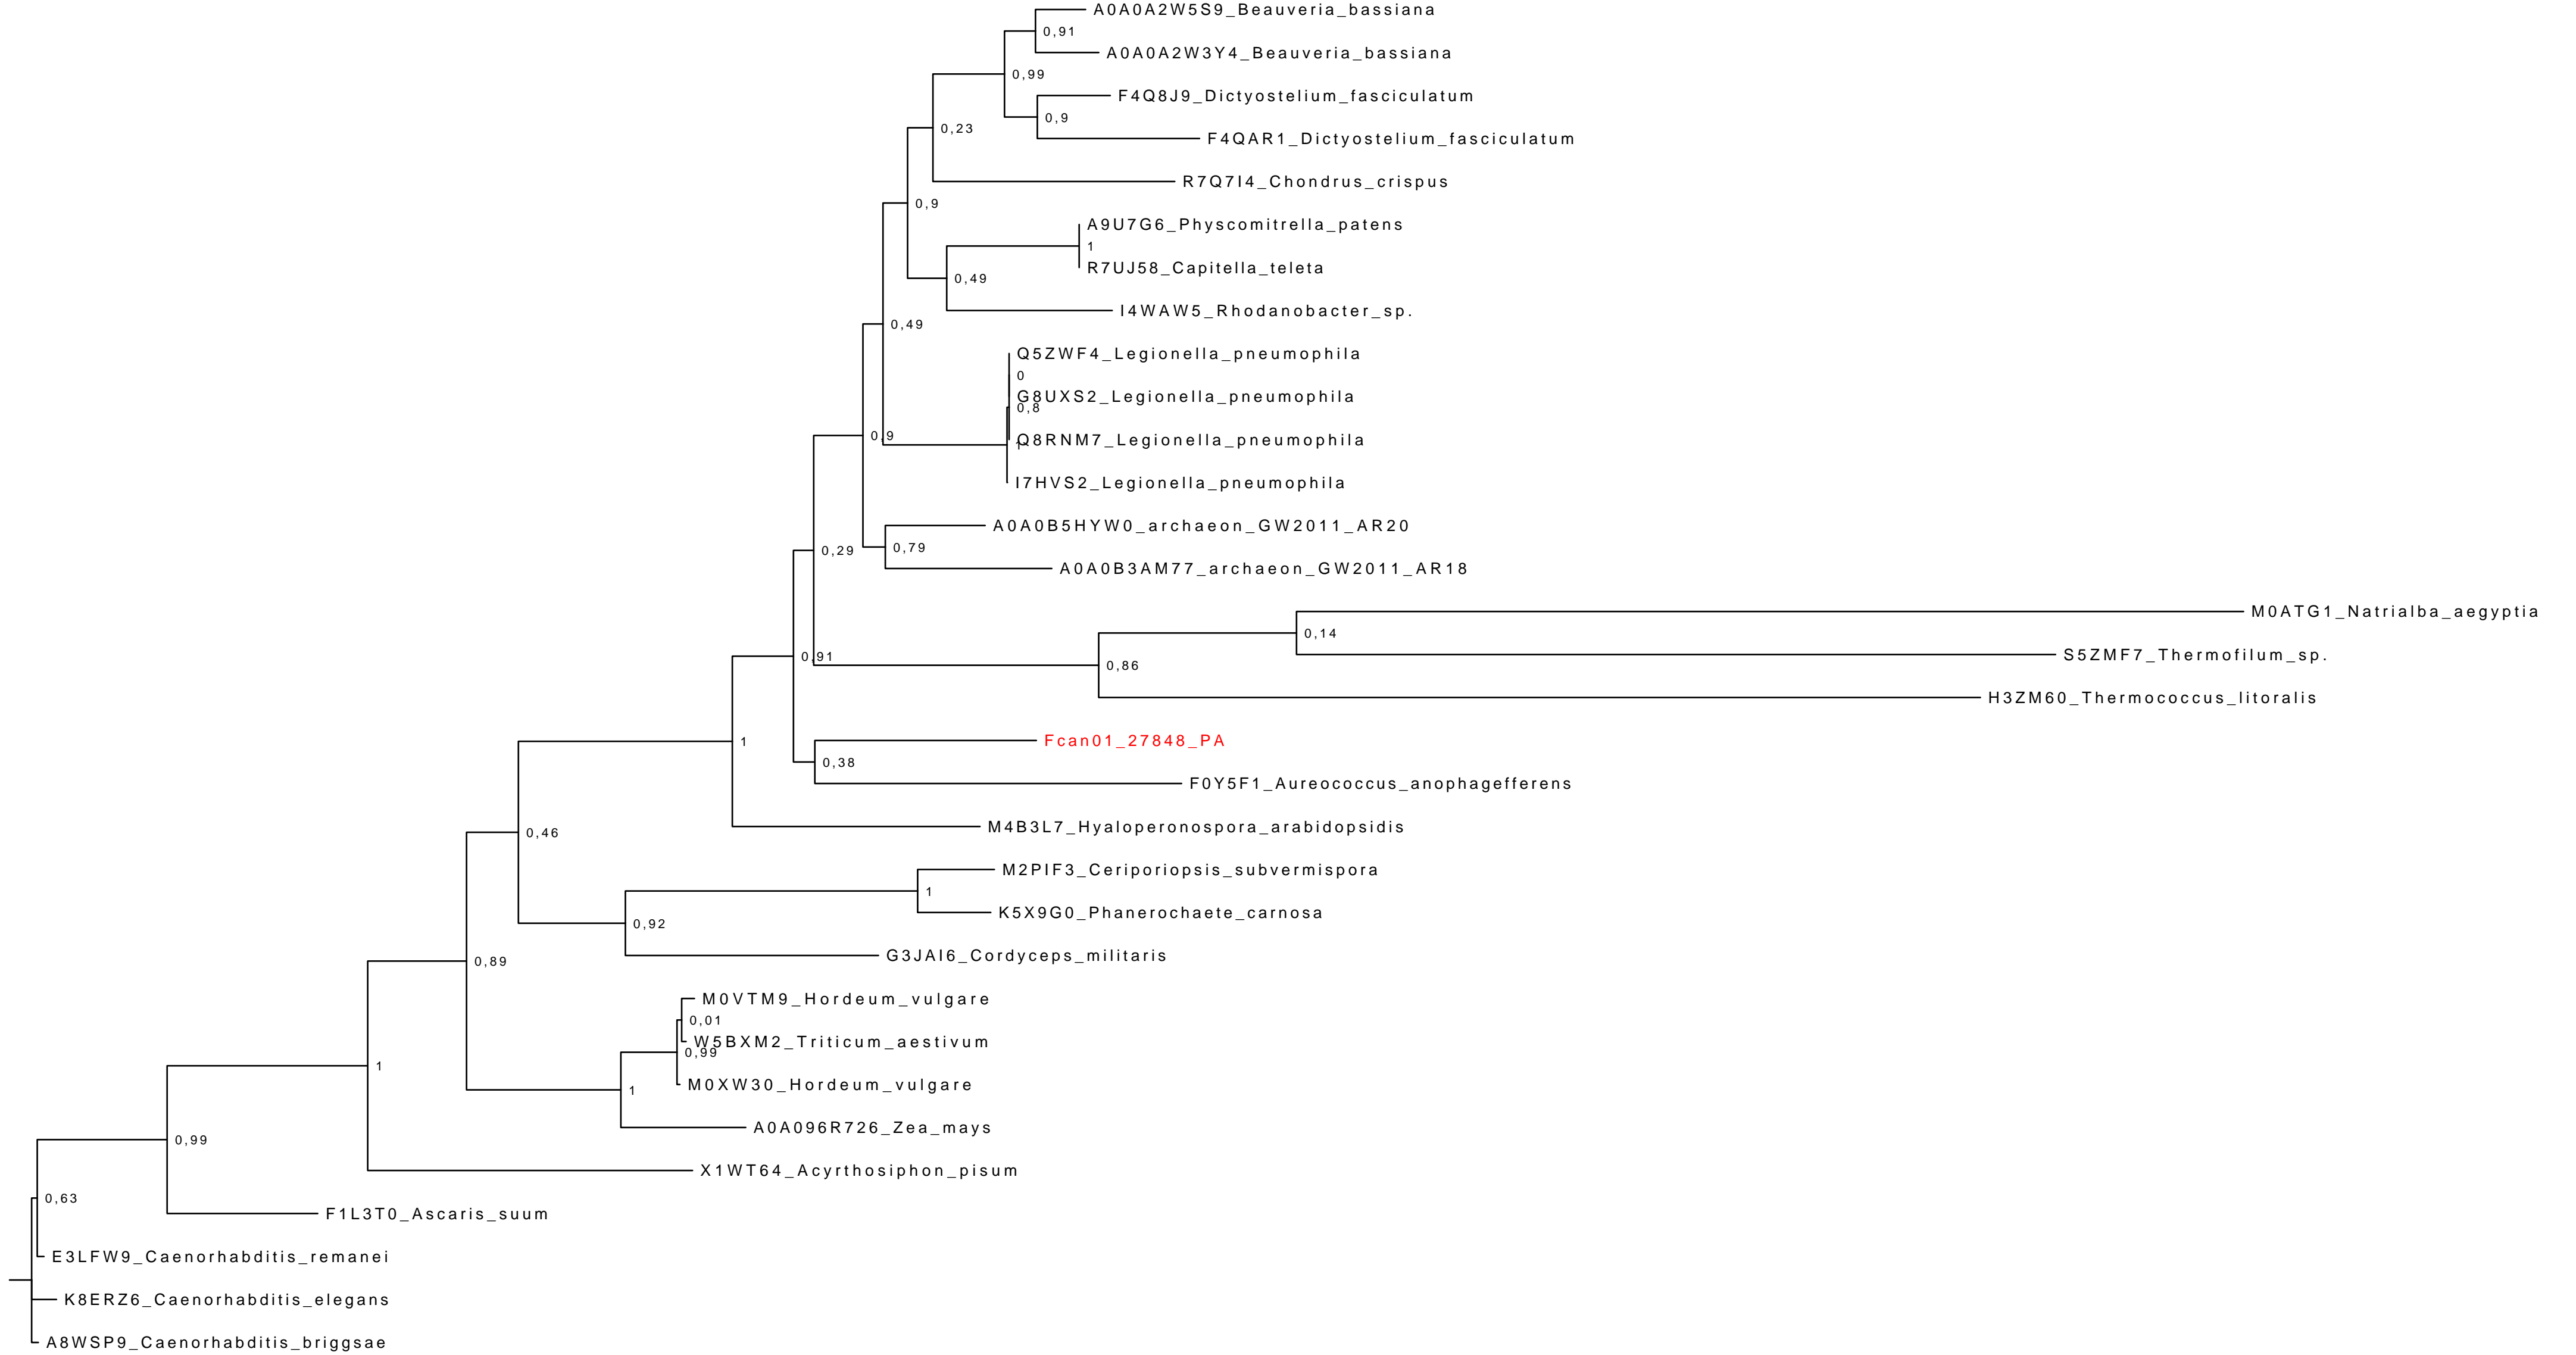

0.8

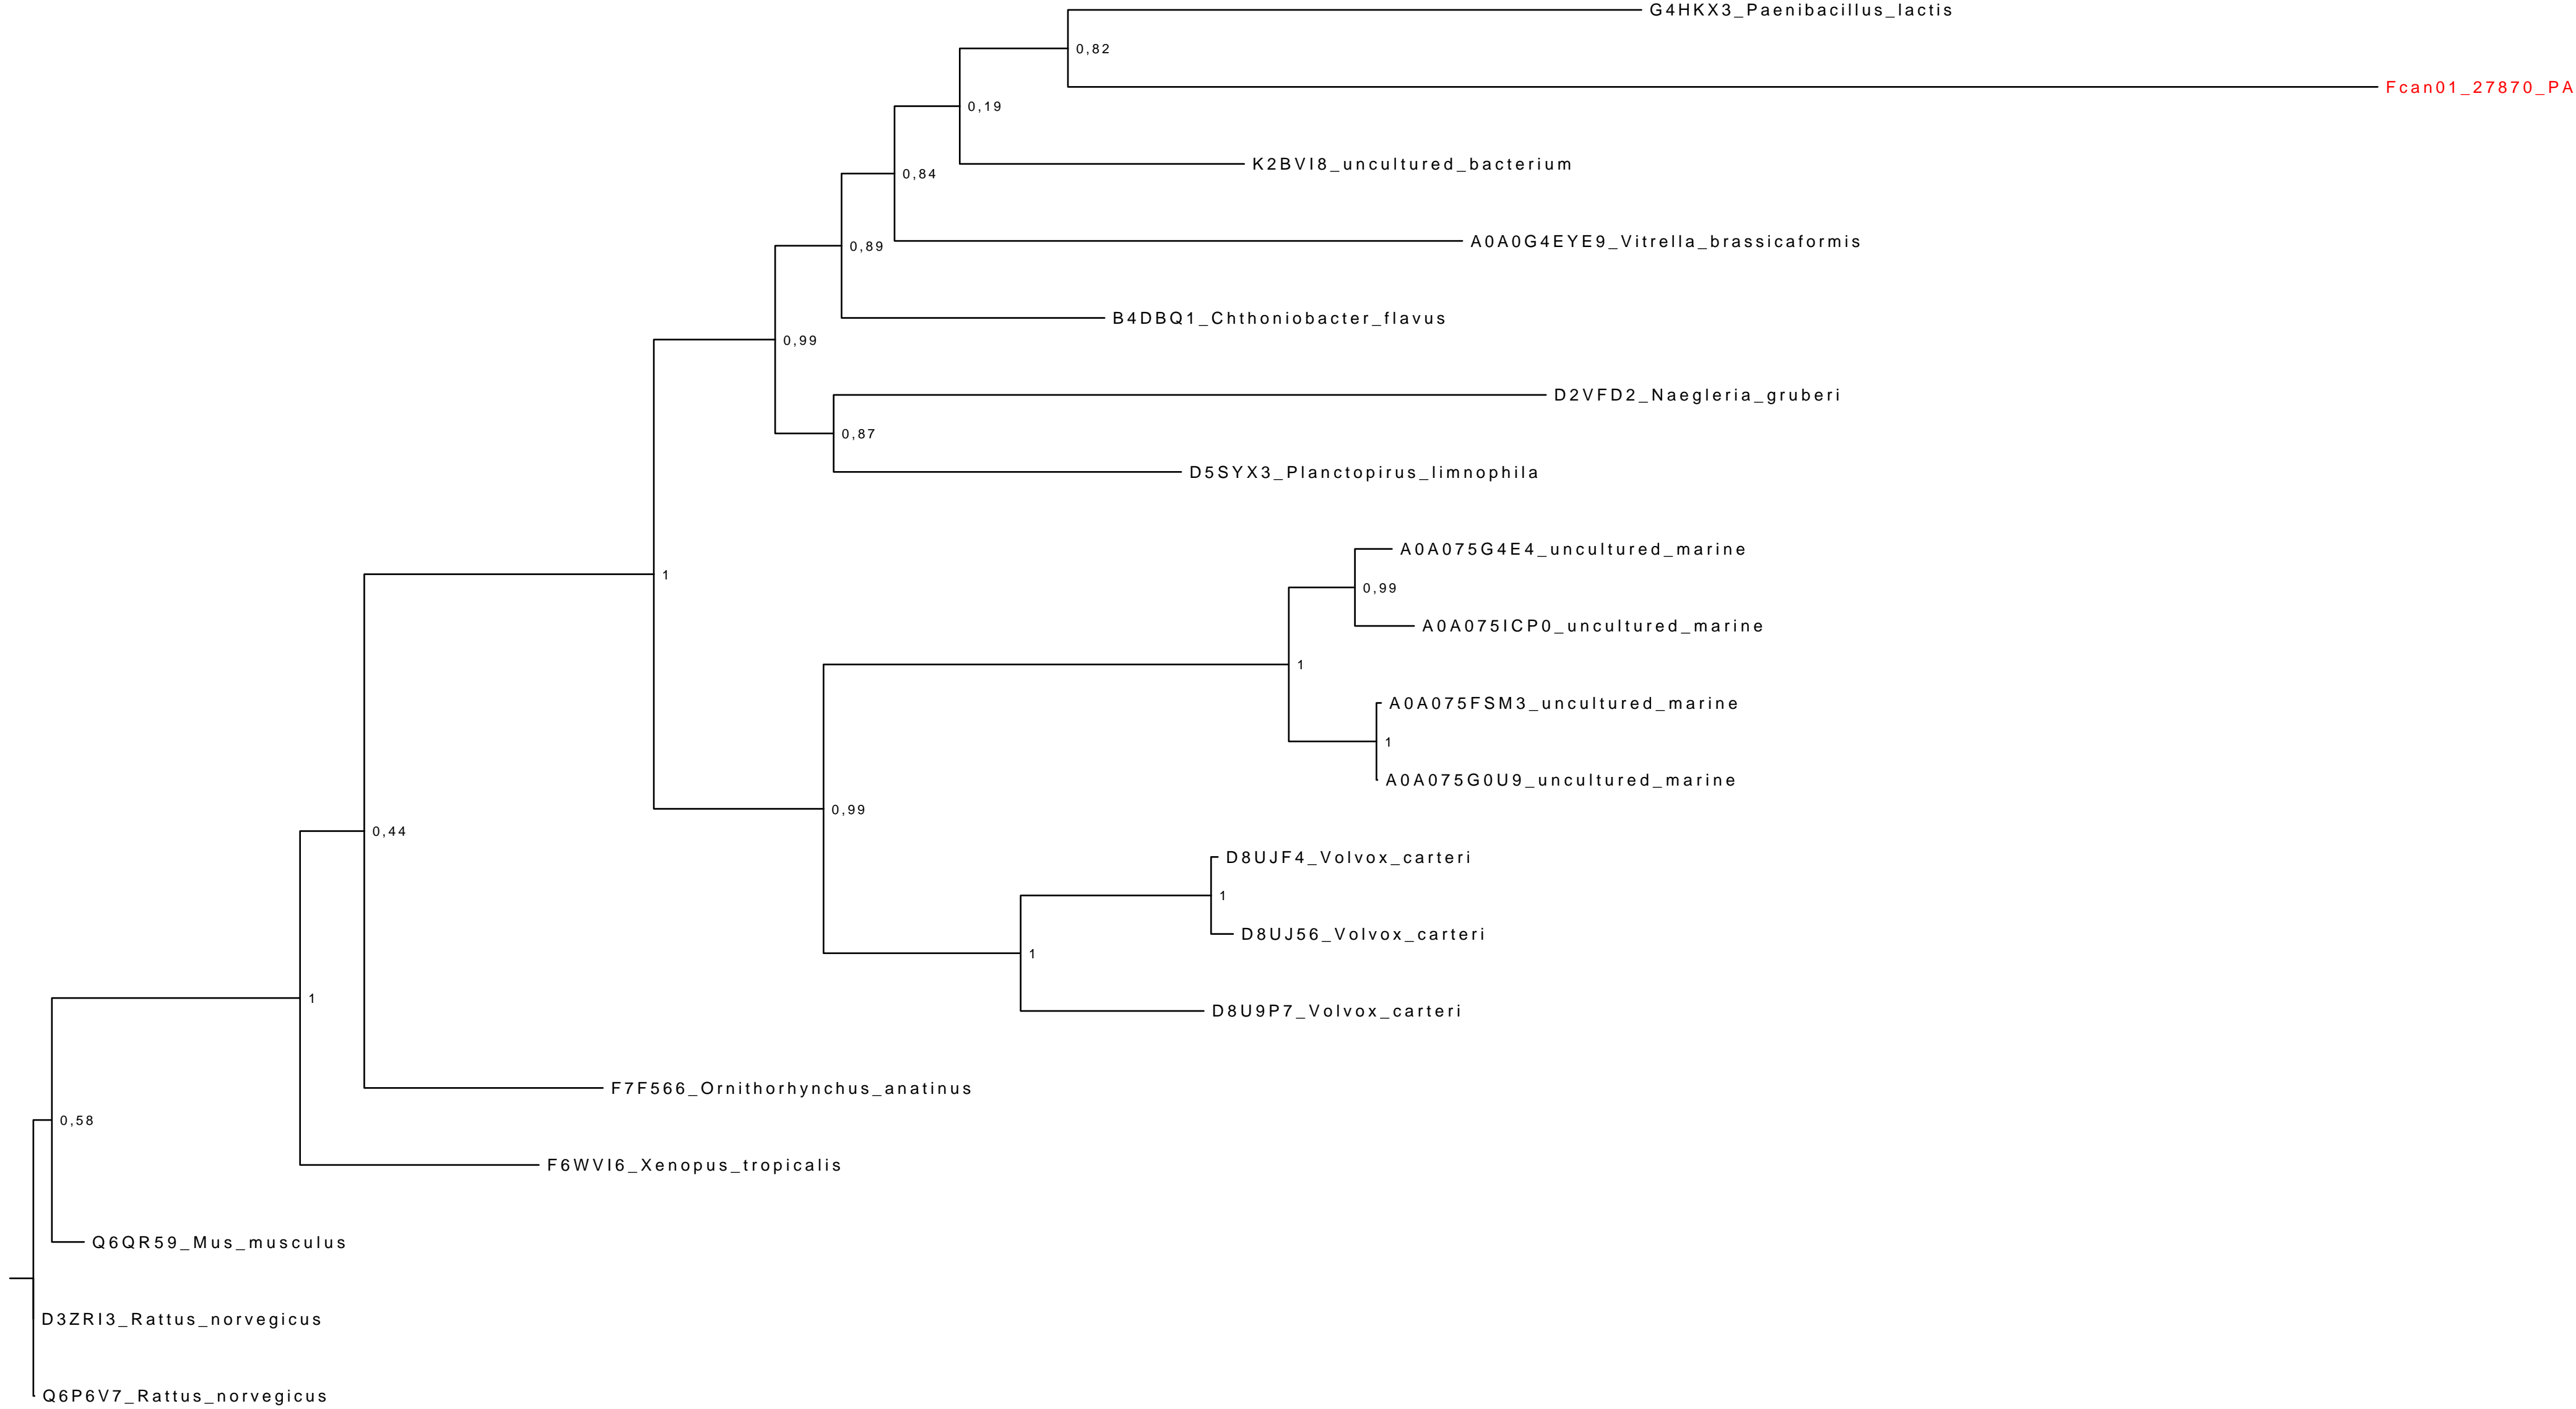

0.6

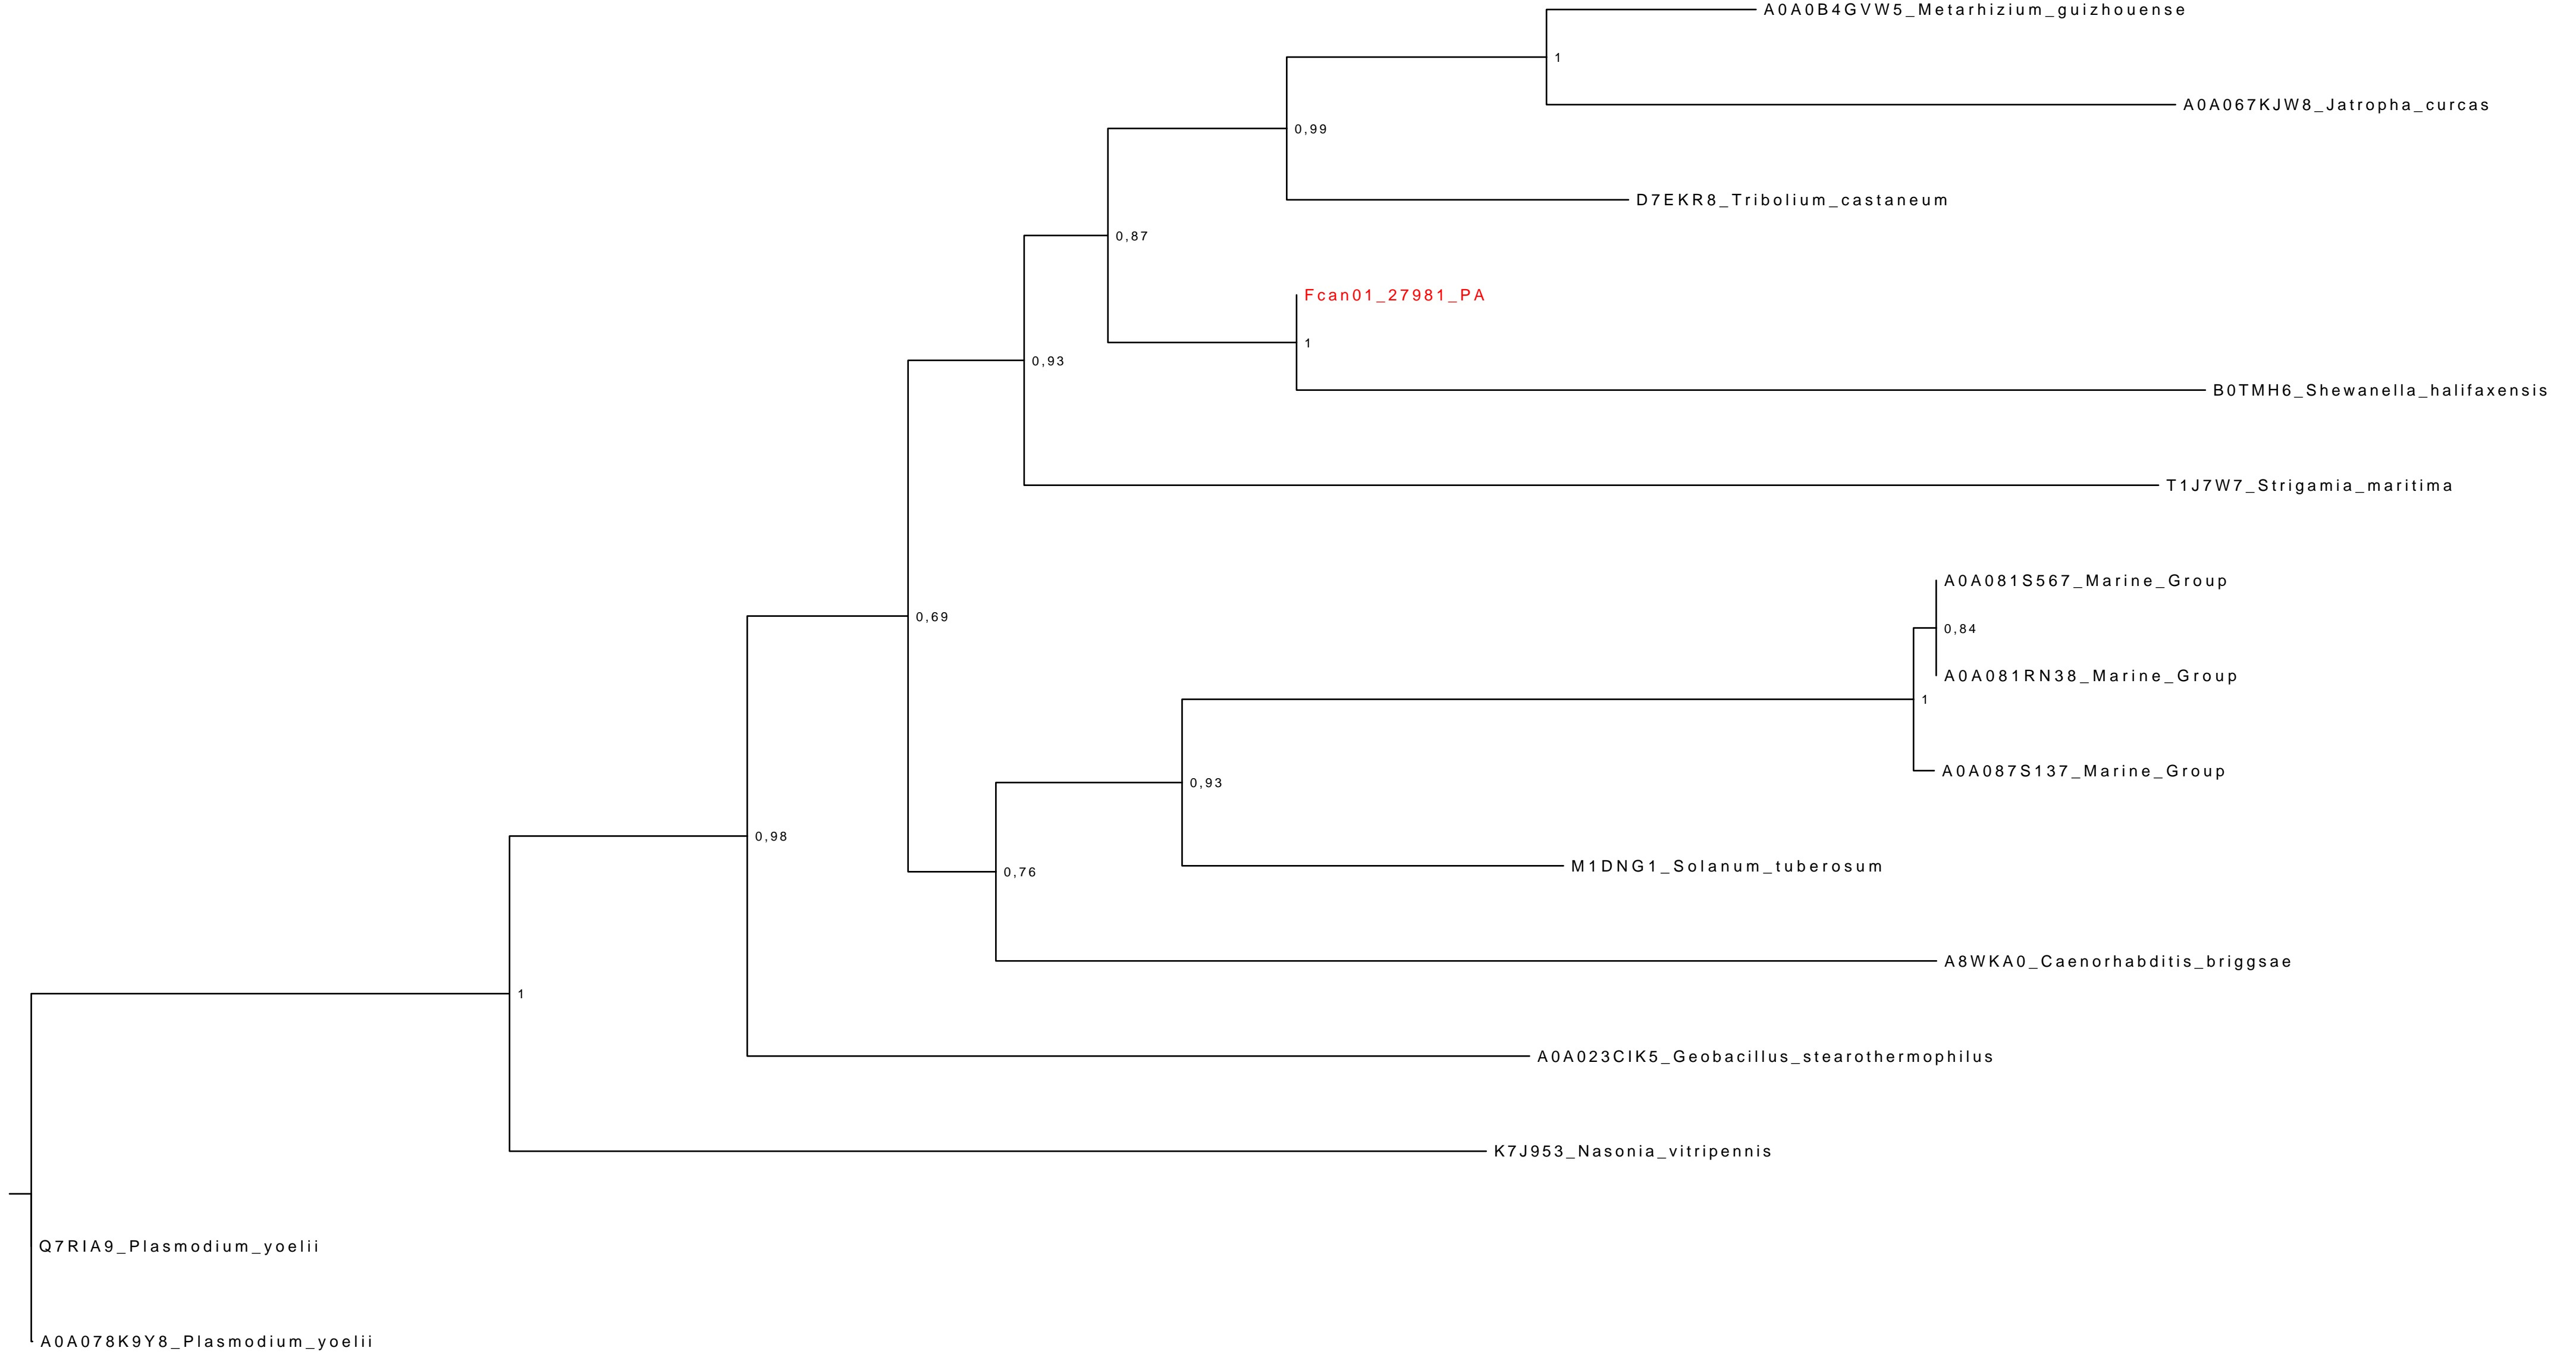

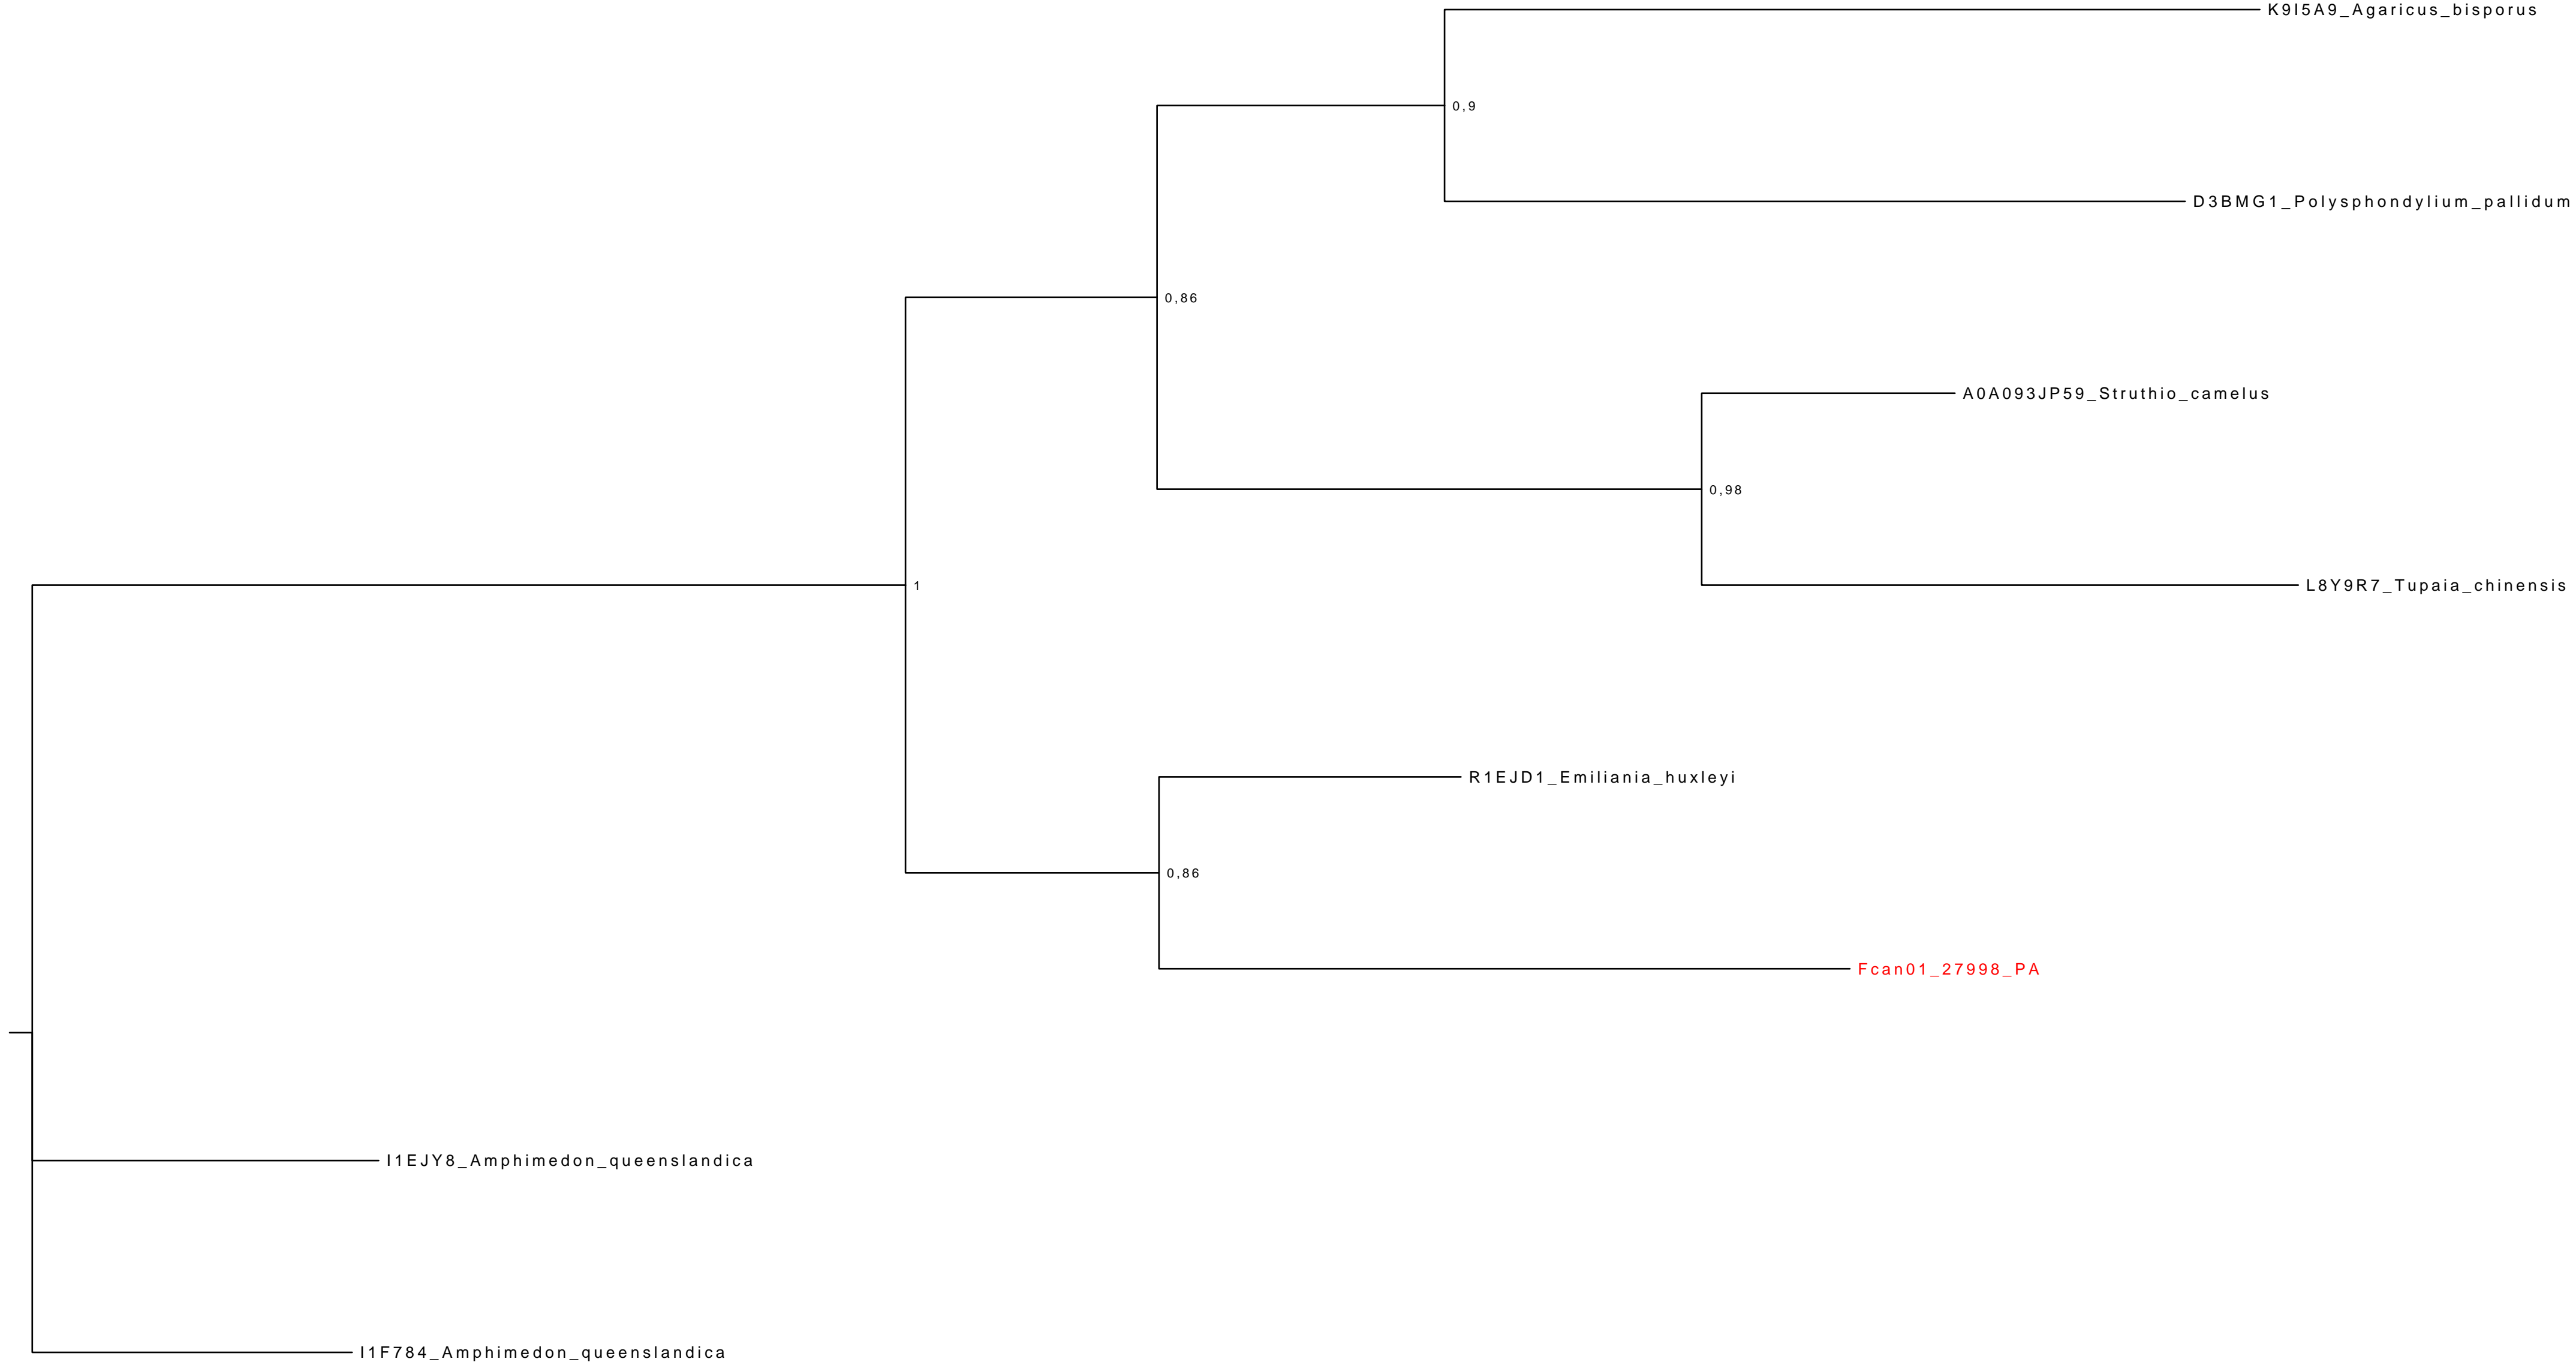





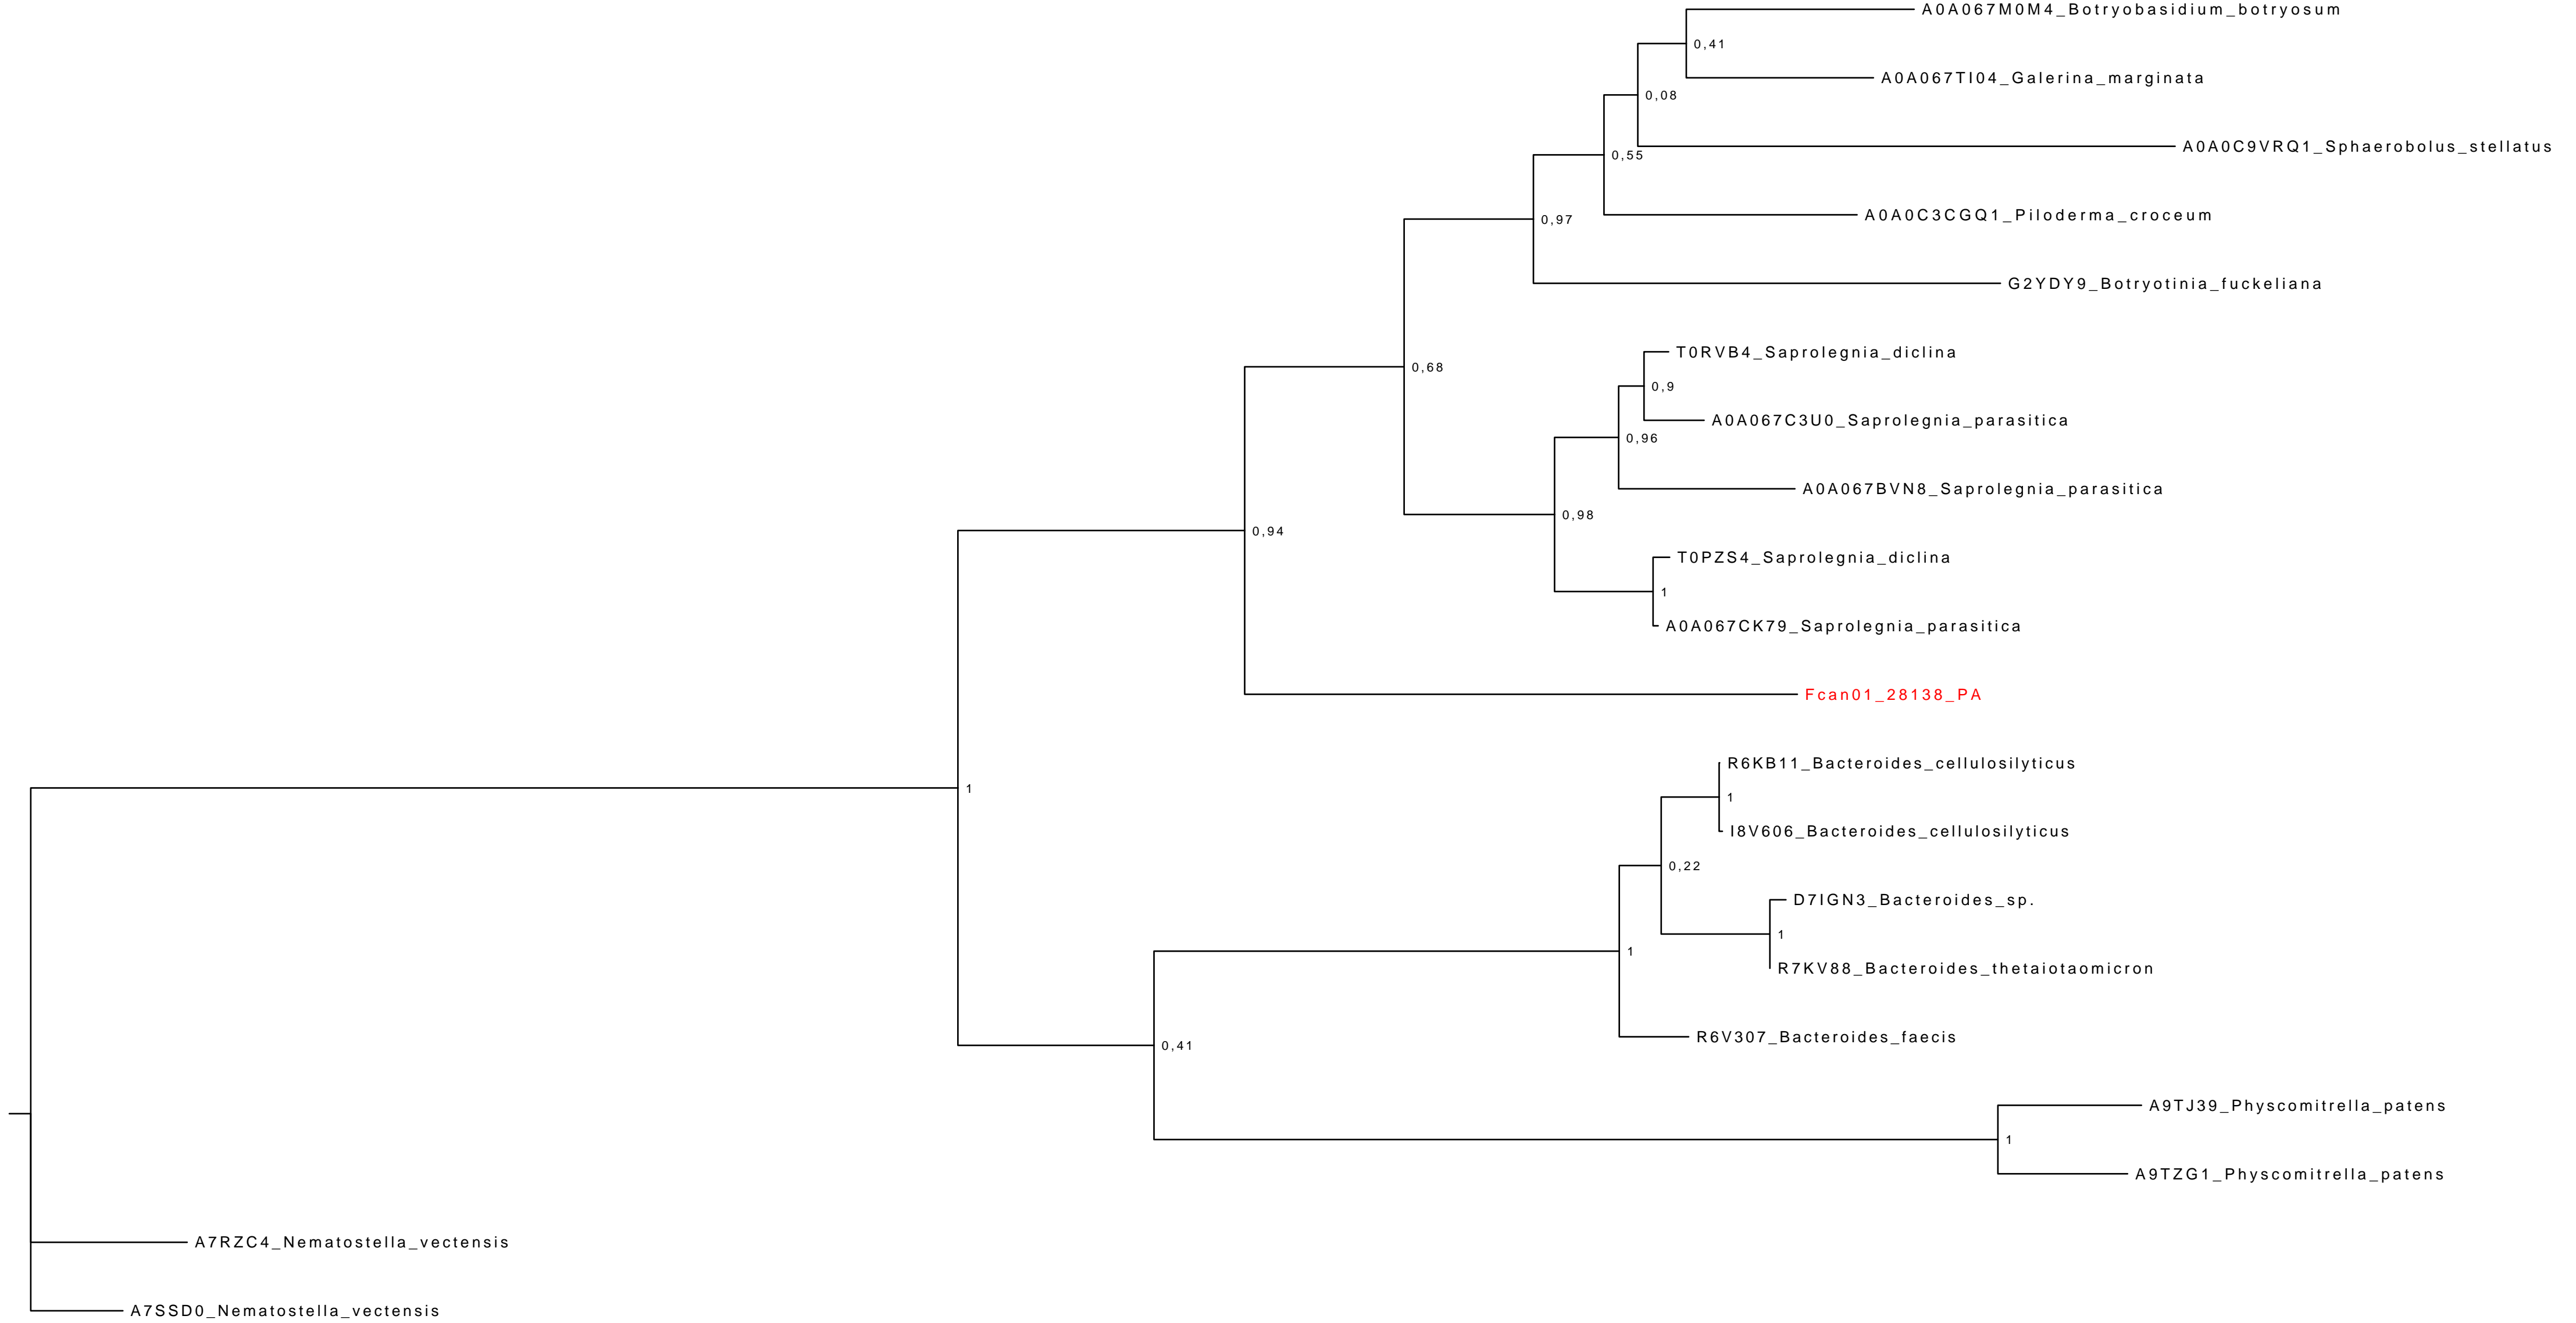

0.6

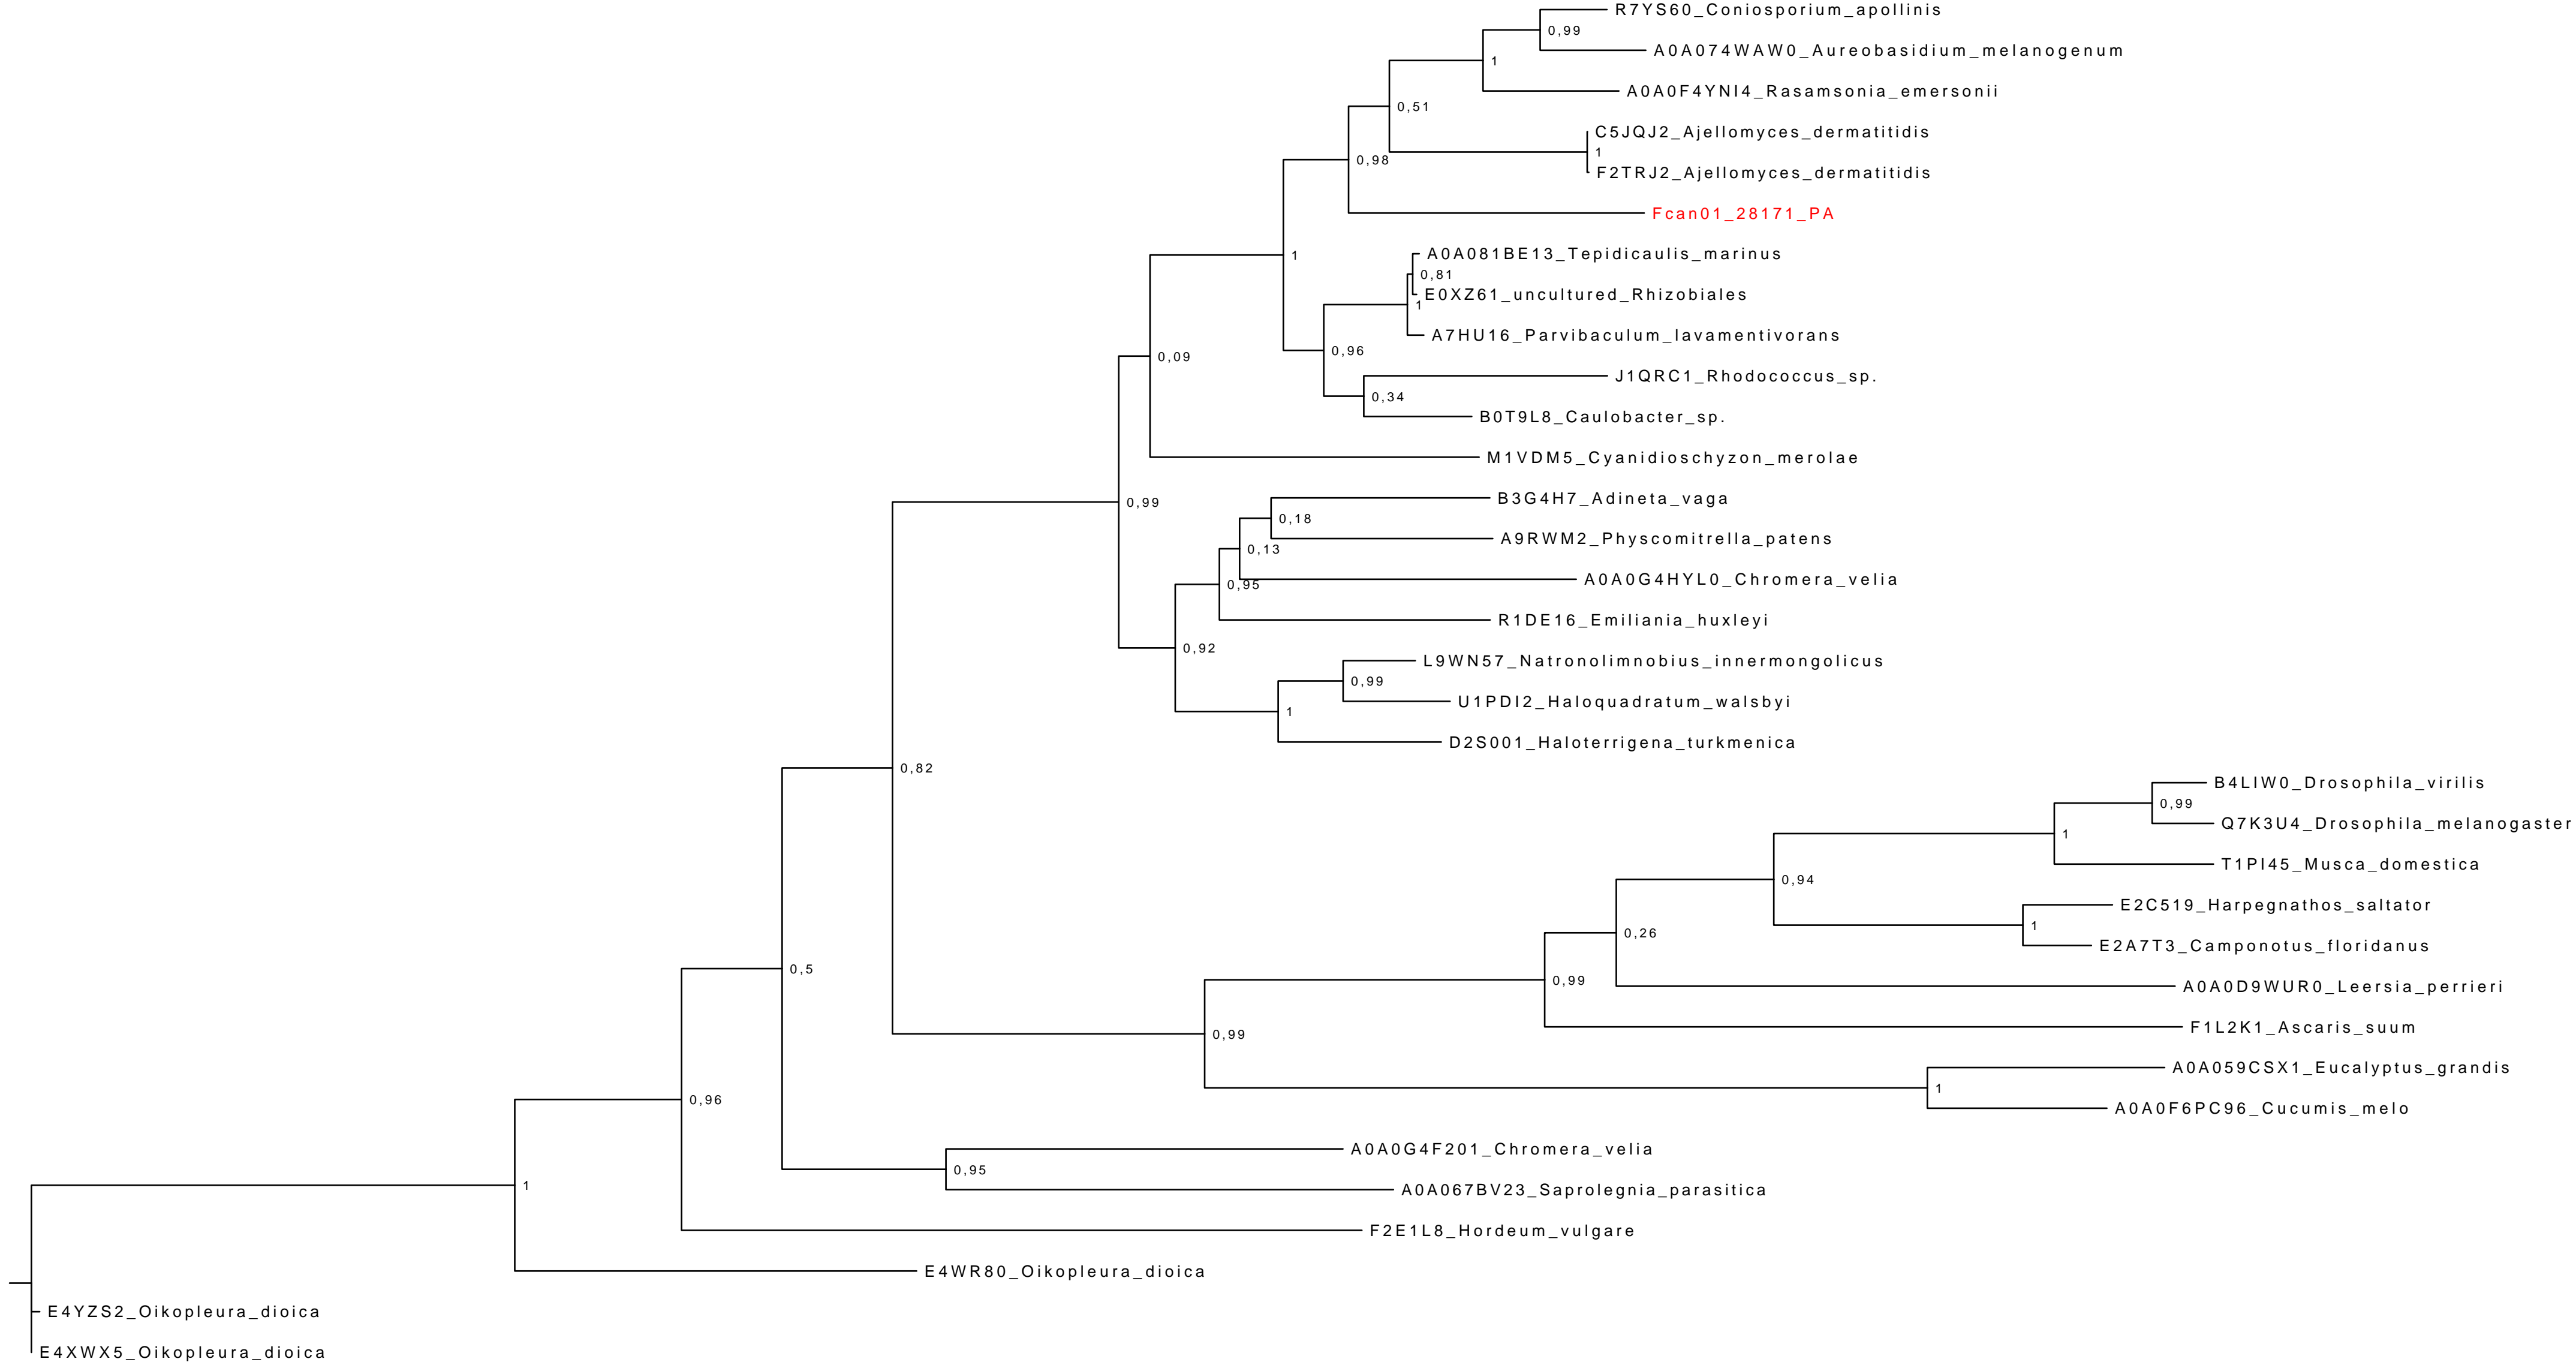

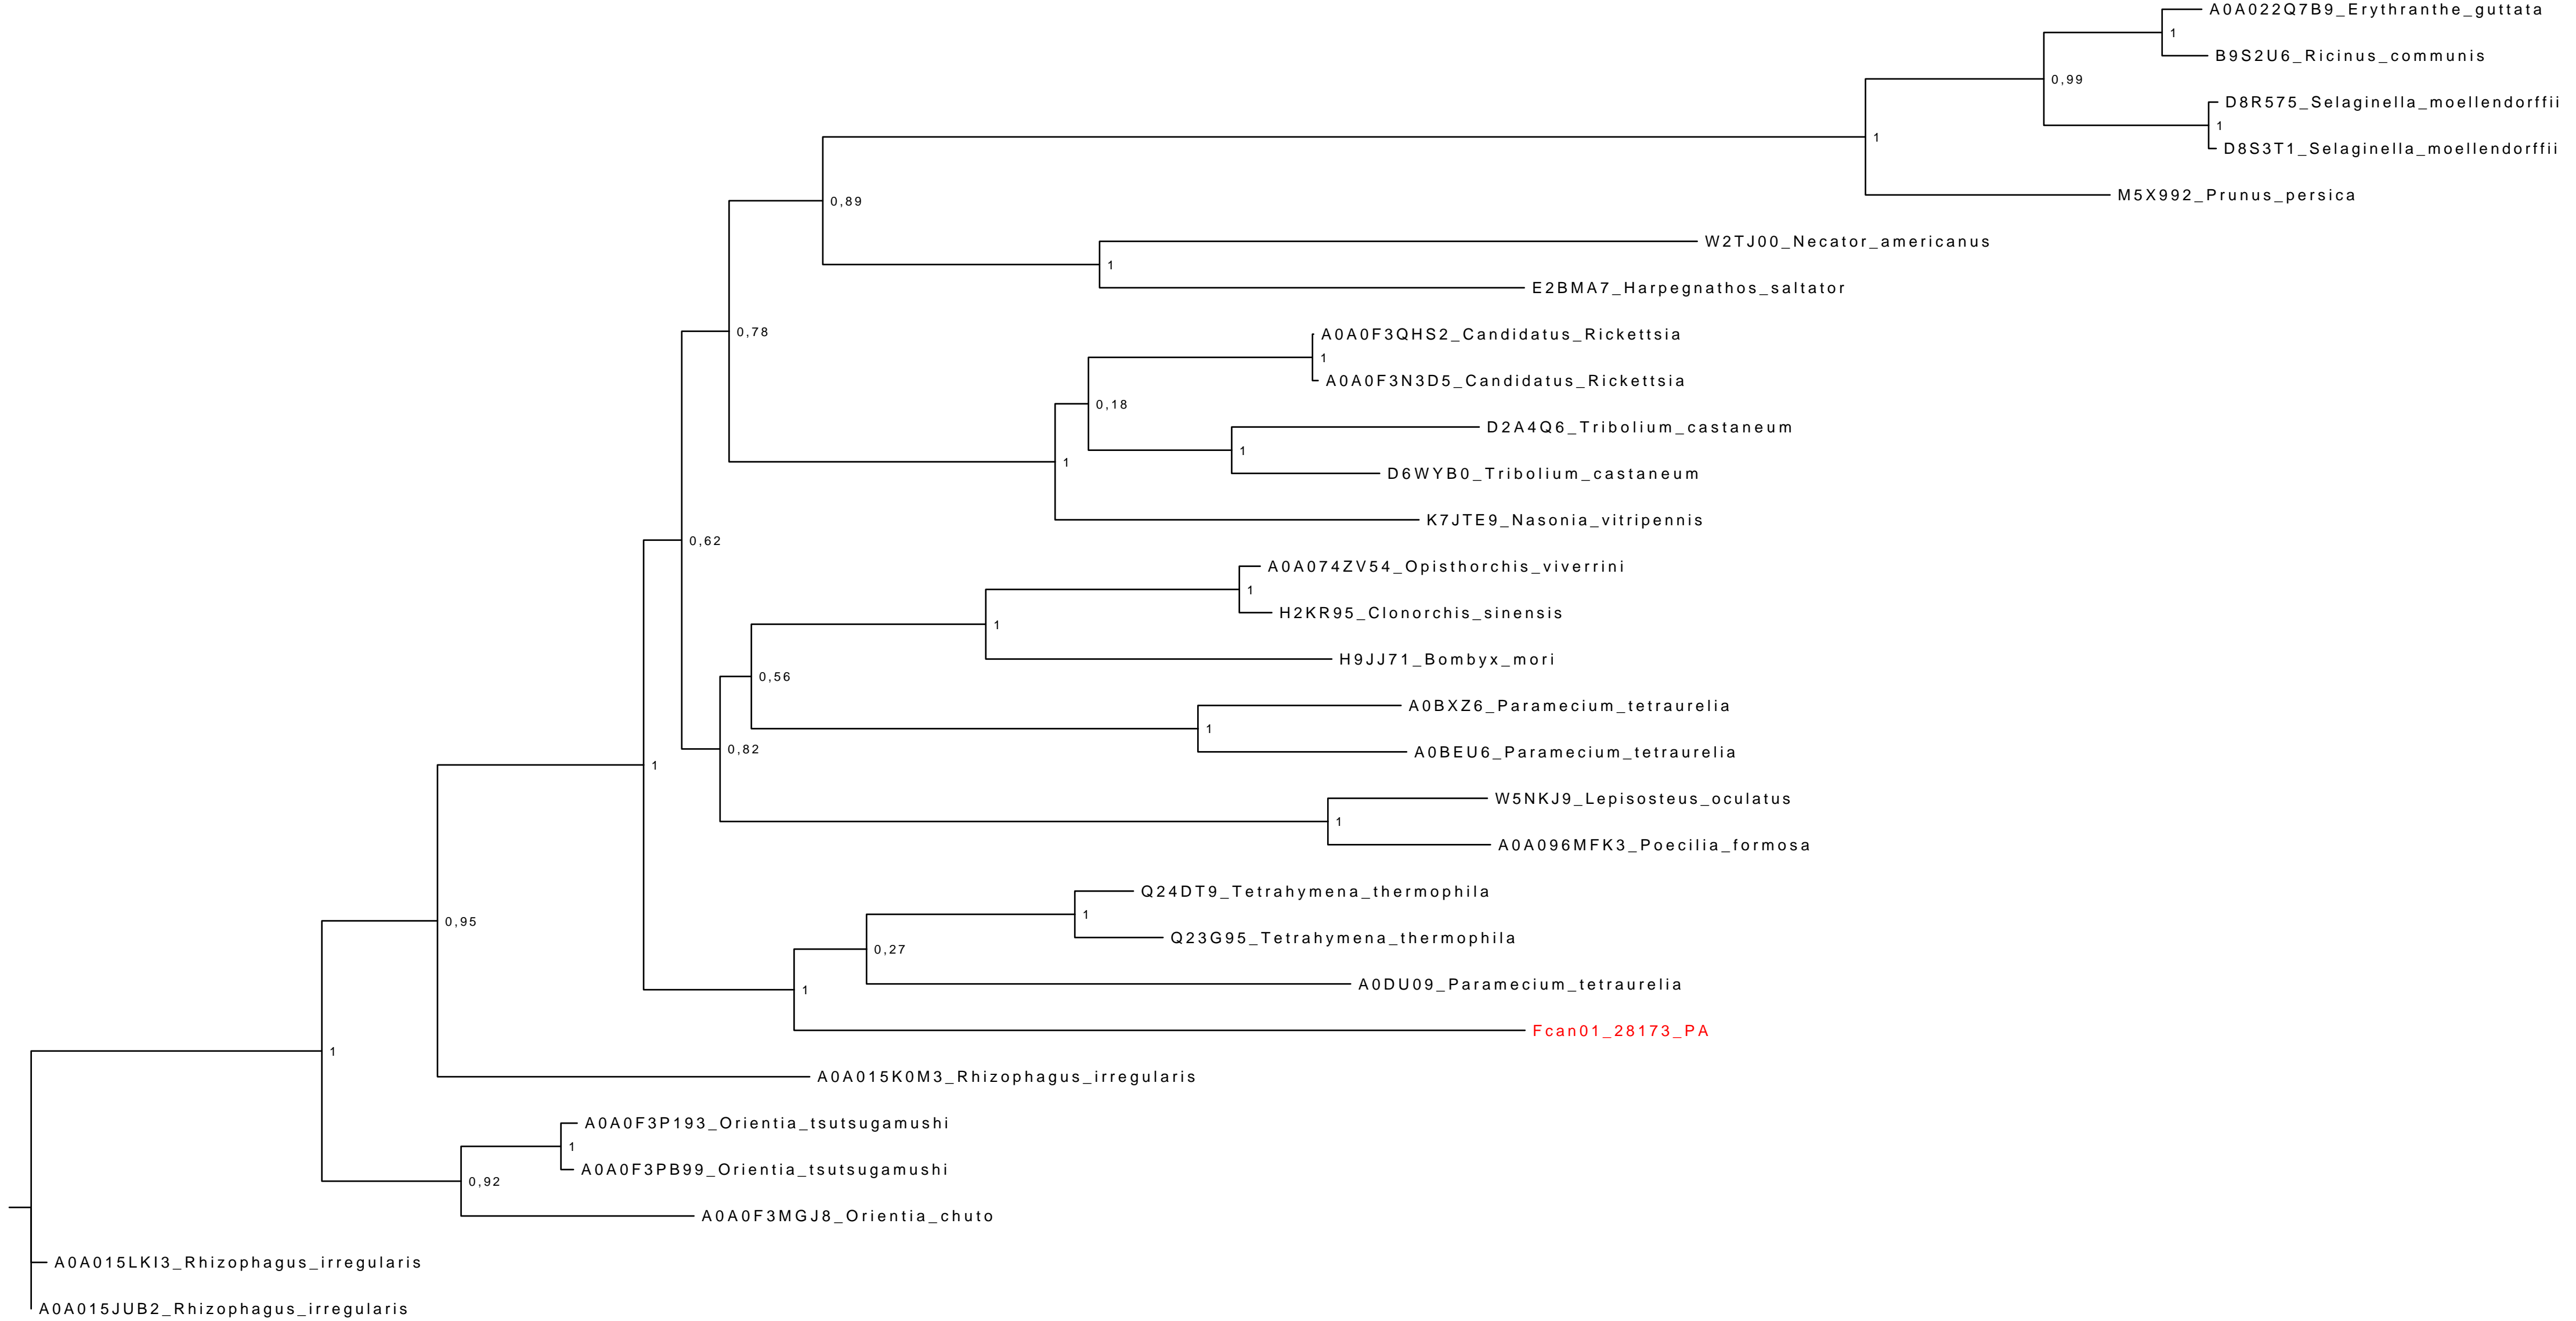

0.7

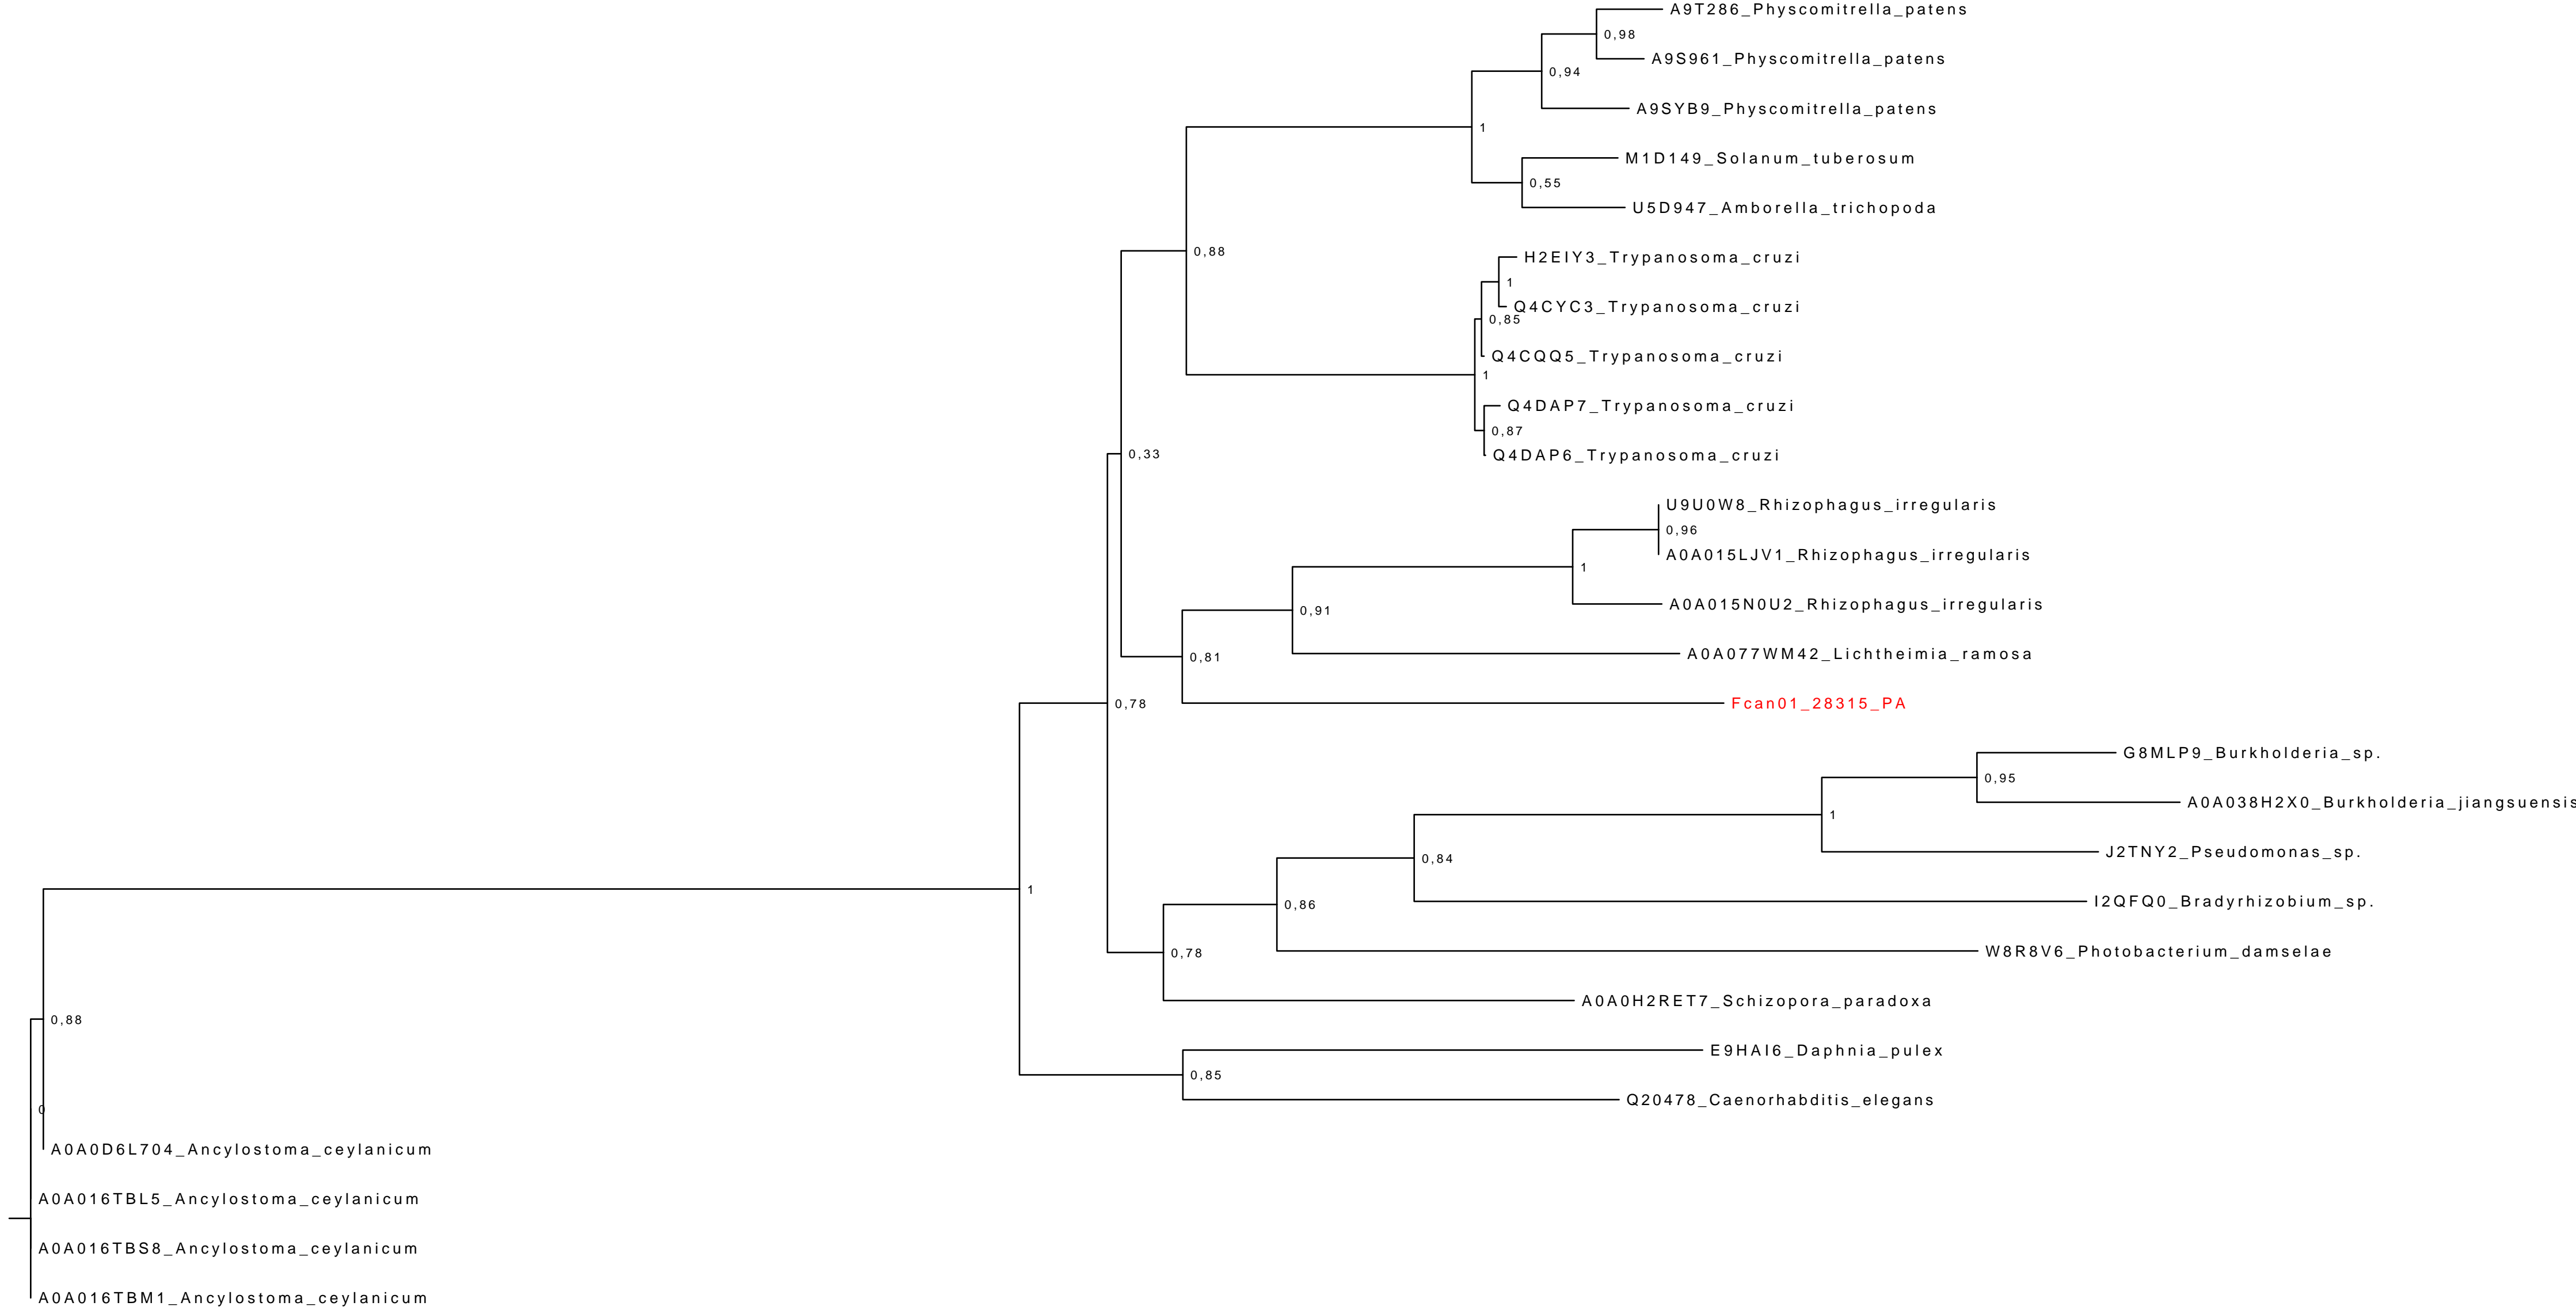

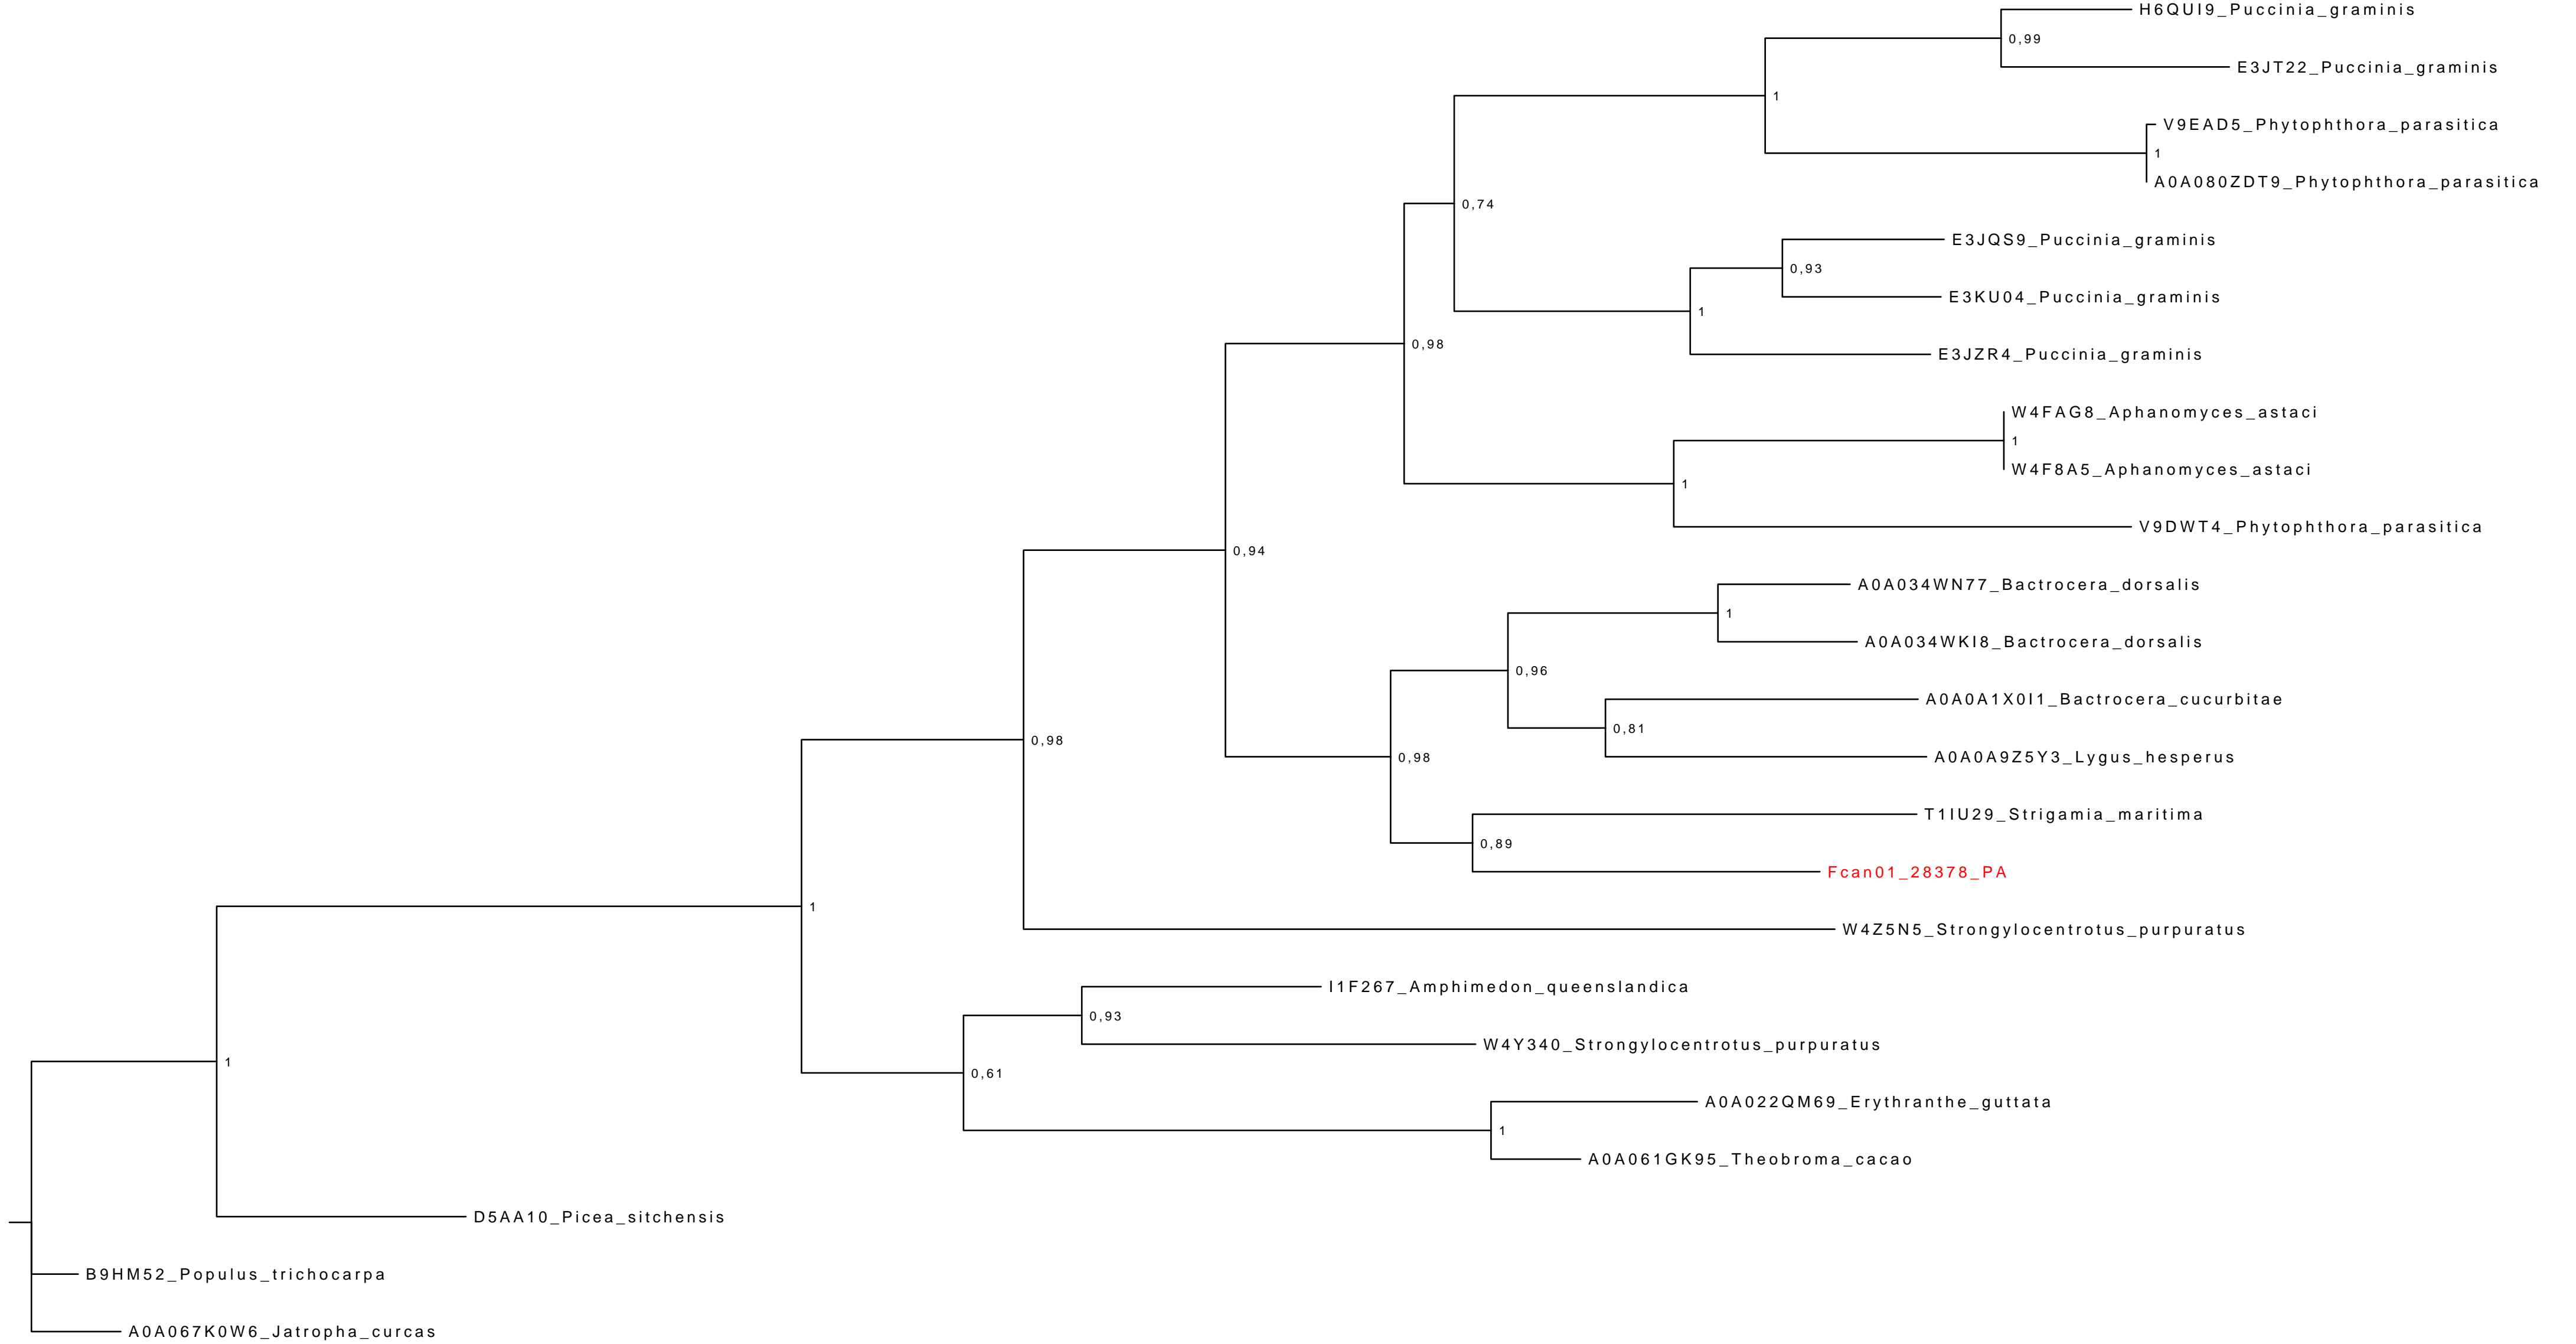

0.5

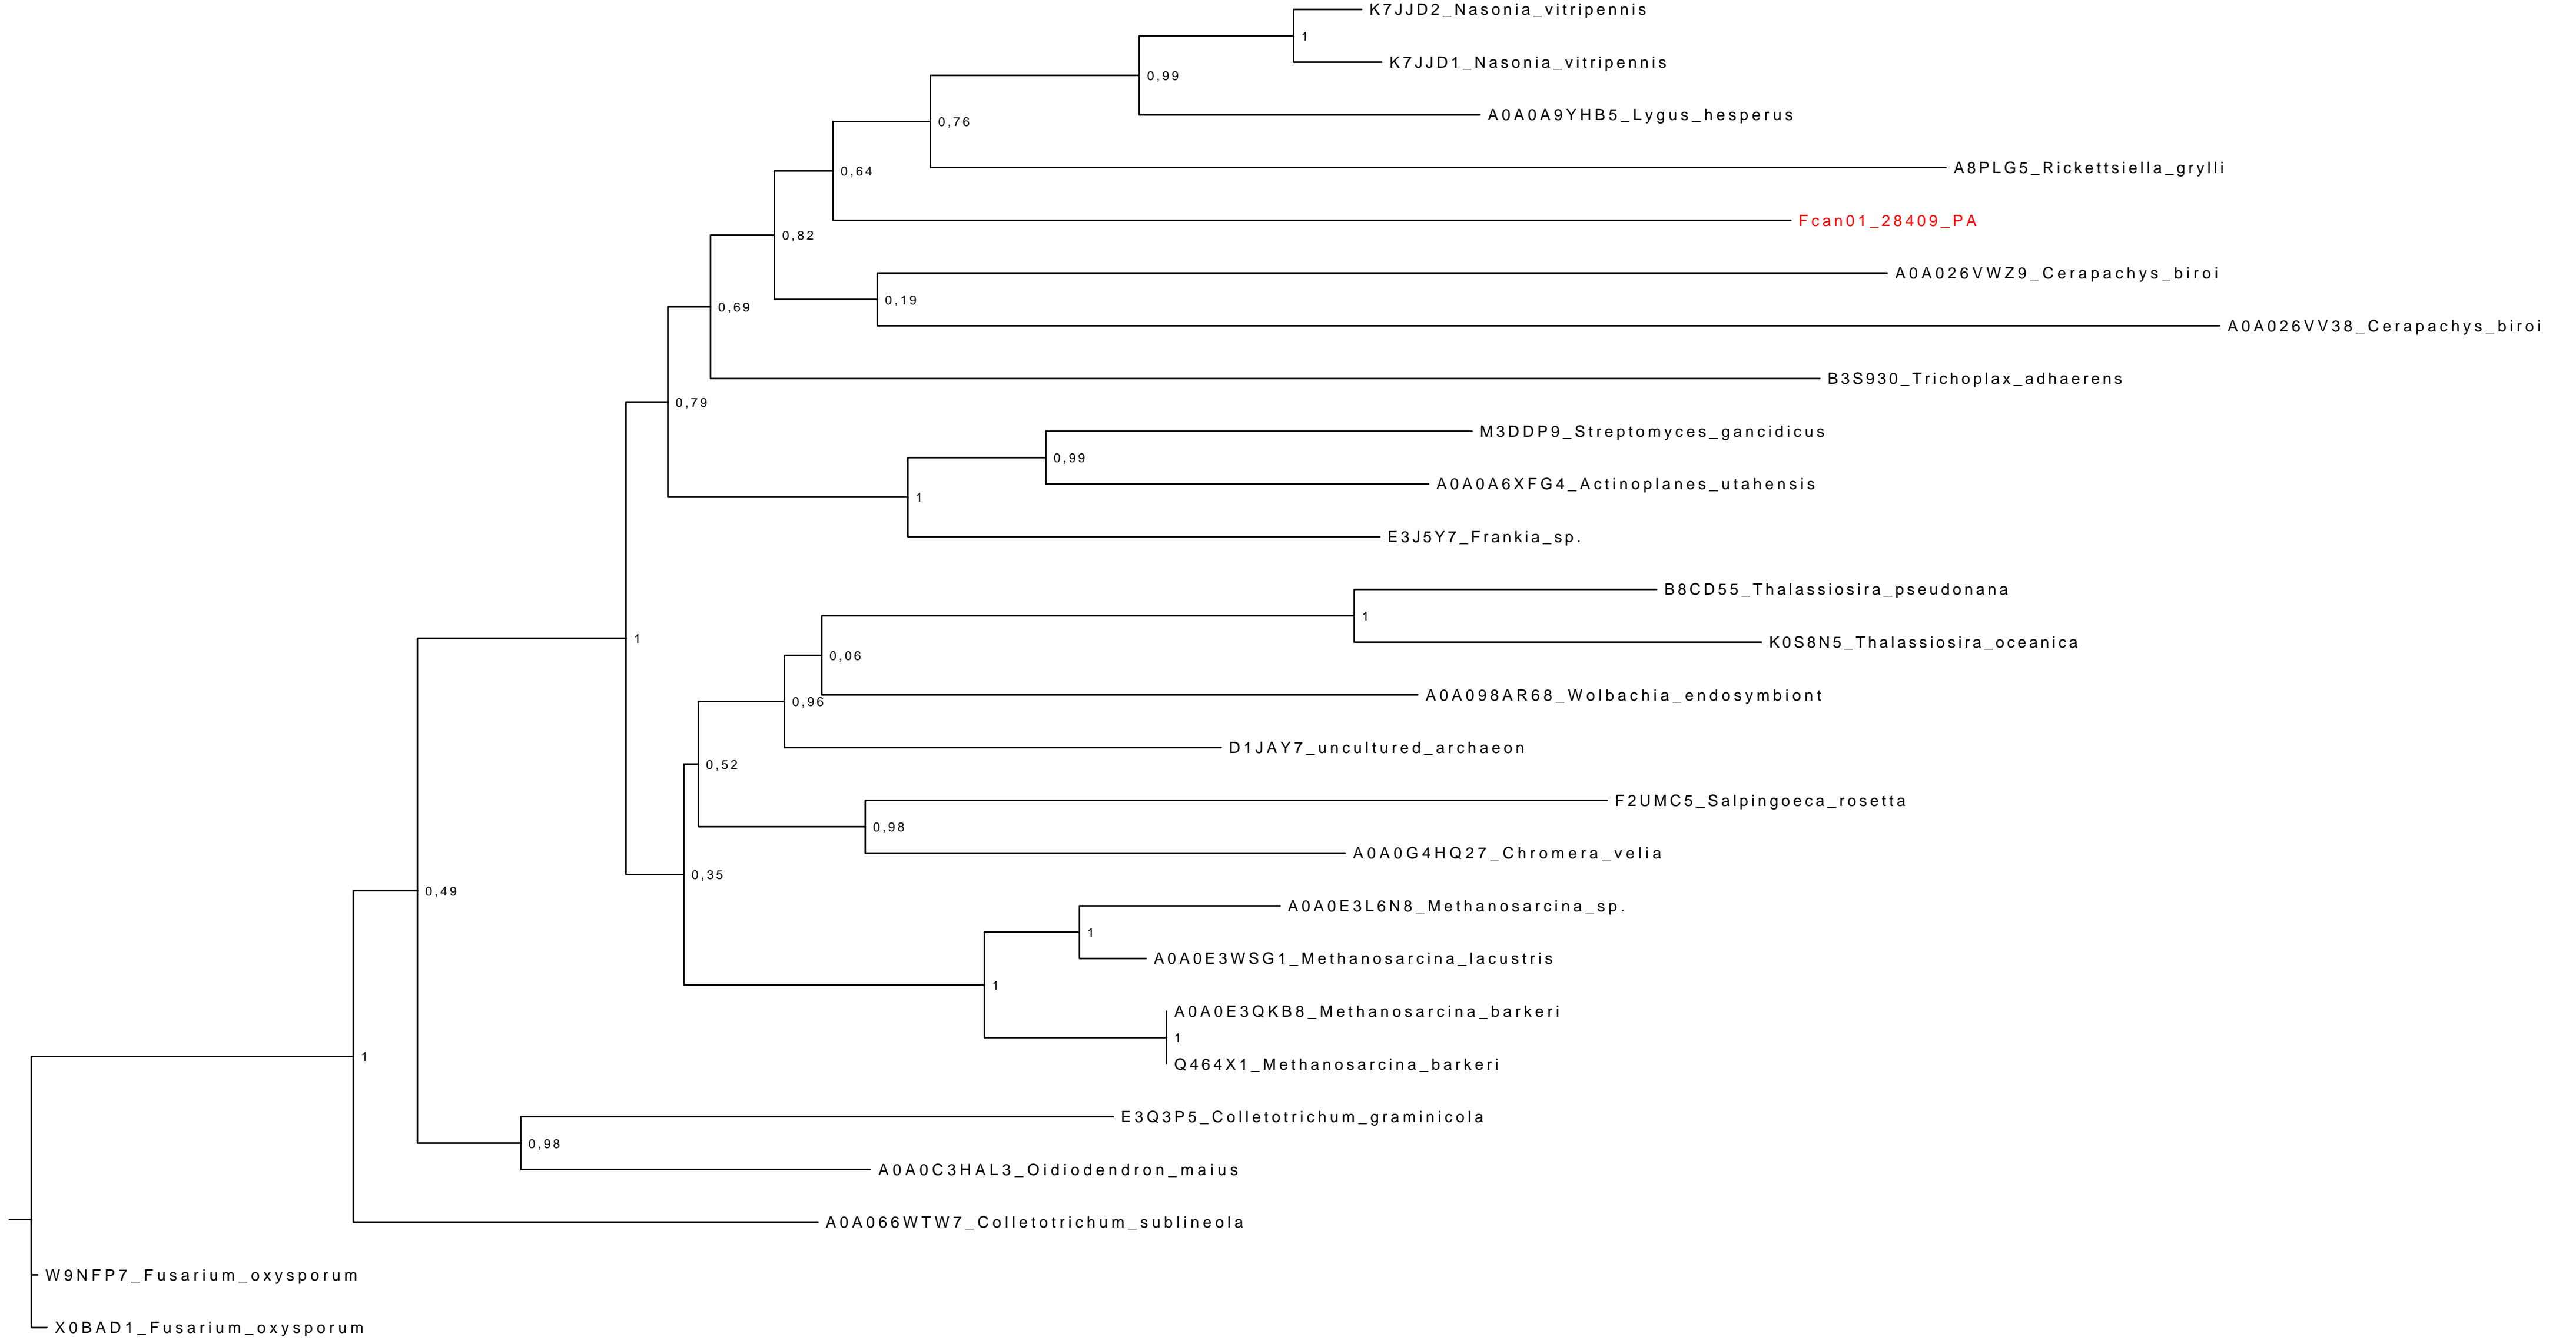

0.5

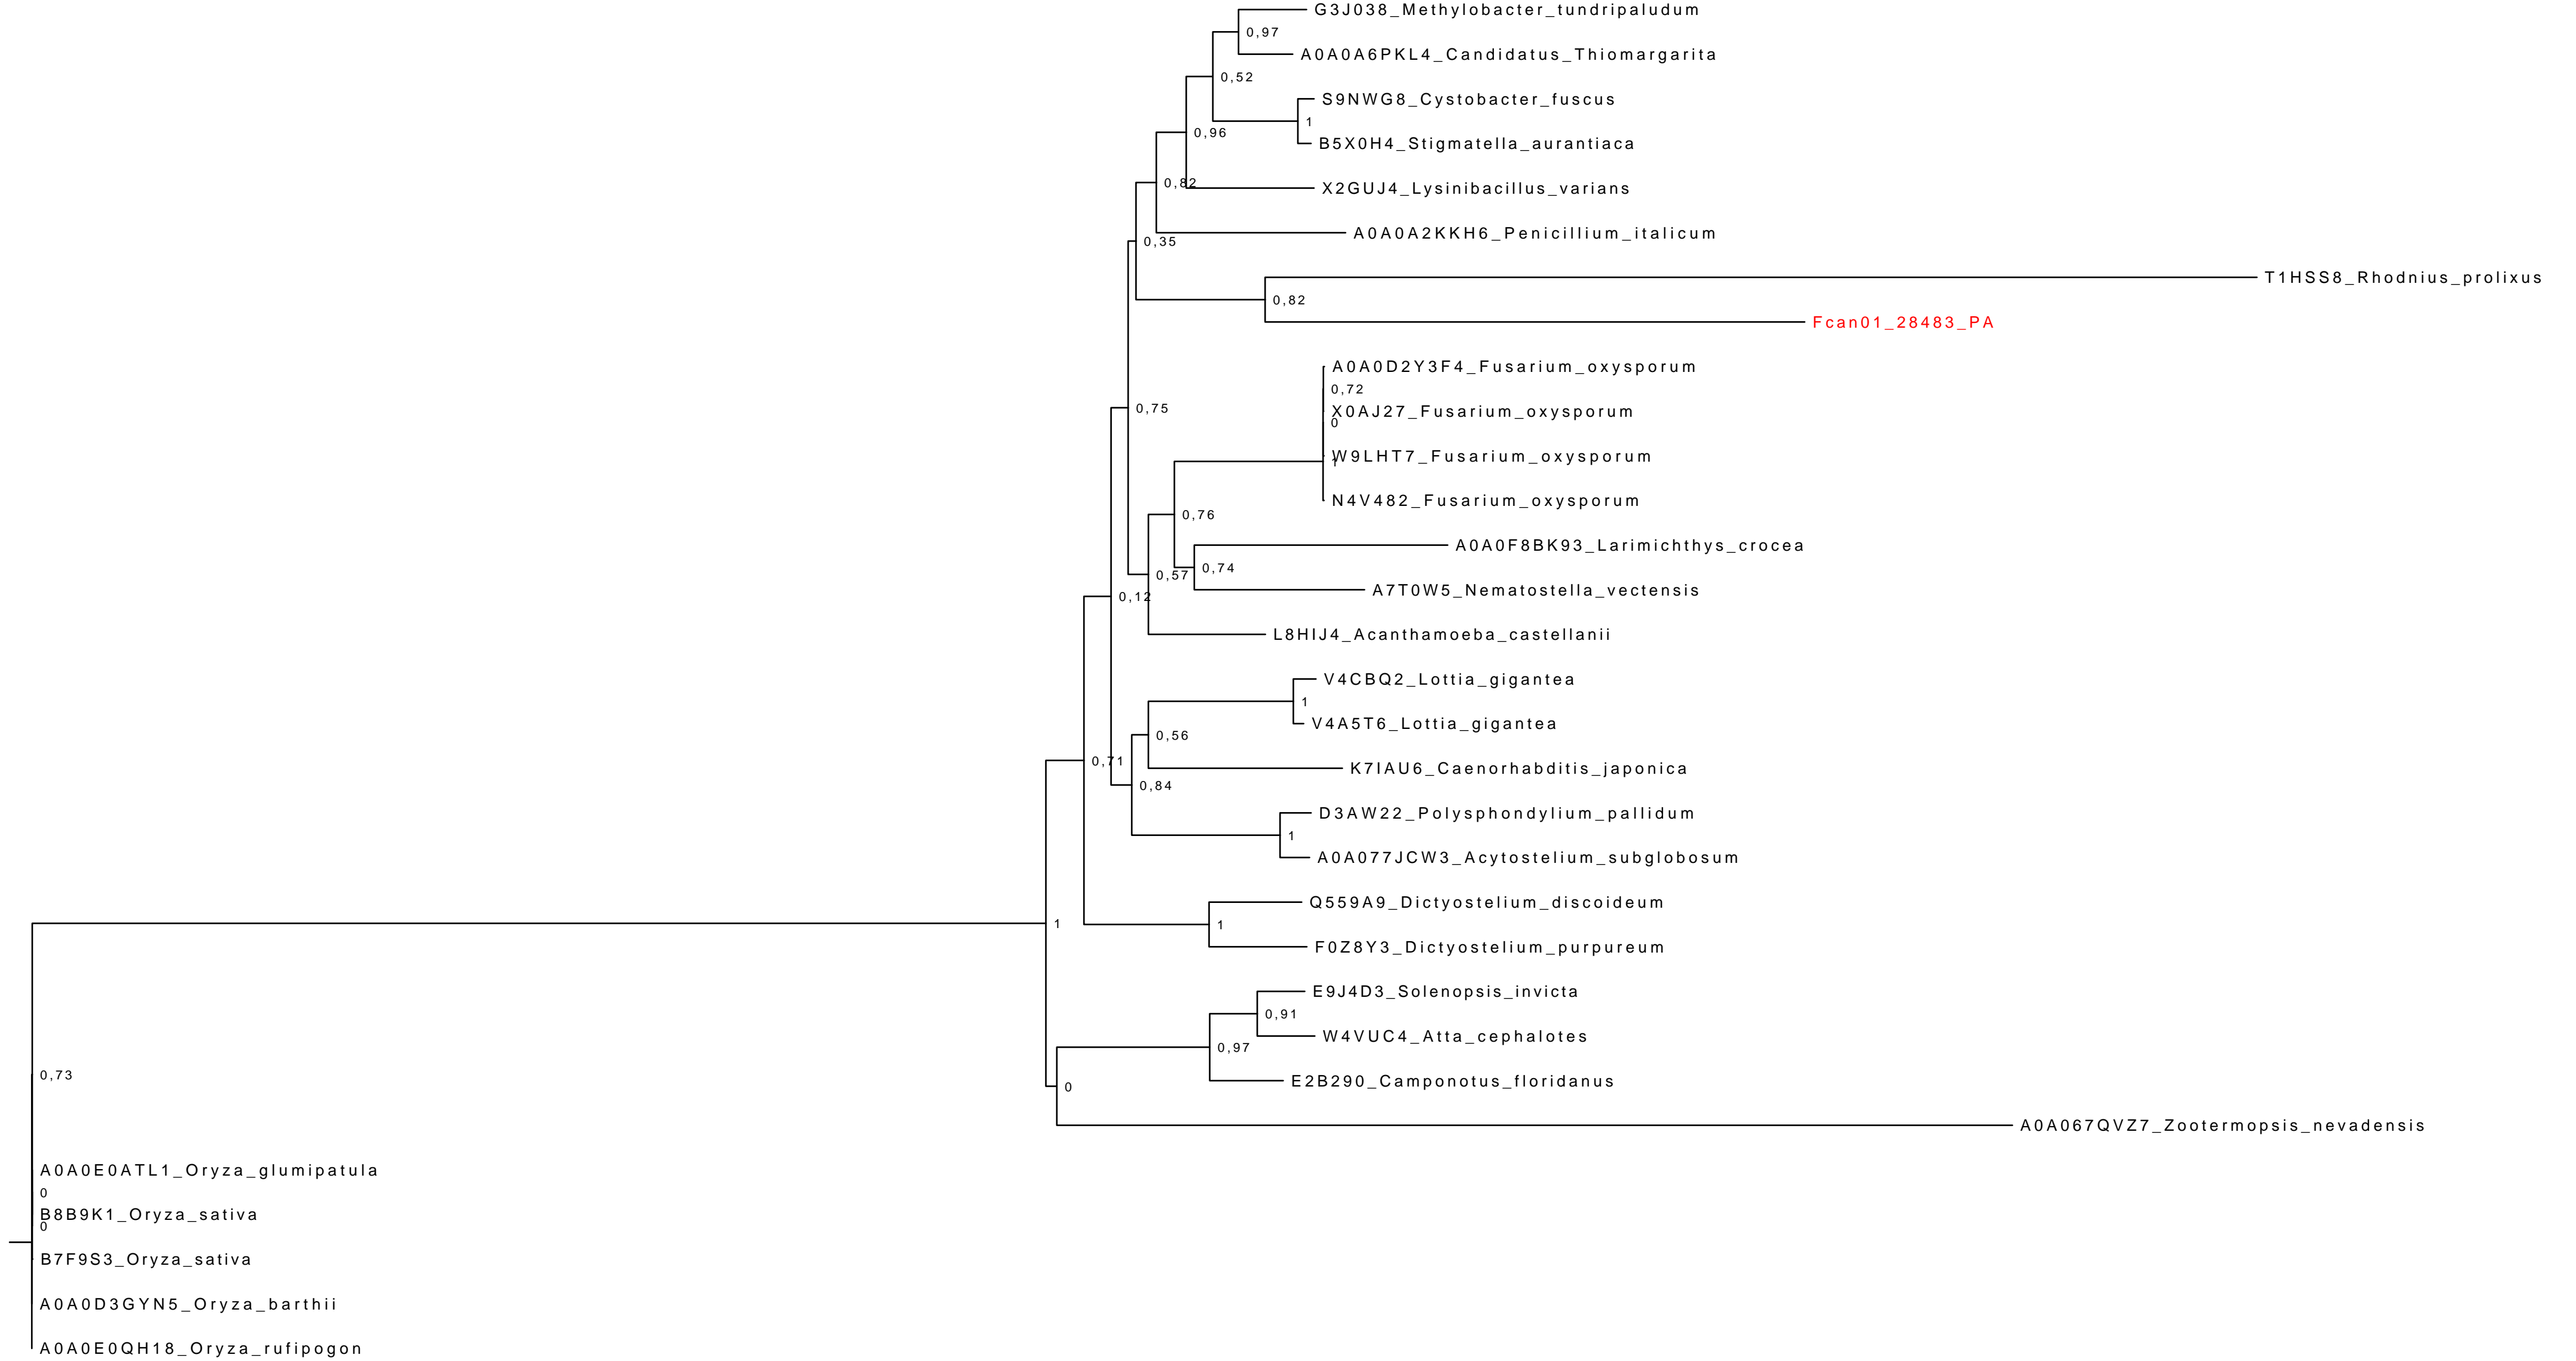



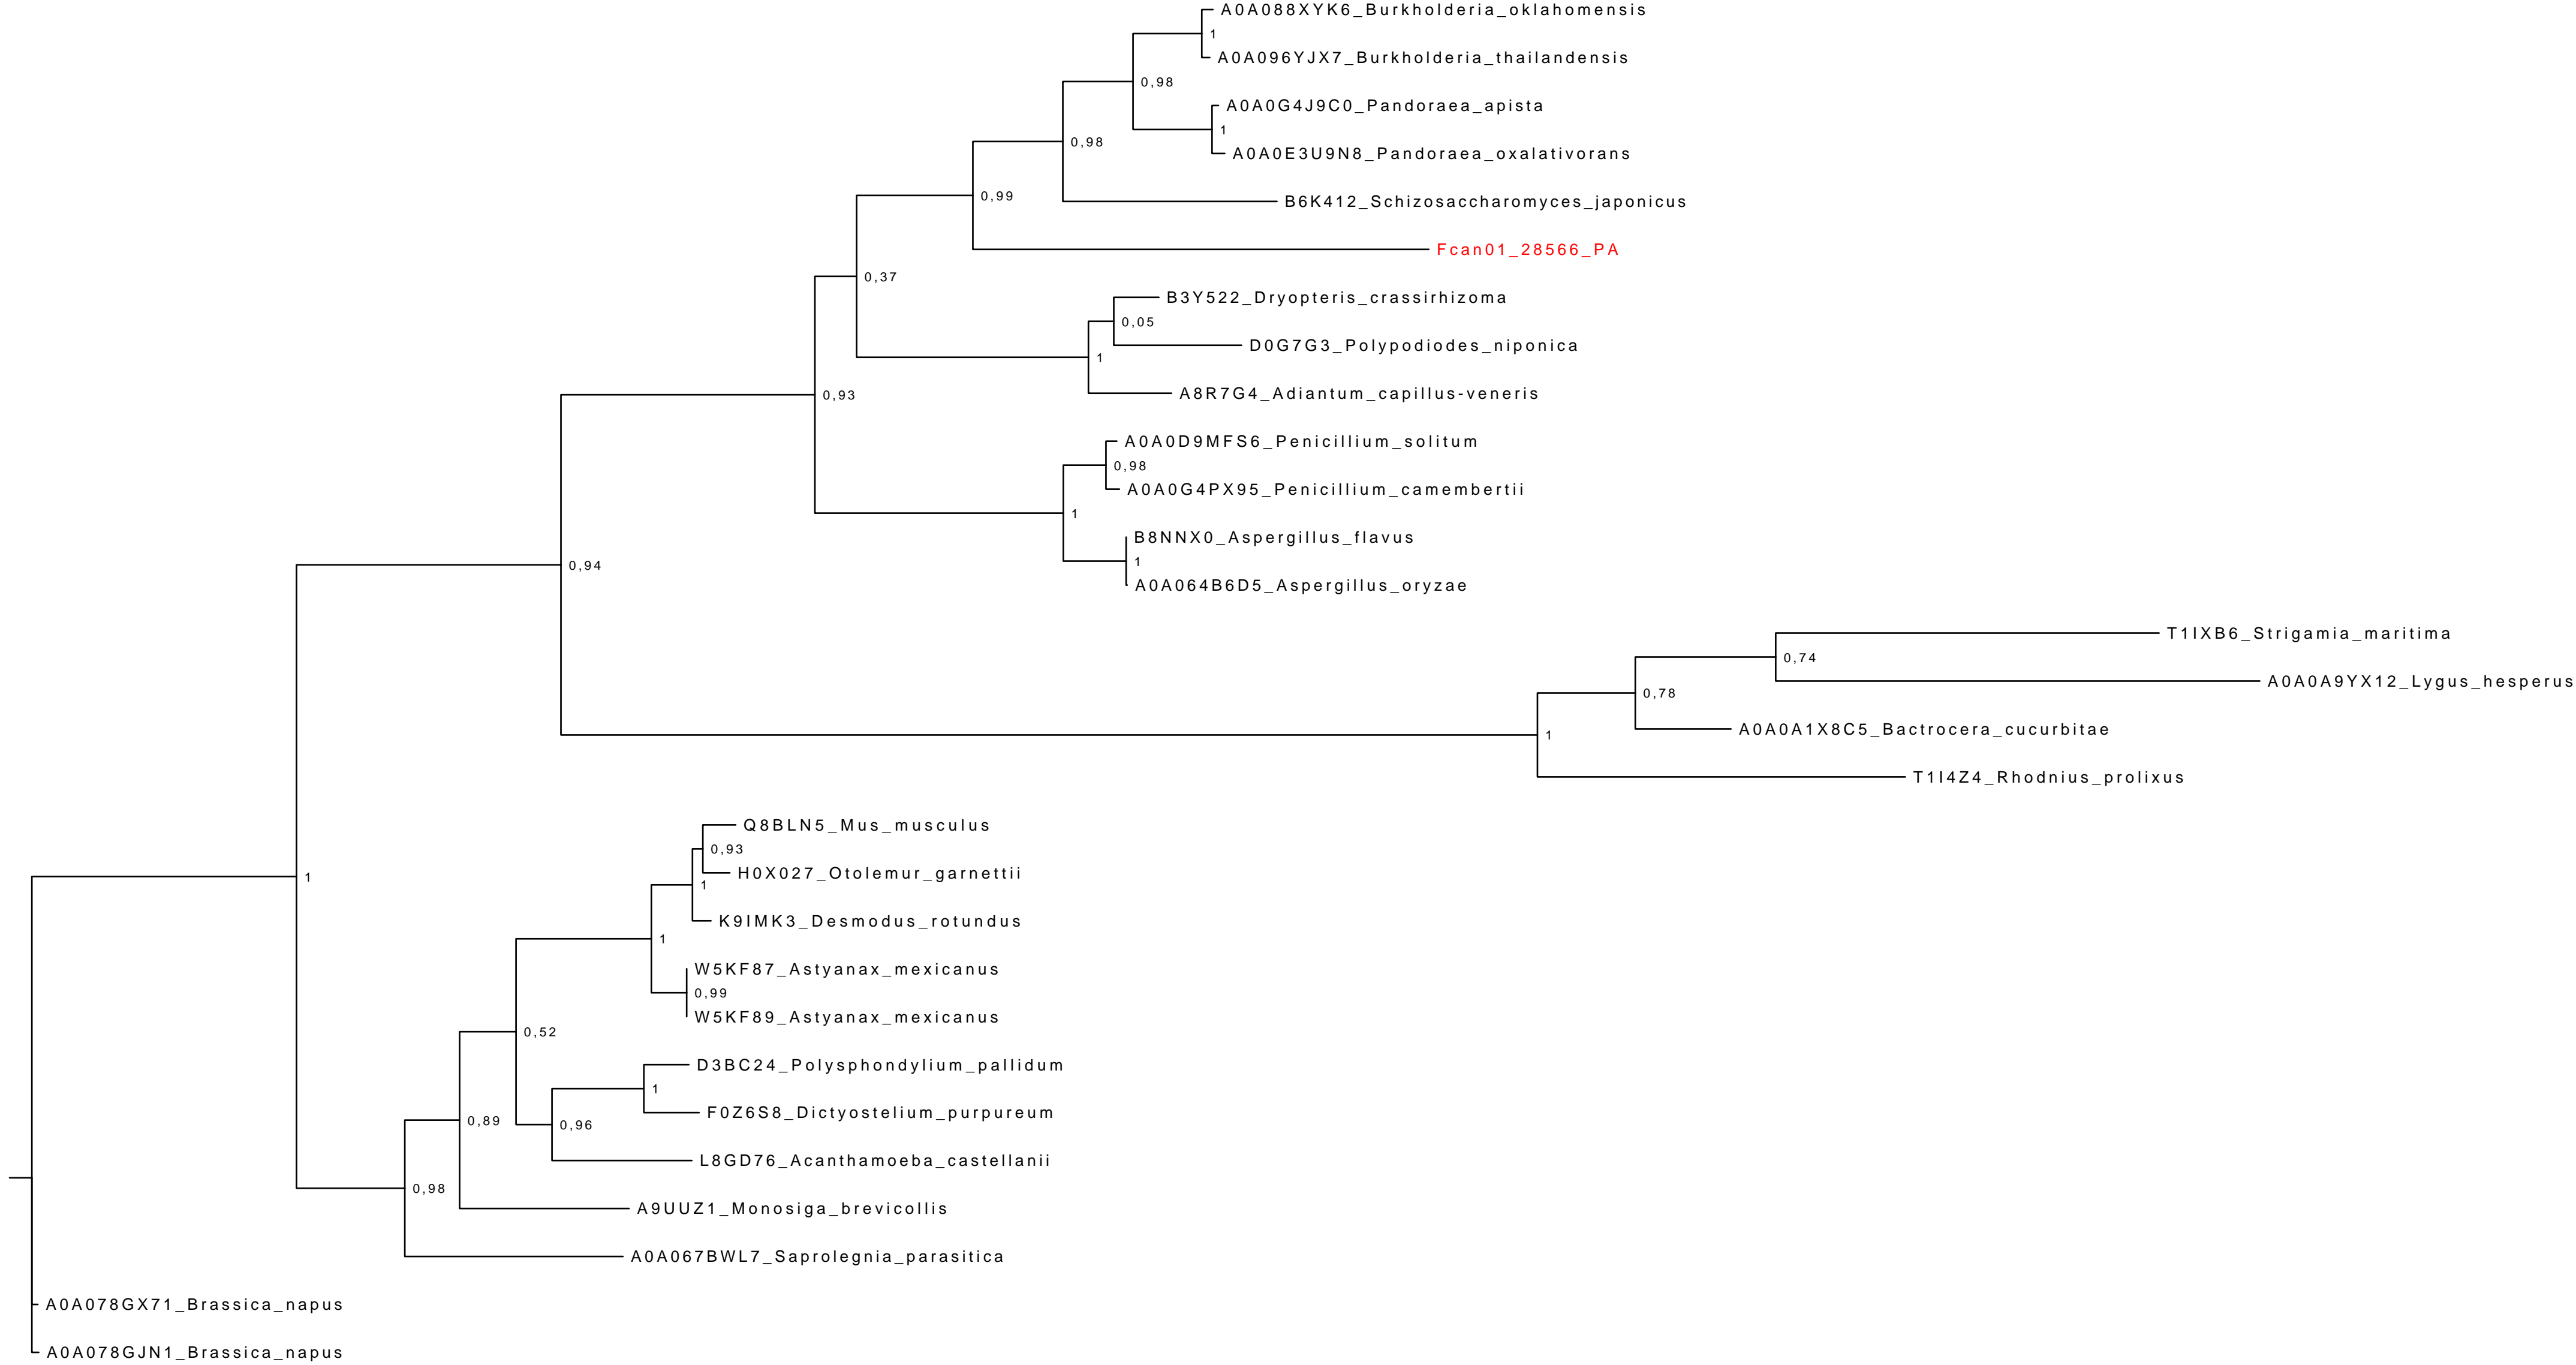

0.7

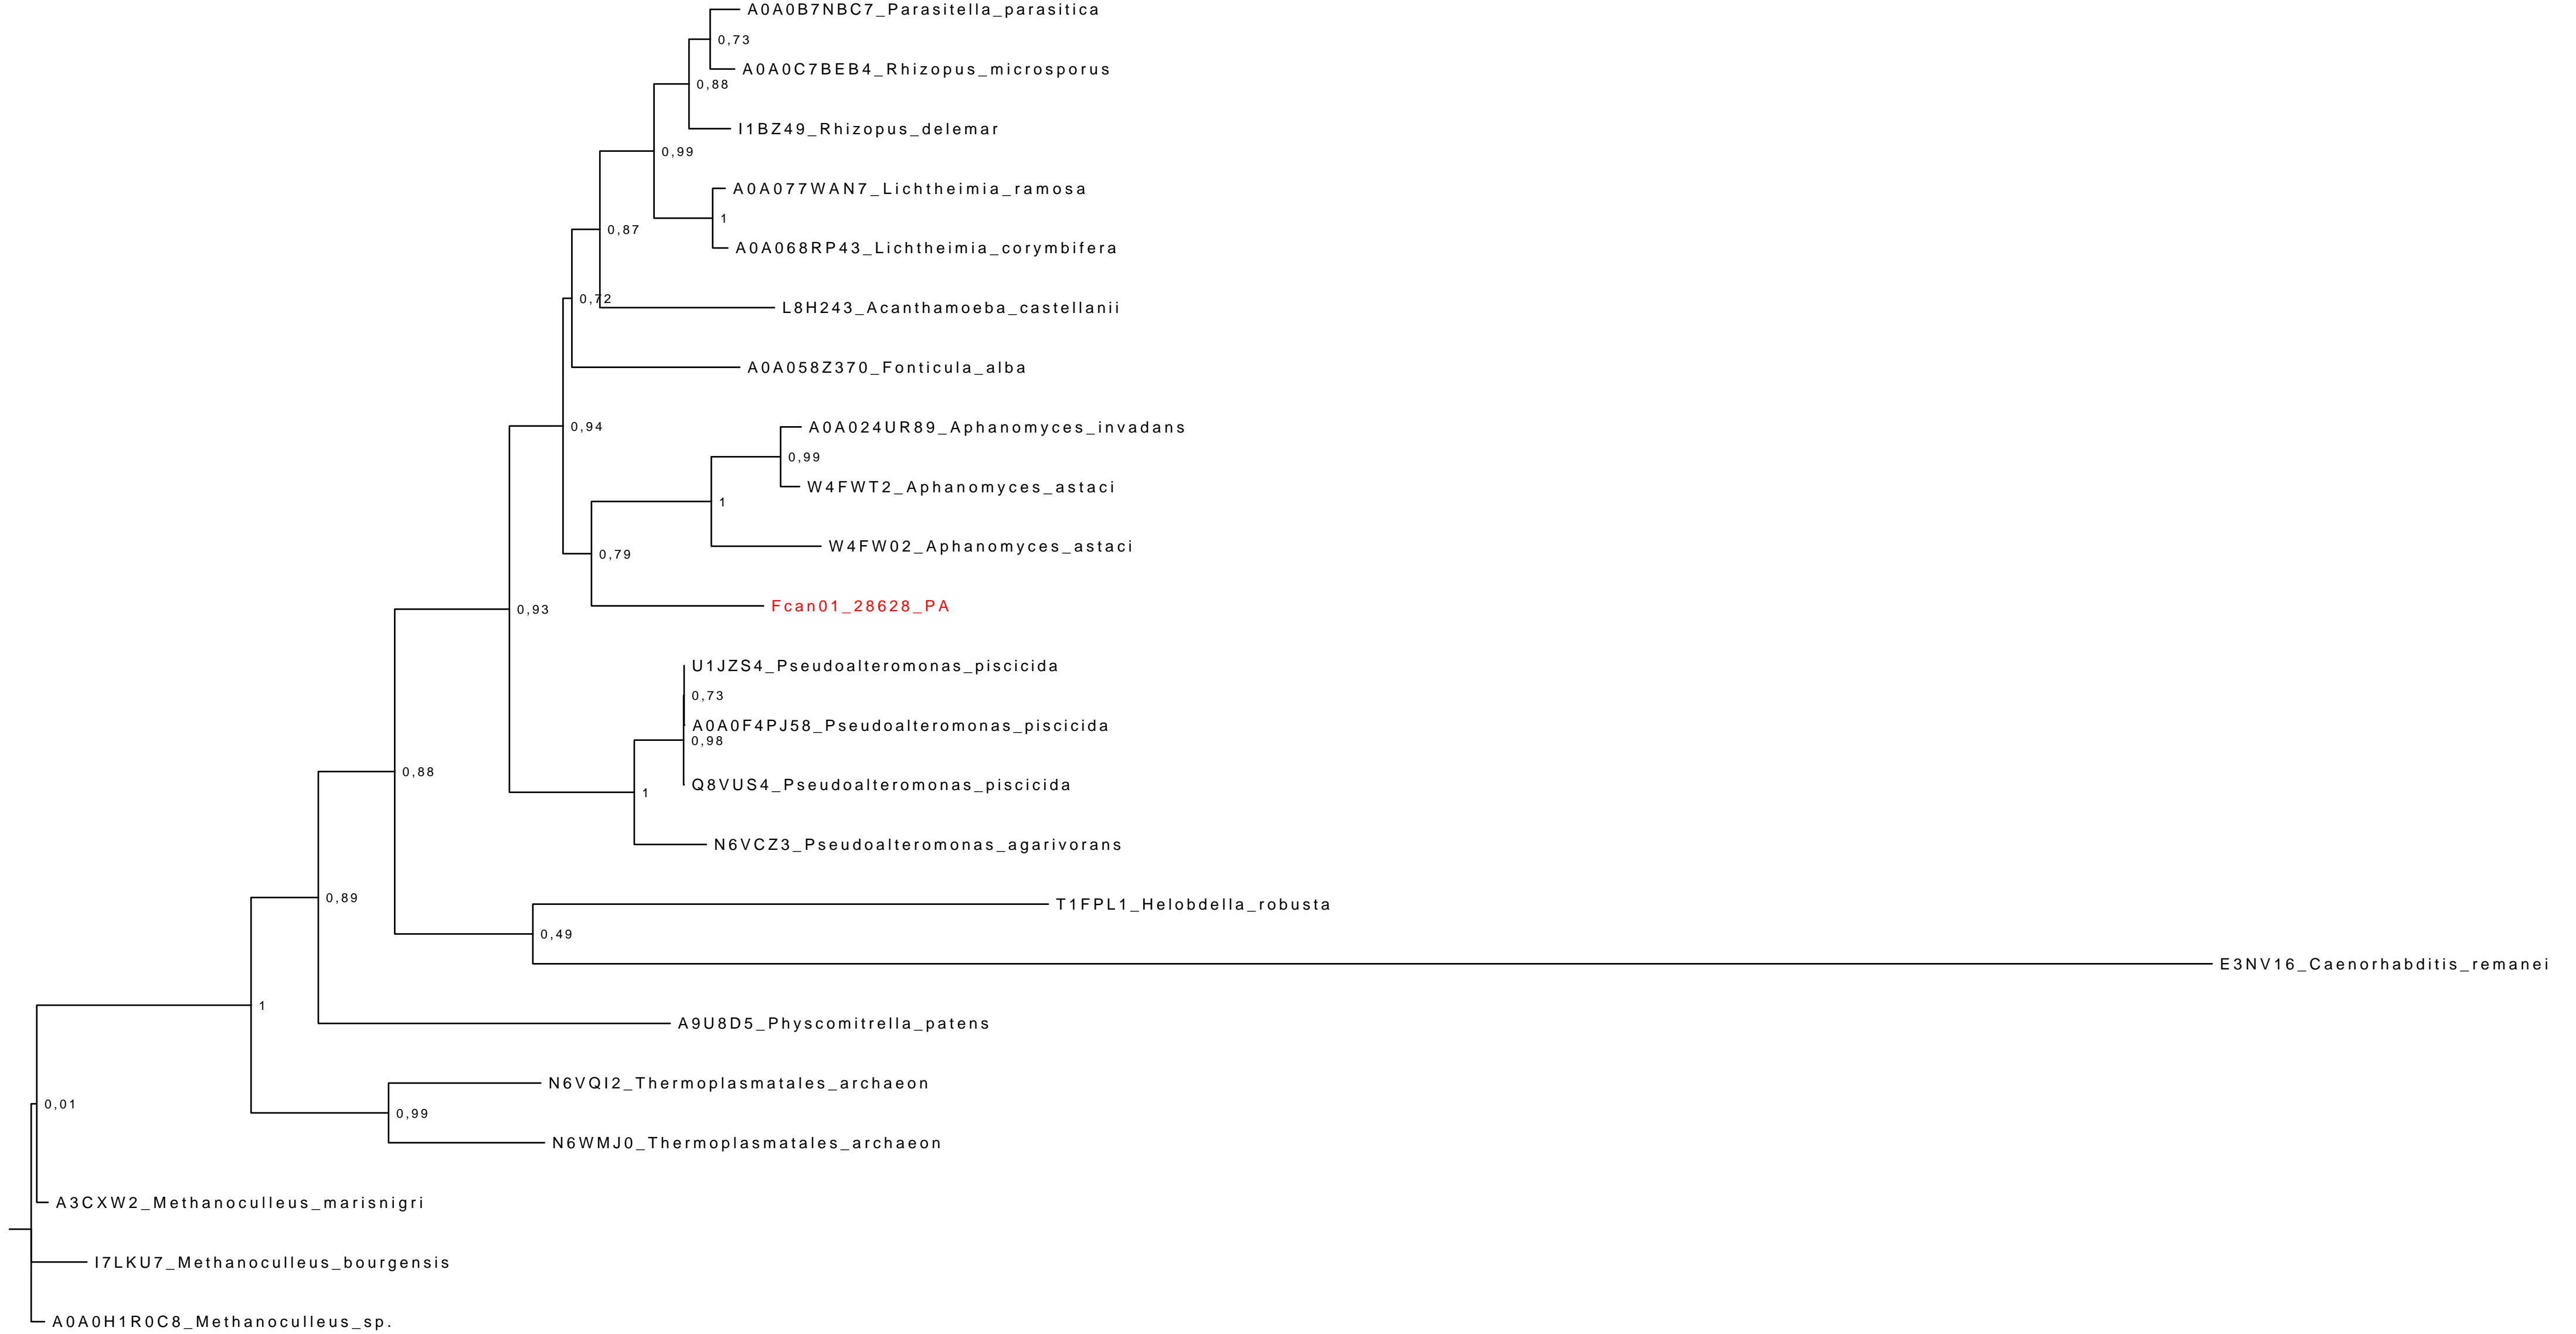

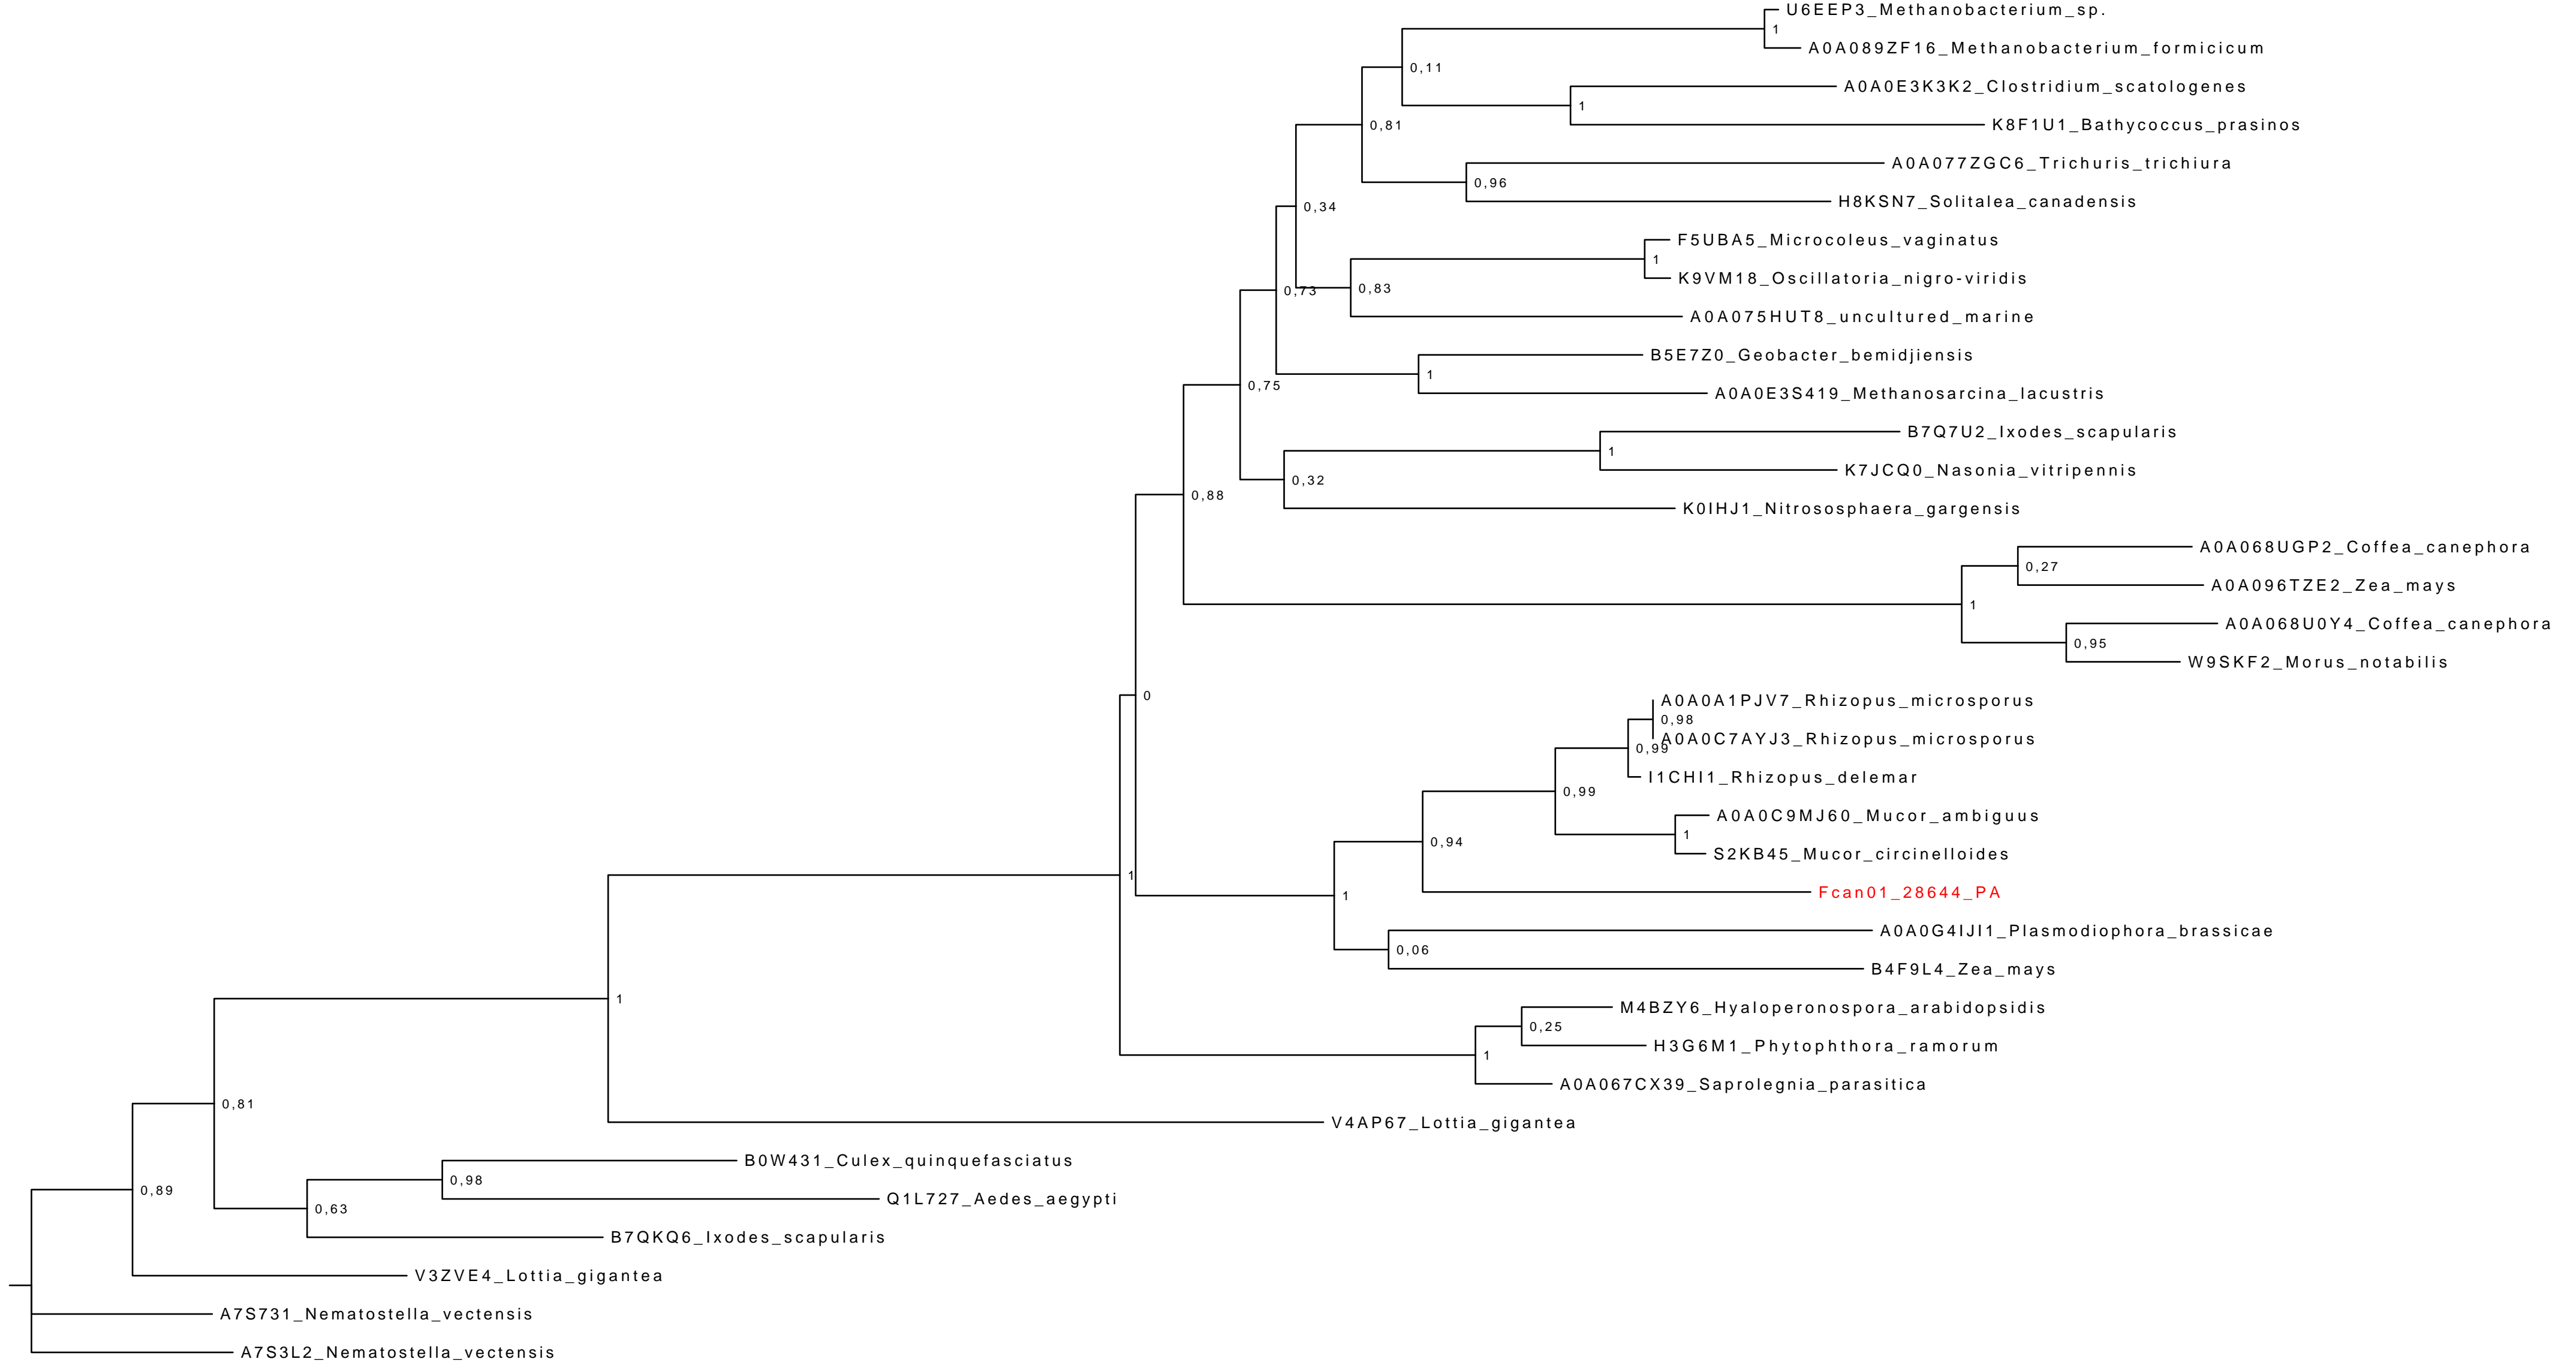

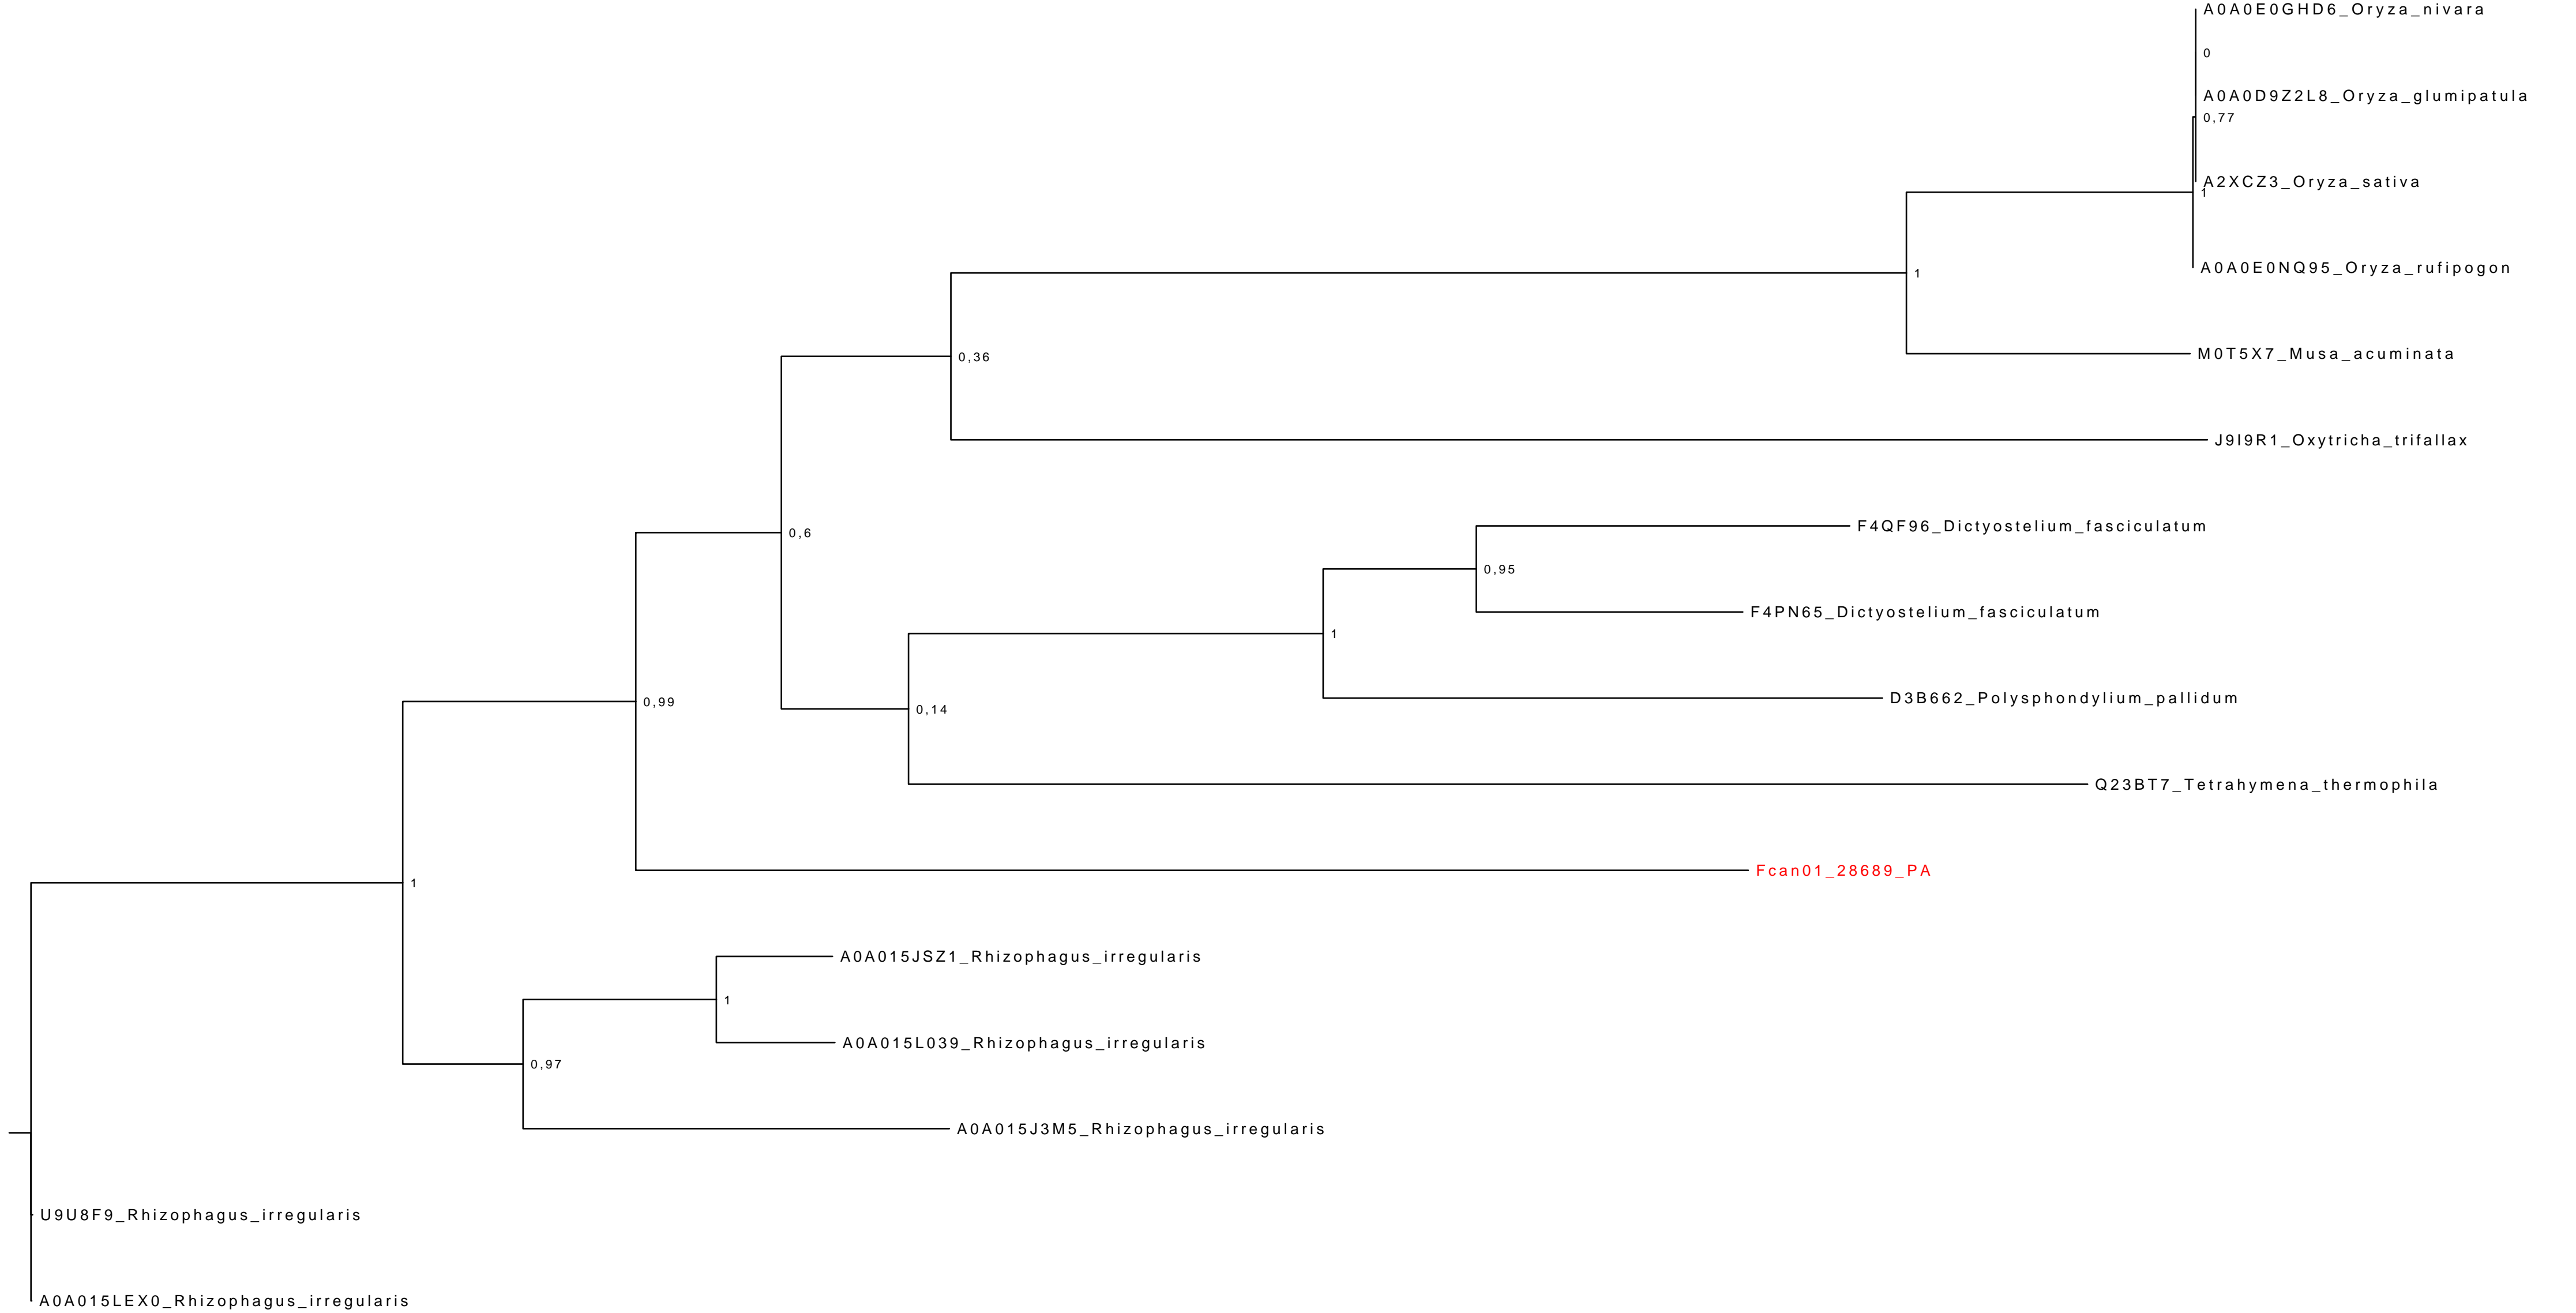

0.3
